# Supplementary material for: Research on the Impact of Environmental Regulation on Enterprise Innovation from the Perspective of Official Communication
Source: Hindawi journal article supplement (doi:10.1155/2021/2004820), 2021-07-31
Supplement: f1 [file 2004820.f1.pdf]

| Code   | year | INNO  | ER   | Rotation | Rotation2  | Size     | Roe      | topl  |
|--------|------|-------|------|----------|------------|----------|----------|-------|
| 601011 | 2015 | 0.368 | 0.08 | 0.362485 | 0.13139504 | 22.57643 | 0.018011 | 36.36 |
| 601011 | 2015 | 0.007 | 0.08 | 0.362485 | 0.13139504 | 22.80764 | 0.018011 | 36.36 |
| 601011 | 2015 | -0.01 | 0.08 | 0.362485 | 0.13139504 | 22.80764 | 0.018011 | 36.36 |
| 601011 | 2015 | 0.368 | 0.08 | 0.362485 | 0.13139504 | 22.80764 | 0.018011 | 36.36 |
| 601011 | 2015 | -0.01 | 0.08 | 0.362485 | 0.13139504 | 22.80764 | 0.018011 | 36.36 |
| 601011 | 2015 | 0.001 | 0.08 | 0.362485 | 0.13139504 | 22.80764 | 0.018011 | 36.36 |
| 601011 | 2015 | -0.32 | 0.08 | 0.362485 | 0.13139504 | 22.80764 | 0.018011 | 36.36 |
| 2596   | 2015 | -0.41 | 0.29 | 1.410365 | 1.9891283  | 21.8768  | 0.041962 | 14.37 |
| 2596   | 2015 | -0.41 | 0.29 | 1.410365 | 1.9891283  | 21.8768  | 0.041962 | 14.37 |
| 2596   | 2015 | -0.41 | 0.29 | 1.410365 | 1.9891283  | 21.67162 | 0.041962 | 14.37 |
| 600403 | 2015 | -0.85 | 0.07 | 0.006384 | 0.00004075 | 23.46887 | -0.16827 | 63.04 |
| 2684   | 2015 | 0.062 | 0.07 | 0.006384 | 0.00004075 | 21.19253 | -0.00047 | 33.41 |
| 2684   | 2015 | -0.03 | 0.07 | 0.006384 | 0.00004075 | 21.19253 | -0.00047 | 33.41 |
| 2684   | 2015 | -0.57 | 0.07 | 0.006384 | 0.00004075 | 21.19253 | -0.00047 | 33.41 |
| 600403 | 2015 | -0.85 | 0.07 | 0.006384 | 0.00004075 | 23.77676 | -0.16827 | 63.04 |
| 2684   | 2015 | -0.02 | 0.07 | 0.006384 | 0.00004075 | 21.19253 | -0.00047 | 33.41 |
| 2684   | 2015 | 0.066 | 0.07 | 0.006384 | 0.00004075 | 21.19253 | -0.00047 | 33.41 |
| 2684   | 2015 | -0.57 | 0.07 | 0.006384 | 0.00004075 | 20.97295 | -0.00047 | 33.41 |
| 600403 | 2015 | -0.85 | 0.07 | 0.006384 | 0.00004075 | 23.46887 | -0.16827 | 63.04 |
| 2684   | 2015 | -0.57 | 0.07 | 0.006384 | 0.00004075 | 21.19253 | -0.00047 | 33.41 |
| 2684   | 2015 | -0.17 | 0.07 | 0.006384 | 0.00004075 | 21.19253 | -0.00047 | 33.41 |
| 2684   | 2015 | -0.02 | 0.07 | 0.006384 | 0.00004075 | 21.19253 | -0.00047 | 33.41 |
| 600403 | 2015 | -0.85 | 0.07 | 0.006384 | 0.00004075 | 23.46887 | -0.16827 | 63.04 |
| 600403 | 2015 | -0.85 | 0.07 | 0.006384 | 0.00004075 | 23.46887 | -0.16827 | 63.04 |
| 2684   | 2015 | -0.57 | 0.07 | 0.006384 | 0.00004075 | 21.19253 | -0.00047 | 33.41 |
| 2684   | 2015 | -0.57 | 0.07 | 0.006384 | 0.00004075 | 21.19253 | -0.00047 | 33.41 |
| 600071 | 2015 | -0.79 | 0.08 | 0.319345 | 0.10198121 | 20.33455 | 0.031747 | 39.46 |
| 600071 | 2015 | -0.79 | 0.08 | 0.319345 | 0.10198121 | 20.33455 | 0.031747 | 39.46 |
| 600373 | 2015 | -0.83 | 0.08 | 0.319345 | 0.10198121 | 23.59158 | 0.112692 | 54.83 |
| 600071 | 2015 | -0.79 | 0.08 | 0.319345 | 0.10198121 | 20.33455 | 0.031747 | 39.46 |
| 600373 | 2015 | -0.17 | 0.08 | 0.319345 | 0.10198121 | 22.99747 | 0.112692 | 54.83 |
| 600071 | 2015 | -0.79 | 0.08 | 0.319345 | 0.10198121 | 20.33455 | 0.031747 | 39.46 |
| 600071 | 2015 | -0.79 | 0.08 | 0.319345 | 0.10198121 | 20.33455 | 0.031747 | 39.46 |
| 600071 | 2015 | -0.79 | 0.08 | 0.319345 | 0.10198121 | 20.33455 | 0.031747 | 39.46 |
| 600373 | 2015 | -0.17 | 0.08 | 0.319345 | 0.10198121 | 23.59158 | 0.112692 | 54.83 |
| 600373 | 2015 | -0.83 | 0.08 | 0.319345 | 0.10198121 | 23.59158 | 0.112692 | 54.83 |
| 600373 | 2015 | -0.41 | 0.08 | 0.319345 | 0.10198121 | 23.59158 | 0.112692 | 54.83 |
| 600071 | 2015 | -0.79 | 0.08 | 0.319345 | 0.10198121 | 20.80686 | 0.031747 | 39.46 |
| 300410 | 2015 | 0.302 | 0.09 | 0.006384 | 0.00004075 | 20.47217 | 0.072928 | 57.11 |
| 300083 | 2015 | -0.73 | 0.09 | 0.006384 | 0.00004075 | 22.89491 | -0.09461 | 29.08 |
| 600183 | 2015 | 0.504 | 0.09 | 0.006384 | 0.00004075 | 22.57332 | 0.115065 | 16.05 |
| 300143 | 2015 | -0.9  | 0.09 | 0.006384 | 0.00004075 | 21.14991 | 0.010203 | 36.54 |
| 2638   | 2015 | -0.46 | 0.09 | 0.006384 | 0.00004075 | 21.8991  | 0.012058 | 27.22 |
| 600183 | 2015 | 0.306 | 0.09 | 0.006384 | 0.00004075 | 22.57332 | 0.115065 | 16.05 |
| 2638   | 2015 | -0.53 | 0.09 | 0.006384 | 0.00004075 | 21.8991  | 0.012058 | 27.22 |
| 300328 | 2015 | 0.641 | 0.09 | 0.006384 | 0.00004075 | 20.64383 | 0.07945  | 59.06 |
| 600183 | 2015 | 0.11  | 0.09 | 0.006384 | 0.00004075 | 22.57332 | 0.115065 | 16.05 |
| 300083 | 2015 | -0.14 | 0.09 | 0.006384 | 0.00004075 | 22.89491 | -0.09461 | 29.08 |
| 300242 | 2015 | -0.48 | 0.09 | 0.006384 | 0.00004075 | 21.66732 | 0.028296 | 26.02 |
| 600183 | 2015 | 0.306 | 0.09 | 0.006384 | 0.00004075 | 22.90482 | 0.115065 | 16.05 |
| 2638   | 2015 | -0.27 | 0.09 | 0.006384 | 0.00004075 | 21.8991  | 0.012058 | 27.22 |
| 2717   | 2015 | 0.005 | 0.09 | 0.006384 | 0.00004075 | 21.96257 | 0.175495 | 43.76 |
| 300376 | 2015 | 0.027 | 0.09 | 0.006384 | 0.00004075 | 22.21328 | 0.205975 | 65.28 |

|        |      |       |      |          |            |          |          |       |
|--------|------|-------|------|----------|------------|----------|----------|-------|
| 300143 | 2015 | -0.9  | 0.09 | 0.006384 | 0.00004075 | 21.33784 | 0.010203 | 36.54 |
| 300083 | 2015 | -0.34 | 0.09 | 0.006384 | 0.00004075 | 22.89491 | -0.09461 | 29.08 |
| 300143 | 2015 | -0.46 | 0.09 | 0.006384 | 0.00004075 | 21.14991 | 0.010203 | 36.54 |
| 300328 | 2015 | 0.717 | 0.09 | 0.006384 | 0.00004075 | 20.59919 | 0.07945  | 59.06 |
| 300083 | 2015 | -0.48 | 0.09 | 0.006384 | 0.00004075 | 22.89491 | -0.09461 | 29.08 |
| 2317   | 2015 | 0.218 | 0.09 | 0.006384 | 0.00004075 | 21.92745 | 0.14014  | 31.92 |
| 300410 | 2015 | -0.03 | 0.09 | 0.006384 | 0.00004075 | 20.47217 | 0.072928 | 57.11 |
| 300376 | 2015 | 0.773 | 0.09 | 0.006384 | 0.00004075 | 22.21328 | 0.205975 | 65.28 |
| 2717   | 2015 | -0.28 | 0.09 | 0.006384 | 0.00004075 | 22.01406 | 0.175495 | 43.76 |
| 300083 | 2015 | -0.43 | 0.09 | 0.006384 | 0.00004075 | 22.89491 | -0.09461 | 29.08 |
| 300143 | 2015 | -0.9  | 0.09 | 0.006384 | 0.00004075 | 21.14991 | 0.010203 | 36.54 |
| 300083 | 2015 | -0.03 | 0.09 | 0.006384 | 0.00004075 | 22.89491 | -0.09461 | 29.08 |
| 300221 | 2015 | 0.239 | 0.09 | 0.006384 | 0.00004075 | 20.96634 | 0.051725 | 26.04 |
| 300083 | 2015 | -0.39 | 0.09 | 0.006384 | 0.00004075 | 22.89491 | -0.09461 | 29.08 |
| 300376 | 2015 | 0.116 | 0.09 | 0.006384 | 0.00004075 | 22.08965 | 0.205975 | 65.28 |
| 2638   | 2015 | -0.46 | 0.09 | 0.006384 | 0.00004075 | 21.8991  | 0.012058 | 27.22 |
| 300376 | 2015 | 0.681 | 0.09 | 0.006384 | 0.00004075 | 22.21328 | 0.205975 | 65.28 |
| 300221 | 2015 | 0.285 | 0.09 | 0.006384 | 0.00004075 | 20.96634 | 0.051725 | 26.04 |
| 300221 | 2015 | 0.239 | 0.09 | 0.006384 | 0.00004075 | 20.96634 | 0.051725 | 26.04 |
| 2317   | 2015 | 0.085 | 0.09 | 0.006384 | 0.00004075 | 21.92745 | 0.14014  | 31.92 |
| 300242 | 2015 | -0.48 | 0.09 | 0.006384 | 0.00004075 | 21.52963 | 0.028296 | 26.02 |
| 300083 | 2015 | -0.29 | 0.09 | 0.006384 | 0.00004075 | 22.89491 | -0.09461 | 29.08 |
| 300376 | 2015 | 0.612 | 0.09 | 0.006384 | 0.00004075 | 22.21328 | 0.205975 | 65.28 |
| 2317   | 2015 | 0.79  | 0.09 | 0.006384 | 0.00004075 | 21.92745 | 0.14014  | 31.92 |
| 300083 | 2015 | -0.28 | 0.09 | 0.006384 | 0.00004075 | 22.89491 | -0.09461 | 29.08 |
| 2317   | 2015 | -0.42 | 0.09 | 0.006384 | 0.00004075 | 21.92745 | 0.14014  | 31.92 |
| 300328 | 2015 | -0.26 | 0.09 | 0.006384 | 0.00004075 | 20.64383 | 0.07945  | 59.06 |
| 2317   | 2015 | 0.904 | 0.09 | 0.006384 | 0.00004075 | 21.7893  | 0.14014  | 31.92 |
| 600183 | 2015 | 0.282 | 0.09 | 0.006384 | 0.00004075 | 22.57332 | 0.115065 | 16.05 |
| 2317   | 2015 | 0.308 | 0.09 | 0.006384 | 0.00004075 | 21.92745 | 0.14014  | 31.92 |
| 2638   | 2015 | -0.3  | 0.09 | 0.006384 | 0.00004075 | 21.8991  | 0.012058 | 27.22 |
| 2638   | 2015 | -0.53 | 0.09 | 0.006384 | 0.00004075 | 21.89956 | 0.012058 | 27.22 |
| 300083 | 2015 | -0.5  | 0.09 | 0.006384 | 0.00004075 | 22.89491 | -0.09461 | 29.08 |
| 300376 | 2015 | 0.184 | 0.09 | 0.006384 | 0.00004075 | 22.21328 | 0.205975 | 65.28 |
| 300221 | 2015 | 0.102 | 0.09 | 0.006384 | 0.00004075 | 20.70185 | 0.051725 | 26.04 |
| 600183 | 2015 | 0.11  | 0.09 | 0.006384 | 0.00004075 | 22.57332 | 0.115065 | 16.05 |
| 2717   | 2015 | -0.65 | 0.09 | 0.006384 | 0.00004075 | 22.01406 | 0.175495 | 43.76 |
| 300083 | 2015 | -0.3  | 0.09 | 0.006384 | 0.00004075 | 22.89491 | -0.09461 | 29.08 |
| 600183 | 2015 | -0.05 | 0.09 | 0.006384 | 0.00004075 | 22.57332 | 0.115065 | 16.05 |
| 300410 | 2015 | 0.179 | 0.09 | 0.006384 | 0.00004075 | 20.47217 | 0.072928 | 57.11 |
| 300221 | 2015 | 0.351 | 0.09 | 0.006384 | 0.00004075 | 20.96634 | 0.051725 | 26.04 |
| 300083 | 2015 | -0.56 | 0.09 | 0.006384 | 0.00004075 | 22.81604 | -0.09461 | 29.08 |
| 2638   | 2015 | -0.46 | 0.09 | 0.006384 | 0.00004075 | 21.8991  | 0.012058 | 27.22 |
| 300328 | 2015 | 0.717 | 0.09 | 0.006384 | 0.00004075 | 20.64383 | 0.07945  | 59.06 |
| 2717   | 2015 | -0.22 | 0.09 | 0.006384 | 0.00004075 | 22.01406 | 0.175495 | 43.76 |
| 300221 | 2015 | 0.445 | 0.09 | 0.006384 | 0.00004075 | 20.96634 | 0.051725 | 26.04 |
| 300083 | 2015 | -0.09 | 0.09 | 0.006384 | 0.00004075 | 22.89491 | -0.09461 | 29.08 |
| 300410 | 2015 | 0.366 | 0.09 | 0.006384 | 0.00004075 | 20.47217 | 0.072928 | 57.11 |
| 300083 | 2015 | -0.32 | 0.09 | 0.006384 | 0.00004075 | 22.89491 | -0.09461 | 29.08 |
| 2317   | 2015 | 0.79  | 0.09 | 0.006384 | 0.00004075 | 21.92745 | 0.14014  | 31.92 |
| 300083 | 2015 | -0.73 | 0.09 | 0.006384 | 0.00004075 | 22.89491 | -0.09461 | 29.08 |
| 300221 | 2015 | 0.102 | 0.09 | 0.006384 | 0.00004075 | 20.96634 | 0.051725 | 26.04 |
| 300410 | 2015 | 0.462 | 0.09 | 0.006384 | 0.00004075 | 20.47217 | 0.072928 | 57.11 |
| 300143 | 2015 | -0.9  | 0.09 | 0.006384 | 0.00004075 | 21.14991 | 0.010203 | 36.54 |



|        |      |       |      |          |            |          |          |       |
|--------|------|-------|------|----------|------------|----------|----------|-------|
| 300410 | 2015 | 0.179 | 0.09 | 0.006384 | 0.00004075 | 20.47217 | 0.072928 | 57.11 |
| 600183 | 2015 | 0.296 | 0.09 | 0.006384 | 0.00004075 | 22.57332 | 0.115065 | 16.05 |
| 600183 | 2015 | 0.395 | 0.09 | 0.006384 | 0.00004075 | 22.57332 | 0.115065 | 16.05 |
| 300143 | 2015 | -0.46 | 0.09 | 0.006384 | 0.00004075 | 21.14991 | 0.010203 | 36.54 |
| 300410 | 2015 | 0.105 | 0.09 | 0.006384 | 0.00004075 | 20.47217 | 0.072928 | 57.11 |
| 2717   | 2015 | -0.19 | 0.09 | 0.006384 | 0.00004075 | 22.01406 | 0.175495 | 43.76 |
| 300328 | 2015 | 0.717 | 0.09 | 0.006384 | 0.00004075 | 20.64383 | 0.07945  | 59.06 |
| 300242 | 2015 | -0.48 | 0.09 | 0.006384 | 0.00004075 | 21.66732 | 0.028296 | 26.02 |
| 2717   | 2015 | -0.65 | 0.09 | 0.006384 | 0.00004075 | 22.01406 | 0.175495 | 43.76 |
| 300376 | 2015 | 0.269 | 0.09 | 0.006384 | 0.00004075 | 22.21328 | 0.205975 | 65.28 |
| 300410 | 2015 | -0.03 | 0.09 | 0.006384 | 0.00004075 | 20.39044 | 0.072928 | 57.11 |
| 2638   | 2015 | -0.27 | 0.09 | 0.006384 | 0.00004075 | 21.8991  | 0.012058 | 27.22 |
| 300221 | 2015 | 0.239 | 0.09 | 0.006384 | 0.00004075 | 20.96634 | 0.051725 | 26.04 |
| 300328 | 2015 | 0.577 | 0.09 | 0.006384 | 0.00004075 | 20.64383 | 0.07945  | 59.06 |
| 300143 | 2015 | -0.24 | 0.09 | 0.006384 | 0.00004075 | 21.14991 | 0.010203 | 36.54 |
| 300285 | 2015 | 1.058 | 0.05 | 0.283059 | 0.08012263 | 20.89448 | 0.1123   | 18.94 |
| 300285 | 2015 | 1.058 | 0.05 | 0.283059 | 0.08012263 | 20.89448 | 0.1123   | 18.94 |
| 600308 | 2015 | -0.58 | 0.05 | 0.283059 | 0.08012263 | 23.49787 | 0.007176 | 35.64 |
| 600308 | 2015 | -0.58 | 0.05 | 0.283059 | 0.08012263 | 23.22781 | 0.007176 | 35.64 |
| 2476   | 2015 | -0.4  | 0.05 | 0.283059 | 0.08012263 | 21.16014 | -0.00898 | 18.1  |
| 600986 | 2015 | -0.94 | 0.05 | 0.283059 | 0.08012263 | 22.90758 | 0.031715 | 15.86 |
| 600308 | 2015 | -0.58 | 0.05 | 0.283059 | 0.08012263 | 23.49787 | 0.007176 | 35.64 |
| 300285 | 2015 | 1.058 | 0.05 | 0.283059 | 0.08012263 | 20.89448 | 0.1123   | 18.94 |
| 600308 | 2015 | -0.58 | 0.05 | 0.283059 | 0.08012263 | 23.49787 | 0.007176 | 35.64 |
| 600986 | 2015 | -0.94 | 0.05 | 0.283059 | 0.08012263 | 22.90758 | 0.031715 | 15.86 |
| 300285 | 2015 | 0.372 | 0.05 | 0.283059 | 0.08012263 | 20.70679 | 0.1123   | 18.94 |
| 2476   | 2015 | 0.567 | 0.05 | 0.283059 | 0.08012263 | 20.99364 | -0.00898 | 18.1  |
| 600986 | 2015 | -0.94 | 0.05 | 0.283059 | 0.08012263 | 22.62526 | 0.031715 | 15.86 |
| 600986 | 2015 | -0.94 | 0.05 | 0.283059 | 0.08012263 | 22.90758 | 0.031715 | 15.86 |
| 2476   | 2015 | 0.567 | 0.05 | 0.283059 | 0.08012263 | 21.16014 | -0.00898 | 18.1  |
| 600308 | 2015 | -0.58 | 0.05 | 0.283059 | 0.08012263 | 23.49787 | 0.007176 | 35.64 |
| 2476   | 2015 | -0.4  | 0.05 | 0.283059 | 0.08012263 | 21.16014 | -0.00898 | 18.1  |
| 600986 | 2015 | -0.94 | 0.05 | 0.283059 | 0.08012263 | 22.90758 | 0.031715 | 15.86 |
| 2476   | 2015 | -0.05 | 0.05 | 0.283059 | 0.08012263 | 21.16014 | -0.00898 | 18.1  |
| 300285 | 2015 | 1.058 | 0.05 | 0.283059 | 0.08012263 | 20.89448 | 0.1123   | 18.94 |
| 600308 | 2015 | -0.58 | 0.05 | 0.283059 | 0.08012263 | 23.49787 | 0.007176 | 35.64 |
| 600986 | 2015 | -0.94 | 0.05 | 0.283059 | 0.08012263 | 22.90758 | 0.031715 | 15.86 |
| 300285 | 2015 | 0.982 | 0.05 | 0.283059 | 0.08012263 | 20.89448 | 0.1123   | 18.94 |
| 600308 | 2015 | -0.58 | 0.05 | 0.283059 | 0.08012263 | 23.49787 | 0.007176 | 35.64 |
| 300285 | 2015 | 0.372 | 0.05 | 0.283059 | 0.08012263 | 20.89448 | 0.1123   | 18.94 |
| 600308 | 2015 | -0.58 | 0.05 | 0.283059 | 0.08012263 | 23.49787 | 0.007176 | 35.64 |
| 300285 | 2015 | 1.058 | 0.05 | 0.283059 | 0.08012263 | 20.89448 | 0.1123   | 18.94 |
| 600308 | 2015 | -0.58 | 0.05 | 0.283059 | 0.08012263 | 23.49787 | 0.007176 | 35.64 |
| 600986 | 2015 | -0.94 | 0.05 | 0.283059 | 0.08012263 | 22.90758 | 0.031715 | 15.86 |
| 600308 | 2015 | -0.58 | 0.05 | 0.283059 | 0.08012263 | 23.49787 | 0.007176 | 35.64 |
| 2249   | 2015 | -0.34 | 0.09 | 1.28248  | 1.6447553  | 22.7522  | 0.096696 | 43.82 |
| 600872 | 2015 | 0.18  | 0.09 | 1.28248  | 1.6447553  | 22.23247 | 0.097929 | 18.5  |
| 603328 | 2015 | 0.226 | 0.09 | 1.28248  | 1.6447553  | 22.3734  | 0.107327 | 74.18 |
| 2511   | 2015 | -0.87 | 0.09 | 1.28248  | 1.6447553  | 22.23713 | 0.036236 | 30.06 |
| 2249   | 2015 | -0.4  | 0.09 | 1.28248  | 1.6447553  | 22.50474 | 0.096696 | 43.82 |
| 2616   | 2015 | -0.84 | 0.09 | 1.28248  | 1.6447553  | 21.78944 | 0.06871  | 24.45 |
| 2511   | 2015 | -0.87 | 0.09 | 1.28248  | 1.6447553  | 22.23713 | 0.036236 | 30.06 |
| 2511   | 2015 | -0.87 | 0.09 | 1.28248  | 1.6447553  | 21.76602 | 0.036236 | 30.06 |
| 2035   | 2015 | -0.53 | 0.09 | 1.28248  | 1.6447553  | 21.74424 | 0.138431 | 17.42 |

|        |      |       |      |          |           |          |          |       |
|--------|------|-------|------|----------|-----------|----------|----------|-------|
| 300359 | 2015 | 0.245 | 0.09 | 1.28248  | 1.6447553 | 21.57717 | 0.057939 | 33.09 |
| 2249   | 2015 | -0.4  | 0.09 | 1.28248  | 1.6447553 | 22.7522  | 0.096696 | 43.82 |
| 603328 | 2015 | 0.226 | 0.09 | 1.28248  | 1.6447553 | 22.34867 | 0.107327 | 74.18 |
| 2616   | 2015 | -0.69 | 0.09 | 1.28248  | 1.6447553 | 21.78944 | 0.06871  | 24.45 |
| 2035   | 2015 | -0.64 | 0.09 | 1.28248  | 1.6447553 | 21.74424 | 0.138431 | 17.42 |
| 2249   | 2015 | -0.32 | 0.09 | 1.28248  | 1.6447553 | 22.7522  | 0.096696 | 43.82 |
| 2511   | 2015 | -0.87 | 0.09 | 1.28248  | 1.6447553 | 22.23713 | 0.036236 | 30.06 |
| 2249   | 2015 | -0.27 | 0.09 | 1.28248  | 1.6447553 | 22.7522  | 0.096696 | 43.82 |
| 2249   | 2015 | -0.4  | 0.09 | 1.28248  | 1.6447553 | 22.7522  | 0.096696 | 43.82 |
| 600872 | 2015 | 0.131 | 0.09 | 1.28248  | 1.6447553 | 22.23247 | 0.097929 | 18.5  |
| 600872 | 2015 | 0.18  | 0.09 | 1.28248  | 1.6447553 | 22.23247 | 0.097929 | 18.5  |
| 2249   | 2015 | -0.4  | 0.09 | 1.28248  | 1.6447553 | 22.7522  | 0.096696 | 43.82 |
| 2035   | 2015 | -0.64 | 0.09 | 1.28248  | 1.6447553 | 21.74424 | 0.138431 | 17.42 |
| 2035   | 2015 | -0.64 | 0.09 | 1.28248  | 1.6447553 | 21.74424 | 0.138431 | 17.42 |
| 2616   | 2015 | -0.69 | 0.09 | 1.28248  | 1.6447553 | 21.78944 | 0.06871  | 24.45 |
| 2249   | 2015 | -0.5  | 0.09 | 1.28248  | 1.6447553 | 22.7522  | 0.096696 | 43.82 |
| 600872 | 2015 | 0.18  | 0.09 | 1.28248  | 1.6447553 | 22.23247 | 0.097929 | 18.5  |
| 2668   | 2015 | -0.29 | 0.09 | 1.28248  | 1.6447553 | 22.15249 | 0.148474 | 20.38 |
| 600872 | 2015 | 0.18  | 0.09 | 1.28248  | 1.6447553 | 22.23247 | 0.097929 | 18.5  |
| 2668   | 2015 | -0.29 | 0.09 | 1.28248  | 1.6447553 | 22.18943 | 0.148474 | 20.38 |
| 2668   | 2015 | -0.29 | 0.09 | 1.28248  | 1.6447553 | 22.18943 | 0.148474 | 20.38 |
| 2035   | 2015 | -0.56 | 0.09 | 1.28248  | 1.6447553 | 21.60268 | 0.138431 | 17.42 |
| 2249   | 2015 | -0.28 | 0.09 | 1.28248  | 1.6447553 | 22.7522  | 0.096696 | 43.82 |
| 600872 | 2015 | 0.18  | 0.09 | 1.28248  | 1.6447553 | 22.23247 | 0.097929 | 18.5  |
| 2249   | 2015 | 0.753 | 0.09 | 1.28248  | 1.6447553 | 22.7522  | 0.096696 | 43.82 |
| 2511   | 2015 | -0.87 | 0.09 | 1.28248  | 1.6447553 | 22.23713 | 0.036236 | 30.06 |
| 2511   | 2015 | -0.87 | 0.09 | 1.28248  | 1.6447553 | 22.23713 | 0.036236 | 30.06 |
| 2616   | 2015 | -0.72 | 0.09 | 1.28248  | 1.6447553 | 21.78944 | 0.06871  | 24.45 |
| 600872 | 2015 | 0.131 | 0.09 | 1.28248  | 1.6447553 | 21.62364 | 0.097929 | 18.5  |
| 2616   | 2015 | -0.84 | 0.09 | 1.28248  | 1.6447553 | 21.45981 | 0.06871  | 24.45 |
| 300359 | 2015 | 0.245 | 0.09 | 1.28248  | 1.6447553 | 21.57717 | 0.057939 | 33.09 |
| 603328 | 2015 | 0.226 | 0.09 | 1.28248  | 1.6447553 | 22.3734  | 0.107327 | 74.18 |
| 2035   | 2015 | -0.76 | 0.09 | 1.28248  | 1.6447553 | 21.74424 | 0.138431 | 17.42 |
| 2035   | 2015 | -0.53 | 0.09 | 1.28248  | 1.6447553 | 21.74424 | 0.138431 | 17.42 |
| 2249   | 2015 | -0.5  | 0.09 | 1.28248  | 1.6447553 | 22.7522  | 0.096696 | 43.82 |
| 2668   | 2015 | -0.29 | 0.09 | 1.28248  | 1.6447553 | 22.18943 | 0.148474 | 20.38 |
| 2668   | 2015 | -0.29 | 0.09 | 1.28248  | 1.6447553 | 22.18943 | 0.148474 | 20.38 |
| 300359 | 2015 | 0.245 | 0.09 | 1.28248  | 1.6447553 | 21.45506 | 0.057939 | 33.09 |
| 2249   | 2015 | -0.5  | 0.09 | 1.28248  | 1.6447553 | 22.7522  | 0.096696 | 43.82 |
| 2035   | 2015 | -0.64 | 0.09 | 1.28248  | 1.6447553 | 21.74424 | 0.138431 | 17.42 |
| 2249   | 2015 | -0.34 | 0.09 | 1.28248  | 1.6447553 | 22.7522  | 0.096696 | 43.82 |
| 600872 | 2015 | 0.031 | 0.09 | 1.28248  | 1.6447553 | 22.23247 | 0.097929 | 18.5  |
| 2249   | 2015 | -0.5  | 0.09 | 1.28248  | 1.6447553 | 22.7522  | 0.096696 | 43.82 |
| 2035   | 2015 | -0.64 | 0.09 | 1.28248  | 1.6447553 | 21.74424 | 0.138431 | 17.42 |
| 2249   | 2015 | -0.28 | 0.09 | 1.28248  | 1.6447553 | 22.7522  | 0.096696 | 43.82 |
| 915    | 2015 | 0.003 | 0.05 | 1.833256 | 3.3608292 | 21.45607 | 0.155679 | 21.55 |
| 915    | 2015 | -0.39 | 0.05 | 1.833256 | 3.3608292 | 20.22168 | 0.155679 | 21.55 |
| 2588   | 2015 | -0.27 | 0.05 | 1.833256 | 3.3608292 | 22.56625 | 0.162467 | 22.66 |
| 915    | 2015 | -0.39 | 0.05 | 1.833256 | 3.3608292 | 21.45607 | 0.155679 | 21.55 |
| 2588   | 2015 | -0.44 | 0.05 | 1.833256 | 3.3608292 | 22.56625 | 0.162467 | 22.66 |
| 2588   | 2015 | -0.44 | 0.05 | 1.833256 | 3.3608292 | 22.56625 | 0.162467 | 22.66 |
| 2470   | 2015 | 0.589 | 0.05 | 1.833256 | 3.3608292 | 23.18678 | 0.136841 | 39.13 |
| 2470   | 2015 | 0.52  | 0.05 | 1.833256 | 3.3608292 | 23.00408 | 0.136841 | 39.13 |
| 2588   | 2015 | 0.427 | 0.05 | 1.833256 | 3.3608292 | 22.56625 | 0.162467 | 22.66 |

|        |      |       |      |          |            |          |          |       |
|--------|------|-------|------|----------|------------|----------|----------|-------|
| 915    | 2015 | -0.54 | 0.05 | 1.833256 | 3.3608292  | 21.45607 | 0.155679 | 21.55 |
| 2588   | 2015 | 0.427 | 0.05 | 1.833256 | 3.3608292  | 22.56625 | 0.162467 | 22.66 |
| 2470   | 2015 | 0.367 | 0.05 | 1.833256 | 3.3608292  | 23.00408 | 0.136841 | 39.13 |
| 2470   | 2015 | 0.18  | 0.05 | 1.833256 | 3.3608292  | 23.00408 | 0.136841 | 39.13 |
| 2588   | 2015 | 0.427 | 0.05 | 1.833256 | 3.3608292  | 22.56625 | 0.162467 | 22.66 |
| 915    | 2015 | -0.26 | 0.05 | 1.833256 | 3.3608292  | 21.45607 | 0.155679 | 21.55 |
| 915    | 2015 | -0.13 | 0.05 | 1.833256 | 3.3608292  | 21.45607 | 0.155679 | 21.55 |
| 2470   | 2015 | 0.589 | 0.05 | 1.833256 | 3.3608292  | 23.00408 | 0.136841 | 39.13 |
| 2470   | 2015 | 0.416 | 0.05 | 1.833256 | 3.3608292  | 23.00408 | 0.136841 | 39.13 |
| 2470   | 2015 | 0.5   | 0.05 | 1.833256 | 3.3608292  | 23.00408 | 0.136841 | 39.13 |
| 2470   | 2015 | 0.589 | 0.05 | 1.833256 | 3.3608292  | 23.00408 | 0.136841 | 39.13 |
| 915    | 2015 | 0.518 | 0.05 | 1.833256 | 3.3608292  | 21.45607 | 0.155679 | 21.55 |
| 915    | 2015 | 0.003 | 0.05 | 1.833256 | 3.3608292  | 21.45607 | 0.155679 | 21.55 |
| 2588   | 2015 | -0.21 | 0.05 | 1.833256 | 3.3608292  | 22.33262 | 0.162467 | 22.66 |
| 2470   | 2015 | 0.5   | 0.05 | 1.833256 | 3.3608292  | 23.00408 | 0.136841 | 39.13 |
| 2588   | 2015 | 0.427 | 0.05 | 1.833256 | 3.3608292  | 22.56625 | 0.162467 | 22.66 |
| 2588   | 2015 | 0.427 | 0.05 | 1.833256 | 3.3608292  | 22.56625 | 0.162467 | 22.66 |
| 2588   | 2015 | -0.2  | 0.05 | 1.833256 | 3.3608292  | 22.56625 | 0.162467 | 22.66 |
| 2588   | 2015 | -0.45 | 0.05 | 1.833256 | 3.3608292  | 22.56625 | 0.162467 | 22.66 |
| 2588   | 2015 | -0.55 | 0.05 | 1.833256 | 3.3608292  | 22.56625 | 0.162467 | 22.66 |
| 2428   | 2015 | 0.682 | 0.01 | 1.257866 | 1.582226   | 21.53015 | 0.037628 | 15.69 |
| 2428   | 2015 | 0.453 | 0.01 | 1.257866 | 1.582226   | 21.43845 | 0.037628 | 15.69 |
| 2428   | 2015 | 0.568 | 0.01 | 1.257866 | 1.582226   | 21.53015 | 0.037628 | 15.69 |
| 2428   | 2015 | 0.427 | 0.01 | 1.257866 | 1.582226   | 21.53015 | 0.037628 | 15.69 |
| 2428   | 2015 | 0.682 | 0.01 | 1.257866 | 1.582226   | 21.53015 | 0.037628 | 15.69 |
| 2428   | 2015 | -0.2  | 0.01 | 1.257866 | 1.582226   | 21.53015 | 0.037628 | 15.69 |
| 2428   | 2015 | 0.358 | 0.01 | 1.257866 | 1.582226   | 21.53015 | 0.037628 | 15.69 |
| 2428   | 2015 | 0.682 | 0.01 | 1.257866 | 1.582226   | 21.53015 | 0.037628 | 15.69 |
| 600303 | 2015 | -0.59 | 0.01 | 0.006384 | 0.00004075 | 22.41468 | 0.0428   | 23.17 |
| 600303 | 2015 | -0.25 | 0.01 | 0.006384 | 0.00004075 | 23.03573 | 0.0428   | 23.17 |
| 600303 | 2015 | -0.59 | 0.01 | 0.006384 | 0.00004075 | 22.41468 | 0.0428   | 23.17 |
| 600303 | 2015 | -0.81 | 0.01 | 0.006384 | 0.00004075 | 22.41468 | 0.0428   | 23.17 |
| 600303 | 2015 | -0.81 | 0.01 | 0.006384 | 0.00004075 | 22.41468 | 0.0428   | 23.17 |
| 600303 | 2015 | -0.23 | 0.01 | 0.006384 | 0.00004075 | 22.41468 | 0.0428   | 23.17 |
| 600303 | 2015 | -0.81 | 0.01 | 0.006384 | 0.00004075 | 22.41468 | 0.0428   | 23.17 |
| 600303 | 2015 | -0.68 | 0.01 | 0.006384 | 0.00004075 | 22.41468 | 0.0428   | 23.17 |
| 600303 | 2015 | -0.07 | 0.01 | 0.006384 | 0.00004075 | 22.41468 | 0.0428   | 23.17 |
| 601216 | 2015 | -0.41 | 0.01 | 1.168994 | 1.3665463  | 23.74257 | 0.067402 | 36.56 |
| 601216 | 2015 | -0.41 | 0.01 | 1.168994 | 1.3665463  | 23.74257 | 0.067402 | 36.56 |
| 601216 | 2015 | -0.16 | 0.01 | 1.168994 | 1.3665463  | 23.74257 | 0.067402 | 36.56 |
| 601216 | 2015 | -0.51 | 0.01 | 1.168994 | 1.3665463  | 23.42016 | 0.067402 | 36.56 |
| 601216 | 2015 | -0.41 | 0.01 | 1.168994 | 1.3665463  | 23.74257 | 0.067402 | 36.56 |
| 2092   | 2015 | -0.56 | 0.05 | 0.926148 | 0.8577501  | 24.33493 | 0.01567  | 24.49 |
| 600337 | 2015 | -0.53 | 0.05 | 0.926148 | 0.8577501  | 22.29589 | 0.098403 | 32.14 |
| 2100   | 2015 | -0.23 | 0.05 | 0.926148 | 0.8577501  | 22.05965 | 0.102638 | 29.47 |
| 600256 | 2015 | -0.67 | 0.05 | 0.926148 | 0.8577501  | 24.43368 | 0.01811  | 42.12 |
| 600888 | 2015 | -0.66 | 0.05 | 0.926148 | 0.8577501  | 22.91563 | 0.007682 | 28.14 |
| 2307   | 2015 | -0.33 | 0.05 | 0.926148 | 0.8577501  | 23.2655  | 0.003553 | 45.75 |
| 2202   | 2015 | -0.22 | 0.05 | 0.926148 | 0.8577501  | 24.68546 | 0.165342 | 18.23 |
| 2205   | 2015 | -0.03 | 0.05 | 0.926148 | 0.8577501  | 21.12246 | -0.06345 | 30.21 |
| 2202   | 2015 | 0.033 | 0.05 | 0.926148 | 0.8577501  | 24.68546 | 0.165342 | 18.23 |
| 300159 | 2015 | 0.135 | 0.05 | 0.926148 | 0.8577501  | 22.74171 | 0.053162 | 17.37 |
| 2205   | 2015 | -0.1  | 0.05 | 0.926148 | 0.8577501  | 21.12246 | -0.06345 | 30.21 |
| 2205   | 2015 | -0.1  | 0.05 | 0.926148 | 0.8577501  | 21.24053 | -0.06345 | 30.21 |

|        |      |       |      |          |           |          |          |       |
|--------|------|-------|------|----------|-----------|----------|----------|-------|
| 2302   | 2015 | -0.42 | 0.05 | 0.926148 | 0.8577501 | 23.25348 | 0.083915 | 36.18 |
| 600256 | 2015 | -0.67 | 0.05 | 0.926148 | 0.8577501 | 23.77535 | 0.01811  | 42.12 |
| 600256 | 2015 | -0.73 | 0.05 | 0.926148 | 0.8577501 | 24.43368 | 0.01811  | 42.12 |
| 877    | 2015 | 0.637 | 0.05 | 0.926148 | 0.8577501 | 23.74517 | -0.09009 | 35.49 |
| 2100   | 2015 | 0.149 | 0.05 | 0.926148 | 0.8577501 | 21.87552 | 0.102638 | 29.47 |
| 2202   | 2015 | 0.033 | 0.05 | 0.926148 | 0.8577501 | 24.68546 | 0.165342 | 18.23 |
| 2202   | 2015 | -0.2  | 0.05 | 0.926148 | 0.8577501 | 24.68546 | 0.165342 | 18.23 |
| 600888 | 2015 | -0.66 | 0.05 | 0.926148 | 0.8577501 | 22.91563 | 0.007682 | 28.14 |
| 877    | 2015 | -0.06 | 0.05 | 0.926148 | 0.8577501 | 23.74517 | -0.09009 | 35.49 |
| 877    | 2015 | 0.637 | 0.05 | 0.926148 | 0.8577501 | 23.74517 | -0.09009 | 35.49 |
| 600256 | 2015 | -0.67 | 0.05 | 0.926148 | 0.8577501 | 24.43368 | 0.01811  | 42.12 |
| 2092   | 2015 | -0.56 | 0.05 | 0.926148 | 0.8577501 | 24.33493 | 0.01567  | 24.49 |
| 300159 | 2015 | -0.5  | 0.05 | 0.926148 | 0.8577501 | 22.46219 | 0.053162 | 17.37 |
| 877    | 2015 | -0.03 | 0.05 | 0.926148 | 0.8577501 | 23.74517 | -0.09009 | 35.49 |
| 600888 | 2015 | -0    | 0.05 | 0.926148 | 0.8577501 | 22.91563 | 0.007682 | 28.14 |
| 600337 | 2015 | -0.67 | 0.05 | 0.926148 | 0.8577501 | 22.41033 | 0.098403 | 32.14 |
| 2302   | 2015 | -0.69 | 0.05 | 0.926148 | 0.8577501 | 22.67402 | 0.083915 | 36.18 |
| 877    | 2015 | 0.637 | 0.05 | 0.926148 | 0.8577501 | 23.22618 | -0.09009 | 35.49 |
| 2302   | 2015 | -0.24 | 0.05 | 0.926148 | 0.8577501 | 23.25348 | 0.083915 | 36.18 |
| 2092   | 2015 | -0.23 | 0.05 | 0.926148 | 0.8577501 | 23.85992 | 0.01567  | 24.49 |
| 2092   | 2015 | -0.56 | 0.05 | 0.926148 | 0.8577501 | 24.33493 | 0.01567  | 24.49 |
| 2302   | 2015 | -0.42 | 0.05 | 0.926148 | 0.8577501 | 23.25348 | 0.083915 | 36.18 |
| 2202   | 2015 | 0.028 | 0.05 | 0.926148 | 0.8577501 | 24.68546 | 0.165342 | 18.23 |
| 600256 | 2015 | -0.73 | 0.05 | 0.926148 | 0.8577501 | 24.43368 | 0.01811  | 42.12 |
| 2092   | 2015 | -0.57 | 0.05 | 0.926148 | 0.8577501 | 24.33493 | 0.01567  | 24.49 |
| 877    | 2015 | -0.03 | 0.05 | 0.926148 | 0.8577501 | 23.74517 | -0.09009 | 35.49 |
| 2092   | 2015 | -0.56 | 0.05 | 0.926148 | 0.8577501 | 24.33493 | 0.01567  | 24.49 |
| 2202   | 2015 | 0.938 | 0.05 | 0.926148 | 0.8577501 | 24.68546 | 0.165342 | 18.23 |
| 300159 | 2015 | -0.5  | 0.05 | 0.926148 | 0.8577501 | 22.74171 | 0.053162 | 17.37 |
| 600256 | 2015 | -0.72 | 0.05 | 0.926148 | 0.8577501 | 24.43368 | 0.01811  | 42.12 |
| 2307   | 2015 | -0.33 | 0.05 | 0.926148 | 0.8577501 | 23.2655  | 0.003553 | 45.75 |
| 2302   | 2015 | -0.3  | 0.05 | 0.926148 | 0.8577501 | 23.25348 | 0.083915 | 36.18 |
| 2302   | 2015 | -0.24 | 0.05 | 0.926148 | 0.8577501 | 23.25348 | 0.083915 | 36.18 |
| 2205   | 2015 | -0.1  | 0.05 | 0.926148 | 0.8577501 | 21.12246 | -0.06345 | 30.21 |
| 2202   | 2015 | 0.148 | 0.05 | 0.926148 | 0.8577501 | 24.68546 | 0.165342 | 18.23 |
| 2205   | 2015 | -0.1  | 0.05 | 0.926148 | 0.8577501 | 21.12246 | -0.06345 | 30.21 |
| 2100   | 2015 | 0.149 | 0.05 | 0.926148 | 0.8577501 | 21.87552 | 0.102638 | 29.47 |
| 600337 | 2015 | -0.67 | 0.05 | 0.926148 | 0.8577501 | 22.29589 | 0.098403 | 32.14 |
| 877    | 2015 | -0.25 | 0.05 | 0.926148 | 0.8577501 | 23.74517 | -0.09009 | 35.49 |
| 2202   | 2015 | 0.173 | 0.05 | 0.926148 | 0.8577501 | 24.68546 | 0.165342 | 18.23 |
| 600337 | 2015 | -0.67 | 0.05 | 0.926148 | 0.8577501 | 22.29589 | 0.098403 | 32.14 |
| 2202   | 2015 | -0.39 | 0.05 | 0.926148 | 0.8577501 | 24.68546 | 0.165342 | 18.23 |
| 2205   | 2015 | 0.205 | 0.05 | 0.926148 | 0.8577501 | 21.12246 | -0.06345 | 30.21 |
| 600337 | 2015 | -0.53 | 0.05 | 0.926148 | 0.8577501 | 22.29589 | 0.098403 | 32.14 |
| 2202   | 2015 | -0.01 | 0.05 | 0.926148 | 0.8577501 | 24.32899 | 0.165342 | 18.23 |
| 600888 | 2015 | -0    | 0.05 | 0.926148 | 0.8577501 | 22.84751 | 0.007682 | 28.14 |
| 2307   | 2015 | -0.33 | 0.05 | 0.926148 | 0.8577501 | 23.2655  | 0.003553 | 45.75 |
| 2307   | 2015 | -0.33 | 0.05 | 0.926148 | 0.8577501 | 22.96799 | 0.003553 | 45.75 |
| 2092   | 2015 | -0.57 | 0.05 | 0.926148 | 0.8577501 | 24.33493 | 0.01567  | 24.49 |
| 2302   | 2015 | -0.26 | 0.05 | 0.926148 | 0.8577501 | 23.25348 | 0.083915 | 36.18 |
| 2202   | 2015 | 0.061 | 0.05 | 0.926148 | 0.8577501 | 24.68546 | 0.165342 | 18.23 |
| 2205   | 2015 | -0.1  | 0.05 | 0.926148 | 0.8577501 | 21.12246 | -0.06345 | 30.21 |
| 2092   | 2015 | -0.5  | 0.05 | 0.926148 | 0.8577501 | 24.33493 | 0.01567  | 24.49 |
| 2302   | 2015 | -0.69 | 0.05 | 0.926148 | 0.8577501 | 23.25348 | 0.083915 | 36.18 |

|        |      |       |      |          |            |          |          |       |
|--------|------|-------|------|----------|------------|----------|----------|-------|
| 2202   | 2015 | 0.069 | 0.05 | 0.926148 | 0.8577501  | 24.68546 | 0.165342 | 18.23 |
| 600888 | 2015 | -0.21 | 0.05 | 0.926148 | 0.8577501  | 22.84751 | 0.007682 | 28.14 |
| 2092   | 2015 | 0.447 | 0.05 | 0.926148 | 0.8577501  | 24.33493 | 0.01567  | 24.49 |
| 2302   | 2015 | -0.69 | 0.05 | 0.926148 | 0.8577501  | 23.25348 | 0.083915 | 36.18 |
| 600337 | 2015 | -0.53 | 0.05 | 0.926148 | 0.8577501  | 22.29589 | 0.098403 | 32.14 |
| 2100   | 2015 | 0.18  | 0.05 | 0.926148 | 0.8577501  | 21.87552 | 0.102638 | 29.47 |
| 2302   | 2015 | 0.295 | 0.05 | 0.926148 | 0.8577501  | 23.25348 | 0.083915 | 36.18 |
| 2092   | 2015 | -0.12 | 0.05 | 0.926148 | 0.8577501  | 24.33493 | 0.01567  | 24.49 |
| 2302   | 2015 | -0.04 | 0.05 | 0.926148 | 0.8577501  | 23.25348 | 0.083915 | 36.18 |
| 2205   | 2015 | -0.1  | 0.05 | 0.926148 | 0.8577501  | 21.12246 | -0.06345 | 30.21 |
| 300159 | 2015 | 0.135 | 0.05 | 0.926148 | 0.8577501  | 22.74171 | 0.053162 | 17.37 |
| 600888 | 2015 | -0.66 | 0.05 | 0.926148 | 0.8577501  | 22.91563 | 0.007682 | 28.14 |
| 2100   | 2015 | 0.18  | 0.05 | 0.926148 | 0.8577501  | 21.87552 | 0.102638 | 29.47 |
| 2307   | 2015 | -0.33 | 0.05 | 0.926148 | 0.8577501  | 23.2655  | 0.003553 | 45.75 |
| 300159 | 2015 | -0.05 | 0.05 | 0.926148 | 0.8577501  | 22.74171 | 0.053162 | 17.37 |
| 2205   | 2015 | 0.205 | 0.05 | 0.926148 | 0.8577501  | 21.12246 | -0.06345 | 30.21 |
| 2205   | 2015 | -0.1  | 0.05 | 0.926148 | 0.8577501  | 21.12246 | -0.06345 | 30.21 |
| 2302   | 2015 | -0.53 | 0.05 | 0.926148 | 0.8577501  | 23.25348 | 0.083915 | 36.18 |
| 2307   | 2015 | -0.33 | 0.05 | 0.926148 | 0.8577501  | 23.2655  | 0.003553 | 45.75 |
| 2302   | 2015 | -0.21 | 0.05 | 0.926148 | 0.8577501  | 23.25348 | 0.083915 | 36.18 |
| 2092   | 2015 | -0.56 | 0.05 | 0.926148 | 0.8577501  | 24.33493 | 0.01567  | 24.49 |
| 603333 | 2015 | -0.44 | 0.04 | 1.28868  | 1.6606951  | 21.28751 | 0.002231 | 62.6  |
| 603333 | 2015 | -0.44 | 0.04 | 1.28868  | 1.6606951  | 21.28751 | 0.002231 | 62.6  |
| 603333 | 2015 | -0.46 | 0.04 | 1.28868  | 1.6606951  | 21.23911 | 0.002231 | 62.6  |
| 603333 | 2015 | -0.65 | 0.04 | 1.28868  | 1.6606951  | 21.28751 | 0.002231 | 62.6  |
| 603333 | 2015 | -0.65 | 0.04 | 1.28868  | 1.6606951  | 21.28751 | 0.002231 | 62.6  |
| 596    | 2015 | -0.4  | 0.09 | 0.241777 | 0.05845605 | 22.5793  | 0.148039 | 53.89 |
| 596    | 2015 | -0.56 | 0.09 | 0.241777 | 0.05845605 | 22.695   | 0.148039 | 53.89 |
| 596    | 2015 | -0.56 | 0.09 | 0.241777 | 0.05845605 | 22.695   | 0.148039 | 53.89 |
| 596    | 2015 | -0.5  | 0.09 | 0.241777 | 0.05845605 | 22.695   | 0.148039 | 53.89 |
| 596    | 2015 | -0.4  | 0.09 | 0.241777 | 0.05845605 | 22.695   | 0.148039 | 53.89 |
| 587    | 2015 | -0.94 | 0.08 | 1.007356 | 1.0147652  | 23.67299 | 0.03834  | 37.04 |
| 587    | 2015 | -0.94 | 0.08 | 1.007356 | 1.0147652  | 23.67299 | 0.03834  | 37.04 |
| 587    | 2015 | -0.94 | 0.08 | 1.007356 | 1.0147652  | 22.79428 | 0.03834  | 37.04 |
| 921    | 2015 | -0.23 | 0.09 | 0.850086 | 0.72264543 | 23.38302 | 0.121658 | 44.93 |
| 2670   | 2015 | -0.12 | 0.09 | 0.850086 | 0.72264543 | 20.76717 | 0.033457 | 29.83 |
| 2076   | 2015 | -0.08 | 0.09 | 0.850086 | 0.72264543 | 21.08245 | 0.051771 | 32.35 |
| 2295   | 2015 | -0.45 | 0.09 | 0.850086 | 0.72264543 | 20.95076 | 0.006039 | 15.4  |
| 2670   | 2015 | -0.38 | 0.09 | 0.850086 | 0.72264543 | 20.76717 | 0.033457 | 29.83 |
| 300173 | 2015 | -0.23 | 0.09 | 0.850086 | 0.72264543 | 21.45041 | 0.046231 | 21.21 |
| 2676   | 2015 | -0.55 | 0.09 | 0.850086 | 0.72264543 | 21.20543 | 0.001583 | 46.56 |
| 2295   | 2015 | -0.45 | 0.09 | 0.850086 | 0.72264543 | 20.95076 | 0.006039 | 15.4  |
| 973    | 2015 | 0.404 | 0.09 | 0.850086 | 0.72264543 | 22.30835 | 0.053555 | 26.01 |
| 2705   | 2015 | -0.69 | 0.09 | 0.850086 | 0.72264543 | 22.20509 | 0.118764 | 46.2  |
| 2705   | 2015 | -0.48 | 0.09 | 0.850086 | 0.72264543 | 22.25575 | 0.118764 | 46.2  |
| 2295   | 2015 | -0.45 | 0.09 | 0.850086 | 0.72264543 | 20.95076 | 0.006039 | 15.4  |
| 2054   | 2015 | -0.01 | 0.09 | 0.850086 | 0.72264543 | 21.63517 | 0.166306 | 21.9  |
| 300173 | 2015 | -0.13 | 0.09 | 0.850086 | 0.72264543 | 21.45041 | 0.046231 | 21.21 |
| 2611   | 2015 | -0.33 | 0.09 | 0.850086 | 0.72264543 | 21.63516 | 0.077337 | 35.65 |
| 600499 | 2015 | -0.33 | 0.09 | 0.850086 | 0.72264543 | 22.85394 | 0.121199 | 15.02 |
| 333    | 2015 | -0.1  | 0.09 | 0.850086 | 0.72264543 | 25.58185 | 0.24316  | 35.07 |
| 333    | 2015 | -0.13 | 0.09 | 0.850086 | 0.72264543 | 25.58185 | 0.24316  | 35.07 |
| 2666   | 2015 | -0.15 | 0.09 | 0.850086 | 0.72264543 | 21.89058 | 0.068398 | 37.54 |
| 2076   | 2015 | -0.3  | 0.09 | 0.850086 | 0.72264543 | 21.08245 | 0.051771 | 32.35 |

|        |      |       |      |          |            |          |          |       |
|--------|------|-------|------|----------|------------|----------|----------|-------|
| 600323 | 2015 | -0.58 | 0.09 | 0.850086 | 0.72264543 | 23.23767 | 0.090692 | 17.98 |
| 967    | 2015 | -0.09 | 0.09 | 0.850086 | 0.72264543 | 22.42027 | 0.031221 | 32.23 |
| 2295   | 2015 | -0.45 | 0.09 | 0.850086 | 0.72264543 | 20.95076 | 0.006039 | 15.4  |
| 2054   | 2015 | 0.476 | 0.09 | 0.850086 | 0.72264543 | 21.63517 | 0.166306 | 21.9  |
| 600499 | 2015 | 0.006 | 0.09 | 0.850086 | 0.72264543 | 22.85394 | 0.121199 | 15.02 |
| 2295   | 2015 | -0.45 | 0.09 | 0.850086 | 0.72264543 | 20.95076 | 0.006039 | 15.4  |
| 333    | 2015 | -0.37 | 0.09 | 0.850086 | 0.72264543 | 25.58185 | 0.24316  | 35.07 |
| 2054   | 2015 | -0.65 | 0.09 | 0.850086 | 0.72264543 | 21.63517 | 0.166306 | 21.9  |
| 2676   | 2015 | -0.73 | 0.09 | 0.850086 | 0.72264543 | 21.20543 | 0.001583 | 46.56 |
| 921    | 2015 | -0.11 | 0.09 | 0.850086 | 0.72264543 | 23.38302 | 0.121658 | 44.93 |
| 921    | 2015 | -0.7  | 0.09 | 0.850086 | 0.72264543 | 23.38302 | 0.121658 | 44.93 |
| 333    | 2015 | -0.1  | 0.09 | 0.850086 | 0.72264543 | 25.58185 | 0.24316  | 35.07 |
| 921    | 2015 | -0.18 | 0.09 | 0.850086 | 0.72264543 | 23.38302 | 0.121658 | 44.93 |
| 300173 | 2015 | -0.23 | 0.09 | 0.850086 | 0.72264543 | 21.45041 | 0.046231 | 21.21 |
| 333    | 2015 | -0.1  | 0.09 | 0.850086 | 0.72264543 | 25.58185 | 0.24316  | 35.07 |
| 921    | 2015 | -0.61 | 0.09 | 0.850086 | 0.72264543 | 23.38302 | 0.121658 | 44.93 |
| 333    | 2015 | -0.1  | 0.09 | 0.850086 | 0.72264543 | 25.58185 | 0.24316  | 35.07 |
| 300173 | 2015 | -0.1  | 0.09 | 0.850086 | 0.72264543 | 21.45041 | 0.046231 | 21.21 |
| 2076   | 2015 | -0.08 | 0.09 | 0.850086 | 0.72264543 | 20.83819 | 0.051771 | 32.35 |
| 2543   | 2015 | -0.34 | 0.09 | 0.850086 | 0.72264543 | 22.17159 | 0.113086 | 38.25 |
| 967    | 2015 | -0.09 | 0.09 | 0.850086 | 0.72264543 | 22.42027 | 0.031221 | 32.23 |
| 2705   | 2015 | 0.606 | 0.09 | 0.850086 | 0.72264543 | 22.25575 | 0.118764 | 46.2  |
| 333    | 2015 | -0.6  | 0.09 | 0.850086 | 0.72264543 | 25.58185 | 0.24316  | 35.07 |
| 333    | 2015 | -0.2  | 0.09 | 0.850086 | 0.72264543 | 25.58185 | 0.24316  | 35.07 |
| 333    | 2015 | -0.05 | 0.09 | 0.850086 | 0.72264543 | 25.58185 | 0.24316  | 35.07 |
| 603288 | 2015 | -0.38 | 0.09 | 0.850086 | 0.72264543 | 23.16544 | 0.286778 | 58.13 |
| 2054   | 2015 | 0.476 | 0.09 | 0.850086 | 0.72264543 | 21.63517 | 0.166306 | 21.9  |
| 2054   | 2015 | 0.335 | 0.09 | 0.850086 | 0.72264543 | 21.63517 | 0.166306 | 21.9  |
| 2054   | 2015 | 0.165 | 0.09 | 0.850086 | 0.72264543 | 21.63517 | 0.166306 | 21.9  |
| 2054   | 2015 | -0.21 | 0.09 | 0.850086 | 0.72264543 | 21.63517 | 0.166306 | 21.9  |
| 333    | 2015 | -0.24 | 0.09 | 0.850086 | 0.72264543 | 25.58185 | 0.24316  | 35.07 |
| 333    | 2015 | -0.1  | 0.09 | 0.850086 | 0.72264543 | 25.58185 | 0.24316  | 35.07 |
| 2611   | 2015 | -0.46 | 0.09 | 0.850086 | 0.72264543 | 21.05687 | 0.077337 | 35.65 |
| 300173 | 2015 | -0.39 | 0.09 | 0.850086 | 0.72264543 | 21.30668 | 0.046231 | 21.21 |
| 973    | 2015 | -0.2  | 0.09 | 0.850086 | 0.72264543 | 22.30835 | 0.053555 | 26.01 |
| 2054   | 2015 | 0.476 | 0.09 | 0.850086 | 0.72264543 | 21.63517 | 0.166306 | 21.9  |
| 2260   | 2015 | 0.252 | 0.09 | 0.850086 | 0.72264543 | 20.57415 | -0.06512 | 24.66 |
| 973    | 2015 | 0.404 | 0.09 | 0.850086 | 0.72264543 | 22.30835 | 0.053555 | 26.01 |
| 2054   | 2015 | 0.132 | 0.09 | 0.850086 | 0.72264543 | 21.49507 | 0.166306 | 21.9  |
| 2054   | 2015 | 0.476 | 0.09 | 0.850086 | 0.72264543 | 21.63517 | 0.166306 | 21.9  |
| 973    | 2015 | 0.177 | 0.09 | 0.850086 | 0.72264543 | 22.30835 | 0.053555 | 26.01 |
| 921    | 2015 | -0.23 | 0.09 | 0.850086 | 0.72264543 | 23.38302 | 0.121658 | 44.93 |
| 2291   | 2015 | -0.25 | 0.09 | 0.850086 | 0.72264543 | 21.8619  | 0.013117 | 36.74 |
| 333    | 2015 | -0.32 | 0.09 | 0.850086 | 0.72264543 | 25.58185 | 0.24316  | 35.07 |
| 2705   | 2015 | -0.39 | 0.09 | 0.850086 | 0.72264543 | 22.25575 | 0.118764 | 46.2  |
| 2449   | 2015 | -0.44 | 0.09 | 0.850086 | 0.72264543 | 22.20311 | 0.05233  | 12.9  |
| 600499 | 2015 | -0.09 | 0.09 | 0.850086 | 0.72264543 | 22.85394 | 0.121199 | 15.02 |
| 300173 | 2015 | -0.05 | 0.09 | 0.850086 | 0.72264543 | 21.45041 | 0.046231 | 21.21 |
| 2260   | 2015 | 0.252 | 0.09 | 0.850086 | 0.72264543 | 20.63942 | -0.06512 | 24.66 |
| 2260   | 2015 | 0.252 | 0.09 | 0.850086 | 0.72264543 | 20.57415 | -0.06512 | 24.66 |
| 2543   | 2015 | -0.42 | 0.09 | 0.850086 | 0.72264543 | 22.17159 | 0.113086 | 38.25 |
| 2543   | 2015 | -0.47 | 0.09 | 0.850086 | 0.72264543 | 22.17159 | 0.113086 | 38.25 |
| 967    | 2015 | -0.09 | 0.09 | 0.850086 | 0.72264543 | 22.42027 | 0.031221 | 32.23 |
| 333    | 2015 | -0.1  | 0.09 | 0.850086 | 0.72264543 | 25.58185 | 0.24316  | 35.07 |

|        |      |       |      |          |            |          |          |       |
|--------|------|-------|------|----------|------------|----------|----------|-------|
| 533    | 2015 | -0.62 | 0.09 | 0.850086 | 0.72264543 | 22.15005 | 0.081181 | 24.97 |
| 333    | 2015 | -0.1  | 0.09 | 0.850086 | 0.72264543 | 25.58185 | 0.24316  | 35.07 |
| 973    | 2015 | -0.18 | 0.09 | 0.850086 | 0.72264543 | 22.06581 | 0.053555 | 26.01 |
| 2446   | 2015 | -0.37 | 0.09 | 0.850086 | 0.72264543 | 21.80007 | 0.052713 | 18    |
| 333    | 2015 | -0.1  | 0.09 | 0.850086 | 0.72264543 | 25.58185 | 0.24316  | 35.07 |
| 333    | 2015 | -0.1  | 0.09 | 0.850086 | 0.72264543 | 25.58185 | 0.24316  | 35.07 |
| 333    | 2015 | -0.34 | 0.09 | 0.850086 | 0.72264543 | 25.58185 | 0.24316  | 35.07 |
| 921    | 2015 | -0.19 | 0.09 | 0.850086 | 0.72264543 | 23.38302 | 0.121658 | 44.93 |
| 600499 | 2015 | -0.32 | 0.09 | 0.850086 | 0.72264543 | 22.85394 | 0.121199 | 15.02 |
| 600323 | 2015 | -0.58 | 0.09 | 0.850086 | 0.72264543 | 23.23767 | 0.090692 | 17.98 |
| 921    | 2015 | -0.84 | 0.09 | 0.850086 | 0.72264543 | 23.38302 | 0.121658 | 44.93 |
| 333    | 2015 | -0.1  | 0.09 | 0.850086 | 0.72264543 | 25.58185 | 0.24316  | 35.07 |
| 533    | 2015 | 0.019 | 0.09 | 0.850086 | 0.72264543 | 21.10394 | 0.081181 | 24.97 |
| 973    | 2015 | -0.2  | 0.09 | 0.850086 | 0.72264543 | 22.30835 | 0.053555 | 26.01 |
| 973    | 2015 | -0.18 | 0.09 | 0.850086 | 0.72264543 | 22.30835 | 0.053555 | 26.01 |
| 2295   | 2015 | -0.45 | 0.09 | 0.850086 | 0.72264543 | 20.95076 | 0.006039 | 15.4  |
| 2446   | 2015 | 0.119 | 0.09 | 0.850086 | 0.72264543 | 21.80007 | 0.052713 | 18    |
| 300004 | 2015 | -0.07 | 0.09 | 0.850086 | 0.72264543 | 22.0433  | 0.013063 | 12.37 |
| 603288 | 2015 | -0.26 | 0.09 | 0.850086 | 0.72264543 | 23.16544 | 0.286778 | 58.13 |
| 967    | 2015 | -0.53 | 0.09 | 0.850086 | 0.72264543 | 22.42027 | 0.031221 | 32.23 |
| 921    | 2015 | -0.65 | 0.09 | 0.850086 | 0.72264543 | 23.38302 | 0.121658 | 44.93 |
| 2295   | 2015 | -0.45 | 0.09 | 0.850086 | 0.72264543 | 20.95076 | 0.006039 | 15.4  |
| 333    | 2015 | -0.34 | 0.09 | 0.850086 | 0.72264543 | 25.58185 | 0.24316  | 35.07 |
| 333    | 2015 | -0.36 | 0.09 | 0.850086 | 0.72264543 | 25.58185 | 0.24316  | 35.07 |
| 600499 | 2015 | -0.09 | 0.09 | 0.850086 | 0.72264543 | 22.85394 | 0.121199 | 15.02 |
| 2543   | 2015 | -0.51 | 0.09 | 0.850086 | 0.72264543 | 22.17159 | 0.113086 | 38.25 |
| 600499 | 2015 | -0.16 | 0.09 | 0.850086 | 0.72264543 | 22.85394 | 0.121199 | 15.02 |
| 2446   | 2015 | -0.23 | 0.09 | 0.850086 | 0.72264543 | 21.80007 | 0.052713 | 18    |
| 2076   | 2015 | -0.3  | 0.09 | 0.850086 | 0.72264543 | 21.08245 | 0.051771 | 32.35 |
| 300173 | 2015 | 0.345 | 0.09 | 0.850086 | 0.72264543 | 21.45041 | 0.046231 | 21.21 |
| 2705   | 2015 | -0.69 | 0.09 | 0.850086 | 0.72264543 | 22.25575 | 0.118764 | 46.2  |
| 2666   | 2015 | -0.15 | 0.09 | 0.850086 | 0.72264543 | 21.89058 | 0.068398 | 37.54 |
| 921    | 2015 | -0.38 | 0.09 | 0.850086 | 0.72264543 | 23.38302 | 0.121658 | 44.93 |
| 600499 | 2015 | 0.006 | 0.09 | 0.850086 | 0.72264543 | 22.85394 | 0.121199 | 15.02 |
| 541    | 2015 | -0.57 | 0.09 | 0.850086 | 0.72264543 | 22.52304 | 0.007451 | 13.47 |
| 973    | 2015 | -0.2  | 0.09 | 0.850086 | 0.72264543 | 22.30835 | 0.053555 | 26.01 |
| 541    | 2015 | -0.6  | 0.09 | 0.850086 | 0.72264543 | 22.52304 | 0.007451 | 13.47 |
| 973    | 2015 | 0.404 | 0.09 | 0.850086 | 0.72264543 | 22.30835 | 0.053555 | 26.01 |
| 967    | 2015 | -0.66 | 0.09 | 0.850086 | 0.72264543 | 22.42027 | 0.031221 | 32.23 |
| 333    | 2015 | -0.1  | 0.09 | 0.850086 | 0.72264543 | 25.58185 | 0.24316  | 35.07 |
| 600499 | 2015 | 0.006 | 0.09 | 0.850086 | 0.72264543 | 22.85394 | 0.121199 | 15.02 |
| 2446   | 2015 | -0.51 | 0.09 | 0.850086 | 0.72264543 | 21.66695 | 0.052713 | 18    |
| 603288 | 2015 | -0.32 | 0.09 | 0.850086 | 0.72264543 | 23.16544 | 0.286778 | 58.13 |
| 2260   | 2015 | 0.252 | 0.09 | 0.850086 | 0.72264543 | 20.57415 | -0.06512 | 24.66 |
| 333    | 2015 | -0.29 | 0.09 | 0.850086 | 0.72264543 | 25.58185 | 0.24316  | 35.07 |
| 2666   | 2015 | -0.14 | 0.09 | 0.850086 | 0.72264543 | 21.89058 | 0.068398 | 37.54 |
| 600499 | 2015 | 0.177 | 0.09 | 0.850086 | 0.72264543 | 22.85394 | 0.121199 | 15.02 |
| 603288 | 2015 | -0.26 | 0.09 | 0.850086 | 0.72264543 | 23.16544 | 0.286778 | 58.13 |
| 333    | 2015 | -0.42 | 0.09 | 0.850086 | 0.72264543 | 25.58185 | 0.24316  | 35.07 |
| 333    | 2015 | -0.65 | 0.09 | 0.850086 | 0.72264543 | 25.58185 | 0.24316  | 35.07 |
| 333    | 2015 | -0.65 | 0.09 | 0.850086 | 0.72264543 | 25.58185 | 0.24316  | 35.07 |
| 533    | 2015 | -0.45 | 0.09 | 0.850086 | 0.72264543 | 22.15005 | 0.081181 | 24.97 |
| 333    | 2015 | -0.1  | 0.09 | 0.850086 | 0.72264543 | 25.58185 | 0.24316  | 35.07 |
| 333    | 2015 | -0.38 | 0.09 | 0.850086 | 0.72264543 | 25.58185 | 0.24316  | 35.07 |

|        |      |       |      |          |            |          |          |       |
|--------|------|-------|------|----------|------------|----------|----------|-------|
| 2676   | 2015 | -0.73 | 0.09 | 0.850086 | 0.72264543 | 21.20543 | 0.001583 | 46.56 |
| 333    | 2015 | -0.21 | 0.09 | 0.850086 | 0.72264543 | 25.58185 | 0.24316  | 35.07 |
| 967    | 2015 | -0.66 | 0.09 | 0.850086 | 0.72264543 | 22.0696  | 0.031221 | 32.23 |
| 600499 | 2015 | -0.22 | 0.09 | 0.850086 | 0.72264543 | 22.85394 | 0.121199 | 15.02 |
| 921    | 2015 | -0.7  | 0.09 | 0.850086 | 0.72264543 | 23.38302 | 0.121658 | 44.93 |
| 333    | 2015 | -0.57 | 0.09 | 0.850086 | 0.72264543 | 25.58185 | 0.24316  | 35.07 |
| 333    | 2015 | -0.1  | 0.09 | 0.850086 | 0.72264543 | 25.58185 | 0.24316  | 35.07 |
| 2076   | 2015 | -0.16 | 0.09 | 0.850086 | 0.72264543 | 21.08245 | 0.051771 | 32.35 |
| 967    | 2015 | -0.39 | 0.09 | 0.850086 | 0.72264543 | 22.42027 | 0.031221 | 32.23 |
| 333    | 2015 | 0.284 | 0.09 | 0.850086 | 0.72264543 | 25.58185 | 0.24316  | 35.07 |
| 2611   | 2015 | -0.33 | 0.09 | 0.850086 | 0.72264543 | 21.63516 | 0.077337 | 35.65 |
| 333    | 2015 | -0.27 | 0.09 | 0.850086 | 0.72264543 | 25.58185 | 0.24316  | 35.07 |
| 603288 | 2015 | -0.3  | 0.09 | 0.850086 | 0.72264543 | 23.16544 | 0.286778 | 58.13 |
| 2676   | 2015 | -0.5  | 0.09 | 0.850086 | 0.72264543 | 21.20543 | 0.001583 | 46.56 |
| 2054   | 2015 | 0.476 | 0.09 | 0.850086 | 0.72264543 | 21.63517 | 0.166306 | 21.9  |
| 2543   | 2015 | 0.036 | 0.09 | 0.850086 | 0.72264543 | 21.88919 | 0.113086 | 38.25 |
| 2676   | 2015 | -0.73 | 0.09 | 0.850086 | 0.72264543 | 21.20543 | 0.001583 | 46.56 |
| 533    | 2015 | -0.35 | 0.09 | 0.850086 | 0.72264543 | 22.15005 | 0.081181 | 24.97 |
| 2295   | 2015 | -0.45 | 0.09 | 0.850086 | 0.72264543 | 20.95076 | 0.006039 | 15.4  |
| 2611   | 2015 | -0.49 | 0.09 | 0.850086 | 0.72264543 | 21.63516 | 0.077337 | 35.65 |
| 333    | 2015 | -0.1  | 0.09 | 0.850086 | 0.72264543 | 25.58185 | 0.24316  | 35.07 |
| 600499 | 2015 | 0.006 | 0.09 | 0.850086 | 0.72264543 | 22.85394 | 0.121199 | 15.02 |
| 2054   | 2015 | 0.384 | 0.09 | 0.850086 | 0.72264543 | 21.63517 | 0.166306 | 21.9  |
| 921    | 2015 | -0.23 | 0.09 | 0.850086 | 0.72264543 | 23.38302 | 0.121658 | 44.93 |
| 603288 | 2015 | -0.5  | 0.09 | 0.850086 | 0.72264543 | 23.16544 | 0.286778 | 58.13 |
| 2670   | 2015 | -0.38 | 0.09 | 0.850086 | 0.72264543 | 20.6226  | 0.033457 | 29.83 |
| 333    | 2015 | -0.65 | 0.09 | 0.850086 | 0.72264543 | 25.58185 | 0.24316  | 35.07 |
| 2446   | 2015 | -0.03 | 0.09 | 0.850086 | 0.72264543 | 21.80007 | 0.052713 | 18    |
| 333    | 2015 | -0.1  | 0.09 | 0.850086 | 0.72264543 | 25.58185 | 0.24316  | 35.07 |
| 921    | 2015 | -0.25 | 0.09 | 0.850086 | 0.72264543 | 23.38302 | 0.121658 | 44.93 |
| 967    | 2015 | -0.09 | 0.09 | 0.850086 | 0.72264543 | 22.42027 | 0.031221 | 32.23 |
| 300004 | 2015 | 0.148 | 0.09 | 0.850086 | 0.72264543 | 22.0433  | 0.013063 | 12.37 |
| 533    | 2015 | -0.38 | 0.09 | 0.850086 | 0.72264543 | 22.15005 | 0.081181 | 24.97 |
| 333    | 2015 | -0.65 | 0.09 | 0.850086 | 0.72264543 | 25.58185 | 0.24316  | 35.07 |
| 333    | 2015 | 0.039 | 0.09 | 0.850086 | 0.72264543 | 25.58185 | 0.24316  | 35.07 |
| 541    | 2015 | -0.13 | 0.09 | 0.850086 | 0.72264543 | 22.52304 | 0.007451 | 13.47 |
| 300004 | 2015 | -0.07 | 0.09 | 0.850086 | 0.72264543 | 22.0433  | 0.013063 | 12.37 |
| 541    | 2015 | -0.6  | 0.09 | 0.850086 | 0.72264543 | 22.52437 | 0.007451 | 13.47 |
| 2676   | 2015 | -0.73 | 0.09 | 0.850086 | 0.72264543 | 21.20543 | 0.001583 | 46.56 |
| 600499 | 2015 | -0.34 | 0.09 | 0.850086 | 0.72264543 | 22.85394 | 0.121199 | 15.02 |
| 2076   | 2015 | -0.23 | 0.09 | 0.850086 | 0.72264543 | 21.08245 | 0.051771 | 32.35 |
| 300004 | 2015 | -0.07 | 0.09 | 0.850086 | 0.72264543 | 22.0433  | 0.013063 | 12.37 |
| 2670   | 2015 | -0.29 | 0.09 | 0.850086 | 0.72264543 | 20.76717 | 0.033457 | 29.83 |
| 2705   | 2015 | -0.51 | 0.09 | 0.850086 | 0.72264543 | 22.25575 | 0.118764 | 46.2  |
| 300004 | 2015 | -0.07 | 0.09 | 0.850086 | 0.72264543 | 22.0433  | 0.013063 | 12.37 |
| 967    | 2015 | -0.09 | 0.09 | 0.850086 | 0.72264543 | 22.42027 | 0.031221 | 32.23 |
| 2666   | 2015 | 0.558 | 0.09 | 0.850086 | 0.72264543 | 21.89058 | 0.068398 | 37.54 |
| 2076   | 2015 | -0.14 | 0.09 | 0.850086 | 0.72264543 | 21.08245 | 0.051771 | 32.35 |
| 300004 | 2015 | -0.09 | 0.09 | 0.850086 | 0.72264543 | 22.0433  | 0.013063 | 12.37 |
| 333    | 2015 | -0.21 | 0.09 | 0.850086 | 0.72264543 | 25.58185 | 0.24316  | 35.07 |
| 600499 | 2015 | 0.006 | 0.09 | 0.850086 | 0.72264543 | 22.85394 | 0.121199 | 15.02 |
| 973    | 2015 | 0.404 | 0.09 | 0.850086 | 0.72264543 | 22.30835 | 0.053555 | 26.01 |
| 2054   | 2015 | -0.32 | 0.09 | 0.850086 | 0.72264543 | 21.63517 | 0.166306 | 21.9  |
| 921    | 2015 | -0.38 | 0.09 | 0.850086 | 0.72264543 | 23.38302 | 0.121658 | 44.93 |



|        |      |       |      |          |            |          |          |       |
|--------|------|-------|------|----------|------------|----------|----------|-------|
| 2446   | 2015 | -0.1  | 0.09 | 0.850086 | 0.72264543 | 21.80007 | 0.052713 | 18    |
| 2260   | 2015 | 0.252 | 0.09 | 0.850086 | 0.72264543 | 20.57415 | -0.06512 | 24.66 |
| 2666   | 2015 | -0.15 | 0.09 | 0.850086 | 0.72264543 | 21.55442 | 0.068398 | 37.54 |
| 600499 | 2015 | 0.144 | 0.09 | 0.850086 | 0.72264543 | 22.85394 | 0.121199 | 15.02 |
| 300173 | 2015 | 0.103 | 0.09 | 0.850086 | 0.72264543 | 21.45041 | 0.046231 | 21.21 |
| 2291   | 2015 | -0.25 | 0.09 | 0.850086 | 0.72264543 | 21.83103 | 0.013117 | 36.74 |
| 921    | 2015 | -0.41 | 0.09 | 0.850086 | 0.72264543 | 22.68037 | 0.121658 | 44.93 |
| 333    | 2015 | -0.09 | 0.09 | 0.850086 | 0.72264543 | 24.95951 | 0.24316  | 35.07 |
| 600499 | 2015 | -0.22 | 0.09 | 0.850086 | 0.72264543 | 22.85394 | 0.121199 | 15.02 |
| 2054   | 2015 | 0.476 | 0.09 | 0.850086 | 0.72264543 | 21.63517 | 0.166306 | 21.9  |
| 2666   | 2015 | -0.63 | 0.09 | 0.850086 | 0.72264543 | 21.89058 | 0.068398 | 37.54 |
| 333    | 2015 | -0.65 | 0.09 | 0.850086 | 0.72264543 | 25.58185 | 0.24316  | 35.07 |
| 2705   | 2015 | 0.053 | 0.09 | 0.850086 | 0.72264543 | 22.25575 | 0.118764 | 46.2  |
| 2611   | 2015 | -0.33 | 0.09 | 0.850086 | 0.72264543 | 21.63516 | 0.077337 | 35.65 |
| 600323 | 2015 | -0.58 | 0.09 | 0.850086 | 0.72264543 | 23.23767 | 0.090692 | 17.98 |
| 300004 | 2015 | -0.09 | 0.09 | 0.850086 | 0.72264543 | 22.0433  | 0.013063 | 12.37 |
| 2670   | 2015 | 0.137 | 0.09 | 0.850086 | 0.72264543 | 20.76717 | 0.033457 | 29.83 |
| 2670   | 2015 | -0.07 | 0.09 | 0.850086 | 0.72264543 | 20.76717 | 0.033457 | 29.83 |
| 967    | 2015 | -0.39 | 0.09 | 0.850086 | 0.72264543 | 22.42027 | 0.031221 | 32.23 |
| 2705   | 2015 | -0.48 | 0.09 | 0.850086 | 0.72264543 | 22.25575 | 0.118764 | 46.2  |
| 600499 | 2015 | -0.18 | 0.09 | 0.850086 | 0.72264543 | 22.85394 | 0.121199 | 15.02 |
| 333    | 2015 | -0.02 | 0.09 | 0.850086 | 0.72264543 | 25.58185 | 0.24316  | 35.07 |
| 2291   | 2015 | -0.25 | 0.09 | 0.850086 | 0.72264543 | 21.83103 | 0.013117 | 36.74 |
| 333    | 2015 | -0.1  | 0.09 | 0.850086 | 0.72264543 | 25.58185 | 0.24316  | 35.07 |
| 333    | 2015 | -0.51 | 0.09 | 0.850086 | 0.72264543 | 25.58185 | 0.24316  | 35.07 |
| 2449   | 2015 | 0.491 | 0.09 | 0.850086 | 0.72264543 | 22.09131 | 0.05233  | 12.9  |
| 2449   | 2015 | 0.491 | 0.09 | 0.850086 | 0.72264543 | 22.20311 | 0.05233  | 12.9  |
| 2449   | 2015 | -0.44 | 0.09 | 0.850086 | 0.72264543 | 22.20311 | 0.05233  | 12.9  |
| 2446   | 2015 | -0.03 | 0.09 | 0.850086 | 0.72264543 | 21.80007 | 0.052713 | 18    |
| 2449   | 2015 | -0.22 | 0.09 | 0.850086 | 0.72264543 | 22.20311 | 0.05233  | 12.9  |
| 300004 | 2015 | 0.015 | 0.09 | 0.850086 | 0.72264543 | 21.90927 | 0.013063 | 12.37 |
| 333    | 2015 | -0.1  | 0.09 | 0.850086 | 0.72264543 | 25.58185 | 0.24316  | 35.07 |
| 600323 | 2015 | -0.58 | 0.09 | 0.850086 | 0.72264543 | 22.74934 | 0.090692 | 17.98 |
| 333    | 2015 | -0.1  | 0.09 | 0.850086 | 0.72264543 | 25.58185 | 0.24316  | 35.07 |
| 2260   | 2015 | 0.252 | 0.09 | 0.850086 | 0.72264543 | 20.57415 | -0.06512 | 24.66 |
| 600499 | 2015 | -0.22 | 0.09 | 0.850086 | 0.72264543 | 22.85394 | 0.121199 | 15.02 |
| 921    | 2015 | 0.483 | 0.09 | 0.850086 | 0.72264543 | 23.38302 | 0.121658 | 44.93 |
| 973    | 2015 | 0.404 | 0.09 | 0.850086 | 0.72264543 | 22.30835 | 0.053555 | 26.01 |
| 2054   | 2015 | 0.476 | 0.09 | 0.850086 | 0.72264543 | 21.63517 | 0.166306 | 21.9  |
| 2543   | 2015 | -0.36 | 0.09 | 0.850086 | 0.72264543 | 22.17159 | 0.113086 | 38.25 |
| 921    | 2015 | -0.3  | 0.09 | 0.850086 | 0.72264543 | 23.38302 | 0.121658 | 44.93 |
| 2291   | 2015 | -0.25 | 0.09 | 0.850086 | 0.72264543 | 21.83103 | 0.013117 | 36.74 |
| 333    | 2015 | -0.22 | 0.09 | 0.850086 | 0.72264543 | 25.58185 | 0.24316  | 35.07 |
| 300173 | 2015 | -0.06 | 0.09 | 0.850086 | 0.72264543 | 21.45041 | 0.046231 | 21.21 |
| 2676   | 2015 | 0.248 | 0.09 | 0.850086 | 0.72264543 | 21.20543 | 0.001583 | 46.56 |
| 533    | 2015 | -0.38 | 0.09 | 0.850086 | 0.72264543 | 22.15005 | 0.081181 | 24.97 |
| 333    | 2015 | -0.28 | 0.09 | 0.850086 | 0.72264543 | 25.58185 | 0.24316  | 35.07 |
| 333    | 2015 | -0.35 | 0.09 | 0.850086 | 0.72264543 | 25.58185 | 0.24316  | 35.07 |
| 600499 | 2015 | -0.28 | 0.09 | 0.850086 | 0.72264543 | 22.85394 | 0.121199 | 15.02 |
| 333    | 2015 | -0.39 | 0.09 | 0.850086 | 0.72264543 | 25.58185 | 0.24316  | 35.07 |
| 603288 | 2015 | -0.24 | 0.09 | 0.850086 | 0.72264543 | 23.11463 | 0.286778 | 58.13 |
| 921    | 2015 | -0.19 | 0.09 | 0.850086 | 0.72264543 | 23.38302 | 0.121658 | 44.93 |
| 333    | 2015 | -0.1  | 0.09 | 0.850086 | 0.72264543 | 25.58185 | 0.24316  | 35.07 |
| 2676   | 2015 | 0.591 | 0.09 | 0.850086 | 0.72264543 | 21.15278 | 0.001583 | 46.56 |

|        |      |       |      |          |            |          |          |       |
|--------|------|-------|------|----------|------------|----------|----------|-------|
| 973    | 2015 | 0.404 | 0.09 | 0.850086 | 0.72264543 | 22.30835 | 0.053555 | 26.01 |
| 2295   | 2015 | -0.45 | 0.09 | 0.850086 | 0.72264543 | 20.78802 | 0.006039 | 15.4  |
| 2676   | 2015 | -0.52 | 0.09 | 0.850086 | 0.72264543 | 21.20543 | 0.001583 | 46.56 |
| 2611   | 2015 | -0.66 | 0.09 | 0.850086 | 0.72264543 | 21.63516 | 0.077337 | 35.65 |
| 600499 | 2015 | -0.2  | 0.09 | 0.850086 | 0.72264543 | 22.85394 | 0.121199 | 15.02 |
| 2676   | 2015 | -0.1  | 0.09 | 0.850086 | 0.72264543 | 21.20543 | 0.001583 | 46.56 |
| 2666   | 2015 | -0.15 | 0.09 | 0.850086 | 0.72264543 | 21.89058 | 0.068398 | 37.54 |
| 921    | 2015 | -0.54 | 0.09 | 0.850086 | 0.72264543 | 23.38302 | 0.121658 | 44.93 |
| 973    | 2015 | 0.404 | 0.09 | 0.850086 | 0.72264543 | 22.30835 | 0.053555 | 26.01 |
| 600499 | 2015 | 0.006 | 0.09 | 0.850086 | 0.72264543 | 22.3976  | 0.121199 | 15.02 |
| 333    | 2015 | -0.65 | 0.09 | 0.850086 | 0.72264543 | 25.58185 | 0.24316  | 35.07 |
| 2543   | 2015 | -0.63 | 0.09 | 0.850086 | 0.72264543 | 22.17159 | 0.113086 | 38.25 |
| 333    | 2015 | -0.26 | 0.09 | 0.850086 | 0.72264543 | 25.58185 | 0.24316  | 35.07 |
| 2705   | 2015 | -0.69 | 0.09 | 0.850086 | 0.72264543 | 22.25575 | 0.118764 | 46.2  |
| 2543   | 2015 | -0.34 | 0.09 | 0.850086 | 0.72264543 | 22.17159 | 0.113086 | 38.25 |
| 533    | 2015 | -0.38 | 0.09 | 0.850086 | 0.72264543 | 22.15005 | 0.081181 | 24.97 |
| 2611   | 2015 | -0.42 | 0.09 | 0.850086 | 0.72264543 | 21.63516 | 0.077337 | 35.65 |
| 2291   | 2015 | -0.25 | 0.09 | 0.850086 | 0.72264543 | 21.83103 | 0.013117 | 36.74 |
| 2543   | 2015 | 0.012 | 0.09 | 0.850086 | 0.72264543 | 22.17159 | 0.113086 | 38.25 |
| 300173 | 2015 | 0.934 | 0.09 | 0.850086 | 0.72264543 | 21.45041 | 0.046231 | 21.21 |
| 541    | 2015 | -0.13 | 0.09 | 0.850086 | 0.72264543 | 22.52304 | 0.007451 | 13.47 |
| 921    | 2015 | -0.23 | 0.09 | 0.850086 | 0.72264543 | 23.38302 | 0.121658 | 44.93 |
| 600323 | 2015 | -0.58 | 0.09 | 0.850086 | 0.72264543 | 23.23767 | 0.090692 | 17.98 |
| 2076   | 2015 | -0.17 | 0.09 | 0.850086 | 0.72264543 | 21.08245 | 0.051771 | 32.35 |
| 2666   | 2015 | -0.09 | 0.09 | 0.850086 | 0.72264543 | 21.89058 | 0.068398 | 37.54 |
| 600323 | 2015 | -0.58 | 0.09 | 0.850086 | 0.72264543 | 23.23767 | 0.090692 | 17.98 |
| 922    | 2015 | -0.57 | 0.08 | 1.300537 | 1.6913968  | 21.90118 | -0.13292 | 24.12 |
| 922    | 2015 | -0.48 | 0.08 | 1.300537 | 1.6913968  | 21.64534 | -0.13292 | 24.12 |
| 922    | 2015 | -0.48 | 0.08 | 1.300537 | 1.6913968  | 21.90118 | -0.13292 | 24.12 |
| 922    | 2015 | -0.41 | 0.08 | 1.300537 | 1.6913968  | 21.90118 | -0.13292 | 24.12 |
| 600482 | 2015 | -0.22 | 0.02 | 1.411311 | 1.9917976  | 22.19388 | 0.077456 | 30.52 |
| 600550 | 2015 | -0.16 | 0.02 | 1.411311 | 1.9917976  | 22.80805 | 0.17944  | 33.47 |
| 600550 | 2015 | -0.32 | 0.02 | 1.411311 | 1.9917976  | 22.80805 | 0.17944  | 33.47 |
| 300152 | 2015 | -0.28 | 0.02 | 1.411311 | 1.9917976  | 21.89844 | 0.002009 | 32.41 |
| 600480 | 2015 | -0.34 | 0.02 | 1.411311 | 1.9917976  | 22.90765 | 0.069509 | 33.96 |
| 687    | 2015 | 0.07  | 0.02 | 1.411311 | 1.9917976  | 21.68929 | -0.23969 | 29.8  |
| 600135 | 2015 | 0.003 | 0.02 | 1.411311 | 1.9917976  | 21.37257 | 0.024669 | 34.07 |
| 687    | 2015 | 0.237 | 0.02 | 1.411311 | 1.9917976  | 21.32269 | -0.23969 | 29.8  |
| 600135 | 2015 | 0.003 | 0.02 | 1.411311 | 1.9917976  | 21.28312 | 0.024669 | 34.07 |
| 601633 | 2015 | -0.06 | 0.02 | 1.411311 | 1.9917976  | 24.99869 | 0.209977 | 56.04 |
| 600550 | 2015 | -0.34 | 0.02 | 1.411311 | 1.9917976  | 22.80805 | 0.17944  | 33.47 |
| 600480 | 2015 | -0.39 | 0.02 | 1.411311 | 1.9917976  | 22.90765 | 0.069509 | 33.96 |
| 300152 | 2015 | -0.52 | 0.02 | 1.411311 | 1.9917976  | 21.52255 | 0.002009 | 32.41 |
| 601633 | 2015 | 0.118 | 0.02 | 1.411311 | 1.9917976  | 24.99869 | 0.209977 | 56.04 |
| 600480 | 2015 | -0.64 | 0.02 | 1.411311 | 1.9917976  | 22.90765 | 0.069509 | 33.96 |
| 300152 | 2015 | -0.6  | 0.02 | 1.411311 | 1.9917976  | 21.89844 | 0.002009 | 32.41 |
| 300152 | 2015 | -0.6  | 0.02 | 1.411311 | 1.9917976  | 21.89844 | 0.002009 | 32.41 |
| 300152 | 2015 | -0.28 | 0.02 | 1.411311 | 1.9917976  | 21.89844 | 0.002009 | 32.41 |
| 600550 | 2015 | -0.3  | 0.02 | 1.411311 | 1.9917976  | 22.80805 | 0.17944  | 33.47 |
| 600480 | 2015 | -0.31 | 0.02 | 1.411311 | 1.9917976  | 22.90765 | 0.069509 | 33.96 |
| 600480 | 2015 | -0.32 | 0.02 | 1.411311 | 1.9917976  | 22.90765 | 0.069509 | 33.96 |
| 600480 | 2015 | -0.51 | 0.02 | 1.411311 | 1.9917976  | 22.90765 | 0.069509 | 33.96 |
| 600550 | 2015 | -0.5  | 0.02 | 1.411311 | 1.9917976  | 22.80805 | 0.17944  | 33.47 |
| 601633 | 2015 | -0.16 | 0.02 | 1.411311 | 1.9917976  | 24.99869 | 0.209977 | 56.04 |

|        |      |       |      |          |           |          |          |       |
|--------|------|-------|------|----------|-----------|----------|----------|-------|
| 600550 | 2015 | -0.03 | 0.02 | 1.411311 | 1.9917976 | 22.80805 | 0.17944  | 33.47 |
| 600550 | 2015 | -0.3  | 0.02 | 1.411311 | 1.9917976 | 22.80805 | 0.17944  | 33.47 |
| 300152 | 2015 | -0.28 | 0.02 | 1.411311 | 1.9917976 | 21.89844 | 0.002009 | 32.41 |
| 600480 | 2015 | 0.025 | 0.02 | 1.411311 | 1.9917976 | 22.90765 | 0.069509 | 33.96 |
| 600480 | 2015 | 0.025 | 0.02 | 1.411311 | 1.9917976 | 22.90765 | 0.069509 | 33.96 |
| 601633 | 2015 | 0.118 | 0.02 | 1.411311 | 1.9917976 | 24.99869 | 0.209977 | 56.04 |
| 600135 | 2015 | 0.003 | 0.02 | 1.411311 | 1.9917976 | 21.37257 | 0.024669 | 34.07 |
| 300152 | 2015 | -0.15 | 0.02 | 1.411311 | 1.9917976 | 21.89844 | 0.002009 | 32.41 |
| 600480 | 2015 | -0.64 | 0.02 | 1.411311 | 1.9917976 | 22.90765 | 0.069509 | 33.96 |
| 600550 | 2015 | -0.3  | 0.02 | 1.411311 | 1.9917976 | 22.80805 | 0.17944  | 33.47 |
| 600482 | 2015 | -0.38 | 0.02 | 1.411311 | 1.9917976 | 22.19388 | 0.077456 | 30.52 |
| 2342   | 2015 | -0.72 | 0.02 | 1.411311 | 1.9917976 | 22.0788  | 0.011266 | 20.03 |
| 600480 | 2015 | -0.31 | 0.02 | 1.411311 | 1.9917976 | 22.90765 | 0.069509 | 33.96 |
| 600482 | 2015 | -0.3  | 0.02 | 1.411311 | 1.9917976 | 22.19388 | 0.077456 | 30.52 |
| 600550 | 2015 | -0.19 | 0.02 | 1.411311 | 1.9917976 | 22.65581 | 0.17944  | 33.47 |
| 600480 | 2015 | -0.24 | 0.02 | 1.411311 | 1.9917976 | 22.90765 | 0.069509 | 33.96 |
| 600480 | 2015 | -0.64 | 0.02 | 1.411311 | 1.9917976 | 22.90765 | 0.069509 | 33.96 |
| 687    | 2015 | 0.561 | 0.02 | 1.411311 | 1.9917976 | 21.68929 | -0.23969 | 29.8  |
| 2342   | 2015 | -0.4  | 0.02 | 1.411311 | 1.9917976 | 22.0788  | 0.011266 | 20.03 |
| 600482 | 2015 | -0.3  | 0.02 | 1.411311 | 1.9917976 | 22.19388 | 0.077456 | 30.52 |
| 600550 | 2015 | -0.33 | 0.02 | 1.411311 | 1.9917976 | 22.80805 | 0.17944  | 33.47 |
| 300152 | 2015 | -0.28 | 0.02 | 1.411311 | 1.9917976 | 21.89844 | 0.002009 | 32.41 |
| 600480 | 2015 | -0.55 | 0.02 | 1.411311 | 1.9917976 | 22.90765 | 0.069509 | 33.96 |
| 687    | 2015 | 0.07  | 0.02 | 1.411311 | 1.9917976 | 21.68929 | -0.23969 | 29.8  |
| 687    | 2015 | -0.42 | 0.02 | 1.411311 | 1.9917976 | 21.68929 | -0.23969 | 29.8  |
| 687    | 2015 | 0.904 | 0.02 | 1.411311 | 1.9917976 | 21.68929 | -0.23969 | 29.8  |
| 600480 | 2015 | -0.64 | 0.02 | 1.411311 | 1.9917976 | 22.90765 | 0.069509 | 33.96 |
| 600480 | 2015 | -0.55 | 0.02 | 1.411311 | 1.9917976 | 22.90765 | 0.069509 | 33.96 |
| 600480 | 2015 | -0.64 | 0.02 | 1.411311 | 1.9917976 | 22.90765 | 0.069509 | 33.96 |
| 687    | 2015 | 0.904 | 0.02 | 1.411311 | 1.9917976 | 21.68929 | -0.23969 | 29.8  |
| 600480 | 2015 | -0.56 | 0.02 | 1.411311 | 1.9917976 | 22.90765 | 0.069509 | 33.96 |
| 600550 | 2015 | -0.04 | 0.02 | 1.411311 | 1.9917976 | 22.80805 | 0.17944  | 33.47 |
| 600480 | 2015 | 0.025 | 0.02 | 1.411311 | 1.9917976 | 22.90765 | 0.069509 | 33.96 |
| 600480 | 2015 | -0.45 | 0.02 | 1.411311 | 1.9917976 | 22.90765 | 0.069509 | 33.96 |
| 601633 | 2015 | 0.118 | 0.02 | 1.411311 | 1.9917976 | 24.89443 | 0.209977 | 56.04 |
| 600480 | 2015 | -0.22 | 0.02 | 1.411311 | 1.9917976 | 22.90765 | 0.069509 | 33.96 |
| 600480 | 2015 | -0.31 | 0.02 | 1.411311 | 1.9917976 | 22.90765 | 0.069509 | 33.96 |
| 600480 | 2015 | -0.64 | 0.02 | 1.411311 | 1.9917976 | 22.90765 | 0.069509 | 33.96 |
| 600482 | 2015 | -0.3  | 0.02 | 1.411311 | 1.9917976 | 22.19388 | 0.077456 | 30.52 |
| 601633 | 2015 | -0.43 | 0.02 | 1.411311 | 1.9917976 | 24.99869 | 0.209977 | 56.04 |
| 600482 | 2015 | -0.22 | 0.02 | 1.411311 | 1.9917976 | 22.24166 | 0.077456 | 30.52 |
| 601633 | 2015 | -0.19 | 0.02 | 1.411311 | 1.9917976 | 24.99869 | 0.209977 | 56.04 |
| 601633 | 2015 | 0.118 | 0.02 | 1.411311 | 1.9917976 | 24.99869 | 0.209977 | 56.04 |
| 2342   | 2015 | -0.4  | 0.02 | 1.411311 | 1.9917976 | 22.0788  | 0.011266 | 20.03 |
| 600135 | 2015 | 0.003 | 0.02 | 1.411311 | 1.9917976 | 21.37257 | 0.024669 | 34.07 |
| 300152 | 2015 | -0.47 | 0.02 | 1.411311 | 1.9917976 | 21.89844 | 0.002009 | 32.41 |
| 600482 | 2015 | -0.3  | 0.02 | 1.411311 | 1.9917976 | 22.19388 | 0.077456 | 30.52 |
| 600135 | 2015 | 0.003 | 0.02 | 1.411311 | 1.9917976 | 21.37257 | 0.024669 | 34.07 |
| 2342   | 2015 | -0.72 | 0.02 | 1.411311 | 1.9917976 | 22.08667 | 0.011266 | 20.03 |
| 600550 | 2015 | -0.3  | 0.02 | 1.411311 | 1.9917976 | 22.80805 | 0.17944  | 33.47 |
| 600480 | 2015 | -0.37 | 0.02 | 1.411311 | 1.9917976 | 22.90765 | 0.069509 | 33.96 |
| 600480 | 2015 | -0.32 | 0.02 | 1.411311 | 1.9917976 | 22.90765 | 0.069509 | 33.96 |
| 600550 | 2015 | -0.63 | 0.02 | 1.411311 | 1.9917976 | 22.80805 | 0.17944  | 33.47 |
| 600480 | 2015 | 0.025 | 0.02 | 1.411311 | 1.9917976 | 22.90765 | 0.069509 | 33.96 |

|        |      |       |      |          |            |          |          |       |
|--------|------|-------|------|----------|------------|----------|----------|-------|
| 600480 | 2015 | -0.42 | 0.02 | 1.411311 | 1.9917976  | 22.15776 | 0.069509 | 33.96 |
| 2342   | 2015 | -0.41 | 0.02 | 1.411311 | 1.9917976  | 22.0788  | 0.011266 | 20.03 |
| 600482 | 2015 | -0.38 | 0.02 | 1.411311 | 1.9917976  | 22.19388 | 0.077456 | 30.52 |
| 600135 | 2015 | 0.003 | 0.02 | 1.411311 | 1.9917976  | 21.37257 | 0.024669 | 34.07 |
| 601633 | 2015 | -0.43 | 0.02 | 1.411311 | 1.9917976  | 24.99869 | 0.209977 | 56.04 |
| 600480 | 2015 | -0.04 | 0.02 | 1.411311 | 1.9917976  | 22.90765 | 0.069509 | 33.96 |
| 600550 | 2015 | -0.34 | 0.02 | 1.411311 | 1.9917976  | 22.80805 | 0.17944  | 33.47 |
| 600550 | 2015 | -0.22 | 0.02 | 1.411311 | 1.9917976  | 22.80805 | 0.17944  | 33.47 |
| 600480 | 2015 | -0.64 | 0.02 | 1.411311 | 1.9917976  | 22.90765 | 0.069509 | 33.96 |
| 600480 | 2015 | -0.46 | 0.02 | 1.411311 | 1.9917976  | 22.90765 | 0.069509 | 33.96 |
| 600550 | 2015 | -0.42 | 0.02 | 1.411311 | 1.9917976  | 22.80805 | 0.17944  | 33.47 |
| 600550 | 2015 | -0.42 | 0.02 | 1.411311 | 1.9917976  | 22.80805 | 0.17944  | 33.47 |
| 600285 | 2015 | -0.07 | 0.07 | 0.254736 | 0.06489044 | 21.71971 | 0.077553 | 14.92 |
| 600285 | 2015 | -0.07 | 0.07 | 0.254736 | 0.06489044 | 21.71971 | 0.077553 | 14.92 |
| 600285 | 2015 | -0.07 | 0.07 | 0.254736 | 0.06489044 | 21.71971 | 0.077553 | 14.92 |
| 2321   | 2015 | -0.89 | 0.07 | 0.254736 | 0.06489044 | 22.32538 | 0.011293 | 19.74 |
| 2321   | 2015 | -0.89 | 0.07 | 0.254736 | 0.06489044 | 22.32538 | 0.011293 | 19.74 |
| 2321   | 2015 | -0.89 | 0.07 | 0.254736 | 0.06489044 | 22.32538 | 0.011293 | 19.74 |
| 600285 | 2015 | -0.07 | 0.07 | 0.254736 | 0.06489044 | 21.71971 | 0.077553 | 14.92 |
| 2321   | 2015 | -0.89 | 0.07 | 0.254736 | 0.06489044 | 22.32538 | 0.011293 | 19.74 |
| 600285 | 2015 | -0.07 | 0.07 | 0.254736 | 0.06489044 | 21.71971 | 0.077553 | 14.92 |
| 2321   | 2015 | -0.89 | 0.07 | 0.254736 | 0.06489044 | 22.32538 | 0.011293 | 19.74 |
| 2321   | 2015 | -0.89 | 0.07 | 0.254736 | 0.06489044 | 22.19593 | 0.011293 | 19.74 |
| 600285 | 2015 | -0.07 | 0.07 | 0.254736 | 0.06489044 | 21.69188 | 0.077553 | 14.92 |
| 600496 | 2015 | 0.019 | 0.09 | 1.014861 | 1.0299429  | 23.06927 | 0.05413  | 24.17 |
| 600496 | 2015 | -0.23 | 0.09 | 1.014861 | 1.0299429  | 23.06927 | 0.05413  | 24.17 |
| 600496 | 2015 | -0.22 | 0.09 | 1.014861 | 1.0299429  | 22.27804 | 0.05413  | 24.17 |
| 600496 | 2015 | -0.23 | 0.09 | 1.014861 | 1.0299429  | 23.06927 | 0.05413  | 24.17 |
| 600496 | 2015 | 0.019 | 0.09 | 1.014861 | 1.0299429  | 23.06927 | 0.05413  | 24.17 |
| 600496 | 2015 | -0.2  | 0.09 | 1.014861 | 1.0299429  | 23.06927 | 0.05413  | 24.17 |
| 600496 | 2015 | 0.24  | 0.09 | 1.014861 | 1.0299429  | 23.06927 | 0.05413  | 24.17 |
| 600496 | 2015 | -0.23 | 0.09 | 1.014861 | 1.0299429  | 23.06927 | 0.05413  | 24.17 |
| 600496 | 2015 | -0.23 | 0.09 | 1.014861 | 1.0299429  | 23.06927 | 0.05413  | 24.17 |
| 600496 | 2015 | -0.42 | 0.09 | 1.014861 | 1.0299429  | 23.06927 | 0.05413  | 24.17 |
| 600496 | 2015 | -0.2  | 0.09 | 1.014861 | 1.0299429  | 23.06927 | 0.05413  | 24.17 |
| 600496 | 2015 | -0.38 | 0.09 | 1.014861 | 1.0299429  | 23.06927 | 0.05413  | 24.17 |
| 600496 | 2015 | -0.13 | 0.09 | 1.014861 | 1.0299429  | 23.06927 | 0.05413  | 24.17 |
| 600496 | 2015 | -0.32 | 0.09 | 1.014861 | 1.0299429  | 23.06927 | 0.05413  | 24.17 |
| 600496 | 2015 | -0.31 | 0.09 | 1.014861 | 1.0299429  | 23.06927 | 0.05413  | 24.17 |
| 600496 | 2015 | -0.23 | 0.09 | 1.014861 | 1.0299429  | 23.06927 | 0.05413  | 24.17 |
| 600496 | 2015 | -0.22 | 0.09 | 1.014861 | 1.0299429  | 23.06927 | 0.05413  | 24.17 |
| 600496 | 2015 | -0.29 | 0.09 | 1.014861 | 1.0299429  | 23.06927 | 0.05413  | 24.17 |
| 601798 | 2015 | 0.07  | 0.04 | 0.006384 | 0.00004075 | 21.77009 | 0.023042 | 58.39 |
| 600516 | 2015 | -0.51 | 0.04 | 0.006384 | 0.00004075 | 22.92234 | 0.002157 | 42.51 |
| 300084 | 2015 | 0.062 | 0.04 | 0.006384 | 0.00004075 | 21.24692 | 0.010614 | 19.98 |
| 600516 | 2015 | -0.51 | 0.04 | 0.006384 | 0.00004075 | 22.92234 | 0.002157 | 42.51 |
| 600516 | 2015 | -0.67 | 0.04 | 0.006384 | 0.00004075 | 22.92234 | 0.002157 | 42.51 |
| 600516 | 2015 | -0.63 | 0.04 | 0.006384 | 0.00004075 | 22.92234 | 0.002157 | 42.51 |
| 601798 | 2015 | 0.293 | 0.04 | 0.006384 | 0.00004075 | 21.77009 | 0.023042 | 58.39 |
| 600192 | 2015 | -0.63 | 0.04 | 0.006384 | 0.00004075 | 22.26334 | 0.023137 | 34.35 |
| 601798 | 2015 | 0.07  | 0.04 | 0.006384 | 0.00004075 | 21.77009 | 0.023042 | 58.39 |
| 601798 | 2015 | 0.288 | 0.04 | 0.006384 | 0.00004075 | 21.77009 | 0.023042 | 58.39 |
| 603169 | 2015 | -0.29 | 0.04 | 0.006384 | 0.00004075 | 22.7826  | 0.207013 | 57.7  |
| 600192 | 2015 | -0.5  | 0.04 | 0.006384 | 0.00004075 | 22.26334 | 0.023137 | 34.35 |

|        |      |       |      |          |            |          |          |       |
|--------|------|-------|------|----------|------------|----------|----------|-------|
| 600108 | 2015 | -0.93 | 0.04 | 0.006384 | 0.00004075 | 22.75396 | 0.025832 | 15.57 |
| 601798 | 2015 | 0.305 | 0.04 | 0.006384 | 0.00004075 | 21.77009 | 0.023042 | 58.39 |
| 600516 | 2015 | -0.51 | 0.04 | 0.006384 | 0.00004075 | 22.92234 | 0.002157 | 42.51 |
| 601798 | 2015 | 0.272 | 0.04 | 0.006384 | 0.00004075 | 21.77009 | 0.023042 | 58.39 |
| 300084 | 2015 | -0.11 | 0.04 | 0.006384 | 0.00004075 | 21.24692 | 0.010614 | 19.98 |
| 300084 | 2015 | 0.062 | 0.04 | 0.006384 | 0.00004075 | 21.24692 | 0.010614 | 19.98 |
| 300084 | 2015 | -0.28 | 0.04 | 0.006384 | 0.00004075 | 21.24692 | 0.010614 | 19.98 |
| 600108 | 2015 | -0.93 | 0.04 | 0.006384 | 0.00004075 | 22.75396 | 0.025832 | 15.57 |
| 603169 | 2015 | -0.79 | 0.04 | 0.006384 | 0.00004075 | 22.7826  | 0.207013 | 57.7  |
| 600516 | 2015 | -0.6  | 0.04 | 0.006384 | 0.00004075 | 22.92234 | 0.002157 | 42.51 |
| 603169 | 2015 | -0.29 | 0.04 | 0.006384 | 0.00004075 | 22.7826  | 0.207013 | 57.7  |
| 600192 | 2015 | -0.63 | 0.04 | 0.006384 | 0.00004075 | 22.26334 | 0.023137 | 34.35 |
| 600192 | 2015 | -0.5  | 0.04 | 0.006384 | 0.00004075 | 22.26334 | 0.023137 | 34.35 |
| 601798 | 2015 | 0.07  | 0.04 | 0.006384 | 0.00004075 | 21.77009 | 0.023042 | 58.39 |
| 600192 | 2015 | -0.63 | 0.04 | 0.006384 | 0.00004075 | 22.26334 | 0.023137 | 34.35 |
| 603169 | 2015 | -0.79 | 0.04 | 0.006384 | 0.00004075 | 22.7826  | 0.207013 | 57.7  |
| 603169 | 2015 | -0.58 | 0.04 | 0.006384 | 0.00004075 | 22.7826  | 0.207013 | 57.7  |
| 601798 | 2015 | 0.07  | 0.04 | 0.006384 | 0.00004075 | 21.64122 | 0.023042 | 58.39 |
| 300084 | 2015 | -0.6  | 0.04 | 0.006384 | 0.00004075 | 21.24692 | 0.010614 | 19.98 |
| 600192 | 2015 | -0.17 | 0.04 | 0.006384 | 0.00004075 | 22.26334 | 0.023137 | 34.35 |
| 300084 | 2015 | 0.054 | 0.04 | 0.006384 | 0.00004075 | 20.9421  | 0.010614 | 19.98 |
| 601798 | 2015 | 0.161 | 0.04 | 0.006384 | 0.00004075 | 21.77009 | 0.023042 | 58.39 |
| 603169 | 2015 | -0.41 | 0.04 | 0.006384 | 0.00004075 | 22.7826  | 0.207013 | 57.7  |
| 600192 | 2015 | -0.63 | 0.04 | 0.006384 | 0.00004075 | 22.26334 | 0.023137 | 34.35 |
| 600516 | 2015 | -0.61 | 0.04 | 0.006384 | 0.00004075 | 22.74308 | 0.002157 | 42.51 |
| 600192 | 2015 | -0.42 | 0.04 | 0.006384 | 0.00004075 | 21.46381 | 0.023137 | 34.35 |
| 600192 | 2015 | -0.42 | 0.04 | 0.006384 | 0.00004075 | 22.26334 | 0.023137 | 34.35 |
| 603169 | 2015 | -0.39 | 0.04 | 0.006384 | 0.00004075 | 22.59901 | 0.207013 | 57.7  |
| 300084 | 2015 | -0.17 | 0.04 | 0.006384 | 0.00004075 | 21.24692 | 0.010614 | 19.98 |
| 600108 | 2015 | -0.93 | 0.04 | 0.006384 | 0.00004075 | 22.64579 | 0.025832 | 15.57 |
| 603169 | 2015 | -0.58 | 0.04 | 0.006384 | 0.00004075 | 22.7826  | 0.207013 | 57.7  |
| 600192 | 2015 | -0.36 | 0.04 | 0.006384 | 0.00004075 | 22.26334 | 0.023137 | 34.35 |
| 757    | 2015 | -0.8  | 0.04 | 1.768291 | 3.1268533  | 20.10336 | 0.027506 | 30.74 |
| 757    | 2015 | -0.8  | 0.04 | 1.768291 | 3.1268533  | 20.60973 | 0.027506 | 30.74 |
| 757    | 2015 | -0.8  | 0.04 | 1.768291 | 3.1268533  | 20.60973 | 0.027506 | 30.74 |
| 600262 | 2015 | -0.19 | 0.01 | 0.006384 | 0.00004075 | 21.72157 | -0.26489 | 32.26 |
| 600111 | 2015 | -0.38 | 0.01 | 0.006384 | 0.00004075 | 23.40001 | 0.005818 | 38.92 |
| 600010 | 2015 | -0.39 | 0.01 | 0.006384 | 0.00004075 | 25.69953 | -0.06981 | 54.66 |
| 600111 | 2015 | 0.25  | 0.01 | 0.006384 | 0.00004075 | 23.40001 | 0.005818 | 38.92 |
| 600010 | 2015 | -0.39 | 0.01 | 0.006384 | 0.00004075 | 25.69306 | -0.06981 | 54.66 |
| 600111 | 2015 | -0.85 | 0.01 | 0.006384 | 0.00004075 | 23.40001 | 0.005818 | 38.92 |
| 600111 | 2015 | 0.021 | 0.01 | 0.006384 | 0.00004075 | 23.40001 | 0.005818 | 38.92 |
| 600111 | 2015 | -0.4  | 0.01 | 0.006384 | 0.00004075 | 23.40001 | 0.005818 | 38.92 |
| 600111 | 2015 | 0.25  | 0.01 | 0.006384 | 0.00004075 | 23.40001 | 0.005818 | 38.92 |
| 600111 | 2015 | 0.25  | 0.01 | 0.006384 | 0.00004075 | 23.40001 | 0.005818 | 38.92 |
| 600262 | 2015 | -0.19 | 0.01 | 0.006384 | 0.00004075 | 21.72157 | -0.26489 | 32.26 |
| 600111 | 2015 | -0.85 | 0.01 | 0.006384 | 0.00004075 | 23.40001 | 0.005818 | 38.92 |
| 600111 | 2015 | -0.53 | 0.01 | 0.006384 | 0.00004075 | 23.40001 | 0.005818 | 38.92 |
| 300239 | 2015 | -0.63 | 0.01 | 0.006384 | 0.00004075 | 20.47486 | 0.008336 | 32.36 |
| 600967 | 2015 | -0.56 | 0.01 | 0.006384 | 0.00004075 | 21.90081 | -0.01913 | 23.62 |
| 300239 | 2015 | -0.63 | 0.01 | 0.006384 | 0.00004075 | 20.47486 | 0.008336 | 32.36 |
| 600111 | 2015 | -0.21 | 0.01 | 0.006384 | 0.00004075 | 23.40001 | 0.005818 | 38.92 |
| 600111 | 2015 | 0.479 | 0.01 | 0.006384 | 0.00004075 | 23.40001 | 0.005818 | 38.92 |
| 600111 | 2015 | -0.62 | 0.01 | 0.006384 | 0.00004075 | 23.40001 | 0.005818 | 38.92 |

|        |      |       |      |          |            |          |          |       |
|--------|------|-------|------|----------|------------|----------|----------|-------|
| 600010 | 2015 | -0.39 | 0.01 | 0.006384 | 0.00004075 | 25.69953 | -0.06981 | 54.66 |
| 600262 | 2015 | -0.19 | 0.01 | 0.006384 | 0.00004075 | 21.72157 | -0.26489 | 32.26 |
| 600262 | 2015 | -0.19 | 0.01 | 0.006384 | 0.00004075 | 21.64991 | -0.26489 | 32.26 |
| 600262 | 2015 | -0.19 | 0.01 | 0.006384 | 0.00004075 | 21.72157 | -0.26489 | 32.26 |
| 600967 | 2015 | -0.56 | 0.01 | 0.006384 | 0.00004075 | 21.90081 | -0.01913 | 23.62 |
| 600111 | 2015 | 0.25  | 0.01 | 0.006384 | 0.00004075 | 23.40001 | 0.005818 | 38.92 |
| 600967 | 2015 | -0.56 | 0.01 | 0.006384 | 0.00004075 | 21.68722 | -0.01913 | 23.62 |
| 300239 | 2015 | -0.63 | 0.01 | 0.006384 | 0.00004075 | 20.49193 | 0.008336 | 32.36 |
| 600111 | 2015 | -0.53 | 0.01 | 0.006384 | 0.00004075 | 23.40001 | 0.005818 | 38.92 |
| 600111 | 2015 | 0.479 | 0.01 | 0.006384 | 0.00004075 | 23.40001 | 0.005818 | 38.92 |
| 600111 | 2015 | -0.85 | 0.01 | 0.006384 | 0.00004075 | 23.40001 | 0.005818 | 38.92 |
| 600967 | 2015 | -0.56 | 0.01 | 0.006384 | 0.00004075 | 21.90081 | -0.01913 | 23.62 |
| 600010 | 2015 | -0.39 | 0.01 | 0.006384 | 0.00004075 | 25.69953 | -0.06981 | 54.66 |
| 600111 | 2015 | -0.85 | 0.01 | 0.006384 | 0.00004075 | 23.40001 | 0.005818 | 38.92 |
| 600111 | 2015 | 0.25  | 0.01 | 0.006384 | 0.00004075 | 23.18038 | 0.005818 | 38.92 |
| 600111 | 2015 | -0.85 | 0.01 | 0.006384 | 0.00004075 | 23.40001 | 0.005818 | 38.92 |
| 600111 | 2015 | -0.85 | 0.01 | 0.006384 | 0.00004075 | 23.40001 | 0.005818 | 38.92 |
| 600111 | 2015 | 0.25  | 0.01 | 0.006384 | 0.00004075 | 23.40001 | 0.005818 | 38.92 |
| 600111 | 2015 | 0.25  | 0.01 | 0.006384 | 0.00004075 | 23.40001 | 0.005818 | 38.92 |
| 600010 | 2015 | -0.39 | 0.01 | 0.006384 | 0.00004075 | 25.69953 | -0.06981 | 54.66 |
| 600967 | 2015 | -0.56 | 0.01 | 0.006384 | 0.00004075 | 21.90081 | -0.01913 | 23.62 |
| 600111 | 2015 | 0.25  | 0.01 | 0.006384 | 0.00004075 | 23.40001 | 0.005818 | 38.92 |
| 600111 | 2015 | 0.25  | 0.01 | 0.006384 | 0.00004075 | 23.40001 | 0.005818 | 38.92 |
| 806    | 2015 | 0.032 | 0.1  | 0.983238 | 0.9667579  | 21.31664 | 0.049608 | 45.94 |
| 600538 | 2015 | 0.365 | 0.1  | 0.983238 | 0.9667579  | 20.70716 | 0.011181 | 26.46 |
| 806    | 2015 | 0.032 | 0.1  | 0.983238 | 0.9667579  | 21.71646 | 0.049608 | 45.94 |
| 806    | 2015 | -0.63 | 0.1  | 0.983238 | 0.9667579  | 21.71646 | 0.049608 | 45.94 |
| 806    | 2015 | 0.032 | 0.1  | 0.983238 | 0.9667579  | 21.71646 | 0.049608 | 45.94 |
| 600538 | 2015 | 0.365 | 0.1  | 0.983238 | 0.9667579  | 20.3973  | 0.011181 | 26.46 |
| 806    | 2015 | -0.31 | 0.1  | 0.983238 | 0.9667579  | 21.71646 | 0.049608 | 45.94 |
| 806    | 2015 | 0.032 | 0.1  | 0.983238 | 0.9667579  | 21.71646 | 0.049608 | 45.94 |
| 806    | 2015 | -0.45 | 0.1  | 0.983238 | 0.9667579  | 21.71646 | 0.049608 | 45.94 |
| 600538 | 2015 | 0.365 | 0.1  | 0.983238 | 0.9667579  | 20.70716 | 0.011181 | 26.46 |
| 806    | 2015 | -0.45 | 0.1  | 0.983238 | 0.9667579  | 21.71646 | 0.049608 | 45.94 |
| 300278 | 2015 | -0.45 | 0.12 | 1.323473 | 1.7515809  | 21.28425 | 0.068195 | 40.15 |
| 300278 | 2015 | -0.4  | 0.12 | 1.323473 | 1.7515809  | 21.90175 | 0.068195 | 40.15 |
| 300278 | 2015 | -0.65 | 0.12 | 1.323473 | 1.7515809  | 21.90175 | 0.068195 | 40.15 |
| 300278 | 2015 | -0.31 | 0.12 | 1.323473 | 1.7515809  | 21.90175 | 0.068195 | 40.15 |
| 300278 | 2015 | -0.31 | 0.12 | 1.323473 | 1.7515809  | 21.90175 | 0.068195 | 40.15 |
| 300278 | 2015 | -0.51 | 0.12 | 1.323473 | 1.7515809  | 21.90175 | 0.068195 | 40.15 |
| 300278 | 2015 | -0.51 | 0.12 | 1.323473 | 1.7515809  | 21.90175 | 0.068195 | 40.15 |
| 300278 | 2015 | -0.12 | 0.12 | 1.323473 | 1.7515809  | 21.90175 | 0.068195 | 40.15 |
| 600562 | 2015 | 0.523 | 0.09 | 0.915281 | 0.83773862 | 20.76261 | 0.182119 | 27.39 |
| 300402 | 2015 | -0.27 | 0.09 | 0.915281 | 0.83773862 | 21.14242 | 0.005985 | 57.52 |
| 300284 | 2015 | 0.179 | 0.09 | 0.915281 | 0.83773862 | 22.05255 | 0.1209   | 21.9  |
| 600775 | 2015 | 0.118 | 0.09 | 0.915281 | 0.83773862 | 21.899   | 0.05466  | 26.42 |
| 300339 | 2015 | -0.34 | 0.09 | 0.915281 | 0.83773862 | 22.12169 | 0.059886 | 17.46 |
| 600268 | 2015 | -0.22 | 0.09 | 0.915281 | 0.83773862 | 23.12305 | 0.057259 | 50.26 |
| 603111 | 2015 | 0.056 | 0.09 | 0.915281 | 0.83773862 | 21.65479 | 0.167985 | 11.52 |
| 600282 | 2015 | -0.02 | 0.09 | 0.915281 | 0.83773862 | 24.0978  | -0.38491 | 45.31 |
| 2182   | 2015 | -0.37 | 0.09 | 0.915281 | 0.83773862 | 21.7978  | 0.021109 | 30.18 |
| 525    | 2015 | 0.67  | 0.09 | 0.915281 | 0.83773862 | 22.83059 | 0.033392 | 44.75 |
| 600562 | 2015 | 0.098 | 0.09 | 0.915281 | 0.83773862 | 21.31363 | 0.182119 | 27.39 |
| 600268 | 2015 | -0.12 | 0.09 | 0.915281 | 0.83773862 | 23.12305 | 0.057259 | 50.26 |

|        |      |       |      |          |            |          |          |       |
|--------|------|-------|------|----------|------------|----------|----------|-------|
| 600268 | 2015 | -0.06 | 0.09 | 0.915281 | 0.83773862 | 23.12305 | 0.057259 | 50.26 |
| 600282 | 2015 | -0.08 | 0.09 | 0.915281 | 0.83773862 | 24.31628 | -0.38491 | 45.31 |
| 300284 | 2015 | 0.089 | 0.09 | 0.915281 | 0.83773862 | 22.41809 | 0.1209   | 21.9  |
| 2090   | 2015 | 1.091 | 0.09 | 0.915281 | 0.83773862 | 21.11953 | 0.114743 | 37.7  |
| 727    | 2015 | 0.195 | 0.09 | 0.915281 | 0.83773862 | 23.11294 | 0.000951 | 24.51 |
| 2024   | 2015 | 0.362 | 0.09 | 0.915281 | 0.83773862 | 25.21406 | 0.023735 | 26.44 |
| 600501 | 2015 | -0.15 | 0.09 | 0.915281 | 0.83773862 | 22.28004 | 0.015416 | 25.2  |
| 300284 | 2015 | -0.33 | 0.09 | 0.915281 | 0.83773862 | 22.41809 | 0.1209   | 21.9  |
| 2546   | 2015 | 0.307 | 0.09 | 0.915281 | 0.83773862 | 21.33759 | 0.110518 | 49.48 |
| 600282 | 2015 | -0.73 | 0.09 | 0.915281 | 0.83773862 | 24.31628 | -0.38491 | 45.31 |
| 600282 | 2015 | -0.73 | 0.09 | 0.915281 | 0.83773862 | 24.31628 | -0.38491 | 45.31 |
| 600406 | 2015 | 0.588 | 0.09 | 0.915281 | 0.83773862 | 23.51439 | 0.16259  | 41.01 |
| 600775 | 2015 | 0.118 | 0.09 | 0.915281 | 0.83773862 | 21.899   | 0.05466  | 26.42 |
| 2090   | 2015 | 1.091 | 0.09 | 0.915281 | 0.83773862 | 21.11953 | 0.114743 | 37.7  |
| 600562 | 2015 | 0.248 | 0.09 | 0.915281 | 0.83773862 | 21.31363 | 0.182119 | 27.39 |
| 2090   | 2015 | 0.419 | 0.09 | 0.915281 | 0.83773862 | 21.11953 | 0.114743 | 37.7  |
| 603518 | 2015 | -0.74 | 0.09 | 0.915281 | 0.83773862 | 21.03503 | 0.081446 | 32.66 |
| 525    | 2015 | -0.36 | 0.09 | 0.915281 | 0.83773862 | 22.83059 | 0.033392 | 44.75 |
| 603111 | 2015 | 0.107 | 0.09 | 0.915281 | 0.83773862 | 21.65479 | 0.167985 | 11.52 |
| 600268 | 2015 | -0.03 | 0.09 | 0.915281 | 0.83773862 | 23.12305 | 0.057259 | 50.26 |
| 300402 | 2015 | -0.1  | 0.09 | 0.915281 | 0.83773862 | 21.14242 | 0.005985 | 57.52 |
| 600406 | 2015 | 0.366 | 0.09 | 0.915281 | 0.83773862 | 23.51439 | 0.16259  | 41.01 |
| 600406 | 2015 | 0.616 | 0.09 | 0.915281 | 0.83773862 | 23.51439 | 0.16259  | 41.01 |
| 600970 | 2015 | 0.049 | 0.09 | 0.915281 | 0.83773862 | 23.39842 | 0.095585 | 39.7  |
| 2165   | 2015 | 0.048 | 0.09 | 0.915281 | 0.83773862 | 21.30687 | 0.099467 | 24.29 |
| 603518 | 2015 | -0.74 | 0.09 | 0.915281 | 0.83773862 | 21.13483 | 0.081446 | 32.66 |
| 300172 | 2015 | 0.317 | 0.09 | 0.915281 | 0.83773862 | 20.95833 | 0.099883 | 28.98 |
| 600501 | 2015 | -0.15 | 0.09 | 0.915281 | 0.83773862 | 22.28004 | 0.015416 | 25.2  |
| 300172 | 2015 | -0.19 | 0.09 | 0.915281 | 0.83773862 | 21.1358  | 0.099883 | 28.98 |
| 300402 | 2015 | -0.15 | 0.09 | 0.915281 | 0.83773862 | 21.14242 | 0.005985 | 57.52 |
| 300339 | 2015 | -0.34 | 0.09 | 0.915281 | 0.83773862 | 22.33243 | 0.059886 | 17.46 |
| 2080   | 2015 | -0.24 | 0.09 | 0.915281 | 0.83773862 | 22.8024  | 0.109095 | 54.32 |
| 2080   | 2015 | -0.14 | 0.09 | 0.915281 | 0.83773862 | 22.8024  | 0.109095 | 54.32 |
| 600970 | 2015 | -0.32 | 0.09 | 0.915281 | 0.83773862 | 23.39842 | 0.095585 | 39.7  |
| 300356 | 2015 | -0.16 | 0.09 | 0.915281 | 0.83773862 | 21.16122 | 0.034835 | 26.42 |
| 300356 | 2015 | -0.04 | 0.09 | 0.915281 | 0.83773862 | 21.50166 | 0.034835 | 26.42 |
| 600074 | 2015 | -0.05 | 0.09 | 0.915281 | 0.83773862 | 21.70532 | 0.257137 | 36.49 |
| 600713 | 2015 | -0.11 | 0.09 | 0.915281 | 0.83773862 | 22.47985 | 0.071722 | 26.94 |
| 600268 | 2015 | 0.04  | 0.09 | 0.915281 | 0.83773862 | 23.12305 | 0.057259 | 50.26 |
| 300172 | 2015 | -0.14 | 0.09 | 0.915281 | 0.83773862 | 21.1358  | 0.099883 | 28.98 |
| 300172 | 2015 | -0.31 | 0.09 | 0.915281 | 0.83773862 | 21.1358  | 0.099883 | 28.98 |
| 600501 | 2015 | -0.06 | 0.09 | 0.915281 | 0.83773862 | 22.28004 | 0.015416 | 25.2  |
| 300284 | 2015 | 0.016 | 0.09 | 0.915281 | 0.83773862 | 22.41809 | 0.1209   | 21.9  |
| 600268 | 2015 | -0.54 | 0.09 | 0.915281 | 0.83773862 | 23.12305 | 0.057259 | 50.26 |
| 603111 | 2015 | -0.05 | 0.09 | 0.915281 | 0.83773862 | 21.65479 | 0.167985 | 11.52 |
| 600889 | 2015 | -0.97 | 0.09 | 0.915281 | 0.83773862 | 21.49847 | 0.302158 | 33.02 |
| 600268 | 2015 | -0.54 | 0.09 | 0.915281 | 0.83773862 | 23.12305 | 0.057259 | 50.26 |
| 603111 | 2015 | -0.04 | 0.09 | 0.915281 | 0.83773862 | 21.65479 | 0.167985 | 11.52 |
| 600970 | 2015 | -0.48 | 0.09 | 0.915281 | 0.83773862 | 23.39842 | 0.095585 | 39.7  |
| 600074 | 2015 | -0.13 | 0.09 | 0.915281 | 0.83773862 | 21.70532 | 0.257137 | 36.49 |
| 600406 | 2015 | 0.735 | 0.09 | 0.915281 | 0.83773862 | 23.51439 | 0.16259  | 41.01 |
| 600501 | 2015 | -0.39 | 0.09 | 0.915281 | 0.83773862 | 22.15449 | 0.015416 | 25.2  |
| 600970 | 2015 | -0.36 | 0.09 | 0.915281 | 0.83773862 | 23.39842 | 0.095585 | 39.7  |
| 600775 | 2015 | 0.152 | 0.09 | 0.915281 | 0.83773862 | 21.899   | 0.05466  | 26.42 |

|        |      |       |      |          |            |          |          |       |
|--------|------|-------|------|----------|------------|----------|----------|-------|
| 300209 | 2015 | 1.137 | 0.09 | 0.915281 | 0.83773862 | 20.7282  | -0.00095 | 25.35 |
| 727    | 2015 | 0.195 | 0.09 | 0.915281 | 0.83773862 | 24.18789 | 0.000951 | 24.51 |
| 300402 | 2015 | -0.1  | 0.09 | 0.915281 | 0.83773862 | 21.14242 | 0.005985 | 57.52 |
| 2315   | 2015 | 1.426 | 0.09 | 0.915281 | 0.83773862 | 21.62108 | 0.076852 | 58.61 |
| 600970 | 2015 | -0.16 | 0.09 | 0.915281 | 0.83773862 | 23.39842 | 0.095585 | 39.7  |
| 300172 | 2015 | -0.19 | 0.09 | 0.915281 | 0.83773862 | 21.1358  | 0.099883 | 28.98 |
| 2080   | 2015 | 0.093 | 0.09 | 0.915281 | 0.83773862 | 22.8024  | 0.109095 | 54.32 |
| 2080   | 2015 | -0.24 | 0.09 | 0.915281 | 0.83773862 | 22.8024  | 0.109095 | 54.32 |
| 603111 | 2015 | 0.314 | 0.09 | 0.915281 | 0.83773862 | 21.48012 | 0.167985 | 11.52 |
| 603518 | 2015 | -0.74 | 0.09 | 0.915281 | 0.83773862 | 21.13483 | 0.081446 | 32.66 |
| 525    | 2015 | 0.527 | 0.09 | 0.915281 | 0.83773862 | 22.83059 | 0.033392 | 44.75 |
| 600501 | 2015 | -0.21 | 0.09 | 0.915281 | 0.83773862 | 22.28004 | 0.015416 | 25.2  |
| 300209 | 2015 | 1.464 | 0.09 | 0.915281 | 0.83773862 | 20.7282  | -0.00095 | 25.35 |
| 600775 | 2015 | 0.118 | 0.09 | 0.915281 | 0.83773862 | 21.899   | 0.05466  | 26.42 |
| 2165   | 2015 | 0.392 | 0.09 | 0.915281 | 0.83773862 | 21.01463 | 0.099467 | 24.29 |
| 2080   | 2015 | 0.16  | 0.09 | 0.915281 | 0.83773862 | 22.8024  | 0.109095 | 54.32 |
| 525    | 2015 | 0.527 | 0.09 | 0.915281 | 0.83773862 | 22.83059 | 0.033392 | 44.75 |
| 300339 | 2015 | -0.18 | 0.09 | 0.915281 | 0.83773862 | 22.12169 | 0.059886 | 17.46 |
| 2182   | 2015 | 0.541 | 0.09 | 0.915281 | 0.83773862 | 21.7978  | 0.021109 | 30.18 |
| 600074 | 2015 | -0.4  | 0.09 | 0.915281 | 0.83773862 | 22.13832 | 0.257137 | 36.49 |
| 600970 | 2015 | 0.025 | 0.09 | 0.915281 | 0.83773862 | 23.39842 | 0.095585 | 39.7  |
| 600562 | 2015 | 0.434 | 0.09 | 0.915281 | 0.83773862 | 21.31363 | 0.182119 | 27.39 |
| 600074 | 2015 | -0.4  | 0.09 | 0.915281 | 0.83773862 | 21.70532 | 0.257137 | 36.49 |
| 2315   | 2015 | 1.426 | 0.09 | 0.915281 | 0.83773862 | 21.62108 | 0.076852 | 58.61 |
| 300172 | 2015 | 0.317 | 0.09 | 0.915281 | 0.83773862 | 21.1358  | 0.099883 | 28.98 |
| 300356 | 2015 | 0.086 | 0.09 | 0.915281 | 0.83773862 | 21.50166 | 0.034835 | 26.42 |
| 600775 | 2015 | 0.193 | 0.09 | 0.915281 | 0.83773862 | 21.899   | 0.05466  | 26.42 |
| 600282 | 2015 | -0.02 | 0.09 | 0.915281 | 0.83773862 | 24.31628 | -0.38491 | 45.31 |
| 300284 | 2015 | 0.463 | 0.09 | 0.915281 | 0.83773862 | 22.41809 | 0.1209   | 21.9  |
| 600406 | 2015 | 0.376 | 0.09 | 0.915281 | 0.83773862 | 23.51439 | 0.16259  | 41.01 |
| 600268 | 2015 | 0.284 | 0.09 | 0.915281 | 0.83773862 | 23.00585 | 0.057259 | 50.26 |
| 2380   | 2015 | 0.253 | 0.09 | 0.915281 | 0.83773862 | 20.95092 | 0.06175  | 29.95 |
| 603111 | 2015 | -0.03 | 0.09 | 0.915281 | 0.83773862 | 21.65479 | 0.167985 | 11.52 |
| 600970 | 2015 | -0.19 | 0.09 | 0.915281 | 0.83773862 | 23.39842 | 0.095585 | 39.7  |
| 600268 | 2015 | 0.284 | 0.09 | 0.915281 | 0.83773862 | 23.12305 | 0.057259 | 50.26 |
| 600775 | 2015 | 0.118 | 0.09 | 0.915281 | 0.83773862 | 21.899   | 0.05466  | 26.42 |
| 300339 | 2015 | 0.3   | 0.09 | 0.915281 | 0.83773862 | 22.12169 | 0.059886 | 17.46 |
| 603018 | 2015 | -0.18 | 0.09 | 0.915281 | 0.83773862 | 22.03842 | 0.091871 | 7.84  |
| 2090   | 2015 | 0.546 | 0.09 | 0.915281 | 0.83773862 | 21.11953 | 0.114743 | 37.7  |
| 600268 | 2015 | -0.06 | 0.09 | 0.915281 | 0.83773862 | 23.12305 | 0.057259 | 50.26 |
| 727    | 2015 | 0.275 | 0.09 | 0.915281 | 0.83773862 | 24.18789 | 0.000951 | 24.51 |
| 2165   | 2015 | 0.186 | 0.09 | 0.915281 | 0.83773862 | 21.30687 | 0.099467 | 24.29 |
| 525    | 2015 | 0.67  | 0.09 | 0.915281 | 0.83773862 | 22.83059 | 0.033392 | 44.75 |
| 603518 | 2015 | -0.74 | 0.09 | 0.915281 | 0.83773862 | 21.13483 | 0.081446 | 32.66 |
| 2546   | 2015 | -0.18 | 0.09 | 0.915281 | 0.83773862 | 21.33759 | 0.110518 | 49.48 |
| 600406 | 2015 | 0.616 | 0.09 | 0.915281 | 0.83773862 | 23.51439 | 0.16259  | 41.01 |
| 2080   | 2015 | 0.146 | 0.09 | 0.915281 | 0.83773862 | 22.8024  | 0.109095 | 54.32 |
| 603018 | 2015 | -0.09 | 0.09 | 0.915281 | 0.83773862 | 22.03842 | 0.091871 | 7.84  |
| 600074 | 2015 | 0.331 | 0.09 | 0.915281 | 0.83773862 | 21.70532 | 0.257137 | 36.49 |
| 600970 | 2015 | 0.025 | 0.09 | 0.915281 | 0.83773862 | 23.39842 | 0.095585 | 39.7  |
| 2080   | 2015 | 0.358 | 0.09 | 0.915281 | 0.83773862 | 22.8024  | 0.109095 | 54.32 |
| 600282 | 2015 | -0.08 | 0.09 | 0.915281 | 0.83773862 | 24.31628 | -0.38491 | 45.31 |
| 600268 | 2015 | -0.15 | 0.09 | 0.915281 | 0.83773862 | 23.12305 | 0.057259 | 50.26 |
| 2090   | 2015 | 1.091 | 0.09 | 0.915281 | 0.83773862 | 21.11953 | 0.114743 | 37.7  |



|        |      |       |      |          |            |          |          |       |
|--------|------|-------|------|----------|------------|----------|----------|-------|
| 2546   | 2015 | 0.454 | 0.09 | 0.915281 | 0.83773862 | 21.33759 | 0.110518 | 49.48 |
| 2080   | 2015 | 0.169 | 0.09 | 0.915281 | 0.83773862 | 22.24534 | 0.109095 | 54.32 |
| 2182   | 2015 | 0.541 | 0.09 | 0.915281 | 0.83773862 | 21.7978  | 0.021109 | 30.18 |
| 525    | 2015 | 0.356 | 0.09 | 0.915281 | 0.83773862 | 22.35291 | 0.033392 | 44.75 |
| 600501 | 2015 | -0.55 | 0.09 | 0.915281 | 0.83773862 | 22.28004 | 0.015416 | 25.2  |
| 2080   | 2015 | 0.146 | 0.09 | 0.915281 | 0.83773862 | 22.8024  | 0.109095 | 54.32 |
| 2182   | 2015 | 0.541 | 0.09 | 0.915281 | 0.83773862 | 21.59439 | 0.021109 | 30.18 |
| 2546   | 2015 | 0.114 | 0.09 | 0.915281 | 0.83773862 | 21.33759 | 0.110518 | 49.48 |
| 603018 | 2015 | -0.11 | 0.09 | 0.915281 | 0.83773862 | 22.03842 | 0.091871 | 7.84  |
| 600970 | 2015 | -0.61 | 0.09 | 0.915281 | 0.83773862 | 24.0744  | 0.095585 | 39.7  |
| 600268 | 2015 | -0.03 | 0.09 | 0.915281 | 0.83773862 | 23.12305 | 0.057259 | 50.26 |
| 300284 | 2015 | 0.866 | 0.09 | 0.915281 | 0.83773862 | 22.41809 | 0.1209   | 21.9  |
| 300284 | 2015 | 0.042 | 0.09 | 0.915281 | 0.83773862 | 22.41809 | 0.1209   | 21.9  |
| 600268 | 2015 | -0.03 | 0.09 | 0.915281 | 0.83773862 | 23.12305 | 0.057259 | 50.26 |
| 2165   | 2015 | 0.146 | 0.09 | 0.915281 | 0.83773862 | 21.30687 | 0.099467 | 24.29 |
| 2546   | 2015 | 0.187 | 0.09 | 0.915281 | 0.83773862 | 21.33759 | 0.110518 | 49.48 |
| 600501 | 2015 | -0.15 | 0.09 | 0.915281 | 0.83773862 | 22.28004 | 0.015416 | 25.2  |
| 600713 | 2015 | -0.11 | 0.09 | 0.915281 | 0.83773862 | 23.25655 | 0.071722 | 26.94 |
| 600501 | 2015 | -0.33 | 0.09 | 0.915281 | 0.83773862 | 22.28004 | 0.015416 | 25.2  |
| 600406 | 2015 | -0.18 | 0.09 | 0.915281 | 0.83773862 | 23.51439 | 0.16259  | 41.01 |
| 2024   | 2015 | 0.474 | 0.09 | 0.915281 | 0.83773862 | 25.20146 | 0.023735 | 26.44 |
| 300172 | 2015 | -0.09 | 0.09 | 0.915281 | 0.83773862 | 21.1358  | 0.099883 | 28.98 |
| 2024   | 2015 | 0.474 | 0.09 | 0.915281 | 0.83773862 | 25.20146 | 0.023735 | 26.44 |
| 727    | 2015 | 0.195 | 0.09 | 0.915281 | 0.83773862 | 24.18789 | 0.000951 | 24.51 |
| 600775 | 2015 | 0.307 | 0.09 | 0.915281 | 0.83773862 | 22.31083 | 0.05466  | 26.42 |
| 600775 | 2015 | 0.118 | 0.09 | 0.915281 | 0.83773862 | 21.899   | 0.05466  | 26.42 |
| 300172 | 2015 | -0.33 | 0.09 | 0.915281 | 0.83773862 | 21.1358  | 0.099883 | 28.98 |
| 603018 | 2015 | -0.59 | 0.09 | 0.915281 | 0.83773862 | 22.03842 | 0.091871 | 7.84  |
| 600268 | 2015 | -0.3  | 0.09 | 0.915281 | 0.83773862 | 23.12305 | 0.057259 | 50.26 |
| 300172 | 2015 | -0.09 | 0.09 | 0.915281 | 0.83773862 | 21.1358  | 0.099883 | 28.98 |
| 727    | 2015 | 0.078 | 0.09 | 0.915281 | 0.83773862 | 24.18789 | 0.000951 | 24.51 |
| 300172 | 2015 | -0.13 | 0.09 | 0.915281 | 0.83773862 | 21.1358  | 0.099883 | 28.98 |
| 727    | 2015 | 0.195 | 0.09 | 0.915281 | 0.83773862 | 24.18789 | 0.000951 | 24.51 |
| 600406 | 2015 | 0.971 | 0.09 | 0.915281 | 0.83773862 | 23.51439 | 0.16259  | 41.01 |
| 600282 | 2015 | -0.08 | 0.09 | 0.915281 | 0.83773862 | 24.31628 | -0.38491 | 45.31 |
| 2024   | 2015 | 0.362 | 0.09 | 0.915281 | 0.83773862 | 25.20146 | 0.023735 | 26.44 |
| 603018 | 2015 | -0.13 | 0.09 | 0.915281 | 0.83773862 | 21.97132 | 0.091871 | 7.84  |
| 300284 | 2015 | -0.46 | 0.09 | 0.915281 | 0.83773862 | 22.41809 | 0.1209   | 21.9  |
| 2546   | 2015 | 0.187 | 0.09 | 0.915281 | 0.83773862 | 21.33759 | 0.110518 | 49.48 |
| 603111 | 2015 | -0.03 | 0.09 | 0.915281 | 0.83773862 | 21.65479 | 0.167985 | 11.52 |
| 600406 | 2015 | -0.03 | 0.09 | 0.915281 | 0.83773862 | 23.51439 | 0.16259  | 41.01 |
| 300284 | 2015 | 0.259 | 0.09 | 0.915281 | 0.83773862 | 22.41809 | 0.1209   | 21.9  |
| 600406 | 2015 | -0.18 | 0.09 | 0.915281 | 0.83773862 | 23.51439 | 0.16259  | 41.01 |
| 600970 | 2015 | 0.025 | 0.09 | 0.915281 | 0.83773862 | 23.39842 | 0.095585 | 39.7  |
| 600282 | 2015 | -0.73 | 0.09 | 0.915281 | 0.83773862 | 24.31628 | -0.38491 | 45.31 |
| 600501 | 2015 | -0.15 | 0.09 | 0.915281 | 0.83773862 | 22.28004 | 0.015416 | 25.2  |
| 2090   | 2015 | 0.516 | 0.09 | 0.915281 | 0.83773862 | 21.11953 | 0.114743 | 37.7  |
| 2315   | 2015 | 1.426 | 0.09 | 0.915281 | 0.83773862 | 21.62108 | 0.076852 | 58.61 |
| 600970 | 2015 | -0.19 | 0.09 | 0.915281 | 0.83773862 | 23.39842 | 0.095585 | 39.7  |
| 300402 | 2015 | -0.27 | 0.09 | 0.915281 | 0.83773862 | 21.01613 | 0.005985 | 57.52 |
| 2546   | 2015 | 0.166 | 0.09 | 0.915281 | 0.83773862 | 21.33759 | 0.110518 | 49.48 |
| 2380   | 2015 | 0.295 | 0.09 | 0.915281 | 0.83773862 | 20.95092 | 0.06175  | 29.95 |
| 2546   | 2015 | 0.187 | 0.09 | 0.915281 | 0.83773862 | 21.33759 | 0.110518 | 49.48 |
| 600268 | 2015 | 0.007 | 0.09 | 0.915281 | 0.83773862 | 23.12305 | 0.057259 | 50.26 |

|        |      |       |      |          |            |          |          |       |
|--------|------|-------|------|----------|------------|----------|----------|-------|
| 300209 | 2015 | 1.294 | 0.09 | 0.915281 | 0.83773862 | 20.7282  | -0.00095 | 25.35 |
| 600282 | 2015 | -0.73 | 0.09 | 0.915281 | 0.83773862 | 24.31628 | -0.38491 | 45.31 |
| 600501 | 2015 | -0.22 | 0.09 | 0.915281 | 0.83773862 | 22.28004 | 0.015416 | 25.2  |
| 300356 | 2015 | -0.08 | 0.09 | 0.915281 | 0.83773862 | 21.50166 | 0.034835 | 26.42 |
| 600775 | 2015 | -0.05 | 0.09 | 0.915281 | 0.83773862 | 21.899   | 0.05466  | 26.42 |
| 2090   | 2015 | -0.23 | 0.09 | 0.915281 | 0.83773862 | 21.11953 | 0.114743 | 37.7  |
| 300209 | 2015 | 0.916 | 0.09 | 0.915281 | 0.83773862 | 20.65257 | -0.00095 | 25.35 |
| 600268 | 2015 | -0.08 | 0.09 | 0.915281 | 0.83773862 | 23.12305 | 0.057259 | 50.26 |
| 603111 | 2015 | -0.14 | 0.09 | 0.915281 | 0.83773862 | 21.65479 | 0.167985 | 11.52 |
| 600562 | 2015 | 0.098 | 0.09 | 0.915281 | 0.83773862 | 21.31363 | 0.182119 | 27.39 |
| 2080   | 2015 | 0.146 | 0.09 | 0.915281 | 0.83773862 | 22.8024  | 0.109095 | 54.32 |
| 2182   | 2015 | -0.42 | 0.09 | 0.915281 | 0.83773862 | 21.7978  | 0.021109 | 30.18 |
| 2380   | 2015 | 0.253 | 0.09 | 0.915281 | 0.83773862 | 20.95092 | 0.06175  | 29.95 |
| 2165   | 2015 | 0.277 | 0.09 | 0.915281 | 0.83773862 | 21.30687 | 0.099467 | 24.29 |
| 600268 | 2015 | 0.284 | 0.09 | 0.915281 | 0.83773862 | 23.12305 | 0.057259 | 50.26 |
| 300284 | 2015 | 0.053 | 0.09 | 0.915281 | 0.83773862 | 22.41809 | 0.1209   | 21.9  |
| 600268 | 2015 | 0.284 | 0.09 | 0.915281 | 0.83773862 | 23.12305 | 0.057259 | 50.26 |
| 2182   | 2015 | -0.42 | 0.09 | 0.915281 | 0.83773862 | 21.7978  | 0.021109 | 30.18 |
| 600406 | 2015 | 0.948 | 0.09 | 0.915281 | 0.83773862 | 23.51439 | 0.16259  | 41.01 |
| 300356 | 2015 | -0.21 | 0.09 | 0.915281 | 0.83773862 | 21.50166 | 0.034835 | 26.42 |
| 600064 | 2015 | 0.351 | 0.09 | 0.915281 | 0.83773862 | 23.32104 | 0.092981 | 34.65 |
| 600562 | 2015 | 0.183 | 0.09 | 0.915281 | 0.83773862 | 21.31363 | 0.182119 | 27.39 |
| 2380   | 2015 | 0.281 | 0.09 | 0.915281 | 0.83773862 | 20.95092 | 0.06175  | 29.95 |
| 525    | 2015 | 0.127 | 0.09 | 0.915281 | 0.83773862 | 22.83059 | 0.033392 | 44.75 |
| 600889 | 2015 | -0.97 | 0.09 | 0.915281 | 0.83773862 | 21.49847 | 0.302158 | 33.02 |
| 2090   | 2015 | 0.516 | 0.09 | 0.915281 | 0.83773862 | 21.11953 | 0.114743 | 37.7  |
| 2546   | 2015 | 0.187 | 0.09 | 0.915281 | 0.83773862 | 21.33759 | 0.110518 | 49.48 |
| 600268 | 2015 | 0.284 | 0.09 | 0.915281 | 0.83773862 | 23.12305 | 0.057259 | 50.26 |
| 2315   | 2015 | 1.426 | 0.09 | 0.915281 | 0.83773862 | 21.62108 | 0.076852 | 58.61 |
| 300284 | 2015 | 0.059 | 0.09 | 0.915281 | 0.83773862 | 22.41809 | 0.1209   | 21.9  |
| 2182   | 2015 | 0.541 | 0.09 | 0.915281 | 0.83773862 | 21.7978  | 0.021109 | 30.18 |
| 600406 | 2015 | 0.971 | 0.09 | 0.915281 | 0.83773862 | 23.51439 | 0.16259  | 41.01 |
| 727    | 2015 | 0.195 | 0.09 | 0.915281 | 0.83773862 | 24.18789 | 0.000951 | 24.51 |
| 600775 | 2015 | -0.1  | 0.09 | 0.915281 | 0.83773862 | 21.899   | 0.05466  | 26.42 |
| 600406 | 2015 | 0.643 | 0.09 | 0.915281 | 0.83773862 | 23.0769  | 0.16259  | 41.01 |
| 2182   | 2015 | 0.541 | 0.09 | 0.915281 | 0.83773862 | 21.7978  | 0.021109 | 30.18 |
| 603111 | 2015 | -0.16 | 0.09 | 0.915281 | 0.83773862 | 21.65479 | 0.167985 | 11.52 |
| 2090   | 2015 | 0.428 | 0.09 | 0.915281 | 0.83773862 | 21.69497 | 0.114743 | 37.7  |
| 300209 | 2015 | 1.464 | 0.09 | 0.915281 | 0.83773862 | 20.7282  | -0.00095 | 25.35 |
| 600074 | 2015 | 0.748 | 0.09 | 0.915281 | 0.83773862 | 21.70532 | 0.257137 | 36.49 |
| 300284 | 2015 | -0.17 | 0.09 | 0.915281 | 0.83773862 | 22.41809 | 0.1209   | 21.9  |
| 600775 | 2015 | 0.487 | 0.09 | 0.915281 | 0.83773862 | 21.899   | 0.05466  | 26.42 |
| 600406 | 2015 | 0.653 | 0.09 | 0.915281 | 0.83773862 | 23.51439 | 0.16259  | 41.01 |
| 2380   | 2015 | 0.253 | 0.09 | 0.915281 | 0.83773862 | 20.95092 | 0.06175  | 29.95 |
| 300172 | 2015 | 0.25  | 0.09 | 0.915281 | 0.83773862 | 21.1358  | 0.099883 | 28.98 |
| 300284 | 2015 | 0.203 | 0.09 | 0.915281 | 0.83773862 | 22.41809 | 0.1209   | 21.9  |
| 2024   | 2015 | 0.362 | 0.09 | 0.915281 | 0.83773862 | 25.20146 | 0.023735 | 26.44 |
| 300209 | 2015 | 1.464 | 0.09 | 0.915281 | 0.83773862 | 20.7282  | -0.00095 | 25.35 |
| 2182   | 2015 | -0.62 | 0.09 | 0.915281 | 0.83773862 | 21.7978  | 0.021109 | 30.18 |
| 600775 | 2015 | -0.51 | 0.09 | 0.915281 | 0.83773862 | 21.899   | 0.05466  | 26.42 |
| 300209 | 2015 | 1.464 | 0.09 | 0.915281 | 0.83773862 | 20.7282  | -0.00095 | 25.35 |
| 2546   | 2015 | 0.029 | 0.09 | 0.915281 | 0.83773862 | 21.33759 | 0.110518 | 49.48 |
| 300209 | 2015 | 1.15  | 0.09 | 0.915281 | 0.83773862 | 20.7282  | -0.00095 | 25.35 |
| 600889 | 2015 | -0.97 | 0.09 | 0.915281 | 0.83773862 | 21.49847 | 0.302158 | 33.02 |

|        |      |       |      |          |            |          |          |       |
|--------|------|-------|------|----------|------------|----------|----------|-------|
| 300172 | 2015 | -0.09 | 0.09 | 0.915281 | 0.83773862 | 21.1358  | 0.099883 | 28.98 |
| 2080   | 2015 | 0.169 | 0.09 | 0.915281 | 0.83773862 | 22.8024  | 0.109095 | 54.32 |
| 300209 | 2015 | 1.464 | 0.09 | 0.915281 | 0.83773862 | 20.7282  | -0.00095 | 25.35 |
| 600268 | 2015 | -0.1  | 0.09 | 0.915281 | 0.83773862 | 23.12305 | 0.057259 | 50.26 |
| 600889 | 2015 | -0.97 | 0.09 | 0.915281 | 0.83773862 | 21.49847 | 0.302158 | 33.02 |
| 600501 | 2015 | -0.55 | 0.09 | 0.915281 | 0.83773862 | 22.28004 | 0.015416 | 25.2  |
| 600268 | 2015 | -0.06 | 0.09 | 0.915281 | 0.83773862 | 23.12305 | 0.057259 | 50.26 |
| 2090   | 2015 | 0.555 | 0.09 | 0.915281 | 0.83773862 | 21.11953 | 0.114743 | 37.7  |
| 2380   | 2015 | 0.253 | 0.09 | 0.915281 | 0.83773862 | 20.9577  | 0.06175  | 29.95 |
| 600713 | 2015 | -0.11 | 0.09 | 0.915281 | 0.83773862 | 23.25655 | 0.071722 | 26.94 |
| 727    | 2015 | 0.299 | 0.09 | 0.915281 | 0.83773862 | 24.18789 | 0.000951 | 24.51 |
| 600970 | 2015 | -0.34 | 0.09 | 0.915281 | 0.83773862 | 23.39842 | 0.095585 | 39.7  |
| 2090   | 2015 | 1.091 | 0.09 | 0.915281 | 0.83773862 | 21.11953 | 0.114743 | 37.7  |
| 300209 | 2015 | 1.232 | 0.09 | 0.915281 | 0.83773862 | 20.7282  | -0.00095 | 25.35 |
| 600889 | 2015 | -0.97 | 0.09 | 0.915281 | 0.83773862 | 21.28278 | 0.302158 | 33.02 |
| 603518 | 2015 | -0.74 | 0.09 | 0.915281 | 0.83773862 | 21.13483 | 0.081446 | 32.66 |
| 2546   | 2015 | -0.02 | 0.09 | 0.915281 | 0.83773862 | 21.14818 | 0.110518 | 49.48 |
| 600970 | 2015 | 0.025 | 0.09 | 0.915281 | 0.83773862 | 23.39842 | 0.095585 | 39.7  |
| 600268 | 2015 | 0.284 | 0.09 | 0.915281 | 0.83773862 | 23.12305 | 0.057259 | 50.26 |
| 600268 | 2015 | -0.01 | 0.09 | 0.915281 | 0.83773862 | 23.12305 | 0.057259 | 50.26 |
| 2380   | 2015 | 0.295 | 0.09 | 0.915281 | 0.83773862 | 20.95092 | 0.06175  | 29.95 |
| 600501 | 2015 | -0.14 | 0.09 | 0.915281 | 0.83773862 | 22.28004 | 0.015416 | 25.2  |
| 2182   | 2015 | 0.541 | 0.09 | 0.915281 | 0.83773862 | 21.7978  | 0.021109 | 30.18 |
| 600064 | 2015 | 0.351 | 0.09 | 0.915281 | 0.83773862 | 23.84332 | 0.092981 | 34.65 |
| 2165   | 2015 | 0.048 | 0.09 | 0.915281 | 0.83773862 | 21.30687 | 0.099467 | 24.29 |
| 603018 | 2015 | -0.09 | 0.09 | 0.915281 | 0.83773862 | 22.03842 | 0.091871 | 7.84  |
| 2165   | 2015 | 0.277 | 0.09 | 0.915281 | 0.83773862 | 21.30687 | 0.099467 | 24.29 |
| 600970 | 2015 | -0.38 | 0.09 | 0.915281 | 0.83773862 | 23.39842 | 0.095585 | 39.7  |
| 600970 | 2015 | -0.61 | 0.09 | 0.915281 | 0.83773862 | 23.39842 | 0.095585 | 39.7  |
| 300356 | 2015 | 0.086 | 0.09 | 0.915281 | 0.83773862 | 21.50166 | 0.034835 | 26.42 |
| 2182   | 2015 | -0.42 | 0.09 | 0.915281 | 0.83773862 | 21.7978  | 0.021109 | 30.18 |
| 600562 | 2015 | 0.614 | 0.09 | 0.915281 | 0.83773862 | 21.31363 | 0.182119 | 27.39 |
| 603018 | 2015 | 0.05  | 0.09 | 0.915281 | 0.83773862 | 22.03842 | 0.091871 | 7.84  |
| 300339 | 2015 | 0.3   | 0.09 | 0.915281 | 0.83773862 | 22.12169 | 0.059886 | 17.46 |
| 300209 | 2015 | 0.916 | 0.09 | 0.915281 | 0.83773862 | 20.7282  | -0.00095 | 25.35 |
| 600268 | 2015 | 0.284 | 0.09 | 0.915281 | 0.83773862 | 23.12305 | 0.057259 | 50.26 |
| 603018 | 2015 | 0.05  | 0.09 | 0.915281 | 0.83773862 | 22.03842 | 0.091871 | 7.84  |
| 525    | 2015 | 0.64  | 0.09 | 0.915281 | 0.83773862 | 22.83059 | 0.033392 | 44.75 |
| 300284 | 2015 | 0.054 | 0.09 | 0.915281 | 0.83773862 | 22.41809 | 0.1209   | 21.9  |
| 2080   | 2015 | 0.114 | 0.09 | 0.915281 | 0.83773862 | 22.8024  | 0.109095 | 54.32 |
| 600268 | 2015 | -0.1  | 0.09 | 0.915281 | 0.83773862 | 23.12305 | 0.057259 | 50.26 |
| 300284 | 2015 | -0.07 | 0.09 | 0.915281 | 0.83773862 | 22.41809 | 0.1209   | 21.9  |
| 300172 | 2015 | -0.15 | 0.09 | 0.915281 | 0.83773862 | 21.1358  | 0.099883 | 28.98 |
| 2024   | 2015 | 0.366 | 0.09 | 0.915281 | 0.83773862 | 25.20146 | 0.023735 | 26.44 |
| 600064 | 2015 | 0.351 | 0.09 | 0.915281 | 0.83773862 | 23.84332 | 0.092981 | 34.65 |
| 2315   | 2015 | 1.426 | 0.09 | 0.915281 | 0.83773862 | 21.62762 | 0.076852 | 58.61 |
| 716    | 2015 | -0.93 | 0.1  | 1.106815 | 1.2250399  | 21.76169 | 0.085796 | 32.72 |
| 911    | 2015 | -0.78 | 0.1  | 1.106815 | 1.2250399  | 22.4611  | 0.031954 | 42.2  |
| 601996 | 2015 | -0.26 | 0.1  | 1.106815 | 1.2250399  | 21.36795 | 0.031024 | 48.94 |
| 2592   | 2015 | 0.191 | 0.1  | 1.106815 | 1.2250399  | 21.65733 | 0.062202 | 28.81 |
| 2329   | 2015 | -0.85 | 0.1  | 1.106815 | 1.2250399  | 22.21696 | 0.077465 | 36.18 |
| 911    | 2015 | -0.12 | 0.1  | 1.106815 | 1.2250399  | 22.4611  | 0.031954 | 42.2  |
| 2696   | 2015 | 0.35  | 0.1  | 1.106815 | 1.2250399  | 21.35783 | 0.057309 | 44.03 |
| 2329   | 2015 | -0.85 | 0.1  | 1.106815 | 1.2250399  | 22.21696 | 0.077465 | 36.18 |

|        |      |       |      |          |           |          |          |       |
|--------|------|-------|------|----------|-----------|----------|----------|-------|
| 2592   | 2015 | -0.29 | 0.1  | 1.106815 | 1.2250399 | 21.65733 | 0.062202 | 28.81 |
| 716    | 2015 | -0.93 | 0.1  | 1.106815 | 1.2250399 | 21.76169 | 0.085796 | 32.72 |
| 2696   | 2015 | 0.35  | 0.1  | 1.106815 | 1.2250399 | 21.35783 | 0.057309 | 44.03 |
| 2329   | 2015 | -0.85 | 0.1  | 1.106815 | 1.2250399 | 22.21696 | 0.077465 | 36.18 |
| 601996 | 2015 | -0.26 | 0.1  | 1.106815 | 1.2250399 | 21.48996 | 0.031024 | 48.94 |
| 911    | 2015 | -0.78 | 0.1  | 1.106815 | 1.2250399 | 22.37351 | 0.031954 | 42.2  |
| 2329   | 2015 | -0.85 | 0.1  | 1.106815 | 1.2250399 | 22.21696 | 0.077465 | 36.18 |
| 2329   | 2015 | -0.85 | 0.1  | 1.106815 | 1.2250399 | 22.21696 | 0.077465 | 36.18 |
| 911    | 2015 | -0.12 | 0.1  | 1.106815 | 1.2250399 | 22.4611  | 0.031954 | 42.2  |
| 2696   | 2015 | 0.35  | 0.1  | 1.106815 | 1.2250399 | 21.35783 | 0.057309 | 44.03 |
| 2592   | 2015 | -0.29 | 0.1  | 1.106815 | 1.2250399 | 21.65733 | 0.062202 | 28.81 |
| 601996 | 2015 | -0.26 | 0.1  | 1.106815 | 1.2250399 | 21.48996 | 0.031024 | 48.94 |
| 2696   | 2015 | 0.35  | 0.1  | 1.106815 | 1.2250399 | 21.35783 | 0.057309 | 44.03 |
| 2329   | 2015 | -0.85 | 0.1  | 1.106815 | 1.2250399 | 22.21696 | 0.077465 | 36.18 |
| 2592   | 2015 | 0.101 | 0.1  | 1.106815 | 1.2250399 | 21.65733 | 0.062202 | 28.81 |
| 716    | 2015 | -0.93 | 0.1  | 1.106815 | 1.2250399 | 21.76169 | 0.085796 | 32.72 |
| 911    | 2015 | -0.12 | 0.1  | 1.106815 | 1.2250399 | 22.4611  | 0.031954 | 42.2  |
| 2696   | 2015 | 0.35  | 0.1  | 1.106815 | 1.2250399 | 20.97551 | 0.057309 | 44.03 |
| 716    | 2015 | -0.93 | 0.1  | 1.106815 | 1.2250399 | 21.45737 | 0.085796 | 32.72 |
| 2329   | 2015 | -0.85 | 0.1  | 1.106815 | 1.2250399 | 22.21696 | 0.077465 | 36.18 |
| 2329   | 2015 | -0.85 | 0.1  | 1.106815 | 1.2250399 | 22.21696 | 0.077465 | 36.18 |
| 2329   | 2015 | -0.85 | 0.1  | 1.106815 | 1.2250399 | 21.93763 | 0.077465 | 36.18 |
| 911    | 2015 | -0.12 | 0.1  | 1.106815 | 1.2250399 | 22.4611  | 0.031954 | 42.2  |
| 911    | 2015 | -0.28 | 0.1  | 1.106815 | 1.2250399 | 22.4611  | 0.031954 | 42.2  |
| 2329   | 2015 | -0.85 | 0.1  | 1.106815 | 1.2250399 | 22.21696 | 0.077465 | 36.18 |
| 911    | 2015 | -0.78 | 0.1  | 1.106815 | 1.2250399 | 22.4611  | 0.031954 | 42.2  |
| 2696   | 2015 | 0.35  | 0.1  | 1.106815 | 1.2250399 | 21.35783 | 0.057309 | 44.03 |
| 2592   | 2015 | -0.62 | 0.1  | 1.106815 | 1.2250399 | 21.65733 | 0.062202 | 28.81 |
| 2592   | 2015 | -0.08 | 0.1  | 1.106815 | 1.2250399 | 21.6443  | 0.062202 | 28.81 |
| 2036   | 2015 | -0.35 | 0.08 | 1.786084 | 3.1900951 | 21.77621 | 0.108272 | 14.11 |
| 2036   | 2015 | -0.29 | 0.08 | 1.786084 | 3.1900951 | 21.77621 | 0.108272 | 14.11 |
| 600363 | 2015 | -0.49 | 0.08 | 1.786084 | 3.1900951 | 21.64141 | 0.071103 | 21.73 |
| 2695   | 2015 | -0.68 | 0.08 | 1.786084 | 3.1900951 | 21.3265  | 0.041871 | 50.91 |
| 600590 | 2015 | 1.152 | 0.08 | 1.786084 | 3.1900951 | 22.69145 | 0.03117  | 21.68 |
| 2157   | 2015 | -0.83 | 0.08 | 1.786084 | 3.1900951 | 23.00192 | 0.094573 | 29.01 |
| 600590 | 2015 | -0.17 | 0.08 | 1.786084 | 3.1900951 | 22.69145 | 0.03117  | 21.68 |
| 2695   | 2015 | -0.68 | 0.08 | 1.786084 | 3.1900951 | 21.3265  | 0.041871 | 50.91 |
| 2591   | 2015 | 0.182 | 0.08 | 1.786084 | 3.1900951 | 20.64905 | -0.09016 | 25.93 |
| 2695   | 2015 | -0.68 | 0.08 | 1.786084 | 3.1900951 | 21.3265  | 0.041871 | 50.91 |
| 2591   | 2015 | 0.182 | 0.08 | 1.786084 | 3.1900951 | 20.64905 | -0.09016 | 25.93 |
| 600590 | 2015 | 0.364 | 0.08 | 1.786084 | 3.1900951 | 22.69145 | 0.03117  | 21.68 |
| 990    | 2015 | 0.134 | 0.08 | 1.786084 | 3.1900951 | 22.31827 | 0.056317 | 38.01 |
| 2157   | 2015 | -0.39 | 0.08 | 1.786084 | 3.1900951 | 23.00192 | 0.094573 | 29.01 |
| 600363 | 2015 | -0.33 | 0.08 | 1.786084 | 3.1900951 | 21.99891 | 0.071103 | 21.73 |
| 600363 | 2015 | -0.74 | 0.08 | 1.786084 | 3.1900951 | 21.99891 | 0.071103 | 21.73 |
| 600750 | 2015 | 0.62  | 0.08 | 1.786084 | 3.1900951 | 21.70845 | 0.156301 | 43.03 |
| 600363 | 2015 | -0.74 | 0.08 | 1.786084 | 3.1900951 | 21.99891 | 0.071103 | 21.73 |
| 2157   | 2015 | 0.203 | 0.08 | 1.786084 | 3.1900951 | 23.00192 | 0.094573 | 29.01 |
| 600590 | 2015 | 0.08  | 0.08 | 1.786084 | 3.1900951 | 22.69145 | 0.03117  | 21.68 |
| 600507 | 2015 | -0.98 | 0.08 | 1.786084 | 3.1900951 | 22.9539  | 0.05056  | 39.62 |
| 600363 | 2015 | -0.74 | 0.08 | 1.786084 | 3.1900951 | 21.99891 | 0.071103 | 21.73 |
| 2157   | 2015 | -0.83 | 0.08 | 1.786084 | 3.1900951 | 23.00192 | 0.094573 | 29.01 |
| 2036   | 2015 | -0.46 | 0.08 | 1.786084 | 3.1900951 | 21.77621 | 0.108272 | 14.11 |
| 2157   | 2015 | -0.83 | 0.08 | 1.786084 | 3.1900951 | 23.00192 | 0.094573 | 29.01 |

|        |      |       |      |          |           |          |          |       |
|--------|------|-------|------|----------|-----------|----------|----------|-------|
| 600363 | 2015 | -0.74 | 0.08 | 1.786084 | 3.1900951 | 21.99891 | 0.071103 | 21.73 |
| 600590 | 2015 | -0.11 | 0.08 | 1.786084 | 3.1900951 | 22.69145 | 0.03117  | 21.68 |
| 2157   | 2015 | -0.83 | 0.08 | 1.786084 | 3.1900951 | 23.00192 | 0.094573 | 29.01 |
| 600750 | 2015 | 0.62  | 0.08 | 1.786084 | 3.1900951 | 21.70845 | 0.156301 | 43.03 |
| 600590 | 2015 | -0.17 | 0.08 | 1.786084 | 3.1900951 | 22.69145 | 0.03117  | 21.68 |
| 2157   | 2015 | -0.83 | 0.08 | 1.786084 | 3.1900951 | 23.00192 | 0.094573 | 29.01 |
| 550    | 2015 | -0.25 | 0.08 | 1.786084 | 3.1900951 | 23.7702  | 0.185463 | 41.03 |
| 600750 | 2015 | 0.62  | 0.08 | 1.786084 | 3.1900951 | 21.70845 | 0.156301 | 43.03 |
| 600590 | 2015 | -0.11 | 0.08 | 1.786084 | 3.1900951 | 22.69145 | 0.03117  | 21.68 |
| 600363 | 2015 | -0.38 | 0.08 | 1.786084 | 3.1900951 | 21.99891 | 0.071103 | 21.73 |
| 550    | 2015 | -0.25 | 0.08 | 1.786084 | 3.1900951 | 23.68813 | 0.185463 | 41.03 |
| 2036   | 2015 | -0.35 | 0.08 | 1.786084 | 3.1900951 | 21.9346  | 0.108272 | 14.11 |
| 600590 | 2015 | -0.17 | 0.08 | 1.786084 | 3.1900951 | 22.69145 | 0.03117  | 21.68 |
| 600507 | 2015 | -0.84 | 0.08 | 1.786084 | 3.1900951 | 22.9539  | 0.05056  | 39.62 |
| 600590 | 2015 | -0.17 | 0.08 | 1.786084 | 3.1900951 | 22.38548 | 0.03117  | 21.68 |
| 600590 | 2015 | 0.097 | 0.08 | 1.786084 | 3.1900951 | 22.69145 | 0.03117  | 21.68 |
| 600750 | 2015 | 0.62  | 0.08 | 1.786084 | 3.1900951 | 21.70008 | 0.156301 | 43.03 |
| 600363 | 2015 | -0.74 | 0.08 | 1.786084 | 3.1900951 | 21.99891 | 0.071103 | 21.73 |
| 2036   | 2015 | -0.46 | 0.08 | 1.786084 | 3.1900951 | 21.77621 | 0.108272 | 14.11 |
| 600363 | 2015 | -0.66 | 0.08 | 1.786084 | 3.1900951 | 21.99891 | 0.071103 | 21.73 |
| 600507 | 2015 | -0.62 | 0.08 | 1.786084 | 3.1900951 | 22.9539  | 0.05056  | 39.62 |
| 2591   | 2015 | 0.182 | 0.08 | 1.786084 | 3.1900951 | 20.64905 | -0.09016 | 25.93 |
| 600750 | 2015 | 0.62  | 0.08 | 1.786084 | 3.1900951 | 21.70845 | 0.156301 | 43.03 |
| 600590 | 2015 | 0.269 | 0.08 | 1.786084 | 3.1900951 | 22.69145 | 0.03117  | 21.68 |
| 2695   | 2015 | -0.68 | 0.08 | 1.786084 | 3.1900951 | 21.18039 | 0.041871 | 50.91 |
| 2157   | 2015 | -0.4  | 0.08 | 1.786084 | 3.1900951 | 23.00192 | 0.094573 | 29.01 |
| 600507 | 2015 | -0.98 | 0.08 | 1.786084 | 3.1900951 | 22.78697 | 0.05056  | 39.62 |
| 600590 | 2015 | 0.404 | 0.08 | 1.786084 | 3.1900951 | 22.69145 | 0.03117  | 21.68 |
| 2036   | 2015 | -0.46 | 0.08 | 1.786084 | 3.1900951 | 21.77621 | 0.108272 | 14.11 |
| 2591   | 2015 | 0.182 | 0.08 | 1.786084 | 3.1900951 | 20.64905 | -0.09016 | 25.93 |
| 600363 | 2015 | -0.74 | 0.08 | 1.786084 | 3.1900951 | 21.99891 | 0.071103 | 21.73 |
| 600363 | 2015 | -0.74 | 0.08 | 1.786084 | 3.1900951 | 21.99891 | 0.071103 | 21.73 |
| 600363 | 2015 | -0.74 | 0.08 | 1.786084 | 3.1900951 | 21.99891 | 0.071103 | 21.73 |
| 2036   | 2015 | -0.35 | 0.08 | 1.786084 | 3.1900951 | 21.77621 | 0.108272 | 14.11 |
| 600363 | 2015 | -0.74 | 0.08 | 1.786084 | 3.1900951 | 21.99891 | 0.071103 | 21.73 |
| 990    | 2015 | -0.85 | 0.08 | 1.786084 | 3.1900951 | 22.31827 | 0.056317 | 38.01 |
| 600750 | 2015 | 0.62  | 0.08 | 1.786084 | 3.1900951 | 21.70845 | 0.156301 | 43.03 |
| 990    | 2015 | 0.179 | 0.08 | 1.786084 | 3.1900951 | 22.31827 | 0.056317 | 38.01 |
| 2591   | 2015 | 0.182 | 0.08 | 1.786084 | 3.1900951 | 20.57601 | -0.09016 | 25.93 |
| 600363 | 2015 | -0.74 | 0.08 | 1.786084 | 3.1900951 | 21.99891 | 0.071103 | 21.73 |
| 600750 | 2015 | 0.62  | 0.08 | 1.786084 | 3.1900951 | 21.70845 | 0.156301 | 43.03 |
| 2036   | 2015 | -0.35 | 0.08 | 1.786084 | 3.1900951 | 21.77621 | 0.108272 | 14.11 |
| 600507 | 2015 | -0.94 | 0.08 | 1.786084 | 3.1900951 | 22.9539  | 0.05056  | 39.62 |
| 990    | 2015 | 0.134 | 0.08 | 1.786084 | 3.1900951 | 22.31827 | 0.056317 | 38.01 |
| 600590 | 2015 | 1.152 | 0.08 | 1.786084 | 3.1900951 | 22.69145 | 0.03117  | 21.68 |
| 600590 | 2015 | 0.035 | 0.08 | 1.786084 | 3.1900951 | 22.69145 | 0.03117  | 21.68 |
| 2157   | 2015 | -0.83 | 0.08 | 1.786084 | 3.1900951 | 23.00192 | 0.094573 | 29.01 |
| 2591   | 2015 | 0.182 | 0.08 | 1.786084 | 3.1900951 | 20.64905 | -0.09016 | 25.93 |
| 600507 | 2015 | -0.94 | 0.08 | 1.786084 | 3.1900951 | 22.9539  | 0.05056  | 39.62 |
| 2591   | 2015 | 0.182 | 0.08 | 1.786084 | 3.1900951 | 20.64905 | -0.09016 | 25.93 |
| 990    | 2015 | 0.299 | 0.08 | 1.786084 | 3.1900951 | 22.31827 | 0.056317 | 38.01 |
| 2591   | 2015 | 0.182 | 0.08 | 1.786084 | 3.1900951 | 20.64905 | -0.09016 | 25.93 |
| 600363 | 2015 | -0.74 | 0.08 | 1.786084 | 3.1900951 | 21.99891 | 0.071103 | 21.73 |
| 600590 | 2015 | 0.465 | 0.08 | 1.786084 | 3.1900951 | 22.69145 | 0.03117  | 21.68 |

|        |      |       |      |          |            |          |          |       |
|--------|------|-------|------|----------|------------|----------|----------|-------|
| 2591   | 2015 | 0.182 | 0.08 | 1.786084 | 3.1900951  | 20.64905 | -0.09016 | 25.93 |
| 2591   | 2015 | 0.182 | 0.08 | 1.786084 | 3.1900951  | 20.64905 | -0.09016 | 25.93 |
| 2157   | 2015 | -0.83 | 0.08 | 1.786084 | 3.1900951  | 22.6709  | 0.094573 | 29.01 |
| 600363 | 2015 | -0.74 | 0.08 | 1.786084 | 3.1900951  | 21.99891 | 0.071103 | 21.73 |
| 990    | 2015 | 0.134 | 0.08 | 1.786084 | 3.1900951  | 22.31827 | 0.056317 | 38.01 |
| 2591   | 2015 | 0.182 | 0.08 | 1.786084 | 3.1900951  | 20.64905 | -0.09016 | 25.93 |
| 600507 | 2015 | -0.2  | 0.08 | 1.786084 | 3.1900951  | 22.9539  | 0.05056  | 39.62 |
| 600750 | 2015 | 0.62  | 0.08 | 1.786084 | 3.1900951  | 21.70845 | 0.156301 | 43.03 |
| 600590 | 2015 | -0.01 | 0.08 | 1.786084 | 3.1900951  | 22.69145 | 0.03117  | 21.68 |
| 550    | 2015 | -0.25 | 0.08 | 1.786084 | 3.1900951  | 23.7702  | 0.185463 | 41.03 |
| 600363 | 2015 | -0.74 | 0.08 | 1.786084 | 3.1900951  | 21.99891 | 0.071103 | 21.73 |
| 2036   | 2015 | 0.204 | 0.08 | 1.786084 | 3.1900951  | 21.77621 | 0.108272 | 14.11 |
| 600363 | 2015 | -0.74 | 0.08 | 1.786084 | 3.1900951  | 21.99891 | 0.071103 | 21.73 |
| 600750 | 2015 | 0.62  | 0.08 | 1.786084 | 3.1900951  | 21.70845 | 0.156301 | 43.03 |
| 600590 | 2015 | 0.228 | 0.08 | 1.786084 | 3.1900951  | 22.69145 | 0.03117  | 21.68 |
| 2695   | 2015 | -0.68 | 0.08 | 1.786084 | 3.1900951  | 21.3265  | 0.041871 | 50.91 |
| 990    | 2015 | 0.134 | 0.08 | 1.786084 | 3.1900951  | 21.83204 | 0.056317 | 38.01 |
| 2157   | 2015 | 0.497 | 0.08 | 1.786084 | 3.1900951  | 23.00192 | 0.094573 | 29.01 |
| 600590 | 2015 | 0.035 | 0.08 | 1.786084 | 3.1900951  | 22.69145 | 0.03117  | 21.68 |
| 2087   | 2015 | -0.66 | 0.07 | 0.024382 | 0.0005945  | 22.55055 | 0.057922 | 33    |
| 2714   | 2015 | -0.85 | 0.07 | 0.024382 | 0.0005945  | 22.67878 | 0.169179 | 47.6  |
| 2536   | 2015 | -0.06 | 0.07 | 0.024382 | 0.0005945  | 21.81705 | 0.032775 | 38.62 |
| 2536   | 2015 | -0.12 | 0.07 | 0.024382 | 0.0005945  | 21.81705 | 0.032775 | 38.62 |
| 2087   | 2015 | -0.66 | 0.07 | 0.024382 | 0.0005945  | 22.52477 | 0.057922 | 33    |
| 2536   | 2015 | 0.133 | 0.07 | 0.024382 | 0.0005945  | 21.81705 | 0.032775 | 38.62 |
| 2714   | 2015 | -0.85 | 0.07 | 0.024382 | 0.0005945  | 22.42511 | 0.169179 | 47.6  |
| 2536   | 2015 | -0.22 | 0.07 | 0.024382 | 0.0005945  | 21.81705 | 0.032775 | 38.62 |
| 2189   | 2015 | 0.177 | 0.07 | 0.024382 | 0.0005945  | 20.56182 | 0.026003 | 38.99 |
| 2189   | 2015 | -0.29 | 0.07 | 0.024382 | 0.0005945  | 20.51512 | 0.026003 | 38.99 |
| 2536   | 2015 | -0.54 | 0.07 | 0.024382 | 0.0005945  | 21.81705 | 0.032775 | 38.62 |
| 2536   | 2015 | -0.22 | 0.07 | 0.024382 | 0.0005945  | 21.81705 | 0.032775 | 38.62 |
| 2536   | 2015 | -0.3  | 0.07 | 0.024382 | 0.0005945  | 21.65053 | 0.032775 | 38.62 |
| 2536   | 2015 | -0.41 | 0.07 | 0.024382 | 0.0005945  | 21.81705 | 0.032775 | 38.62 |
| 2189   | 2015 | 0.177 | 0.07 | 0.024382 | 0.0005945  | 20.56182 | 0.026003 | 38.99 |
| 2189   | 2015 | -0.21 | 0.07 | 0.024382 | 0.0005945  | 20.56182 | 0.026003 | 38.99 |
| 2189   | 2015 | -0.29 | 0.07 | 0.024382 | 0.0005945  | 20.56182 | 0.026003 | 38.99 |
| 2536   | 2015 | -0.29 | 0.07 | 0.024382 | 0.0005945  | 21.81705 | 0.032775 | 38.62 |
| 2087   | 2015 | -0.66 | 0.07 | 0.024382 | 0.0005945  | 22.55055 | 0.057922 | 33    |
| 2714   | 2015 | -0.85 | 0.07 | 0.024382 | 0.0005945  | 22.67878 | 0.169179 | 47.6  |
| 2614   | 2015 | -0.54 | 0.11 | 0.048607 | 0.00236267 | 22.09054 | 0.07799  | 27.83 |
| 2228   | 2015 | -0.8  | 0.11 | 0.048607 | 0.00236267 | 21.81626 | 0.076452 | 38.08 |
| 300102 | 2015 | 0.101 | 0.11 | 0.048607 | 0.00236267 | 21.93539 | -0.03679 | 15.92 |
| 300056 | 2015 | -0.17 | 0.11 | 0.048607 | 0.00236267 | 20.88757 | 0.094284 | 19.72 |
| 600549 | 2015 | -0.65 | 0.11 | 0.048607 | 0.00236267 | 23.07569 | -0.07009 | 32.82 |
| 300051 | 2015 | -0.1  | 0.11 | 0.048607 | 0.00236267 | 21.03861 | -0.09434 | 37.82 |
| 300188 | 2015 | 2.141 | 0.11 | 0.048607 | 0.00236267 | 21.51284 | 0.090151 | 27.28 |
| 2228   | 2015 | -0.78 | 0.11 | 0.048607 | 0.00236267 | 21.67705 | 0.076452 | 38.08 |
| 2398   | 2015 | -0    | 0.11 | 0.048607 | 0.00236267 | 21.63056 | 0.100308 | 17.76 |
| 600686 | 2015 | -0.43 | 0.11 | 0.048607 | 0.00236267 | 23.95729 | 0.158388 | 29.12 |
| 300102 | 2015 | 0.245 | 0.11 | 0.048607 | 0.00236267 | 21.93539 | -0.03679 | 15.92 |
| 600815 | 2015 | -0.65 | 0.11 | 0.048607 | 0.00236267 | 22.97644 | -0.30844 | 40.98 |
| 2593   | 2015 | -0.63 | 0.11 | 0.048607 | 0.00236267 | 21.81273 | 0.020027 | 42.01 |
| 600686 | 2015 | -0.23 | 0.11 | 0.048607 | 0.00236267 | 23.95729 | 0.158388 | 29.12 |
| 300056 | 2015 | -0.54 | 0.11 | 0.048607 | 0.00236267 | 20.88757 | 0.094284 | 19.72 |

|        |      |       |      |          |            |          |          |       |
|--------|------|-------|------|----------|------------|----------|----------|-------|
| 2398   | 2015 | -0.26 | 0.11 | 0.048607 | 0.00236267 | 21.63056 | 0.100308 | 17.76 |
| 600549 | 2015 | -0.65 | 0.11 | 0.048607 | 0.00236267 | 23.49505 | -0.07009 | 32.82 |
| 600686 | 2015 | -0.75 | 0.11 | 0.048607 | 0.00236267 | 23.95729 | 0.158388 | 29.12 |
| 701    | 2015 | -0.94 | 0.11 | 0.048607 | 0.00236267 | 23.37658 | 0.029178 | 21.79 |
| 600686 | 2015 | -0.43 | 0.11 | 0.048607 | 0.00236267 | 23.95729 | 0.158388 | 29.12 |
| 2614   | 2015 | -0.3  | 0.11 | 0.048607 | 0.00236267 | 22.09054 | 0.07799  | 27.83 |
| 2593   | 2015 | -0.35 | 0.11 | 0.048607 | 0.00236267 | 21.81273 | 0.020027 | 42.01 |
| 2335   | 2015 | 0.337 | 0.11 | 0.048607 | 0.00236267 | 21.88218 | 0.103023 | 38.35 |
| 2228   | 2015 | -0.89 | 0.11 | 0.048607 | 0.00236267 | 21.81626 | 0.076452 | 38.08 |
| 300056 | 2015 | -0.38 | 0.11 | 0.048607 | 0.00236267 | 20.88757 | 0.094284 | 19.72 |
| 300051 | 2015 | -0.1  | 0.11 | 0.048607 | 0.00236267 | 21.03861 | -0.09434 | 37.82 |
| 300102 | 2015 | 0.245 | 0.11 | 0.048607 | 0.00236267 | 21.82031 | -0.03679 | 15.92 |
| 600686 | 2015 | -0.75 | 0.11 | 0.048607 | 0.00236267 | 23.95729 | 0.158388 | 29.12 |
| 300188 | 2015 | 2.141 | 0.11 | 0.048607 | 0.00236267 | 21.54986 | 0.090151 | 27.28 |
| 2593   | 2015 | -0.63 | 0.11 | 0.048607 | 0.00236267 | 21.81273 | 0.020027 | 42.01 |
| 701    | 2015 | -0.81 | 0.11 | 0.048607 | 0.00236267 | 23.37658 | 0.029178 | 21.79 |
| 2626   | 2015 | 0.212 | 0.11 | 0.048607 | 0.00236267 | 21.74325 | 0.071377 | 35    |
| 600815 | 2015 | -0.55 | 0.11 | 0.048607 | 0.00236267 | 22.97644 | -0.30844 | 40.98 |
| 300188 | 2015 | 1.91  | 0.11 | 0.048607 | 0.00236267 | 21.51284 | 0.090151 | 27.28 |
| 600815 | 2015 | -0.56 | 0.11 | 0.048607 | 0.00236267 | 22.88952 | -0.30844 | 40.98 |
| 300188 | 2015 | 2.141 | 0.11 | 0.048607 | 0.00236267 | 21.51284 | 0.090151 | 27.28 |
| 600549 | 2015 | 0.33  | 0.11 | 0.048607 | 0.00236267 | 23.49505 | -0.07009 | 32.82 |
| 2398   | 2015 | -0    | 0.11 | 0.048607 | 0.00236267 | 21.63056 | 0.100308 | 17.76 |
| 300341 | 2015 | -0.03 | 0.11 | 0.048607 | 0.00236267 | 20.76713 | 0.105188 | 42.85 |
| 2593   | 2015 | -0.19 | 0.11 | 0.048607 | 0.00236267 | 21.81273 | 0.020027 | 42.01 |
| 2398   | 2015 | -0    | 0.11 | 0.048607 | 0.00236267 | 21.63056 | 0.100308 | 17.76 |
| 2398   | 2015 | -0    | 0.11 | 0.048607 | 0.00236267 | 21.63056 | 0.100308 | 17.76 |
| 2729   | 2015 | -0.47 | 0.11 | 0.048607 | 0.00236267 | 20.10336 | 0.076583 | 47.24 |
| 300096 | 2015 | 1.08  | 0.11 | 0.048607 | 0.00236267 | 20.64663 | 0.025652 | 12.79 |
| 2398   | 2015 | -0    | 0.11 | 0.048607 | 0.00236267 | 21.63056 | 0.100308 | 17.76 |
| 2614   | 2015 | -0.54 | 0.11 | 0.048607 | 0.00236267 | 22.09054 | 0.07799  | 27.83 |
| 2398   | 2015 | -0    | 0.11 | 0.048607 | 0.00236267 | 21.63056 | 0.100308 | 17.76 |
| 600549 | 2015 | 0.189 | 0.11 | 0.048607 | 0.00236267 | 23.49505 | -0.07009 | 32.82 |
| 300102 | 2015 | 0.011 | 0.11 | 0.048607 | 0.00236267 | 21.93539 | -0.03679 | 15.92 |
| 2398   | 2015 | -0    | 0.11 | 0.048607 | 0.00236267 | 21.63056 | 0.100308 | 17.76 |
| 2626   | 2015 | 0.346 | 0.11 | 0.048607 | 0.00236267 | 21.74325 | 0.071377 | 35    |
| 2398   | 2015 | -0    | 0.11 | 0.048607 | 0.00236267 | 21.63056 | 0.100308 | 17.76 |
| 600549 | 2015 | 0.33  | 0.11 | 0.048607 | 0.00236267 | 23.49505 | -0.07009 | 32.82 |
| 300102 | 2015 | 0.154 | 0.11 | 0.048607 | 0.00236267 | 21.93539 | -0.03679 | 15.92 |
| 2614   | 2015 | -0.54 | 0.11 | 0.048607 | 0.00236267 | 22.09054 | 0.07799  | 27.83 |
| 300102 | 2015 | -0.35 | 0.11 | 0.048607 | 0.00236267 | 21.93539 | -0.03679 | 15.92 |
| 2614   | 2015 | 0.098 | 0.11 | 0.048607 | 0.00236267 | 21.83018 | 0.07799  | 27.83 |
| 300341 | 2015 | -0.06 | 0.11 | 0.048607 | 0.00236267 | 20.76713 | 0.105188 | 42.85 |
| 300188 | 2015 | 1.91  | 0.11 | 0.048607 | 0.00236267 | 21.51284 | 0.090151 | 27.28 |
| 600549 | 2015 | -0.24 | 0.11 | 0.048607 | 0.00236267 | 23.49505 | -0.07009 | 32.82 |
| 2228   | 2015 | -0.89 | 0.11 | 0.048607 | 0.00236267 | 21.81626 | 0.076452 | 38.08 |
| 300056 | 2015 | 0.172 | 0.11 | 0.048607 | 0.00236267 | 20.88757 | 0.094284 | 19.72 |
| 2626   | 2015 | 0.326 | 0.11 | 0.048607 | 0.00236267 | 21.74325 | 0.071377 | 35    |
| 2626   | 2015 | 0.326 | 0.11 | 0.048607 | 0.00236267 | 21.74325 | 0.071377 | 35    |
| 2335   | 2015 | 0.023 | 0.11 | 0.048607 | 0.00236267 | 21.88218 | 0.103023 | 38.35 |
| 2593   | 2015 | -0.4  | 0.11 | 0.048607 | 0.00236267 | 21.48263 | 0.020027 | 42.01 |
| 600563 | 2015 | -0.52 | 0.11 | 0.048607 | 0.00236267 | 21.53011 | 0.173051 | 37.33 |
| 600686 | 2015 | -0.75 | 0.11 | 0.048607 | 0.00236267 | 23.95729 | 0.158388 | 29.12 |
| 2398   | 2015 | -0.49 | 0.11 | 0.048607 | 0.00236267 | 21.63056 | 0.100308 | 17.76 |

|        |      |       |      |          |            |          |          |       |
|--------|------|-------|------|----------|------------|----------|----------|-------|
| 2335   | 2015 | 0.337 | 0.11 | 0.048607 | 0.00236267 | 21.88218 | 0.103023 | 38.35 |
| 600563 | 2015 | -0.52 | 0.11 | 0.048607 | 0.00236267 | 21.53011 | 0.173051 | 37.33 |
| 2335   | 2015 | -0.07 | 0.11 | 0.048607 | 0.00236267 | 21.88218 | 0.103023 | 38.35 |
| 600686 | 2015 | -0.53 | 0.11 | 0.048607 | 0.00236267 | 23.95729 | 0.158388 | 29.12 |
| 600815 | 2015 | -0.55 | 0.11 | 0.048607 | 0.00236267 | 22.97644 | -0.30844 | 40.98 |
| 2228   | 2015 | -0.79 | 0.11 | 0.048607 | 0.00236267 | 21.81626 | 0.076452 | 38.08 |
| 600686 | 2015 | -0.4  | 0.11 | 0.048607 | 0.00236267 | 23.95729 | 0.158388 | 29.12 |
| 2228   | 2015 | -0.89 | 0.11 | 0.048607 | 0.00236267 | 21.81626 | 0.076452 | 38.08 |
| 2335   | 2015 | 0.337 | 0.11 | 0.048607 | 0.00236267 | 21.88218 | 0.103023 | 38.35 |
| 600549 | 2015 | -0.11 | 0.11 | 0.048607 | 0.00236267 | 23.49505 | -0.07009 | 32.82 |
| 600549 | 2015 | 0.008 | 0.11 | 0.048607 | 0.00236267 | 23.49505 | -0.07009 | 32.82 |
| 701    | 2015 | -0.85 | 0.11 | 0.048607 | 0.00236267 | 23.37658 | 0.029178 | 21.79 |
| 2398   | 2015 | 0.686 | 0.11 | 0.048607 | 0.00236267 | 21.63056 | 0.100308 | 17.76 |
| 300341 | 2015 | -0.03 | 0.11 | 0.048607 | 0.00236267 | 20.76713 | 0.105188 | 42.85 |
| 300096 | 2015 | 0.541 | 0.11 | 0.048607 | 0.00236267 | 20.64663 | 0.025652 | 12.79 |
| 600815 | 2015 | -0.55 | 0.11 | 0.048607 | 0.00236267 | 22.97644 | -0.30844 | 40.98 |
| 300096 | 2015 | 0.965 | 0.11 | 0.048607 | 0.00236267 | 20.64663 | 0.025652 | 12.79 |
| 2335   | 2015 | -0.03 | 0.11 | 0.048607 | 0.00236267 | 21.88218 | 0.103023 | 38.35 |
| 2614   | 2015 | -0.44 | 0.11 | 0.048607 | 0.00236267 | 22.09054 | 0.07799  | 27.83 |
| 701    | 2015 | -0.85 | 0.11 | 0.048607 | 0.00236267 | 23.09733 | 0.029178 | 21.79 |
| 2614   | 2015 | -0.54 | 0.11 | 0.048607 | 0.00236267 | 22.09054 | 0.07799  | 27.83 |
| 600549 | 2015 | -0.3  | 0.11 | 0.048607 | 0.00236267 | 23.49505 | -0.07009 | 32.82 |
| 2398   | 2015 | 0.686 | 0.11 | 0.048607 | 0.00236267 | 21.63056 | 0.100308 | 17.76 |
| 600686 | 2015 | 0.127 | 0.11 | 0.048607 | 0.00236267 | 23.95729 | 0.158388 | 29.12 |
| 300102 | 2015 | 0.158 | 0.11 | 0.048607 | 0.00236267 | 21.93539 | -0.03679 | 15.92 |
| 600815 | 2015 | -0.55 | 0.11 | 0.048607 | 0.00236267 | 22.97644 | -0.30844 | 40.98 |
| 300188 | 2015 | 1.836 | 0.11 | 0.048607 | 0.00236267 | 21.51284 | 0.090151 | 27.28 |
| 600815 | 2015 | -0.65 | 0.11 | 0.048607 | 0.00236267 | 22.97644 | -0.30844 | 40.98 |
| 2593   | 2015 | -0.63 | 0.11 | 0.048607 | 0.00236267 | 21.81273 | 0.020027 | 42.01 |
| 600563 | 2015 | -0.52 | 0.11 | 0.048607 | 0.00236267 | 21.53011 | 0.173051 | 37.33 |
| 2335   | 2015 | 0.337 | 0.11 | 0.048607 | 0.00236267 | 21.59804 | 0.103023 | 38.35 |
| 2614   | 2015 | -0.46 | 0.11 | 0.048607 | 0.00236267 | 22.09054 | 0.07799  | 27.83 |
| 300051 | 2015 | -0.1  | 0.11 | 0.048607 | 0.00236267 | 21.03861 | -0.09434 | 37.82 |
| 600549 | 2015 | -0.26 | 0.11 | 0.048607 | 0.00236267 | 23.49505 | -0.07009 | 32.82 |
| 2729   | 2015 | -0.47 | 0.11 | 0.048607 | 0.00236267 | 20.10336 | 0.076583 | 47.24 |
| 2614   | 2015 | -0.3  | 0.11 | 0.048607 | 0.00236267 | 22.09054 | 0.07799  | 27.83 |
| 2398   | 2015 | -0.43 | 0.11 | 0.048607 | 0.00236267 | 21.63056 | 0.100308 | 17.76 |
| 2626   | 2015 | 0.364 | 0.11 | 0.048607 | 0.00236267 | 21.74325 | 0.071377 | 35    |
| 300102 | 2015 | 0.011 | 0.11 | 0.048607 | 0.00236267 | 21.93539 | -0.03679 | 15.92 |
| 2729   | 2015 | -0.47 | 0.11 | 0.048607 | 0.00236267 | 20.10336 | 0.076583 | 47.24 |
| 300051 | 2015 | -0.1  | 0.11 | 0.048607 | 0.00236267 | 20.73526 | -0.09434 | 37.82 |
| 300056 | 2015 | -0.54 | 0.11 | 0.048607 | 0.00236267 | 20.88757 | 0.094284 | 19.72 |
| 600549 | 2015 | 0.008 | 0.11 | 0.048607 | 0.00236267 | 23.49505 | -0.07009 | 32.82 |
| 600686 | 2015 | -0.75 | 0.11 | 0.048607 | 0.00236267 | 23.95729 | 0.158388 | 29.12 |
| 2228   | 2015 | -0.67 | 0.11 | 0.048607 | 0.00236267 | 21.81626 | 0.076452 | 38.08 |
| 600549 | 2015 | -0.39 | 0.11 | 0.048607 | 0.00236267 | 23.49505 | -0.07009 | 32.82 |
| 2398   | 2015 | 0.196 | 0.11 | 0.048607 | 0.00236267 | 20.98596 | 0.100308 | 17.76 |
| 2626   | 2015 | 0.364 | 0.11 | 0.048607 | 0.00236267 | 20.93998 | 0.071377 | 35    |
| 300056 | 2015 | -0.54 | 0.11 | 0.048607 | 0.00236267 | 21.14739 | 0.094284 | 19.72 |
| 2335   | 2015 | -0.08 | 0.11 | 0.048607 | 0.00236267 | 21.88218 | 0.103023 | 38.35 |
| 2593   | 2015 | -0.37 | 0.11 | 0.048607 | 0.00236267 | 21.81273 | 0.020027 | 42.01 |
| 2729   | 2015 | -0.47 | 0.11 | 0.048607 | 0.00236267 | 20.10336 | 0.076583 | 47.24 |
| 2593   | 2015 | -0.63 | 0.11 | 0.048607 | 0.00236267 | 21.81273 | 0.020027 | 42.01 |
| 600686 | 2015 | -0.75 | 0.11 | 0.048607 | 0.00236267 | 23.95729 | 0.158388 | 29.12 |



|        |      |       |      |          |            |          |          |       |
|--------|------|-------|------|----------|------------|----------|----------|-------|
| 300096 | 2015 | 0.541 | 0.11 | 0.048607 | 0.00236267 | 20.64663 | 0.025652 | 12.79 |
| 701    | 2015 | -0.85 | 0.11 | 0.048607 | 0.00236267 | 23.37658 | 0.029178 | 21.79 |
| 300051 | 2015 | -0.1  | 0.11 | 0.048607 | 0.00236267 | 21.03861 | -0.09434 | 37.82 |
| 300188 | 2015 | 1.836 | 0.11 | 0.048607 | 0.00236267 | 21.51284 | 0.090151 | 27.28 |
| 300341 | 2015 | -0.06 | 0.11 | 0.048607 | 0.00236267 | 20.76713 | 0.105188 | 42.85 |
| 600686 | 2015 | -0.43 | 0.11 | 0.048607 | 0.00236267 | 21.8346  | 0.158388 | 29.12 |
| 600549 | 2015 | 0.008 | 0.11 | 0.048607 | 0.00236267 | 23.49505 | -0.07009 | 32.82 |
| 2614   | 2015 | -0.46 | 0.11 | 0.048607 | 0.00236267 | 22.09054 | 0.07799  | 27.83 |
| 300056 | 2015 | 0.172 | 0.11 | 0.048607 | 0.00236267 | 20.88757 | 0.094284 | 19.72 |
| 300051 | 2015 | -0.1  | 0.11 | 0.048607 | 0.00236267 | 21.03861 | -0.09434 | 37.82 |
| 600815 | 2015 | -0.65 | 0.11 | 0.048607 | 0.00236267 | 22.97644 | -0.30844 | 40.98 |
| 300056 | 2015 | -0.38 | 0.11 | 0.048607 | 0.00236267 | 20.88757 | 0.094284 | 19.72 |
| 2228   | 2015 | -0.89 | 0.11 | 0.048607 | 0.00236267 | 21.81626 | 0.076452 | 38.08 |
| 300341 | 2015 | -0.04 | 0.11 | 0.048607 | 0.00236267 | 20.58177 | 0.105188 | 42.85 |
| 600549 | 2015 | 0.008 | 0.11 | 0.048607 | 0.00236267 | 23.49505 | -0.07009 | 32.82 |
| 300056 | 2015 | -0.54 | 0.11 | 0.048607 | 0.00236267 | 20.88757 | 0.094284 | 19.72 |
| 600563 | 2015 | -0.52 | 0.11 | 0.048607 | 0.00236267 | 21.4765  | 0.173051 | 37.33 |
| 2398   | 2015 | -0    | 0.11 | 0.048607 | 0.00236267 | 21.63056 | 0.100308 | 17.76 |
| 300096 | 2015 | 1.08  | 0.11 | 0.048607 | 0.00236267 | 20.64663 | 0.025652 | 12.79 |
| 701    | 2015 | -0.81 | 0.11 | 0.048607 | 0.00236267 | 23.37658 | 0.029178 | 21.79 |
| 2593   | 2015 | -0.41 | 0.11 | 0.048607 | 0.00236267 | 21.81273 | 0.020027 | 42.01 |
| 2335   | 2015 | -0.22 | 0.11 | 0.048607 | 0.00236267 | 21.88218 | 0.103023 | 38.35 |
| 2335   | 2015 | 0.023 | 0.11 | 0.048607 | 0.00236267 | 21.88218 | 0.103023 | 38.35 |
| 600815 | 2015 | -0.65 | 0.11 | 0.048607 | 0.00236267 | 22.97644 | -0.30844 | 40.98 |
| 600563 | 2015 | -0.52 | 0.11 | 0.048607 | 0.00236267 | 21.53011 | 0.173051 | 37.33 |
| 600549 | 2015 | 0.189 | 0.11 | 0.048607 | 0.00236267 | 23.49505 | -0.07009 | 32.82 |
| 2729   | 2015 | -0.47 | 0.11 | 0.048607 | 0.00236267 | 20.10336 | 0.076583 | 47.24 |
| 600815 | 2015 | -0.65 | 0.11 | 0.048607 | 0.00236267 | 22.97644 | -0.30844 | 40.98 |
| 300096 | 2015 | 1.08  | 0.11 | 0.048607 | 0.00236267 | 20.39293 | 0.025652 | 12.79 |
| 2626   | 2015 | 0.441 | 0.11 | 0.048607 | 0.00236267 | 21.74325 | 0.071377 | 35    |
| 300009 | 2015 | 0.388 | 0.09 | 0.8232   | 0.67765891 | 20.90595 | 0.104732 | 27.88 |
| 600444 | 2015 | 0.321 | 0.09 | 0.8232   | 0.67765891 | 20.58844 | 0.088249 | 36.82 |
| 600983 | 2015 | -0.2  | 0.09 | 0.8232   | 0.67765891 | 22.80372 | 0.082785 | 51    |
| 600761 | 2015 | -0.1  | 0.09 | 0.8232   | 0.67765891 | 22.46934 | 0.101982 | 37.97 |
| 300274 | 2015 | 0.291 | 0.09 | 0.8232   | 0.67765891 | 22.6377  | 0.150262 | 37.91 |
| 600418 | 2015 | -0.08 | 0.09 | 0.8232   | 0.67765891 | 24.08725 | 0.084658 | 30.47 |
| 713    | 2015 | 0.72  | 0.09 | 0.8232   | 0.67765891 | 21.40134 | 0.022344 | 34.11 |
| 600418 | 2015 | -0.3  | 0.09 | 0.8232   | 0.67765891 | 24.08725 | 0.084658 | 30.47 |
| 713    | 2015 | 0.446 | 0.09 | 0.8232   | 0.67765891 | 21.34538 | 0.022344 | 34.11 |
| 600444 | 2015 | 0.38  | 0.09 | 0.8232   | 0.67765891 | 20.58844 | 0.088249 | 36.82 |
| 2230   | 2015 | 2.071 | 0.09 | 0.8232   | 0.67765891 | 22.85035 | 0.066928 | 13.93 |
| 600418 | 2015 | -0.4  | 0.09 | 0.8232   | 0.67765891 | 24.08725 | 0.084658 | 30.47 |
| 2230   | 2015 | 2.601 | 0.09 | 0.8232   | 0.67765891 | 22.85035 | 0.066928 | 13.93 |
| 868    | 2015 | -0.4  | 0.09 | 0.8232   | 0.67765891 | 22.54387 | 0.00761  | 21.13 |
| 600418 | 2015 | 0.102 | 0.09 | 0.8232   | 0.67765891 | 24.08725 | 0.084658 | 30.47 |
| 300274 | 2015 | 0.011 | 0.09 | 0.8232   | 0.67765891 | 22.6377  | 0.150262 | 37.91 |
| 600990 | 2015 | 0.045 | 0.09 | 0.8232   | 0.67765891 | 21.88534 | 0.114138 | 39.66 |
| 603308 | 2015 | 0.213 | 0.09 | 0.8232   | 0.67765891 | 22.31999 | 0.03934  | 33.18 |
| 2230   | 2015 | 2.432 | 0.09 | 0.8232   | 0.67765891 | 22.85035 | 0.066928 | 13.93 |
| 300247 | 2015 | -0.37 | 0.09 | 0.8232   | 0.67765891 | 21.38158 | 0.027946 | 17.12 |
| 300274 | 2015 | 0.291 | 0.09 | 0.8232   | 0.67765891 | 22.6377  | 0.150262 | 37.91 |
| 2230   | 2015 | 1.938 | 0.09 | 0.8232   | 0.67765891 | 22.85035 | 0.066928 | 13.93 |
| 2140   | 2015 | 0.352 | 0.09 | 0.8232   | 0.67765891 | 22.47131 | 0.090687 | 58.33 |
| 2230   | 2015 | 2.143 | 0.09 | 0.8232   | 0.67765891 | 22.85035 | 0.066928 | 13.93 |

|        |      |       |      |        |            |          |          |       |
|--------|------|-------|------|--------|------------|----------|----------|-------|
| 300247 | 2015 | -0.2  | 0.09 | 0.8232 | 0.67765891 | 21.38158 | 0.027946 | 17.12 |
| 600418 | 2015 | 0.036 | 0.09 | 0.8232 | 0.67765891 | 24.08725 | 0.084658 | 30.47 |
| 600063 | 2015 | -0.2  | 0.09 | 0.8232 | 0.67765891 | 22.73062 | 0.029768 | 35.12 |
| 300218 | 2015 | -0.18 | 0.09 | 0.8232 | 0.67765891 | 21.25921 | 0.06037  | 22.18 |
| 300218 | 2015 | 0.242 | 0.09 | 0.8232 | 0.67765891 | 21.31584 | 0.06037  | 22.18 |
| 600063 | 2015 | -0.21 | 0.09 | 0.8232 | 0.67765891 | 22.73062 | 0.029768 | 35.12 |
| 600418 | 2015 | -0.16 | 0.09 | 0.8232 | 0.67765891 | 24.08725 | 0.084658 | 30.47 |
| 300274 | 2015 | 0.291 | 0.09 | 0.8232 | 0.67765891 | 22.63062 | 0.150262 | 37.91 |
| 600418 | 2015 | -0.14 | 0.09 | 0.8232 | 0.67765891 | 24.08725 | 0.084658 | 30.47 |
| 2690   | 2015 | 0.35  | 0.09 | 0.8232 | 0.67765891 | 21.49942 | 0.149122 | 61.45 |
| 2230   | 2015 | 2.562 | 0.09 | 0.8232 | 0.67765891 | 22.85035 | 0.066928 | 13.93 |
| 600418 | 2015 | -0.2  | 0.09 | 0.8232 | 0.67765891 | 24.08725 | 0.084658 | 30.47 |
| 603308 | 2015 | -0.12 | 0.09 | 0.8232 | 0.67765891 | 22.31999 | 0.03934  | 33.18 |
| 600418 | 2015 | -0.08 | 0.09 | 0.8232 | 0.67765891 | 24.08725 | 0.084658 | 30.47 |
| 2541   | 2015 | -0.64 | 0.09 | 0.8232 | 0.67765891 | 22.68097 | 0.070092 | 48.24 |
| 2140   | 2015 | 0.555 | 0.09 | 0.8232 | 0.67765891 | 22.47131 | 0.090687 | 58.33 |
| 859    | 2015 | 0.001 | 0.09 | 0.8232 | 0.67765891 | 21.38496 | 0.002853 | 23.76 |
| 300247 | 2015 | -0.46 | 0.09 | 0.8232 | 0.67765891 | 21.38158 | 0.027946 | 17.12 |
| 713    | 2015 | 0.279 | 0.09 | 0.8232 | 0.67765891 | 21.34538 | 0.022344 | 34.11 |
| 300247 | 2015 | -0.37 | 0.09 | 0.8232 | 0.67765891 | 21.38158 | 0.027946 | 17.12 |
| 2331   | 2015 | 0.351 | 0.09 | 0.8232 | 0.67765891 | 21.30416 | 0.05904  | 10    |
| 868    | 2015 | -0.58 | 0.09 | 0.8232 | 0.67765891 | 22.54387 | 0.00761  | 21.13 |
| 300218 | 2015 | -0.26 | 0.09 | 0.8232 | 0.67765891 | 21.31584 | 0.06037  | 22.18 |
| 2557   | 2015 | -0.13 | 0.09 | 0.8232 | 0.67765891 | 22.18133 | 0.124573 | 49.95 |
| 600063 | 2015 | -0.2  | 0.09 | 0.8232 | 0.67765891 | 22.73062 | 0.029768 | 35.12 |
| 300218 | 2015 | 0.242 | 0.09 | 0.8232 | 0.67765891 | 21.31584 | 0.06037  | 22.18 |
| 521    | 2015 | -0.27 | 0.09 | 0.8232 | 0.67765891 | 22.73923 | 0.006205 | 21.58 |
| 300388 | 2015 | -0.09 | 0.09 | 0.8232 | 0.67765891 | 22.10346 | 0.088904 | 41.91 |
| 600418 | 2015 | -0.4  | 0.09 | 0.8232 | 0.67765891 | 24.08725 | 0.084658 | 30.47 |
| 2331   | 2015 | 1.436 | 0.09 | 0.8232 | 0.67765891 | 21.13791 | 0.05904  | 10    |
| 2140   | 2015 | 0.289 | 0.09 | 0.8232 | 0.67765891 | 22.45077 | 0.090687 | 58.33 |
| 600990 | 2015 | -0.09 | 0.09 | 0.8232 | 0.67765891 | 21.76954 | 0.114138 | 39.66 |
| 2541   | 2015 | -0.37 | 0.09 | 0.8232 | 0.67765891 | 22.68097 | 0.070092 | 48.24 |
| 2690   | 2015 | 0.35  | 0.09 | 0.8232 | 0.67765891 | 21.50061 | 0.149122 | 61.45 |
| 600761 | 2015 | -0.34 | 0.09 | 0.8232 | 0.67765891 | 22.46934 | 0.101982 | 37.97 |
| 600418 | 2015 | 0.102 | 0.09 | 0.8232 | 0.67765891 | 24.08725 | 0.084658 | 30.47 |
| 300388 | 2015 | -0.09 | 0.09 | 0.8232 | 0.67765891 | 22.10346 | 0.088904 | 41.91 |
| 600418 | 2015 | 0.102 | 0.09 | 0.8232 | 0.67765891 | 24.08725 | 0.084658 | 30.47 |
| 2230   | 2015 | 1.595 | 0.09 | 0.8232 | 0.67765891 | 22.85035 | 0.066928 | 13.93 |
| 868    | 2015 | -0.58 | 0.09 | 0.8232 | 0.67765891 | 22.54387 | 0.00761  | 21.13 |
| 603011 | 2015 | 0.053 | 0.09 | 0.8232 | 0.67765891 | 20.6553  | 0.046617 | 41.03 |
| 868    | 2015 | -0.58 | 0.09 | 0.8232 | 0.67765891 | 22.54387 | 0.00761  | 21.13 |
| 300009 | 2015 | -0.05 | 0.09 | 0.8232 | 0.67765891 | 20.90595 | 0.104732 | 27.88 |
| 600063 | 2015 | -0.2  | 0.09 | 0.8232 | 0.67765891 | 22.71182 | 0.029768 | 35.12 |
| 600418 | 2015 | 0.102 | 0.09 | 0.8232 | 0.67765891 | 24.08725 | 0.084658 | 30.47 |
| 600444 | 2015 | 0.371 | 0.09 | 0.8232 | 0.67765891 | 20.58844 | 0.088249 | 36.82 |
| 300388 | 2015 | -0.09 | 0.09 | 0.8232 | 0.67765891 | 22.10346 | 0.088904 | 41.91 |
| 603011 | 2015 | 0.11  | 0.09 | 0.8232 | 0.67765891 | 20.6553  | 0.046617 | 41.03 |
| 2230   | 2015 | 2.432 | 0.09 | 0.8232 | 0.67765891 | 22.58007 | 0.066928 | 13.93 |
| 300388 | 2015 | -0    | 0.09 | 0.8232 | 0.67765891 | 22.10346 | 0.088904 | 41.91 |
| 521    | 2015 | -0.52 | 0.09 | 0.8232 | 0.67765891 | 22.73923 | 0.006205 | 21.58 |
| 2140   | 2015 | 0.141 | 0.09 | 0.8232 | 0.67765891 | 22.47131 | 0.090687 | 58.33 |
| 600418 | 2015 | 0.102 | 0.09 | 0.8232 | 0.67765891 | 24.08725 | 0.084658 | 30.47 |
| 2230   | 2015 | 1.478 | 0.09 | 0.8232 | 0.67765891 | 22.85035 | 0.066928 | 13.93 |

|        |      |       |      |        |            |          |          |       |
|--------|------|-------|------|--------|------------|----------|----------|-------|
| 300009 | 2015 | 0.521 | 0.09 | 0.8232 | 0.67765891 | 21.06066 | 0.104732 | 27.88 |
| 600418 | 2015 | 0.036 | 0.09 | 0.8232 | 0.67765891 | 24.08725 | 0.084658 | 30.47 |
| 2140   | 2015 | 0.289 | 0.09 | 0.8232 | 0.67765891 | 22.47131 | 0.090687 | 58.33 |
| 600063 | 2015 | -0.21 | 0.09 | 0.8232 | 0.67765891 | 22.73062 | 0.029768 | 35.12 |
| 868    | 2015 | -0.58 | 0.09 | 0.8232 | 0.67765891 | 22.54387 | 0.00761  | 21.13 |
| 2541   | 2015 | -0.64 | 0.09 | 0.8232 | 0.67765891 | 22.68097 | 0.070092 | 48.24 |
| 600444 | 2015 | 0.38  | 0.09 | 0.8232 | 0.67765891 | 20.52774 | 0.088249 | 36.82 |
| 300087 | 2015 | 0.841 | 0.09 | 0.8232 | 0.67765891 | 20.26593 | 0.054548 | 9.49  |
| 300388 | 2015 | -0.09 | 0.09 | 0.8232 | 0.67765891 | 22.10346 | 0.088904 | 41.91 |
| 859    | 2015 | -0.21 | 0.09 | 0.8232 | 0.67765891 | 21.38496 | 0.002853 | 23.76 |
| 600761 | 2015 | -0.31 | 0.09 | 0.8232 | 0.67765891 | 22.46934 | 0.101982 | 37.97 |
| 600418 | 2015 | 0.102 | 0.09 | 0.8232 | 0.67765891 | 24.08725 | 0.084658 | 30.47 |
| 2331   | 2015 | 0.431 | 0.09 | 0.8232 | 0.67765891 | 21.13791 | 0.05904  | 10    |
| 300009 | 2015 | -0.46 | 0.09 | 0.8232 | 0.67765891 | 20.90595 | 0.104732 | 27.88 |
| 600418 | 2015 | 0.102 | 0.09 | 0.8232 | 0.67765891 | 24.08725 | 0.084658 | 30.47 |
| 2230   | 2015 | 1.478 | 0.09 | 0.8232 | 0.67765891 | 22.85035 | 0.066928 | 13.93 |
| 2557   | 2015 | -0.13 | 0.09 | 0.8232 | 0.67765891 | 22.24514 | 0.124573 | 49.95 |
| 600761 | 2015 | -0.54 | 0.09 | 0.8232 | 0.67765891 | 22.46934 | 0.101982 | 37.97 |
| 2331   | 2015 | 0.112 | 0.09 | 0.8232 | 0.67765891 | 21.13791 | 0.05904  | 10    |
| 300087 | 2015 | 0.703 | 0.09 | 0.8232 | 0.67765891 | 20.26593 | 0.054548 | 9.49  |
| 300087 | 2015 | 0.841 | 0.09 | 0.8232 | 0.67765891 | 20.26593 | 0.054548 | 9.49  |
| 2331   | 2015 | 1.436 | 0.09 | 0.8232 | 0.67765891 | 21.13791 | 0.05904  | 10    |
| 603308 | 2015 | -0.12 | 0.09 | 0.8232 | 0.67765891 | 22.31999 | 0.03934  | 33.18 |
| 300388 | 2015 | -0.15 | 0.09 | 0.8232 | 0.67765891 | 22.10346 | 0.088904 | 41.91 |
| 300009 | 2015 | 0.521 | 0.09 | 0.8232 | 0.67765891 | 20.90595 | 0.104732 | 27.88 |
| 713    | 2015 | 0.418 | 0.09 | 0.8232 | 0.67765891 | 21.34538 | 0.022344 | 34.11 |
| 2331   | 2015 | 0.857 | 0.09 | 0.8232 | 0.67765891 | 21.13791 | 0.05904  | 10    |
| 600983 | 2015 | -0.2  | 0.09 | 0.8232 | 0.67765891 | 22.80373 | 0.082785 | 51    |
| 868    | 2015 | -0.35 | 0.09 | 0.8232 | 0.67765891 | 22.54387 | 0.00761  | 21.13 |
| 600063 | 2015 | -0.2  | 0.09 | 0.8232 | 0.67765891 | 22.73062 | 0.029768 | 35.12 |
| 600990 | 2015 | 0.052 | 0.09 | 0.8232 | 0.67765891 | 21.88534 | 0.114138 | 39.66 |
| 600990 | 2015 | -0.09 | 0.09 | 0.8232 | 0.67765891 | 21.88534 | 0.114138 | 39.66 |
| 600761 | 2015 | -0.15 | 0.09 | 0.8232 | 0.67765891 | 22.46934 | 0.101982 | 37.97 |
| 2230   | 2015 | 2.38  | 0.09 | 0.8232 | 0.67765891 | 22.85035 | 0.066928 | 13.93 |
| 300247 | 2015 | -0.46 | 0.09 | 0.8232 | 0.67765891 | 21.38158 | 0.027946 | 17.12 |
| 600418 | 2015 | 0.013 | 0.09 | 0.8232 | 0.67765891 | 24.08725 | 0.084658 | 30.47 |
| 300388 | 2015 | -0.15 | 0.09 | 0.8232 | 0.67765891 | 21.70419 | 0.088904 | 41.91 |
| 300388 | 2015 | -0.09 | 0.09 | 0.8232 | 0.67765891 | 22.10346 | 0.088904 | 41.91 |
| 600418 | 2015 | -0.52 | 0.09 | 0.8232 | 0.67765891 | 24.08725 | 0.084658 | 30.47 |
| 600990 | 2015 | 0.052 | 0.09 | 0.8232 | 0.67765891 | 21.88534 | 0.114138 | 39.66 |
| 521    | 2015 | -0.32 | 0.09 | 0.8232 | 0.67765891 | 22.92782 | 0.006205 | 21.58 |
| 868    | 2015 | -0.4  | 0.09 | 0.8232 | 0.67765891 | 22.54387 | 0.00761  | 21.13 |
| 2541   | 2015 | -0.47 | 0.09 | 0.8232 | 0.67765891 | 22.44673 | 0.070092 | 48.24 |
| 521    | 2015 | -0.13 | 0.09 | 0.8232 | 0.67765891 | 22.92782 | 0.006205 | 21.58 |
| 300087 | 2015 | 0.669 | 0.09 | 0.8232 | 0.67765891 | 20.26593 | 0.054548 | 9.49  |
| 600418 | 2015 | 0.013 | 0.09 | 0.8232 | 0.67765891 | 24.08725 | 0.084658 | 30.47 |
| 603308 | 2015 | 0.048 | 0.09 | 0.8232 | 0.67765891 | 22.31999 | 0.03934  | 33.18 |
| 859    | 2015 | 0.088 | 0.09 | 0.8232 | 0.67765891 | 21.38496 | 0.002853 | 23.76 |
| 300274 | 2015 | 0.009 | 0.09 | 0.8232 | 0.67765891 | 22.6377  | 0.150262 | 37.91 |
| 2230   | 2015 | 2.601 | 0.09 | 0.8232 | 0.67765891 | 22.85035 | 0.066928 | 13.93 |
| 859    | 2015 | -0.01 | 0.09 | 0.8232 | 0.67765891 | 21.28808 | 0.002853 | 23.76 |
| 300087 | 2015 | 0.669 | 0.09 | 0.8232 | 0.67765891 | 20.82564 | 0.054548 | 9.49  |
| 600418 | 2015 | -0.36 | 0.09 | 0.8232 | 0.67765891 | 24.08725 | 0.084658 | 30.47 |
| 603011 | 2015 | 0.1   | 0.09 | 0.8232 | 0.67765891 | 20.6553  | 0.046617 | 41.03 |

|        |      |       |      |          |            |          |          |       |
|--------|------|-------|------|----------|------------|----------|----------|-------|
| 603308 | 2015 | 0.213 | 0.09 | 0.8232   | 0.67765891 | 22.31999 | 0.03934  | 33.18 |
| 600983 | 2015 | -0.2  | 0.09 | 0.8232   | 0.67765891 | 22.80373 | 0.082785 | 51    |
| 600418 | 2015 | -0.14 | 0.09 | 0.8232   | 0.67765891 | 24.38436 | 0.084658 | 30.47 |
| 2230   | 2015 | 1.478 | 0.09 | 0.8232   | 0.67765891 | 22.85035 | 0.066928 | 13.93 |
| 2557   | 2015 | -0.13 | 0.09 | 0.8232   | 0.67765891 | 22.24514 | 0.124573 | 49.95 |
| 300274 | 2015 | 0.009 | 0.09 | 0.8232   | 0.67765891 | 22.6377  | 0.150262 | 37.91 |
| 600761 | 2015 | -0.1  | 0.09 | 0.8232   | 0.67765891 | 22.46934 | 0.101982 | 37.97 |
| 2541   | 2015 | -0.37 | 0.09 | 0.8232   | 0.67765891 | 22.68097 | 0.070092 | 48.24 |
| 859    | 2015 | -0.02 | 0.09 | 0.8232   | 0.67765891 | 21.38496 | 0.002853 | 23.76 |
| 2230   | 2015 | 1.478 | 0.09 | 0.8232   | 0.67765891 | 22.85035 | 0.066928 | 13.93 |
| 2230   | 2015 | 1.478 | 0.09 | 0.8232   | 0.67765891 | 22.85035 | 0.066928 | 13.93 |
| 600983 | 2015 | -0.2  | 0.09 | 0.8232   | 0.67765891 | 22.80373 | 0.082785 | 51    |
| 600418 | 2015 | -0    | 0.09 | 0.8232   | 0.67765891 | 24.08725 | 0.084658 | 30.47 |
| 600063 | 2015 | -0.21 | 0.09 | 0.8232   | 0.67765891 | 22.73062 | 0.029768 | 35.12 |
| 859    | 2015 | 0.001 | 0.09 | 0.8232   | 0.67765891 | 21.38496 | 0.002853 | 23.76 |
| 300009 | 2015 | 0.014 | 0.09 | 0.8232   | 0.67765891 | 20.90595 | 0.104732 | 27.88 |
| 603308 | 2015 | 0.213 | 0.09 | 0.8232   | 0.67765891 | 21.9452  | 0.03934  | 33.18 |
| 300247 | 2015 | -0.3  | 0.09 | 0.8232   | 0.67765891 | 21.38158 | 0.027946 | 17.12 |
| 521    | 2015 | -0.52 | 0.09 | 0.8232   | 0.67765891 | 22.92782 | 0.006205 | 21.58 |
| 600444 | 2015 | 0.321 | 0.09 | 0.8232   | 0.67765891 | 20.58844 | 0.088249 | 36.82 |
| 868    | 2015 | -0.58 | 0.09 | 0.8232   | 0.67765891 | 22.30979 | 0.00761  | 21.13 |
| 600761 | 2015 | -0.34 | 0.09 | 0.8232   | 0.67765891 | 22.35282 | 0.101982 | 37.97 |
| 2541   | 2015 | -0.37 | 0.09 | 0.8232   | 0.67765891 | 22.68097 | 0.070092 | 48.24 |
| 300388 | 2015 | -0.09 | 0.09 | 0.8232   | 0.67765891 | 22.10346 | 0.088904 | 41.91 |
| 713    | 2015 | 0.308 | 0.09 | 0.8232   | 0.67765891 | 21.34538 | 0.022344 | 34.11 |
| 713    | 2015 | 0.279 | 0.09 | 0.8232   | 0.67765891 | 21.34538 | 0.022344 | 34.11 |
| 600418 | 2015 | -0.12 | 0.09 | 0.8232   | 0.67765891 | 24.08725 | 0.084658 | 30.47 |
| 521    | 2015 | -0.32 | 0.09 | 0.8232   | 0.67765891 | 22.92782 | 0.006205 | 21.58 |
| 300218 | 2015 | 0.242 | 0.09 | 0.8232   | 0.67765891 | 21.31584 | 0.06037  | 22.18 |
| 2140   | 2015 | 0.478 | 0.09 | 0.8232   | 0.67765891 | 22.47131 | 0.090687 | 58.33 |
| 300247 | 2015 | -0.36 | 0.09 | 0.8232   | 0.67765891 | 21.38158 | 0.027946 | 17.12 |
| 2690   | 2015 | 0.35  | 0.09 | 0.8232   | 0.67765891 | 21.49942 | 0.149122 | 61.45 |
| 521    | 2015 | -0.31 | 0.09 | 0.8232   | 0.67765891 | 22.92782 | 0.006205 | 21.58 |
| 600418 | 2015 | -0.34 | 0.09 | 0.8232   | 0.67765891 | 24.08725 | 0.084658 | 30.47 |
| 300218 | 2015 | -0.26 | 0.09 | 0.8232   | 0.67765891 | 21.31584 | 0.06037  | 22.18 |
| 603011 | 2015 | 0.1   | 0.09 | 0.8232   | 0.67765891 | 20.6553  | 0.046617 | 41.03 |
| 521    | 2015 | -0.46 | 0.09 | 0.8232   | 0.67765891 | 22.92782 | 0.006205 | 21.58 |
| 300247 | 2015 | -0.46 | 0.09 | 0.8232   | 0.67765891 | 21.27968 | 0.027946 | 17.12 |
| 600418 | 2015 | -0.22 | 0.09 | 0.8232   | 0.67765891 | 24.08725 | 0.084658 | 30.47 |
| 2230   | 2015 | 1.655 | 0.09 | 0.8232   | 0.67765891 | 22.85035 | 0.066928 | 13.93 |
| 859    | 2015 | 0.01  | 0.09 | 0.8232   | 0.67765891 | 21.38496 | 0.002853 | 23.76 |
| 600063 | 2015 | -0.2  | 0.09 | 0.8232   | 0.67765891 | 22.73062 | 0.029768 | 35.12 |
| 600761 | 2015 | -0.34 | 0.09 | 0.8232   | 0.67765891 | 22.46934 | 0.101982 | 37.97 |
| 300388 | 2015 | -0    | 0.09 | 0.8232   | 0.67765891 | 22.10346 | 0.088904 | 41.91 |
| 300247 | 2015 | -0.35 | 0.09 | 0.8232   | 0.67765891 | 21.38158 | 0.027946 | 17.12 |
| 600418 | 2015 | 0.036 | 0.09 | 0.8232   | 0.67765891 | 24.08725 | 0.084658 | 30.47 |
| 2230   | 2015 | 2.505 | 0.09 | 0.8232   | 0.67765891 | 22.85035 | 0.066928 | 13.93 |
| 600418 | 2015 | 0.102 | 0.09 | 0.8232   | 0.67765891 | 24.08725 | 0.084658 | 30.47 |
| 300009 | 2015 | 0.178 | 0.09 | 0.8232   | 0.67765891 | 20.90595 | 0.104732 | 27.88 |
| 600809 | 2015 | -0.84 | 0    | 1.161143 | 1.348252   | 22.62636 | 0.120529 | 69.97 |
| 600809 | 2015 | -0.84 | 0    | 1.161143 | 1.348252   | 22.62636 | 0.120529 | 69.97 |
| 600809 | 2015 | -0.84 | 0    | 1.161143 | 1.348252   | 22.4325  | 0.120529 | 69.97 |
| 600186 | 2015 | -0.65 | 0.07 | 1.564941 | 2.4490398  | 21.53221 | -0.4336  | 10.36 |
| 600186 | 2015 | -0.65 | 0.07 | 1.564941 | 2.4490398  | 21.53221 | -0.4336  | 10.36 |

|        |      |       |      |          |            |          |          |       |
|--------|------|-------|------|----------|------------|----------|----------|-------|
| 600186 | 2015 | -0.65 | 0.07 | 1.564941 | 2.4490398  | 21.53221 | -0.4336  | 10.36 |
| 600186 | 2015 | -0.65 | 0.07 | 1.564941 | 2.45E+00   | 21.41346 | -0.4336  | 10.36 |
| 600186 | 2015 | -0.65 | 0.07 | 1.564941 | 2.45E+00   | 21.53221 | -0.4336  | 10.36 |
| 600186 | 2015 | -0.65 | 0.07 | 1.564941 | 2.45E+00   | 21.53221 | -0.4336  | 10.36 |
| 600186 | 2015 | -0.65 | 0.07 | 1.564941 | 2.45E+00   | 21.53221 | -0.4336  | 10.36 |
| 600201 | 2015 | 0.529 | 0.01 | 0.693147 | 4.80E-01   | 21.26411 | 0.230958 | 11.73 |
| 2688   | 2015 | 0.278 | 0.01 | 0.693147 | 4.80E-01   | 21.3573  | 0.109772 | 39.77 |
| 300355 | 2015 | -0.84 | 0.01 | 0.693147 | 0.48045301 | 22.23856 | 0.078167 | 25.53 |
| 300355 | 2015 | -0.69 | 0.01 | 0.693147 | 0.48045301 | 22.23856 | 0.078167 | 25.53 |
| 300355 | 2015 | -0.84 | 0.01 | 0.693147 | 0.48045301 | 22.23856 | 0.078167 | 25.53 |
| 300355 | 2015 | -0.84 | 0.01 | 0.693147 | 0.48045301 | 22.23856 | 0.078167 | 25.53 |
| 2688   | 2015 | 0.278 | 0.01 | 0.693147 | 0.48045301 | 21.3573  | 0.109772 | 39.77 |
| 600201 | 2015 | 0.529 | 0.01 | 0.693147 | 0.48045301 | 21.65945 | 0.230958 | 11.73 |
| 300355 | 2015 | 0.488 | 0.01 | 0.693147 | 0.48045301 | 22.23856 | 0.078167 | 25.53 |
| 600887 | 2015 | 0.338 | 0.01 | 0.693147 | 0.48045301 | 24.40288 | 0.231036 | 8.79  |
| 600887 | 2015 | -0.44 | 0.01 | 0.693147 | 0.48045301 | 24.40288 | 0.231036 | 8.79  |
| 300355 | 2015 | 0.488 | 0.01 | 0.693147 | 0.48045301 | 22.23856 | 0.078167 | 25.53 |
| 600887 | 2015 | 0.338 | 0.01 | 0.693147 | 0.48045301 | 24.40288 | 0.231036 | 8.79  |
| 2688   | 2015 | 0.316 | 0.01 | 0.693147 | 0.48045301 | 21.3573  | 0.109772 | 39.77 |
| 600887 | 2015 | -0.44 | 0.01 | 0.693147 | 0.48045301 | 24.40288 | 0.231036 | 8.79  |
| 2688   | 2015 | 0.346 | 0.01 | 0.693147 | 0.48045301 | 21.16766 | 0.109772 | 39.77 |
| 300355 | 2015 | -0.84 | 0.01 | 0.693147 | 0.48045301 | 22.03044 | 0.078167 | 25.53 |
| 600887 | 2015 | -0.44 | 0.01 | 0.693147 | 0.48045301 | 24.40288 | 0.231036 | 8.79  |
| 600887 | 2015 | -0.44 | 0.01 | 0.693147 | 0.48045301 | 24.09613 | 0.231036 | 8.79  |
| 2688   | 2015 | 0.346 | 0.01 | 0.693147 | 0.48045301 | 21.3573  | 0.109772 | 39.77 |
| 600201 | 2015 | 0.529 | 0.01 | 0.693147 | 0.48045301 | 21.65945 | 0.230958 | 11.73 |
| 901    | 2015 | 0.378 | 0.08 | 0.813516 | 0.66180861 | 21.47921 | 0.043897 | 21.35 |
| 2698   | 2015 | -0    | 0.08 | 0.813516 | 0.66180861 | 21.4432  | 0.098908 | 24.11 |
| 600666 | 2015 | -0.24 | 0.08 | 0.813516 | 0.66180861 | 22.30996 | 0.141214 | 19    |
| 600853 | 2015 | -0.9  | 0.08 | 0.813516 | 0.66180861 | 22.76299 | 0.024699 | 33.34 |
| 600289 | 2015 | 1.672 | 0.08 | 0.813516 | 0.66180861 | 21.82346 | 0.052173 | 23.22 |
| 2437   | 2015 | 0.668 | 0.08 | 0.813516 | 0.66180861 | 22.84173 | 0.201864 | 42.62 |
| 2737   | 2015 | 0.376 | 0.08 | 0.813516 | 0.66180861 | 21.50506 | 0.125462 | 41.62 |
| 2437   | 2015 | -0.66 | 0.08 | 0.813516 | 0.66180861 | 22.84173 | 0.201864 | 42.62 |
| 600202 | 2015 | -0.38 | 0.08 | 0.813516 | 0.66180861 | 21.64071 | 0.016164 | 34.03 |
| 600666 | 2015 | -0.1  | 0.08 | 0.813516 | 0.66180861 | 22.30996 | 0.141214 | 19    |
| 2437   | 2015 | -0.33 | 0.08 | 0.813516 | 0.66180861 | 22.84173 | 0.201864 | 42.62 |
| 901    | 2015 | -0.28 | 0.08 | 0.813516 | 0.66180861 | 21.47921 | 0.043897 | 21.35 |
| 300040 | 2015 | -0.19 | 0.08 | 0.813516 | 0.66180861 | 21.48647 | 0.012257 | 19.76 |
| 2698   | 2015 | -0    | 0.08 | 0.813516 | 0.66180861 | 21.4432  | 0.098908 | 24.11 |
| 600038 | 2015 | 0.161 | 0.08 | 0.813516 | 0.66180861 | 23.84534 | 0.066637 | 28.21 |
| 300040 | 2015 | -0.4  | 0.08 | 0.813516 | 0.66180861 | 21.57315 | 0.012257 | 19.76 |
| 600038 | 2015 | 0.161 | 0.08 | 0.813516 | 0.66180861 | 23.84534 | 0.066637 | 28.21 |
| 600853 | 2015 | -0.9  | 0.08 | 0.813516 | 0.66180861 | 22.76299 | 0.024699 | 33.34 |
| 300040 | 2015 | -0.55 | 0.08 | 0.813516 | 0.66180861 | 21.57315 | 0.012257 | 19.76 |
| 600666 | 2015 | -0.28 | 0.08 | 0.813516 | 0.66180861 | 22.30996 | 0.141214 | 19    |
| 600095 | 2015 | 0.129 | 0.08 | 0.813516 | 0.66180861 | 20.85411 | 0.023344 | 16.08 |
| 300040 | 2015 | -0.55 | 0.08 | 0.813516 | 0.66180861 | 21.57315 | 0.012257 | 19.76 |
| 2737   | 2015 | 0.547 | 0.08 | 0.813516 | 0.66180861 | 22.04892 | 0.125462 | 41.62 |
| 2437   | 2015 | 0.668 | 0.08 | 0.813516 | 0.66180861 | 22.84173 | 0.201864 | 42.62 |
| 600666 | 2015 | -0.56 | 0.08 | 0.813516 | 0.66180861 | 22.30996 | 0.141214 | 19    |
| 600178 | 2015 | -0.59 | 0.08 | 0.813516 | 0.66180861 | 21.95335 | 0.013401 | 54.51 |
| 600811 | 2015 | 0.119 | 0.08 | 0.813516 | 0.66180861 | 23.77919 | 0.045652 | 27.98 |
| 600289 | 2015 | 1.672 | 0.08 | 0.813516 | 0.66180861 | 21.98655 | 0.052173 | 23.22 |

|        |      |       |      |          |            |          |          |       |
|--------|------|-------|------|----------|------------|----------|----------|-------|
| 600038 | 2015 | 0.161 | 0.08 | 0.813516 | 0.66180861 | 23.84534 | 0.066637 | 28.21 |
| 600178 | 2015 | -0.39 | 0.08 | 0.813516 | 0.66180861 | 21.95335 | 0.013401 | 54.51 |
| 2737   | 2015 | -0.78 | 0.08 | 0.813516 | 0.66180861 | 22.04892 | 0.125462 | 41.62 |
| 600811 | 2015 | 0.119 | 0.08 | 0.813516 | 0.66180861 | 23.69219 | 0.045652 | 27.98 |
| 600666 | 2015 | -0.23 | 0.08 | 0.813516 | 0.66180861 | 22.30996 | 0.141214 | 19    |
| 2437   | 2015 | 0.668 | 0.08 | 0.813516 | 0.66180861 | 22.84173 | 0.201864 | 42.62 |
| 2737   | 2015 | 0.376 | 0.08 | 0.813516 | 0.66180861 | 22.04892 | 0.125462 | 41.62 |
| 600095 | 2015 | 0.129 | 0.08 | 0.813516 | 0.66180861 | 20.77563 | 0.023344 | 16.08 |
| 901    | 2015 | 0.457 | 0.08 | 0.813516 | 0.66180861 | 21.47921 | 0.043897 | 21.35 |
| 2437   | 2015 | 0.668 | 0.08 | 0.813516 | 0.66180861 | 22.84173 | 0.201864 | 42.62 |
| 600289 | 2015 | 1.672 | 0.08 | 0.813516 | 0.66180861 | 21.82346 | 0.052173 | 23.22 |
| 300040 | 2015 | -0.35 | 0.08 | 0.813516 | 0.66180861 | 21.57315 | 0.012257 | 19.76 |
| 600289 | 2015 | 1.672 | 0.08 | 0.813516 | 0.66180861 | 21.82346 | 0.052173 | 23.22 |
| 2737   | 2015 | 0.547 | 0.08 | 0.813516 | 0.66180861 | 22.04892 | 0.125462 | 41.62 |
| 2437   | 2015 | 0.103 | 0.08 | 0.813516 | 0.66180861 | 22.84173 | 0.201864 | 42.62 |
| 600666 | 2015 | -0.29 | 0.08 | 0.813516 | 0.66180861 | 22.48569 | 0.141214 | 19    |
| 2437   | 2015 | 0.668 | 0.08 | 0.813516 | 0.66180861 | 22.84173 | 0.201864 | 42.62 |
| 600853 | 2015 | -0.78 | 0.08 | 0.813516 | 0.66180861 | 22.76299 | 0.024699 | 33.34 |
| 600666 | 2015 | -0.28 | 0.08 | 0.813516 | 0.66180861 | 22.30996 | 0.141214 | 19    |
| 2437   | 2015 | 0.21  | 0.08 | 0.813516 | 0.66180861 | 22.73399 | 0.201864 | 42.62 |
| 2698   | 2015 | -0    | 0.08 | 0.813516 | 0.66180861 | 21.4432  | 0.098908 | 24.11 |
| 600289 | 2015 | 1.672 | 0.08 | 0.813516 | 0.66180861 | 21.82346 | 0.052173 | 23.22 |
| 600853 | 2015 | -0.9  | 0.08 | 0.813516 | 0.66180861 | 22.76299 | 0.024699 | 33.34 |
| 600853 | 2015 | -0.78 | 0.08 | 0.813516 | 0.66180861 | 22.76299 | 0.024699 | 33.34 |
| 2698   | 2015 | -0.35 | 0.08 | 0.813516 | 0.66180861 | 21.4432  | 0.098908 | 24.11 |
| 2698   | 2015 | 0.289 | 0.08 | 0.813516 | 0.66180861 | 21.42109 | 0.098908 | 24.11 |
| 600202 | 2015 | -0.38 | 0.08 | 0.813516 | 0.66180861 | 21.64071 | 0.016164 | 34.03 |
| 2698   | 2015 | 0.114 | 0.08 | 0.813516 | 0.66180861 | 21.4432  | 0.098908 | 24.11 |
| 600178 | 2015 | -0.39 | 0.08 | 0.813516 | 0.66180861 | 21.95335 | 0.013401 | 54.51 |
| 2737   | 2015 | -0.01 | 0.08 | 0.813516 | 0.66180861 | 22.04892 | 0.125462 | 41.62 |
| 2437   | 2015 | 0.439 | 0.08 | 0.813516 | 0.66180861 | 22.84173 | 0.201864 | 42.62 |
| 2437   | 2015 | 0.668 | 0.08 | 0.813516 | 0.66180861 | 22.84173 | 0.201864 | 42.62 |
| 600038 | 2015 | 0.161 | 0.08 | 0.813516 | 0.66180861 | 22.51272 | 0.066637 | 28.21 |
| 600664 | 2015 | -0.4  | 0.08 | 0.813516 | 0.66180861 | 23.07147 | 0.082117 | 47.06 |
| 600853 | 2015 | -0.9  | 0.08 | 0.813516 | 0.66180861 | 22.76299 | 0.024699 | 33.34 |
| 600178 | 2015 | -0.59 | 0.08 | 0.813516 | 0.66180861 | 21.95335 | 0.013401 | 54.51 |
| 901    | 2015 | 0.378 | 0.08 | 0.813516 | 0.66180861 | 21.05479 | 0.043897 | 21.35 |
| 2698   | 2015 | 0.234 | 0.08 | 0.813516 | 0.66180861 | 21.4432  | 0.098908 | 24.11 |
| 600666 | 2015 | 0.418 | 0.08 | 0.813516 | 0.66180861 | 22.30996 | 0.141214 | 19    |
| 600095 | 2015 | 0.129 | 0.08 | 0.813516 | 0.66180861 | 20.77563 | 0.023344 | 16.08 |
| 2737   | 2015 | 0.547 | 0.08 | 0.813516 | 0.66180861 | 22.04892 | 0.125462 | 41.62 |
| 600666 | 2015 | -0.28 | 0.08 | 0.813516 | 0.66180861 | 22.30996 | 0.141214 | 19    |
| 600202 | 2015 | -0.38 | 0.08 | 0.813516 | 0.66180861 | 21.64071 | 0.016164 | 34.03 |
| 600289 | 2015 | 1.672 | 0.08 | 0.813516 | 0.66180861 | 21.82346 | 0.052173 | 23.22 |
| 600853 | 2015 | -0.9  | 0.08 | 0.813516 | 0.66180861 | 22.76299 | 0.024699 | 33.34 |
| 600853 | 2015 | -0.9  | 0.08 | 0.813516 | 0.66180861 | 22.76299 | 0.024699 | 33.34 |
| 901    | 2015 | 0.378 | 0.08 | 0.813516 | 0.66180861 | 21.47921 | 0.043897 | 21.35 |
| 300040 | 2015 | -0.55 | 0.08 | 0.813516 | 0.66180861 | 21.57315 | 0.012257 | 19.76 |
| 600202 | 2015 | -0.38 | 0.08 | 0.813516 | 0.66180861 | 21.64585 | 0.016164 | 34.03 |
| 600095 | 2015 | 0.129 | 0.08 | 0.813516 | 0.66180861 | 20.77563 | 0.023344 | 16.08 |
| 600095 | 2015 | 0.129 | 0.08 | 0.813516 | 0.66180861 | 20.77563 | 0.023344 | 16.08 |
| 600289 | 2015 | 1.672 | 0.08 | 0.813516 | 0.66180861 | 21.82346 | 0.052173 | 23.22 |
| 600664 | 2015 | -0.57 | 0.08 | 0.813516 | 0.66180861 | 23.07147 | 0.082117 | 47.06 |
| 600811 | 2015 | 0.119 | 0.08 | 0.813516 | 0.66180861 | 23.77919 | 0.045652 | 27.98 |

|        |      |       |      |          |            |          |          |       |
|--------|------|-------|------|----------|------------|----------|----------|-------|
| 2698   | 2015 | 0.234 | 0.08 | 0.813516 | 0.66180861 | 21.4432  | 0.098908 | 24.11 |
| 901    | 2015 | 0.393 | 0.08 | 0.813516 | 0.66180861 | 21.47921 | 0.043897 | 21.35 |
| 600666 | 2015 | 0.418 | 0.08 | 0.813516 | 0.66180861 | 22.30996 | 0.141214 | 19    |
| 901    | 2015 | 0.587 | 0.08 | 0.813516 | 0.66180861 | 21.47921 | 0.043897 | 21.35 |
| 2737   | 2015 | -0.78 | 0.08 | 0.813516 | 0.66180861 | 22.04892 | 0.125462 | 41.62 |
| 2437   | 2015 | 0.668 | 0.08 | 0.813516 | 0.66180861 | 22.84173 | 0.201864 | 42.62 |
| 2437   | 2015 | 0.103 | 0.08 | 0.813516 | 0.66180861 | 22.84173 | 0.201864 | 42.62 |
| 600178 | 2015 | -0.39 | 0.08 | 0.813516 | 0.66180861 | 21.95335 | 0.013401 | 54.51 |
| 901    | 2015 | 0.457 | 0.08 | 0.813516 | 0.66180861 | 21.47921 | 0.043897 | 21.35 |
| 600811 | 2015 | 0.119 | 0.08 | 0.813516 | 0.66180861 | 23.77919 | 0.045652 | 27.98 |
| 600853 | 2015 | -0.9  | 0.08 | 0.813516 | 0.66180861 | 22.76299 | 0.024699 | 33.34 |
| 600664 | 2015 | -0.57 | 0.08 | 0.813516 | 0.66180861 | 23.07147 | 0.082117 | 47.06 |
| 600202 | 2015 | -0.38 | 0.08 | 0.813516 | 0.66180861 | 21.64071 | 0.016164 | 34.03 |
| 600811 | 2015 | 0.119 | 0.08 | 0.813516 | 0.66180861 | 23.77919 | 0.045652 | 27.98 |
| 2698   | 2015 | -0.14 | 0.08 | 0.813516 | 0.66180861 | 21.4432  | 0.098908 | 24.11 |
| 600853 | 2015 | -0.9  | 0.08 | 0.813516 | 0.66180861 | 22.0687  | 0.024699 | 33.34 |
| 600664 | 2015 | -0.57 | 0.08 | 0.813516 | 0.66180861 | 23.34547 | 0.082117 | 47.06 |
| 901    | 2015 | -0.28 | 0.08 | 0.813516 | 0.66180861 | 21.47921 | 0.043897 | 21.35 |
| 600664 | 2015 | -0.4  | 0.08 | 0.813516 | 0.66180861 | 23.07147 | 0.082117 | 47.06 |
| 901    | 2015 | -0.28 | 0.08 | 0.813516 | 0.66180861 | 21.47921 | 0.043897 | 21.35 |
| 600853 | 2015 | -0.68 | 0.08 | 0.813516 | 0.66180861 | 22.76299 | 0.024699 | 33.34 |
| 901    | 2015 | 0.422 | 0.08 | 0.813516 | 0.66180861 | 21.47921 | 0.043897 | 21.35 |
| 600664 | 2015 | -0.57 | 0.08 | 0.813516 | 0.66180861 | 23.07147 | 0.082117 | 47.06 |
| 2737   | 2015 | 0.376 | 0.08 | 0.813516 | 0.66180861 | 22.04892 | 0.125462 | 41.62 |
| 600178 | 2015 | -0.46 | 0.08 | 0.813516 | 0.66180861 | 21.95335 | 0.013401 | 54.51 |
| 600664 | 2015 | 0.238 | 0.08 | 0.813516 | 0.66180861 | 23.07147 | 0.082117 | 47.06 |
| 2737   | 2015 | -0.14 | 0.08 | 0.813516 | 0.66180861 | 22.04892 | 0.125462 | 41.62 |
| 856    | 2015 | -0.75 | 0.02 | 1.406509 | 1.9782666  | 21.52889 | -0.4336  | 41.52 |
| 856    | 2015 | -0.8  | 0.02 | 1.406509 | 1.9782666  | 21.52889 | -0.4336  | 41.52 |
| 600409 | 2015 | -0.61 | 0.02 | 1.406509 | 1.9782666  | 23.73621 | 0.056393 | 39.98 |
| 856    | 2015 | -0.92 | 0.02 | 1.406509 | 1.9782666  | 21.52889 | -0.4336  | 41.52 |
| 856    | 2015 | -0.92 | 0.02 | 1.406509 | 1.9782666  | 21.0014  | -0.4336  | 41.52 |
| 600997 | 2015 | -0.29 | 0.02 | 1.406509 | 1.9782666  | 23.25811 | -0.0655  | 56.72 |
| 600409 | 2015 | 0.152 | 0.02 | 1.406509 | 1.9782666  | 23.73621 | 0.056393 | 39.98 |
| 300371 | 2015 | -0.55 | 0.02 | 1.406509 | 1.9782666  | 20.1462  | 0.130411 | 37.88 |
| 300371 | 2015 | -0.42 | 0.02 | 1.406509 | 1.9782666  | 20.1462  | 0.130411 | 37.88 |
| 600409 | 2015 | -0.55 | 0.02 | 1.406509 | 1.9782666  | 23.73621 | 0.056393 | 39.98 |
| 600997 | 2015 | -0.32 | 0.02 | 1.406509 | 1.9782666  | 23.73584 | -0.0655  | 56.72 |
| 600997 | 2015 | -0.96 | 0.02 | 1.406509 | 1.9782666  | 23.73584 | -0.0655  | 56.72 |
| 2049   | 2015 | 1.762 | 0.02 | 1.406509 | 1.9782666  | 22.14141 | 0.113268 | 41.38 |
| 2049   | 2015 | 1.045 | 0.02 | 1.406509 | 1.9782666  | 22.14141 | 0.113268 | 41.38 |
| 600997 | 2015 | -0.43 | 0.02 | 1.406509 | 1.9782666  | 23.73584 | -0.0655  | 56.72 |
| 600409 | 2015 | -0.49 | 0.02 | 1.406509 | 1.9782666  | 23.73621 | 0.056393 | 39.98 |
| 2049   | 2015 | 2.037 | 0.02 | 1.406509 | 1.9782666  | 22.14141 | 0.113268 | 41.38 |
| 856    | 2015 | -0.92 | 0.02 | 1.406509 | 1.9782666  | 21.52889 | -0.4336  | 41.52 |
| 401    | 2015 | -0.99 | 0.02 | 1.406509 | 1.9782666  | 24.32359 | -0.18974 | 37.48 |
| 856    | 2015 | -0.92 | 0.02 | 1.406509 | 1.9782666  | 21.52889 | -0.4336  | 41.52 |
| 600409 | 2015 | -0.79 | 0.02 | 1.406509 | 1.9782666  | 23.73621 | 0.056393 | 39.98 |
| 2049   | 2015 | 1.754 | 0.02 | 1.406509 | 1.9782666  | 22.14141 | 0.113268 | 41.38 |
| 2049   | 2015 | 1.624 | 0.02 | 1.406509 | 1.9782666  | 22.14141 | 0.113268 | 41.38 |
| 401    | 2015 | -0.99 | 0.02 | 1.406509 | 1.9782666  | 24.44367 | -0.18974 | 37.48 |
| 300371 | 2015 | -0.42 | 0.02 | 1.406509 | 1.9782666  | 20.1462  | 0.130411 | 37.88 |
| 600997 | 2015 | -0.3  | 0.02 | 1.406509 | 1.9782666  | 23.73584 | -0.0655  | 56.72 |
| 2049   | 2015 | 2.141 | 0.02 | 1.406509 | 1.9782666  | 22.14141 | 0.113268 | 41.38 |

|        |      |       |      |          |            |          |          |       |
|--------|------|-------|------|----------|------------|----------|----------|-------|
| 300371 | 2015 | -0.22 | 0.02 | 1.406509 | 1.9782666  | 20.1462  | 0.130411 | 37.88 |
| 2049   | 2015 | 1.045 | 0.02 | 1.406509 | 1.9782666  | 22.14141 | 0.113268 | 41.38 |
| 2049   | 2015 | 1.045 | 0.02 | 1.406509 | 1.9782666  | 22.14141 | 0.113268 | 41.38 |
| 856    | 2015 | -0.75 | 0.02 | 1.406509 | 1.9782666  | 21.52889 | -0.4336  | 41.52 |
| 2049   | 2015 | 1.045 | 0.02 | 1.406509 | 1.9782666  | 22.14141 | 0.113268 | 41.38 |
| 600409 | 2015 | -0.51 | 0.02 | 1.406509 | 1.9782666  | 23.73621 | 0.056393 | 39.98 |
| 2049   | 2015 | 1.541 | 0.02 | 1.406509 | 1.9782666  | 22.14141 | 0.113268 | 41.38 |
| 600409 | 2015 | -0.44 | 0.02 | 1.406509 | 1.9782666  | 23.73621 | 0.056393 | 39.98 |
| 2049   | 2015 | 2.37  | 0.02 | 1.406509 | 1.9782666  | 21.61569 | 0.113268 | 41.38 |
| 600409 | 2015 | -0.79 | 0.02 | 1.406509 | 1.9782666  | 23.73621 | 0.056393 | 39.98 |
| 600997 | 2015 | -0.43 | 0.02 | 1.406509 | 1.9782666  | 23.73584 | -0.0655  | 56.72 |
| 401    | 2015 | -0.99 | 0.02 | 1.406509 | 1.9782666  | 24.44367 | -0.18974 | 37.48 |
| 600409 | 2015 | -0.61 | 0.02 | 1.406509 | 1.9782666  | 22.99124 | 0.056393 | 39.98 |
| 600409 | 2015 | -0.79 | 0.02 | 1.406509 | 1.9782666  | 23.73621 | 0.056393 | 39.98 |
| 401    | 2015 | -0.99 | 0.02 | 1.406509 | 1.9782666  | 24.44367 | -0.18974 | 37.48 |
| 600409 | 2015 | -0.55 | 0.02 | 1.406509 | 1.9782666  | 23.73621 | 0.056393 | 39.98 |
| 933    | 2015 | -0.94 | 0.07 | 1.332131 | 1.7745734  | 24.644   | -0.21369 | 24.21 |
| 933    | 2015 | -0.94 | 0.07 | 1.332131 | 1.7745734  | 24.20406 | -0.21369 | 24.21 |
| 933    | 2015 | -0.94 | 0.07 | 1.332131 | 1.7745734  | 24.644   | -0.21369 | 24.21 |
| 933    | 2015 | -0.94 | 0.07 | 1.332131 | 1.7745734  | 24.644   | -0.21369 | 24.21 |
| 933    | 2015 | -0.94 | 0.07 | 1.332131 | 1.7745734  | 24.644   | -0.21369 | 24.21 |
| 601002 | 2015 | -0.85 | 0.12 | 0.693147 | 0.48045301 | 22.10163 | -0.00816 | 41.35 |
| 2522   | 2015 | -0.49 | 0.12 | 0.693147 | 0.48045301 | 21.32766 | 0.046478 | 46.2  |
| 2144   | 2015 | -0.41 | 0.12 | 0.693147 | 0.48045301 | 21.40263 | 0.073163 | 21.36 |
| 2381   | 2015 | -0.16 | 0.12 | 0.693147 | 0.48045301 | 21.07595 | 0.086805 | 24.53 |
| 2648   | 2015 | -0.62 | 0.12 | 0.693147 | 0.48045301 | 22.68312 | -0.13928 | 49.88 |
| 603889 | 2015 | -0.53 | 0.12 | 0.693147 | 0.48045301 | 21.08097 | 0.124964 | 37.71 |
| 600330 | 2015 | 0.413 | 0.12 | 0.693147 | 0.48045301 | 22.19574 | 0.021036 | 13    |
| 2522   | 2015 | -0.49 | 0.12 | 0.693147 | 0.48045301 | 21.32766 | 0.046478 | 46.2  |
| 2718   | 2015 | -0.57 | 0.12 | 0.693147 | 0.48045301 | 20.35541 | 0.194263 | 37.49 |
| 601002 | 2015 | -0.71 | 0.12 | 0.693147 | 0.48045301 | 22.01119 | -0.00816 | 41.35 |
| 2067   | 2015 | 0.602 | 0.12 | 0.693147 | 0.48045301 | 22.46694 | 0.000691 | 16.29 |
| 600176 | 2015 | 0.644 | 0.12 | 0.693147 | 0.48045301 | 23.32262 | 0.100734 | 34.17 |
| 601233 | 2015 | -0.9  | 0.12 | 0.693147 | 0.48045301 | 23.43831 | 0.017182 | 37.62 |
| 600330 | 2015 | -0.07 | 0.12 | 0.693147 | 0.48045301 | 22.08191 | 0.021036 | 13    |
| 2188   | 2015 | -0.06 | 0.12 | 0.693147 | 0.48045301 | 21.44474 | 0.00531  | 20.03 |
| 600273 | 2015 | 0.154 | 0.12 | 0.693147 | 0.48045301 | 22.49434 | 0.196115 | 43.65 |
| 2144   | 2015 | -0.41 | 0.12 | 0.693147 | 0.48045301 | 21.45142 | 0.073163 | 21.36 |
| 2718   | 2015 | -0.57 | 0.12 | 0.693147 | 0.48045301 | 20.35541 | 0.194263 | 37.49 |
| 600176 | 2015 | -0.27 | 0.12 | 0.693147 | 0.48045301 | 23.9048  | 0.100734 | 34.17 |
| 600796 | 2015 | 0.102 | 0.12 | 0.693147 | 0.48045301 | 20.7939  | 0.053843 | 33.3  |
| 600796 | 2015 | 0.102 | 0.12 | 0.693147 | 0.48045301 | 20.67881 | 0.053843 | 33.3  |
| 2206   | 2015 | 0.549 | 0.12 | 0.693147 | 0.48045301 | 22.00522 | 0.093133 | 25.28 |
| 600176 | 2015 | -0.68 | 0.12 | 0.693147 | 0.48045301 | 23.9048  | 0.100734 | 34.17 |
| 2404   | 2015 | -0.5  | 0.12 | 0.693147 | 0.48045301 | 21.45999 | 0.048735 | 21.83 |
| 2404   | 2015 | -0.62 | 0.12 | 0.693147 | 0.48045301 | 21.45999 | 0.048735 | 21.83 |
| 2067   | 2015 | 0.602 | 0.12 | 0.693147 | 0.48045301 | 22.46694 | 0.000691 | 16.29 |
| 2067   | 2015 | 0.602 | 0.12 | 0.693147 | 0.48045301 | 22.46694 | 0.000691 | 16.29 |
| 2144   | 2015 | -0.41 | 0.12 | 0.693147 | 0.48045301 | 21.45142 | 0.073163 | 21.36 |
| 600330 | 2015 | 0.167 | 0.12 | 0.693147 | 0.48045301 | 22.19574 | 0.021036 | 13    |
| 2404   | 2015 | -0.84 | 0.12 | 0.693147 | 0.48045301 | 21.45999 | 0.048735 | 21.83 |
| 601233 | 2015 | -0.73 | 0.12 | 0.693147 | 0.48045301 | 23.43831 | 0.017182 | 37.62 |
| 600273 | 2015 | 0.154 | 0.12 | 0.693147 | 0.48045301 | 22.49434 | 0.196115 | 43.65 |
| 2718   | 2015 | -0.57 | 0.12 | 0.693147 | 0.48045301 | 20.35541 | 0.194263 | 37.49 |



|        |      |       |      |          |            |          |          |       |
|--------|------|-------|------|----------|------------|----------|----------|-------|
| 603889 | 2015 | -0.73 | 0.12 | 0.693147 | 0.48045301 | 21.08097 | 0.124964 | 37.71 |
| 601002 | 2015 | -0.85 | 0.12 | 0.693147 | 0.48045301 | 22.10163 | -0.00816 | 41.35 |
| 2404   | 2015 | -0.5  | 0.12 | 0.693147 | 0.48045301 | 21.45999 | 0.048735 | 21.83 |
| 601233 | 2015 | -0.4  | 0.12 | 0.693147 | 0.48045301 | 23.43831 | 0.017182 | 37.62 |
| 2404   | 2015 | -0.84 | 0.12 | 0.693147 | 0.48045301 | 21.45999 | 0.048735 | 21.83 |
| 600330 | 2015 | 0.178 | 0.12 | 0.693147 | 0.48045301 | 22.19574 | 0.021036 | 13    |
| 2206   | 2015 | 0.549 | 0.12 | 0.693147 | 0.48045301 | 22.01469 | 0.093133 | 25.28 |
| 2404   | 2015 | -0.84 | 0.12 | 0.693147 | 0.48045301 | 21.45999 | 0.048735 | 21.83 |
| 2404   | 2015 | -0.57 | 0.12 | 0.693147 | 0.48045301 | 21.45999 | 0.048735 | 21.83 |
| 601233 | 2015 | -0.9  | 0.12 | 0.693147 | 0.48045301 | 23.43831 | 0.017182 | 37.62 |
| 2067   | 2015 | 0.602 | 0.12 | 0.693147 | 0.48045301 | 22.33989 | 0.000691 | 16.29 |
| 2562   | 2015 | 0.234 | 0.12 | 0.693147 | 0.48045301 | 21.44552 | 0.060019 | 25.78 |
| 2206   | 2015 | 0.549 | 0.12 | 0.693147 | 0.48045301 | 22.01469 | 0.093133 | 25.28 |
| 2562   | 2015 | 0.183 | 0.12 | 0.693147 | 0.48045301 | 21.44552 | 0.060019 | 25.78 |
| 601002 | 2015 | -0.68 | 0.12 | 0.693147 | 0.48045301 | 22.10163 | -0.00816 | 41.35 |
| 2677   | 2015 | -0.58 | 0.12 | 0.693147 | 0.48045301 | 20.91545 | 0.149157 | 67.5  |
| 2648   | 2015 | -0.21 | 0.12 | 0.693147 | 0.48045301 | 22.2295  | -0.13928 | 49.88 |
| 601233 | 2015 | -0.9  | 0.12 | 0.693147 | 0.48045301 | 23.43831 | 0.017182 | 37.62 |
| 2677   | 2015 | -0.5  | 0.12 | 0.693147 | 0.48045301 | 20.91545 | 0.149157 | 67.5  |
| 2522   | 2015 | -0.49 | 0.12 | 0.693147 | 0.48045301 | 21.32766 | 0.046478 | 46.2  |
| 2562   | 2015 | 0.414 | 0.12 | 0.693147 | 0.48045301 | 21.44552 | 0.060019 | 25.78 |
| 2677   | 2015 | -0.58 | 0.12 | 0.693147 | 0.48045301 | 20.91545 | 0.149157 | 67.5  |
| 2404   | 2015 | -0.5  | 0.12 | 0.693147 | 0.48045301 | 21.45999 | 0.048735 | 21.83 |
| 601233 | 2015 | -0.68 | 0.12 | 0.693147 | 0.48045301 | 23.43831 | 0.017182 | 37.62 |
| 600796 | 2015 | 0.102 | 0.12 | 0.693147 | 0.48045301 | 20.7939  | 0.053843 | 33.3  |
| 600235 | 2015 | 0.007 | 0.12 | 0.693147 | 0.48045301 | 21.66996 | -0.12463 | 35.36 |
| 600176 | 2015 | -0.26 | 0.12 | 0.693147 | 0.48045301 | 23.9048  | 0.100734 | 34.17 |
| 601233 | 2015 | -0.4  | 0.12 | 0.693147 | 0.48045301 | 23.43831 | 0.017182 | 37.62 |
| 600330 | 2015 | -0.07 | 0.12 | 0.693147 | 0.48045301 | 22.19574 | 0.021036 | 13    |
| 2404   | 2015 | -0.5  | 0.12 | 0.693147 | 0.48045301 | 21.3404  | 0.048735 | 21.83 |
| 2206   | 2015 | 0.549 | 0.12 | 0.693147 | 0.48045301 | 22.01469 | 0.093133 | 25.28 |
| 2562   | 2015 | 0.183 | 0.12 | 0.693147 | 0.48045301 | 21.35152 | 0.060019 | 25.78 |
| 2677   | 2015 | -0.51 | 0.12 | 0.693147 | 0.48045301 | 20.91545 | 0.149157 | 67.5  |
| 600330 | 2015 | -0.25 | 0.12 | 0.693147 | 0.48045301 | 22.19574 | 0.021036 | 13    |
| 2067   | 2015 | 0.602 | 0.12 | 0.693147 | 0.48045301 | 22.46694 | 0.000691 | 16.29 |
| 601233 | 2015 | -0.73 | 0.12 | 0.693147 | 0.48045301 | 23.43831 | 0.017182 | 37.62 |
| 601233 | 2015 | -0.73 | 0.12 | 0.693147 | 0.48045301 | 23.43831 | 0.017182 | 37.62 |
| 2188   | 2015 | 0.266 | 0.12 | 0.693147 | 0.48045301 | 21.52622 | 0.00531  | 20.03 |
| 2404   | 2015 | -0.62 | 0.12 | 0.693147 | 0.48045301 | 21.45999 | 0.048735 | 21.83 |
| 600330 | 2015 | -0.07 | 0.12 | 0.693147 | 0.48045301 | 22.19574 | 0.021036 | 13    |
| 2522   | 2015 | -0.49 | 0.12 | 0.693147 | 0.48045301 | 21.33615 | 0.046478 | 46.2  |
| 2648   | 2015 | -0.23 | 0.12 | 0.693147 | 0.48045301 | 22.68312 | -0.13928 | 49.88 |
| 2144   | 2015 | -0.41 | 0.12 | 0.693147 | 0.48045301 | 21.45142 | 0.073163 | 21.36 |
| 601233 | 2015 | -0.9  | 0.12 | 0.693147 | 0.48045301 | 23.43831 | 0.017182 | 37.62 |
| 2677   | 2015 | -0.5  | 0.12 | 0.693147 | 0.48045301 | 20.81925 | 0.149157 | 67.5  |
| 600330 | 2015 | -0.47 | 0.12 | 0.693147 | 0.48045301 | 22.19574 | 0.021036 | 13    |
| 2188   | 2015 | 0.266 | 0.12 | 0.693147 | 0.48045301 | 21.52622 | 0.00531  | 20.03 |
| 601233 | 2015 | -0.84 | 0.12 | 0.693147 | 0.48045301 | 23.43831 | 0.017182 | 37.62 |
| 2381   | 2015 | -0.16 | 0.12 | 0.693147 | 0.48045301 | 21.1451  | 0.086805 | 24.53 |
| 600273 | 2015 | 0.154 | 0.12 | 0.693147 | 0.48045301 | 22.46223 | 0.196115 | 43.65 |
| 2648   | 2015 | -0.36 | 0.12 | 0.693147 | 0.48045301 | 22.68312 | -0.13928 | 49.88 |
| 2188   | 2015 | 0.266 | 0.12 | 0.693147 | 0.48045301 | 21.52622 | 0.00531  | 20.03 |
| 2404   | 2015 | -0.5  | 0.12 | 0.693147 | 0.48045301 | 21.45999 | 0.048735 | 21.83 |
| 2206   | 2015 | 0.549 | 0.12 | 0.693147 | 0.48045301 | 22.01469 | 0.093133 | 25.28 |

|        |      |       |      |          |            |          |          |       |
|--------|------|-------|------|----------|------------|----------|----------|-------|
| 600176 | 2015 | -0.27 | 0.12 | 0.693147 | 0.48045301 | 23.9048  | 0.100734 | 34.17 |
| 600235 | 2015 | 0.007 | 0.12 | 0.693147 | 0.48045301 | 21.58378 | -0.12463 | 35.36 |
| 600330 | 2015 | 0.02  | 0.12 | 0.693147 | 0.48045301 | 22.19574 | 0.021036 | 13    |
| 2648   | 2015 | 0.019 | 0.12 | 0.693147 | 0.48045301 | 22.68312 | -0.13928 | 49.88 |
| 2562   | 2015 | 0.414 | 0.12 | 0.693147 | 0.48045301 | 21.44552 | 0.060019 | 25.78 |
| 603889 | 2015 | -0.73 | 0.12 | 0.693147 | 0.48045301 | 21.08097 | 0.124964 | 37.71 |
| 601002 | 2015 | -0.85 | 0.12 | 0.693147 | 0.48045301 | 22.10163 | -0.00816 | 41.35 |
| 600176 | 2015 | -0.68 | 0.12 | 0.693147 | 0.48045301 | 23.32262 | 0.100734 | 34.17 |
| 601233 | 2015 | -0.73 | 0.12 | 0.693147 | 0.48045301 | 23.43831 | 0.017182 | 37.62 |
| 2404   | 2015 | -0.62 | 0.12 | 0.693147 | 0.48045301 | 21.45999 | 0.048735 | 21.83 |
| 600330 | 2015 | -0.31 | 0.12 | 0.693147 | 0.48045301 | 22.19574 | 0.021036 | 13    |
| 600235 | 2015 | 0.007 | 0.12 | 0.693147 | 0.48045301 | 21.66996 | -0.12463 | 35.36 |
| 601002 | 2015 | -0.85 | 0.12 | 0.693147 | 0.48045301 | 22.10163 | -0.00816 | 41.35 |
| 2144   | 2015 | -0.41 | 0.12 | 0.693147 | 0.48045301 | 21.45142 | 0.073163 | 21.36 |
| 2648   | 2015 | 0.019 | 0.12 | 0.693147 | 0.48045301 | 22.68312 | -0.13928 | 49.88 |
| 601233 | 2015 | -0.73 | 0.12 | 0.693147 | 0.48045301 | 23.19393 | 0.017182 | 37.62 |
| 601002 | 2015 | -0.68 | 0.12 | 0.693147 | 0.48045301 | 22.10163 | -0.00816 | 41.35 |
| 2188   | 2015 | -0.39 | 0.12 | 0.693147 | 0.48045301 | 21.52622 | 0.00531  | 20.03 |
| 2381   | 2015 | -0.16 | 0.12 | 0.693147 | 0.48045301 | 21.1451  | 0.086805 | 24.53 |
| 2522   | 2015 | -0.49 | 0.12 | 0.693147 | 0.48045301 | 21.32766 | 0.046478 | 46.2  |
| 603889 | 2015 | -0.53 | 0.12 | 0.693147 | 0.48045301 | 20.83967 | 0.124964 | 37.71 |
| 603889 | 2015 | -0.53 | 0.12 | 0.693147 | 0.48045301 | 21.08097 | 0.124964 | 37.71 |
| 603889 | 2015 | -0.56 | 0.12 | 0.693147 | 0.48045301 | 21.08097 | 0.124964 | 37.71 |
| 600330 | 2015 | -0.34 | 0.12 | 0.693147 | 0.48045301 | 22.19574 | 0.021036 | 13    |
| 600330 | 2015 | -0.47 | 0.12 | 0.693147 | 0.48045301 | 22.19574 | 0.021036 | 13    |
| 2188   | 2015 | -0.06 | 0.12 | 0.693147 | 0.48045301 | 21.52622 | 0.00531  | 20.03 |
| 2648   | 2015 | 0.248 | 0.12 | 0.693147 | 0.48045301 | 22.68312 | -0.13928 | 49.88 |
| 601002 | 2015 | -0.85 | 0.12 | 0.693147 | 0.48045301 | 22.10163 | -0.00816 | 41.35 |
| 2145   | 2015 | -0.35 | 0.04 | 1.100749 | 1.2116491  | 21.73941 | -0.0536  | 36.69 |
| 2145   | 2015 | -0.5  | 0.04 | 1.100749 | 1.2116491  | 21.73941 | -0.0536  | 36.69 |
| 600307 | 2015 | -0.51 | 0.04 | 1.100749 | 1.2116491  | 24.38121 | -0.4336  | 54.7  |
| 600307 | 2015 | -0.51 | 0.04 | 1.100749 | 1.2116491  | 24.38121 | -0.4336  | 54.7  |
| 600307 | 2015 | -0.51 | 0.04 | 1.100749 | 1.2116491  | 24.38121 | -0.4336  | 54.7  |
| 600307 | 2015 | -0.51 | 0.04 | 1.100749 | 1.2116491  | 24.38121 | -0.4336  | 54.7  |
| 600307 | 2015 | -0.51 | 0.04 | 1.100749 | 1.2116491  | 24.45042 | -0.4336  | 54.7  |
| 2145   | 2015 | -0.35 | 0.04 | 1.100749 | 1.2116491  | 22.28997 | -0.0536  | 36.69 |
| 2145   | 2015 | -0.5  | 0.04 | 1.100749 | 1.2116491  | 21.73941 | -0.0536  | 36.69 |
| 2145   | 2015 | -0.75 | 0.04 | 1.100749 | 1.2116491  | 21.73941 | -0.0536  | 36.69 |
| 300254 | 2015 | 0.465 | 0    | 0.983238 | 0.9667579  | 20.99209 | 0.033301 | 11.91 |
| 300254 | 2015 | 0.465 | 0    | 0.983238 | 0.9667579  | 20.99209 | 0.033301 | 11.91 |
| 300254 | 2015 | 0.465 | 0    | 0.983238 | 0.9667579  | 20.99209 | 0.033301 | 11.91 |
| 300254 | 2015 | 0.465 | 0    | 0.983238 | 0.9667579  | 20.99209 | 0.033301 | 11.91 |
| 300254 | 2015 | 0.796 | 0    | 0.983238 | 0.9667579  | 20.99209 | 0.033301 | 11.91 |
| 300254 | 2015 | 0.531 | 0    | 0.983238 | 0.9667579  | 20.80384 | 0.033301 | 11.91 |
| 300254 | 2015 | 0.465 | 0    | 0.983238 | 0.9667579  | 20.99209 | 0.033301 | 11.91 |
| 300254 | 2015 | 0.531 | 0    | 0.983238 | 0.9667579  | 20.99209 | 0.033301 | 11.91 |
| 2185   | 2015 | -0.19 | 0.04 | 0.693147 | 0.48045301 | 22.67894 | 0.062111 | 27.59 |
| 2185   | 2015 | 0.076 | 0.04 | 0.693147 | 0.48045301 | 22.67894 | 0.062111 | 27.59 |
| 2185   | 2015 | -0.12 | 0.04 | 0.693147 | 0.48045301 | 22.67894 | 0.062111 | 27.59 |
| 2185   | 2015 | -0.19 | 0.04 | 0.693147 | 0.48045301 | 22.67894 | 0.062111 | 27.59 |
| 2185   | 2015 | 0.368 | 0.04 | 0.693147 | 0.48045301 | 22.67894 | 0.062111 | 27.59 |
| 2185   | 2015 | -0.02 | 0.04 | 0.693147 | 0.48045301 | 22.67894 | 0.062111 | 27.59 |
| 2185   | 2015 | 0.149 | 0.04 | 0.693147 | 0.48045301 | 22.67894 | 0.062111 | 27.59 |
| 2185   | 2015 | 0.09  | 0.04 | 0.693147 | 0.48045301 | 22.67894 | 0.062111 | 27.59 |

|        |      |       |      |          |            |          |          |       |
|--------|------|-------|------|----------|------------|----------|----------|-------|
| 2185   | 2015 | -0.18 | 0.04 | 0.693147 | 0.48045301 | 22.67894 | 0.062111 | 27.59 |
| 2185   | 2015 | -0.02 | 0.04 | 0.693147 | 0.48045301 | 22.38677 | 0.062111 | 27.59 |
| 600495 | 2015 | -0.68 | 0    | 1.262242 | 1.5932539  | 21.89047 | 0.032406 | 30.79 |
| 403    | 2015 | -0.71 | 0    | 1.262242 | 1.5932539  | 20.95858 | 0.127196 | 22.61 |
| 795    | 2015 | -0.55 | 0    | 1.262242 | 1.5932539  | 21.37915 | -0.04985 | 42.29 |
| 795    | 2015 | -0.65 | 0    | 1.262242 | 1.5932539  | 21.37915 | -0.04985 | 42.29 |
| 795    | 2015 | -0.55 | 0    | 1.262242 | 1.5932539  | 21.37915 | -0.04985 | 42.29 |
| 983    | 2015 | -0.9  | 0    | 1.262242 | 1.5932539  | 24.67894 | 0.011094 | 54.4  |
| 600495 | 2015 | -0.68 | 0    | 1.262242 | 1.5932539  | 22.07735 | 0.032406 | 30.79 |
| 403    | 2015 | -0.71 | 0    | 1.262242 | 1.5932539  | 20.10336 | 0.127196 | 22.61 |
| 600495 | 2015 | -0.68 | 0    | 1.262242 | 1.5932539  | 22.07735 | 0.032406 | 30.79 |
| 795    | 2015 | -0.01 | 0    | 1.262242 | 1.5932539  | 21.11352 | -0.04985 | 42.29 |
| 795    | 2015 | -0.65 | 0    | 1.262242 | 1.5932539  | 21.37915 | -0.04985 | 42.29 |
| 600495 | 2015 | -0.66 | 0    | 1.262242 | 1.5932539  | 22.07735 | 0.032406 | 30.79 |
| 795    | 2015 | -0.65 | 0    | 1.262242 | 1.5932539  | 21.37915 | -0.04985 | 42.29 |
| 983    | 2015 | -0.58 | 0    | 1.262242 | 1.5932539  | 24.67894 | 0.011094 | 54.4  |
| 600495 | 2015 | -0.67 | 0    | 1.262242 | 1.5932539  | 22.07735 | 0.032406 | 30.79 |
| 825    | 2015 | -0.15 | 0    | 1.262242 | 1.5932539  | 25.00613 | -0.1732  | 63.49 |
| 983    | 2015 | -0.79 | 0    | 1.262242 | 1.5932539  | 23.95407 | 0.011094 | 54.4  |
| 983    | 2015 | -0.58 | 0    | 1.262242 | 1.5932539  | 24.67894 | 0.011094 | 54.4  |
| 825    | 2015 | -0.15 | 0    | 1.262242 | 1.5932539  | 25.00613 | -0.1732  | 63.49 |
| 600495 | 2015 | -0.64 | 0    | 1.262242 | 1.5932539  | 22.07735 | 0.032406 | 30.79 |
| 983    | 2015 | -0.9  | 0    | 1.262242 | 1.5932539  | 24.67894 | 0.011094 | 54.4  |
| 403    | 2015 | -0.71 | 0    | 1.262242 | 1.5932539  | 20.95858 | 0.127196 | 22.61 |
| 795    | 2015 | -0.65 | 0    | 1.262242 | 1.5932539  | 21.37915 | -0.04985 | 42.29 |
| 795    | 2015 | -0.65 | 0    | 1.262242 | 1.5932539  | 21.37915 | -0.04985 | 42.29 |
| 825    | 2015 | -0.15 | 0    | 1.262242 | 1.5932539  | 25.00613 | -0.1732  | 63.49 |
| 600495 | 2015 | -0.68 | 0    | 1.262242 | 1.5932539  | 22.07735 | 0.032406 | 30.79 |
| 825    | 2015 | -0.15 | 0    | 1.262242 | 1.5932539  | 25.00613 | -0.1732  | 63.49 |
| 795    | 2015 | -0.55 | 0    | 1.262242 | 1.5932539  | 21.37915 | -0.04985 | 42.29 |
| 825    | 2015 | -0.15 | 0    | 1.262242 | 1.5932539  | 24.93759 | -0.1732  | 63.49 |
| 300387 | 2015 | 0.905 | 0.12 | 0.166319 | 0.02766208 | 20.84276 | 0.104743 | 32.14 |
| 707    | 2015 | -0.14 | 0.12 | 0.166319 | 0.02766208 | 23.12864 | 0.010339 | 25.11 |
| 707    | 2015 | -0.14 | 0.12 | 0.166319 | 0.02766208 | 22.36563 | 0.010339 | 25.11 |
| 300387 | 2015 | 0.905 | 0.12 | 0.166319 | 0.02766208 | 20.84276 | 0.104743 | 32.14 |
| 300387 | 2015 | 0.905 | 0.12 | 0.166319 | 0.02766208 | 20.35567 | 0.104743 | 32.14 |
| 707    | 2015 | -0.14 | 0.12 | 0.166319 | 0.02766208 | 23.12864 | 0.010339 | 25.11 |
| 707    | 2015 | -0.14 | 0.12 | 0.166319 | 0.02766208 | 23.12864 | 0.010339 | 25.11 |
| 707    | 2015 | -0.14 | 0.12 | 0.166319 | 0.02766208 | 23.12864 | 0.010339 | 25.11 |
| 2586   | 2015 | -0.4  | 0.12 | 0.024382 | 0.0005945  | 22.00441 | 0.039113 | 41.49 |
| 601567 | 2015 | 0.543 | 0.12 | 0.024382 | 0.0005945  | 22.72773 | 0.182765 | 37.54 |
| 2048   | 2015 | 0.008 | 0.12 | 0.024382 | 0.0005945  | 23.07736 | 0.073318 | 16.97 |
| 2124   | 2015 | 0.802 | 0.12 | 0.024382 | 0.0005945  | 21.25316 | 0.095607 | 29.73 |
| 600177 | 2015 | -0.13 | 0.12 | 0.024382 | 0.0005945  | 24.91711 | 0.21484  | 31.51 |
| 2124   | 2015 | -0.52 | 0.12 | 0.024382 | 0.0005945  | 21.39993 | 0.095607 | 29.73 |
| 600884 | 2015 | 0.055 | 0.12 | 0.024382 | 0.0005945  | 23.04546 | 0.132857 | 32.5  |
| 600884 | 2015 | -0.52 | 0.12 | 0.024382 | 0.0005945  | 23.04546 | 0.132857 | 32.5  |
| 2048   | 2015 | -0.49 | 0.12 | 0.024382 | 0.0005945  | 23.07736 | 0.073318 | 16.97 |
| 2062   | 2015 | -0.22 | 0.12 | 0.024382 | 0.0005945  | 23.42444 | 0.07782  | 44.93 |
| 2124   | 2015 | 0.63  | 0.12 | 0.024382 | 0.0005945  | 21.39993 | 0.095607 | 29.73 |
| 300307 | 2015 | -0.02 | 0.12 | 0.024382 | 0.0005945  | 22.13355 | 0.025994 | 40.91 |
| 601789 | 2015 | -0.53 | 0.12 | 0.024382 | 0.0005945  | 23.22715 | 0.082233 | 39.04 |
| 2048   | 2015 | 0.573 | 0.12 | 0.024382 | 0.0005945  | 23.07736 | 0.073318 | 16.97 |
| 601137 | 2015 | 0.164 | 0.12 | 0.024382 | 0.0005945  | 21.72658 | 0.034503 | 49.47 |

|        |      |       |      |          |           |          |          |       |
|--------|------|-------|------|----------|-----------|----------|----------|-------|
| 300307 | 2015 | -0.04 | 0.12 | 0.024382 | 0.0005945 | 22.13355 | 0.025994 | 40.91 |
| 600152 | 2015 | -0.71 | 0.12 | 0.024382 | 0.0005945 | 21.05145 | 0.055087 | 22.27 |
| 600699 | 2015 | -0.27 | 0.12 | 0.024382 | 0.0005945 | 23.1577  | 0.104913 | 45.59 |
| 300076 | 2015 | 0.348 | 0.12 | 0.024382 | 0.0005945 | 20.92259 | 0.0046   | 30.02 |
| 2586   | 2015 | -0.54 | 0.12 | 0.024382 | 0.0005945 | 22.00441 | 0.039113 | 41.49 |
| 2062   | 2015 | -0.22 | 0.12 | 0.024382 | 0.0005945 | 23.42444 | 0.07782  | 44.93 |
| 2586   | 2015 | -0.4  | 0.12 | 0.024382 | 0.0005945 | 22.00441 | 0.039113 | 41.49 |
| 2048   | 2015 | -0.02 | 0.12 | 0.024382 | 0.0005945 | 23.07736 | 0.073318 | 16.97 |
| 600699 | 2015 | -0.25 | 0.12 | 0.024382 | 0.0005945 | 23.1577  | 0.104913 | 45.59 |
| 600177 | 2015 | 0.386 | 0.12 | 0.024382 | 0.0005945 | 24.91711 | 0.21484  | 31.51 |
| 600177 | 2015 | 0.043 | 0.12 | 0.024382 | 0.0005945 | 24.03481 | 0.21484  | 31.51 |
| 600699 | 2015 | -0.27 | 0.12 | 0.024382 | 0.0005945 | 23.1577  | 0.104913 | 45.59 |
| 600491 | 2015 | -0.36 | 0.12 | 0.024382 | 0.0005945 | 23.87392 | 0.054513 | 33.74 |
| 2120   | 2015 | -0.51 | 0.12 | 0.024382 | 0.0005945 | 20.63995 | 0.121845 | 37.2  |
| 600491 | 2015 | -0.36 | 0.12 | 0.024382 | 0.0005945 | 23.91715 | 0.054513 | 33.74 |
| 600884 | 2015 | -0.88 | 0.12 | 0.024382 | 0.0005945 | 23.04546 | 0.132857 | 32.5  |
| 300314 | 2015 | -0.3  | 0.12 | 0.024382 | 0.0005945 | 20.43928 | 0.064385 | 24.69 |
| 601789 | 2015 | -0.62 | 0.12 | 0.024382 | 0.0005945 | 22.09649 | 0.082233 | 39.04 |
| 2586   | 2015 | -0.04 | 0.12 | 0.024382 | 0.0005945 | 22.00441 | 0.039113 | 41.49 |
| 600152 | 2015 | -0.71 | 0.12 | 0.024382 | 0.0005945 | 21.05145 | 0.055087 | 22.27 |
| 601567 | 2015 | 0.26  | 0.12 | 0.024382 | 0.0005945 | 22.72773 | 0.182765 | 37.54 |
| 601137 | 2015 | 0.205 | 0.12 | 0.024382 | 0.0005945 | 21.72577 | 0.034503 | 49.47 |
| 600366 | 2015 | 0.351 | 0.12 | 0.024382 | 0.0005945 | 22.3015  | 0.101612 | 31.43 |
| 600130 | 2015 | -0.38 | 0.12 | 0.024382 | 0.0005945 | 20.5858  | 0.063217 | 16.4  |
| 2124   | 2015 | 0.007 | 0.12 | 0.024382 | 0.0005945 | 21.39993 | 0.095607 | 29.73 |
| 2048   | 2015 | 0.008 | 0.12 | 0.024382 | 0.0005945 | 23.07736 | 0.073318 | 16.97 |
| 300100 | 2015 | -0.31 | 0.12 | 0.024382 | 0.0005945 | 21.68964 | 0.115142 | 49.54 |
| 2119   | 2015 | -0.03 | 0.12 | 0.024382 | 0.0005945 | 21.08041 | -0.07675 | 19.72 |
| 2586   | 2015 | -0.04 | 0.12 | 0.024382 | 0.0005945 | 22.00441 | 0.039113 | 41.49 |
| 2103   | 2015 | -0.84 | 0.12 | 0.024382 | 0.0005945 | 21.48838 | 0.051014 | 22.13 |
| 2103   | 2015 | -0.84 | 0.12 | 0.024382 | 0.0005945 | 21.24088 | 0.051014 | 22.13 |
| 2119   | 2015 | 0.038 | 0.12 | 0.024382 | 0.0005945 | 21.08041 | -0.07675 | 19.72 |
| 600884 | 2015 | -0.11 | 0.12 | 0.024382 | 0.0005945 | 23.04546 | 0.132857 | 32.5  |
| 600366 | 2015 | 0.382 | 0.12 | 0.024382 | 0.0005945 | 22.15761 | 0.101612 | 31.43 |
| 300100 | 2015 | -0.64 | 0.12 | 0.024382 | 0.0005945 | 21.68964 | 0.115142 | 49.54 |
| 600366 | 2015 | 0.382 | 0.12 | 0.024382 | 0.0005945 | 22.3015  | 0.101612 | 31.43 |
| 601339 | 2015 | -0.46 | 0.12 | 0.024382 | 0.0005945 | 22.72269 | 0.048195 | 29.72 |
| 600699 | 2015 | -0.27 | 0.12 | 0.024382 | 0.0005945 | 23.1577  | 0.104913 | 45.59 |
| 601137 | 2015 | -0.02 | 0.12 | 0.024382 | 0.0005945 | 21.72577 | 0.034503 | 49.47 |
| 2062   | 2015 | -0.22 | 0.12 | 0.024382 | 0.0005945 | 23.42444 | 0.07782  | 44.93 |
| 600884 | 2015 | -0.05 | 0.12 | 0.024382 | 0.0005945 | 23.04546 | 0.132857 | 32.5  |
| 300307 | 2015 | -0.04 | 0.12 | 0.024382 | 0.0005945 | 22.13355 | 0.025994 | 40.91 |
| 2103   | 2015 | -0.84 | 0.12 | 0.024382 | 0.0005945 | 21.48838 | 0.051014 | 22.13 |
| 603088 | 2015 | 0.131 | 0.12 | 0.024382 | 0.0005945 | 20.16007 | 0.045299 | 33.08 |
| 2124   | 2015 | 0.117 | 0.12 | 0.024382 | 0.0005945 | 21.39993 | 0.095607 | 29.73 |
| 2164   | 2015 | -0.65 | 0.12 | 0.024382 | 0.0005945 | 21.08481 | 0.010332 | 31.08 |
| 300307 | 2015 | 0.176 | 0.12 | 0.024382 | 0.0005945 | 22.13355 | 0.025994 | 40.91 |
| 600884 | 2015 | -0.05 | 0.12 | 0.024382 | 0.0005945 | 22.80079 | 0.132857 | 32.5  |
| 2322   | 2015 | 0.44  | 0.12 | 0.024382 | 0.0005945 | 21.90571 | 0.037078 | 31.17 |
| 600130 | 2015 | -0.38 | 0.12 | 0.024382 | 0.0005945 | 21.04292 | 0.063217 | 16.4  |
| 2048   | 2015 | -0.49 | 0.12 | 0.024382 | 0.0005945 | 22.40902 | 0.073318 | 16.97 |
| 601789 | 2015 | -0.56 | 0.12 | 0.024382 | 0.0005945 | 23.22715 | 0.082233 | 39.04 |
| 600366 | 2015 | 0.125 | 0.12 | 0.024382 | 0.0005945 | 22.3015  | 0.101612 | 31.43 |
| 2473   | 2015 | -0.01 | 0.12 | 0.024382 | 0.0005945 | 20.10336 | -0.0436  | 18.13 |

|        |      |       |      |          |           |          |          |       |
|--------|------|-------|------|----------|-----------|----------|----------|-------|
| 603606 | 2015 | -0.49 | 0.12 | 0.024382 | 0.0005945 | 21.27959 | 0.062379 | 37.06 |
| 300329 | 2015 | -0.36 | 0.12 | 0.024382 | 0.0005945 | 20.60619 | 0.04024  | 29.99 |
| 2164   | 2015 | -0.21 | 0.12 | 0.024382 | 0.0005945 | 21.08481 | 0.010332 | 31.08 |
| 600130 | 2015 | -0.38 | 0.12 | 0.024382 | 0.0005945 | 21.04292 | 0.063217 | 16.4  |
| 2103   | 2015 | -0.84 | 0.12 | 0.024382 | 0.0005945 | 21.48838 | 0.051014 | 22.13 |
| 600177 | 2015 | -0.13 | 0.12 | 0.024382 | 0.0005945 | 24.91711 | 0.21484  | 31.51 |
| 601018 | 2015 | -0.77 | 0.12 | 0.024382 | 0.0005945 | 24.59121 | 0.081626 | 74.18 |
| 2103   | 2015 | -0.84 | 0.12 | 0.024382 | 0.0005945 | 21.48838 | 0.051014 | 22.13 |
| 2124   | 2015 | -0.19 | 0.12 | 0.024382 | 0.0005945 | 21.39993 | 0.095607 | 29.73 |
| 600491 | 2015 | -0.52 | 0.12 | 0.024382 | 0.0005945 | 23.91715 | 0.054513 | 33.74 |
| 2048   | 2015 | -0.27 | 0.12 | 0.024382 | 0.0005945 | 23.07736 | 0.073318 | 16.97 |
| 601339 | 2015 | -0.46 | 0.12 | 0.024382 | 0.0005945 | 23.13064 | 0.048195 | 29.72 |
| 601339 | 2015 | -0.46 | 0.12 | 0.024382 | 0.0005945 | 23.13064 | 0.048195 | 29.72 |
| 2124   | 2015 | 0.138 | 0.12 | 0.024382 | 0.0005945 | 21.39993 | 0.095607 | 29.73 |
| 600366 | 2015 | -0.27 | 0.12 | 0.024382 | 0.0005945 | 22.3015  | 0.101612 | 31.43 |
| 300163 | 2015 | -0.22 | 0.12 | 0.024382 | 0.0005945 | 20.87171 | 0.043077 | 35.49 |
| 600130 | 2015 | -0.38 | 0.12 | 0.024382 | 0.0005945 | 21.04292 | 0.063217 | 16.4  |
| 2473   | 2015 | -0.01 | 0.12 | 0.024382 | 0.0005945 | 20.10336 | -0.0436  | 18.13 |
| 601018 | 2015 | -0.89 | 0.12 | 0.024382 | 0.0005945 | 24.59121 | 0.081626 | 74.18 |
| 300118 | 2015 | -0.05 | 0.12 | 0.024382 | 0.0005945 | 22.86174 | 0.108845 | 32.68 |
| 600152 | 2015 | -0.71 | 0.12 | 0.024382 | 0.0005945 | 21.05145 | 0.055087 | 22.27 |
| 601018 | 2015 | -0.98 | 0.12 | 0.024382 | 0.0005945 | 24.59121 | 0.081626 | 74.18 |
| 601137 | 2015 | -0.02 | 0.12 | 0.024382 | 0.0005945 | 21.72658 | 0.034503 | 49.47 |
| 300076 | 2015 | 0.348 | 0.12 | 0.024382 | 0.0005945 | 20.83678 | 0.0046   | 30.02 |
| 601339 | 2015 | -0.46 | 0.12 | 0.024382 | 0.0005945 | 23.13064 | 0.048195 | 29.72 |
| 300329 | 2015 | -0.36 | 0.12 | 0.024382 | 0.0005945 | 20.60163 | 0.04024  | 29.99 |
| 2120   | 2015 | -0.51 | 0.12 | 0.024382 | 0.0005945 | 20.26575 | 0.121845 | 37.2  |
| 2124   | 2015 | 0.138 | 0.12 | 0.024382 | 0.0005945 | 21.39993 | 0.095607 | 29.73 |
| 600884 | 2015 | 0.44  | 0.12 | 0.024382 | 0.0005945 | 23.04546 | 0.132857 | 32.5  |
| 2120   | 2015 | -0.51 | 0.12 | 0.024382 | 0.0005945 | 20.63995 | 0.121845 | 37.2  |
| 600177 | 2015 | -0.13 | 0.12 | 0.024382 | 0.0005945 | 24.91711 | 0.21484  | 31.51 |
| 600366 | 2015 | 0.039 | 0.12 | 0.024382 | 0.0005945 | 22.3015  | 0.101612 | 31.43 |
| 300307 | 2015 | 0.006 | 0.12 | 0.024382 | 0.0005945 | 22.13355 | 0.025994 | 40.91 |
| 600130 | 2015 | -0.38 | 0.12 | 0.024382 | 0.0005945 | 21.04292 | 0.063217 | 16.4  |
| 2586   | 2015 | -0.31 | 0.12 | 0.024382 | 0.0005945 | 22.21757 | 0.039113 | 41.49 |
| 600366 | 2015 | 0.382 | 0.12 | 0.024382 | 0.0005945 | 22.3015  | 0.101612 | 31.43 |
| 600114 | 2015 | -0.04 | 0.12 | 0.024382 | 0.0005945 | 21.56242 | 0.099608 | 25.02 |
| 300329 | 2015 | -0.36 | 0.12 | 0.024382 | 0.0005945 | 20.60619 | 0.04024  | 29.99 |
| 603606 | 2015 | -0.49 | 0.12 | 0.024382 | 0.0005945 | 21.27959 | 0.062379 | 37.06 |
| 2164   | 2015 | -0.21 | 0.12 | 0.024382 | 0.0005945 | 21.08481 | 0.010332 | 31.08 |
| 600114 | 2015 | -0.36 | 0.12 | 0.024382 | 0.0005945 | 21.56242 | 0.099608 | 25.02 |
| 300100 | 2015 | -0.38 | 0.12 | 0.024382 | 0.0005945 | 21.68964 | 0.115142 | 49.54 |
| 601137 | 2015 | 0.205 | 0.12 | 0.024382 | 0.0005945 | 21.72658 | 0.034503 | 49.47 |
| 2473   | 2015 | -0.01 | 0.12 | 0.024382 | 0.0005945 | 20.10336 | -0.0436  | 18.13 |
| 600152 | 2015 | -0.71 | 0.12 | 0.024382 | 0.0005945 | 21.18362 | 0.055087 | 22.27 |
| 601339 | 2015 | -0.46 | 0.12 | 0.024382 | 0.0005945 | 23.13064 | 0.048195 | 29.72 |
| 2119   | 2015 | 0.098 | 0.12 | 0.024382 | 0.0005945 | 21.08041 | -0.07675 | 19.72 |
| 2119   | 2015 | 0.098 | 0.12 | 0.024382 | 0.0005945 | 21.08041 | -0.07675 | 19.72 |
| 2048   | 2015 | -0.65 | 0.12 | 0.024382 | 0.0005945 | 23.07736 | 0.073318 | 16.97 |
| 600152 | 2015 | -0.71 | 0.12 | 0.024382 | 0.0005945 | 21.05145 | 0.055087 | 22.27 |
| 2120   | 2015 | -0.51 | 0.12 | 0.024382 | 0.0005945 | 20.63995 | 0.121845 | 37.2  |
| 600366 | 2015 | 0.382 | 0.12 | 0.024382 | 0.0005945 | 22.3015  | 0.101612 | 31.43 |
| 2119   | 2015 | 0.76  | 0.12 | 0.024382 | 0.0005945 | 20.91733 | -0.07675 | 19.72 |
| 600884 | 2015 | -0.31 | 0.12 | 0.024382 | 0.0005945 | 23.04546 | 0.132857 | 32.5  |

|        |      |       |      |          |           |          |          |        |
|--------|------|-------|------|----------|-----------|----------|----------|--------|
| 600177 | 2015 | -0.13 | 0.12 | 0.024382 | 0.0005945 | 24.91711 | 0.21484  | 31.51  |
| 601789 | 2015 | -0.56 | 0.12 | 0.024382 | 0.0005945 | 23.22715 | 0.082233 | 39.04  |
| 300163 | 2015 | -0.22 | 0.12 | 0.024382 | 0.0005945 | 20.87171 | 0.043077 | 35.49  |
| 600366 | 2015 | 0.039 | 0.12 | 0.024382 | 0.0005945 | 22.3015  | 0.101612 | 31.43  |
| 2322   | 2015 | 0.44  | 0.12 | 0.024382 | 0.0005945 | 21.90571 | 0.037078 | 31.17  |
| 300118 | 2015 | -0.53 | 0.12 | 0.024382 | 0.0005945 | 22.71757 | 0.108845 | 32.68  |
| 2119   | 2015 | 0.098 | 0.12 | 0.024382 | 0.0005945 | 21.08041 | -0.07675 | 19.72  |
| 600366 | 2015 | -0.6  | 0.12 | 0.024382 | 0.0005945 | 22.3015  | 0.101612 | 31.43  |
| 600366 | 2015 | 0.726 | 0.12 | 0.024382 | 0.0005945 | 22.3015  | 0.101612 | 31.43  |
| 300118 | 2015 | -0.49 | 0.12 | 0.024382 | 0.0005945 | 22.86174 | 0.108845 | 32.68  |
| 2048   | 2015 | -0.65 | 0.12 | 0.024382 | 0.0005945 | 23.07736 | 0.073318 | 16.97  |
| 601567 | 2015 | -0.24 | 0.12 | 0.024382 | 0.0005945 | 22.72773 | 0.182765 | 37.54  |
| 300118 | 2015 | -0.05 | 0.12 | 0.024382 | 0.0005945 | 22.86174 | 0.108845 | 32.68  |
| 601339 | 2015 | -0.46 | 0.12 | 0.024382 | 0.0005945 | 23.13064 | 0.048195 | 29.72  |
| 300314 | 2015 | -0.3  | 0.12 | 0.024382 | 0.0005945 | 20.4678  | 0.064385 | 24.69  |
| 603088 | 2015 | -0.26 | 0.12 | 0.024382 | 0.0005945 | 20.16007 | 0.045299 | 33.08  |
| 601567 | 2015 | -0.05 | 0.12 | 0.024382 | 0.0005945 | 22.35987 | 0.182765 | 37.54  |
| 2048   | 2015 | 0.008 | 0.12 | 0.024382 | 0.0005945 | 23.07736 | 0.073318 | 16.97  |
| 600114 | 2015 | -0.23 | 0.12 | 0.024382 | 0.0005945 | 21.56242 | 0.099608 | 25.02  |
| 603606 | 2015 | -0.49 | 0.12 | 0.024382 | 0.0005945 | 21.27959 | 0.062379 | 37.06  |
| 2048   | 2015 | -0.65 | 0.12 | 0.024382 | 0.0005945 | 23.07736 | 0.073318 | 16.97  |
| 300100 | 2015 | -0.76 | 0.12 | 0.024382 | 0.0005945 | 21.68964 | 0.115142 | 49.54  |
| 2322   | 2015 | 1.764 | 0.12 | 0.024382 | 0.0005945 | 21.90571 | 0.037078 | 31.17  |
| 601567 | 2015 | 0.018 | 0.12 | 0.024382 | 0.0005945 | 22.72773 | 0.182765 | 37.54  |
| 600177 | 2015 | -0.13 | 0.12 | 0.024382 | 0.0005945 | 24.91711 | 0.21484  | 31.51  |
| 300076 | 2015 | -0.1  | 0.12 | 0.024382 | 0.0005945 | 20.83678 | 0.0046   | 30.02  |
| 2062   | 2015 | -0.22 | 0.12 | 0.024382 | 0.0005945 | 23.42444 | 0.07782  | 44.93  |
| 2048   | 2015 | -0.65 | 0.12 | 0.024382 | 0.0005945 | 23.07736 | 0.073318 | 16.97  |
| 600366 | 2015 | -0.6  | 0.12 | 0.024382 | 0.0005945 | 22.3015  | 0.101612 | 31.43  |
| 601789 | 2015 | -0.49 | 0.12 | 0.024382 | 0.0005945 | 23.22715 | 0.082233 | 39.04  |
| 600699 | 2015 | -0.37 | 0.12 | 0.024382 | 0.0005945 | 23.1577  | 0.104913 | 45.59  |
| 600366 | 2015 | 0.288 | 0.12 | 0.024382 | 0.0005945 | 22.3015  | 0.101612 | 31.43  |
| 300118 | 2015 | -0.42 | 0.12 | 0.024382 | 0.0005945 | 22.86174 | 0.108845 | 32.68  |
| 600177 | 2015 | -0.13 | 0.12 | 0.024382 | 0.0005945 | 24.91711 | 0.21484  | 31.51  |
| 601567 | 2015 | -0.15 | 0.12 | 0.024382 | 0.0005945 | 22.72773 | 0.182765 | 37.54  |
| 600114 | 2015 | -0.36 | 0.12 | 0.024382 | 0.0005945 | 21.35235 | 0.099608 | 25.02  |
| 600114 | 2015 | -0.3  | 0.12 | 0.024382 | 0.0005945 | 21.56242 | 0.099608 | 25.02  |
| 600366 | 2015 | 0.288 | 0.12 | 0.024382 | 0.0005945 | 22.3015  | 0.101612 | 31.43  |
| 600366 | 2015 | -0.6  | 0.12 | 0.024382 | 0.0005945 | 22.3015  | 0.101612 | 31.43  |
| 300163 | 2015 | -0.22 | 0.12 | 0.024382 | 0.0005945 | 20.87171 | 0.043077 | 35.49  |
| 600491 | 2015 | -0.63 | 0.12 | 0.024382 | 0.0005945 | 23.91715 | 0.054513 | 33.74  |
| 603088 | 2015 | 0.131 | 0.12 | 0.024382 | 0.0005945 | 20.16007 | 0.045299 | 33.08  |
| 2322   | 2015 | 1.764 | 0.12 | 0.024382 | 0.0005945 | 21.90571 | 0.037078 | 31.17  |
| 600152 | 2015 | -0.71 | 0.12 | 0.024382 | 0.0005945 | 21.05145 | 0.055087 | 22.27  |
| 300314 | 2015 | -0.3  | 0.12 | 0.024382 | 0.0005945 | 20.43928 | 0.064385 | 24.69  |
| 600537 | 2015 | 0.044 | 0.12 | 0.024382 | 0.0005945 | 21.95167 | 0.084204 | 33.332 |
| 603088 | 2015 | -0.22 | 0.12 | 0.024382 | 0.0005945 | 20.16007 | 0.045299 | 33.08  |
| 2119   | 2015 | -0.23 | 0.12 | 0.024382 | 0.0005945 | 21.08041 | -0.07675 | 19.72  |
| 2322   | 2015 | 1.764 | 0.12 | 0.024382 | 0.0005945 | 21.76655 | 0.037078 | 31.17  |
| 2120   | 2015 | -0.51 | 0.12 | 0.024382 | 0.0005945 | 20.63995 | 0.121845 | 37.2   |
| 2164   | 2015 | -0.21 | 0.12 | 0.024382 | 0.0005945 | 21.08481 | 0.010332 | 31.08  |
| 600114 | 2015 | -0.04 | 0.12 | 0.024382 | 0.0005945 | 21.56242 | 0.099608 | 25.02  |
| 601789 | 2015 | -0.56 | 0.12 | 0.024382 | 0.0005945 | 23.22715 | 0.082233 | 39.04  |
| 601789 | 2015 | -0.45 | 0.12 | 0.024382 | 0.0005945 | 23.22715 | 0.082233 | 39.04  |

|        |      |       |      |          |           |          |          |        |
|--------|------|-------|------|----------|-----------|----------|----------|--------|
| 2120   | 2015 | -0.51 | 0.12 | 0.024382 | 0.0005945 | 20.63995 | 0.121845 | 37.2   |
| 600152 | 2015 | -0.71 | 0.12 | 0.024382 | 0.0005945 | 21.05145 | 0.055087 | 22.27  |
| 600114 | 2015 | -0.51 | 0.12 | 0.024382 | 0.0005945 | 21.56242 | 0.099608 | 25.02  |
| 603088 | 2015 | -0.26 | 0.12 | 0.024382 | 0.0005945 | 20.14578 | 0.045299 | 33.08  |
| 600491 | 2015 | -0.82 | 0.12 | 0.024382 | 0.0005945 | 23.91715 | 0.054513 | 33.74  |
| 300314 | 2015 | -0.3  | 0.12 | 0.024382 | 0.0005945 | 20.43928 | 0.064385 | 24.69  |
| 300076 | 2015 | -0.05 | 0.12 | 0.024382 | 0.0005945 | 20.83678 | 0.0046   | 30.02  |
| 600884 | 2015 | 0.44  | 0.12 | 0.024382 | 0.0005945 | 23.04546 | 0.132857 | 32.5   |
| 300100 | 2015 | -0.76 | 0.12 | 0.024382 | 0.0005945 | 21.68964 | 0.115142 | 49.54  |
| 600152 | 2015 | -0.71 | 0.12 | 0.024382 | 0.0005945 | 21.05145 | 0.055087 | 22.27  |
| 300076 | 2015 | 0.045 | 0.12 | 0.024382 | 0.0005945 | 20.83678 | 0.0046   | 30.02  |
| 600177 | 2015 | 0.386 | 0.12 | 0.024382 | 0.0005945 | 24.91711 | 0.21484  | 31.51  |
| 603606 | 2015 | -0.49 | 0.12 | 0.024382 | 0.0005945 | 21.2627  | 0.062379 | 37.06  |
| 2124   | 2015 | 0.802 | 0.12 | 0.024382 | 0.0005945 | 21.39993 | 0.095607 | 29.73  |
| 2062   | 2015 | -0.22 | 0.12 | 0.024382 | 0.0005945 | 23.0228  | 0.07782  | 44.93  |
| 600114 | 2015 | -0.51 | 0.12 | 0.024382 | 0.0005945 | 21.56242 | 0.099608 | 25.02  |
| 300307 | 2015 | -0.02 | 0.12 | 0.024382 | 0.0005945 | 22.13355 | 0.025994 | 40.91  |
| 2164   | 2015 | 0.009 | 0.12 | 0.024382 | 0.0005945 | 21.32515 | 0.010332 | 31.08  |
| 300307 | 2015 | 0.093 | 0.12 | 0.024382 | 0.0005945 | 22.14354 | 0.025994 | 40.91  |
| 300100 | 2015 | -0.51 | 0.12 | 0.024382 | 0.0005945 | 21.68964 | 0.115142 | 49.54  |
| 601789 | 2015 | -0.49 | 0.12 | 0.024382 | 0.0005945 | 23.22715 | 0.082233 | 39.04  |
| 300100 | 2015 | -0.76 | 0.12 | 0.024382 | 0.0005945 | 21.68964 | 0.115142 | 49.54  |
| 300100 | 2015 | -0.76 | 0.12 | 0.024382 | 0.0005945 | 21.68964 | 0.115142 | 49.54  |
| 300100 | 2015 | -0.31 | 0.12 | 0.024382 | 0.0005945 | 22.12595 | 0.115142 | 49.54  |
| 300307 | 2015 | 0.176 | 0.12 | 0.024382 | 0.0005945 | 22.13355 | 0.025994 | 40.91  |
| 300100 | 2015 | -0.76 | 0.12 | 0.024382 | 0.0005945 | 21.68964 | 0.115142 | 49.54  |
| 600177 | 2015 | -0.13 | 0.12 | 0.024382 | 0.0005945 | 24.91711 | 0.21484  | 31.51  |
| 600537 | 2015 | 0.044 | 0.12 | 0.024382 | 0.0005945 | 22.62916 | 0.084204 | 33.332 |
| 2473   | 2015 | -0.01 | 0.12 | 0.024382 | 0.0005945 | 20.10336 | -0.0436  | 18.13  |
| 300314 | 2015 | -0.3  | 0.12 | 0.024382 | 0.0005945 | 20.43928 | 0.064385 | 24.69  |
| 2124   | 2015 | 0.138 | 0.12 | 0.024382 | 0.0005945 | 21.39993 | 0.095607 | 29.73  |
| 300118 | 2015 | -0.55 | 0.12 | 0.024382 | 0.0005945 | 22.86174 | 0.108845 | 32.68  |
| 600114 | 2015 | -0.18 | 0.12 | 0.024382 | 0.0005945 | 21.56242 | 0.099608 | 25.02  |
| 2473   | 2015 | -0.01 | 0.12 | 0.024382 | 0.0005945 | 20.10336 | -0.0436  | 18.13  |
| 600366 | 2015 | 0.382 | 0.12 | 0.024382 | 0.0005945 | 22.3015  | 0.101612 | 31.43  |
| 300307 | 2015 | -0.35 | 0.12 | 0.024382 | 0.0005945 | 22.13355 | 0.025994 | 40.91  |
| 600366 | 2015 | 0.382 | 0.12 | 0.024382 | 0.0005945 | 22.3015  | 0.101612 | 31.43  |
| 2103   | 2015 | -0.84 | 0.12 | 0.024382 | 0.0005945 | 21.48838 | 0.051014 | 22.13  |
| 600537 | 2015 | 0.044 | 0.12 | 0.024382 | 0.0005945 | 22.62916 | 0.084204 | 33.332 |
| 300163 | 2015 | -0.22 | 0.12 | 0.024382 | 0.0005945 | 20.54671 | 0.043077 | 35.49  |
| 2048   | 2015 | 0.008 | 0.12 | 0.024382 | 0.0005945 | 23.07736 | 0.073318 | 16.97  |
| 300163 | 2015 | -0.22 | 0.12 | 0.024382 | 0.0005945 | 20.87171 | 0.043077 | 35.49  |
| 2322   | 2015 | 1.764 | 0.12 | 0.024382 | 0.0005945 | 21.90571 | 0.037078 | 31.17  |
| 600130 | 2015 | -0.38 | 0.12 | 0.024382 | 0.0005945 | 21.04292 | 0.063217 | 16.4   |
| 601018 | 2015 | -0.89 | 0.12 | 0.024382 | 0.0005945 | 24.38099 | 0.081626 | 74.18  |
| 600366 | 2015 | 0.111 | 0.12 | 0.024382 | 0.0005945 | 22.3015  | 0.101612 | 31.43  |
| 601339 | 2015 | -0.46 | 0.12 | 0.024382 | 0.0005945 | 23.13064 | 0.048195 | 29.72  |
| 601018 | 2015 | -0.98 | 0.12 | 0.024382 | 0.0005945 | 24.59121 | 0.081626 | 74.18  |
| 600491 | 2015 | -0.95 | 0.12 | 0.024382 | 0.0005945 | 23.91715 | 0.054513 | 33.74  |
| 601567 | 2015 | 0.235 | 0.12 | 0.024382 | 0.0005945 | 22.72773 | 0.182765 | 37.54  |
| 600537 | 2015 | 0.044 | 0.12 | 0.024382 | 0.0005945 | 22.62916 | 0.084204 | 33.332 |
| 600152 | 2015 | -0.71 | 0.12 | 0.024382 | 0.0005945 | 21.05145 | 0.055087 | 22.27  |
| 600130 | 2015 | -0.38 | 0.12 | 0.024382 | 0.0005945 | 21.04292 | 0.063217 | 16.4   |
| 600884 | 2015 | -0.46 | 0.12 | 0.024382 | 0.0005945 | 23.04546 | 0.132857 | 32.5   |

|        |      |       |      |          |            |          |          |        |
|--------|------|-------|------|----------|------------|----------|----------|--------|
| 2322   | 2015 | 1.516 | 0.12 | 0.024382 | 0.0005945  | 21.90571 | 0.037078 | 31.17  |
| 2124   | 2015 | 0.802 | 0.12 | 0.024382 | 0.0005945  | 21.39993 | 0.095607 | 29.73  |
| 600537 | 2015 | 0.044 | 0.12 | 0.024382 | 0.0005945  | 22.62916 | 0.084204 | 33.332 |
| 603606 | 2015 | -0.49 | 0.12 | 0.024382 | 0.0005945  | 21.27959 | 0.062379 | 37.06  |
| 601567 | 2015 | -0.24 | 0.12 | 0.024382 | 0.0005945  | 22.72773 | 0.182765 | 37.54  |
| 300076 | 2015 | -0.24 | 0.12 | 0.024382 | 0.0005945  | 20.83678 | 0.0046   | 30.02  |
| 2048   | 2015 | -0.65 | 0.12 | 0.024382 | 0.0005945  | 23.07736 | 0.073318 | 16.97  |
| 600699 | 2015 | -0.27 | 0.12 | 0.024382 | 0.0005945  | 22.79534 | 0.104913 | 45.59  |
| 300163 | 2015 | -0.22 | 0.12 | 0.024382 | 0.0005945  | 20.87171 | 0.043077 | 35.49  |
| 300100 | 2015 | -0.55 | 0.12 | 0.024382 | 0.0005945  | 21.68964 | 0.115142 | 49.54  |
| 2586   | 2015 | -0.27 | 0.12 | 0.024382 | 0.0005945  | 22.00441 | 0.039113 | 41.49  |
| 600491 | 2015 | -0.63 | 0.12 | 0.024382 | 0.0005945  | 23.91715 | 0.054513 | 33.74  |
| 600537 | 2015 | 0.044 | 0.12 | 0.024382 | 0.0005945  | 22.62916 | 0.084204 | 33.332 |
| 2048   | 2015 | -0.29 | 0.12 | 0.024382 | 0.0005945  | 23.07736 | 0.073318 | 16.97  |
| 300090 | 2015 | -0.32 | 0.09 | 1.209382 | 1.4626042  | 23.20032 | 0.13103  | 16.72  |
| 300090 | 2015 | -0.2  | 0.09 | 1.209382 | 1.4626042  | 22.96079 | 0.13103  | 16.72  |
| 300090 | 2015 | 0.038 | 0.09 | 1.209382 | 1.4626042  | 23.20032 | 0.13103  | 16.72  |
| 300090 | 2015 | -0.48 | 0.09 | 1.209382 | 1.4626042  | 23.20032 | 0.13103  | 16.72  |
| 300090 | 2015 | -0.35 | 0.09 | 1.209382 | 1.4626042  | 23.20032 | 0.13103  | 16.72  |
| 300090 | 2015 | -0.2  | 0.09 | 1.209382 | 1.4626042  | 23.20032 | 0.13103  | 16.72  |
| 850    | 2015 | -0.1  | 0.09 | 1.209382 | 1.4626042  | 22.87174 | 0.00826  | 46.4   |
| 300090 | 2015 | -0.2  | 0.09 | 1.209382 | 1.4626042  | 23.20032 | 0.13103  | 16.72  |
| 850    | 2015 | -0.1  | 0.09 | 1.209382 | 1.4626042  | 22.87174 | 0.00826  | 46.4   |
| 300090 | 2015 | -0.2  | 0.09 | 1.209382 | 1.4626042  | 23.20032 | 0.13103  | 16.72  |
| 300090 | 2015 | -0.48 | 0.09 | 1.209382 | 1.4626042  | 23.20032 | 0.13103  | 16.72  |
| 850    | 2015 | -0.1  | 0.09 | 1.209382 | 1.4626042  | 22.81939 | 0.00826  | 46.4   |
| 300090 | 2015 | -0.47 | 0.09 | 1.209382 | 1.4626042  | 23.20032 | 0.13103  | 16.72  |
| 2535   | 2015 | -0.58 | 0.07 | 0.928179 | 0.86151623 | 22.65984 | -0.10192 | 36.19  |
| 2535   | 2015 | -0.53 | 0.07 | 0.928179 | 0.86151623 | 22.65984 | -0.10192 | 36.19  |
| 600569 | 2015 | -0.55 | 0.07 | 0.928179 | 0.86151623 | 24.19606 | -0.4336  | 60.14  |
| 600207 | 2015 | -0.74 | 0.07 | 0.928179 | 0.86151623 | 21.58006 | 0.025585 | 59.11  |
| 2535   | 2015 | -0.51 | 0.07 | 0.928179 | 0.86151623 | 22.65984 | -0.10192 | 36.19  |
| 600207 | 2015 | -0.69 | 0.07 | 0.928179 | 0.86151623 | 21.58006 | 0.025585 | 59.11  |
| 600207 | 2015 | -0.82 | 0.07 | 0.928179 | 0.86151623 | 21.58006 | 0.025585 | 59.11  |
| 2535   | 2015 | -0.58 | 0.07 | 0.928179 | 0.86151623 | 22.65984 | -0.10192 | 36.19  |
| 2535   | 2015 | -0.58 | 0.07 | 0.928179 | 0.86151623 | 22.65984 | -0.10192 | 36.19  |
| 600207 | 2015 | -0.82 | 0.07 | 0.928179 | 0.86151623 | 21.58006 | 0.025585 | 59.11  |
| 600569 | 2015 | -0.55 | 0.07 | 0.928179 | 0.86151623 | 24.15027 | -0.4336  | 60.14  |
| 2535   | 2015 | -0.58 | 0.07 | 0.928179 | 0.86151623 | 22.64518 | -0.10192 | 36.19  |
| 2535   | 2015 | -0.58 | 0.07 | 0.928179 | 0.86151623 | 22.65984 | -0.10192 | 36.19  |
| 2535   | 2015 | -0.58 | 0.07 | 0.928179 | 0.86151623 | 22.65984 | -0.10192 | 36.19  |
| 2535   | 2015 | -0.43 | 0.07 | 0.928179 | 0.86151623 | 22.65984 | -0.10192 | 36.19  |
| 600207 | 2015 | -0.69 | 0.07 | 0.928179 | 0.86151623 | 21.57538 | 0.025585 | 59.11  |
| 2535   | 2015 | -0.43 | 0.07 | 0.928179 | 0.86151623 | 22.65984 | -0.10192 | 36.19  |
| 600207 | 2015 | -0.82 | 0.07 | 0.928179 | 0.86151623 | 21.58006 | 0.025585 | 59.11  |
| 2535   | 2015 | -0.71 | 0.07 | 0.928179 | 0.86151623 | 22.65984 | -0.10192 | 36.19  |
| 600207 | 2015 | -0.82 | 0.07 | 0.928179 | 0.86151623 | 21.58006 | 0.025585 | 59.11  |
| 600569 | 2015 | -0.55 | 0.07 | 0.928179 | 0.86151623 | 24.19606 | -0.4336  | 60.14  |
| 600137 | 2015 | -0.77 | 0.04 | 1.171331 | 1.3720171  | 20.11639 | -0.04697 | 42.68  |
| 600137 | 2015 | -0.77 | 0.04 | 1.171331 | 1.3720171  | 20.10336 | -0.04697 | 42.68  |
| 858    | 2015 | -0.17 | 0.04 | 1.171331 | 1.3720171  | 24.68497 | 0.144559 | 36     |
| 858    | 2015 | -0.8  | 0.04 | 1.171331 | 1.3720171  | 24.68497 | 0.144559 | 36     |
| 858    | 2015 | -0.78 | 0.04 | 1.171331 | 1.3720171  | 24.22415 | 0.144559 | 36     |
| 600137 | 2015 | -0.77 | 0.04 | 1.171331 | 1.3720171  | 20.11639 | -0.04697 | 42.68  |



|        |      |       |      |          |            |          |          |       |
|--------|------|-------|------|----------|------------|----------|----------|-------|
| 2386   | 2015 | -0.3  | 0.04 | 1.171331 | 1.3720171  | 23.32372 | -0.0021  | 17.52 |
| 2386   | 2015 | -0.3  | 0.04 | 1.171331 | 1.3720171  | 23.32372 | -0.0021  | 17.52 |
| 858    | 2015 | -0.8  | 0.04 | 1.171331 | 1.3720171  | 24.68497 | 0.144559 | 36    |
| 858    | 2015 | -0.65 | 0.04 | 1.171331 | 1.3720171  | 24.68497 | 0.144559 | 36    |
| 2386   | 2015 | -0.36 | 0.04 | 1.171331 | 1.3720171  | 23.32372 | -0.0021  | 17.52 |
| 858    | 2015 | -0.68 | 0.04 | 1.171331 | 1.3720171  | 24.68497 | 0.144559 | 36    |
| 2386   | 2015 | -0.36 | 0.04 | 1.171331 | 1.3720171  | 23.32372 | -0.0021  | 17.52 |
| 858    | 2015 | -0.72 | 0.04 | 1.171331 | 1.3720171  | 24.68497 | 0.144559 | 36    |
| 858    | 2015 | -0.8  | 0.04 | 1.171331 | 1.3720171  | 24.68497 | 0.144559 | 36    |
| 2386   | 2015 | -0.3  | 0.04 | 1.171331 | 1.3720171  | 23.32372 | -0.0021  | 17.52 |
| 858    | 2015 | -0.68 | 0.04 | 1.171331 | 1.3720171  | 24.68497 | 0.144559 | 36    |
| 858    | 2015 | -0.8  | 0.04 | 1.171331 | 1.3720171  | 24.68497 | 0.144559 | 36    |
| 2386   | 2015 | -0.39 | 0.04 | 1.171331 | 1.3720171  | 23.14905 | -0.0021  | 17.52 |
| 2386   | 2015 | -0.65 | 0.04 | 1.171331 | 1.3720171  | 23.32372 | -0.0021  | 17.52 |
| 422    | 2015 | -0.09 | 0.12 | 0.147414 | 0.02173098 | 24.41163 | 0.006731 | 17.08 |
| 600141 | 2015 | -0.39 | 0.12 | 0.147414 | 0.02173098 | 23.78541 | 0.016939 | 23.41 |
| 422    | 2015 | -0.21 | 0.12 | 0.147414 | 0.02173098 | 24.41163 | 0.006731 | 17.08 |
| 600141 | 2015 | -0.24 | 0.12 | 0.147414 | 0.02173098 | 23.78541 | 0.016939 | 23.41 |
| 600141 | 2015 | 0.455 | 0.12 | 0.147414 | 0.02173098 | 23.78541 | 0.016939 | 23.41 |
| 826    | 2015 | -0.23 | 0.12 | 0.147414 | 0.02173098 | 23.48635 | 0.14876  | 19.99 |
| 422    | 2015 | -0.08 | 0.12 | 0.147414 | 0.02173098 | 24.41163 | 0.006731 | 17.08 |
| 600141 | 2015 | -0.6  | 0.12 | 0.147414 | 0.02173098 | 23.78541 | 0.016939 | 23.41 |
| 422    | 2015 | -0.08 | 0.12 | 0.147414 | 0.02173098 | 24.41163 | 0.006731 | 17.08 |
| 826    | 2015 | 0.512 | 0.12 | 0.147414 | 0.02173098 | 23.48635 | 0.14876  | 19.99 |
| 600298 | 2015 | 0.39  | 0.12 | 0.147414 | 0.02173098 | 22.54729 | 0.097545 | 39.37 |
| 826    | 2015 | -0.49 | 0.12 | 0.147414 | 0.02173098 | 23.48635 | 0.14876  | 19.99 |
| 422    | 2015 | -0.21 | 0.12 | 0.147414 | 0.02173098 | 24.41163 | 0.006731 | 17.08 |
| 600141 | 2015 | -0.6  | 0.12 | 0.147414 | 0.02173098 | 23.78541 | 0.016939 | 23.41 |
| 600298 | 2015 | 0.328 | 0.12 | 0.147414 | 0.02173098 | 22.54729 | 0.097545 | 39.37 |
| 600141 | 2015 | -0.17 | 0.12 | 0.147414 | 0.02173098 | 23.78541 | 0.016939 | 23.41 |
| 422    | 2015 | 0.478 | 0.12 | 0.147414 | 0.02173098 | 24.41163 | 0.006731 | 17.08 |
| 422    | 2015 | -0.04 | 0.12 | 0.147414 | 0.02173098 | 24.41163 | 0.006731 | 17.08 |
| 422    | 2015 | -0.08 | 0.12 | 0.147414 | 0.02173098 | 23.56972 | 0.006731 | 17.08 |
| 600298 | 2015 | -0.07 | 0.12 | 0.147414 | 0.02173098 | 22.54729 | 0.097545 | 39.37 |
| 600141 | 2015 | -0.17 | 0.12 | 0.147414 | 0.02173098 | 23.31219 | 0.016939 | 23.41 |
| 600298 | 2015 | 0.39  | 0.12 | 0.147414 | 0.02173098 | 22.54729 | 0.097545 | 39.37 |
| 600141 | 2015 | -0.18 | 0.12 | 0.147414 | 0.02173098 | 23.78541 | 0.016939 | 23.41 |
| 600298 | 2015 | -0.07 | 0.12 | 0.147414 | 0.02173098 | 22.54729 | 0.097545 | 39.37 |
| 422    | 2015 | 0.478 | 0.12 | 0.147414 | 0.02173098 | 24.41163 | 0.006731 | 17.08 |
| 422    | 2015 | 0.478 | 0.12 | 0.147414 | 0.02173098 | 24.41163 | 0.006731 | 17.08 |
| 826    | 2015 | -0.23 | 0.12 | 0.147414 | 0.02173098 | 23.48635 | 0.14876  | 19.99 |
| 826    | 2015 | -0.27 | 0.12 | 0.147414 | 0.02173098 | 23.48635 | 0.14876  | 19.99 |
| 826    | 2015 | 0.512 | 0.12 | 0.147414 | 0.02173098 | 23.48635 | 0.14876  | 19.99 |
| 600141 | 2015 | -0.32 | 0.12 | 0.147414 | 0.02173098 | 23.78541 | 0.016939 | 23.41 |
| 600141 | 2015 | -0.33 | 0.12 | 0.147414 | 0.02173098 | 23.78541 | 0.016939 | 23.41 |
| 600298 | 2015 | -0.07 | 0.12 | 0.147414 | 0.02173098 | 22.32452 | 0.097545 | 39.37 |
| 826    | 2015 | -0.56 | 0.12 | 0.147414 | 0.02173098 | 23.48635 | 0.14876  | 19.99 |
| 422    | 2015 | -0.08 | 0.12 | 0.147414 | 0.02173098 | 24.41163 | 0.006731 | 17.08 |
| 600141 | 2015 | 0.455 | 0.12 | 0.147414 | 0.02173098 | 23.78541 | 0.016939 | 23.41 |
| 826    | 2015 | -0.23 | 0.12 | 0.147414 | 0.02173098 | 23.3174  | 0.14876  | 19.99 |
| 600298 | 2015 | -0.07 | 0.12 | 0.147414 | 0.02173098 | 22.54729 | 0.097545 | 39.37 |
| 600298 | 2015 | -0.07 | 0.12 | 0.147414 | 0.02173098 | 22.54729 | 0.097545 | 39.37 |
| 422    | 2015 | -0.08 | 0.12 | 0.147414 | 0.02173098 | 24.41163 | 0.006731 | 17.08 |
| 826    | 2015 | -0.55 | 0.12 | 0.147414 | 0.02173098 | 23.48635 | 0.14876  | 19.99 |

|        |      |       |      |          |            |          |          |       |
|--------|------|-------|------|----------|------------|----------|----------|-------|
| 600298 | 2015 | -0.07 | 0.12 | 0.147414 | 0.02173098 | 22.54729 | 0.097545 | 39.37 |
| 2176   | 2015 | -0.06 | 0.08 | 1.344313 | 1.8071763  | 22.63785 | 0.01147  | 19.48 |
| 300095 | 2015 | -0.34 | 0.08 | 1.344313 | 1.8071763  | 20.90044 | 0.066437 | 31.89 |
| 2176   | 2015 | 0.733 | 0.08 | 1.344313 | 1.8071763  | 22.63785 | 0.01147  | 19.48 |
| 2176   | 2015 | -0.06 | 0.08 | 1.344313 | 1.8071763  | 22.63785 | 0.01147  | 19.48 |
| 2176   | 2015 | -0.06 | 0.08 | 1.344313 | 1.8071763  | 22.63785 | 0.01147  | 19.48 |
| 300095 | 2015 | -0.17 | 0.08 | 1.344313 | 1.8071763  | 20.90044 | 0.066437 | 31.89 |
| 2176   | 2015 | -0.06 | 0.08 | 1.344313 | 1.8071763  | 22.63785 | 0.01147  | 19.48 |
| 300095 | 2015 | -0.52 | 0.08 | 1.344313 | 1.8071763  | 20.90044 | 0.066437 | 31.89 |
| 300095 | 2015 | 0.117 | 0.08 | 1.344313 | 1.8071763  | 20.90044 | 0.066437 | 31.89 |
| 300095 | 2015 | -0.17 | 0.08 | 1.344313 | 1.8071763  | 20.90044 | 0.066437 | 31.89 |
| 300095 | 2015 | -0.29 | 0.08 | 1.344313 | 1.8071763  | 20.90044 | 0.066437 | 31.89 |
| 2176   | 2015 | -0.06 | 0.08 | 1.344313 | 1.8071763  | 22.63785 | 0.01147  | 19.48 |
| 2176   | 2015 | -0.26 | 0.08 | 1.344313 | 1.8071763  | 22.22235 | 0.01147  | 19.48 |
| 2176   | 2015 | -0.06 | 0.08 | 1.344313 | 1.8071763  | 22.63785 | 0.01147  | 19.48 |
| 300095 | 2015 | -0.36 | 0.08 | 1.344313 | 1.8071763  | 20.80563 | 0.066437 | 31.89 |
| 300095 | 2015 | -0.52 | 0.08 | 1.344313 | 1.8071763  | 20.90044 | 0.066437 | 31.89 |
| 2176   | 2015 | -0.06 | 0.08 | 1.344313 | 1.8071763  | 22.63785 | 0.01147  | 19.48 |
| 2176   | 2015 | -0.06 | 0.08 | 1.344313 | 1.8071763  | 22.63785 | 0.01147  | 19.48 |
| 2226   | 2015 | -0.4  | 0.09 | 1.624167 | 2.6379169  | 22.25697 | 0.019513 | 33.23 |
| 887    | 2015 | -0.21 | 0.09 | 1.624167 | 2.6379169  | 22.73431 | 0.197313 | 49.05 |
| 887    | 2015 | -0.19 | 0.09 | 1.624167 | 2.6379169  | 22.73431 | 0.197313 | 49.05 |
| 2226   | 2015 | -0.73 | 0.09 | 1.624167 | 2.6379169  | 22.25697 | 0.019513 | 33.23 |
| 2226   | 2015 | -0.41 | 0.09 | 1.624167 | 2.6379169  | 22.25697 | 0.019513 | 33.23 |
| 2226   | 2015 | -0.4  | 0.09 | 1.624167 | 2.6379169  | 22.25697 | 0.019513 | 33.23 |
| 2226   | 2015 | -0.42 | 0.09 | 1.624167 | 2.6379169  | 22.25697 | 0.019513 | 33.23 |
| 887    | 2015 | 0.062 | 0.09 | 1.624167 | 2.6379169  | 22.73431 | 0.197313 | 49.05 |
| 2226   | 2015 | -0.06 | 0.09 | 1.624167 | 2.6379169  | 22.25697 | 0.019513 | 33.23 |
| 887    | 2015 | -0.29 | 0.09 | 1.624167 | 2.6379169  | 22.73431 | 0.197313 | 49.05 |
| 887    | 2015 | -0.29 | 0.09 | 1.624167 | 2.6379169  | 22.73431 | 0.197313 | 49.05 |
| 2226   | 2015 | -0.45 | 0.09 | 1.624167 | 2.6379169  | 22.25697 | 0.019513 | 33.23 |
| 887    | 2015 | 0.514 | 0.09 | 1.624167 | 2.6379169  | 22.73431 | 0.197313 | 49.05 |
| 2226   | 2015 | -0.41 | 0.09 | 1.624167 | 2.6379169  | 22.25697 | 0.019513 | 33.23 |
| 2226   | 2015 | -0.57 | 0.09 | 1.624167 | 2.6379169  | 22.25697 | 0.019513 | 33.23 |
| 2226   | 2015 | -0.45 | 0.09 | 1.624167 | 2.6379169  | 22.25697 | 0.019513 | 33.23 |
| 887    | 2015 | 0.106 | 0.09 | 1.624167 | 2.6379169  | 22.73431 | 0.197313 | 49.05 |
| 2226   | 2015 | -0.09 | 0.09 | 1.624167 | 2.6379169  | 22.25697 | 0.019513 | 33.23 |
| 887    | 2015 | 0.773 | 0.09 | 1.624167 | 2.6379169  | 22.73431 | 0.197313 | 49.05 |
| 2226   | 2015 | -0.41 | 0.09 | 1.624167 | 2.6379169  | 22.25697 | 0.019513 | 33.23 |
| 887    | 2015 | 0.037 | 0.09 | 1.624167 | 2.6379169  | 22.73431 | 0.197313 | 49.05 |
| 887    | 2015 | -0.29 | 0.09 | 1.624167 | 2.6379169  | 22.21995 | 0.197313 | 49.05 |
| 2226   | 2015 | -0.41 | 0.09 | 1.624167 | 2.6379169  | 22.04114 | 0.019513 | 33.23 |
| 887    | 2015 | 0.366 | 0.09 | 1.624167 | 2.6379169  | 22.73431 | 0.197313 | 49.05 |
| 887    | 2015 | -0.01 | 0.09 | 1.624167 | 2.6379169  | 22.73431 | 0.197313 | 49.05 |
| 887    | 2015 | 0.054 | 0.09 | 1.624167 | 2.6379169  | 22.73431 | 0.197313 | 49.05 |
| 2226   | 2015 | -0.28 | 0.09 | 1.624167 | 2.6379169  | 22.25697 | 0.019513 | 33.23 |
| 887    | 2015 | 0.054 | 0.09 | 1.624167 | 2.6379169  | 22.73431 | 0.197313 | 49.05 |
| 2226   | 2015 | -0.4  | 0.09 | 1.624167 | 2.6379169  | 22.25697 | 0.019513 | 33.23 |
| 887    | 2015 | 0.514 | 0.09 | 1.624167 | 2.6379169  | 22.73431 | 0.197313 | 49.05 |
| 300160 | 2015 | 0.004 | 0.09 | 0.172663 | 0.02981265 | 21.16156 | 0.053654 | 29.51 |
| 300160 | 2015 | 0.004 | 0.09 | 0.172663 | 0.02981265 | 21.16156 | 0.053654 | 29.51 |
| 2304   | 2015 | -0.68 | 0.09 | 0.172663 | 0.02981265 | 24.25537 | 0.233865 | 34.16 |
| 2304   | 2015 | -0.95 | 0.09 | 0.172663 | 0.02981265 | 24.24551 | 0.233865 | 34.16 |
| 300160 | 2015 | 0.004 | 0.09 | 0.172663 | 0.02981265 | 21.15198 | 0.053654 | 29.51 |

|        |      |       |      |          |            |          |          |       |
|--------|------|-------|------|----------|------------|----------|----------|-------|
| 2304   | 2015 | -0.5  | 0.09 | 0.172663 | 0.02981265 | 24.24551 | 0.233865 | 34.16 |
| 2304   | 2015 | -0.95 | 0.09 | 0.172663 | 0.02981265 | 24.24551 | 0.233865 | 34.16 |
| 2585   | 2015 | -0.01 | 0.09 | 0.172663 | 0.02981265 | 22.47447 | 0.02305  | 33.21 |
| 2585   | 2015 | -0.01 | 0.09 | 0.172663 | 0.02981265 | 22.48313 | 0.02305  | 33.21 |
| 2585   | 2015 | -0.01 | 0.09 | 0.172663 | 0.02981265 | 22.48313 | 0.02305  | 33.21 |
| 2585   | 2015 | -0.01 | 0.09 | 0.172663 | 0.02981265 | 22.48313 | 0.02305  | 33.21 |
| 2585   | 2015 | -0.01 | 0.09 | 0.172663 | 0.02981265 | 22.48313 | 0.02305  | 33.21 |
| 2304   | 2015 | -0.5  | 0.09 | 0.172663 | 0.02981265 | 24.24551 | 0.233865 | 34.16 |
| 908    | 2015 | 0.582 | 1.03 | 1.280934 | 1.6407915  | 21.95951 | 0.164645 | 19.49 |
| 908    | 2015 | 0.246 | 1.03 | 1.280934 | 1.6407915  | 21.95951 | 0.164645 | 19.49 |
| 819    | 2015 | 0.332 | 1.03 | 1.280934 | 1.6407915  | 20.52335 | 0.066407 | 23.46 |
| 600963 | 2015 | 0.222 | 1.03 | 1.280934 | 1.6407915  | 23.26945 | -0.07464 | 37.34 |
| 600963 | 2015 | 0.271 | 1.03 | 1.280934 | 1.6407915  | 23.26945 | -0.07464 | 37.34 |
| 300035 | 2015 | -0.33 | 1.03 | 1.280934 | 1.6407915  | 20.67915 | 0.016981 | 17.24 |
| 600963 | 2015 | 0.271 | 1.03 | 1.280934 | 1.6407915  | 23.26945 | -0.07464 | 37.34 |
| 908    | 2015 | 0.628 | 1.03 | 1.280934 | 1.6407915  | 21.95951 | 0.164645 | 19.49 |
| 2549   | 2015 | 0.572 | 1.03 | 1.280934 | 1.6407915  | 20.71331 | -0.05212 | 64.51 |
| 2549   | 2015 | 0.572 | 1.03 | 1.280934 | 1.6407915  | 20.90232 | -0.05212 | 64.51 |
| 2549   | 2015 | 0.596 | 1.03 | 1.280934 | 1.6407915  | 20.90232 | -0.05212 | 64.51 |
| 600963 | 2015 | -0.12 | 1.03 | 1.280934 | 1.6407915  | 23.26945 | -0.07464 | 37.34 |
| 908    | 2015 | 0.526 | 1.03 | 1.280934 | 1.6407915  | 22.36418 | 0.164645 | 19.49 |
| 600963 | 2015 | 0.271 | 1.03 | 1.280934 | 1.6407915  | 23.26945 | -0.07464 | 37.34 |
| 908    | 2015 | 0.284 | 1.03 | 1.280934 | 1.6407915  | 21.95951 | 0.164645 | 19.49 |
| 600963 | 2015 | 0.271 | 1.03 | 1.280934 | 1.6407915  | 23.46731 | -0.07464 | 37.34 |
| 819    | 2015 | 0.332 | 1.03 | 1.280934 | 1.6407915  | 20.52335 | 0.066407 | 23.46 |
| 908    | 2015 | 0.628 | 1.03 | 1.280934 | 1.6407915  | 21.95951 | 0.164645 | 19.49 |
| 908    | 2015 | 0.526 | 1.03 | 1.280934 | 1.6407915  | 21.95951 | 0.164645 | 19.49 |
| 600963 | 2015 | 0.271 | 1.03 | 1.280934 | 1.6407915  | 23.26945 | -0.07464 | 37.34 |
| 908    | 2015 | -0.06 | 1.03 | 1.280934 | 1.6407915  | 21.95951 | 0.164645 | 19.49 |
| 600963 | 2015 | 0.271 | 1.03 | 1.280934 | 1.6407915  | 23.26945 | -0.07464 | 37.34 |
| 819    | 2015 | 0.332 | 1.03 | 1.280934 | 1.6407915  | 20.52335 | 0.066407 | 23.46 |
| 2549   | 2015 | 0.596 | 1.03 | 1.280934 | 1.6407915  | 20.90232 | -0.05212 | 64.51 |
| 908    | 2015 | 0.591 | 1.03 | 1.280934 | 1.6407915  | 21.95951 | 0.164645 | 19.49 |
| 600963 | 2015 | 0.271 | 1.03 | 1.280934 | 1.6407915  | 23.26945 | -0.07464 | 37.34 |
| 819    | 2015 | 0.332 | 1.03 | 1.280934 | 1.6407915  | 20.52335 | 0.066407 | 23.46 |
| 908    | 2015 | -0.06 | 1.03 | 1.280934 | 1.6407915  | 21.95951 | 0.164645 | 19.49 |
| 908    | 2015 | 0.526 | 1.03 | 1.280934 | 1.6407915  | 21.95951 | 0.164645 | 19.49 |
| 600963 | 2015 | -0.12 | 1.03 | 1.280934 | 1.6407915  | 23.26945 | -0.07464 | 37.34 |
| 2549   | 2015 | 0.584 | 1.03 | 1.280934 | 1.6407915  | 20.90232 | -0.05212 | 64.51 |
| 2549   | 2015 | 0.572 | 1.03 | 1.280934 | 1.6407915  | 20.90232 | -0.05212 | 64.51 |
| 600963 | 2015 | 0.271 | 1.03 | 1.280934 | 1.6407915  | 23.26945 | -0.07464 | 37.34 |
| 300035 | 2015 | -0.33 | 1.03 | 1.280934 | 1.6407915  | 20.67915 | 0.016981 | 17.24 |
| 908    | 2015 | 0.526 | 1.03 | 1.280934 | 1.6407915  | 21.95951 | 0.164645 | 19.49 |
| 819    | 2015 | 0.332 | 1.03 | 1.280934 | 1.6407915  | 20.45654 | 0.066407 | 23.46 |
| 300035 | 2015 | -0.33 | 1.03 | 1.280934 | 1.6407915  | 20.67915 | 0.016981 | 17.24 |
| 2478   | 2015 | -0.66 | 0.09 | 1.130588 | 1.2782283  | 21.77471 | 0.072824 | 27.58 |
| 603188 | 2015 | 4E-04 | 0.09 | 1.130588 | 1.2782283  | 22.12992 | 0.211734 | 28.84 |
| 601100 | 2015 | 0.107 | 0.09 | 1.130588 | 1.2782283  | 22.27098 | 0.017296 | 42    |
| 2550   | 2015 | 0.803 | 0.09 | 1.130588 | 1.2782283  | 21.76465 | 0.114315 | 22.8  |
| 2550   | 2015 | 0.803 | 0.09 | 1.130588 | 1.2782283  | 21.75865 | 0.114315 | 22.8  |
| 300169 | 2015 | 0.189 | 0.09 | 1.130588 | 1.2782283  | 21.32258 | 0.009654 | 10.01 |
| 300190 | 2015 | -0.41 | 0.09 | 1.130588 | 1.2782283  | 21.74484 | 0.078927 | 51.94 |
| 300169 | 2015 | -0.75 | 0.09 | 1.130588 | 1.2782283  | 21.32258 | 0.009654 | 10.01 |
| 601100 | 2015 | -0.1  | 0.09 | 1.130588 | 1.2782283  | 22.16518 | 0.017296 | 42    |

|        |      |       |      |          |           |          |          |       |
|--------|------|-------|------|----------|-----------|----------|----------|-------|
| 300169 | 2015 | 0.189 | 0.09 | 1.130588 | 1.2782283 | 21.32258 | 0.009654 | 10.01 |
| 601799 | 2015 | -0.28 | 0.09 | 1.130588 | 1.2782283 | 21.94904 | 0.139512 | 42.98 |
| 300190 | 2015 | 0.118 | 0.09 | 1.130588 | 1.2782283 | 21.61584 | 0.078927 | 51.94 |
| 2413   | 2015 | 0.521 | 0.09 | 1.130588 | 1.2782283 | 21.4629  | 0.0661   | 24.96 |
| 600710 | 2015 | -0.63 | 0.09 | 1.130588 | 1.2782283 | 21.3653  | -0.4336  | 25.32 |
| 2550   | 2015 | 0.513 | 0.09 | 1.130588 | 1.2782283 | 21.76465 | 0.114315 | 22.8  |
| 2708   | 2015 | -0.23 | 0.09 | 1.130588 | 1.2782283 | 20.83266 | 0.040081 | 33.95 |
| 601100 | 2015 | -0.07 | 0.09 | 1.130588 | 1.2782283 | 22.27098 | 0.017296 | 42    |
| 601100 | 2015 | -0.15 | 0.09 | 1.130588 | 1.2782283 | 22.27098 | 0.017296 | 42    |
| 2478   | 2015 | -0.51 | 0.09 | 1.130588 | 1.2782283 | 22.09657 | 0.072824 | 27.58 |
| 300190 | 2015 | 0.118 | 0.09 | 1.130588 | 1.2782283 | 21.61584 | 0.078927 | 51.94 |
| 2516   | 2015 | -0.77 | 0.09 | 1.130588 | 1.2782283 | 22.60207 | 0.115445 | 51.79 |
| 2553   | 2015 | -0.42 | 0.09 | 1.130588 | 1.2782283 | 20.38045 | 0.099515 | 39.6  |
| 570    | 2015 | -0.22 | 0.09 | 1.130588 | 1.2782283 | 21.89649 | 0.035874 | 30.43 |
| 570    | 2015 | -0.22 | 0.09 | 1.130588 | 1.2782283 | 21.89649 | 0.035874 | 30.43 |
| 603188 | 2015 | 0.229 | 0.09 | 1.130588 | 1.2782283 | 22.12992 | 0.211734 | 28.84 |
| 300196 | 2015 | -0.5  | 0.09 | 1.130588 | 1.2782283 | 21.15047 | 0.148529 | 39.38 |
| 2708   | 2015 | -0.23 | 0.09 | 1.130588 | 1.2782283 | 20.83266 | 0.040081 | 33.95 |
| 601799 | 2015 | -0.28 | 0.09 | 1.130588 | 1.2782283 | 21.93917 | 0.139512 | 42.98 |
| 2413   | 2015 | 0.914 | 0.09 | 1.130588 | 1.2782283 | 21.57496 | 0.0661   | 24.96 |
| 603188 | 2015 | 4E-04 | 0.09 | 1.130588 | 1.2782283 | 22.12992 | 0.211734 | 28.84 |
| 2413   | 2015 | 0.717 | 0.09 | 1.130588 | 1.2782283 | 21.57496 | 0.0661   | 24.96 |
| 600510 | 2015 | -0.35 | 0.09 | 1.130588 | 1.2782283 | 23.63519 | 0.04036  | 49.92 |
| 603188 | 2015 | 4E-04 | 0.09 | 1.130588 | 1.2782283 | 21.8236  | 0.211734 | 28.84 |
| 2623   | 2015 | 0.131 | 0.09 | 1.130588 | 1.2782283 | 21.68916 | 0.025291 | 45    |
| 600510 | 2015 | -0.35 | 0.09 | 1.130588 | 1.2782283 | 23.63519 | 0.04036  | 49.92 |
| 600710 | 2015 | -0.63 | 0.09 | 1.130588 | 1.2782283 | 21.3208  | -0.4336  | 25.32 |
| 570    | 2015 | -0.51 | 0.09 | 1.130588 | 1.2782283 | 21.89649 | 0.035874 | 30.43 |
| 2623   | 2015 | 0.131 | 0.09 | 1.130588 | 1.2782283 | 21.70494 | 0.025291 | 45    |
| 2550   | 2015 | 0.503 | 0.09 | 1.130588 | 1.2782283 | 21.76465 | 0.114315 | 22.8  |
| 300029 | 2015 | 0.176 | 0.09 | 1.130588 | 1.2782283 | 20.22994 | -0.4336  | 20.05 |
| 300169 | 2015 | -0.09 | 0.09 | 1.130588 | 1.2782283 | 21.32258 | 0.009654 | 10.01 |
| 601799 | 2015 | -0.28 | 0.09 | 1.130588 | 1.2782283 | 21.94904 | 0.139512 | 42.98 |
| 601100 | 2015 | 0.132 | 0.09 | 1.130588 | 1.2782283 | 22.27098 | 0.017296 | 42    |
| 300029 | 2015 | -0.05 | 0.09 | 1.130588 | 1.2782283 | 20.22994 | -0.4336  | 20.05 |
| 600510 | 2015 | -0.35 | 0.09 | 1.130588 | 1.2782283 | 23.22673 | 0.04036  | 49.92 |
| 300196 | 2015 | -0.5  | 0.09 | 1.130588 | 1.2782283 | 21.54194 | 0.148529 | 39.38 |
| 601100 | 2015 | -0.08 | 0.09 | 1.130588 | 1.2782283 | 22.27098 | 0.017296 | 42    |
| 2623   | 2015 | 0.131 | 0.09 | 1.130588 | 1.2782283 | 21.70494 | 0.025291 | 45    |
| 300169 | 2015 | -0.06 | 0.09 | 1.130588 | 1.2782283 | 21.32258 | 0.009654 | 10.01 |
| 300196 | 2015 | -0.5  | 0.09 | 1.130588 | 1.2782283 | 21.54194 | 0.148529 | 39.38 |
| 300305 | 2015 | 0.321 | 0.09 | 1.130588 | 1.2782283 | 21.05947 | 0.061613 | 25.03 |
| 603188 | 2015 | 0.229 | 0.09 | 1.130588 | 1.2782283 | 22.12992 | 0.211734 | 28.84 |
| 2550   | 2015 | 0.525 | 0.09 | 1.130588 | 1.2782283 | 21.76465 | 0.114315 | 22.8  |
| 2478   | 2015 | 0.048 | 0.09 | 1.130588 | 1.2782283 | 22.09657 | 0.072824 | 27.58 |
| 300305 | 2015 | 0.321 | 0.09 | 1.130588 | 1.2782283 | 21.05947 | 0.061613 | 25.03 |
| 300029 | 2015 | 0.221 | 0.09 | 1.130588 | 1.2782283 | 20.22994 | -0.4336  | 20.05 |
| 300029 | 2015 | 0.221 | 0.09 | 1.130588 | 1.2782283 | 20.22994 | -0.4336  | 20.05 |
| 2413   | 2015 | 0.717 | 0.09 | 1.130588 | 1.2782283 | 21.57496 | 0.0661   | 24.96 |
| 300190 | 2015 | -0.41 | 0.09 | 1.130588 | 1.2782283 | 21.61584 | 0.078927 | 51.94 |
| 300029 | 2015 | -0.05 | 0.09 | 1.130588 | 1.2782283 | 20.22994 | -0.4336  | 20.05 |
| 300029 | 2015 | 0.221 | 0.09 | 1.130588 | 1.2782283 | 20.10336 | -0.4336  | 20.05 |
| 2413   | 2015 | 0.717 | 0.09 | 1.130588 | 1.2782283 | 21.57496 | 0.0661   | 24.96 |
| 300029 | 2015 | 0.221 | 0.09 | 1.130588 | 1.2782283 | 20.22994 | -0.4336  | 20.05 |

|        |      |       |      |          |            |          |          |       |
|--------|------|-------|------|----------|------------|----------|----------|-------|
| 2516   | 2015 | -0.77 | 0.09 | 1.130588 | 1.2782283  | 22.60207 | 0.115445 | 51.79 |
| 2478   | 2015 | -0.54 | 0.09 | 1.130588 | 1.2782283  | 22.09657 | 0.072824 | 27.58 |
| 2550   | 2015 | 0.117 | 0.09 | 1.130588 | 1.2782283  | 21.75865 | 0.114315 | 22.8  |
| 2516   | 2015 | -0.47 | 0.09 | 1.130588 | 1.2782283  | 21.80382 | 0.115445 | 51.79 |
| 2516   | 2015 | -0.63 | 0.09 | 1.130588 | 1.2782283  | 22.60207 | 0.115445 | 51.79 |
| 600710 | 2015 | -0.63 | 0.09 | 1.130588 | 1.2782283  | 21.3653  | -0.4336  | 25.32 |
| 300196 | 2015 | -0.5  | 0.09 | 1.130588 | 1.2782283  | 21.54194 | 0.148529 | 39.38 |
| 300196 | 2015 | -0.5  | 0.09 | 1.130588 | 1.2782283  | 21.54194 | 0.148529 | 39.38 |
| 300190 | 2015 | 0.029 | 0.09 | 1.130588 | 1.2782283  | 21.61584 | 0.078927 | 51.94 |
| 2550   | 2015 | 0.529 | 0.09 | 1.130588 | 1.2782283  | 21.76465 | 0.114315 | 22.8  |
| 2516   | 2015 | -0.77 | 0.09 | 1.130588 | 1.2782283  | 22.60207 | 0.115445 | 51.79 |
| 2478   | 2015 | 0.048 | 0.09 | 1.130588 | 1.2782283  | 22.09657 | 0.072824 | 27.58 |
| 2516   | 2015 | -0.77 | 0.09 | 1.130588 | 1.2782283  | 22.60207 | 0.115445 | 51.79 |
| 2478   | 2015 | -0.21 | 0.09 | 1.130588 | 1.2782283  | 22.09657 | 0.072824 | 27.58 |
| 300196 | 2015 | -0.5  | 0.09 | 1.130588 | 1.2782283  | 21.54194 | 0.148529 | 39.38 |
| 603188 | 2015 | 0.138 | 0.09 | 1.130588 | 1.2782283  | 22.12992 | 0.211734 | 28.84 |
| 300190 | 2015 | 0.118 | 0.09 | 1.130588 | 1.2782283  | 21.61584 | 0.078927 | 51.94 |
| 2708   | 2015 | -0.23 | 0.09 | 1.130588 | 1.2782283  | 20.83162 | 0.040081 | 33.95 |
| 570    | 2015 | -0.59 | 0.09 | 1.130588 | 1.2782283  | 21.89649 | 0.035874 | 30.43 |
| 600710 | 2015 | -0.63 | 0.09 | 1.130588 | 1.2782283  | 21.3653  | -0.4336  | 25.32 |
| 2553   | 2015 | -0.42 | 0.09 | 1.130588 | 1.2782283  | 20.38205 | 0.099515 | 39.6  |
| 300305 | 2015 | 0.321 | 0.09 | 1.130588 | 1.2782283  | 21.05947 | 0.061613 | 25.03 |
| 570    | 2015 | -0.59 | 0.09 | 1.130588 | 1.2782283  | 21.86178 | 0.035874 | 30.43 |
| 300169 | 2015 | -0.26 | 0.09 | 1.130588 | 1.2782283  | 21.19542 | 0.009654 | 10.01 |
| 300169 | 2015 | -0.26 | 0.09 | 1.130588 | 1.2782283  | 21.32258 | 0.009654 | 10.01 |
| 601100 | 2015 | -0.08 | 0.09 | 1.130588 | 1.2782283  | 22.27098 | 0.017296 | 42    |
| 600710 | 2015 | -0.63 | 0.09 | 1.130588 | 1.2782283  | 21.3653  | -0.4336  | 25.32 |
| 300190 | 2015 | 0.118 | 0.09 | 1.130588 | 1.2782283  | 21.61584 | 0.078927 | 51.94 |
| 2516   | 2015 | -0.67 | 0.09 | 1.130588 | 1.2782283  | 22.60207 | 0.115445 | 51.79 |
| 300190 | 2015 | 0.118 | 0.09 | 1.130588 | 1.2782283  | 21.61584 | 0.078927 | 51.94 |
| 2553   | 2015 | -0.42 | 0.09 | 1.130588 | 1.2782283  | 20.38045 | 0.099515 | 39.6  |
| 600127 | 2015 | -0.25 | 1.03 | 0.918865 | 0.84431365 | 21.13189 | -0.23004 | 22.34 |
| 600127 | 2015 | 0.191 | 1.03 | 0.918865 | 0.84431365 | 21.13189 | -0.23004 | 22.34 |
| 600127 | 2015 | -0.25 | 1.03 | 0.918865 | 0.84431365 | 21.13189 | -0.23004 | 22.34 |
| 600127 | 2015 | 0.191 | 1.03 | 0.918865 | 0.84431365 | 21.13189 | -0.23004 | 22.34 |
| 600127 | 2015 | 0.235 | 1.03 | 0.918865 | 0.84431365 | 21.13189 | -0.23004 | 22.34 |
| 600127 | 2015 | 0.235 | 1.03 | 0.918865 | 0.84431365 | 21.0328  | -0.23004 | 22.34 |
| 2045   | 2015 | -0.08 | 0.09 | 0.836248 | 0.69931053 | 21.78019 | 0.033005 | 21.88 |
| 2060   | 2015 | -0.31 | 0.09 | 0.836248 | 0.69931053 | 23.0335  | 0.041095 | 34.53 |
| 600894 | 2015 | -0.57 | 0.09 | 0.836248 | 0.69931053 | 22.95045 | 0.302158 | 56.52 |
| 600685 | 2015 | 0.221 | 0.09 | 0.836248 | 0.69931053 | 24.615   | 0.01002  | 41.66 |
| 2152   | 2015 | -0.18 | 0.09 | 0.836248 | 0.69931053 | 22.76451 | 0.192639 | 47.7  |
| 2683   | 2015 | 0.159 | 0.09 | 0.836248 | 0.69931053 | 21.80534 | 0.054445 | 24.3  |
| 2084   | 2015 | -0.49 | 0.09 | 0.836248 | 0.69931053 | 21.33293 | 0.040688 | 30.07 |
| 300177 | 2015 | 0.971 | 0.09 | 0.836248 | 0.69931053 | 21.36694 | 0.000096 | 26.77 |
| 300177 | 2015 | 1.014 | 0.09 | 0.836248 | 0.69931053 | 21.36694 | 0.000096 | 26.77 |
| 601238 | 2015 | -0.37 | 0.09 | 0.836248 | 0.69931053 | 24.93043 | 0.1016   | 60.8  |
| 2169   | 2015 | 0.131 | 0.09 | 0.836248 | 0.69931053 | 21.84201 | 0.108255 | 24.05 |
| 300310 | 2015 | 0.827 | 0.09 | 0.836248 | 0.69931053 | 20.80799 | 0.081984 | 10.88 |
| 600894 | 2015 | -0.06 | 0.09 | 0.836248 | 0.69931053 | 22.95045 | 0.302158 | 56.52 |
| 601238 | 2015 | -0.37 | 0.09 | 0.836248 | 0.69931053 | 24.93043 | 0.1016   | 60.8  |
| 2311   | 2015 | 0.122 | 0.09 | 0.836248 | 0.69931053 | 22.82553 | 0.155358 | 59.23 |
| 600143 | 2015 | 0.348 | 0.09 | 0.836248 | 0.69931053 | 23.41203 | 0.082343 | 17.76 |
| 2084   | 2015 | -0.49 | 0.09 | 0.836248 | 0.69931053 | 21.33293 | 0.040688 | 30.07 |

|        |      |       |      |          |            |          |          |       |
|--------|------|-------|------|----------|------------|----------|----------|-------|
| 300335 | 2015 | -0.38 | 0.09 | 0.836248 | 0.69931053 | 21.38498 | 0.025915 | 17.47 |
| 300310 | 2015 | 0.827 | 0.09 | 0.836248 | 0.69931053 | 20.80799 | 0.081984 | 10.88 |
| 600894 | 2015 | -0.57 | 0.09 | 0.836248 | 6.99E-01   | 22.95045 | 0.302158 | 56.52 |
| 600685 | 2015 | 0.415 | 0.09 | 0.836248 | 6.99E-01   | 24.615   | 0.01002  | 41.66 |
| 300147 | 2015 | 0.616 | 0.09 | 0.836248 | 6.99E-01   | 22.26056 | 0.056866 | 34.11 |
| 2572   | 2015 | -0.12 | 0.09 | 0.836248 | 6.99E-01   | 21.87204 | 0.186498 | 25.4  |
| 2192   | 2015 | -0.24 | 0.09 | 0.836248 | 6.99E-01   | 20.70769 | 0.020825 | 23.65 |
| 600685 | 2015 | 0.122 | 0.09 | 0.836248 | 6.99E-01   | 24.615   | 0.01002  | 41.66 |
| 2683   | 2015 | -0.42 | 0.09 | 0.836248 | 6.99E-01   | 21.80534 | 0.054445 | 24.3  |
| 2461   | 2015 | -0.31 | 0.09 | 0.836248 | 0.69931053 | 22.59275 | 0.028334 | 51.94 |
| 300219 | 2015 | 0.015 | 0.09 | 0.836248 | 0.69931053 | 21.44728 | 0.153596 | 27.41 |
| 2027   | 2015 | 0.173 | 0.09 | 0.836248 | 0.69931053 | 23.24913 | 0.302158 | 24.77 |
| 300030 | 2015 | 0.508 | 0.09 | 0.836248 | 0.69931053 | 20.99311 | 0.044367 | 23.43 |
| 2045   | 2015 | -0.26 | 0.09 | 0.836248 | 0.69931053 | 21.59046 | 0.033005 | 21.88 |
| 300219 | 2015 | -0.54 | 0.09 | 0.836248 | 0.69931053 | 21.44728 | 0.153596 | 27.41 |
| 2311   | 2015 | -0.2  | 0.09 | 0.836248 | 0.69931053 | 22.82553 | 0.155358 | 59.23 |
| 893    | 2015 | -0.98 | 0.09 | 0.836248 | 0.69931053 | 22.33584 | 0.009322 | 21.66 |
| 2045   | 2015 | 0.302 | 0.09 | 0.836248 | 0.69931053 | 21.78019 | 0.033005 | 21.88 |
| 300335 | 2015 | -0.3  | 0.09 | 0.836248 | 0.69931053 | 21.38498 | 0.025915 | 17.47 |
| 2572   | 2015 | -0.12 | 0.09 | 0.836248 | 0.69931053 | 21.87204 | 0.186498 | 25.4  |
| 2192   | 2015 | -0.24 | 0.09 | 0.836248 | 0.69931053 | 20.65042 | 0.020825 | 23.65 |
| 300098 | 2015 | 0.533 | 0.09 | 0.836248 | 0.69931053 | 22.13825 | 0.041104 | 35.78 |
| 2678   | 2015 | -0.16 | 0.09 | 0.836248 | 0.69931053 | 21.61196 | 0.075984 | 74.18 |
| 2461   | 2015 | -0.14 | 0.09 | 0.836248 | 0.69931053 | 22.59275 | 0.028334 | 51.94 |
| 601238 | 2015 | -0.37 | 0.09 | 0.836248 | 0.69931053 | 24.93043 | 0.1016   | 60.8  |
| 2461   | 2015 | -0.25 | 0.09 | 0.836248 | 0.69931053 | 22.59275 | 0.028334 | 51.94 |
| 2465   | 2015 | 0.559 | 0.09 | 0.836248 | 0.69931053 | 23.0153  | 0.094062 | 21.22 |
| 2209   | 2015 | -0.26 | 0.09 | 0.836248 | 0.69931053 | 21.19912 | 0.019357 | 30.92 |
| 2311   | 2015 | -0.2  | 0.09 | 0.836248 | 0.69931053 | 22.82553 | 0.155358 | 59.23 |
| 2169   | 2015 | 0.223 | 0.09 | 0.836248 | 0.69931053 | 21.30865 | 0.108255 | 24.05 |
| 2177   | 2015 | 0.565 | 0.09 | 0.836248 | 6.99E-01   | 21.56174 | 0.041999 | 23.61 |
| 2169   | 2015 | 0.269 | 0.09 | 0.836248 | 6.99E-01   | 21.84201 | 0.108255 | 24.05 |
| 2572   | 2015 | -0.12 | 0.09 | 0.836248 | 6.99E-01   | 21.87204 | 0.186498 | 25.4  |
| 2045   | 2015 | 0.044 | 0.09 | 0.836248 | 6.99E-01   | 21.78019 | 0.033005 | 21.88 |
| 2045   | 2015 | -0.08 | 0.09 | 0.836248 | 6.99E-01   | 21.78019 | 0.033005 | 21.88 |
| 300147 | 2015 | 0.296 | 0.09 | 0.836248 | 0.69931053 | 22.26056 | 0.056866 | 34.11 |
| 2030   | 2015 | 1.081 | 0.09 | 0.836248 | 0.69931053 | 21.83569 | 0.060706 | 16.63 |
| 2311   | 2015 | -0.2  | 0.09 | 0.836248 | 0.69931053 | 22.82553 | 0.155358 | 59.23 |
| 2045   | 2015 | 0.544 | 0.09 | 0.836248 | 0.69931053 | 21.78019 | 0.033005 | 21.88 |
| 600894 | 2015 | -0.57 | 0.09 | 0.836248 | 0.69931053 | 22.95045 | 0.302158 | 56.52 |
| 601238 | 2015 | -0.37 | 0.09 | 0.836248 | 0.69931053 | 24.93043 | 0.1016   | 60.8  |
| 600143 | 2015 | 0.643 | 0.09 | 0.836248 | 0.69931053 | 23.41203 | 0.082343 | 17.76 |
| 2400   | 2015 | -0.33 | 0.09 | 0.836248 | 0.69931053 | 22.47382 | 0.226937 | 17.39 |
| 2045   | 2015 | 0.428 | 0.09 | 0.836248 | 0.69931053 | 21.78019 | 0.033005 | 21.88 |
| 2045   | 2015 | 0.658 | 0.09 | 0.836248 | 0.69931053 | 21.78019 | 0.033005 | 21.88 |
| 2084   | 2015 | -0.39 | 0.09 | 0.836248 | 0.69931053 | 21.33293 | 0.040688 | 30.07 |
| 2060   | 2015 | -0.62 | 0.09 | 0.836248 | 0.69931053 | 23.40391 | 0.041095 | 34.53 |
| 600029 | 2015 | -0.83 | 0.09 | 0.836248 | 0.69931053 | 25.74206 | 0.100579 | 41.14 |
| 2709   | 2015 | 0.5   | 0.09 | 0.836248 | 0.69931053 | 21.20954 | 0.083446 | 41.5  |
| 523    | 2015 | 0.818 | 0.09 | 0.836248 | 0.69931053 | 21.95643 | 0.026937 | 35.23 |
| 2420   | 2015 | -0.28 | 0.09 | 0.836248 | 0.69931053 | 22.12302 | 0.0285   | 25.98 |
| 2030   | 2015 | 0.219 | 0.09 | 0.836248 | 0.69931053 | 21.83569 | 0.060706 | 16.63 |
| 300147 | 2015 | 0.616 | 0.09 | 0.836248 | 0.69931053 | 22.26056 | 0.056866 | 34.11 |
| 600685 | 2015 | 0.277 | 0.09 | 0.836248 | 0.69931053 | 24.615   | 0.01002  | 41.66 |

|        |      |       |      |          |            |          |          |       |
|--------|------|-------|------|----------|------------|----------|----------|-------|
| 600143 | 2015 | 0.209 | 0.09 | 0.836248 | 0.69931053 | 23.41203 | 0.082343 | 17.76 |
| 300335 | 2015 | -0.06 | 0.09 | 0.836248 | 0.69931053 | 21.38498 | 0.025915 | 17.47 |
| 2030   | 2015 | 1.081 | 0.09 | 0.836248 | 0.69931053 | 21.83569 | 0.060706 | 16.63 |
| 300238 | 2015 | -0.19 | 0.09 | 0.836248 | 0.69931053 | 20.50886 | 0.100669 | 29.12 |
| 2683   | 2015 | 0.675 | 0.09 | 0.836248 | 0.69931053 | 21.80534 | 0.054445 | 24.3  |
| 600685 | 2015 | -0.19 | 0.09 | 0.836248 | 0.69931053 | 23.85096 | 0.01002  | 41.66 |
| 2177   | 2015 | 0.395 | 0.09 | 0.836248 | 0.69931053 | 21.56492 | 0.041999 | 23.61 |
| 2152   | 2015 | 0.212 | 0.09 | 0.836248 | 0.69931053 | 22.76451 | 0.192639 | 47.7  |
| 2461   | 2015 | -0.34 | 0.09 | 0.836248 | 0.69931053 | 22.59275 | 0.028334 | 51.94 |
| 300335 | 2015 | -0.25 | 0.09 | 0.836248 | 0.69931053 | 21.38498 | 0.025915 | 17.47 |
| 2311   | 2015 | -0.2  | 0.09 | 0.836248 | 0.69931053 | 22.82553 | 0.155358 | 59.23 |
| 600029 | 2015 | -0.83 | 0.09 | 0.836248 | 0.69931053 | 25.71054 | 0.100579 | 41.14 |
| 2311   | 2015 | -0.2  | 0.09 | 0.836248 | 0.69931053 | 22.82553 | 0.155358 | 59.23 |
| 601238 | 2015 | -0.02 | 0.09 | 0.836248 | 0.69931053 | 24.93043 | 0.1016   | 60.8  |
| 300147 | 2015 | -0.13 | 0.09 | 0.836248 | 0.69931053 | 22.26056 | 0.056866 | 34.11 |
| 2311   | 2015 | 0.489 | 0.09 | 0.836248 | 0.69931053 | 22.82553 | 0.155358 | 59.23 |
| 603002 | 2015 | 0.127 | 0.09 | 0.836248 | 0.69931053 | 21.01908 | 0.06353  | 52.5  |
| 2420   | 2015 | -0.59 | 0.09 | 0.836248 | 0.69931053 | 22.12302 | 0.0285   | 25.98 |
| 2732   | 2015 | -0.86 | 0.09 | 0.836248 | 0.69931053 | 20.75246 | 0.11937  | 40.97 |
| 2060   | 2015 | -0.31 | 0.09 | 0.836248 | 0.69931053 | 23.0335  | 0.041095 | 34.53 |
| 2461   | 2015 | -0.27 | 0.09 | 0.836248 | 0.69931053 | 22.59275 | 0.028334 | 51.94 |
| 2311   | 2015 | 0.489 | 0.09 | 0.836248 | 0.69931053 | 22.82553 | 0.155358 | 59.23 |
| 2420   | 2015 | -0.68 | 0.09 | 0.836248 | 0.69931053 | 22.12302 | 0.0285   | 25.98 |
| 601238 | 2015 | 0.053 | 0.09 | 0.836248 | 0.69931053 | 24.93043 | 0.1016   | 60.8  |
| 2030   | 2015 | 0.852 | 0.09 | 0.836248 | 0.69931053 | 21.83569 | 0.060706 | 16.63 |
| 2663   | 2015 | -0.64 | 0.09 | 0.836248 | 0.69931053 | 22.58531 | 0.046924 | 29.13 |
| 2177   | 2015 | 0.48  | 0.09 | 0.836248 | 0.69931053 | 21.56174 | 0.041999 | 23.61 |
| 2177   | 2015 | 0.639 | 0.09 | 0.836248 | 0.69931053 | 21.56174 | 0.041999 | 23.61 |
| 2544   | 2015 | -0.37 | 0.09 | 0.836248 | 0.69931053 | 21.97972 | 0.087451 | 34.53 |
| 300238 | 2015 | -0.19 | 0.09 | 0.836248 | 0.69931053 | 20.50886 | 0.100669 | 29.12 |
| 2400   | 2015 | -0.33 | 0.09 | 0.836248 | 0.69931053 | 22.77479 | 0.226937 | 17.39 |
| 300177 | 2015 | 0.97  | 0.09 | 0.836248 | 0.69931053 | 21.1728  | 0.000096 | 26.77 |
| 300297 | 2015 | 0.668 | 0.09 | 0.836248 | 0.69931053 | 21.53715 | 0.096615 | 18.44 |
| 600029 | 2015 | -0.83 | 0.09 | 0.836248 | 0.69931053 | 25.74206 | 0.100579 | 41.14 |
| 2311   | 2015 | -0.2  | 0.09 | 0.836248 | 0.69931053 | 22.82553 | 0.155358 | 59.23 |
| 600029 | 2015 | -0.83 | 0.09 | 0.836248 | 0.69931053 | 25.74206 | 0.100579 | 41.14 |
| 601238 | 2015 | -0.37 | 0.09 | 0.836248 | 0.69931053 | 24.93043 | 0.1016   | 60.8  |
| 300177 | 2015 | 1.635 | 0.09 | 0.836248 | 0.69931053 | 21.36694 | 0.000096 | 26.77 |
| 300147 | 2015 | 0.616 | 0.09 | 0.836248 | 0.69931053 | 22.26056 | 0.056866 | 34.11 |
| 2169   | 2015 | -0.26 | 0.09 | 0.836248 | 0.69931053 | 21.84201 | 0.108255 | 24.05 |
| 2045   | 2015 | -0.44 | 0.09 | 0.836248 | 0.69931053 | 21.78019 | 0.033005 | 21.88 |
| 2169   | 2015 | 0.269 | 0.09 | 0.836248 | 0.69931053 | 21.84201 | 0.108255 | 24.05 |
| 600728 | 2015 | -0.63 | 0.09 | 0.836248 | 0.69931053 | 21.49477 | 0.119853 | 16.95 |
| 600894 | 2015 | -0.29 | 0.09 | 0.836248 | 0.69931053 | 22.95045 | 0.302158 | 56.52 |
| 2311   | 2015 | 0.146 | 0.09 | 0.836248 | 0.69931053 | 22.82553 | 0.155358 | 59.23 |
| 300147 | 2015 | 0.616 | 0.09 | 0.836248 | 0.69931053 | 22.26056 | 0.056866 | 34.11 |
| 2420   | 2015 | -0.28 | 0.09 | 0.836248 | 0.69931053 | 22.12302 | 0.0285   | 25.98 |
| 300238 | 2015 | -0.19 | 0.09 | 0.836248 | 0.69931053 | 20.50886 | 0.100669 | 29.12 |
| 2683   | 2015 | 0.675 | 0.09 | 0.836248 | 0.69931053 | 22.1679  | 0.054445 | 24.3  |
| 600685 | 2015 | -0.15 | 0.09 | 0.836248 | 0.69931053 | 24.615   | 0.01002  | 41.66 |
| 2027   | 2015 | -0.47 | 0.09 | 0.836248 | 0.69931053 | 23.24913 | 0.302158 | 24.77 |
| 600143 | 2015 | 0.094 | 0.09 | 0.836248 | 0.69931053 | 23.41203 | 0.082343 | 17.76 |
| 2177   | 2015 | 0.395 | 0.09 | 0.836248 | 0.69931053 | 21.56174 | 0.041999 | 23.61 |
| 2465   | 2015 | 0.241 | 0.09 | 0.836248 | 0.69931053 | 23.0153  | 0.094062 | 21.22 |

|        |      |       |      |          |            |          |          |       |
|--------|------|-------|------|----------|------------|----------|----------|-------|
| 300238 | 2015 | -0.19 | 0.09 | 0.836248 | 0.69931053 | 20.49787 | 0.100669 | 29.12 |
| 300297 | 2015 | 1.551 | 0.09 | 0.836248 | 0.69931053 | 21.53715 | 0.096615 | 18.44 |
| 523    | 2015 | -0.01 | 0.09 | 0.836248 | 0.69931053 | 21.95643 | 0.026937 | 35.23 |
| 300147 | 2015 | 0.217 | 0.09 | 0.836248 | 0.69931053 | 22.26056 | 0.056866 | 34.11 |
| 2027   | 2015 | -0.05 | 0.09 | 0.836248 | 0.69931053 | 23.24913 | 0.302158 | 24.77 |
| 300155 | 2015 | 0.637 | 0.09 | 0.836248 | 0.69931053 | 21.06172 | 0.030387 | 38.6  |
| 893    | 2015 | -0.98 | 0.09 | 0.836248 | 0.69931053 | 22.57191 | 0.009322 | 21.66 |
| 2152   | 2015 | 0.212 | 0.09 | 0.836248 | 0.69931053 | 22.76451 | 0.192639 | 47.7  |
| 2311   | 2015 | 0.489 | 0.09 | 0.836248 | 0.69931053 | 22.82553 | 0.155358 | 59.23 |
| 600894 | 2015 | -0.1  | 0.09 | 0.836248 | 0.69931053 | 22.95045 | 0.302158 | 56.52 |
| 300098 | 2015 | 0.533 | 0.09 | 0.836248 | 0.69931053 | 22.13825 | 0.041104 | 35.78 |
| 2152   | 2015 | -0    | 0.09 | 0.836248 | 0.69931053 | 22.76451 | 0.192639 | 47.7  |
| 2152   | 2015 | -0    | 0.09 | 0.836248 | 0.69931053 | 22.76451 | 0.192639 | 47.7  |
| 893    | 2015 | -0.98 | 0.09 | 0.836248 | 0.69931053 | 22.57191 | 0.009322 | 21.66 |
| 603002 | 2015 | 0.127 | 0.09 | 0.836248 | 0.69931053 | 21.01908 | 0.06353  | 52.5  |
| 2678   | 2015 | -0.06 | 0.09 | 0.836248 | 0.69931053 | 21.61196 | 0.075984 | 74.18 |
| 300219 | 2015 | -0.18 | 0.09 | 0.836248 | 0.69931053 | 21.44728 | 0.153596 | 27.41 |
| 300238 | 2015 | -0.06 | 0.09 | 0.836248 | 0.69931053 | 20.50886 | 0.100669 | 29.12 |
| 601238 | 2015 | -0.37 | 0.09 | 0.836248 | 0.69931053 | 24.93043 | 0.1016   | 60.8  |
| 601238 | 2015 | -0.37 | 0.09 | 0.836248 | 0.69931053 | 24.93043 | 0.1016   | 60.8  |
| 300155 | 2015 | 0.545 | 0.09 | 0.836248 | 0.69931053 | 21.03145 | 0.030387 | 38.6  |
| 300219 | 2015 | -0.32 | 0.09 | 0.836248 | 0.69931053 | 21.44728 | 0.153596 | 27.41 |
| 2311   | 2015 | -0.2  | 0.09 | 0.836248 | 0.69931053 | 22.82553 | 0.155358 | 59.23 |
| 2209   | 2015 | -0.26 | 0.09 | 0.836248 | 0.69931053 | 21.19912 | 0.019357 | 30.92 |
| 2192   | 2015 | -0.24 | 0.09 | 0.836248 | 0.69931053 | 20.65042 | 0.020825 | 23.65 |
| 300297 | 2015 | 0.668 | 0.09 | 0.836248 | 0.69931053 | 21.23807 | 0.096615 | 18.44 |
| 300310 | 2015 | 0.827 | 0.09 | 0.836248 | 0.69931053 | 20.80799 | 0.081984 | 10.88 |
| 300147 | 2015 | 0.309 | 0.09 | 0.836248 | 0.69931053 | 22.26056 | 0.056866 | 34.11 |
| 2678   | 2015 | -0.01 | 0.09 | 0.836248 | 0.69931053 | 21.61196 | 0.075984 | 74.18 |
| 601238 | 2015 | -0.37 | 0.09 | 0.836248 | 0.69931053 | 24.93043 | 0.1016   | 60.8  |
| 2420   | 2015 | -0.42 | 0.09 | 0.836248 | 0.69931053 | 22.12302 | 0.0285   | 25.98 |
| 600143 | 2015 | 0.364 | 0.09 | 0.836248 | 0.69931053 | 23.41203 | 0.082343 | 17.76 |
| 2030   | 2015 | 0.606 | 0.09 | 0.836248 | 0.69931053 | 21.83569 | 0.060706 | 16.63 |
| 600894 | 2015 | -0.41 | 0.09 | 0.836248 | 0.69931053 | 22.47498 | 0.302158 | 56.52 |
| 600143 | 2015 | 0.209 | 0.09 | 0.836248 | 0.69931053 | 23.41203 | 0.082343 | 17.76 |
| 601238 | 2015 | -0.37 | 0.09 | 0.836248 | 0.69931053 | 24.93043 | 0.1016   | 60.8  |
| 300030 | 2015 | 0.487 | 0.09 | 0.836248 | 0.69931053 | 20.99311 | 0.044367 | 23.43 |
| 2027   | 2015 | -0.47 | 0.09 | 0.836248 | 0.69931053 | 23.24913 | 0.302158 | 24.77 |
| 300335 | 2015 | -0.18 | 0.09 | 0.836248 | 0.69931053 | 21.38498 | 0.025915 | 17.47 |
| 2311   | 2015 | 0.489 | 0.09 | 0.836248 | 0.69931053 | 22.82553 | 0.155358 | 59.23 |
| 600894 | 2015 | -0.43 | 0.09 | 0.836248 | 0.69931053 | 22.95045 | 0.302158 | 56.52 |
| 300219 | 2015 | -0.25 | 0.09 | 0.836248 | 0.69931053 | 21.23664 | 0.153596 | 27.41 |
| 300310 | 2015 | 0.214 | 0.09 | 0.836248 | 0.69931053 | 20.80799 | 0.081984 | 10.88 |
| 601238 | 2015 | -0.37 | 0.09 | 0.836248 | 0.69931053 | 24.93043 | 0.1016   | 60.8  |
| 2169   | 2015 | 0.401 | 0.09 | 0.836248 | 0.69931053 | 21.84201 | 0.108255 | 24.05 |
| 601238 | 2015 | -0.37 | 0.09 | 0.836248 | 0.69931053 | 24.93043 | 0.1016   | 60.8  |
| 300219 | 2015 | -0.27 | 0.09 | 0.836248 | 0.69931053 | 21.44728 | 0.153596 | 27.41 |
| 300238 | 2015 | -0.19 | 0.09 | 0.836248 | 0.69931053 | 20.50886 | 0.100669 | 29.12 |
| 601238 | 2015 | 0.053 | 0.09 | 0.836248 | 0.69931053 | 24.93043 | 0.1016   | 60.8  |
| 600728 | 2015 | -0.28 | 0.09 | 0.836248 | 0.69931053 | 21.49477 | 0.119853 | 16.95 |
| 300030 | 2015 | -0.15 | 0.09 | 0.836248 | 0.69931053 | 20.99311 | 0.044367 | 23.43 |
| 300177 | 2015 | 0.935 | 0.09 | 0.836248 | 0.69931053 | 21.36694 | 0.000096 | 26.77 |
| 600143 | 2015 | -0.54 | 0.09 | 0.836248 | 0.69931053 | 23.41203 | 0.082343 | 17.76 |
| 300177 | 2015 | 0.575 | 0.09 | 0.836248 | 0.69931053 | 21.36694 | 0.000096 | 26.77 |



|        |      |       |      |          |            |          |          |       |
|--------|------|-------|------|----------|------------|----------|----------|-------|
| 2308   | 2015 | 0.926 | 0.09 | 0.836248 | 0.69931053 | 21.71557 | 0.054904 | 39.64 |
| 300177 | 2015 | 0.957 | 0.09 | 0.836248 | 0.69931053 | 21.36694 | 0.000096 | 26.77 |
| 601238 | 2015 | -0.37 | 0.09 | 0.836248 | 0.69931053 | 24.93043 | 0.1016   | 60.8  |
| 2311   | 2015 | 0.489 | 0.09 | 0.836248 | 0.69931053 | 22.55275 | 0.155358 | 59.23 |
| 300177 | 2015 | 1.635 | 0.09 | 0.836248 | 0.69931053 | 21.36694 | 0.000096 | 26.77 |
| 2311   | 2015 | 0.146 | 0.09 | 0.836248 | 0.69931053 | 22.82553 | 0.155358 | 59.23 |
| 2030   | 2015 | 0.076 | 0.09 | 0.836248 | 0.69931053 | 21.83569 | 0.060706 | 16.63 |
| 2030   | 2015 | 0.219 | 0.09 | 0.836248 | 0.69931053 | 21.83569 | 0.060706 | 16.63 |
| 300219 | 2015 | -0.22 | 0.09 | 0.836248 | 0.69931053 | 21.44728 | 0.153596 | 27.41 |
| 2084   | 2015 | -0.49 | 0.09 | 0.836248 | 0.69931053 | 21.33293 | 0.040688 | 30.07 |
| 600143 | 2015 | 0.209 | 0.09 | 0.836248 | 0.69931053 | 23.15378 | 0.082343 | 17.76 |
| 300310 | 2015 | 0.827 | 0.09 | 0.836248 | 0.69931053 | 20.70733 | 0.081984 | 10.88 |
| 600143 | 2015 | 0.322 | 0.09 | 0.836248 | 0.69931053 | 23.41203 | 0.082343 | 17.76 |
| 2465   | 2015 | 0.559 | 0.09 | 0.836248 | 0.69931053 | 23.0153  | 0.094062 | 21.22 |
| 600894 | 2015 | -0.18 | 0.09 | 0.836248 | 0.69931053 | 22.95045 | 0.302158 | 56.52 |
| 2308   | 2015 | 0.926 | 0.09 | 0.836248 | 0.69931053 | 21.78165 | 0.054904 | 39.64 |
| 600143 | 2015 | 0.55  | 0.09 | 0.836248 | 0.69931053 | 23.41203 | 0.082343 | 17.76 |
| 300238 | 2015 | 0.451 | 0.09 | 0.836248 | 0.69931053 | 20.50886 | 0.100669 | 29.12 |
| 300098 | 2015 | 0.533 | 0.09 | 0.836248 | 0.69931053 | 22.13825 | 0.041104 | 35.78 |
| 601238 | 2015 | 0.086 | 0.09 | 0.836248 | 0.69931053 | 24.93043 | 0.1016   | 60.8  |
| 300030 | 2015 | 0.454 | 0.09 | 0.836248 | 0.69931053 | 21.08745 | 0.044367 | 23.43 |
| 601238 | 2015 | -0.37 | 0.09 | 0.836248 | 0.69931053 | 24.93043 | 0.1016   | 60.8  |
| 601238 | 2015 | -0.37 | 0.09 | 0.836248 | 0.69931053 | 24.93043 | 0.1016   | 60.8  |
| 2420   | 2015 | -0.68 | 0.09 | 0.836248 | 0.69931053 | 22.12302 | 0.0285   | 25.98 |
| 2045   | 2015 | 0.544 | 0.09 | 0.836248 | 0.69931053 | 21.78019 | 0.033005 | 21.88 |
| 601238 | 2015 | -0.37 | 0.09 | 0.836248 | 0.69931053 | 24.93043 | 0.1016   | 60.8  |
| 2311   | 2015 | 0.232 | 0.09 | 0.836248 | 0.69931053 | 22.82553 | 0.155358 | 59.23 |
| 2683   | 2015 | -0.21 | 0.09 | 0.836248 | 0.69931053 | 21.80534 | 0.054445 | 24.3  |
| 300219 | 2015 | -0.44 | 0.09 | 0.836248 | 0.69931053 | 21.44728 | 0.153596 | 27.41 |
| 2308   | 2015 | 0.926 | 0.09 | 0.836248 | 0.69931053 | 21.78165 | 0.054904 | 39.64 |
| 300155 | 2015 | 0.602 | 0.09 | 0.836248 | 0.69931053 | 21.06172 | 0.030387 | 38.6  |
| 2152   | 2015 | 0.383 | 0.09 | 0.836248 | 0.69931053 | 22.76451 | 0.192639 | 47.7  |
| 2420   | 2015 | -0.68 | 0.09 | 0.836248 | 0.69931053 | 22.12302 | 0.0285   | 25.98 |
| 600894 | 2015 | -0.57 | 0.09 | 0.836248 | 0.69931053 | 22.95045 | 0.302158 | 56.52 |
| 601238 | 2015 | -0.37 | 0.09 | 0.836248 | 0.69931053 | 24.93043 | 0.1016   | 60.8  |
| 600143 | 2015 | 0.094 | 0.09 | 0.836248 | 0.69931053 | 23.41203 | 0.082343 | 17.76 |
| 600143 | 2015 | 0.553 | 0.09 | 0.836248 | 0.69931053 | 23.41203 | 0.082343 | 17.76 |
| 300310 | 2015 | 0.214 | 0.09 | 0.836248 | 0.69931053 | 20.80799 | 0.081984 | 10.88 |
| 2311   | 2015 | 0.032 | 0.09 | 0.836248 | 0.69931053 | 22.82553 | 0.155358 | 59.23 |
| 2465   | 2015 | 0.879 | 0.09 | 0.836248 | 0.69931053 | 23.0153  | 0.094062 | 21.22 |
| 2027   | 2015 | -0.58 | 0.09 | 0.836248 | 0.69931053 | 23.24913 | 0.302158 | 24.77 |
| 2465   | 2015 | 0.241 | 0.09 | 0.836248 | 0.69931053 | 23.0153  | 0.094062 | 21.22 |
| 300155 | 2015 | 0.376 | 0.09 | 0.836248 | 0.69931053 | 21.06172 | 0.030387 | 38.6  |
| 2030   | 2015 | 0.076 | 0.09 | 0.836248 | 0.69931053 | 21.83569 | 0.060706 | 16.63 |
| 2311   | 2015 | -0.2  | 0.09 | 0.836248 | 0.69931053 | 22.82553 | 0.155358 | 59.23 |
| 601238 | 2015 | -0.37 | 0.09 | 0.836248 | 0.69931053 | 24.93043 | 0.1016   | 60.8  |
| 2461   | 2015 | -0.42 | 0.09 | 0.836248 | 0.69931053 | 22.59275 | 0.028334 | 51.94 |
| 2683   | 2015 | 0.675 | 0.09 | 0.836248 | 0.69931053 | 21.80534 | 0.054445 | 24.3  |
| 2169   | 2015 | -0.26 | 0.09 | 0.836248 | 0.69931053 | 21.84201 | 0.108255 | 24.05 |
| 601238 | 2015 | -0.08 | 0.09 | 0.836248 | 0.69931053 | 24.93043 | 0.1016   | 60.8  |
| 601238 | 2015 | -0.37 | 0.09 | 0.836248 | 0.69931053 | 24.93043 | 0.1016   | 60.8  |
| 300177 | 2015 | 1.212 | 0.09 | 0.836248 | 0.69931053 | 21.36694 | 0.000096 | 26.77 |
| 2461   | 2015 | -0.14 | 0.09 | 0.836248 | 0.69931053 | 22.59275 | 0.028334 | 51.94 |
| 603002 | 2015 | 0.127 | 0.09 | 0.836248 | 0.69931053 | 21.01908 | 0.06353  | 52.5  |

|        |      |       |      |          |            |          |          |       |
|--------|------|-------|------|----------|------------|----------|----------|-------|
| 2544   | 2015 | 0.489 | 0.09 | 0.836248 | 0.69931053 | 21.93216 | 0.087451 | 34.53 |
| 2465   | 2015 | 0.6   | 0.09 | 0.836248 | 0.69931053 | 22.81294 | 0.094062 | 21.22 |
| 300335 | 2015 | -0.18 | 0.09 | 0.836248 | 0.69931053 | 21.38498 | 0.025915 | 17.47 |
| 2400   | 2015 | -0.33 | 0.09 | 0.836248 | 0.69931053 | 22.77479 | 0.226937 | 17.39 |
| 2209   | 2015 | -0.04 | 0.09 | 0.836248 | 0.69931053 | 21.20002 | 0.019357 | 30.92 |
| 600728 | 2015 | -0.28 | 0.09 | 0.836248 | 6.99E-01   | 21.49477 | 0.119853 | 16.95 |
| 600029 | 2015 | -0.83 | 0.09 | 0.836248 | 6.99E-01   | 25.74206 | 0.100579 | 41.14 |
| 300297 | 2015 | 1.109 | 0.09 | 0.836248 | 6.99E-01   | 21.53715 | 0.096615 | 18.44 |
| 2709   | 2015 | -0.06 | 0.09 | 0.836248 | 6.99E-01   | 21.20954 | 0.083446 | 41.5  |
| 2465   | 2015 | 0.241 | 0.09 | 0.836248 | 6.99E-01   | 23.0153  | 0.094062 | 21.22 |
| 2420   | 2015 | -0.68 | 0.09 | 0.836248 | 0.69931053 | 22.00936 | 0.0285   | 25.98 |
| 300147 | 2015 | 0.47  | 0.09 | 0.836248 | 0.69931053 | 22.10988 | 0.056866 | 34.11 |
| 2656   | 2015 | -0.54 | 0.09 | 0.836248 | 0.69931053 | 21.74786 | -0.00607 | 39.75 |
| 2420   | 2015 | -0.68 | 0.09 | 0.836248 | 0.69931053 | 22.12302 | 0.0285   | 25.98 |
| 300098 | 2015 | 0.533 | 0.09 | 0.836248 | 0.69931053 | 22.18081 | 0.041104 | 35.78 |
| 2683   | 2015 | -0.42 | 0.09 | 0.836248 | 0.69931053 | 21.80534 | 0.054445 | 24.3  |
| 2311   | 2015 | -0.2  | 0.09 | 0.836248 | 0.69931053 | 22.82553 | 0.155358 | 59.23 |
| 300030 | 2015 | 0.508 | 0.09 | 0.836248 | 0.69931053 | 20.99311 | 0.044367 | 23.43 |
| 2084   | 2015 | -0.39 | 0.09 | 0.836248 | 0.69931053 | 21.33293 | 0.040688 | 30.07 |
| 2169   | 2015 | 0.234 | 0.09 | 0.836248 | 0.69931053 | 21.84201 | 0.108255 | 24.05 |
| 2420   | 2015 | -0.65 | 0.09 | 0.836248 | 0.69931053 | 22.12302 | 0.0285   | 25.98 |
| 300030 | 2015 | 0.275 | 0.09 | 0.836248 | 0.69931053 | 20.99311 | 0.044367 | 23.43 |
| 2027   | 2015 | -0.58 | 0.09 | 0.836248 | 0.69931053 | 24.56997 | 0.302158 | 24.77 |
| 600143 | 2015 | 0.209 | 0.09 | 0.836248 | 0.69931053 | 23.41203 | 0.082343 | 17.76 |
| 300155 | 2015 | 0.616 | 0.09 | 0.836248 | 0.69931053 | 21.06172 | 0.030387 | 38.6  |
| 601238 | 2015 | -0.16 | 0.09 | 0.836248 | 0.69931053 | 24.93043 | 0.1016   | 60.8  |
| 600685 | 2015 | -0.14 | 0.09 | 0.836248 | 0.69931053 | 24.615   | 0.01002  | 41.66 |
| 601238 | 2015 | 0.1   | 0.09 | 0.836248 | 0.69931053 | 24.76838 | 0.1016   | 60.8  |
| 2461   | 2015 | -0.34 | 0.09 | 0.836248 | 0.69931053 | 22.44386 | 0.028334 | 51.94 |
| 600728 | 2015 | -0.63 | 0.09 | 0.836248 | 0.69931053 | 21.49477 | 0.119853 | 16.95 |
| 2663   | 2015 | -0.64 | 0.09 | 0.836248 | 0.69931053 | 22.54168 | 0.046924 | 29.13 |
| 2683   | 2015 | -0.04 | 0.09 | 0.836248 | 0.69931053 | 21.80534 | 0.054445 | 24.3  |
| 601238 | 2015 | -0.37 | 0.09 | 0.836248 | 0.69931053 | 24.93043 | 0.1016   | 60.8  |
| 2311   | 2015 | -0.2  | 0.09 | 0.836248 | 0.69931053 | 22.82553 | 0.155358 | 59.23 |
| 601238 | 2015 | -0.04 | 0.09 | 0.836248 | 0.69931053 | 24.93043 | 0.1016   | 60.8  |
| 2060   | 2015 | -0.28 | 0.09 | 0.836248 | 0.69931053 | 23.0335  | 0.041095 | 34.53 |
| 2656   | 2015 | -0.58 | 0.09 | 0.836248 | 0.69931053 | 21.43174 | -0.00607 | 39.75 |
| 2465   | 2015 | 0.559 | 0.09 | 0.836248 | 0.69931053 | 23.0153  | 0.094062 | 21.22 |
| 2732   | 2015 | -0.86 | 0.09 | 0.836248 | 0.69931053 | 20.75246 | 0.11937  | 40.97 |
| 2465   | 2015 | 1.229 | 0.09 | 0.836248 | 0.69931053 | 23.0153  | 0.094062 | 21.22 |
| 2465   | 2015 | 0.559 | 0.09 | 0.836248 | 0.69931053 | 23.0153  | 0.094062 | 21.22 |
| 2027   | 2015 | 0.414 | 0.09 | 0.836248 | 0.69931053 | 23.24913 | 0.302158 | 24.77 |
| 2709   | 2015 | 0.385 | 0.09 | 0.836248 | 0.69931053 | 21.07094 | 0.083446 | 41.5  |
| 2027   | 2015 | -0.58 | 0.09 | 0.836248 | 0.69931053 | 23.24913 | 0.302158 | 24.77 |
| 2544   | 2015 | -0.37 | 0.09 | 0.836248 | 0.69931053 | 21.97972 | 0.087451 | 34.53 |
| 2192   | 2015 | -0.24 | 0.09 | 0.836248 | 0.69931053 | 20.65042 | 0.020825 | 23.65 |
| 2311   | 2015 | -0.2  | 0.09 | 0.836248 | 0.69931053 | 22.82553 | 0.155358 | 59.23 |
| 2311   | 2015 | -0.2  | 0.09 | 0.836248 | 0.69931053 | 22.82553 | 0.155358 | 59.23 |
| 2683   | 2015 | -0.07 | 0.09 | 0.836248 | 0.69931053 | 21.80534 | 0.054445 | 24.3  |
| 600029 | 2015 | -0.83 | 0.09 | 0.836248 | 0.69931053 | 25.74206 | 0.100579 | 41.14 |
| 2311   | 2015 | 0.489 | 0.09 | 0.836248 | 0.69931053 | 22.82553 | 0.155358 | 59.23 |
| 601238 | 2015 | -0.37 | 0.09 | 0.836248 | 0.69931053 | 24.93043 | 0.1016   | 60.8  |
| 300030 | 2015 | -0.15 | 0.09 | 0.836248 | 0.69931053 | 20.99311 | 0.044367 | 23.43 |
| 600143 | 2015 | 0.049 | 0.09 | 0.836248 | 0.69931053 | 23.41203 | 0.082343 | 17.76 |

|        |      |       |      |          |            |          |          |       |
|--------|------|-------|------|----------|------------|----------|----------|-------|
| 2572   | 2015 | -0.12 | 0.09 | 0.836248 | 0.69931053 | 21.87204 | 0.186498 | 25.4  |
| 600143 | 2015 | 0.322 | 0.09 | 0.836248 | 0.69931053 | 23.41203 | 0.082343 | 17.76 |
| 600685 | 2015 | 0.12  | 0.09 | 0.836248 | 0.69931053 | 24.615   | 0.01002  | 41.66 |
| 2027   | 2015 | -0.58 | 0.09 | 0.836248 | 0.69931053 | 23.24913 | 0.302158 | 24.77 |
| 2152   | 2015 | -0    | 0.09 | 0.836248 | 0.69931053 | 22.63642 | 0.192639 | 47.7  |
| 2045   | 2015 | 0.887 | 0.09 | 0.836248 | 0.69931053 | 21.78019 | 0.033005 | 21.88 |
| 300219 | 2015 | -0.54 | 0.09 | 0.836248 | 0.69931053 | 21.44728 | 0.153596 | 27.41 |
| 2709   | 2015 | 0.399 | 0.09 | 0.836248 | 0.69931053 | 21.20954 | 0.083446 | 41.5  |
| 300297 | 2015 | 1.551 | 0.09 | 0.836248 | 0.69931053 | 21.53715 | 0.096615 | 18.44 |
| 300030 | 2015 | 0.275 | 0.09 | 0.836248 | 0.69931053 | 20.99311 | 0.044367 | 23.43 |
| 603002 | 2015 | 0.127 | 0.09 | 0.836248 | 0.69931053 | 21.01908 | 0.06353  | 52.5  |
| 601238 | 2015 | -0.19 | 0.09 | 0.836248 | 0.69931053 | 24.93043 | 0.1016   | 60.8  |
| 2678   | 2015 | -0.01 | 0.09 | 0.836248 | 0.69931053 | 21.61196 | 0.075984 | 74.18 |
| 2060   | 2015 | -0.35 | 0.09 | 0.836248 | 0.69931053 | 23.0335  | 0.041095 | 34.53 |
| 2683   | 2015 | -0.42 | 0.09 | 0.836248 | 0.69931053 | 21.80534 | 0.054445 | 24.3  |
| 2311   | 2015 | -0.2  | 0.09 | 0.836248 | 0.69931053 | 22.82553 | 0.155358 | 59.23 |
| 2465   | 2015 | 0.559 | 0.09 | 0.836248 | 0.69931053 | 23.0153  | 0.094062 | 21.22 |
| 300155 | 2015 | 0.637 | 0.09 | 0.836248 | 0.69931053 | 21.06172 | 0.030387 | 38.6  |
| 600685 | 2015 | -0.14 | 0.09 | 0.836248 | 0.69931053 | 24.615   | 0.01002  | 41.66 |
| 2663   | 2015 | -0.64 | 0.09 | 0.836248 | 0.69931053 | 22.58531 | 0.046924 | 29.13 |
| 300310 | 2015 | -0.09 | 0.09 | 0.836248 | 0.69931053 | 20.80799 | 0.081984 | 10.88 |
| 2030   | 2015 | -0.08 | 0.09 | 0.836248 | 0.69931053 | 21.83569 | 0.060706 | 16.63 |
| 2311   | 2015 | -0.2  | 0.09 | 0.836248 | 0.69931053 | 22.82553 | 0.155358 | 59.23 |
| 300177 | 2015 | 0.895 | 0.09 | 0.836248 | 0.69931053 | 21.36694 | 0.000096 | 26.77 |
| 2572   | 2015 | -0.12 | 0.09 | 0.836248 | 0.69931053 | 21.61079 | 0.186498 | 25.4  |
| 2732   | 2015 | -0.86 | 0.09 | 0.836248 | 0.69931053 | 20.7019  | 0.11937  | 40.97 |
| 600894 | 2015 | -0.57 | 0.09 | 0.836248 | 0.69931053 | 22.95045 | 0.302158 | 56.52 |
| 300219 | 2015 | -0.18 | 0.09 | 0.836248 | 0.69931053 | 21.44728 | 0.153596 | 27.41 |
| 2709   | 2015 | 0.452 | 0.09 | 0.836248 | 0.69931053 | 21.20954 | 0.083446 | 41.5  |
| 2060   | 2015 | -0.3  | 0.09 | 0.836248 | 0.69931053 | 23.0335  | 0.041095 | 34.53 |
| 2709   | 2015 | 0.346 | 0.09 | 0.836248 | 0.69931053 | 21.20954 | 0.083446 | 41.5  |
| 2572   | 2015 | -0.12 | 0.09 | 0.836248 | 0.69931053 | 21.87204 | 0.186498 | 25.4  |
| 300030 | 2015 | 1.174 | 0.09 | 0.836248 | 0.69931053 | 20.99311 | 0.044367 | 23.43 |
| 2465   | 2015 | 0.241 | 0.09 | 0.836248 | 0.69931053 | 23.0153  | 0.094062 | 21.22 |
| 2465   | 2015 | 0.578 | 0.09 | 0.836248 | 0.69931053 | 23.0153  | 0.094062 | 21.22 |
| 2192   | 2015 | -0.24 | 0.09 | 0.836248 | 0.69931053 | 20.65042 | 0.020825 | 23.65 |
| 601238 | 2015 | -0.37 | 0.09 | 0.836248 | 0.69931053 | 24.93043 | 0.1016   | 60.8  |
| 2709   | 2015 | 0.414 | 0.09 | 0.836248 | 0.69931053 | 21.07094 | 0.083446 | 41.5  |
| 861    | 2015 | 0.357 | 0.09 | 0.836248 | 0.69931053 | 22.61332 | 0.071249 | 48.17 |
| 2030   | 2015 | 0.182 | 0.09 | 0.836248 | 0.69931053 | 21.83569 | 0.060706 | 16.63 |
| 601238 | 2015 | -0.37 | 0.09 | 0.836248 | 0.69931053 | 24.93043 | 0.1016   | 60.8  |
| 2420   | 2015 | -0.68 | 0.09 | 0.836248 | 0.69931053 | 22.12302 | 0.0285   | 25.98 |
| 300238 | 2015 | 0.026 | 0.09 | 0.836248 | 0.69931053 | 20.50886 | 0.100669 | 29.12 |
| 600728 | 2015 | -0.63 | 0.09 | 0.836248 | 0.69931053 | 21.49477 | 0.119853 | 16.95 |
| 2465   | 2015 | 0.559 | 0.09 | 0.836248 | 0.69931053 | 23.0153  | 0.094062 | 21.22 |
| 600728 | 2015 | -0.14 | 0.09 | 0.836248 | 0.69931053 | 21.98423 | 0.119853 | 16.95 |
| 523    | 2015 | -0.2  | 0.09 | 0.836248 | 0.69931053 | 21.95643 | 0.026937 | 35.23 |
| 300335 | 2015 | -0.31 | 0.09 | 0.836248 | 0.69931053 | 21.38498 | 0.025915 | 17.47 |
| 300030 | 2015 | 0.349 | 0.09 | 0.836248 | 0.69931053 | 20.99311 | 0.044367 | 23.43 |
| 2030   | 2015 | 0.848 | 0.09 | 0.836248 | 0.69931053 | 21.83569 | 0.060706 | 16.63 |
| 893    | 2015 | -0.98 | 0.09 | 0.836248 | 0.69931053 | 22.57191 | 0.009322 | 21.66 |
| 300297 | 2015 | 0.668 | 0.09 | 0.836248 | 0.69931053 | 21.53715 | 0.096615 | 18.44 |
| 2152   | 2015 | 0.898 | 0.09 | 0.836248 | 0.69931053 | 22.76451 | 0.192639 | 47.7  |
| 2030   | 2015 | 0.219 | 0.09 | 0.836248 | 0.69931053 | 21.83569 | 0.060706 | 16.63 |

|        |      |       |      |          |            |          |          |       |
|--------|------|-------|------|----------|------------|----------|----------|-------|
| 861    | 2015 | 0.357 | 0.09 | 0.836248 | 0.69931053 | 22.76869 | 0.071249 | 48.17 |
| 2678   | 2015 | 0.021 | 0.09 | 0.836248 | 0.69931053 | 21.61196 | 0.075984 | 74.18 |
| 2311   | 2015 | -0.2  | 0.09 | 0.836248 | 0.69931053 | 22.82553 | 0.155358 | 59.23 |
| 600894 | 2015 | -0.26 | 0.09 | 0.836248 | 0.69931053 | 22.95045 | 0.302158 | 56.52 |
| 300310 | 2015 | 0.827 | 0.09 | 0.836248 | 0.69931053 | 20.80799 | 0.081984 | 10.88 |
| 2192   | 2015 | -0.24 | 0.09 | 0.836248 | 0.69931053 | 20.65042 | 0.020825 | 23.65 |
| 2465   | 2015 | 0.879 | 0.09 | 0.836248 | 0.69931053 | 23.0153  | 0.094062 | 21.22 |
| 2663   | 2015 | -0.64 | 0.09 | 0.836248 | 0.69931053 | 22.58531 | 0.046924 | 29.13 |
| 601238 | 2015 | -0.37 | 0.09 | 0.836248 | 0.69931053 | 24.93043 | 0.1016   | 60.8  |
| 2209   | 2015 | -0.06 | 0.09 | 0.836248 | 0.69931053 | 21.20002 | 0.019357 | 30.92 |
| 2311   | 2015 | 0.489 | 0.09 | 0.836248 | 0.69931053 | 22.82553 | 0.155358 | 59.23 |
| 2084   | 2015 | -0.39 | 0.09 | 0.836248 | 0.69931053 | 21.19266 | 0.040688 | 30.07 |
| 2311   | 2015 | 0.489 | 0.09 | 0.836248 | 0.69931053 | 22.82553 | 0.155358 | 59.23 |
| 2311   | 2015 | -0.06 | 0.09 | 0.836248 | 0.69931053 | 22.82553 | 0.155358 | 59.23 |
| 2663   | 2015 | -0.64 | 0.09 | 0.836248 | 0.69931053 | 22.58531 | 0.046924 | 29.13 |
| 2544   | 2015 | 0.481 | 0.09 | 0.836248 | 0.69931053 | 21.97972 | 0.087451 | 34.53 |
| 300155 | 2015 | 0.376 | 0.09 | 0.836248 | 0.69931053 | 21.06172 | 0.030387 | 38.6  |
| 2544   | 2015 | 0.489 | 0.09 | 0.836248 | 0.69931053 | 21.97972 | 0.087451 | 34.53 |
| 523    | 2015 | -0.2  | 0.09 | 0.836248 | 0.69931053 | 21.98455 | 0.026937 | 35.23 |
| 300177 | 2015 | 1.014 | 0.09 | 0.836248 | 0.69931053 | 21.36694 | 0.000096 | 26.77 |
| 300147 | 2015 | 0.616 | 0.09 | 0.836248 | 0.69931053 | 22.26056 | 0.056866 | 34.11 |
| 2420   | 2015 | -0.68 | 0.09 | 0.836248 | 0.69931053 | 22.12302 | 0.0285   | 25.98 |
| 600029 | 2015 | -0.83 | 0.09 | 0.836248 | 0.69931053 | 25.74206 | 0.100579 | 41.14 |
| 2420   | 2015 | -0.68 | 0.09 | 0.836248 | 0.69931053 | 22.12302 | 0.0285   | 25.98 |
| 600029 | 2015 | -0.83 | 0.09 | 0.836248 | 0.69931053 | 25.74206 | 0.100579 | 41.14 |
| 2192   | 2015 | -0.24 | 0.09 | 0.836248 | 0.69931053 | 20.65042 | 0.020825 | 23.65 |
| 300297 | 2015 | 0.668 | 0.09 | 0.836248 | 0.69931053 | 21.53715 | 0.096615 | 18.44 |
| 601238 | 2015 | -0.31 | 0.09 | 0.836248 | 0.69931053 | 24.93043 | 0.1016   | 60.8  |
| 2465   | 2015 | 0.879 | 0.09 | 0.836248 | 0.69931053 | 23.0153  | 0.094062 | 21.22 |
| 2177   | 2015 | 0.48  | 0.09 | 0.836248 | 0.69931053 | 21.56174 | 0.041999 | 23.61 |
| 2152   | 2015 | -0    | 0.09 | 0.836248 | 0.69931053 | 22.76451 | 0.192639 | 47.7  |
| 2465   | 2015 | 0.559 | 0.09 | 0.836248 | 0.69931053 | 23.0153  | 0.094062 | 21.22 |
| 523    | 2015 | 0.818 | 0.09 | 0.836248 | 0.69931053 | 21.95643 | 0.026937 | 35.23 |
| 600728 | 2015 | -0.63 | 0.09 | 0.836248 | 0.69931053 | 21.49477 | 0.119853 | 16.95 |
| 2209   | 2015 | -0.04 | 0.09 | 0.836248 | 0.69931053 | 21.19912 | 0.019357 | 30.92 |
| 2311   | 2015 | 0.07  | 0.09 | 0.836248 | 0.69931053 | 22.82553 | 0.155358 | 59.23 |
| 300147 | 2015 | 0.616 | 0.09 | 0.836248 | 0.69931053 | 22.26056 | 0.056866 | 34.11 |
| 2709   | 2015 | -0.06 | 0.09 | 0.836248 | 0.69931053 | 21.20954 | 0.083446 | 41.5  |
| 2084   | 2015 | -0.49 | 0.09 | 0.836248 | 0.69931053 | 21.33293 | 0.040688 | 30.07 |
| 300177 | 2015 | 1.635 | 0.09 | 0.836248 | 0.69931053 | 21.36694 | 0.000096 | 26.77 |
| 2678   | 2015 | -0.21 | 0.09 | 0.836248 | 0.69931053 | 21.61196 | 0.075984 | 74.18 |
| 2656   | 2015 | -0.54 | 0.09 | 0.836248 | 0.69931053 | 21.74786 | -0.00607 | 39.75 |
| 2030   | 2015 | 0.636 | 0.09 | 0.836248 | 0.69931053 | 21.83569 | 0.060706 | 16.63 |
| 2027   | 2015 | -0.58 | 0.09 | 0.836248 | 0.69931053 | 23.24913 | 0.302158 | 24.77 |
| 2030   | 2015 | -0.08 | 0.09 | 0.836248 | 0.69931053 | 21.1835  | 0.060706 | 16.63 |
| 2420   | 2015 | -0.68 | 0.09 | 0.836248 | 0.69931053 | 22.12302 | 0.0285   | 25.98 |
| 2420   | 2015 | -0.68 | 0.09 | 0.836248 | 0.69931053 | 22.12302 | 0.0285   | 25.98 |
| 300147 | 2015 | 0.616 | 0.09 | 0.836248 | 0.69931053 | 22.26056 | 0.056866 | 34.11 |
| 2709   | 2015 | 0.399 | 0.09 | 0.836248 | 0.69931053 | 21.07094 | 0.083446 | 41.5  |
| 2656   | 2015 | -0.19 | 0.09 | 0.836248 | 0.69931053 | 21.74786 | -0.00607 | 39.75 |
| 2709   | 2015 | 0.601 | 0.09 | 0.836248 | 0.69931053 | 21.20954 | 0.083446 | 41.5  |
| 2311   | 2015 | -0.2  | 0.09 | 0.836248 | 0.69931053 | 22.82553 | 0.155358 | 59.23 |
| 2027   | 2015 | 0.024 | 0.09 | 0.836248 | 0.69931053 | 23.24913 | 0.302158 | 24.77 |
| 2420   | 2015 | -0.68 | 0.09 | 0.836248 | 0.69931053 | 22.12302 | 0.0285   | 25.98 |

|        |      |       |      |          |            |          |          |       |
|--------|------|-------|------|----------|------------|----------|----------|-------|
| 600685 | 2015 | 0.235 | 0.09 | 0.836248 | 0.69931053 | 24.615   | 0.01002  | 41.66 |
| 2311   | 2015 | -0.2  | 0.09 | 0.836248 | 0.69931053 | 22.82553 | 0.155358 | 59.23 |
| 300335 | 2015 | -0.31 | 0.09 | 0.836248 | 0.69931053 | 21.32565 | 0.025915 | 17.47 |
| 2084   | 2015 | -0.18 | 0.09 | 0.836248 | 0.69931053 | 21.33293 | 0.040688 | 30.07 |
| 2420   | 2015 | -0.68 | 0.09 | 0.836248 | 0.69931053 | 22.12302 | 0.0285   | 25.98 |
| 2169   | 2015 | 0.622 | 0.09 | 0.836248 | 0.69931053 | 21.84201 | 0.108255 | 24.05 |
| 601238 | 2015 | 0.66  | 0.09 | 0.836248 | 0.69931053 | 24.93043 | 0.1016   | 60.8  |
| 603002 | 2015 | 0.127 | 0.09 | 0.836248 | 0.69931053 | 20.98229 | 0.06353  | 52.5  |
| 2683   | 2015 | -0.08 | 0.09 | 0.836248 | 0.69931053 | 21.80534 | 0.054445 | 24.3  |
| 2060   | 2015 | 0.023 | 0.09 | 0.836248 | 0.69931053 | 23.0335  | 0.041095 | 34.53 |
| 861    | 2015 | 0.357 | 0.09 | 0.836248 | 0.69931053 | 22.61332 | 0.071249 | 48.17 |
| 2030   | 2015 | 0.519 | 0.09 | 0.836248 | 0.69931053 | 21.83569 | 0.060706 | 16.63 |
| 2663   | 2015 | -0.64 | 0.09 | 0.836248 | 0.69931053 | 22.58531 | 0.046924 | 29.13 |
| 300219 | 2015 | -0.4  | 0.09 | 0.836248 | 0.69931053 | 21.44728 | 0.153596 | 27.41 |
| 2084   | 2015 | 0.143 | 0.09 | 0.836248 | 0.69931053 | 21.33293 | 0.040688 | 30.07 |
| 2311   | 2015 | -0.2  | 0.09 | 0.836248 | 0.69931053 | 22.82553 | 0.155358 | 59.23 |
| 2177   | 2015 | 0.604 | 0.09 | 0.836248 | 0.69931053 | 21.56174 | 0.041999 | 23.61 |
| 600685 | 2015 | 0.237 | 0.09 | 0.836248 | 0.69931053 | 24.615   | 0.01002  | 41.66 |
| 2030   | 2015 | 0.738 | 0.09 | 0.836248 | 0.69931053 | 21.83569 | 0.060706 | 16.63 |
| 600143 | 2015 | 0.156 | 0.09 | 0.836248 | 0.69931053 | 23.41203 | 0.082343 | 17.76 |
| 2152   | 2015 | -0.43 | 0.09 | 0.836248 | 0.69931053 | 22.76451 | 0.192639 | 47.7  |
| 2169   | 2015 | 0.18  | 0.09 | 0.836248 | 0.69931053 | 21.84201 | 0.108255 | 24.05 |
| 2678   | 2015 | -0.21 | 0.09 | 0.836248 | 0.69931053 | 21.62513 | 0.075984 | 74.18 |
| 2411   | 2015 | 0.09  | 0.04 | 0.024382 | 0.0005945  | 22.8566  | 0.1086   | 46.4  |
| 2411   | 2015 | 0.474 | 0.04 | 0.024382 | 0.0005945  | 22.90159 | 0.1086   | 46.4  |
| 2411   | 2015 | 0.155 | 0.04 | 0.024382 | 0.0005945  | 22.90159 | 0.1086   | 46.4  |
| 2411   | 2015 | 0.703 | 0.04 | 0.024382 | 0.0005945  | 22.90159 | 0.1086   | 46.4  |
| 2411   | 2015 | 0.06  | 0.04 | 0.024382 | 0.0005945  | 22.90159 | 0.1086   | 46.4  |
| 2411   | 2015 | 0.017 | 0.04 | 0.024382 | 0.0005945  | 22.90159 | 0.1086   | 46.4  |
| 2411   | 2015 | 0.017 | 0.04 | 0.024382 | 0.0005945  | 22.90159 | 0.1086   | 46.4  |
| 2411   | 2015 | -0.11 | 0.04 | 0.024382 | 0.0005945  | 22.90159 | 0.1086   | 46.4  |
| 2411   | 2015 | -0.62 | 0.04 | 0.024382 | 0.0005945  | 22.90159 | 0.1086   | 46.4  |
| 2411   | 2015 | -0.09 | 0.04 | 0.024382 | 0.0005945  | 22.90159 | 0.1086   | 46.4  |
| 923    | 2015 | -0.76 | 0.02 | 1.337301 | 1.7883741  | 21.10225 | 0.001656 | 35.54 |
| 923    | 2015 | -0.76 | 0.02 | 1.337301 | 1.7883741  | 21.10225 | 0.001656 | 35.54 |
| 923    | 2015 | -0.76 | 0.02 | 1.337301 | 1.7883741  | 21.10225 | 0.001656 | 35.54 |
| 300092 | 2015 | -0.57 | 0.04 | 1.433718 | 2.055547   | 20.32723 | -0.108   | 19.69 |
| 510    | 2015 | -0.14 | 0.04 | 1.433718 | 2.055547   | 21.15669 | 0.008214 | 10    |
| 510    | 2015 | -0.8  | 0.04 | 1.433718 | 2.055547   | 21.15669 | 0.008214 | 10    |
| 510    | 2015 | -0.8  | 0.04 | 1.433718 | 2.055547   | 21.15669 | 0.008214 | 10    |
| 510    | 2015 | -0.14 | 0.04 | 1.433718 | 2.055547   | 21.15669 | 0.008214 | 10    |
| 510    | 2015 | -0.02 | 0.04 | 1.433718 | 2.055547   | 21.15669 | 0.008214 | 10    |
| 510    | 2015 | -0.14 | 0.04 | 1.433718 | 2.055547   | 21.15669 | 0.008214 | 10    |
| 600331 | 2015 | -0.29 | 0.04 | 1.433718 | 2.055547   | 23.04919 | 0.008202 | 26.69 |
| 600331 | 2015 | -0.29 | 0.04 | 1.433718 | 2.055547   | 22.7146  | 0.008202 | 26.69 |
| 600331 | 2015 | -0.29 | 0.04 | 1.433718 | 2.055547   | 23.04919 | 0.008202 | 26.69 |
| 600331 | 2015 | -0.29 | 0.04 | 1.433718 | 2.055547   | 23.04919 | 0.008202 | 26.69 |
| 300092 | 2015 | -0.57 | 0.04 | 1.433718 | 2.055547   | 20.24759 | -0.108   | 19.69 |
| 510    | 2015 | -0.02 | 0.04 | 1.433718 | 2.055547   | 21.15669 | 0.008214 | 10    |
| 300092 | 2015 | -0.57 | 0.04 | 1.433718 | 2.055547   | 20.32723 | -0.108   | 19.69 |
| 600331 | 2015 | -0.29 | 0.04 | 1.433718 | 2.055547   | 23.04919 | 0.008202 | 26.69 |
| 510    | 2015 | -0.14 | 0.04 | 1.433718 | 2.055547   | 20.87641 | 0.008214 | 10    |
| 510    | 2015 | -0.14 | 0.04 | 1.433718 | 2.055547   | 21.15669 | 0.008214 | 10    |
| 600331 | 2015 | -0.29 | 0.04 | 1.433718 | 2.055547   | 23.04919 | 0.008202 | 26.69 |

|        |      |       |      |          |            |          |          |       |
|--------|------|-------|------|----------|------------|----------|----------|-------|
| 2360   | 2015 | 0.599 | 0    | 1.106815 | 1.2250399  | 20.98741 | 0.080641 | 23.09 |
| 2360   | 2015 | 0.599 | 0    | 1.106815 | 1.2250399  | 20.87531 | 0.080641 | 23.09 |
| 2360   | 2015 | 0.599 | 0    | 1.106815 | 1.2250399  | 20.98741 | 0.080641 | 23.09 |
| 2360   | 2015 | 0.599 | 0    | 1.106815 | 1.2250399  | 20.98741 | 0.080641 | 23.09 |
| 2360   | 2015 | 0.599 | 0    | 1.106815 | 1.2250399  | 20.98741 | 0.080641 | 23.09 |
| 2155   | 2015 | -0.69 | 1.03 | 0.983238 | 0.9667579  | 22.47152 | 0.005448 | 42.39 |
| 2155   | 2015 | -0.69 | 1.03 | 0.983238 | 0.9667579  | 22.23399 | 0.005448 | 42.39 |
| 2155   | 2015 | -0.69 | 1.03 | 0.983238 | 0.9667579  | 22.47152 | 0.005448 | 42.39 |
| 2155   | 2015 | -0.69 | 1.03 | 0.983238 | 0.9667579  | 22.47152 | 0.005448 | 42.39 |
| 2155   | 2015 | -0.48 | 1.03 | 0.983238 | 0.9667579  | 22.47152 | 0.005448 | 42.39 |
| 2155   | 2015 | -0.48 | 1.03 | 0.983238 | 0.9667579  | 22.47152 | 0.005448 | 42.39 |
| 2155   | 2015 | -0.34 | 1.03 | 0.983238 | 0.9667579  | 22.47152 | 0.005448 | 42.39 |
| 2155   | 2015 | -0.69 | 1.03 | 0.983238 | 0.9667579  | 22.47152 | 0.005448 | 42.39 |
| 2155   | 2015 | -0.69 | 1.03 | 0.983238 | 0.9667579  | 22.47152 | 0.005448 | 42.39 |
| 2155   | 2015 | -0.48 | 1.03 | 0.983238 | 0.9667579  | 22.47152 | 0.005448 | 42.39 |
| 2155   | 2015 | -0.48 | 1.03 | 0.983238 | 0.9667579  | 22.47152 | 0.005448 | 42.39 |
| 2155   | 2015 | -0.34 | 1.03 | 0.983238 | 0.9667579  | 22.47152 | 0.005448 | 42.39 |
| 2155   | 2015 | -0.69 | 1.03 | 0.983238 | 0.9667579  | 22.47152 | 0.005448 | 42.39 |
| 2155   | 2015 | -0.69 | 1.03 | 0.983238 | 0.9667579  | 22.47152 | 0.005448 | 42.39 |
| 100    | 2015 | -0.67 | 0.09 | 0.128152 | 0.01642299 | 25.43957 | 0.085837 | 7.84  |
| 300322 | 2015 | 0.245 | 0.09 | 0.128152 | 0.01642299 | 20.97474 | -0.21789 | 33.51 |
| 300014 | 2015 | -0.23 | 0.09 | 0.128152 | 0.01642299 | 21.63473 | 0.093596 | 42.18 |
| 100    | 2015 | -0.67 | 0.09 | 0.128152 | 0.01642299 | 25.43957 | 0.085837 | 7.84  |
| 100    | 2015 | -0.11 | 0.09 | 0.128152 | 0.01642299 | 25.43957 | 0.085837 | 7.84  |
| 100    | 2015 | -0.49 | 0.09 | 0.128152 | 0.01642299 | 25.43957 | 0.085837 | 7.84  |
| 100    | 2015 | 0.315 | 0.09 | 0.128152 | 0.01642299 | 25.43957 | 0.085837 | 7.84  |
| 100    | 2015 | 0.369 | 0.09 | 0.128152 | 0.01642299 | 25.43957 | 0.085837 | 7.84  |
| 100    | 2015 | -0.51 | 0.09 | 0.128152 | 0.01642299 | 25.43957 | 0.085837 | 7.84  |
| 100    | 2015 | 0.287 | 0.09 | 0.128152 | 0.01642299 | 25.43957 | 0.085837 | 7.84  |
| 300014 | 2015 | -0.2  | 0.09 | 0.128152 | 0.01642299 | 21.63473 | 0.093596 | 42.18 |
| 300322 | 2015 | 0.715 | 0.09 | 0.128152 | 0.01642299 | 20.7647  | -0.21789 | 33.51 |
| 100    | 2015 | -0.67 | 0.09 | 0.128152 | 0.01642299 | 25.43957 | 0.085837 | 7.84  |
| 100    | 2015 | 0.291 | 0.09 | 0.128152 | 0.01642299 | 25.43957 | 0.085837 | 7.84  |
| 300014 | 2015 | -0.02 | 0.09 | 0.128152 | 0.01642299 | 21.63473 | 0.093596 | 42.18 |
| 100    | 2015 | -0.11 | 0.09 | 0.128152 | 0.01642299 | 25.43957 | 0.085837 | 7.84  |
| 100    | 2015 | -0.11 | 0.09 | 0.128152 | 0.01642299 | 25.43957 | 0.085837 | 7.84  |
| 100    | 2015 | -0.34 | 0.09 | 0.128152 | 0.01642299 | 25.43957 | 0.085837 | 7.84  |
| 2579   | 2015 | -0.5  | 0.09 | 0.128152 | 0.01642299 | 20.95538 | 0.044663 | 31.92 |
| 300322 | 2015 | 0.245 | 0.09 | 0.128152 | 0.01642299 | 20.97474 | -0.21789 | 33.51 |
| 100    | 2015 | -0.11 | 0.09 | 0.128152 | 0.01642299 | 25.43957 | 0.085837 | 7.84  |
| 100    | 2015 | -0.67 | 0.09 | 0.128152 | 0.01642299 | 25.43957 | 0.085837 | 7.84  |
| 100    | 2015 | -0.11 | 0.09 | 0.128152 | 0.01642299 | 25.43957 | 0.085837 | 7.84  |
| 300322 | 2015 | 0.715 | 0.09 | 0.128152 | 0.01642299 | 20.97474 | -0.21789 | 33.51 |
| 100    | 2015 | -0.5  | 0.09 | 0.128152 | 0.01642299 | 25.43957 | 0.085837 | 7.84  |
| 300014 | 2015 | -0.29 | 0.09 | 0.128152 | 0.01642299 | 21.55588 | 0.093596 | 42.18 |
| 100    | 2015 | -0.11 | 0.09 | 0.128152 | 0.01642299 | 25.43957 | 0.085837 | 7.84  |
| 100    | 2015 | 0.658 | 0.09 | 0.128152 | 0.01642299 | 25.43957 | 0.085837 | 7.84  |
| 2579   | 2015 | 0.328 | 0.09 | 0.128152 | 0.01642299 | 20.78768 | 0.044663 | 31.92 |
| 100    | 2015 | -0.67 | 0.09 | 0.128152 | 0.01642299 | 25.43957 | 0.085837 | 7.84  |
| 100    | 2015 | -0.11 | 0.09 | 0.128152 | 0.01642299 | 25.43957 | 0.085837 | 7.84  |
| 100    | 2015 | 0.658 | 0.09 | 0.128152 | 0.01642299 | 25.43957 | 0.085837 | 7.84  |
| 300014 | 2015 | -0.22 | 0.09 | 0.128152 | 0.01642299 | 21.63473 | 0.093596 | 42.18 |
| 100    | 2015 | -0.11 | 0.09 | 0.128152 | 0.01642299 | 25.43957 | 0.085837 | 7.84  |
| 100    | 2015 | -0.11 | 0.09 | 0.128152 | 0.01642299 | 25.43957 | 0.085837 | 7.84  |
| 100    | 2015 | -0.11 | 0.09 | 0.128152 | 0.01642299 | 25.43957 | 0.085837 | 7.84  |

|        |      |       |      |          |            |          |          |       |
|--------|------|-------|------|----------|------------|----------|----------|-------|
| 100    | 2015 | 0.658 | 0.09 | 0.128152 | 0.01642299 | 25.43957 | 0.085837 | 7.84  |
| 100    | 2015 | -0.11 | 0.09 | 0.128152 | 0.01642299 | 25.43957 | 0.085837 | 7.84  |
| 100    | 2015 | -0.64 | 0.09 | 0.128152 | 0.01642299 | 25.43957 | 0.085837 | 7.84  |
| 300322 | 2015 | 0.606 | 0.09 | 0.128152 | 0.01642299 | 20.97474 | -0.21789 | 33.51 |
| 100    | 2015 | -0.11 | 0.09 | 0.128152 | 0.01642299 | 25.43957 | 0.085837 | 7.84  |
| 2579   | 2015 | 0.328 | 0.09 | 0.128152 | 0.01642299 | 20.78768 | 0.044663 | 31.92 |
| 2579   | 2015 | -0.5  | 0.09 | 0.128152 | 0.01642299 | 20.78768 | 0.044663 | 31.92 |
| 100    | 2015 | -0    | 0.09 | 0.128152 | 0.01642299 | 25.43957 | 0.085837 | 7.84  |
| 100    | 2015 | -0.11 | 0.09 | 0.128152 | 0.01642299 | 25.43957 | 0.085837 | 7.84  |
| 2579   | 2015 | -0.44 | 0.09 | 0.128152 | 0.01642299 | 20.78768 | 0.044663 | 31.92 |
| 100    | 2015 | 0.291 | 0.09 | 0.128152 | 0.01642299 | 25.43957 | 0.085837 | 7.84  |
| 100    | 2015 | -0.11 | 0.09 | 0.128152 | 0.01642299 | 25.43957 | 0.085837 | 7.84  |
| 100    | 2015 | -0.48 | 0.09 | 0.128152 | 0.01642299 | 25.43957 | 0.085837 | 7.84  |
| 300014 | 2015 | -0.2  | 0.09 | 0.128152 | 0.01642299 | 21.63473 | 0.093596 | 42.18 |
| 300014 | 2015 | -0.22 | 0.09 | 0.128152 | 0.01642299 | 21.63473 | 0.093596 | 42.18 |
| 100    | 2015 | -0.52 | 0.09 | 0.128152 | 0.01642299 | 25.43957 | 0.085837 | 7.84  |
| 300322 | 2015 | 0.245 | 0.09 | 0.128152 | 0.01642299 | 20.97474 | -0.21789 | 33.51 |
| 100    | 2015 | -0.11 | 0.09 | 0.128152 | 0.01642299 | 25.43957 | 0.085837 | 7.84  |
| 2579   | 2015 | -0.3  | 0.09 | 0.128152 | 0.01642299 | 20.78768 | 0.044663 | 31.92 |
| 100    | 2015 | -0.11 | 0.09 | 0.128152 | 0.01642299 | 25.43957 | 0.085837 | 7.84  |
| 300322 | 2015 | 0.691 | 0.09 | 0.128152 | 0.01642299 | 20.97474 | -0.21789 | 33.51 |
| 300322 | 2015 | 0.547 | 0.09 | 0.128152 | 0.01642299 | 20.97474 | -0.21789 | 33.51 |
| 100    | 2015 | -0.6  | 0.09 | 0.128152 | 0.01642299 | 25.43957 | 0.085837 | 7.84  |
| 100    | 2015 | -0.11 | 0.09 | 0.128152 | 0.01642299 | 25.43957 | 0.085837 | 7.84  |
| 100    | 2015 | -0.67 | 0.09 | 0.128152 | 0.01642299 | 25.43957 | 0.085837 | 7.84  |
| 300014 | 2015 | -0.14 | 0.09 | 0.128152 | 0.01642299 | 21.63473 | 0.093596 | 42.18 |
| 100    | 2015 | 0.524 | 0.09 | 0.128152 | 0.01642299 | 25.43957 | 0.085837 | 7.84  |
| 100    | 2015 | -0.45 | 0.09 | 0.128152 | 0.01642299 | 24.39831 | 0.085837 | 7.84  |
| 100    | 2015 | -0.67 | 0.09 | 0.128152 | 0.01642299 | 25.43957 | 0.085837 | 7.84  |
| 100    | 2015 | -0.34 | 0.09 | 0.128152 | 0.01642299 | 25.43957 | 0.085837 | 7.84  |
| 100    | 2015 | -0.02 | 0.09 | 0.128152 | 0.01642299 | 25.43957 | 0.085837 | 7.84  |
| 100    | 2015 | 0.557 | 0.09 | 0.128152 | 0.01642299 | 25.43957 | 0.085837 | 7.84  |
| 100    | 2015 | -0.67 | 0.09 | 0.128152 | 0.01642299 | 25.43957 | 0.085837 | 7.84  |
| 100    | 2015 | -0.67 | 0.09 | 0.128152 | 0.01642299 | 25.43957 | 0.085837 | 7.84  |
| 2579   | 2015 | -0.44 | 0.09 | 0.128152 | 0.01642299 | 20.78768 | 0.044663 | 31.92 |
| 100    | 2015 | -0.3  | 0.09 | 0.128152 | 0.01642299 | 25.43957 | 0.085837 | 7.84  |
| 100    | 2015 | 0.327 | 0.09 | 0.128152 | 0.01642299 | 25.43957 | 0.085837 | 7.84  |
| 100    | 2015 | -0.67 | 0.09 | 0.128152 | 0.01642299 | 25.43957 | 0.085837 | 7.84  |
| 100    | 2015 | -0.4  | 0.09 | 0.128152 | 0.01642299 | 25.43957 | 0.085837 | 7.84  |
| 300322 | 2015 | 0.458 | 0.09 | 0.128152 | 0.01642299 | 20.97474 | -0.21789 | 33.51 |
| 100    | 2015 | -0.23 | 0.09 | 0.128152 | 0.01642299 | 25.43957 | 0.043168 | 7.84  |
| 586    | 2015 | -0.27 | 0.04 | 1.130574 | 1.2781984  | 20.10336 | 0.069406 | 20.68 |
| 2268   | 2015 | 1.312 | 0.04 | 1.130574 | 1.2781984  | 21.1379  | 0.112972 | 44.2  |
| 2268   | 2015 | 1.1   | 0.04 | 1.130574 | 1.2781984  | 21.68785 | 0.112972 | 44.2  |
| 600392 | 2015 | -0.43 | 0.04 | 1.130574 | 1.2781984  | 21.55385 | 0.013168 | 20.14 |
| 2023   | 2015 | -0.26 | 0.04 | 1.130574 | 1.2781984  | 22.23637 | 0.006663 | 17.18 |
| 300362 | 2015 | -0.59 | 0.04 | 1.130574 | 1.2781984  | 22.07076 | 0.032491 | 34.85 |
| 300019 | 2015 | 0.84  | 0.04 | 1.130574 | 1.2781984  | 20.39611 | 0.134837 | 19.31 |
| 2422   | 2015 | -0.54 | 0.04 | 1.130574 | 1.2781984  | 23.84048 | 0.04854  | 26.33 |
| 2539   | 2015 | -0.61 | 0.04 | 1.130574 | 1.2781984  | 22.90547 | 0.079757 | 41.91 |
| 600391 | 2015 | 0.049 | 0.04 | 1.130574 | 1.2781984  | 22.33592 | 0.017581 | 36.02 |
| 2259   | 2015 | -0.65 | 0.04 | 1.130574 | 1.2781984  | 21.88039 | 0.015438 | 29.02 |
| 2422   | 2015 | 0.783 | 0.04 | 1.130574 | 1.2781984  | 23.84048 | 0.04854  | 26.33 |
| 600438 | 2015 | 0.432 | 0.04 | 1.130574 | 1.2781984  | 22.52987 | 0.132304 | 57.35 |

|        |      |       |      |          |           |          |          |       |
|--------|------|-------|------|----------|-----------|----------|----------|-------|
| 600674 | 2015 | 0.027 | 0.04 | 1.130574 | 1.2781984 | 23.75339 | 0.211034 | 50.61 |
| 2253   | 2015 | 1.219 | 0.04 | 1.130574 | 1.2781984 | 21.09583 | 0.028164 | 8.95  |
| 300019 | 2015 | 0.24  | 0.04 | 1.130574 | 1.2781984 | 20.61662 | 0.134837 | 19.31 |
| 586    | 2015 | 0.113 | 0.04 | 1.130574 | 1.2781984 | 20.10336 | 0.069406 | 20.68 |
| 600804 | 2015 | -0.45 | 0.04 | 1.130574 | 1.2781984 | 22.76176 | 0.129302 | 8.21  |
| 600875 | 2015 | -0.01 | 0.04 | 1.130574 | 1.2781984 | 25.17918 | 0.019164 | 41.68 |
| 600438 | 2015 | 0.432 | 0.04 | 1.130574 | 1.2781984 | 22.52987 | 0.132304 | 57.35 |
| 2422   | 2015 | -0.21 | 0.04 | 1.130574 | 1.2781984 | 23.84048 | 0.04854  | 26.33 |
| 300249 | 2015 | -0.16 | 0.04 | 1.130574 | 1.2781984 | 20.40571 | 0.030893 | 17.84 |
| 2259   | 2015 | -0.65 | 0.04 | 1.130574 | 1.2781984 | 21.53041 | 0.015438 | 29.02 |
| 600391 | 2015 | 0.049 | 0.04 | 1.130574 | 1.2781984 | 22.33592 | 0.017581 | 36.02 |
| 300028 | 2015 | -0.08 | 0.04 | 1.130574 | 1.2781984 | 20.64906 | 0.055005 | 27.8  |
| 600875 | 2015 | -0.22 | 0.04 | 1.130574 | 1.2781984 | 25.17918 | 0.019164 | 41.68 |
| 2480   | 2015 | -0.1  | 0.04 | 1.130574 | 1.2781984 | 22.35621 | -0.07077 | 24.76 |
| 600392 | 2015 | -0.43 | 0.04 | 1.130574 | 1.2781984 | 21.85361 | 0.013168 | 20.14 |
| 2190   | 2015 | -0.05 | 0.04 | 1.130574 | 1.2781984 | 22.26992 | 0.04807  | 51.33 |
| 600438 | 2015 | -0.15 | 0.04 | 1.130574 | 1.2781984 | 22.52987 | 0.132304 | 57.35 |
| 300101 | 2015 | 0.928 | 0.04 | 1.130574 | 1.2781984 | 21.02793 | 0.114207 | 38.33 |
| 600438 | 2015 | 0.432 | 0.04 | 1.130574 | 1.2781984 | 22.52987 | 0.132304 | 57.35 |
| 790    | 2015 | 0.497 | 0.04 | 1.130574 | 1.2781984 | 20.64622 | -0.06413 | 18.08 |
| 2312   | 2015 | 1.056 | 0.04 | 1.130574 | 1.2781984 | 22.65117 | -0.00855 | 30.53 |
| 2023   | 2015 | -0.26 | 0.04 | 1.130574 | 1.2781984 | 22.23637 | 0.006663 | 17.18 |
| 600438 | 2015 | -0.21 | 0.04 | 1.130574 | 1.2781984 | 22.52987 | 0.132304 | 57.35 |
| 2539   | 2015 | -0.96 | 0.04 | 1.130574 | 1.2781984 | 22.90547 | 0.079757 | 41.91 |
| 600875 | 2015 | -0.46 | 0.04 | 1.130574 | 1.2781984 | 25.17918 | 0.019164 | 41.68 |
| 600438 | 2015 | -0.15 | 0.04 | 1.130574 | 1.2781984 | 22.52987 | 0.132304 | 57.35 |
| 600392 | 2015 | -0.3  | 0.04 | 1.130574 | 1.2781984 | 21.55385 | 0.013168 | 20.14 |
| 2023   | 2015 | 0.127 | 0.04 | 1.130574 | 1.2781984 | 22.23637 | 0.006663 | 17.18 |
| 300028 | 2015 | -0.13 | 0.04 | 1.130574 | 1.2781984 | 20.64906 | 0.055005 | 27.8  |
| 2312   | 2015 | -0.27 | 0.04 | 1.130574 | 1.2781984 | 22.65117 | -0.00855 | 30.53 |
| 300028 | 2015 | 1.016 | 0.04 | 1.130574 | 1.2781984 | 20.68678 | 0.055005 | 27.8  |
| 2190   | 2015 | -0.49 | 0.04 | 1.130574 | 1.2781984 | 21.37411 | 0.04807  | 51.33 |
| 300019 | 2015 | 0.84  | 0.04 | 1.130574 | 1.2781984 | 20.39611 | 0.134837 | 19.31 |
| 790    | 2015 | 0.938 | 0.04 | 1.130574 | 1.2781984 | 20.64622 | -0.06413 | 18.08 |
| 2312   | 2015 | -0.21 | 0.04 | 1.130574 | 1.2781984 | 22.65117 | -0.00855 | 30.53 |
| 2422   | 2015 | 0.597 | 0.04 | 1.130574 | 1.2781984 | 23.84048 | 0.04854  | 26.33 |
| 600875 | 2015 | 0.659 | 0.04 | 1.130574 | 1.2781984 | 25.17918 | 0.019164 | 41.68 |
| 300362 | 2015 | -0.72 | 0.04 | 1.130574 | 1.2781984 | 22.07076 | 0.032491 | 34.85 |
| 600875 | 2015 | -0.18 | 0.04 | 1.130574 | 1.2781984 | 25.17918 | 0.019164 | 41.68 |
| 2268   | 2015 | 0.862 | 0.04 | 1.130574 | 1.2781984 | 21.68785 | 0.112972 | 44.2  |
| 600438 | 2015 | -0.63 | 0.04 | 1.130574 | 1.2781984 | 22.52987 | 0.132304 | 57.35 |
| 300366 | 2015 | -0.07 | 0.04 | 1.130574 | 1.2781984 | 21.24949 | 0.073311 | 36.41 |
| 2312   | 2015 | 0.142 | 0.04 | 1.130574 | 1.2781984 | 22.6499  | -0.00855 | 30.53 |
| 600804 | 2015 | 0.677 | 0.04 | 1.130574 | 1.2781984 | 23.64587 | 0.129302 | 8.21  |
| 300101 | 2015 | 1.317 | 0.04 | 1.130574 | 1.2781984 | 21.02793 | 0.114207 | 38.33 |
| 586    | 2015 | -0.27 | 0.04 | 1.130574 | 1.2781984 | 20.10336 | 0.069406 | 20.68 |
| 2480   | 2015 | 0.565 | 0.04 | 1.130574 | 1.2781984 | 22.35621 | -0.07077 | 24.76 |
| 600392 | 2015 | -0.46 | 0.04 | 1.130574 | 1.2781984 | 21.85361 | 0.013168 | 20.14 |
| 2312   | 2015 | -0.21 | 0.04 | 1.130574 | 1.2781984 | 22.65117 | -0.00855 | 30.53 |
| 600391 | 2015 | 0.064 | 0.04 | 1.130574 | 1.2781984 | 22.33592 | 0.017581 | 36.02 |
| 2312   | 2015 | -0.08 | 0.04 | 1.130574 | 1.2781984 | 22.65117 | -0.00855 | 30.53 |
| 2539   | 2015 | -0.61 | 0.04 | 1.130574 | 1.2781984 | 22.90547 | 0.079757 | 41.91 |
| 2268   | 2015 | 1.187 | 0.04 | 1.130574 | 1.2781984 | 21.68785 | 0.112972 | 44.2  |
| 586    | 2015 | -0.31 | 0.04 | 1.130574 | 1.2781984 | 20.10336 | 0.069406 | 20.68 |



|        |      |       |      |          |           |          |          |       |
|--------|------|-------|------|----------|-----------|----------|----------|-------|
| 2480   | 2015 | 1.228 | 0.04 | 1.130574 | 1.2781984 | 22.35621 | -0.07077 | 24.76 |
| 600353 | 2015 | -0.65 | 0.04 | 1.130574 | 1.2781984 | 21.13311 | 0.059094 | 27.91 |
| 912    | 2015 | -0.32 | 0.04 | 1.130574 | 1.2781984 | 22.83789 | -0.03974 | 54.38 |
| 300127 | 2015 | -0.13 | 0.04 | 1.130574 | 1.2781984 | 20.84747 | 0.088788 | 33.98 |
| 600674 | 2015 | -0.84 | 0.04 | 1.130574 | 1.2781984 | 23.75339 | 0.211034 | 50.61 |
| 600438 | 2015 | -0.2  | 0.04 | 1.130574 | 1.2781984 | 22.52987 | 0.132304 | 57.35 |
| 600438 | 2015 | -0.25 | 0.04 | 1.130574 | 1.2781984 | 22.52987 | 0.132304 | 57.35 |
| 600880 | 2015 | 0.593 | 0.04 | 1.130574 | 1.2781984 | 22.22794 | 0.016442 | 23.37 |
| 2539   | 2015 | -0.81 | 0.04 | 1.130574 | 1.2781984 | 22.90547 | 0.079757 | 41.91 |
| 2190   | 2015 | -0.49 | 0.04 | 1.130574 | 1.2781984 | 22.26992 | 0.04807  | 51.33 |
| 2539   | 2015 | -0.58 | 0.04 | 1.130574 | 1.2781984 | 22.59287 | 0.079757 | 41.91 |
| 2190   | 2015 | -0.08 | 0.04 | 1.130574 | 1.2781984 | 22.26992 | 0.04807  | 51.33 |
| 2259   | 2015 | -0.65 | 0.04 | 1.130574 | 1.2781984 | 21.88039 | 0.015438 | 29.02 |
| 300019 | 2015 | 0.326 | 0.04 | 1.130574 | 1.2781984 | 20.39611 | 0.134837 | 19.31 |
| 300249 | 2015 | -0.16 | 0.04 | 1.130574 | 1.2781984 | 21.18157 | 0.030893 | 17.84 |
| 2422   | 2015 | -0.38 | 0.04 | 1.130574 | 1.2781984 | 23.84048 | 0.04854  | 26.33 |
| 912    | 2015 | 0.418 | 0.04 | 1.130574 | 1.2781984 | 22.83789 | -0.03974 | 54.38 |
| 2190   | 2015 | -0.05 | 0.04 | 1.130574 | 1.2781984 | 22.26992 | 0.04807  | 51.33 |
| 600438 | 2015 | -0.25 | 0.04 | 1.130574 | 1.2781984 | 22.52987 | 0.132304 | 57.35 |
| 600875 | 2015 | -0.01 | 0.04 | 1.130574 | 1.2781984 | 25.17918 | 0.019164 | 41.68 |
| 2190   | 2015 | 0.149 | 0.04 | 1.130574 | 1.2781984 | 22.26992 | 0.04807  | 51.33 |
| 2422   | 2015 | -0.45 | 0.04 | 1.130574 | 1.2781984 | 23.71136 | 0.04854  | 26.33 |
| 2539   | 2015 | -0.96 | 0.04 | 1.130574 | 1.2781984 | 22.90547 | 0.079757 | 41.91 |
| 600392 | 2015 | -0.46 | 0.04 | 1.130574 | 1.2781984 | 21.85361 | 0.013168 | 20.14 |
| 300019 | 2015 | 0.326 | 0.04 | 1.130574 | 1.2781984 | 20.39611 | 0.134837 | 19.31 |
| 2539   | 2015 | -0.61 | 0.04 | 1.130574 | 1.2781984 | 22.90547 | 0.079757 | 41.91 |
| 2259   | 2015 | -0.65 | 0.04 | 1.130574 | 1.2781984 | 21.88039 | 0.015438 | 29.02 |
| 600875 | 2015 | -0.52 | 0.04 | 1.130574 | 1.2781984 | 25.17918 | 0.019164 | 41.68 |
| 600674 | 2015 | -0.41 | 0.04 | 1.130574 | 1.2781984 | 23.91022 | 0.211034 | 50.61 |
| 600674 | 2015 | 0.027 | 0.04 | 1.130574 | 1.2781984 | 23.75339 | 0.211034 | 50.61 |
| 600391 | 2015 | 0.094 | 0.04 | 1.130574 | 1.2781984 | 22.33592 | 0.017581 | 36.02 |
| 2268   | 2015 | 1.312 | 0.04 | 1.130574 | 1.2781984 | 21.68785 | 0.112972 | 44.2  |
| 790    | 2015 | 0.497 | 0.04 | 1.130574 | 1.2781984 | 20.64622 | -0.06413 | 18.08 |
| 2312   | 2015 | -0.27 | 0.04 | 1.130574 | 1.2781984 | 22.65117 | -0.00855 | 30.53 |
| 790    | 2015 | 0.276 | 0.04 | 1.130574 | 1.2781984 | 20.64622 | -0.06413 | 18.08 |
| 790    | 2015 | 0.938 | 0.04 | 1.130574 | 1.2781984 | 20.54004 | -0.06413 | 18.08 |
| 600353 | 2015 | -0.65 | 0.04 | 1.130574 | 1.2781984 | 21.13311 | 0.059094 | 27.91 |
| 600674 | 2015 | -0.41 | 0.04 | 1.130574 | 1.2781984 | 23.75339 | 0.211034 | 50.61 |
| 2190   | 2015 | -0.08 | 0.04 | 1.130574 | 1.2781984 | 22.26992 | 0.04807  | 51.33 |
| 2480   | 2015 | -0.1  | 0.04 | 1.130574 | 1.2781984 | 22.35621 | -0.07077 | 24.76 |
| 2651   | 2015 | -0.26 | 0.04 | 1.130574 | 1.2781984 | 21.53912 | 0.07775  | 36.21 |
| 600353 | 2015 | -0.66 | 0.04 | 1.130574 | 1.2781984 | 21.13311 | 0.059094 | 27.91 |
| 600392 | 2015 | -0.58 | 0.04 | 1.130574 | 1.2781984 | 21.55385 | 0.013168 | 20.14 |
| 600804 | 2015 | -0.65 | 0.04 | 1.130574 | 1.2781984 | 23.64587 | 0.129302 | 8.21  |
| 300101 | 2015 | 0.358 | 0.04 | 1.130574 | 1.2781984 | 21.02793 | 0.114207 | 38.33 |
| 600391 | 2015 | 0.059 | 0.04 | 1.130574 | 1.2781984 | 22.33592 | 0.017581 | 36.02 |
| 2422   | 2015 | -0.47 | 0.04 | 1.130574 | 1.2781984 | 23.84048 | 0.04854  | 26.33 |
| 2480   | 2015 | 0.422 | 0.04 | 1.130574 | 1.2781984 | 22.35621 | -0.07077 | 24.76 |
| 2539   | 2015 | -0.77 | 0.04 | 1.130574 | 1.2781984 | 22.90547 | 0.079757 | 41.91 |
| 2539   | 2015 | -0.76 | 0.04 | 1.130574 | 1.2781984 | 22.90547 | 0.079757 | 41.91 |
| 600875 | 2015 | -0.67 | 0.04 | 1.130574 | 1.2781984 | 25.17918 | 0.019164 | 41.68 |
| 2539   | 2015 | -0.82 | 0.04 | 1.130574 | 1.2781984 | 22.90547 | 0.079757 | 41.91 |
| 2651   | 2015 | -0.19 | 0.04 | 1.130574 | 1.2781984 | 21.63863 | 0.07775  | 36.21 |
| 600378 | 2015 | 0.548 | 0.04 | 1.130574 | 1.2781984 | 20.69485 | 0.057558 | 23.82 |

|        |      |       |      |          |           |          |          |       |
|--------|------|-------|------|----------|-----------|----------|----------|-------|
| 2422   | 2015 | -0.54 | 0.04 | 1.130574 | 1.2781984 | 23.84048 | 0.04854  | 26.33 |
| 600378 | 2015 | 0.548 | 0.04 | 1.130574 | 1.2781984 | 20.71644 | 0.057558 | 23.82 |
| 300249 | 2015 | -0.16 | 0.04 | 1.130574 | 1.2781984 | 20.40571 | 0.030893 | 17.84 |
| 2253   | 2015 | 1.881 | 0.04 | 1.130574 | 1.2781984 | 21.09583 | 0.028164 | 8.95  |
| 2651   | 2015 | -0.4  | 0.04 | 1.130574 | 1.2781984 | 21.63863 | 0.07775  | 36.21 |
| 2422   | 2015 | -0.5  | 0.04 | 1.130574 | 1.2781984 | 23.84048 | 0.04854  | 26.33 |
| 600880 | 2015 | -0.27 | 0.04 | 1.130574 | 1.2781984 | 21.98579 | 0.016442 | 23.37 |
| 2539   | 2015 | -0.96 | 0.04 | 1.130574 | 1.2781984 | 22.90547 | 0.079757 | 41.91 |
| 2422   | 2015 | -0.5  | 0.04 | 1.130574 | 1.2781984 | 23.84048 | 0.04854  | 26.33 |
| 600875 | 2015 | -0.03 | 0.04 | 1.130574 | 1.2781984 | 25.17918 | 0.019164 | 41.68 |
| 300028 | 2015 | 1.016 | 0.04 | 1.130574 | 1.2781984 | 20.64906 | 0.055005 | 27.8  |
| 2480   | 2015 | 0.894 | 0.04 | 1.130574 | 1.2781984 | 22.35621 | -0.07077 | 24.76 |
| 2480   | 2015 | 0.343 | 0.04 | 1.130574 | 1.2781984 | 22.35621 | -0.07077 | 24.76 |
| 600804 | 2015 | -0.65 | 0.04 | 1.130574 | 1.2781984 | 23.64587 | 0.129302 | 8.21  |
| 600875 | 2015 | -0.41 | 0.04 | 1.130574 | 1.2781984 | 25.17918 | 0.019164 | 41.68 |
| 300101 | 2015 | 1.453 | 0.04 | 1.130574 | 1.2781984 | 20.54796 | 0.114207 | 38.33 |
| 2651   | 2015 | -0.4  | 0.04 | 1.130574 | 1.2781984 | 21.63863 | 0.07775  | 36.21 |
| 2023   | 2015 | -0.26 | 0.04 | 1.130574 | 1.2781984 | 22.23637 | 0.006663 | 17.18 |
| 2253   | 2015 | 2.017 | 0.04 | 1.130574 | 1.2781984 | 21.09583 | 0.028164 | 8.95  |
| 300127 | 2015 | -0.13 | 0.04 | 1.130574 | 1.2781984 | 20.84747 | 0.088788 | 33.98 |
| 2312   | 2015 | 0.233 | 0.04 | 1.130574 | 1.2781984 | 22.65117 | -0.00855 | 30.53 |
| 600880 | 2015 | -0.27 | 0.04 | 1.130574 | 1.2781984 | 22.22794 | 0.016442 | 23.37 |
| 600438 | 2015 | -0.89 | 0.04 | 1.130574 | 1.2781984 | 22.52987 | 0.132304 | 57.35 |
| 2190   | 2015 | 0.149 | 0.04 | 1.130574 | 1.2781984 | 22.26992 | 0.04807  | 51.33 |
| 2422   | 2015 | -0.06 | 0.04 | 1.130574 | 1.2781984 | 23.84048 | 0.04854  | 26.33 |
| 2422   | 2015 | 0.783 | 0.04 | 1.130574 | 1.2781984 | 23.84048 | 0.04854  | 26.33 |
| 600875 | 2015 | -0.34 | 0.04 | 1.130574 | 1.2781984 | 25.17918 | 0.019164 | 41.68 |
| 2422   | 2015 | -0.32 | 0.04 | 1.130574 | 1.2781984 | 23.84048 | 0.04854  | 26.33 |
| 586    | 2015 | -0.7  | 0.04 | 1.130574 | 1.2781984 | 20.10336 | 0.069406 | 20.68 |
| 2023   | 2015 | 0.086 | 0.04 | 1.130574 | 1.2781984 | 22.04459 | 0.006663 | 17.18 |
| 300249 | 2015 | -0.16 | 0.04 | 1.130574 | 1.2781984 | 20.40571 | 0.030893 | 17.84 |
| 2422   | 2015 | -0.37 | 0.04 | 1.130574 | 1.2781984 | 23.84048 | 0.04854  | 26.33 |
| 600438 | 2015 | 0.432 | 0.04 | 1.130574 | 1.2781984 | 22.52987 | 0.132304 | 57.35 |
| 300249 | 2015 | -0.27 | 0.04 | 1.130574 | 1.2781984 | 20.40571 | 0.030893 | 17.84 |
| 2253   | 2015 | 2.03  | 0.04 | 1.130574 | 1.2781984 | 21.09583 | 0.028164 | 8.95  |
| 600438 | 2015 | 0.432 | 0.04 | 1.130574 | 1.2781984 | 22.52987 | 0.132304 | 57.35 |
| 300362 | 2015 | -0.72 | 0.04 | 1.130574 | 1.2781984 | 21.87125 | 0.032491 | 34.85 |
| 2539   | 2015 | -0.61 | 0.04 | 1.130574 | 1.2781984 | 22.90547 | 0.079757 | 41.91 |
| 300101 | 2015 | 1.682 | 0.04 | 1.130574 | 1.2781984 | 21.02793 | 0.114207 | 38.33 |
| 600875 | 2015 | -0.35 | 0.04 | 1.130574 | 1.2781984 | 25.17918 | 0.019164 | 41.68 |
| 600438 | 2015 | 0.432 | 0.04 | 1.130574 | 1.2781984 | 22.52987 | 0.132304 | 57.35 |
| 600880 | 2015 | 0.593 | 0.04 | 1.130574 | 1.2781984 | 22.22794 | 0.016442 | 23.37 |
| 300366 | 2015 | -0.07 | 0.04 | 1.130574 | 1.2781984 | 21.08684 | 0.073311 | 36.41 |
| 600804 | 2015 | 0.677 | 0.04 | 1.130574 | 1.2781984 | 23.64587 | 0.129302 | 8.21  |
| 300028 | 2015 | -0.13 | 0.04 | 1.130574 | 1.2781984 | 20.64906 | 0.055005 | 27.8  |
| 2422   | 2015 | -0.19 | 0.04 | 1.130574 | 1.2781984 | 23.84048 | 0.04854  | 26.33 |
| 600392 | 2015 | -0.81 | 0.04 | 1.130574 | 1.2781984 | 21.85361 | 0.013168 | 20.14 |
| 600391 | 2015 | 0.057 | 0.04 | 1.130574 | 1.2781984 | 22.1154  | 0.017581 | 36.02 |
| 300019 | 2015 | 0.24  | 0.04 | 1.130574 | 1.2781984 | 20.39611 | 0.134837 | 19.31 |
| 300249 | 2015 | -0.16 | 0.04 | 1.130574 | 1.2781984 | 20.40571 | 0.030893 | 17.84 |
| 2023   | 2015 | 0.249 | 0.04 | 1.130574 | 1.2781984 | 22.23637 | 0.006663 | 17.18 |
| 586    | 2015 | -0.7  | 0.04 | 1.130574 | 1.2781984 | 20.10336 | 0.069406 | 20.68 |
| 2480   | 2015 | 0.894 | 0.04 | 1.130574 | 1.2781984 | 22.35621 | -0.07077 | 24.76 |
| 790    | 2015 | 0.938 | 0.04 | 1.130574 | 1.2781984 | 20.64622 | -0.06413 | 18.08 |

|        |      |       |      |          |           |          |          |       |
|--------|------|-------|------|----------|-----------|----------|----------|-------|
| 912    | 2015 | -0.91 | 0.04 | 1.130574 | 1.2781984 | 22.83789 | -0.03974 | 54.38 |
| 300249 | 2015 | -0.38 | 0.04 | 1.130574 | 1.2781984 | 20.40571 | 0.030893 | 17.84 |
| 2190   | 2015 | -0.49 | 0.04 | 1.130574 | 1.2781984 | 22.26992 | 0.04807  | 51.33 |
| 790    | 2015 | 0.607 | 0.04 | 1.130574 | 1.2781984 | 20.64622 | -0.06413 | 18.08 |
| 2422   | 2015 | -0.54 | 0.04 | 1.130574 | 1.2781984 | 23.84048 | 0.04854  | 26.33 |
| 300362 | 2015 | -0.66 | 0.04 | 1.130574 | 1.2781984 | 22.07076 | 0.032491 | 34.85 |
| 2312   | 2015 | 0.186 | 0.04 | 1.130574 | 1.2781984 | 22.65117 | -0.00855 | 30.53 |
| 2268   | 2015 | 1.312 | 0.04 | 1.130574 | 1.2781984 | 21.68785 | 0.112972 | 44.2  |
| 2268   | 2015 | 1.021 | 0.04 | 1.130574 | 1.2781984 | 21.68785 | 0.112972 | 44.2  |
| 2268   | 2015 | 0.925 | 0.04 | 1.130574 | 1.2781984 | 21.68785 | 0.112972 | 44.2  |
| 2422   | 2015 | -0.47 | 0.04 | 1.130574 | 1.2781984 | 23.84048 | 0.04854  | 26.33 |
| 600391 | 2015 | 0.057 | 0.04 | 1.130574 | 1.2781984 | 22.33592 | 0.017581 | 36.02 |
| 600674 | 2015 | -0.84 | 0.04 | 1.130574 | 1.2781984 | 23.75339 | 0.211034 | 50.61 |
| 2253   | 2015 | 2.544 | 0.04 | 1.130574 | 1.2781984 | 21.19768 | 0.028164 | 8.95  |
| 2253   | 2015 | 2.03  | 0.04 | 1.130574 | 1.2781984 | 21.09583 | 0.028164 | 8.95  |
| 2253   | 2015 | 2.544 | 0.04 | 1.130574 | 1.2781984 | 21.09583 | 0.028164 | 8.95  |
| 2651   | 2015 | -0.19 | 0.04 | 1.130574 | 1.2781984 | 21.63863 | 0.07775  | 36.21 |
| 2023   | 2015 | -0.26 | 0.04 | 1.130574 | 1.2781984 | 22.23637 | 0.006663 | 17.18 |
| 912    | 2015 | 0.418 | 0.04 | 1.130574 | 1.2781984 | 22.83789 | -0.03974 | 54.38 |
| 2268   | 2015 | 0.314 | 0.04 | 1.130574 | 1.2781984 | 21.68785 | 0.112972 | 44.2  |
| 912    | 2015 | -0.91 | 0.04 | 1.130574 | 1.2781984 | 21.6842  | -0.03974 | 54.38 |
| 600875 | 2015 | -0.23 | 0.04 | 1.130574 | 1.2781984 | 25.17918 | 0.019164 | 41.68 |
| 2190   | 2015 | 0.836 | 0.04 | 1.130574 | 1.2781984 | 22.26992 | 0.04807  | 51.33 |
| 2539   | 2015 | -0.58 | 0.04 | 1.130574 | 1.2781984 | 22.90547 | 0.079757 | 41.91 |
| 600880 | 2015 | 0.394 | 0.04 | 1.130574 | 1.2781984 | 22.22794 | 0.016442 | 23.37 |
| 600875 | 2015 | 0.006 | 0.04 | 1.130574 | 1.2781984 | 25.17918 | 0.019164 | 41.68 |
| 600378 | 2015 | 0.548 | 0.04 | 1.130574 | 1.2781984 | 20.71644 | 0.057558 | 23.82 |
| 300101 | 2015 | 1.086 | 0.04 | 1.130574 | 1.2781984 | 21.02793 | 0.114207 | 38.33 |
| 586    | 2015 | -0.7  | 0.04 | 1.130574 | 1.2781984 | 20.10336 | 0.069406 | 20.68 |
| 586    | 2015 | -0.7  | 0.04 | 1.130574 | 1.2781984 | 20.10336 | 0.069406 | 20.68 |
| 600875 | 2015 | -0.35 | 0.04 | 1.130574 | 1.2781984 | 25.17918 | 0.019164 | 41.68 |
| 2422   | 2015 | -0.54 | 0.04 | 1.130574 | 1.2781984 | 23.84048 | 0.04854  | 26.33 |
| 300127 | 2015 | -0.13 | 0.04 | 1.130574 | 1.2781984 | 20.83182 | 0.088788 | 33.98 |
| 2480   | 2015 | 0.343 | 0.04 | 1.130574 | 1.2781984 | 22.2106  | -0.07077 | 24.76 |
| 600875 | 2015 | -0.08 | 0.04 | 1.130574 | 1.2781984 | 24.52738 | 0.019164 | 41.68 |
| 600438 | 2015 | -0.21 | 0.04 | 1.130574 | 1.2781984 | 22.52987 | 0.132304 | 57.35 |
| 2422   | 2015 | -0.19 | 0.04 | 1.130574 | 1.2781984 | 23.84048 | 0.04854  | 26.33 |
| 600438 | 2015 | 0.432 | 0.04 | 1.130574 | 1.2781984 | 22.52987 | 0.132304 | 57.35 |
| 2023   | 2015 | -0.26 | 0.04 | 1.130574 | 1.2781984 | 22.23637 | 0.006663 | 17.18 |
| 600438 | 2015 | -0.57 | 0.04 | 1.130574 | 1.2781984 | 22.39559 | 0.132304 | 57.35 |
| 600875 | 2015 | -0.23 | 0.04 | 1.130574 | 1.2781984 | 25.17918 | 0.019164 | 41.68 |
| 912    | 2015 | -0.91 | 0.04 | 1.130574 | 1.2781984 | 22.83789 | -0.03974 | 54.38 |
| 600880 | 2015 | -0.27 | 0.04 | 1.130574 | 1.2781984 | 22.22794 | 0.016442 | 23.37 |
| 300362 | 2015 | -0.59 | 0.04 | 1.130574 | 1.2781984 | 22.07076 | 0.032491 | 34.85 |
| 600353 | 2015 | -0.73 | 0.04 | 1.130574 | 1.2781984 | 20.89156 | 0.059094 | 27.91 |
| 300101 | 2015 | 0.928 | 0.04 | 1.130574 | 1.2781984 | 21.02793 | 0.114207 | 38.33 |
| 600392 | 2015 | -0.94 | 0.04 | 1.130574 | 1.2781984 | 21.55385 | 0.013168 | 20.14 |
| 300366 | 2015 | -0.07 | 0.04 | 1.130574 | 1.2781984 | 21.24949 | 0.073311 | 36.41 |
| 600353 | 2015 | -0.73 | 0.04 | 1.130574 | 1.2781984 | 21.13311 | 0.059094 | 27.91 |
| 2268   | 2015 | 1.1   | 0.04 | 1.130574 | 1.2781984 | 21.68785 | 0.112972 | 44.2  |
| 2422   | 2015 | 0.783 | 0.04 | 1.130574 | 1.2781984 | 23.84048 | 0.04854  | 26.33 |
| 2259   | 2015 | -0.65 | 0.04 | 1.130574 | 1.2781984 | 21.88039 | 0.015438 | 29.02 |
| 300249 | 2015 | -0.38 | 0.04 | 1.130574 | 1.2781984 | 20.40571 | 0.030893 | 17.84 |
| 2422   | 2015 | -0.54 | 0.04 | 1.130574 | 1.2781984 | 23.84048 | 0.04854  | 26.33 |

|        |      |       |      |          |            |          |          |       |
|--------|------|-------|------|----------|------------|----------|----------|-------|
| 848    | 2015 | -0.17 | 0.02 | 1.292119 | 1.6695711  | 21.57059 | 0.275422 | 40.68 |
| 848    | 2015 | -0.17 | 0.02 | 1.292119 | 1.6695711  | 21.63612 | 0.275422 | 40.68 |
| 848    | 2015 | -0.17 | 0.02 | 1.292119 | 1.6695711  | 21.57059 | 0.275422 | 40.68 |
| 300294 | 2015 | -0.54 | 0.08 | 1.001104 | 1.0022081  | 21.50635 | 0.087545 | 33.44 |
| 300294 | 2015 | -0.54 | 0.08 | 1.001104 | 1.0022081  | 21.50635 | 0.087545 | 33.44 |
| 300294 | 2015 | -0.54 | 0.08 | 1.001104 | 1.0022081  | 21.50635 | 0.087545 | 33.44 |
| 300294 | 2015 | 0.609 | 0.08 | 1.001104 | 1.0022081  | 21.44938 | 0.087545 | 33.44 |
| 300294 | 2015 | 0.378 | 0.08 | 1.001104 | 1.0022081  | 21.50635 | 0.087545 | 33.44 |
| 300294 | 2015 | 0.609 | 0.08 | 1.001104 | 1.0022081  | 21.50635 | 0.087545 | 33.44 |
| 600399 | 2015 | 0.123 | 0.01 | 0.092976 | 0.00864447 | 23.28784 | 0.102503 | 38.58 |
| 600399 | 2015 | 0.123 | 0.01 | 0.092976 | 0.00864447 | 23.28784 | 0.102503 | 38.58 |
| 600399 | 2015 | 0.123 | 0.01 | 0.092976 | 0.00864447 | 23.29029 | 0.102503 | 38.58 |
| 600873 | 2015 | -0.83 | 1.17 | 0.006384 | 0.00004075 | 23.62301 | 0.052053 | 27.48 |
| 600873 | 2015 | -0.83 | 1.17 | 0.006384 | 0.00004075 | 23.62301 | 0.052053 | 27.48 |
| 600873 | 2015 | -0.83 | 1.17 | 0.006384 | 0.00004075 | 23.62301 | 0.052053 | 27.48 |
| 600873 | 2015 | -0.83 | 1.17 | 0.006384 | 0.00004075 | 23.62301 | 0.052053 | 27.48 |
| 600873 | 2015 | -0.83 | 1.17 | 0.006384 | 0.00004075 | 23.62301 | 0.052053 | 27.48 |
| 600873 | 2015 | -0.83 | 1.17 | 0.006384 | 0.00004075 | 23.62301 | 0.052053 | 27.48 |
| 600873 | 2015 | -0.83 | 1.17 | 0.006384 | 0.00004075 | 23.62301 | 0.052053 | 27.48 |
| 600873 | 2015 | -0.83 | 1.17 | 0.006384 | 0.00004075 | 23.62301 | 0.052053 | 27.48 |
| 600873 | 2015 | -0.83 | 1.17 | 0.006384 | 0.00004075 | 23.62301 | 0.052053 | 27.48 |
| 600873 | 2015 | -0.83 | 1.17 | 0.006384 | 0.00004075 | 23.62301 | 0.052053 | 27.48 |
| 600873 | 2015 | -0.83 | 1.17 | 0.006384 | 0.00004075 | 23.62301 | 0.052053 | 27.48 |
| 600873 | 2015 | -0.83 | 1.17 | 0.006384 | 0.00004075 | 23.62301 | 0.052053 | 27.48 |
| 600873 | 2015 | -0.83 | 1.17 | 0.006384 | 0.00004075 | 23.62301 | 0.052053 | 27.48 |
| 2495   | 2015 | -0.57 | 0.09 | 1.413676 | 1.9984799  | 20.88322 | 0.036332 | 17.15 |
| 2348   | 2015 | -0.64 | 0.09 | 1.413676 | 1.9984799  | 20.93984 | 0.045883 | 19.76 |
| 600518 | 2015 | -0.3  | 0.09 | 1.413676 | 1.9984799  | 24.36362 | 0.146321 | 30.42 |
| 2348   | 2015 | -0.64 | 0.09 | 1.413676 | 1.9984799  | 20.94456 | 0.045883 | 19.76 |
| 2031   | 2015 | -0.21 | 0.09 | 1.413676 | 1.9984799  | 22.19783 | 0.042047 | 18.24 |
| 600518 | 2015 | 0.03  | 0.09 | 1.413676 | 1.9984799  | 24.36362 | 0.146321 | 30.42 |
| 600518 | 2015 | 0.03  | 0.09 | 1.413676 | 1.9984799  | 24.36362 | 0.146321 | 30.42 |
| 600518 | 2015 | 0.03  | 0.09 | 1.413676 | 1.9984799  | 24.36362 | 0.146321 | 30.42 |
| 600518 | 2015 | -0.24 | 0.09 | 1.413676 | 1.9984799  | 24.36362 | 0.146321 | 30.42 |
| 2495   | 2015 | -0.57 | 0.09 | 1.413676 | 1.9984799  | 20.86249 | 0.036332 | 17.15 |
| 600518 | 2015 | -0.88 | 0.09 | 1.413676 | 1.9984799  | 24.36362 | 0.146321 | 30.42 |
| 600518 | 2015 | 0.03  | 0.09 | 1.413676 | 1.9984799  | 24.36362 | 0.146321 | 30.42 |
| 600518 | 2015 | -0.11 | 0.09 | 1.413676 | 1.9984799  | 24.30548 | 0.146321 | 30.42 |
| 2031   | 2015 | -0.05 | 0.09 | 1.413676 | 1.9984799  | 22.19783 | 0.042047 | 18.24 |
| 2031   | 2015 | -0.31 | 0.09 | 1.413676 | 1.9984799  | 22.14605 | 0.042047 | 18.24 |
| 2031   | 2015 | -0.05 | 0.09 | 1.413676 | 1.9984799  | 22.19783 | 0.042047 | 18.24 |
| 600518 | 2015 | -0.88 | 0.09 | 1.413676 | 1.9984799  | 24.36362 | 0.146321 | 30.42 |
| 2348   | 2015 | -0.64 | 0.09 | 1.413676 | 1.9984799  | 20.93984 | 0.045883 | 19.76 |
| 600518 | 2015 | -0.5  | 0.09 | 1.413676 | 1.9984799  | 24.36362 | 0.146321 | 30.42 |
| 2495   | 2015 | -0.57 | 0.09 | 1.413676 | 1.9984799  | 20.86249 | 0.036332 | 17.15 |
| 600518 | 2015 | -0.5  | 0.09 | 1.413676 | 1.9984799  | 24.36362 | 0.146321 | 30.42 |
| 2031   | 2015 | -0.21 | 0.09 | 1.413676 | 1.9984799  | 22.19783 | 0.042047 | 18.24 |
| 600518 | 2015 | 0.03  | 0.09 | 1.413676 | 1.9984799  | 24.36362 | 0.146321 | 30.42 |
| 2007   | 2015 | 0.847 | 0.07 | 0.510826 | 0.26094302 | 22.11492 | 0.14983  | 17.84 |
| 2007   | 2015 | -0.15 | 0.07 | 0.510826 | 0.26094302 | 22.11492 | 0.14983  | 17.84 |
| 949    | 2015 | -0.64 | 0.07 | 0.510826 | 0.26094302 | 22.32832 | 0.054923 | 33.35 |
| 2007   | 2015 | -0.48 | 0.07 | 0.510826 | 0.26094302 | 21.78902 | 0.14983  | 17.84 |
| 2007   | 2015 | 0.847 | 0.07 | 0.510826 | 0.26094302 | 22.11492 | 0.14983  | 17.84 |
| 2007   | 2015 | 0.847 | 0.07 | 0.510826 | 0.26094302 | 22.11492 | 0.14983  | 17.84 |
| 949    | 2015 | -0.64 | 0.07 | 0.510826 | 0.26094302 | 22.32832 | 0.054923 | 33.35 |
| 949    | 2015 | -0.64 | 0.07 | 0.510826 | 0.26094302 | 22.32897 | 0.054923 | 33.35 |
| 2007   | 2015 | 0.052 | 0.07 | 0.510826 | 0.26094302 | 22.11492 | 0.14983  | 17.84 |

|        |      |       |      |          |           |          |          |         |
|--------|------|-------|------|----------|-----------|----------|----------|---------|
| 2471   | 2015 | -0.05 | 0.09 | 1.269491 | 1.6116084 | 22.21401 | 0.042686 | 37.08   |
| 581    | 2015 | -0.42 | 0.09 | 1.269491 | 1.6116084 | 23.47719 | 0.127137 | 20.22   |
| 700    | 2015 | -0.72 | 0.09 | 1.269491 | 1.6116084 | 22.24009 | 0.12287  | 34.04   |
| 2445   | 2015 | 0.669 | 0.09 | 1.269491 | 1.6116084 | 22.01943 | 0.064313 | 33.55   |
| 890    | 2015 | -0.61 | 0.09 | 1.269491 | 1.6116084 | 21.81493 | 0.010931 | 21.07   |
| 890    | 2015 | -0.93 | 0.09 | 1.269491 | 1.6116084 | 21.81493 | 0.010931 | 21.07   |
| 600398 | 2015 | -0.97 | 0.09 | 1.269491 | 1.6116084 | 23.87778 | 0.302158 | 39.31   |
| 300279 | 2015 | -0.63 | 0.09 | 1.269491 | 1.6116084 | 21.01268 | 0.04047  | 25.97   |
| 2471   | 2015 | -0.31 | 0.09 | 1.269491 | 1.6116084 | 22.85389 | 0.042686 | 37.08   |
| 581    | 2015 | 0.116 | 0.09 | 1.269491 | 1.6116084 | 23.47719 | 0.127137 | 20.22   |
| 2610   | 2015 | -0.55 | 0.09 | 1.269491 | 1.6116084 | 23.22309 | 0.047617 | 18.76   |
| 738    | 2015 | -0.08 | 0.09 | 1.269491 | 1.6116084 | 22.66179 | 0.0397   | 23.34   |
| 600398 | 2015 | -0.97 | 0.09 | 1.269491 | 1.6116084 | 23.87778 | 0.302158 | 39.31   |
| 2471   | 2015 | 0.583 | 0.09 | 1.269491 | 1.6116084 | 22.85389 | 0.042686 | 37.08   |
| 2009   | 2015 | -0.33 | 0.09 | 1.269491 | 1.6116084 | 22.24754 | 0.060211 | 15.53   |
| 2445   | 2015 | 0.64  | 0.09 | 1.269491 | 1.6116084 | 22.01943 | 0.064313 | 33.55   |
| 601218 | 2015 | -0.09 | 0.09 | 1.269491 | 1.6116084 | 22.09263 | 0.051535 | 36.7916 |
| 600584 | 2015 | 0.153 | 0.09 | 1.269491 | 1.6116084 | 23.96424 | -0.02368 | 18.37   |
| 2645   | 2015 | -0.47 | 0.09 | 1.269491 | 1.6116084 | 21.27992 | -0.008   | 49.69   |
| 600481 | 2015 | -0.31 | 0.09 | 1.269491 | 1.6116084 | 22.144   | 0.149683 | 34.33   |
| 738    | 2015 | -0.18 | 0.09 | 1.269491 | 1.6116084 | 22.66179 | 0.0397   | 23.34   |
| 600481 | 2015 | -0.31 | 0.09 | 1.269491 | 1.6116084 | 22.21968 | 0.149683 | 34.33   |
| 600220 | 2015 | -0.39 | 0.09 | 1.269491 | 1.6116084 | 22.14809 | 0.061892 | 8.448   |
| 2455   | 2015 | 0.08  | 0.09 | 1.269491 | 1.6116084 | 21.36082 | 0.074011 | 34.66   |
| 2009   | 2015 | -0.38 | 0.09 | 1.269491 | 1.6116084 | 22.24754 | 0.060211 | 15.53   |
| 2692   | 2015 | 0.017 | 0.09 | 1.269491 | 1.6116084 | 21.89399 | 0.097954 | 29.11   |
| 600584 | 2015 | -0.37 | 0.09 | 1.269491 | 1.6116084 | 23.96424 | -0.02368 | 18.37   |
| 600400 | 2015 | -0.84 | 0.09 | 1.269491 | 1.6116084 | 22.63357 | 0.034976 | 57.82   |
| 2009   | 2015 | -0.57 | 0.09 | 1.269491 | 1.6116084 | 22.24754 | 0.060211 | 15.53   |
| 700    | 2015 | -0.43 | 0.09 | 1.269491 | 1.6116084 | 22.24009 | 0.12287  | 34.04   |
| 2685   | 2015 | -0.13 | 0.09 | 1.269491 | 1.6116084 | 20.75907 | 0.026491 | 39      |
| 600481 | 2015 | -0.44 | 0.09 | 1.269491 | 1.6116084 | 22.21968 | 0.149683 | 34.33   |
| 2471   | 2015 | -0.51 | 0.09 | 1.269491 | 1.6116084 | 22.85389 | 0.042686 | 37.08   |
| 2471   | 2015 | -0.35 | 0.09 | 1.269491 | 1.6116084 | 22.85389 | 0.042686 | 37.08   |
| 2610   | 2015 | -0.55 | 0.09 | 1.269491 | 1.6116084 | 22.34591 | 0.047617 | 18.76   |
| 300135 | 2015 | -0.23 | 0.09 | 1.269491 | 1.6116084 | 21.56978 | 0.020197 | 30.08   |
| 300320 | 2015 | -0.18 | 0.09 | 1.269491 | 1.6116084 | 20.80871 | 0.089133 | 19.66   |
| 738    | 2015 | 0.533 | 0.09 | 1.269491 | 1.6116084 | 22.66179 | 0.0397   | 23.34   |
| 600398 | 2015 | -0.97 | 0.09 | 1.269491 | 1.6116084 | 23.87778 | 0.302158 | 39.31   |
| 2685   | 2015 | -0.13 | 0.09 | 1.269491 | 1.6116084 | 20.89996 | 0.026491 | 39      |
| 700    | 2015 | -0.72 | 0.09 | 1.269491 | 1.6116084 | 22.24009 | 0.12287  | 34.04   |
| 738    | 2015 | -0.65 | 0.09 | 1.269491 | 1.6116084 | 22.66179 | 0.0397   | 23.34   |
| 2445   | 2015 | 0.664 | 0.09 | 1.269491 | 1.6116084 | 21.86487 | 0.064313 | 33.55   |
| 2471   | 2015 | -0.29 | 0.09 | 1.269491 | 1.6116084 | 22.85389 | 0.042686 | 37.08   |
| 2645   | 2015 | -0.47 | 0.09 | 1.269491 | 1.6116084 | 21.19958 | -0.008   | 49.69   |
| 738    | 2015 | -0.18 | 0.09 | 1.269491 | 1.6116084 | 22.66179 | 0.0397   | 23.34   |
| 700    | 2015 | -0.72 | 0.09 | 1.269491 | 1.6116084 | 21.99123 | 0.12287  | 34.04   |
| 600584 | 2015 | 0.153 | 0.09 | 1.269491 | 1.6116084 | 23.96424 | -0.02368 | 18.37   |
| 300279 | 2015 | -0.63 | 0.09 | 1.269491 | 1.6116084 | 21.01268 | 0.04047  | 25.97   |
| 600475 | 2015 | -0.51 | 0.09 | 1.269491 | 1.6116084 | 22.34619 | 0.099738 | 45.12   |
| 600475 | 2015 | -0.02 | 0.09 | 1.269491 | 1.6116084 | 22.34619 | 0.099738 | 45.12   |
| 890    | 2015 | -0.8  | 0.09 | 1.269491 | 1.6116084 | 21.52177 | 0.010931 | 21.07   |
| 700    | 2015 | -0.72 | 0.09 | 1.269491 | 1.6116084 | 22.24009 | 0.12287  | 34.04   |
| 2471   | 2015 | -0.51 | 0.09 | 1.269491 | 1.6116084 | 22.85389 | 0.042686 | 37.08   |

|        |      |       |      |          |           |          |          |         |
|--------|------|-------|------|----------|-----------|----------|----------|---------|
| 581    | 2015 | -0.05 | 0.09 | 1.269491 | 1.6116084 | 23.47719 | 0.127137 | 20.22   |
| 700    | 2015 | -0.72 | 0.09 | 1.269491 | 1.6116084 | 22.24009 | 0.12287  | 34.04   |
| 600584 | 2015 | 0.638 | 0.09 | 1.269491 | 1.6116084 | 23.96424 | -0.02368 | 18.37   |
| 601218 | 2015 | -0.09 | 0.09 | 1.269491 | 1.6116084 | 22.09263 | 0.051535 | 36.7916 |
| 300135 | 2015 | -0.34 | 0.09 | 1.269491 | 1.6116084 | 21.75065 | 0.020197 | 30.08   |
| 738    | 2015 | -0.18 | 0.09 | 1.269491 | 1.6116084 | 22.66179 | 0.0397   | 23.34   |
| 600481 | 2015 | -0.35 | 0.09 | 1.269491 | 1.6116084 | 22.21968 | 0.149683 | 34.33   |
| 600370 | 2015 | -0.39 | 0.09 | 1.269491 | 1.6116084 | 21.20302 | 0.023648 | 50.33   |
| 600398 | 2015 | -0.36 | 0.09 | 1.269491 | 1.6116084 | 23.58433 | 0.302158 | 39.31   |
| 2610   | 2015 | -0.55 | 0.09 | 1.269491 | 1.6116084 | 23.22309 | 0.047617 | 18.76   |
| 600667 | 2015 | -0.59 | 0.09 | 1.269491 | 1.6116084 | 22.45071 | 0.060899 | 32.79   |
| 738    | 2015 | 0.073 | 0.09 | 1.269491 | 1.6116084 | 22.66179 | 0.0397   | 23.34   |
| 601218 | 2015 | -0.09 | 0.09 | 1.269491 | 1.6116084 | 22.04683 | 0.051535 | 36.7916 |
| 600481 | 2015 | -0.28 | 0.09 | 1.269491 | 1.6116084 | 22.21968 | 0.149683 | 34.33   |
| 2471   | 2015 | 0.149 | 0.09 | 1.269491 | 1.6116084 | 22.85389 | 0.042686 | 37.08   |
| 600667 | 2015 | -0.3  | 0.09 | 1.269491 | 1.6116084 | 22.45071 | 0.060899 | 32.79   |
| 600667 | 2015 | -0.3  | 0.09 | 1.269491 | 1.6116084 | 22.45071 | 0.060899 | 32.79   |
| 600584 | 2015 | 0.638 | 0.09 | 1.269491 | 1.6116084 | 23.04351 | -0.02368 | 18.37   |
| 2540   | 2015 | -0.12 | 0.09 | 1.269491 | 1.6116084 | 21.85005 | 0.088976 | 42.49   |
| 600475 | 2015 | 0.017 | 0.09 | 1.269491 | 1.6116084 | 22.34619 | 0.099738 | 45.12   |
| 300031 | 2015 | 0.45  | 0.09 | 1.269491 | 1.6116084 | 20.72604 | 0.076472 | 30.074  |
| 300320 | 2015 | -0.18 | 0.09 | 1.269491 | 1.6116084 | 20.80871 | 0.089133 | 19.66   |
| 2540   | 2015 | -0.29 | 0.09 | 1.269491 | 1.6116084 | 21.85005 | 0.088976 | 42.49   |
| 2645   | 2015 | -0.47 | 0.09 | 1.269491 | 1.6116084 | 21.27992 | -0.008   | 49.69   |
| 600475 | 2015 | 0.017 | 0.09 | 1.269491 | 1.6116084 | 22.34619 | 0.099738 | 45.12   |
| 2692   | 2015 | -0.46 | 0.09 | 1.269491 | 1.6116084 | 21.89399 | 0.097954 | 29.11   |
| 2692   | 2015 | -0.08 | 0.09 | 1.269491 | 1.6116084 | 21.89399 | 0.097954 | 29.11   |
| 2692   | 2015 | -0.07 | 0.09 | 1.269491 | 1.6116084 | 21.89399 | 0.097954 | 29.11   |
| 2692   | 2015 | -0.02 | 0.09 | 1.269491 | 1.6116084 | 21.89399 | 0.097954 | 29.11   |
| 300337 | 2015 | 0.235 | 0.09 | 1.269491 | 1.6116084 | 21.61823 | -0.12292 | 42.34   |
| 581    | 2015 | -0.12 | 0.09 | 1.269491 | 1.6116084 | 23.47719 | 0.127137 | 20.22   |
| 600398 | 2015 | -0.97 | 0.09 | 1.269491 | 1.6116084 | 23.87778 | 0.302158 | 39.31   |
| 300320 | 2015 | -0.18 | 0.09 | 1.269491 | 1.6116084 | 20.74635 | 0.089133 | 19.66   |
| 2009   | 2015 | -0.24 | 0.09 | 1.269491 | 1.6116084 | 22.24754 | 0.060211 | 15.53   |
| 600220 | 2015 | -0.39 | 0.09 | 1.269491 | 1.6116084 | 22.16849 | 0.061892 | 8.448   |
| 700    | 2015 | -0.55 | 0.09 | 1.269491 | 1.6116084 | 22.24009 | 0.12287  | 34.04   |
| 2610   | 2015 | -0.55 | 0.09 | 1.269491 | 1.6116084 | 23.22309 | 0.047617 | 18.76   |
| 300279 | 2015 | -0.63 | 0.09 | 1.269491 | 1.6116084 | 21.01268 | 0.04047  | 25.97   |
| 738    | 2015 | -0.18 | 0.09 | 1.269491 | 1.6116084 | 22.66179 | 0.0397   | 23.34   |
| 600584 | 2015 | 0.309 | 0.09 | 1.269491 | 1.6116084 | 23.96424 | -0.02368 | 18.37   |
| 738    | 2015 | -0.05 | 0.09 | 1.269491 | 1.6116084 | 22.66179 | 0.0397   | 23.34   |
| 581    | 2015 | 0.333 | 0.09 | 1.269491 | 1.6116084 | 23.16178 | 0.127137 | 20.22   |
| 700    | 2015 | -0.62 | 0.09 | 1.269491 | 1.6116084 | 22.24009 | 0.12287  | 34.04   |
| 890    | 2015 | -0.61 | 0.09 | 1.269491 | 1.6116084 | 21.81493 | 0.010931 | 21.07   |
| 2610   | 2015 | -0.54 | 0.09 | 1.269491 | 1.6116084 | 23.22309 | 0.047617 | 18.76   |
| 300031 | 2015 | 0.564 | 0.09 | 1.269491 | 1.6116084 | 20.72604 | 0.076472 | 30.074  |
| 890    | 2015 | -0.45 | 0.09 | 1.269491 | 1.6116084 | 21.81493 | 0.010931 | 21.07   |
| 2471   | 2015 | -0.1  | 0.09 | 1.269491 | 1.6116084 | 22.85389 | 0.042686 | 37.08   |
| 2009   | 2015 | -0.65 | 0.09 | 1.269491 | 1.6116084 | 22.24754 | 0.060211 | 15.53   |
| 300031 | 2015 | 0.103 | 0.09 | 1.269491 | 1.6116084 | 20.72604 | 0.076472 | 30.074  |
| 300385 | 2015 | 0.091 | 0.09 | 1.269491 | 1.6116084 | 21.06426 | 0.0936   | 39.24   |
| 2445   | 2015 | 0.669 | 0.09 | 1.269491 | 1.6116084 | 22.01943 | 0.064313 | 33.55   |
| 2685   | 2015 | -0.13 | 0.09 | 1.269491 | 1.6116084 | 20.89996 | 0.026491 | 39      |
| 581    | 2015 | -0.05 | 0.09 | 1.269491 | 1.6116084 | 23.47719 | 0.127137 | 20.22   |

|        |      |       |      |          |           |          |          |        |
|--------|------|-------|------|----------|-----------|----------|----------|--------|
| 2471   | 2015 | 0.812 | 0.09 | 1.269491 | 1.6116084 | 22.85389 | 0.042686 | 37.08  |
| 2009   | 2015 | -0.33 | 0.09 | 1.269491 | 1.6116084 | 22.24754 | 0.060211 | 15.53  |
| 300135 | 2015 | -0.34 | 0.09 | 1.269491 | 1.6116084 | 21.75065 | 0.020197 | 30.08  |
| 738    | 2015 | -0.18 | 0.09 | 1.269491 | 1.6116084 | 22.66179 | 0.0397   | 23.34  |
| 2471   | 2015 | 0.315 | 0.09 | 1.269491 | 1.6116084 | 22.85389 | 0.042686 | 37.08  |
| 700    | 2015 | -0.72 | 0.09 | 1.269491 | 1.6116084 | 22.24009 | 0.12287  | 34.04  |
| 2009   | 2015 | -0.33 | 0.09 | 1.269491 | 1.6116084 | 22.24754 | 0.060211 | 15.53  |
| 300031 | 2015 | 0.437 | 0.09 | 1.269491 | 1.6116084 | 20.72604 | 0.076472 | 30.074 |
| 600584 | 2015 | 0.153 | 0.09 | 1.269491 | 1.6116084 | 23.96424 | -0.02368 | 18.37  |
| 2540   | 2015 | -0.29 | 0.09 | 1.269491 | 1.6116084 | 21.85005 | 0.088976 | 42.49  |
| 581    | 2015 | 0.221 | 0.09 | 1.269491 | 1.6116084 | 23.47719 | 0.127137 | 20.22  |
| 2471   | 2015 | -0.29 | 0.09 | 1.269491 | 1.6116084 | 22.85389 | 0.042686 | 37.08  |
| 2455   | 2015 | 0.088 | 0.09 | 1.269491 | 1.6116084 | 20.56617 | 0.074011 | 34.66  |
| 581    | 2015 | -0.42 | 0.09 | 1.269491 | 1.6116084 | 23.47719 | 0.127137 | 20.22  |
| 603988 | 2015 | 0.688 | 0.09 | 1.269491 | 1.6116084 | 20.50814 | 0.067275 | 30     |
| 2455   | 2015 | 0.111 | 0.09 | 1.269491 | 1.6116084 | 21.36082 | 0.074011 | 34.66  |
| 2471   | 2015 | -0.03 | 0.09 | 1.269491 | 1.6116084 | 22.85389 | 0.042686 | 37.08  |
| 2009   | 2015 | -0.33 | 0.09 | 1.269491 | 1.6116084 | 22.24754 | 0.060211 | 15.53  |
| 581    | 2015 | 0.073 | 0.09 | 1.269491 | 1.6116084 | 23.47719 | 0.127137 | 20.22  |
| 581    | 2015 | 0.515 | 0.09 | 1.269491 | 1.6116084 | 23.47719 | 0.127137 | 20.22  |
| 600398 | 2015 | -0.66 | 0.09 | 1.269491 | 1.6116084 | 23.87778 | 0.302158 | 39.31  |
| 2009   | 2015 | -0.65 | 0.09 | 1.269491 | 1.6116084 | 22.24754 | 0.060211 | 15.53  |
| 2009   | 2015 | -0.33 | 0.09 | 1.269491 | 1.6116084 | 22.24754 | 0.060211 | 15.53  |
| 2692   | 2015 | 0.046 | 0.09 | 1.269491 | 1.6116084 | 21.66948 | 0.097954 | 29.11  |
| 2009   | 2015 | -0.33 | 0.09 | 1.269491 | 1.6116084 | 22.24754 | 0.060211 | 15.53  |
| 300135 | 2015 | -0.3  | 0.09 | 1.269491 | 1.6116084 | 21.75065 | 0.020197 | 30.08  |
| 2610   | 2015 | -0.54 | 0.09 | 1.269491 | 1.6116084 | 23.22309 | 0.047617 | 18.76  |
| 600398 | 2015 | -0.97 | 0.09 | 1.269491 | 1.6116084 | 23.87778 | 0.302158 | 39.31  |
| 2009   | 2015 | -0.33 | 0.09 | 1.269491 | 1.6116084 | 22.24754 | 0.060211 | 15.53  |
| 300135 | 2015 | -0.3  | 0.09 | 1.269491 | 1.6116084 | 21.75065 | 0.020197 | 30.08  |
| 2009   | 2015 | -0.33 | 0.09 | 1.269491 | 1.6116084 | 22.24754 | 0.060211 | 15.53  |
| 600667 | 2015 | -0.3  | 0.09 | 1.269491 | 1.6116084 | 21.6692  | 0.060899 | 32.79  |
| 700    | 2015 | -0.72 | 0.09 | 1.269491 | 1.6116084 | 22.24009 | 0.12287  | 34.04  |
| 300337 | 2015 | 0.235 | 0.09 | 1.269491 | 1.6116084 | 21.61823 | -0.12292 | 42.34  |
| 300385 | 2015 | 0.091 | 0.09 | 1.269491 | 1.6116084 | 21.06426 | 0.0936   | 39.24  |
| 2009   | 2015 | -0.33 | 0.09 | 1.269491 | 1.6116084 | 22.24754 | 0.060211 | 15.53  |
| 2692   | 2015 | -0.46 | 0.09 | 1.269491 | 1.6116084 | 21.89399 | 0.097954 | 29.11  |
| 600220 | 2015 | -0.39 | 0.09 | 1.269491 | 1.6116084 | 22.16849 | 0.061892 | 8.448  |
| 300279 | 2015 | -0.63 | 0.09 | 1.269491 | 1.6116084 | 20.95637 | 0.04047  | 25.97  |
| 738    | 2015 | 0.533 | 0.09 | 1.269491 | 1.6116084 | 22.14683 | 0.0397   | 23.34  |
| 600667 | 2015 | -0.29 | 0.09 | 1.269491 | 1.6116084 | 22.45071 | 0.060899 | 32.79  |
| 601028 | 2015 | -0.41 | 0.09 | 1.269491 | 1.6116084 | 21.90483 | 0.048341 | 24.06  |
| 738    | 2015 | 0.074 | 0.09 | 1.269491 | 1.6116084 | 22.66179 | 0.0397   | 23.34  |
| 600398 | 2015 | -0.66 | 0.09 | 1.269491 | 1.6116084 | 23.87778 | 0.302158 | 39.31  |
| 603988 | 2015 | 0.688 | 0.09 | 1.269491 | 1.6116084 | 20.50814 | 0.067275 | 30     |
| 300279 | 2015 | -0.63 | 0.09 | 1.269491 | 1.6116084 | 21.01268 | 0.04047  | 25.97  |
| 603988 | 2015 | 0.688 | 0.09 | 1.269491 | 1.6116084 | 20.50814 | 0.067275 | 30     |
| 600481 | 2015 | 0.203 | 0.09 | 1.269491 | 1.6116084 | 22.21968 | 0.149683 | 34.33  |
| 2610   | 2015 | -0.55 | 0.09 | 1.269491 | 1.6116084 | 23.22309 | 0.047617 | 18.76  |
| 600667 | 2015 | -0.3  | 0.09 | 1.269491 | 1.6116084 | 22.45071 | 0.060899 | 32.79  |
| 2610   | 2015 | -0.55 | 0.09 | 1.269491 | 1.6116084 | 23.22309 | 0.047617 | 18.76  |
| 600481 | 2015 | 0.203 | 0.09 | 1.269491 | 1.6116084 | 22.21968 | 0.149683 | 34.33  |
| 581    | 2015 | -0.18 | 0.09 | 1.269491 | 1.6116084 | 23.47719 | 0.127137 | 20.22  |
| 600584 | 2015 | 0.011 | 0.09 | 1.269491 | 1.6116084 | 23.96424 | -0.02368 | 18.37  |

|        |      |       |      |          |           |          |          |       |
|--------|------|-------|------|----------|-----------|----------|----------|-------|
| 300337 | 2015 | 0.196 | 0.09 | 1.269491 | 1.6116084 | 21.61823 | -0.12292 | 42.34 |
| 581    | 2015 | -0.17 | 0.09 | 1.269491 | 1.6116084 | 23.47719 | 0.127137 | 20.22 |
| 300135 | 2015 | -0.34 | 0.09 | 1.269491 | 1.6116084 | 21.75065 | 0.020197 | 30.08 |
| 300135 | 2015 | -0.34 | 0.09 | 1.269491 | 1.6116084 | 21.75065 | 0.020197 | 30.08 |
| 600481 | 2015 | -0.24 | 0.09 | 1.269491 | 1.6116084 | 22.21968 | 0.149683 | 34.33 |
| 581    | 2015 | 0.184 | 0.09 | 1.269491 | 1.6116084 | 23.47719 | 0.127137 | 20.22 |
| 2009   | 2015 | -0.5  | 0.09 | 1.269491 | 1.6116084 | 22.24754 | 0.060211 | 15.53 |
| 300135 | 2015 | -0.34 | 0.09 | 1.269491 | 1.6116084 | 21.75065 | 0.020197 | 30.08 |
| 600400 | 2015 | -0.84 | 0.09 | 1.269491 | 1.6116084 | 21.83899 | 0.034976 | 57.82 |
| 600475 | 2015 | -0.02 | 0.09 | 1.269491 | 1.6116084 | 22.34619 | 0.099738 | 45.12 |
| 890    | 2015 | -0.93 | 0.09 | 1.269491 | 1.6116084 | 21.81493 | 0.010931 | 21.07 |
| 2395   | 2015 | 0.107 | 0.09 | 1.269491 | 1.6116084 | 20.87901 | 0.034485 | 64.73 |
| 600475 | 2015 | -0.02 | 0.09 | 1.269491 | 1.6116084 | 21.76701 | 0.099738 | 45.12 |
| 600475 | 2015 | -0.02 | 0.09 | 1.269491 | 1.6116084 | 22.34619 | 0.099738 | 45.12 |
| 300385 | 2015 | -0.02 | 0.09 | 1.269491 | 1.6116084 | 21.06426 | 0.0936   | 39.24 |
| 600370 | 2015 | -0.26 | 0.09 | 1.269491 | 1.6116084 | 20.83135 | 0.023648 | 50.33 |
| 2395   | 2015 | 0.107 | 0.09 | 1.269491 | 1.6116084 | 20.87901 | 0.034485 | 64.73 |
| 2471   | 2015 | -0.51 | 0.09 | 1.269491 | 1.6116084 | 22.85389 | 0.042686 | 37.08 |
| 600584 | 2015 | 0.011 | 0.09 | 1.269491 | 1.6116084 | 23.96424 | -0.02368 | 18.37 |
| 600400 | 2015 | -0.84 | 0.09 | 1.269491 | 1.6116084 | 21.83899 | 0.034976 | 57.82 |
| 600370 | 2015 | -0.39 | 0.09 | 1.269491 | 1.6116084 | 21.20302 | 0.023648 | 50.33 |
| 601028 | 2015 | -0.34 | 0.09 | 1.269491 | 1.6116084 | 21.90483 | 0.048341 | 24.06 |
| 2445   | 2015 | 0.64  | 0.09 | 1.269491 | 1.6116084 | 22.01943 | 0.064313 | 33.55 |
| 2455   | 2015 | 0.08  | 0.09 | 1.269491 | 1.6116084 | 21.36082 | 0.074011 | 34.66 |
| 890    | 2015 | -0.57 | 0.09 | 1.269491 | 1.6116084 | 21.81493 | 0.010931 | 21.07 |
| 2395   | 2015 | 0.108 | 0.09 | 1.269491 | 1.6116084 | 20.87901 | 0.034485 | 64.73 |
| 601028 | 2015 | -0.7  | 0.09 | 1.269491 | 1.6116084 | 21.90483 | 0.048341 | 24.06 |
| 2455   | 2015 | 0.08  | 0.09 | 1.269491 | 1.6116084 | 21.36082 | 0.074011 | 34.66 |
| 2540   | 2015 | 0.392 | 0.09 | 1.269491 | 1.6116084 | 21.70347 | 0.088976 | 42.49 |
| 300135 | 2015 | -0.34 | 0.09 | 1.269491 | 1.6116084 | 21.75065 | 0.020197 | 30.08 |
| 890    | 2015 | -0.6  | 0.09 | 1.269491 | 1.6116084 | 21.81493 | 0.010931 | 21.07 |
| 300337 | 2015 | -0.66 | 0.09 | 1.269491 | 1.6116084 | 21.61941 | -0.12292 | 42.34 |
| 601028 | 2015 | -0.34 | 0.09 | 1.269491 | 1.6116084 | 21.87038 | 0.048341 | 24.06 |
| 600370 | 2015 | -0.36 | 0.09 | 1.269491 | 1.6116084 | 21.20302 | 0.023648 | 50.33 |
| 2471   | 2015 | 0.812 | 0.09 | 1.269491 | 1.6116084 | 22.85389 | 0.042686 | 37.08 |
| 600398 | 2015 | -0.97 | 0.09 | 1.269491 | 1.6116084 | 23.87778 | 0.302158 | 39.31 |
| 600584 | 2015 | 0.033 | 0.09 | 1.269491 | 1.6116084 | 23.96424 | -0.02368 | 18.37 |
| 2009   | 2015 | -0.65 | 0.09 | 1.269491 | 1.6116084 | 22.24754 | 0.060211 | 15.53 |
| 2645   | 2015 | -0.47 | 0.09 | 1.269491 | 1.6116084 | 21.27992 | -0.008   | 49.69 |
| 2471   | 2015 | 0.001 | 0.09 | 1.269491 | 1.6116084 | 22.85389 | 0.042686 | 37.08 |
| 2395   | 2015 | 0.108 | 0.09 | 1.269491 | 1.6116084 | 20.69036 | 0.034485 | 64.73 |
| 300385 | 2015 | -0.05 | 0.09 | 1.269491 | 1.6116084 | 21.06426 | 0.0936   | 39.24 |
| 2540   | 2015 | 0.068 | 0.09 | 1.269491 | 1.6116084 | 21.85005 | 0.088976 | 42.49 |
| 300337 | 2015 | -0.66 | 0.09 | 1.269491 | 1.6116084 | 21.61823 | -0.12292 | 42.34 |
| 2395   | 2015 | 0.107 | 0.09 | 1.269491 | 1.6116084 | 20.87901 | 0.034485 | 64.73 |
| 581    | 2015 | -0.42 | 0.09 | 1.269491 | 1.6116084 | 23.47719 | 0.127137 | 20.22 |
| 600220 | 2015 | -0.39 | 0.09 | 1.269491 | 1.6116084 | 22.16849 | 0.061892 | 8.448 |
| 2471   | 2015 | 0.812 | 0.09 | 1.269491 | 1.6116084 | 22.85389 | 0.042686 | 37.08 |
| 581    | 2015 | -0.42 | 0.09 | 1.269491 | 1.6116084 | 23.47719 | 0.127137 | 20.22 |
| 600220 | 2015 | -0.39 | 0.09 | 1.269491 | 1.6116084 | 22.16849 | 0.061892 | 8.448 |
| 601028 | 2015 | -0.7  | 0.09 | 1.269491 | 1.6116084 | 21.90483 | 0.048341 | 24.06 |
| 2540   | 2015 | 0.146 | 0.09 | 1.269491 | 1.6116084 | 21.85005 | 0.088976 | 42.49 |
| 600584 | 2015 | 0.062 | 0.09 | 1.269491 | 1.6116084 | 23.96424 | -0.02368 | 18.37 |
| 600481 | 2015 | 0.203 | 0.09 | 1.269491 | 1.6116084 | 22.21968 | 0.149683 | 34.33 |



|        |      |       |      |          |           |          |          |        |
|--------|------|-------|------|----------|-----------|----------|----------|--------|
| 2471   | 2015 | 0.149 | 0.09 | 1.269491 | 1.6116084 | 22.85389 | 0.042686 | 37.08  |
| 581    | 2015 | -0.27 | 0.09 | 1.269491 | 1.6116084 | 23.47719 | 0.127137 | 20.22  |
| 600584 | 2015 | -0.37 | 0.09 | 1.269491 | 1.6116084 | 23.96424 | -0.02368 | 18.37  |
| 300031 | 2015 | 0.295 | 0.09 | 1.269491 | 1.6116084 | 20.76383 | 0.076472 | 30.074 |
| 600370 | 2015 | -0.26 | 0.09 | 1.269491 | 1.6116084 | 21.20302 | 0.023648 | 50.33  |
| 600481 | 2015 | 0.203 | 0.09 | 1.269491 | 1.6116084 | 22.21968 | 0.149683 | 34.33  |
| 2009   | 2015 | -0.33 | 0.09 | 1.269491 | 1.6116084 | 21.7738  | 0.060211 | 15.53  |
| 300385 | 2015 | -0.05 | 0.09 | 1.269491 | 1.6116084 | 20.89233 | 0.0936   | 39.24  |
| 2455   | 2015 | 0.093 | 0.09 | 1.269491 | 1.6116084 | 21.36082 | 0.074011 | 34.66  |
| 300031 | 2015 | 0.103 | 0.09 | 1.269491 | 1.6116084 | 20.76383 | 0.076472 | 30.074 |
| 600475 | 2015 | -0.51 | 0.09 | 1.269491 | 1.6116084 | 22.34619 | 0.099738 | 45.12  |
| 2610   | 2015 | -0.55 | 0.09 | 1.269491 | 1.6116084 | 23.22309 | 0.047617 | 18.76  |
| 2645   | 2015 | -0.47 | 0.09 | 1.269491 | 1.6116084 | 21.27992 | -0.008   | 49.69  |
| 2610   | 2015 | -0.54 | 0.09 | 1.269491 | 1.6116084 | 23.22309 | 0.047617 | 18.76  |
| 890    | 2015 | -0.62 | 0.09 | 1.269491 | 1.6116084 | 21.81493 | 0.010931 | 21.07  |
| 581    | 2015 | -0.05 | 0.09 | 1.269491 | 1.6116084 | 23.47719 | 0.127137 | 20.22  |
| 600667 | 2015 | -0.3  | 0.09 | 1.269491 | 1.6116084 | 22.45071 | 0.060899 | 32.79  |
| 600667 | 2015 | -0.3  | 0.09 | 1.269491 | 1.6116084 | 22.45071 | 0.060899 | 32.79  |
| 890    | 2015 | -0.8  | 0.09 | 1.269491 | 1.6116084 | 21.81493 | 0.010931 | 21.07  |
| 2540   | 2015 | 0.048 | 0.09 | 1.269491 | 1.6116084 | 21.85005 | 0.088976 | 42.49  |
| 600096 | 2015 | 0.154 | 0.01 | 1.545982 | 2.3900594 | 24.07511 | 0.027309 | 54.33  |
| 600459 | 2015 | 0.893 | 0.01 | 1.545982 | 2.3900594 | 21.91452 | 0.037118 | 39.34  |
| 300142 | 2015 | 1.522 | 0.01 | 1.545982 | 2.3900594 | 22.5571  | -0.3058  | 11.55  |
| 878    | 2015 | -0.49 | 0.01 | 1.545982 | 2.3900594 | 23.59131 | 0.01018  | 43.18  |
| 948    | 2015 | 0.612 | 0.01 | 1.545982 | 2.3900594 | 21.68171 | 0.01356  | 26.88  |
| 807    | 2015 | -0.29 | 0.01 | 1.545982 | 2.3900594 | 24.10022 | -0.066   | 49.13  |
| 600422 | 2015 | -0.4  | 0.01 | 1.545982 | 2.3900594 | 22.3223  | 0.129297 | 29.79  |
| 538    | 2015 | 0.036 | 0.01 | 1.545982 | 2.3900594 | 23.6829  | 0.203698 | 41.52  |
| 960    | 2015 | -0.46 | 0.01 | 1.545982 | 2.3900594 | 24.041   | -0.20364 | 36.86  |
| 600792 | 2015 | -0.82 | 0.01 | 1.545982 | 2.3900594 | 22.50142 | -0.25299 | 60.19  |
| 300142 | 2015 | 1.865 | 0.01 | 1.545982 | 2.3900594 | 22.5571  | -0.3058  | 11.55  |
| 300142 | 2015 | 1.865 | 0.01 | 1.545982 | 2.3900594 | 22.06531 | -0.3058  | 11.55  |
| 960    | 2015 | -0.36 | 0.01 | 1.545982 | 2.3900594 | 24.041   | -0.20364 | 36.86  |
| 600459 | 2015 | 0.893 | 0.01 | 1.545982 | 2.3900594 | 21.7153  | 0.037118 | 39.34  |
| 600459 | 2015 | 0.517 | 0.01 | 1.545982 | 2.3900594 | 21.91452 | 0.037118 | 39.34  |
| 878    | 2015 | 0.465 | 0.01 | 1.545982 | 2.3900594 | 23.59131 | 0.01018  | 43.18  |
| 948    | 2015 | 0.433 | 0.01 | 1.545982 | 2.3900594 | 21.68171 | 0.01356  | 26.88  |
| 600459 | 2015 | 0.893 | 0.01 | 1.545982 | 2.3900594 | 21.91452 | 0.037118 | 39.34  |
| 948    | 2015 | 0.433 | 0.01 | 1.545982 | 2.3900594 | 21.68171 | 0.01356  | 26.88  |
| 600096 | 2015 | 0.154 | 0.01 | 1.545982 | 2.3900594 | 24.92911 | 0.027309 | 54.33  |
| 2059   | 2015 | -0.26 | 0.01 | 1.545982 | 2.3900594 | 22.12427 | 0.053004 | 49.52  |
| 807    | 2015 | -0.13 | 0.01 | 1.545982 | 2.3900594 | 24.10022 | -0.066   | 49.13  |
| 600792 | 2015 | -0.75 | 0.01 | 1.545982 | 2.3900594 | 22.50142 | -0.25299 | 60.19  |
| 807    | 2015 | -0.58 | 0.01 | 1.545982 | 2.3900594 | 24.10022 | -0.066   | 49.13  |
| 300142 | 2015 | 1.865 | 0.01 | 1.545982 | 2.3900594 | 22.5571  | -0.3058  | 11.55  |
| 538    | 2015 | -0.15 | 0.01 | 1.545982 | 2.3900594 | 23.6829  | 0.203698 | 41.52  |
| 807    | 2015 | -0.37 | 0.01 | 1.545982 | 2.3900594 | 24.10022 | -0.066   | 49.13  |
| 538    | 2015 | -0.41 | 0.01 | 1.545982 | 2.3900594 | 23.6829  | 0.203698 | 41.52  |
| 600096 | 2015 | -0.12 | 0.01 | 1.545982 | 2.3900594 | 24.92911 | 0.027309 | 54.33  |
| 600096 | 2015 | -0.94 | 0.01 | 1.545982 | 2.3900594 | 24.92911 | 0.027309 | 54.33  |
| 600459 | 2015 | 0.893 | 0.01 | 1.545982 | 2.3900594 | 21.91452 | 0.037118 | 39.34  |
| 948    | 2015 | 0.433 | 0.01 | 1.545982 | 2.3900594 | 21.68171 | 0.01356  | 26.88  |
| 2265   | 2015 | -0.54 | 0.01 | 1.545982 | 2.3900594 | 20.44127 | -0.06718 | 48.2   |
| 960    | 2015 | -0.46 | 0.01 | 1.545982 | 2.3900594 | 24.041   | -0.20364 | 36.86  |

|        |      |       |      |          |           |          |          |       |
|--------|------|-------|------|----------|-----------|----------|----------|-------|
| 300142 | 2015 | 1.865 | 0.01 | 1.545982 | 2.3900594 | 22.5571  | -0.3058  | 11.55 |
| 600422 | 2015 | 0.466 | 0.01 | 1.545982 | 2.3900594 | 22.3223  | 0.129297 | 29.79 |
| 600422 | 2015 | 0.466 | 0.01 | 1.545982 | 2.3900594 | 22.3223  | 0.129297 | 29.79 |
| 948    | 2015 | 0.924 | 0.01 | 1.545982 | 2.3900594 | 21.68171 | 0.01356  | 26.88 |
| 600096 | 2015 | -0.2  | 0.01 | 1.545982 | 2.3900594 | 24.92911 | 0.027309 | 54.33 |
| 960    | 2015 | -0.31 | 0.01 | 1.545982 | 2.3900594 | 24.041   | -0.20364 | 36.86 |
| 600422 | 2015 | -0.29 | 0.01 | 1.545982 | 2.3900594 | 22.06178 | 0.129297 | 29.79 |
| 538    | 2015 | -0.41 | 0.01 | 1.545982 | 2.3900594 | 23.6829  | 0.203698 | 41.52 |
| 600096 | 2015 | -0.14 | 0.01 | 1.545982 | 2.3900594 | 24.92911 | 0.027309 | 54.33 |
| 600096 | 2015 | 0.389 | 0.01 | 1.545982 | 2.3900594 | 24.92911 | 0.027309 | 54.33 |
| 960    | 2015 | -0.26 | 0.01 | 1.545982 | 2.3900594 | 24.041   | -0.20364 | 36.86 |
| 903    | 2015 | -0.52 | 0.01 | 1.545982 | 2.3900594 | 22.66816 | 0.046634 | 33.55 |
| 878    | 2015 | -0.86 | 0.01 | 1.545982 | 2.3900594 | 23.59131 | 0.01018  | 43.18 |
| 300142 | 2015 | 1.865 | 0.01 | 1.545982 | 2.3900594 | 22.5571  | -0.3058  | 11.55 |
| 2053   | 2015 | -0.35 | 0.01 | 1.545982 | 2.3900594 | 22.12047 | 0.057084 | 33.43 |
| 903    | 2015 | -0.53 | 0.01 | 1.545982 | 2.3900594 | 22.68511 | 0.046634 | 33.55 |
| 948    | 2015 | 0.433 | 0.01 | 1.545982 | 2.3900594 | 21.68171 | 0.01356  | 26.88 |
| 600459 | 2015 | 0.517 | 0.01 | 1.545982 | 2.3900594 | 21.91452 | 0.037118 | 39.34 |
| 960    | 2015 | -0.22 | 0.01 | 1.545982 | 2.3900594 | 24.041   | -0.20364 | 36.86 |
| 903    | 2015 | -0.62 | 0.01 | 1.545982 | 2.3900594 | 22.68511 | 0.046634 | 33.55 |
| 960    | 2015 | -0.05 | 0.01 | 1.545982 | 2.3900594 | 24.041   | -0.20364 | 36.86 |
| 960    | 2015 | -0.91 | 0.01 | 1.545982 | 2.3900594 | 24.041   | -0.20364 | 36.86 |
| 300142 | 2015 | 1.865 | 0.01 | 1.545982 | 2.3900594 | 22.5571  | -0.3058  | 11.55 |
| 878    | 2015 | -0.86 | 0.01 | 1.545982 | 2.3900594 | 23.59131 | 0.01018  | 43.18 |
| 948    | 2015 | 0.433 | 0.01 | 1.545982 | 2.3900594 | 21.567   | 0.01356  | 26.88 |
| 538    | 2015 | 0.036 | 0.01 | 1.545982 | 2.3900594 | 23.6829  | 0.203698 | 41.52 |
| 2059   | 2015 | -0.26 | 0.01 | 1.545982 | 2.3900594 | 21.36712 | 0.053004 | 49.52 |
| 878    | 2015 | 0.465 | 0.01 | 1.545982 | 2.3900594 | 23.87211 | 0.01018  | 43.18 |
| 878    | 2015 | 0.465 | 0.01 | 1.545982 | 2.3900594 | 23.59131 | 0.01018  | 43.18 |
| 2053   | 2015 | -0.35 | 0.01 | 1.545982 | 2.3900594 | 21.84167 | 0.057084 | 33.43 |
| 807    | 2015 | -0.58 | 0.01 | 1.545982 | 2.3900594 | 24.10022 | -0.066   | 49.13 |
| 538    | 2015 | -0.41 | 0.01 | 1.545982 | 2.3900594 | 23.6829  | 0.203698 | 41.52 |
| 878    | 2015 | -0.28 | 0.01 | 1.545982 | 2.3900594 | 23.59131 | 0.01018  | 43.18 |
| 903    | 2015 | -0.52 | 0.01 | 1.545982 | 2.3900594 | 22.68511 | 0.046634 | 33.55 |
| 807    | 2015 | -0.29 | 0.01 | 1.545982 | 2.3900594 | 24.10022 | -0.066   | 49.13 |
| 600792 | 2015 | -0.77 | 0.01 | 1.545982 | 2.3900594 | 22.47961 | -0.25299 | 60.19 |
| 960    | 2015 | -0.09 | 0.01 | 1.545982 | 2.3900594 | 24.041   | -0.20364 | 36.86 |
| 878    | 2015 | 0.465 | 0.01 | 1.545982 | 2.3900594 | 23.59131 | 0.01018  | 43.18 |
| 300142 | 2015 | 1.865 | 0.01 | 1.545982 | 2.3900594 | 22.5571  | -0.3058  | 11.55 |
| 600459 | 2015 | 0.667 | 0.01 | 1.545982 | 2.3900594 | 21.91452 | 0.037118 | 39.34 |
| 538    | 2015 | 0.256 | 0.01 | 1.545982 | 2.3900594 | 23.6829  | 0.203698 | 41.52 |
| 807    | 2015 | -0.23 | 0.01 | 1.545982 | 2.3900594 | 24.10022 | -0.066   | 49.13 |
| 878    | 2015 | -0.1  | 0.01 | 1.545982 | 2.3900594 | 23.59131 | 0.01018  | 43.18 |
| 878    | 2015 | 0.465 | 0.01 | 1.545982 | 2.3900594 | 23.59131 | 0.01018  | 43.18 |
| 600422 | 2015 | 0.466 | 0.01 | 1.545982 | 2.3900594 | 22.3223  | 0.129297 | 29.79 |
| 878    | 2015 | 0.465 | 0.01 | 1.545982 | 2.3900594 | 23.59131 | 0.01018  | 43.18 |
| 538    | 2015 | -0.44 | 0.01 | 1.545982 | 2.3900594 | 23.6829  | 0.203698 | 41.52 |
| 948    | 2015 | 0.433 | 0.01 | 1.545982 | 2.3900594 | 21.68171 | 0.01356  | 26.88 |
| 948    | 2015 | 0.433 | 0.01 | 1.545982 | 2.3900594 | 21.68171 | 0.01356  | 26.88 |
| 600096 | 2015 | -0.27 | 0.01 | 1.545982 | 2.3900594 | 24.92911 | 0.027309 | 54.33 |
| 600422 | 2015 | -0.22 | 0.01 | 1.545982 | 2.3900594 | 22.3223  | 0.129297 | 29.79 |
| 600422 | 2015 | -0.67 | 0.01 | 1.545982 | 2.3900594 | 22.3223  | 0.129297 | 29.79 |
| 600422 | 2015 | -0.35 | 0.01 | 1.545982 | 2.3900594 | 22.3223  | 0.129297 | 29.79 |
| 538    | 2015 | -0.41 | 0.01 | 1.545982 | 2.3900594 | 23.6829  | 0.203698 | 41.52 |

|        |      |       |      |          |           |          |          |       |
|--------|------|-------|------|----------|-----------|----------|----------|-------|
| 878    | 2015 | -0.49 | 0.01 | 1.545982 | 2.3900594 | 23.59131 | 0.01018  | 43.18 |
| 878    | 2015 | -0.25 | 0.01 | 1.545982 | 2.3900594 | 23.59131 | 0.01018  | 43.18 |
| 960    | 2015 | -0.03 | 0.01 | 1.545982 | 2.3900594 | 24.041   | -0.20364 | 36.86 |
| 300142 | 2015 | 1.865 | 0.01 | 1.545982 | 2.3900594 | 22.5571  | -0.3058  | 11.55 |
| 948    | 2015 | 0.433 | 0.01 | 1.545982 | 2.3900594 | 21.68171 | 0.01356  | 26.88 |
| 600422 | 2015 | -0.56 | 0.01 | 1.545982 | 2.3900594 | 22.3223  | 0.129297 | 29.79 |
| 600096 | 2015 | 0.389 | 0.01 | 1.545982 | 2.3900594 | 24.92911 | 0.027309 | 54.33 |
| 807    | 2015 | -0.32 | 0.01 | 1.545982 | 2.3900594 | 23.26579 | -0.066   | 49.13 |
| 600096 | 2015 | -0.3  | 0.01 | 1.545982 | 2.3900594 | 24.92911 | 0.027309 | 54.33 |
| 600422 | 2015 | -0.53 | 0.01 | 1.545982 | 2.3900594 | 22.3223  | 0.129297 | 29.79 |
| 600096 | 2015 | -0.27 | 0.01 | 1.545982 | 2.3900594 | 24.92911 | 0.027309 | 54.33 |
| 878    | 2015 | -0.49 | 0.01 | 1.545982 | 2.3900594 | 23.59131 | 0.01018  | 43.18 |
| 903    | 2015 | -0.62 | 0.01 | 1.545982 | 2.3900594 | 22.68511 | 0.046634 | 33.55 |
| 600096 | 2015 | -0.24 | 0.01 | 1.545982 | 2.3900594 | 24.92911 | 0.027309 | 54.33 |
| 600422 | 2015 | -0.59 | 0.01 | 1.545982 | 2.3900594 | 22.3223  | 0.129297 | 29.79 |
| 948    | 2015 | 1.415 | 0.01 | 1.545982 | 2.3900594 | 21.68171 | 0.01356  | 26.88 |
| 2059   | 2015 | -0.26 | 0.01 | 1.545982 | 2.3900594 | 22.12427 | 0.053004 | 49.52 |
| 2265   | 2015 | -0.54 | 0.01 | 1.545982 | 2.3900594 | 20.46255 | -0.06718 | 48.2  |
| 600792 | 2015 | -0.77 | 0.01 | 1.545982 | 2.3900594 | 22.50142 | -0.25299 | 60.19 |
| 600422 | 2015 | 0.294 | 0.01 | 1.545982 | 2.3900594 | 22.3223  | 0.129297 | 29.79 |
| 300142 | 2015 | 1.407 | 0.01 | 1.545982 | 2.3900594 | 22.5571  | -0.3058  | 11.55 |
| 600459 | 2015 | 0.893 | 0.01 | 1.545982 | 2.3900594 | 21.91452 | 0.037118 | 39.34 |
| 2053   | 2015 | -0.35 | 0.01 | 1.545982 | 2.3900594 | 22.12047 | 0.057084 | 33.43 |
| 600422 | 2015 | -0.67 | 0.01 | 1.545982 | 2.3900594 | 22.3223  | 0.129297 | 29.79 |
| 300142 | 2015 | 1.767 | 0.01 | 1.545982 | 2.3900594 | 22.5571  | -0.3058  | 11.55 |
| 538    | 2015 | -0.44 | 0.01 | 1.545982 | 2.3900594 | 23.34166 | 0.203698 | 41.52 |
| 600792 | 2015 | -0.7  | 0.01 | 1.545982 | 2.3900594 | 22.50142 | -0.25299 | 60.19 |
| 600792 | 2015 | -0.74 | 0.01 | 1.545982 | 2.3900594 | 22.50142 | -0.25299 | 60.19 |
| 807    | 2015 | -0.58 | 0.01 | 1.545982 | 2.3900594 | 24.10022 | -0.066   | 49.13 |
| 948    | 2015 | 0.433 | 0.01 | 1.545982 | 2.3900594 | 21.68171 | 0.01356  | 26.88 |
| 807    | 2015 | -0.35 | 0.01 | 1.545982 | 2.3900594 | 24.10022 | -0.066   | 49.13 |
| 960    | 2015 | -0.03 | 0.01 | 1.545982 | 2.3900594 | 23.88725 | -0.20364 | 36.86 |
| 2265   | 2015 | -0.54 | 0.01 | 1.545982 | 2.3900594 | 20.46255 | -0.06718 | 48.2  |
| 300313 | 2015 | -0.29 | 0.05 | 1.122355 | 1.2596812 | 20.32581 | -0.11457 | 30    |
| 2719   | 2015 | -0.51 | 0.05 | 1.122355 | 1.2596812 | 21.08767 | 0.063489 | 47.74 |
| 600089 | 2015 | -0.79 | 0.05 | 1.122355 | 1.2596812 | 24.97546 | 0.082092 | 11.62 |
| 600089 | 2015 | -0.31 | 0.05 | 1.122355 | 1.2596812 | 24.97546 | 0.082092 | 11.62 |
| 600089 | 2015 | -0.58 | 0.05 | 1.122355 | 1.2596812 | 24.97546 | 0.082092 | 11.62 |
| 600089 | 2015 | -0.21 | 0.05 | 1.122355 | 1.2596812 | 24.97546 | 0.082092 | 11.62 |
| 300313 | 2015 | -0.29 | 0.05 | 1.122355 | 1.2596812 | 20.63106 | -0.11457 | 30    |
| 600089 | 2015 | -0.33 | 0.05 | 1.122355 | 1.2596812 | 24.97546 | 0.082092 | 11.62 |
| 600737 | 2015 | -0.44 | 0.05 | 1.122355 | 1.2596812 | 23.41088 | 0.011474 | 51.53 |
| 600737 | 2015 | 0.49  | 0.05 | 1.122355 | 1.2596812 | 23.41088 | 0.011474 | 51.53 |
| 600089 | 2015 | 0.011 | 0.05 | 1.122355 | 1.2596812 | 24.97546 | 0.082092 | 11.62 |
| 600089 | 2015 | -0.22 | 0.05 | 1.122355 | 1.2596812 | 24.97546 | 0.082092 | 11.62 |
| 600089 | 2015 | -0.46 | 0.05 | 1.122355 | 1.2596812 | 24.97546 | 0.082092 | 11.62 |
| 600737 | 2015 | -0.35 | 0.05 | 1.122355 | 1.2596812 | 23.41088 | 0.011474 | 51.53 |
| 600737 | 2015 | 0.49  | 0.05 | 1.122355 | 1.2596812 | 23.41088 | 0.011474 | 51.53 |
| 600089 | 2015 | 0.533 | 0.05 | 1.122355 | 1.2596812 | 24.97546 | 0.082092 | 11.62 |
| 600737 | 2015 | 0.49  | 0.05 | 1.122355 | 1.2596812 | 23.41088 | 0.011474 | 51.53 |
| 600089 | 2015 | -0.26 | 0.05 | 1.122355 | 1.2596812 | 24.97546 | 0.082092 | 11.62 |
| 600089 | 2015 | -0.33 | 0.05 | 1.122355 | 1.2596812 | 24.97546 | 0.082092 | 11.62 |
| 2719   | 2015 | -0.51 | 0.05 | 1.122355 | 1.2596812 | 21.08767 | 0.063489 | 47.74 |
| 600089 | 2015 | -0.14 | 0.05 | 1.122355 | 1.2596812 | 24.97546 | 0.082092 | 11.62 |

|        |      |       |      |          |           |          |          |       |
|--------|------|-------|------|----------|-----------|----------|----------|-------|
| 600737 | 2015 | -0.44 | 0.05 | 1.122355 | 1.2596812 | 23.41088 | 0.011474 | 51.53 |
| 2719   | 2015 | -0.51 | 0.05 | 1.122355 | 1.2596812 | 21.08767 | 0.063489 | 47.74 |
| 2719   | 2015 | -0.51 | 0.05 | 1.122355 | 1.2596812 | 21.08767 | 0.063489 | 47.74 |
| 600089 | 2015 | -0.79 | 0.05 | 1.122355 | 1.2596812 | 24.97546 | 0.082092 | 11.62 |
| 300313 | 2015 | -0.29 | 0.05 | 1.122355 | 1.2596812 | 20.63106 | -0.11457 | 30    |
| 2719   | 2015 | -0.51 | 0.05 | 1.122355 | 1.2596812 | 20.9329  | 0.063489 | 47.74 |
| 600089 | 2015 | -0.25 | 0.05 | 1.122355 | 1.2596812 | 24.97546 | 0.082092 | 11.62 |
| 600089 | 2015 | -0.14 | 0.05 | 1.122355 | 1.2596812 | 24.97546 | 0.082092 | 11.62 |
| 600089 | 2015 | -0.29 | 0.05 | 1.122355 | 1.2596812 | 24.22398 | 0.082092 | 11.62 |
| 600089 | 2015 | -0.35 | 0.05 | 1.122355 | 1.2596812 | 24.97546 | 0.082092 | 11.62 |
| 600737 | 2015 | 0.49  | 0.05 | 1.122355 | 1.2596812 | 23.38048 | 0.011474 | 51.53 |
| 404    | 2015 | -0.5  | 0.08 | 1.257561 | 1.5814593 | 22.66495 | 0.111859 | 28.81 |
| 404    | 2015 | -0.47 | 0.08 | 1.257561 | 1.5814593 | 21.79262 | 0.111859 | 28.81 |
| 404    | 2015 | -0.49 | 0.08 | 1.257561 | 1.5814593 | 22.66495 | 0.111859 | 28.81 |
| 2068   | 2015 | -0.38 | 0.08 | 1.257561 | 1.5814593 | 22.57246 | 0.009608 | 43.59 |
| 2068   | 2015 | -0.54 | 0.08 | 1.257561 | 1.5814593 | 22.57246 | 0.009608 | 43.59 |
| 2068   | 2015 | -0.54 | 0.08 | 1.257561 | 1.5814593 | 22.57246 | 0.009608 | 43.59 |
| 2068   | 2015 | -0.38 | 0.08 | 1.257561 | 1.58E+00  | 22.16484 | 0.009608 | 43.59 |
| 404    | 2015 | -0.66 | 0.08 | 1.257561 | 1.58E+00  | 22.66495 | 0.111859 | 28.81 |
| 2068   | 2015 | -0.28 | 0.08 | 1.257561 | 1.58E+00  | 22.57246 | 0.009608 | 43.59 |
| 2068   | 2015 | -0.49 | 0.08 | 1.257561 | 1.58E+00  | 22.57246 | 0.009608 | 43.59 |
| 2068   | 2015 | -0.47 | 0.08 | 1.257561 | 1.58E+00  | 22.57246 | 0.009608 | 43.59 |
| 2068   | 2015 | -0.47 | 0.08 | 1.257561 | 1.58E+00  | 22.57246 | 0.009608 | 43.59 |
| 404    | 2015 | -0.5  | 0.08 | 1.257561 | 1.58E+00  | 22.66495 | 0.111859 | 28.81 |
| 404    | 2015 | -0.47 | 0.08 | 1.257561 | 1.58E+00  | 22.66495 | 0.111859 | 28.81 |
| 2068   | 2015 | -0.54 | 0.08 | 1.257561 | 1.58E+00  | 22.57246 | 0.009608 | 43.59 |
| 404    | 2015 | -0.5  | 0.08 | 1.257561 | 1.58E+00  | 22.66495 | 0.111859 | 28.81 |
| 404    | 2015 | -0.48 | 0.08 | 1.257561 | 1.58E+00  | 22.66495 | 0.111859 | 28.81 |
| 2068   | 2015 | -0.47 | 0.08 | 1.257561 | 1.58E+00  | 22.57246 | 0.009608 | 43.59 |
| 600497 | 2015 | -0.27 | 0.01 | 1.5775   | 2.49E+00  | 24.23452 | 0.006181 | 49.74 |
| 600497 | 2015 | -0.46 | 0.01 | 1.5775   | 2.49E+00  | 24.23452 | 0.006181 | 49.74 |
| 600497 | 2015 | 0.074 | 0.01 | 1.5775   | 2.49E+00  | 24.23452 | 0.006181 | 49.74 |
| 600497 | 2015 | -0.46 | 0.01 | 1.5775   | 2.4885046 | 24.23452 | 0.006181 | 49.74 |
| 600497 | 2015 | -0.46 | 0.01 | 1.5775   | 2.4885046 | 24.23452 | 0.006181 | 49.74 |
| 600497 | 2015 | -0.46 | 0.01 | 1.5775   | 2.4885046 | 24.23452 | 0.006181 | 49.74 |
| 600497 | 2015 | -0.46 | 0.01 | 1.5775   | 2.4885046 | 24.23452 | 0.006181 | 49.74 |
| 600497 | 2015 | -0.46 | 0.01 | 1.5775   | 2.4885046 | 24.23452 | 0.006181 | 49.74 |
| 600497 | 2015 | -0.91 | 0.01 | 1.5775   | 2.4885046 | 24.23452 | 0.006181 | 49.74 |
| 600497 | 2015 | -0.25 | 0.01 | 1.5775   | 2.4885046 | 24.23452 | 0.006181 | 49.74 |
| 600497 | 2015 | -0.46 | 0.01 | 1.5775   | 2.4885046 | 24.23452 | 0.006181 | 49.74 |
| 600497 | 2015 | -0.45 | 0.01 | 1.5775   | 2.4885046 | 23.85176 | 0.006181 | 49.74 |
| 600497 | 2015 | -0.27 | 0.01 | 1.5775   | 2.4885046 | 24.23452 | 0.006181 | 49.74 |
| 761    | 2015 | -0.1  | 0.01 | 1.410375 | 1.9891565 | 24.51789 | -0.26054 | 74.18 |
| 761    | 2015 | -0.62 | 0.01 | 1.410375 | 1.9891565 | 24.45043 | -0.26054 | 74.18 |
| 761    | 2015 | -0.62 | 0.01 | 1.410375 | 1.9891565 | 24.51789 | -0.26054 | 74.18 |
| 761    | 2015 | -0.1  | 0.01 | 1.410375 | 1.9891565 | 24.51789 | -0.26054 | 74.18 |
| 761    | 2015 | -0.1  | 0.01 | 1.410375 | 1.9891565 | 24.51789 | -0.26054 | 74.18 |
| 559    | 2015 | -0.25 | 0.12 | 1.115092 | 1.2434303 | 23.26855 | 0.183056 | 51.53 |
| 300203 | 2015 | 0.708 | 0.12 | 1.115092 | 1.2434303 | 22.13753 | 0.110131 | 24.61 |
| 2135   | 2015 | -0.27 | 0.12 | 1.115092 | 1.2434303 | 22.92313 | 0.015541 | 29.07 |
| 2247   | 2015 | -0.34 | 0.12 | 1.115092 | 1.2434303 | 21.0113  | 0.080016 | 18.51 |
| 300244 | 2015 | -0.28 | 0.12 | 1.115092 | 1.2434303 | 21.55277 | 0.168856 | 37.69 |
| 300020 | 2015 | -0.15 | 0.12 | 1.115092 | 1.2434303 | 22.32756 | 0.037004 | 25.89 |
| 2135   | 2015 | -0.34 | 0.12 | 1.115092 | 1.2434303 | 22.92313 | 0.015541 | 29.07 |
| 300360 | 2015 | -0.29 | 0.12 | 1.115092 | 1.2434303 | 21.20578 | 0.218381 | 25.76 |

|        |      |       |      |          |           |          |          |       |
|--------|------|-------|------|----------|-----------|----------|----------|-------|
| 600460 | 2015 | 0.396 | 0.12 | 1.115092 | 1.2434303 | 22.19137 | 0.017185 | 41.17 |
| 2570   | 2015 | 0.163 | 0.12 | 1.115092 | 1.2434303 | 22.3954  | 0.024401 | 33.06 |
| 2415   | 2015 | 1.189 | 0.12 | 1.115092 | 1.2434303 | 24.13496 | 0.302158 | 39.91 |
| 2415   | 2015 | 0.561 | 0.12 | 1.115092 | 1.2434303 | 24.13496 | 0.302158 | 39.91 |
| 559    | 2015 | -0.63 | 0.12 | 1.115092 | 1.2434303 | 23.26855 | 0.183056 | 51.53 |
| 2266   | 2015 | -0.12 | 0.12 | 1.115092 | 1.2434303 | 22.37429 | 0.032013 | 20.01 |
| 600596 | 2015 | -0.05 | 0.12 | 1.115092 | 1.2434303 | 22.7824  | -0.05936 | 14.98 |
| 925    | 2015 | 1.212 | 0.12 | 1.115092 | 1.2434303 | 21.54719 | 0.014083 | 19.56 |
| 300300 | 2015 | 0.782 | 0.12 | 1.115092 | 1.2434303 | 21.20433 | 0.099602 | 43.1  |
| 2570   | 2015 | -0.29 | 0.12 | 1.115092 | 1.2434303 | 22.3954  | 0.024401 | 33.06 |
| 600477 | 2015 | -0.66 | 0.12 | 1.115092 | 1.2434303 | 22.58315 | 0.071959 | 43.87 |
| 2236   | 2015 | 0.974 | 0.12 | 1.115092 | 1.2434303 | 23.16592 | 0.210332 | 41.25 |
| 2415   | 2015 | 0.846 | 0.12 | 1.115092 | 1.2434303 | 24.13496 | 0.302158 | 39.91 |
| 600477 | 2015 | -0.43 | 0.12 | 1.115092 | 1.2434303 | 22.58315 | 0.071959 | 43.87 |
| 601177 | 2015 | -0.09 | 0.12 | 1.115092 | 1.2434303 | 22.00641 | -0.06627 | 45.01 |
| 600596 | 2015 | 0.633 | 0.12 | 1.115092 | 1.2434303 | 22.7824  | -0.05936 | 14.98 |
| 600570 | 2015 | 1.227 | 0.12 | 1.115092 | 1.2434303 | 22.10336 | 0.175838 | 20.72 |
| 600677 | 2015 | -0.23 | 0.12 | 1.115092 | 1.2434303 | 22.85956 | 0.023352 | 19.2  |
| 600677 | 2015 | -0.67 | 0.12 | 1.115092 | 1.2434303 | 22.85956 | 0.023352 | 19.2  |
| 600797 | 2015 | 0.047 | 0.12 | 1.115092 | 1.2434303 | 22.17684 | 0.107701 | 19.65 |
| 600571 | 2015 | 0.344 | 0.12 | 1.115092 | 1.2434303 | 21.18033 | 0.122655 | 19.58 |
| 600987 | 2015 | -0.73 | 0.12 | 1.115092 | 1.2434303 | 22.11843 | 0.181792 | 32.9  |
| 2637   | 2015 | 0.025 | 0.12 | 1.115092 | 1.2434303 | 21.18369 | 0.014794 | 11.97 |
| 156    | 2015 | 0.606 | 0.12 | 1.115092 | 1.2434303 | 23.2629  | 0.087942 | 41.85 |
| 2247   | 2015 | -0.05 | 0.12 | 1.115092 | 1.2434303 | 20.8534  | 0.080016 | 18.51 |
| 300145 | 2015 | -0.03 | 0.12 | 1.115092 | 1.2434303 | 22.40279 | 0.077632 | 29.19 |
| 156    | 2015 | 0.606 | 0.12 | 1.115092 | 1.2434303 | 23.2629  | 0.087942 | 41.85 |
| 300306 | 2015 | 0.428 | 0.12 | 1.115092 | 1.2434303 | 20.85951 | 0.051781 | 33.36 |
| 2444   | 2015 | -0.5  | 0.12 | 1.115092 | 1.2434303 | 22.4327  | 0.116898 | 48.22 |
| 300145 | 2015 | -0.01 | 0.12 | 1.115092 | 1.2434303 | 22.40279 | 0.077632 | 29.19 |
| 300145 | 2015 | -0.38 | 0.12 | 1.115092 | 1.2434303 | 22.40279 | 0.077632 | 29.19 |
| 156    | 2015 | 0.606 | 0.12 | 1.115092 | 1.2434303 | 23.2629  | 0.057526 | 41.85 |
| 2415   | 2015 | 0.928 | 0.12 | 1.115092 | 1.2434303 | 23.79729 | 0.302158 | 39.91 |
| 600704 | 2015 | -0.82 | 0.12 | 1.115092 | 1.2434303 | 25.0133  | 0.083521 | 33.81 |
| 2364   | 2015 | -0.06 | 0.12 | 1.115092 | 1.2434303 | 21.21579 | 0.118533 | 38.3  |
| 559    | 2015 | -0.19 | 0.12 | 1.115092 | 1.2434303 | 23.26855 | 0.183056 | 51.53 |
| 2364   | 2015 | 0.969 | 0.12 | 1.115092 | 1.2434303 | 21.21579 | 0.118533 | 38.3  |
| 2266   | 2015 | -0.3  | 0.12 | 1.115092 | 1.2434303 | 22.37429 | 0.032013 | 20.01 |
| 2364   | 2015 | 0.367 | 0.12 | 1.115092 | 1.2434303 | 21.21579 | 0.118533 | 38.3  |
| 603806 | 2015 | -0.04 | 0.12 | 1.115092 | 1.2434303 | 22.17743 | 0.151643 | 56.29 |
| 300306 | 2015 | 0.42  | 0.12 | 1.115092 | 1.2434303 | 20.85951 | 0.051781 | 33.36 |
| 2115   | 2015 | 0.326 | 0.12 | 1.115092 | 1.2434303 | 21.44975 | 0.019779 | 19.35 |
| 2364   | 2015 | 0.473 | 0.12 | 1.115092 | 1.2434303 | 21.21579 | 0.118533 | 38.3  |
| 600570 | 2015 | 1.649 | 0.12 | 1.115092 | 1.2434303 | 22.10336 | 0.175838 | 20.72 |
| 2493   | 2015 | 0.089 | 0.12 | 1.115092 | 1.2434303 | 24.3469  | 0.022403 | 74.18 |
| 2637   | 2015 | 0.029 | 0.12 | 1.115092 | 1.2434303 | 21.49593 | 0.014794 | 11.97 |
| 2236   | 2015 | 0.961 | 0.12 | 1.115092 | 1.2434303 | 23.16592 | 0.210332 | 41.25 |
| 2266   | 2015 | -0.3  | 0.12 | 1.115092 | 1.2434303 | 22.37429 | 0.032013 | 20.01 |
| 2280   | 2015 | 0.587 | 0.12 | 1.115092 | 1.2434303 | 21.89936 | 0.278174 | 27.79 |
| 2508   | 2015 | -0.18 | 0.12 | 1.115092 | 1.2434303 | 22.32071 | 0.261489 | 49.75 |
| 300020 | 2015 | -0.15 | 0.12 | 1.115092 | 1.2434303 | 22.32756 | 0.037004 | 25.89 |
| 300078 | 2015 | -0.01 | 0.12 | 1.115092 | 1.2434303 | 21.62218 | 0.107554 | 26.93 |
| 300068 | 2015 | -0.44 | 0.12 | 1.115092 | 1.2434303 | 22.34771 | 0.083132 | 19.67 |
| 2115   | 2015 | 0.417 | 0.12 | 1.115092 | 1.2434303 | 21.44975 | 0.019779 | 19.35 |

|        |      |       |      |          |           |          |          |       |
|--------|------|-------|------|----------|-----------|----------|----------|-------|
| 559    | 2015 | -0.3  | 0.12 | 1.115092 | 1.2434303 | 23.26855 | 0.183056 | 51.53 |
| 2444   | 2015 | -0.4  | 0.12 | 1.115092 | 1.2434303 | 22.4327  | 0.116898 | 48.22 |
| 2534   | 2015 | -0.18 | 0.12 | 1.115092 | 1.2434303 | 22.67801 | -0.07164 | 40    |
| 2135   | 2015 | -0.61 | 0.12 | 1.115092 | 1.2434303 | 22.92313 | 0.015541 | 29.07 |
| 600677 | 2015 | -0.35 | 0.12 | 1.115092 | 1.2434303 | 22.85956 | 0.023352 | 19.2  |
| 600596 | 2015 | 0.186 | 0.12 | 1.115092 | 1.2434303 | 22.7824  | -0.05936 | 14.98 |
| 300145 | 2015 | -0.44 | 0.12 | 1.115092 | 1.2434303 | 22.40279 | 0.077632 | 29.19 |
| 300078 | 2015 | 0.81  | 0.12 | 1.115092 | 1.2434303 | 21.62218 | 0.107554 | 26.93 |
| 2247   | 2015 | -0.34 | 0.12 | 1.115092 | 1.2434303 | 21.0113  | 0.080016 | 18.51 |
| 2236   | 2015 | 0.961 | 0.12 | 1.115092 | 1.2434303 | 23.16592 | 0.210332 | 41.25 |
| 2266   | 2015 | -0.13 | 0.12 | 1.115092 | 1.2434303 | 22.37429 | 0.032013 | 20.01 |
| 300020 | 2015 | -0.15 | 0.12 | 1.115092 | 1.2434303 | 22.32756 | 0.037004 | 25.89 |
| 300203 | 2015 | 0.708 | 0.12 | 1.115092 | 1.2434303 | 22.13753 | 0.110131 | 24.61 |
| 300244 | 2015 | 0.035 | 0.12 | 1.115092 | 1.2434303 | 21.55277 | 0.168856 | 37.69 |
| 925    | 2015 | 0.55  | 0.12 | 1.115092 | 1.2434303 | 22.18388 | 0.014083 | 19.56 |
| 559    | 2015 | -0.63 | 0.12 | 1.115092 | 1.2434303 | 23.26855 | 0.183056 | 51.53 |
| 2276   | 2015 | 0.691 | 0.12 | 1.115092 | 1.2434303 | 22.34145 | 0.09005  | 44.72 |
| 2479   | 2015 | -0.75 | 0.12 | 1.115092 | 1.2434303 | 22.33027 | 0.074368 | 38    |
| 600570 | 2015 | 2.552 | 0.12 | 1.115092 | 1.2434303 | 22.10336 | 0.175838 | 20.72 |
| 2430   | 2015 | -0.36 | 0.12 | 1.115092 | 1.2434303 | 22.99855 | 0.039443 | 61.49 |
| 2479   | 2015 | -0.5  | 0.12 | 1.115092 | 1.2434303 | 22.33027 | 0.074368 | 38    |
| 2418   | 2015 | -0.87 | 0.12 | 1.115092 | 1.2434303 | 21.89736 | 0.046313 | 15.58 |
| 300020 | 2015 | -0.15 | 0.12 | 1.115092 | 1.2434303 | 22.32756 | 0.037004 | 25.89 |
| 601177 | 2015 | -0.09 | 0.12 | 1.115092 | 1.2434303 | 22.10469 | -0.06627 | 45.01 |
| 300306 | 2015 | 0.376 | 0.12 | 1.115092 | 1.2434303 | 20.86719 | 0.051781 | 33.36 |
| 2508   | 2015 | -0.18 | 0.12 | 1.115092 | 1.2434303 | 22.33802 | 0.261489 | 49.75 |
| 2276   | 2015 | 0.005 | 0.12 | 1.115092 | 1.2434303 | 22.34145 | 0.09005  | 44.72 |
| 600571 | 2015 | 0.344 | 0.12 | 1.115092 | 1.2434303 | 21.18033 | 0.122655 | 19.58 |
| 603806 | 2015 | 0.128 | 0.12 | 1.115092 | 1.2434303 | 22.29914 | 0.151643 | 56.29 |
| 601177 | 2015 | -0.09 | 0.12 | 1.115092 | 1.2434303 | 22.10469 | -0.06627 | 45.01 |
| 2534   | 2015 | -0.28 | 0.12 | 1.115092 | 1.2434303 | 22.46036 | -0.07164 | 40    |
| 2284   | 2015 | -0.49 | 0.12 | 1.115092 | 1.2434303 | 22.07977 | 0.056598 | 38.8  |
| 600677 | 2015 | -0.67 | 0.12 | 1.115092 | 1.2434303 | 22.85956 | 0.023352 | 19.2  |
| 2493   | 2015 | -0.58 | 0.12 | 1.115092 | 1.2434303 | 24.3469  | 0.022403 | 74.18 |
| 600987 | 2015 | -0.29 | 0.12 | 1.115092 | 1.2434303 | 22.11843 | 0.181792 | 32.9  |
| 2135   | 2015 | -0.27 | 0.12 | 1.115092 | 1.2434303 | 22.92313 | 0.015541 | 29.07 |
| 2135   | 2015 | -0.57 | 0.12 | 1.115092 | 1.2434303 | 22.92313 | 0.015541 | 29.07 |
| 2430   | 2015 | -0.36 | 0.12 | 1.115092 | 1.2434303 | 22.99855 | 0.039443 | 61.49 |
| 600477 | 2015 | -0    | 0.12 | 1.115092 | 1.2434303 | 22.58315 | 0.071959 | 43.87 |
| 2534   | 2015 | -0.12 | 0.12 | 1.115092 | 1.2434303 | 22.46036 | -0.07164 | 40    |
| 2095   | 2015 | 0.074 | 0.12 | 1.115092 | 1.2434303 | 20.19876 | 0.035274 | 48.75 |
| 600797 | 2015 | 0.292 | 0.12 | 1.115092 | 1.2434303 | 22.17684 | 0.107701 | 19.65 |
| 600570 | 2015 | 1.604 | 0.12 | 1.115092 | 1.2434303 | 22.10336 | 0.175838 | 20.72 |
| 2444   | 2015 | -0.5  | 0.12 | 1.115092 | 1.2434303 | 22.4327  | 0.116898 | 48.22 |
| 600677 | 2015 | -0.35 | 0.12 | 1.115092 | 1.2434303 | 22.85956 | 0.023352 | 19.2  |
| 300300 | 2015 | 0.694 | 0.12 | 1.115092 | 1.2434303 | 21.20433 | 0.099602 | 43.1  |
| 156    | 2015 | 0.606 | 0.12 | 1.115092 | 1.2434303 | 23.2629  | 0.087942 | 41.85 |
| 2444   | 2015 | -0.09 | 0.12 | 1.115092 | 1.2434303 | 22.4327  | 0.116898 | 48.22 |
| 909    | 2015 | 0.179 | 0.12 | 1.115092 | 1.2434303 | 22.20378 | 0.026295 | 47.7  |
| 2019   | 2015 | 0.479 | 0.12 | 1.115092 | 1.2434303 | 22.23768 | 0.125656 | 47.35 |
| 2570   | 2015 | 0.163 | 0.12 | 1.115092 | 1.2434303 | 22.3954  | 0.024401 | 33.06 |
| 2430   | 2015 | -0.36 | 0.12 | 1.115092 | 1.2434303 | 22.68921 | 0.039443 | 61.49 |
| 2625   | 2015 | -0.14 | 0.12 | 1.115092 | 1.2434303 | 20.37188 | 0.076243 | 18.23 |
| 600570 | 2015 | 1.227 | 0.12 | 1.115092 | 1.2434303 | 22.10336 | 0.175838 | 20.72 |

|        |      |       |      |          |           |          |          |         |
|--------|------|-------|------|----------|-----------|----------|----------|---------|
| 300244 | 2015 | 0.03  | 0.12 | 1.115092 | 1.2434303 | 21.55277 | 0.168856 | 37.69   |
| 300078 | 2015 | 0.12  | 0.12 | 1.115092 | 1.2434303 | 21.62218 | 0.107554 | 26.93   |
| 2552   | 2015 | -0.34 | 0.12 | 1.115092 | 1.2434303 | 20.95932 | 0.005252 | 32.83   |
| 300270 | 2015 | 1.243 | 0.12 | 1.115092 | 1.2434303 | 20.46918 | 0.071003 | 57.46   |
| 300203 | 2015 | 0.425 | 0.12 | 1.115092 | 1.2434303 | 22.13753 | 0.110131 | 24.61   |
| 300145 | 2015 | -0.01 | 0.12 | 1.115092 | 1.2434303 | 22.40279 | 0.077632 | 29.19   |
| 559    | 2015 | -0.33 | 0.12 | 1.115092 | 1.2434303 | 23.26855 | 0.183056 | 51.53   |
| 603806 | 2015 | 0.172 | 0.12 | 1.115092 | 1.2434303 | 22.29914 | 0.151643 | 56.29   |
| 2115   | 2015 | 0.326 | 0.12 | 1.115092 | 1.2434303 | 21.44975 | 0.019779 | 19.35   |
| 2552   | 2015 | 0.036 | 0.12 | 1.115092 | 1.2434303 | 20.95932 | 0.005252 | 32.83   |
| 600460 | 2015 | 0.396 | 0.12 | 1.115092 | 1.2434303 | 21.93021 | 0.017185 | 41.17   |
| 300306 | 2015 | 0.695 | 0.12 | 1.115092 | 1.2434303 | 20.86719 | 0.051781 | 33.36   |
| 300145 | 2015 | -0.65 | 0.12 | 1.115092 | 1.2434303 | 22.40279 | 0.077632 | 29.19   |
| 559    | 2015 | -0.41 | 0.12 | 1.115092 | 1.2434303 | 23.26855 | 0.183056 | 51.53   |
| 2534   | 2015 | -0.28 | 0.12 | 1.115092 | 1.2434303 | 22.46036 | -0.07164 | 40      |
| 2284   | 2015 | -0.44 | 0.12 | 1.115092 | 1.2434303 | 22.07977 | 0.056598 | 38.8    |
| 300078 | 2015 | 0.81  | 0.12 | 1.115092 | 1.2434303 | 21.62218 | 0.107554 | 26.93   |
| 601177 | 2015 | -0.02 | 0.12 | 1.115092 | 1.2434303 | 22.10469 | -0.06627 | 45.01   |
| 600776 | 2015 | 0.099 | 0.12 | 1.115092 | 1.2434303 | 22.03627 | 0.056478 | 45.4389 |
| 2284   | 2015 | -0.62 | 0.12 | 1.115092 | 1.2434303 | 22.07977 | 0.056598 | 38.8    |
| 600677 | 2015 | 0.321 | 0.12 | 1.115092 | 1.2434303 | 22.85956 | 0.023352 | 19.2    |
| 601177 | 2015 | -0.02 | 0.12 | 1.115092 | 1.2434303 | 22.10469 | -0.06627 | 45.01   |
| 300203 | 2015 | -0.29 | 0.12 | 1.115092 | 1.2434303 | 22.13753 | 0.110131 | 24.61   |
| 600596 | 2015 | 0.186 | 0.12 | 1.115092 | 1.2434303 | 22.7824  | -0.05936 | 14.98   |
| 559    | 2015 | -0.48 | 0.12 | 1.115092 | 1.2434303 | 23.26855 | 0.183056 | 51.53   |
| 600571 | 2015 | 0.618 | 0.12 | 1.115092 | 1.2434303 | 21.18033 | 0.122655 | 19.58   |
| 2364   | 2015 | 0.277 | 0.12 | 1.115092 | 1.2434303 | 21.21579 | 0.118533 | 38.3    |
| 300078 | 2015 | 0.81  | 0.12 | 1.115092 | 1.2434303 | 21.62218 | 0.107554 | 26.93   |
| 600704 | 2015 | -0.82 | 0.12 | 1.115092 | 1.2434303 | 24.0523  | 0.083521 | 33.81   |
| 2276   | 2015 | -0.52 | 0.12 | 1.115092 | 1.2434303 | 22.34145 | 0.09005  | 44.72   |
| 559    | 2015 | -0.63 | 0.12 | 1.115092 | 1.2434303 | 23.26855 | 0.183056 | 51.53   |
| 600776 | 2015 | 0.554 | 0.12 | 1.115092 | 1.2434303 | 22.03627 | 0.056478 | 45.4389 |
| 2364   | 2015 | 0.277 | 0.12 | 1.115092 | 1.2434303 | 21.21579 | 0.118533 | 38.3    |
| 600477 | 2015 | -0.66 | 0.12 | 1.115092 | 1.2434303 | 22.58315 | 0.071959 | 43.87   |
| 600776 | 2015 | 0.101 | 0.12 | 1.115092 | 1.2434303 | 22.03627 | 0.056478 | 45.4389 |
| 300203 | 2015 | 0.045 | 0.12 | 1.115092 | 1.2434303 | 22.13753 | 0.110131 | 24.61   |
| 600776 | 2015 | 0.198 | 0.12 | 1.115092 | 1.2434303 | 22.03627 | 0.056478 | 45.4389 |
| 600596 | 2015 | 0.186 | 0.12 | 1.115092 | 1.2434303 | 22.7824  | -0.05936 | 14.98   |
| 2266   | 2015 | -0.12 | 0.12 | 1.115092 | 1.2434303 | 22.37429 | 0.032013 | 20.01   |
| 300145 | 2015 | -0.32 | 0.12 | 1.115092 | 1.2434303 | 22.40279 | 0.077632 | 29.19   |
| 2479   | 2015 | -0.5  | 0.12 | 1.115092 | 1.2434303 | 22.33027 | 0.074368 | 38      |
| 300145 | 2015 | -0.39 | 0.12 | 1.115092 | 1.2434303 | 22.40279 | 0.077632 | 29.19   |
| 963    | 2015 | -0.05 | 0.12 | 1.115092 | 1.2434303 | 22.76172 | 0.302158 | 35.5    |
| 600704 | 2015 | -0.82 | 0.12 | 1.115092 | 1.2434303 | 25.0133  | 0.083521 | 33.81   |
| 300068 | 2015 | -0.34 | 0.12 | 1.115092 | 1.2434303 | 22.34771 | 0.083132 | 19.67   |
| 300020 | 2015 | 0.52  | 0.12 | 1.115092 | 1.2434303 | 22.32756 | 0.037004 | 25.89   |
| 2625   | 2015 | -0.33 | 0.12 | 1.115092 | 1.2434303 | 20.37188 | 0.076243 | 18.23   |
| 2247   | 2015 | -0.38 | 0.12 | 1.115092 | 1.2434303 | 21.0113  | 0.080016 | 18.51   |
| 2493   | 2015 | 0.547 | 0.12 | 1.115092 | 1.2434303 | 24.3469  | 0.022403 | 74.18   |
| 2266   | 2015 | -0.12 | 0.12 | 1.115092 | 1.2434303 | 22.33048 | 0.032013 | 20.01   |
| 925    | 2015 | 0.55  | 0.12 | 1.115092 | 1.2434303 | 22.18388 | 0.014083 | 19.56   |
| 2364   | 2015 | 0.279 | 0.12 | 1.115092 | 1.2434303 | 21.07078 | 0.118533 | 38.3    |
| 2019   | 2015 | 0.479 | 0.12 | 1.115092 | 1.2434303 | 22.23768 | 0.125656 | 47.35   |
| 2637   | 2015 | 0.093 | 0.12 | 1.115092 | 1.2434303 | 21.49593 | 0.014794 | 11.97   |

|        |      |       |      |          |           |          |          |       |
|--------|------|-------|------|----------|-----------|----------|----------|-------|
| 300078 | 2015 | 0.213 | 0.12 | 1.115092 | 1.2434303 | 21.62218 | 0.107554 | 26.93 |
| 2115   | 2015 | 0.417 | 0.12 | 1.115092 | 1.2434303 | 21.44975 | 0.019779 | 19.35 |
| 559    | 2015 | -0.48 | 0.12 | 1.115092 | 1.2434303 | 23.26855 | 0.183056 | 51.53 |
| 300113 | 2015 | 1.93  | 0.12 | 1.115092 | 1.2434303 | 21.36979 | 0.208421 | 44.13 |
| 2488   | 2015 | -0.41 | 0.12 | 1.115092 | 1.2434303 | 22.03653 | 0.026898 | 16.59 |
| 300244 | 2015 | -0.47 | 0.12 | 1.115092 | 1.2434303 | 21.55277 | 0.168856 | 37.69 |
| 300113 | 2015 | 1.706 | 0.12 | 1.115092 | 1.2434303 | 21.36979 | 0.208421 | 44.13 |
| 300020 | 2015 | 0.836 | 0.12 | 1.115092 | 1.2434303 | 22.32756 | 0.037004 | 25.89 |
| 600677 | 2015 | -0.56 | 0.12 | 1.115092 | 1.2434303 | 22.85956 | 0.023352 | 19.2  |
| 2488   | 2015 | -0.41 | 0.12 | 1.115092 | 1.2434303 | 22.03653 | 0.026898 | 16.59 |
| 2418   | 2015 | -0.87 | 0.12 | 1.115092 | 1.2434303 | 22.13308 | 0.046313 | 15.58 |
| 300113 | 2015 | 1.93  | 0.12 | 1.115092 | 1.2434303 | 21.36979 | 0.208421 | 44.13 |
| 2637   | 2015 | 0.025 | 0.12 | 1.115092 | 1.2434303 | 21.18369 | 0.014794 | 11.97 |
| 300078 | 2015 | 0.016 | 0.12 | 1.115092 | 1.2434303 | 21.62218 | 0.107554 | 26.93 |
| 559    | 2015 | -0.63 | 0.12 | 1.115092 | 1.2434303 | 23.26855 | 0.183056 | 51.53 |
| 600596 | 2015 | 0.26  | 0.12 | 1.115092 | 1.2434303 | 22.39304 | -0.05936 | 14.98 |
| 2135   | 2015 | -0.35 | 0.12 | 1.115092 | 1.2434303 | 22.69335 | 0.015541 | 29.07 |
| 300078 | 2015 | 0.81  | 0.12 | 1.115092 | 1.2434303 | 21.52366 | 0.107554 | 26.93 |
| 2236   | 2015 | 1.162 | 0.12 | 1.115092 | 1.2434303 | 22.79139 | 0.210332 | 41.25 |
| 300078 | 2015 | 0.81  | 0.12 | 1.115092 | 1.2434303 | 21.62218 | 0.107554 | 26.93 |
| 2444   | 2015 | 0.04  | 0.12 | 1.115092 | 1.2434303 | 22.4327  | 0.116898 | 48.22 |
| 963    | 2015 | -0.05 | 0.12 | 1.115092 | 1.2434303 | 23.15839 | 0.302158 | 35.5  |
| 600677 | 2015 | -0.35 | 0.12 | 1.115092 | 1.2434303 | 22.85956 | 0.023352 | 19.2  |
| 559    | 2015 | -0.63 | 0.12 | 1.115092 | 1.2434303 | 23.26855 | 0.183056 | 51.53 |
| 2418   | 2015 | -0.34 | 0.12 | 1.115092 | 1.2434303 | 22.13308 | 0.046313 | 15.58 |
| 2019   | 2015 | -0.36 | 0.12 | 1.115092 | 1.2434303 | 22.23768 | 0.125656 | 47.35 |
| 2280   | 2015 | 1.175 | 0.12 | 1.115092 | 1.2434303 | 21.34257 | 0.278174 | 27.79 |
| 300068 | 2015 | -0.13 | 0.12 | 1.115092 | 1.2434303 | 22.34771 | 0.083132 | 19.67 |
| 600677 | 2015 | -0.05 | 0.12 | 1.115092 | 1.2434303 | 22.85956 | 0.023352 | 19.2  |
| 600677 | 2015 | -0.47 | 0.12 | 1.115092 | 1.2434303 | 22.85956 | 0.023352 | 19.2  |
| 300068 | 2015 | -0.13 | 0.12 | 1.115092 | 1.2434303 | 22.34771 | 0.083132 | 19.67 |
| 300033 | 2015 | 0.596 | 0.12 | 1.115092 | 1.2434303 | 21.68022 | 0.302158 | 36    |
| 300244 | 2015 | 0.051 | 0.12 | 1.115092 | 1.2434303 | 21.55277 | 0.168856 | 37.69 |
| 2430   | 2015 | -0.33 | 0.12 | 1.115092 | 1.2434303 | 22.99855 | 0.039443 | 61.49 |
| 2625   | 2015 | -0.33 | 0.12 | 1.115092 | 1.2434303 | 20.37188 | 0.076243 | 18.23 |
| 559    | 2015 | -0.48 | 0.12 | 1.115092 | 1.2434303 | 23.26855 | 0.183056 | 51.53 |
| 2430   | 2015 | -0.33 | 0.12 | 1.115092 | 1.2434303 | 22.99855 | 0.039443 | 61.49 |
| 156    | 2015 | 0.606 | 0.12 | 1.115092 | 1.2434303 | 23.05281 | 0.087942 | 41.85 |
| 300244 | 2015 | 0.387 | 0.12 | 1.115092 | 1.2434303 | 21.55277 | 0.168856 | 37.69 |
| 2430   | 2015 | -0.55 | 0.12 | 1.115092 | 1.2434303 | 22.99855 | 0.039443 | 61.49 |
| 2637   | 2015 | 0.277 | 0.12 | 1.115092 | 1.2434303 | 21.49593 | 0.014794 | 11.97 |
| 300113 | 2015 | 1.93  | 0.12 | 1.115092 | 1.2434303 | 21.36979 | 0.208421 | 44.13 |
| 300020 | 2015 | 0.296 | 0.12 | 1.115092 | 1.2434303 | 22.32756 | 0.037004 | 25.89 |
| 300113 | 2015 | 0.925 | 0.12 | 1.115092 | 1.2434303 | 21.36979 | 0.208421 | 44.13 |
| 300025 | 2015 | -0.46 | 0.12 | 1.115092 | 1.2434303 | 21.51183 | 0.128245 | 14.05 |
| 2479   | 2015 | -0.5  | 0.12 | 1.115092 | 1.2434303 | 22.33027 | 0.074368 | 38    |
| 300300 | 2015 | 0.694 | 0.12 | 1.115092 | 1.2434303 | 21.20433 | 0.099602 | 43.1  |
| 909    | 2015 | 0.179 | 0.12 | 1.115092 | 1.2434303 | 22.20378 | 0.026295 | 47.7  |
| 600797 | 2015 | 0.047 | 0.12 | 1.115092 | 1.2434303 | 22.17684 | 0.107701 | 19.65 |
| 2236   | 2015 | 0.961 | 0.12 | 1.115092 | 1.2434303 | 23.16592 | 0.210332 | 41.25 |
| 600987 | 2015 | -0.41 | 0.12 | 1.115092 | 1.2434303 | 22.11843 | 0.181792 | 32.9  |
| 600677 | 2015 | -0.31 | 0.12 | 1.115092 | 1.2434303 | 22.85956 | 0.023352 | 19.2  |
| 2444   | 2015 | -0.5  | 0.12 | 1.115092 | 1.2434303 | 22.4327  | 0.116898 | 48.22 |
| 2415   | 2015 | 0.846 | 0.12 | 1.115092 | 1.2434303 | 24.13496 | 0.302158 | 39.91 |



|        |      |       |      |          |           |          |          |         |
|--------|------|-------|------|----------|-----------|----------|----------|---------|
| 2444   | 2015 | -0.16 | 0.12 | 1.115092 | 1.2434303 | 22.4327  | 0.116898 | 48.22   |
| 2552   | 2015 | -0.11 | 0.12 | 1.115092 | 1.2434303 | 20.95932 | 0.005252 | 32.83   |
| 2430   | 2015 | -0.36 | 0.12 | 1.115092 | 1.2434303 | 22.99855 | 0.039443 | 61.49   |
| 2444   | 2015 | -0.36 | 0.12 | 1.115092 | 1.2434303 | 22.22615 | 0.116898 | 48.22   |
| 300020 | 2015 | 0.493 | 0.12 | 1.115092 | 1.2434303 | 22.31424 | 0.037004 | 25.89   |
| 600460 | 2015 | 0.514 | 0.12 | 1.115092 | 1.2434303 | 22.19137 | 0.017185 | 41.17   |
| 2493   | 2015 | 0.547 | 0.12 | 1.115092 | 1.2434303 | 24.3469  | 0.022403 | 74.18   |
| 600677 | 2015 | -0.35 | 0.12 | 1.115092 | 1.2434303 | 22.85956 | 0.023352 | 19.2    |
| 2508   | 2015 | -0.18 | 0.12 | 1.115092 | 1.2434303 | 22.33802 | 0.261489 | 49.75   |
| 603806 | 2015 | 0.172 | 0.12 | 1.115092 | 1.2434303 | 22.29914 | 0.151643 | 56.29   |
| 2122   | 2015 | -0.67 | 0.12 | 1.115092 | 1.2434303 | 22.74549 | 0.010707 | 42.86   |
| 559    | 2015 | -0.19 | 0.12 | 1.115092 | 1.2434303 | 23.26855 | 0.183056 | 51.53   |
| 600570 | 2015 | 2.552 | 0.12 | 1.115092 | 1.2434303 | 22.10336 | 0.175838 | 20.72   |
| 300025 | 2015 | -0.46 | 0.12 | 1.115092 | 1.2434303 | 20.8994  | 0.128245 | 14.05   |
| 600987 | 2015 | -0.41 | 0.12 | 1.115092 | 1.2434303 | 22.11843 | 0.181792 | 32.9    |
| 2122   | 2015 | -0.28 | 0.12 | 1.115092 | 1.2434303 | 22.20322 | 0.010707 | 42.86   |
| 2430   | 2015 | -0.55 | 0.12 | 1.115092 | 1.2434303 | 22.99855 | 0.039443 | 61.49   |
| 600776 | 2015 | -0.03 | 0.12 | 1.115092 | 1.2434303 | 22.03627 | 0.056478 | 45.4389 |
| 600776 | 2015 | 0.198 | 0.12 | 1.115092 | 1.2434303 | 22.03627 | 0.056478 | 45.4389 |
| 2284   | 2015 | -0.49 | 0.12 | 1.115092 | 1.2434303 | 22.07977 | 0.056598 | 38.8    |
| 300020 | 2015 | 0.554 | 0.12 | 1.115092 | 1.2434303 | 22.32756 | 0.037004 | 25.89   |
| 300020 | 2015 | -0.15 | 0.12 | 1.115092 | 1.2434303 | 22.32756 | 0.037004 | 25.89   |
| 559    | 2015 | -0.04 | 0.12 | 1.115092 | 1.2434303 | 23.26855 | 0.183056 | 51.53   |
| 2115   | 2015 | -0.12 | 0.12 | 1.115092 | 1.2434303 | 21.44975 | 0.019779 | 19.35   |
| 300078 | 2015 | 0.169 | 0.12 | 1.115092 | 1.2434303 | 21.62218 | 0.107554 | 26.93   |
| 2552   | 2015 | 0.099 | 0.12 | 1.115092 | 1.2434303 | 20.95932 | 0.005252 | 32.83   |
| 300020 | 2015 | 0.509 | 0.12 | 1.115092 | 1.2434303 | 22.32756 | 0.037004 | 25.89   |
| 600797 | 2015 | 0.402 | 0.12 | 1.115092 | 1.2434303 | 22.17684 | 0.107701 | 19.65   |
| 600797 | 2015 | 0.257 | 0.12 | 1.115092 | 1.2434303 | 22.17684 | 0.107701 | 19.65   |
| 600571 | 2015 | 0.344 | 0.12 | 1.115092 | 1.2434303 | 21.18033 | 0.122655 | 19.58   |
| 600776 | 2015 | 0.043 | 0.12 | 1.115092 | 1.2434303 | 21.98756 | 0.056478 | 45.4389 |
| 2552   | 2015 | 0.551 | 0.12 | 1.115092 | 1.2434303 | 20.95932 | 0.005252 | 32.83   |
| 925    | 2015 | 0.771 | 0.12 | 1.115092 | 1.2434303 | 22.18388 | 0.014083 | 19.56   |
| 600477 | 2015 | -0.22 | 0.12 | 1.115092 | 1.2434303 | 22.58315 | 0.071959 | 43.87   |
| 2430   | 2015 | -0.23 | 0.12 | 1.115092 | 1.2434303 | 22.99855 | 0.039443 | 61.49   |
| 2625   | 2015 | -0.26 | 0.12 | 1.115092 | 1.2434303 | 20.37188 | 0.076243 | 18.23   |
| 2430   | 2015 | -0.55 | 0.12 | 1.115092 | 1.2434303 | 22.99855 | 0.039443 | 61.49   |
| 600570 | 2015 | 1.604 | 0.12 | 1.115092 | 1.2434303 | 22.05825 | 0.175838 | 20.72   |
| 2247   | 2015 | -0.38 | 0.12 | 1.115092 | 1.2434303 | 21.0113  | 0.080016 | 18.51   |
| 600987 | 2015 | 0.592 | 0.12 | 1.115092 | 1.2434303 | 22.11843 | 0.181792 | 32.9    |
| 2534   | 2015 | -0.19 | 0.12 | 1.115092 | 1.2434303 | 22.46036 | -0.07164 | 40      |
| 2418   | 2015 | -0.72 | 0.12 | 1.115092 | 1.2434303 | 22.13308 | 0.046313 | 15.58   |
| 300306 | 2015 | 0.42  | 0.12 | 1.115092 | 1.2434303 | 20.85951 | 0.051781 | 33.36   |
| 300033 | 2015 | 0.596 | 0.12 | 1.115092 | 1.2434303 | 21.99251 | 0.302158 | 36      |
| 603806 | 2015 | 0.172 | 0.12 | 1.115092 | 1.2434303 | 22.29914 | 0.151643 | 56.29   |
| 2637   | 2015 | 0.027 | 0.12 | 1.115092 | 1.2434303 | 21.49593 | 0.014794 | 11.97   |
| 925    | 2015 | 0.771 | 0.12 | 1.115092 | 1.2434303 | 22.18388 | 0.014083 | 19.56   |
| 300250 | 2015 | 0.429 | 0.12 | 1.115092 | 1.2434303 | 20.67245 | 0.084537 | 47.85   |
| 600987 | 2015 | -0.73 | 0.12 | 1.115092 | 1.2434303 | 22.11843 | 0.181792 | 32.9    |
| 2415   | 2015 | 0.846 | 0.12 | 1.115092 | 1.2434303 | 24.13496 | 0.302158 | 39.91   |
| 909    | 2015 | 5E-04 | 0.12 | 1.115092 | 1.2434303 | 22.20378 | 0.026295 | 47.7    |
| 300020 | 2015 | -0.15 | 0.12 | 1.115092 | 1.2434303 | 22.32756 | 0.037004 | 25.89   |
| 2488   | 2015 | -0.41 | 0.12 | 1.115092 | 1.2434303 | 22.00653 | 0.026898 | 16.59   |
| 2444   | 2015 | -0.62 | 0.12 | 1.115092 | 1.2434303 | 22.4327  | 0.116898 | 48.22   |

|        |      |       |      |          |           |          |          |         |
|--------|------|-------|------|----------|-----------|----------|----------|---------|
| 2247   | 2015 | -0.08 | 0.12 | 1.115092 | 1.2434303 | 21.0113  | 0.080016 | 18.51   |
| 300244 | 2015 | 0.035 | 0.12 | 1.115092 | 1.2434303 | 21.55277 | 0.168856 | 37.69   |
| 2115   | 2015 | 0.332 | 0.12 | 1.115092 | 1.2434303 | 21.39025 | 0.019779 | 19.35   |
| 2418   | 2015 | -0.18 | 0.12 | 1.115092 | 1.2434303 | 22.13308 | 0.046313 | 15.58   |
| 603806 | 2015 | 0.128 | 0.12 | 1.115092 | 1.2434303 | 22.29914 | 0.151643 | 56.29   |
| 300025 | 2015 | -0.46 | 0.12 | 1.115092 | 1.2434303 | 20.8994  | 0.128245 | 14.05   |
| 2236   | 2015 | 0.961 | 0.12 | 1.115092 | 1.2434303 | 23.16592 | 0.210332 | 41.25   |
| 2122   | 2015 | -0.67 | 0.12 | 1.115092 | 1.2434303 | 22.74549 | 0.010707 | 42.86   |
| 600571 | 2015 | 0.618 | 0.12 | 1.115092 | 1.2434303 | 21.18033 | 0.122655 | 19.58   |
| 2122   | 2015 | -0.29 | 0.12 | 1.115092 | 1.2434303 | 22.74549 | 0.010707 | 42.86   |
| 600460 | 2015 | 0.028 | 0.12 | 1.115092 | 1.2434303 | 22.19137 | 0.017185 | 41.17   |
| 300266 | 2015 | -0.48 | 0.12 | 1.115092 | 1.2434303 | 21.35613 | 0.08769  | 38.31   |
| 300244 | 2015 | -0.28 | 0.12 | 1.115092 | 1.2434303 | 21.55277 | 0.168856 | 37.69   |
| 300145 | 2015 | -0.65 | 0.12 | 1.115092 | 1.2434303 | 22.40279 | 0.077632 | 29.19   |
| 2493   | 2015 | -0.64 | 0.12 | 1.115092 | 1.2434303 | 24.3469  | 0.022403 | 74.18   |
| 600571 | 2015 | 0.344 | 0.12 | 1.115092 | 1.2434303 | 21.18033 | 0.122655 | 19.58   |
| 300266 | 2015 | -0.26 | 0.12 | 1.115092 | 1.2434303 | 21.35613 | 0.08769  | 38.31   |
| 300244 | 2015 | 0.722 | 0.12 | 1.115092 | 1.2434303 | 21.55277 | 0.168856 | 37.69   |
| 2122   | 2015 | -0.67 | 0.12 | 1.115092 | 1.2434303 | 22.74549 | 0.010707 | 42.86   |
| 600776 | 2015 | -0.03 | 0.12 | 1.115092 | 1.2434303 | 22.03627 | 0.056478 | 45.4389 |
| 600677 | 2015 | -0.42 | 0.12 | 1.115092 | 1.2434303 | 22.85956 | 0.023352 | 19.2    |
| 300266 | 2015 | -0.48 | 0.12 | 1.115092 | 1.2434303 | 21.35613 | 0.08769  | 38.31   |
| 300300 | 2015 | 0.694 | 0.12 | 1.115092 | 1.2434303 | 21.20433 | 0.099602 | 43.1    |
| 300145 | 2015 | -0.01 | 0.12 | 1.115092 | 1.2434303 | 22.40279 | 0.077632 | 29.19   |
| 925    | 2015 | 0.881 | 0.12 | 1.115092 | 1.2434303 | 22.18388 | 0.014083 | 19.56   |
| 2095   | 2015 | 0.074 | 0.12 | 1.115092 | 1.2434303 | 20.19876 | 0.035274 | 48.75   |
| 2019   | 2015 | -0.21 | 0.12 | 1.115092 | 1.2434303 | 22.23768 | 0.125656 | 47.35   |
| 300020 | 2015 | 0.554 | 0.12 | 1.115092 | 1.2434303 | 22.32756 | 0.037004 | 25.89   |
| 600460 | 2015 | 0.396 | 0.12 | 1.115092 | 1.2434303 | 22.19137 | 0.017185 | 41.17   |
| 2122   | 2015 | -0.67 | 0.12 | 1.115092 | 1.2434303 | 22.74549 | 0.010707 | 42.86   |
| 2364   | 2015 | 0.367 | 0.12 | 1.115092 | 1.2434303 | 21.21579 | 0.118533 | 38.3    |
| 300145 | 2015 | -0.4  | 0.12 | 1.115092 | 1.2434303 | 22.40279 | 0.077632 | 29.19   |
| 600460 | 2015 | 0.592 | 0.12 | 1.115092 | 1.2434303 | 22.19137 | 0.017185 | 41.17   |
| 300244 | 2015 | 0.447 | 0.12 | 1.115092 | 1.2434303 | 21.55277 | 0.168856 | 37.69   |
| 2280   | 2015 | 1.219 | 0.12 | 1.115092 | 1.2434303 | 21.89936 | 0.278174 | 27.79   |
| 2552   | 2015 | -0.34 | 0.12 | 1.115092 | 1.2434303 | 20.95932 | 0.005252 | 32.83   |
| 963    | 2015 | -0.05 | 0.12 | 1.115092 | 1.2434303 | 23.15839 | 0.302158 | 35.5    |
| 601177 | 2015 | -0.47 | 0.12 | 1.115092 | 1.2434303 | 22.10469 | -0.06627 | 45.01   |
| 2415   | 2015 | 0.561 | 0.12 | 1.115092 | 1.2434303 | 24.13496 | 0.302158 | 39.91   |
| 909    | 2015 | 0.045 | 0.12 | 1.115092 | 1.2434303 | 20.46299 | 0.026295 | 47.7    |
| 300250 | 2015 | 0.429 | 0.12 | 1.115092 | 1.2434303 | 20.56289 | 0.084537 | 47.85   |
| 600987 | 2015 | -0.38 | 0.12 | 1.115092 | 1.2434303 | 22.11843 | 0.181792 | 32.9    |
| 300360 | 2015 | -0.29 | 0.12 | 1.115092 | 1.2434303 | 21.20578 | 0.218381 | 25.76   |
| 300360 | 2015 | -0.29 | 0.12 | 1.115092 | 1.2434303 | 21.20578 | 0.218381 | 25.76   |
| 2415   | 2015 | 0.846 | 0.12 | 1.115092 | 1.2434303 | 24.13496 | 0.302158 | 39.91   |
| 300078 | 2015 | 0.81  | 0.12 | 1.115092 | 1.2434303 | 21.62218 | 0.107554 | 26.93   |
| 2276   | 2015 | -0.35 | 0.12 | 1.115092 | 1.2434303 | 22.12498 | 0.09005  | 44.72   |
| 300068 | 2015 | -0.24 | 0.12 | 1.115092 | 1.2434303 | 22.34771 | 0.083132 | 19.67   |
| 600677 | 2015 | -0.01 | 0.12 | 1.115092 | 1.2434303 | 22.28521 | 0.023352 | 19.2    |
| 2430   | 2015 | -0.55 | 0.12 | 1.115092 | 1.2434303 | 22.99855 | 0.039443 | 61.49   |
| 2236   | 2015 | 1.162 | 0.12 | 1.115092 | 1.2434303 | 23.16592 | 0.210332 | 41.25   |
| 300300 | 2015 | 0.694 | 0.12 | 1.115092 | 1.2434303 | 21.20433 | 0.099602 | 43.1    |
| 2534   | 2015 | -0.28 | 0.12 | 1.115092 | 1.2434303 | 22.46036 | -0.07164 | 40      |
| 2534   | 2015 | -0.12 | 0.12 | 1.115092 | 1.2434303 | 22.46036 | -0.07164 | 40      |

|        |      |       |      |          |           |          |          |       |
|--------|------|-------|------|----------|-----------|----------|----------|-------|
| 2534   | 2015 | -0.28 | 0.12 | 1.115092 | 1.2434303 | 22.46036 | -0.07164 | 40    |
| 963    | 2015 | -0.05 | 0.12 | 1.115092 | 1.2434303 | 23.15839 | 0.302158 | 35.5  |
| 2534   | 2015 | -0.28 | 0.12 | 1.115092 | 1.2434303 | 22.46036 | -0.07164 | 40    |
| 909    | 2015 | 5E-04 | 0.12 | 1.115092 | 1.2434303 | 22.20378 | 0.026295 | 47.7  |
| 300266 | 2015 | -0.48 | 0.12 | 1.115092 | 1.2434303 | 21.35613 | 0.08769  | 38.31 |
| 2276   | 2015 | -0.23 | 0.12 | 1.115092 | 1.2434303 | 22.34145 | 0.09005  | 44.72 |
| 2280   | 2015 | 0.587 | 0.12 | 1.115092 | 1.2434303 | 21.89936 | 0.278174 | 27.79 |
| 300360 | 2015 | -0.29 | 0.12 | 1.115092 | 1.2434303 | 21.20578 | 0.218381 | 25.76 |
| 600477 | 2015 | -0.66 | 0.12 | 1.115092 | 1.2434303 | 22.58315 | 0.071959 | 43.87 |
| 300270 | 2015 | 1.243 | 0.12 | 1.115092 | 1.2434303 | 20.46918 | 0.071003 | 57.46 |
| 300266 | 2015 | -0.48 | 0.12 | 1.115092 | 1.2434303 | 20.8875  | 0.08769  | 38.31 |
| 559    | 2015 | -0.63 | 0.12 | 1.115092 | 1.2434303 | 23.26855 | 0.183056 | 51.53 |
| 600571 | 2015 | 0.675 | 0.12 | 1.115092 | 1.2434303 | 21.18033 | 0.122655 | 19.58 |
| 601177 | 2015 | -0.09 | 0.12 | 1.115092 | 1.2434303 | 22.10469 | -0.06627 | 45.01 |
| 300113 | 2015 | 1.793 | 0.12 | 1.115092 | 1.2434303 | 21.36979 | 0.208421 | 44.13 |
| 300300 | 2015 | 0.725 | 0.12 | 1.115092 | 1.2434303 | 21.20433 | 0.099602 | 43.1  |
| 2266   | 2015 | -0.18 | 0.12 | 1.115092 | 1.2434303 | 22.37429 | 0.032013 | 20.01 |
| 559    | 2015 | -0.36 | 0.12 | 1.115092 | 1.2434303 | 23.26855 | 0.183056 | 51.53 |
| 600571 | 2015 | 0.624 | 0.12 | 1.115092 | 1.2434303 | 21.18033 | 0.122655 | 19.58 |
| 300300 | 2015 | 0.782 | 0.12 | 1.115092 | 1.2434303 | 21.16653 | 0.099602 | 43.1  |
| 600596 | 2015 | 0.26  | 0.12 | 1.115092 | 1.2434303 | 22.7824  | -0.05936 | 14.98 |
| 2236   | 2015 | 0.961 | 0.12 | 1.115092 | 1.2434303 | 23.16592 | 0.210332 | 41.25 |
| 2479   | 2015 | -0.62 | 0.12 | 1.115092 | 1.2434303 | 22.33027 | 0.074368 | 38    |
| 300145 | 2015 | -0.4  | 0.12 | 1.115092 | 1.2434303 | 22.25139 | 0.077632 | 29.19 |
| 2552   | 2015 | 0.772 | 0.12 | 1.115092 | 1.2434303 | 20.95932 | 0.005252 | 32.83 |
| 2552   | 2015 | 0.139 | 0.12 | 1.115092 | 1.2434303 | 20.95932 | 0.005252 | 32.83 |
| 300078 | 2015 | 0.24  | 0.12 | 1.115092 | 1.2434303 | 21.62218 | 0.107554 | 26.93 |
| 300250 | 2015 | 0.429 | 0.12 | 1.115092 | 1.2434303 | 20.67245 | 0.084537 | 47.85 |
| 600677 | 2015 | -0.35 | 0.12 | 1.115092 | 1.2434303 | 22.85956 | 0.023352 | 19.2  |
| 2570   | 2015 | -0.29 | 0.12 | 1.115092 | 1.24E+00  | 22.3954  | 0.024401 | 33.06 |
| 2570   | 2015 | -0.29 | 0.12 | 1.115092 | 1.24E+00  | 22.3954  | 0.024401 | 33.06 |
| 2570   | 2015 | -0.1  | 0.12 | 1.115092 | 1.24E+00  | 22.3954  | 0.024401 | 33.06 |
| 300250 | 2015 | 0.429 | 0.12 | 1.115092 | 1.24E+00  | 20.67245 | 0.084537 | 47.85 |
| 600987 | 2015 | -0.73 | 0.12 | 1.115092 | 1.24E+00  | 22.11843 | 0.181792 | 32.9  |
| 2284   | 2015 | -0.44 | 0.12 | 1.115092 | 1.2434303 | 22.07977 | 0.056598 | 38.8  |
| 2115   | 2015 | 0.326 | 0.12 | 1.115092 | 1.2434303 | 21.44975 | 0.019779 | 19.35 |
| 963    | 2015 | -0.05 | 0.12 | 1.115092 | 1.2434303 | 23.15839 | 0.302158 | 35.5  |
| 300203 | 2015 | -0.18 | 0.12 | 1.115092 | 1.2434303 | 22.13753 | 0.110131 | 24.61 |
| 300266 | 2015 | -0.1  | 0.12 | 1.115092 | 1.2434303 | 21.35613 | 0.08769  | 38.31 |
| 2247   | 2015 | -0.34 | 0.12 | 1.115092 | 1.2434303 | 21.0113  | 0.080016 | 18.51 |
| 2019   | 2015 | -0.29 | 0.12 | 1.115092 | 1.2434303 | 22.23768 | 0.125656 | 47.35 |
| 300068 | 2015 | -0.23 | 0.12 | 1.115092 | 1.2434303 | 22.65944 | 0.083132 | 19.67 |
| 300025 | 2015 | -0.46 | 0.12 | 1.115092 | 1.2434303 | 20.8994  | 0.128245 | 14.05 |
| 925    | 2015 | 0.768 | 0.12 | 1.115092 | 1.2434303 | 22.18388 | 0.014083 | 19.56 |
| 300020 | 2015 | 0.459 | 0.12 | 1.115092 | 1.2434303 | 22.32756 | 0.037004 | 25.89 |
| 2266   | 2015 | -0.3  | 0.12 | 1.115092 | 1.2434303 | 22.37429 | 0.032013 | 20.01 |
| 2444   | 2015 | 0.04  | 0.12 | 1.115092 | 1.2434303 | 22.4327  | 0.116898 | 48.22 |
| 300203 | 2015 | 0.708 | 0.12 | 1.115092 | 1.2434303 | 22.13753 | 0.110131 | 24.61 |
| 600477 | 2015 | -0.66 | 0.12 | 1.115092 | 1.2434303 | 22.58315 | 0.071959 | 43.87 |
| 963    | 2015 | -0.05 | 0.12 | 1.115092 | 1.2434303 | 23.15839 | 0.302158 | 35.5  |
| 559    | 2015 | -0.32 | 0.12 | 1.115092 | 1.2434303 | 23.26855 | 0.183056 | 51.53 |
| 300203 | 2015 | 0.351 | 0.12 | 1.115092 | 1.2434303 | 21.9155  | 0.110131 | 24.61 |
| 2444   | 2015 | -0.5  | 0.12 | 1.115092 | 1.2434303 | 22.4327  | 0.116898 | 48.22 |
| 2284   | 2015 | -0.62 | 0.12 | 1.115092 | 1.2434303 | 22.17068 | 0.056598 | 38.8  |

|        |      |       |      |          |           |          |          |         |
|--------|------|-------|------|----------|-----------|----------|----------|---------|
| 559    | 2015 | -0.48 | 0.12 | 1.115092 | 1.2434303 | 23.26855 | 0.183056 | 51.53   |
| 2280   | 2015 | 1.273 | 0.12 | 1.115092 | 1.2434303 | 21.34257 | 0.278174 | 27.79   |
| 300078 | 2015 | 0.586 | 0.12 | 1.115092 | 1.2434303 | 21.62218 | 0.107554 | 26.93   |
| 600571 | 2015 | 0.344 | 0.12 | 1.115092 | 1.2434303 | 21.18033 | 0.122655 | 19.58   |
| 300266 | 2015 | -0.48 | 0.12 | 1.115092 | 1.2434303 | 21.35613 | 0.08769  | 38.31   |
| 2444   | 2015 | -0.5  | 0.12 | 1.115092 | 1.2434303 | 22.4327  | 0.116898 | 48.22   |
| 2276   | 2015 | -0.47 | 0.12 | 1.115092 | 1.2434303 | 22.34145 | 0.09005  | 44.72   |
| 300078 | 2015 | 0.258 | 0.12 | 1.115092 | 1.2434303 | 21.62218 | 0.107554 | 26.93   |
| 2625   | 2015 | -0.14 | 0.12 | 1.115092 | 1.2434303 | 20.37188 | 0.076243 | 18.23   |
| 2637   | 2015 | -0.06 | 0.12 | 1.115092 | 1.2434303 | 21.49593 | 0.014794 | 11.97   |
| 2444   | 2015 | -0.09 | 0.12 | 1.115092 | 1.2434303 | 22.4327  | 0.116898 | 48.22   |
| 2280   | 2015 | 1.245 | 0.12 | 1.115092 | 1.2434303 | 21.89936 | 0.278174 | 27.79   |
| 600571 | 2015 | 0.344 | 0.12 | 1.115092 | 1.2434303 | 21.18033 | 0.122655 | 19.58   |
| 2418   | 2015 | -0.51 | 0.12 | 1.115092 | 1.2434303 | 22.13308 | 0.046313 | 15.58   |
| 2479   | 2015 | -0.75 | 0.12 | 1.115092 | 1.2434303 | 22.33027 | 0.074368 | 38      |
| 2534   | 2015 | -0.12 | 0.12 | 1.115092 | 1.2434303 | 22.46036 | -0.07164 | 40      |
| 600596 | 2015 | -0.09 | 0.12 | 1.115092 | 1.2434303 | 22.7824  | -0.05936 | 14.98   |
| 2247   | 2015 | -0.06 | 0.12 | 1.115092 | 1.2434303 | 21.0113  | 0.080016 | 18.51   |
| 2493   | 2015 | 0.547 | 0.12 | 1.115092 | 1.2434303 | 24.3469  | 0.022403 | 74.18   |
| 2493   | 2015 | -0.78 | 0.12 | 1.115092 | 1.2434303 | 23.46519 | 0.022403 | 74.18   |
| 300113 | 2015 | 1.793 | 0.12 | 1.115092 | 1.2434303 | 21.36979 | 0.208421 | 44.13   |
| 600460 | 2015 | 0.452 | 0.12 | 1.115092 | 1.2434303 | 22.19137 | 0.017185 | 41.17   |
| 2552   | 2015 | 0.331 | 0.12 | 1.115092 | 1.2434303 | 20.94382 | 0.005252 | 32.83   |
| 600797 | 2015 | 0.071 | 0.12 | 1.115092 | 1.2434303 | 21.7579  | 0.107701 | 19.65   |
| 300113 | 2015 | 1.93  | 0.12 | 1.115092 | 1.2434303 | 21.26188 | 0.208421 | 44.13   |
| 2488   | 2015 | -0.41 | 0.12 | 1.115092 | 1.2434303 | 22.03653 | 0.026898 | 16.59   |
| 2115   | 2015 | -0.12 | 0.12 | 1.115092 | 1.2434303 | 21.44975 | 0.019779 | 19.35   |
| 300025 | 2015 | -0.46 | 0.12 | 1.115092 | 1.2434303 | 20.8994  | 0.128245 | 14.05   |
| 2019   | 2015 | -0.85 | 0.12 | 1.115092 | 1.2434303 | 22.23768 | 0.125656 | 47.35   |
| 963    | 2015 | -0.05 | 0.12 | 1.115092 | 1.2434303 | 23.15839 | 0.302158 | 35.5    |
| 300270 | 2015 | 1.243 | 0.12 | 1.115092 | 1.2434303 | 20.4751  | 0.071003 | 57.46   |
| 2430   | 2015 | -0.36 | 0.12 | 1.115092 | 1.2434303 | 22.99855 | 0.039443 | 61.49   |
| 2276   | 2015 | -0.63 | 0.12 | 1.115092 | 1.2434303 | 22.34145 | 0.09005  | 44.72   |
| 2284   | 2015 | -0.49 | 0.12 | 1.115092 | 1.2434303 | 22.07977 | 0.056598 | 38.8    |
| 600460 | 2015 | 0.347 | 0.12 | 1.115092 | 1.2434303 | 22.19137 | 0.017185 | 41.17   |
| 2444   | 2015 | -0.36 | 0.12 | 1.115092 | 1.2434303 | 22.4327  | 0.116898 | 48.22   |
| 600596 | 2015 | -0.37 | 0.12 | 1.115092 | 1.2434303 | 22.7824  | -0.05936 | 14.98   |
| 2122   | 2015 | -0.26 | 0.12 | 1.115092 | 1.2434303 | 22.74549 | 0.010707 | 42.86   |
| 2276   | 2015 | -0.52 | 0.12 | 1.115092 | 1.2434303 | 22.34145 | 0.09005  | 44.72   |
| 600571 | 2015 | 0.344 | 0.12 | 1.115092 | 1.2434303 | 20.95636 | 0.122655 | 19.58   |
| 2430   | 2015 | 0.116 | 0.12 | 1.115092 | 1.2434303 | 22.99855 | 0.039443 | 61.49   |
| 600477 | 2015 | -0.54 | 0.12 | 1.115092 | 1.2434303 | 22.02189 | 0.071959 | 43.87   |
| 300078 | 2015 | 0.258 | 0.12 | 1.115092 | 1.24E+00  | 21.62218 | 0.107554 | 26.93   |
| 603806 | 2015 | 0.172 | 0.12 | 1.115092 | 1.24E+00  | 22.29914 | 0.151643 | 56.29   |
| 2236   | 2015 | 0.961 | 0.12 | 1.115092 | 1.24E+00  | 23.16592 | 0.210332 | 41.25   |
| 600776 | 2015 | 0.483 | 0.12 | 1.115092 | 1.24E+00  | 22.03627 | 0.056478 | 45.4389 |
| 2444   | 2015 | -0.5  | 0.12 | 1.115092 | 1.24E+00  | 22.4327  | 0.116898 | 48.22   |
| 300244 | 2015 | 0.035 | 0.12 | 1.115092 | 1.24E+00  | 20.9725  | 0.168856 | 37.69   |
| 2276   | 2015 | -0.41 | 0.12 | 1.115092 | 1.24E+00  | 22.34145 | 0.09005  | 44.72   |
| 2019   | 2015 | -0.04 | 0.12 | 1.115092 | 1.2434303 | 21.89268 | 0.125656 | 47.35   |
| 2570   | 2015 | -0.29 | 0.12 | 1.115092 | 1.2434303 | 22.21644 | 0.024401 | 33.06   |
| 559    | 2015 | -0.25 | 0.12 | 1.115092 | 1.2434303 | 22.81633 | 0.183056 | 51.53   |
| 601177 | 2015 | -0.4  | 0.12 | 1.115092 | 1.2434303 | 22.10469 | -0.06627 | 45.01   |
| 2276   | 2015 | -0.42 | 0.12 | 1.115092 | 1.2434303 | 22.34145 | 0.09005  | 44.72   |

|        |      |       |      |          |           |          |          |       |
|--------|------|-------|------|----------|-----------|----------|----------|-------|
| 300020 | 2015 | 0.517 | 0.12 | 1.115092 | 1.2434303 | 22.32756 | 0.037004 | 25.89 |
| 601177 | 2015 | -0.38 | 0.12 | 1.115092 | 1.2434303 | 22.10469 | -0.06627 | 45.01 |
| 600987 | 2015 | -0.38 | 0.12 | 1.115092 | 1.2434303 | 21.56014 | 0.181792 | 32.9  |
| 2418   | 2015 | -0.38 | 0.12 | 1.115092 | 1.2434303 | 22.13308 | 0.046313 | 15.58 |
| 600477 | 2015 | -0.66 | 0.12 | 1.115092 | 1.2434303 | 22.58315 | 0.071959 | 43.87 |
| 2430   | 2015 | -0.22 | 0.12 | 1.115092 | 1.2434303 | 22.99855 | 0.039443 | 61.49 |
| 2266   | 2015 | 0.351 | 0.12 | 1.115092 | 1.2434303 | 22.37429 | 0.032013 | 20.01 |
| 300020 | 2015 | -0.15 | 0.12 | 1.115092 | 1.2434303 | 22.32756 | 0.037004 | 25.89 |
| 300266 | 2015 | -0.26 | 0.12 | 1.115092 | 1.2434303 | 21.35613 | 0.08769  | 38.31 |
| 600460 | 2015 | 0.028 | 0.12 | 1.115092 | 1.2434303 | 22.19137 | 0.017185 | 41.17 |
| 300203 | 2015 | 0.425 | 0.12 | 1.115092 | 1.2434303 | 22.13753 | 0.110131 | 24.61 |
| 601177 | 2015 | -0.09 | 0.12 | 1.115092 | 1.2434303 | 22.10469 | -0.06627 | 45.01 |
| 300360 | 2015 | -0.29 | 0.12 | 1.115092 | 1.2434303 | 21.20578 | 0.218381 | 25.76 |
| 559    | 2015 | -0.19 | 0.12 | 1.115092 | 1.2434303 | 23.26855 | 0.183056 | 51.53 |
| 300020 | 2015 | 0.836 | 0.12 | 1.115092 | 1.2434303 | 22.32756 | 0.037004 | 25.89 |
| 559    | 2015 | -0.17 | 0.12 | 1.115092 | 1.2434303 | 23.26855 | 0.183056 | 51.53 |
| 925    | 2015 | 0.755 | 0.12 | 1.115092 | 1.2434303 | 22.18388 | 0.014083 | 19.56 |
| 963    | 2015 | -0.05 | 0.12 | 1.115092 | 1.2434303 | 23.15839 | 0.302158 | 35.5  |
| 300113 | 2015 | 1.428 | 0.12 | 1.115092 | 1.2434303 | 21.36979 | 0.208421 | 44.13 |
| 925    | 2015 | 0.771 | 0.12 | 1.115092 | 1.2434303 | 22.18388 | 0.014083 | 19.56 |
| 601177 | 2015 | -0.09 | 0.12 | 1.115092 | 1.2434303 | 22.10469 | -0.06627 | 45.01 |
| 2430   | 2015 | -0.55 | 0.12 | 1.115092 | 1.2434303 | 22.99855 | 0.039443 | 61.49 |
| 2488   | 2015 | -0.41 | 0.12 | 1.115092 | 1.2434303 | 22.03653 | 0.026898 | 16.59 |
| 300250 | 2015 | 0.429 | 0.12 | 1.115092 | 1.2434303 | 20.67245 | 0.084537 | 47.85 |
| 600460 | 2015 | 0.558 | 0.12 | 1.115092 | 1.2434303 | 22.19137 | 0.017185 | 41.17 |
| 925    | 2015 | 0.765 | 0.12 | 1.115092 | 1.2434303 | 22.18388 | 0.014083 | 19.56 |
| 2415   | 2015 | 0.626 | 0.12 | 1.115092 | 1.2434303 | 24.13496 | 0.302158 | 39.91 |
| 600704 | 2015 | -0.51 | 0.12 | 1.115092 | 1.2434303 | 25.0133  | 0.083521 | 33.81 |
| 600477 | 2015 | -0.66 | 0.12 | 1.115092 | 1.2434303 | 22.58315 | 0.071959 | 43.87 |
| 600477 | 2015 | -0.54 | 0.12 | 1.115092 | 1.2434303 | 22.58315 | 0.071959 | 43.87 |
| 2430   | 2015 | -0.36 | 0.12 | 1.115092 | 1.2434303 | 22.99855 | 0.039443 | 61.49 |
| 300203 | 2015 | -0.01 | 0.12 | 1.115092 | 1.2434303 | 22.13753 | 0.110131 | 24.61 |
| 300306 | 2015 | 0.376 | 0.12 | 1.115092 | 1.2434303 | 20.86719 | 0.051781 | 33.36 |
| 2570   | 2015 | -0.29 | 0.12 | 1.115092 | 1.2434303 | 22.3954  | 0.024401 | 33.06 |
| 2115   | 2015 | -0.12 | 0.12 | 1.115092 | 1.2434303 | 21.44975 | 0.019779 | 19.35 |
| 2122   | 2015 | -0.67 | 0.12 | 1.115092 | 1.2434303 | 22.74549 | 0.010707 | 42.86 |
| 300266 | 2015 | -0.48 | 0.12 | 1.115092 | 1.2434303 | 21.35613 | 0.08769  | 38.31 |
| 2122   | 2015 | -0.08 | 0.12 | 1.115092 | 1.2434303 | 22.74549 | 0.010707 | 42.86 |
| 600704 | 2015 | -0.82 | 0.12 | 1.115092 | 1.2434303 | 25.0133  | 0.083521 | 33.81 |
| 2276   | 2015 | 0.691 | 0.12 | 1.115092 | 1.2434303 | 22.34145 | 0.09005  | 44.72 |
| 2095   | 2015 | 0.074 | 0.12 | 1.115092 | 1.2434303 | 20.10336 | 0.035274 | 48.75 |
| 300306 | 2015 | 0.695 | 0.12 | 1.115092 | 1.2434303 | 20.85951 | 0.051781 | 33.36 |
| 559    | 2015 | -0.1  | 0.12 | 1.115092 | 1.2434303 | 23.26855 | 0.183056 | 51.53 |
| 2276   | 2015 | -0.63 | 0.12 | 1.115092 | 1.2434303 | 22.34145 | 0.09005  | 44.72 |
| 300033 | 2015 | 0.596 | 0.12 | 1.115092 | 1.2434303 | 21.99251 | 0.302158 | 36    |
| 2019   | 2015 | -0.21 | 0.12 | 1.115092 | 1.2434303 | 22.23768 | 0.125656 | 47.35 |
| 600460 | 2015 | 0.396 | 0.12 | 1.115092 | 1.2434303 | 22.19137 | 0.017185 | 41.17 |
| 2364   | 2015 | 0.374 | 0.12 | 1.115092 | 1.2434303 | 21.21579 | 0.118533 | 38.3  |
| 559    | 2015 | -0.3  | 0.12 | 1.115092 | 1.2434303 | 23.26855 | 0.183056 | 51.53 |
| 2479   | 2015 | -0.5  | 0.12 | 1.115092 | 1.2434303 | 21.93771 | 0.074368 | 38    |
| 600477 | 2015 | -0.59 | 0.12 | 1.115092 | 1.2434303 | 22.58315 | 0.071959 | 43.87 |
| 600477 | 2015 | -0.22 | 0.12 | 1.115092 | 1.2434303 | 22.58315 | 0.071959 | 43.87 |
| 300145 | 2015 | -0.37 | 0.12 | 1.115092 | 1.2434303 | 22.40279 | 0.077632 | 29.19 |
| 300145 | 2015 | -0.65 | 0.12 | 1.115092 | 1.2434303 | 22.40279 | 0.077632 | 29.19 |

|        |      |       |      |          |            |          |          |       |
|--------|------|-------|------|----------|------------|----------|----------|-------|
| 2418   | 2015 | -0.72 | 0.12 | 1.115092 | 1.2434303  | 22.13308 | 0.046313 | 15.58 |
| 600677 | 2015 | -0.01 | 0.12 | 1.115092 | 1.2434303  | 22.85956 | 0.023352 | 19.2  |
| 2019   | 2015 | 0.022 | 0.12 | 1.115092 | 1.2434303  | 22.23768 | 0.125656 | 47.35 |
| 600677 | 2015 | -0.35 | 0.12 | 1.115092 | 1.2434303  | 22.85956 | 0.023352 | 19.2  |
| 2430   | 2015 | -0.22 | 0.12 | 1.115092 | 1.2434303  | 22.99855 | 0.039443 | 61.49 |
| 2493   | 2015 | 0.547 | 0.12 | 1.115092 | 1.2434303  | 24.3469  | 0.022403 | 74.18 |
| 600704 | 2015 | -0.99 | 0.12 | 1.115092 | 1.2434303  | 25.0133  | 0.083521 | 33.81 |
| 559    | 2015 | -0.63 | 0.12 | 1.115092 | 1.2434303  | 23.26855 | 0.183056 | 51.53 |
| 300250 | 2015 | 0.429 | 0.12 | 1.115092 | 1.2434303  | 20.67245 | 0.084537 | 47.85 |
| 600797 | 2015 | 0.402 | 0.12 | 1.115092 | 1.2434303  | 22.17684 | 0.107701 | 19.65 |
| 300203 | 2015 | 0.377 | 0.12 | 1.115092 | 1.2434303  | 22.13753 | 0.110131 | 24.61 |
| 2418   | 2015 | -0.72 | 0.12 | 1.115092 | 1.2434303  | 22.13308 | 0.046313 | 15.58 |
| 600460 | 2015 | 0.592 | 0.12 | 1.115092 | 1.2434303  | 22.19137 | 0.017185 | 41.17 |
| 600677 | 2015 | -0.35 | 0.12 | 1.115092 | 1.2434303  | 22.85956 | 0.023352 | 19.2  |
| 559    | 2015 | -0.19 | 0.12 | 1.115092 | 1.2434303  | 23.26855 | 0.183056 | 51.53 |
| 300203 | 2015 | 0.708 | 0.12 | 1.115092 | 1.2434303  | 22.13753 | 0.110131 | 24.61 |
| 600460 | 2015 | 0.028 | 0.12 | 1.115092 | 1.2434303  | 22.19137 | 0.017185 | 41.17 |
| 300250 | 2015 | 0.429 | 0.12 | 1.115092 | 1.2434303  | 20.67245 | 0.084537 | 47.85 |
| 300203 | 2015 | 0.708 | 0.12 | 1.115092 | 1.2434303  | 22.13753 | 0.110131 | 24.61 |
| 300360 | 2015 | -0.29 | 0.12 | 1.115092 | 1.2434303  | 21.1521  | 0.218381 | 25.76 |
| 2019   | 2015 | -0.07 | 0.12 | 1.115092 | 1.2434303  | 22.23768 | 0.125656 | 47.35 |
| 601177 | 2015 | -0.09 | 0.12 | 1.115092 | 1.2434303  | 22.10469 | -0.06627 | 45.01 |
| 2115   | 2015 | 0.326 | 0.12 | 1.115092 | 1.2434303  | 21.44975 | 0.019779 | 19.35 |
| 600249 | 2015 | -0.66 | 0.1  | 0.259511 | 0.06734594 | 22.10159 | -0.10497 | 33.34 |
| 528    | 2015 | -0.18 | 0.1  | 0.259511 | 0.06734594 | 23.73804 | 0.002331 | 34.98 |
| 528    | 2015 | 0.008 | 0.1  | 0.259511 | 0.06734594 | 23.73804 | 0.002331 | 34.98 |
| 600423 | 2015 | -0.63 | 0.1  | 0.259511 | 0.06734594 | 22.28946 | -0.4336  | 29.55 |
| 600249 | 2015 | 0.557 | 0.1  | 0.259511 | 0.06734594 | 22.10159 | -0.10497 | 33.34 |
| 600423 | 2015 | -0.63 | 0.1  | 0.259511 | 0.06734594 | 22.28946 | -0.4336  | 29.55 |
| 528    | 2015 | -0.47 | 0.1  | 0.259511 | 0.06734594 | 23.73804 | 0.002331 | 34.98 |
| 600249 | 2015 | 0.213 | 0.1  | 0.259511 | 0.06734594 | 22.10159 | -0.10497 | 33.34 |
| 528    | 2015 | -0.47 | 0.1  | 0.259511 | 0.06734594 | 23.73804 | 0.002331 | 34.98 |
| 528    | 2015 | 0.018 | 0.1  | 0.259511 | 0.06734594 | 23.73804 | 0.002331 | 34.98 |
| 601003 | 2015 | -0.54 | 0.1  | 0.259511 | 0.06734594 | 23.84238 | -0.268   | 74.18 |
| 600423 | 2015 | -0.31 | 0.1  | 0.259511 | 0.06734594 | 22.28946 | -0.4336  | 29.55 |
| 528    | 2015 | -0.47 | 0.1  | 0.259511 | 0.06734594 | 23.73804 | 0.002331 | 34.98 |
| 528    | 2015 | -0.47 | 0.1  | 0.259511 | 0.06734594 | 23.73804 | 0.002331 | 34.98 |
| 600249 | 2015 | 0.222 | 0.1  | 0.259511 | 0.06734594 | 21.87366 | -0.10497 | 33.34 |
| 528    | 2015 | -0.14 | 0.1  | 0.259511 | 0.06734594 | 23.73804 | 0.002331 | 34.98 |
| 600249 | 2015 | -0.08 | 0.1  | 0.259511 | 0.06734594 | 22.10159 | -0.10497 | 33.34 |
| 601003 | 2015 | -0.54 | 0.1  | 0.259511 | 0.06734594 | 23.84238 | -0.268   | 74.18 |
| 528    | 2015 | 0.168 | 0.1  | 0.259511 | 0.06734594 | 23.73804 | 0.002331 | 34.98 |
| 601003 | 2015 | -0.54 | 0.1  | 0.259511 | 0.06734594 | 23.84238 | -0.268   | 74.18 |
| 528    | 2015 | -0.28 | 0.1  | 0.259511 | 0.06734594 | 23.46866 | 0.002331 | 34.98 |
| 600249 | 2015 | -0.2  | 0.1  | 0.259511 | 0.06734594 | 22.10159 | -0.10497 | 33.34 |
| 528    | 2015 | 0.018 | 0.1  | 0.259511 | 0.06734594 | 23.73804 | 0.002331 | 34.98 |
| 600423 | 2015 | -0.31 | 0.1  | 0.259511 | 0.06734594 | 22.28946 | -0.4336  | 29.55 |
| 528    | 2015 | -0    | 0.1  | 0.259511 | 0.06734594 | 23.73804 | 0.002331 | 34.98 |
| 600249 | 2015 | 0.557 | 0.1  | 0.259511 | 0.06734594 | 22.10159 | -0.10497 | 33.34 |
| 528    | 2015 | -0.01 | 0.1  | 0.259511 | 0.06734594 | 23.73804 | 0.002331 | 34.98 |
| 600249 | 2015 | -0.77 | 0.1  | 0.259511 | 0.06734594 | 22.10159 | -0.10497 | 33.34 |
| 528    | 2015 | 0.003 | 0.1  | 0.259511 | 0.06734594 | 23.73804 | 0.002331 | 34.98 |
| 600249 | 2015 | 0.222 | 0.1  | 0.259511 | 0.06734594 | 22.10159 | -0.10497 | 33.34 |
| 600423 | 2015 | -0.47 | 0.1  | 0.259511 | 0.06734594 | 22.1639  | -0.4336  | 29.55 |

|        |      |       |      |          |            |          |          |       |
|--------|------|-------|------|----------|------------|----------|----------|-------|
| 528    | 2015 | -0.04 | 0.1  | 0.259511 | 0.06734594 | 23.73804 | 0.002331 | 34.98 |
| 2567   | 2015 | -0.76 | 1.03 | 0.336472 | 0.11321357 | 22.11732 | 0.055574 | 23.7  |
| 600458 | 2015 | -0.41 | 1.03 | 0.336472 | 0.11321357 | 23.29467 | 0.054292 | 36.43 |
| 600458 | 2015 | 0.211 | 1.03 | 0.336472 | 0.11321357 | 23.29467 | 0.054292 | 36.43 |
| 600458 | 2015 | 0.211 | 1.03 | 0.336472 | 0.11321357 | 23.29467 | 0.054292 | 36.43 |
| 600479 | 2015 | -0.78 | 1.03 | 0.336472 | 0.11321357 | 21.7324  | 0.044977 | 26.16 |
| 600961 | 2015 | 0.075 | 1.03 | 0.336472 | 0.11321357 | 22.45036 | -0.4336  | 40.24 |
| 600458 | 2015 | -0.19 | 1.03 | 0.336472 | 0.11321357 | 23.29467 | 0.054292 | 36.43 |
| 2567   | 2015 | -0.61 | 1.03 | 0.336472 | 0.11321357 | 21.96403 | 0.055574 | 23.7  |
| 600458 | 2015 | 0.211 | 1.03 | 0.336472 | 0.11321357 | 23.29467 | 0.054292 | 36.43 |
| 601636 | 2015 | -0.3  | 1.03 | 0.336472 | 0.11321357 | 23.24499 | 0.033441 | 34.6  |
| 600479 | 2015 | -0.15 | 1.03 | 0.336472 | 0.11321357 | 21.7324  | 0.044977 | 26.16 |
| 601636 | 2015 | -0.25 | 1.03 | 0.336472 | 0.11321357 | 23.24499 | 0.033441 | 34.6  |
| 601636 | 2015 | -0.3  | 1.03 | 0.336472 | 0.11321357 | 22.22291 | 0.033441 | 34.6  |
| 2523   | 2015 | 0.078 | 1.03 | 0.336472 | 0.11321357 | 21.74983 | 0.045062 | 25.55 |
| 2523   | 2015 | -0.1  | 1.03 | 0.336472 | 0.11321357 | 21.74983 | 0.045062 | 25.55 |
| 600458 | 2015 | 0.203 | 1.03 | 0.336472 | 0.11321357 | 23.29467 | 0.054292 | 36.43 |
| 2523   | 2015 | -0.18 | 1.03 | 0.336472 | 0.11321357 | 21.74983 | 0.045062 | 25.55 |
| 600458 | 2015 | 0.914 | 1.03 | 0.336472 | 0.11321357 | 23.06277 | 0.054292 | 36.43 |
| 600479 | 2015 | -0.78 | 1.03 | 0.336472 | 0.11321357 | 21.7324  | 0.044977 | 26.16 |
| 2567   | 2015 | -0.02 | 1.03 | 0.336472 | 0.11321357 | 22.11732 | 0.055574 | 23.7  |
| 2567   | 2015 | -0.02 | 1.03 | 0.336472 | 0.11321357 | 22.11732 | 0.055574 | 23.7  |
| 601636 | 2015 | -0.09 | 1.03 | 0.336472 | 0.11321357 | 23.24499 | 0.033441 | 34.6  |
| 2523   | 2015 | 0.695 | 1.03 | 0.336472 | 0.11321357 | 21.44295 | 0.045062 | 25.55 |
| 600479 | 2015 | 0.111 | 1.03 | 0.336472 | 0.11321357 | 21.7324  | 0.044977 | 26.16 |
| 601636 | 2015 | 0.669 | 1.03 | 0.336472 | 0.11321357 | 23.24499 | 0.033441 | 34.6  |
| 2523   | 2015 | -0.29 | 1.03 | 0.336472 | 0.11321357 | 21.74983 | 0.045062 | 25.55 |
| 601636 | 2015 | 0.669 | 1.03 | 0.336472 | 0.11321357 | 23.24499 | 0.033441 | 34.6  |
| 601636 | 2015 | -0.18 | 1.03 | 0.336472 | 0.11321357 | 23.24499 | 0.033441 | 34.6  |
| 600479 | 2015 | -0.33 | 1.03 | 0.336472 | 0.11321357 | 21.7324  | 0.044977 | 26.16 |
| 600479 | 2015 | -0.29 | 1.03 | 0.336472 | 0.11321357 | 21.18478 | 0.044977 | 26.16 |
| 600458 | 2015 | 0.211 | 1.03 | 0.336472 | 0.11321357 | 23.29467 | 0.054292 | 36.43 |
| 2567   | 2015 | -0.73 | 1.03 | 0.336472 | 0.11321357 | 22.11732 | 0.055574 | 23.7  |
| 600961 | 2015 | 0.075 | 1.03 | 0.336472 | 0.11321357 | 22.4608  | -0.4336  | 40.24 |
| 601636 | 2015 | -0.25 | 1.03 | 0.336472 | 0.11321357 | 23.24499 | 0.033441 | 34.6  |
| 601636 | 2015 | -0.34 | 1.03 | 0.336472 | 0.11321357 | 23.24499 | 0.033441 | 34.6  |
| 2523   | 2015 | -0.05 | 1.03 | 0.336472 | 0.11321357 | 21.74983 | 0.045062 | 25.55 |
| 600458 | 2015 | 0.211 | 1.03 | 0.336472 | 0.11321357 | 23.29467 | 0.054292 | 36.43 |
| 2567   | 2015 | -0.79 | 1.03 | 0.336472 | 0.11321357 | 22.11732 | 0.055574 | 23.7  |
| 2523   | 2015 | 0.078 | 1.03 | 0.336472 | 0.11321357 | 21.74983 | 0.045062 | 25.55 |
| 600479 | 2015 | -0.14 | 1.03 | 0.336472 | 0.11321357 | 21.7324  | 0.044977 | 26.16 |
| 2523   | 2015 | -0.18 | 1.03 | 0.336472 | 0.11321357 | 21.74983 | 0.045062 | 25.55 |
| 2523   | 2015 | -0.18 | 1.03 | 0.336472 | 0.11321357 | 21.74983 | 0.045062 | 25.55 |
| 600961 | 2015 | 0.075 | 1.03 | 0.336472 | 0.11321357 | 22.4608  | -0.4336  | 40.24 |
| 2567   | 2015 | 0.535 | 1.03 | 0.336472 | 0.11321357 | 22.11732 | 0.055574 | 23.7  |
| 600479 | 2015 | -0.33 | 1.03 | 0.336472 | 0.11321357 | 21.7324  | 0.044977 | 26.16 |
| 600961 | 2015 | 0.075 | 1.03 | 0.336472 | 0.11321357 | 22.4608  | -0.4336  | 40.24 |
| 2175   | 2015 | -0.39 | 0.1  | 1.335924 | 1.7846924  | 21.41386 | 0.073751 | 15.22 |
| 2275   | 2015 | 0.736 | 0.1  | 1.335924 | 1.7846924  | 21.73839 | 0.160757 | 61.11 |
| 2275   | 2015 | 0.736 | 0.1  | 1.335924 | 1.7846924  | 21.73839 | 0.160757 | 61.11 |
| 603166 | 2015 | -0.47 | 0.1  | 1.335924 | 1.7846924  | 21.99991 | 0.024836 | 68.51 |
| 2175   | 2015 | -0.51 | 0.1  | 1.335924 | 1.7846924  | 21.41386 | 0.073751 | 15.22 |
| 603166 | 2015 | 0.19  | 0.1  | 1.335924 | 1.7846924  | 21.99991 | 0.024836 | 68.51 |
| 603166 | 2015 | -0.47 | 0.1  | 1.335924 | 1.7846924  | 21.99991 | 0.024836 | 68.51 |

|        |      |       |      |          |           |          |          |       |
|--------|------|-------|------|----------|-----------|----------|----------|-------|
| 2275   | 2015 | 0.736 | 0.1  | 1.335924 | 1.7846924 | 21.73839 | 0.160757 | 61.11 |
| 2166   | 2015 | 0.433 | 0.1  | 1.335924 | 1.7846924 | 21.43127 | 0.094593 | 17.57 |
| 2175   | 2015 | -0.66 | 0.1  | 1.335924 | 1.7846924 | 21.41386 | 0.073751 | 15.22 |
| 2275   | 2015 | 0.736 | 0.1  | 1.335924 | 1.7846924 | 21.73839 | 0.160757 | 61.11 |
| 603166 | 2015 | -0.14 | 0.1  | 1.335924 | 1.7846924 | 21.99991 | 0.024836 | 68.51 |
| 2175   | 2015 | -0.39 | 0.1  | 1.335924 | 1.7846924 | 21.41386 | 0.073751 | 15.22 |
| 603166 | 2015 | -0.15 | 0.1  | 1.335924 | 1.7846924 | 21.99991 | 0.024836 | 68.51 |
| 603166 | 2015 | 0.19  | 0.1  | 1.335924 | 1.7846924 | 21.99991 | 0.024836 | 68.51 |
| 603166 | 2015 | -0.47 | 0.1  | 1.335924 | 1.7846924 | 21.57227 | 0.024836 | 68.51 |
| 2275   | 2015 | 0.736 | 0.1  | 1.335924 | 1.7846924 | 21.70573 | 0.160757 | 61.11 |
| 2166   | 2015 | 0.433 | 0.1  | 1.335924 | 1.7846924 | 21.43127 | 0.094593 | 17.57 |
| 2275   | 2015 | 0.736 | 0.1  | 1.335924 | 1.7846924 | 21.73839 | 0.160757 | 61.11 |
| 2275   | 2015 | 0.736 | 0.1  | 1.335924 | 1.7846924 | 21.73839 | 0.160757 | 61.11 |
| 2166   | 2015 | 0.433 | 0.1  | 1.335924 | 1.7846924 | 20.99198 | 0.094593 | 17.57 |
| 2175   | 2015 | -0.66 | 0.1  | 1.335924 | 1.7846924 | 21.0645  | 0.073751 | 15.22 |
| 2275   | 2015 | 0.736 | 0.1  | 1.335924 | 1.7846924 | 21.73839 | 0.160757 | 61.11 |
| 2275   | 2015 | 0.736 | 0.1  | 1.335924 | 1.7846924 | 21.73839 | 0.160757 | 61.11 |
| 603166 | 2015 | -0.37 | 0.1  | 1.335924 | 1.7846924 | 21.99991 | 0.024836 | 68.51 |
| 2198   | 2015 | -0.11 | 0.09 | 1.032346 | 1.0657376 | 20.46749 | 0.071372 | 11.27 |
| 2233   | 2015 | -0.25 | 0.09 | 1.032346 | 1.0657376 | 22.52083 | 0.086852 | 20.3  |
| 2233   | 2015 | -0.25 | 0.09 | 1.032346 | 1.0657376 | 22.52083 | 0.086852 | 20.3  |
| 2288   | 2015 | -0.27 | 0.09 | 1.032346 | 1.0657376 | 21.60387 | -0.10383 | 18.32 |
| 2288   | 2015 | -0.15 | 0.09 | 1.032346 | 1.0657376 | 21.60387 | -0.10383 | 18.32 |
| 2233   | 2015 | -0.25 | 0.09 | 1.032346 | 1.0657376 | 22.52083 | 0.086852 | 20.3  |
| 2233   | 2015 | -0.25 | 0.09 | 1.032346 | 1.0657376 | 22.52083 | 0.086852 | 20.3  |
| 2288   | 2015 | -0.81 | 0.09 | 1.032346 | 1.0657376 | 21.60387 | -0.10383 | 18.32 |
| 2288   | 2015 | -0.15 | 0.09 | 1.032346 | 1.0657376 | 21.60387 | -0.10383 | 18.32 |
| 2198   | 2015 | -0.11 | 0.09 | 1.032346 | 1.0657376 | 20.77015 | 0.071372 | 11.27 |
| 2198   | 2015 | -0.11 | 0.09 | 1.032346 | 1.0657376 | 20.77015 | 0.071372 | 11.27 |
| 2198   | 2015 | -0.11 | 0.09 | 1.032346 | 1.0657376 | 20.77015 | 0.071372 | 11.27 |
| 2288   | 2015 | -0.15 | 0.09 | 1.032346 | 1.0657376 | 21.60387 | -0.10383 | 18.32 |
| 2288   | 2015 | -0.81 | 0.09 | 1.032346 | 1.0657376 | 21.39015 | -0.10383 | 18.32 |
| 2288   | 2015 | -0.15 | 0.09 | 1.032346 | 1.0657376 | 21.60387 | -0.10383 | 18.32 |
| 2288   | 2015 | -0.15 | 0.09 | 1.032346 | 1.0657376 | 21.60387 | -0.10383 | 18.32 |
| 2233   | 2015 | -0.25 | 0.09 | 1.032346 | 1.0657376 | 22.19744 | 0.086852 | 20.3  |
| 2198   | 2015 | -0.11 | 0.09 | 1.032346 | 1.0657376 | 20.77015 | 0.071372 | 11.27 |
| 600252 | 2015 | 0.471 | 0.1  | 1.055594 | 1.1142782 | 22.53648 | 0.104962 | 22.52 |
| 662    | 2015 | -0.93 | 0.1  | 1.055594 | 1.1142782 | 20.20017 | -0.00512 | 17.96 |
| 662    | 2015 | -0.93 | 0.1  | 1.055594 | 1.1142782 | 20.33752 | -0.00512 | 17.96 |
| 662    | 2015 | -0.93 | 0.1  | 1.055594 | 1.1142782 | 20.33752 | -0.00512 | 17.96 |
| 600252 | 2015 | 0.547 | 0.1  | 1.055594 | 1.1142782 | 22.25088 | 0.104962 | 22.52 |
| 662    | 2015 | -0.93 | 0.1  | 1.055594 | 1.1142782 | 20.33752 | -0.00512 | 17.96 |
| 600252 | 2015 | 0.461 | 0.1  | 1.055594 | 1.1142782 | 22.53648 | 0.104962 | 22.52 |
| 662    | 2015 | -0.93 | 0.1  | 1.055594 | 1.1142782 | 20.33752 | -0.00512 | 17.96 |
| 600252 | 2015 | 0.471 | 0.1  | 1.055594 | 1.1142782 | 22.53648 | 0.104962 | 22.52 |
| 988    | 2015 | 0.011 | 0.12 | 0.926115 | 0.8576892 | 22.33376 | 0.050097 | 32.36 |
| 600068 | 2015 | -0.25 | 0.12 | 0.926115 | 0.8576892 | 24.86218 | 0.122106 | 42.34 |
| 600079 | 2015 | -0.71 | 0.12 | 0.926115 | 0.8576892 | 23.62204 | 0.092924 | 24.49 |
| 600133 | 2015 | -0.72 | 0.12 | 0.926115 | 0.8576892 | 23.52184 | 0.082977 | 21.45 |
| 300205 | 2015 | 0.792 | 0.12 | 0.926115 | 0.8576892 | 21.33749 | 0.005467 | 26.14 |
| 600068 | 2015 | -0.52 | 0.12 | 0.926115 | 0.8576892 | 25.5724  | 0.122106 | 42.34 |
| 300018 | 2015 | 1.37  | 0.12 | 0.926115 | 0.8576892 | 21.14376 | 0.053604 | 7.84  |
| 988    | 2015 | 0.011 | 0.12 | 0.926115 | 0.8576892 | 22.33376 | 0.050097 | 32.36 |
| 600879 | 2015 | -0.45 | 0.12 | 0.926115 | 0.8576892 | 23.09262 | 0.05035  | 20.87 |



|        |      |       |      |          |           |          |          |       |
|--------|------|-------|------|----------|-----------|----------|----------|-------|
| 600976 | 2015 | -0.78 | 0.12 | 0.926115 | 0.8576892 | 20.86821 | 0.08723  | 22.07 |
| 300220 | 2015 | -0.53 | 0.12 | 0.926115 | 0.8576892 | 20.10336 | -0.0455  | 49.87 |
| 300205 | 2015 | 0.792 | 0.12 | 0.926115 | 0.8576892 | 21.24409 | 0.005467 | 26.14 |
| 600885 | 2015 | -0.6  | 0.12 | 0.926115 | 0.8576892 | 22.40885 | 0.168913 | 34.32 |
| 600079 | 2015 | 0.096 | 0.12 | 0.926115 | 0.8576892 | 23.62204 | 0.092924 | 24.49 |
| 2377   | 2015 | -0.15 | 0.12 | 0.926115 | 0.8576892 | 21.32447 | 0.043807 | 42.94 |
| 988    | 2015 | 0.438 | 0.12 | 0.926115 | 0.8576892 | 22.33376 | 0.050097 | 32.36 |
| 300220 | 2015 | -0.09 | 0.12 | 0.926115 | 0.8576892 | 20.10336 | -0.0455  | 49.87 |
| 852    | 2015 | -0.22 | 0.12 | 0.926115 | 0.8576892 | 22.72182 | 0.015905 | 58.74 |
| 2194   | 2015 | -0.29 | 0.12 | 0.926115 | 0.8576892 | 21.63809 | 0.036737 | 29.8  |
| 600345 | 2015 | 0.75  | 0.12 | 0.926115 | 0.8576892 | 21.23988 | 0.046191 | 28.63 |
| 600079 | 2015 | 0.619 | 0.12 | 0.926115 | 0.8576892 | 23.62204 | 0.092924 | 24.49 |
| 300161 | 2015 | 1.84  | 0.12 | 0.926115 | 0.8576892 | 21.13131 | -0.04826 | 20.36 |
| 600993 | 2015 | -0.03 | 0.12 | 0.926115 | 0.8576892 | 21.60284 | 0.111814 | 29.27 |
| 852    | 2015 | -0.18 | 0.12 | 0.926115 | 0.8576892 | 22.72182 | 0.015905 | 58.74 |
| 600885 | 2015 | -0.07 | 0.12 | 0.926115 | 0.8576892 | 22.40885 | 0.168913 | 34.32 |
| 852    | 2015 | 0.306 | 0.12 | 0.926115 | 0.8576892 | 22.72182 | 0.015905 | 58.74 |
| 300184 | 2015 | 0.662 | 0.12 | 0.926115 | 0.8576892 | 20.49356 | 0.06076  | 23.28 |
| 300161 | 2015 | 1.162 | 0.12 | 0.926115 | 0.8576892 | 21.13131 | -0.04826 | 20.36 |
| 600079 | 2015 | 0.619 | 0.12 | 0.926115 | 0.8576892 | 23.62204 | 0.092924 | 24.49 |
| 300205 | 2015 | 0.792 | 0.12 | 0.926115 | 0.8576892 | 21.24409 | 0.005467 | 26.14 |
| 600345 | 2015 | 1.002 | 0.12 | 0.926115 | 0.8576892 | 21.23988 | 0.046191 | 28.63 |
| 852    | 2015 | 0.114 | 0.12 | 0.926115 | 0.8576892 | 22.72182 | 0.015905 | 58.74 |
| 300161 | 2015 | 0.98  | 0.12 | 0.926115 | 0.8576892 | 21.13131 | -0.04826 | 20.36 |
| 300323 | 2015 | 0.422 | 0.12 | 0.926115 | 0.8576892 | 22.16194 | -0.05749 | 16.8  |
| 600879 | 2015 | -0.13 | 0.12 | 0.926115 | 0.8576892 | 23.09262 | 0.05035  | 20.87 |
| 600079 | 2015 | -0.07 | 0.12 | 0.926115 | 0.8576892 | 23.62204 | 0.092924 | 24.49 |
| 988    | 2015 | 0.011 | 0.12 | 0.926115 | 0.8576892 | 22.33376 | 0.050097 | 32.36 |
| 988    | 2015 | -0.23 | 0.12 | 0.926115 | 0.8576892 | 22.33376 | 0.050097 | 32.36 |
| 600879 | 2015 | -0.63 | 0.12 | 0.926115 | 0.8576892 | 23.09262 | 0.05035  | 20.87 |
| 600079 | 2015 | -0.14 | 0.12 | 0.926115 | 0.8576892 | 23.62204 | 0.092924 | 24.49 |
| 600068 | 2015 | -0.72 | 0.12 | 0.926115 | 0.8576892 | 25.5724  | 0.122106 | 42.34 |
| 300018 | 2015 | 1.439 | 0.12 | 0.926115 | 0.8576892 | 21.14376 | 0.053604 | 7.84  |
| 852    | 2015 | 0.306 | 0.12 | 0.926115 | 0.8576892 | 22.72182 | 0.015905 | 58.74 |
| 600993 | 2015 | -0.81 | 0.12 | 0.926115 | 0.8576892 | 21.60284 | 0.111814 | 29.27 |
| 600885 | 2015 | -0.47 | 0.12 | 0.926115 | 0.8576892 | 22.40885 | 0.168913 | 34.32 |
| 300161 | 2015 | 1.443 | 0.12 | 0.926115 | 0.8576892 | 21.13131 | -0.04826 | 20.36 |
| 600998 | 2015 | -0.3  | 0.12 | 0.926115 | 0.8576892 | 24.20712 | 0.07149  | 26.3  |
| 2377   | 2015 | -0.15 | 0.12 | 0.926115 | 0.8576892 | 21.32447 | 0.043807 | 42.94 |
| 988    | 2015 | 0.011 | 0.12 | 0.926115 | 0.8576892 | 22.33376 | 0.050097 | 32.36 |
| 600498 | 2015 | 1.184 | 0.12 | 0.926115 | 0.8576892 | 23.5355  | 0.091229 | 46.55 |
| 300184 | 2015 | -0.41 | 0.12 | 0.926115 | 0.8576892 | 20.49356 | 0.06076  | 23.28 |
| 600976 | 2015 | 0.127 | 0.12 | 0.926115 | 0.8576892 | 20.86821 | 0.08723  | 22.07 |
| 600068 | 2015 | -0.25 | 0.12 | 0.926115 | 0.8576892 | 25.5724  | 0.122106 | 42.34 |
| 300054 | 2015 | 0.672 | 0.12 | 0.926115 | 0.8576892 | 21.29914 | 0.126065 | 18.19 |
| 2281   | 2015 | 0.344 | 0.12 | 0.926115 | 0.8576892 | 22.16202 | 0.091658 | 45.38 |
| 600998 | 2015 | -0.37 | 0.12 | 0.926115 | 0.8576892 | 24.20712 | 0.07149  | 26.3  |
| 2194   | 2015 | -0.29 | 0.12 | 0.926115 | 0.8576892 | 21.63086 | 0.036737 | 29.8  |
| 600079 | 2015 | 0.161 | 0.12 | 0.926115 | 0.8576892 | 23.62204 | 0.092924 | 24.49 |
| 988    | 2015 | -0.35 | 0.12 | 0.926115 | 0.8576892 | 22.33376 | 0.050097 | 32.36 |
| 600079 | 2015 | 0.22  | 0.12 | 0.926115 | 0.8576892 | 23.62204 | 0.092924 | 24.49 |
| 988    | 2015 | 0.011 | 0.12 | 0.926115 | 0.8576892 | 22.33376 | 0.050097 | 32.36 |
| 600993 | 2015 | -0.03 | 0.12 | 0.926115 | 0.8576892 | 21.60284 | 0.111814 | 29.27 |
| 2414   | 2015 | 0.929 | 0.12 | 0.926115 | 0.8576892 | 21.87896 | 0.025485 | 39.87 |

|        |      |       |      |          |           |          |          |       |
|--------|------|-------|------|----------|-----------|----------|----------|-------|
| 600068 | 2015 | -0.52 | 0.12 | 0.926115 | 0.8576892 | 25.5724  | 0.122106 | 42.34 |
| 600345 | 2015 | 1.002 | 0.12 | 0.926115 | 0.8576892 | 21.23988 | 0.046191 | 28.63 |
| 939    | 2015 | -0.15 | 0.12 | 0.926115 | 0.8576892 | 24.2165  | 0.042942 | 36.48 |
| 600068 | 2015 | -0.33 | 0.12 | 0.926115 | 0.8576892 | 25.5724  | 0.122106 | 42.34 |
| 600079 | 2015 | 0.619 | 0.12 | 0.926115 | 0.8576892 | 23.62204 | 0.092924 | 24.49 |
| 300018 | 2015 | 1.782 | 0.12 | 0.926115 | 0.8576892 | 21.14376 | 0.053604 | 7.84  |
| 988    | 2015 | 0.011 | 0.12 | 0.926115 | 0.8576892 | 22.33376 | 0.050097 | 32.36 |
| 600068 | 2015 | -0.84 | 0.12 | 0.926115 | 0.8576892 | 25.5724  | 0.122106 | 42.34 |
| 600885 | 2015 | -0.6  | 0.12 | 0.926115 | 0.8576892 | 22.40885 | 0.168913 | 34.32 |
| 600345 | 2015 | 1.002 | 0.12 | 0.926115 | 0.8576892 | 21.23988 | 0.046191 | 28.63 |
| 600068 | 2015 | -0.69 | 0.12 | 0.926115 | 0.8576892 | 25.5724  | 0.122106 | 42.34 |
| 600976 | 2015 | -0.22 | 0.12 | 0.926115 | 0.8576892 | 20.86821 | 0.08723  | 22.07 |
| 600133 | 2015 | -0.79 | 0.12 | 0.926115 | 0.8576892 | 23.52184 | 0.082977 | 21.45 |
| 300018 | 2015 | 1.197 | 0.12 | 0.926115 | 0.8576892 | 21.14376 | 0.053604 | 7.84  |
| 2281   | 2015 | 0.474 | 0.12 | 0.926115 | 0.8576892 | 22.16202 | 0.091658 | 45.38 |
| 600079 | 2015 | -0.04 | 0.12 | 0.926115 | 0.8576892 | 23.62204 | 0.092924 | 24.49 |
| 600355 | 2015 | 0.405 | 0.12 | 0.926115 | 0.8576892 | 20.19144 | -0.22609 | 15.08 |
| 988    | 2015 | -0.03 | 0.12 | 0.926115 | 0.8576892 | 22.33376 | 0.050097 | 32.36 |
| 600885 | 2015 | -0.6  | 0.12 | 0.926115 | 0.8576892 | 22.40885 | 0.168913 | 34.32 |
| 600345 | 2015 | 1.002 | 0.12 | 0.926115 | 0.8576892 | 21.04194 | 0.046191 | 28.63 |
| 852    | 2015 | -0.24 | 0.12 | 0.926115 | 0.8576892 | 22.72182 | 0.015905 | 58.74 |
| 2377   | 2015 | -0.15 | 0.12 | 0.926115 | 0.8576892 | 21.32447 | 0.043807 | 42.94 |
| 600079 | 2015 | 0.107 | 0.12 | 0.926115 | 0.8576892 | 23.62204 | 0.092924 | 24.49 |
| 600079 | 2015 | -0.05 | 0.12 | 0.926115 | 0.8576892 | 23.62204 | 0.092924 | 24.49 |
| 2377   | 2015 | -0.15 | 0.12 | 0.926115 | 0.8576892 | 21.05285 | 0.043807 | 42.94 |
| 600079 | 2015 | -0.31 | 0.12 | 0.926115 | 0.8576892 | 23.62204 | 0.092924 | 24.49 |
| 600885 | 2015 | -0.28 | 0.12 | 0.926115 | 0.8576892 | 22.40885 | 0.168913 | 34.32 |
| 600998 | 2015 | -0.25 | 0.12 | 0.926115 | 0.8576892 | 24.20712 | 0.07149  | 26.3  |
| 600993 | 2015 | -0.03 | 0.12 | 0.926115 | 0.8576892 | 21.60284 | 0.111814 | 29.27 |
| 300161 | 2015 | 1.435 | 0.12 | 0.926115 | 0.8576892 | 21.13131 | -0.04826 | 20.36 |
| 300161 | 2015 | 1.162 | 0.12 | 0.926115 | 0.8576892 | 20.9262  | -0.04826 | 20.36 |
| 300205 | 2015 | 0.792 | 0.12 | 0.926115 | 0.8576892 | 21.24409 | 0.005467 | 26.14 |
| 600993 | 2015 | -0.03 | 0.12 | 0.926115 | 0.8576892 | 21.60284 | 0.111814 | 29.27 |
| 300184 | 2015 | -0.05 | 0.12 | 0.926115 | 0.8576892 | 20.49356 | 0.06076  | 23.28 |
| 600976 | 2015 | 0.058 | 0.12 | 0.926115 | 0.8576892 | 20.86821 | 0.08723  | 22.07 |
| 600498 | 2015 | 0.841 | 0.12 | 0.926115 | 0.8576892 | 23.5355  | 0.091229 | 46.55 |
| 300184 | 2015 | 0.294 | 0.12 | 0.926115 | 0.8576892 | 20.49356 | 0.06076  | 23.28 |
| 600345 | 2015 | 1.002 | 0.12 | 0.926115 | 0.8576892 | 21.23988 | 0.046191 | 28.63 |
| 600068 | 2015 | -0.84 | 0.12 | 0.926115 | 0.8576892 | 25.5724  | 0.122106 | 42.34 |
| 300054 | 2015 | 0.672 | 0.12 | 0.926115 | 0.8576892 | 21.29914 | 0.126065 | 18.19 |
| 600079 | 2015 | -0.6  | 0.12 | 0.926115 | 0.8576892 | 23.04321 | 0.092924 | 24.49 |
| 600079 | 2015 | -0.33 | 0.12 | 0.926115 | 0.8576892 | 23.62204 | 0.092924 | 24.49 |
| 600133 | 2015 | -0.33 | 0.12 | 0.926115 | 0.8576892 | 23.52184 | 0.082977 | 21.45 |
| 600998 | 2015 | -0.37 | 0.12 | 0.926115 | 0.8576892 | 24.20712 | 0.07149  | 26.3  |
| 600355 | 2015 | 0.392 | 0.12 | 0.926115 | 0.8576892 | 20.19144 | -0.22609 | 15.08 |
| 300054 | 2015 | 0.764 | 0.12 | 0.926115 | 0.8576892 | 20.91009 | 0.126065 | 18.19 |
| 2194   | 2015 | -0.21 | 0.12 | 0.926115 | 0.8576892 | 21.63809 | 0.036737 | 29.8  |
| 600998 | 2015 | -0.27 | 0.12 | 0.926115 | 0.8576892 | 24.20712 | 0.07149  | 26.3  |
| 600068 | 2015 | -0.82 | 0.12 | 0.926115 | 0.8576892 | 25.5724  | 0.122106 | 42.34 |
| 939    | 2015 | 0.025 | 0.12 | 0.926115 | 0.8576892 | 23.8054  | 0.042942 | 36.48 |
| 600885 | 2015 | -0.6  | 0.12 | 0.926115 | 0.8576892 | 22.40885 | 0.168913 | 34.32 |
| 600885 | 2015 | -0.6  | 0.12 | 0.926115 | 0.8576892 | 22.40885 | 0.168913 | 34.32 |
| 300018 | 2015 | 1.233 | 0.12 | 0.926115 | 0.8576892 | 21.14376 | 0.053604 | 7.84  |
| 600993 | 2015 | -0.81 | 0.12 | 0.926115 | 0.8576892 | 21.43963 | 0.111814 | 29.27 |

|        |      |       |      |          |           |          |          |       |
|--------|------|-------|------|----------|-----------|----------|----------|-------|
| 600068 | 2015 | -0.25 | 0.12 | 0.926115 | 0.8576892 | 25.5724  | 0.122106 | 42.34 |
| 300184 | 2015 | 0.294 | 0.12 | 0.926115 | 0.8576892 | 20.49356 | 0.06076  | 23.28 |
| 2194   | 2015 | 0.838 | 0.12 | 0.926115 | 0.8576892 | 21.63809 | 0.036737 | 29.8  |
| 939    | 2015 | 0.025 | 0.12 | 0.926115 | 0.8576892 | 24.2165  | 0.042942 | 36.48 |
| 939    | 2015 | -0.39 | 0.12 | 0.926115 | 0.8576892 | 24.2165  | 0.042942 | 36.48 |
| 600498 | 2015 | 0.992 | 0.12 | 0.926115 | 0.8576892 | 23.5355  | 0.091229 | 46.55 |
| 600079 | 2015 | -0.71 | 0.12 | 0.926115 | 0.8576892 | 23.62204 | 0.092924 | 24.49 |
| 939    | 2015 | -0.15 | 0.12 | 0.926115 | 0.8576892 | 24.2165  | 0.042942 | 36.48 |
| 300323 | 2015 | 0.714 | 0.12 | 0.926115 | 0.8576892 | 22.16194 | -0.05749 | 16.8  |
| 600498 | 2015 | 0.992 | 0.12 | 0.926115 | 0.8576892 | 23.5355  | 0.091229 | 46.55 |
| 600079 | 2015 | -0.18 | 0.12 | 0.926115 | 0.8576892 | 23.62204 | 0.092924 | 24.49 |
| 600079 | 2015 | -0.71 | 0.12 | 0.926115 | 0.8576892 | 23.62204 | 0.092924 | 24.49 |
| 600345 | 2015 | 0.847 | 0.12 | 0.926115 | 0.8576892 | 21.23988 | 0.046191 | 28.63 |
| 988    | 2015 | 0.31  | 0.12 | 0.926115 | 0.8576892 | 22.33376 | 0.050097 | 32.36 |
| 300018 | 2015 | 1.11  | 0.12 | 0.926115 | 0.8576892 | 21.14376 | 0.053604 | 7.84  |
| 600345 | 2015 | 0.462 | 0.12 | 0.926115 | 0.8576892 | 21.23988 | 0.046191 | 28.63 |
| 300184 | 2015 | 0.294 | 0.12 | 0.926115 | 0.8576892 | 20.49356 | 0.06076  | 23.28 |
| 300220 | 2015 | -0.11 | 0.12 | 0.926115 | 0.8576892 | 20.10336 | -0.0455  | 49.87 |
| 600355 | 2015 | 0.392 | 0.12 | 0.926115 | 0.8576892 | 20.19144 | -0.22609 | 15.08 |
| 600079 | 2015 | 0.238 | 0.12 | 0.926115 | 0.8576892 | 23.62204 | 0.092924 | 24.49 |
| 600885 | 2015 | -0.6  | 0.12 | 0.926115 | 0.8576892 | 22.40885 | 0.168913 | 34.32 |
| 939    | 2015 | -0.39 | 0.12 | 0.926115 | 0.8576892 | 24.2165  | 0.042942 | 36.48 |
| 600133 | 2015 | -0.65 | 0.12 | 0.926115 | 0.8576892 | 23.52184 | 0.082977 | 21.45 |
| 300054 | 2015 | 0.215 | 0.12 | 0.926115 | 0.8576892 | 21.29914 | 0.126065 | 18.19 |
| 600068 | 2015 | -0.55 | 0.12 | 0.926115 | 0.8576892 | 25.5724  | 0.122106 | 42.34 |
| 600998 | 2015 | -0.37 | 0.12 | 0.926115 | 0.8576892 | 24.20712 | 0.07149  | 26.3  |
| 600133 | 2015 | -0.33 | 0.12 | 0.926115 | 0.8576892 | 23.52184 | 0.082977 | 21.45 |
| 2281   | 2015 | 0.474 | 0.12 | 0.926115 | 0.8576892 | 21.91963 | 0.091658 | 45.38 |
| 300323 | 2015 | 0.699 | 0.12 | 0.926115 | 0.8576892 | 21.62035 | -0.05749 | 16.8  |
| 600068 | 2015 | -0.72 | 0.12 | 0.926115 | 0.8576892 | 25.5724  | 0.122106 | 42.34 |
| 2281   | 2015 | 0.474 | 0.12 | 0.926115 | 0.8576892 | 22.16202 | 0.091658 | 45.38 |
| 300161 | 2015 | 1.162 | 0.12 | 0.926115 | 0.8576892 | 21.13131 | -0.04826 | 20.36 |
| 600345 | 2015 | 0.505 | 0.12 | 0.926115 | 0.8576892 | 21.23988 | 0.046191 | 28.63 |
| 600068 | 2015 | -0.74 | 0.12 | 0.926115 | 0.8576892 | 25.5724  | 0.122106 | 42.34 |
| 600133 | 2015 | -0.49 | 0.12 | 0.926115 | 0.8576892 | 22.30318 | 0.082977 | 21.45 |
| 600993 | 2015 | -0.03 | 0.12 | 0.926115 | 0.8576892 | 21.60284 | 0.111814 | 29.27 |
| 600345 | 2015 | 0.119 | 0.12 | 0.926115 | 0.8576892 | 21.23988 | 0.046191 | 28.63 |
| 300018 | 2015 | 1.37  | 0.12 | 0.926115 | 0.8576892 | 21.14376 | 0.053604 | 7.84  |
| 600079 | 2015 | -0.6  | 0.12 | 0.926115 | 0.8576892 | 23.62204 | 0.092924 | 24.49 |
| 988    | 2015 | 0.531 | 0.12 | 0.926115 | 0.8576892 | 22.33376 | 0.050097 | 32.36 |
| 600079 | 2015 | -0.07 | 0.12 | 0.926115 | 0.8576892 | 23.62204 | 0.092924 | 24.49 |
| 300161 | 2015 | 1.162 | 0.12 | 0.926115 | 0.8576892 | 21.13131 | -0.04826 | 20.36 |
| 600498 | 2015 | 0.202 | 0.12 | 0.926115 | 0.8576892 | 23.5355  | 0.091229 | 46.55 |
| 2414   | 2015 | 1.337 | 0.12 | 0.926115 | 0.8576892 | 21.92855 | 0.025485 | 39.87 |
| 600498 | 2015 | 0.202 | 0.12 | 0.926115 | 0.8576892 | 23.67183 | 0.091229 | 46.55 |
| 600498 | 2015 | 0.841 | 0.12 | 0.926115 | 0.8576892 | 23.5355  | 0.091229 | 46.55 |
| 600879 | 2015 | -0.24 | 0.12 | 0.926115 | 0.8576892 | 23.09262 | 0.05035  | 20.87 |
| 600998 | 2015 | -0.3  | 0.12 | 0.926115 | 0.8576892 | 24.20712 | 0.07149  | 26.3  |
| 2414   | 2015 | 1.04  | 0.12 | 0.926115 | 0.8576892 | 21.87896 | 0.025485 | 39.87 |
| 600498 | 2015 | 0.841 | 0.12 | 0.926115 | 0.8576892 | 23.5355  | 0.091229 | 46.55 |
| 600879 | 2015 | 0.113 | 0.12 | 0.926115 | 0.8576892 | 23.09262 | 0.05035  | 20.87 |
| 600885 | 2015 | -0.6  | 0.12 | 0.926115 | 0.8576892 | 22.40885 | 0.168913 | 34.32 |
| 600345 | 2015 | 1.002 | 0.12 | 0.926115 | 0.8576892 | 21.23988 | 0.046191 | 28.63 |
| 2377   | 2015 | -0.15 | 0.12 | 0.926115 | 0.8576892 | 21.32447 | 0.043807 | 42.94 |

|        |      |       |      |          |           |          |          |       |
|--------|------|-------|------|----------|-----------|----------|----------|-------|
| 2414   | 2015 | 0.929 | 0.12 | 0.926115 | 0.8576892 | 21.87896 | 0.025485 | 39.87 |
| 600355 | 2015 | 0.013 | 0.12 | 0.926115 | 0.8576892 | 20.19144 | -0.22609 | 15.08 |
| 300205 | 2015 | 0.792 | 0.12 | 0.926115 | 0.8576892 | 21.24409 | 0.005467 | 26.14 |
| 600976 | 2015 | -0.78 | 0.12 | 0.926115 | 0.8576892 | 21.19457 | 0.08723  | 22.07 |
| 600498 | 2015 | 1.465 | 0.12 | 0.926115 | 0.8576892 | 23.5355  | 0.091229 | 46.55 |
| 600879 | 2015 | -0.1  | 0.12 | 0.926115 | 0.8576892 | 23.09262 | 0.05035  | 20.87 |
| 600079 | 2015 | -0.6  | 0.12 | 0.926115 | 0.8576892 | 23.62204 | 0.092924 | 24.49 |
| 600079 | 2015 | -0.6  | 0.12 | 0.926115 | 0.8576892 | 23.62204 | 0.092924 | 24.49 |
| 600998 | 2015 | 0.302 | 0.12 | 0.926115 | 0.8576892 | 24.20712 | 0.07149  | 26.3  |
| 852    | 2015 | -0.15 | 0.12 | 0.926115 | 0.8576892 | 22.72182 | 0.015905 | 58.74 |
| 600998 | 2015 | -0.41 | 0.12 | 0.926115 | 0.8576892 | 24.20712 | 0.07149  | 26.3  |
| 600998 | 2015 | -0.37 | 0.12 | 0.926115 | 0.8576892 | 24.20712 | 0.07149  | 26.3  |
| 300220 | 2015 | 0.13  | 0.12 | 0.926115 | 0.8576892 | 20.10336 | -0.0455  | 49.87 |
| 600355 | 2015 | 0.353 | 0.12 | 0.926115 | 0.8576892 | 20.19144 | -0.22609 | 15.08 |
| 600498 | 2015 | 1.527 | 0.12 | 0.926115 | 0.8576892 | 23.5355  | 0.091229 | 46.55 |
| 600879 | 2015 | -0.18 | 0.12 | 0.926115 | 0.8576892 | 23.09262 | 0.05035  | 20.87 |
| 600998 | 2015 | 0.302 | 0.12 | 0.926115 | 0.8576892 | 24.20712 | 0.07149  | 26.3  |
| 600993 | 2015 | -0.03 | 0.12 | 0.926115 | 0.8576892 | 21.60284 | 0.111814 | 29.27 |
| 600345 | 2015 | 0.457 | 0.12 | 0.926115 | 0.8576892 | 21.23988 | 0.046191 | 28.63 |
| 600998 | 2015 | -0.91 | 0.12 | 0.926115 | 0.8576892 | 24.20712 | 0.07149  | 26.3  |
| 600498 | 2015 | 0.932 | 0.12 | 0.926115 | 0.8576892 | 23.5355  | 0.091229 | 46.55 |
| 600079 | 2015 | 0.22  | 0.12 | 0.926115 | 0.8576892 | 23.62204 | 0.092924 | 24.49 |
| 600879 | 2015 | -0.45 | 0.12 | 0.926115 | 0.8576892 | 23.09262 | 0.05035  | 20.87 |
| 600498 | 2015 | 1.037 | 0.12 | 0.926115 | 0.8576892 | 23.5355  | 0.091229 | 46.55 |
| 300161 | 2015 | 0.773 | 0.12 | 0.926115 | 0.8576892 | 21.13131 | -0.04826 | 20.36 |
| 988    | 2015 | -0.35 | 0.12 | 0.926115 | 0.8576892 | 22.33376 | 0.050097 | 32.36 |
| 2414   | 2015 | 1.04  | 0.12 | 0.926115 | 0.8576892 | 21.87896 | 0.025485 | 39.87 |
| 600498 | 2015 | 1.298 | 0.12 | 0.926115 | 0.8576892 | 23.5355  | 0.091229 | 46.55 |
| 2194   | 2015 | 0.061 | 0.12 | 0.926115 | 0.8576892 | 21.63809 | 0.036737 | 29.8  |
| 600879 | 2015 | -0.45 | 0.12 | 0.926115 | 0.8576892 | 23.09262 | 0.05035  | 20.87 |
| 988    | 2015 | 0.011 | 0.12 | 0.926115 | 0.8576892 | 21.78249 | 0.050097 | 32.36 |
| 988    | 2015 | -0.03 | 0.12 | 0.926115 | 0.8576892 | 22.33376 | 0.050097 | 32.36 |
| 600498 | 2015 | 1.052 | 0.12 | 0.926115 | 0.8576892 | 23.5355  | 0.091229 | 46.55 |
| 600976 | 2015 | 0.029 | 0.12 | 0.926115 | 0.8576892 | 20.86821 | 0.08723  | 22.07 |
| 600885 | 2015 | -0.35 | 0.12 | 0.926115 | 0.8576892 | 22.40885 | 0.168913 | 34.32 |
| 300161 | 2015 | 1.162 | 0.12 | 0.926115 | 0.8576892 | 21.13131 | -0.04826 | 20.36 |
| 600345 | 2015 | 1.002 | 0.12 | 0.926115 | 0.8576892 | 21.23988 | 0.046191 | 28.63 |
| 852    | 2015 | -0.32 | 0.12 | 0.926115 | 0.8576892 | 22.72182 | 0.015905 | 58.74 |
| 2414   | 2015 | 1.337 | 0.12 | 0.926115 | 0.8576892 | 21.87896 | 0.025485 | 39.87 |
| 600885 | 2015 | -0.21 | 0.12 | 0.926115 | 0.8576892 | 21.97689 | 0.168913 | 34.32 |
| 988    | 2015 | -0.25 | 0.12 | 0.926115 | 0.8576892 | 22.33376 | 0.050097 | 32.36 |
| 600068 | 2015 | -0.42 | 0.12 | 0.926115 | 0.8576892 | 25.5724  | 0.122106 | 42.34 |
| 600879 | 2015 | -0.02 | 0.12 | 0.926115 | 0.8576892 | 23.09262 | 0.05035  | 20.87 |
| 300184 | 2015 | 0.294 | 0.12 | 0.926115 | 0.8576892 | 20.72807 | 0.06076  | 23.28 |
| 600879 | 2015 | -0.04 | 0.12 | 0.926115 | 0.8576892 | 23.09262 | 0.05035  | 20.87 |
| 600079 | 2015 | -0.13 | 0.12 | 0.926115 | 0.8576892 | 23.62204 | 0.092924 | 24.49 |
| 300018 | 2015 | 0.948 | 0.12 | 0.926115 | 0.8576892 | 21.06037 | 0.053604 | 7.84  |
| 600498 | 2015 | 0.202 | 0.12 | 0.926115 | 0.8576892 | 23.5355  | 0.091229 | 46.55 |
| 939    | 2015 | -0.39 | 0.12 | 0.926115 | 0.8576892 | 24.2165  | 0.042942 | 36.48 |
| 852    | 2015 | -0.52 | 0.12 | 0.926115 | 0.8576892 | 21.92338 | 0.015905 | 58.74 |
| 600355 | 2015 | 0.013 | 0.12 | 0.926115 | 0.8576892 | 20.19144 | -0.22609 | 15.08 |
| 600133 | 2015 | -0.71 | 0.12 | 0.926115 | 0.8576892 | 23.52184 | 0.082977 | 21.45 |
| 600068 | 2015 | -0.25 | 0.12 | 0.926115 | 0.8576892 | 25.5724  | 0.122106 | 42.34 |
| 988    | 2015 | 0.211 | 0.12 | 0.926115 | 0.8576892 | 22.33376 | 0.050097 | 32.36 |

|        |      |       |      |          |            |          |          |       |
|--------|------|-------|------|----------|------------|----------|----------|-------|
| 600079 | 2015 | -0.6  | 0.12 | 0.926115 | 0.8576892  | 23.62204 | 0.092924 | 24.49 |
| 600068 | 2015 | -0.52 | 0.12 | 0.926115 | 0.8576892  | 25.5724  | 0.122106 | 42.34 |
| 600133 | 2015 | -0.33 | 0.12 | 0.926115 | 0.8576892  | 23.52184 | 0.082977 | 21.45 |
| 300161 | 2015 | 1.286 | 0.12 | 0.926115 | 0.8576892  | 21.13131 | -0.04826 | 20.36 |
| 600879 | 2015 | -0.1  | 0.12 | 0.926115 | 0.8576892  | 23.09262 | 0.05035  | 20.87 |
| 600068 | 2015 | -0.62 | 0.12 | 0.926115 | 0.8576892  | 25.5724  | 0.122106 | 42.34 |
| 300054 | 2015 | 0.672 | 0.12 | 0.926115 | 0.8576892  | 21.29914 | 0.126065 | 18.19 |
| 600885 | 2015 | -0.31 | 0.12 | 0.926115 | 0.8576892  | 22.40885 | 0.168913 | 34.32 |
| 988    | 2015 | 0.011 | 0.12 | 0.926115 | 0.8576892  | 22.33376 | 0.050097 | 32.36 |
| 2194   | 2015 | 0.061 | 0.12 | 0.926115 | 0.8576892  | 21.63809 | 0.036737 | 29.8  |
| 600879 | 2015 | -0.18 | 0.12 | 0.926115 | 0.8576892  | 23.09262 | 0.05035  | 20.87 |
| 988    | 2015 | 0.801 | 0.12 | 0.926115 | 0.8576892  | 22.33376 | 0.050097 | 32.36 |
| 988    | 2015 | 0.016 | 0.12 | 0.926115 | 0.8576892  | 22.33376 | 0.050097 | 32.36 |
| 600355 | 2015 | 0.405 | 0.12 | 0.926115 | 0.8576892  | 20.17953 | -0.22609 | 15.08 |
| 2194   | 2015 | 0.172 | 0.12 | 0.926115 | 0.8576892  | 21.63809 | 0.036737 | 29.8  |
| 300323 | 2015 | 0.714 | 0.12 | 0.926115 | 0.8576892  | 22.16194 | -0.05749 | 16.8  |
| 300220 | 2015 | -0.1  | 0.12 | 0.926115 | 0.8576892  | 20.10336 | -0.0455  | 49.87 |
| 600885 | 2015 | -0.19 | 0.12 | 0.926115 | 0.8576892  | 22.40885 | 0.168913 | 34.32 |
| 2414   | 2015 | 1.04  | 0.12 | 0.926115 | 0.8576892  | 21.87896 | 0.025485 | 39.87 |
| 939    | 2015 | -0.15 | 0.12 | 0.926115 | 0.8576892  | 24.2165  | 0.042942 | 36.48 |
| 300323 | 2015 | 0.422 | 0.12 | 0.926115 | 0.8576892  | 22.16194 | -0.05749 | 16.8  |
| 939    | 2015 | -0.39 | 0.12 | 0.926115 | 0.8576892  | 24.2165  | 0.042942 | 36.48 |
| 600068 | 2015 | -0.72 | 0.12 | 0.926115 | 0.8576892  | 25.5724  | 0.122106 | 42.34 |
| 600498 | 2015 | 0.251 | 0.12 | 0.926115 | 0.8576892  | 23.5355  | 0.091229 | 46.55 |
| 300161 | 2015 | 1.443 | 0.12 | 0.926115 | 0.8576892  | 21.13131 | -0.04826 | 20.36 |
| 600133 | 2015 | -0.33 | 0.12 | 0.926115 | 0.8576892  | 23.52184 | 0.082977 | 21.45 |
| 600993 | 2015 | -0.16 | 0.12 | 0.926115 | 0.8576892  | 21.60284 | 0.111814 | 29.27 |
| 600079 | 2015 | -0.71 | 0.12 | 0.926115 | 0.8576892  | 23.62204 | 0.092924 | 24.49 |
| 600885 | 2015 | -0.31 | 0.12 | 0.926115 | 0.8576892  | 22.40885 | 0.168913 | 34.32 |
| 2281   | 2015 | 0.42  | 0.12 | 0.926115 | 0.8576892  | 22.16202 | 0.091658 | 45.38 |
| 300205 | 2015 | 0.792 | 0.12 | 0.926115 | 0.8576892  | 21.24409 | 0.005467 | 26.14 |
| 600879 | 2015 | -0.45 | 0.12 | 0.926115 | 0.8576892  | 23.09262 | 0.05035  | 20.87 |
| 600998 | 2015 | -0.91 | 0.12 | 0.926115 | 0.8576892  | 23.73753 | 0.07149  | 26.3  |
| 300220 | 2015 | -0.11 | 0.12 | 0.926115 | 0.8576892  | 20.10336 | -0.0455  | 49.87 |
| 2281   | 2015 | 0.344 | 0.12 | 0.926115 | 0.8576892  | 22.16202 | 0.091658 | 45.38 |
| 600133 | 2015 | -0.97 | 0.12 | 0.926115 | 0.8576892  | 23.52184 | 0.082977 | 21.45 |
| 988    | 2015 | 0.63  | 0.12 | 0.926115 | 0.8576892  | 22.33376 | 0.050097 | 32.36 |
| 988    | 2015 | 0.011 | 0.12 | 0.926115 | 0.8576892  | 22.33376 | 0.050097 | 32.36 |
| 600885 | 2015 | -0.31 | 0.12 | 0.926115 | 0.8576892  | 22.40885 | 0.168913 | 34.32 |
| 600976 | 2015 | 0.029 | 0.12 | 0.926115 | 0.8576892  | 20.86821 | 0.08723  | 22.07 |
| 600976 | 2015 | -0.39 | 0.12 | 0.926115 | 0.8576892  | 20.86821 | 0.08723  | 22.07 |
| 600498 | 2015 | 1.493 | 0.12 | 0.926115 | 0.8576892  | 23.5355  | 0.091229 | 46.55 |
| 600879 | 2015 | -0.11 | 0.12 | 0.926115 | 0.8576892  | 23.09262 | 0.05035  | 20.87 |
| 300184 | 2015 | -0.05 | 0.12 | 0.926115 | 0.8576892  | 20.49356 | 0.06076  | 23.28 |
| 600355 | 2015 | 0.392 | 0.12 | 0.926115 | 0.8576892  | 20.19144 | -0.22609 | 15.08 |
| 600885 | 2015 | -0.6  | 0.12 | 0.926115 | 0.8576892  | 22.40885 | 0.168913 | 34.32 |
| 600885 | 2015 | -0.6  | 0.12 | 0.926115 | 0.8576892  | 22.40885 | 0.168913 | 34.32 |
| 600879 | 2015 | -0.53 | 0.12 | 0.926115 | 0.8576892  | 22.46773 | 0.05035  | 20.87 |
| 2096   | 2015 | -0.73 | 1.03 | 0.990063 | 0.98022473 | 22.03097 | 0.052596 | 41.62 |
| 2096   | 2015 | -0.73 | 1.03 | 0.990063 | 0.98022473 | 22.03097 | 0.052596 | 41.62 |
| 2096   | 2015 | -0.73 | 1.03 | 0.990063 | 0.98022473 | 22.03097 | 0.052596 | 41.62 |
| 2096   | 2015 | -0.4  | 1.03 | 0.990063 | 0.98022473 | 22.03097 | 0.052596 | 41.62 |
| 2096   | 2015 | -0.4  | 1.03 | 0.990063 | 0.98022473 | 22.03097 | 0.052596 | 41.62 |
| 2096   | 2015 | -0.64 | 1.03 | 0.990063 | 0.98022473 | 22.03097 | 0.052596 | 41.62 |

|        |      |       |      |          |            |          |          |       |
|--------|------|-------|------|----------|------------|----------|----------|-------|
| 2096   | 2015 | -0.73 | 1.03 | 0.990063 | 0.98022473 | 22.03097 | 0.052596 | 41.62 |
| 2096   | 2015 | -0.73 | 1.03 | 0.990063 | 0.98022473 | 22.03097 | 0.052596 | 41.62 |
| 2096   | 2015 | -0.73 | 1.03 | 0.990063 | 0.98022473 | 21.80123 | 0.052596 | 41.62 |
| 300114 | 2015 | 0.167 | 0.04 | 1.232816 | 1.5198358  | 21.31667 | 0.08501  | 51.77 |
| 300114 | 2015 | -0.21 | 0.04 | 1.232816 | 1.5198358  | 21.31667 | 0.08501  | 51.77 |
| 300114 | 2015 | -0.43 | 0.04 | 1.232816 | 1.5198358  | 21.31667 | 0.08501  | 51.77 |
| 300114 | 2015 | -0.06 | 0.04 | 1.232816 | 1.5198358  | 21.31667 | 0.08501  | 51.77 |
| 300114 | 2015 | -0.13 | 0.04 | 1.232816 | 1.5198358  | 21.31667 | 0.08501  | 51.77 |
| 300114 | 2015 | 0.052 | 0.04 | 1.232816 | 1.5198358  | 21.31667 | 0.08501  | 51.77 |
| 300114 | 2015 | -0.06 | 0.04 | 1.232816 | 1.5198358  | 20.94066 | 0.08501  | 51.77 |
| 300114 | 2015 | -0.16 | 0.04 | 1.232816 | 1.5198358  | 21.31667 | 0.08501  | 51.77 |
| 300114 | 2015 | 0.052 | 0.04 | 1.232816 | 1.5198358  | 21.31667 | 0.08501  | 51.77 |
| 823    | 2015 | -0.55 | 0.09 | 1.007521 | 1.0150985  | 22.25247 | 0.038524 | 30.31 |
| 600978 | 2015 | -0.56 | 0.09 | 1.007521 | 1.0150985  | 23.26681 | 0.089144 | 23.84 |
| 300043 | 2015 | -0.36 | 0.09 | 1.007521 | 1.0150985  | 21.92399 | 0.192164 | 32.77 |
| 300093 | 2015 | -0.36 | 0.09 | 1.007521 | 1.0150985  | 21.20876 | 0.005288 | 12.11 |
| 2345   | 2015 | -0.76 | 0.09 | 1.007521 | 1.0150985  | 21.97659 | 0.099504 | 30.01 |
| 2292   | 2015 | -0.23 | 0.09 | 1.007521 | 1.0150985  | 22.29382 | 0.155727 | 48.64 |
| 601515 | 2015 | -0.4  | 0.09 | 1.007521 | 1.0150985  | 22.23352 | 0.205631 | 54.4  |
| 823    | 2015 | -0.34 | 0.09 | 1.007521 | 1.0150985  | 22.25247 | 0.038524 | 30.31 |
| 300043 | 2015 | -0.1  | 0.09 | 1.007521 | 1.0150985  | 21.91752 | 0.192164 | 32.77 |
| 2584   | 2015 | 0.075 | 0.09 | 1.007521 | 1.0150985  | 21.59512 | 0.053791 | 17.08 |
| 601515 | 2015 | -0.05 | 0.09 | 1.007521 | 1.0150985  | 22.23352 | 0.205631 | 54.4  |
| 300281 | 2015 | -0.37 | 0.09 | 1.007521 | 1.0150985  | 20.76537 | 0.040462 | 44.42 |
| 823    | 2015 | 0.059 | 0.09 | 1.007521 | 1.0150985  | 22.25247 | 0.038524 | 30.31 |
| 2212   | 2015 | -0.49 | 0.09 | 1.007521 | 1.0150985  | 21.87245 | 0.031353 | 54.63 |
| 2584   | 2015 | 0.075 | 0.09 | 1.007521 | 1.0150985  | 21.59512 | 0.053791 | 17.08 |
| 2212   | 2015 | -0.14 | 0.09 | 1.007521 | 1.0150985  | 21.61656 | 0.031353 | 54.63 |
| 2345   | 2015 | -0.76 | 0.09 | 1.007521 | 1.0150985  | 22.19942 | 0.099504 | 30.01 |
| 2425   | 2015 | -0.59 | 0.09 | 1.007521 | 1.0150985  | 21.70514 | 0.023497 | 35.15 |
| 2292   | 2015 | -0.12 | 0.09 | 1.007521 | 1.0150985  | 22.29382 | 0.155727 | 48.64 |
| 2502   | 2015 | -0.23 | 0.09 | 1.007521 | 1.0150985  | 21.92687 | 0.039556 | 30.01 |
| 300043 | 2015 | -0.36 | 0.09 | 1.007521 | 1.0150985  | 21.91752 | 0.192164 | 32.77 |
| 300057 | 2015 | -0.28 | 0.09 | 1.007521 | 1.0150985  | 22.23527 | 0.023073 | 49.2  |
| 300043 | 2015 | -0.36 | 0.09 | 1.007521 | 1.0150985  | 21.91752 | 0.192164 | 32.77 |
| 601515 | 2015 | -0.56 | 0.09 | 1.007521 | 1.0150985  | 22.23352 | 0.205631 | 54.4  |
| 601515 | 2015 | -0.34 | 0.09 | 1.007521 | 1.0150985  | 22.23352 | 0.205631 | 54.4  |
| 2425   | 2015 | -0.59 | 0.09 | 1.007521 | 1.0150985  | 21.70514 | 0.023497 | 35.15 |
| 300281 | 2015 | -0.4  | 0.09 | 1.007521 | 1.0150985  | 20.76537 | 0.040462 | 44.42 |
| 300057 | 2015 | -0.34 | 0.09 | 1.007521 | 1.0150985  | 22.23527 | 0.023073 | 49.2  |
| 601515 | 2015 | -0.47 | 0.09 | 1.007521 | 1.0150985  | 22.23352 | 0.205631 | 54.4  |
| 601515 | 2015 | -0.34 | 0.09 | 1.007521 | 1.0150985  | 21.94977 | 0.205631 | 54.4  |
| 2584   | 2015 | 0.075 | 0.09 | 1.007521 | 1.0150985  | 21.44052 | 0.053791 | 17.08 |
| 300093 | 2015 | -0.36 | 0.09 | 1.007521 | 1.0150985  | 21.20876 | 0.005288 | 12.11 |
| 600978 | 2015 | -0.14 | 0.09 | 1.007521 | 1.0150985  | 23.2009  | 0.089144 | 23.84 |
| 823    | 2015 | -0.69 | 0.09 | 1.007521 | 1.0150985  | 22.25247 | 0.038524 | 30.31 |
| 600978 | 2015 | -0.32 | 0.09 | 1.007521 | 1.0150985  | 23.26681 | 0.089144 | 23.84 |
| 2502   | 2015 | -0.23 | 0.09 | 1.007521 | 1.0150985  | 21.83454 | 0.039556 | 30.01 |
| 823    | 2015 | 0.059 | 0.09 | 1.007521 | 1.0150985  | 22.25247 | 0.038524 | 30.31 |
| 300281 | 2015 | -0.4  | 0.09 | 1.007521 | 1.0150985  | 20.76537 | 0.040462 | 44.42 |
| 600978 | 2015 | -0.1  | 0.09 | 1.007521 | 1.0150985  | 23.26681 | 0.089144 | 23.84 |
| 300057 | 2015 | -0.18 | 0.09 | 1.007521 | 1.0150985  | 22.23527 | 0.023073 | 49.2  |
| 2212   | 2015 | -0.34 | 0.09 | 1.007521 | 1.0150985  | 21.87245 | 0.031353 | 54.63 |
| 601515 | 2015 | -0.56 | 0.09 | 1.007521 | 1.0150985  | 22.23352 | 0.205631 | 54.4  |

|        |      |       |      |          |           |          |          |       |
|--------|------|-------|------|----------|-----------|----------|----------|-------|
| 2584   | 2015 | 0.075 | 0.09 | 1.007521 | 1.0150985 | 21.59512 | 0.053791 | 17.08 |
| 300043 | 2015 | 0.352 | 0.09 | 1.007521 | 1.0150985 | 21.91752 | 0.192164 | 32.77 |
| 823    | 2015 | -0.69 | 0.09 | 1.007521 | 1.0150985 | 22.25247 | 0.038524 | 30.31 |
| 2292   | 2015 | -0.08 | 0.09 | 1.007521 | 1.0150985 | 22.29382 | 0.155727 | 48.64 |
| 2502   | 2015 | -0.23 | 0.09 | 1.007521 | 1.0150985 | 21.92687 | 0.039556 | 30.01 |
| 600978 | 2015 | -0.3  | 0.09 | 1.007521 | 1.0150985 | 23.26681 | 0.089144 | 23.84 |
| 300093 | 2015 | -0.36 | 0.09 | 1.007521 | 1.0150985 | 21.20876 | 0.005288 | 12.11 |
| 300281 | 2015 | -0.41 | 0.09 | 1.007521 | 1.0150985 | 20.76537 | 0.040462 | 44.42 |
| 2292   | 2015 | 0.105 | 0.09 | 1.007521 | 1.0150985 | 22.29382 | 0.155727 | 48.64 |
| 823    | 2015 | 0.059 | 0.09 | 1.007521 | 1.0150985 | 22.25247 | 0.038524 | 30.31 |
| 601515 | 2015 | -0.2  | 0.09 | 1.007521 | 1.0150985 | 22.23352 | 0.205631 | 54.4  |
| 300057 | 2015 | -0.11 | 0.09 | 1.007521 | 1.0150985 | 21.62465 | 0.023073 | 49.2  |
| 300057 | 2015 | -0.29 | 0.09 | 1.007521 | 1.0150985 | 22.23527 | 0.023073 | 49.2  |
| 823    | 2015 | -0.69 | 0.09 | 1.007521 | 1.0150985 | 22.25247 | 0.038524 | 30.31 |
| 300043 | 2015 | -0.36 | 0.09 | 1.007521 | 1.0150985 | 21.91752 | 0.192164 | 32.77 |
| 601515 | 2015 | -0.31 | 0.09 | 1.007521 | 1.0150985 | 22.23352 | 0.205631 | 54.4  |
| 2292   | 2015 | 0.057 | 0.09 | 1.007521 | 1.0150985 | 22.29382 | 0.155727 | 48.64 |
| 601515 | 2015 | -0.48 | 0.09 | 1.007521 | 1.0150985 | 22.23352 | 0.205631 | 54.4  |
| 2292   | 2015 | 0.057 | 0.09 | 1.007521 | 1.0150985 | 22.29382 | 0.155727 | 48.64 |
| 2292   | 2015 | -0.12 | 0.09 | 1.007521 | 1.0150985 | 22.29382 | 0.155727 | 48.64 |
| 2502   | 2015 | -0.33 | 0.09 | 1.007521 | 1.0150985 | 21.92687 | 0.039556 | 30.01 |
| 601515 | 2015 | -0.1  | 0.09 | 1.007521 | 1.0150985 | 22.23352 | 0.205631 | 54.4  |
| 2425   | 2015 | -0.59 | 0.09 | 1.007521 | 1.0150985 | 21.60991 | 0.023497 | 35.15 |
| 2584   | 2015 | 0.075 | 0.09 | 1.007521 | 1.0150985 | 21.59512 | 0.053791 | 17.08 |
| 2292   | 2015 | -0.1  | 0.09 | 1.007521 | 1.0150985 | 22.29382 | 0.155727 | 48.64 |
| 601515 | 2015 | -0.47 | 0.09 | 1.007521 | 1.0150985 | 22.23352 | 0.205631 | 54.4  |
| 823    | 2015 | -0.55 | 0.09 | 1.007521 | 1.0150985 | 22.25247 | 0.038524 | 30.31 |
| 2584   | 2015 | 0.075 | 0.09 | 1.007521 | 1.0150985 | 21.59512 | 0.053791 | 17.08 |
| 300057 | 2015 | -0.11 | 0.09 | 1.007521 | 1.0150985 | 22.23527 | 0.023073 | 49.2  |
| 2575   | 2015 | -0.62 | 0.09 | 1.007521 | 1.0150985 | 20.69809 | 0.020325 | 44.85 |
| 2212   | 2015 | -0.34 | 0.09 | 1.007521 | 1.0150985 | 21.87245 | 0.031353 | 54.63 |
| 2345   | 2015 | -0.76 | 0.09 | 1.007521 | 1.0150985 | 22.19942 | 0.099504 | 30.01 |
| 300093 | 2015 | -0.36 | 0.09 | 1.007521 | 1.0150985 | 21.11255 | 0.005288 | 12.11 |
| 600978 | 2015 | -0.15 | 0.09 | 1.007521 | 1.0150985 | 23.26681 | 0.089144 | 23.84 |
| 300093 | 2015 | -0.36 | 0.09 | 1.007521 | 1.0150985 | 21.20876 | 0.005288 | 12.11 |
| 2575   | 2015 | -0.62 | 0.09 | 1.007521 | 1.0150985 | 20.68434 | 0.020325 | 44.85 |
| 300281 | 2015 | 0.07  | 0.09 | 1.007521 | 1.0150985 | 20.60695 | 0.040462 | 44.42 |
| 600978 | 2015 | -0.1  | 0.09 | 1.007521 | 1.0150985 | 23.26681 | 0.089144 | 23.84 |
| 2584   | 2015 | 0.075 | 0.09 | 1.007521 | 1.0150985 | 21.59512 | 0.053791 | 17.08 |
| 823    | 2015 | 0.059 | 0.09 | 1.007521 | 1.0150985 | 21.75419 | 0.038524 | 30.31 |
| 2212   | 2015 | -0.34 | 0.09 | 1.007521 | 1.0150985 | 21.87245 | 0.031353 | 54.63 |
| 600978 | 2015 | -0.43 | 0.09 | 1.007521 | 1.0150985 | 23.26681 | 0.089144 | 23.84 |
| 823    | 2015 | -0.27 | 0.09 | 1.007521 | 1.0150985 | 22.25247 | 0.038524 | 30.31 |
| 300057 | 2015 | -0.57 | 0.09 | 1.007521 | 1.0150985 | 22.23527 | 0.023073 | 49.2  |
| 2292   | 2015 | -0.23 | 0.09 | 1.007521 | 1.0150985 | 22.29382 | 0.155727 | 48.64 |
| 300043 | 2015 | 0.395 | 0.09 | 1.007521 | 1.0150985 | 21.91752 | 0.192164 | 32.77 |
| 2292   | 2015 | -0.1  | 0.09 | 1.007521 | 1.0150985 | 22.17633 | 0.155727 | 48.64 |
| 2502   | 2015 | -0.33 | 0.09 | 1.007521 | 1.0150985 | 21.92687 | 0.039556 | 30.01 |
| 2575   | 2015 | -0.62 | 0.09 | 1.007521 | 1.0150985 | 20.69809 | 0.020325 | 44.85 |
| 2584   | 2015 | 0.075 | 0.09 | 1.007521 | 1.0150985 | 21.59512 | 0.053791 | 17.08 |
| 300281 | 2015 | -0.39 | 0.09 | 1.007521 | 1.0150985 | 20.76537 | 0.040462 | 44.42 |
| 300043 | 2015 | -0.36 | 0.09 | 1.007521 | 1.0150985 | 21.91752 | 0.192164 | 32.77 |
| 300043 | 2015 | 0.963 | 0.09 | 1.007521 | 1.0150985 | 21.91752 | 0.192164 | 32.77 |
| 2212   | 2015 | -0.34 | 0.09 | 1.007521 | 1.0150985 | 21.87245 | 0.031353 | 54.63 |

|        |      |       |      |          |          |          |          |         |
|--------|------|-------|------|----------|----------|----------|----------|---------|
| 600718 | 2015 | 1.464 | 0.01 | 1.663961 | 2.768766 | 23.21752 | 0.047941 | 15.4676 |
| 300293 | 2015 | 0.246 | 0.01 | 1.663961 | 2.768766 | 21.31137 | 0.016089 | 42.19   |
| 603609 | 2015 | -0.61 | 0.01 | 1.663961 | 2.768766 | 22.13726 | 0.110807 | 17.09   |
| 300290 | 2015 | 0.558 | 0.01 | 1.663961 | 2.768766 | 20.75004 | 0.066615 | 28.38   |
| 600718 | 2015 | 1.464 | 0.01 | 1.663961 | 2.768766 | 23.21752 | 0.047941 | 15.4676 |
| 300024 | 2015 | 1.221 | 0.01 | 1.663961 | 2.768766 | 22.52031 | 0.076232 | 25.27   |
| 410    | 2015 | 0.087 | 0.01 | 1.663961 | 2.768766 | 23.82739 | -0.28322 | 30.12   |
| 410    | 2015 | -0.57 | 0.01 | 1.663961 | 2.768766 | 23.82739 | -0.28322 | 30.12   |
| 600718 | 2015 | 1.651 | 0.01 | 1.663961 | 2.768766 | 23.21752 | 0.047941 | 15.4676 |
| 600609 | 2015 | -0.52 | 0.01 | 1.663961 | 2.768766 | 23.03006 | 0.280117 | 24.38   |
| 597    | 2015 | 0.293 | 0.01 | 1.663961 | 2.768766 | 22.88574 | -0.16333 | 21.46   |
| 300290 | 2015 | 0.079 | 0.01 | 1.663961 | 2.768766 | 20.79104 | 0.066615 | 28.38   |
| 2689   | 2015 | 0.344 | 0.01 | 1.663961 | 2.768766 | 21.67359 | 0.086156 | 39.95   |
| 698    | 2015 | -0.38 | 0.01 | 1.663961 | 2.768766 | 22.65557 | 0.048034 | 26.68   |
| 300024 | 2015 | 1.589 | 0.01 | 1.663961 | 2.768766 | 22.52031 | 0.076232 | 25.27   |
| 300290 | 2015 | 0.558 | 0.01 | 1.663961 | 2.768766 | 20.79104 | 0.066615 | 28.38   |
| 300024 | 2015 | 1.221 | 0.01 | 1.663961 | 2.768766 | 22.52031 | 0.076232 | 25.27   |
| 410    | 2015 | -0.06 | 0.01 | 1.663961 | 2.768766 | 23.82739 | -0.28322 | 30.12   |
| 597    | 2015 | 0.293 | 0.01 | 1.663961 | 2.768766 | 22.88574 | -0.16333 | 21.46   |
| 600718 | 2015 | 1.464 | 0.01 | 1.663961 | 2.768766 | 23.21752 | 0.047941 | 15.4676 |
| 300024 | 2015 | 1.589 | 0.01 | 1.663961 | 2.768766 | 22.52031 | 0.076232 | 25.27   |
| 600718 | 2015 | 1.464 | 0.01 | 1.663961 | 2.768766 | 23.21752 | 0.047941 | 15.4676 |
| 300024 | 2015 | 0.845 | 0.01 | 1.663961 | 2.768766 | 22.52031 | 0.076232 | 25.27   |
| 410    | 2015 | -0.57 | 0.01 | 1.663961 | 2.768766 | 23.82739 | -0.28322 | 30.12   |
| 698    | 2015 | -0.25 | 0.01 | 1.663961 | 2.768766 | 22.98821 | 0.048034 | 26.68   |
| 300024 | 2015 | 0.466 | 0.01 | 1.663961 | 2.768766 | 22.52031 | 0.076232 | 25.27   |
| 300290 | 2015 | 0.175 | 0.01 | 1.663961 | 2.768766 | 20.79104 | 0.066615 | 28.38   |
| 600718 | 2015 | 1.464 | 0.01 | 1.663961 | 2.768766 | 22.95585 | 0.047941 | 15.4676 |
| 600718 | 2015 | 1.464 | 0.01 | 1.663961 | 2.768766 | 23.21752 | 0.047941 | 15.4676 |
| 600609 | 2015 | -0.56 | 0.01 | 1.663961 | 2.768766 | 23.03006 | 0.280117 | 24.38   |
| 410    | 2015 | -0.57 | 0.01 | 1.663961 | 2.768766 | 23.82739 | -0.28322 | 30.12   |
| 410    | 2015 | -0.06 | 0.01 | 1.663961 | 2.768766 | 23.82739 | -0.28322 | 30.12   |
| 300024 | 2015 | 0.826 | 0.01 | 1.663961 | 2.768766 | 22.52031 | 0.076232 | 25.27   |
| 597    | 2015 | 0.293 | 0.01 | 1.663961 | 2.768766 | 22.88574 | -0.16333 | 21.46   |
| 698    | 2015 | -0.32 | 0.01 | 1.663961 | 2.768766 | 22.98821 | 0.048034 | 26.68   |
| 597    | 2015 | 0.156 | 0.01 | 1.663961 | 2.768766 | 22.88574 | -0.16333 | 21.46   |
| 2689   | 2015 | 0.36  | 0.01 | 1.663961 | 2.768766 | 21.71633 | 0.086156 | 39.95   |
| 698    | 2015 | -0.38 | 0.01 | 1.663961 | 2.768766 | 22.98821 | 0.048034 | 26.68   |
| 300293 | 2015 | 0.246 | 0.01 | 1.663961 | 2.768766 | 20.88845 | 0.016089 | 42.19   |
| 300290 | 2015 | 0.079 | 0.01 | 1.663961 | 2.768766 | 20.79104 | 0.066615 | 28.38   |
| 600718 | 2015 | 1.656 | 0.01 | 1.663961 | 2.768766 | 23.21752 | 0.047941 | 15.4676 |
| 2689   | 2015 | 0.368 | 0.01 | 1.663961 | 2.768766 | 21.67359 | 0.086156 | 39.95   |
| 2231   | 2015 | 0.007 | 0.01 | 1.663961 | 2.768766 | 20.56011 | 0.007143 | 25.36   |
| 597    | 2015 | 0.122 | 0.01 | 1.663961 | 2.768766 | 22.88574 | -0.16333 | 21.46   |
| 597    | 2015 | 0.293 | 0.01 | 1.663961 | 2.768766 | 22.67353 | -0.16333 | 21.46   |
| 2231   | 2015 | -0.58 | 0.01 | 1.663961 | 2.768766 | 20.56011 | 0.007143 | 25.36   |
| 300024 | 2015 | 1.221 | 0.01 | 1.663961 | 2.768766 | 22.52031 | 0.076232 | 25.27   |
| 603609 | 2015 | -0.93 | 0.01 | 1.663961 | 2.768766 | 22.13726 | 0.110807 | 17.09   |
| 603609 | 2015 | 0.395 | 0.01 | 1.663961 | 2.768766 | 22.13726 | 0.110807 | 17.09   |
| 600609 | 2015 | -0.52 | 0.01 | 1.663961 | 2.768766 | 23.03006 | 0.280117 | 24.38   |
| 600718 | 2015 | 1.464 | 0.01 | 1.663961 | 2.768766 | 23.21752 | 0.047941 | 15.4676 |
| 597    | 2015 | 0.293 | 0.01 | 1.663961 | 2.768766 | 22.88574 | -0.16333 | 21.46   |
| 600718 | 2015 | 1.464 | 0.01 | 1.663961 | 2.768766 | 23.21752 | 0.047941 | 15.4676 |
| 603609 | 2015 | -0.09 | 0.01 | 1.663961 | 2.768766 | 22.13726 | 0.110807 | 17.09   |



|        |      |       |      |          |           |          |          |         |
|--------|------|-------|------|----------|-----------|----------|----------|---------|
| 2689   | 2015 | 0.344 | 0.01 | 1.663961 | 2.768766  | 21.67359 | 0.086156 | 39.95   |
| 698    | 2015 | -0.28 | 0.01 | 1.663961 | 2.768766  | 22.98821 | 0.048034 | 26.68   |
| 300024 | 2015 | 1.221 | 0.01 | 1.663961 | 2.768766  | 22.52031 | 0.076232 | 25.27   |
| 603609 | 2015 | -0.93 | 0.01 | 1.663961 | 2.768766  | 22.13726 | 0.110807 | 17.09   |
| 300024 | 2015 | 1.221 | 0.01 | 1.663961 | 2.768766  | 22.60506 | 0.076232 | 25.27   |
| 603609 | 2015 | -0.17 | 0.01 | 1.663961 | 2.768766  | 22.13726 | 0.110807 | 17.09   |
| 600609 | 2015 | -0.65 | 0.01 | 1.663961 | 2.768766  | 23.03006 | 0.280117 | 24.38   |
| 600609 | 2015 | -0.52 | 0.01 | 1.663961 | 2.768766  | 23.03006 | 0.280117 | 24.38   |
| 603609 | 2015 | 0.258 | 0.01 | 1.663961 | 2.768766  | 22.13726 | 0.110807 | 17.09   |
| 300024 | 2015 | 1.438 | 0.01 | 1.663961 | 2.768766  | 22.52031 | 0.076232 | 25.27   |
| 597    | 2015 | 0.293 | 0.01 | 1.663961 | 2.768766  | 22.88574 | -0.16333 | 21.46   |
| 410    | 2015 | -0.57 | 0.01 | 1.663961 | 2.768766  | 23.82739 | -0.28322 | 30.12   |
| 698    | 2015 | -0.31 | 0.01 | 1.663961 | 2.768766  | 22.98821 | 0.048034 | 26.68   |
| 597    | 2015 | 0.293 | 0.01 | 1.663961 | 2.768766  | 22.88574 | -0.16333 | 21.46   |
| 600718 | 2015 | 1.533 | 0.01 | 1.663961 | 2.768766  | 23.21752 | 0.047941 | 15.4676 |
| 603609 | 2015 | 0.395 | 0.01 | 1.663961 | 2.768766  | 21.84172 | 0.110807 | 17.09   |
| 600609 | 2015 | -0.52 | 0.01 | 1.663961 | 2.768766  | 23.03006 | 0.280117 | 24.38   |
| 603609 | 2015 | -0.93 | 0.01 | 1.663961 | 2.768766  | 22.13726 | 0.110807 | 17.09   |
| 600718 | 2015 | 1.547 | 0.01 | 1.663961 | 2.768766  | 23.21752 | 0.047941 | 15.4676 |
| 600609 | 2015 | -0.65 | 0.01 | 1.663961 | 2.768766  | 21.55199 | 0.280117 | 24.38   |
| 600718 | 2015 | 1.919 | 0.01 | 1.663961 | 2.768766  | 23.21752 | 0.047941 | 15.4676 |
| 2231   | 2015 | -0.58 | 0.01 | 1.663961 | 2.768766  | 20.56123 | 0.007143 | 25.36   |
| 410    | 2015 | -0.57 | 0.01 | 1.663961 | 2.768766  | 23.65979 | -0.28322 | 30.12   |
| 603609 | 2015 | -0.61 | 0.01 | 1.663961 | 2.768766  | 22.13726 | 0.110807 | 17.09   |
| 597    | 2015 | 0.122 | 0.01 | 1.663961 | 2.768766  | 22.88574 | -0.16333 | 21.46   |
| 600609 | 2015 | -0.65 | 0.01 | 1.663961 | 2.768766  | 23.03006 | 0.280117 | 24.38   |
| 600609 | 2015 | -0.52 | 0.01 | 1.663961 | 2.768766  | 23.03006 | 0.280117 | 24.38   |
| 2231   | 2015 | 0.175 | 0.01 | 1.663961 | 2.768766  | 20.56011 | 0.007143 | 25.36   |
| 603609 | 2015 | 0.258 | 0.01 | 1.663961 | 2.768766  | 22.13726 | 0.110807 | 17.09   |
| 600718 | 2015 | 1.464 | 0.01 | 1.663961 | 2.768766  | 23.21752 | 0.047941 | 15.4676 |
| 2689   | 2015 | 0.368 | 0.01 | 1.663961 | 2.768766  | 21.67359 | 0.086156 | 39.95   |
| 2231   | 2015 | 0.175 | 0.01 | 1.663961 | 2.768766  | 20.56011 | 0.007143 | 25.36   |
| 300293 | 2015 | 0.246 | 0.01 | 1.663961 | 2.768766  | 21.31137 | 0.016089 | 42.19   |
| 600230 | 2015 | -0.36 | 0.02 | 1.623537 | 2.6358726 | 22.09143 | -0.4336  | 48.01   |
| 600230 | 2015 | -0.36 | 0.02 | 1.623537 | 2.6358726 | 22.10365 | -0.4336  | 48.01   |
| 2494   | 2015 | 0.638 | 0.02 | 1.623537 | 2.6358726 | 21.55611 | 0.009326 | 33.58   |
| 600230 | 2015 | -0.36 | 0.02 | 1.623537 | 2.6358726 | 22.10365 | -0.4336  | 48.01   |
| 2494   | 2015 | -0.02 | 0.02 | 1.623537 | 2.6358726 | 21.55611 | 0.009326 | 33.58   |
| 2108   | 2015 | -0.12 | 0.02 | 1.623537 | 2.6358726 | 21.48661 | 0.120209 | 30.25   |
| 2108   | 2015 | -0.47 | 0.02 | 1.623537 | 2.6358726 | 21.48661 | 0.120209 | 30.25   |
| 600230 | 2015 | -0.36 | 0.02 | 1.623537 | 2.6358726 | 22.10365 | -0.4336  | 48.01   |
| 2108   | 2015 | -0.93 | 0.02 | 1.623537 | 2.6358726 | 21.48661 | 0.120209 | 30.25   |
| 2494   | 2015 | -0.02 | 0.02 | 1.623537 | 2.6358726 | 21.49187 | 0.009326 | 33.58   |
| 2108   | 2015 | -0.93 | 0.02 | 1.623537 | 2.6358726 | 21.61341 | 0.120209 | 30.25   |
| 600230 | 2015 | -0.36 | 0.02 | 1.623537 | 2.6358726 | 22.10365 | -0.4336  | 48.01   |
| 2108   | 2015 | -0.12 | 0.02 | 1.623537 | 2.6358726 | 21.48661 | 0.120209 | 30.25   |
| 2494   | 2015 | -0.47 | 0.02 | 1.623537 | 2.6358726 | 21.55611 | 0.009326 | 33.58   |
| 2509   | 2015 | -0.66 | 0.11 | 1.269488 | 1.6115984 | 22.35406 | 0.025554 | 23.73   |
| 2029   | 2015 | -0.09 | 0.11 | 1.269488 | 1.6115984 | 22.72445 | 0.055244 | 34.29   |
| 2674   | 2015 | -0.24 | 0.11 | 1.269488 | 1.6115984 | 21.58476 | 0.008364 | 34.95   |
| 600573 | 2015 | -0.66 | 0.11 | 1.269488 | 1.6115984 | 20.88531 | 0.020286 | 50.03   |
| 600573 | 2015 | -0.9  | 0.11 | 1.269488 | 1.6115984 | 20.88844 | 0.020286 | 50.03   |
| 2578   | 2015 | -0.55 | 0.11 | 1.269488 | 1.6115984 | 20.96687 | 0.018674 | 32.05   |
| 300198 | 2015 | -0.28 | 0.11 | 1.269488 | 1.6115984 | 21.45419 | 0.04309  | 16.52   |

|        |      |       |      |          |            |          |          |       |
|--------|------|-------|------|----------|------------|----------|----------|-------|
| 2174   | 2015 | 1.48  | 0.11 | 1.269488 | 1.6115984  | 22.52526 | 0.230865 | 35.13 |
| 2029   | 2015 | -0.09 | 0.11 | 1.269488 | 1.6115984  | 22.52066 | 0.055244 | 34.29 |
| 2174   | 2015 | 1.652 | 0.11 | 1.269488 | 1.6115984  | 21.79645 | 0.230865 | 35.13 |
| 2029   | 2015 | -0.09 | 0.11 | 1.269488 | 1.6115984  | 22.72445 | 0.055244 | 34.29 |
| 603555 | 2015 | -0.52 | 0.11 | 1.269488 | 1.6115984  | 22.29754 | 0.139167 | 74.18 |
| 2098   | 2015 | -0.53 | 0.11 | 1.269488 | 1.6115984  | 21.11322 | 0.0691   | 32.19 |
| 300198 | 2015 | -0.1  | 0.11 | 1.269488 | 1.6115984  | 21.45419 | 0.04309  | 16.52 |
| 2509   | 2015 | -0.54 | 0.11 | 1.269488 | 1.6115984  | 22.35406 | 0.025554 | 23.73 |
| 2098   | 2015 | -0.53 | 0.11 | 1.269488 | 1.6115984  | 21.00548 | 0.0691   | 32.19 |
| 2578   | 2015 | -0.55 | 0.11 | 1.269488 | 1.6115984  | 20.92276 | 0.018674 | 32.05 |
| 2174   | 2015 | 1.309 | 0.11 | 1.269488 | 1.6115984  | 21.79645 | 0.230865 | 35.13 |
| 600493 | 2015 | 0.152 | 0.11 | 1.269488 | 1.6115984  | 20.72302 | 0.020313 | 10.72 |
| 603555 | 2015 | -0.52 | 0.11 | 1.269488 | 1.6115984  | 22.21757 | 0.139167 | 74.18 |
| 2674   | 2015 | -0.24 | 0.11 | 1.269488 | 1.6115984  | 21.65927 | 0.008364 | 34.95 |
| 2674   | 2015 | -0.24 | 0.11 | 1.269488 | 1.6115984  | 21.65927 | 0.008364 | 34.95 |
| 2509   | 2015 | -0.02 | 0.11 | 1.269488 | 1.6115984  | 22.14169 | 0.025554 | 23.73 |
| 600573 | 2015 | -0.9  | 0.11 | 1.269488 | 1.6115984  | 20.88844 | 0.020286 | 50.03 |
| 2509   | 2015 | -0    | 0.11 | 1.269488 | 1.6115984  | 22.35406 | 0.025554 | 23.73 |
| 2174   | 2015 | 1.423 | 0.11 | 1.269488 | 1.6115984  | 21.79645 | 0.230865 | 35.13 |
| 300198 | 2015 | -0.33 | 0.11 | 1.269488 | 1.6115984  | 21.24316 | 0.04309  | 16.52 |
| 2509   | 2015 | -0.66 | 0.11 | 1.269488 | 1.6115984  | 22.35406 | 0.025554 | 23.73 |
| 2509   | 2015 | -0.42 | 0.11 | 1.269488 | 1.6115984  | 22.35406 | 0.025554 | 23.73 |
| 2578   | 2015 | -0.55 | 0.11 | 1.269488 | 1.6115984  | 20.96687 | 0.018674 | 32.05 |
| 603555 | 2015 | -0.52 | 0.11 | 1.269488 | 1.6115984  | 22.29754 | 0.139167 | 74.18 |
| 603636 | 2015 | 1.062 | 0.11 | 1.269488 | 1.6115984  | 20.93213 | 0.070017 | 57.4  |
| 603636 | 2015 | 0.922 | 0.11 | 1.269488 | 1.6115984  | 20.93213 | 0.070017 | 57.4  |
| 600573 | 2015 | -0.74 | 0.11 | 1.269488 | 1.6115984  | 20.88844 | 0.020286 | 50.03 |
| 300198 | 2015 | -0.43 | 0.11 | 1.269488 | 1.6115984  | 21.45419 | 0.04309  | 16.52 |
| 2098   | 2015 | -0.53 | 0.11 | 1.269488 | 1.6115984  | 21.11322 | 0.0691   | 32.19 |
| 600573 | 2015 | -0.66 | 0.11 | 1.269488 | 1.6115984  | 20.88844 | 0.020286 | 50.03 |
| 2174   | 2015 | 1.652 | 0.11 | 1.269488 | 1.6115984  | 21.79645 | 0.230865 | 35.13 |
| 2098   | 2015 | -0.53 | 0.11 | 1.269488 | 1.6115984  | 21.11322 | 0.0691   | 32.19 |
| 603636 | 2015 | 1.062 | 0.11 | 1.269488 | 1.6115984  | 20.93213 | 0.070017 | 57.4  |
| 603636 | 2015 | 1.039 | 0.11 | 1.269488 | 1.6115984  | 20.92186 | 0.070017 | 57.4  |
| 600493 | 2015 | 0.152 | 0.11 | 1.269488 | 1.6115984  | 20.72302 | 0.020313 | 10.72 |
| 603636 | 2015 | 0.922 | 0.11 | 1.269488 | 1.6115984  | 20.93213 | 0.070017 | 57.4  |
| 2098   | 2015 | -0.53 | 0.11 | 1.269488 | 1.6115984  | 21.11322 | 0.0691   | 32.19 |
| 2174   | 2015 | 1.652 | 0.11 | 1.269488 | 1.6115984  | 21.79645 | 0.230865 | 35.13 |
| 2509   | 2015 | -0.54 | 0.11 | 1.269488 | 1.6115984  | 22.35406 | 0.025554 | 23.73 |
| 300198 | 2015 | -0.3  | 0.11 | 1.269488 | 1.6115984  | 21.45419 | 0.04309  | 16.52 |
| 300198 | 2015 | -0.1  | 0.11 | 1.269488 | 1.6115984  | 21.45419 | 0.04309  | 16.52 |
| 600493 | 2015 | 0.152 | 0.11 | 1.269488 | 1.6115984  | 20.62456 | 0.020313 | 10.72 |
| 2509   | 2015 | -0.66 | 0.11 | 1.269488 | 1.6115984  | 22.35406 | 0.025554 | 23.73 |
| 2509   | 2015 | -0.27 | 0.11 | 1.269488 | 1.6115984  | 22.35406 | 0.025554 | 23.73 |
| 600756 | 2015 | 1.562 | 0.05 | 0.405465 | 0.16440195 | 21.31846 | 0.109489 | 22.2  |
| 600756 | 2015 | 1.569 | 0.05 | 0.405465 | 0.16440195 | 21.36101 | 0.109489 | 22.2  |
| 600756 | 2015 | 1.562 | 0.05 | 0.405465 | 0.16440195 | 21.31846 | 0.109489 | 22.2  |
| 600756 | 2015 | 1.562 | 0.05 | 0.405465 | 0.16440195 | 21.31846 | 0.109489 | 22.2  |
| 300099 | 2015 | 0.289 | 0.05 | 0.405465 | 0.16440195 | 20.55627 | 0.040089 | 37.98 |
| 600756 | 2015 | 1.569 | 0.05 | 0.405465 | 0.16440195 | 21.31846 | 0.109489 | 22.2  |
| 600756 | 2015 | 1.562 | 0.05 | 0.405465 | 0.16440195 | 21.31846 | 0.109489 | 22.2  |
| 300099 | 2015 | 0.428 | 0.05 | 0.405465 | 0.16440195 | 20.66495 | 0.040089 | 37.98 |
| 300099 | 2015 | 0.289 | 0.05 | 0.405465 | 0.16440195 | 20.66495 | 0.040089 | 37.98 |
| 300099 | 2015 | 0.612 | 0.05 | 0.405465 | 0.16440195 | 20.66495 | 0.040089 | 37.98 |

|        |      |       |      |          |            |          |          |       |
|--------|------|-------|------|----------|------------|----------|----------|-------|
| 300099 | 2015 | 0.289 | 0.05 | 0.405465 | 0.16440195 | 20.66495 | 0.040089 | 37.98 |
| 300099 | 2015 | 0.612 | 0.05 | 0.405465 | 0.16440195 | 20.66495 | 0.040089 | 37.98 |
| 600756 | 2015 | 1.569 | 0.05 | 0.405465 | 1.64E-01   | 21.31846 | 0.109489 | 22.2  |
| 568    | 2015 | 0.126 | 0.04 | 1.31612  | 1.73E+00   | 23.30209 | 0.14965  | 26.61 |
| 2246   | 2015 | 0.347 | 0.04 | 1.31612  | 1.73E+00   | 21.18774 | 0.049889 | 16.15 |
| 568    | 2015 | 0.126 | 0.04 | 1.31612  | 1.73E+00   | 23.30209 | 0.14965  | 26.61 |
| 2246   | 2015 | -0.65 | 0.04 | 1.31612  | 1.73E+00   | 20.90164 | 0.049889 | 16.15 |
| 568    | 2015 | 0.126 | 0.04 | 1.31612  | 1.73E+00   | 23.30209 | 0.14965  | 26.61 |
| 2246   | 2015 | -0.12 | 0.04 | 1.31612  | 1.73E+00   | 21.18774 | 0.049889 | 16.15 |
| 568    | 2015 | 0.126 | 0.04 | 1.31612  | 1.73E+00   | 23.13174 | 0.14965  | 26.61 |
| 2246   | 2015 | -0.23 | 0.04 | 1.31612  | 1.7321718  | 21.18774 | 0.049889 | 16.15 |
| 568    | 2015 | 0.126 | 0.04 | 1.31612  | 1.7321718  | 23.30209 | 0.14965  | 26.61 |
| 2246   | 2015 | -0.33 | 0.04 | 1.31612  | 1.7321718  | 21.18774 | 0.049889 | 16.15 |
| 2246   | 2015 | -0.12 | 0.04 | 1.31612  | 1.7321718  | 21.18774 | 0.049889 | 16.15 |
| 2613   | 2015 | -0.07 | 0.07 | 0.253781 | 0.0644046  | 21.38823 | 0.013558 | 54.92 |
| 2179   | 2015 | 0.213 | 0.07 | 0.253781 | 0.0644046  | 22.73332 | 0.156382 | 41.57 |
| 601038 | 2015 | -0.32 | 0.07 | 0.253781 | 0.0644046  | 23.30896 | 0.025758 | 44.57 |
| 2613   | 2015 | -0.07 | 0.07 | 0.253781 | 0.0644046  | 21.38823 | 0.013558 | 54.92 |
| 601038 | 2015 | -0.33 | 0.07 | 0.253781 | 0.0644046  | 23.30896 | 0.025758 | 44.57 |
| 2046   | 2015 | 0.705 | 0.07 | 0.253781 | 0.0644046  | 21.53094 | -0.15093 | 41.07 |
| 2613   | 2015 | -0.27 | 0.07 | 0.253781 | 0.0644046  | 21.07811 | 0.013558 | 54.92 |
| 300263 | 2015 | -0.42 | 0.07 | 0.253781 | 0.0644046  | 22.01003 | 0.073963 | 21.69 |
| 2046   | 2015 | 0.821 | 0.07 | 0.253781 | 0.0644046  | 21.53094 | -0.15093 | 41.07 |
| 2046   | 2015 | 0.694 | 0.07 | 0.253781 | 0.0644046  | 21.40794 | -0.15093 | 41.07 |
| 601038 | 2015 | -0.32 | 0.07 | 0.253781 | 0.0644046  | 23.0983  | 0.025758 | 44.57 |
| 601038 | 2015 | 0.737 | 0.07 | 0.253781 | 0.0644046  | 23.30896 | 0.025758 | 44.57 |
| 2613   | 2015 | -0.11 | 0.07 | 0.253781 | 0.0644046  | 21.38823 | 0.013558 | 54.92 |
| 601038 | 2015 | -0.47 | 0.07 | 0.253781 | 0.0644046  | 23.30896 | 0.025758 | 44.57 |
| 2179   | 2015 | 0.117 | 0.07 | 0.253781 | 0.0644046  | 22.73332 | 0.156382 | 41.57 |
| 300263 | 2015 | -0.61 | 0.07 | 0.253781 | 0.0644046  | 21.83978 | 0.073963 | 21.69 |
| 601038 | 2015 | -0.59 | 0.07 | 0.253781 | 0.0644046  | 23.30896 | 0.025758 | 44.57 |
| 2046   | 2015 | 0.821 | 0.07 | 0.253781 | 0.0644046  | 21.53094 | -0.15093 | 41.07 |
| 600876 | 2015 | -0.42 | 0.07 | 0.253781 | 0.0644046  | 20.99637 | -0.4336  | 48.2  |
| 2613   | 2015 | -0.27 | 0.07 | 0.253781 | 0.0644046  | 21.38823 | 0.013558 | 54.92 |
| 600876 | 2015 | -0.42 | 0.07 | 0.253781 | 0.0644046  | 20.89479 | -0.4336  | 48.2  |
| 2560   | 2015 | -0.76 | 0.07 | 0.253781 | 0.0644046  | 21.56876 | 0.037885 | 24.22 |
| 300263 | 2015 | -0.38 | 0.07 | 0.253781 | 0.0644046  | 22.01003 | 0.073963 | 21.69 |
| 2179   | 2015 | 0.036 | 0.07 | 0.253781 | 0.0644046  | 22.73332 | 0.156382 | 41.57 |
| 2179   | 2015 | -0.21 | 0.07 | 0.253781 | 0.0644046  | 22.73332 | 0.156382 | 41.57 |
| 2613   | 2015 | -0.07 | 0.07 | 0.253781 | 0.0644046  | 21.38823 | 0.013558 | 54.92 |
| 601608 | 2015 | 0.396 | 0.07 | 0.253781 | 0.0644046  | 23.69007 | 0.007052 | 62.7  |
| 601608 | 2015 | 0.461 | 0.07 | 0.253781 | 0.0644046  | 23.75651 | 0.007052 | 62.7  |
| 601608 | 2015 | 0.437 | 0.07 | 0.253781 | 0.0644046  | 23.75651 | 0.007052 | 62.7  |
| 300263 | 2015 | -0.38 | 0.07 | 0.253781 | 0.0644046  | 22.01003 | 0.073963 | 21.69 |
| 601038 | 2015 | -0.59 | 0.07 | 0.253781 | 0.0644046  | 23.30896 | 0.025758 | 44.57 |
| 300263 | 2015 | -0.61 | 0.07 | 0.253781 | 0.0644046  | 22.01003 | 0.073963 | 21.69 |
| 601038 | 2015 | -0.59 | 0.07 | 0.253781 | 0.0644046  | 23.30896 | 0.025758 | 44.57 |
| 603993 | 2015 | -0.18 | 0.07 | 0.253781 | 0.0644046  | 24.15339 | 0.039463 | 31.56 |
| 600876 | 2015 | -0.42 | 0.07 | 0.253781 | 0.0644046  | 20.99637 | -0.4336  | 48.2  |
| 2046   | 2015 | 0.694 | 0.07 | 0.253781 | 0.0644046  | 21.53094 | -0.15093 | 41.07 |
| 603993 | 2015 | 0.135 | 0.07 | 0.253781 | 0.0644046  | 24.15339 | 0.039463 | 31.56 |
| 2613   | 2015 | -0.09 | 0.07 | 0.253781 | 0.0644046  | 21.38823 | 0.013558 | 54.92 |
| 2179   | 2015 | 0.445 | 0.07 | 0.253781 | 0.0644046  | 22.73332 | 0.156382 | 41.57 |
| 603993 | 2015 | 0.135 | 0.07 | 0.253781 | 0.0644046  | 24.15339 | 0.039463 | 31.56 |

|        |      |       |      |          |           |          |          |       |
|--------|------|-------|------|----------|-----------|----------|----------|-------|
| 603993 | 2015 | -0.18 | 0.07 | 0.253781 | 0.0644046 | 24.15339 | 0.039463 | 31.56 |
| 2613   | 2015 | -0.07 | 0.07 | 0.253781 | 0.0644046 | 21.38823 | 0.013558 | 54.92 |
| 2179   | 2015 | -0.21 | 0.07 | 0.253781 | 0.0644046 | 22.73332 | 0.156382 | 41.57 |
| 2560   | 2015 | -0.76 | 0.07 | 0.253781 | 0.0644046 | 21.56876 | 0.037885 | 24.22 |
| 2560   | 2015 | -0.76 | 0.07 | 0.253781 | 0.0644046 | 21.45219 | 0.037885 | 24.22 |
| 2179   | 2015 | -0.1  | 0.07 | 0.253781 | 0.0644046 | 22.73332 | 0.156382 | 41.57 |
| 300263 | 2015 | -0.61 | 0.07 | 0.253781 | 0.0644046 | 22.01003 | 0.073963 | 21.69 |
| 603993 | 2015 | 0.135 | 0.07 | 0.253781 | 0.0644046 | 24.15339 | 0.039463 | 31.56 |
| 300263 | 2015 | -0.38 | 0.07 | 0.253781 | 0.0644046 | 22.01003 | 0.073963 | 21.69 |
| 2613   | 2015 | -0.07 | 0.07 | 0.253781 | 0.0644046 | 21.38823 | 0.013558 | 54.92 |
| 2179   | 2015 | -0.36 | 0.07 | 0.253781 | 0.0644046 | 22.73332 | 0.156382 | 41.57 |
| 601608 | 2015 | 0.526 | 0.07 | 0.253781 | 0.0644046 | 23.75651 | 0.007052 | 62.7  |
| 2179   | 2015 | -0.07 | 0.07 | 0.253781 | 0.0644046 | 22.73332 | 0.156382 | 41.57 |
| 601608 | 2015 | 0.437 | 0.07 | 0.253781 | 0.0644046 | 23.75651 | 0.007052 | 62.7  |
| 603993 | 2015 | 0.135 | 0.07 | 0.253781 | 0.0644046 | 24.15339 | 0.039463 | 31.56 |
| 603993 | 2015 | 0.046 | 0.07 | 0.253781 | 0.0644046 | 23.9493  | 0.039463 | 31.56 |
| 2179   | 2015 | 0.276 | 0.07 | 0.253781 | 0.0644046 | 22.73332 | 0.156382 | 41.57 |
| 2179   | 2015 | 0.963 | 0.07 | 0.253781 | 0.0644046 | 22.50211 | 0.156382 | 41.57 |
| 600876 | 2015 | -0.42 | 0.07 | 0.253781 | 0.0644046 | 20.99637 | -0.4336  | 48.2  |
| 603993 | 2015 | 0.135 | 0.07 | 0.253781 | 0.0644046 | 24.15339 | 0.039463 | 31.56 |
| 300263 | 2015 | -0.38 | 0.07 | 0.253781 | 0.0644046 | 22.01003 | 0.073963 | 21.69 |
| 600876 | 2015 | -0.42 | 0.07 | 0.253781 | 0.0644046 | 20.99637 | -0.4336  | 48.2  |
| 2179   | 2015 | 0.445 | 0.07 | 0.253781 | 0.0644046 | 22.73332 | 0.156382 | 41.57 |
| 601608 | 2015 | 0.502 | 0.07 | 0.253781 | 0.0644046 | 23.75651 | 0.007052 | 62.7  |
| 2117   | 2015 | -0.38 | 0.05 | 1.355211 | 1.8365954 | 21.43072 | 0.155822 | 22.67 |
| 977    | 2015 | 0.697 | 0.05 | 1.355211 | 1.8365954 | 22.77987 | 0.157304 | 42.59 |
| 600547 | 2015 | -0.74 | 0.05 | 1.355211 | 1.8365954 | 23.84465 | 0.058463 | 50.25 |
| 600547 | 2015 | -0.95 | 0.05 | 1.355211 | 1.8365954 | 23.84465 | 0.058463 | 50.25 |
| 600022 | 2015 | -0.68 | 0.05 | 1.355211 | 1.8365954 | 24.69875 | 0.003838 | 30.26 |
| 498    | 2015 | -0.53 | 0.05 | 1.355211 | 1.8365954 | 23.0666  | 0.12425  | 60.66 |
| 2339   | 2015 | 0.751 | 0.05 | 1.355211 | 1.8365954 | 21.5752  | 0.103675 | 7.84  |
| 2598   | 2015 | -0.05 | 0.05 | 1.355211 | 1.8365954 | 20.70528 | 0.07213  | 29.81 |
| 2339   | 2015 | 0.448 | 0.05 | 1.355211 | 1.8365954 | 21.5752  | 0.103675 | 7.84  |
| 977    | 2015 | 0.584 | 0.05 | 1.355211 | 1.8365954 | 22.77987 | 0.157304 | 42.59 |
| 2117   | 2015 | -0.38 | 0.05 | 1.355211 | 1.8365954 | 21.43072 | 0.155822 | 22.67 |
| 600350 | 2015 | -0.45 | 0.05 | 1.355211 | 1.8365954 | 24.51717 | 0.111064 | 70.91 |
| 2117   | 2015 | 0.124 | 0.05 | 1.355211 | 1.8365954 | 21.43072 | 0.155822 | 22.67 |
| 2242   | 2015 | -0.59 | 0.05 | 1.355211 | 1.8365954 | 22.49662 | 0.199764 | 48.2  |
| 2242   | 2015 | -0.22 | 0.05 | 1.355211 | 1.8365954 | 22.49662 | 0.199764 | 48.2  |
| 600022 | 2015 | -0.71 | 0.05 | 1.355211 | 1.8365954 | 24.69875 | 0.003838 | 30.26 |
| 977    | 2015 | 0.483 | 0.05 | 1.355211 | 1.8365954 | 22.77987 | 0.157304 | 42.59 |
| 2270   | 2015 | -0.56 | 0.05 | 1.355211 | 1.8365954 | 22.02265 | 0.12095  | 33.34 |
| 2117   | 2015 | 0.943 | 0.05 | 1.355211 | 1.8365954 | 21.43072 | 0.155822 | 22.67 |
| 977    | 2015 | 0.697 | 0.05 | 1.355211 | 1.8365954 | 22.68976 | 0.157304 | 42.59 |
| 2117   | 2015 | -0.38 | 0.05 | 1.355211 | 1.8365954 | 21.43072 | 0.155822 | 22.67 |
| 600350 | 2015 | -0.51 | 0.05 | 1.355211 | 1.8365954 | 24.51717 | 0.111064 | 70.91 |
| 2242   | 2015 | -0.22 | 0.05 | 1.355211 | 1.8365954 | 22.08538 | 0.199764 | 48.2  |
| 498    | 2015 | -0.53 | 0.05 | 1.355211 | 1.8365954 | 21.68699 | 0.12425  | 60.66 |
| 2242   | 2015 | -0.48 | 0.05 | 1.355211 | 1.8365954 | 22.49662 | 0.199764 | 48.2  |
| 600022 | 2015 | -0.43 | 0.05 | 1.355211 | 1.8365954 | 24.69875 | 0.003838 | 30.26 |
| 600547 | 2015 | -0.75 | 0.05 | 1.355211 | 1.8365954 | 23.84465 | 0.058463 | 50.25 |
| 2270   | 2015 | -0.56 | 0.05 | 1.355211 | 1.8365954 | 21.43254 | 0.12095  | 33.34 |
| 977    | 2015 | 0.483 | 0.05 | 1.355211 | 1.8365954 | 22.77987 | 0.157304 | 42.59 |
| 2242   | 2015 | -0.53 | 0.05 | 1.355211 | 1.8365954 | 22.49662 | 0.199764 | 48.2  |

|        |      |       |      |          |            |          |          |       |
|--------|------|-------|------|----------|------------|----------|----------|-------|
| 600350 | 2015 | -0.45 | 0.05 | 1.355211 | 1.8365954  | 24.51717 | 0.111064 | 70.91 |
| 2242   | 2015 | -0.54 | 0.05 | 1.355211 | 1.8365954  | 22.49662 | 0.199764 | 48.2  |
| 2339   | 2015 | 0.87  | 0.05 | 1.355211 | 1.8365954  | 21.5752  | 0.103675 | 7.84  |
| 600350 | 2015 | -0.45 | 0.05 | 1.355211 | 1.8365954  | 24.51717 | 0.111064 | 70.91 |
| 2117   | 2015 | -0.06 | 0.05 | 1.355211 | 1.8365954  | 21.43072 | 0.155822 | 22.67 |
| 2270   | 2015 | -0.37 | 0.05 | 1.355211 | 1.8365954  | 21.43254 | 0.12095  | 33.34 |
| 2598   | 2015 | -0.05 | 0.05 | 1.355211 | 1.8365954  | 20.70528 | 0.07213  | 29.81 |
| 600022 | 2015 | -0.68 | 0.05 | 1.355211 | 1.8365954  | 24.54466 | 0.003838 | 30.26 |
| 2242   | 2015 | -0.59 | 0.05 | 1.355211 | 1.8365954  | 22.49662 | 0.199764 | 48.2  |
| 2242   | 2015 | -0.22 | 0.05 | 1.355211 | 1.8365954  | 22.49662 | 0.199764 | 48.2  |
| 498    | 2015 | -0.53 | 0.05 | 1.355211 | 1.8365954  | 23.0666  | 0.12425  | 60.66 |
| 600350 | 2015 | -0.11 | 0.05 | 1.355211 | 1.8365954  | 24.26793 | 0.111064 | 70.91 |
| 600350 | 2015 | -0.11 | 0.05 | 1.355211 | 1.8365954  | 24.51717 | 0.111064 | 70.91 |
| 2270   | 2015 | -0.49 | 0.05 | 1.355211 | 1.8365954  | 21.43254 | 0.12095  | 33.34 |
| 2117   | 2015 | -0.38 | 0.05 | 1.355211 | 1.8365954  | 21.43072 | 0.155822 | 22.67 |
| 2242   | 2015 | -0.59 | 0.05 | 1.355211 | 1.8365954  | 22.49662 | 0.199764 | 48.2  |
| 2339   | 2015 | 0.774 | 0.05 | 1.355211 | 1.8365954  | 21.5752  | 0.103675 | 7.84  |
| 2117   | 2015 | 0.045 | 0.05 | 1.355211 | 1.8365954  | 21.43072 | 0.155822 | 22.67 |
| 600022 | 2015 | -0.43 | 0.05 | 1.355211 | 1.8365954  | 24.69875 | 0.003838 | 30.26 |
| 2117   | 2015 | 0.943 | 0.05 | 1.355211 | 1.8365954  | 21.43072 | 0.155822 | 22.67 |
| 2339   | 2015 | 0.942 | 0.05 | 1.355211 | 1.84E+00   | 21.44456 | 0.103675 | 7.84  |
| 2598   | 2015 | -0.05 | 0.05 | 1.355211 | 1.84E+00   | 20.70528 | 0.07213  | 29.81 |
| 600022 | 2015 | -0.43 | 0.05 | 1.355211 | 1.84E+00   | 24.69875 | 0.003838 | 30.26 |
| 600022 | 2015 | -0.9  | 0.05 | 1.355211 | 1.84E+00   | 24.69875 | 0.003838 | 30.26 |
| 2339   | 2015 | 1.442 | 0.05 | 1.355211 | 1.84E+00   | 21.5752  | 0.103675 | 7.84  |
| 2598   | 2015 | -0.05 | 0.05 | 1.355211 | 1.84E+00   | 20.71104 | 0.07213  | 29.81 |
| 2270   | 2015 | -0.37 | 0.05 | 1.355211 | 1.84E+00   | 21.43254 | 0.12095  | 33.34 |
| 600547 | 2015 | -0.28 | 0.05 | 1.355211 | 1.84E+00   | 23.84465 | 0.058463 | 50.25 |
| 600547 | 2015 | -0.95 | 0.05 | 1.355211 | 1.84E+00   | 23.43373 | 0.058463 | 50.25 |
| 2117   | 2015 | -0.38 | 0.05 | 1.355211 | 1.84E+00   | 21.43072 | 0.155822 | 22.67 |
| 600547 | 2015 | -0.95 | 0.05 | 1.355211 | 1.84E+00   | 23.84465 | 0.058463 | 50.25 |
| 600350 | 2015 | -0.45 | 0.05 | 1.355211 | 1.8365954  | 24.51717 | 0.111064 | 70.91 |
| 2339   | 2015 | 0.942 | 0.05 | 1.355211 | 1.8365954  | 21.5752  | 0.103675 | 7.84  |
| 2117   | 2015 | -0.38 | 0.05 | 1.355211 | 1.8365954  | 21.2116  | 0.155822 | 22.67 |
| 2598   | 2015 | -0.05 | 0.05 | 1.355211 | 1.8365954  | 20.70528 | 0.07213  | 29.81 |
| 2117   | 2015 | 0.272 | 0.05 | 1.355211 | 1.8365954  | 21.43072 | 0.155822 | 22.67 |
| 977    | 2015 | 0.584 | 0.05 | 1.355211 | 1.8365954  | 22.77987 | 0.157304 | 42.59 |
| 2242   | 2015 | -0.55 | 0.05 | 1.355211 | 1.8365954  | 22.49662 | 0.199764 | 48.2  |
| 2242   | 2015 | -0.59 | 0.05 | 1.355211 | 1.8365954  | 22.49662 | 0.199764 | 48.2  |
| 600547 | 2015 | -0.74 | 0.05 | 1.355211 | 1.8365954  | 23.84465 | 0.058463 | 50.25 |
| 600022 | 2015 | -0.99 | 0.05 | 1.355211 | 1.8365954  | 24.69875 | 0.003838 | 30.26 |
| 600350 | 2015 | -0.51 | 0.05 | 1.355211 | 1.8365954  | 24.51717 | 0.111064 | 70.91 |
| 2242   | 2015 | -0.44 | 0.05 | 1.355211 | 1.8365954  | 22.49662 | 0.199764 | 48.2  |
| 2117   | 2015 | 0.272 | 0.05 | 1.355211 | 1.8365954  | 21.43072 | 0.155822 | 22.67 |
| 498    | 2015 | -0.53 | 0.05 | 1.355211 | 1.8365954  | 23.0666  | 0.12425  | 60.66 |
| 2270   | 2015 | -0.37 | 0.05 | 1.355211 | 1.8365954  | 21.43254 | 0.12095  | 33.34 |
| 977    | 2015 | 0.483 | 0.05 | 1.355211 | 1.8365954  | 22.77987 | 0.157304 | 42.59 |
| 600022 | 2015 | -0.55 | 0.05 | 1.355211 | 1.8365954  | 24.69875 | 0.003838 | 30.26 |
| 2580   | 2015 | -0.27 | 0.05 | 0.126206 | 0.01592799 | 21.31466 | 0.029077 | 12.21 |
| 2078   | 2015 | 0.331 | 0.05 | 0.126206 | 0.01592799 | 23.70479 | 0.102128 | 55.88 |
| 2193   | 2015 | -0.06 | 0.05 | 0.126206 | 0.01592799 | 21.37374 | 0.024966 | 26.29 |
| 2078   | 2015 | -0.27 | 0.05 | 0.126206 | 0.01592799 | 23.70479 | 0.102128 | 55.88 |
| 2580   | 2015 | -0.27 | 0.05 | 0.126206 | 0.01592799 | 21.31377 | 0.029077 | 12.21 |
| 600789 | 2015 | 0.672 | 0.05 | 0.126206 | 0.01592799 | 22.00213 | 0.003973 | 24.59 |

|        |      |       |      |          |            |          |          |       |
|--------|------|-------|------|----------|------------|----------|----------|-------|
| 2078   | 2015 | 0.611 | 0.05 | 0.126206 | 0.01592799 | 23.70479 | 0.102128 | 55.88 |
| 680    | 2015 | -0.24 | 0.05 | 0.126206 | 0.01592799 | 22.86007 | -0.27724 | 27.62 |
| 600789 | 2015 | -0.27 | 0.05 | 0.126206 | 0.01592799 | 22.11412 | 0.003973 | 24.59 |
| 2078   | 2015 | -0.11 | 0.05 | 0.126206 | 0.01592799 | 23.70479 | 0.102128 | 55.88 |
| 600789 | 2015 | 0.113 | 0.05 | 0.126206 | 0.01592799 | 22.11412 | 0.003973 | 24.59 |
| 2078   | 2015 | 0.011 | 0.05 | 0.126206 | 0.01592799 | 23.70479 | 0.102128 | 55.88 |
| 2078   | 2015 | -0.26 | 0.05 | 0.126206 | 0.01592799 | 23.70479 | 0.102128 | 55.88 |
| 680    | 2015 | -0.24 | 0.05 | 0.126206 | 0.01592799 | 22.96385 | -0.27724 | 27.62 |
| 680    | 2015 | -0.25 | 0.05 | 0.126206 | 0.01592799 | 22.96385 | -0.27724 | 27.62 |
| 600789 | 2015 | -0.65 | 0.05 | 0.126206 | 0.01592799 | 22.11412 | 0.003973 | 24.59 |
| 600789 | 2015 | 0.485 | 0.05 | 0.126206 | 0.01592799 | 22.11412 | 0.003973 | 24.59 |
| 2193   | 2015 | 0.109 | 0.05 | 0.126206 | 0.01592799 | 21.35664 | 0.024966 | 26.29 |
| 2193   | 2015 | -0.06 | 0.05 | 0.126206 | 0.01592799 | 21.37374 | 0.024966 | 26.29 |
| 2078   | 2015 | -0.11 | 0.05 | 0.126206 | 0.01592799 | 23.70479 | 0.102128 | 55.88 |
| 680    | 2015 | -0.25 | 0.05 | 0.126206 | 0.01592799 | 22.96385 | -0.27724 | 27.62 |
| 600789 | 2015 | 0.672 | 0.05 | 0.126206 | 0.01592799 | 22.11412 | 0.003973 | 24.59 |
| 600789 | 2015 | 0.31  | 0.05 | 0.126206 | 0.01592799 | 22.11412 | 0.003973 | 24.59 |
| 680    | 2015 | -0.17 | 0.05 | 0.126206 | 0.01592799 | 22.96385 | -0.27724 | 27.62 |
| 600789 | 2015 | -0.65 | 0.05 | 0.126206 | 0.01592799 | 22.11412 | 0.003973 | 24.59 |
| 680    | 2015 | -0.21 | 0.05 | 0.126206 | 0.01592799 | 22.96385 | -0.27724 | 27.62 |
| 2580   | 2015 | -0.27 | 0.05 | 0.126206 | 0.01592799 | 21.31377 | 0.029077 | 12.21 |
| 2078   | 2015 | 0.698 | 0.05 | 0.126206 | 0.01592799 | 23.70479 | 0.102128 | 55.88 |
| 680    | 2015 | -0.2  | 0.05 | 0.126206 | 0.01592799 | 22.96385 | -0.27724 | 27.62 |
| 2078   | 2015 | -0.31 | 0.05 | 0.126206 | 0.01592799 | 23.70479 | 0.102128 | 55.88 |
| 600789 | 2015 | -0.36 | 0.05 | 0.126206 | 0.01592799 | 22.11412 | 0.003973 | 24.59 |
| 2193   | 2015 | 0.109 | 0.05 | 0.126206 | 0.01592799 | 21.37374 | 0.024966 | 26.29 |
| 2078   | 2015 | 0.612 | 0.05 | 0.126206 | 0.01592799 | 23.41307 | 0.102128 | 55.88 |
| 2193   | 2015 | 0.166 | 0.05 | 0.126206 | 0.01592799 | 21.37374 | 0.024966 | 26.29 |
| 300086 | 2015 | 0.32  | 0.29 | 0.092976 | 0.00864447 | 21.46037 | 0.036375 | 39.49 |
| 600259 | 2015 | 4E-04 | 0.29 | 0.092976 | 0.00864447 | 21.36376 | -0.42881 | 44.31 |
| 600238 | 2015 | 0.471 | 0.29 | 0.092976 | 0.00864447 | 21.00945 | 0.014748 | 17.57 |
| 600259 | 2015 | 4E-04 | 0.29 | 0.092976 | 0.00864447 | 21.91081 | -0.42881 | 44.31 |
| 300086 | 2015 | 0.32  | 0.29 | 0.092976 | 0.00864447 | 21.46037 | 0.036375 | 39.49 |
| 300086 | 2015 | 0.32  | 0.29 | 0.092976 | 0.00864447 | 21.46037 | 0.036375 | 39.49 |
| 300086 | 2015 | 0.887 | 0.29 | 0.092976 | 0.00864447 | 21.46037 | 0.036375 | 39.49 |
| 572    | 2015 | -0.31 | 0.29 | 0.092976 | 0.00864447 | 23.57956 | 0.010505 | 28.8  |
| 572    | 2015 | -0.35 | 0.29 | 0.092976 | 0.00864447 | 22.59159 | 0.010505 | 28.8  |
| 793    | 2015 | -0.75 | 0.29 | 0.092976 | 0.00864447 | 23.04559 | 0.093669 | 7.84  |
| 300086 | 2015 | -0.44 | 0.29 | 0.092976 | 0.00864447 | 21.3249  | 0.036375 | 39.49 |
| 793    | 2015 | 0.398 | 0.29 | 0.092976 | 0.00864447 | 23.27291 | 0.093669 | 7.84  |
| 657    | 2015 | -0.3  | 0.29 | 0.092976 | 0.00864447 | 22.64459 | -0.15264 | 60.94 |
| 657    | 2015 | -0.37 | 0.29 | 0.092976 | 0.00864447 | 22.64459 | -0.15264 | 60.94 |
| 2693   | 2015 | 0.184 | 0.29 | 0.092976 | 0.00864447 | 21.16163 | 0.05679  | 33.28 |
| 657    | 2015 | -0.69 | 0.29 | 0.092976 | 0.00864447 | 21.9534  | -0.15264 | 60.94 |
| 566    | 2015 | -0.19 | 0.29 | 0.092976 | 0.00864447 | 22.30886 | 0.077936 | 29.61 |
| 2693   | 2015 | 0.184 | 0.29 | 0.092976 | 0.00864447 | 20.95316 | 0.05679  | 33.28 |
| 572    | 2015 | -0.35 | 0.29 | 0.092976 | 0.00864447 | 23.57956 | 0.010505 | 28.8  |
| 793    | 2015 | 0.398 | 0.29 | 0.092976 | 0.00864447 | 23.27291 | 0.093669 | 7.84  |
| 300189 | 2015 | 0.585 | 0.29 | 0.092976 | 0.00864447 | 21.5481  | 0.000076 | 17.73 |
| 657    | 2015 | -0.42 | 0.29 | 0.092976 | 0.00864447 | 22.64459 | -0.15264 | 60.94 |
| 300189 | 2015 | 0.585 | 0.29 | 0.092976 | 0.00864447 | 20.98918 | 0.000076 | 17.73 |
| 2693   | 2015 | 0.184 | 0.29 | 0.092976 | 0.00864447 | 21.16163 | 0.05679  | 33.28 |
| 600238 | 2015 | 0.471 | 0.29 | 0.092976 | 0.00864447 | 21.00945 | 0.014748 | 17.57 |
| 600259 | 2015 | 4E-04 | 0.29 | 0.092976 | 0.00864447 | 21.91081 | -0.42881 | 44.31 |

|        |      |       |      |          |            |          |          |       |
|--------|------|-------|------|----------|------------|----------|----------|-------|
| 600259 | 2015 | 4E-04 | 0.29 | 0.092976 | 0.00864447 | 21.91081 | -0.42881 | 44.31 |
| 600259 | 2015 | 4E-04 | 0.29 | 0.092976 | 0.00864447 | 21.91081 | -0.42881 | 44.31 |
| 600259 | 2015 | 0.115 | 0.29 | 0.092976 | 0.00864447 | 21.91081 | -0.42881 | 44.31 |
| 572    | 2015 | -0.35 | 0.29 | 0.092976 | 0.00864447 | 23.57956 | 0.010505 | 28.8  |
| 793    | 2015 | -0.84 | 0.29 | 0.092976 | 0.00864447 | 23.27291 | 0.093669 | 7.84  |
| 793    | 2015 | -0.75 | 0.29 | 0.092976 | 0.00864447 | 23.27291 | 0.093669 | 7.84  |
| 566    | 2015 | -0.17 | 0.29 | 0.092976 | 0.00864447 | 21.82683 | 0.077936 | 29.61 |
| 572    | 2015 | 0.095 | 0.29 | 0.092976 | 0.00864447 | 23.57956 | 0.010505 | 28.8  |
| 566    | 2015 | 0.501 | 0.29 | 0.092976 | 0.00864447 | 22.30886 | 0.077936 | 29.61 |
| 572    | 2015 | -0.15 | 0.29 | 0.092976 | 0.00864447 | 23.57956 | 0.010505 | 28.8  |
| 2693   | 2015 | 0.184 | 0.29 | 0.092976 | 0.00864447 | 21.16163 | 0.05679  | 33.28 |
| 657    | 2015 | -0.69 | 0.29 | 0.092976 | 0.00864447 | 22.64459 | -0.15264 | 60.94 |
| 566    | 2015 | 0.501 | 0.29 | 0.092976 | 0.00864447 | 22.30886 | 0.077936 | 29.61 |
| 572    | 2015 | -0.35 | 0.29 | 0.092976 | 0.00864447 | 23.57956 | 0.010505 | 28.8  |
| 566    | 2015 | -0.17 | 0.29 | 0.092976 | 0.00864447 | 22.30886 | 0.077936 | 29.61 |
| 600238 | 2015 | 0.471 | 0.29 | 0.092976 | 0.00864447 | 21.03572 | 0.014748 | 17.57 |
| 566    | 2015 | -0.19 | 0.29 | 0.092976 | 0.00864447 | 22.30886 | 0.077936 | 29.61 |
| 300086 | 2015 | -0.44 | 0.29 | 0.092976 | 0.00864447 | 21.46037 | 0.036375 | 39.49 |
| 657    | 2015 | -0.37 | 0.29 | 0.092976 | 0.00864447 | 22.64459 | -0.15264 | 60.94 |
| 566    | 2015 | -0.19 | 0.29 | 0.092976 | 0.00864447 | 22.30886 | 0.077936 | 29.61 |
| 793    | 2015 | 0.398 | 0.29 | 0.092976 | 0.00864447 | 23.27291 | 0.093669 | 7.84  |
| 572    | 2015 | -0.03 | 0.29 | 0.092976 | 0.00864447 | 23.57956 | 0.010505 | 28.8  |
| 572    | 2015 | -0.15 | 0.29 | 0.092976 | 0.00864447 | 23.57956 | 0.010505 | 28.8  |
| 300189 | 2015 | 0.585 | 0.29 | 0.092976 | 0.00864447 | 21.5481  | 0.000076 | 17.73 |
| 657    | 2015 | -0.42 | 0.29 | 0.092976 | 0.00864447 | 22.64459 | -0.15264 | 60.94 |
| 572    | 2015 | -0.35 | 0.29 | 0.092976 | 0.00864447 | 23.57956 | 0.010505 | 28.8  |
| 600238 | 2015 | 0.471 | 0.29 | 0.092976 | 0.00864447 | 21.00945 | 0.014748 | 17.57 |
| 793    | 2015 | 0.398 | 0.29 | 0.092976 | 0.00864447 | 23.27291 | 0.093669 | 7.84  |
| 300086 | 2015 | 0.887 | 0.29 | 0.092976 | 0.00864447 | 21.46037 | 0.036375 | 39.49 |
| 600238 | 2015 | 0.471 | 0.29 | 0.092976 | 0.00864447 | 21.00945 | 0.014748 | 17.57 |
| 657    | 2015 | -0.51 | 0.29 | 0.092976 | 0.00864447 | 22.64459 | -0.15264 | 60.94 |
| 657    | 2015 | -0.35 | 0.29 | 0.092976 | 0.00864447 | 22.64459 | -0.15264 | 60.94 |
| 657    | 2015 | -0.42 | 0.29 | 0.092976 | 0.00864447 | 22.64459 | -0.15264 | 60.94 |
| 566    | 2015 | -0.19 | 0.29 | 0.092976 | 0.00864447 | 22.30886 | 0.077936 | 29.61 |
| 657    | 2015 | -0.47 | 0.29 | 0.092976 | 0.00864447 | 22.64459 | -0.15264 | 60.94 |
| 2693   | 2015 | 0.184 | 0.29 | 0.092976 | 0.00864447 | 21.16163 | 0.05679  | 33.28 |
| 566    | 2015 | -0.19 | 0.29 | 0.092976 | 0.00864447 | 22.30886 | 0.077936 | 29.61 |
| 600259 | 2015 | -0.23 | 0.29 | 0.092976 | 8.64E-03   | 21.91081 | -0.42881 | 44.31 |
| 566    | 2015 | -0.34 | 0.29 | 0.092976 | 8.64E-03   | 22.30886 | 0.077936 | 29.61 |
| 566    | 2015 | 0.501 | 0.29 | 0.092976 | 8.64E-03   | 22.30886 | 0.077936 | 29.61 |
| 566    | 2015 | -0.19 | 0.29 | 0.092976 | 8.64E-03   | 22.30886 | 0.077936 | 29.61 |
| 657    | 2015 | -0.07 | 0.29 | 0.092976 | 8.64E-03   | 22.64459 | -0.15264 | 60.94 |
| 600259 | 2015 | 4E-04 | 0.29 | 0.092976 | 8.64E-03   | 21.91081 | -0.42881 | 44.31 |
| 600783 | 2015 | -0.75 | 0.05 | 1.329283 | 1.7669945  | 22.39447 | 0.062982 | 68.53 |
| 600783 | 2015 | 0.101 | 0.05 | 1.329283 | 1.7669945  | 22.39447 | 0.062982 | 68.53 |
| 600783 | 2015 | -0.45 | 0.05 | 1.329283 | 1.7669945  | 22.39447 | 0.062982 | 68.53 |
| 2382   | 2015 | -0.48 | 0.05 | 1.329283 | 1.7669945  | 21.12691 | 0.142057 | 50.97 |
| 2408   | 2015 | 0.712 | 0.05 | 1.329283 | 1.7669945  | 22.80875 | 0.033435 | 52.37 |
| 600783 | 2015 | -0.05 | 0.05 | 1.329283 | 1.7669945  | 22.39447 | 0.062982 | 68.53 |
| 726    | 2015 | 0.164 | 0.05 | 1.329283 | 1.7669945  | 22.93057 | 0.101083 | 14.69 |
| 2521   | 2015 | 0.038 | 0.05 | 1.329283 | 1.7669945  | 22.13362 | 0.080598 | 16.31 |
| 726    | 2015 | -0.13 | 0.05 | 1.329283 | 1.7669945  | 22.93057 | 0.101083 | 14.69 |
| 600586 | 2015 | -0.56 | 0.05 | 1.329283 | 1.7669945  | 23.00398 | 0.008929 | 31.37 |
| 300233 | 2015 | 0.136 | 0.05 | 1.329283 | 1.7669945  | 21.0802  | 0.12913  | 37.58 |

|        |      |       |      |          |           |          |          |       |
|--------|------|-------|------|----------|-----------|----------|----------|-------|
| 2469   | 2015 | 0.341 | 0.05 | 1.329283 | 1.7669945 | 21.17617 | 0.102276 | 23.1  |
| 300233 | 2015 | 0.21  | 0.05 | 1.329283 | 1.7669945 | 21.0802  | 0.12913  | 37.58 |
| 2521   | 2015 | 0.038 | 0.05 | 1.329283 | 1.7669945 | 21.82964 | 0.080598 | 16.31 |
| 300233 | 2015 | 0.136 | 0.05 | 1.329283 | 1.7669945 | 21.0802  | 0.12913  | 37.58 |
| 2581   | 2015 | 0.482 | 0.05 | 1.329283 | 1.7669945 | 21.60529 | 0.112089 | 26.38 |
| 600587 | 2015 | 0.02  | 0.05 | 1.329283 | 1.7669945 | 23.008   | 0.091341 | 28.77 |
| 2469   | 2015 | 0.214 | 0.05 | 1.329283 | 1.7669945 | 21.17617 | 0.102276 | 23.1  |
| 2088   | 2015 | 0.517 | 0.05 | 1.329283 | 1.7669945 | 21.45277 | 0.035909 | 29    |
| 2469   | 2015 | -0.11 | 0.05 | 1.329283 | 1.7669945 | 21.17617 | 0.102276 | 23.1  |
| 600587 | 2015 | -0.78 | 0.05 | 1.329283 | 1.7669945 | 23.008   | 0.091341 | 28.77 |
| 600783 | 2015 | -0.27 | 0.05 | 1.329283 | 1.7669945 | 22.39447 | 0.062982 | 68.53 |
| 600587 | 2015 | -0.65 | 0.05 | 1.329283 | 1.7669945 | 23.008   | 0.091341 | 28.77 |
| 2408   | 2015 | 0.025 | 0.05 | 1.329283 | 1.7669945 | 22.80875 | 0.033435 | 52.37 |
| 2382   | 2015 | -0.87 | 0.05 | 1.329283 | 1.7669945 | 21.12691 | 0.142057 | 50.97 |
| 2469   | 2015 | 0.684 | 0.05 | 1.329283 | 1.7669945 | 21.17617 | 0.102276 | 23.1  |
| 600587 | 2015 | -0.78 | 0.05 | 1.329283 | 1.7669945 | 23.008   | 0.091341 | 28.77 |
| 600587 | 2015 | -0.59 | 0.05 | 1.329283 | 1.7669945 | 22.55041 | 0.091341 | 28.77 |
| 2088   | 2015 | 0.517 | 0.05 | 1.329283 | 1.7669945 | 21.4659  | 0.035909 | 29    |
| 2581   | 2015 | 0.654 | 0.05 | 1.329283 | 1.7669945 | 21.60529 | 0.112089 | 26.38 |
| 300343 | 2015 | 0.459 | 0.05 | 1.329283 | 1.7669945 | 21.43478 | 0.016147 | 35.66 |
| 300343 | 2015 | 0.402 | 0.05 | 1.329283 | 1.7669945 | 21.43478 | 0.016147 | 35.66 |
| 600783 | 2015 | -0.24 | 0.05 | 1.329283 | 1.7669945 | 22.39447 | 0.062982 | 68.53 |
| 600587 | 2015 | -0.47 | 0.05 | 1.329283 | 1.7669945 | 23.008   | 0.091341 | 28.77 |
| 600586 | 2015 | -0.62 | 0.05 | 1.329283 | 1.7669945 | 23.00398 | 0.008929 | 31.37 |
| 600587 | 2015 | -0.78 | 0.05 | 1.329283 | 1.7669945 | 23.008   | 0.091341 | 28.77 |
| 600783 | 2015 | 0.101 | 0.05 | 1.329283 | 1.7669945 | 22.39447 | 0.062982 | 68.53 |
| 600783 | 2015 | -0.93 | 0.05 | 1.329283 | 1.7669945 | 22.39447 | 0.062982 | 68.53 |
| 600587 | 2015 | -0.49 | 0.05 | 1.329283 | 1.7669945 | 23.008   | 0.091341 | 28.77 |
| 600587 | 2015 | -0.78 | 0.05 | 1.329283 | 1.7669945 | 23.008   | 0.091341 | 28.77 |
| 2469   | 2015 | -0.11 | 0.05 | 1.329283 | 1.7669945 | 21.05736 | 0.102276 | 23.1  |
| 600783 | 2015 | 0.101 | 0.05 | 1.329283 | 1.7669945 | 22.39447 | 0.062982 | 68.53 |
| 600783 | 2015 | -0.6  | 0.05 | 1.329283 | 1.7669945 | 22.39447 | 0.062982 | 68.53 |
| 600783 | 2015 | -0.29 | 0.05 | 1.329283 | 1.7669945 | 22.39447 | 0.062982 | 68.53 |
| 600783 | 2015 | -0.15 | 0.05 | 1.329283 | 1.7669945 | 22.39447 | 0.062982 | 68.53 |
| 600587 | 2015 | -0.72 | 0.05 | 1.329283 | 1.7669945 | 23.008   | 0.091341 | 28.77 |
| 600587 | 2015 | -0.49 | 0.05 | 1.329283 | 1.7669945 | 23.008   | 0.091341 | 28.77 |
| 600586 | 2015 | 0.613 | 0.05 | 1.329283 | 1.7669945 | 23.00398 | 0.008929 | 31.37 |
| 300233 | 2015 | 0.136 | 0.05 | 1.329283 | 1.7669945 | 21.0802  | 0.12913  | 37.58 |
| 2521   | 2015 | 0.038 | 0.05 | 1.329283 | 1.7669945 | 22.13362 | 0.080598 | 16.31 |
| 2382   | 2015 | -0.39 | 0.05 | 1.329283 | 1.7669945 | 21.12691 | 0.142057 | 50.97 |
| 600586 | 2015 | -0.71 | 0.05 | 1.329283 | 1.7669945 | 23.00398 | 0.008929 | 31.37 |
| 600783 | 2015 | -0.59 | 0.05 | 1.329283 | 1.7669945 | 22.39447 | 0.062982 | 68.53 |
| 2671   | 2015 | -0.39 | 0.05 | 1.329283 | 1.7669945 | 21.61008 | 0.014084 | 26    |
| 2382   | 2015 | -0.48 | 0.05 | 1.329283 | 1.7669945 | 20.87285 | 0.142057 | 50.97 |
| 2382   | 2015 | -0.39 | 0.05 | 1.329283 | 1.7669945 | 21.12691 | 0.142057 | 50.97 |
| 600587 | 2015 | -0.68 | 0.05 | 1.329283 | 1.7669945 | 23.008   | 0.091341 | 28.77 |
| 726    | 2015 | -0.38 | 0.05 | 1.329283 | 1.7669945 | 22.7008  | 0.101083 | 14.69 |
| 2408   | 2015 | 0.369 | 0.05 | 1.329283 | 1.7669945 | 22.80875 | 0.033435 | 52.37 |
| 600586 | 2015 | -0.71 | 0.05 | 1.329283 | 1.7669945 | 22.60464 | 0.008929 | 31.37 |
| 2088   | 2015 | 0.517 | 0.05 | 1.329283 | 1.7669945 | 21.4659  | 0.035909 | 29    |
| 2581   | 2015 | 0.654 | 0.05 | 1.329283 | 1.7669945 | 22.05199 | 0.112089 | 26.38 |
| 300233 | 2015 | 0.353 | 0.05 | 1.329283 | 1.7669945 | 21.0802  | 0.12913  | 37.58 |
| 2671   | 2015 | -0.39 | 0.05 | 1.329283 | 1.7669945 | 21.61008 | 0.014084 | 26    |
| 600587 | 2015 | -0.78 | 0.05 | 1.329283 | 1.7669945 | 23.008   | 0.091341 | 28.77 |



|        |      |       |      |          |           |          |          |       |
|--------|------|-------|------|----------|-----------|----------|----------|-------|
| 600783 | 2015 | 0.101 | 0.05 | 1.329283 | 1.7669945 | 22.39447 | 0.062982 | 68.53 |
| 726    | 2015 | -0.38 | 0.05 | 1.329283 | 1.7669945 | 22.93057 | 0.101083 | 14.69 |
| 600587 | 2015 | -0.78 | 0.05 | 1.329283 | 1.7669945 | 23.008   | 0.091341 | 28.77 |
| 600783 | 2015 | -0.27 | 0.05 | 1.329283 | 1.7669945 | 22.39447 | 0.062982 | 68.53 |
| 2408   | 2015 | 0.369 | 0.05 | 1.329283 | 1.7669945 | 22.80875 | 0.033435 | 52.37 |
| 2581   | 2015 | 0.654 | 0.05 | 1.329283 | 1.7669945 | 21.60529 | 0.112089 | 26.38 |
| 600783 | 2015 | 0.101 | 0.05 | 1.329283 | 1.7669945 | 22.39447 | 0.062982 | 68.53 |
| 600783 | 2015 | -0.93 | 0.05 | 1.329283 | 1.7669945 | 22.39447 | 0.062982 | 68.53 |
| 600783 | 2015 | 0.101 | 0.05 | 1.329283 | 1.7669945 | 22.39447 | 0.062982 | 68.53 |
| 600586 | 2015 | -0.5  | 0.05 | 1.329283 | 1.7669945 | 23.00398 | 0.008929 | 31.37 |
| 600783 | 2015 | 0.101 | 0.05 | 1.329283 | 1.7669945 | 22.39447 | 0.062982 | 68.53 |
| 600587 | 2015 | -0.78 | 0.05 | 1.329283 | 1.7669945 | 23.008   | 0.091341 | 28.77 |
| 300233 | 2015 | 0.31  | 0.05 | 1.329283 | 1.7669945 | 21.41456 | 0.12913  | 37.58 |
| 2469   | 2015 | 0.341 | 0.05 | 1.329283 | 1.7669945 | 21.17617 | 0.102276 | 23.1  |
| 600586 | 2015 | -0.71 | 0.05 | 1.329283 | 1.7669945 | 23.00398 | 0.008929 | 31.37 |
| 2581   | 2015 | 0.539 | 0.05 | 1.329283 | 1.7669945 | 21.60529 | 0.112089 | 26.38 |
| 600783 | 2015 | 0.258 | 0.05 | 1.329283 | 1.7669945 | 22.39447 | 0.062982 | 68.53 |
| 600783 | 2015 | 0.166 | 0.05 | 1.329283 | 1.7669945 | 22.39447 | 0.062982 | 68.53 |
| 600783 | 2015 | 0.395 | 0.05 | 1.329283 | 1.7669945 | 21.9144  | 0.062982 | 68.53 |
| 600783 | 2015 | 0.101 | 0.05 | 1.329283 | 1.7669945 | 22.39447 | 0.062982 | 68.53 |
| 600783 | 2015 | 0.101 | 0.05 | 1.329283 | 1.7669945 | 22.39447 | 0.062982 | 68.53 |
| 2382   | 2015 | -0.87 | 0.05 | 1.329283 | 1.7669945 | 21.12691 | 0.142057 | 50.97 |
| 300343 | 2015 | -0.06 | 0.05 | 1.329283 | 1.7669945 | 21.63045 | 0.016147 | 35.66 |
| 2382   | 2015 | -0.48 | 0.05 | 1.329283 | 1.7669945 | 21.12691 | 0.142057 | 50.97 |
| 600586 | 2015 | -0.5  | 0.05 | 1.329283 | 1.7669945 | 23.00398 | 0.008929 | 31.37 |
| 2521   | 2015 | 0.038 | 0.05 | 1.329283 | 1.7669945 | 22.13362 | 0.080598 | 16.31 |
| 2408   | 2015 | 0.025 | 0.05 | 1.329283 | 1.7669945 | 22.80875 | 0.033435 | 52.37 |
| 300233 | 2015 | 0.394 | 0.05 | 1.329283 | 1.7669945 | 21.0802  | 0.12913  | 37.58 |
| 2408   | 2015 | 0.598 | 0.05 | 1.329283 | 1.7669945 | 22.75356 | 0.033435 | 52.37 |
| 600587 | 2015 | -0.58 | 0.05 | 1.329283 | 1.7669945 | 23.008   | 0.091341 | 28.77 |
| 600587 | 2015 | -0.78 | 0.05 | 1.329283 | 1.7669945 | 23.008   | 0.091341 | 28.77 |
| 300233 | 2015 | 0.136 | 0.05 | 1.329283 | 1.7669945 | 21.0802  | 0.12913  | 37.58 |
| 300233 | 2015 | 0.331 | 0.05 | 1.329283 | 1.7669945 | 21.0802  | 0.12913  | 37.58 |
| 300343 | 2015 | 0.402 | 0.05 | 1.329283 | 1.7669945 | 21.63045 | 0.016147 | 35.66 |
| 2088   | 2015 | 0.517 | 0.05 | 1.329283 | 1.7669945 | 21.4659  | 0.035909 | 29    |
| 600587 | 2015 | -0.78 | 0.05 | 1.329283 | 1.7669945 | 23.008   | 0.091341 | 28.77 |
| 600783 | 2015 | 0.101 | 0.05 | 1.329283 | 1.7669945 | 22.39447 | 0.062982 | 68.53 |
| 600783 | 2015 | 0.101 | 0.05 | 1.329283 | 1.7669945 | 22.39447 | 0.062982 | 68.53 |
| 600783 | 2015 | -0.02 | 0.05 | 1.329283 | 1.7669945 | 22.39447 | 0.062982 | 68.53 |
| 600783 | 2015 | 0.395 | 0.05 | 1.329283 | 1.7669945 | 22.39447 | 0.062982 | 68.53 |
| 600587 | 2015 | -0.57 | 0.05 | 1.329283 | 1.7669945 | 23.008   | 0.091341 | 28.77 |
| 2581   | 2015 | 0.654 | 0.05 | 1.329283 | 1.7669945 | 21.60529 | 0.112089 | 26.38 |
| 2469   | 2015 | 0.214 | 0.05 | 1.329283 | 1.7669945 | 21.17617 | 0.102276 | 23.1  |
| 2521   | 2015 | 0.038 | 0.05 | 1.329283 | 1.7669945 | 22.13362 | 0.080598 | 16.31 |
| 600587 | 2015 | -0.78 | 0.05 | 1.329283 | 1.7669945 | 23.008   | 0.091341 | 28.77 |
| 600783 | 2015 | -0.27 | 0.05 | 1.329283 | 1.7669945 | 22.39447 | 0.062982 | 68.53 |
| 2382   | 2015 | -0.51 | 0.05 | 1.329283 | 1.7669945 | 21.12691 | 0.142057 | 50.97 |
| 600783 | 2015 | 0.237 | 0.05 | 1.329283 | 1.7669945 | 22.39447 | 0.062982 | 68.53 |
| 600783 | 2015 | -0.31 | 0.05 | 1.329283 | 1.7669945 | 22.39447 | 0.062982 | 68.53 |
| 2088   | 2015 | 0.517 | 0.05 | 1.329283 | 1.7669945 | 21.4659  | 0.035909 | 29    |
| 600587 | 2015 | 0.2   | 0.05 | 1.329283 | 1.7669945 | 23.008   | 0.091341 | 28.77 |
| 600587 | 2015 | -0.65 | 0.05 | 1.329283 | 1.7669945 | 23.008   | 0.091341 | 28.77 |
| 726    | 2015 | 0.164 | 0.05 | 1.329283 | 1.7669945 | 22.93057 | 0.101083 | 14.69 |
| 2581   | 2015 | 0.482 | 0.05 | 1.329283 | 1.7669945 | 21.60529 | 0.112089 | 26.38 |

|        |      |       |      |          |            |          |          |       |
|--------|------|-------|------|----------|------------|----------|----------|-------|
| 2671   | 2015 | -0.39 | 0.05 | 1.329283 | 1.7669945  | 21.6264  | 0.014084 | 26    |
| 300233 | 2015 | 0.685 | 0.05 | 1.329283 | 1.7669945  | 21.0802  | 0.12913  | 37.58 |
| 2469   | 2015 | 0.684 | 0.05 | 1.329283 | 1.7669945  | 21.17617 | 0.102276 | 23.1  |
| 600587 | 2015 | -0.78 | 0.05 | 1.329283 | 1.7669945  | 23.008   | 0.091341 | 28.77 |
| 2042   | 2015 | -0.21 | 0.09 | 0.241777 | 0.05845605 | 22.96373 | 0.0906   | 41.67 |
| 2042   | 2015 | -0.21 | 0.09 | 0.241777 | 0.05845605 | 22.03892 | 0.0906   | 41.67 |
| 2042   | 2015 | -0.21 | 0.09 | 0.241777 | 0.05845605 | 22.96373 | 0.0906   | 41.67 |
| 603369 | 2015 | -0.83 | 0.09 | 0.092976 | 0.00864447 | 22.41399 | 0.168859 | 44.72 |
| 603369 | 2015 | -0.83 | 0.09 | 0.092976 | 0.00864447 | 22.41399 | 0.168859 | 44.72 |
| 603369 | 2015 | -0.83 | 0.09 | 0.092976 | 0.00864447 | 22.30006 | 0.168859 | 44.72 |
| 601877 | 2015 | -0.2  | 0.12 | 1.274773 | 1.6250454  | 23.21739 | 0.263099 | 64.96 |
| 300283 | 2015 | -0.13 | 0.12 | 1.274773 | 1.6250454  | 20.47025 | 0.004337 | 59.26 |
| 300032 | 2015 | -0.68 | 0.12 | 1.274773 | 1.6250454  | 22.08612 | 0.13501  | 44.98 |
| 300032 | 2015 | -0.54 | 0.12 | 1.274773 | 1.6250454  | 22.08612 | 0.13501  | 44.98 |
| 2687   | 2015 | -0.79 | 0.12 | 1.274773 | 1.6250454  | 21.04171 | 0.058212 | 13.54 |
| 600290 | 2015 | -0.67 | 0.12 | 1.274773 | 1.6250454  | 22.71734 | 0.014009 | 32.19 |
| 2730   | 2015 | -0.18 | 0.12 | 1.274773 | 1.6250454  | 20.99152 | 0.065537 | 51.14 |
| 2154   | 2015 | -0.8  | 0.12 | 1.274773 | 1.6250454  | 22.2348  | 0.035755 | 10.53 |
| 600290 | 2015 | -0.34 | 0.12 | 1.274773 | 1.6250454  | 22.71734 | 0.014009 | 32.19 |
| 300032 | 2015 | -0.12 | 0.12 | 1.274773 | 1.6250454  | 22.08612 | 0.13501  | 44.98 |
| 601877 | 2015 | -0.37 | 0.12 | 1.274773 | 1.6250454  | 23.21739 | 0.263099 | 64.96 |
| 300032 | 2015 | -0.6  | 0.12 | 1.274773 | 1.6250454  | 22.08612 | 0.13501  | 44.98 |
| 2154   | 2015 | -0.68 | 0.12 | 1.274773 | 1.6250454  | 22.2348  | 0.035755 | 10.53 |
| 300349 | 2015 | 0.464 | 0.12 | 1.274773 | 1.6250454  | 20.94972 | 0.089359 | 36.34 |
| 2730   | 2015 | -0.18 | 0.12 | 1.274773 | 1.6250454  | 20.99152 | 0.065537 | 51.14 |
| 600290 | 2015 | -0.35 | 0.12 | 1.274773 | 1.6250454  | 22.44474 | 0.014009 | 32.19 |
| 2154   | 2015 | -0.7  | 0.12 | 1.274773 | 1.6250454  | 22.2348  | 0.035755 | 10.53 |
| 300412 | 2015 | -0.35 | 0.12 | 1.274773 | 1.6250454  | 20.10336 | 0.129766 | 39.33 |
| 300412 | 2015 | -0.34 | 0.12 | 1.274773 | 1.6250454  | 20.10336 | 0.129766 | 39.33 |
| 300032 | 2015 | -0.12 | 0.12 | 1.274773 | 1.6250454  | 22.08612 | 0.13501  | 44.98 |
| 300032 | 2015 | -0.6  | 0.12 | 1.274773 | 1.6250454  | 22.08612 | 0.13501  | 44.98 |
| 300283 | 2015 | -0.13 | 0.12 | 1.274773 | 1.6250454  | 20.54251 | 0.004337 | 59.26 |
| 2687   | 2015 | -0.79 | 0.12 | 1.274773 | 1.6250454  | 21.04171 | 0.058212 | 13.54 |
| 601877 | 2015 | -0.08 | 0.12 | 1.274773 | 1.6250454  | 23.21739 | 0.263099 | 64.96 |
| 2687   | 2015 | -0.79 | 0.12 | 1.274773 | 1.6250454  | 21.04171 | 0.058212 | 13.54 |
| 2154   | 2015 | -0.8  | 0.12 | 1.274773 | 1.6250454  | 22.1137  | 0.035755 | 10.53 |
| 300349 | 2015 | 0.464 | 0.12 | 1.274773 | 1.6250454  | 20.90093 | 0.089359 | 36.34 |
| 300349 | 2015 | 0.197 | 0.12 | 1.274773 | 1.6250454  | 20.94972 | 0.089359 | 36.34 |
| 2629   | 2015 | -0.42 | 0.12 | 1.274773 | 1.6250454  | 20.53303 | -0.14963 | 13.57 |
| 300032 | 2015 | -0.54 | 0.12 | 1.274773 | 1.6250454  | 22.08612 | 0.13501  | 44.98 |
| 2154   | 2015 | -0.8  | 0.12 | 1.274773 | 1.6250454  | 22.2348  | 0.035755 | 10.53 |
| 600290 | 2015 | -0.43 | 0.12 | 1.274773 | 1.6250454  | 22.71734 | 0.014009 | 32.19 |
| 2154   | 2015 | -0.8  | 0.12 | 1.274773 | 1.6250454  | 22.2348  | 0.035755 | 10.53 |
| 2154   | 2015 | -0.68 | 0.12 | 1.274773 | 1.6250454  | 22.2348  | 0.035755 | 10.53 |
| 2154   | 2015 | -0.8  | 0.12 | 1.274773 | 1.6250454  | 22.2348  | 0.035755 | 10.53 |
| 601877 | 2015 | -0.59 | 0.12 | 1.274773 | 1.6250454  | 23.03466 | 0.263099 | 64.96 |
| 600290 | 2015 | -0.35 | 0.12 | 1.274773 | 1.6250454  | 22.71734 | 0.014009 | 32.19 |
| 600290 | 2015 | -0.44 | 0.12 | 1.274773 | 1.6250454  | 22.71734 | 0.014009 | 32.19 |
| 2730   | 2015 | -0.18 | 0.12 | 1.274773 | 1.6250454  | 20.99152 | 0.065537 | 51.14 |
| 2687   | 2015 | -0.79 | 0.12 | 1.274773 | 1.6250454  | 21.04171 | 0.058212 | 13.54 |
| 601877 | 2015 | -0.24 | 0.12 | 1.274773 | 1.6250454  | 23.21739 | 0.263099 | 64.96 |
| 2154   | 2015 | -0.8  | 0.12 | 1.274773 | 1.6250454  | 22.2348  | 0.035755 | 10.53 |
| 601877 | 2015 | -0.59 | 0.12 | 1.274773 | 1.6250454  | 23.21739 | 0.263099 | 64.96 |
| 300032 | 2015 | -0.6  | 0.12 | 1.274773 | 1.6250454  | 22.08612 | 0.13501  | 44.98 |

|        |      |       |      |          |            |          |          |       |
|--------|------|-------|------|----------|------------|----------|----------|-------|
| 2730   | 2015 | -0.19 | 0.12 | 1.274773 | 1.6250454  | 20.75363 | 0.065537 | 51.14 |
| 300349 | 2015 | 0.256 | 0.12 | 1.274773 | 1.6250454  | 20.94972 | 0.089359 | 36.34 |
| 300349 | 2015 | 0.256 | 0.12 | 1.274773 | 1.6250454  | 20.94972 | 0.089359 | 36.34 |
| 600290 | 2015 | -0.35 | 0.12 | 1.274773 | 1.6250454  | 22.71734 | 0.014009 | 32.19 |
| 300032 | 2015 | -0.6  | 0.12 | 1.274773 | 1.6250454  | 21.8255  | 0.13501  | 44.98 |
| 2064   | 2015 | 0.059 | 0.12 | 1.274773 | 1.6250454  | 22.40689 | 0.075768 | 29.66 |
| 2563   | 2015 | 0.066 | 0.12 | 1.274773 | 1.6250454  | 23.17896 | 0.144978 | 17.23 |
| 601877 | 2015 | -0.43 | 0.12 | 1.274773 | 1.6250454  | 23.21739 | 0.263099 | 64.96 |
| 300032 | 2015 | -0.6  | 0.12 | 1.274773 | 1.6250454  | 22.08612 | 0.13501  | 44.98 |
| 300412 | 2015 | -0.35 | 0.12 | 1.274773 | 1.6250454  | 20.10336 | 0.129766 | 39.33 |
| 2730   | 2015 | -0.19 | 0.12 | 1.274773 | 1.6250454  | 20.99152 | 0.065537 | 51.14 |
| 2064   | 2015 | 0.059 | 0.12 | 1.274773 | 1.6250454  | 22.16885 | 0.075768 | 29.66 |
| 601877 | 2015 | -0.59 | 0.12 | 1.274773 | 1.6250454  | 23.21739 | 0.263099 | 64.96 |
| 600290 | 2015 | -0.23 | 0.12 | 1.274773 | 1.6250454  | 22.71734 | 0.014009 | 32.19 |
| 603001 | 2015 | -0.79 | 0.12 | 1.274773 | 1.6250454  | 22.45411 | 0.095386 | 32.73 |
| 601877 | 2015 | -0.59 | 0.12 | 1.274773 | 1.6250454  | 23.21739 | 0.263099 | 64.96 |
| 600290 | 2015 | -0.43 | 0.12 | 1.274773 | 1.6250454  | 22.71734 | 0.014009 | 32.19 |
| 2687   | 2015 | -0.79 | 0.12 | 1.274773 | 1.6250454  | 20.88428 | 0.058212 | 13.54 |
| 2629   | 2015 | -0.34 | 0.12 | 1.274773 | 1.6250454  | 20.53303 | -0.14963 | 13.57 |
| 300412 | 2015 | -0.38 | 0.12 | 1.274773 | 1.6250454  | 20.10336 | 0.129766 | 39.33 |
| 2687   | 2015 | -0.79 | 0.12 | 1.274773 | 1.6250454  | 21.04171 | 0.058212 | 13.54 |
| 601877 | 2015 | -0.59 | 0.12 | 1.274773 | 1.6250454  | 23.21739 | 0.263099 | 64.96 |
| 601877 | 2015 | -0.24 | 0.12 | 1.274773 | 1.6250454  | 23.21739 | 0.263099 | 64.96 |
| 2629   | 2015 | -0.35 | 0.12 | 1.274773 | 1.6250454  | 20.53303 | -0.14963 | 13.57 |
| 2629   | 2015 | -0.34 | 0.12 | 1.274773 | 1.6250454  | 20.53303 | -0.14963 | 13.57 |
| 2730   | 2015 | -0.18 | 0.12 | 1.274773 | 1.6250454  | 20.99152 | 0.065537 | 51.14 |
| 601877 | 2015 | -0.55 | 0.12 | 1.274773 | 1.6250454  | 23.21739 | 0.263099 | 64.96 |
| 600290 | 2015 | -0.51 | 0.12 | 1.274773 | 1.6250454  | 22.71734 | 0.014009 | 32.19 |
| 300349 | 2015 | 0.464 | 0.12 | 1.274773 | 1.6250454  | 20.94972 | 0.089359 | 36.34 |
| 300412 | 2015 | -0.49 | 0.12 | 1.274773 | 1.6250454  | 20.10336 | 0.129766 | 39.33 |
| 603001 | 2015 | -0.79 | 0.12 | 1.274773 | 1.6250454  | 22.2432  | 0.095386 | 32.73 |
| 603001 | 2015 | -0.79 | 0.12 | 1.274773 | 1.6250454  | 22.45411 | 0.095386 | 32.73 |
| 2730   | 2015 | -0.19 | 0.12 | 1.274773 | 1.6250454  | 20.99152 | 0.065537 | 51.14 |
| 300032 | 2015 | -0.36 | 0.12 | 1.274773 | 1.6250454  | 22.08612 | 0.13501  | 44.98 |
| 601877 | 2015 | -0.2  | 0.12 | 1.274773 | 1.6250454  | 23.21739 | 0.263099 | 64.96 |
| 2629   | 2015 | -0.42 | 0.12 | 1.274773 | 1.6250454  | 20.53303 | -0.14963 | 13.57 |
| 2064   | 2015 | 0.059 | 0.12 | 1.274773 | 1.6250454  | 22.40689 | 0.075768 | 29.66 |
| 2629   | 2015 | -0.42 | 0.12 | 1.274773 | 1.6250454  | 20.53303 | -0.14963 | 13.57 |
| 2563   | 2015 | 0.066 | 0.12 | 1.274773 | 1.6250454  | 23.17896 | 0.144978 | 17.23 |
| 300283 | 2015 | -0.13 | 0.12 | 1.274773 | 1.6250454  | 20.47025 | 0.004337 | 59.26 |
| 2563   | 2015 | 0.066 | 0.12 | 1.274773 | 1.6250454  | 23.16841 | 0.144978 | 17.23 |
| 2629   | 2015 | -0.42 | 0.12 | 1.274773 | 1.6250454  | 20.45621 | -0.14963 | 13.57 |
| 300412 | 2015 | -0.36 | 0.12 | 1.274773 | 1.6250454  | 20.10336 | 0.129766 | 39.33 |
| 2043   | 2015 | -0.03 | 0.12 | 0.006384 | 0.00004075 | 20.67448 | 0.10593  | 33.27 |
| 2443   | 2015 | -0.25 | 0.12 | 0.006384 | 0.00004075 | 21.49324 | 0.042942 | 9.03  |
| 2427   | 2015 | -0.36 | 0.12 | 0.006384 | 0.00004075 | 21.84396 | 0.048338 | 31.24 |
| 2318   | 2015 | -0.55 | 0.12 | 0.006384 | 0.00004075 | 22.0169  | 0.044309 | 36.23 |
| 2427   | 2015 | -0.36 | 0.12 | 0.006384 | 0.00004075 | 21.84396 | 0.048338 | 31.24 |
| 2034   | 2015 | -0.54 | 0.12 | 0.006384 | 0.00004075 | 20.49636 | 0.083844 | 34.24 |
| 600226 | 2015 | 0.473 | 0.12 | 0.006384 | 0.00004075 | 21.5279  | 0.094801 | 15    |
| 600226 | 2015 | -0.24 | 0.12 | 0.006384 | 0.00004075 | 21.5279  | 0.094801 | 15    |
| 2318   | 2015 | -0.64 | 0.12 | 0.006384 | 0.00004075 | 21.93211 | 0.044309 | 36.23 |
| 2318   | 2015 | -0.2  | 0.12 | 0.006384 | 0.00004075 | 22.0169  | 0.044309 | 36.23 |
| 2034   | 2015 | -0.54 | 0.12 | 0.006384 | 0.00004075 | 20.49636 | 0.083844 | 34.24 |

|        |      |       |      |          |            |          |          |       |
|--------|------|-------|------|----------|------------|----------|----------|-------|
| 600226 | 2015 | 0.075 | 0.12 | 0.006384 | 0.00004075 | 21.5279  | 0.094801 | 15    |
| 2443   | 2015 | -0.44 | 0.12 | 0.006384 | 0.00004075 | 21.72997 | 0.042942 | 9.03  |
| 2082   | 2015 | -0.56 | 0.12 | 0.006384 | 0.00004075 | 20.91635 | 0.050805 | 18.88 |
| 2443   | 2015 | -0.25 | 0.12 | 0.006384 | 0.00004075 | 21.72997 | 0.042942 | 9.03  |
| 2043   | 2015 | 0.022 | 0.12 | 0.006384 | 0.00004075 | 20.67448 | 0.10593  | 33.27 |
| 2443   | 2015 | -0.32 | 0.12 | 0.006384 | 0.00004075 | 21.72997 | 0.042942 | 9.03  |
| 2043   | 2015 | -0.48 | 0.12 | 0.006384 | 0.00004075 | 20.67448 | 0.10593  | 33.27 |
| 2318   | 2015 | -0.54 | 0.12 | 0.006384 | 0.00004075 | 22.0169  | 0.044309 | 36.23 |
| 2082   | 2015 | -0.62 | 0.12 | 0.006384 | 0.00004075 | 20.91635 | 0.050805 | 18.88 |
| 2082   | 2015 | -0.56 | 0.12 | 0.006384 | 0.00004075 | 20.91635 | 0.050805 | 18.88 |
| 2034   | 2015 | -0.54 | 0.12 | 0.006384 | 0.00004075 | 20.42937 | 0.083844 | 34.24 |
| 600226 | 2015 | 0.226 | 0.12 | 0.006384 | 0.00004075 | 21.46764 | 0.094801 | 15    |
| 600226 | 2015 | -0.24 | 0.12 | 0.006384 | 0.00004075 | 21.5279  | 0.094801 | 15    |
| 2082   | 2015 | -0.78 | 0.12 | 0.006384 | 0.00004075 | 20.91635 | 0.050805 | 18.88 |
| 600226 | 2015 | 0.075 | 0.12 | 0.006384 | 0.00004075 | 21.5279  | 0.094801 | 15    |
| 2043   | 2015 | -0.48 | 0.12 | 0.006384 | 0.00004075 | 20.67448 | 0.10593  | 33.27 |
| 600226 | 2015 | 0.041 | 0.12 | 0.006384 | 0.00004075 | 21.5279  | 0.094801 | 15    |
| 2034   | 2015 | -0.54 | 0.12 | 0.006384 | 0.00004075 | 20.49636 | 0.083844 | 34.24 |
| 2427   | 2015 | -0.54 | 0.12 | 0.006384 | 0.00004075 | 21.84396 | 0.048338 | 31.24 |
| 2034   | 2015 | -0.54 | 0.12 | 0.006384 | 0.00004075 | 20.49636 | 0.083844 | 34.24 |
| 2443   | 2015 | -0.44 | 0.12 | 0.006384 | 0.00004075 | 21.72997 | 0.042942 | 9.03  |
| 2034   | 2015 | -0.54 | 0.12 | 0.006384 | 0.00004075 | 20.49636 | 0.083844 | 34.24 |
| 2443   | 2015 | -0.38 | 0.12 | 0.006384 | 0.00004075 | 21.72997 | 0.042942 | 9.03  |
| 2318   | 2015 | -0.55 | 0.12 | 0.006384 | 0.00004075 | 22.0169  | 0.044309 | 36.23 |
| 2082   | 2015 | -0.78 | 0.12 | 0.006384 | 0.00004075 | 21.20401 | 0.050805 | 18.88 |
| 2443   | 2015 | -0.32 | 0.12 | 0.006384 | 0.00004075 | 21.72997 | 0.042942 | 9.03  |
| 600226 | 2015 | 0.075 | 0.12 | 0.006384 | 0.00004075 | 21.5279  | 0.094801 | 15    |
| 600226 | 2015 | 0.075 | 0.12 | 0.006384 | 0.00004075 | 21.5279  | 0.094801 | 15    |
| 2318   | 2015 | -0.55 | 0.12 | 0.006384 | 0.00004075 | 22.0169  | 0.044309 | 36.23 |
| 2427   | 2015 | -0.54 | 0.12 | 0.006384 | 0.00004075 | 21.80697 | 0.048338 | 31.24 |
| 2318   | 2015 | -0.2  | 0.12 | 0.006384 | 0.00004075 | 22.0169  | 0.044309 | 36.23 |
| 2427   | 2015 | -0.4  | 0.12 | 0.006384 | 0.00004075 | 21.84396 | 0.048338 | 31.24 |
| 2043   | 2015 | 0.022 | 0.12 | 0.006384 | 0.00004075 | 20.87654 | 0.10593  | 33.27 |
| 2318   | 2015 | -0.29 | 0.12 | 0.006384 | 0.00004075 | 22.0169  | 0.044309 | 36.23 |
| 600226 | 2015 | 0.075 | 0.12 | 0.006384 | 0.00004075 | 21.5279  | 0.094801 | 15    |
| 2034   | 2015 | -0.54 | 0.12 | 0.006384 | 0.00004075 | 20.49636 | 0.083844 | 34.24 |
| 600433 | 2015 | -0.01 | 0.09 | 0.983238 | 0.9667579  | 22.1077  | 0.01421  | 29.1  |
| 600433 | 2015 | -0.23 | 0.09 | 0.983238 | 0.9667579  | 22.1077  | 0.01421  | 29.1  |
| 600433 | 2015 | 0.488 | 0.09 | 0.983238 | 0.9667579  | 22.07518 | 0.01421  | 29.1  |
| 600433 | 2015 | 0.488 | 0.09 | 0.983238 | 0.9667579  | 22.1077  | 0.01421  | 29.1  |
| 600433 | 2015 | -0.23 | 0.09 | 0.983238 | 0.9667579  | 22.1077  | 0.01421  | 29.1  |
| 600218 | 2015 | -0.29 | 0.09 | 0.125494 | 0.01574866 | 21.83686 | 0.041255 | 34.32 |
| 2597   | 2015 | 0.076 | 0.09 | 0.125494 | 0.01574866 | 22.01456 | 0.083723 | 50.91 |
| 2597   | 2015 | 0.111 | 0.09 | 0.125494 | 0.01574866 | 22.01456 | 0.083723 | 50.91 |
| 600218 | 2015 | -0.63 | 0.09 | 0.125494 | 0.01574866 | 21.83686 | 0.041255 | 34.32 |
| 2597   | 2015 | 0.164 | 0.09 | 0.125494 | 0.01574866 | 21.77552 | 0.083723 | 50.91 |
| 600218 | 2015 | -0.38 | 0.09 | 0.125494 | 0.01574866 | 21.83686 | 0.041255 | 34.32 |
| 2571   | 2015 | -0.63 | 0.09 | 0.125494 | 0.01574866 | 21.52471 | -0.04127 | 41.97 |
| 600218 | 2015 | -0.38 | 0.09 | 0.125494 | 0.01574866 | 21.69742 | 0.041255 | 34.32 |
| 600218 | 2015 | -0.63 | 0.09 | 0.125494 | 0.01574866 | 21.83686 | 0.041255 | 34.32 |
| 2597   | 2015 | 0.164 | 0.09 | 0.125494 | 0.01574866 | 22.01456 | 0.083723 | 50.91 |
| 600218 | 2015 | -0.38 | 0.09 | 0.125494 | 0.01574866 | 21.83686 | 0.041255 | 34.32 |
| 2571   | 2015 | -0.63 | 0.09 | 0.125494 | 0.01574866 | 21.49718 | -0.04127 | 41.97 |
| 2571   | 2015 | -0.63 | 0.09 | 0.125494 | 0.01574866 | 21.52471 | -0.04127 | 41.97 |

|        |      |       |      |          |            |          |          |       |
|--------|------|-------|------|----------|------------|----------|----------|-------|
| 600218 | 2015 | -0.39 | 0.09 | 0.125494 | 0.01574866 | 21.83686 | 0.041255 | 34.32 |
| 2597   | 2015 | 0.076 | 0.09 | 0.125494 | 0.01574866 | 22.01456 | 0.083723 | 50.91 |
| 600448 | 2015 | 1.235 | 0.05 | 0.305382 | 0.09325802 | 21.61094 | 0.014956 | 15.31 |
| 639    | 2015 | -0.29 | 0.05 | 0.305382 | 0.09325802 | 20.69376 | 0.107567 | 42.13 |
| 601678 | 2015 | -0.27 | 0.05 | 0.305382 | 0.09325802 | 22.70704 | 0.078809 | 10.5  |
| 600448 | 2015 | 1.235 | 0.05 | 0.305382 | 0.09325802 | 21.61094 | 0.014956 | 15.31 |
| 600960 | 2015 | -0.35 | 0.05 | 0.305382 | 0.09325802 | 21.82272 | 0.007304 | 32.95 |
| 601678 | 2015 | -0.27 | 0.05 | 0.305382 | 0.09325802 | 22.62719 | 0.078809 | 10.5  |
| 601678 | 2015 | -0.27 | 0.05 | 0.305382 | 0.09325802 | 22.70704 | 0.078809 | 10.5  |
| 600960 | 2015 | -0.24 | 0.05 | 0.305382 | 0.09325802 | 21.78261 | 0.007304 | 32.95 |
| 639    | 2015 | -0.29 | 0.05 | 0.305382 | 0.09325802 | 20.69376 | 0.107567 | 42.13 |
| 600960 | 2015 | -0.35 | 0.05 | 0.305382 | 0.09325802 | 21.82272 | 0.007304 | 32.95 |
| 601678 | 2015 | -0.27 | 0.05 | 0.305382 | 0.09325802 | 22.70704 | 0.078809 | 10.5  |
| 601678 | 2015 | -0.27 | 0.05 | 0.305382 | 0.09325802 | 22.70704 | 0.078809 | 10.5  |
| 600448 | 2015 | 1.235 | 0.05 | 0.305382 | 0.09325802 | 21.61094 | 0.014956 | 15.31 |
| 639    | 2015 | -0.29 | 0.05 | 0.305382 | 0.09325802 | 21.27857 | 0.107567 | 42.13 |
| 601678 | 2015 | -0.27 | 0.05 | 0.305382 | 0.09325802 | 22.70704 | 0.078809 | 10.5  |
| 601678 | 2015 | -0.27 | 0.05 | 0.305382 | 0.09325802 | 22.70704 | 0.078809 | 10.5  |
| 600448 | 2015 | 1.235 | 0.05 | 0.305382 | 0.09325802 | 21.5916  | 0.014956 | 15.31 |
| 600960 | 2015 | -0.21 | 0.05 | 0.305382 | 0.09325802 | 21.82272 | 0.007304 | 32.95 |
| 601678 | 2015 | -0.27 | 0.05 | 0.305382 | 0.09325802 | 22.70704 | 0.078809 | 10.5  |
| 600960 | 2015 | -0.21 | 0.05 | 0.305382 | 0.09325802 | 21.82272 | 0.007304 | 32.95 |
| 600448 | 2015 | 1.235 | 0.05 | 0.305382 | 0.09325802 | 21.61094 | 0.014956 | 15.31 |
| 895    | 2015 | -0.43 | 0.07 | 0.254736 | 0.06489044 | 23.85372 | 0.249707 | 60.24 |
| 895    | 2015 | -0.95 | 0.07 | 0.254736 | 0.06489044 | 23.85372 | 0.249707 | 60.24 |
| 895    | 2015 | -0.82 | 0.07 | 0.254736 | 0.06489044 | 23.85372 | 0.249707 | 60.24 |
| 895    | 2015 | -0.82 | 0.07 | 0.254736 | 0.06489044 | 23.61334 | 0.249707 | 60.24 |
| 895    | 2015 | -0.95 | 0.07 | 0.254736 | 0.06489044 | 23.85372 | 0.249707 | 60.24 |
| 895    | 2015 | -0.82 | 0.07 | 0.254736 | 0.06489044 | 23.85372 | 0.249707 | 60.24 |
| 895    | 2015 | -0.56 | 0.07 | 0.254736 | 0.06489044 | 23.85372 | 0.249707 | 60.24 |
| 895    | 2015 | -0.95 | 0.07 | 0.254736 | 0.06489044 | 23.85372 | 0.249707 | 60.24 |
| 895    | 2015 | -0.82 | 0.07 | 0.254736 | 0.06489044 | 23.85372 | 0.249707 | 60.24 |
| 895    | 2015 | -0.89 | 0.07 | 0.254736 | 0.06489044 | 23.85372 | 0.249707 | 60.24 |
| 600436 | 2015 | 0.231 | 0.11 | 0.092976 | 0.00864447 | 22.1232  | 0.140265 | 57.92 |
| 600592 | 2015 | -0.34 | 0.11 | 0.092976 | 0.00864447 | 21.75425 | 0.015995 | 37.85 |
| 600592 | 2015 | -0.34 | 0.11 | 0.092976 | 0.00864447 | 21.75425 | 0.015995 | 37.85 |
| 600436 | 2015 | -0.5  | 0.11 | 0.092976 | 0.00864447 | 22.1232  | 0.140265 | 57.92 |
| 600592 | 2015 | 0.1   | 0.11 | 0.092976 | 0.00864447 | 21.75425 | 0.015995 | 37.85 |
| 600436 | 2015 | -0.07 | 0.11 | 0.092976 | 0.00864447 | 22.1232  | 0.140265 | 57.92 |
| 600436 | 2015 | 0.132 | 0.11 | 0.092976 | 0.00864447 | 22.1232  | 0.140265 | 57.92 |
| 600592 | 2015 | 0.049 | 0.11 | 0.092976 | 0.00864447 | 21.75425 | 0.015995 | 37.85 |
| 600436 | 2015 | 0.231 | 0.11 | 0.092976 | 0.00864447 | 22.1232  | 0.140265 | 57.92 |
| 600436 | 2015 | 0.231 | 0.11 | 0.092976 | 0.00864447 | 22.1232  | 0.140265 | 57.92 |
| 600436 | 2015 | 0.231 | 0.11 | 0.092976 | 0.00864447 | 22.1232  | 0.140265 | 57.92 |
| 600592 | 2015 | 0.1   | 0.11 | 0.092976 | 0.00864447 | 21.69346 | 0.015995 | 37.85 |
| 600436 | 2015 | -0.71 | 0.11 | 0.092976 | 0.00864447 | 21.98536 | 0.140265 | 57.92 |
| 600592 | 2015 | 0.1   | 0.11 | 0.092976 | 0.00864447 | 21.75425 | 0.015995 | 37.85 |
| 600592 | 2015 | 0.1   | 0.11 | 0.092976 | 0.00864447 | 21.75425 | 0.015995 | 37.85 |
| 2365   | 2015 | 0.901 | 0.12 | 1.106815 | 1.2250399  | 20.90808 | 0.015349 | 22.63 |
| 600568 | 2015 | -0.55 | 0.12 | 1.106815 | 1.2250399  | 21.6379  | 0.02709  | 34.13 |
| 2365   | 2015 | 0.901 | 0.12 | 1.106815 | 1.2250399  | 20.90808 | 0.015349 | 22.63 |
| 2365   | 2015 | 0.901 | 0.12 | 1.106815 | 1.23E+00   | 20.93386 | 0.015349 | 22.63 |
| 600568 | 2015 | -0.55 | 0.12 | 1.106815 | 1.23E+00   | 22.18002 | 0.02709  | 34.13 |
| 600568 | 2015 | -0.55 | 0.12 | 1.106815 | 1.23E+00   | 22.18002 | 0.02709  | 34.13 |

|        |      |       |      |          |            |          |          |       |
|--------|------|-------|------|----------|------------|----------|----------|-------|
| 600568 | 2015 | -0.55 | 0.12 | 1.106815 | 1.23E+00   | 22.18002 | 0.02709  | 34.13 |
| 2365   | 2015 | 0.901 | 0.12 | 1.106815 | 1.23E+00   | 20.90808 | 0.015349 | 22.63 |
| 600568 | 2015 | -0.55 | 0.12 | 1.106815 | 1.23E+00   | 22.18002 | 0.02709  | 34.13 |
| 2365   | 2015 | 0.901 | 0.12 | 1.106815 | 1.23E+00   | 20.90808 | 0.015349 | 22.63 |
| 600568 | 2015 | -0.55 | 0.12 | 1.106815 | 1.23E+00   | 22.18002 | 0.02709  | 34.13 |
| 300089 | 2015 | -0.73 | 0.09 | 0.693147 | 4.80E-01   | 20.89651 | 0.015502 | 38.25 |
| 300408 | 2015 | 0.267 | 0.09 | 0.693147 | 4.80E-01   | 22.33161 | 0.203281 | 37.35 |
| 300408 | 2015 | 0.006 | 0.09 | 0.693147 | 4.80E-01   | 22.30502 | 0.203281 | 37.35 |
| 300408 | 2015 | 0.267 | 0.09 | 0.693147 | 4.80E-01   | 22.33161 | 0.203281 | 37.35 |
| 300408 | 2015 | 0.006 | 0.09 | 0.693147 | 4.80E-01   | 22.33161 | 0.203281 | 37.35 |
| 300089 | 2015 | -0.73 | 0.09 | 0.693147 | 4.80E-01   | 20.99323 | 0.015502 | 38.25 |
| 300089 | 2015 | -0.73 | 0.09 | 0.693147 | 4.80E-01   | 20.89651 | 0.015502 | 38.25 |
| 300408 | 2015 | 0.028 | 0.09 | 0.693147 | 4.80E-01   | 22.33161 | 0.203281 | 37.35 |
| 300089 | 2015 | -0.73 | 0.09 | 0.693147 | 4.80E-01   | 20.89651 | 0.015502 | 38.25 |
| 300089 | 2015 | -0.73 | 0.09 | 0.693147 | 4.80E-01   | 20.89651 | 0.015502 | 38.25 |
| 2225   | 2015 | -0.33 | 0.07 | 0.209796 | 4.40E-02   | 22.36321 | 0.033711 | 16.12 |
| 2225   | 2015 | -0.44 | 0.07 | 0.209796 | 4.40E-02   | 22.36321 | 0.033711 | 16.12 |
| 2225   | 2015 | -0.55 | 0.07 | 0.209796 | 4.40E-02   | 22.36321 | 0.033711 | 16.12 |
| 2225   | 2015 | -0.37 | 0.07 | 0.209796 | 4.40E-02   | 22.36321 | 0.033711 | 16.12 |
| 2225   | 2015 | -0.44 | 0.07 | 0.209796 | 0.04401456 | 22.36321 | 0.033711 | 16.12 |
| 2225   | 2015 | -0.44 | 0.07 | 0.209796 | 0.04401456 | 22.11922 | 0.033711 | 16.12 |
| 2225   | 2015 | -0.22 | 0.07 | 0.209796 | 0.04401456 | 22.36321 | 0.033711 | 16.12 |
| 2225   | 2015 | -0.44 | 0.07 | 0.209796 | 0.04401456 | 22.36321 | 0.033711 | 16.12 |
| 2225   | 2015 | -0.44 | 0.07 | 0.209796 | 0.04401456 | 22.36321 | 0.033711 | 16.12 |
| 2225   | 2015 | 0.112 | 0.07 | 0.209796 | 0.04401456 | 22.36321 | 0.033711 | 16.12 |
| 2225   | 2015 | -0.22 | 0.07 | 0.209796 | 0.04401456 | 22.36321 | 0.033711 | 16.12 |
| 300105 | 2015 | 0.346 | 0.05 | 1.072813 | 1.150927   | 21.75041 | -0.02427 | 23.25 |
| 300105 | 2015 | 0.346 | 0.05 | 1.072813 | 1.150927   | 21.74392 | -0.02427 | 23.25 |
| 811    | 2015 | 0.148 | 0.05 | 1.072813 | 1.150927   | 21.7911  | 0.157534 | 29.15 |
| 2675   | 2015 | 0.609 | 0.05 | 1.072813 | 1.150927   | 21.65854 | 0.049884 | 20.86 |
| 2254   | 2015 | -0.05 | 0.05 | 1.072813 | 1.150927   | 21.66238 | 0.051783 | 36.32 |
| 2643   | 2015 | 0.779 | 0.05 | 1.072813 | 1.150927   | 21.82813 | 0.099227 | 21.98 |
| 2254   | 2015 | -0.05 | 0.05 | 1.072813 | 1.150927   | 21.66238 | 0.051783 | 36.32 |
| 600219 | 2015 | 0.236 | 0.05 | 1.072813 | 1.150927   | 24.27257 | 0.02629  | 29.81 |
| 2353   | 2015 | -0.03 | 0.05 | 1.072813 | 1.150927   | 23.06439 | 0.018021 | 22.36 |
| 300105 | 2015 | -0.08 | 0.05 | 1.072813 | 1.150927   | 21.74392 | -0.02427 | 23.25 |
| 300308 | 2015 | 0.13  | 0.05 | 1.072813 | 1.150927   | 20.27903 | 0.010204 | 46.01 |
| 600309 | 2015 | 0.323 | 0.05 | 1.072813 | 1.150927   | 24.59038 | 0.153783 | 50.5  |
| 2643   | 2015 | 0.522 | 0.05 | 1.072813 | 1.150927   | 21.82813 | 0.099227 | 21.98 |
| 2237   | 2015 | 0.122 | 0.05 | 1.072813 | 1.150927   | 23.19039 | 0.044394 | 35.87 |
| 2675   | 2015 | 0.609 | 0.05 | 1.072813 | 1.150927   | 21.65854 | 0.049884 | 20.86 |
| 600309 | 2015 | 0.586 | 0.05 | 1.072813 | 1.150927   | 24.59038 | 0.153783 | 50.5  |
| 300224 | 2015 | -0.42 | 0.05 | 1.072813 | 1.150927   | 21.80105 | 0.076356 | 53.3  |
| 2353   | 2015 | 0.25  | 0.05 | 1.072813 | 1.150927   | 23.06439 | 0.018021 | 22.36 |
| 2254   | 2015 | -0.05 | 0.05 | 1.072813 | 1.150927   | 21.66238 | 0.051783 | 36.32 |
| 811    | 2015 | -0.29 | 0.05 | 1.072813 | 1.150927   | 21.7911  | 0.157534 | 29.15 |
| 600309 | 2015 | 0.323 | 0.05 | 1.072813 | 1.150927   | 24.59038 | 0.153783 | 50.5  |
| 2254   | 2015 | -0.55 | 0.05 | 1.072813 | 1.150927   | 21.66238 | 0.051783 | 36.32 |
| 300224 | 2015 | -0.42 | 0.05 | 1.072813 | 1.150927   | 21.80105 | 0.076356 | 53.3  |
| 2353   | 2015 | -0.12 | 0.05 | 1.072813 | 1.150927   | 23.06439 | 0.018021 | 22.36 |
| 2355   | 2015 | -0.24 | 0.05 | 1.072813 | 1.150927   | 21.89954 | 0.016042 | 33.84 |
| 682    | 2015 | 0.385 | 0.05 | 1.072813 | 1.150927   | 21.90757 | 0.059813 | 19.74 |
| 2254   | 2015 | -0.08 | 0.05 | 1.072813 | 1.150927   | 21.66238 | 0.051783 | 36.32 |
| 300224 | 2015 | -0.42 | 0.05 | 1.072813 | 1.150927   | 21.80105 | 0.076356 | 53.3  |

|        |      |       |      |          |          |          |          |       |
|--------|------|-------|------|----------|----------|----------|----------|-------|
| 2353   | 2015 | -0.12 | 0.05 | 1.072813 | 1.150927 | 23.06439 | 0.018021 | 22.36 |
| 2237   | 2015 | 0.134 | 0.05 | 1.072813 | 1.150927 | 23.16718 | 0.044394 | 35.87 |
| 300224 | 2015 | -0.22 | 0.05 | 1.072813 | 1.150927 | 21.80105 | 0.076356 | 53.3  |
| 811    | 2015 | 0.148 | 0.05 | 1.072813 | 1.150927 | 21.7911  | 0.157534 | 29.15 |
| 2643   | 2015 | 0.608 | 0.05 | 1.072813 | 1.150927 | 21.82813 | 0.099227 | 21.98 |
| 2675   | 2015 | 0.609 | 0.05 | 1.072813 | 1.150927 | 21.51058 | 0.049884 | 20.86 |
| 2355   | 2015 | -0.24 | 0.05 | 1.072813 | 1.150927 | 21.89954 | 0.016042 | 33.84 |
| 682    | 2015 | 0.269 | 0.05 | 1.072813 | 1.150927 | 21.4112  | 0.059813 | 19.74 |
| 600219 | 2015 | 0.236 | 0.05 | 1.072813 | 1.150927 | 24.27257 | 0.02629  | 29.81 |
| 600309 | 2015 | 0.311 | 0.05 | 1.072813 | 1.150927 | 24.59038 | 0.153783 | 50.5  |
| 300105 | 2015 | 0.224 | 0.05 | 1.072813 | 1.150927 | 21.74392 | -0.02427 | 23.25 |
| 2254   | 2015 | 0.087 | 0.05 | 1.072813 | 1.150927 | 21.66238 | 0.051783 | 36.32 |
| 682    | 2015 | 0.269 | 0.05 | 1.072813 | 1.150927 | 21.90757 | 0.059813 | 19.74 |
| 2353   | 2015 | 0.195 | 0.05 | 1.072813 | 1.150927 | 23.06439 | 0.018021 | 22.36 |
| 2363   | 2015 | -0.7  | 0.05 | 1.072813 | 1.150927 | 21.50568 | 0.037141 | 45.25 |
| 682    | 2015 | 0.269 | 0.05 | 1.072813 | 1.150927 | 21.90757 | 0.059813 | 19.74 |
| 600219 | 2015 | 0.206 | 0.05 | 1.072813 | 1.150927 | 24.27257 | 0.02629  | 29.81 |
| 2237   | 2015 | 0.122 | 0.05 | 1.072813 | 1.150927 | 23.19039 | 0.044394 | 35.87 |
| 2374   | 2015 | -0.62 | 0.05 | 1.072813 | 1.150927 | 22.05755 | 0.061349 | 16.14 |
| 2643   | 2015 | 0.608 | 0.05 | 1.072813 | 1.150927 | 21.82813 | 0.099227 | 21.98 |
| 600309 | 2015 | 0.036 | 0.05 | 1.072813 | 1.150927 | 24.24767 | 0.153783 | 50.5  |
| 600309 | 2015 | 0.323 | 0.05 | 1.072813 | 1.150927 | 24.59038 | 0.153783 | 50.5  |
| 682    | 2015 | 0.451 | 0.05 | 1.072813 | 1.150927 | 21.90757 | 0.059813 | 19.74 |
| 811    | 2015 | 0.148 | 0.05 | 1.072813 | 1.150927 | 21.7911  | 0.157534 | 29.15 |
| 600219 | 2015 | -0.02 | 0.05 | 1.072813 | 1.150927 | 24.27257 | 0.02629  | 29.81 |
| 600309 | 2015 | 0.32  | 0.05 | 1.072813 | 1.150927 | 24.59038 | 0.153783 | 50.5  |
| 2353   | 2015 | 0.09  | 0.05 | 1.072813 | 1.150927 | 23.06439 | 0.018021 | 22.36 |
| 2355   | 2015 | -0.24 | 0.05 | 1.072813 | 1.150927 | 21.89954 | 0.016042 | 33.84 |
| 811    | 2015 | -0.51 | 0.05 | 1.072813 | 1.150927 | 21.7911  | 0.157534 | 29.15 |
| 682    | 2015 | 0.594 | 0.05 | 1.072813 | 1.150927 | 21.90757 | 0.059813 | 19.74 |
| 2353   | 2015 | 0.046 | 0.05 | 1.072813 | 1.150927 | 23.06439 | 0.018021 | 22.36 |
| 2254   | 2015 | 0.087 | 0.05 | 1.072813 | 1.150927 | 21.66238 | 0.051783 | 36.32 |
| 811    | 2015 | -0.32 | 0.05 | 1.072813 | 1.150927 | 21.7911  | 0.157534 | 29.15 |
| 2355   | 2015 | -0.24 | 0.05 | 1.072813 | 1.150927 | 21.86406 | 0.016042 | 33.84 |
| 600219 | 2015 | 0.231 | 0.05 | 1.072813 | 1.150927 | 24.27257 | 0.02629  | 29.81 |
| 2374   | 2015 | -0.78 | 0.05 | 1.072813 | 1.150927 | 22.05755 | 0.061349 | 16.14 |
| 2675   | 2015 | 0.609 | 0.05 | 1.072813 | 1.150927 | 21.65854 | 0.049884 | 20.86 |
| 682    | 2015 | 0.269 | 0.05 | 1.072813 | 1.150927 | 21.90757 | 0.059813 | 19.74 |
| 300224 | 2015 | -0.2  | 0.05 | 1.072813 | 1.150927 | 21.80105 | 0.076356 | 53.3  |
| 811    | 2015 | -0.33 | 0.05 | 1.072813 | 1.150927 | 22.20864 | 0.157534 | 29.15 |
| 600309 | 2015 | 0.036 | 0.05 | 1.072813 | 1.150927 | 24.59038 | 0.153783 | 50.5  |
| 600219 | 2015 | -0.02 | 0.05 | 1.072813 | 1.150927 | 24.04702 | 0.02629  | 29.81 |
| 2353   | 2015 | -0.12 | 0.05 | 1.072813 | 1.150927 | 23.06439 | 0.018021 | 22.36 |
| 682    | 2015 | 0.618 | 0.05 | 1.072813 | 1.150927 | 21.90757 | 0.059813 | 19.74 |
| 2254   | 2015 | -0.05 | 0.05 | 1.072813 | 1.150927 | 21.66238 | 0.051783 | 36.32 |
| 600309 | 2015 | 0.38  | 0.05 | 1.072813 | 1.150927 | 24.59038 | 0.153783 | 50.5  |
| 2643   | 2015 | 0.287 | 0.05 | 1.072813 | 1.150927 | 21.82813 | 0.099227 | 21.98 |
| 2353   | 2015 | -0.12 | 0.05 | 1.072813 | 1.150927 | 23.06439 | 0.018021 | 22.36 |
| 811    | 2015 | 0.148 | 0.05 | 1.072813 | 1.150927 | 21.7911  | 0.157534 | 29.15 |
| 300105 | 2015 | -0.08 | 0.05 | 1.072813 | 1.150927 | 21.74392 | -0.02427 | 23.25 |
| 682    | 2015 | 0.594 | 0.05 | 1.072813 | 1.150927 | 21.90757 | 0.059813 | 19.74 |
| 2643   | 2015 | 0.608 | 0.05 | 1.072813 | 1.150927 | 21.82813 | 0.099227 | 21.98 |
| 2675   | 2015 | 0.609 | 0.05 | 1.072813 | 1.150927 | 21.65854 | 0.049884 | 20.86 |
| 2374   | 2015 | -0.62 | 0.05 | 1.072813 | 1.150927 | 22.05755 | 0.061349 | 16.14 |

|        |      |       |      |          |            |          |          |       |
|--------|------|-------|------|----------|------------|----------|----------|-------|
| 2353   | 2015 | 0.152 | 0.05 | 1.072813 | 1.150927   | 23.06439 | 0.018021 | 22.36 |
| 2254   | 2015 | -0.05 | 0.05 | 1.072813 | 1.150927   | 21.66238 | 0.051783 | 36.32 |
| 2353   | 2015 | 0.062 | 0.05 | 1.072813 | 1.150927   | 23.06439 | 0.018021 | 22.36 |
| 2353   | 2015 | -0.12 | 0.05 | 1.072813 | 1.150927   | 23.06439 | 0.018021 | 22.36 |
| 2254   | 2015 | -0.55 | 0.05 | 1.072813 | 1.150927   | 21.58914 | 0.051783 | 36.32 |
| 300308 | 2015 | 0.13  | 0.05 | 1.072813 | 1.150927   | 20.27903 | 0.010204 | 46.01 |
| 600219 | 2015 | 0.664 | 0.05 | 1.072813 | 1.150927   | 24.27257 | 0.02629  | 29.81 |
| 2353   | 2015 | 0.226 | 0.05 | 1.072813 | 1.150927   | 22.73364 | 0.018021 | 22.36 |
| 2237   | 2015 | 0.194 | 0.05 | 1.072813 | 1.150927   | 23.19039 | 0.044394 | 35.87 |
| 811    | 2015 | -0.42 | 0.05 | 1.072813 | 1.150927   | 21.7911  | 0.157534 | 29.15 |
| 2643   | 2015 | 0.304 | 0.05 | 1.072813 | 1.150927   | 21.82813 | 0.099227 | 21.98 |
| 600309 | 2015 | 0.323 | 0.05 | 1.072813 | 1.150927   | 24.59038 | 0.153783 | 50.5  |
| 2363   | 2015 | -0.7  | 0.05 | 1.072813 | 1.150927   | 21.45806 | 0.037141 | 45.25 |
| 682    | 2015 | 0.269 | 0.05 | 1.072813 | 1.150927   | 21.90757 | 0.059813 | 19.74 |
| 2675   | 2015 | 0.609 | 0.05 | 1.072813 | 1.150927   | 21.65854 | 0.049884 | 20.86 |
| 2363   | 2015 | -0.7  | 0.05 | 1.072813 | 1.150927   | 21.50568 | 0.037141 | 45.25 |
| 300105 | 2015 | -0.08 | 0.05 | 1.072813 | 1.150927   | 21.74392 | -0.02427 | 23.25 |
| 2643   | 2015 | 0.608 | 0.05 | 1.072813 | 1.150927   | 21.79926 | 0.099227 | 21.98 |
| 811    | 2015 | -0.29 | 0.05 | 1.072813 | 1.150927   | 21.7911  | 0.157534 | 29.15 |
| 2643   | 2015 | 0.396 | 0.05 | 1.072813 | 1.150927   | 21.82813 | 0.099227 | 21.98 |
| 682    | 2015 | 0.269 | 0.05 | 1.072813 | 1.150927   | 21.90757 | 0.059813 | 19.74 |
| 300308 | 2015 | 0.13  | 0.05 | 1.072813 | 1.150927   | 20.27903 | 0.010204 | 46.01 |
| 2374   | 2015 | -0.68 | 0.05 | 1.072813 | 1.150927   | 22.05755 | 0.061349 | 16.14 |
| 2374   | 2015 | -0.78 | 0.05 | 1.072813 | 1.150927   | 22.05755 | 0.061349 | 16.14 |
| 2374   | 2015 | -0.78 | 0.05 | 1.072813 | 1.150927   | 21.74332 | 0.061349 | 16.14 |
| 2237   | 2015 | 0.194 | 0.05 | 1.072813 | 1.150927   | 23.19039 | 0.044394 | 35.87 |
| 300224 | 2015 | -0.21 | 0.05 | 1.072813 | 1.150927   | 21.6393  | 0.076356 | 53.3  |
| 2355   | 2015 | -0.24 | 0.05 | 1.072813 | 1.150927   | 21.89954 | 0.016042 | 33.84 |
| 2407   | 2015 | 0.016 | 0.07 | 0.693147 | 0.48045301 | 22.0649  | 0.013445 | 13.97 |
| 2407   | 2015 | 0.016 | 0.07 | 0.693147 | 0.48045301 | 21.91152 | 0.013445 | 13.97 |
| 600531 | 2015 | -0.62 | 0.07 | 0.693147 | 0.48045301 | 22.73304 | 0.008818 | 42.6  |
| 300109 | 2015 | 0.769 | 0.07 | 0.693147 | 0.48045301 | 20.93513 | 0.049005 | 19.58 |
| 2448   | 2015 | -0.09 | 0.07 | 0.693147 | 0.48045301 | 21.67702 | 0.093858 | 18.34 |
| 2448   | 2015 | -0.11 | 0.07 | 0.693147 | 0.48045301 | 21.6611  | 0.093858 | 18.34 |
| 2407   | 2015 | -0.37 | 0.07 | 0.693147 | 0.48045301 | 22.0649  | 0.013445 | 13.97 |
| 2601   | 2015 | -0.3  | 0.07 | 0.693147 | 0.48045301 | 22.47438 | 0.05045  | 13.66 |
| 600469 | 2015 | -0.34 | 0.07 | 0.693147 | 0.48045301 | 22.65044 | 0.08327  | 42.58 |
| 600531 | 2015 | -0.67 | 0.07 | 0.693147 | 0.48045301 | 22.72945 | 0.008818 | 42.6  |
| 300109 | 2015 | 0.235 | 0.07 | 0.693147 | 0.48045301 | 20.93513 | 0.049005 | 19.58 |
| 2448   | 2015 | -0.17 | 0.07 | 0.693147 | 0.48045301 | 21.67702 | 0.093858 | 18.34 |
| 600531 | 2015 | -0.71 | 0.07 | 0.693147 | 0.48045301 | 22.72945 | 0.008818 | 42.6  |
| 600469 | 2015 | -0.34 | 0.07 | 0.693147 | 0.48045301 | 22.65044 | 0.08327  | 42.58 |
| 300109 | 2015 | -0.19 | 0.07 | 0.693147 | 0.48045301 | 20.93513 | 0.049005 | 19.58 |
| 2407   | 2015 | 0.016 | 0.07 | 0.693147 | 0.48045301 | 22.0649  | 0.013445 | 13.97 |
| 2423   | 2015 | -0.11 | 0.07 | 0.693147 | 0.48045301 | 21.89297 | -0.11702 | 67.42 |
| 600531 | 2015 | -0.76 | 0.07 | 0.693147 | 0.48045301 | 22.72945 | 0.008818 | 42.6  |
| 2407   | 2015 | -0.59 | 0.07 | 0.693147 | 0.48045301 | 22.0649  | 0.013445 | 13.97 |
| 2448   | 2015 | -0.03 | 0.07 | 0.693147 | 0.48045301 | 21.67702 | 0.093858 | 18.34 |
| 600531 | 2015 | -0.46 | 0.07 | 0.693147 | 0.48045301 | 22.72945 | 0.008818 | 42.6  |
| 600469 | 2015 | -0.34 | 0.07 | 0.693147 | 0.48045301 | 22.65044 | 0.08327  | 42.58 |
| 612    | 2015 | -0.97 | 0.07 | 0.693147 | 0.48045301 | 23.05251 | -0.01312 | 17.56 |
| 612    | 2015 | -0.97 | 0.07 | 0.693147 | 0.48045301 | 22.87832 | -0.01312 | 17.56 |
| 2407   | 2015 | 0.016 | 0.07 | 0.693147 | 0.48045301 | 22.0649  | 0.013445 | 13.97 |
| 2448   | 2015 | 0.763 | 0.07 | 0.693147 | 0.48045301 | 21.67702 | 0.093858 | 18.34 |



|        |      |       |      |          |            |          |          |       |
|--------|------|-------|------|----------|------------|----------|----------|-------|
| 300109 | 2015 | 0.921 | 0.07 | 0.693147 | 0.48045301 | 20.93513 | 0.049005 | 19.58 |
| 2407   | 2015 | -0.69 | 0.07 | 0.693147 | 0.48045301 | 22.0649  | 0.013445 | 13.97 |
| 612    | 2015 | -0.97 | 0.07 | 0.693147 | 0.48045301 | 22.87832 | -0.01312 | 17.56 |
| 2407   | 2015 | -0.69 | 0.07 | 0.693147 | 0.48045301 | 22.0649  | 0.013445 | 13.97 |
| 612    | 2015 | -0.97 | 0.07 | 0.693147 | 0.48045301 | 22.87832 | -0.01312 | 17.56 |
| 2423   | 2015 | -0.49 | 0.07 | 0.693147 | 0.48045301 | 21.89297 | -0.11702 | 67.42 |
| 600531 | 2015 | -0.46 | 0.07 | 0.693147 | 0.48045301 | 22.72945 | 0.008818 | 42.6  |
| 2448   | 2015 | -0.39 | 0.07 | 0.693147 | 0.48045301 | 21.67702 | 0.093858 | 18.34 |
| 2423   | 2015 | -0.49 | 0.07 | 0.693147 | 0.48045301 | 21.89297 | -0.11702 | 67.42 |
| 2423   | 2015 | -0.08 | 0.07 | 0.693147 | 0.48045301 | 21.97141 | -0.11702 | 67.42 |
| 300109 | 2015 | 0.235 | 0.07 | 0.693147 | 0.48045301 | 20.93513 | 0.049005 | 19.58 |
| 300109 | 2015 | -0.28 | 0.07 | 0.693147 | 0.48045301 | 20.93513 | 0.049005 | 19.58 |
| 2423   | 2015 | -0.49 | 0.07 | 0.693147 | 0.48045301 | 21.89297 | -0.11702 | 67.42 |
| 2407   | 2015 | -0.3  | 0.07 | 0.693147 | 0.48045301 | 22.0649  | 0.013445 | 13.97 |
| 2601   | 2015 | -0.28 | 0.07 | 0.693147 | 0.48045301 | 22.39573 | 0.05045  | 13.66 |
| 2601   | 2015 | -0.28 | 0.07 | 0.693147 | 0.48045301 | 22.47438 | 0.05045  | 13.66 |
| 2601   | 2015 | -0.02 | 0.07 | 0.693147 | 0.48045301 | 22.47438 | 0.05045  | 13.66 |
| 300109 | 2015 | 0.921 | 0.07 | 0.693147 | 0.48045301 | 20.93513 | 0.049005 | 19.58 |
| 2423   | 2015 | -0.08 | 0.07 | 0.693147 | 0.48045301 | 21.89297 | -0.11702 | 67.42 |
| 612    | 2015 | -0.97 | 0.07 | 0.693147 | 0.48045301 | 22.87832 | -0.01312 | 17.56 |
| 2448   | 2015 | -0.39 | 0.07 | 0.693147 | 0.48045301 | 21.67702 | 0.093858 | 18.34 |
| 2423   | 2015 | -0.49 | 0.07 | 0.693147 | 0.48045301 | 21.89297 | -0.11702 | 67.42 |
| 300109 | 2015 | 0.221 | 0.07 | 0.693147 | 0.48045301 | 20.89004 | 0.049005 | 19.58 |
| 2448   | 2015 | 0.763 | 0.07 | 0.693147 | 0.48045301 | 21.67702 | 0.093858 | 18.34 |
| 600182 | 2015 | -0.92 | 0.08 | 1.797106 | 3.2295905  | 21.77455 | 0.214394 | 44.43 |
| 600182 | 2015 | -0.92 | 0.08 | 1.797106 | 3.2295905  | 20.49963 | 0.214394 | 44.43 |
| 600356 | 2015 | -0.27 | 0.08 | 1.797106 | 3.2295905  | 21.69569 | 0.044788 | 31.6  |
| 600356 | 2015 | -0.27 | 0.08 | 1.797106 | 3.2295905  | 21.70114 | 0.044788 | 31.6  |
| 600182 | 2015 | -0.92 | 0.08 | 1.797106 | 3.2295905  | 21.77455 | 0.214394 | 44.43 |
| 600356 | 2015 | -0.27 | 0.08 | 1.797106 | 3.2295905  | 21.70114 | 0.044788 | 31.6  |
| 300146 | 2015 | 0.637 | 0.09 | 1.439111 | 2.0710389  | 22.3136  | 0.136223 | 48.81 |
| 2141   | 2015 | -0.2  | 0.09 | 1.439111 | 2.0710389  | 20.15373 | 0.01969  | 25    |
| 2180   | 2015 | 0.66  | 0.09 | 1.439111 | 2.0710389  | 22.16159 | 0.151444 | 68.74 |
| 513    | 2015 | -0.36 | 0.09 | 1.439111 | 2.0710389  | 22.46072 | 0.137126 | 36.68 |
| 300053 | 2015 | 0.347 | 0.09 | 1.439111 | 2.0710389  | 20.93948 | 0.046776 | 20.72 |
| 300053 | 2015 | 0.588 | 0.09 | 1.439111 | 2.0710389  | 21.1275  | 0.046776 | 20.72 |
| 300146 | 2015 | -0.31 | 0.09 | 1.439111 | 2.0710389  | 22.28134 | 0.136223 | 48.81 |
| 300246 | 2015 | -0.11 | 0.09 | 1.439111 | 2.0710389  | 20.17965 | 0.063558 | 33.53 |
| 2180   | 2015 | -0.13 | 0.09 | 1.439111 | 2.0710389  | 22.16159 | 0.151444 | 68.74 |
| 300246 | 2015 | -0.11 | 0.09 | 1.439111 | 2.0710389  | 20.17965 | 0.063558 | 33.53 |
| 2180   | 2015 | -0.12 | 0.09 | 1.439111 | 2.0710389  | 21.86086 | 0.151444 | 68.74 |
| 2141   | 2015 | -0.49 | 0.09 | 1.439111 | 2.0710389  | 20.15373 | 0.01969  | 25    |
| 532    | 2015 | -0.39 | 0.09 | 1.439111 | 2.0710389  | 20.92517 | 0.070106 | 14.79 |
| 300146 | 2015 | -0.32 | 0.09 | 1.439111 | 2.0710389  | 22.3136  | 0.136223 | 48.81 |
| 513    | 2015 | -0.36 | 0.09 | 1.439111 | 2.0710389  | 22.46072 | 0.137126 | 36.68 |
| 513    | 2015 | -0.08 | 0.09 | 1.439111 | 2.0710389  | 22.46072 | 0.137126 | 36.68 |
| 300381 | 2015 | 0.798 | 0.09 | 1.439111 | 2.0710389  | 21.62028 | 0.056702 | 40.74 |
| 2141   | 2015 | -0.49 | 0.09 | 1.439111 | 2.0710389  | 20.15373 | 0.01969  | 25    |
| 300246 | 2015 | -0.11 | 0.09 | 1.439111 | 2.0710389  | 20.17965 | 0.063558 | 33.53 |
| 300146 | 2015 | 0.637 | 0.09 | 1.439111 | 2.0710389  | 22.3136  | 0.136223 | 48.81 |
| 513    | 2015 | 0.032 | 0.09 | 1.439111 | 2.0710389  | 22.46072 | 0.137126 | 36.68 |
| 300246 | 2015 | -0.11 | 0.09 | 1.439111 | 2.0710389  | 20.10336 | 0.063558 | 33.53 |
| 532    | 2015 | -0.67 | 0.09 | 1.439111 | 2.0710389  | 20.62834 | 0.070106 | 14.79 |
| 300273 | 2015 | 0.505 | 0.09 | 1.439111 | 2.0710389  | 22.03963 | 0.044729 | 20.01 |

|        |      |       |      |          |           |          |          |       |
|--------|------|-------|------|----------|-----------|----------|----------|-------|
| 300273 | 2015 | -0.48 | 0.09 | 1.439111 | 2.0710389 | 22.03963 | 0.044729 | 20.01 |
| 2180   | 2015 | -0.18 | 0.09 | 1.439111 | 2.0710389 | 22.16159 | 0.151444 | 68.74 |
| 513    | 2015 | 0.032 | 0.09 | 1.439111 | 2.0710389 | 22.46072 | 0.137126 | 36.68 |
| 2180   | 2015 | -0.11 | 0.09 | 1.439111 | 2.0710389 | 22.16159 | 0.151444 | 68.74 |
| 532    | 2015 | -0.35 | 0.09 | 1.439111 | 2.0710389 | 20.92517 | 0.070106 | 14.79 |
| 300050 | 2015 | 0.781 | 0.09 | 1.439111 | 2.0710389 | 21.6117  | 0.055324 | 24.13 |
| 513    | 2015 | -0.36 | 0.09 | 1.439111 | 2.0710389 | 22.46072 | 0.137126 | 36.68 |
| 2063   | 2015 | 1.896 | 0.09 | 1.439111 | 2.0710389 | 21.43421 | 0.064064 | 11.61 |
| 300050 | 2015 | 0.413 | 0.09 | 1.439111 | 2.0710389 | 21.6117  | 0.055324 | 24.13 |
| 513    | 2015 | -0.36 | 0.09 | 1.439111 | 2.0710389 | 22.46072 | 0.137126 | 36.68 |
| 300273 | 2015 | -0.03 | 0.09 | 1.439111 | 2.0710389 | 22.03963 | 0.044729 | 20.01 |
| 300381 | 2015 | 0.37  | 0.09 | 1.439111 | 2.0710389 | 21.62028 | 0.056702 | 40.74 |
| 532    | 2015 | -0.39 | 0.09 | 1.439111 | 2.0710389 | 20.92517 | 0.070106 | 14.79 |
| 2017   | 2015 | 0.966 | 0.09 | 1.439111 | 2.0710389 | 21.13575 | 0.085087 | 29.12 |
| 513    | 2015 | -0.36 | 0.09 | 1.439111 | 2.0710389 | 22.81235 | 0.137126 | 36.68 |
| 300053 | 2015 | 0.369 | 0.09 | 1.439111 | 2.0710389 | 20.93948 | 0.046776 | 20.72 |
| 2063   | 2015 | 1.165 | 0.09 | 1.439111 | 2.0710389 | 21.42672 | 0.064064 | 11.61 |
| 532    | 2015 | -0.39 | 0.09 | 1.439111 | 2.0710389 | 20.92517 | 0.070106 | 14.79 |
| 2063   | 2015 | 1.337 | 0.09 | 1.439111 | 2.0710389 | 21.43421 | 0.064064 | 11.61 |
| 300053 | 2015 | 0.347 | 0.09 | 1.439111 | 2.0710389 | 20.93948 | 0.046776 | 20.72 |
| 300050 | 2015 | 0.64  | 0.09 | 1.439111 | 2.0710389 | 21.6117  | 0.055324 | 24.13 |
| 300381 | 2015 | 0.798 | 0.09 | 1.439111 | 2.0710389 | 21.62028 | 0.056702 | 40.74 |
| 2180   | 2015 | -0.34 | 0.09 | 1.439111 | 2.07E+00  | 22.16159 | 0.151444 | 68.74 |
| 300273 | 2015 | 0.186 | 0.09 | 1.439111 | 2.07E+00  | 22.03963 | 0.044729 | 20.01 |
| 532    | 2015 | -0.39 | 0.09 | 1.439111 | 2.07E+00  | 20.92517 | 0.070106 | 14.79 |
| 2063   | 2015 | 1.896 | 0.09 | 1.439111 | 2.07E+00  | 21.43421 | 0.064064 | 11.61 |
| 300246 | 2015 | -0.11 | 0.09 | 1.439111 | 2.07E+00  | 20.17965 | 0.063558 | 33.53 |
| 2141   | 2015 | 0.037 | 0.09 | 1.439111 | 2.07E+00  | 20.15373 | 0.01969  | 25    |
| 300381 | 2015 | 0.126 | 0.09 | 1.439111 | 2.07E+00  | 21.62028 | 0.056702 | 40.74 |
| 300273 | 2015 | 0.505 | 0.09 | 1.439111 | 2.0710389 | 22.03963 | 0.044729 | 20.01 |
| 300053 | 2015 | 0.369 | 0.09 | 1.439111 | 2.0710389 | 20.93948 | 0.046776 | 20.72 |
| 2141   | 2015 | -0.49 | 0.09 | 1.439111 | 2.0710389 | 20.15373 | 0.01969  | 25    |
| 300381 | 2015 | 0.798 | 0.09 | 1.439111 | 2.0710389 | 21.62028 | 0.056702 | 40.74 |
| 300050 | 2015 | 0.732 | 0.09 | 1.439111 | 2.0710389 | 21.6117  | 0.055324 | 24.13 |
| 300381 | 2015 | 0.798 | 0.09 | 1.439111 | 2.0710389 | 21.62028 | 0.056702 | 40.74 |
| 513    | 2015 | -0.2  | 0.09 | 1.439111 | 2.0710389 | 22.46072 | 0.137126 | 36.68 |
| 2141   | 2015 | 0.037 | 0.09 | 1.439111 | 2.0710389 | 20.15373 | 0.01969  | 25    |
| 2141   | 2015 | -0.49 | 0.09 | 1.439111 | 2.0710389 | 20.10336 | 0.01969  | 25    |
| 513    | 2015 | -0.33 | 0.09 | 1.439111 | 2.0710389 | 22.46072 | 0.137126 | 36.68 |
| 2017   | 2015 | 0.966 | 0.09 | 1.439111 | 2.0710389 | 21.15918 | 0.085087 | 29.12 |
| 300381 | 2015 | 0.341 | 0.09 | 1.439111 | 2.0710389 | 21.62028 | 0.056702 | 40.74 |
| 300146 | 2015 | 0.637 | 0.09 | 1.439111 | 2.0710389 | 22.3136  | 0.136223 | 48.81 |
| 2017   | 2015 | 0.966 | 0.09 | 1.439111 | 2.0710389 | 21.15918 | 0.085087 | 29.12 |
| 513    | 2015 | 0.719 | 0.09 | 1.439111 | 2.0710389 | 22.46072 | 0.137126 | 36.68 |
| 2017   | 2015 | 0.966 | 0.09 | 1.439111 | 2.0710389 | 21.15918 | 0.085087 | 29.12 |
| 513    | 2015 | -0.36 | 0.09 | 1.439111 | 2.0710389 | 22.46072 | 0.137126 | 36.68 |
| 300146 | 2015 | -0.69 | 0.09 | 1.439111 | 2.0710389 | 22.3136  | 0.136223 | 48.81 |
| 300381 | 2015 | -0.04 | 0.09 | 1.439111 | 2.0710389 | 21.62028 | 0.056702 | 40.74 |
| 300246 | 2015 | -0.11 | 0.09 | 1.439111 | 2.0710389 | 20.17965 | 0.063558 | 33.53 |
| 513    | 2015 | -0.36 | 0.09 | 1.439111 | 2.0710389 | 22.46072 | 0.137126 | 36.68 |
| 300273 | 2015 | 0.186 | 0.09 | 1.439111 | 2.0710389 | 22.03963 | 0.044729 | 20.01 |
| 513    | 2015 | 0.719 | 0.09 | 1.439111 | 2.0710389 | 22.46072 | 0.137126 | 36.68 |
| 300246 | 2015 | -0.11 | 0.09 | 1.439111 | 2.0710389 | 20.17965 | 0.063558 | 33.53 |
| 300381 | 2015 | 0.798 | 0.09 | 1.439111 | 2.0710389 | 21.62028 | 0.056702 | 40.74 |

|        |      |       |      |          |           |          |          |       |
|--------|------|-------|------|----------|-----------|----------|----------|-------|
| 513    | 2015 | 0.719 | 0.09 | 1.439111 | 2.0710389 | 22.46072 | 0.137126 | 36.68 |
| 2063   | 2015 | 1.176 | 0.09 | 1.439111 | 2.0710389 | 21.43421 | 0.064064 | 11.61 |
| 300273 | 2015 | 0.242 | 0.09 | 1.439111 | 2.0710389 | 21.75989 | 0.044729 | 20.01 |
| 300050 | 2015 | 0.617 | 0.09 | 1.439111 | 2.0710389 | 21.6117  | 0.055324 | 24.13 |
| 300053 | 2015 | 0.588 | 0.09 | 1.439111 | 2.0710389 | 20.93948 | 0.046776 | 20.72 |
| 532    | 2015 | -0.39 | 0.09 | 1.439111 | 2.0710389 | 20.92517 | 0.070106 | 14.79 |
| 300273 | 2015 | 0.186 | 0.09 | 1.439111 | 2.0710389 | 22.03963 | 0.044729 | 20.01 |
| 300146 | 2015 | -0.03 | 0.09 | 1.439111 | 2.0710389 | 22.3136  | 0.136223 | 48.81 |
| 2063   | 2015 | 1.688 | 0.09 | 1.439111 | 2.0710389 | 21.43421 | 0.064064 | 11.61 |
| 300146 | 2015 | 0.637 | 0.09 | 1.439111 | 2.0710389 | 22.3136  | 0.136223 | 48.81 |
| 2180   | 2015 | 0.145 | 0.09 | 1.439111 | 2.0710389 | 21.86086 | 0.151444 | 68.74 |
| 300381 | 2015 | 0.798 | 0.09 | 1.439111 | 2.0710389 | 21.224   | 0.056702 | 40.74 |
| 300050 | 2015 | -0.25 | 0.09 | 1.439111 | 2.0710389 | 21.6117  | 0.055324 | 24.13 |
| 2180   | 2015 | -0.16 | 0.09 | 1.439111 | 2.0710389 | 22.16159 | 0.151444 | 68.74 |
| 300146 | 2015 | -0.32 | 0.09 | 1.439111 | 2.0710389 | 22.3136  | 0.136223 | 48.81 |
| 300246 | 2015 | -0.11 | 0.09 | 1.439111 | 2.0710389 | 20.17965 | 0.063558 | 33.53 |
| 300050 | 2015 | 1.075 | 0.09 | 1.439111 | 2.0710389 | 21.62147 | 0.055324 | 24.13 |
| 2530   | 2015 | -0.63 | 0.09 | 1.433879 | 2.0560084 | 20.72289 | 0.046614 | 36.16 |
| 600805 | 2015 | -0.3  | 0.09 | 1.433879 | 2.0560084 | 23.04679 | 0.018365 | 23.06 |
| 2323   | 2015 | -0.24 | 0.09 | 1.433879 | 2.0560084 | 20.47789 | 0.166673 | 44.68 |
| 600805 | 2015 | -0.19 | 0.09 | 1.433879 | 2.0560084 | 23.05285 | 0.018365 | 23.06 |
| 600805 | 2015 | 0.149 | 0.09 | 1.433879 | 2.0560084 | 23.04679 | 0.018365 | 23.06 |
| 2530   | 2015 | -0.03 | 0.09 | 1.433879 | 2.0560084 | 20.53766 | 0.046614 | 36.16 |
| 600805 | 2015 | -0.19 | 0.09 | 1.433879 | 2.0560084 | 23.04679 | 0.018365 | 23.06 |
| 2323   | 2015 | -0.39 | 0.09 | 1.433879 | 2.0560084 | 20.47789 | 0.166673 | 44.68 |
| 2496   | 2015 | -0    | 0.09 | 1.433879 | 2.0560084 | 22.54334 | 0.04522  | 53.02 |
| 816    | 2015 | -0.43 | 0.09 | 1.433879 | 2.0560084 | 22.61433 | 0.001102 | 26.06 |
| 600805 | 2015 | -0.19 | 0.09 | 1.433879 | 2.0560084 | 23.04679 | 0.018365 | 23.06 |
| 2496   | 2015 | -0.53 | 0.09 | 1.433879 | 2.0560084 | 22.54334 | 0.04522  | 53.02 |
| 2496   | 2015 | -0.15 | 0.09 | 1.433879 | 2.0560084 | 22.54334 | 0.04522  | 53.02 |
| 2530   | 2015 | -0.52 | 0.09 | 1.433879 | 2.0560084 | 20.72289 | 0.046614 | 36.16 |
| 600805 | 2015 | -0.54 | 0.09 | 1.433879 | 2.0560084 | 23.04679 | 0.018365 | 23.06 |
| 816    | 2015 | -0.43 | 0.09 | 1.433879 | 2.0560084 | 22.43253 | 0.001102 | 26.06 |
| 2323   | 2015 | -0.39 | 0.09 | 1.433879 | 2.0560084 | 20.47789 | 0.166673 | 44.68 |
| 2323   | 2015 | -0.39 | 0.09 | 1.433879 | 2.0560084 | 21.98871 | 0.166673 | 44.68 |
| 2496   | 2015 | 0.274 | 0.09 | 1.433879 | 2.0560084 | 22.54334 | 0.04522  | 53.02 |
| 2496   | 2015 | -0.53 | 0.09 | 1.433879 | 2.0560084 | 22.27313 | 0.04522  | 53.02 |
| 2496   | 2015 | 0.016 | 0.09 | 1.433879 | 2.0560084 | 22.54334 | 0.04522  | 53.02 |
| 2496   | 2015 | 0.215 | 0.09 | 1.433879 | 2.0560084 | 22.54334 | 0.04522  | 53.02 |
| 600805 | 2015 | -0.01 | 0.09 | 1.433879 | 2.0560084 | 23.04679 | 0.018365 | 23.06 |
| 2496   | 2015 | 0.686 | 0.09 | 1.433879 | 2.0560084 | 22.54334 | 0.04522  | 53.02 |
| 600805 | 2015 | -0.93 | 0.09 | 1.433879 | 2.0560084 | 23.04679 | 0.018365 | 23.06 |
| 816    | 2015 | -0.43 | 0.09 | 1.433879 | 2.0560084 | 22.61433 | 0.001102 | 26.06 |
| 600805 | 2015 | -0.18 | 0.09 | 1.433879 | 2.0560084 | 23.04679 | 0.018365 | 23.06 |
| 2530   | 2015 | -0.2  | 0.09 | 1.433879 | 2.0560084 | 20.72289 | 0.046614 | 36.16 |
| 600805 | 2015 | -0.17 | 0.09 | 1.433879 | 2.0560084 | 23.04679 | 0.018365 | 23.06 |
| 2530   | 2015 | -0.03 | 0.09 | 1.433879 | 2.0560084 | 20.72289 | 0.046614 | 36.16 |
| 600805 | 2015 | -0.19 | 0.09 | 1.433879 | 2.0560084 | 23.04679 | 0.018365 | 23.06 |
| 2530   | 2015 | 0.013 | 0.09 | 1.433879 | 2.0560084 | 20.72289 | 0.046614 | 36.16 |
| 816    | 2015 | -0.43 | 0.09 | 1.433879 | 2.0560084 | 22.61433 | 0.001102 | 26.06 |
| 2530   | 2015 | -0.63 | 0.09 | 1.433879 | 2.0560084 | 20.72289 | 0.046614 | 36.16 |
| 2496   | 2015 | -0.53 | 0.09 | 1.433879 | 2.0560084 | 22.54334 | 0.04522  | 53.02 |
| 816    | 2015 | -0.43 | 0.09 | 1.433879 | 2.0560084 | 22.61433 | 0.001102 | 26.06 |
| 2323   | 2015 | -0.26 | 0.09 | 1.433879 | 2.0560084 | 20.47789 | 0.166673 | 44.68 |

|        |      |       |      |          |           |          |          |       |
|--------|------|-------|------|----------|-----------|----------|----------|-------|
| 2530   | 2015 | -0.51 | 0.09 | 1.433879 | 2.0560084 | 20.72289 | 0.046614 | 36.16 |
| 816    | 2015 | -0.43 | 0.09 | 1.433879 | 2.0560084 | 22.61433 | 0.001102 | 26.06 |
| 2323   | 2015 | -0.26 | 0.09 | 1.433879 | 2.0560084 | 20.47789 | 0.166673 | 44.68 |
| 2496   | 2015 | 0.274 | 0.09 | 1.433879 | 2.0560084 | 22.54334 | 0.04522  | 53.02 |
| 2496   | 2015 | -0.53 | 0.09 | 1.433879 | 2.0560084 | 22.54334 | 0.04522  | 53.02 |
| 600805 | 2015 | -0.19 | 0.09 | 1.433879 | 2.0560084 | 23.04679 | 0.018365 | 23.06 |
| 600805 | 2015 | -0.19 | 0.09 | 1.433879 | 2.0560084 | 23.04679 | 0.018365 | 23.06 |
| 59     | 2015 | -0.27 | 0.01 | 1.181166 | 1.3951524 | 24.1218  | 0.039331 | 47.54 |
| 59     | 2015 | -0.27 | 0.01 | 1.181166 | 1.3951524 | 24.1218  | 0.02125  | 47.54 |
| 59     | 2015 | -0.27 | 0.01 | 1.181166 | 1.3951524 | 24.03149 | 0.039331 | 47.54 |
| 962    | 2015 | -0.69 | 0.03 | 1.190335 | 1.416897  | 21.87649 | -0.4336  | 45.8  |
| 962    | 2015 | 0.206 | 0.03 | 1.190335 | 1.416897  | 21.87649 | -0.4336  | 45.8  |
| 600165 | 2015 | -0.92 | 0.03 | 1.190335 | 1.416897  | 22.09003 | 0.045693 | 29.2  |
| 962    | 2015 | -0.37 | 0.03 | 1.190335 | 1.416897  | 21.87649 | -0.4336  | 45.8  |
| 600165 | 2015 | -0.59 | 0.03 | 1.190335 | 1.416897  | 21.97333 | 0.045693 | 29.2  |
| 962    | 2015 | -0.45 | 0.03 | 1.190335 | 1.416897  | 21.85729 | -0.4336  | 45.8  |
| 600165 | 2015 | -0.28 | 0.03 | 1.190335 | 1.416897  | 22.09003 | 0.045693 | 29.2  |
| 600165 | 2015 | 0.404 | 0.03 | 1.190335 | 1.416897  | 22.09003 | 0.045693 | 29.2  |
| 600165 | 2015 | 0.404 | 0.03 | 1.190335 | 1.416897  | 22.09003 | 0.045693 | 29.2  |
| 962    | 2015 | 0.206 | 0.03 | 1.190335 | 1.416897  | 21.87649 | -0.4336  | 45.8  |
| 600165 | 2015 | -0.59 | 0.03 | 1.190335 | 1.416897  | 22.09003 | 0.045693 | 29.2  |
| 962    | 2015 | -0.69 | 0.03 | 1.190335 | 1.416897  | 21.87649 | -0.4336  | 45.8  |
| 600165 | 2015 | 0.404 | 0.03 | 1.190335 | 1.416897  | 22.09003 | 0.045693 | 29.2  |
| 962    | 2015 | -0.45 | 0.03 | 1.190335 | 1.416897  | 21.87649 | -0.4336  | 45.8  |
| 600812 | 2015 | -0.02 | 0.02 | 1.632533 | 2.6651645 | 23.49568 | 0.00965  | 36.93 |
| 300137 | 2015 | -0.42 | 0.02 | 1.632533 | 2.6651645 | 21.1014  | 0.065372 | 13.86 |
| 300368 | 2015 | -0.23 | 0.02 | 1.632533 | 2.6651645 | 21.09751 | 0.064903 | 35.48 |
| 600812 | 2015 | -0.2  | 0.02 | 1.632533 | 2.6651645 | 23.49568 | 0.00965  | 36.93 |
| 709    | 2015 | -0.47 | 0.02 | 1.632533 | 2.6651645 | 25.70916 | 0.008811 | 37.93 |
| 2603   | 2015 | 0.195 | 0.02 | 1.632533 | 2.6651645 | 22.46495 | 0.088413 | 33.37 |
| 300368 | 2015 | -0.23 | 0.02 | 1.632533 | 2.6651645 | 21.09751 | 0.064903 | 35.48 |
| 600812 | 2015 | -0.2  | 0.02 | 1.632533 | 2.6651645 | 23.49568 | 0.00965  | 36.93 |
| 413    | 2015 | -0.64 | 0.02 | 1.632533 | 2.6651645 | 23.80268 | 0.095631 | 21.64 |
| 2603   | 2015 | 0.195 | 0.02 | 1.632533 | 2.6651645 | 22.46495 | 0.088413 | 33.37 |
| 709    | 2015 | -0.37 | 0.02 | 1.632533 | 2.6651645 | 25.74206 | 0.008811 | 37.93 |
| 709    | 2015 | -0.37 | 0.02 | 1.632533 | 2.6651645 | 25.74206 | 0.008811 | 37.93 |
| 600803 | 2015 | -0.45 | 0.02 | 1.632533 | 2.6651645 | 22.39406 | 0.179685 | 30.97 |
| 300368 | 2015 | -0.01 | 0.02 | 1.632533 | 2.6651645 | 21.09751 | 0.064903 | 35.48 |
| 2691   | 2015 | -0.11 | 0.02 | 1.632533 | 2.6651645 | 20.6995  | 0.028381 | 64.5  |
| 300368 | 2015 | -0.23 | 0.02 | 1.632533 | 2.6651645 | 21.09751 | 0.064903 | 35.48 |
| 300137 | 2015 | -0.42 | 0.02 | 1.632533 | 2.6651645 | 21.21118 | 0.065372 | 13.86 |
| 2691   | 2015 | -0.16 | 0.02 | 1.632533 | 2.6651645 | 20.72787 | 0.028381 | 64.5  |
| 709    | 2015 | -0.5  | 0.02 | 1.632533 | 2.6651645 | 25.74206 | 0.008811 | 37.93 |
| 300137 | 2015 | -0.55 | 0.02 | 1.632533 | 2.6651645 | 21.21118 | 0.065372 | 13.86 |
| 158    | 2015 | -0.6  | 0.02 | 1.632533 | 2.6651645 | 23.11586 | 0.028179 | 27.32 |
| 300137 | 2015 | -0.18 | 0.02 | 1.632533 | 2.6651645 | 21.21118 | 0.065372 | 13.86 |
| 600803 | 2015 | -0.45 | 0.02 | 1.632533 | 2.6651645 | 23.15472 | 0.179685 | 30.97 |
| 413    | 2015 | -0.26 | 0.02 | 1.632533 | 2.6651645 | 24.08359 | 0.095631 | 21.64 |
| 2691   | 2015 | -0.22 | 0.02 | 1.632533 | 2.6651645 | 20.6995  | 0.028381 | 64.5  |
| 300368 | 2015 | 0.02  | 0.02 | 1.632533 | 2.6651645 | 21.09751 | 0.064903 | 35.48 |
| 413    | 2015 | 0.152 | 0.02 | 1.632533 | 2.6651645 | 24.08359 | 0.095631 | 21.64 |
| 158    | 2015 | -0.6  | 0.02 | 1.632533 | 2.6651645 | 23.11586 | 0.028179 | 27.32 |
| 2691   | 2015 | -0.16 | 0.02 | 1.632533 | 2.6651645 | 20.6995  | 0.028381 | 64.5  |
| 413    | 2015 | -0.45 | 0.02 | 1.632533 | 2.6651645 | 24.08359 | 0.095631 | 21.64 |

|        |      |       |      |          |           |          |          |       |
|--------|------|-------|------|----------|-----------|----------|----------|-------|
| 709    | 2015 | -0.37 | 0.02 | 1.632533 | 2.6651645 | 25.74206 | 0.008811 | 37.93 |
| 300137 | 2015 | -0.42 | 0.02 | 1.632533 | 2.6651645 | 21.21118 | 0.065372 | 13.86 |
| 2603   | 2015 | 0.195 | 0.02 | 1.632533 | 2.6651645 | 22.46495 | 0.088413 | 33.37 |
| 600812 | 2015 | -0.2  | 0.02 | 1.632533 | 2.6651645 | 23.49568 | 0.00965  | 36.93 |
| 600803 | 2015 | -0.81 | 0.02 | 1.632533 | 2.6651645 | 23.15472 | 0.179685 | 30.97 |
| 2282   | 2015 | -0.38 | 0.02 | 1.632533 | 2.6651645 | 20.69597 | 0.008437 | 13.83 |
| 413    | 2015 | -0.54 | 0.02 | 1.632533 | 2.6651645 | 24.08359 | 0.095631 | 21.64 |
| 300368 | 2015 | -0.01 | 0.02 | 1.632533 | 2.6651645 | 21.09751 | 0.064903 | 35.48 |
| 158    | 2015 | -0.6  | 0.02 | 1.632533 | 2.6651645 | 22.87619 | 0.028179 | 27.32 |
| 600812 | 2015 | -0.03 | 0.02 | 1.632533 | 2.6651645 | 23.49568 | 0.00965  | 36.93 |
| 600803 | 2015 | -0.45 | 0.02 | 1.632533 | 2.6651645 | 23.15472 | 0.179685 | 30.97 |
| 2282   | 2015 | -0.38 | 0.02 | 1.632533 | 2.6651645 | 20.75856 | 0.008437 | 13.83 |
| 709    | 2015 | -0.9  | 0.02 | 1.632533 | 2.6651645 | 25.74206 | 0.008811 | 37.93 |
| 600803 | 2015 | -0.45 | 0.02 | 1.632533 | 2.6651645 | 23.15472 | 0.179685 | 30.97 |
| 158    | 2015 | -0.6  | 0.02 | 1.632533 | 2.6651645 | 23.11586 | 0.028179 | 27.32 |
| 300368 | 2015 | -0.03 | 0.02 | 1.632533 | 2.6651645 | 21.09751 | 0.064903 | 35.48 |
| 600812 | 2015 | -0.2  | 0.02 | 1.632533 | 2.6651645 | 23.49568 | 0.00965  | 36.93 |
| 2603   | 2015 | 0.195 | 0.02 | 1.632533 | 2.6651645 | 22.46495 | 0.088413 | 33.37 |
| 2691   | 2015 | -0.16 | 0.02 | 1.632533 | 2.6651645 | 20.6995  | 0.028381 | 64.5  |
| 709    | 2015 | -0.44 | 0.02 | 1.632533 | 2.6651645 | 25.74206 | 0.008811 | 37.93 |
| 600812 | 2015 | -0.2  | 0.02 | 1.632533 | 2.6651645 | 23.49568 | 0.00965  | 36.93 |
| 2282   | 2015 | -0.51 | 0.02 | 1.632533 | 2.6651645 | 20.75856 | 0.008437 | 13.83 |
| 300368 | 2015 | 0.094 | 0.02 | 1.632533 | 2.6651645 | 20.88493 | 0.064903 | 35.48 |
| 600803 | 2015 | -0.45 | 0.02 | 1.632533 | 2.6651645 | 23.15472 | 0.179685 | 30.97 |
| 300368 | 2015 | 0.116 | 0.02 | 1.632533 | 2.6651645 | 21.09751 | 0.064903 | 35.48 |
| 2603   | 2015 | 0.195 | 0.02 | 1.632533 | 2.6651645 | 22.46495 | 0.088413 | 33.37 |
| 600803 | 2015 | -0.65 | 0.02 | 1.632533 | 2.6651645 | 23.15472 | 0.179685 | 30.97 |
| 300137 | 2015 | -0.42 | 0.02 | 1.632533 | 2.6651645 | 21.21118 | 0.065372 | 13.86 |
| 709    | 2015 | -0.72 | 0.02 | 1.632533 | 2.6651645 | 25.74206 | 0.008811 | 37.93 |
| 709    | 2015 | -0.37 | 0.02 | 1.632533 | 2.6651645 | 25.74206 | 0.008811 | 37.93 |
| 413    | 2015 | -0.53 | 0.02 | 1.632533 | 2.6651645 | 24.08359 | 0.095631 | 21.64 |
| 600803 | 2015 | -0.45 | 0.02 | 1.632533 | 2.6651645 | 23.15472 | 0.179685 | 30.97 |
| 413    | 2015 | 0.555 | 0.02 | 1.632533 | 2.6651645 | 24.08359 | 0.095631 | 21.64 |
| 600812 | 2015 | -0.07 | 0.02 | 1.632533 | 2.6651645 | 23.49568 | 0.00965  | 36.93 |
| 600812 | 2015 | -0.2  | 0.02 | 1.632533 | 2.6651645 | 23.49568 | 0.00965  | 36.93 |
| 600812 | 2015 | 0.159 | 0.02 | 1.632533 | 2.6651645 | 23.49568 | 0.00965  | 36.93 |
| 2691   | 2015 | -0.16 | 0.02 | 1.632533 | 2.6651645 | 20.6995  | 0.028381 | 64.5  |
| 600812 | 2015 | -0.2  | 0.02 | 1.632533 | 2.6651645 | 23.49568 | 0.00965  | 36.93 |
| 600812 | 2015 | -0.01 | 0.02 | 1.632533 | 2.6651645 | 23.49568 | 0.00965  | 36.93 |
| 300137 | 2015 | -0.42 | 0.02 | 1.632533 | 2.6651645 | 21.21118 | 0.065372 | 13.86 |
| 600803 | 2015 | -0.33 | 0.02 | 1.632533 | 2.6651645 | 23.15472 | 0.179685 | 30.97 |
| 158    | 2015 | -0.6  | 0.02 | 1.632533 | 2.6651645 | 23.11586 | 0.045782 | 27.32 |
| 300137 | 2015 | -0.24 | 0.02 | 1.632533 | 2.6651645 | 21.21118 | 0.065372 | 13.86 |
| 300368 | 2015 | 0.02  | 0.02 | 1.632533 | 2.6651645 | 21.09751 | 0.064903 | 35.48 |
| 300137 | 2015 | 0.025 | 0.02 | 1.632533 | 2.6651645 | 21.21118 | 0.065372 | 13.86 |
| 709    | 2015 | -0.71 | 0.02 | 1.632533 | 2.6651645 | 25.74206 | 0.008811 | 37.93 |
| 413    | 2015 | -0.17 | 0.02 | 1.632533 | 2.6651645 | 23.80268 | 0.095631 | 21.64 |
| 600812 | 2015 | 0.147 | 0.02 | 1.632533 | 2.6651645 | 23.49568 | 0.00965  | 36.93 |
| 2282   | 2015 | -0.39 | 0.02 | 1.632533 | 2.6651645 | 20.75856 | 0.008437 | 13.83 |
| 413    | 2015 | -0.41 | 0.02 | 1.632533 | 2.6651645 | 23.80268 | 0.095631 | 21.64 |
| 2603   | 2015 | 0.195 | 0.02 | 1.632533 | 2.6651645 | 22.46495 | 0.088413 | 33.37 |
| 600803 | 2015 | -0.81 | 0.02 | 1.632533 | 2.6651645 | 23.15472 | 0.179685 | 30.97 |
| 600803 | 2015 | 0.511 | 0.02 | 1.632533 | 2.6651645 | 23.15472 | 0.179685 | 30.97 |
| 2282   | 2015 | -0.51 | 0.02 | 1.632533 | 2.6651645 | 20.75856 | 0.008437 | 13.83 |

|        |      |       |      |          |            |          |          |       |
|--------|------|-------|------|----------|------------|----------|----------|-------|
| 709    | 2015 | -0.37 | 0.02 | 1.632533 | 2.6651645  | 25.74206 | 0.008811 | 37.93 |
| 600812 | 2015 | -0.07 | 0.02 | 1.632533 | 2.6651645  | 23.49568 | 0.00965  | 36.93 |
| 600803 | 2015 | 0.053 | 0.02 | 1.632533 | 2.6651645  | 23.15472 | 0.179685 | 30.97 |
| 413    | 2015 | -0.53 | 0.02 | 1.632533 | 2.6651645  | 24.08359 | 0.095631 | 21.64 |
| 2603   | 2015 | 0.195 | 0.02 | 1.632533 | 2.6651645  | 22.36927 | 0.088413 | 33.37 |
| 600812 | 2015 | -0.03 | 0.02 | 1.632533 | 2.6651645  | 23.49568 | 0.00965  | 36.93 |
| 600812 | 2015 | -0.2  | 0.02 | 1.632533 | 2.6651645  | 23.42114 | 0.00965  | 36.93 |
| 600803 | 2015 | -0.45 | 0.02 | 1.632533 | 2.6651645  | 23.15472 | 0.179685 | 30.97 |
| 2702   | 2015 | -0.6  | 0.11 | 0.287682 | 0.08276083 | 20.6859  | -0.05284 | 23.62 |
| 600067 | 2015 | -0.53 | 0.11 | 0.287682 | 0.08276083 | 23.28063 | 0.05216  | 30.18 |
| 2512   | 2015 | -0.08 | 0.11 | 0.287682 | 0.08276083 | 22.33877 | 0.05262  | 44.11 |
| 600103 | 2015 | -0.62 | 0.11 | 0.287682 | 0.08276083 | 21.91026 | -0.10558 | 9.89  |
| 2512   | 2015 | -0.08 | 0.11 | 0.287682 | 0.08276083 | 22.33877 | 0.05262  | 44.11 |
| 2639   | 2015 | -0.19 | 0.11 | 0.287682 | 0.08276083 | 21.63914 | 0.008929 | 33.05 |
| 547    | 2015 | 1.19  | 0.11 | 0.287682 | 0.08276083 | 22.63799 | 0.039291 | 8.12  |
| 2229   | 2015 | -0.64 | 0.11 | 0.287682 | 0.08276083 | 21.13166 | 0.016204 | 16.7  |
| 2529   | 2015 | 0.75  | 0.11 | 0.287682 | 0.08276083 | 20.88533 | 0.002809 | 24.28 |
| 2512   | 2015 | -0.24 | 0.11 | 0.287682 | 0.08276083 | 22.33877 | 0.05262  | 44.11 |
| 2639   | 2015 | -0.19 | 0.11 | 0.287682 | 0.08276083 | 21.63914 | 0.008929 | 33.05 |
| 600660 | 2015 | -0.28 | 0.11 | 0.287682 | 0.08276083 | 23.9352  | 0.158848 | 20.15 |
| 600103 | 2015 | -0.62 | 0.11 | 0.287682 | 0.08276083 | 21.91026 | -0.10558 | 9.89  |
| 2474   | 2015 | 0.487 | 0.11 | 0.287682 | 0.08276083 | 21.37435 | 0.01118  | 23.09 |
| 547    | 2015 | 1.156 | 0.11 | 0.287682 | 0.08276083 | 22.63799 | 0.039291 | 8.12  |
| 600660 | 2015 | -0.51 | 0.11 | 0.287682 | 0.08276083 | 23.9352  | 0.158848 | 20.15 |
| 600660 | 2015 | 0.078 | 0.11 | 0.287682 | 0.08276083 | 23.9352  | 0.158848 | 20.15 |
| 547    | 2015 | 0.517 | 0.11 | 0.287682 | 0.08276083 | 22.63799 | 0.039291 | 8.12  |
| 2702   | 2015 | -0.42 | 0.11 | 0.287682 | 0.08276083 | 20.6859  | -0.05284 | 23.62 |
| 547    | 2015 | 1.808 | 0.11 | 0.287682 | 0.08276083 | 22.63799 | 0.039291 | 8.12  |
| 2396   | 2015 | 1.743 | 0.11 | 0.287682 | 0.08276083 | 22.39922 | 0.143114 | 28    |
| 300062 | 2015 | -0.46 | 0.11 | 0.287682 | 0.08276083 | 21.65936 | 0.023382 | 25.46 |
| 600660 | 2015 | -0.19 | 0.11 | 0.287682 | 0.08276083 | 23.9352  | 0.158848 | 20.15 |
| 536    | 2015 | 0.235 | 0.11 | 0.287682 | 0.08276083 | 22.91745 | 0.066344 | 63.63 |
| 300062 | 2015 | -0.46 | 0.11 | 0.287682 | 0.08276083 | 21.65936 | 0.023382 | 25.46 |
| 2222   | 2015 | 0.375 | 0.11 | 0.287682 | 0.08276083 | 20.30634 | 0.057416 | 26.61 |
| 2396   | 2015 | 1.171 | 0.11 | 0.287682 | 0.08276083 | 22.39922 | 0.143114 | 28    |
| 600660 | 2015 | -0.29 | 0.11 | 0.287682 | 0.08276083 | 23.9352  | 0.158848 | 20.15 |
| 997    | 2015 | 0.484 | 0.11 | 0.287682 | 0.08276083 | 22.29145 | 0.159532 | 32.91 |
| 600660 | 2015 | 0.066 | 0.11 | 0.287682 | 0.08276083 | 23.9352  | 0.158848 | 20.15 |
| 997    | 2015 | -0.07 | 0.11 | 0.287682 | 0.08276083 | 22.29145 | 0.159532 | 32.91 |
| 2229   | 2015 | -0.53 | 0.11 | 0.287682 | 0.08276083 | 21.438   | 0.016204 | 16.7  |
| 600203 | 2015 | -0.68 | 0.11 | 0.287682 | 0.08276083 | 22.26718 | 0.067506 | 24.78 |
| 997    | 2015 | 1.253 | 0.11 | 0.287682 | 0.08276083 | 22.29145 | 0.159532 | 32.91 |
| 2222   | 2015 | 0.375 | 0.11 | 0.287682 | 0.08276083 | 20.35821 | 0.057416 | 26.61 |
| 536    | 2015 | 0.235 | 0.11 | 0.287682 | 0.08276083 | 22.28144 | 0.066344 | 63.63 |
| 300299 | 2015 | 0.527 | 0.11 | 0.287682 | 0.08276083 | 21.20419 | 0.054619 | 23.05 |
| 2702   | 2015 | -0.63 | 0.11 | 0.287682 | 0.08276083 | 20.6859  | -0.05284 | 23.62 |
| 2529   | 2015 | 0.882 | 0.11 | 0.287682 | 0.08276083 | 20.92268 | 0.002809 | 24.28 |
| 2222   | 2015 | 0.151 | 0.11 | 0.287682 | 0.08276083 | 20.30634 | 0.057416 | 26.61 |
| 2702   | 2015 | -0.59 | 0.11 | 0.287682 | 0.08276083 | 20.6859  | -0.05284 | 23.62 |
| 2396   | 2015 | 1.377 | 0.11 | 0.287682 | 0.08276083 | 21.61324 | 0.143114 | 28    |
| 300299 | 2015 | 0.527 | 0.11 | 0.287682 | 0.08276083 | 21.20419 | 0.054619 | 23.05 |
| 2512   | 2015 | 0.571 | 0.11 | 0.287682 | 0.08276083 | 22.33877 | 0.05262  | 44.11 |
| 592    | 2015 | -0.96 | 0.11 | 0.287682 | 0.08276083 | 22.05771 | 0.012199 | 31.48 |
| 2396   | 2015 | 0.418 | 0.11 | 0.287682 | 0.08276083 | 22.39922 | 0.143114 | 28    |

|        |      |       |      |          |            |          |          |       |
|--------|------|-------|------|----------|------------|----------|----------|-------|
| 2512   | 2015 | 0.235 | 0.11 | 0.287682 | 0.08276083 | 22.33877 | 0.05262  | 44.11 |
| 300299 | 2015 | 0.527 | 0.11 | 0.287682 | 0.08276083 | 21.20419 | 0.054619 | 23.05 |
| 2222   | 2015 | 0.375 | 0.11 | 0.287682 | 0.08276083 | 20.30634 | 0.057416 | 26.61 |
| 547    | 2015 | 0.714 | 0.11 | 0.287682 | 0.08276083 | 22.29123 | 0.039291 | 8.12  |
| 600103 | 2015 | -0.62 | 0.11 | 0.287682 | 0.08276083 | 21.79049 | -0.10558 | 9.89  |
| 600660 | 2015 | -0.28 | 0.11 | 0.287682 | 0.08276083 | 23.9352  | 0.158848 | 20.15 |
| 536    | 2015 | 0.235 | 0.11 | 0.287682 | 0.08276083 | 22.28144 | 0.066344 | 63.63 |
| 536    | 2015 | -0.8  | 0.11 | 0.287682 | 0.08276083 | 22.28144 | 0.066344 | 63.63 |
| 2529   | 2015 | 0.863 | 0.11 | 0.287682 | 0.08276083 | 20.92268 | 0.002809 | 24.28 |
| 536    | 2015 | -0.8  | 0.11 | 0.287682 | 0.08276083 | 22.28144 | 0.066344 | 63.63 |
| 2529   | 2015 | 0.882 | 0.11 | 0.287682 | 0.08276083 | 20.92268 | 0.002809 | 24.28 |
| 2512   | 2015 | 0.48  | 0.11 | 0.287682 | 0.08276083 | 22.33877 | 0.05262  | 44.11 |
| 2093   | 2015 | 0.935 | 0.11 | 0.287682 | 0.08276083 | 21.76969 | 0.02901  | 25.51 |
| 2702   | 2015 | -0.42 | 0.11 | 0.287682 | 0.08276083 | 20.69036 | -0.05284 | 23.62 |
| 2474   | 2015 | 0.487 | 0.11 | 0.287682 | 0.08276083 | 21.36852 | 0.01118  | 23.09 |
| 2229   | 2015 | -0.32 | 0.11 | 0.287682 | 0.08276083 | 21.438   | 0.016204 | 16.7  |
| 300062 | 2015 | -0.46 | 0.11 | 0.287682 | 0.08276083 | 21.65936 | 0.023382 | 25.46 |
| 2396   | 2015 | 1.07  | 0.11 | 0.287682 | 0.08276083 | 22.39922 | 0.143114 | 28    |
| 2229   | 2015 | -0.69 | 0.11 | 0.287682 | 0.08276083 | 21.438   | 0.016204 | 16.7  |
| 2222   | 2015 | 0.375 | 0.11 | 0.287682 | 0.08276083 | 20.30634 | 0.057416 | 26.61 |
| 2093   | 2015 | 0.935 | 0.11 | 0.287682 | 0.08276083 | 21.76969 | 0.02901  | 25.51 |
| 600103 | 2015 | -0.62 | 0.11 | 0.287682 | 0.08276083 | 21.91026 | -0.10558 | 9.89  |
| 600203 | 2015 | -0.68 | 0.11 | 0.287682 | 0.08276083 | 22.26718 | 0.067506 | 24.78 |
| 2222   | 2015 | 0.151 | 0.11 | 0.287682 | 0.08276083 | 20.30634 | 0.057416 | 26.61 |
| 600660 | 2015 | -0.39 | 0.11 | 0.287682 | 0.08276083 | 23.9352  | 0.158848 | 20.15 |
| 2093   | 2015 | 0.935 | 0.11 | 0.287682 | 0.08276083 | 21.76969 | 0.02901  | 25.51 |
| 536    | 2015 | 0.529 | 0.11 | 0.287682 | 0.08276083 | 22.28144 | 0.066344 | 63.63 |
| 600660 | 2015 | -0.43 | 0.11 | 0.287682 | 0.08276083 | 23.9352  | 0.158848 | 20.15 |
| 997    | 2015 | 0.75  | 0.11 | 0.287682 | 0.08276083 | 22.29145 | 0.159532 | 32.91 |
| 2474   | 2015 | 0.818 | 0.11 | 0.287682 | 0.08276083 | 21.36852 | 0.01118  | 23.09 |
| 2396   | 2015 | 0.932 | 0.11 | 0.287682 | 0.08276083 | 22.39922 | 0.143114 | 28    |
| 2396   | 2015 | 1.584 | 0.11 | 0.287682 | 0.08276083 | 22.39922 | 0.143114 | 28    |
| 2396   | 2015 | 1.292 | 0.11 | 0.287682 | 0.08276083 | 22.39922 | 0.143114 | 28    |
| 2229   | 2015 | -0.69 | 0.11 | 0.287682 | 0.08276083 | 21.438   | 0.016204 | 16.7  |
| 600660 | 2015 | -0.57 | 0.11 | 0.287682 | 0.08276083 | 23.9352  | 0.158848 | 20.15 |
| 2093   | 2015 | 0.935 | 0.11 | 0.287682 | 0.08276083 | 21.41037 | 0.02901  | 25.51 |
| 2474   | 2015 | 1.13  | 0.11 | 0.287682 | 0.08276083 | 21.36852 | 0.01118  | 23.09 |
| 592    | 2015 | -0.96 | 0.11 | 0.287682 | 0.08276083 | 22.05771 | 0.012199 | 31.48 |
| 2229   | 2015 | -0.53 | 0.11 | 0.287682 | 0.08276083 | 21.438   | 0.016204 | 16.7  |
| 2396   | 2015 | 1.221 | 0.11 | 0.287682 | 0.08276083 | 22.39922 | 0.143114 | 28    |
| 2639   | 2015 | -0.19 | 0.11 | 0.287682 | 0.08276083 | 21.63914 | 0.008929 | 33.05 |
| 2529   | 2015 | 0.874 | 0.11 | 0.287682 | 0.08276083 | 20.92268 | 0.002809 | 24.28 |
| 2512   | 2015 | 0.237 | 0.11 | 0.287682 | 0.08276083 | 22.33877 | 0.05262  | 44.11 |
| 592    | 2015 | -0.96 | 0.11 | 0.287682 | 0.08276083 | 21.86009 | 0.012199 | 31.48 |
| 300062 | 2015 | -0.46 | 0.11 | 0.287682 | 0.08276083 | 20.96187 | 0.023382 | 25.46 |
| 300062 | 2015 | -0.46 | 0.11 | 0.287682 | 0.08276083 | 21.65936 | 0.023382 | 25.46 |
| 600203 | 2015 | -0.81 | 0.11 | 0.287682 | 0.08276083 | 22.26718 | 0.067506 | 24.78 |
| 300062 | 2015 | -0.46 | 0.11 | 0.287682 | 0.08276083 | 21.65936 | 0.023382 | 25.46 |
| 600203 | 2015 | -0.68 | 0.11 | 0.287682 | 0.08276083 | 22.26718 | 0.067506 | 24.78 |
| 2222   | 2015 | 0.325 | 0.11 | 0.287682 | 0.08276083 | 20.30634 | 0.057416 | 26.61 |
| 600660 | 2015 | -0.22 | 0.11 | 0.287682 | 8.28E-02   | 23.9352  | 0.158848 | 20.15 |
| 600203 | 2015 | -0.68 | 0.11 | 0.287682 | 8.28E-02   | 21.60654 | 0.067506 | 24.78 |
| 2396   | 2015 | 1.316 | 0.11 | 0.287682 | 8.28E-02   | 22.39922 | 0.143114 | 28    |
| 600067 | 2015 | -0.53 | 0.11 | 0.287682 | 8.28E-02   | 23.28063 | 0.05216  | 30.18 |

|        |      |       |      |          |            |          |          |       |
|--------|------|-------|------|----------|------------|----------|----------|-------|
| 997    | 2015 | 0.538 | 0.11 | 0.287682 | 8.28E-02   | 22.29145 | 0.159532 | 32.91 |
| 2093   | 2015 | 0.935 | 0.11 | 0.287682 | 8.28E-02   | 21.76969 | 0.02901  | 25.51 |
| 2093   | 2015 | 0.935 | 0.11 | 0.287682 | 8.28E-02   | 21.76969 | 0.02901  | 25.51 |
| 2639   | 2015 | -0.19 | 0.11 | 0.287682 | 8.28E-02   | 21.63914 | 0.008929 | 33.05 |
| 2512   | 2015 | -0.4  | 0.11 | 0.287682 | 0.08276083 | 22.33877 | 0.05262  | 44.11 |
| 600660 | 2015 | -0.26 | 0.11 | 0.287682 | 0.08276083 | 23.73463 | 0.158848 | 20.15 |
| 2529   | 2015 | 0.75  | 0.11 | 0.287682 | 0.08276083 | 20.92268 | 0.002809 | 24.28 |
| 547    | 2015 | 1.19  | 0.11 | 0.287682 | 0.08276083 | 22.63799 | 0.039291 | 8.12  |
| 2512   | 2015 | -0.24 | 0.11 | 0.287682 | 0.08276083 | 22.14506 | 0.05262  | 44.11 |
| 600660 | 2015 | -0.34 | 0.11 | 0.287682 | 0.08276083 | 23.9352  | 0.158848 | 20.15 |
| 997    | 2015 | 0.455 | 0.11 | 0.287682 | 0.08276083 | 21.64643 | 0.159532 | 32.91 |
| 300299 | 2015 | 0.527 | 0.11 | 0.287682 | 0.08276083 | 21.20419 | 0.054619 | 23.05 |
| 536    | 2015 | 0.235 | 0.11 | 0.287682 | 0.08276083 | 22.28144 | 0.066344 | 63.63 |
| 300062 | 2015 | -0.46 | 0.11 | 0.287682 | 0.08276083 | 21.65936 | 0.023382 | 25.46 |
| 2474   | 2015 | 0.818 | 0.11 | 0.287682 | 0.08276083 | 21.36852 | 0.01118  | 23.09 |
| 600067 | 2015 | -0.53 | 0.11 | 0.287682 | 0.08276083 | 23.71344 | 0.05216  | 30.18 |
| 2512   | 2015 | 0.237 | 0.11 | 0.287682 | 0.08276083 | 22.33877 | 0.05262  | 44.11 |
| 600067 | 2015 | -0.53 | 0.11 | 0.287682 | 0.08276083 | 23.28063 | 0.05216  | 30.18 |
| 300299 | 2015 | 0.527 | 0.11 | 0.287682 | 0.08276083 | 21.06447 | 0.054619 | 23.05 |
| 600660 | 2015 | -0.25 | 0.11 | 0.287682 | 0.08276083 | 23.9352  | 0.158848 | 20.15 |
| 2474   | 2015 | 1.39  | 0.11 | 0.287682 | 0.08276083 | 21.36852 | 0.01118  | 23.09 |
| 997    | 2015 | 0.333 | 0.11 | 0.287682 | 0.08276083 | 22.29145 | 0.159532 | 32.91 |
| 2639   | 2015 | -0.19 | 0.11 | 0.287682 | 0.08276083 | 21.58252 | 0.008929 | 33.05 |
| 600660 | 2015 | -0.19 | 0.11 | 0.287682 | 0.08276083 | 23.9352  | 0.158848 | 20.15 |
| 600203 | 2015 | -0.68 | 0.11 | 0.287682 | 0.08276083 | 22.26718 | 0.067506 | 24.78 |
| 547    | 2015 | 0.714 | 0.11 | 0.287682 | 0.08276083 | 22.63799 | 0.039291 | 8.12  |
| 2229   | 2015 | -0.32 | 0.11 | 0.287682 | 0.08276083 | 21.438   | 0.016204 | 16.7  |
| 997    | 2015 | 0.634 | 0.11 | 0.287682 | 0.08276083 | 22.29145 | 0.159532 | 32.91 |
| 600660 | 2015 | -0.48 | 0.11 | 0.287682 | 0.08276083 | 23.9352  | 0.158848 | 20.15 |
| 2702   | 2015 | -0.57 | 0.11 | 0.287682 | 0.08276083 | 20.6859  | -0.05284 | 23.62 |
| 547    | 2015 | 0.982 | 0.11 | 0.287682 | 0.08276083 | 22.63799 | 0.039291 | 8.12  |
| 600660 | 2015 | -0.18 | 0.11 | 0.287682 | 0.08276083 | 23.9352  | 0.158848 | 20.15 |
| 600103 | 2015 | -0.62 | 0.11 | 0.287682 | 0.08276083 | 21.91026 | -0.10558 | 9.89  |
| 600203 | 2015 | -0.68 | 0.11 | 0.287682 | 0.08276083 | 22.26718 | 0.067506 | 24.78 |
| 2529   | 2015 | 0.874 | 0.11 | 0.287682 | 0.08276083 | 20.92268 | 0.002809 | 24.28 |
| 2474   | 2015 | 0.487 | 0.11 | 0.287682 | 0.08276083 | 21.36852 | 0.01118  | 23.09 |
| 300062 | 2015 | -0.46 | 0.11 | 0.287682 | 0.08276083 | 21.65936 | 0.023382 | 25.46 |
| 2474   | 2015 | 1.184 | 0.11 | 0.287682 | 0.08276083 | 21.36852 | 0.01118  | 23.09 |
| 997    | 2015 | 0.301 | 0.11 | 0.287682 | 0.08276083 | 22.29145 | 0.159532 | 32.91 |
| 600203 | 2015 | -0.57 | 0.11 | 0.287682 | 0.08276083 | 22.26718 | 0.067506 | 24.78 |
| 300062 | 2015 | -0.46 | 0.11 | 0.287682 | 0.08276083 | 21.65936 | 0.023382 | 25.46 |
| 600660 | 2015 | -0.47 | 0.11 | 0.287682 | 0.08276083 | 23.9352  | 0.158848 | 20.15 |
| 600203 | 2015 | -0.68 | 0.11 | 0.287682 | 0.08276083 | 22.26718 | 0.067506 | 24.78 |
| 600067 | 2015 | -0.53 | 0.11 | 0.287682 | 0.08276083 | 23.28063 | 0.05216  | 30.18 |
| 600660 | 2015 | 0.049 | 0.11 | 0.287682 | 8.28E-02   | 23.9352  | 0.158848 | 20.15 |
| 2396   | 2015 | 1.221 | 0.11 | 0.287682 | 8.28E-02   | 22.39922 | 0.143114 | 28    |
| 2702   | 2015 | -0.42 | 0.11 | 0.287682 | 8.28E-02   | 20.6859  | -0.05284 | 23.62 |
| 2396   | 2015 | 1.399 | 0.11 | 0.287682 | 8.28E-02   | 22.39922 | 0.143114 | 28    |
| 536    | 2015 | 0.235 | 0.11 | 0.287682 | 8.28E-02   | 22.28144 | 0.066344 | 63.63 |
| 2396   | 2015 | 1.537 | 0.11 | 0.287682 | 8.28E-02   | 22.39922 | 0.143114 | 28    |
| 997    | 2015 | 0.538 | 0.11 | 0.287682 | 0.08276083 | 22.29145 | 0.159532 | 32.91 |
| 600203 | 2015 | -0.81 | 0.11 | 0.287682 | 0.08276083 | 22.26718 | 0.067506 | 24.78 |
| 536    | 2015 | 0.235 | 0.11 | 0.287682 | 0.08276083 | 22.28144 | 0.066344 | 63.63 |
| 2459   | 2015 | -0.19 | 0.02 | 1.36726  | 1.8693995  | 21.02547 | -0.26605 | 36.39 |



|        |      |       |      |          |           |          |          |       |
|--------|------|-------|------|----------|-----------|----------|----------|-------|
| 2459   | 2015 | -0.3  | 0.02 | 1.36726  | 1.8693995 | 20.99212 | -0.26605 | 36.39 |
| 2459   | 2015 | -0.3  | 0.02 | 1.36726  | 1.8693995 | 21.02547 | -0.26605 | 36.39 |
| 2459   | 2015 | -0.26 | 0.02 | 1.36726  | 1.8693995 | 21.02547 | -0.26605 | 36.39 |
| 2459   | 2015 | -0.19 | 0.02 | 1.36726  | 1.8693995 | 21.02547 | -0.26605 | 36.39 |
| 2459   | 2015 | -0.19 | 0.02 | 1.36726  | 1.8693995 | 21.02547 | -0.26605 | 36.39 |
| 600139 | 2015 | -0.46 | 0.04 | 1.062306 | 1.1284943 | 22.80737 | -0.14086 | 40.46 |
| 601208 | 2015 | 0.343 | 0.04 | 1.062306 | 1.1284943 | 21.92383 | 0.029416 | 23.35 |
| 801    | 2015 | 1.007 | 0.04 | 1.062306 | 1.1284943 | 22.28304 | 0.101768 | 47.61 |
| 600839 | 2015 | -0.17 | 0.04 | 1.062306 | 1.1284943 | 24.74173 | -0.09688 | 23.2  |
| 600839 | 2015 | -0.52 | 0.04 | 1.062306 | 1.1284943 | 24.12401 | -0.09688 | 23.2  |
| 600839 | 2015 | -0.46 | 0.04 | 1.062306 | 1.1284943 | 24.74173 | -0.09688 | 23.2  |
| 2258   | 2015 | 0.511 | 0.04 | 1.062306 | 1.1284943 | 21.66197 | 0.093301 | 27.26 |
| 600139 | 2015 | -0.45 | 0.04 | 1.062306 | 1.1284943 | 22.80737 | -0.14086 | 40.46 |
| 600839 | 2015 | -0.15 | 0.04 | 1.062306 | 1.1284943 | 24.74173 | -0.09688 | 23.2  |
| 600839 | 2015 | -0.22 | 0.04 | 1.062306 | 1.1284943 | 24.74173 | -0.09688 | 23.2  |
| 2258   | 2015 | 0.325 | 0.04 | 1.062306 | 1.1284943 | 21.66197 | 0.093301 | 27.26 |
| 876    | 2015 | 0.162 | 0.04 | 1.062306 | 1.1284943 | 24.2848  | 0.122624 | 29.41 |
| 600839 | 2015 | 0.115 | 0.04 | 1.062306 | 1.1284943 | 24.74173 | -0.09688 | 23.2  |
| 876    | 2015 | 0.322 | 0.04 | 1.062306 | 1.1284943 | 24.2848  | 0.122624 | 29.41 |
| 801    | 2015 | 1.007 | 0.04 | 1.062306 | 1.1284943 | 22.28304 | 0.101768 | 47.61 |
| 600839 | 2015 | -0.19 | 0.04 | 1.062306 | 1.1284943 | 24.74173 | -0.09688 | 23.2  |
| 2258   | 2015 | 0.308 | 0.04 | 1.062306 | 1.1284943 | 21.3008  | 0.093301 | 27.26 |
| 876    | 2015 | 0.271 | 0.04 | 1.062306 | 1.1284943 | 23.5683  | 0.122624 | 29.41 |
| 601208 | 2015 | 0.42  | 0.04 | 1.062306 | 1.1284943 | 21.92383 | 0.029416 | 23.35 |
| 600139 | 2015 | -0.46 | 0.04 | 1.062306 | 1.1284943 | 22.80737 | -0.14086 | 40.46 |
| 601208 | 2015 | 0.878 | 0.04 | 1.062306 | 1.1284943 | 21.92383 | 0.029416 | 23.35 |
| 600839 | 2015 | -0.05 | 0.04 | 1.062306 | 1.1284943 | 24.74173 | -0.09688 | 23.2  |
| 876    | 2015 | 0.279 | 0.04 | 1.062306 | 1.1284943 | 24.2848  | 0.122624 | 29.41 |
| 801    | 2015 | 0.413 | 0.04 | 1.062306 | 1.1284943 | 22.28304 | 0.101768 | 47.61 |
| 600139 | 2015 | -0.39 | 0.04 | 1.062306 | 1.1284943 | 22.80737 | -0.14086 | 40.46 |
| 601208 | 2015 | 0.093 | 0.04 | 1.062306 | 1.1284943 | 21.92383 | 0.029416 | 23.35 |
| 601208 | 2015 | 0.878 | 0.04 | 1.062306 | 1.1284943 | 21.92383 | 0.029416 | 23.35 |
| 601208 | 2015 | 0.649 | 0.04 | 1.062306 | 1.1284943 | 21.92383 | 0.029416 | 23.35 |
| 600839 | 2015 | -0.15 | 0.04 | 1.062306 | 1.1284943 | 24.74173 | -0.09688 | 23.2  |
| 600839 | 2015 | -0.15 | 0.04 | 1.062306 | 1.1284943 | 24.74173 | -0.09688 | 23.2  |
| 2258   | 2015 | 0.308 | 0.04 | 1.062306 | 1.1284943 | 21.66197 | 0.093301 | 27.26 |
| 601208 | 2015 | 0.42  | 0.04 | 1.062306 | 1.1284943 | 21.92383 | 0.029416 | 23.35 |
| 600839 | 2015 | -0.04 | 0.04 | 1.062306 | 1.1284943 | 24.74173 | -0.09688 | 23.2  |
| 801    | 2015 | 1.007 | 0.04 | 1.062306 | 1.1284943 | 22.28304 | 0.101768 | 47.61 |
| 876    | 2015 | 0.33  | 0.04 | 1.062306 | 1.1284943 | 24.2848  | 0.122624 | 29.41 |
| 801    | 2015 | 0.203 | 0.04 | 1.062306 | 1.1284943 | 22.28304 | 0.101768 | 47.61 |
| 600839 | 2015 | -0.15 | 0.04 | 1.062306 | 1.1284943 | 24.74173 | -0.09688 | 23.2  |
| 601208 | 2015 | 0.534 | 0.04 | 1.062306 | 1.1284943 | 21.92383 | 0.029416 | 23.35 |
| 801    | 2015 | 0.413 | 0.04 | 1.062306 | 1.1284943 | 22.28304 | 0.101768 | 47.61 |
| 600839 | 2015 | -0.15 | 0.04 | 1.062306 | 1.1284943 | 24.74173 | -0.09688 | 23.2  |
| 600839 | 2015 | 0.618 | 0.04 | 1.062306 | 1.1284943 | 24.74173 | -0.09688 | 23.2  |
| 600839 | 2015 | 0.275 | 0.04 | 1.062306 | 1.1284943 | 24.74173 | -0.09688 | 23.2  |
| 601208 | 2015 | 0.289 | 0.04 | 1.062306 | 1.1284943 | 21.63086 | 0.029416 | 23.35 |
| 600839 | 2015 | -0.36 | 0.04 | 1.062306 | 1.1284943 | 24.74173 | -0.09688 | 23.2  |
| 876    | 2015 | 0.279 | 0.04 | 1.062306 | 1.1284943 | 24.2848  | 0.122624 | 29.41 |
| 876    | 2015 | 0.279 | 0.04 | 1.062306 | 1.1284943 | 24.2848  | 0.122624 | 29.41 |
| 876    | 2015 | -0.12 | 0.04 | 1.062306 | 1.1284943 | 24.2848  | 0.122624 | 29.41 |
| 876    | 2015 | 0.342 | 0.04 | 1.062306 | 1.1284943 | 24.2848  | 0.122624 | 29.41 |
| 876    | 2015 | 0.128 | 0.04 | 1.062306 | 1.1284943 | 24.2848  | 0.122624 | 29.41 |

|        |      |       |      |          |           |          |          |       |
|--------|------|-------|------|----------|-----------|----------|----------|-------|
| 600839 | 2015 | -0.71 | 0.04 | 1.062306 | 1.1284943 | 24.74173 | -0.09688 | 23.2  |
| 801    | 2015 | 0.124 | 0.04 | 1.062306 | 1.1284943 | 22.28304 | 0.101768 | 47.61 |
| 600839 | 2015 | 0.07  | 0.04 | 1.062306 | 1.1284943 | 24.74173 | -0.09688 | 23.2  |
| 876    | 2015 | -0.12 | 0.04 | 1.062306 | 1.1284943 | 24.2848  | 0.122624 | 29.41 |
| 801    | 2015 | -0.07 | 0.04 | 1.062306 | 1.1284943 | 22.28304 | 0.101768 | 47.61 |
| 801    | 2015 | -0.16 | 0.04 | 1.062306 | 1.1284943 | 22.28304 | 0.101768 | 47.61 |
| 600839 | 2015 | 0.618 | 0.04 | 1.062306 | 1.1284943 | 24.74173 | -0.09688 | 23.2  |
| 600839 | 2015 | -0.15 | 0.04 | 1.062306 | 1.1284943 | 24.74173 | -0.09688 | 23.2  |
| 600139 | 2015 | -0.7  | 0.04 | 1.062306 | 1.1284943 | 22.80737 | -0.14086 | 40.46 |
| 600839 | 2015 | -0.5  | 0.04 | 1.062306 | 1.1284943 | 24.74173 | -0.09688 | 23.2  |
| 600839 | 2015 | 0.332 | 0.04 | 1.062306 | 1.1284943 | 24.74173 | -0.09688 | 23.2  |
| 600839 | 2015 | -0.4  | 0.04 | 1.062306 | 1.1284943 | 24.74173 | -0.09688 | 23.2  |
| 600839 | 2015 | 0.618 | 0.04 | 1.062306 | 1.1284943 | 24.74173 | -0.09688 | 23.2  |
| 600839 | 2015 | -0.68 | 0.04 | 1.062306 | 1.1284943 | 24.74173 | -0.09688 | 23.2  |
| 600139 | 2015 | -0.7  | 0.04 | 1.062306 | 1.1284943 | 21.83602 | -0.14086 | 40.46 |
| 801    | 2015 | 0.747 | 0.04 | 1.062306 | 1.1284943 | 21.44169 | 0.101768 | 47.61 |
| 600839 | 2015 | -0.24 | 0.04 | 1.062306 | 1.1284943 | 24.74173 | -0.09688 | 23.2  |
| 2258   | 2015 | 0.511 | 0.04 | 1.062306 | 1.1284943 | 21.66197 | 0.093301 | 27.26 |
| 876    | 2015 | -0.45 | 0.04 | 1.062306 | 1.1284943 | 24.2848  | 0.122624 | 29.41 |
| 801    | 2015 | 0.083 | 0.04 | 1.062306 | 1.1284943 | 22.28304 | 0.101768 | 47.61 |
| 600839 | 2015 | -0.52 | 0.04 | 1.062306 | 1.1284943 | 24.74173 | -0.09688 | 23.2  |
| 830    | 2015 | -0.13 | 0.05 | 1.038608 | 1.0787062 | 23.83084 | 0.036332 | 33.6  |
| 830    | 2015 | -0.44 | 0.05 | 1.038608 | 1.0787062 | 23.83084 | 0.036332 | 33.6  |
| 830    | 2015 | -0.13 | 0.05 | 1.038608 | 1.0787062 | 23.83084 | 0.036332 | 33.6  |
| 300121 | 2015 | 0.644 | 0.05 | 1.038608 | 1.0787062 | 20.93939 | 0.078775 | 45.26 |
| 423    | 2015 | -0.05 | 0.05 | 1.038608 | 1.0787062 | 22.87608 | 0.231231 | 23.14 |
| 957    | 2015 | -0.43 | 0.05 | 1.038608 | 1.0787062 | 22.67755 | 0.18533  | 23.06 |
| 423    | 2015 | 0.426 | 0.05 | 1.038608 | 1.0787062 | 22.87608 | 0.231231 | 23.14 |
| 423    | 2015 | -0.29 | 0.05 | 1.038608 | 1.0787062 | 22.87608 | 0.231231 | 23.14 |
| 830    | 2015 | -0.94 | 0.05 | 1.038608 | 1.0787062 | 23.83084 | 0.036332 | 33.6  |
| 423    | 2015 | -0.29 | 0.05 | 1.038608 | 1.0787062 | 22.87608 | 0.231231 | 23.14 |
| 423    | 2015 | -0.41 | 0.05 | 1.038608 | 1.0787062 | 22.87608 | 0.231231 | 23.14 |
| 300121 | 2015 | 0.644 | 0.05 | 1.038608 | 1.0787062 | 20.84668 | 0.078775 | 45.26 |
| 830    | 2015 | 0.38  | 0.05 | 1.038608 | 1.0787062 | 23.83084 | 0.036332 | 33.6  |
| 830    | 2015 | -0.13 | 0.05 | 1.038608 | 1.0787062 | 23.66035 | 0.036332 | 33.6  |
| 957    | 2015 | -0.16 | 0.05 | 1.038608 | 1.0787062 | 22.5978  | 0.18533  | 23.06 |
| 957    | 2015 | -0.42 | 0.05 | 1.038608 | 1.0787062 | 22.67755 | 0.18533  | 23.06 |
| 830    | 2015 | -0.94 | 0.05 | 1.038608 | 1.0787062 | 23.83084 | 0.036332 | 33.6  |
| 957    | 2015 | -0.45 | 0.05 | 1.038608 | 1.0787062 | 22.67755 | 0.18533  | 23.06 |
| 830    | 2015 | -0.44 | 0.05 | 1.038608 | 1.0787062 | 23.83084 | 0.036332 | 33.6  |
| 830    | 2015 | -0.5  | 0.05 | 1.038608 | 1.0787062 | 23.83084 | 0.036332 | 33.6  |
| 830    | 2015 | 0.38  | 0.05 | 1.038608 | 1.0787062 | 23.83084 | 0.036332 | 33.6  |
| 957    | 2015 | -0.65 | 0.05 | 1.038608 | 1.0787062 | 22.67755 | 0.18533  | 23.06 |
| 423    | 2015 | -0.07 | 0.05 | 1.038608 | 1.0787062 | 22.87608 | 0.231231 | 23.14 |
| 957    | 2015 | -0.42 | 0.05 | 1.038608 | 1.0787062 | 22.67755 | 0.18533  | 23.06 |
| 830    | 2015 | -0.4  | 0.05 | 1.038608 | 1.0787062 | 23.83084 | 0.036332 | 33.6  |
| 830    | 2015 | -0.13 | 0.05 | 1.038608 | 1.0787062 | 23.83084 | 0.036332 | 33.6  |
| 300121 | 2015 | -0.36 | 0.05 | 1.038608 | 1.0787062 | 20.93939 | 0.078775 | 45.26 |
| 830    | 2015 | -0.13 | 0.05 | 1.038608 | 1.0787062 | 23.83084 | 0.036332 | 33.6  |
| 830    | 2015 | -0.13 | 0.05 | 1.038608 | 1.0787062 | 23.83084 | 0.036332 | 33.6  |
| 423    | 2015 | -0.07 | 0.05 | 1.038608 | 1.0787062 | 22.87608 | 0.231231 | 23.14 |
| 830    | 2015 | -0.13 | 0.05 | 1.038608 | 1.0787062 | 23.83084 | 0.036332 | 33.6  |
| 830    | 2015 | -0.31 | 0.05 | 1.038608 | 1.0787062 | 23.83084 | 0.036332 | 33.6  |
| 423    | 2015 | 0.148 | 0.05 | 1.038608 | 1.0787062 | 22.82501 | 0.231231 | 23.14 |

|        |      |       |      |          |            |          |          |       |
|--------|------|-------|------|----------|------------|----------|----------|-------|
| 423    | 2015 | -0.09 | 0.05 | 1.038608 | 1.0787062  | 22.87608 | 0.231231 | 23.14 |
| 423    | 2015 | -0.24 | 0.05 | 1.038608 | 1.0787062  | 22.87608 | 0.231231 | 23.14 |
| 423    | 2015 | -0.07 | 0.05 | 1.038608 | 1.0787062  | 22.87608 | 0.231231 | 23.14 |
| 300121 | 2015 | 0.324 | 0.05 | 1.038608 | 1.0787062  | 20.93939 | 0.078775 | 45.26 |
| 300121 | 2015 | -0.36 | 0.05 | 1.038608 | 1.0787062  | 20.93939 | 0.078775 | 45.26 |
| 830    | 2015 | -0.13 | 0.05 | 1.038608 | 1.0787062  | 23.83084 | 0.036332 | 33.6  |
| 830    | 2015 | -0.31 | 0.05 | 1.038608 | 1.0787062  | 23.83084 | 0.036332 | 33.6  |
| 830    | 2015 | -0.36 | 0.05 | 1.038608 | 1.0787062  | 23.83084 | 0.036332 | 33.6  |
| 2715   | 2015 | 0.107 | 0.09 | 0.048607 | 0.00236267 | 20.3917  | -0.07251 | 12.91 |
| 300063 | 2015 | 0.617 | 0.09 | 0.048607 | 0.00236267 | 21.93265 | 0.020108 | 30.39 |
| 600866 | 2015 | 0.408 | 0.09 | 0.048607 | 0.00236267 | 21.4177  | -0.40298 | 14.94 |
| 300063 | 2015 | 0.617 | 0.09 | 0.048607 | 0.00236267 | 21.93265 | 0.020108 | 30.39 |
| 2715   | 2015 | 0.107 | 0.09 | 0.048607 | 0.00236267 | 20.38377 | -0.07251 | 12.91 |
| 300176 | 2015 | 0.109 | 0.09 | 0.048607 | 0.00236267 | 21.43252 | 0.063956 | 29.23 |
| 600866 | 2015 | 0.408 | 0.09 | 0.048607 | 0.00236267 | 21.33519 | -0.40298 | 14.94 |
| 300063 | 2015 | 0.617 | 0.09 | 0.048607 | 0.00236267 | 21.93265 | 0.020108 | 30.39 |
| 2715   | 2015 | 0.107 | 0.09 | 0.048607 | 0.00236267 | 20.3917  | -0.07251 | 12.91 |
| 636    | 2015 | 0.107 | 0.09 | 0.048607 | 0.00236267 | 22.60854 | 0.013541 | 20.03 |
| 636    | 2015 | 0.127 | 0.09 | 0.048607 | 0.00236267 | 22.60854 | 0.013541 | 20.03 |
| 636    | 2015 | 0.107 | 0.09 | 0.048607 | 0.00236267 | 22.60854 | 0.013541 | 20.03 |
| 636    | 2015 | -0.21 | 0.09 | 0.048607 | 0.00236267 | 22.60854 | 0.013541 | 20.03 |
| 300063 | 2015 | 0.617 | 0.09 | 0.048607 | 0.00236267 | 21.93265 | 0.020108 | 30.39 |
| 600866 | 2015 | 0.408 | 0.09 | 0.048607 | 0.00236267 | 21.33519 | -0.40298 | 14.94 |
| 300063 | 2015 | 0.617 | 0.09 | 0.048607 | 0.00236267 | 21.93265 | 0.020108 | 30.39 |
| 636    | 2015 | 0.107 | 0.09 | 0.048607 | 0.00236267 | 22.60854 | 0.013541 | 20.03 |
| 636    | 2015 | 0.465 | 0.09 | 0.048607 | 0.00236267 | 22.60854 | 0.013541 | 20.03 |
| 2101   | 2015 | 0.03  | 0.09 | 0.048607 | 0.00236267 | 21.73907 | 0.088355 | 16.72 |
| 300063 | 2015 | 0.617 | 0.09 | 0.048607 | 0.00236267 | 21.93265 | 0.020108 | 30.39 |
| 636    | 2015 | 0.107 | 0.09 | 0.048607 | 0.00236267 | 22.57068 | 0.013541 | 20.03 |
| 300176 | 2015 | 0.091 | 0.09 | 0.048607 | 0.00236267 | 21.27708 | 0.063956 | 29.23 |
| 2101   | 2015 | 0.349 | 0.09 | 0.048607 | 0.00236267 | 21.73907 | 0.088355 | 16.72 |
| 2101   | 2015 | 0.349 | 0.09 | 0.048607 | 0.00236267 | 21.73907 | 0.088355 | 16.72 |
| 2101   | 2015 | 0.19  | 0.09 | 0.048607 | 0.00236267 | 21.57921 | 0.088355 | 16.72 |
| 636    | 2015 | 0.127 | 0.09 | 0.048607 | 0.00236267 | 22.60854 | 0.013541 | 20.03 |
| 636    | 2015 | 0.021 | 0.09 | 0.048607 | 0.00236267 | 22.60854 | 0.013541 | 20.03 |
| 636    | 2015 | -0.63 | 0.09 | 0.048607 | 0.00236267 | 22.60854 | 0.013541 | 20.03 |
| 300176 | 2015 | 0.109 | 0.09 | 0.048607 | 0.00236267 | 21.43252 | 0.063956 | 29.23 |
| 300176 | 2015 | -0.01 | 0.09 | 0.048607 | 0.00236267 | 21.43252 | 0.063956 | 29.23 |
| 300063 | 2015 | 0.617 | 0.09 | 0.048607 | 0.00236267 | 21.93265 | 0.020108 | 30.39 |
| 300176 | 2015 | -0.01 | 0.09 | 0.048607 | 0.00236267 | 21.43252 | 0.063956 | 29.23 |
| 2101   | 2015 | 0.03  | 0.09 | 0.048607 | 0.00236267 | 21.73907 | 0.088355 | 16.72 |
| 300063 | 2015 | 0.617 | 0.09 | 0.048607 | 0.00236267 | 21.58898 | 0.020108 | 30.39 |
| 2272   | 2015 | -0.45 | 0.04 | 1.254689 | 1.5742441  | 21.27608 | -0.05886 | 21.01 |
| 600558 | 2015 | 0.183 | 0.04 | 1.254689 | 1.5742441  | 21.69694 | 0.037086 | 32.97 |
| 2630   | 2015 | -0.69 | 0.04 | 1.254689 | 1.5742441  | 22.93887 | 0.0695   | 21    |
| 2630   | 2015 | -0.5  | 0.04 | 1.254689 | 1.5742441  | 22.93887 | 0.0695   | 21    |
| 2272   | 2015 | -0.53 | 0.04 | 1.254689 | 1.5742441  | 21.27608 | -0.05886 | 21.01 |
| 600558 | 2015 | 0.33  | 0.04 | 1.254689 | 1.5742441  | 21.43708 | 0.037086 | 32.97 |
| 2272   | 2015 | -0.53 | 0.04 | 1.254689 | 1.5742441  | 21.27608 | -0.05886 | 21.01 |
| 600558 | 2015 | 0.046 | 0.04 | 1.254689 | 1.5742441  | 21.69694 | 0.037086 | 32.97 |
| 2630   | 2015 | -0.48 | 0.04 | 1.254689 | 1.5742441  | 22.82454 | 0.0695   | 21    |
| 2630   | 2015 | -0.47 | 0.04 | 1.254689 | 1.5742441  | 22.93887 | 0.0695   | 21    |
| 600558 | 2015 | 0.201 | 0.04 | 1.254689 | 1.5742441  | 21.69694 | 0.037086 | 32.97 |
| 2272   | 2015 | -0.53 | 0.04 | 1.254689 | 1.5742441  | 21.27608 | -0.05886 | 21.01 |

|        |      |       |      |          |            |          |          |       |
|--------|------|-------|------|----------|------------|----------|----------|-------|
| 2630   | 2015 | -0.25 | 0.04 | 1.254689 | 1.5742441  | 22.93887 | 0.0695   | 21    |
| 2272   | 2015 | -0.72 | 0.04 | 1.254689 | 1.5742441  | 20.93858 | -0.05886 | 21.01 |
| 2272   | 2015 | -0.53 | 0.04 | 1.254689 | 1.5742441  | 21.27608 | -0.05886 | 21.01 |
| 2630   | 2015 | -0.69 | 0.04 | 1.254689 | 1.5742441  | 22.93887 | 0.0695   | 21    |
| 600558 | 2015 | 0.33  | 0.04 | 1.254689 | 1.5742441  | 21.69694 | 0.037086 | 32.97 |
| 600558 | 2015 | 0.046 | 0.04 | 1.254689 | 1.5742441  | 21.69694 | 0.037086 | 32.97 |
| 600558 | 2015 | -0.05 | 0.04 | 1.254689 | 1.5742441  | 21.69694 | 0.037086 | 32.97 |
| 2630   | 2015 | -0.48 | 0.04 | 1.254689 | 1.5742441  | 22.93887 | 0.0695   | 21    |
| 2630   | 2015 | -0.69 | 0.04 | 1.254689 | 1.5742441  | 22.93887 | 0.0695   | 21    |
| 2272   | 2015 | -0.53 | 0.04 | 1.254689 | 1.5742441  | 21.27608 | -0.05886 | 21.01 |
| 600232 | 2015 | -0.72 | 0.12 | 0.06955  | 0.00483725 | 21.23172 | 0.026423 | 46.87 |
| 600232 | 2015 | -0.72 | 0.12 | 0.06955  | 0.00483725 | 21.10541 | 0.026423 | 46.87 |
| 600232 | 2015 | -0.72 | 0.12 | 0.06955  | 0.00483725 | 21.23172 | 0.026423 | 46.87 |
| 600232 | 2015 | -0.72 | 0.12 | 0.06955  | 0.00483725 | 21.23172 | 0.026423 | 46.87 |
| 600232 | 2015 | -0.72 | 0.12 | 0.06955  | 0.00483725 | 21.23172 | 0.026423 | 46.87 |
| 600232 | 2015 | -0.72 | 0.12 | 0.06955  | 0.00483725 | 21.23172 | 0.026423 | 46.87 |
| 153    | 2015 | 0.324 | 0.09 | 1.366813 | 1.8681773  | 21.55847 | 0.001877 | 11.48 |
| 2298   | 2015 | 0.357 | 0.09 | 1.366813 | 1.8681773  | 22.35162 | 0.024981 | 20.13 |
| 2171   | 2015 | -0.21 | 0.09 | 1.366813 | 1.8681773  | 21.50263 | 0.044374 | 49.51 |
| 2171   | 2015 | 0.128 | 0.09 | 1.366813 | 1.8681773  | 21.50263 | 0.044374 | 49.51 |
| 2171   | 2015 | -0.69 | 0.09 | 1.366813 | 1.8681773  | 21.76603 | 0.044374 | 49.51 |
| 300088 | 2015 | -0.75 | 0.09 | 1.366813 | 1.8681773  | 22.30017 | 0.067131 | 18.89 |
| 619    | 2015 | -0.24 | 0.09 | 1.366813 | 1.8681773  | 22.08662 | 0.044403 | 30.63 |
| 300088 | 2015 | 0.267 | 0.09 | 1.366813 | 1.8681773  | 22.30017 | 0.067131 | 18.89 |
| 619    | 2015 | -0.38 | 0.09 | 1.366813 | 1.8681773  | 22.08662 | 0.044403 | 30.63 |
| 2171   | 2015 | 0.497 | 0.09 | 1.366813 | 1.8681773  | 21.50263 | 0.044374 | 49.51 |
| 300088 | 2015 | 0.267 | 0.09 | 1.366813 | 1.8681773  | 22.30017 | 0.067131 | 18.89 |
| 153    | 2015 | 0.476 | 0.09 | 1.366813 | 1.8681773  | 21.55847 | 0.001877 | 11.48 |
| 153    | 2015 | 0.324 | 0.09 | 1.366813 | 1.8681773  | 21.55847 | 0.026572 | 11.48 |
| 2361   | 2015 | 0.23  | 0.09 | 1.366813 | 1.8681773  | 21.5768  | 0.067813 | 26.49 |
| 619    | 2015 | -0.24 | 0.09 | 1.366813 | 1.8681773  | 22.08662 | 0.044403 | 30.63 |
| 300088 | 2015 | -0.75 | 0.09 | 1.366813 | 1.8681773  | 22.30017 | 0.067131 | 18.89 |
| 2298   | 2015 | 0.101 | 0.09 | 1.366813 | 1.8681773  | 22.23191 | 0.024981 | 20.13 |
| 153    | 2015 | 0.201 | 0.09 | 1.366813 | 1.8681773  | 21.55847 | 0.001877 | 11.48 |
| 2361   | 2015 | -0.52 | 0.09 | 1.366813 | 1.8681773  | 21.5768  | 0.067813 | 26.49 |
| 2555   | 2015 | 0.53  | 0.09 | 1.366813 | 1.8681773  | 22.25438 | 0.248385 | 23.01 |
| 2298   | 2015 | 0.357 | 0.09 | 1.366813 | 1.8681773  | 22.23191 | 0.024981 | 20.13 |
| 2361   | 2015 | -0.52 | 0.09 | 1.366813 | 1.8681773  | 21.5768  | 0.067813 | 26.49 |
| 2171   | 2015 | -0.25 | 0.09 | 1.366813 | 1.8681773  | 21.50263 | 0.044374 | 49.51 |
| 2171   | 2015 | -0.69 | 0.09 | 1.366813 | 1.8681773  | 21.50263 | 0.044374 | 49.51 |
| 300088 | 2015 | -0.75 | 0.09 | 1.366813 | 1.8681773  | 22.30017 | 0.067131 | 18.89 |
| 2298   | 2015 | -0.17 | 0.09 | 1.366813 | 1.8681773  | 22.23191 | 0.024981 | 20.13 |
| 300088 | 2015 | -0.21 | 0.09 | 1.366813 | 1.8681773  | 22.15517 | 0.067131 | 18.89 |
| 619    | 2015 | -0.58 | 0.09 | 1.366813 | 1.8681773  | 21.85523 | 0.044403 | 30.63 |
| 2171   | 2015 | 0.306 | 0.09 | 1.366813 | 1.8681773  | 21.50263 | 0.044374 | 49.51 |
| 153    | 2015 | 0.476 | 0.09 | 1.366813 | 1.8681773  | 21.55847 | 0.001877 | 11.48 |
| 2361   | 2015 | -0.52 | 0.09 | 1.366813 | 1.8681773  | 21.50882 | 0.067813 | 26.49 |
| 619    | 2015 | -0.24 | 0.09 | 1.366813 | 1.8681773  | 22.08662 | 0.044403 | 30.63 |
| 2298   | 2015 | -0.1  | 0.09 | 1.366813 | 1.8681773  | 22.23191 | 0.024981 | 20.13 |
| 2298   | 2015 | -0.17 | 0.09 | 1.366813 | 1.8681773  | 22.23191 | 0.024981 | 20.13 |
| 2361   | 2015 | -0.52 | 0.09 | 1.366813 | 1.8681773  | 21.5768  | 0.067813 | 26.49 |
| 600255 | 2015 | -0.15 | 0.09 | 1.366813 | 1.8681773  | 22.32455 | 0.012436 | 13.85 |
| 619    | 2015 | -0.61 | 0.09 | 1.366813 | 1.8681773  | 22.08662 | 0.044403 | 30.63 |
| 153    | 2015 | 0.201 | 0.09 | 1.366813 | 1.8681773  | 21.55847 | 0.001877 | 11.48 |

|        |      |       |      |          |           |          |          |       |
|--------|------|-------|------|----------|-----------|----------|----------|-------|
| 600255 | 2015 | -0.15 | 0.09 | 1.366813 | 1.8681773 | 22.32455 | 0.012436 | 13.85 |
| 2361   | 2015 | 0.23  | 0.09 | 1.366813 | 1.8681773 | 21.5768  | 0.067813 | 26.49 |
| 2171   | 2015 | 0.06  | 0.09 | 1.366813 | 1.8681773 | 21.50263 | 0.044374 | 49.51 |
| 600255 | 2015 | -0.15 | 0.09 | 1.366813 | 1.8681773 | 22.32455 | 0.012436 | 13.85 |
| 2361   | 2015 | 0.194 | 0.09 | 1.366813 | 1.8681773 | 21.5768  | 0.067813 | 26.49 |
| 619    | 2015 | -0.73 | 0.09 | 1.366813 | 1.8681773 | 22.08662 | 0.044403 | 30.63 |
| 600255 | 2015 | -0.15 | 0.09 | 1.366813 | 1.8681773 | 22.15289 | 0.012436 | 13.85 |
| 2298   | 2015 | -0.42 | 0.09 | 1.366813 | 1.8681773 | 22.23191 | 0.024981 | 20.13 |
| 300088 | 2015 | -0.75 | 0.09 | 1.366813 | 1.8681773 | 22.30017 | 0.067131 | 18.89 |
| 2298   | 2015 | -0.42 | 0.09 | 1.366813 | 1.8681773 | 22.23191 | 0.024981 | 20.13 |
| 2171   | 2015 | -0.2  | 0.09 | 1.366813 | 1.8681773 | 21.50263 | 0.044374 | 49.51 |
| 2298   | 2015 | 0.113 | 0.09 | 1.366813 | 1.8681773 | 22.23191 | 0.024981 | 20.13 |
| 2555   | 2015 | 0.53  | 0.09 | 1.366813 | 1.8681773 | 22.25438 | 0.248385 | 23.01 |
| 2298   | 2015 | -0.15 | 0.09 | 1.366813 | 1.8681773 | 22.23191 | 0.024981 | 20.13 |
| 2298   | 2015 | -0.09 | 0.09 | 1.366813 | 1.8681773 | 22.23191 | 0.024981 | 20.13 |
| 153    | 2015 | 0.201 | 0.09 | 1.366813 | 1.8681773 | 21.39806 | 0.001877 | 11.48 |
| 2555   | 2015 | 0.53  | 0.09 | 1.366813 | 1.8681773 | 22.49756 | 0.248385 | 23.01 |
| 2171   | 2015 | -0.18 | 0.09 | 1.366813 | 1.8681773 | 21.50263 | 0.044374 | 49.51 |
| 2298   | 2015 | -0.18 | 0.09 | 1.366813 | 1.8681773 | 22.23191 | 0.024981 | 20.13 |
| 600255 | 2015 | -0.15 | 0.09 | 1.366813 | 1.8681773 | 22.32455 | 0.012436 | 13.85 |
| 2384   | 2015 | 0.018 | 0.09 | 1.292804 | 1.6713413 | 22.65659 | 0.014507 | 23.26 |
| 2172   | 2015 | -0.7  | 0.09 | 1.292804 | 1.6713413 | 21.1604  | 0.090449 | 51.83 |
| 2081   | 2015 | -0.34 | 0.09 | 1.292804 | 1.6713413 | 23.93431 | 0.183584 | 24.7  |
| 2426   | 2015 | -0.06 | 0.09 | 1.292804 | 1.6713413 | 23.14873 | 0.051739 | 30.92 |
| 600200 | 2015 | 0.479 | 0.09 | 1.292804 | 1.6713413 | 22.16841 | 0.037004 | 18.34 |
| 300390 | 2015 | 0.282 | 0.09 | 1.292804 | 1.6713413 | 20.58775 | 0.05917  | 34.75 |
| 300342 | 2015 | 0.384 | 0.09 | 1.292804 | 1.6713413 | 20.77293 | 0.140934 | 50.06 |
| 600105 | 2015 | -0.28 | 0.09 | 1.292804 | 1.6713413 | 21.94135 | 0.087729 | 37.19 |
| 2255   | 2015 | -0.35 | 0.09 | 1.292804 | 1.6713413 | 22.02138 | 0.044513 | 20.67 |
| 300325 | 2015 | 0.447 | 0.09 | 1.292804 | 1.6713413 | 21.48768 | 0.076175 | 32.9  |
| 300325 | 2015 | 0.447 | 0.09 | 1.292804 | 1.6713413 | 21.48768 | 0.076175 | 32.9  |
| 2160   | 2015 | -0.55 | 0.09 | 1.292804 | 1.6713413 | 22.27332 | 0.050197 | 24.96 |
| 2531   | 2015 | 0.316 | 0.09 | 1.292804 | 1.6713413 | 22.25867 | 0.131384 | 35.8  |
| 2367   | 2015 | 0.037 | 0.09 | 1.292804 | 1.6713413 | 22.12173 | 0.207089 | 48.07 |
| 2245   | 2015 | -0.14 | 0.09 | 1.292804 | 1.6713413 | 21.17973 | 0.145842 | 33.61 |
| 2514   | 2015 | -0.24 | 0.09 | 1.292804 | 1.6713413 | 21.0651  | 0.033597 | 25.91 |
| 2547   | 2015 | -0.53 | 0.09 | 1.292804 | 1.6713413 | 21.75283 | 0.097231 | 42.96 |
| 601700 | 2015 | -0.06 | 0.09 | 1.292804 | 1.6713413 | 22.09924 | 0.07191  | 29.24 |
| 300211 | 2015 | -0.41 | 0.09 | 1.292804 | 1.6713413 | 20.20405 | 0.023545 | 48.4  |
| 2079   | 2015 | 0.057 | 0.09 | 1.292804 | 1.6713413 | 21.12178 | 0.014478 | 34.28 |
| 2150   | 2015 | -0.8  | 0.09 | 1.292804 | 1.6713413 | 20.6226  | 0.11041  | 42    |
| 2290   | 2015 | 0.182 | 0.09 | 1.292804 | 1.6713413 | 21.01247 | 0.033802 | 29.8  |
| 2290   | 2015 | -0.35 | 0.09 | 1.292804 | 1.6713413 | 21.01247 | 0.033802 | 29.8  |
| 2450   | 2015 | 0.214 | 0.09 | 1.292804 | 1.6713413 | 23.63388 | 0.152466 | 15.28 |
| 601599 | 2015 | -0.81 | 0.09 | 1.292804 | 1.6713413 | 21.74002 | 0.077654 | 16.35 |
| 2333   | 2015 | -0.47 | 0.09 | 1.292804 | 1.6713413 | 21.20921 | 0.140237 | 65.46 |
| 2519   | 2015 | -0.17 | 0.09 | 1.292804 | 1.6713413 | 21.92977 | 0.127108 | 34.67 |
| 300390 | 2015 | -0.14 | 0.09 | 1.292804 | 1.6713413 | 20.69318 | 0.05917  | 34.75 |
| 2172   | 2015 | -0.7  | 0.09 | 1.292804 | 1.6713413 | 22.02503 | 0.090449 | 51.83 |
| 2367   | 2015 | -0.64 | 0.09 | 1.292804 | 1.6713413 | 22.12173 | 0.207089 | 48.07 |
| 603699 | 2015 | -0.45 | 0.09 | 1.292804 | 1.6713413 | 22.09991 | 0.138203 | 53.15 |
| 300013 | 2015 | -0.72 | 0.09 | 1.292804 | 1.6713413 | 21.26448 | -0.0905  | 14.19 |
| 600527 | 2015 | -0.01 | 0.09 | 1.292804 | 1.6713413 | 21.22015 | -0.01087 | 11.83 |
| 777    | 2015 | 0.059 | 0.09 | 1.292804 | 1.6713413 | 21.36587 | 0.0712   | 17.92 |

|        |      |       |      |          |           |          |          |       |
|--------|------|-------|------|----------|-----------|----------|----------|-------|
| 2091   | 2015 | 0.52  | 0.09 | 1.292804 | 1.6713413 | 22.04359 | 0.135031 | 30.4  |
| 300215 | 2015 | -0.02 | 0.09 | 1.292804 | 1.6713413 | 22.06387 | 0.019583 | 31.52 |
| 2309   | 2015 | -0.14 | 0.09 | 1.292804 | 1.6713413 | 22.99006 | 0.092861 | 46.67 |
| 600200 | 2015 | 0.479 | 0.09 | 1.292804 | 1.6713413 | 22.16841 | 0.037004 | 18.34 |
| 2309   | 2015 | -0.46 | 0.09 | 1.292804 | 1.6713413 | 22.99006 | 0.092861 | 46.67 |
| 2091   | 2015 | 0.478 | 0.09 | 1.292804 | 1.6713413 | 21.84291 | 0.135031 | 30.4  |
| 2426   | 2015 | -0    | 0.09 | 1.292804 | 1.6713413 | 23.14873 | 0.051739 | 30.92 |
| 2089   | 2015 | 0.994 | 0.09 | 1.292804 | 1.67E+00  | 22.30841 | 0.079015 | 18.05 |
| 2547   | 2015 | -0.3  | 0.09 | 1.292804 | 1.67E+00  | 21.97949 | 0.097231 | 42.96 |
| 300393 | 2015 | -0.42 | 0.09 | 1.292804 | 1.67E+00  | 20.96118 | 0.121952 | 32.23 |
| 603017 | 2015 | 0.053 | 0.09 | 1.292804 | 1.67E+00  | 21.41793 | 0.078308 | 41.46 |
| 777    | 2015 | -0.32 | 0.09 | 1.292804 | 1.67E+00  | 21.36587 | 0.0712   | 17.92 |
| 2081   | 2015 | -0.21 | 0.09 | 1.292804 | 1.67E+00  | 23.93431 | 0.183584 | 24.7  |
| 551    | 2015 | -0.1  | 0.09 | 1.292804 | 1.6713413 | 20.8947  | 0.036164 | 34.33 |
| 2309   | 2015 | -0.11 | 0.09 | 1.292804 | 1.6713413 | 23.78421 | 0.092861 | 46.67 |
| 300261 | 2015 | 0.8   | 0.09 | 1.292804 | 1.6713413 | 21.17991 | 0.08273  | 45.07 |
| 2547   | 2015 | -0.51 | 0.09 | 1.292804 | 1.6713413 | 21.97949 | 0.097231 | 42.96 |
| 2491   | 2015 | -0.03 | 0.09 | 1.292804 | 1.6713413 | 22.30308 | 0.095457 | 45.02 |
| 551    | 2015 | -0.27 | 0.09 | 1.292804 | 1.6713413 | 20.8947  | 0.036164 | 34.33 |
| 551    | 2015 | -0.09 | 0.09 | 1.292804 | 1.6713413 | 20.8947  | 0.036164 | 34.33 |
| 300325 | 2015 | 0.618 | 0.09 | 1.292804 | 1.6713413 | 21.33222 | 0.076175 | 32.9  |
| 600105 | 2015 | -0.04 | 0.09 | 1.292804 | 1.6713413 | 21.94135 | 0.087729 | 37.19 |
| 300228 | 2015 | -0.37 | 0.09 | 1.292804 | 1.6713413 | 22.07034 | 0.005957 | 11.74 |
| 2089   | 2015 | 1.01  | 0.09 | 1.292804 | 1.6713413 | 22.30841 | 0.079015 | 18.05 |
| 603699 | 2015 | -0.6  | 0.09 | 1.292804 | 1.6713413 | 22.09991 | 0.138203 | 53.15 |
| 300390 | 2015 | 0.358 | 0.09 | 1.292804 | 1.6713413 | 20.69318 | 0.05917  | 34.75 |
| 600487 | 2015 | -0.3  | 0.09 | 1.292804 | 1.6713413 | 23.46296 | 0.130637 | 19.34 |
| 600487 | 2015 | 0.009 | 0.09 | 1.292804 | 1.6713413 | 23.46296 | 0.130637 | 19.34 |
| 600487 | 2015 | -0.04 | 0.09 | 1.292804 | 1.6713413 | 23.46296 | 0.130637 | 19.34 |
| 600487 | 2015 | 0.111 | 0.09 | 1.292804 | 1.6713413 | 23.46296 | 0.130637 | 19.34 |
| 600487 | 2015 | -0.61 | 0.09 | 1.292804 | 1.6713413 | 23.46296 | 0.130637 | 19.34 |
| 2547   | 2015 | -0.62 | 0.09 | 1.292804 | 1.6713413 | 21.97949 | 0.097231 | 42.96 |
| 600487 | 2015 | 0.718 | 0.09 | 1.292804 | 1.6713413 | 23.46296 | 0.130637 | 19.34 |
| 2652   | 2015 | -0.41 | 0.09 | 1.292804 | 1.6713413 | 21.31555 | 0.101313 | 37.5  |
| 601599 | 2015 | -0.33 | 0.09 | 1.292804 | 1.6713413 | 21.97742 | 0.077654 | 16.35 |
| 2384   | 2015 | -0.63 | 0.09 | 1.292804 | 1.6713413 | 22.65659 | 0.014507 | 23.26 |
| 551    | 2015 | -0.11 | 0.09 | 1.292804 | 1.6713413 | 21.92269 | 0.036164 | 34.33 |
| 2245   | 2015 | -0.02 | 0.09 | 1.292804 | 1.6713413 | 21.17973 | 0.145842 | 33.61 |
| 551    | 2015 | -0.2  | 0.09 | 1.292804 | 1.6713413 | 20.8947  | 0.036164 | 34.33 |
| 600487 | 2015 | 0.058 | 0.09 | 1.292804 | 1.6713413 | 23.46296 | 0.130637 | 19.34 |
| 2245   | 2015 | -0.62 | 0.09 | 1.292804 | 1.6713413 | 21.17973 | 0.145842 | 33.61 |
| 2463   | 2015 | 0.299 | 0.09 | 1.292804 | 1.6713413 | 22.41623 | 0.001716 | 23.88 |
| 300382 | 2015 | 0.468 | 0.09 | 1.292804 | 1.6713413 | 20.47556 | 0.145443 | 69.36 |
| 600487 | 2015 | 0.133 | 0.09 | 1.292804 | 1.6713413 | 23.46296 | 0.130637 | 19.34 |
| 2491   | 2015 | 0.593 | 0.09 | 1.292804 | 1.6713413 | 22.49474 | 0.095457 | 45.02 |
| 300382 | 2015 | -0.13 | 0.09 | 1.292804 | 1.6713413 | 20.54222 | 0.145443 | 69.36 |
| 600487 | 2015 | -0.29 | 0.09 | 1.292804 | 1.6713413 | 23.46296 | 0.130637 | 19.34 |
| 2255   | 2015 | -0.32 | 0.09 | 1.292804 | 1.6713413 | 22.02138 | 0.044513 | 20.67 |
| 600487 | 2015 | 0.375 | 0.09 | 1.292804 | 1.6713413 | 23.46296 | 0.130637 | 19.34 |
| 2255   | 2015 | -0.08 | 0.09 | 1.292804 | 1.6713413 | 22.02138 | 0.044513 | 20.67 |
| 600105 | 2015 | 0.749 | 0.09 | 1.292804 | 1.6713413 | 21.94135 | 0.087729 | 37.19 |
| 300393 | 2015 | -0.2  | 0.09 | 1.292804 | 1.6713413 | 21.19212 | 0.121952 | 32.23 |
| 2245   | 2015 | -0.43 | 0.09 | 1.292804 | 1.6713413 | 21.17973 | 0.145842 | 33.61 |
| 300292 | 2015 | 0.266 | 0.09 | 1.292804 | 1.6713413 | 21.84094 | 0.069953 | 31.37 |

|        |      |       |      |          |           |          |          |       |
|--------|------|-------|------|----------|-----------|----------|----------|-------|
| 300325 | 2015 | 0.533 | 0.09 | 1.292804 | 1.6713413 | 21.48768 | 0.076175 | 32.9  |
| 300128 | 2015 | 0.021 | 0.09 | 1.292804 | 1.6713413 | 21.9216  | 0.014952 | 19.51 |
| 300228 | 2015 | -0.29 | 0.09 | 1.292804 | 1.6713413 | 22.07034 | 0.005957 | 11.74 |
| 300342 | 2015 | 0.384 | 0.09 | 1.292804 | 1.6713413 | 20.77293 | 0.140934 | 50.06 |
| 300228 | 2015 | 0.004 | 0.09 | 1.292804 | 1.6713413 | 22.07034 | 0.005957 | 11.74 |
| 2160   | 2015 | -0.33 | 0.09 | 1.292804 | 1.6713413 | 22.27332 | 0.050197 | 24.96 |
| 2079   | 2015 | 0.17  | 0.09 | 1.292804 | 1.6713413 | 21.12178 | 0.014478 | 34.28 |
| 2091   | 2015 | 0.593 | 0.09 | 1.292804 | 1.6713413 | 22.04359 | 0.135031 | 30.4  |
| 551    | 2015 | -0.11 | 0.09 | 1.292804 | 1.6713413 | 20.8947  | 0.036164 | 34.33 |
| 2160   | 2015 | 0.102 | 0.09 | 1.292804 | 1.6713413 | 22.27332 | 0.050197 | 24.96 |
| 2367   | 2015 | 0.017 | 0.09 | 1.292804 | 1.6713413 | 21.96302 | 0.207089 | 48.07 |
| 2333   | 2015 | -0.1  | 0.09 | 1.292804 | 1.6713413 | 21.20921 | 0.140237 | 65.46 |
| 2519   | 2015 | 0.042 | 0.09 | 1.292804 | 1.6713413 | 21.99787 | 0.127108 | 34.67 |
| 2245   | 2015 | -0.62 | 0.09 | 1.292804 | 1.6713413 | 21.17973 | 0.145842 | 33.61 |
| 300013 | 2015 | 0.168 | 0.09 | 1.292804 | 1.6713413 | 21.26448 | -0.0905  | 14.19 |
| 2367   | 2015 | 0.037 | 0.09 | 1.292804 | 1.6713413 | 22.12173 | 0.207089 | 48.07 |
| 2290   | 2015 | 0.359 | 0.09 | 1.292804 | 1.6713413 | 20.95996 | 0.033802 | 29.8  |
| 777    | 2015 | -0.32 | 0.09 | 1.292804 | 1.6713413 | 21.36587 | 0.0712   | 17.92 |
| 600105 | 2015 | -0.2  | 0.09 | 1.292804 | 1.6713413 | 21.94135 | 0.087729 | 37.19 |
| 600105 | 2015 | -0.58 | 0.09 | 1.292804 | 1.6713413 | 21.94135 | 0.087729 | 37.19 |
| 300346 | 2015 | 1.323 | 0.09 | 1.292804 | 1.6713413 | 20.9852  | 0.03677  | 19.95 |
| 300393 | 2015 | -0.42 | 0.09 | 1.292804 | 1.6713413 | 21.19212 | 0.121952 | 32.23 |
| 2367   | 2015 | -0    | 0.09 | 1.292804 | 1.6713413 | 22.12173 | 0.207089 | 48.07 |
| 603699 | 2015 | 0.105 | 0.09 | 1.292804 | 1.6713413 | 22.09991 | 0.138203 | 53.15 |
| 2081   | 2015 | -0.11 | 0.09 | 1.292804 | 1.6713413 | 23.93431 | 0.183584 | 24.7  |
| 2384   | 2015 | -0.26 | 0.09 | 1.292804 | 1.6713413 | 22.65659 | 0.014507 | 23.26 |
| 2309   | 2015 | -0.28 | 0.09 | 1.292804 | 1.6713413 | 22.99006 | 0.092861 | 46.67 |
| 601599 | 2015 | -0.96 | 0.09 | 1.292804 | 1.6713413 | 21.97742 | 0.077654 | 16.35 |
| 2075   | 2015 | -0.87 | 0.09 | 1.292804 | 1.6713413 | 22.60274 | -0.03193 | 19.88 |
| 2426   | 2015 | -0.28 | 0.09 | 1.292804 | 1.6713413 | 23.14873 | 0.051739 | 30.92 |
| 2290   | 2015 | 0.315 | 0.09 | 1.292804 | 1.6713413 | 21.01247 | 0.033802 | 29.8  |
| 2450   | 2015 | 0.214 | 0.09 | 1.292804 | 1.6713413 | 23.63388 | 0.152466 | 15.28 |
| 2309   | 2015 | -0.62 | 0.09 | 1.292804 | 1.6713413 | 22.99006 | 0.092861 | 46.67 |
| 2160   | 2015 | 0.102 | 0.09 | 1.292804 | 1.6713413 | 22.27332 | 0.050197 | 24.96 |
| 2450   | 2015 | 0.658 | 0.09 | 1.292804 | 1.6713413 | 23.63388 | 0.152466 | 15.28 |
| 2491   | 2015 | -0.46 | 0.09 | 1.292804 | 1.6713413 | 22.49474 | 0.095457 | 45.02 |
| 601700 | 2015 | -0.16 | 0.09 | 1.292804 | 1.6713413 | 22.09924 | 0.07191  | 29.24 |
| 551    | 2015 | -0.04 | 0.09 | 1.292804 | 1.6713413 | 20.8947  | 0.036164 | 34.33 |
| 300382 | 2015 | 0.081 | 0.09 | 1.292804 | 1.6713413 | 20.54222 | 0.145443 | 69.36 |
| 2450   | 2015 | 0.773 | 0.09 | 1.292804 | 1.6713413 | 23.63388 | 0.152466 | 15.28 |
| 600200 | 2015 | 0.479 | 0.09 | 1.292804 | 1.6713413 | 22.16841 | 0.037004 | 18.34 |
| 600487 | 2015 | -0.42 | 0.09 | 1.292804 | 1.6713413 | 23.46296 | 0.130637 | 19.34 |
| 300292 | 2015 | -0.37 | 0.09 | 1.292804 | 1.6713413 | 21.84094 | 0.069953 | 31.37 |
| 2081   | 2015 | 0.032 | 0.09 | 1.292804 | 1.6713413 | 23.93431 | 0.183584 | 24.7  |
| 2091   | 2015 | 0.546 | 0.09 | 1.292804 | 1.6713413 | 22.04359 | 0.135031 | 30.4  |
| 2631   | 2015 | -0.05 | 0.09 | 1.292804 | 1.6713413 | 21.29865 | 0.082941 | 54.95 |
| 2514   | 2015 | -0.41 | 0.09 | 1.292804 | 1.6713413 | 21.0651  | 0.033597 | 25.91 |
| 2245   | 2015 | -0.07 | 0.09 | 1.292804 | 1.6713413 | 21.17973 | 0.145842 | 33.61 |
| 2387   | 2015 | -0.92 | 0.09 | 1.292804 | 1.6713413 | 20.92775 | -0.4336  | 32.56 |
| 300346 | 2015 | 1.323 | 0.09 | 1.292804 | 1.6713413 | 20.9852  | 0.03677  | 19.95 |
| 2150   | 2015 | -0.8  | 0.09 | 1.292804 | 1.6713413 | 20.6226  | 0.11041  | 42    |
| 600487 | 2015 | -0.07 | 0.09 | 1.292804 | 1.6713413 | 22.92802 | 0.130637 | 19.34 |
| 2387   | 2015 | -0.92 | 0.09 | 1.292804 | 1.6713413 | 20.90514 | -0.4336  | 32.56 |
| 300393 | 2015 | -0.2  | 0.09 | 1.292804 | 1.6713413 | 21.19212 | 0.121952 | 32.23 |

|        |      |       |      |          |           |          |          |       |
|--------|------|-------|------|----------|-----------|----------|----------|-------|
| 2652   | 2015 | -0.71 | 0.09 | 1.292804 | 1.6713413 | 21.31555 | 0.101313 | 37.5  |
| 601599 | 2015 | -0.33 | 0.09 | 1.292804 | 1.6713413 | 21.97742 | 0.077654 | 16.35 |
| 2384   | 2015 | 0.004 | 0.09 | 1.292804 | 1.6713413 | 22.65659 | 0.014507 | 23.26 |
| 2635   | 2015 | 0.014 | 0.09 | 1.292804 | 1.6713413 | 21.85069 | 0.129408 | 35.31 |
| 2547   | 2015 | -0.62 | 0.09 | 1.292804 | 1.6713413 | 21.97949 | 0.097231 | 42.96 |
| 300128 | 2015 | 0.021 | 0.09 | 1.292804 | 1.6713413 | 21.9216  | 0.014952 | 19.51 |
| 300128 | 2015 | 0.021 | 0.09 | 1.292804 | 1.6713413 | 21.9216  | 0.014952 | 19.51 |
| 2631   | 2015 | -0.35 | 0.09 | 1.292804 | 1.6713413 | 21.30268 | 0.082941 | 54.95 |
| 300013 | 2015 | 0.168 | 0.09 | 1.292804 | 1.6713413 | 21.26448 | -0.0905  | 14.19 |
| 601700 | 2015 | 0.076 | 0.09 | 1.292804 | 1.6713413 | 22.09924 | 0.07191  | 29.24 |
| 2426   | 2015 | 0.098 | 0.09 | 1.292804 | 1.6713413 | 23.14873 | 0.051739 | 30.92 |
| 600487 | 2015 | -0.61 | 0.09 | 1.292804 | 1.6713413 | 23.46296 | 0.130637 | 19.34 |
| 600105 | 2015 | -0.28 | 0.09 | 1.292804 | 1.6713413 | 21.84762 | 0.087729 | 37.19 |
| 300260 | 2015 | -0.07 | 0.09 | 1.292804 | 1.6713413 | 20.73801 | -0.00332 | 28.38 |
| 2426   | 2015 | -0    | 0.09 | 1.292804 | 1.6713413 | 23.14873 | 0.051739 | 30.92 |
| 2426   | 2015 | -0.33 | 0.09 | 1.292804 | 1.6713413 | 23.14873 | 0.051739 | 30.92 |
| 2635   | 2015 | 0.014 | 0.09 | 1.292804 | 1.67E+00  | 21.85069 | 0.129408 | 35.31 |
| 300292 | 2015 | -0.37 | 0.09 | 1.292804 | 1.67E+00  | 21.84094 | 0.069953 | 31.37 |
| 300215 | 2015 | 0.525 | 0.09 | 1.292804 | 1.67E+00  | 22.06387 | 0.019583 | 31.52 |
| 603017 | 2015 | -0.04 | 0.09 | 1.292804 | 1.67E+00  | 21.26455 | 0.078308 | 41.46 |
| 2290   | 2015 | 0.315 | 0.09 | 1.292804 | 1.67E+00  | 21.01247 | 0.033802 | 29.8  |
| 2309   | 2015 | 0.001 | 0.09 | 1.292804 | 1.67E+00  | 22.99006 | 0.092861 | 46.67 |
| 300215 | 2015 | -0.34 | 0.09 | 1.292804 | 1.67E+00  | 22.06387 | 0.019583 | 31.52 |
| 551    | 2015 | -0.11 | 0.09 | 1.292804 | 1.6713413 | 20.8947  | 0.036164 | 34.33 |
| 2309   | 2015 | -0.08 | 0.09 | 1.292804 | 1.6713413 | 22.99006 | 0.092861 | 46.67 |
| 2245   | 2015 | -0.05 | 0.09 | 1.292804 | 1.6713413 | 21.17973 | 0.145842 | 33.61 |
| 2079   | 2015 | 0.057 | 0.09 | 1.292804 | 1.6713413 | 21.12178 | 0.014478 | 34.28 |
| 2081   | 2015 | -0.45 | 0.09 | 1.292804 | 1.6713413 | 23.93431 | 0.183584 | 24.7  |
| 2499   | 2015 | -0.48 | 0.09 | 1.292804 | 1.6713413 | 20.66332 | 0.036341 | 19.02 |
| 2450   | 2015 | 0.658 | 0.09 | 1.292804 | 1.6713413 | 23.63388 | 0.152466 | 15.28 |
| 300013 | 2015 | -0.37 | 0.09 | 1.292804 | 1.6713413 | 21.26448 | -0.0905  | 14.19 |
| 300165 | 2015 | 0.221 | 0.09 | 1.292804 | 1.6713413 | 21.263   | 0.0293   | 40.08 |
| 300292 | 2015 | -0.21 | 0.09 | 1.292804 | 1.6713413 | 21.84094 | 0.069953 | 31.37 |
| 2499   | 2015 | -0.51 | 0.09 | 1.292804 | 1.6713413 | 20.7479  | 0.036341 | 19.02 |
| 600487 | 2015 | -0.13 | 0.09 | 1.292804 | 1.6713413 | 23.46296 | 0.130637 | 19.34 |
| 2491   | 2015 | 0.74  | 0.09 | 1.292804 | 1.6713413 | 22.49474 | 0.095457 | 45.02 |
| 2491   | 2015 | -0.11 | 0.09 | 1.292804 | 1.6713413 | 22.49474 | 0.095457 | 45.02 |
| 2255   | 2015 | -0.49 | 0.09 | 1.292804 | 1.6713413 | 22.02138 | 0.044513 | 20.67 |
| 2150   | 2015 | -0.8  | 0.09 | 1.292804 | 1.6713413 | 20.6226  | 0.11041  | 42    |
| 2075   | 2015 | -0.78 | 0.09 | 1.292804 | 1.6713413 | 22.60274 | -0.03193 | 19.88 |
| 300331 | 2015 | 0.692 | 0.09 | 1.292804 | 1.6713413 | 20.36746 | 0.007017 | 27.01 |
| 2384   | 2015 | -0.36 | 0.09 | 1.292804 | 1.6713413 | 22.65659 | 0.014507 | 23.26 |
| 2367   | 2015 | 9E-04 | 0.09 | 1.292804 | 1.6713413 | 22.12173 | 0.207089 | 48.07 |
| 300390 | 2015 | 0.282 | 0.09 | 1.292804 | 1.6713413 | 20.69318 | 0.05917  | 34.75 |
| 2499   | 2015 | -0.51 | 0.09 | 1.292804 | 1.6713413 | 20.7479  | 0.036341 | 19.02 |
| 2519   | 2015 | -0.13 | 0.09 | 1.292804 | 1.6713413 | 21.92977 | 0.127108 | 34.67 |
| 2160   | 2015 | 0.102 | 0.09 | 1.292804 | 1.6713413 | 22.18042 | 0.050197 | 24.96 |
| 2635   | 2015 | -0.06 | 0.09 | 1.292804 | 1.6713413 | 21.85069 | 0.129408 | 35.31 |
| 2514   | 2015 | -0.41 | 0.09 | 1.292804 | 1.6713413 | 21.0651  | 0.033597 | 25.91 |
| 300215 | 2015 | -0.34 | 0.09 | 1.292804 | 1.6713413 | 22.06387 | 0.019583 | 31.52 |
| 2519   | 2015 | 0.042 | 0.09 | 1.292804 | 1.6713413 | 21.92977 | 0.127108 | 34.67 |
| 300228 | 2015 | 0.02  | 0.09 | 1.292804 | 1.6713413 | 22.07034 | 0.005957 | 11.74 |
| 2081   | 2015 | -0.23 | 0.09 | 1.292804 | 1.6713413 | 23.63463 | 0.183584 | 24.7  |
| 2514   | 2015 | -0.41 | 0.09 | 1.292804 | 1.6713413 | 21.0651  | 0.033597 | 25.91 |



|        |      |       |      |          |           |          |          |       |
|--------|------|-------|------|----------|-----------|----------|----------|-------|
| 2426   | 2015 | -0.31 | 0.09 | 1.292804 | 1.6713413 | 23.14873 | 0.051739 | 30.92 |
| 2531   | 2015 | 0.316 | 0.09 | 1.292804 | 1.6713413 | 22.25867 | 0.131384 | 35.8  |
| 2531   | 2015 | 0.316 | 0.09 | 1.292804 | 1.6713413 | 22.25867 | 0.131384 | 35.8  |
| 300260 | 2015 | -0.07 | 0.09 | 1.292804 | 1.6713413 | 20.73801 | -0.00332 | 28.38 |
| 777    | 2015 | 0.059 | 0.09 | 1.292804 | 1.6713413 | 21.36587 | 0.0712   | 17.92 |
| 2491   | 2015 | -0.02 | 0.09 | 1.292804 | 1.6713413 | 22.49474 | 0.095457 | 45.02 |
| 2435   | 2015 | -0.23 | 0.09 | 1.292804 | 1.6713413 | 21.07571 | 0.010674 | 28.04 |
| 2491   | 2015 | -0.16 | 0.09 | 1.292804 | 1.6713413 | 22.49474 | 0.095457 | 45.02 |
| 2150   | 2015 | -0.8  | 0.09 | 1.292804 | 1.6713413 | 20.6226  | 0.11041  | 42    |
| 603005 | 2015 | 0.919 | 0.09 | 1.292804 | 1.6713413 | 21.42655 | 0.068743 | 25.21 |
| 2426   | 2015 | -0.28 | 0.09 | 1.292804 | 1.6713413 | 23.14873 | 0.051739 | 30.92 |
| 2547   | 2015 | -0.51 | 0.09 | 1.292804 | 1.6713413 | 21.97949 | 0.097231 | 42.96 |
| 2150   | 2015 | -0.8  | 0.09 | 1.292804 | 1.6713413 | 20.6226  | 0.11041  | 42    |
| 300013 | 2015 | -0.43 | 0.09 | 1.292804 | 1.6713413 | 21.26448 | -0.0905  | 14.19 |
| 2547   | 2015 | -0.5  | 0.09 | 1.292804 | 1.6713413 | 21.97949 | 0.097231 | 42.96 |
| 2547   | 2015 | -0.62 | 0.09 | 1.292804 | 1.6713413 | 21.97949 | 0.097231 | 42.96 |
| 2450   | 2015 | 0.214 | 0.09 | 1.292804 | 1.6713413 | 23.21594 | 0.152466 | 15.28 |
| 603017 | 2015 | -0.04 | 0.09 | 1.292804 | 1.6713413 | 21.41793 | 0.078308 | 41.46 |
| 2547   | 2015 | -0.62 | 0.09 | 1.292804 | 1.6713413 | 21.97949 | 0.097231 | 42.96 |
| 777    | 2015 | -0.32 | 0.09 | 1.292804 | 1.6713413 | 21.27671 | 0.0712   | 17.92 |
| 600487 | 2015 | -0.05 | 0.09 | 1.292804 | 1.6713413 | 23.46296 | 0.130637 | 19.34 |
| 2635   | 2015 | -0.09 | 0.09 | 1.292804 | 1.6713413 | 21.85069 | 0.129408 | 35.31 |
| 2652   | 2015 | -0.24 | 0.09 | 1.292804 | 1.6713413 | 21.31555 | 0.101313 | 37.5  |
| 2564   | 2015 | -0.06 | 0.09 | 1.292804 | 1.6713413 | 22.65192 | 0.003631 | 38.57 |
| 2309   | 2015 | 0.037 | 0.09 | 1.292804 | 1.6713413 | 22.99006 | 0.092861 | 46.67 |
| 2450   | 2015 | 0.269 | 0.09 | 1.292804 | 1.6713413 | 23.63388 | 0.152466 | 15.28 |
| 2079   | 2015 | 0.17  | 0.09 | 1.292804 | 1.6713413 | 21.12178 | 0.014478 | 34.28 |
| 2367   | 2015 | -0.64 | 0.09 | 1.292804 | 1.6713413 | 22.12173 | 0.207089 | 48.07 |
| 777    | 2015 | -0.04 | 0.09 | 1.292804 | 1.6713413 | 21.36587 | 0.0712   | 17.92 |
| 2426   | 2015 | 0.762 | 0.09 | 1.292804 | 1.6713413 | 23.14873 | 0.051739 | 30.92 |
| 2564   | 2015 | -0.06 | 0.09 | 1.292804 | 1.6713413 | 22.60654 | 0.003631 | 38.57 |
| 300128 | 2015 | 0.021 | 0.09 | 1.292804 | 1.6713413 | 21.9216  | 0.014952 | 19.51 |
| 2384   | 2015 | -0.63 | 0.09 | 1.292804 | 1.6713413 | 22.65659 | 0.014507 | 23.26 |
| 600487 | 2015 | -0.55 | 0.09 | 1.292804 | 1.6713413 | 23.46296 | 0.130637 | 19.34 |
| 2463   | 2015 | 0.299 | 0.09 | 1.292804 | 1.6713413 | 22.41623 | 0.001716 | 23.88 |
| 2150   | 2015 | -0.8  | 0.09 | 1.292804 | 1.6713413 | 20.6226  | 0.11041  | 42    |
| 777    | 2015 | -0.32 | 0.09 | 1.292804 | 1.6713413 | 21.36587 | 0.0712   | 17.92 |
| 300382 | 2015 | 0.395 | 0.09 | 1.292804 | 1.6713413 | 20.54222 | 0.145443 | 69.36 |
| 2245   | 2015 | -0.57 | 0.09 | 1.292804 | 1.6713413 | 21.17973 | 0.145842 | 33.61 |
| 2384   | 2015 | -0.13 | 0.09 | 1.292804 | 1.6713413 | 22.65659 | 0.014507 | 23.26 |
| 2531   | 2015 | 0.316 | 0.09 | 1.292804 | 1.6713413 | 22.25867 | 0.131384 | 35.8  |
| 600487 | 2015 | -0.61 | 0.09 | 1.292804 | 1.6713413 | 23.46296 | 0.130637 | 19.34 |
| 603699 | 2015 | -0.19 | 0.09 | 1.292804 | 1.6713413 | 22.09991 | 0.138203 | 53.15 |
| 300346 | 2015 | 1.323 | 0.09 | 1.292804 | 1.6713413 | 20.9852  | 0.03677  | 19.95 |
| 2309   | 2015 | 0.036 | 0.09 | 1.292804 | 1.6713413 | 22.99006 | 0.092861 | 46.67 |
| 2631   | 2015 | -0.68 | 0.09 | 1.292804 | 1.6713413 | 21.29865 | 0.082941 | 54.95 |
| 2514   | 2015 | -0.24 | 0.09 | 1.292804 | 1.6713413 | 21.0651  | 0.033597 | 25.91 |
| 300013 | 2015 | 0.168 | 0.09 | 1.292804 | 1.67E+00  | 21.26448 | -0.0905  | 14.19 |
| 603017 | 2015 | -0.17 | 0.09 | 1.292804 | 1.67E+00  | 21.41793 | 0.078308 | 41.46 |
| 600487 | 2015 | -0.33 | 0.09 | 1.292804 | 1.67E+00  | 23.46296 | 0.130637 | 19.34 |
| 601700 | 2015 | 0.076 | 0.09 | 1.292804 | 1.67E+00  | 22.04813 | 0.07191  | 29.24 |
| 2255   | 2015 | -0.43 | 0.09 | 1.292804 | 1.67E+00  | 22.02138 | 0.044513 | 20.67 |
| 2426   | 2015 | -0.04 | 0.09 | 1.292804 | 1.67E+00  | 23.14873 | 0.051739 | 30.92 |
| 551    | 2015 | 0.847 | 0.09 | 1.292804 | 1.67E+00  | 20.8947  | 0.036164 | 34.33 |

|        |      |       |      |          |           |          |          |       |
|--------|------|-------|------|----------|-----------|----------|----------|-------|
| 2491   | 2015 | -0.18 | 0.09 | 1.292804 | 1.67E+00  | 22.49474 | 0.095457 | 45.02 |
| 600105 | 2015 | -0.48 | 0.09 | 1.292804 | 1.6713413 | 21.94135 | 0.087729 | 37.19 |
| 2079   | 2015 | 0.17  | 0.09 | 1.292804 | 1.6713413 | 21.12178 | 0.014478 | 34.28 |
| 2089   | 2015 | 0.986 | 0.09 | 1.292804 | 1.6713413 | 22.30841 | 0.079015 | 18.05 |
| 2564   | 2015 | -0.26 | 0.09 | 1.292804 | 1.6713413 | 22.65192 | 0.003631 | 38.57 |
| 600527 | 2015 | -0.01 | 0.09 | 1.292804 | 1.6713413 | 21.29423 | -0.01087 | 11.83 |
| 2309   | 2015 | -0.47 | 0.09 | 1.292804 | 1.6713413 | 22.99006 | 0.092861 | 46.67 |
| 2499   | 2015 | -0.36 | 0.09 | 1.292804 | 1.67E+00  | 20.7479  | 0.036341 | 19.02 |
| 300141 | 2015 | -0.35 | 0.09 | 1.292804 | 1.67E+00  | 20.45281 | 0.032189 | 45.41 |
| 2387   | 2015 | -0.92 | 0.09 | 1.292804 | 1.67E+00  | 20.92775 | -0.4336  | 32.56 |
| 300382 | 2015 | 0.312 | 0.09 | 1.292804 | 1.67E+00  | 20.54222 | 0.145443 | 69.36 |
| 300013 | 2015 | -0.08 | 0.09 | 1.292804 | 1.67E+00  | 21.26448 | -0.0905  | 14.19 |
| 601700 | 2015 | -0.16 | 0.09 | 1.292804 | 1.6713413 | 22.09924 | 0.07191  | 29.24 |
| 300128 | 2015 | -0.26 | 0.09 | 1.292804 | 1.6713413 | 21.9216  | 0.014952 | 19.51 |
| 300331 | 2015 | 0.692 | 0.09 | 1.292804 | 1.6713413 | 20.36746 | 0.007017 | 27.01 |
| 2309   | 2015 | -0.09 | 0.09 | 1.292804 | 1.6713413 | 22.99006 | 0.092861 | 46.67 |
| 600527 | 2015 | -0.01 | 0.09 | 1.292804 | 1.6713413 | 21.29423 | -0.01087 | 11.83 |
| 2089   | 2015 | 0.986 | 0.09 | 1.292804 | 1.6713413 | 21.94602 | 0.079015 | 18.05 |
| 2075   | 2015 | -0.78 | 0.09 | 1.292804 | 1.6713413 | 22.60274 | -0.03193 | 19.88 |
| 300261 | 2015 | 0.8   | 0.09 | 1.292804 | 1.6713413 | 21.17991 | 0.08273  | 45.07 |
| 300128 | 2015 | 0.021 | 0.09 | 1.292804 | 1.6713413 | 21.9216  | 0.014952 | 19.51 |
| 2435   | 2015 | -0.23 | 0.09 | 1.292804 | 1.6713413 | 21.07571 | 0.010674 | 28.04 |
| 2309   | 2015 | 0.036 | 0.09 | 1.292804 | 1.6713413 | 22.99006 | 0.092861 | 46.67 |
| 551    | 2015 | 0.185 | 0.09 | 1.292804 | 1.6713413 | 20.8947  | 0.036164 | 34.33 |
| 2245   | 2015 | -0.02 | 0.09 | 1.292804 | 1.6713413 | 21.17973 | 0.145842 | 33.61 |
| 2547   | 2015 | -0.4  | 0.09 | 1.292804 | 1.6713413 | 21.97949 | 0.097231 | 42.96 |
| 2564   | 2015 | -0.26 | 0.09 | 1.292804 | 1.6713413 | 22.65192 | 0.003631 | 38.57 |
| 2150   | 2015 | -0.8  | 0.09 | 1.292804 | 1.6713413 | 20.23382 | 0.11041  | 42    |
| 2367   | 2015 | -0.02 | 0.09 | 1.292804 | 1.6713413 | 22.12173 | 0.207089 | 48.07 |
| 2631   | 2015 | -0.3  | 0.09 | 1.292804 | 1.6713413 | 21.29865 | 0.082941 | 54.95 |
| 300215 | 2015 | 0.409 | 0.09 | 1.292804 | 1.6713413 | 22.06387 | 0.019583 | 31.52 |
| 300013 | 2015 | 0.168 | 0.09 | 1.292804 | 1.6713413 | 21.15452 | -0.0905  | 14.19 |
| 300211 | 2015 | -0.41 | 0.09 | 1.292804 | 1.6713413 | 20.20405 | 0.023545 | 48.4  |
| 300013 | 2015 | 0.168 | 0.09 | 1.292804 | 1.6713413 | 21.26448 | -0.0905  | 14.19 |
| 300331 | 2015 | 0.692 | 0.09 | 1.292804 | 1.6713413 | 20.31471 | 0.007017 | 27.01 |
| 300215 | 2015 | 0.502 | 0.09 | 1.292804 | 1.6713413 | 22.04255 | 0.019583 | 31.52 |
| 300128 | 2015 | 0.021 | 0.09 | 1.292804 | 1.6713413 | 21.56154 | 0.014952 | 19.51 |
| 300331 | 2015 | 0.692 | 0.09 | 1.292804 | 1.6713413 | 20.36746 | 0.007017 | 27.01 |
| 2081   | 2015 | -0.22 | 0.09 | 1.292804 | 1.6713413 | 23.93431 | 0.183584 | 24.7  |
| 551    | 2015 | -0.48 | 0.09 | 1.292804 | 1.6713413 | 20.8947  | 0.036164 | 34.33 |
| 2367   | 2015 | 0.026 | 0.09 | 1.292804 | 1.6713413 | 22.12173 | 0.207089 | 48.07 |
| 601599 | 2015 | -0.96 | 0.09 | 1.292804 | 1.6713413 | 21.97742 | 0.077654 | 16.35 |
| 2631   | 2015 | -0.05 | 0.09 | 1.292804 | 1.6713413 | 21.29865 | 0.082941 | 54.95 |
| 2519   | 2015 | -0.11 | 0.09 | 1.292804 | 1.6713413 | 21.92977 | 0.127108 | 34.67 |
| 300325 | 2015 | 0.618 | 0.09 | 1.292804 | 1.6713413 | 21.48768 | 0.076175 | 32.9  |
| 300292 | 2015 | -0.12 | 0.09 | 1.292804 | 1.6713413 | 21.84094 | 0.069953 | 31.37 |
| 2255   | 2015 | -0.38 | 0.09 | 1.292804 | 1.6713413 | 22.02138 | 0.044513 | 20.67 |
| 2384   | 2015 | -0.63 | 0.09 | 1.292804 | 1.6713413 | 22.45873 | 0.014507 | 23.26 |
| 2384   | 2015 | -0.53 | 0.09 | 1.292804 | 1.6713413 | 22.65659 | 0.014507 | 23.26 |
| 2450   | 2015 | 0.068 | 0.09 | 1.292804 | 1.6713413 | 23.63388 | 0.152466 | 15.28 |
| 2426   | 2015 | -0.06 | 0.09 | 1.292804 | 1.6713413 | 22.66686 | 0.051739 | 30.92 |
| 2309   | 2015 | -0.13 | 0.09 | 1.292804 | 1.6713413 | 22.99006 | 0.092861 | 46.67 |
| 600487 | 2015 | -0.25 | 0.09 | 1.292804 | 1.6713413 | 23.46296 | 0.130637 | 19.34 |
| 600487 | 2015 | 0.553 | 0.09 | 1.292804 | 1.6713413 | 23.46296 | 0.130637 | 19.34 |

|        |      |       |      |          |           |          |          |       |
|--------|------|-------|------|----------|-----------|----------|----------|-------|
| 603005 | 2015 | 0.919 | 0.09 | 1.292804 | 1.6713413 | 21.41564 | 0.068743 | 25.21 |
| 300260 | 2015 | -0.15 | 0.09 | 1.292804 | 1.6713413 | 20.73801 | -0.00332 | 28.38 |
| 2255   | 2015 | -0.36 | 0.09 | 1.292804 | 1.6713413 | 22.02138 | 0.044513 | 20.67 |
| 551    | 2015 | -0.1  | 0.09 | 1.292804 | 1.6713413 | 20.8947  | 0.036164 | 34.33 |
| 2426   | 2015 | -0.56 | 0.09 | 1.292804 | 1.6713413 | 23.14873 | 0.051739 | 30.92 |
| 551    | 2015 | -0.19 | 0.09 | 1.292804 | 1.6713413 | 20.8947  | 0.036164 | 34.33 |
| 300141 | 2015 | -0.3  | 0.09 | 1.292804 | 1.6713413 | 20.57485 | 0.032189 | 45.41 |
| 300141 | 2015 | -0.35 | 0.09 | 1.292804 | 1.6713413 | 20.57485 | 0.032189 | 45.41 |
| 2631   | 2015 | -0.11 | 0.09 | 1.292804 | 1.6713413 | 21.29865 | 0.082941 | 54.95 |
| 300192 | 2015 | -0.55 | 0.09 | 1.292804 | 1.6713413 | 20.49393 | 0.05116  | 37.47 |
| 300261 | 2015 | 0.8   | 0.09 | 1.292804 | 1.6713413 | 21.17991 | 0.08273  | 45.07 |
| 2079   | 2015 | 0.087 | 0.09 | 1.292804 | 1.6713413 | 21.18054 | 0.014478 | 34.28 |
| 551    | 2015 | -0.11 | 0.09 | 1.292804 | 1.6713413 | 20.8947  | 0.036164 | 34.33 |
| 2564   | 2015 | -0.26 | 0.09 | 1.292804 | 1.6713413 | 22.65192 | 0.003631 | 38.57 |
| 300292 | 2015 | 0.069 | 0.09 | 1.292804 | 1.6713413 | 21.69329 | 0.069953 | 31.37 |
| 600487 | 2015 | -0.17 | 0.09 | 1.292804 | 1.6713413 | 23.46296 | 0.130637 | 19.34 |
| 300346 | 2015 | 1.323 | 0.09 | 1.292804 | 1.6713413 | 20.95765 | 0.03677  | 19.95 |
| 600105 | 2015 | -0.2  | 0.09 | 1.292804 | 1.6713413 | 21.94135 | 0.087729 | 37.19 |
| 2075   | 2015 | -0.23 | 0.09 | 1.292804 | 1.6713413 | 22.60274 | -0.03193 | 19.88 |
| 300228 | 2015 | 0.275 | 0.09 | 1.292804 | 1.6713413 | 22.07034 | 0.005957 | 11.74 |
| 300128 | 2015 | 0.021 | 0.09 | 1.292804 | 1.6713413 | 21.9216  | 0.014952 | 19.51 |
| 300228 | 2015 | 0.26  | 0.09 | 1.292804 | 1.6713413 | 22.07034 | 0.005957 | 11.74 |
| 600487 | 2015 | -0.41 | 0.09 | 1.292804 | 1.6713413 | 23.46296 | 0.130637 | 19.34 |
| 2531   | 2015 | 0.316 | 0.09 | 1.292804 | 1.6713413 | 22.25867 | 0.131384 | 35.8  |
| 300390 | 2015 | 0.514 | 0.09 | 1.292804 | 1.6713413 | 20.69318 | 0.05917  | 34.75 |
| 300165 | 2015 | 0.58  | 0.09 | 1.292804 | 1.6713413 | 21.21461 | 0.0293   | 40.08 |
| 300013 | 2015 | 0.168 | 0.09 | 1.292804 | 1.6713413 | 21.26448 | -0.0905  | 14.19 |
| 2079   | 2015 | 0.17  | 0.09 | 1.292804 | 1.6713413 | 21.12178 | 0.014478 | 34.28 |
| 300192 | 2015 | -0.55 | 0.09 | 1.292804 | 1.6713413 | 20.50377 | 0.05116  | 37.47 |
| 300261 | 2015 | 0.8   | 0.09 | 1.292804 | 1.6713413 | 21.17991 | 0.08273  | 45.07 |
| 600200 | 2015 | 0.479 | 0.09 | 1.292804 | 1.6713413 | 22.16841 | 0.037004 | 18.34 |
| 300346 | 2015 | 1.323 | 0.09 | 1.292804 | 1.6713413 | 20.9852  | 0.03677  | 19.95 |
| 2635   | 2015 | -0.09 | 0.09 | 1.292804 | 1.6713413 | 21.85069 | 0.129408 | 35.31 |
| 2491   | 2015 | 0.232 | 0.09 | 1.292804 | 1.6713413 | 22.49474 | 0.095457 | 45.02 |
| 2426   | 2015 | -0    | 0.09 | 1.292804 | 1.6713413 | 23.14873 | 0.051739 | 30.92 |
| 300228 | 2015 | -0.18 | 0.09 | 1.292804 | 1.6713413 | 22.07034 | 0.005957 | 11.74 |
| 551    | 2015 | -0.16 | 0.09 | 1.292804 | 1.6713413 | 20.8947  | 0.036164 | 34.33 |
| 300390 | 2015 | 0.282 | 0.09 | 1.292804 | 1.6713413 | 20.69318 | 0.05917  | 34.75 |
| 300260 | 2015 | -0.07 | 0.09 | 1.292804 | 1.6713413 | 20.68686 | -0.00332 | 28.38 |
| 300141 | 2015 | -0.43 | 0.09 | 1.292804 | 1.6713413 | 20.57485 | 0.032189 | 45.41 |
| 2450   | 2015 | 1.265 | 0.09 | 1.292804 | 1.6713413 | 23.63388 | 0.152466 | 15.28 |
| 300331 | 2015 | 0.692 | 0.09 | 1.292804 | 1.6713413 | 20.36746 | 0.007017 | 27.01 |
| 551    | 2015 | -0.11 | 0.09 | 1.292804 | 1.6713413 | 20.8947  | 0.036164 | 34.33 |
| 600487 | 2015 | 0.07  | 0.09 | 1.292804 | 1.6713413 | 23.46296 | 0.130637 | 19.34 |
| 600487 | 2015 | 0.313 | 0.09 | 1.292804 | 1.6713413 | 23.46296 | 0.130637 | 19.34 |
| 600105 | 2015 | -0.28 | 0.09 | 1.292804 | 1.6713413 | 21.94135 | 0.087729 | 37.19 |
| 600487 | 2015 | 0.273 | 0.09 | 1.292804 | 1.6713413 | 23.46296 | 0.130637 | 19.34 |
| 2463   | 2015 | 0.299 | 0.09 | 1.292804 | 1.6713413 | 22.32771 | 0.001716 | 23.88 |
| 2075   | 2015 | -0.78 | 0.09 | 1.292804 | 1.6713413 | 22.60274 | -0.03193 | 19.88 |
| 2091   | 2015 | 0.536 | 0.09 | 1.292804 | 1.6713413 | 22.04359 | 0.135031 | 30.4  |
| 2333   | 2015 | -0.47 | 0.09 | 1.292804 | 1.6713413 | 21.20921 | 0.140237 | 65.46 |
| 300192 | 2015 | -0.55 | 0.09 | 1.292804 | 1.6713413 | 20.50377 | 0.05116  | 37.47 |
| 2519   | 2015 | 0.008 | 0.09 | 1.292804 | 1.6713413 | 21.92977 | 0.127108 | 34.67 |
| 2564   | 2015 | -0.07 | 0.09 | 1.292804 | 1.6713413 | 22.65192 | 0.003631 | 38.57 |

|        |      |       |      |          |           |          |          |       |
|--------|------|-------|------|----------|-----------|----------|----------|-------|
| 2450   | 2015 | 0.595 | 0.09 | 1.292804 | 1.6713413 | 23.63388 | 0.152466 | 15.28 |
| 600105 | 2015 | -0.48 | 0.09 | 1.292804 | 1.6713413 | 21.94135 | 0.087729 | 37.19 |
| 2075   | 2015 | -0.87 | 0.09 | 1.292804 | 1.6713413 | 22.60274 | -0.03193 | 19.88 |
| 2387   | 2015 | -0.92 | 0.09 | 1.292804 | 1.6713413 | 20.92775 | -0.4336  | 32.56 |
| 603699 | 2015 | -0.37 | 0.09 | 1.292804 | 1.6713413 | 22.09991 | 0.138203 | 53.15 |
| 600487 | 2015 | 0.111 | 0.09 | 1.292804 | 1.6713413 | 23.46296 | 0.130637 | 19.34 |
| 777    | 2015 | -0.32 | 0.09 | 1.292804 | 1.6713413 | 21.36587 | 0.0712   | 17.92 |
| 300382 | 2015 | -0.13 | 0.09 | 1.292804 | 1.6713413 | 20.54222 | 0.145443 | 69.36 |
| 2079   | 2015 | 0.057 | 0.09 | 1.292804 | 1.6713413 | 21.12178 | 0.014478 | 34.28 |
| 2631   | 2015 | -0.04 | 0.09 | 1.292804 | 1.6713413 | 21.29865 | 0.082941 | 54.95 |
| 300228 | 2015 | -0.22 | 0.09 | 1.292804 | 1.6713413 | 21.95069 | 0.005957 | 11.74 |
| 2333   | 2015 | -0.35 | 0.09 | 1.292804 | 1.6713413 | 21.19242 | 0.140237 | 65.46 |
| 2075   | 2015 | -0.23 | 0.09 | 1.292804 | 1.6713413 | 21.69309 | -0.03193 | 19.88 |
| 300128 | 2015 | -0.64 | 0.09 | 1.292804 | 1.6713413 | 21.9216  | 0.014952 | 19.51 |
| 2514   | 2015 | -0.28 | 0.09 | 1.292804 | 1.6713413 | 20.90543 | 0.033597 | 25.91 |
| 2426   | 2015 | -0.47 | 0.09 | 1.292804 | 1.6713413 | 23.14873 | 0.051739 | 30.92 |
| 2519   | 2015 | 0.008 | 0.09 | 1.292804 | 1.6713413 | 21.92977 | 0.127108 | 34.67 |
| 603005 | 2015 | 0.919 | 0.09 | 1.292804 | 1.6713413 | 21.41564 | 0.068743 | 25.21 |
| 300165 | 2015 | 0.522 | 0.09 | 1.292804 | 1.6713413 | 21.263   | 0.0293   | 40.08 |
| 300165 | 2015 | 0.58  | 0.09 | 1.292804 | 1.6713413 | 21.263   | 0.0293   | 40.08 |
| 2079   | 2015 | 0.057 | 0.09 | 1.292804 | 1.6713413 | 21.12178 | 0.014478 | 34.28 |
| 2079   | 2015 | 0.057 | 0.09 | 1.292804 | 1.6713413 | 21.12178 | 0.014478 | 34.28 |
| 2435   | 2015 | -0.23 | 0.09 | 1.292804 | 1.6713413 | 20.81876 | 0.010674 | 28.04 |
| 600200 | 2015 | 0.479 | 0.09 | 1.292804 | 1.6713413 | 21.37556 | 0.037004 | 18.34 |
| 300261 | 2015 | 0.8   | 0.09 | 1.292804 | 1.6713413 | 21.17991 | 0.08273  | 45.07 |
| 2255   | 2015 | -0.36 | 0.09 | 1.292804 | 1.6713413 | 22.02138 | 0.044513 | 20.67 |
| 2384   | 2015 | -0.63 | 0.09 | 1.292804 | 1.6713413 | 22.65659 | 0.014507 | 23.26 |
| 600487 | 2015 | -0.05 | 0.09 | 1.292804 | 1.6713413 | 23.46296 | 0.130637 | 19.34 |
| 551    | 2015 | -0.11 | 0.09 | 1.292804 | 1.6713413 | 20.8947  | 0.036164 | 34.33 |
| 2309   | 2015 | -0.08 | 0.09 | 1.292804 | 1.6713413 | 22.99006 | 0.092861 | 46.67 |
| 2255   | 2015 | -0.43 | 0.09 | 1.292804 | 1.6713413 | 21.87576 | 0.044513 | 20.67 |
| 300261 | 2015 | 0.8   | 0.09 | 1.292804 | 1.6713413 | 21.17991 | 0.08273  | 45.07 |
| 551    | 2015 | -0.16 | 0.09 | 1.292804 | 1.6713413 | 20.8947  | 0.036164 | 34.33 |
| 2635   | 2015 | -0.09 | 0.09 | 1.292804 | 1.6713413 | 21.72388 | 0.129408 | 35.31 |
| 2089   | 2015 | 0.986 | 0.09 | 1.292804 | 1.6713413 | 22.30841 | 0.079015 | 18.05 |
| 2384   | 2015 | -0.36 | 0.09 | 1.292804 | 1.6713413 | 22.65659 | 0.014507 | 23.26 |
| 2333   | 2015 | -0.1  | 0.09 | 1.292804 | 1.6713413 | 21.20921 | 0.140237 | 65.46 |
| 2531   | 2015 | 0.316 | 0.09 | 1.292804 | 1.6713413 | 21.96618 | 0.131384 | 35.8  |
| 300261 | 2015 | 0.8   | 0.09 | 1.292804 | 1.6713413 | 21.17991 | 0.08273  | 45.07 |
| 2652   | 2015 | -0.71 | 0.09 | 1.292804 | 1.6713413 | 20.92365 | 0.101313 | 37.5  |
| 2160   | 2015 | 0.102 | 0.09 | 1.292804 | 1.6713413 | 22.27332 | 0.050197 | 24.96 |
| 2499   | 2015 | -0.36 | 0.09 | 1.292804 | 1.6713413 | 20.7479  | 0.036341 | 19.02 |
| 551    | 2015 | -0.11 | 0.09 | 1.292804 | 1.6713413 | 20.8947  | 0.036164 | 34.33 |
| 300260 | 2015 | -0.07 | 0.09 | 1.292804 | 1.6713413 | 20.73801 | -0.00332 | 28.38 |
| 2491   | 2015 | 0.077 | 0.09 | 1.292804 | 1.6713413 | 22.49474 | 0.095457 | 45.02 |
| 2426   | 2015 | 0.099 | 0.09 | 1.292804 | 1.6713413 | 23.14873 | 0.051739 | 30.92 |
| 600487 | 2015 | -0.53 | 0.09 | 1.292804 | 1.6713413 | 23.46296 | 0.130637 | 19.34 |
| 2384   | 2015 | -0.2  | 0.09 | 1.292804 | 1.6713413 | 22.65659 | 0.014507 | 23.26 |
| 2172   | 2015 | -0.7  | 0.09 | 1.292804 | 1.6713413 | 21.1604  | 0.090449 | 51.83 |
| 300211 | 2015 | -0.41 | 0.09 | 1.292804 | 1.6713413 | 20.20405 | 0.023545 | 48.4  |
| 300342 | 2015 | 0.384 | 0.09 | 1.292804 | 1.6713413 | 20.77293 | 0.140934 | 50.06 |
| 300128 | 2015 | 0.021 | 0.09 | 1.292804 | 1.6713413 | 21.9216  | 0.014952 | 19.51 |
| 2387   | 2015 | -0.92 | 0.09 | 1.292804 | 1.6713413 | 20.92775 | -0.4336  | 32.56 |
| 2081   | 2015 | -0.21 | 0.09 | 1.292804 | 1.6713413 | 23.93431 | 0.183584 | 24.7  |

|        |      |       |      |          |            |          |          |       |
|--------|------|-------|------|----------|------------|----------|----------|-------|
| 2091   | 2015 | 0.536 | 0.09 | 1.292804 | 1.6713413  | 22.04359 | 0.135031 | 30.4  |
| 300342 | 2015 | 0.384 | 0.09 | 1.292804 | 1.6713413  | 20.70524 | 0.140934 | 50.06 |
| 300228 | 2015 | -0.37 | 0.09 | 1.292804 | 1.6713413  | 22.07034 | 0.005957 | 11.74 |
| 2255   | 2015 | -0.34 | 0.09 | 1.292804 | 1.6713413  | 22.02138 | 0.044513 | 20.67 |
| 2531   | 2015 | 0.316 | 0.09 | 1.292804 | 1.6713413  | 22.25867 | 0.131384 | 35.8  |
| 2367   | 2015 | 0.026 | 0.09 | 1.292804 | 1.6713413  | 22.12173 | 0.207089 | 48.07 |
| 300292 | 2015 | -0.1  | 0.09 | 1.292804 | 1.6713413  | 21.84094 | 0.069953 | 31.37 |
| 300261 | 2015 | 0.8   | 0.09 | 1.292804 | 1.6713413  | 20.70555 | 0.08273  | 45.07 |
| 300228 | 2015 | -0.06 | 0.09 | 1.292804 | 1.6713413  | 22.07034 | 0.005957 | 11.74 |
| 300393 | 2015 | -0.29 | 0.09 | 1.292804 | 1.6713413  | 21.19212 | 0.121952 | 32.23 |
| 2089   | 2015 | 1.01  | 0.09 | 1.292804 | 1.6713413  | 22.30841 | 0.079015 | 18.05 |
| 2491   | 2015 | 0.036 | 0.09 | 1.292804 | 1.6713413  | 22.49474 | 0.095457 | 45.02 |
| 300013 | 2015 | -0.34 | 0.09 | 1.292804 | 1.6713413  | 21.26448 | -0.0905  | 14.19 |
| 2091   | 2015 | 0.536 | 0.09 | 1.292804 | 1.6713413  | 22.04359 | 0.135031 | 30.4  |
| 2463   | 2015 | 0.299 | 0.09 | 1.292804 | 1.67E+00   | 22.41623 | 0.001716 | 23.88 |
| 600200 | 2015 | 0.479 | 0.09 | 1.292804 | 1.67E+00   | 22.16841 | 0.037004 | 18.34 |
| 300390 | 2015 | -0.63 | 0.09 | 1.292804 | 1.67E+00   | 20.69318 | 0.05917  | 34.75 |
| 2450   | 2015 | 0.595 | 0.09 | 1.292804 | 1.6713413  | 23.63388 | 0.152466 | 15.28 |
| 603699 | 2015 | 0.105 | 0.09 | 1.292804 | 1.6713413  | 22.03773 | 0.138203 | 53.15 |
| 300292 | 2015 | -0.19 | 0.09 | 1.292804 | 1.6713413  | 21.84094 | 0.069953 | 31.37 |
| 300165 | 2015 | 0.354 | 0.09 | 1.292804 | 1.6713413  | 21.263   | 0.0293   | 40.08 |
| 300013 | 2015 | -0.72 | 0.09 | 1.292804 | 1.6713413  | 21.26448 | -0.0905  | 14.19 |
| 300128 | 2015 | 0.021 | 0.09 | 1.292804 | 1.6713413  | 21.9216  | 0.014952 | 19.51 |
| 300292 | 2015 | -0.21 | 0.09 | 1.292804 | 1.6713413  | 21.84094 | 0.069953 | 31.37 |
| 300128 | 2015 | -0.31 | 0.09 | 1.292804 | 1.6713413  | 21.9216  | 0.014952 | 19.51 |
| 300260 | 2015 | 0.021 | 0.09 | 1.292804 | 1.6713413  | 20.73801 | -0.00332 | 28.38 |
| 2245   | 2015 | -0.05 | 0.09 | 1.292804 | 1.6713413  | 21.63466 | 0.145842 | 33.61 |
| 300228 | 2015 | 0.112 | 0.09 | 1.292804 | 1.6713413  | 22.07034 | 0.005957 | 11.74 |
| 2463   | 2015 | 0.299 | 0.09 | 1.292804 | 1.6713413  | 22.41623 | 0.001716 | 23.88 |
| 2091   | 2015 | 0.478 | 0.09 | 1.292804 | 1.67E+00   | 22.04359 | 0.135031 | 30.4  |
| 2290   | 2015 | 0.22  | 0.09 | 1.292804 | 1.67E+00   | 21.01247 | 0.033802 | 29.8  |
| 2160   | 2015 | -0.55 | 0.09 | 1.292804 | 1.67E+00   | 22.27332 | 0.050197 | 24.96 |
| 2426   | 2015 | -0.33 | 0.09 | 1.292804 | 1.67E+00   | 23.14873 | 0.051739 | 30.92 |
| 551    | 2015 | 0.185 | 0.09 | 1.292804 | 1.67E+00   | 20.8947  | 0.036164 | 34.33 |
| 551    | 2015 | -0.11 | 0.09 | 1.292804 | 1.67E+00   | 20.8947  | 0.036164 | 34.33 |
| 2491   | 2015 | 0.077 | 0.09 | 1.292804 | 1.67E+00   | 22.49474 | 0.095457 | 45.02 |
| 2089   | 2015 | 0.986 | 0.09 | 1.292804 | 1.67E+00   | 22.30841 | 0.079015 | 18.05 |
| 300331 | 2015 | 0.692 | 0.09 | 1.292804 | 1.67E+00   | 20.36746 | 0.007017 | 27.01 |
| 2499   | 2015 | -0.48 | 0.09 | 1.292804 | 1.67E+00   | 20.7479  | 0.036341 | 19.02 |
| 300013 | 2015 | -0.72 | 0.09 | 1.292804 | 1.67E+00   | 21.26448 | -0.0905  | 14.19 |
| 2309   | 2015 | -0.08 | 0.09 | 1.292804 | 1.67E+00   | 22.99006 | 0.092861 | 46.67 |
| 2652   | 2015 | -0.24 | 0.09 | 1.292804 | 1.67E+00   | 21.31555 | 0.101313 | 37.5  |
| 300342 | 2015 | 0.384 | 0.09 | 1.292804 | 1.67E+00   | 20.77293 | 0.140934 | 50.06 |
| 2367   | 2015 | -0.64 | 0.09 | 1.292804 | 1.67E+00   | 22.12173 | 0.207089 | 48.07 |
| 300390 | 2015 | -0.14 | 0.09 | 1.292804 | 1.67E+00   | 20.69318 | 0.05917  | 34.75 |
| 300165 | 2015 | 0.663 | 0.09 | 1.292804 | 1.67E+00   | 21.263   | 0.0293   | 40.08 |
| 300165 | 2015 | 0.58  | 0.09 | 1.292804 | 1.67E+00   | 21.263   | 0.0293   | 40.08 |
| 300141 | 2015 | -0.35 | 0.09 | 1.292804 | 1.67E+00   | 20.57485 | 0.032189 | 45.41 |
| 637    | 2015 | -0.7  | 0.09 | 0.006384 | 4.08E-05   | 20.9637  | 0.143105 | 29.5  |
| 637    | 2015 | -0.7  | 0.09 | 0.006384 | 4.08E-05   | 20.9637  | 0.143105 | 29.5  |
| 637    | 2015 | -0.7  | 0.09 | 0.006384 | 4.08E-05   | 20.9637  | 0.143105 | 29.5  |
| 637    | 2015 | -0.7  | 0.09 | 0.006384 | 4.08E-05   | 20.49305 | 0.143105 | 29.5  |
| 637    | 2015 | -0.7  | 0.09 | 0.006384 | 4.08E-05   | 20.9637  | 0.143105 | 29.5  |
| 637    | 2015 | -0.7  | 0.09 | 0.006384 | 0.00004075 | 20.9637  | 0.143105 | 29.5  |

|        |      |       |      |          |            |          |          |       |
|--------|------|-------|------|----------|------------|----------|----------|-------|
| 600566 | 2015 | 0.104 | 0.12 | 0.918871 | 0.84432391 | 22.6252  | 0.251811 | 66.13 |
| 670    | 2015 | 2.064 | 0.12 | 0.918871 | 0.84432391 | 20.38582 | 0.016915 | 25.92 |
| 600566 | 2015 | 0.104 | 0.12 | 0.918871 | 0.84432391 | 22.00014 | 0.251811 | 66.13 |
| 600566 | 2015 | 0.104 | 0.12 | 0.918871 | 0.84432391 | 22.00014 | 0.251811 | 66.13 |
| 760    | 2015 | 1.471 | 0.12 | 0.918871 | 0.84432391 | 21.31568 | -0.12178 | 15.21 |
| 600703 | 2015 | -0.08 | 0.12 | 0.918871 | 0.84432391 | 23.75724 | 0.109365 | 29.76 |
| 600566 | 2015 | 0.104 | 0.12 | 0.918871 | 0.84432391 | 22.00014 | 0.251811 | 66.13 |
| 670    | 2015 | 2.064 | 0.12 | 0.918871 | 0.84432391 | 20.98231 | 0.016915 | 25.92 |
| 600703 | 2015 | 0.417 | 0.12 | 0.918871 | 0.84432391 | 23.75724 | 0.109365 | 29.76 |
| 670    | 2015 | 1.739 | 0.12 | 0.918871 | 0.84432391 | 20.38582 | 0.016915 | 25.92 |
| 600703 | 2015 | 0.302 | 0.12 | 0.918871 | 0.84432391 | 23.75724 | 0.109365 | 29.76 |
| 600703 | 2015 | 0.709 | 0.12 | 0.918871 | 0.84432391 | 23.75724 | 0.109365 | 29.76 |
| 760    | 2015 | 1.471 | 0.12 | 0.918871 | 0.84432391 | 21.39047 | -0.12178 | 15.21 |
| 300395 | 2015 | -0.08 | 0.12 | 0.918871 | 0.84432391 | 20.58089 | 0.116982 | 15.18 |
| 600703 | 2015 | -0.4  | 0.12 | 0.918871 | 0.84432391 | 23.75724 | 0.109365 | 29.76 |
| 600703 | 2015 | 0.038 | 0.12 | 0.918871 | 0.84432391 | 23.75724 | 0.109365 | 29.76 |
| 600703 | 2015 | 0.154 | 0.12 | 0.918871 | 0.84432391 | 23.75724 | 0.109365 | 29.76 |
| 760    | 2015 | 1.471 | 0.12 | 0.918871 | 0.84432391 | 21.39047 | -0.12178 | 15.21 |
| 300395 | 2015 | -0.08 | 0.12 | 0.918871 | 0.84432391 | 20.58089 | 0.116982 | 15.18 |
| 600703 | 2015 | 0.318 | 0.12 | 0.918871 | 0.84432391 | 23.75724 | 0.109365 | 29.76 |
| 600566 | 2015 | 0.104 | 0.12 | 0.918871 | 0.84432391 | 22.00014 | 0.251811 | 66.13 |
| 600566 | 2015 | 0.104 | 0.12 | 0.918871 | 0.84432391 | 22.00014 | 0.251811 | 66.13 |
| 553    | 2015 | 0.013 | 0.12 | 0.918871 | 0.84432391 | 21.81367 | 0.067682 | 20.15 |
| 670    | 2015 | 2.481 | 0.12 | 0.918871 | 0.84432391 | 20.38582 | 0.016915 | 25.92 |
| 600703 | 2015 | 0.48  | 0.12 | 0.918871 | 0.84432391 | 23.75724 | 0.109365 | 29.76 |
| 300395 | 2015 | -0.08 | 0.12 | 0.918871 | 0.84432391 | 20.57531 | 0.116982 | 15.18 |
| 600566 | 2015 | 0.104 | 0.12 | 0.918871 | 0.84432391 | 22.00014 | 0.251811 | 66.13 |
| 553    | 2015 | 0.013 | 0.12 | 0.918871 | 0.84432391 | 21.81367 | 0.067682 | 20.15 |
| 600703 | 2015 | -0.4  | 0.12 | 0.918871 | 0.84432391 | 23.75724 | 0.109365 | 29.76 |
| 553    | 2015 | 0.013 | 0.12 | 0.918871 | 0.84432391 | 21.81427 | 0.067682 | 20.15 |
| 600703 | 2015 | 0.296 | 0.12 | 0.918871 | 0.84432391 | 23.33008 | 0.109365 | 29.76 |
| 2217   | 2015 | -0.53 | 0.11 | 0.878156 | 0.77115861 | 22.93753 | 0.039252 | 21.64 |
| 2217   | 2015 | -0.55 | 0.11 | 0.878156 | 0.77115861 | 22.93753 | 0.039252 | 21.64 |
| 2217   | 2015 | -0.51 | 0.11 | 0.878156 | 0.77115861 | 22.93753 | 0.039252 | 21.64 |
| 2217   | 2015 | -0.53 | 0.11 | 0.878156 | 0.77115861 | 22.93753 | 0.039252 | 21.64 |
| 2217   | 2015 | -0.7  | 0.11 | 0.878156 | 0.77115861 | 22.93753 | 0.039252 | 21.64 |
| 2217   | 2015 | -0.26 | 0.11 | 0.878156 | 0.77115861 | 22.93753 | 0.039252 | 21.64 |
| 2217   | 2015 | 0.624 | 0.11 | 0.878156 | 0.77115861 | 22.93753 | 0.039252 | 21.64 |
| 2217   | 2015 | 0.624 | 0.11 | 0.878156 | 0.77115861 | 22.93753 | 0.039252 | 21.64 |
| 2217   | 2015 | -0.51 | 0.11 | 0.878156 | 0.77115861 | 22.76059 | 0.039252 | 21.64 |
| 751    | 2015 | 0.331 | 0.01 | 0.693147 | 0.48045301 | 22.01605 | 0.045225 | 23.59 |
| 751    | 2015 | 0.331 | 0.01 | 0.693147 | 0.48045301 | 22.01437 | 0.045225 | 23.59 |
| 751    | 2015 | 0.331 | 0.01 | 0.693147 | 0.48045301 | 22.01605 | 0.045225 | 23.59 |
| 2005   | 2015 | -0.09 | 0.09 | 0.850352 | 0.72309885 | 23.32086 | 0.002359 | 22.58 |
| 600552 | 2015 | 0.4   | 0.09 | 0.850352 | 0.72309885 | 22.2496  | 0.051802 | 21.74 |
| 2005   | 2015 | -0.21 | 0.09 | 0.850352 | 0.72309885 | 23.32086 | 0.002359 | 22.58 |
| 2005   | 2015 | -0.31 | 0.09 | 0.850352 | 0.72309885 | 23.32086 | 0.002359 | 22.58 |
| 600552 | 2015 | 0.594 | 0.09 | 0.850352 | 0.72309885 | 22.2496  | 0.051802 | 21.74 |
| 600552 | 2015 | 0.381 | 0.09 | 0.850352 | 0.72309885 | 22.2496  | 0.051802 | 21.74 |
| 600552 | 2015 | 0.348 | 0.09 | 0.850352 | 0.72309885 | 22.2496  | 0.051802 | 21.74 |
| 930    | 2015 | 0.476 | 0.09 | 0.850352 | 0.72309885 | 22.4546  | -0.4336  | 15.76 |
| 600552 | 2015 | 0.376 | 0.09 | 0.850352 | 0.72309885 | 22.2496  | 0.051802 | 21.74 |
| 2005   | 2015 | -0.05 | 0.09 | 0.850352 | 0.72309885 | 23.32086 | 0.002359 | 22.58 |
| 600502 | 2015 | -0.5  | 0.09 | 0.850352 | 0.72309885 | 23.33143 | 0.08974  | 16.07 |

|        |      |       |      |          |            |          |          |       |
|--------|------|-------|------|----------|------------|----------|----------|-------|
| 2005   | 2015 | -0.29 | 0.09 | 0.850352 | 0.72309885 | 23.32086 | 0.002359 | 22.58 |
| 2005   | 2015 | -0.29 | 0.09 | 0.850352 | 0.72309885 | 23.32086 | 0.002359 | 22.58 |
| 600552 | 2015 | 0.392 | 0.09 | 0.850352 | 0.72309885 | 22.2496  | 0.051802 | 21.74 |
| 930    | 2015 | 0.476 | 0.09 | 0.850352 | 0.72309885 | 22.4546  | -0.4336  | 15.76 |
| 600502 | 2015 | -0.5  | 0.09 | 0.850352 | 0.72309885 | 23.20744 | 0.08974  | 16.07 |
| 2005   | 2015 | -0.54 | 0.09 | 0.850352 | 0.72309885 | 23.32086 | 0.002359 | 22.58 |
| 2005   | 2015 | -0.21 | 0.09 | 0.850352 | 0.72309885 | 23.32086 | 0.002359 | 22.58 |
| 600552 | 2015 | 0.348 | 0.09 | 0.850352 | 0.72309885 | 22.2496  | 0.051802 | 21.74 |
| 600552 | 2015 | -0.2  | 0.09 | 0.850352 | 0.72309885 | 22.2496  | 0.051802 | 21.74 |
| 2005   | 2015 | -0.29 | 0.09 | 0.850352 | 0.72309885 | 23.32086 | 0.002359 | 22.58 |
| 2005   | 2015 | -0.05 | 0.09 | 0.850352 | 0.72309885 | 23.32086 | 0.002359 | 22.58 |
| 930    | 2015 | 0.476 | 0.09 | 0.850352 | 0.72309885 | 22.4546  | -0.4336  | 15.76 |
| 930    | 2015 | 0.476 | 0.09 | 0.850352 | 0.72309885 | 22.4546  | -0.4336  | 15.76 |
| 2005   | 2015 | -0.21 | 0.09 | 0.850352 | 0.72309885 | 23.32086 | 0.002359 | 22.58 |
| 930    | 2015 | 0.476 | 0.09 | 0.850352 | 0.72309885 | 22.4546  | -0.4336  | 15.76 |
| 2005   | 2015 | -0.29 | 0.09 | 0.850352 | 0.72309885 | 23.32086 | 0.002359 | 22.58 |
| 930    | 2015 | 0.476 | 0.09 | 0.850352 | 0.72309885 | 22.4546  | -0.4336  | 15.76 |
| 600502 | 2015 | -0.5  | 0.09 | 0.850352 | 0.72309885 | 23.33143 | 0.08974  | 16.07 |
| 930    | 2015 | 0.476 | 0.09 | 0.850352 | 0.72309885 | 22.4546  | -0.4336  | 15.76 |
| 2005   | 2015 | -0.54 | 0.09 | 0.850352 | 0.72309885 | 23.32086 | 0.002359 | 22.58 |
| 2005   | 2015 | -0.54 | 0.09 | 0.850352 | 0.72309885 | 23.32086 | 0.002359 | 22.58 |
| 2005   | 2015 | -0.21 | 0.09 | 0.850352 | 0.72309885 | 23.32086 | 0.002359 | 22.58 |
| 930    | 2015 | 0.476 | 0.09 | 0.850352 | 0.72309885 | 22.35563 | -0.4336  | 15.76 |
| 600552 | 2015 | 0.4   | 0.09 | 0.850352 | 0.72309885 | 22.2496  | 0.051802 | 21.74 |
| 600502 | 2015 | -0.5  | 0.09 | 0.850352 | 0.72309885 | 23.33143 | 0.08974  | 16.07 |
| 600502 | 2015 | -0.5  | 0.09 | 0.850352 | 0.72309885 | 23.33143 | 0.08974  | 16.07 |
| 2005   | 2015 | -0.21 | 0.09 | 0.850352 | 0.72309885 | 23.06786 | 0.002359 | 22.58 |
| 600552 | 2015 | 0.348 | 0.09 | 0.850352 | 0.72309885 | 22.2496  | 0.051802 | 21.74 |
| 600552 | 2015 | 0.329 | 0.09 | 0.850352 | 0.72309885 | 21.4927  | 0.051802 | 21.74 |
| 2005   | 2015 | -0.09 | 0.09 | 0.850352 | 0.72309885 | 23.32086 | 0.002359 | 22.58 |
| 2005   | 2015 | -0.54 | 0.09 | 0.850352 | 0.72309885 | 23.32086 | 0.002359 | 22.58 |
| 600559 | 2015 | -0.3  | 0.02 | 1.366543 | 1.8674407  | 21.61202 | 0.04864  | 28.85 |
| 600559 | 2015 | -0.3  | 0.02 | 1.366543 | 1.8674407  | 21.75378 | 0.04864  | 28.85 |
| 600559 | 2015 | -0.3  | 0.02 | 1.366543 | 1.8674407  | 21.75378 | 0.04864  | 28.85 |
| 600160 | 2015 | -0.01 | 0.12 | 0.990063 | 0.98022473 | 22.94172 | 0.022563 | 55.86 |
| 600160 | 2015 | -0.16 | 0.12 | 0.990063 | 0.98022473 | 22.94172 | 0.022563 | 55.86 |
| 2061   | 2015 | -0.06 | 0.12 | 0.990063 | 0.98022473 | 21.64911 | -0.20822 | 30.22 |
| 2061   | 2015 | -0.32 | 0.12 | 0.990063 | 0.98022473 | 21.64911 | -0.20822 | 30.22 |
| 2061   | 2015 | -0.06 | 0.12 | 0.990063 | 0.98022473 | 21.32923 | -0.20822 | 30.22 |
| 300257 | 2015 | -0.49 | 0.12 | 0.990063 | 0.98022473 | 22.16435 | 0.05314  | 55.94 |
| 2061   | 2015 | -0.32 | 0.12 | 0.990063 | 0.98022473 | 21.64911 | -0.20822 | 30.22 |
| 300257 | 2015 | -0.49 | 0.12 | 0.990063 | 0.98022473 | 22.16435 | 0.05314  | 55.94 |
| 600160 | 2015 | -0.71 | 0.12 | 0.990063 | 0.98022473 | 22.94172 | 0.022563 | 55.86 |
| 300257 | 2015 | -0.75 | 0.12 | 0.990063 | 0.98022473 | 22.16435 | 0.05314  | 55.94 |
| 300257 | 2015 | -0.49 | 0.12 | 0.990063 | 0.98022473 | 22.16435 | 0.05314  | 55.94 |
| 600160 | 2015 | -0.71 | 0.12 | 0.990063 | 0.98022473 | 22.94172 | 0.022563 | 55.86 |
| 600160 | 2015 | 0.167 | 0.12 | 0.990063 | 0.98022473 | 22.94172 | 0.022563 | 55.86 |
| 300257 | 2015 | -0.75 | 0.12 | 0.990063 | 0.98022473 | 22.16435 | 0.05314  | 55.94 |
| 600160 | 2015 | -0.16 | 0.12 | 0.990063 | 0.98022473 | 22.94172 | 0.022563 | 55.86 |
| 600160 | 2015 | -0.16 | 0.12 | 0.990063 | 0.98022473 | 22.94172 | 0.022563 | 55.86 |
| 300257 | 2015 | -0.57 | 0.12 | 0.990063 | 0.98022473 | 22.16435 | 0.05314  | 55.94 |
| 300257 | 2015 | -0.49 | 0.12 | 0.990063 | 0.98022473 | 22.16435 | 0.05314  | 55.94 |
| 600160 | 2015 | -0.27 | 0.12 | 0.990063 | 0.98022473 | 22.94172 | 0.022563 | 55.86 |
| 600160 | 2015 | -0.16 | 0.12 | 0.990063 | 0.98022473 | 22.94172 | 0.022563 | 55.86 |

|        |      |       |      |          |            |          |          |       |
|--------|------|-------|------|----------|------------|----------|----------|-------|
| 300257 | 2015 | -0.57 | 0.12 | 0.990063 | 0.98022473 | 22.12015 | 0.05314  | 55.94 |
| 600160 | 2015 | -0.18 | 0.12 | 0.990063 | 0.98022473 | 22.94172 | 0.022563 | 55.86 |
| 600160 | 2015 | 0.167 | 0.12 | 0.990063 | 0.98022473 | 22.94172 | 0.022563 | 55.86 |
| 600160 | 2015 | -0.16 | 0.12 | 0.990063 | 0.98022473 | 22.94172 | 0.022563 | 55.86 |
| 600160 | 2015 | 0.511 | 0.12 | 0.990063 | 0.98022473 | 22.94172 | 0.022563 | 55.86 |
| 2061   | 2015 | -0.24 | 0.12 | 0.990063 | 0.98022473 | 21.64911 | -0.20822 | 30.22 |
| 300257 | 2015 | -0.49 | 0.12 | 0.990063 | 0.98022473 | 22.16435 | 0.05314  | 55.94 |
| 600160 | 2015 | -0.15 | 0.12 | 0.990063 | 0.98022473 | 22.94172 | 0.022563 | 55.86 |
| 600160 | 2015 | 0.511 | 0.12 | 0.990063 | 0.98022473 | 22.7932  | 0.022563 | 55.86 |
| 600343 | 2015 | -0.11 | 0.04 | 0.092976 | 0.00864447 | 22.12924 | 0.020985 | 28.78 |
| 300164 | 2015 | -0.63 | 0.04 | 0.092976 | 0.00864447 | 21.42859 | -0.02406 | 27.41 |
| 2149   | 2015 | 0.239 | 0.04 | 0.092976 | 0.00864447 | 21.77643 | -0.17789 | 35.19 |
| 300164 | 2015 | 0.692 | 0.04 | 0.092976 | 0.00864447 | 21.42859 | -0.02406 | 27.41 |
| 600343 | 2015 | -0.23 | 0.04 | 0.092976 | 0.00864447 | 22.12924 | 0.020985 | 28.78 |
| 600343 | 2015 | -0.38 | 0.04 | 0.092976 | 0.00864447 | 22.12924 | 0.020985 | 28.78 |
| 300164 | 2015 | 0.692 | 0.04 | 0.092976 | 0.00864447 | 21.42859 | -0.02406 | 27.41 |
| 601369 | 2015 | -0.26 | 0.04 | 0.092976 | 0.00864447 | 23.39795 | 0.052904 | 58.57 |
| 600893 | 2015 | -0.22 | 0.04 | 0.092976 | 0.00864447 | 24.58647 | 0.059033 | 30.61 |
| 600893 | 2015 | -0.3  | 0.04 | 0.092976 | 0.00864447 | 24.58647 | 0.059033 | 30.61 |
| 600248 | 2015 | -0.26 | 0.04 | 0.092976 | 0.00864447 | 22.33822 | 0.066357 | 53.03 |
| 600893 | 2015 | -0.07 | 0.04 | 0.092976 | 0.00864447 | 24.58647 | 0.059033 | 30.61 |
| 300116 | 2015 | -0.68 | 0.04 | 0.092976 | 0.00864447 | 21.09768 | 0.038522 | 31.36 |
| 2149   | 2015 | 0.337 | 0.04 | 0.092976 | 0.00864447 | 21.77643 | -0.17789 | 35.19 |
| 300116 | 2015 | -0.68 | 0.04 | 0.092976 | 0.00864447 | 21.09768 | 0.038522 | 31.36 |
| 2267   | 2015 | -0.94 | 0.04 | 0.092976 | 0.00864447 | 23.03583 | 0.11575  | 55.36 |
| 601179 | 2015 | 0.595 | 0.04 | 0.092976 | 0.00864447 | 24.20628 | 0.046775 | 50.56 |
| 601012 | 2015 | 0.318 | 0.04 | 0.092976 | 8.64E-03   | 22.74993 | 0.092104 | 16.85 |
| 601012 | 2015 | -0.11 | 0.04 | 0.092976 | 8.64E-03   | 22.74993 | 0.092104 | 16.85 |
| 600893 | 2015 | -0.88 | 0.04 | 0.092976 | 8.64E-03   | 24.58647 | 0.059033 | 30.61 |
| 2149   | 2015 | 0.239 | 0.04 | 0.092976 | 8.64E-03   | 21.77643 | -0.17789 | 35.19 |
| 600893 | 2015 | -0.49 | 0.04 | 0.092976 | 8.64E-03   | 24.58647 | 0.059033 | 30.61 |
| 600893 | 2015 | -0.44 | 0.04 | 0.092976 | 8.64E-03   | 23.76593 | 0.059033 | 30.61 |
| 600893 | 2015 | -0.37 | 0.04 | 0.092976 | 8.64E-03   | 24.58647 | 0.059033 | 30.61 |
| 300116 | 2015 | -0.68 | 0.04 | 0.092976 | 8.64E-03   | 21.09768 | 0.038522 | 31.36 |
| 300116 | 2015 | -0.68 | 0.04 | 0.092976 | 8.64E-03   | 21.09768 | 0.038522 | 31.36 |
| 300164 | 2015 | -0.63 | 0.04 | 0.092976 | 0.00864447 | 21.42859 | -0.02406 | 27.41 |
| 601179 | 2015 | -0.73 | 0.04 | 0.092976 | 0.00864447 | 24.20628 | 0.046775 | 50.56 |
| 300023 | 2015 | -0.23 | 0.04 | 0.092976 | 0.00864447 | 20.86117 | 0.062854 | 42.99 |
| 600343 | 2015 | -0.38 | 0.04 | 0.092976 | 0.00864447 | 22.12924 | 0.020985 | 28.78 |
| 600707 | 2015 | 0.921 | 0.04 | 0.092976 | 0.00864447 | 22.18725 | 0.024693 | 24.6  |
| 300397 | 2015 | 0.742 | 0.04 | 0.092976 | 0.00864447 | 21.20615 | -0.04254 | 39.9  |
| 600302 | 2015 | -0.52 | 0.04 | 0.092976 | 0.00864447 | 21.20168 | 0.0407   | 42.77 |
| 300140 | 2015 | -0.29 | 0.04 | 0.092976 | 0.00864447 | 20.87003 | 0.014809 | 29.85 |
| 601012 | 2015 | -0.11 | 0.04 | 0.092976 | 0.00864447 | 22.74993 | 0.092104 | 16.85 |
| 600302 | 2015 | -0.48 | 0.04 | 0.092976 | 0.00864447 | 21.20168 | 0.0407   | 42.77 |
| 300140 | 2015 | -0.11 | 0.04 | 0.092976 | 0.00864447 | 20.87003 | 0.014809 | 29.85 |
| 2149   | 2015 | 0.926 | 0.04 | 0.092976 | 0.00864447 | 21.27037 | -0.17789 | 35.19 |
| 2149   | 2015 | -0.02 | 0.04 | 0.092976 | 0.00864447 | 21.77643 | -0.17789 | 35.19 |
| 600455 | 2015 | -0.19 | 0.04 | 0.092976 | 0.00864447 | 20.33668 | 0.033398 | 20.4  |
| 300103 | 2015 | -0.5  | 0.04 | 0.092976 | 0.00864447 | 20.73388 | 0.044902 | 29.95 |
| 600984 | 2015 | -0.29 | 0.04 | 0.092976 | 0.00864447 | 22.35822 | 0.001958 | 21.25 |
| 600707 | 2015 | 0.921 | 0.04 | 0.092976 | 0.00864447 | 22.18725 | 0.024693 | 24.6  |
| 300397 | 2015 | 0.742 | 0.04 | 0.092976 | 0.00864447 | 20.71953 | -0.04254 | 39.9  |
| 601179 | 2015 | -0.73 | 0.04 | 0.092976 | 8.64E-03   | 24.20628 | 0.046775 | 50.56 |



|        |      |       |      |          |            |          |          |       |
|--------|------|-------|------|----------|------------|----------|----------|-------|
| 601179 | 2015 | -0.38 | 0.04 | 0.092976 | 8.64E-03   | 24.20628 | 0.046775 | 50.56 |
| 2267   | 2015 | -0.94 | 0.04 | 0.092976 | 8.64E-03   | 22.97133 | 0.11575  | 55.36 |
| 601012 | 2015 | -0.58 | 0.04 | 0.092976 | 8.64E-03   | 22.74993 | 0.092104 | 16.85 |
| 600343 | 2015 | -0.36 | 0.04 | 0.092976 | 8.64E-03   | 22.12924 | 0.020985 | 28.78 |
| 300397 | 2015 | 0.742 | 0.04 | 0.092976 | 8.64E-03   | 21.20615 | -0.04254 | 39.9  |
| 601012 | 2015 | -0.56 | 0.04 | 0.092976 | 8.64E-03   | 22.74993 | 0.092104 | 16.85 |
| 600893 | 2015 | -0.55 | 0.04 | 0.092976 | 8.64E-03   | 24.58647 | 0.059033 | 30.61 |
| 600893 | 2015 | -0.88 | 0.04 | 0.092976 | 8.64E-03   | 24.58647 | 0.059033 | 30.61 |
| 768    | 2015 | -0.2  | 0.04 | 0.092976 | 8.64E-03   | 24.34665 | 0.027192 | 38.18 |
| 601369 | 2015 | -0.26 | 0.04 | 0.092976 | 0.00864447 | 23.39795 | 0.052904 | 58.57 |
| 601012 | 2015 | -0.48 | 0.04 | 0.092976 | 0.00864447 | 22.74993 | 0.092104 | 16.85 |
| 768    | 2015 | -0.33 | 0.04 | 0.092976 | 0.00864447 | 24.17565 | 0.027192 | 38.18 |
| 601369 | 2015 | -0.26 | 0.04 | 0.092976 | 0.00864447 | 23.39795 | 0.052904 | 58.57 |
| 601369 | 2015 | -0.26 | 0.04 | 0.092976 | 0.00864447 | 23.39795 | 0.052904 | 58.57 |
| 600893 | 2015 | -0.45 | 0.04 | 0.092976 | 0.00864447 | 24.58647 | 0.059033 | 30.61 |
| 600248 | 2015 | -0.26 | 0.04 | 0.092976 | 0.00864447 | 22.33822 | 0.066357 | 53.03 |
| 768    | 2015 | -0.33 | 0.04 | 0.092976 | 0.00864447 | 24.17565 | 0.027192 | 38.18 |
| 601179 | 2015 | 0.595 | 0.04 | 0.092976 | 0.00864447 | 24.20628 | 0.046775 | 50.56 |
| 600343 | 2015 | -0.31 | 0.04 | 0.092976 | 0.00864447 | 22.12924 | 0.020985 | 28.78 |
| 300023 | 2015 | -0.23 | 0.04 | 0.092976 | 0.00864447 | 22.23984 | 0.062854 | 42.99 |
| 600984 | 2015 | -0.29 | 0.04 | 0.092976 | 0.00864447 | 22.35822 | 0.001958 | 21.25 |
| 601179 | 2015 | -0.09 | 0.04 | 0.092976 | 0.00864447 | 24.20628 | 0.046775 | 50.56 |
| 600984 | 2015 | -0.29 | 0.04 | 0.092976 | 0.00864447 | 22.35822 | 0.001958 | 21.25 |
| 300140 | 2015 | -0.3  | 0.04 | 0.092976 | 0.00864447 | 20.87003 | 0.014809 | 29.85 |
| 600893 | 2015 | -0.56 | 0.04 | 0.092976 | 0.00864447 | 24.58647 | 0.059033 | 30.61 |
| 601179 | 2015 | -0.67 | 0.04 | 0.092976 | 0.00864447 | 24.20628 | 0.046775 | 50.56 |
| 300103 | 2015 | -0.5  | 0.04 | 0.092976 | 0.00864447 | 20.73388 | 0.044902 | 29.95 |
| 600893 | 2015 | -0.25 | 0.04 | 0.092976 | 0.00864447 | 24.58647 | 0.059033 | 30.61 |
| 768    | 2015 | -0.31 | 0.04 | 0.092976 | 0.00864447 | 24.17565 | 0.027192 | 38.18 |
| 600984 | 2015 | -0.67 | 0.04 | 0.092976 | 0.00864447 | 22.35822 | 0.001958 | 21.25 |
| 601179 | 2015 | 0.595 | 0.04 | 0.092976 | 0.00864447 | 24.20628 | 0.046775 | 50.56 |
| 601179 | 2015 | -0.24 | 0.04 | 0.092976 | 0.00864447 | 24.20628 | 0.046775 | 50.56 |
| 600707 | 2015 | 0.921 | 0.04 | 0.092976 | 0.00864447 | 22.54    | 0.024693 | 24.6  |
| 600893 | 2015 | -0.33 | 0.04 | 0.092976 | 0.00864447 | 24.58647 | 0.059033 | 30.61 |
| 600302 | 2015 | -0.48 | 0.04 | 0.092976 | 0.00864447 | 21.20168 | 0.0407   | 42.77 |
| 600893 | 2015 | -0.31 | 0.04 | 0.092976 | 0.00864447 | 24.58647 | 0.059033 | 30.61 |
| 601179 | 2015 | -0.4  | 0.04 | 0.092976 | 0.00864447 | 24.20628 | 0.046775 | 50.56 |
| 601179 | 2015 | -0.19 | 0.04 | 0.092976 | 0.00864447 | 24.20628 | 0.046775 | 50.56 |
| 300023 | 2015 | -0.23 | 0.04 | 0.092976 | 0.00864447 | 22.23984 | 0.062854 | 42.99 |
| 300164 | 2015 | -0.54 | 0.04 | 0.092976 | 0.00864447 | 21.42859 | -0.02406 | 27.41 |
| 2149   | 2015 | 0.146 | 0.04 | 0.092976 | 0.00864447 | 21.77643 | -0.17789 | 35.19 |
| 600707 | 2015 | 0.921 | 0.04 | 0.092976 | 0.00864447 | 22.18725 | 0.024693 | 24.6  |
| 300140 | 2015 | -0.3  | 0.04 | 0.092976 | 0.00864447 | 20.87003 | 0.014809 | 29.85 |
| 600248 | 2015 | -0.26 | 0.04 | 0.092976 | 0.00864447 | 22.33822 | 0.066357 | 53.03 |
| 300116 | 2015 | -0.68 | 0.04 | 0.092976 | 0.00864447 | 20.75486 | 0.038522 | 31.36 |
| 600248 | 2015 | -0.26 | 0.04 | 0.092976 | 0.00864447 | 20.89533 | 0.066357 | 53.03 |
| 600984 | 2015 | -0.18 | 0.04 | 0.092976 | 0.00864447 | 22.35822 | 0.001958 | 21.25 |
| 600984 | 2015 | -0.67 | 0.04 | 0.092976 | 0.00864447 | 22.35822 | 0.001958 | 21.25 |
| 300116 | 2015 | -0.68 | 0.04 | 0.092976 | 0.00864447 | 21.09768 | 0.038522 | 31.36 |
| 300397 | 2015 | 0.742 | 0.04 | 0.092976 | 0.00864447 | 21.20615 | -0.04254 | 39.9  |
| 600984 | 2015 | -0.67 | 0.04 | 0.092976 | 0.00864447 | 22.35822 | 0.001958 | 21.25 |
| 600984 | 2015 | -0.67 | 0.04 | 0.092976 | 0.00864447 | 22.35822 | 0.001958 | 21.25 |
| 600343 | 2015 | -0.38 | 0.04 | 0.092976 | 0.00864447 | 22.12924 | 0.020985 | 28.78 |
| 600455 | 2015 | -0.19 | 0.04 | 0.092976 | 0.00864447 | 20.10336 | 0.033398 | 20.4  |

|        |      |       |      |          |            |          |          |       |
|--------|------|-------|------|----------|------------|----------|----------|-------|
| 2149   | 2015 | 0.183 | 0.04 | 0.092976 | 0.00864447 | 21.77643 | -0.17789 | 35.19 |
| 600893 | 2015 | -0.24 | 0.04 | 0.092976 | 0.00864447 | 24.58647 | 0.059033 | 30.61 |
| 300023 | 2015 | -0.23 | 0.04 | 0.092976 | 0.00864447 | 22.23984 | 0.062854 | 42.99 |
| 300140 | 2015 | -0.19 | 0.04 | 0.092976 | 0.00864447 | 20.5604  | 0.014809 | 29.85 |
| 600893 | 2015 | -0.33 | 0.04 | 0.092976 | 0.00864447 | 24.58647 | 0.059033 | 30.61 |
| 600893 | 2015 | -0.88 | 0.04 | 0.092976 | 0.00864447 | 24.58647 | 0.059033 | 30.61 |
| 300164 | 2015 | -0.63 | 0.04 | 0.092976 | 0.00864447 | 21.18419 | -0.02406 | 27.41 |
| 601179 | 2015 | -0.4  | 0.04 | 0.092976 | 0.00864447 | 24.20628 | 0.046775 | 50.56 |
| 601369 | 2015 | -0.26 | 0.04 | 0.092976 | 0.00864447 | 23.25718 | 0.052904 | 58.57 |
| 601179 | 2015 | 0.193 | 0.04 | 0.092976 | 0.00864447 | 24.20628 | 0.046775 | 50.56 |
| 600893 | 2015 | -0.42 | 0.04 | 0.092976 | 0.00864447 | 24.58647 | 0.059033 | 30.61 |
| 601179 | 2015 | -0.53 | 0.04 | 0.092976 | 0.00864447 | 24.20628 | 0.046775 | 50.56 |
| 601179 | 2015 | -0.33 | 0.04 | 0.092976 | 0.00864447 | 24.20628 | 0.046775 | 50.56 |
| 601369 | 2015 | -0.26 | 0.04 | 0.092976 | 8.64E-03   | 23.39795 | 0.052904 | 58.57 |
| 601369 | 2015 | -0.26 | 0.04 | 0.092976 | 8.64E-03   | 23.39795 | 0.052904 | 58.57 |
| 300023 | 2015 | -0.23 | 0.04 | 0.092976 | 8.64E-03   | 22.23984 | 0.062854 | 42.99 |
| 2267   | 2015 | -0.94 | 0.04 | 0.092976 | 8.64E-03   | 23.03583 | 0.11575  | 55.36 |
| 600984 | 2015 | -0.67 | 0.04 | 0.092976 | 8.64E-03   | 22.35822 | 0.001958 | 21.25 |
| 300140 | 2015 | 0.262 | 0.04 | 0.092976 | 8.64E-03   | 20.87003 | 0.014809 | 29.85 |
| 600893 | 2015 | -0.45 | 0.04 | 0.092976 | 8.64E-03   | 24.58647 | 0.059033 | 30.61 |
| 300397 | 2015 | 0.742 | 0.04 | 0.092976 | 8.64E-03   | 21.20615 | -0.04254 | 39.9  |
| 600343 | 2015 | -0.11 | 0.04 | 0.092976 | 8.64E-03   | 22.12924 | 0.020985 | 28.78 |
| 600893 | 2015 | -0.21 | 0.04 | 0.092976 | 8.64E-03   | 24.58647 | 0.059033 | 30.61 |
| 601179 | 2015 | 0.595 | 0.04 | 0.092976 | 0.00864447 | 24.20628 | 0.046775 | 50.56 |
| 601179 | 2015 | 0.595 | 0.04 | 0.092976 | 0.00864447 | 24.20628 | 0.046775 | 50.56 |
| 600343 | 2015 | 0.085 | 0.04 | 0.092976 | 0.00864447 | 22.12924 | 0.020985 | 28.78 |
| 2267   | 2015 | -0.94 | 0.04 | 0.092976 | 0.00864447 | 23.03583 | 0.11575  | 55.36 |
| 601012 | 2015 | -0.68 | 0.04 | 0.092976 | 0.00864447 | 23.04651 | 0.092104 | 16.85 |
| 600893 | 2015 | -0.67 | 0.04 | 0.092976 | 0.00864447 | 24.58647 | 0.059033 | 30.61 |
| 2149   | 2015 | 0.926 | 0.04 | 0.092976 | 0.00864447 | 21.77643 | -0.17789 | 35.19 |
| 600984 | 2015 | -0.67 | 0.04 | 0.092976 | 0.00864447 | 22.35822 | 0.001958 | 21.25 |
| 600893 | 2015 | -0.3  | 0.04 | 0.092976 | 0.00864447 | 24.58647 | 0.059033 | 30.61 |
| 300397 | 2015 | 0.742 | 0.04 | 0.092976 | 0.00864447 | 21.20615 | -0.04254 | 39.9  |
| 600984 | 2015 | -0.57 | 0.04 | 0.092976 | 0.00864447 | 21.92233 | 0.001958 | 21.25 |
| 600984 | 2015 | -0.67 | 0.04 | 0.092976 | 0.00864447 | 22.35822 | 0.001958 | 21.25 |
| 768    | 2015 | -0.33 | 0.04 | 0.092976 | 0.00864447 | 24.17565 | 0.027192 | 38.18 |
| 600302 | 2015 | -0.49 | 0.04 | 0.092976 | 0.00864447 | 21.20168 | 0.0407   | 42.77 |
| 600984 | 2015 | -0.55 | 0.04 | 0.092976 | 0.00864447 | 22.35822 | 0.001958 | 21.25 |
| 601179 | 2015 | 0.595 | 0.04 | 0.092976 | 0.00864447 | 24.20628 | 0.046775 | 50.56 |
| 600984 | 2015 | -0.67 | 0.04 | 0.092976 | 0.00864447 | 22.35822 | 0.001958 | 21.25 |
| 300103 | 2015 | -0.5  | 0.04 | 0.092976 | 0.00864447 | 20.73388 | 0.044902 | 29.95 |
| 2267   | 2015 | -0.94 | 0.04 | 0.092976 | 0.00864447 | 23.03583 | 0.11575  | 55.36 |
| 601012 | 2015 | -0.01 | 0.04 | 0.092976 | 0.00864447 | 22.74993 | 0.092104 | 16.85 |
| 600893 | 2015 | -0.62 | 0.04 | 0.092976 | 0.00864447 | 24.58647 | 0.059033 | 30.61 |
| 600984 | 2015 | -0.29 | 0.04 | 0.092976 | 0.00864447 | 22.35822 | 0.001958 | 21.25 |
| 600343 | 2015 | -0.53 | 0.04 | 0.092976 | 0.00864447 | 21.72198 | 0.020985 | 28.78 |
| 600302 | 2015 | -0.47 | 0.04 | 0.092976 | 0.00864447 | 21.20168 | 0.0407   | 42.77 |
| 600455 | 2015 | -0.19 | 0.04 | 0.092976 | 0.00864447 | 20.33668 | 0.033398 | 20.4  |
| 601012 | 2015 | -0.61 | 0.04 | 0.092976 | 0.00864447 | 22.74993 | 0.092104 | 16.85 |
| 2149   | 2015 | -0.08 | 0.04 | 0.092976 | 0.00864447 | 21.77643 | -0.17789 | 35.19 |
| 601179 | 2015 | -0.73 | 0.04 | 0.092976 | 0.00864447 | 23.75996 | 0.046775 | 50.56 |
| 600302 | 2015 | -0.57 | 0.04 | 0.092976 | 0.00864447 | 21.00987 | 0.0407   | 42.77 |
| 768    | 2015 | -0.31 | 0.04 | 0.092976 | 0.00864447 | 24.17565 | 0.027192 | 38.18 |
| 600984 | 2015 | -0.67 | 0.04 | 0.092976 | 0.00864447 | 22.35822 | 0.001958 | 21.25 |

|        |      |       |      |          |            |          |          |       |
|--------|------|-------|------|----------|------------|----------|----------|-------|
| 2267   | 2015 | -0.94 | 0.04 | 0.092976 | 0.00864447 | 23.03583 | 0.11575  | 55.36 |
| 601012 | 2015 | -0.42 | 0.04 | 0.092976 | 0.00864447 | 22.74993 | 0.092104 | 16.85 |
| 600707 | 2015 | 0.921 | 0.04 | 0.092976 | 0.00864447 | 22.18725 | 0.024693 | 24.6  |
| 300164 | 2015 | -0.54 | 0.04 | 0.092976 | 0.00864447 | 21.42859 | -0.02406 | 27.41 |
| 833    | 2015 | -0.77 | 0.1  | 0.405465 | 0.16440195 | 21.94869 | 0.051004 | 31.31 |
| 833    | 2015 | -0.77 | 0.1  | 0.405465 | 0.16440195 | 21.94869 | 0.051004 | 31.31 |
| 833    | 2015 | -0.77 | 0.1  | 0.405465 | 0.16440195 | 21.94869 | 0.051004 | 31.31 |
| 833    | 2015 | -0.77 | 0.1  | 0.405465 | 0.16440195 | 21.76394 | 0.051004 | 31.31 |
| 833    | 2015 | -0.77 | 0.1  | 0.405465 | 0.16440195 | 21.94869 | 0.051004 | 31.31 |
| 2378   | 2015 | -0.22 | 0.08 | 0.822077 | 0.67581018 | 21.94868 | -0.08387 | 70.53 |
| 2378   | 2015 | 0.054 | 0.08 | 0.822077 | 0.67581018 | 21.86285 | -0.08387 | 70.53 |
| 2378   | 2015 | 0.054 | 0.08 | 0.822077 | 0.67581018 | 21.86285 | -0.08387 | 70.53 |
| 829    | 2015 | -0.31 | 0.08 | 0.822077 | 0.67581018 | 23.1383  | -0.16221 | 13.93 |
| 2378   | 2015 | 0.119 | 0.08 | 0.822077 | 0.67581018 | 21.86285 | -0.08387 | 70.53 |
| 829    | 2015 | -0.36 | 0.08 | 0.822077 | 0.67581018 | 20.94151 | -0.16221 | 13.93 |
| 2378   | 2015 | 0.031 | 0.08 | 0.822077 | 0.67581018 | 21.86285 | -0.08387 | 70.53 |
| 829    | 2015 | -0.21 | 0.08 | 0.822077 | 0.67581018 | 23.1383  | -0.16221 | 13.93 |
| 829    | 2015 | -0.36 | 0.08 | 0.822077 | 0.67581018 | 23.1383  | -0.16221 | 13.93 |
| 829    | 2015 | -0.21 | 0.08 | 0.822077 | 0.67581018 | 23.1383  | -0.16221 | 13.93 |
| 2378   | 2015 | -0.22 | 0.08 | 0.822077 | 0.67581018 | 21.86285 | -0.08387 | 70.53 |
| 2378   | 2015 | 0.119 | 0.08 | 0.822077 | 0.67581018 | 21.86285 | -0.08387 | 70.53 |
| 600988 | 2015 | 0.336 | 0.01 | 0.897941 | 0.80629877 | 21.74274 | 0.10816  | 30.27 |
| 600988 | 2015 | -0.01 | 0.01 | 0.897941 | 0.80629877 | 21.95577 | 0.10816  | 30.27 |
| 600988 | 2015 | 0.304 | 0.01 | 0.897941 | 0.80629877 | 21.95577 | 0.10816  | 30.27 |
| 600988 | 2015 | 0.304 | 0.01 | 0.897941 | 0.80629877 | 21.95577 | 0.10816  | 30.27 |
| 737    | 2015 | -0.6  | 0    | 1.607468 | 2.5839539  | 21.82624 | -0.4336  | 25.69 |
| 737    | 2015 | -0.6  | 0    | 1.607468 | 2.5839539  | 21.82624 | -0.4336  | 25.69 |
| 600351 | 2015 | 0.431 | 0    | 1.607468 | 2.5839539  | 22.1281  | 0.081421 | 24.77 |
| 737    | 2015 | -0.6  | 0    | 1.607468 | 2.5839539  | 21.64723 | -0.4336  | 25.69 |
| 737    | 2015 | -0.6  | 0    | 1.607468 | 2.5839539  | 21.82624 | -0.4336  | 25.69 |
| 600351 | 2015 | -0.07 | 0    | 1.607468 | 2.5839539  | 22.17061 | 0.081421 | 24.77 |
| 600351 | 2015 | 0.431 | 0    | 1.607468 | 2.58E+00   | 22.17061 | 0.081421 | 24.77 |
| 737    | 2015 | -0.6  | 0    | 1.607468 | 2.58E+00   | 21.82624 | -0.4336  | 25.69 |
| 600351 | 2015 | 0.431 | 0    | 1.607468 | 2.58E+00   | 22.17061 | 0.081421 | 24.77 |
| 600351 | 2015 | 0.431 | 0    | 1.607468 | 2.58E+00   | 22.17061 | 0.081421 | 24.77 |
| 600351 | 2015 | 0.079 | 0    | 1.607468 | 2.58E+00   | 22.17061 | 0.081421 | 24.77 |
| 600351 | 2015 | -0.07 | 0    | 1.607468 | 2.5839539  | 22.17061 | 0.081421 | 24.77 |
| 737    | 2015 | -0.6  | 0    | 1.607468 | 2.5839539  | 21.82624 | -0.4336  | 25.69 |
| 600351 | 2015 | 0.431 | 0    | 1.607468 | 2.5839539  | 22.17061 | 0.081421 | 24.77 |
| 737    | 2015 | -0.6  | 0    | 1.607468 | 2.5839539  | 21.82624 | -0.4336  | 25.69 |
| 600276 | 2015 | 0.939 | 0.09 | 1.347414 | 1.8155244  | 23.16533 | 0.214715 | 24.3  |
| 603366 | 2015 | -0.41 | 0.09 | 1.347414 | 1.8155244  | 22.29235 | 0.072982 | 57.75 |
| 603366 | 2015 | -0.39 | 0.09 | 1.347414 | 1.8155244  | 22.29235 | 0.072982 | 57.75 |
| 603366 | 2015 | -0.42 | 0.09 | 1.347414 | 1.8155244  | 22.29235 | 0.072982 | 57.75 |
| 603688 | 2015 | -0.54 | 0.09 | 1.347414 | 1.8155244  | 20.90437 | 0.063567 | 29.48 |
| 600557 | 2015 | 0.694 | 0.09 | 1.347414 | 1.8155244  | 22.09582 | 0.127229 | 27.48 |
| 600276 | 2015 | 0.885 | 0.09 | 1.347414 | 1.8155244  | 23.16533 | 0.214715 | 24.3  |
| 603366 | 2015 | -0.42 | 0.09 | 1.347414 | 1.8155244  | 22.29235 | 0.072982 | 57.75 |
| 603366 | 2015 | -0.41 | 0.09 | 1.347414 | 1.8155244  | 22.29235 | 0.072982 | 57.75 |
| 600276 | 2015 | 0.901 | 0.09 | 1.347414 | 1.8155244  | 23.16533 | 0.214715 | 24.3  |
| 600557 | 2015 | 0.694 | 0.09 | 1.347414 | 1.8155244  | 22.18293 | 0.127229 | 27.48 |
| 600276 | 2015 | 0.405 | 0.09 | 1.347414 | 1.8155244  | 23.16533 | 0.214715 | 24.3  |
| 603366 | 2015 | -0.41 | 0.09 | 1.347414 | 1.8155244  | 22.29235 | 0.072982 | 57.75 |
| 603688 | 2015 | -0.54 | 0.09 | 1.347414 | 1.8155244  | 20.88023 | 0.063567 | 29.48 |

|        |      |       |      |          |           |          |          |       |
|--------|------|-------|------|----------|-----------|----------|----------|-------|
| 603688 | 2015 | -0.54 | 0.09 | 1.347414 | 1.8155244 | 20.90437 | 0.063567 | 29.48 |
| 600276 | 2015 | 0.895 | 0.09 | 1.347414 | 1.8155244 | 23.05292 | 0.214715 | 24.3  |
| 603688 | 2015 | -0.54 | 0.09 | 1.347414 | 1.8155244 | 20.90437 | 0.063567 | 29.48 |
| 603688 | 2015 | -0.54 | 0.09 | 1.347414 | 1.8155244 | 20.90437 | 0.063567 | 29.48 |
| 603366 | 2015 | -0.41 | 0.09 | 1.347414 | 1.8155244 | 22.29235 | 0.072982 | 57.75 |
| 603366 | 2015 | -0.46 | 0.09 | 1.347414 | 1.8155244 | 22.29235 | 0.072982 | 57.75 |
| 600276 | 2015 | 0.901 | 0.09 | 1.347414 | 1.8155244 | 23.16533 | 0.214715 | 24.3  |
| 603366 | 2015 | -0.41 | 0.09 | 1.347414 | 1.8155244 | 22.29235 | 0.072982 | 57.75 |
| 603366 | 2015 | -0.6  | 0.09 | 1.347414 | 1.8155244 | 22.32766 | 0.072982 | 57.75 |
| 603366 | 2015 | -0.36 | 0.09 | 1.347414 | 1.8155244 | 22.29235 | 0.072982 | 57.75 |
| 603366 | 2015 | -0.41 | 0.09 | 1.347414 | 1.8155244 | 22.29235 | 0.072982 | 57.75 |
| 603366 | 2015 | -0.41 | 0.09 | 1.347414 | 1.8155244 | 22.29235 | 0.072982 | 57.75 |
| 600557 | 2015 | 0.694 | 0.09 | 1.347414 | 1.8155244 | 22.18293 | 0.127229 | 27.48 |
| 2118   | 2015 | 0.491 | 0.27 | 1.338417 | 1.7913595 | 22.18312 | 0.019468 | 43.17 |
| 766    | 2015 | -0.3  | 0.27 | 1.338417 | 1.7913595 | 22.14774 | 0.003055 | 24.99 |
| 766    | 2015 | -0.3  | 0.27 | 1.338417 | 1.7913595 | 22.14774 | 0.003055 | 24.99 |
| 600867 | 2015 | 0.104 | 0.27 | 1.338417 | 1.7913595 | 22.05514 | 0.197685 | 37.18 |
| 2118   | 2015 | 0.491 | 0.27 | 1.338417 | 1.7913595 | 22.33233 | 0.019468 | 43.17 |
| 2118   | 2015 | 0.491 | 0.27 | 1.338417 | 1.7913595 | 22.33233 | 0.019468 | 43.17 |
| 2118   | 2015 | 0.491 | 0.27 | 1.338417 | 1.7913595 | 22.33233 | 0.019468 | 43.17 |
| 2118   | 2015 | 0.491 | 0.27 | 1.338417 | 1.7913595 | 22.33233 | 0.019468 | 43.17 |
| 766    | 2015 | 0.037 | 0.27 | 1.338417 | 1.7913595 | 22.14774 | 0.003055 | 24.99 |
| 2118   | 2015 | 0.491 | 0.27 | 1.338417 | 1.7913595 | 22.33233 | 0.019468 | 43.17 |
| 600867 | 2015 | 0.104 | 0.27 | 1.338417 | 1.7913595 | 22.05514 | 0.197685 | 37.18 |
| 600867 | 2015 | 0.104 | 0.27 | 1.338417 | 1.7913595 | 22.0651  | 0.197685 | 37.18 |
| 2118   | 2015 | 0.491 | 0.27 | 1.338417 | 1.7913595 | 22.33233 | 0.019468 | 43.17 |
| 766    | 2015 | 0.708 | 0.27 | 1.338417 | 1.7913595 | 22.11516 | 0.003055 | 24.99 |
| 766    | 2015 | 0.708 | 0.27 | 1.338417 | 1.7913595 | 22.14774 | 0.003055 | 24.99 |
| 2118   | 2015 | 0.491 | 0.27 | 1.338417 | 1.7913595 | 22.33233 | 0.019468 | 43.17 |
| 600867 | 2015 | 0.104 | 0.27 | 1.338417 | 1.7913595 | 22.05514 | 0.197685 | 37.18 |
| 600867 | 2015 | 0.104 | 0.27 | 1.338417 | 1.7913595 | 22.05514 | 0.197685 | 37.18 |
| 600867 | 2015 | 0.104 | 0.27 | 1.338417 | 1.7913595 | 22.05514 | 0.197685 | 37.18 |
| 2118   | 2015 | 0.491 | 0.27 | 1.338417 | 1.7913595 | 22.33233 | 0.019468 | 43.17 |
| 600867 | 2015 | 0.104 | 0.27 | 1.338417 | 1.7913595 | 22.05514 | 0.197685 | 37.18 |
| 766    | 2015 | 0.037 | 0.27 | 1.338417 | 1.7913595 | 22.14774 | 0.003055 | 24.99 |
| 600702 | 2015 | -0.91 | 0.04 | 1.432155 | 2.0510666 | 22.04804 | 0.003174 | 29.85 |
| 2466   | 2015 | -0.2  | 0.04 | 1.432155 | 2.0510666 | 22.74034 | 0.104572 | 35.84 |
| 2466   | 2015 | -0.21 | 0.04 | 1.432155 | 2.0510666 | 22.74034 | 0.104572 | 35.84 |
| 2466   | 2015 | -0.08 | 0.04 | 1.432155 | 2.0510666 | 22.74034 | 0.104572 | 35.84 |
| 2466   | 2015 | -0.08 | 0.04 | 1.432155 | 2.0510666 | 22.74034 | 0.104572 | 35.84 |
| 2466   | 2015 | -0.08 | 0.04 | 1.432155 | 2.0510666 | 22.74034 | 0.104572 | 35.84 |
| 600702 | 2015 | -0.75 | 0.04 | 1.432155 | 2.0510666 | 22.04804 | 0.003174 | 29.85 |
| 2466   | 2015 | -0.21 | 0.04 | 1.432155 | 2.0510666 | 22.26975 | 0.104572 | 35.84 |
| 2466   | 2015 | -0.08 | 0.04 | 1.432155 | 2.0510666 | 22.74034 | 0.104572 | 35.84 |
| 810    | 2015 | 0.744 | 0.04 | 1.432155 | 2.0510666 | 22.3851  | 0.175303 | 58.54 |
| 2466   | 2015 | -0.08 | 0.04 | 1.432155 | 2.0510666 | 22.74034 | 0.104572 | 35.84 |
| 600702 | 2015 | -0.75 | 0.04 | 1.432155 | 2.0510666 | 22.04804 | 0.003174 | 29.85 |
| 2466   | 2015 | -0.08 | 0.04 | 1.432155 | 2.0510666 | 22.74034 | 0.104572 | 35.84 |
| 810    | 2015 | 1.057 | 0.04 | 1.432155 | 2.0510666 | 22.3851  | 0.175303 | 58.54 |
| 2466   | 2015 | -0.08 | 0.04 | 1.432155 | 2.0510666 | 22.74034 | 0.104572 | 35.84 |
| 810    | 2015 | 1.057 | 0.04 | 1.432155 | 2.0510666 | 22.3851  | 0.175303 | 58.54 |
| 731    | 2015 | -0.45 | 0.04 | 1.432155 | 2.0510666 | 22.34908 | 0.020137 | 12.18 |
| 600702 | 2015 | -0.91 | 0.04 | 1.432155 | 2.0510666 | 22.04804 | 0.003174 | 29.85 |
| 600702 | 2015 | -0.75 | 0.04 | 1.432155 | 2.0510666 | 22.04804 | 0.003174 | 29.85 |

|        |      |       |      |          |            |          |          |       |
|--------|------|-------|------|----------|------------|----------|----------|-------|
| 731    | 2015 | -0.45 | 0.04 | 1.432155 | 2.0510666  | 22.16463 | 0.020137 | 12.18 |
| 810    | 2015 | 0.744 | 0.04 | 1.432155 | 2.0510666  | 22.3851  | 0.175303 | 58.54 |
| 600702 | 2015 | -0.69 | 0.04 | 1.432155 | 2.0510666  | 21.9837  | 0.003174 | 29.85 |
| 810    | 2015 | 1.057 | 0.04 | 1.432155 | 2.0510666  | 21.97692 | 0.175303 | 58.54 |
| 810    | 2015 | 0.668 | 0.04 | 1.432155 | 2.0510666  | 22.3851  | 0.175303 | 58.54 |
| 731    | 2015 | -0.45 | 0.04 | 1.432155 | 2.0510666  | 22.34908 | 0.020137 | 12.18 |
| 810    | 2015 | 0.061 | 0.04 | 1.432155 | 2.0510666  | 22.3851  | 0.175303 | 58.54 |
| 731    | 2015 | -0.45 | 0.04 | 1.432155 | 2.0510666  | 22.34908 | 0.020137 | 12.18 |
| 600702 | 2015 | -0.69 | 0.04 | 1.432155 | 2.0510666  | 22.04804 | 0.003174 | 29.85 |
| 731    | 2015 | -0.45 | 0.04 | 1.432155 | 2.0510666  | 22.34908 | 0.020137 | 12.18 |
| 937    | 2015 | -0.91 | 0.02 | 0.342644 | 0.11740482 | 24.42969 | 0.015198 | 44.12 |
| 937    | 2015 | -0.91 | 0.02 | 0.342644 | 0.11740482 | 24.42969 | 0.015198 | 44.12 |
| 2442   | 2015 | -0.43 | 0.02 | 0.342644 | 0.11740482 | 21.76366 | -0.07819 | 36.26 |
| 2442   | 2015 | 0.204 | 0.02 | 0.342644 | 0.11740482 | 21.76366 | -0.07819 | 36.26 |
| 2442   | 2015 | -0.22 | 0.02 | 0.342644 | 0.11740482 | 21.76366 | -0.07819 | 36.26 |
| 937    | 2015 | -0.91 | 0.02 | 0.342644 | 0.11740482 | 24.27335 | 0.015198 | 44.12 |
| 2442   | 2015 | -0.43 | 0.02 | 0.342644 | 0.11740482 | 21.76366 | -0.07819 | 36.26 |
| 2442   | 2015 | 0.204 | 0.02 | 0.342644 | 0.11740482 | 21.61174 | -0.07819 | 36.26 |
| 937    | 2015 | -0.91 | 0.02 | 0.342644 | 0.11740482 | 24.42969 | 0.015198 | 44.12 |
| 300138 | 2015 | -0.06 | 0.02 | 1.826769 | 3.3370847  | 21.41204 | 0.047904 | 18.73 |
| 778    | 2015 | -0.43 | 0.02 | 1.826769 | 3.3370847  | 24.65256 | 0.025509 | 45.38 |
| 778    | 2015 | 0.484 | 0.02 | 1.826769 | 3.34E+00   | 24.65256 | 0.025509 | 45.38 |
| 300138 | 2015 | -0.69 | 0.02 | 1.826769 | 3.34E+00   | 21.41204 | 0.047904 | 18.73 |
| 778    | 2015 | -0.67 | 0.02 | 1.826769 | 3.34E+00   | 24.65256 | 0.025509 | 45.38 |
| 300138 | 2015 | -0.69 | 0.02 | 1.826769 | 3.34E+00   | 21.41204 | 0.047904 | 18.73 |
| 300138 | 2015 | -0.31 | 0.02 | 1.826769 | 3.34E+00   | 21.41204 | 0.047904 | 18.73 |
| 778    | 2015 | -0.84 | 0.02 | 1.826769 | 3.34E+00   | 24.65256 | 0.025509 | 45.38 |
| 778    | 2015 | -0.32 | 0.02 | 1.826769 | 3.34E+00   | 24.65256 | 0.025509 | 45.38 |
| 778    | 2015 | -0.42 | 0.02 | 1.826769 | 3.34E+00   | 24.65256 | 0.025509 | 45.38 |
| 778    | 2015 | -0.21 | 0.02 | 1.826769 | 3.34E+00   | 24.65256 | 0.025509 | 45.38 |
| 300138 | 2015 | 0.288 | 0.02 | 1.826769 | 3.3370847  | 21.41204 | 0.047904 | 18.73 |
| 300138 | 2015 | -0.37 | 0.02 | 1.826769 | 3.3370847  | 21.41204 | 0.047904 | 18.73 |
| 778    | 2015 | -0.2  | 0.02 | 1.826769 | 3.3370847  | 24.65256 | 0.025509 | 45.38 |
| 300138 | 2015 | -0.12 | 0.02 | 1.826769 | 3.3370847  | 21.41204 | 0.047904 | 18.73 |
| 778    | 2015 | -0.57 | 0.02 | 1.826769 | 3.3370847  | 24.65256 | 0.025509 | 45.38 |
| 778    | 2015 | -0.18 | 0.02 | 1.826769 | 3.3370847  | 24.65256 | 0.025509 | 45.38 |
| 778    | 2015 | -0.27 | 0.02 | 1.826769 | 3.3370847  | 24.65256 | 0.025509 | 45.38 |
| 778    | 2015 | -0.6  | 0.02 | 1.826769 | 3.3370847  | 24.65256 | 0.025509 | 45.38 |
| 300138 | 2015 | -0    | 0.02 | 1.826769 | 3.3370847  | 21.41204 | 0.047904 | 18.73 |
| 300138 | 2015 | 0.632 | 0.02 | 1.826769 | 3.3370847  | 21.41204 | 0.047904 | 18.73 |
| 300138 | 2015 | -0    | 0.02 | 1.826769 | 3.3370847  | 21.41204 | 0.047904 | 18.73 |
| 300138 | 2015 | -0.37 | 0.02 | 1.826769 | 3.3370847  | 21.41204 | 0.047904 | 18.73 |
| 778    | 2015 | -0.27 | 0.02 | 1.826769 | 3.3370847  | 24.02285 | 0.025509 | 45.38 |
| 778    | 2015 | -0.57 | 0.02 | 1.826769 | 3.3370847  | 24.65256 | 0.025509 | 45.38 |
| 300138 | 2015 | -0.37 | 0.02 | 1.826769 | 3.3370847  | 21.32882 | 0.047904 | 18.73 |
| 778    | 2015 | -0.84 | 0.02 | 1.826769 | 3.3370847  | 24.65256 | 0.025509 | 45.38 |
| 778    | 2015 | -0.27 | 0.02 | 1.826769 | 3.3370847  | 24.65256 | 0.025509 | 45.38 |
| 778    | 2015 | -0.58 | 0.02 | 1.826769 | 3.3370847  | 24.65256 | 0.025509 | 45.38 |
| 2132   | 2015 | -0.59 | 0.07 | 1.100749 | 1.2116491  | 21.75781 | 0.022075 | 34.54 |
| 300007 | 2015 | 0.009 | 0.07 | 1.100749 | 1.2116491  | 21.34186 | 0.066049 | 21.74 |
| 2582   | 2015 | -0.56 | 0.07 | 1.100749 | 1.2116491  | 21.6484  | -0.00234 | 38.25 |
| 2296   | 2015 | 0.524 | 0.07 | 1.100749 | 1.2116491  | 21.48546 | 0.051617 | 14.61 |
| 300248 | 2015 | 0.405 | 0.07 | 1.100749 | 1.2116491  | 21.01991 | 0.073653 | 22.46 |
| 600595 | 2015 | -0.68 | 0.07 | 1.100749 | 1.2116491  | 23.94313 | -0.19627 | 53.29 |

|        |      |       |      |          |           |          |          |       |
|--------|------|-------|------|----------|-----------|----------|----------|-------|
| 300007 | 2015 | -0.4  | 0.07 | 1.100749 | 1.2116491 | 21.75674 | 0.066049 | 21.74 |
| 2296   | 2015 | 0.762 | 0.07 | 1.100749 | 1.2116491 | 21.48546 | 0.051617 | 14.61 |
| 676    | 2015 | 0.236 | 0.07 | 1.100749 | 1.2116491 | 20.10336 | -0.02899 | 20.03 |
| 300179 | 2015 | -0.05 | 0.07 | 1.100749 | 1.2116491 | 20.56748 | 0.057306 | 28.17 |
| 600595 | 2015 | -0.72 | 0.07 | 1.100749 | 1.2116491 | 23.94313 | -0.19627 | 53.29 |
| 300064 | 2015 | -0.36 | 0.07 | 1.100749 | 1.2116491 | 21.94026 | 0.053652 | 36.37 |
| 600222 | 2015 | 0.652 | 0.07 | 1.100749 | 1.2116491 | 21.69388 | 0.002938 | 22.97 |
| 300007 | 2015 | -0.36 | 0.07 | 1.100749 | 1.2116491 | 21.75674 | 0.066049 | 21.74 |
| 600222 | 2015 | 0.652 | 0.07 | 1.100749 | 1.2116491 | 21.69388 | 0.002938 | 22.97 |
| 2216   | 2015 | -0.42 | 0.07 | 1.100749 | 1.2116491 | 21.77621 | 0.018515 | 10.48 |
| 300007 | 2015 | 0.174 | 0.07 | 1.100749 | 1.2116491 | 21.75674 | 0.066049 | 21.74 |
| 601677 | 2015 | -0.66 | 0.07 | 1.100749 | 1.2116491 | 22.44072 | 0.050888 | 21.94 |
| 601717 | 2015 | -0.13 | 0.07 | 1.100749 | 1.2116491 | 23.21272 | 0.001103 | 32.14 |
| 300259 | 2015 | -0.2  | 0.07 | 1.100749 | 1.2116491 | 20.75374 | 0.089602 | 40.75 |
| 300064 | 2015 | -0.36 | 0.07 | 1.100749 | 1.2116491 | 21.94026 | 0.053652 | 36.37 |
| 601717 | 2015 | -0.57 | 0.07 | 1.100749 | 1.2116491 | 23.12657 | 0.001103 | 32.14 |
| 2216   | 2015 | -0.42 | 0.07 | 1.100749 | 1.2116491 | 22.0691  | 0.018515 | 10.48 |
| 2216   | 2015 | -0.42 | 0.07 | 1.100749 | 1.2116491 | 22.0691  | 0.018515 | 10.48 |
| 676    | 2015 | -0.29 | 0.07 | 1.100749 | 1.2116491 | 20.10336 | -0.02899 | 20.03 |
| 2431   | 2015 | 0.077 | 0.07 | 1.100749 | 1.2116491 | 23.22839 | -0.04703 | 14.09 |
| 676    | 2015 | -0.29 | 0.07 | 1.100749 | 1.2116491 | 20.10336 | -0.02899 | 20.03 |
| 600066 | 2015 | -0.4  | 0.07 | 1.100749 | 1.2116491 | 24.12909 | 0.277269 | 37.19 |
| 300259 | 2015 | -0.13 | 0.07 | 1.100749 | 1.2116491 | 20.75374 | 0.089602 | 40.75 |
| 600595 | 2015 | -0.72 | 0.07 | 1.100749 | 1.2116491 | 23.94313 | -0.19627 | 53.29 |
| 2132   | 2015 | -0.54 | 0.07 | 1.100749 | 1.2116491 | 21.75781 | 0.022075 | 34.54 |
| 2296   | 2015 | 0.464 | 0.07 | 1.100749 | 1.2116491 | 21.48546 | 0.051617 | 14.61 |
| 600222 | 2015 | 0.652 | 0.07 | 1.100749 | 1.2116491 | 21.69388 | 0.002938 | 22.97 |
| 600222 | 2015 | 0.652 | 0.07 | 1.100749 | 1.2116491 | 21.69388 | 0.002938 | 22.97 |
| 300007 | 2015 | 0.084 | 0.07 | 1.100749 | 1.2116491 | 21.75674 | 0.066049 | 21.74 |
| 601677 | 2015 | -0.66 | 0.07 | 1.100749 | 1.2116491 | 22.44072 | 0.050888 | 21.94 |
| 601717 | 2015 | -0.35 | 0.07 | 1.100749 | 1.2116491 | 23.21272 | 0.001103 | 32.14 |
| 300248 | 2015 | 0.405 | 0.07 | 1.100749 | 1.2116491 | 21.01991 | 0.073653 | 22.46 |
| 676    | 2015 | -0.29 | 0.07 | 1.100749 | 1.2116491 | 20.10336 | -0.02899 | 20.03 |
| 300259 | 2015 | -0.24 | 0.07 | 1.100749 | 1.2116491 | 20.75374 | 0.089602 | 40.75 |
| 300259 | 2015 | -0.13 | 0.07 | 1.100749 | 1.2116491 | 20.75374 | 0.089602 | 40.75 |
| 300064 | 2015 | 0.041 | 0.07 | 1.100749 | 1.2116491 | 21.94026 | 0.053652 | 36.37 |
| 601677 | 2015 | -0.66 | 0.07 | 1.100749 | 1.2116491 | 22.44072 | 0.050888 | 21.94 |
| 601677 | 2015 | -0.66 | 0.07 | 1.100749 | 1.2116491 | 22.44072 | 0.050888 | 21.94 |
| 600595 | 2015 | -0.76 | 0.07 | 1.100749 | 1.2116491 | 23.66721 | -0.19627 | 53.29 |
| 300007 | 2015 | -0.32 | 0.07 | 1.100749 | 1.2116491 | 21.75674 | 0.066049 | 21.74 |
| 2296   | 2015 | 0.464 | 0.07 | 1.100749 | 1.2116491 | 21.48546 | 0.051617 | 14.61 |
| 600222 | 2015 | 0.652 | 0.07 | 1.100749 | 1.2116491 | 21.56484 | 0.002938 | 22.97 |
| 601717 | 2015 | -0.1  | 0.07 | 1.100749 | 1.2116491 | 23.21272 | 0.001103 | 32.14 |
| 600066 | 2015 | -0.4  | 0.07 | 1.100749 | 1.2116491 | 24.12909 | 0.277269 | 37.19 |
| 600222 | 2015 | 0.652 | 0.07 | 1.100749 | 1.2116491 | 21.69388 | 0.002938 | 22.97 |
| 300007 | 2015 | 0.236 | 0.07 | 1.100749 | 1.2116491 | 21.75674 | 0.066049 | 21.74 |
| 600222 | 2015 | 0.652 | 0.07 | 1.100749 | 1.2116491 | 21.69388 | 0.002938 | 22.97 |
| 2132   | 2015 | -0.67 | 0.07 | 1.100749 | 1.2116491 | 21.53683 | 0.022075 | 34.54 |
| 601717 | 2015 | -0.57 | 0.07 | 1.100749 | 1.2116491 | 23.21272 | 0.001103 | 32.14 |
| 600595 | 2015 | -0.68 | 0.07 | 1.100749 | 1.2116491 | 23.94313 | -0.19627 | 53.29 |
| 676    | 2015 | -0.29 | 0.07 | 1.100749 | 1.2116491 | 20.10336 | -0.02899 | 20.03 |
| 300064 | 2015 | -0.36 | 0.07 | 1.100749 | 1.2116491 | 21.94026 | 0.053652 | 36.37 |
| 2431   | 2015 | -0.09 | 0.07 | 1.100749 | 1.2116491 | 23.22839 | -0.04703 | 14.09 |
| 2296   | 2015 | 0.481 | 0.07 | 1.100749 | 1.2116491 | 21.48546 | 0.051617 | 14.61 |

|        |      |       |      |          |            |          |          |       |
|--------|------|-------|------|----------|------------|----------|----------|-------|
| 2296   | 2015 | 0.549 | 0.07 | 1.100749 | 1.2116491  | 21.48546 | 0.051617 | 14.61 |
| 300064 | 2015 | 0.315 | 0.07 | 1.100749 | 1.2116491  | 21.83274 | 0.053652 | 36.37 |
| 300179 | 2015 | -0.1  | 0.07 | 1.100749 | 1.2116491  | 20.56748 | 0.057306 | 28.17 |
| 601677 | 2015 | -0.66 | 0.07 | 1.100749 | 1.2116491  | 22.19514 | 0.050888 | 21.94 |
| 2431   | 2015 | 0.077 | 0.07 | 1.100749 | 1.2116491  | 23.14948 | -0.04703 | 14.09 |
| 300179 | 2015 | -0.26 | 0.07 | 1.100749 | 1.2116491  | 20.56748 | 0.057306 | 28.17 |
| 300064 | 2015 | 0.1   | 0.07 | 1.100749 | 1.2116491  | 21.94026 | 0.053652 | 36.37 |
| 2296   | 2015 | 0.544 | 0.07 | 1.100749 | 1.2116491  | 21.48546 | 0.051617 | 14.61 |
| 2431   | 2015 | -0.08 | 0.07 | 1.100749 | 1.2116491  | 23.22839 | -0.04703 | 14.09 |
| 600066 | 2015 | -0.16 | 0.07 | 1.100749 | 1.2116491  | 24.12909 | 0.277269 | 37.19 |
| 2582   | 2015 | -0.56 | 0.07 | 1.100749 | 1.2116491  | 21.58947 | -0.00234 | 38.25 |
| 2431   | 2015 | 0.077 | 0.07 | 1.100749 | 1.2116491  | 23.22839 | -0.04703 | 14.09 |
| 300179 | 2015 | -0.26 | 0.07 | 1.100749 | 1.2116491  | 20.56748 | 0.057306 | 28.17 |
| 600595 | 2015 | -0.8  | 0.07 | 1.100749 | 1.2116491  | 23.94313 | -0.19627 | 53.29 |
| 300007 | 2015 | 0.236 | 0.07 | 1.100749 | 1.2116491  | 21.75674 | 0.066049 | 21.74 |
| 300007 | 2015 | 0.146 | 0.07 | 1.100749 | 1.2116491  | 21.75674 | 0.066049 | 21.74 |
| 300259 | 2015 | -0.24 | 0.07 | 1.100749 | 1.2116491  | 20.75374 | 0.089602 | 40.75 |
| 2216   | 2015 | -0.42 | 0.07 | 1.100749 | 1.2116491  | 22.0691  | 0.018515 | 10.48 |
| 300007 | 2015 | -0.04 | 0.07 | 1.100749 | 1.2116491  | 21.75674 | 0.066049 | 21.74 |
| 2132   | 2015 | -0.59 | 0.07 | 1.100749 | 1.2116491  | 21.75781 | 0.022075 | 34.54 |
| 300259 | 2015 | -0.13 | 0.07 | 1.100749 | 1.2116491  | 20.75374 | 0.089602 | 40.75 |
| 300248 | 2015 | 0.405 | 0.07 | 1.100749 | 1.2116491  | 20.91246 | 0.073653 | 22.46 |
| 300179 | 2015 | -0.05 | 0.07 | 1.100749 | 1.2116491  | 20.57934 | 0.057306 | 28.17 |
| 300007 | 2015 | 0.174 | 0.07 | 1.100749 | 1.2116491  | 21.75674 | 0.066049 | 21.74 |
| 300248 | 2015 | 0.405 | 0.07 | 1.100749 | 1.2116491  | 21.01991 | 0.073653 | 22.46 |
| 600066 | 2015 | -0.16 | 0.07 | 1.100749 | 1.2116491  | 24.02058 | 0.277269 | 37.19 |
| 300064 | 2015 | -0.5  | 0.07 | 1.100749 | 1.2116491  | 21.94026 | 0.053652 | 36.37 |
| 601717 | 2015 | -0.57 | 0.07 | 1.100749 | 1.2116491  | 23.21272 | 0.001103 | 32.14 |
| 601717 | 2015 | -0.39 | 0.07 | 1.100749 | 1.2116491  | 23.21272 | 0.001103 | 32.14 |
| 300259 | 2015 | -0.24 | 0.07 | 1.100749 | 1.2116491  | 20.75374 | 0.089602 | 40.75 |
| 676    | 2015 | 8E-04 | 0.07 | 1.100749 | 1.2116491  | 20.10336 | -0.02899 | 20.03 |
| 601717 | 2015 | -0.57 | 0.07 | 1.100749 | 1.2116491  | 23.21272 | 0.001103 | 32.14 |
| 601717 | 2015 | -0.1  | 0.07 | 1.100749 | 1.2116491  | 23.21272 | 0.001103 | 32.14 |
| 2296   | 2015 | 0.464 | 0.07 | 1.100749 | 1.2116491  | 21.44657 | 0.051617 | 14.61 |
| 600066 | 2015 | -0.4  | 0.07 | 1.100749 | 1.2116491  | 24.12909 | 0.277269 | 37.19 |
| 300007 | 2015 | 0.165 | 0.07 | 1.100749 | 1.2116491  | 21.75674 | 0.066049 | 21.74 |
| 2132   | 2015 | -0.54 | 0.07 | 1.100749 | 1.2116491  | 21.75781 | 0.022075 | 34.54 |
| 2296   | 2015 | 0.762 | 0.07 | 1.100749 | 1.2116491  | 21.48546 | 0.051617 | 14.61 |
| 2431   | 2015 | -0.14 | 0.07 | 1.100749 | 1.2116491  | 23.14948 | -0.04703 | 14.09 |
| 2431   | 2015 | 0.077 | 0.07 | 1.100749 | 1.2116491  | 23.22839 | -0.04703 | 14.09 |
| 300259 | 2015 | -0.24 | 0.07 | 1.100749 | 1.2116491  | 20.73685 | 0.089602 | 40.75 |
| 676    | 2015 | 8E-04 | 0.07 | 1.100749 | 1.2116491  | 20.10336 | -0.02899 | 20.03 |
| 2582   | 2015 | -0.56 | 0.07 | 1.100749 | 1.2116491  | 21.58947 | -0.00234 | 38.25 |
| 600595 | 2015 | -0.8  | 0.07 | 1.100749 | 1.2116491  | 23.94313 | -0.19627 | 53.29 |
| 300064 | 2015 | -0.13 | 0.07 | 1.100749 | 1.2116491  | 21.94026 | 0.053652 | 36.37 |
| 2132   | 2015 | -0.67 | 0.07 | 1.100749 | 1.2116491  | 21.75781 | 0.022075 | 34.54 |
| 601717 | 2015 | -0.57 | 0.07 | 1.100749 | 1.2116491  | 23.21272 | 0.001103 | 32.14 |
| 600066 | 2015 | -0.08 | 0.07 | 1.100749 | 1.2116491  | 24.12909 | 0.277269 | 37.19 |
| 300064 | 2015 | -0.13 | 0.07 | 1.100749 | 1.2116491  | 21.94026 | 0.053652 | 36.37 |
| 600222 | 2015 | 0.652 | 0.07 | 1.100749 | 1.2116491  | 21.69388 | 0.002938 | 22.97 |
| 2716   | 2015 | 0.281 | 1.03 | 0.10924  | 0.01193337 | 22.54524 | 0.059899 | 33.73 |
| 2716   | 2015 | 0.281 | 1.03 | 0.10924  | 0.01193337 | 22.54524 | 0.059899 | 33.73 |
| 2716   | 2015 | 0.281 | 1.03 | 0.10924  | 0.01193337 | 22.55055 | 0.059899 | 33.73 |
| 683    | 2015 | -0.75 | 0.01 | 0.918865 | 0.84431365 | 23.6876  | 0.012673 | 36.74 |

|        |      |       |      |          |            |          |          |       |
|--------|------|-------|------|----------|------------|----------|----------|-------|
| 683    | 2015 | -0.75 | 0.01 | 0.918865 | 0.84431365 | 23.6876  | 0.012673 | 36.74 |
| 600295 | 2015 | -0.89 | 0.01 | 0.918865 | 0.84431365 | 24.51836 | 0.036318 | 40.7  |
| 600277 | 2015 | -0.54 | 0.01 | 0.918865 | 0.84431365 | 23.75461 | 0.014981 | 59.32 |
| 683    | 2015 | -0.75 | 0.01 | 0.918865 | 0.84431365 | 23.6876  | 0.012673 | 36.74 |
| 600277 | 2015 | -0.54 | 0.01 | 0.918865 | 0.84431365 | 23.75461 | 0.014981 | 59.32 |
| 600277 | 2015 | -0.11 | 0.01 | 0.918865 | 0.84431365 | 23.75461 | 0.014981 | 59.32 |
| 600277 | 2015 | 0.004 | 0.01 | 0.918865 | 0.84431365 | 23.40255 | 0.014981 | 59.32 |
| 600277 | 2015 | -0.54 | 0.01 | 0.918865 | 0.84431365 | 23.75461 | 0.014981 | 59.32 |
| 600277 | 2015 | 0.342 | 0.01 | 0.918865 | 0.84431365 | 23.75461 | 0.014981 | 59.32 |
| 600295 | 2015 | -0.89 | 0.01 | 0.918865 | 0.84431365 | 23.41665 | 0.036318 | 40.7  |
| 683    | 2015 | -0.75 | 0.01 | 0.918865 | 0.84431365 | 23.6876  | 0.012673 | 36.74 |
| 600295 | 2015 | -0.89 | 0.01 | 0.918865 | 0.84431365 | 24.51836 | 0.036318 | 40.7  |
| 600277 | 2015 | -0.11 | 0.01 | 0.918865 | 0.84431365 | 23.75461 | 0.014981 | 59.32 |
| 683    | 2015 | -0.75 | 0.01 | 0.918865 | 0.84431365 | 23.6876  | 0.012673 | 36.74 |
| 683    | 2015 | -0.75 | 0.01 | 0.918865 | 0.84431365 | 22.79085 | 0.012673 | 36.74 |
| 600295 | 2015 | -0.89 | 0.01 | 0.918865 | 0.84431365 | 24.51836 | 0.036318 | 40.7  |
| 683    | 2015 | -0.75 | 0.01 | 0.918865 | 0.84431365 | 23.6876  | 0.012673 | 36.74 |
| 600295 | 2015 | -0.89 | 0.01 | 0.918865 | 0.84431365 | 24.51836 | 0.036318 | 40.7  |
| 2694   | 2015 | -0.58 | 0.12 | 1.150229 | 1.3230273  | 21.53098 | 0.019526 | 41.13 |
| 2694   | 2015 | 0.505 | 0.12 | 1.150229 | 1.3230273  | 21.53098 | 0.019526 | 41.13 |
| 2694   | 2015 | -0.6  | 0.12 | 1.150229 | 1.3230273  | 21.53098 | 0.019526 | 41.13 |
| 2694   | 2015 | 0.162 | 0.12 | 1.150229 | 1.3230273  | 21.53098 | 0.019526 | 41.13 |
| 2694   | 2015 | -0.75 | 0.12 | 1.150229 | 1.3230273  | 21.22869 | 0.019526 | 41.13 |
| 2694   | 2015 | 0.505 | 0.12 | 1.150229 | 1.3230273  | 21.53098 | 0.019526 | 41.13 |
| 2694   | 2015 | -0.82 | 0.12 | 1.150229 | 1.3230273  | 21.53098 | 0.019526 | 41.13 |
| 2694   | 2015 | -0.6  | 0.12 | 1.150229 | 1.3230273  | 21.53098 | 0.019526 | 41.13 |
| 2694   | 2015 | -0.57 | 0.12 | 1.150229 | 1.3230273  | 21.53098 | 0.019526 | 41.13 |
| 300021 | 2015 | -0.23 | 0.04 | 0.024382 | 0.0005945  | 21.25101 | 0.113175 | 52.08 |
| 600354 | 2015 | -0.27 | 0.04 | 0.024382 | 0.0005945  | 21.54689 | 0.032819 | 12.92 |
| 600354 | 2015 | -0.91 | 0.04 | 0.024382 | 0.0005945  | 21.98382 | 0.032819 | 12.92 |
| 300021 | 2015 | -0.23 | 0.04 | 0.024382 | 0.0005945  | 21.25101 | 0.113175 | 52.08 |
| 300021 | 2015 | -0.23 | 0.04 | 0.024382 | 0.0005945  | 21.25101 | 0.113175 | 52.08 |
| 600354 | 2015 | -0.27 | 0.04 | 0.024382 | 0.0005945  | 21.98382 | 0.032819 | 12.92 |
| 300021 | 2015 | -0.23 | 0.04 | 0.024382 | 0.0005945  | 21.25101 | 0.113175 | 52.08 |
| 300021 | 2015 | -0.23 | 0.04 | 0.024382 | 0.0005945  | 21.25101 | 0.113175 | 52.08 |
| 300021 | 2015 | -0.23 | 0.04 | 0.024382 | 0.0005945  | 21.09492 | 0.113175 | 52.08 |
| 300021 | 2015 | -0.23 | 0.04 | 0.024382 | 0.0005945  | 21.25101 | 0.113175 | 52.08 |
| 300021 | 2015 | -0.23 | 0.04 | 0.024382 | 0.0005945  | 21.25101 | 0.113175 | 52.08 |
| 600354 | 2015 | -0.93 | 0.04 | 0.024382 | 0.0005945  | 21.25101 | 0.113175 | 52.08 |
| 600354 | 2015 | -0.91 | 0.04 | 0.024382 | 0.0005945  | 21.98382 | 0.032819 | 12.92 |
| 600354 | 2015 | -0.75 | 0.04 | 0.024382 | 0.0005945  | 21.98382 | 0.032819 | 12.92 |
| 600354 | 2015 | -0.27 | 0.04 | 0.024382 | 0.0005945  | 21.98382 | 0.032819 | 12.92 |
| 300021 | 2015 | -0.23 | 0.04 | 0.024382 | 0.0005945  | 21.25101 | 0.113175 | 52.08 |
| 600354 | 2015 | -0.27 | 0.04 | 0.024382 | 0.0005945  | 21.98382 | 0.032819 | 12.92 |
| 300021 | 2015 | -0.13 | 0.04 | 0.024382 | 0.0005945  | 21.25101 | 0.113175 | 52.08 |
| 300021 | 2015 | -0.23 | 0.04 | 0.024382 | 0.0005945  | 21.25101 | 0.113175 | 52.08 |
| 600354 | 2015 | -0.27 | 0.04 | 0.024382 | 0.0005945  | 21.98382 | 0.032819 | 12.92 |
| 300069 | 2015 | -0.53 | 0.12 | 0.348307 | 0.12131772 | 20.27704 | 0.021566 | 36.55 |
| 600668 | 2015 | 0.135 | 0.12 | 0.348307 | 0.12131772 | 22.01291 | 0.095997 | 16.15 |
| 300234 | 2015 | -0.19 | 0.12 | 0.348307 | 0.12131772 | 20.52187 | 0.111096 | 37.95 |
| 980    | 2015 | 0.031 | 0.12 | 0.348307 | 0.12131772 | 21.79378 | 0.029013 | 19.99 |
| 300401 | 2015 | 0.309 | 0.12 | 0.348307 | 0.12131772 | 20.4848  | 0.016958 | 38.41 |
| 300234 | 2015 | -0.04 | 0.12 | 0.348307 | 0.12131772 | 20.59091 | 0.111096 | 37.95 |
| 601113 | 2015 | -0.02 | 0.12 | 0.348307 | 0.12131772 | 22.17161 | 0.036804 | 40.52 |



|        |      |       |      |          |            |          |          |       |
|--------|------|-------|------|----------|------------|----------|----------|-------|
| 2632   | 2015 | -0.52 | 0.12 | 0.348307 | 0.12131772 | 21.17089 | 0.031768 | 42.18 |
| 600668 | 2015 | -0.48 | 0.12 | 0.348307 | 0.12131772 | 22.01291 | 0.095997 | 16.15 |
| 600572 | 2015 | 0.578 | 0.12 | 0.348307 | 0.12131772 | 22.98177 | 0.110334 | 27.4  |
| 739    | 2015 | -0.02 | 0.12 | 0.348307 | 0.12131772 | 22.40873 | 0.08616  | 23.52 |
| 739    | 2015 | -0.34 | 0.12 | 0.348307 | 0.12131772 | 22.40873 | 0.08616  | 23.52 |
| 2703   | 2015 | 0.768 | 0.12 | 0.348307 | 0.12131772 | 21.35762 | 0.035513 | 52.36 |
| 2434   | 2015 | -0.27 | 0.12 | 0.348307 | 0.12131772 | 22.0918  | 0.087591 | 33.27 |
| 300027 | 2015 | -0.14 | 0.12 | 0.348307 | 0.12131772 | 23.60773 | 0.113533 | 20.78 |
| 300069 | 2015 | -0.53 | 0.12 | 0.348307 | 0.12131772 | 20.35474 | 0.021566 | 36.55 |
| 300027 | 2015 | 0.526 | 0.12 | 0.348307 | 0.12131772 | 23.60773 | 0.113533 | 20.78 |
| 600572 | 2015 | 0.578 | 0.12 | 0.348307 | 0.12131772 | 22.98177 | 0.110334 | 27.4  |
| 600572 | 2015 | -0.05 | 0.12 | 0.348307 | 0.12131772 | 22.98177 | 0.110334 | 27.4  |
| 980    | 2015 | 0.031 | 0.12 | 0.348307 | 0.12131772 | 21.94961 | 0.029013 | 19.99 |
| 739    | 2015 | 0.663 | 0.12 | 0.348307 | 0.12131772 | 22.40873 | 0.08616  | 23.52 |
| 600668 | 2015 | 0.182 | 0.12 | 0.348307 | 0.12131772 | 21.58233 | 0.095997 | 16.15 |
| 2615   | 2015 | -0.56 | 0.12 | 0.348307 | 0.12131772 | 20.54662 | 0.057793 | 49.5  |
| 600668 | 2015 | -0.48 | 0.12 | 0.348307 | 0.12131772 | 22.01291 | 0.095997 | 16.15 |
| 300234 | 2015 | -0.19 | 0.12 | 0.348307 | 0.12131772 | 20.59091 | 0.111096 | 37.95 |
| 2703   | 2015 | -0.29 | 0.12 | 0.348307 | 0.12131772 | 21.35762 | 0.035513 | 52.36 |
| 300069 | 2015 | -0.53 | 0.12 | 0.348307 | 0.12131772 | 20.35474 | 0.021566 | 36.55 |
| 739    | 2015 | 0.663 | 0.12 | 0.348307 | 0.12131772 | 22.40873 | 0.08616  | 23.52 |
| 739    | 2015 | 0.663 | 0.12 | 0.348307 | 0.12131772 | 21.38405 | 0.08616  | 23.52 |
| 739    | 2015 | -0.66 | 0.12 | 0.348307 | 0.12131772 | 22.40873 | 0.08616  | 23.52 |
| 2615   | 2015 | -0.56 | 0.12 | 0.348307 | 0.12131772 | 20.60616 | 0.057793 | 49.5  |
| 601113 | 2015 | -0.02 | 0.12 | 0.348307 | 0.12131772 | 22.17161 | 0.036804 | 40.52 |
| 600572 | 2015 | -0.19 | 0.12 | 0.348307 | 0.12131772 | 22.98177 | 0.110334 | 27.4  |
| 739    | 2015 | 0.663 | 0.12 | 0.348307 | 0.12131772 | 22.40873 | 0.08616  | 23.52 |
| 739    | 2015 | -0.19 | 0.12 | 0.348307 | 0.12131772 | 22.40873 | 0.08616  | 23.52 |
| 2434   | 2015 | 0.375 | 0.12 | 0.348307 | 0.12131772 | 22.0918  | 0.087591 | 33.27 |
| 2632   | 2015 | -0.52 | 0.12 | 0.348307 | 0.12131772 | 21.17089 | 0.031768 | 42.18 |
| 2632   | 2015 | -0.52 | 0.12 | 0.348307 | 0.12131772 | 21.0991  | 0.031768 | 42.18 |
| 2619   | 2015 | -0.48 | 0.12 | 0.348307 | 0.12131772 | 21.96395 | 0.049601 | 15.46 |
| 2056   | 2015 | -0.62 | 0.12 | 0.348307 | 0.12131772 | 22.36023 | 0.091222 | 50.15 |
| 739    | 2015 | 0.663 | 0.12 | 0.348307 | 0.12131772 | 22.40873 | 0.08616  | 23.52 |
| 2434   | 2015 | -0.61 | 0.12 | 0.348307 | 0.12131772 | 22.0918  | 0.087591 | 33.27 |
| 2434   | 2015 | -0.31 | 0.12 | 0.348307 | 0.12131772 | 22.0918  | 0.087591 | 33.27 |
| 980    | 2015 | -0.5  | 0.12 | 0.348307 | 0.12131772 | 21.79378 | 0.029013 | 19.99 |
| 600572 | 2015 | 0.578 | 0.12 | 0.348307 | 0.12131772 | 22.98177 | 0.110334 | 27.4  |
| 2199   | 2015 | -0.46 | 0.12 | 0.348307 | 0.12131772 | 21.04829 | -0.4336  | 14.8  |
| 2632   | 2015 | -0.52 | 0.12 | 0.348307 | 0.12131772 | 21.17089 | 0.031768 | 42.18 |
| 2632   | 2015 | -0.17 | 0.12 | 0.348307 | 0.12131772 | 21.17089 | 0.031768 | 42.18 |
| 2199   | 2015 | -0.34 | 0.12 | 0.348307 | 0.12131772 | 21.04829 | -0.4336  | 14.8  |
| 2632   | 2015 | -0.46 | 0.12 | 0.348307 | 0.12131772 | 21.17089 | 0.031768 | 42.18 |
| 980    | 2015 | 0.031 | 0.12 | 0.348307 | 0.12131772 | 21.79378 | 0.029013 | 19.99 |
| 2199   | 2015 | -0.26 | 0.12 | 0.348307 | 0.12131772 | 21.04829 | -0.4336  | 14.8  |
| 2434   | 2015 | -0.23 | 0.12 | 0.348307 | 0.12131772 | 22.0918  | 0.087591 | 33.27 |
| 300234 | 2015 | 0.209 | 0.12 | 0.348307 | 0.12131772 | 20.59091 | 0.111096 | 37.95 |
| 2199   | 2015 | -0.34 | 0.12 | 0.348307 | 0.12131772 | 21.04829 | -0.4336  | 14.8  |
| 600668 | 2015 | 0.585 | 0.12 | 0.348307 | 0.12131772 | 22.01291 | 0.095997 | 16.15 |
| 600572 | 2015 | 0.578 | 0.12 | 0.348307 | 0.12131772 | 22.98177 | 0.110334 | 27.4  |
| 2703   | 2015 | 0.768 | 0.12 | 0.348307 | 0.12131772 | 20.81578 | 0.035513 | 52.36 |
| 2434   | 2015 | -0.3  | 0.12 | 0.348307 | 0.12131772 | 22.0918  | 0.087591 | 33.27 |
| 300401 | 2015 | 0.309 | 0.12 | 0.348307 | 0.12131772 | 20.40456 | 0.016958 | 38.41 |
| 739    | 2015 | -0.02 | 0.12 | 0.348307 | 0.12131772 | 22.40873 | 0.08616  | 23.52 |

|        |      |       |      |          |            |          |          |       |
|--------|------|-------|------|----------|------------|----------|----------|-------|
| 600572 | 2015 | -0.2  | 0.12 | 0.348307 | 0.12131772 | 22.98177 | 0.110334 | 27.4  |
| 739    | 2015 | 0.663 | 0.12 | 0.348307 | 0.12131772 | 22.40873 | 0.08616  | 23.52 |
| 2434   | 2015 | -0.23 | 0.12 | 0.348307 | 0.12131772 | 22.52863 | 0.087591 | 33.27 |
| 600668 | 2015 | -0.48 | 0.12 | 0.348307 | 0.12131772 | 22.01291 | 0.095997 | 16.15 |
| 2056   | 2015 | -0.25 | 0.12 | 0.348307 | 0.12131772 | 22.36023 | 0.091222 | 50.15 |
| 739    | 2015 | 0.663 | 0.12 | 0.348307 | 0.12131772 | 22.40873 | 0.08616  | 23.52 |
| 2703   | 2015 | 0.106 | 0.12 | 0.348307 | 0.12131772 | 21.35762 | 0.035513 | 52.36 |
| 300401 | 2015 | 0.309 | 0.12 | 0.348307 | 0.12131772 | 20.4848  | 0.016958 | 38.41 |
| 2619   | 2015 | 0.163 | 0.12 | 0.348307 | 0.12131772 | 22.02625 | 0.049601 | 15.46 |
| 2619   | 2015 | -0.48 | 0.12 | 0.348307 | 0.12131772 | 22.02625 | 0.049601 | 15.46 |
| 2199   | 2015 | -0.31 | 0.12 | 0.348307 | 0.12131772 | 21.04829 | -0.4336  | 14.8  |
| 2619   | 2015 | -0.16 | 0.12 | 0.348307 | 0.12131772 | 22.02625 | 0.049601 | 15.46 |
| 2615   | 2015 | -0.57 | 0.12 | 0.348307 | 0.12131772 | 20.60616 | 0.057793 | 49.5  |
| 600668 | 2015 | -0.48 | 0.12 | 0.348307 | 0.12131772 | 22.01291 | 0.095997 | 16.15 |
| 2056   | 2015 | -0.28 | 0.12 | 0.348307 | 0.12131772 | 22.34678 | 0.091222 | 50.15 |
| 600668 | 2015 | -0.48 | 0.12 | 0.348307 | 0.12131772 | 22.01291 | 0.095997 | 16.15 |
| 2632   | 2015 | -0.52 | 0.12 | 0.348307 | 0.12131772 | 21.17089 | 0.031768 | 42.18 |
| 2632   | 2015 | -0.52 | 0.12 | 0.348307 | 0.12131772 | 21.17089 | 0.031768 | 42.18 |
| 300027 | 2015 | 0.19  | 0.12 | 0.348307 | 0.12131772 | 23.37177 | 0.113533 | 20.78 |
| 2199   | 2015 | -0.46 | 0.12 | 0.348307 | 0.12131772 | 21.04829 | -0.4336  | 14.8  |
| 2619   | 2015 | 0.163 | 0.12 | 0.348307 | 0.12131772 | 22.02625 | 0.049601 | 15.46 |
| 739    | 2015 | -0.02 | 0.12 | 0.348307 | 0.12131772 | 22.40873 | 0.08616  | 23.52 |
| 600572 | 2015 | -0.11 | 0.12 | 0.348307 | 0.12131772 | 22.98177 | 0.110334 | 27.4  |
| 300027 | 2015 | 0.19  | 0.12 | 0.348307 | 0.12131772 | 23.60773 | 0.113533 | 20.78 |
| 600572 | 2015 | -0.3  | 0.12 | 0.348307 | 0.12131772 | 22.98177 | 0.110334 | 27.4  |
| 980    | 2015 | -0.5  | 0.12 | 0.348307 | 0.12131772 | 21.79378 | 0.029013 | 19.99 |
| 300401 | 2015 | 0.309 | 0.12 | 0.348307 | 0.12131772 | 20.4848  | 0.016958 | 38.41 |
| 600572 | 2015 | -0.26 | 0.12 | 0.348307 | 0.12131772 | 22.98177 | 0.110334 | 27.4  |
| 600572 | 2015 | -0.75 | 0.12 | 0.348307 | 0.12131772 | 22.98177 | 0.110334 | 27.4  |
| 2615   | 2015 | -0.57 | 0.12 | 0.348307 | 1.21E-01   | 20.60616 | 0.057793 | 49.5  |
| 300069 | 2015 | -0.53 | 0.12 | 0.348307 | 1.21E-01   | 20.35474 | 0.021566 | 36.55 |
| 600572 | 2015 | -0.2  | 0.12 | 0.348307 | 1.21E-01   | 22.98177 | 0.110334 | 27.4  |
| 600668 | 2015 | -0.1  | 0.12 | 0.348307 | 1.21E-01   | 22.01291 | 0.095997 | 16.15 |
| 300234 | 2015 | 0.209 | 0.12 | 0.348307 | 1.21E-01   | 20.59091 | 0.111096 | 37.95 |
| 600668 | 2015 | -0.74 | 0.12 | 0.348307 | 0.12131772 | 22.01291 | 0.095997 | 16.15 |
| 600572 | 2015 | -0.2  | 0.12 | 0.348307 | 0.12131772 | 22.98177 | 0.110334 | 27.4  |
| 2434   | 2015 | -0.61 | 0.12 | 0.348307 | 0.12131772 | 22.0918  | 0.087591 | 33.27 |
| 600572 | 2015 | -0.75 | 0.12 | 0.348307 | 0.12131772 | 22.98177 | 0.110334 | 27.4  |
| 2056   | 2015 | -0.62 | 0.12 | 0.348307 | 0.12131772 | 22.36023 | 0.091222 | 50.15 |
| 600572 | 2015 | -0.3  | 0.12 | 0.348307 | 0.12131772 | 22.98177 | 0.110334 | 27.4  |
| 600572 | 2015 | -0.2  | 0.12 | 0.348307 | 0.12131772 | 22.7651  | 0.110334 | 27.4  |
| 2199   | 2015 | 0.061 | 0.12 | 0.348307 | 0.12131772 | 20.64657 | -0.4336  | 14.8  |
| 980    | 2015 | -0.61 | 0.12 | 0.348307 | 0.12131772 | 21.79378 | 0.029013 | 19.99 |
| 2632   | 2015 | -0.61 | 0.12 | 0.348307 | 0.12131772 | 21.17089 | 0.031768 | 42.18 |
| 600572 | 2015 | -0.1  | 0.12 | 0.348307 | 0.12131772 | 22.98177 | 0.110334 | 27.4  |
| 2615   | 2015 | -0.56 | 0.12 | 0.348307 | 0.12131772 | 20.60616 | 0.057793 | 49.5  |
| 2434   | 2015 | -0.61 | 0.12 | 0.348307 | 0.12131772 | 22.0918  | 0.087591 | 33.27 |
| 600668 | 2015 | 0.018 | 0.12 | 0.348307 | 0.12131772 | 22.01291 | 0.095997 | 16.15 |
| 2632   | 2015 | -0.46 | 0.12 | 0.348307 | 0.12131772 | 21.17089 | 0.031768 | 42.18 |
| 601113 | 2015 | -0.02 | 0.12 | 0.348307 | 0.12131772 | 22.1091  | 0.036804 | 40.52 |
| 2703   | 2015 | 0.768 | 0.12 | 0.348307 | 0.12131772 | 21.35762 | 0.035513 | 52.36 |
| 2703   | 2015 | 0.768 | 0.12 | 0.348307 | 0.12131772 | 21.35762 | 0.035513 | 52.36 |
| 600572 | 2015 | 0.137 | 0.12 | 0.348307 | 0.12131772 | 22.98177 | 0.110334 | 27.4  |
| 300401 | 2015 | 0.309 | 0.12 | 0.348307 | 0.12131772 | 20.4848  | 0.016958 | 38.41 |

|        |      |       |      |          |            |          |          |       |
|--------|------|-------|------|----------|------------|----------|----------|-------|
| 739    | 2015 | -0.18 | 0.12 | 0.348307 | 0.12131772 | 22.40873 | 0.08616  | 23.52 |
| 600572 | 2015 | -0.3  | 0.12 | 0.348307 | 0.12131772 | 22.98177 | 0.110334 | 27.4  |
| 739    | 2015 | 0.663 | 0.12 | 0.348307 | 0.12131772 | 22.40873 | 0.08616  | 23.52 |
| 300069 | 2015 | -0.53 | 0.12 | 0.348307 | 0.12131772 | 20.35474 | 0.021566 | 36.55 |
| 2056   | 2015 | -0.25 | 0.12 | 0.348307 | 0.12131772 | 22.36023 | 0.091222 | 50.15 |
| 2703   | 2015 | 0.106 | 0.12 | 0.348307 | 0.12131772 | 21.35762 | 0.035513 | 52.36 |
| 600470 | 2015 | -0.25 | 0.09 | 1.872506 | 3.5062785  | 22.19623 | 0.017979 | 25.49 |
| 600577 | 2015 | -0.67 | 0.09 | 1.872506 | 3.5062785  | 22.21906 | 0.046856 | 21.8  |
| 2136   | 2015 | -0.33 | 0.09 | 1.872506 | 3.5062785  | 20.67289 | -0.28679 | 30.91 |
| 600577 | 2015 | -0.54 | 0.09 | 1.872506 | 3.5062785  | 22.21906 | 0.046856 | 21.8  |
| 600470 | 2015 | -0.07 | 0.09 | 1.872506 | 3.5062785  | 22.54499 | 0.017979 | 25.49 |
| 600577 | 2015 | -0.54 | 0.09 | 1.872506 | 3.5062785  | 22.21906 | 0.046856 | 21.8  |
| 600577 | 2015 | -0.54 | 0.09 | 1.872506 | 3.5062785  | 22.21906 | 0.046856 | 21.8  |
| 600237 | 2015 | -0.45 | 0.09 | 1.872506 | 3.5062785  | 21.63372 | 0.006315 | 16.76 |
| 630    | 2015 | -0.29 | 0.09 | 1.872506 | 3.5062785  | 24.18378 | -0.0499  | 39.55 |
| 600237 | 2015 | -0.45 | 0.09 | 1.872506 | 3.5062785  | 21.44617 | 0.006315 | 16.76 |
| 630    | 2015 | -0.83 | 0.09 | 1.872506 | 3.5062785  | 24.51126 | -0.0499  | 39.55 |
| 630    | 2015 | -0.39 | 0.09 | 1.872506 | 3.5062785  | 24.51126 | -0.0499  | 39.55 |
| 630    | 2015 | -0.29 | 0.09 | 1.872506 | 3.5062785  | 24.51126 | -0.0499  | 39.55 |
| 630    | 2015 | -0.1  | 0.09 | 1.872506 | 3.5062785  | 24.51126 | -0.0499  | 39.55 |
| 2136   | 2015 | -0.33 | 0.09 | 1.872506 | 3.5062785  | 20.67289 | -0.28679 | 30.91 |
| 630    | 2015 | -0.29 | 0.09 | 1.872506 | 3.5062785  | 24.51126 | -0.0499  | 39.55 |
| 630    | 2015 | -0.29 | 0.09 | 1.872506 | 3.5062785  | 24.51126 | -0.0499  | 39.55 |
| 630    | 2015 | -0.34 | 0.09 | 1.872506 | 3.5062785  | 24.51126 | -0.0499  | 39.55 |
| 600470 | 2015 | -0.07 | 0.09 | 1.872506 | 3.5062785  | 22.54499 | 0.017979 | 25.49 |
| 600237 | 2015 | -0.45 | 0.09 | 1.872506 | 3.5062785  | 21.44617 | 0.006315 | 16.76 |
| 630    | 2015 | -0.83 | 0.09 | 1.872506 | 3.5062785  | 24.51126 | -0.0499  | 39.55 |
| 2136   | 2015 | -0.33 | 0.09 | 1.872506 | 3.5062785  | 20.6559  | -0.28679 | 30.91 |
| 600237 | 2015 | -0.45 | 0.09 | 1.872506 | 3.5062785  | 21.44617 | 0.006315 | 16.76 |
| 600470 | 2015 | -0.19 | 0.09 | 1.872506 | 3.5062785  | 22.54499 | 0.017979 | 25.49 |
| 630    | 2015 | -0.24 | 0.09 | 1.872506 | 3.5062785  | 24.51126 | -0.0499  | 39.55 |
| 630    | 2015 | -0.39 | 0.09 | 1.872506 | 3.5062785  | 24.51126 | -0.0499  | 39.55 |
| 600237 | 2015 | -0.45 | 0.09 | 1.872506 | 3.5062785  | 21.44617 | 0.006315 | 16.76 |
| 600577 | 2015 | -0.61 | 0.09 | 1.872506 | 3.5062785  | 22.21906 | 0.046856 | 21.8  |
| 600577 | 2015 | -0.54 | 0.09 | 1.872506 | 3.5062785  | 22.21906 | 0.046856 | 21.8  |
| 630    | 2015 | -0.29 | 0.09 | 1.872506 | 3.5062785  | 24.51126 | -0.0499  | 39.55 |
| 630    | 2015 | -0.25 | 0.09 | 1.872506 | 3.5062785  | 24.51126 | -0.0499  | 39.55 |
| 600470 | 2015 | -0.25 | 0.09 | 1.872506 | 3.5062785  | 22.54499 | 0.017979 | 25.49 |
| 630    | 2015 | -0.29 | 0.09 | 1.872506 | 3.5062785  | 24.51126 | -0.0499  | 39.55 |
| 600470 | 2015 | 0.201 | 0.09 | 1.872506 | 3.5062785  | 22.54499 | 0.017979 | 25.49 |
| 630    | 2015 | -0.29 | 0.09 | 1.872506 | 3.5062785  | 24.51126 | -0.0499  | 39.55 |
| 600577 | 2015 | -0.54 | 0.09 | 1.872506 | 3.5062785  | 22.21906 | 0.046856 | 21.8  |
| 630    | 2015 | -0.04 | 0.09 | 1.872506 | 3.5062785  | 24.51126 | -0.0499  | 39.55 |
| 600237 | 2015 | -0.45 | 0.09 | 1.872506 | 3.5062785  | 21.44617 | 0.006315 | 16.76 |
| 600470 | 2015 | 0.613 | 0.09 | 1.872506 | 3.5062785  | 22.54499 | 0.017979 | 25.49 |
| 600577 | 2015 | -0.54 | 0.09 | 1.872506 | 3.5062785  | 21.69073 | 0.046856 | 21.8  |
| 600577 | 2015 | -0.03 | 0.09 | 1.872506 | 3.5062785  | 22.21906 | 0.046856 | 21.8  |
| 600237 | 2015 | -0.45 | 0.09 | 1.872506 | 3.5062785  | 21.44617 | 0.006315 | 16.76 |
| 595    | 2015 | 0.046 | 0.03 | 1.129908 | 1.2766923  | 20.91318 | -0.18389 | 53.43 |
| 862    | 2015 | -0.47 | 0.03 | 1.129908 | 1.2766923  | 22.95991 | -0.07131 | 52.91 |
| 862    | 2015 | -0.47 | 0.03 | 1.129908 | 1.2766923  | 22.95991 | -0.07131 | 52.91 |
| 595    | 2015 | 0.068 | 0.03 | 1.129908 | 1.2766923  | 20.91318 | -0.18389 | 53.43 |
| 862    | 2015 | -0.47 | 0.03 | 1.129908 | 1.2766923  | 22.95991 | -0.07131 | 52.91 |
| 862    | 2015 | -0.47 | 0.03 | 1.129908 | 1.2766923  | 22.68036 | -0.07131 | 52.91 |

|        |      |       |      |          |            |          |          |       |
|--------|------|-------|------|----------|------------|----------|----------|-------|
| 862    | 2015 | -0.47 | 0.03 | 1.129908 | 1.2766923  | 22.95991 | -0.07131 | 52.91 |
| 862    | 2015 | -0.47 | 0.03 | 1.129908 | 1.2766923  | 22.95991 | -0.07131 | 52.91 |
| 595    | 2015 | 0.046 | 0.03 | 1.129908 | 1.2766923  | 20.91318 | -0.18389 | 53.43 |
| 595    | 2015 | 0.027 | 0.03 | 1.129908 | 1.2766923  | 20.94342 | -0.18389 | 53.43 |
| 862    | 2015 | -0.47 | 0.03 | 1.129908 | 1.2766923  | 22.95991 | -0.07131 | 52.91 |
| 862    | 2015 | -0.47 | 0.03 | 1.129908 | 1.2766923  | 22.95991 | -0.07131 | 52.91 |
| 862    | 2015 | -0.47 | 0.03 | 1.129908 | 1.2766923  | 22.95991 | -0.07131 | 52.91 |
| 603399 | 2015 | -0.16 | 0.01 | 0.172663 | 0.02981265 | 21.75959 | -0.22721 | 21.42 |
| 603399 | 2015 | -0.16 | 0.01 | 0.172663 | 0.02981265 | 21.82024 | -0.22721 | 21.42 |
| 603399 | 2015 | -0.16 | 0.01 | 0.172663 | 0.02981265 | 21.75959 | -0.22721 | 21.42 |
| 910    | 2015 | -0.08 | 0.09 | 0.954524 | 0.91111687 | 22.59128 | 0.161175 | 47.72 |
| 910    | 2015 | -0.08 | 0.09 | 0.954524 | 0.91111687 | 22.59128 | 0.161175 | 47.72 |
| 2223   | 2015 | -0.16 | 0.09 | 0.954524 | 0.91111687 | 21.79686 | 0.171972 | 30.32 |
| 300217 | 2015 | -0.31 | 0.09 | 0.954524 | 0.91111687 | 21.56343 | 0.042947 | 14.68 |
| 2077   | 2015 | -0.25 | 0.09 | 0.954524 | 0.91111687 | 22.38457 | -0.02363 | 69.31 |
| 2104   | 2015 | 0.932 | 0.09 | 0.954524 | 0.91111687 | 21.37597 | 0.238652 | 21.56 |
| 2223   | 2015 | -0.13 | 0.09 | 0.954524 | 0.91111687 | 21.79686 | 0.171972 | 30.32 |
| 600844 | 2015 | 0.123 | 0.09 | 0.954524 | 0.91111687 | 21.84345 | -0.03182 | 22.65 |
| 300217 | 2015 | -0.61 | 0.09 | 0.954524 | 0.91111687 | 21.56343 | 0.042947 | 14.68 |
| 2104   | 2015 | 0.932 | 0.09 | 0.954524 | 0.91111687 | 21.37597 | 0.238652 | 21.56 |
| 910    | 2015 | -0.32 | 0.09 | 0.954524 | 0.91111687 | 22.59128 | 0.161175 | 47.72 |
| 2077   | 2015 | -0.18 | 0.09 | 0.954524 | 0.91111687 | 22.38457 | -0.02363 | 69.31 |
| 600305 | 2015 | -0.08 | 0.09 | 0.954524 | 0.91111687 | 21.53946 | 0.152635 | 43.83 |
| 2223   | 2015 | -0.2  | 0.09 | 0.954524 | 0.91111687 | 21.79686 | 0.171972 | 30.32 |
| 600305 | 2015 | 0.519 | 0.09 | 0.954524 | 0.91111687 | 21.53946 | 0.152635 | 43.83 |
| 910    | 2015 | 0.084 | 0.09 | 0.954524 | 0.91111687 | 22.59128 | 0.161175 | 47.72 |
| 600844 | 2015 | 0.123 | 0.09 | 0.954524 | 0.91111687 | 21.05255 | -0.03182 | 22.65 |
| 2077   | 2015 | -0.25 | 0.09 | 0.954524 | 0.91111687 | 22.38457 | -0.02363 | 69.31 |
| 300217 | 2015 | -0.12 | 0.09 | 0.954524 | 0.91111687 | 21.56343 | 0.042947 | 14.68 |
| 2104   | 2015 | 0.363 | 0.09 | 0.954524 | 0.91111687 | 21.37597 | 0.238652 | 21.56 |
| 600305 | 2015 | 0.519 | 0.09 | 0.954524 | 0.91111687 | 21.53946 | 0.152635 | 43.83 |
| 910    | 2015 | -0.08 | 0.09 | 0.954524 | 0.91111687 | 22.59128 | 0.161175 | 47.72 |
| 910    | 2015 | -0.02 | 0.09 | 0.954524 | 0.91111687 | 22.59128 | 0.161175 | 47.72 |
| 2104   | 2015 | 0.932 | 0.09 | 0.954524 | 0.91111687 | 21.37597 | 0.238652 | 21.56 |
| 600844 | 2015 | 0.123 | 0.09 | 0.954524 | 0.91111687 | 21.84345 | -0.03182 | 22.65 |
| 2223   | 2015 | 0.215 | 0.09 | 0.954524 | 0.91111687 | 21.79686 | 0.171972 | 30.32 |
| 300217 | 2015 | -0.35 | 0.09 | 0.954524 | 0.91111687 | 21.45461 | 0.042947 | 14.68 |
| 600305 | 2015 | -0.08 | 0.09 | 0.954524 | 0.91111687 | 21.53946 | 0.152635 | 43.83 |
| 910    | 2015 | -0.02 | 0.09 | 0.954524 | 0.91111687 | 22.59128 | 0.161175 | 47.72 |
| 910    | 2015 | -0.08 | 0.09 | 0.954524 | 0.91111687 | 22.59128 | 0.161175 | 47.72 |
| 910    | 2015 | -0.08 | 0.09 | 0.954524 | 0.91111687 | 22.59128 | 0.161175 | 47.72 |
| 910    | 2015 | -0.08 | 0.09 | 0.954524 | 0.91111687 | 22.59128 | 0.161175 | 47.72 |
| 910    | 2015 | -0.08 | 0.09 | 0.954524 | 0.91111687 | 22.59128 | 0.161175 | 47.72 |
| 600305 | 2015 | 0.519 | 0.09 | 0.954524 | 0.91111687 | 21.53946 | 0.152635 | 43.83 |
| 600305 | 2015 | 0.137 | 0.09 | 0.954524 | 0.91111687 | 21.53946 | 0.152635 | 43.83 |
| 2223   | 2015 | -0.09 | 0.09 | 0.954524 | 0.91111687 | 21.79686 | 0.171972 | 30.32 |
| 910    | 2015 | -0.08 | 0.09 | 0.954524 | 0.91111687 | 22.59128 | 0.161175 | 47.72 |
| 2077   | 2015 | -0.25 | 0.09 | 0.954524 | 0.91111687 | 22.21672 | -0.02363 | 69.31 |
| 600746 | 2015 | -0.32 | 0.09 | 0.954524 | 0.91111687 | 20.10336 | -0.04867 | 54.81 |
| 2223   | 2015 | -0.32 | 0.09 | 0.954524 | 0.91111687 | 21.79686 | 0.171972 | 30.32 |
| 2223   | 2015 | -0.15 | 0.09 | 0.954524 | 0.91111687 | 21.76607 | 0.171972 | 30.32 |
| 600844 | 2015 | 0.123 | 0.09 | 0.954524 | 0.91111687 | 21.84345 | -0.03182 | 22.65 |
| 910    | 2015 | -0.08 | 0.09 | 0.954524 | 0.91111687 | 22.59128 | 0.161175 | 47.72 |
| 600305 | 2015 | 0.267 | 0.09 | 0.954524 | 0.91111687 | 21.43852 | 0.152635 | 43.83 |
| 910    | 2015 | -0.25 | 0.09 | 0.954524 | 0.91111687 | 22.28508 | 0.161175 | 47.72 |

|        |      |       |      |          |            |          |          |        |
|--------|------|-------|------|----------|------------|----------|----------|--------|
| 600746 | 2015 | -0.32 | 0.09 | 0.954524 | 0.91111687 | 20.10336 | -0.04867 | 54.81  |
| 910    | 2015 | -0.08 | 0.09 | 0.954524 | 0.91111687 | 22.59128 | 0.161175 | 47.72  |
| 910    | 2015 | -0.08 | 0.09 | 0.954524 | 0.91111687 | 22.59128 | 0.161175 | 47.72  |
| 300217 | 2015 | -0.22 | 0.09 | 0.954524 | 0.91111687 | 21.56343 | 0.042947 | 14.68  |
| 910    | 2015 | -0.26 | 0.09 | 0.954524 | 0.91111687 | 22.59128 | 0.161175 | 47.72  |
| 2077   | 2015 | -0.61 | 0.09 | 0.954524 | 0.91111687 | 22.38457 | -0.02363 | 69.31  |
| 910    | 2015 | -0.08 | 0.09 | 0.954524 | 0.91111687 | 22.59128 | 0.161175 | 47.72  |
| 2223   | 2015 | -0.32 | 0.09 | 0.954524 | 0.91111687 | 21.79686 | 0.171972 | 30.32  |
| 2104   | 2015 | 0.363 | 0.09 | 0.954524 | 0.91111687 | 21.37597 | 0.238652 | 21.56  |
| 600844 | 2015 | 0.123 | 0.09 | 0.954524 | 0.91111687 | 21.84345 | -0.03182 | 22.65  |
| 600305 | 2015 | 0.519 | 0.09 | 0.954524 | 0.91111687 | 21.53946 | 0.152635 | 43.83  |
| 2104   | 2015 | 0.385 | 0.09 | 0.954524 | 0.91111687 | 21.37597 | 0.238652 | 21.56  |
| 2104   | 2015 | 0.363 | 0.09 | 0.954524 | 0.91111687 | 21.35571 | 0.238652 | 21.56  |
| 600305 | 2015 | 0.267 | 0.09 | 0.954524 | 0.91111687 | 21.53946 | 0.152635 | 43.83  |
| 910    | 2015 | -0.74 | 0.09 | 0.954524 | 0.91111687 | 22.59128 | 0.161175 | 47.72  |
| 910    | 2015 | -0.74 | 0.09 | 0.954524 | 0.91111687 | 22.59128 | 0.161175 | 47.72  |
| 2077   | 2015 | -0.25 | 0.09 | 0.954524 | 0.91111687 | 22.38457 | -0.02363 | 69.31  |
| 300217 | 2015 | -0.35 | 0.09 | 0.954524 | 0.91111687 | 21.56343 | 0.042947 | 14.68  |
| 910    | 2015 | -0.45 | 0.09 | 0.954524 | 0.91111687 | 22.59128 | 0.161175 | 47.72  |
| 600746 | 2015 | -0.32 | 0.09 | 0.954524 | 0.91111687 | 20.10336 | -0.04867 | 54.81  |
| 600305 | 2015 | 0.519 | 0.09 | 0.954524 | 0.91111687 | 21.53946 | 0.152635 | 43.83  |
| 2223   | 2015 | -0.16 | 0.09 | 0.954524 | 0.91111687 | 21.79686 | 0.171972 | 30.32  |
| 600881 | 2015 | -0.43 | 0.27 | 1.42215  | 2.0225114  | 24.70836 | -0.03624 | 11.35  |
| 600110 | 2015 | 0.688 | 0.27 | 1.42215  | 2.0225114  | 21.84847 | 0.05772  | 7.84   |
| 600148 | 2015 | -0.06 | 0.27 | 1.42215  | 2.0225114  | 20.5443  | 0.018983 | 32.07  |
| 2338   | 2015 | 0.174 | 0.27 | 1.42215  | 2.0225114  | 20.71076 | 0.059453 | 42.65  |
| 600148 | 2015 | -0.1  | 0.27 | 1.42215  | 2.0225114  | 20.5443  | 0.018983 | 32.07  |
| 300396 | 2015 | 0.641 | 0.27 | 1.42215  | 2.0225114  | 21.29252 | 0.093276 | 53.8   |
| 600742 | 2015 | -0.91 | 0.27 | 1.42215  | 2.0225114  | 22.68705 | 0.101268 | 20.14  |
| 30     | 2015 | -0.55 | 0.27 | 1.42215  | 2.0225114  | 22.81332 | 0.103554 | 24.41  |
| 600742 | 2015 | -0.91 | 0.27 | 1.42215  | 2.0225114  | 22.68705 | 0.101268 | 20.14  |
| 600110 | 2015 | 0.688 | 0.27 | 1.42215  | 2.0225114  | 21.84847 | 0.05772  | 7.84   |
| 2338   | 2015 | 0.278 | 0.27 | 1.42215  | 2.0225114  | 20.71076 | 0.059453 | 42.65  |
| 600333 | 2015 | -0.58 | 0.27 | 1.42215  | 2.0225114  | 22.24998 | -0.20832 | 52.57  |
| 600189 | 2015 | 0.332 | 0.27 | 1.42215  | 2.0225114  | 22.25023 | 0.019708 | 42.569 |
| 600742 | 2015 | -0.91 | 0.27 | 1.42215  | 2.0225114  | 22.68705 | 0.101268 | 20.14  |
| 600742 | 2015 | -0.91 | 0.27 | 1.42215  | 2.0225114  | 22.68705 | 0.101268 | 20.14  |
| 30     | 2015 | -0.55 | 0.27 | 1.42215  | 2.0225114  | 22.81332 | 0.103554 | 24.41  |
| 30     | 2015 | -0.44 | 0.27 | 1.42215  | 2.0225114  | 22.49341 | 0.103554 | 24.41  |
| 2338   | 2015 | 0.695 | 0.27 | 1.42215  | 2.0225114  | 20.47596 | 0.059453 | 42.65  |
| 2232   | 2015 | 0.692 | 0.27 | 1.42215  | 2.0225114  | 21.1525  | 0.004151 | 48.67  |
| 600881 | 2015 | -0.01 | 0.27 | 1.42215  | 2.0225114  | 24.70836 | -0.03624 | 11.35  |
| 600881 | 2015 | -0.01 | 0.27 | 1.42215  | 2.0225114  | 24.70836 | -0.03624 | 11.35  |
| 30     | 2015 | -0.65 | 0.27 | 1.42215  | 2.0225114  | 22.81332 | 0.103554 | 24.41  |
| 30     | 2015 | -0.49 | 0.27 | 1.42215  | 2.0225114  | 22.81332 | 0.103554 | 24.41  |
| 600742 | 2015 | -0.91 | 0.27 | 1.42215  | 2.0225114  | 22.68705 | 0.101268 | 20.14  |
| 600333 | 2015 | -0.58 | 0.27 | 1.42215  | 2.0225114  | 22.28233 | -0.20832 | 52.57  |
| 661    | 2015 | 0.967 | 0.27 | 1.42215  | 2.0225114  | 20.78732 | 0.221133 | 22.28  |
| 30     | 2015 | -0.6  | 0.27 | 1.42215  | 2.0225114  | 22.81332 | 0.103554 | 24.41  |
| 600742 | 2015 | -0.91 | 0.27 | 1.42215  | 2.0225114  | 22.68705 | 0.101268 | 20.14  |
| 600110 | 2015 | 0.103 | 0.27 | 1.42215  | 2.0225114  | 21.84847 | 0.05772  | 7.84   |
| 30     | 2015 | -0.57 | 0.27 | 1.42215  | 2.0225114  | 22.81332 | 0.103554 | 24.41  |
| 300396 | 2015 | 0.715 | 0.27 | 1.42215  | 2.0225114  | 21.29252 | 0.093276 | 53.8   |
| 30     | 2015 | -0.55 | 0.27 | 1.42215  | 2.0225114  | 22.81332 | 0.103554 | 24.41  |

|        |      |       |      |         |           |          |          |        |
|--------|------|-------|------|---------|-----------|----------|----------|--------|
| 600110 | 2015 | 0.688 | 0.27 | 1.42215 | 2.0225114 | 21.84847 | 0.05772  | 7.84   |
| 600189 | 2015 | 0.332 | 0.27 | 1.42215 | 2.0225114 | 22.25023 | 0.019708 | 42.569 |
| 600110 | 2015 | 0.239 | 0.27 | 1.42215 | 2.0225114 | 21.84847 | 0.05772  | 7.84   |
| 2232   | 2015 | 0.692 | 0.27 | 1.42215 | 2.0225114 | 21.24311 | 0.004151 | 48.67  |
| 600148 | 2015 | -0.55 | 0.27 | 1.42215 | 2.0225114 | 20.5443  | 0.018983 | 32.07  |
| 661    | 2015 | 0.28  | 0.27 | 1.42215 | 2.0225114 | 22.06234 | 0.221133 | 22.28  |
| 300396 | 2015 | 0.813 | 0.27 | 1.42215 | 2.0225114 | 21.29252 | 0.093276 | 53.8   |
| 2232   | 2015 | 0.437 | 0.27 | 1.42215 | 2.0225114 | 21.24311 | 0.004151 | 48.67  |
| 600148 | 2015 | -0.06 | 0.27 | 1.42215 | 2.0225114 | 20.17635 | 0.018983 | 32.07  |
| 2232   | 2015 | 0.437 | 0.27 | 1.42215 | 2.0225114 | 21.24311 | 0.004151 | 48.67  |
| 661    | 2015 | 0.814 | 0.27 | 1.42215 | 2.0225114 | 22.06234 | 0.221133 | 22.28  |
| 661    | 2015 | 0.967 | 0.27 | 1.42215 | 2.0225114 | 22.06234 | 0.221133 | 22.28  |
| 600881 | 2015 | -0.01 | 0.27 | 1.42215 | 2.0225114 | 24.70836 | -0.03624 | 11.35  |
| 600148 | 2015 | -0.55 | 0.27 | 1.42215 | 2.0225114 | 20.5443  | 0.018983 | 32.07  |
| 600110 | 2015 | 0.688 | 0.27 | 1.42215 | 2.0225114 | 21.84847 | 0.05772  | 7.84   |
| 30     | 2015 | -0.65 | 0.27 | 1.42215 | 2.0225114 | 22.81332 | 0.103554 | 24.41  |
| 30     | 2015 | -0.58 | 0.27 | 1.42215 | 2.0225114 | 22.81332 | 0.103554 | 24.41  |
| 30     | 2015 | -0.55 | 0.27 | 1.42215 | 2.0225114 | 22.81332 | 0.103554 | 24.41  |
| 600110 | 2015 | 0.019 | 0.27 | 1.42215 | 2.0225114 | 22.46801 | 0.05772  | 7.84   |
| 661    | 2015 | 0.28  | 0.27 | 1.42215 | 2.0225114 | 22.06234 | 0.221133 | 22.28  |
| 600742 | 2015 | -0.91 | 0.27 | 1.42215 | 2.0225114 | 22.68705 | 0.101268 | 20.14  |
| 600742 | 2015 | -0.91 | 0.27 | 1.42215 | 2.0225114 | 22.68705 | 0.101268 | 20.14  |
| 600881 | 2015 | -0.99 | 0.27 | 1.42215 | 2.0225114 | 24.70836 | -0.03624 | 11.35  |
| 2338   | 2015 | 1.21  | 0.27 | 1.42215 | 2.0225114 | 20.71076 | 0.059453 | 42.65  |
| 600881 | 2015 | -0.01 | 0.27 | 1.42215 | 2.0225114 | 24.70836 | -0.03624 | 11.35  |
| 300396 | 2015 | 0.984 | 0.27 | 1.42215 | 2.0225114 | 21.29252 | 0.093276 | 53.8   |
| 661    | 2015 | 0.861 | 0.27 | 1.42215 | 2.0225114 | 22.06234 | 0.221133 | 22.28  |
| 30     | 2015 | -0.55 | 0.27 | 1.42215 | 2.0225114 | 22.81332 | 0.103554 | 24.41  |
| 600881 | 2015 | -0.01 | 0.27 | 1.42215 | 2.0225114 | 24.70836 | -0.03624 | 11.35  |
| 30     | 2015 | -0.55 | 0.27 | 1.42215 | 2.0225114 | 22.81332 | 0.103554 | 24.41  |
| 600742 | 2015 | -0.91 | 0.27 | 1.42215 | 2.0225114 | 22.68705 | 0.101268 | 20.14  |
| 600881 | 2015 | -0.01 | 0.27 | 1.42215 | 2.0225114 | 24.70836 | -0.03624 | 11.35  |
| 300396 | 2015 | 0.65  | 0.27 | 1.42215 | 2.0225114 | 21.06309 | 0.093276 | 53.8   |
| 600110 | 2015 | 0.002 | 0.27 | 1.42215 | 2.0225114 | 21.84847 | 0.05772  | 7.84   |
| 600110 | 2015 | 0.688 | 0.27 | 1.42215 | 2.0225114 | 21.84847 | 0.05772  | 7.84   |
| 30     | 2015 | -0.6  | 0.27 | 1.42215 | 2.0225114 | 22.81332 | 0.098955 | 24.41  |
| 600881 | 2015 | -0.01 | 0.27 | 1.42215 | 2.0225114 | 24.70836 | -0.03624 | 11.35  |
| 600189 | 2015 | -0.9  | 0.27 | 1.42215 | 2.0225114 | 22.20862 | 0.019708 | 42.569 |
| 661    | 2015 | 0.967 | 0.27 | 1.42215 | 2.0225114 | 22.06234 | 0.221133 | 22.28  |
| 600742 | 2015 | -0.91 | 0.27 | 1.42215 | 2.0225114 | 22.27426 | 0.101268 | 20.14  |
| 600742 | 2015 | -0.91 | 0.27 | 1.42215 | 2.0225114 | 22.68705 | 0.101268 | 20.14  |
| 2338   | 2015 | -0.11 | 0.27 | 1.42215 | 2.0225114 | 20.71076 | 0.059453 | 42.65  |
| 2338   | 2015 | 1.21  | 0.27 | 1.42215 | 2.0225114 | 20.71076 | 0.059453 | 42.65  |
| 30     | 2015 | -0.55 | 0.27 | 1.42215 | 2.0225114 | 22.81332 | 0.103554 | 24.41  |
| 600189 | 2015 | -0.99 | 0.27 | 1.42215 | 2.0225114 | 22.25023 | 0.019708 | 42.569 |
| 600742 | 2015 | -0.91 | 0.27 | 1.42215 | 2.0225114 | 22.68705 | 0.101268 | 20.14  |
| 600881 | 2015 | -0.43 | 0.27 | 1.42215 | 2.0225114 | 24.70836 | -0.03624 | 11.35  |
| 600189 | 2015 | -0.99 | 0.27 | 1.42215 | 2.0225114 | 22.25023 | 0.019708 | 42.569 |
| 2338   | 2015 | 0.049 | 0.27 | 1.42215 | 2.0225114 | 20.71076 | 0.059453 | 42.65  |
| 600881 | 2015 | -0.01 | 0.27 | 1.42215 | 2.0225114 | 24.70836 | -0.03624 | 11.35  |
| 2338   | 2015 | -0.11 | 0.27 | 1.42215 | 2.0225114 | 20.71076 | 0.059453 | 42.65  |
| 300396 | 2015 | 0.647 | 0.27 | 1.42215 | 2.0225114 | 21.29252 | 0.093276 | 53.8   |
| 600110 | 2015 | 0.688 | 0.27 | 1.42215 | 2.0225114 | 21.84847 | 0.05772  | 7.84   |
| 30     | 2015 | -0.55 | 0.27 | 1.42215 | 2.0225114 | 22.81332 | 0.103554 | 24.41  |

|        |      |       |      |          |           |          |          |        |
|--------|------|-------|------|----------|-----------|----------|----------|--------|
| 2338   | 2015 | 0.278 | 0.27 | 1.42215  | 2.0225114 | 20.71076 | 0.059453 | 42.65  |
| 2232   | 2015 | 0.65  | 0.27 | 1.42215  | 2.0225114 | 21.24311 | 0.004151 | 48.67  |
| 600881 | 2015 | -0.01 | 0.27 | 1.42215  | 2.0225114 | 24.36742 | -0.03624 | 11.35  |
| 661    | 2015 | 0.724 | 0.27 | 1.42215  | 2.0225114 | 22.06234 | 0.221133 | 22.28  |
| 2232   | 2015 | 0.437 | 0.27 | 1.42215  | 2.0225114 | 21.24311 | 0.004151 | 48.67  |
| 600333 | 2015 | -0.58 | 0.27 | 1.42215  | 2.0225114 | 22.28233 | -0.20832 | 52.57  |
| 300396 | 2015 | 0.778 | 0.27 | 1.42215  | 2.0225114 | 21.29252 | 0.093276 | 53.8   |
| 600110 | 2015 | 0.688 | 0.27 | 1.42215  | 2.0225114 | 21.84847 | 0.05772  | 7.84   |
| 600742 | 2015 | -0.91 | 0.27 | 1.42215  | 2.0225114 | 22.68705 | 0.101268 | 20.14  |
| 30     | 2015 | -0.55 | 0.27 | 1.42215  | 2.0225114 | 22.81332 | 0.103554 | 24.41  |
| 600110 | 2015 | -0.17 | 0.27 | 1.42215  | 2.0225114 | 21.84847 | 0.05772  | 7.84   |
| 2232   | 2015 | 0.437 | 0.27 | 1.42215  | 2.0225114 | 21.24311 | 0.004151 | 48.67  |
| 2397   | 2015 | -0.64 | 1.03 | 1.100749 | 1.2116491 | 21.46034 | 0.111934 | 37.79  |
| 998    | 2015 | 1.073 | 1.03 | 1.100749 | 1.2116491 | 22.33745 | 0.190471 | 14.49  |
| 603998 | 2015 | 0.702 | 1.03 | 1.100749 | 1.2116491 | 20.78781 | 0.104012 | 36.69  |
| 300267 | 2015 | 0.055 | 1.03 | 1.100749 | 1.2116491 | 22.28886 | 0.137484 | 45.82  |
| 2261   | 2015 | -0.24 | 1.03 | 1.100749 | 1.2116491 | 22.1873  | 0.060074 | 17.27  |
| 2097   | 2015 | -0.32 | 1.03 | 1.100749 | 1.2116491 | 22.57492 | -0.01454 | 21.71  |
| 300187 | 2015 | 0.133 | 1.03 | 1.100749 | 1.2116491 | 21.42344 | 0.082657 | 62.67  |
| 600731 | 2015 | -0.57 | 1.03 | 1.100749 | 1.2116491 | 21.34117 | 0.026927 | 22.91  |
| 300267 | 2015 | 0.269 | 1.03 | 1.100749 | 1.2116491 | 22.28886 | 0.137484 | 45.82  |
| 300015 | 2015 | -0.96 | 1.03 | 1.100749 | 1.2116491 | 21.90396 | 0.174688 | 42     |
| 300267 | 2015 | 0.278 | 1.03 | 1.100749 | 1.2116491 | 22.28886 | 0.137484 | 45.82  |
| 603998 | 2015 | 0.702 | 1.03 | 1.100749 | 1.2116491 | 20.78781 | 0.104012 | 36.69  |
| 600731 | 2015 | 0.249 | 1.03 | 1.100749 | 1.2116491 | 21.34117 | 0.026927 | 22.91  |
| 932    | 2015 | -0.63 | 1.03 | 1.100749 | 1.2116491 | 25.06054 | -0.37654 | 59.906 |
| 2533   | 2015 | -0.13 | 1.03 | 1.100749 | 1.2116491 | 21.7636  | 0.06845  | 20.82  |
| 2533   | 2015 | -0.13 | 1.03 | 1.100749 | 1.2116491 | 21.7636  | 0.06845  | 20.82  |
| 600390 | 2015 | 0.434 | 1.03 | 1.100749 | 1.2116491 | 21.40182 | -0.30173 | 27.34  |
| 600390 | 2015 | 0.434 | 1.03 | 1.100749 | 1.2116491 | 21.54859 | -0.30173 | 27.34  |
| 2452   | 2015 | -0.65 | 1.03 | 1.100749 | 1.2116491 | 21.32353 | 0.054506 | 21.07  |
| 600478 | 2015 | 0.168 | 1.03 | 1.100749 | 1.2116491 | 22.0627  | 0.026785 | 17.69  |
| 600390 | 2015 | 0.434 | 1.03 | 1.100749 | 1.2116491 | 21.54859 | -0.30173 | 27.34  |
| 932    | 2015 | 0.249 | 1.03 | 1.100749 | 1.2116491 | 25.06054 | -0.37654 | 59.906 |
| 300338 | 2015 | 0.285 | 1.03 | 1.100749 | 1.2116491 | 20.65185 | 0.002438 | 25.89  |
| 300298 | 2015 | -0.17 | 1.03 | 1.100749 | 1.2116491 | 21.01106 | 0.115403 | 33.59  |
| 2650   | 2015 | 0.478 | 1.03 | 1.100749 | 1.2116491 | 21.71543 | 0.079849 | 40.05  |
| 600478 | 2015 | -0.38 | 1.03 | 1.100749 | 1.2116491 | 22.0627  | 0.026785 | 17.69  |
| 300338 | 2015 | -0.19 | 1.03 | 1.100749 | 1.2116491 | 20.65185 | 0.002438 | 25.89  |
| 900    | 2015 | -0.99 | 1.03 | 1.100749 | 1.2116491 | 23.65163 | 0.082056 | 27.19  |
| 2452   | 2015 | -0.65 | 1.03 | 1.100749 | 1.2116491 | 21.32353 | 0.054506 | 21.07  |
| 300267 | 2015 | 0.278 | 1.03 | 1.100749 | 1.2116491 | 22.28886 | 0.137484 | 45.82  |
| 601098 | 2015 | -0.97 | 1.03 | 1.100749 | 1.2116491 | 23.06886 | 0.148083 | 61.46  |
| 157    | 2015 | 0.254 | 1.03 | 1.100749 | 1.2116491 | 25.26361 | 0.002245 | 18.08  |
| 2533   | 2015 | 0.155 | 1.03 | 1.100749 | 1.2116491 | 21.7636  | 0.06845  | 20.82  |
| 600476 | 2015 | 0.226 | 1.03 | 1.100749 | 1.2116491 | 20.10336 | -0.2067  | 32.98  |
| 600744 | 2015 | -0.08 | 1.03 | 1.100749 | 1.2116491 | 23.70997 | 0.097971 | 34.18  |
| 989    | 2015 | -0.39 | 1.03 | 1.100749 | 1.2116491 | 22.22084 | 0.124353 | 42.33  |
| 157    | 2015 | 0.23  | 1.03 | 1.100749 | 1.2116491 | 25.26361 | 0.002245 | 18.08  |
| 2297   | 2015 | 0.483 | 1.03 | 1.100749 | 1.2116491 | 20.97575 | -0.13355 | 18.17  |
| 600390 | 2015 | 0.434 | 1.03 | 1.100749 | 1.2116491 | 21.54859 | -0.30173 | 27.34  |
| 600478 | 2015 | -0.06 | 1.03 | 1.100749 | 1.2116491 | 22.0627  | 0.026785 | 17.69  |
| 600744 | 2015 | -0.27 | 1.03 | 1.100749 | 1.2116491 | 23.70997 | 0.097971 | 34.18  |
| 2452   | 2015 | -0.65 | 1.03 | 1.100749 | 1.2116491 | 21.32353 | 0.054506 | 21.07  |

|        |      |       |      |          |           |          |          |        |
|--------|------|-------|------|----------|-----------|----------|----------|--------|
| 600478 | 2015 | 0.491 | 1.03 | 1.100749 | 1.2116491 | 22.0627  | 0.026785 | 17.69  |
| 300338 | 2015 | 0.285 | 1.03 | 1.100749 | 1.2116491 | 20.65185 | 0.002438 | 25.89  |
| 2097   | 2015 | -0.32 | 1.03 | 1.100749 | 1.2116491 | 22.57492 | -0.01454 | 21.71  |
| 157    | 2015 | -0.08 | 1.03 | 1.100749 | 1.2116491 | 25.26361 | 0.002245 | 18.08  |
| 2452   | 2015 | -0.65 | 1.03 | 1.100749 | 1.2116491 | 21.32353 | 0.054506 | 21.07  |
| 989    | 2015 | 0.686 | 1.03 | 1.100749 | 1.2116491 | 22.86441 | 0.124353 | 42.33  |
| 2261   | 2015 | 0.532 | 1.03 | 1.100749 | 1.2116491 | 22.1873  | 0.060074 | 17.27  |
| 900    | 2015 | -0.99 | 1.03 | 1.100749 | 1.2116491 | 23.65163 | 0.082056 | 27.19  |
| 300267 | 2015 | 0.398 | 1.03 | 1.100749 | 1.2116491 | 22.28886 | 0.137484 | 45.82  |
| 157    | 2015 | 0.053 | 1.03 | 1.100749 | 1.2116491 | 25.26361 | 0.002245 | 18.08  |
| 300187 | 2015 | 0.133 | 1.03 | 1.100749 | 1.2116491 | 21.56082 | 0.082657 | 62.67  |
| 2533   | 2015 | -0    | 1.03 | 1.100749 | 1.2116491 | 21.7636  | 0.06845  | 20.82  |
| 157    | 2015 | -0.01 | 1.03 | 1.100749 | 1.2116491 | 25.26361 | 0.002806 | 18.08  |
| 2397   | 2015 | -0.64 | 1.03 | 1.100749 | 1.2116491 | 21.40487 | 0.111934 | 37.79  |
| 989    | 2015 | -0    | 1.03 | 1.100749 | 1.2116491 | 22.22084 | 0.124353 | 42.33  |
| 157    | 2015 | 0.23  | 1.03 | 1.100749 | 1.2116491 | 25.26361 | 0.002245 | 18.08  |
| 600744 | 2015 | -0.27 | 1.03 | 1.100749 | 1.2116491 | 23.70997 | 0.097971 | 34.18  |
| 2261   | 2015 | 1.088 | 1.03 | 1.100749 | 1.2116491 | 22.1873  | 0.060074 | 17.27  |
| 2261   | 2015 | 1.088 | 1.03 | 1.100749 | 1.2116491 | 22.1873  | 0.060074 | 17.27  |
| 2261   | 2015 | 1.088 | 1.03 | 1.100749 | 1.2116491 | 22.1873  | 0.060074 | 17.27  |
| 932    | 2015 | 0.249 | 1.03 | 1.100749 | 1.2116491 | 23.55292 | -0.37654 | 59.906 |
| 601098 | 2015 | -0.97 | 1.03 | 1.100749 | 1.2116491 | 23.54005 | 0.148083 | 61.46  |
| 2097   | 2015 | -0.32 | 1.03 | 1.100749 | 1.2116491 | 22.57492 | -0.01454 | 21.71  |
| 2097   | 2015 | -0.32 | 1.03 | 1.100749 | 1.2116491 | 22.57492 | -0.01454 | 21.71  |
| 600478 | 2015 | -0.38 | 1.03 | 1.100749 | 1.2116491 | 22.0627  | 0.026785 | 17.69  |
| 300358 | 2015 | 0.129 | 1.03 | 1.100749 | 1.2116491 | 21.59304 | 0.100954 | 49.88  |
| 300298 | 2015 | -0.17 | 1.03 | 1.100749 | 1.2116491 | 21.01146 | 0.115403 | 33.59  |
| 600744 | 2015 | -0.94 | 1.03 | 1.100749 | 1.2116491 | 23.70997 | 0.097971 | 34.18  |
| 300338 | 2015 | 0.285 | 1.03 | 1.100749 | 1.2116491 | 20.66193 | 0.002438 | 25.89  |
| 300187 | 2015 | -0.52 | 1.03 | 1.100749 | 1.2116491 | 21.56082 | 0.082657 | 62.67  |
| 2097   | 2015 | -0.32 | 1.03 | 1.100749 | 1.2116491 | 22.57492 | -0.01454 | 21.71  |
| 2097   | 2015 | -0.32 | 1.03 | 1.100749 | 1.2116491 | 22.57492 | -0.01454 | 21.71  |
| 989    | 2015 | 0.245 | 1.03 | 1.100749 | 1.2116491 | 22.22084 | 0.124353 | 42.33  |
| 2297   | 2015 | 0.483 | 1.03 | 1.100749 | 1.2116491 | 21.28289 | -0.13355 | 18.17  |
| 157    | 2015 | 0.23  | 1.03 | 1.100749 | 1.2116491 | 25.26361 | 0.002245 | 18.08  |
| 900    | 2015 | -0.99 | 1.03 | 1.100749 | 1.2116491 | 23.62176 | 0.082056 | 27.19  |
| 998    | 2015 | 1.073 | 1.03 | 1.100749 | 1.2116491 | 22.2988  | 0.190471 | 14.49  |
| 300015 | 2015 | -0.96 | 1.03 | 1.100749 | 1.2116491 | 21.90396 | 0.174688 | 42     |
| 300358 | 2015 | 0.129 | 1.03 | 1.100749 | 1.2116491 | 21.50056 | 0.100954 | 49.88  |
| 603998 | 2015 | 0.588 | 1.03 | 1.100749 | 1.2116491 | 20.78781 | 0.104012 | 36.69  |
| 600744 | 2015 | -0.27 | 1.03 | 1.100749 | 1.2116491 | 23.70997 | 0.097971 | 34.18  |
| 900    | 2015 | -0.99 | 1.03 | 1.100749 | 1.2116491 | 23.65163 | 0.082056 | 27.19  |
| 2261   | 2015 | 0.643 | 1.03 | 1.100749 | 1.2116491 | 22.1873  | 0.060074 | 17.27  |
| 998    | 2015 | 1.073 | 1.03 | 1.100749 | 1.2116491 | 22.33745 | 0.190471 | 14.49  |
| 2533   | 2015 | 0.184 | 1.03 | 1.100749 | 1.2116491 | 21.27239 | 0.06845  | 20.82  |
| 2533   | 2015 | -0.51 | 1.03 | 1.100749 | 1.2116491 | 21.7636  | 0.06845  | 20.82  |
| 2397   | 2015 | -0.64 | 1.03 | 1.100749 | 1.2116491 | 21.40487 | 0.111934 | 37.79  |
| 932    | 2015 | 0.249 | 1.03 | 1.100749 | 1.2116491 | 25.06054 | -0.37654 | 59.906 |
| 600744 | 2015 | -0.27 | 1.03 | 1.100749 | 1.2116491 | 23.70997 | 0.097971 | 34.18  |
| 157    | 2015 | -0.07 | 1.03 | 1.100749 | 1.2116491 | 25.26361 | 0.002245 | 18.08  |
| 157    | 2015 | 0.23  | 1.03 | 1.100749 | 1.2116491 | 25.26361 | 0.002245 | 18.08  |
| 989    | 2015 | -0    | 1.03 | 1.100749 | 1.2116491 | 22.22084 | 0.124353 | 42.33  |
| 601098 | 2015 | -0.97 | 1.03 | 1.100749 | 1.2116491 | 23.54005 | 0.148083 | 61.46  |
| 2097   | 2015 | -0.32 | 1.03 | 1.100749 | 1.2116491 | 22.56685 | -0.01454 | 21.71  |



|        |      |       |      |          |           |          |          |        |
|--------|------|-------|------|----------|-----------|----------|----------|--------|
| 300345 | 2015 | -0.06 | 1.03 | 1.100749 | 1.2116491 | 20.79429 | 0.029535 | 20.26  |
| 932    | 2015 | 0.223 | 1.03 | 1.100749 | 1.2116491 | 25.06054 | -0.37654 | 59.906 |
| 300338 | 2015 | 0.28  | 1.03 | 1.100749 | 1.2116491 | 20.65185 | 0.002438 | 25.89  |
| 2261   | 2015 | 0.516 | 1.03 | 1.100749 | 1.2116491 | 22.1873  | 0.060074 | 17.27  |
| 157    | 2015 | 0.23  | 1.03 | 1.100749 | 1.2116491 | 25.26361 | 0.002245 | 18.08  |
| 300267 | 2015 | 0.278 | 1.03 | 1.100749 | 1.2116491 | 22.28886 | 0.137484 | 45.82  |
| 300338 | 2015 | 0.285 | 1.03 | 1.100749 | 1.2116491 | 20.65185 | 0.002438 | 25.89  |
| 601098 | 2015 | -0.97 | 1.03 | 1.100749 | 1.2116491 | 23.54005 | 0.148083 | 61.46  |
| 300338 | 2015 | -0.19 | 1.03 | 1.100749 | 1.2116491 | 20.65185 | 0.002438 | 25.89  |
| 300267 | 2015 | 0.57  | 1.03 | 1.100749 | 1.2116491 | 22.28886 | 0.137484 | 45.82  |
| 601098 | 2015 | -0.97 | 1.03 | 1.100749 | 1.2116491 | 23.54005 | 0.148083 | 61.46  |
| 603998 | 2015 | 0.359 | 1.03 | 1.100749 | 1.2116491 | 20.78781 | 0.104012 | 36.69  |
| 157    | 2015 | 0.168 | 1.03 | 1.100749 | 1.2116491 | 25.26361 | 0.002245 | 18.08  |
| 157    | 2015 | 0.23  | 1.03 | 1.100749 | 1.2116491 | 25.26361 | 0.002245 | 18.08  |
| 2297   | 2015 | 0.483 | 1.03 | 1.100749 | 1.2116491 | 21.28289 | -0.13355 | 18.17  |
| 989    | 2015 | -0    | 1.03 | 1.100749 | 1.2116491 | 22.22084 | 0.124353 | 42.33  |
| 300298 | 2015 | -0.17 | 1.03 | 1.100749 | 1.2116491 | 21.01106 | 0.115403 | 33.59  |
| 300267 | 2015 | 0.269 | 1.03 | 1.100749 | 1.2116491 | 22.28886 | 0.137484 | 45.82  |
| 600390 | 2015 | 0.434 | 1.03 | 1.100749 | 1.2116491 | 21.54859 | -0.30173 | 27.34  |
| 600744 | 2015 | -0.72 | 1.03 | 1.100749 | 1.2116491 | 23.70997 | 0.097971 | 34.18  |
| 2097   | 2015 | -0.32 | 1.03 | 1.100749 | 1.2116491 | 22.57492 | -0.01454 | 21.71  |
| 157    | 2015 | 0.887 | 1.03 | 1.100749 | 1.2116491 | 25.26361 | 0.002245 | 18.08  |
| 603998 | 2015 | 0.359 | 1.03 | 1.100749 | 1.2116491 | 20.78781 | 0.104012 | 36.69  |
| 300187 | 2015 | -0.52 | 1.03 | 1.100749 | 1.2116491 | 21.56082 | 0.082657 | 62.67  |
| 998    | 2015 | 1.073 | 1.03 | 1.100749 | 1.2116491 | 22.33745 | 0.190471 | 14.49  |
| 600478 | 2015 | -0.1  | 1.03 | 1.100749 | 1.2116491 | 22.0627  | 0.026785 | 17.69  |
| 600744 | 2015 | -0.94 | 1.03 | 1.100749 | 1.2116491 | 23.70997 | 0.097971 | 34.18  |
| 600478 | 2015 | -0.38 | 1.03 | 1.100749 | 1.2116491 | 22.0627  | 0.026785 | 17.69  |
| 932    | 2015 | 0.223 | 1.03 | 1.100749 | 1.2116491 | 25.06054 | -0.37654 | 59.906 |
| 989    | 2015 | -0.06 | 1.03 | 1.100749 | 1.2116491 | 22.22084 | 0.124353 | 42.33  |
| 2397   | 2015 | -0.64 | 1.03 | 1.100749 | 1.2116491 | 21.40487 | 0.111934 | 37.79  |
| 2297   | 2015 | 0.483 | 1.03 | 1.100749 | 1.2116491 | 21.28289 | -0.13355 | 18.17  |
| 2650   | 2015 | 0.478 | 1.03 | 1.100749 | 1.2116491 | 21.71543 | 0.079849 | 40.05  |
| 900    | 2015 | -0.99 | 1.03 | 1.100749 | 1.2116491 | 23.65163 | 0.082056 | 27.19  |
| 998    | 2015 | 1.073 | 1.03 | 1.100749 | 1.2116491 | 22.33745 | 0.190471 | 14.49  |
| 2452   | 2015 | -0.65 | 1.03 | 1.100749 | 1.2116491 | 21.32353 | 0.054506 | 21.07  |
| 2297   | 2015 | 0.483 | 1.03 | 1.100749 | 1.2116491 | 21.28289 | -0.13355 | 18.17  |
| 600731 | 2015 | 0.07  | 1.03 | 1.100749 | 1.2116491 | 21.34117 | 0.026927 | 22.91  |
| 300015 | 2015 | -0.96 | 1.03 | 1.100749 | 1.2116491 | 21.90396 | 0.174688 | 42     |
| 2650   | 2015 | 0.478 | 1.03 | 1.100749 | 1.2116491 | 21.63889 | 0.079849 | 40.05  |
| 157    | 2015 | 0.887 | 1.03 | 1.100749 | 1.21E+00  | 25.26361 | 0.002245 | 18.08  |
| 600744 | 2015 | -0.76 | 1.03 | 1.100749 | 1.21E+00  | 23.70997 | 0.097971 | 34.18  |
| 300345 | 2015 | -0.06 | 1.03 | 1.100749 | 1.21E+00  | 20.72707 | 0.029535 | 20.26  |
| 300015 | 2015 | -0.96 | 1.03 | 1.100749 | 1.21E+00  | 21.82155 | 0.174688 | 42     |
| 300015 | 2015 | -0.96 | 1.03 | 1.100749 | 1.21E+00  | 21.90396 | 0.174688 | 42     |
| 2650   | 2015 | 0.478 | 1.03 | 1.100749 | 1.21E+00  | 21.71543 | 0.079849 | 40.05  |
| 932    | 2015 | 0.255 | 1.03 | 1.100749 | 1.21E+00  | 25.06054 | -0.37654 | 59.906 |
| 600744 | 2015 | -0.27 | 1.03 | 1.100749 | 1.2116491 | 23.70997 | 0.097971 | 34.18  |
| 600744 | 2015 | -0.94 | 1.03 | 1.100749 | 1.2116491 | 23.70997 | 0.097971 | 34.18  |
| 989    | 2015 | 0.686 | 1.03 | 1.100749 | 1.2116491 | 22.22084 | 0.124353 | 42.33  |
| 600478 | 2015 | 0.942 | 1.03 | 1.100749 | 1.2116491 | 22.0627  | 0.026785 | 17.69  |
| 2261   | 2015 | 1.088 | 1.03 | 1.100749 | 1.2116491 | 22.06651 | 0.060074 | 17.27  |
| 989    | 2015 | -0.06 | 1.03 | 1.100749 | 1.2116491 | 22.22084 | 0.124353 | 42.33  |
| 600476 | 2015 | 0.226 | 1.03 | 1.100749 | 1.2116491 | 20.10336 | -0.2067  | 32.98  |

|        |      |       |      |          |            |          |          |       |
|--------|------|-------|------|----------|------------|----------|----------|-------|
| 2097   | 2015 | -0.32 | 1.03 | 1.100749 | 1.2116491  | 22.57492 | -0.01454 | 21.71 |
| 300015 | 2015 | -0.96 | 1.03 | 1.100749 | 1.2116491  | 21.90396 | 0.174688 | 42    |
| 600478 | 2015 | -0.38 | 1.03 | 1.100749 | 1.2116491  | 22.0627  | 0.026785 | 17.69 |
| 603998 | 2015 | 0.359 | 1.03 | 1.100749 | 1.2116491  | 20.70851 | 0.104012 | 36.69 |
| 600744 | 2015 | -0.94 | 1.03 | 1.100749 | 1.2116491  | 23.70997 | 0.097971 | 34.18 |
| 157    | 2015 | 0.053 | 1.03 | 1.100749 | 1.2116491  | 25.26361 | 0.002245 | 18.08 |
| 300338 | 2015 | 0.285 | 1.03 | 1.100749 | 1.2116491  | 20.65185 | 0.002438 | 25.89 |
| 300267 | 2015 | 0.278 | 1.03 | 1.100749 | 1.2116491  | 22.28886 | 0.137484 | 45.82 |
| 600744 | 2015 | -0.61 | 1.03 | 1.100749 | 1.2116491  | 23.70997 | 0.097971 | 34.18 |
| 600390 | 2015 | 0.434 | 1.03 | 1.100749 | 1.2116491  | 21.54859 | -0.30173 | 27.34 |
| 157    | 2015 | 0.045 | 1.03 | 1.100749 | 1.2116491  | 25.26361 | 0.002245 | 18.08 |
| 600744 | 2015 | -0.94 | 1.03 | 1.100749 | 1.2116491  | 23.70997 | 0.097971 | 34.18 |
| 300267 | 2015 | 0.278 | 1.03 | 1.100749 | 1.2116491  | 22.08025 | 0.137484 | 45.82 |
| 2533   | 2015 | -0.51 | 1.03 | 1.100749 | 1.2116491  | 21.7636  | 0.06845  | 20.82 |
| 600478 | 2015 | -0.38 | 1.03 | 1.100749 | 1.2116491  | 21.57545 | 0.026785 | 17.69 |
| 989    | 2015 | -0.15 | 1.03 | 1.100749 | 1.2116491  | 22.22084 | 0.124353 | 42.33 |
| 600478 | 2015 | 0.491 | 1.03 | 1.100749 | 1.2116491  | 22.0627  | 0.026785 | 17.69 |
| 2097   | 2015 | -0.32 | 1.03 | 1.100749 | 1.2116491  | 22.57492 | -0.01454 | 21.71 |
| 2452   | 2015 | -0.65 | 1.03 | 1.100749 | 1.2116491  | 21.25756 | 0.054506 | 21.07 |
| 989    | 2015 | -0.2  | 1.03 | 1.100749 | 1.2116491  | 22.22084 | 0.124353 | 42.33 |
| 300358 | 2015 | 0.129 | 1.03 | 1.100749 | 1.2116491  | 21.59304 | 0.100954 | 49.88 |
| 600731 | 2015 | -0.57 | 1.03 | 1.100749 | 1.2116491  | 20.8955  | 0.026927 | 22.91 |
| 2261   | 2015 | 1.088 | 1.03 | 1.100749 | 1.2116491  | 22.1873  | 0.060074 | 17.27 |
| 2261   | 2015 | 1.088 | 1.03 | 1.100749 | 1.2116491  | 22.1873  | 0.060074 | 17.27 |
| 2297   | 2015 | 0.483 | 1.03 | 1.100749 | 1.2116491  | 21.28289 | -0.13355 | 18.17 |
| 600476 | 2015 | 0.226 | 1.03 | 1.100749 | 1.2116491  | 20.10336 | -0.2067  | 32.98 |
| 300338 | 2015 | 0.285 | 1.03 | 1.100749 | 1.2116491  | 20.65185 | 0.002438 | 25.89 |
| 600744 | 2015 | -0.6  | 1.03 | 1.100749 | 1.2116491  | 23.64669 | 0.097971 | 34.18 |
| 2097   | 2015 | -0.32 | 1.03 | 1.100749 | 1.2116491  | 22.57492 | -0.01454 | 21.71 |
| 600731 | 2015 | 0.181 | 1.03 | 1.100749 | 1.2116491  | 21.34117 | 0.026927 | 22.91 |
| 600731 | 2015 | 0.224 | 1.03 | 1.100749 | 1.2116491  | 21.34117 | 0.026927 | 22.91 |
| 600731 | 2015 | -0.03 | 1.03 | 1.100749 | 1.2116491  | 21.34117 | 0.026927 | 22.91 |
| 600731 | 2015 | 0.181 | 1.03 | 1.100749 | 1.2116491  | 21.34117 | 0.026927 | 22.91 |
| 601098 | 2015 | -0.97 | 1.03 | 1.100749 | 1.2116491  | 23.54005 | 0.148083 | 61.46 |
| 998    | 2015 | 1.073 | 1.03 | 1.100749 | 1.2116491  | 22.33745 | 0.190471 | 14.49 |
| 157    | 2015 | -0.14 | 1.03 | 1.100749 | 1.2116491  | 25.09522 | 0.002245 | 18.08 |
| 600478 | 2015 | -0.38 | 1.03 | 1.100749 | 1.2116491  | 22.0627  | 0.026785 | 17.69 |
| 300187 | 2015 | 0.06  | 1.03 | 1.100749 | 1.2116491  | 21.56082 | 0.082657 | 62.67 |
| 600731 | 2015 | 0.204 | 1.03 | 1.100749 | 1.2116491  | 21.34117 | 0.026927 | 22.91 |
| 2297   | 2015 | 0.483 | 1.03 | 1.100749 | 1.2116491  | 21.28289 | -0.13355 | 18.17 |
| 300345 | 2015 | -0.06 | 1.03 | 1.100749 | 1.2116491  | 20.79429 | 0.029535 | 20.26 |
| 600731 | 2015 | 0.661 | 1.03 | 1.100749 | 1.2116491  | 21.34117 | 0.026927 | 22.91 |
| 2397   | 2015 | -0.64 | 1.03 | 1.100749 | 1.2116491  | 21.40487 | 0.111934 | 37.79 |
| 2650   | 2015 | 0.478 | 1.03 | 1.100749 | 1.2116491  | 21.71543 | 0.079849 | 40.05 |
| 300298 | 2015 | -0.17 | 1.03 | 1.100749 | 1.2116491  | 21.01106 | 0.115403 | 33.59 |
| 300158 | 2015 | 0.529 | 0    | 0.048607 | 0.00236267 | 22.12702 | 0.027169 | 59.08 |
| 601699 | 2015 | -0.06 | 0    | 0.048607 | 0.00236267 | 24.32185 | -0.00237 | 61.34 |
| 601699 | 2015 | 0.187 | 0    | 0.048607 | 0.00236267 | 24.64762 | -0.00237 | 61.34 |
| 300158 | 2015 | -0.37 | 0    | 0.048607 | 0.00236267 | 22.12702 | 0.027169 | 59.08 |
| 601699 | 2015 | -0.51 | 0    | 0.048607 | 0.00236267 | 24.32185 | -0.00237 | 61.34 |
| 300158 | 2015 | 0.529 | 0    | 0.048607 | 0.00236267 | 22.12702 | 0.027169 | 59.08 |
| 300158 | 2015 | -0.16 | 0    | 0.048607 | 0.00236267 | 22.12702 | 0.027169 | 59.08 |
| 300158 | 2015 | 0.186 | 0    | 0.048607 | 0.00236267 | 22.12702 | 0.027169 | 59.08 |
| 601699 | 2015 | 0.187 | 0    | 0.048607 | 0.00236267 | 24.64762 | -0.00237 | 61.34 |

|        |      |       |      |          |            |          |          |       |
|--------|------|-------|------|----------|------------|----------|----------|-------|
| 601699 | 2015 | -0.46 | 0    | 0.048607 | 0.00236267 | 24.64762 | -0.00237 | 61.34 |
| 601699 | 2015 | -0.02 | 0    | 0.048607 | 0.00236267 | 24.64762 | -0.00237 | 61.34 |
| 300158 | 2015 | 0.529 | 0    | 0.048607 | 0.00236267 | 22.12702 | 0.027169 | 59.08 |
| 300158 | 2015 | 0.014 | 0    | 0.048607 | 0.00236267 | 22.12702 | 0.027169 | 59.08 |
| 300158 | 2015 | 0.186 | 0    | 0.048607 | 0.00236267 | 22.12702 | 0.027169 | 59.08 |
| 300158 | 2015 | -0.19 | 0    | 0.048607 | 0.00236267 | 22.12702 | 0.027169 | 59.08 |
| 300158 | 2015 | 0.186 | 0    | 0.048607 | 0.00236267 | 22.12702 | 0.027169 | 59.08 |
| 601699 | 2015 | -0.02 | 0    | 0.048607 | 0.00236267 | 24.64762 | -0.00237 | 61.34 |
| 300158 | 2015 | 0.037 | 0    | 0.048607 | 0.00236267 | 21.91457 | 0.027169 | 59.08 |
| 601699 | 2015 | -0.07 | 0    | 0.048607 | 0.00236267 | 24.64762 | -0.00237 | 61.34 |
| 2487   | 2015 | -0.24 | 0.01 | 0.172663 | 0.02981265 | 21.44746 | 0.056427 | 47.41 |
| 2487   | 2015 | 0.2   | 0.01 | 0.172663 | 0.02981265 | 21.6051  | 0.056427 | 47.41 |
| 2487   | 2015 | -0.24 | 0.01 | 0.172663 | 0.02981265 | 21.44746 | 0.056427 | 47.41 |
| 2487   | 2015 | 0.2   | 0.01 | 0.172663 | 0.02981265 | 21.44746 | 0.056427 | 47.41 |
| 2487   | 2015 | -0.05 | 0.01 | 0.172663 | 0.02981265 | 21.44746 | 0.056427 | 47.41 |
| 600328 | 2015 | -0.98 | 0.01 | 0.693147 | 0.48045301 | 21.89117 | -0.05828 | 40.14 |
| 600328 | 2015 | -0.79 | 0.01 | 0.693147 | 0.48045301 | 22.62585 | -0.05828 | 40.14 |
| 600328 | 2015 | -0.79 | 0.01 | 0.693147 | 0.48045301 | 22.62585 | -0.05828 | 40.14 |
| 600328 | 2015 | -0.81 | 0.01 | 0.693147 | 0.48045301 | 22.62585 | -0.05828 | 40.14 |
| 600328 | 2015 | -0.98 | 0.01 | 0.693147 | 0.48045301 | 22.62585 | -0.05828 | 40.14 |
| 2497   | 2015 | -0.57 | 0.04 | 0.2039   | 0.04157503 | 21.78567 | 0.053379 | 14.7  |
| 2497   | 2015 | -0.29 | 0.04 | 0.2039   | 0.04157503 | 21.78567 | 0.053379 | 14.7  |
| 2497   | 2015 | -0.24 | 0.04 | 0.2039   | 0.04157503 | 21.78567 | 0.053379 | 14.7  |
| 2497   | 2015 | -0.57 | 0.04 | 0.2039   | 0.04157503 | 21.78567 | 0.053379 | 14.7  |
| 2497   | 2015 | -0.57 | 0.04 | 0.2039   | 0.04157503 | 21.63928 | 0.053379 | 14.7  |
| 2497   | 2015 | -0.27 | 0.04 | 0.2039   | 0.04157503 | 21.78567 | 0.053379 | 14.7  |
| 2497   | 2015 | -0.32 | 0.04 | 0.2039   | 0.04157503 | 21.78567 | 0.053379 | 14.7  |
| 2497   | 2015 | -0.57 | 0.04 | 0.2039   | 0.04157503 | 21.78567 | 0.053379 | 14.7  |
| 2497   | 2015 | -0.24 | 0.04 | 0.2039   | 0.04157503 | 21.78567 | 0.053379 | 14.7  |
| 2497   | 2015 | -0.57 | 0.04 | 0.2039   | 0.04157503 | 21.78567 | 0.053379 | 14.7  |
| 2497   | 2015 | -0.22 | 0.04 | 0.2039   | 0.04157503 | 21.78567 | 0.053379 | 14.7  |
| 2497   | 2015 | -0.44 | 0.04 | 0.2039   | 0.04157503 | 21.78567 | 0.053379 | 14.7  |
| 2497   | 2015 | -0.35 | 0.04 | 0.2039   | 0.04157503 | 21.78567 | 0.053379 | 14.7  |
| 2497   | 2015 | -0.57 | 0.04 | 0.2039   | 0.04157503 | 21.78567 | 0.053379 | 14.7  |
| 2497   | 2015 | -0.57 | 0.04 | 0.2039   | 0.04157503 | 21.78567 | 0.053379 | 14.7  |
| 2497   | 2015 | -0.36 | 0.04 | 0.2039   | 0.04157503 | 21.78567 | 0.053379 | 14.7  |
| 600336 | 2015 | -0.72 | 0.05 | 0.283059 | 0.08012263 | 21.7632  | 0.011861 | 37.98 |
| 2073   | 2015 | 0.25  | 0.05 | 0.283059 | 0.08012263 | 22.81027 | 0.044167 | 17.68 |
| 2537   | 2015 | -0.7  | 0.05 | 0.283059 | 0.08012263 | 21.74094 | 0.052652 | 36.48 |
| 2498   | 2015 | -0.38 | 0.05 | 0.283059 | 0.08012263 | 22.55021 | 0.084362 | 69.7  |
| 600600 | 2015 | -0.99 | 0.05 | 0.283059 | 0.08012263 | 23.6342  | 0.099718 | 30.83 |
| 300001 | 2015 | -0.35 | 0.05 | 0.283059 | 0.08012263 | 22.57991 | 0.051001 | 43.8  |
| 600060 | 2015 | 0.446 | 0.05 | 0.283059 | 0.08012263 | 23.76403 | 0.125672 | 39.35 |
| 2073   | 2015 | 0.412 | 0.05 | 0.283059 | 0.08012263 | 22.81027 | 0.044167 | 17.68 |
| 600690 | 2015 | -0.17 | 0.05 | 0.283059 | 0.08012263 | 25.05348 | 0.182768 | 20.56 |
| 2073   | 2015 | -0.12 | 0.05 | 0.283059 | 0.08012263 | 22.81027 | 0.044167 | 17.68 |
| 300208 | 2015 | -0.63 | 0.05 | 0.283059 | 0.08012263 | 21.48255 | 0.292524 | 14.57 |
| 2545   | 2015 | -0.52 | 0.05 | 0.283059 | 0.08012263 | 22.12491 | 0.023308 | 52.45 |
| 300001 | 2015 | -0.3  | 0.05 | 0.283059 | 0.08012263 | 22.57991 | 0.051001 | 43.8  |
| 2073   | 2015 | 0.279 | 0.05 | 0.283059 | 0.08012263 | 22.81027 | 0.044167 | 17.68 |
| 300001 | 2015 | -0.62 | 0.05 | 0.283059 | 0.08012263 | 22.57991 | 0.051001 | 43.8  |
| 601058 | 2015 | -0.58 | 0.05 | 0.283059 | 0.08012263 | 23.28803 | 0.045059 | 7.84  |
| 2094   | 2015 | -0.71 | 0.05 | 0.283059 | 0.08012263 | 21.37454 | 0.140681 | 27.03 |
| 599    | 2015 | -0.1  | 0.05 | 0.283059 | 0.08012263 | 22.01991 | 0.022815 | 23.38 |

|        |      |       |      |          |            |          |          |       |
|--------|------|-------|------|----------|------------|----------|----------|-------|
| 600579 | 2015 | 0.76  | 0.05 | 0.283059 | 0.08012263 | 20.25844 | 0.050519 | 59.4  |
| 2537   | 2015 | -0.82 | 0.05 | 0.283059 | 0.08012263 | 21.74094 | 0.052652 | 36.48 |
| 2537   | 2015 | -0.7  | 0.05 | 0.283059 | 0.08012263 | 21.74094 | 0.052652 | 36.48 |
| 2537   | 2015 | -0.7  | 0.05 | 0.283059 | 0.08012263 | 21.74094 | 0.052652 | 36.48 |
| 300208 | 2015 | -0.63 | 0.05 | 0.283059 | 0.08012263 | 21.53357 | 0.292524 | 14.57 |
| 2094   | 2015 | -0.71 | 0.05 | 0.283059 | 0.08012263 | 21.37454 | 0.140681 | 27.03 |
| 600336 | 2015 | 0.262 | 0.05 | 0.283059 | 0.08012263 | 21.7632  | 0.011861 | 37.98 |
| 600060 | 2015 | 0.033 | 0.05 | 0.283059 | 0.08012263 | 23.76403 | 0.125672 | 39.35 |
| 300183 | 2015 | 1.416 | 0.05 | 0.283059 | 0.08012263 | 21.62704 | 0.120381 | 23.06 |
| 600060 | 2015 | 0.488 | 0.05 | 0.283059 | 0.08012263 | 23.76403 | 0.125672 | 39.35 |
| 599    | 2015 | -0.16 | 0.05 | 0.283059 | 0.08012263 | 22.49902 | 0.022815 | 23.38 |
| 2545   | 2015 | -0.52 | 0.05 | 0.283059 | 0.08012263 | 22.06511 | 0.023308 | 52.45 |
| 599    | 2015 | -0.43 | 0.05 | 0.283059 | 0.08012263 | 22.49902 | 0.022815 | 23.38 |
| 600600 | 2015 | -0.99 | 0.05 | 0.283059 | 0.08012263 | 24.07319 | 0.099718 | 30.83 |
| 600690 | 2015 | -0.01 | 0.05 | 0.283059 | 0.08012263 | 25.05348 | 0.182768 | 20.56 |
| 2073   | 2015 | -0.12 | 0.05 | 0.283059 | 0.08012263 | 22.81027 | 0.044167 | 17.68 |
| 600690 | 2015 | -0.08 | 0.05 | 0.283059 | 0.08012263 | 25.05348 | 0.182768 | 20.56 |
| 599    | 2015 | -0.2  | 0.05 | 0.283059 | 0.08012263 | 22.49902 | 0.022815 | 23.38 |
| 600690 | 2015 | -0.03 | 0.05 | 0.283059 | 0.08012263 | 25.05348 | 0.182768 | 20.56 |
| 300183 | 2015 | 1.857 | 0.05 | 0.283059 | 0.08012263 | 21.62704 | 0.120381 | 23.06 |
| 600690 | 2015 | -0.6  | 0.05 | 0.283059 | 0.08012263 | 25.05348 | 0.182768 | 20.56 |
| 600060 | 2015 | 0.337 | 0.05 | 0.283059 | 0.08012263 | 23.68103 | 0.125672 | 39.35 |
| 300110 | 2015 | 0.013 | 0.05 | 0.283059 | 0.08012263 | 21.73442 | 0.015401 | 42.12 |
| 300110 | 2015 | -0.55 | 0.05 | 0.283059 | 0.08012263 | 21.73442 | 0.015401 | 42.12 |
| 600690 | 2015 | 0.133 | 0.05 | 0.283059 | 0.08012263 | 25.05348 | 0.182768 | 20.56 |
| 600060 | 2015 | -0.01 | 0.05 | 0.283059 | 0.08012263 | 23.76403 | 0.125672 | 39.35 |
| 300001 | 2015 | -0.42 | 0.05 | 0.283059 | 0.08012263 | 22.57991 | 0.051001 | 43.8  |
| 2537   | 2015 | -0.7  | 0.05 | 0.283059 | 0.08012263 | 21.74094 | 0.052652 | 36.48 |
| 300208 | 2015 | -0.63 | 0.05 | 0.283059 | 0.08012263 | 21.48255 | 0.292524 | 14.57 |
| 600690 | 2015 | -0.17 | 0.05 | 0.283059 | 0.08012263 | 25.05348 | 0.182768 | 20.56 |
| 600600 | 2015 | -0.99 | 0.05 | 0.283059 | 0.08012263 | 24.07319 | 0.099718 | 30.83 |
| 600579 | 2015 | 0.697 | 0.05 | 0.283059 | 0.08012263 | 21.06045 | 0.050519 | 59.4  |
| 600690 | 2015 | -0.27 | 0.05 | 0.283059 | 0.08012263 | 25.05348 | 0.182768 | 20.56 |
| 300001 | 2015 | -0.42 | 0.05 | 0.283059 | 0.08012263 | 22.57991 | 0.051001 | 43.8  |
| 300001 | 2015 | -0.39 | 0.05 | 0.283059 | 0.08012263 | 22.57991 | 0.051001 | 43.8  |
| 600690 | 2015 | 0.23  | 0.05 | 0.283059 | 0.08012263 | 25.05348 | 0.182768 | 20.56 |
| 600336 | 2015 | -0.28 | 0.05 | 0.283059 | 0.08012263 | 21.7632  | 0.011861 | 37.98 |
| 600060 | 2015 | 0.451 | 0.05 | 0.283059 | 0.08012263 | 23.76403 | 0.125672 | 39.35 |
| 600336 | 2015 | -0.42 | 0.05 | 0.283059 | 0.08012263 | 21.7632  | 0.011861 | 37.98 |
| 300110 | 2015 | -0.33 | 0.05 | 0.283059 | 0.08012263 | 21.73442 | 0.015401 | 42.12 |
| 300001 | 2015 | -0.38 | 0.05 | 0.283059 | 0.08012263 | 22.29419 | 0.051001 | 43.8  |
| 2537   | 2015 | -0.82 | 0.05 | 0.283059 | 0.08012263 | 21.74094 | 0.052652 | 36.48 |
| 600690 | 2015 | -0.11 | 0.05 | 0.283059 | 0.08012263 | 25.05348 | 0.182768 | 20.56 |
| 599    | 2015 | -0.37 | 0.05 | 0.283059 | 0.08012263 | 22.49902 | 0.022815 | 23.38 |
| 599    | 2015 | -0.16 | 0.05 | 0.283059 | 0.08012263 | 22.49902 | 0.022815 | 23.38 |
| 600690 | 2015 | -0.6  | 0.05 | 0.283059 | 0.08012263 | 25.05348 | 0.182768 | 20.56 |
| 600336 | 2015 | -0.72 | 0.05 | 0.283059 | 0.08012263 | 21.7632  | 0.011861 | 37.98 |
| 600336 | 2015 | -0.64 | 0.05 | 0.283059 | 0.08012263 | 21.7632  | 0.011861 | 37.98 |
| 600600 | 2015 | -0.63 | 0.05 | 0.283059 | 0.08012263 | 24.07319 | 0.099718 | 30.83 |
| 2537   | 2015 | -0.7  | 0.05 | 0.283059 | 0.08012263 | 21.74094 | 0.052652 | 36.48 |
| 600600 | 2015 | -0.74 | 0.05 | 0.283059 | 0.08012263 | 24.07319 | 0.099718 | 30.83 |
| 600600 | 2015 | -0.63 | 0.05 | 0.283059 | 0.08012263 | 24.07319 | 0.099718 | 30.83 |
| 601058 | 2015 | -0.47 | 0.05 | 0.283059 | 0.08012263 | 23.28803 | 0.045059 | 7.84  |
| 300208 | 2015 | -0.63 | 0.05 | 0.283059 | 0.08012263 | 21.48255 | 0.292524 | 14.57 |

|        |      |       |      |          |            |          |          |       |
|--------|------|-------|------|----------|------------|----------|----------|-------|
| 300110 | 2015 | -0.36 | 0.05 | 0.283059 | 0.08012263 | 21.66303 | 0.015401 | 42.12 |
| 2094   | 2015 | -0.71 | 0.05 | 0.283059 | 0.08012263 | 21.24224 | 0.140681 | 27.03 |
| 600579 | 2015 | 0.697 | 0.05 | 0.283059 | 0.08012263 | 21.06045 | 0.050519 | 59.4  |
| 600060 | 2015 | 0.446 | 0.05 | 0.283059 | 0.08012263 | 23.76403 | 0.125672 | 39.35 |
| 600690 | 2015 | 0.179 | 0.05 | 0.283059 | 0.08012263 | 25.05348 | 0.182768 | 20.56 |
| 300001 | 2015 | -0.26 | 0.05 | 0.283059 | 0.08012263 | 22.57991 | 0.051001 | 43.8  |
| 601058 | 2015 | -0.47 | 0.05 | 0.283059 | 0.08012263 | 23.28803 | 0.045059 | 7.84  |
| 2545   | 2015 | -0.52 | 0.05 | 0.283059 | 0.08012263 | 22.12491 | 0.023308 | 52.45 |
| 600336 | 2015 | -0.39 | 0.05 | 0.283059 | 0.08012263 | 21.7632  | 0.011861 | 37.98 |
| 600579 | 2015 | 0.358 | 0.05 | 0.283059 | 0.08012263 | 21.06045 | 0.050519 | 59.4  |
| 600690 | 2015 | -0.17 | 0.05 | 0.283059 | 0.08012263 | 25.05348 | 0.182768 | 20.56 |
| 300110 | 2015 | -0.07 | 0.05 | 0.283059 | 0.08012263 | 21.73442 | 0.015401 | 42.12 |
| 300183 | 2015 | 1.333 | 0.05 | 0.283059 | 0.08012263 | 21.62704 | 0.120381 | 23.06 |
| 2094   | 2015 | -0.71 | 0.05 | 0.283059 | 0.08012263 | 21.37454 | 0.140681 | 27.03 |
| 600690 | 2015 | 0.702 | 0.05 | 0.283059 | 0.08012263 | 25.05348 | 0.182768 | 20.56 |
| 600690 | 2015 | -0.17 | 0.05 | 0.283059 | 0.08012263 | 25.05348 | 0.182768 | 20.56 |
| 600690 | 2015 | -0.6  | 0.05 | 0.283059 | 0.08012263 | 25.05348 | 0.182768 | 20.56 |
| 600690 | 2015 | 0.355 | 0.05 | 0.283059 | 0.08012263 | 25.05348 | 0.182768 | 20.56 |
| 600690 | 2015 | 0.253 | 0.05 | 0.283059 | 0.08012263 | 25.05348 | 0.182768 | 20.56 |
| 600690 | 2015 | -0.6  | 0.05 | 0.283059 | 0.08012263 | 25.05348 | 0.182768 | 20.56 |
| 300183 | 2015 | 1.158 | 0.05 | 0.283059 | 0.08012263 | 21.62704 | 0.120381 | 23.06 |
| 600690 | 2015 | -0.09 | 0.05 | 0.283059 | 0.08012263 | 25.05348 | 0.182768 | 20.56 |
| 600690 | 2015 | -0.36 | 0.05 | 0.283059 | 0.08012263 | 25.05348 | 0.182768 | 20.56 |
| 300110 | 2015 | -0.17 | 0.05 | 0.283059 | 0.08012263 | 21.73442 | 0.015401 | 42.12 |
| 600690 | 2015 | 0.104 | 0.05 | 0.283059 | 0.08012263 | 25.05348 | 0.182768 | 20.56 |
| 300110 | 2015 | -0.55 | 0.05 | 0.283059 | 0.08012263 | 21.73442 | 0.015401 | 42.12 |
| 600336 | 2015 | -0.37 | 0.05 | 0.283059 | 0.08012263 | 21.80615 | 0.011861 | 37.98 |
| 600336 | 2015 | -0.72 | 0.05 | 0.283059 | 0.08012263 | 21.7632  | 0.011861 | 37.98 |
| 600060 | 2015 | 0.446 | 0.05 | 0.283059 | 0.08012263 | 23.76403 | 0.125672 | 39.35 |
| 2073   | 2015 | 0.297 | 0.05 | 0.283059 | 0.08012263 | 22.81027 | 0.044167 | 17.68 |
| 2498   | 2015 | -0.18 | 0.05 | 0.283059 | 0.08012263 | 22.55021 | 0.084362 | 69.7  |
| 2537   | 2015 | -0.7  | 0.05 | 0.283059 | 0.08012263 | 21.74094 | 0.052652 | 36.48 |
| 600060 | 2015 | 0.033 | 0.05 | 0.283059 | 0.08012263 | 23.76403 | 0.125672 | 39.35 |
| 600690 | 2015 | -0.6  | 0.05 | 0.283059 | 0.08012263 | 25.05348 | 0.182768 | 20.56 |
| 600690 | 2015 | 0.018 | 0.05 | 0.283059 | 0.08012263 | 25.05348 | 0.182768 | 20.56 |
| 300208 | 2015 | -0.63 | 0.05 | 0.283059 | 0.08012263 | 21.48255 | 0.292524 | 14.57 |
| 600690 | 2015 | -0.05 | 0.05 | 0.283059 | 0.08012263 | 25.05348 | 0.182768 | 20.56 |
| 300001 | 2015 | -0.49 | 0.05 | 0.283059 | 0.08012263 | 22.57991 | 0.051001 | 43.8  |
| 600690 | 2015 | -0.27 | 0.05 | 0.283059 | 0.08012263 | 25.05348 | 0.182768 | 20.56 |
| 600690 | 2015 | -0.05 | 0.05 | 0.283059 | 0.08012263 | 23.5058  | 0.182768 | 20.56 |
| 300110 | 2015 | -0.07 | 0.05 | 0.283059 | 0.08012263 | 21.73442 | 0.015401 | 42.12 |
| 2537   | 2015 | -0.29 | 0.05 | 0.283059 | 0.08012263 | 21.74094 | 0.052652 | 36.48 |
| 600579 | 2015 | 0.697 | 0.05 | 0.283059 | 0.08012263 | 21.06045 | 0.050519 | 59.4  |
| 600690 | 2015 | -0.05 | 0.05 | 0.283059 | 0.08012263 | 25.05348 | 0.182768 | 20.56 |
| 2498   | 2015 | -0.63 | 0.05 | 0.283059 | 0.08012263 | 22.55021 | 0.084362 | 69.7  |
| 2073   | 2015 | 0.273 | 0.05 | 0.283059 | 0.08012263 | 22.81027 | 0.044167 | 17.68 |
| 600060 | 2015 | 0.013 | 0.05 | 0.283059 | 0.08012263 | 23.76403 | 0.125672 | 39.35 |
| 600690 | 2015 | -0.17 | 0.05 | 0.283059 | 0.08012263 | 25.05348 | 0.182768 | 20.56 |
| 600336 | 2015 | -0.19 | 0.05 | 0.283059 | 0.08012263 | 21.7632  | 0.011861 | 37.98 |
| 300183 | 2015 | 1.442 | 0.05 | 0.283059 | 0.08012263 | 21.62704 | 0.120381 | 23.06 |
| 2537   | 2015 | -0.82 | 0.05 | 0.283059 | 0.08012263 | 21.74094 | 0.052652 | 36.48 |
| 600060 | 2015 | 0.446 | 0.05 | 0.283059 | 0.08012263 | 23.76403 | 0.125672 | 39.35 |
| 2545   | 2015 | -0.52 | 0.05 | 0.283059 | 0.08012263 | 22.12491 | 0.023308 | 52.45 |
| 599    | 2015 | -0.43 | 0.05 | 0.283059 | 0.08012263 | 22.49902 | 0.022815 | 23.38 |

|        |      |       |      |          |            |          |          |       |
|--------|------|-------|------|----------|------------|----------|----------|-------|
| 600336 | 2015 | -0.27 | 0.05 | 0.283059 | 0.08012263 | 21.7632  | 0.011861 | 37.98 |
| 2498   | 2015 | -0.18 | 0.05 | 0.283059 | 0.08012263 | 22.55021 | 0.084362 | 69.7  |
| 600336 | 2015 | -0.39 | 0.05 | 0.283059 | 0.08012263 | 21.7632  | 0.011861 | 37.98 |
| 600060 | 2015 | 0.446 | 0.05 | 0.283059 | 0.08012263 | 23.76403 | 0.125672 | 39.35 |
| 300001 | 2015 | -0.41 | 0.05 | 0.283059 | 0.08012263 | 22.57991 | 0.051001 | 43.8  |
| 600060 | 2015 | 0.446 | 0.05 | 0.283059 | 0.08012263 | 23.76403 | 0.125672 | 39.35 |
| 601058 | 2015 | -0.57 | 0.05 | 0.283059 | 0.08012263 | 23.28803 | 0.045059 | 7.84  |
| 2498   | 2015 | -0.63 | 0.05 | 0.283059 | 0.08012263 | 22.52485 | 0.084362 | 69.7  |
| 2073   | 2015 | 0.231 | 0.05 | 0.283059 | 0.08012263 | 22.56703 | 0.044167 | 17.68 |
| 2073   | 2015 | -0.25 | 0.05 | 0.283059 | 0.08012263 | 22.81027 | 0.044167 | 17.68 |
| 601058 | 2015 | -0.57 | 0.05 | 0.283059 | 0.08012263 | 23.28803 | 0.045059 | 7.84  |
| 2073   | 2015 | -0.12 | 0.05 | 0.283059 | 0.08012263 | 22.81027 | 0.044167 | 17.68 |
| 2498   | 2015 | -0.63 | 0.05 | 0.283059 | 0.08012263 | 22.55021 | 0.084362 | 69.7  |
| 600690 | 2015 | -0.05 | 0.05 | 0.283059 | 0.08012263 | 25.05348 | 0.182768 | 20.56 |
| 600690 | 2015 | -0.18 | 0.05 | 0.283059 | 0.08012263 | 25.05348 | 0.182768 | 20.56 |
| 601058 | 2015 | -0.58 | 0.05 | 0.283059 | 0.08012263 | 23.28803 | 0.045059 | 7.84  |
| 2094   | 2015 | -0.71 | 0.05 | 0.283059 | 0.08012263 | 21.37454 | 0.140681 | 27.03 |
| 2537   | 2015 | -0.7  | 0.05 | 0.283059 | 0.08012263 | 21.1652  | 0.052652 | 36.48 |
| 600690 | 2015 | -0.6  | 0.05 | 0.283059 | 0.08012263 | 25.05348 | 0.182768 | 20.56 |
| 300001 | 2015 | -0.43 | 0.05 | 0.283059 | 0.08012263 | 22.57991 | 0.051001 | 43.8  |
| 2545   | 2015 | -0.52 | 0.05 | 0.283059 | 0.08012263 | 22.12491 | 0.023308 | 52.45 |
| 2498   | 2015 | -0.63 | 0.05 | 0.283059 | 0.08012263 | 22.55021 | 0.084362 | 69.7  |
| 600690 | 2015 | -0.1  | 0.05 | 0.283059 | 0.08012263 | 25.05348 | 0.182768 | 20.56 |
| 2073   | 2015 | 0.297 | 0.05 | 0.283059 | 0.08012263 | 22.81027 | 0.044167 | 17.68 |
| 601058 | 2015 | -0.57 | 0.05 | 0.283059 | 0.08012263 | 23.28803 | 0.045059 | 7.84  |
| 600690 | 2015 | 0.053 | 0.05 | 0.283059 | 0.08012263 | 25.05348 | 0.182768 | 20.56 |
| 2498   | 2015 | -0.63 | 0.05 | 0.283059 | 0.08012263 | 22.55021 | 0.084362 | 69.7  |
| 300208 | 2015 | -0.63 | 0.05 | 0.283059 | 0.08012263 | 21.48255 | 0.292524 | 14.57 |
| 600579 | 2015 | 0.697 | 0.05 | 0.283059 | 0.08012263 | 21.06045 | 0.050519 | 59.4  |
| 2545   | 2015 | -0.52 | 0.05 | 0.283059 | 0.08012263 | 22.12491 | 0.023308 | 52.45 |
| 600690 | 2015 | -0.6  | 0.05 | 0.283059 | 0.08012263 | 25.05348 | 0.182768 | 20.56 |
| 601058 | 2015 | -0.57 | 0.05 | 0.283059 | 0.08012263 | 22.84547 | 0.045059 | 7.84  |
| 600690 | 2015 | 0.61  | 0.05 | 0.283059 | 0.08012263 | 25.05348 | 0.182768 | 20.56 |
| 599    | 2015 | -0.43 | 0.05 | 0.283059 | 0.08012263 | 22.49902 | 0.022815 | 23.38 |
| 300183 | 2015 | 1.333 | 0.05 | 0.283059 | 0.08012263 | 21.61085 | 0.120381 | 23.06 |
| 300001 | 2015 | -0.47 | 0.05 | 0.283059 | 0.08012263 | 22.57991 | 0.051001 | 43.8  |
| 599    | 2015 | -0.05 | 0.05 | 0.283059 | 0.08012263 | 22.49902 | 0.022815 | 23.38 |
| 300001 | 2015 | -0.62 | 0.05 | 0.283059 | 0.08012263 | 22.57991 | 0.051001 | 43.8  |
| 600336 | 2015 | -0.37 | 0.05 | 0.283059 | 0.08012263 | 21.7632  | 0.011861 | 37.98 |
| 2545   | 2015 | -0.52 | 0.05 | 0.283059 | 0.08012263 | 22.12491 | 0.023308 | 52.45 |
| 2123   | 2015 | -0.25 | 0.01 | 0.092976 | 0.00864447 | 22.71662 | 0.021911 | 14.81 |
| 300210 | 2015 | -0.07 | 0.01 | 0.092976 | 0.00864447 | 21.2793  | 0.076223 | 43.94 |
| 2123   | 2015 | 0.118 | 0.01 | 0.092976 | 0.00864447 | 22.71662 | 0.021911 | 14.81 |
| 898    | 2015 | -0.06 | 0.01 | 0.092976 | 0.00864447 | 25.20735 | -0.10531 | 67.29 |
| 300210 | 2015 | -0.26 | 0.01 | 0.092976 | 0.00864447 | 21.2047  | 0.076223 | 43.94 |
| 2123   | 2015 | -0.43 | 0.01 | 0.092976 | 0.00864447 | 22.71662 | 0.021911 | 14.81 |
| 2123   | 2015 | 0.211 | 0.01 | 0.092976 | 0.00864447 | 22.71662 | 0.021911 | 14.81 |
| 300202 | 2015 | 0.302 | 0.01 | 0.092976 | 0.00864447 | 21.32358 | 0.163159 | 28.17 |
| 2123   | 2015 | 0.113 | 0.01 | 0.092976 | 0.00864447 | 22.71662 | 0.021911 | 14.81 |
| 2123   | 2015 | 0.118 | 0.01 | 0.092976 | 0.00864447 | 22.71662 | 0.021911 | 14.81 |
| 2667   | 2015 | 0.127 | 0.01 | 0.092976 | 0.00864447 | 20.56432 | 0.007938 | 24.86 |
| 2123   | 2015 | 0.118 | 0.01 | 0.092976 | 0.00864447 | 22.71662 | 0.021911 | 14.81 |
| 300210 | 2015 | -0.13 | 0.01 | 0.092976 | 0.00864447 | 21.2793  | 0.076223 | 43.94 |
| 300202 | 2015 | 0.283 | 0.01 | 0.092976 | 0.00864447 | 21.32358 | 0.163159 | 28.17 |

|        |      |       |      |          |            |          |          |       |
|--------|------|-------|------|----------|------------|----------|----------|-------|
| 2123   | 2015 | -0.43 | 0.01 | 0.092976 | 0.00864447 | 22.71662 | 0.021911 | 14.81 |
| 300210 | 2015 | -0.26 | 0.01 | 0.092976 | 0.00864447 | 21.2793  | 0.076223 | 43.94 |
| 2123   | 2015 | 0.118 | 0.01 | 0.092976 | 0.00864447 | 22.71662 | 0.021911 | 14.81 |
| 898    | 2015 | -0.4  | 0.01 | 0.092976 | 0.00864447 | 25.18045 | -0.10531 | 67.29 |
| 2123   | 2015 | 0.118 | 0.01 | 0.092976 | 0.00864447 | 22.71662 | 0.021911 | 14.81 |
| 300202 | 2015 | 0.293 | 0.01 | 0.092976 | 0.00864447 | 21.31569 | 0.163159 | 28.17 |
| 898    | 2015 | -0.06 | 0.01 | 0.092976 | 0.00864447 | 25.20735 | -0.10531 | 67.29 |
| 300210 | 2015 | -0.07 | 0.01 | 0.092976 | 0.00864447 | 21.2793  | 0.076223 | 43.94 |
| 898    | 2015 | -0.06 | 0.01 | 0.092976 | 0.00864447 | 25.20735 | -0.10531 | 67.29 |
| 300202 | 2015 | 0.283 | 0.01 | 0.092976 | 0.00864447 | 21.32358 | 0.163159 | 28.17 |
| 300202 | 2015 | 0.302 | 0.01 | 0.092976 | 0.00864447 | 21.32358 | 0.163159 | 28.17 |
| 2667   | 2015 | 0.127 | 0.01 | 0.092976 | 0.00864447 | 20.56212 | 0.007938 | 24.86 |
| 898    | 2015 | -0.06 | 0.01 | 0.092976 | 0.00864447 | 25.20735 | -0.10531 | 67.29 |
| 2123   | 2015 | 0.008 | 0.01 | 0.092976 | 0.00864447 | 22.71662 | 0.021911 | 14.81 |
| 898    | 2015 | -0.06 | 0.01 | 0.092976 | 0.00864447 | 25.20735 | -0.10531 | 67.29 |
| 2667   | 2015 | 0.127 | 0.01 | 0.092976 | 0.00864447 | 20.56212 | 0.007938 | 24.86 |
| 2123   | 2015 | 0.118 | 0.01 | 0.092976 | 0.00864447 | 22.71662 | 0.021911 | 14.81 |
| 898    | 2015 | -0.4  | 0.01 | 0.092976 | 0.00864447 | 25.20735 | -0.10531 | 67.29 |
| 2123   | 2015 | 0.118 | 0.01 | 0.092976 | 0.00864447 | 22.71662 | 0.021911 | 14.81 |
| 300202 | 2015 | 0.283 | 0.01 | 0.092976 | 0.00864447 | 21.32358 | 0.163159 | 28.17 |
| 2123   | 2015 | 0.118 | 0.01 | 0.092976 | 0.00864447 | 22.71662 | 0.021911 | 14.81 |
| 2123   | 2015 | 0.898 | 0.01 | 0.092976 | 0.00864447 | 22.63305 | 0.021911 | 14.81 |
| 898    | 2015 | -0.06 | 0.01 | 0.092976 | 0.00864447 | 25.20735 | -0.10531 | 67.29 |
| 2123   | 2015 | 0.118 | 0.01 | 0.092976 | 0.00864447 | 22.71662 | 0.021911 | 14.81 |
| 2123   | 2015 | -0.12 | 0.01 | 0.092976 | 0.00864447 | 22.71662 | 0.021911 | 14.81 |
| 2123   | 2015 | 0.235 | 0.01 | 0.092976 | 0.00864447 | 22.71662 | 0.021911 | 14.81 |
| 2123   | 2015 | 0.051 | 0.01 | 0.092976 | 0.00864447 | 22.71662 | 0.021911 | 14.81 |
| 600673 | 2015 | 0.286 | 0.09 | 0.693147 | 0.48045301 | 23.11465 | 0.019298 | 30.59 |
| 600673 | 2015 | 0.454 | 0.09 | 0.693147 | 0.48045301 | 23.11465 | 0.019298 | 30.59 |
| 600673 | 2015 | 0.192 | 0.09 | 0.693147 | 0.48045301 | 23.11465 | 0.019298 | 30.59 |
| 600673 | 2015 | 0.286 | 0.09 | 0.693147 | 0.48045301 | 23.11465 | 0.019298 | 30.59 |
| 601    | 2015 | -0.9  | 0.09 | 0.693147 | 0.48045301 | 22.86423 | 0.071832 | 15    |
| 601    | 2015 | -0.71 | 0.09 | 0.693147 | 0.48045301 | 22.4828  | 0.071832 | 15    |
| 601    | 2015 | -0.78 | 0.09 | 0.693147 | 0.48045301 | 22.86423 | 0.071832 | 15    |
| 600673 | 2015 | 0.286 | 0.09 | 0.693147 | 0.48045301 | 23.11465 | 0.019298 | 30.59 |
| 600673 | 2015 | 0.286 | 0.09 | 0.693147 | 0.48045301 | 23.11465 | 0.019298 | 30.59 |
| 601    | 2015 | -0.78 | 0.09 | 0.693147 | 0.48045301 | 22.86423 | 0.071832 | 15    |
| 600673 | 2015 | 0.286 | 0.09 | 0.693147 | 0.48045301 | 23.11465 | 0.019298 | 30.59 |
| 717    | 2015 | -0.29 | 0.09 | 0.693147 | 0.48045301 | 23.53028 | -0.4336  | 53.37 |
| 717    | 2015 | -0.29 | 0.09 | 0.693147 | 0.48045301 | 23.53028 | -0.4336  | 53.37 |
| 600673 | 2015 | 0.286 | 0.09 | 0.693147 | 0.48045301 | 23.11465 | 0.019298 | 30.59 |
| 600673 | 2015 | 0.192 | 0.09 | 0.693147 | 0.48045301 | 23.11465 | 0.019298 | 30.59 |
| 600673 | 2015 | -0.45 | 0.09 | 0.693147 | 0.48045301 | 23.11465 | 0.019298 | 30.59 |
| 717    | 2015 | -0.29 | 0.09 | 0.693147 | 0.48045301 | 23.53127 | -0.4336  | 53.37 |
| 600673 | 2015 | 0.286 | 0.09 | 0.693147 | 0.48045301 | 22.77667 | 0.019298 | 30.59 |
| 600673 | 2015 | 0.286 | 0.09 | 0.693147 | 0.48045301 | 23.11465 | 0.019298 | 30.59 |
| 600673 | 2015 | 0.286 | 0.09 | 0.693147 | 0.48045301 | 23.11465 | 0.019298 | 30.59 |
| 600673 | 2015 | 0.286 | 0.09 | 0.693147 | 0.48045301 | 23.11465 | 0.019298 | 30.59 |
| 600375 | 2015 | 0.355 | 0.09 | 1.205946 | 1.4543049  | 22.89576 | -0.35144 | 10.89 |
| 600567 | 2015 | -0.68 | 0.09 | 1.205946 | 1.4543049  | 23.63635 | 0.033607 | 33.9  |
| 600808 | 2015 | -0.77 | 0.09 | 1.205946 | 1.4543049  | 24.8577  | -0.2461  | 45.54 |
| 600375 | 2015 | -0.02 | 0.09 | 1.205946 | 1.4543049  | 22.89576 | -0.35144 | 10.89 |
| 2347   | 2015 | -0.29 | 0.09 | 1.205946 | 1.4543049  | 21.27185 | 0.009591 | 31.24 |
| 2147   | 2015 | 0.225 | 0.09 | 1.205946 | 1.4543049  | 20.91238 | -0.00368 | 16.28 |

|        |      |       |      |          |            |          |          |       |
|--------|------|-------|------|----------|------------|----------|----------|-------|
| 600808 | 2015 | -0.3  | 0.09 | 1.205946 | 1.4543049  | 24.70627 | -0.2461  | 45.54 |
| 600808 | 2015 | -0.31 | 0.09 | 1.205946 | 1.4543049  | 24.8577  | -0.2461  | 45.54 |
| 600567 | 2015 | -0.68 | 0.09 | 1.205946 | 1.4543049  | 23.63635 | 0.033607 | 33.9  |
| 600808 | 2015 | -0.41 | 0.09 | 1.205946 | 1.4543049  | 24.8577  | -0.2461  | 45.54 |
| 2347   | 2015 | -0.35 | 0.09 | 1.205946 | 1.4543049  | 21.29622 | 0.009591 | 31.24 |
| 600808 | 2015 | -0.17 | 0.09 | 1.205946 | 1.4543049  | 24.8577  | -0.2461  | 45.54 |
| 2057   | 2015 | -0.09 | 0.09 | 1.205946 | 1.4543049  | 20.21687 | 0.031842 | 25.94 |
| 600567 | 2015 | -0.79 | 0.09 | 1.205946 | 1.4543049  | 23.63635 | 0.033607 | 33.9  |
| 600375 | 2015 | -0.32 | 0.09 | 1.205946 | 1.4543049  | 22.89576 | -0.35144 | 10.89 |
| 600375 | 2015 | -0.02 | 0.09 | 1.205946 | 1.4543049  | 22.89576 | -0.35144 | 10.89 |
| 600375 | 2015 | 0.154 | 0.09 | 1.205946 | 1.4543049  | 22.89576 | -0.35144 | 10.89 |
| 600375 | 2015 | -0.1  | 0.09 | 1.205946 | 1.4543049  | 22.89576 | -0.35144 | 10.89 |
| 600567 | 2015 | -0.79 | 0.09 | 1.205946 | 1.4543049  | 23.63635 | 0.033607 | 33.9  |
| 600375 | 2015 | 0.154 | 0.09 | 1.205946 | 1.4543049  | 22.57519 | -0.35144 | 10.89 |
| 2147   | 2015 | -0.61 | 0.09 | 1.205946 | 1.4543049  | 20.91238 | -0.00368 | 16.28 |
| 600375 | 2015 | -0.02 | 0.09 | 1.205946 | 1.4543049  | 22.89576 | -0.35144 | 10.89 |
| 2057   | 2015 | -0.09 | 0.09 | 1.205946 | 1.4543049  | 20.21687 | 0.031842 | 25.94 |
| 600808 | 2015 | -0.17 | 0.09 | 1.205946 | 1.4543049  | 24.8577  | -0.2461  | 45.54 |
| 2347   | 2015 | -0.35 | 0.09 | 1.205946 | 1.4543049  | 21.27185 | 0.009591 | 31.24 |
| 600375 | 2015 | -0.51 | 0.09 | 1.205946 | 1.4543049  | 22.89576 | -0.35144 | 10.89 |
| 2147   | 2015 | -0.61 | 0.09 | 1.205946 | 1.4543049  | 20.91238 | -0.00368 | 16.28 |
| 600567 | 2015 | -0.66 | 0.09 | 1.205946 | 1.4543049  | 23.63635 | 0.033607 | 33.9  |
| 2147   | 2015 | -0.61 | 0.09 | 1.205946 | 1.4543049  | 20.83032 | -0.00368 | 16.28 |
| 600375 | 2015 | -0.07 | 0.09 | 1.205946 | 1.4543049  | 22.89576 | -0.35144 | 10.89 |
| 600567 | 2015 | -0.57 | 0.09 | 1.205946 | 1.4543049  | 23.3513  | 0.033607 | 33.9  |
| 600375 | 2015 | 0.087 | 0.09 | 1.205946 | 1.4543049  | 22.89576 | -0.35144 | 10.89 |
| 2057   | 2015 | 0.376 | 0.09 | 1.205946 | 1.4543049  | 20.20538 | 0.031842 | 25.94 |
| 2347   | 2015 | -0.29 | 0.09 | 1.205946 | 1.4543049  | 21.27185 | 0.009591 | 31.24 |
| 2147   | 2015 | 0.016 | 0.09 | 1.205946 | 1.4543049  | 20.91238 | -0.00368 | 16.28 |
| 2147   | 2015 | 0.173 | 0.09 | 1.205946 | 1.4543049  | 20.91238 | -0.00368 | 16.28 |
| 2147   | 2015 | 0.016 | 0.09 | 1.205946 | 1.4543049  | 20.91238 | -0.00368 | 16.28 |
| 2057   | 2015 | -0.03 | 0.09 | 1.205946 | 1.4543049  | 20.21687 | 0.031842 | 25.94 |
| 2347   | 2015 | -0.35 | 0.09 | 1.205946 | 1.4543049  | 21.27185 | 0.009591 | 31.24 |
| 2057   | 2015 | 0.376 | 0.09 | 1.205946 | 1.4543049  | 20.21687 | 0.031842 | 25.94 |
| 600375 | 2015 | -0.02 | 0.09 | 1.205946 | 1.4543049  | 22.89576 | -0.35144 | 10.89 |
| 2347   | 2015 | -0.29 | 0.09 | 1.205946 | 1.4543049  | 21.27185 | 0.009591 | 31.24 |
| 2147   | 2015 | 0.016 | 0.09 | 1.205946 | 1.4543049  | 20.91238 | -0.00368 | 16.28 |
| 600808 | 2015 | -0.3  | 0.09 | 1.205946 | 1.4543049  | 24.8577  | -0.2461  | 45.54 |
| 2147   | 2015 | 0.016 | 0.09 | 1.205946 | 1.4543049  | 20.91238 | -0.00368 | 16.28 |
| 2347   | 2015 | -0.29 | 0.09 | 1.205946 | 1.4543049  | 21.27185 | 0.009591 | 31.24 |
| 2147   | 2015 | 0.016 | 0.09 | 1.205946 | 1.4543049  | 20.91238 | -0.00368 | 16.28 |
| 2347   | 2015 | -0.29 | 0.09 | 1.205946 | 1.4543049  | 21.27185 | 0.009591 | 31.24 |
| 600375 | 2015 | -0.02 | 0.09 | 1.205946 | 1.4543049  | 22.89576 | -0.35144 | 10.89 |
| 600808 | 2015 | -0.54 | 0.09 | 1.205946 | 1.4543049  | 24.8577  | -0.2461  | 45.54 |
| 300066 | 2015 | -0.46 | 0.08 | 0.932605 | 0.86975195 | 21.19425 | 0.100397 | 40.84 |
| 600362 | 2015 | -0.33 | 0.08 | 0.932605 | 0.86975195 | 24.90587 | 0.014315 | 40.53 |
| 600362 | 2015 | -0.72 | 0.08 | 0.932605 | 0.86975195 | 24.90587 | 0.014315 | 40.53 |
| 600362 | 2015 | -0.69 | 0.08 | 0.932605 | 0.86975195 | 24.90587 | 0.014315 | 40.53 |
| 300066 | 2015 | -0.01 | 0.08 | 0.932605 | 0.86975195 | 21.19425 | 0.100397 | 40.84 |
| 600362 | 2015 | -0.9  | 0.08 | 0.932605 | 0.86975195 | 24.90587 | 0.014315 | 40.53 |
| 600362 | 2015 | -0.13 | 0.08 | 0.932605 | 0.86975195 | 24.90587 | 0.014315 | 40.53 |
| 300066 | 2015 | -0.35 | 0.08 | 0.932605 | 0.86975195 | 21.19425 | 0.100397 | 40.84 |
| 600362 | 2015 | -0.72 | 0.08 | 0.932605 | 0.86975195 | 24.90587 | 0.014315 | 40.53 |
| 300066 | 2015 | -0.13 | 0.08 | 0.932605 | 0.86975195 | 21.19425 | 0.100397 | 40.84 |



|        |      |       |      |          |            |          |          |       |
|--------|------|-------|------|----------|------------|----------|----------|-------|
| 600362 | 2015 | 0.42  | 0.08 | 0.932605 | 0.86975195 | 25.22035 | 0.014315 | 40.53 |
| 300066 | 2015 | -0.46 | 0.08 | 0.932605 | 0.86975195 | 21.08142 | 0.100397 | 40.84 |
| 300066 | 2015 | -0.16 | 0.08 | 0.932605 | 0.86975195 | 21.19425 | 0.100397 | 40.84 |
| 952    | 2015 | -0.67 | 0.12 | 0.048607 | 0.00236267 | 21.24268 | 0.035838 | 15.11 |
| 952    | 2015 | -0.67 | 0.12 | 0.048607 | 0.00236267 | 21.20614 | 0.035838 | 15.11 |
| 952    | 2015 | -0.6  | 0.12 | 0.048607 | 0.00236267 | 21.20614 | 0.035838 | 15.11 |
| 952    | 2015 | -0.6  | 0.12 | 0.048607 | 0.00236267 | 21.20614 | 0.035838 | 15.11 |
| 952    | 2015 | -0.04 | 0.12 | 0.048607 | 0.00236267 | 21.20614 | 0.035838 | 15.11 |
| 952    | 2015 | -0.6  | 0.12 | 0.048607 | 0.00236267 | 21.20614 | 0.035838 | 15.11 |
| 952    | 2015 | -0.04 | 0.12 | 0.048607 | 0.00236267 | 21.20614 | 0.035838 | 15.11 |
| 2014   | 2015 | -0.22 | 0.09 | 0.847298 | 0.71791342 | 21.4548  | 0.111648 | 28.46 |
| 2014   | 2015 | -0.25 | 0.09 | 0.847298 | 0.71791342 | 21.4548  | 0.111648 | 28.46 |
| 2014   | 2015 | -0.28 | 0.09 | 0.847298 | 0.71791342 | 21.4548  | 0.111648 | 28.46 |
| 2014   | 2015 | -0.16 | 0.09 | 0.847298 | 0.71791342 | 21.4548  | 0.111648 | 28.46 |
| 2014   | 2015 | -0.16 | 0.09 | 0.847298 | 0.71791342 | 21.4548  | 0.111648 | 28.46 |
| 2014   | 2015 | -0.55 | 0.09 | 0.847298 | 0.71791342 | 21.4548  | 0.111648 | 28.46 |
| 2014   | 2015 | -0.22 | 0.09 | 0.847298 | 0.71791342 | 21.31981 | 0.111648 | 28.46 |
| 708    | 2015 | 0.021 | 0.12 | 1.527466 | 2.3331509  | 22.35984 | 0.077299 | 29.95 |
| 708    | 2015 | 0.021 | 0.12 | 1.527466 | 2.3331509  | 22.35984 | 0.077299 | 29.95 |
| 708    | 2015 | 0.021 | 0.12 | 1.527466 | 2.3331509  | 22.35984 | 0.077299 | 29.95 |
| 600187 | 2015 | -0.8  | 0.08 | 1.805936 | 3.2614043  | 22.12575 | -0.04412 | 15.62 |
| 600187 | 2015 | -0.8  | 0.08 | 1.805936 | 3.2614043  | 22.12575 | -0.04412 | 15.62 |
| 601106 | 2015 | -0.29 | 0.08 | 1.805936 | 3.2614043  | 24.36263 | -0.12027 | 62.11 |
| 601106 | 2015 | 0.17  | 0.08 | 1.805936 | 3.2614043  | 24.36263 | -0.12027 | 62.11 |
| 601106 | 2015 | 0.144 | 0.08 | 1.805936 | 3.2614043  | 24.25123 | -0.12027 | 62.11 |
| 601106 | 2015 | 0.26  | 0.08 | 1.805936 | 3.2614043  | 24.36263 | -0.12027 | 62.11 |
| 601106 | 2015 | 0.144 | 0.08 | 1.805936 | 3.2614043  | 24.36263 | -0.12027 | 62.11 |
| 601106 | 2015 | -0.29 | 0.08 | 1.805936 | 3.2614043  | 24.36263 | -0.12027 | 62.11 |
| 601106 | 2015 | 0.113 | 0.08 | 1.805936 | 3.2614043  | 24.36263 | -0.12027 | 62.11 |
| 601106 | 2015 | -0.29 | 0.08 | 1.805936 | 3.2614043  | 24.36263 | -0.12027 | 62.11 |
| 601106 | 2015 | 0.047 | 0.08 | 1.805936 | 3.2614043  | 24.36263 | -0.12027 | 62.11 |
| 600187 | 2015 | -0.8  | 0.08 | 1.805936 | 3.2614043  | 22.12575 | -0.04412 | 15.62 |
| 600187 | 2015 | -0.8  | 0.08 | 1.805936 | 3.2614043  | 21.95269 | -0.04412 | 15.62 |
| 601106 | 2015 | 0.13  | 0.08 | 1.805936 | 3.2614043  | 24.36263 | -0.12027 | 62.11 |
| 600187 | 2015 | -0.8  | 0.08 | 1.805936 | 3.2614043  | 22.12575 | -0.04412 | 15.62 |
| 600187 | 2015 | -0.8  | 0.08 | 1.805936 | 3.2614043  | 22.12575 | -0.04412 | 15.62 |
| 600388 | 2015 | -0.01 | 0.11 | 1.287104 | 1.6566373  | 23.32708 | 0.153118 | 17.17 |
| 601899 | 2015 | -0.51 | 0.11 | 1.287104 | 1.6566373  | 25.15306 | 0.042053 | 26.56 |
| 600388 | 2015 | -0.5  | 0.11 | 1.287104 | 1.6566373  | 23.32708 | 0.153118 | 17.17 |
| 601899 | 2015 | -0.08 | 0.11 | 1.287104 | 1.6566373  | 25.15306 | 0.042053 | 26.56 |
| 600388 | 2015 | -0.18 | 0.11 | 1.287104 | 1.6566373  | 23.32708 | 0.153118 | 17.17 |
| 600388 | 2015 | -0.17 | 0.11 | 1.287104 | 1.6566373  | 23.32708 | 0.153118 | 17.17 |
| 600388 | 2015 | -0.27 | 0.11 | 1.287104 | 1.6566373  | 23.32708 | 0.153118 | 17.17 |
| 601899 | 2015 | -0.43 | 0.11 | 1.287104 | 1.6566373  | 25.15306 | 0.042053 | 26.56 |
| 600388 | 2015 | -0.22 | 0.11 | 1.287104 | 1.6566373  | 23.32708 | 0.153118 | 17.17 |
| 600388 | 2015 | -0.24 | 0.11 | 1.287104 | 1.6566373  | 23.32708 | 0.153118 | 17.17 |
| 601899 | 2015 | -0.81 | 0.11 | 1.287104 | 1.6566373  | 25.15306 | 0.042053 | 26.56 |
| 600388 | 2015 | -0.5  | 0.11 | 1.287104 | 1.6566373  | 23.32708 | 0.153118 | 17.17 |
| 601899 | 2015 | -0.63 | 0.11 | 1.287104 | 1.6566373  | 25.15306 | 0.042053 | 26.56 |
| 601899 | 2015 | -0.7  | 0.11 | 1.287104 | 1.6566373  | 25.15306 | 0.042053 | 26.56 |
| 601899 | 2015 | -0.26 | 0.11 | 1.287104 | 1.6566373  | 25.15306 | 0.042053 | 26.56 |
| 601899 | 2015 | -0.95 | 0.11 | 1.287104 | 1.6566373  | 25.15306 | 0.042053 | 26.56 |
| 601899 | 2015 | 0.374 | 0.11 | 1.287104 | 1.6566373  | 25.15306 | 0.042053 | 26.56 |
| 600388 | 2015 | -0.5  | 0.11 | 1.287104 | 1.6566373  | 23.32708 | 0.153118 | 17.17 |

|        |      |       |      |          |            |          |          |       |
|--------|------|-------|------|----------|------------|----------|----------|-------|
| 600388 | 2015 | -0.27 | 0.11 | 1.287104 | 1.6566373  | 23.32708 | 0.153118 | 17.17 |
| 600388 | 2015 | -0.27 | 0.11 | 1.287104 | 1.6566373  | 23.09816 | 0.153118 | 17.17 |
| 600388 | 2015 | -0.18 | 0.11 | 1.287104 | 1.6566373  | 23.32708 | 0.153118 | 17.17 |
| 600388 | 2015 | -0.5  | 0.11 | 1.287104 | 1.6566373  | 23.32708 | 0.153118 | 17.17 |
| 601899 | 2015 | -0.26 | 0.11 | 1.287104 | 1.6566373  | 24.56391 | 0.042053 | 26.56 |
| 601899 | 2015 | -0.7  | 0.11 | 1.287104 | 1.6566373  | 25.15306 | 0.042053 | 26.56 |
| 601899 | 2015 | -0.53 | 0.11 | 1.287104 | 1.6566373  | 25.15306 | 0.042053 | 26.56 |
| 600388 | 2015 | 0.044 | 0.11 | 1.287104 | 1.6566373  | 23.32708 | 0.153118 | 17.17 |
| 600388 | 2015 | -0.06 | 0.11 | 1.287104 | 1.6566373  | 23.32708 | 0.153118 | 17.17 |
| 601011 | 2016 | 0.411 | 0.02 | 0.213973 | 0.04578437 | 22.92156 | 0.017608 | 36.36 |
| 601011 | 2016 | -0.75 | 0.02 | 0.213973 | 0.04578437 | 22.92156 | 0.017608 | 36.36 |
| 601011 | 2016 | -0.75 | 0.02 | 0.213973 | 0.04578437 | 22.92156 | 0.017608 | 36.36 |
| 601011 | 2016 | -0.75 | 0.02 | 0.213973 | 0.04578437 | 22.70556 | 0.017608 | 36.36 |
| 601011 | 2016 | -0.75 | 0.02 | 0.213973 | 0.04578437 | 22.92156 | 0.017608 | 36.36 |
| 601011 | 2016 | -0.52 | 0.02 | 0.213973 | 0.04578437 | 22.92156 | 0.017608 | 36.36 |
| 601011 | 2016 | -0.52 | 0.02 | 0.213973 | 0.04578437 | 22.92156 | 0.017608 | 36.36 |
| 2596   | 2016 | -0.75 | 1.16 | 1.131648 | 1.2806277  | 22.09304 | 0.033546 | 14.33 |
| 600896 | 2016 | 0.986 | 1.16 | 1.131648 | 1.2806277  | 22.12222 | -0.16    | 33.43 |
| 600896 | 2016 | 0.986 | 1.16 | 1.131648 | 1.2806277  | 22.19735 | -0.16    | 33.43 |
| 2596   | 2016 | 0.231 | 1.16 | 1.131648 | 1.2806277  | 21.88763 | 0.033546 | 14.33 |
| 600896 | 2016 | 0.986 | 1.16 | 1.131648 | 1.2806277  | 22.12222 | -0.16    | 33.43 |
| 2596   | 2016 | -0.1  | 1.16 | 1.131648 | 1.2806277  | 22.09304 | 0.033546 | 14.33 |
| 2596   | 2016 | 0.231 | 1.16 | 1.131648 | 1.2806277  | 22.09304 | 0.033546 | 14.33 |
| 2596   | 2016 | -0.75 | 1.16 | 1.131648 | 1.2806277  | 22.09304 | 0.033546 | 14.33 |
| 2684   | 2016 | -0.22 | 0.03 | 0.121825 | 0.01484124 | 22.54286 | 0.045259 | 28.21 |
| 600403 | 2016 | -0.86 | 0.03 | 0.121825 | 0.01484124 | 23.40208 | -0.31119 | 63.04 |
| 2684   | 2016 | -0.55 | 0.03 | 0.121825 | 0.01484124 | 22.54286 | 0.045259 | 28.21 |
| 600403 | 2016 | -0.86 | 0.03 | 0.121825 | 0.01484124 | 23.40208 | -0.31119 | 63.04 |
| 600403 | 2016 | -0.86 | 0.03 | 0.121825 | 0.01484124 | 23.40208 | -0.31119 | 63.04 |
| 2684   | 2016 | 0.113 | 0.03 | 0.121825 | 0.01484124 | 22.54286 | 0.045259 | 28.21 |
| 2684   | 2016 | -0.05 | 0.03 | 0.121825 | 0.01484124 | 22.54286 | 0.045259 | 28.21 |
| 2684   | 2016 | -0.11 | 0.03 | 0.121825 | 0.01484124 | 22.54286 | 0.045259 | 28.21 |
| 2684   | 2016 | -0.05 | 0.03 | 0.121825 | 0.01484124 | 22.54286 | 0.045259 | 28.21 |
| 2684   | 2016 | -0.36 | 0.03 | 0.121825 | 0.01484124 | 22.54286 | 0.045259 | 28.21 |
| 2684   | 2016 | -0.55 | 0.03 | 0.121825 | 0.01484124 | 22.54286 | 0.045259 | 28.21 |
| 2684   | 2016 | -0.28 | 0.03 | 0.121825 | 0.01484124 | 22.54286 | 0.045259 | 28.21 |
| 600403 | 2016 | -0.86 | 0.03 | 0.121825 | 0.01484124 | 23.40208 | -0.31119 | 63.04 |
| 2684   | 2016 | -0.22 | 0.03 | 0.121825 | 0.01484124 | 22.54286 | 0.045259 | 28.21 |
| 2684   | 2016 | 0.038 | 0.03 | 0.121825 | 0.01484124 | 22.54286 | 0.045259 | 28.21 |
| 600403 | 2016 | -0.86 | 0.03 | 0.121825 | 0.01484124 | 23.80073 | -0.31119 | 63.04 |
| 2684   | 2016 | -0.55 | 0.03 | 0.121825 | 0.01484124 | 22.54286 | 0.045259 | 28.21 |
| 2684   | 2016 | 0.547 | 0.03 | 0.121825 | 0.01484124 | 22.54286 | 0.045259 | 28.21 |
| 2684   | 2016 | 0.776 | 0.03 | 0.121825 | 0.01484124 | 22.54286 | 0.045259 | 28.21 |
| 2684   | 2016 | -0.55 | 0.03 | 0.121825 | 0.01484124 | 22.54286 | 0.045259 | 28.21 |
| 2684   | 2016 | -0.22 | 0.03 | 0.121825 | 0.01484124 | 22.54286 | 0.045259 | 28.21 |
| 2684   | 2016 | -0.27 | 0.03 | 0.121825 | 0.01484124 | 22.08727 | 0.045259 | 28.21 |
| 2684   | 2016 | -0.3  | 0.03 | 0.121825 | 0.01484124 | 22.54286 | 0.045259 | 28.21 |
| 2684   | 2016 | 0.113 | 0.03 | 0.121825 | 0.01484124 | 22.54286 | 0.045259 | 28.21 |
| 600373 | 2016 | 0.667 | 0.02 | 0.41252  | 0.17017234 | 23.65987 | 0.11417  | 54.83 |
| 600373 | 2016 | 0.078 | 0.02 | 0.41252  | 0.17017234 | 23.65987 | 0.11417  | 54.83 |
| 600373 | 2016 | 0.005 | 0.02 | 0.41252  | 0.17017234 | 23.65987 | 0.11417  | 54.83 |
| 600071 | 2016 | -0.73 | 0.02 | 0.41252  | 0.17017234 | 20.68281 | -0.25452 | 39.46 |
| 600071 | 2016 | -0.57 | 0.02 | 0.41252  | 0.17017234 | 20.68281 | -0.25452 | 39.46 |
| 600071 | 2016 | -0.78 | 0.02 | 0.41252  | 0.17017234 | 20.68281 | -0.25452 | 39.46 |

|        |      |       |      |          |            |          |          |       |
|--------|------|-------|------|----------|------------|----------|----------|-------|
| 600071 | 2016 | -0.74 | 0.02 | 0.41252  | 0.17017234 | 20.68281 | -0.25452 | 39.46 |
| 600373 | 2016 | -0.66 | 0.02 | 0.41252  | 0.17017234 | 22.98173 | 0.11417  | 54.83 |
| 600373 | 2016 | -0.66 | 0.02 | 0.41252  | 0.17017234 | 23.65987 | 0.11417  | 54.83 |
| 600071 | 2016 | -0.78 | 0.02 | 0.41252  | 0.17017234 | 20.68281 | -0.25452 | 39.46 |
| 600373 | 2016 | 0.005 | 0.02 | 0.41252  | 0.17017234 | 23.65987 | 0.11417  | 54.83 |
| 600071 | 2016 | -0.78 | 0.02 | 0.41252  | 0.17017234 | 20.10336 | -0.25452 | 39.46 |
| 600071 | 2016 | -0.78 | 0.02 | 0.41252  | 0.17017234 | 20.68281 | -0.25452 | 39.46 |
| 600071 | 2016 | -0.78 | 0.02 | 0.41252  | 0.17017234 | 20.68281 | -0.25452 | 39.46 |
| 600071 | 2016 | -0.78 | 0.02 | 0.41252  | 0.17017234 | 20.68281 | -0.25452 | 39.46 |
| 300376 | 2016 | -0.01 | 0.05 | 0.255934 | 0.06550202 | 22.93903 | 0.126704 | 56.77 |
| 600183 | 2016 | 0.304 | 0.05 | 0.255934 | 0.06550202 | 22.97812 | 0.143392 | 16.05 |
| 300083 | 2016 | -0.11 | 0.05 | 0.255934 | 0.06550202 | 22.98947 | 0.025666 | 24.09 |
| 2638   | 2016 | -0.19 | 0.05 | 0.255934 | 0.06550202 | 22.69226 | -0.08165 | 16.79 |
| 2638   | 2016 | -0.34 | 0.05 | 0.255934 | 0.06550202 | 22.69226 | -0.08165 | 16.79 |
| 600183 | 2016 | 0.494 | 0.05 | 0.255934 | 0.06550202 | 22.97812 | 0.143392 | 16.05 |
| 2317   | 2016 | 0.436 | 0.05 | 0.255934 | 0.06550202 | 22.16438 | 0.122799 | 27.09 |
| 300083 | 2016 | -0.33 | 0.05 | 0.255934 | 0.06550202 | 22.98947 | 0.025666 | 24.09 |
| 300410 | 2016 | -0.04 | 0.05 | 0.255934 | 0.06550202 | 21.16068 | 0.063353 | 50.31 |
| 2717   | 2016 | 0.104 | 0.05 | 0.255934 | 0.06550202 | 22.39799 | 0.098123 | 38.78 |
| 300083 | 2016 | -0.11 | 0.05 | 0.255934 | 0.06550202 | 22.9111  | 0.025666 | 24.09 |
| 600183 | 2016 | 0.339 | 0.05 | 0.255934 | 0.06550202 | 22.62791 | 0.143392 | 16.05 |
| 2717   | 2016 | 0.104 | 0.05 | 0.255934 | 0.06550202 | 22.39799 | 0.098123 | 38.78 |
| 2317   | 2016 | 0.751 | 0.05 | 0.255934 | 0.06550202 | 22.16438 | 0.122799 | 27.09 |
| 2317   | 2016 | 0.883 | 0.05 | 0.255934 | 0.06550202 | 22.03895 | 0.122799 | 27.09 |
| 2317   | 2016 | 1.004 | 0.05 | 0.255934 | 0.06550202 | 22.16438 | 0.122799 | 27.09 |
| 300083 | 2016 | -0.15 | 0.05 | 0.255934 | 0.06550202 | 22.98947 | 0.025666 | 24.09 |
| 300410 | 2016 | 0.273 | 0.05 | 0.255934 | 0.06550202 | 20.99879 | 0.063353 | 50.31 |
| 300083 | 2016 | -0.11 | 0.05 | 0.255934 | 0.06550202 | 22.98947 | 0.025666 | 24.09 |
| 2717   | 2016 | 0.131 | 0.05 | 0.255934 | 0.06550202 | 22.34359 | 0.098123 | 38.78 |
| 2717   | 2016 | 0.104 | 0.05 | 0.255934 | 0.06550202 | 22.39799 | 0.098123 | 38.78 |
| 300221 | 2016 | 0.501 | 0.05 | 0.255934 | 0.06550202 | 21.19878 | 0.167339 | 26.34 |
| 300328 | 2016 | 0.117 | 0.05 | 0.255934 | 0.06550202 | 20.84807 | 0.039106 | 43.93 |
| 600183 | 2016 | 0.554 | 0.05 | 0.255934 | 0.06550202 | 22.97812 | 0.143392 | 16.05 |
| 300410 | 2016 | -0.28 | 0.05 | 0.255934 | 0.06550202 | 21.16068 | 0.063353 | 50.31 |
| 300221 | 2016 | 0.639 | 0.05 | 0.255934 | 0.06550202 | 21.19878 | 0.167339 | 26.34 |
| 300376 | 2016 | 0.673 | 0.05 | 0.255934 | 0.06550202 | 22.93903 | 0.126704 | 56.77 |
| 2638   | 2016 | -0.19 | 0.05 | 0.255934 | 0.06550202 | 22.68544 | -0.08165 | 16.79 |
| 600183 | 2016 | 0.455 | 0.05 | 0.255934 | 0.06550202 | 22.97812 | 0.143392 | 16.05 |
| 300221 | 2016 | 0.433 | 0.05 | 0.255934 | 0.06550202 | 21.19878 | 0.167339 | 26.34 |
| 300083 | 2016 | -0.18 | 0.05 | 0.255934 | 0.06550202 | 22.98947 | 0.025666 | 24.09 |
| 2717   | 2016 | 0.131 | 0.05 | 0.255934 | 0.06550202 | 22.39799 | 0.098123 | 38.78 |
| 600183 | 2016 | 0.286 | 0.05 | 0.255934 | 0.06550202 | 22.97812 | 0.143392 | 16.05 |
| 300376 | 2016 | 0.673 | 0.05 | 0.255934 | 0.06550202 | 22.93903 | 0.126704 | 56.77 |
| 300328 | 2016 | 0.103 | 0.05 | 0.255934 | 0.06550202 | 20.84807 | 0.039106 | 43.93 |
| 300410 | 2016 | 0.124 | 0.05 | 0.255934 | 0.06550202 | 21.16068 | 0.063353 | 50.31 |
| 300376 | 2016 | 0.673 | 0.05 | 0.255934 | 0.06550202 | 22.93903 | 0.126704 | 56.77 |
| 300221 | 2016 | -0.45 | 0.05 | 0.255934 | 0.06550202 | 21.19878 | 0.167339 | 26.34 |
| 2317   | 2016 | 0.606 | 0.05 | 0.255934 | 0.06550202 | 22.16438 | 0.122799 | 27.09 |
| 300328 | 2016 | 0.363 | 0.05 | 0.255934 | 0.06550202 | 20.84807 | 0.039106 | 43.93 |
| 300083 | 2016 | -0.26 | 0.05 | 0.255934 | 0.06550202 | 22.98947 | 0.025666 | 24.09 |
| 2717   | 2016 | 0.104 | 0.05 | 0.255934 | 0.06550202 | 22.39799 | 0.098123 | 38.78 |
| 2638   | 2016 | -0.09 | 0.05 | 0.255934 | 0.06550202 | 22.69226 | -0.08165 | 16.79 |
| 300410 | 2016 | -0.09 | 0.05 | 0.255934 | 0.06550202 | 21.16068 | 0.063353 | 50.31 |
| 300083 | 2016 | -0.11 | 0.05 | 0.255934 | 0.06550202 | 22.98947 | 0.025666 | 24.09 |

|        |      |       |      |          |            |          |          |       |
|--------|------|-------|------|----------|------------|----------|----------|-------|
| 300328 | 2016 | -0.3  | 0.05 | 0.255934 | 0.06550202 | 20.84807 | 0.039106 | 43.93 |
| 300328 | 2016 | 0.103 | 0.05 | 0.255934 | 0.06550202 | 20.84807 | 0.039106 | 43.93 |
| 300221 | 2016 | -0.45 | 0.05 | 0.255934 | 0.06550202 | 21.19878 | 0.167339 | 26.34 |
| 300376 | 2016 | -0.01 | 0.05 | 0.255934 | 0.06550202 | 22.93903 | 0.126704 | 56.77 |
| 2638   | 2016 | -0.39 | 0.05 | 0.255934 | 0.06550202 | 22.69226 | -0.08165 | 16.79 |
| 2638   | 2016 | -0.3  | 0.05 | 0.255934 | 0.06550202 | 22.69226 | -0.08165 | 16.79 |
| 2638   | 2016 | -0.3  | 0.05 | 0.255934 | 0.06550202 | 22.69226 | -0.08165 | 16.79 |
| 300221 | 2016 | 0.433 | 0.05 | 0.255934 | 0.06550202 | 20.87315 | 0.167339 | 26.34 |
| 600183 | 2016 | 0.304 | 0.05 | 0.255934 | 0.06550202 | 22.97812 | 0.143392 | 16.05 |
| 2757   | 2016 | -0.36 | 0.05 | 0.255934 | 0.06550202 | 20.6895  | 0.085811 | 45.17 |
| 300083 | 2016 | -0.11 | 0.05 | 0.255934 | 0.06550202 | 22.98947 | 0.025666 | 24.09 |
| 2717   | 2016 | 0.104 | 0.05 | 0.255934 | 0.06550202 | 22.39799 | 0.098123 | 38.78 |
| 600183 | 2016 | 0.206 | 0.05 | 0.255934 | 0.06550202 | 22.97812 | 0.143392 | 16.05 |
| 2317   | 2016 | 0.883 | 0.05 | 0.255934 | 0.06550202 | 22.16438 | 0.122799 | 27.09 |
| 300221 | 2016 | -0.23 | 0.05 | 0.255934 | 0.06550202 | 21.19878 | 0.167339 | 26.34 |
| 2757   | 2016 | -0.36 | 0.05 | 0.255934 | 0.06550202 | 20.6895  | 0.085811 | 45.17 |
| 300221 | 2016 | 0.482 | 0.05 | 0.255934 | 0.06550202 | 21.19878 | 0.167339 | 26.34 |
| 2638   | 2016 | -0.3  | 0.05 | 0.255934 | 0.06550202 | 22.69226 | -0.08165 | 16.79 |
| 300376 | 2016 | 0.673 | 0.05 | 0.255934 | 0.06550202 | 22.93903 | 0.126704 | 56.77 |
| 300221 | 2016 | 0.776 | 0.05 | 0.255934 | 0.06550202 | 21.19878 | 0.167339 | 26.34 |
| 2503   | 2016 | -0.35 | 0.05 | 0.255934 | 0.06550202 | 22.57937 | 0.075998 | 43.88 |
| 300376 | 2016 | 0.673 | 0.05 | 0.255934 | 0.06550202 | 22.93903 | 0.126704 | 56.77 |
| 300328 | 2016 | 0.111 | 0.05 | 0.255934 | 0.06550202 | 20.84807 | 0.039106 | 43.93 |
| 2717   | 2016 | 0.129 | 0.05 | 0.255934 | 0.06550202 | 22.39799 | 0.098123 | 38.78 |
| 300083 | 2016 | 0.055 | 0.05 | 0.255934 | 0.06550202 | 22.98947 | 0.025666 | 24.09 |
| 300460 | 2016 | 0.013 | 0.05 | 0.255934 | 0.06550202 | 20.58982 | 0.043042 | 38.25 |
| 2503   | 2016 | -0.35 | 0.05 | 0.255934 | 0.06550202 | 22.69661 | 0.075998 | 43.88 |
| 300376 | 2016 | 0.577 | 0.05 | 0.255934 | 0.06550202 | 22.89008 | 0.126704 | 56.77 |
| 300221 | 2016 | 0.639 | 0.05 | 0.255934 | 0.06550202 | 21.19878 | 0.167339 | 26.34 |
| 300083 | 2016 | -0    | 0.05 | 0.255934 | 0.06550202 | 22.98947 | 0.025666 | 24.09 |
| 300328 | 2016 | -0.3  | 0.05 | 0.255934 | 0.06550202 | 20.7298  | 0.039106 | 43.93 |
| 300083 | 2016 | -0.11 | 0.05 | 0.255934 | 0.06550202 | 22.98947 | 0.025666 | 24.09 |
| 600183 | 2016 | 0.206 | 0.05 | 0.255934 | 0.06550202 | 22.97812 | 0.143392 | 16.05 |
| 300460 | 2016 | 0.013 | 0.05 | 0.255934 | 0.06550202 | 20.58982 | 0.043042 | 38.25 |
| 2503   | 2016 | -0.35 | 0.05 | 0.255934 | 0.06550202 | 22.69661 | 0.075998 | 43.88 |
| 300328 | 2016 | 0.259 | 0.05 | 0.255934 | 0.06550202 | 20.84807 | 0.039106 | 43.93 |
| 300410 | 2016 | -0.04 | 0.05 | 0.255934 | 0.06550202 | 21.16068 | 0.063353 | 50.31 |
| 2757   | 2016 | -0.37 | 0.05 | 0.255934 | 0.06550202 | 20.6895  | 0.085811 | 45.17 |
| 300083 | 2016 | -0.64 | 0.05 | 0.255934 | 0.06550202 | 22.98947 | 0.025666 | 24.09 |
| 300410 | 2016 | -0.13 | 0.05 | 0.255934 | 0.06550202 | 21.16068 | 0.063353 | 50.31 |
| 300410 | 2016 | 0.273 | 0.05 | 0.255934 | 0.06550202 | 21.16068 | 0.063353 | 50.31 |
| 300328 | 2016 | 0.131 | 0.05 | 0.255934 | 0.06550202 | 20.84807 | 0.039106 | 43.93 |
| 300460 | 2016 | 0.013 | 0.05 | 0.255934 | 0.06550202 | 20.58176 | 0.043042 | 38.25 |
| 300410 | 2016 | -0.04 | 0.05 | 0.255934 | 0.06550202 | 21.16068 | 0.063353 | 50.31 |
| 300328 | 2016 | 0.363 | 0.05 | 0.255934 | 0.06550202 | 20.84807 | 0.039106 | 43.93 |
| 2757   | 2016 | -0.3  | 0.05 | 0.255934 | 0.06550202 | 20.6895  | 0.085811 | 45.17 |
| 300083 | 2016 | -0.25 | 0.05 | 0.255934 | 0.06550202 | 22.98947 | 0.025666 | 24.09 |
| 600308 | 2016 | -0.13 | 0    | 0.324862 | 0.10553548 | 23.42418 | 0.026785 | 35.64 |
| 600308 | 2016 | -0.13 | 0    | 0.324862 | 0.10553548 | 23.42418 | 0.026785 | 35.64 |
| 603026 | 2016 | -0.51 | 0    | 0.324862 | 0.10553548 | 21.51218 | 0.117647 | 28.21 |
| 603026 | 2016 | -0.51 | 0    | 0.324862 | 0.10553548 | 21.51218 | 0.117647 | 28.21 |
| 2476   | 2016 | -0.32 | 0    | 0.324862 | 0.10553548 | 21.09473 | -0.00522 | 13.58 |
| 2476   | 2016 | 0.736 | 0    | 0.324862 | 0.10553548 | 21.09473 | -0.00522 | 13.58 |
| 2476   | 2016 | -0.32 | 0    | 0.324862 | 0.10553548 | 21.05114 | -0.00522 | 13.58 |

|        |      |       |      |          |            |          |          |       |
|--------|------|-------|------|----------|------------|----------|----------|-------|
| 600308 | 2016 | 0.09  | 0    | 0.324862 | 0.10553548 | 23.42418 | 0.026785 | 35.64 |
| 300285 | 2016 | 0.102 | 0    | 0.324862 | 0.10553548 | 21.4258  | 0.081962 | 24.6  |
| 300285 | 2016 | 1.002 | 0    | 0.324862 | 0.10553548 | 21.52671 | 0.081962 | 24.6  |
| 600308 | 2016 | 0.09  | 0    | 0.324862 | 0.10553548 | 23.42418 | 0.026785 | 35.64 |
| 600986 | 2016 | -0.51 | 0    | 0.324862 | 0.10553548 | 22.82295 | 0.095837 | 16.04 |
| 600986 | 2016 | -0.64 | 0    | 0.324862 | 0.10553548 | 22.45756 | 0.095837 | 16.04 |
| 300285 | 2016 | 0.904 | 0    | 0.324862 | 0.10553548 | 21.52671 | 0.081962 | 24.6  |
| 600308 | 2016 | 0.09  | 0    | 0.324862 | 0.10553548 | 23.42418 | 0.026785 | 35.64 |
| 600308 | 2016 | 0.09  | 0    | 0.324862 | 0.10553548 | 23.16055 | 0.026785 | 35.64 |
| 600308 | 2016 | 0.09  | 0    | 0.324862 | 0.10553548 | 23.42418 | 0.026785 | 35.64 |
| 300285 | 2016 | 0.741 | 0    | 0.324862 | 0.10553548 | 21.52671 | 0.081962 | 24.6  |
| 300285 | 2016 | 1.002 | 0    | 0.324862 | 0.10553548 | 21.52671 | 0.081962 | 24.6  |
| 2476   | 2016 | 0.074 | 0    | 0.324862 | 0.10553548 | 21.09473 | -0.00522 | 13.58 |
| 603026 | 2016 | -0.51 | 0    | 0.324862 | 0.10553548 | 21.51218 | 0.117647 | 28.21 |
| 300285 | 2016 | 0.462 | 0    | 0.324862 | 0.10553548 | 21.52671 | 0.081962 | 24.6  |
| 603026 | 2016 | -0.51 | 0    | 0.324862 | 0.10553548 | 21.41409 | 0.117647 | 28.21 |
| 2476   | 2016 | 0.736 | 0    | 0.324862 | 0.10553548 | 21.09473 | -0.00522 | 13.58 |
| 600308 | 2016 | 0.09  | 0    | 0.324862 | 0.10553548 | 23.42418 | 0.026785 | 35.64 |
| 600308 | 2016 | 0.09  | 0    | 0.324862 | 0.10553548 | 23.42418 | 0.026785 | 35.64 |
| 603026 | 2016 | -0.51 | 0    | 0.324862 | 0.10553548 | 21.51218 | 0.117647 | 28.21 |
| 2476   | 2016 | 0.074 | 0    | 0.324862 | 0.10553548 | 21.09473 | -0.00522 | 13.58 |
| 600986 | 2016 | -0.64 | 0    | 0.324862 | 0.10553548 | 22.82295 | 0.095837 | 16.04 |
| 603026 | 2016 | -0.51 | 0    | 0.324862 | 0.10553548 | 21.51218 | 0.117647 | 28.21 |
| 603026 | 2016 | -0.51 | 0    | 0.324862 | 0.10553548 | 21.51218 | 0.117647 | 28.21 |
| 300285 | 2016 | 1.002 | 0    | 0.324862 | 0.10553548 | 21.52671 | 0.081962 | 24.6  |
| 600986 | 2016 | -0.56 | 0    | 0.324862 | 0.10553548 | 22.82295 | 0.095837 | 16.04 |
| 2476   | 2016 | 0.074 | 0    | 0.324862 | 0.10553548 | 21.09473 | -0.00522 | 13.58 |
| 300285 | 2016 | 0.904 | 0    | 0.324862 | 0.10553548 | 21.52671 | 0.081962 | 24.6  |
| 600986 | 2016 | -0.51 | 0    | 0.324862 | 0.10553548 | 22.82295 | 0.095837 | 16.04 |
| 600308 | 2016 | 0.035 | 0    | 0.324862 | 0.10553548 | 23.42418 | 0.026785 | 35.64 |
| 2035   | 2016 | -0.65 | 0.05 | 0.916291 | 0.83958871 | 22.00234 | 0.190268 | 13.86 |
| 2035   | 2016 | -0.53 | 0.05 | 0.916291 | 0.83958871 | 22.00234 | 0.190268 | 13.86 |
| 2511   | 2016 | -0.89 | 0.05 | 0.916291 | 0.83958871 | 22.23011 | 0.09658  | 29.16 |
| 600872 | 2016 | -0.01 | 0.05 | 0.916291 | 0.83958871 | 22.31472 | 0.13281  | 20.14 |
| 2249   | 2016 | -0.13 | 0.05 | 0.916291 | 0.83958871 | 23.39826 | 0.061668 | 31.88 |
| 600872 | 2016 | -0.06 | 0.05 | 0.916291 | 0.83958871 | 22.31472 | 0.13281  | 20.14 |
| 2035   | 2016 | -0.51 | 0.05 | 0.916291 | 0.83958871 | 22.00234 | 0.190268 | 13.86 |
| 2249   | 2016 | -0.16 | 0.05 | 0.916291 | 0.83958871 | 23.39826 | 0.061668 | 31.88 |
| 2035   | 2016 | -0.76 | 0.05 | 0.916291 | 0.83958871 | 22.00234 | 0.190268 | 13.86 |
| 2249   | 2016 | -0.38 | 0.05 | 0.916291 | 0.83958871 | 23.39826 | 0.061668 | 31.88 |
| 2668   | 2016 | -0.27 | 0.05 | 0.916291 | 0.83958871 | 22.3975  | 0.176547 | 20.38 |
| 2035   | 2016 | -0.76 | 0.05 | 0.916291 | 0.83958871 | 22.00234 | 0.190268 | 13.86 |
| 2745   | 2016 | -0.68 | 0.05 | 0.916291 | 0.83958871 | 23.35683 | 0.090308 | 67.32 |
| 600872 | 2016 | -0.06 | 0.05 | 0.916291 | 0.83958871 | 21.6982  | 0.13281  | 20.14 |
| 2249   | 2016 | -0.19 | 0.05 | 0.916291 | 0.83958871 | 23.39826 | 0.061668 | 31.88 |
| 2745   | 2016 | -0.57 | 0.05 | 0.916291 | 0.83958871 | 23.35683 | 0.090308 | 67.32 |
| 2616   | 2016 | -0.61 | 0.05 | 0.916291 | 0.83958871 | 21.90367 | 0.082428 | 25.68 |
| 2249   | 2016 | -0.21 | 0.05 | 0.916291 | 0.83958871 | 23.39826 | 0.061668 | 31.88 |
| 2035   | 2016 | -0.66 | 0.05 | 0.916291 | 0.83958871 | 22.00234 | 0.190268 | 13.86 |
| 2249   | 2016 | -0.21 | 0.05 | 0.916291 | 0.83958871 | 23.39826 | 0.061668 | 31.88 |
| 2616   | 2016 | -0.81 | 0.05 | 0.916291 | 0.83958871 | 21.90367 | 0.082428 | 25.68 |
| 2745   | 2016 | -0.68 | 0.05 | 0.916291 | 0.83958871 | 23.35683 | 0.090308 | 67.32 |
| 2249   | 2016 | -0.11 | 0.05 | 0.916291 | 0.83958871 | 23.39826 | 0.061668 | 31.88 |
| 300359 | 2016 | 0.7   | 0.05 | 0.916291 | 0.83958871 | 21.53502 | 0.067546 | 33.17 |

|        |      |       |      |          |            |          |          |       |
|--------|------|-------|------|----------|------------|----------|----------|-------|
| 2745   | 2016 | -0.68 | 0.05 | 0.916291 | 0.83958871 | 23.35683 | 0.090308 | 67.32 |
| 2745   | 2016 | -0.13 | 0.05 | 0.916291 | 0.83958871 | 23.35683 | 0.090308 | 67.32 |
| 2249   | 2016 | -0.51 | 0.05 | 0.916291 | 0.83958871 | 23.39826 | 0.061668 | 31.88 |
| 2249   | 2016 | -0.25 | 0.05 | 0.916291 | 0.83958871 | 23.15471 | 0.061668 | 31.88 |
| 2249   | 2016 | 0.34  | 0.05 | 0.916291 | 0.83958871 | 23.39826 | 0.061668 | 31.88 |
| 300359 | 2016 | 0.7   | 0.05 | 0.916291 | 0.83958871 | 21.53502 | 0.067546 | 33.17 |
| 2249   | 2016 | -0.51 | 0.05 | 0.916291 | 0.83958871 | 23.39826 | 0.061668 | 31.88 |
| 2249   | 2016 | 0.47  | 0.05 | 0.916291 | 0.83958871 | 23.39826 | 0.061668 | 31.88 |
| 2035   | 2016 | -0.53 | 0.05 | 0.916291 | 0.83958871 | 21.83295 | 0.190268 | 13.86 |
| 2249   | 2016 | -0.51 | 0.05 | 0.916291 | 0.83958871 | 23.39826 | 0.061668 | 31.88 |
| 2745   | 2016 | -0.65 | 0.05 | 0.916291 | 0.83958871 | 23.35683 | 0.090308 | 67.32 |
| 2249   | 2016 | -0.04 | 0.05 | 0.916291 | 0.83958871 | 23.39826 | 0.061668 | 31.88 |
| 2035   | 2016 | -0.76 | 0.05 | 0.916291 | 0.83958871 | 22.00234 | 0.190268 | 13.86 |
| 2249   | 2016 | -0.13 | 0.05 | 0.916291 | 0.83958871 | 23.39826 | 0.061668 | 31.88 |
| 2249   | 2016 | -0.04 | 0.05 | 0.916291 | 0.83958871 | 23.39826 | 0.061668 | 31.88 |
| 2249   | 2016 | -0.21 | 0.05 | 0.916291 | 0.83958871 | 23.39826 | 0.061668 | 31.88 |
| 2745   | 2016 | -0.57 | 0.05 | 0.916291 | 0.83958871 | 23.35683 | 0.090308 | 67.32 |
| 600872 | 2016 | -0.06 | 0.05 | 0.916291 | 0.83958871 | 22.31472 | 0.13281  | 20.14 |
| 2511   | 2016 | -0.89 | 0.05 | 0.916291 | 0.83958871 | 22.23011 | 0.09658  | 29.16 |
| 2616   | 2016 | -0.81 | 0.05 | 0.916291 | 0.83958871 | 21.90367 | 0.082428 | 25.68 |
| 2668   | 2016 | -0.47 | 0.05 | 0.916291 | 0.83958871 | 22.3975  | 0.176547 | 20.38 |
| 2035   | 2016 | -0.51 | 0.05 | 0.916291 | 0.83958871 | 22.00234 | 0.190268 | 13.86 |
| 2511   | 2016 | -0.89 | 0.05 | 0.916291 | 0.83958871 | 22.23011 | 0.09658  | 29.16 |
| 2745   | 2016 | -0.13 | 0.05 | 0.916291 | 0.83958871 | 23.35683 | 0.090308 | 67.32 |
| 2249   | 2016 | 0.813 | 0.05 | 0.916291 | 0.83958871 | 23.39826 | 0.061668 | 31.88 |
| 2249   | 2016 | -0.51 | 0.05 | 0.916291 | 0.83958871 | 23.39826 | 0.061668 | 31.88 |
| 2745   | 2016 | -0.68 | 0.05 | 0.916291 | 0.83958871 | 23.35683 | 0.090308 | 67.32 |
| 2616   | 2016 | -0.68 | 0.05 | 0.916291 | 0.83958871 | 21.90367 | 0.082428 | 25.68 |
| 2668   | 2016 | -0.27 | 0.05 | 0.916291 | 0.83958871 | 22.3975  | 0.176547 | 20.38 |
| 2745   | 2016 | -0.54 | 0.05 | 0.916291 | 0.83958871 | 23.35683 | 0.090308 | 67.32 |
| 2668   | 2016 | -0.47 | 0.05 | 0.916291 | 0.83958871 | 22.3975  | 0.176547 | 20.38 |
| 2511   | 2016 | -0.89 | 0.05 | 0.916291 | 0.83958871 | 21.83269 | 0.09658  | 29.16 |
| 600872 | 2016 | -0.04 | 0.05 | 0.916291 | 0.83958871 | 22.31472 | 0.13281  | 20.14 |
| 300359 | 2016 | 0.7   | 0.05 | 0.916291 | 0.83958871 | 21.66739 | 0.067546 | 33.17 |
| 2668   | 2016 | -0.29 | 0.05 | 0.916291 | 0.83958871 | 21.81582 | 0.176547 | 20.38 |
| 600872 | 2016 | -0.62 | 0.05 | 0.916291 | 0.83958871 | 22.31472 | 0.13281  | 20.14 |
| 2668   | 2016 | -0.25 | 0.05 | 0.916291 | 0.83958871 | 22.3975  | 0.176547 | 20.38 |
| 2745   | 2016 | -0.58 | 0.05 | 0.916291 | 0.83958871 | 23.35683 | 0.090308 | 67.32 |
| 2249   | 2016 | -0.38 | 0.05 | 0.916291 | 0.83958871 | 23.39826 | 0.061668 | 31.88 |
| 300359 | 2016 | 0.7   | 0.05 | 0.916291 | 0.83958871 | 21.66739 | 0.067546 | 33.17 |
| 2511   | 2016 | -0.89 | 0.05 | 0.916291 | 0.83958871 | 22.23011 | 0.09658  | 29.16 |
| 2745   | 2016 | -0.68 | 0.05 | 0.916291 | 0.83958871 | 23.20295 | 0.090308 | 67.32 |
| 2249   | 2016 | -0.21 | 0.05 | 0.916291 | 0.83958871 | 23.39826 | 0.061668 | 31.88 |
| 2511   | 2016 | -0.89 | 0.05 | 0.916291 | 0.83958871 | 22.23011 | 0.09658  | 29.16 |
| 2249   | 2016 | -0.21 | 0.05 | 0.916291 | 0.83958871 | 23.39826 | 0.061668 | 31.88 |
| 600872 | 2016 | -0.06 | 0.05 | 0.916291 | 0.83958871 | 22.31472 | 0.13281  | 20.14 |
| 2616   | 2016 | -0.61 | 0.05 | 0.916291 | 0.83958871 | 21.47612 | 0.082428 | 25.68 |
| 2470   | 2016 | 0.41  | 0    | 1.848739 | 3.4178371  | 23.42992 | 0.087329 | 39    |
| 915    | 2016 | -0.11 | 0    | 1.848739 | 3.4178371  | 21.63242 | 0.180041 | 20.72 |
| 915    | 2016 | -0.19 | 0    | 1.848739 | 3.4178371  | 21.63242 | 0.180041 | 20.72 |
| 2470   | 2016 | 0.578 | 0    | 1.848739 | 3.4178371  | 23.12954 | 0.087329 | 39    |
| 2588   | 2016 | 0.279 | 0    | 1.848739 | 3.4178371  | 22.64868 | 0.118766 | 22.7  |
| 2588   | 2016 | 0.058 | 0    | 1.848739 | 3.4178371  | 22.64868 | 0.118766 | 22.7  |
| 2470   | 2016 | 0.578 | 0    | 1.848739 | 3.4178371  | 23.42992 | 0.087329 | 39    |

|        |      |       |      |          |            |          |          |       |
|--------|------|-------|------|----------|------------|----------|----------|-------|
| 2470   | 2016 | 0.462 | 0    | 1.848739 | 3.4178371  | 23.42992 | 0.087329 | 39    |
| 2588   | 2016 | 0.057 | 0    | 1.848739 | 3.4178371  | 22.64868 | 0.118766 | 22.7  |
| 2588   | 2016 | 0.72  | 0    | 1.848739 | 3.4178371  | 22.64868 | 0.118766 | 22.7  |
| 2588   | 2016 | -0.03 | 0    | 1.848739 | 3.4178371  | 22.64868 | 0.118766 | 22.7  |
| 2470   | 2016 | 0.447 | 0    | 1.848739 | 3.4178371  | 23.42992 | 0.087329 | 39    |
| 2588   | 2016 | 0.058 | 0    | 1.848739 | 3.4178371  | 22.64868 | 0.118766 | 22.7  |
| 2588   | 2016 | -0.53 | 0    | 1.848739 | 3.4178371  | 22.64868 | 0.118766 | 22.7  |
| 2588   | 2016 | -0.22 | 0    | 1.848739 | 3.4178371  | 22.64868 | 0.118766 | 22.7  |
| 915    | 2016 | -0.66 | 0    | 1.848739 | 3.4178371  | 21.63242 | 0.180041 | 20.72 |
| 2588   | 2016 | 0.72  | 0    | 1.848739 | 3.4178371  | 22.64868 | 0.118766 | 22.7  |
| 2470   | 2016 | 0.578 | 0    | 1.848739 | 3.4178371  | 23.42992 | 0.087329 | 39    |
| 2588   | 2016 | -0.09 | 0    | 1.848739 | 3.4178371  | 22.64868 | 0.118766 | 22.7  |
| 915    | 2016 | -0.28 | 0    | 1.848739 | 3.4178371  | 21.63242 | 0.180041 | 20.72 |
| 915    | 2016 | -0.08 | 0    | 1.848739 | 3.4178371  | 20.29362 | 0.180041 | 20.72 |
| 2588   | 2016 | 0.058 | 0    | 1.848739 | 3.4178371  | 22.64868 | 0.118766 | 22.7  |
| 2470   | 2016 | -0.11 | 0    | 1.848739 | 3.4178371  | 23.42992 | 0.087329 | 39    |
| 915    | 2016 | -0.19 | 0    | 1.848739 | 3.4178371  | 21.63242 | 0.180041 | 20.72 |
| 2588   | 2016 | -0.03 | 0    | 1.848739 | 3.4178371  | 22.64868 | 0.118766 | 22.7  |
| 2588   | 2016 | 0.72  | 0    | 1.848739 | 3.4178371  | 22.64868 | 0.118766 | 22.7  |
| 2470   | 2016 | 0.447 | 0    | 1.848739 | 3.4178371  | 23.42992 | 0.087329 | 39    |
| 2588   | 2016 | -0.27 | 0    | 1.848739 | 3.4178371  | 22.64868 | 0.118766 | 22.7  |
| 915    | 2016 | -0.17 | 0    | 1.848739 | 3.4178371  | 21.63242 | 0.180041 | 20.72 |
| 2470   | 2016 | 0.476 | 0    | 1.848739 | 3.4178371  | 23.42992 | 0.087329 | 39    |
| 2470   | 2016 | 0.578 | 0    | 1.848739 | 3.4178371  | 23.42992 | 0.087329 | 39    |
| 2588   | 2016 | 0.72  | 0    | 1.848739 | 3.4178371  | 22.47578 | 0.118766 | 22.7  |
| 915    | 2016 | 0.124 | 0    | 1.848739 | 3.4178371  | 21.63242 | 0.180041 | 20.72 |
| 600303 | 2016 | -0.6  | 0    | 0.13989  | 0.01956915 | 22.35049 | 0.023099 | 21.27 |
| 600303 | 2016 | -0.55 | 0    | 0.13989  | 0.01956915 | 22.95467 | 0.023099 | 21.27 |
| 600303 | 2016 | -0.13 | 0    | 0.13989  | 0.01956915 | 22.95467 | 0.023099 | 21.27 |
| 600303 | 2016 | -0.13 | 0    | 0.13989  | 0.01956915 | 22.95467 | 0.023099 | 21.27 |
| 600303 | 2016 | -0.79 | 0    | 0.13989  | 0.01956915 | 22.95467 | 0.023099 | 21.27 |
| 600303 | 2016 | -0.79 | 0    | 0.13989  | 0.01956915 | 22.95467 | 0.023099 | 21.27 |
| 600303 | 2016 | -0.79 | 0    | 0.13989  | 0.01956915 | 22.95467 | 0.023099 | 21.27 |
| 600303 | 2016 | -0.6  | 0    | 0.13989  | 0.01956915 | 22.95467 | 0.023099 | 21.27 |
| 601216 | 2016 | -0.21 | 0.01 | 1.726707 | 2.9815178  | 23.61541 | 0.115778 | 31.95 |
| 601216 | 2016 | -0.24 | 0.01 | 1.726707 | 2.9815178  | 23.61541 | 0.115778 | 31.95 |
| 601216 | 2016 | -0.25 | 0.01 | 1.726707 | 2.9815178  | 23.35933 | 0.115778 | 31.95 |
| 601216 | 2016 | -0.24 | 0.01 | 1.726707 | 2.9815178  | 23.61541 | 0.115778 | 31.95 |
| 601216 | 2016 | -0.24 | 0.01 | 1.726707 | 2.9815178  | 23.61541 | 0.115778 | 31.95 |
| 601216 | 2016 | 0.707 | 0.01 | 1.726707 | 2.9815178  | 23.61541 | 0.115778 | 31.95 |
| 600291 | 2016 | -0.31 | 0.01 | 1.726707 | 2.9815178  | 25.74206 | 0.012265 | 10.75 |
| 600291 | 2016 | -0.31 | 0.01 | 1.726707 | 2.9815178  | 23.5744  | 0.012265 | 10.75 |
| 601216 | 2016 | -0.24 | 0.01 | 1.726707 | 2.9815178  | 23.61541 | 0.115778 | 31.95 |
| 601216 | 2016 | 0.707 | 0.01 | 1.726707 | 2.9815178  | 23.61541 | 0.115778 | 31.95 |
| 600291 | 2016 | -0.31 | 0.01 | 1.726707 | 2.9815178  | 25.74206 | 0.012265 | 10.75 |
| 603333 | 2016 | -0.64 | 0.01 | 1.306245 | 1.7062752  | 21.23591 | -0.05531 | 57.98 |
| 603333 | 2016 | -0.32 | 0.01 | 1.306245 | 1.7062752  | 21.23591 | -0.05531 | 57.98 |
| 603333 | 2016 | -0.07 | 0.01 | 1.306245 | 1.7062752  | 21.23591 | -0.05531 | 57.98 |
| 603333 | 2016 | -0.64 | 0.01 | 1.306245 | 1.7062752  | 21.19244 | -0.05531 | 57.98 |
| 603333 | 2016 | -0.07 | 0.01 | 1.306245 | 1.7062752  | 21.23591 | -0.05531 | 57.98 |
| 300498 | 2016 | -0.28 | 0.05 | 1.394296 | 1.9440621  | 24.44747 | 0.302158 | 7.84  |
| 300498 | 2016 | -0.16 | 0.05 | 1.394296 | 1.9440621  | 24.44747 | 0.302158 | 7.84  |
| 300498 | 2016 | -0.94 | 0.05 | 1.394296 | 1.9440621  | 24.44747 | 0.302158 | 7.84  |
| 300498 | 2016 | -0.49 | 0.05 | 1.394296 | 1.9440621  | 24.44747 | 0.302158 | 7.84  |

|        |      |       |      |          |            |          |          |       |
|--------|------|-------|------|----------|------------|----------|----------|-------|
| 300498 | 2016 | -0.24 | 0.05 | 1.394296 | 1.9440621  | 24.44747 | 0.302158 | 7.84  |
| 300498 | 2016 | -0.19 | 0.05 | 1.394296 | 1.9440621  | 24.44747 | 0.302158 | 7.84  |
| 300498 | 2016 | -0.94 | 0.05 | 1.394296 | 1.9440621  | 24.44747 | 0.302158 | 7.84  |
| 300498 | 2016 | 0.322 | 0.05 | 1.394296 | 1.9440621  | 24.44747 | 0.302158 | 7.84  |
| 300498 | 2016 | -0.94 | 0.05 | 1.394296 | 1.9440621  | 24.44747 | 0.302158 | 7.84  |
| 300498 | 2016 | -0.94 | 0.05 | 1.394296 | 1.9440621  | 24.44747 | 0.302158 | 7.84  |
| 300498 | 2016 | 0.383 | 0.05 | 1.394296 | 1.9440621  | 24.44747 | 0.302158 | 7.84  |
| 300498 | 2016 | -0.94 | 0.05 | 1.394296 | 1.9440621  | 23.96655 | 0.302158 | 7.84  |
| 300498 | 2016 | -0.94 | 0.05 | 1.394296 | 1.9440621  | 24.44747 | 0.302158 | 7.84  |
| 300498 | 2016 | -0.94 | 0.05 | 1.394296 | 1.9440621  | 24.44747 | 0.302158 | 7.84  |
| 300498 | 2016 | -0.31 | 0.05 | 1.394296 | 1.9440621  | 24.44747 | 0.302158 | 7.84  |
| 300498 | 2016 | -0.94 | 0.05 | 1.394296 | 1.9440621  | 24.44747 | 0.302158 | 7.84  |
| 300498 | 2016 | -0.94 | 0.05 | 1.394296 | 1.9440621  | 24.44747 | 0.302158 | 7.84  |
| 300498 | 2016 | -0.24 | 0.05 | 1.394296 | 1.9440621  | 24.44747 | 0.302158 | 7.84  |
| 596    | 2016 | 0.652 | 0.03 | 0.693147 | 0.48045301 | 22.89074 | 0.143134 | 53.89 |
| 596    | 2016 | -0.6  | 0.03 | 0.693147 | 0.48045301 | 22.89074 | 0.143134 | 53.89 |
| 596    | 2016 | -0.56 | 0.03 | 0.693147 | 0.48045301 | 22.89074 | 0.143134 | 53.89 |
| 596    | 2016 | 0.652 | 0.03 | 0.693147 | 0.48045301 | 22.89074 | 0.143134 | 53.89 |
| 596    | 2016 | -0.6  | 0.03 | 0.693147 | 0.48045301 | 22.89074 | 0.143134 | 53.89 |
| 596    | 2016 | -0.67 | 0.03 | 0.693147 | 0.48045301 | 22.73112 | 0.143134 | 53.89 |
| 596    | 2016 | -0.38 | 0.03 | 0.693147 | 0.48045301 | 22.89074 | 0.143134 | 53.89 |
| 596    | 2016 | -0.33 | 0.03 | 0.693147 | 0.48045301 | 22.89074 | 0.143134 | 53.89 |
| 596    | 2016 | -0.51 | 0.03 | 0.693147 | 0.48045301 | 22.89074 | 0.143134 | 53.89 |
| 2611   | 2016 | -0.22 | 0.05 | 0.0066   | 0.00004356 | 21.84674 | 0.074889 | 34.15 |
| 333    | 2016 | 0.22  | 0.05 | 0.0066   | 0.00004356 | 25.74206 | 0.22996  | 34.75 |
| 600499 | 2016 | -0.09 | 0.05 | 0.0066   | 0.00004356 | 22.855   | 0.067257 | 12.33 |
| 333    | 2016 | -0.13 | 0.05 | 0.0066   | 0.00004356 | 25.74206 | 0.22996  | 34.75 |
| 333    | 2016 | -0.1  | 0.05 | 0.0066   | 0.00004356 | 25.74206 | 0.22996  | 34.75 |
| 541    | 2016 | -0.64 | 0.05 | 0.0066   | 0.00004356 | 22.53158 | 0.214417 | 13.47 |
| 333    | 2016 | -0.1  | 0.05 | 0.0066   | 0.00004356 | 25.74206 | 0.22996  | 34.75 |
| 300415 | 2016 | -0.3  | 0.05 | 0.0066   | 0.00004356 | 21.31445 | 0.131622 | 33.75 |
| 300004 | 2016 | -0.32 | 0.05 | 0.0066   | 0.00004356 | 22.06519 | 0.027454 | 12.37 |
| 921    | 2016 | -0.27 | 0.05 | 0.0066   | 0.00004356 | 22.49397 | 0.214446 | 42.92 |
| 300173 | 2016 | -0.26 | 0.05 | 0.0066   | 0.00004356 | 21.62005 | 0.045286 | 21.21 |
| 2543   | 2016 | -0.64 | 0.05 | 0.0066   | 0.00004356 | 22.35063 | 0.147211 | 38.25 |
| 600499 | 2016 | -0.07 | 0.05 | 0.0066   | 0.00004356 | 22.855   | 0.067257 | 12.33 |
| 973    | 2016 | 0.317 | 0.05 | 0.0066   | 0.00004356 | 22.30674 | 0.063982 | 26.01 |
| 2054   | 2016 | 0.724 | 0.05 | 0.0066   | 0.00004356 | 21.80282 | 0.085837 | 21.93 |
| 2676   | 2016 | -0.71 | 0.05 | 0.0066   | 0.00004356 | 21.30125 | 0.026893 | 29    |
| 2054   | 2016 | 0.724 | 0.05 | 0.0066   | 0.00004356 | 21.80282 | 0.085837 | 21.93 |
| 2295   | 2016 | -0.46 | 0.05 | 0.0066   | 0.00004356 | 21.15455 | 0.008573 | 15.4  |
| 600499 | 2016 | -0.49 | 0.05 | 0.0066   | 0.00004356 | 22.855   | 0.067257 | 12.33 |
| 600499 | 2016 | -0.2  | 0.05 | 0.0066   | 0.00004356 | 22.855   | 0.067257 | 12.33 |
| 333    | 2016 | 0.324 | 0.05 | 0.0066   | 0.00004356 | 25.74206 | 0.22996  | 34.75 |
| 2676   | 2016 | -0.3  | 0.05 | 0.0066   | 0.00004356 | 21.30125 | 0.026893 | 29    |
| 2054   | 2016 | 0.724 | 0.05 | 0.0066   | 0.00004356 | 21.80282 | 0.085837 | 21.93 |
| 921    | 2016 | -0.44 | 0.05 | 0.0066   | 0.00004356 | 23.6706  | 0.214446 | 42.92 |
| 967    | 2016 | -0.28 | 0.05 | 0.0066   | 0.00004356 | 22.51961 | 0.070946 | 32.23 |
| 333    | 2016 | -0.13 | 0.05 | 0.0066   | 0.00004356 | 25.74206 | 0.22996  | 34.75 |
| 2670   | 2016 | -0.55 | 0.05 | 0.0066   | 0.00004356 | 23.97869 | 0.043104 | 16.94 |
| 333    | 2016 | -0.26 | 0.05 | 0.0066   | 0.00004356 | 25.74206 | 0.22996  | 34.75 |
| 333    | 2016 | -0.05 | 0.05 | 0.0066   | 0.00004356 | 25.74206 | 0.22996  | 34.75 |
| 600499 | 2016 | -0.14 | 0.05 | 0.0066   | 0.00004356 | 22.855   | 0.067257 | 12.33 |
| 2076   | 2016 | -0.14 | 0.05 | 0.0066   | 0.00004356 | 21.23938 | 0.025974 | 32.94 |



|        |      |       |      |        |            |          |          |       |
|--------|------|-------|------|--------|------------|----------|----------|-------|
| 2543   | 2016 | -0.49 | 0.05 | 0.0066 | 0.00004356 | 22.35063 | 0.147211 | 38.25 |
| 2054   | 2016 | 0.724 | 0.05 | 0.0066 | 0.00004356 | 21.80282 | 0.085837 | 21.93 |
| 921    | 2016 | 0.486 | 0.05 | 0.0066 | 0.00004356 | 23.6706  | 0.214446 | 42.92 |
| 333    | 2016 | -0.02 | 0.05 | 0.0066 | 0.00004356 | 25.74206 | 0.22996  | 34.75 |
| 2449   | 2016 | -0.23 | 0.05 | 0.0066 | 0.00004356 | 22.45952 | 0.06008  | 12.9  |
| 2054   | 2016 | 0.724 | 0.05 | 0.0066 | 0.00004356 | 21.80282 | 0.085837 | 21.93 |
| 333    | 2016 | -0.05 | 0.05 | 0.0066 | 0.00004356 | 25.74206 | 0.22996  | 34.75 |
| 967    | 2016 | -0.06 | 0.05 | 0.0066 | 0.00004356 | 22.51961 | 0.070946 | 32.23 |
| 973    | 2016 | -0.13 | 0.05 | 0.0066 | 0.00004356 | 22.30674 | 0.063982 | 26.01 |
| 973    | 2016 | 0.096 | 0.05 | 0.0066 | 0.00004356 | 22.30674 | 0.063982 | 26.01 |
| 921    | 2016 | -0.11 | 0.05 | 0.0066 | 0.00004356 | 23.6706  | 0.214446 | 42.92 |
| 2446   | 2016 | -0.21 | 0.05 | 0.0066 | 0.00004356 | 21.71599 | 0.06664  | 18    |
| 603288 | 2016 | -0.17 | 0.05 | 0.0066 | 0.00004356 | 23.32326 | 0.283922 | 58.16 |
| 533    | 2016 | -0.07 | 0.05 | 0.0066 | 0.00004356 | 21.90464 | 0.127014 | 17.37 |
| 300004 | 2016 | 0.759 | 0.05 | 0.0066 | 0.00004356 | 22.06519 | 0.027454 | 12.37 |
| 2676   | 2016 | -0.71 | 0.05 | 0.0066 | 0.00004356 | 21.30125 | 0.026893 | 29    |
| 2705   | 2016 | -0.68 | 0.05 | 0.0066 | 0.00004356 | 22.33624 | 0.162419 | 46.2  |
| 2666   | 2016 | -0.02 | 0.05 | 0.0066 | 0.00004356 | 21.94318 | 0.052608 | 37.54 |
| 603288 | 2016 | -0.19 | 0.05 | 0.0066 | 0.00004356 | 23.32326 | 0.283922 | 58.16 |
| 333    | 2016 | -0.1  | 0.05 | 0.0066 | 0.00004356 | 25.74206 | 0.22996  | 34.75 |
| 2054   | 2016 | 0.724 | 0.05 | 0.0066 | 0.00004356 | 21.80282 | 0.085837 | 21.93 |
| 600499 | 2016 | -0.38 | 0.05 | 0.0066 | 0.00004356 | 22.855   | 0.067257 | 12.33 |
| 300173 | 2016 | -0.23 | 0.05 | 0.0066 | 0.00004356 | 21.62005 | 0.045286 | 21.21 |
| 2543   | 2016 | -0.33 | 0.05 | 0.0066 | 0.00004356 | 22.35063 | 0.147211 | 38.25 |
| 600499 | 2016 | -0.49 | 0.05 | 0.0066 | 0.00004356 | 22.855   | 0.067257 | 12.33 |
| 533    | 2016 | -0.64 | 0.05 | 0.0066 | 0.00004356 | 21.90464 | 0.127014 | 17.37 |
| 600499 | 2016 | -0.09 | 0.05 | 0.0066 | 0.00004356 | 22.855   | 0.067257 | 12.33 |
| 2543   | 2016 | -0.51 | 0.05 | 0.0066 | 0.00004356 | 22.35063 | 0.147211 | 38.25 |
| 921    | 2016 | -0.26 | 0.05 | 0.0066 | 0.00004356 | 23.6706  | 0.214446 | 42.92 |
| 333    | 2016 | -0.14 | 0.05 | 0.0066 | 0.00004356 | 25.74206 | 0.22996  | 34.75 |
| 600499 | 2016 | -0.49 | 0.05 | 0.0066 | 0.00004356 | 22.855   | 0.067257 | 12.33 |
| 333    | 2016 | -0.17 | 0.05 | 0.0066 | 0.00004356 | 25.74206 | 0.22996  | 34.75 |
| 2676   | 2016 | -0.71 | 0.05 | 0.0066 | 0.00004356 | 21.30125 | 0.026893 | 29    |
| 300004 | 2016 | -0.03 | 0.05 | 0.0066 | 0.00004356 | 22.06519 | 0.027454 | 12.37 |
| 2543   | 2016 | -0.28 | 0.05 | 0.0066 | 0.00004356 | 22.35063 | 0.147211 | 38.25 |
| 333    | 2016 | -0.1  | 0.05 | 0.0066 | 0.00004356 | 25.74206 | 0.22996  | 34.75 |
| 333    | 2016 | -0.19 | 0.05 | 0.0066 | 0.00004356 | 25.74206 | 0.22996  | 34.75 |
| 300173 | 2016 | 0.038 | 0.05 | 0.0066 | 0.00004356 | 21.31453 | 0.045286 | 21.21 |
| 2260   | 2016 | 0.409 | 0.05 | 0.0066 | 0.00004356 | 20.71605 | 0.015298 | 24.66 |
| 2076   | 2016 | 0.023 | 0.05 | 0.0066 | 0.00004356 | 21.23938 | 0.025974 | 32.94 |
| 921    | 2016 | 0.066 | 0.05 | 0.0066 | 0.00004356 | 23.6706  | 0.214446 | 42.92 |
| 921    | 2016 | -0.11 | 0.05 | 0.0066 | 0.00004356 | 23.6706  | 0.214446 | 42.92 |
| 300464 | 2016 | -0.2  | 0.05 | 0.0066 | 0.00004356 | 20.54152 | 0.082292 | 50.4  |
| 2295   | 2016 | -0.46 | 0.05 | 0.0066 | 0.00004356 | 21.15455 | 0.008573 | 15.4  |
| 300417 | 2016 | 0.192 | 0.05 | 0.0066 | 0.00004356 | 20.10336 | 0.090459 | 15.32 |
| 300415 | 2016 | -0.26 | 0.05 | 0.0066 | 0.00004356 | 21.31445 | 0.131622 | 33.75 |
| 2260   | 2016 | 0.409 | 0.05 | 0.0066 | 0.00004356 | 20.71605 | 0.015298 | 24.66 |
| 2295   | 2016 | 0.862 | 0.05 | 0.0066 | 0.00004356 | 21.15455 | 0.008573 | 15.4  |
| 300004 | 2016 | 0.759 | 0.05 | 0.0066 | 0.00004356 | 22.06519 | 0.027454 | 12.37 |
| 300464 | 2016 | -0.6  | 0.05 | 0.0066 | 0.00004356 | 20.54152 | 0.082292 | 50.4  |
| 2449   | 2016 | -0.43 | 0.05 | 0.0066 | 0.00004356 | 22.45952 | 0.06008  | 12.9  |
| 2076   | 2016 | 0.062 | 0.05 | 0.0066 | 0.00004356 | 21.23938 | 0.025974 | 32.94 |
| 2543   | 2016 | -0.43 | 0.05 | 0.0066 | 0.00004356 | 21.99579 | 0.147211 | 38.25 |
| 333    | 2016 | -0.1  | 0.05 | 0.0066 | 0.00004356 | 25.74206 | 0.22996  | 34.75 |

|        |      |       |      |        |            |          |          |       |
|--------|------|-------|------|--------|------------|----------|----------|-------|
| 2711   | 2016 | -0.44 | 0.05 | 0.0066 | 0.00004356 | 21.86135 | 0.158378 | 52.41 |
| 541    | 2016 | -0.65 | 0.05 | 0.0066 | 0.00004356 | 22.53158 | 0.214417 | 13.47 |
| 300415 | 2016 | -0.37 | 0.05 | 0.0066 | 0.00004356 | 21.31445 | 0.131622 | 33.75 |
| 300415 | 2016 | -0.35 | 0.05 | 0.0066 | 0.00004356 | 20.92634 | 0.131622 | 33.75 |
| 333    | 2016 | -0.26 | 0.05 | 0.0066 | 0.00004356 | 25.74206 | 0.22996  | 34.75 |
| 600499 | 2016 | -0.27 | 0.05 | 0.0066 | 0.00004356 | 22.855   | 0.067257 | 12.33 |
| 333    | 2016 | 0.112 | 0.05 | 0.0066 | 0.00004356 | 25.74206 | 0.22996  | 34.75 |
| 921    | 2016 | -0.01 | 0.05 | 0.0066 | 0.00004356 | 23.6706  | 0.214446 | 42.92 |
| 921    | 2016 | -0.6  | 0.05 | 0.0066 | 0.00004356 | 23.6706  | 0.214446 | 42.92 |
| 2260   | 2016 | 0.404 | 0.05 | 0.0066 | 0.00004356 | 20.71605 | 0.015298 | 24.66 |
| 600499 | 2016 | -0.47 | 0.05 | 0.0066 | 0.00004356 | 22.4503  | 0.067257 | 12.33 |
| 967    | 2016 | -0.06 | 0.05 | 0.0066 | 0.00004356 | 22.51961 | 0.070946 | 32.23 |
| 300415 | 2016 | -0.3  | 0.05 | 0.0066 | 0.00004356 | 21.31445 | 0.131622 | 33.75 |
| 333    | 2016 | 0.063 | 0.05 | 0.0066 | 0.00004356 | 25.74206 | 0.22996  | 34.75 |
| 973    | 2016 | 0.317 | 0.05 | 0.0066 | 0.00004356 | 22.00234 | 0.063982 | 26.01 |
| 333    | 2016 | 0.387 | 0.05 | 0.0066 | 0.00004356 | 25.74206 | 0.22996  | 34.75 |
| 2705   | 2016 | -0.35 | 0.05 | 0.0066 | 0.00004356 | 22.41615 | 0.162419 | 46.2  |
| 2666   | 2016 | 0.788 | 0.05 | 0.0066 | 0.00004356 | 21.94318 | 0.052608 | 37.54 |
| 600499 | 2016 | -0.6  | 0.05 | 0.0066 | 0.00004356 | 22.855   | 0.067257 | 12.33 |
| 333    | 2016 | -0.26 | 0.05 | 0.0066 | 0.00004356 | 25.74206 | 0.22996  | 34.75 |
| 2705   | 2016 | -0.02 | 0.05 | 0.0066 | 0.00004356 | 22.41615 | 0.162419 | 46.2  |
| 2054   | 2016 | -0.6  | 0.05 | 0.0066 | 0.00004356 | 21.60943 | 0.085837 | 21.93 |
| 967    | 2016 | -0.28 | 0.05 | 0.0066 | 0.00004356 | 22.51961 | 0.070946 | 32.23 |
| 921    | 2016 | -0.29 | 0.05 | 0.0066 | 0.00004356 | 23.6706  | 0.214446 | 42.92 |
| 973    | 2016 | -0.3  | 0.05 | 0.0066 | 0.00004356 | 22.30674 | 0.063982 | 26.01 |
| 533    | 2016 | -0.64 | 0.05 | 0.0066 | 0.00004356 | 21.90464 | 0.127014 | 17.37 |
| 300415 | 2016 | -0.14 | 0.05 | 0.0066 | 0.00004356 | 21.31445 | 0.131622 | 33.75 |
| 300173 | 2016 | -0.34 | 0.05 | 0.0066 | 0.00004356 | 21.62005 | 0.045286 | 21.21 |
| 300417 | 2016 | 0.192 | 0.05 | 0.0066 | 0.00004356 | 20.10336 | 0.090459 | 15.32 |
| 600499 | 2016 | -0.47 | 0.05 | 0.0066 | 0.00004356 | 22.855   | 0.067257 | 12.33 |
| 2076   | 2016 | -0.2  | 0.05 | 0.0066 | 0.00004356 | 21.23938 | 0.025974 | 32.94 |
| 603288 | 2016 | -0.17 | 0.05 | 0.0066 | 0.00004356 | 23.32326 | 0.283922 | 58.16 |
| 603288 | 2016 | -0.21 | 0.05 | 0.0066 | 0.00004356 | 23.32326 | 0.283922 | 58.16 |
| 2543   | 2016 | -0.33 | 0.05 | 0.0066 | 0.00004356 | 22.35063 | 0.147211 | 38.25 |
| 2705   | 2016 | -0.59 | 0.05 | 0.0066 | 0.00004356 | 22.41615 | 0.162419 | 46.2  |
| 2705   | 2016 | -0.35 | 0.05 | 0.0066 | 0.00004356 | 22.41615 | 0.162419 | 46.2  |
| 541    | 2016 | -0.64 | 0.05 | 0.0066 | 0.00004356 | 22.53158 | 0.214417 | 13.47 |
| 541    | 2016 | -0.64 | 0.05 | 0.0066 | 0.00004356 | 22.53158 | 0.214417 | 13.47 |
| 2295   | 2016 | -0.46 | 0.05 | 0.0066 | 0.00004356 | 20.77377 | 0.008573 | 15.4  |
| 603288 | 2016 | -0.19 | 0.05 | 0.0066 | 0.00004356 | 23.32326 | 0.283922 | 58.16 |
| 2054   | 2016 | 0.724 | 0.05 | 0.0066 | 0.00004356 | 21.80282 | 0.085837 | 21.93 |
| 2054   | 2016 | 0.559 | 0.05 | 0.0066 | 0.00004356 | 21.80282 | 0.085837 | 21.93 |
| 300415 | 2016 | -0.26 | 0.05 | 0.0066 | 0.00004356 | 21.31445 | 0.131622 | 33.75 |
| 967    | 2016 | -0.06 | 0.05 | 0.0066 | 0.00004356 | 22.51961 | 0.070946 | 32.23 |
| 600499 | 2016 | -0    | 0.05 | 0.0066 | 0.00004356 | 22.855   | 0.067257 | 12.33 |
| 921    | 2016 | -0.31 | 0.05 | 0.0066 | 0.00004356 | 23.6706  | 0.214446 | 42.92 |
| 2705   | 2016 | -0.34 | 0.05 | 0.0066 | 0.00004356 | 22.41615 | 0.162419 | 46.2  |
| 2711   | 2016 | -0.44 | 0.05 | 0.0066 | 0.00004356 | 21.5072  | 0.158378 | 52.41 |
| 2611   | 2016 | -0.26 | 0.05 | 0.0066 | 0.00004356 | 21.84674 | 0.074889 | 34.15 |
| 973    | 2016 | 0.027 | 0.05 | 0.0066 | 0.00004356 | 22.30674 | 0.063982 | 26.01 |
| 2446   | 2016 | -0.17 | 0.05 | 0.0066 | 0.00004356 | 21.90535 | 0.06664  | 18    |
| 533    | 2016 | -0.13 | 0.05 | 0.0066 | 0.00004356 | 21.90464 | 0.127014 | 17.37 |
| 333    | 2016 | -0.25 | 0.05 | 0.0066 | 0.00004356 | 25.74206 | 0.22996  | 34.75 |
| 2260   | 2016 | 0.063 | 0.05 | 0.0066 | 0.00004356 | 20.70792 | 0.015298 | 24.66 |

|        |      |       |      |        |            |          |          |       |
|--------|------|-------|------|--------|------------|----------|----------|-------|
| 2666   | 2016 | -0.02 | 0.05 | 0.0066 | 0.00004356 | 21.94318 | 0.052608 | 37.54 |
| 300417 | 2016 | 0.192 | 0.05 | 0.0066 | 0.00004356 | 20.10336 | 0.090459 | 15.32 |
| 533    | 2016 | -0.15 | 0.05 | 0.0066 | 0.00004356 | 21.90464 | 0.127014 | 17.37 |
| 2449   | 2016 | 0.312 | 0.05 | 0.0066 | 0.00004356 | 22.40901 | 0.06008  | 12.9  |
| 300415 | 2016 | -0.29 | 0.05 | 0.0066 | 0.00004356 | 21.31445 | 0.131622 | 33.75 |
| 533    | 2016 | -0.15 | 0.05 | 0.0066 | 0.00004356 | 21.90464 | 0.127014 | 17.37 |
| 333    | 2016 | -0.13 | 0.05 | 0.0066 | 0.00004356 | 25.74206 | 0.22996  | 34.75 |
| 300417 | 2016 | 0.192 | 0.05 | 0.0066 | 0.00004356 | 20.10336 | 0.090459 | 15.32 |
| 333    | 2016 | -0.26 | 0.05 | 0.0066 | 0.00004356 | 25.74206 | 0.22996  | 34.75 |
| 2676   | 2016 | 0.553 | 0.05 | 0.0066 | 0.00004356 | 21.30125 | 0.026893 | 29    |
| 2446   | 2016 | -0.03 | 0.05 | 0.0066 | 0.00004356 | 21.90535 | 0.06664  | 18    |
| 300004 | 2016 | -0.32 | 0.05 | 0.0066 | 0.00004356 | 21.94589 | 0.027454 | 12.37 |
| 333    | 2016 | -0.1  | 0.05 | 0.0066 | 0.00004356 | 25.74206 | 0.22996  | 34.75 |
| 2054   | 2016 | 0.724 | 0.05 | 0.0066 | 0.00004356 | 21.80282 | 0.085837 | 21.93 |
| 2676   | 2016 | -0.3  | 0.05 | 0.0066 | 0.00004356 | 21.30125 | 0.026893 | 29    |
| 2676   | 2016 | -0.59 | 0.05 | 0.0066 | 0.00004356 | 21.30125 | 0.026893 | 29    |
| 300173 | 2016 | -0.31 | 0.05 | 0.0066 | 0.00004356 | 21.62005 | 0.045286 | 21.21 |
| 333    | 2016 | -0.1  | 0.05 | 0.0066 | 0.00004356 | 25.74206 | 0.22996  | 34.75 |
| 2611   | 2016 | -0.06 | 0.05 | 0.0066 | 0.00004356 | 21.84674 | 0.074889 | 34.15 |
| 300004 | 2016 | -0.32 | 0.05 | 0.0066 | 0.00004356 | 22.06519 | 0.027454 | 12.37 |
| 333    | 2016 | 0.411 | 0.05 | 0.0066 | 0.00004356 | 25.74206 | 0.22996  | 34.75 |
| 2670   | 2016 | -0.55 | 0.05 | 0.0066 | 0.00004356 | 23.97869 | 0.043104 | 16.94 |
| 2076   | 2016 | 0.062 | 0.05 | 0.0066 | 0.00004356 | 21.23938 | 0.025974 | 32.94 |
| 921    | 2016 | -0.29 | 0.05 | 0.0066 | 4.36E-05   | 23.6706  | 0.214446 | 42.92 |
| 541    | 2016 | -0.79 | 0.05 | 0.0066 | 4.36E-05   | 22.53158 | 0.214417 | 13.47 |
| 333    | 2016 | -0.26 | 0.05 | 0.0066 | 4.36E-05   | 25.74206 | 0.22996  | 34.75 |
| 2611   | 2016 | -0.22 | 0.05 | 0.0066 | 4.36E-05   | 21.84674 | 0.074889 | 34.15 |
| 2449   | 2016 | 0.312 | 0.05 | 0.0066 | 4.36E-05   | 22.45952 | 0.06008  | 12.9  |
| 967    | 2016 | -0.26 | 0.05 | 0.0066 | 0.00004356 | 22.51961 | 0.070946 | 32.23 |
| 2705   | 2016 | -0.59 | 0.05 | 0.0066 | 0.00004356 | 22.41615 | 0.162419 | 46.2  |
| 333    | 2016 | -0.31 | 0.05 | 0.0066 | 0.00004356 | 25.74206 | 0.22996  | 34.75 |
| 2666   | 2016 | -0.02 | 0.05 | 0.0066 | 0.00004356 | 21.94318 | 0.052608 | 37.54 |
| 300464 | 2016 | -0.6  | 0.05 | 0.0066 | 0.00004356 | 20.54152 | 0.082292 | 50.4  |
| 333    | 2016 | -0.17 | 0.05 | 0.0066 | 0.00004356 | 25.74206 | 0.22996  | 34.75 |
| 973    | 2016 | 0.077 | 0.05 | 0.0066 | 0.00004356 | 22.30674 | 0.063982 | 26.01 |
| 2670   | 2016 | -0.53 | 0.05 | 0.0066 | 0.00004356 | 23.37013 | 0.043104 | 16.94 |
| 2670   | 2016 | -0.5  | 0.05 | 0.0066 | 0.00004356 | 23.97869 | 0.043104 | 16.94 |
| 2446   | 2016 | 0.054 | 0.05 | 0.0066 | 0.00004356 | 21.90535 | 0.06664  | 18    |
| 967    | 2016 | -0.06 | 0.05 | 0.0066 | 0.00004356 | 22.51961 | 0.070946 | 32.23 |
| 333    | 2016 | -0.1  | 0.05 | 0.0066 | 0.00004356 | 25.74206 | 0.22996  | 34.75 |
| 300004 | 2016 | -0.32 | 0.05 | 0.0066 | 0.00004356 | 22.06519 | 0.027454 | 12.37 |
| 333    | 2016 | -0.3  | 0.05 | 0.0066 | 0.00004356 | 25.74206 | 0.22996  | 34.75 |
| 2054   | 2016 | 0.559 | 0.05 | 0.0066 | 0.00004356 | 21.80282 | 0.085837 | 21.93 |
| 2076   | 2016 | 0.526 | 0.05 | 0.0066 | 0.00004356 | 21.23938 | 0.025974 | 32.94 |
| 600499 | 2016 | -0.21 | 0.05 | 0.0066 | 0.00004356 | 22.855   | 0.067257 | 12.33 |
| 973    | 2016 | 0.317 | 0.05 | 0.0066 | 0.00004356 | 22.30674 | 0.063982 | 26.01 |
| 973    | 2016 | 0.194 | 0.05 | 0.0066 | 0.00004356 | 22.30674 | 0.063982 | 26.01 |
| 973    | 2016 | 0.537 | 0.05 | 0.0066 | 0.00004356 | 22.30674 | 0.063982 | 26.01 |
| 2676   | 2016 | -0.71 | 0.05 | 0.0066 | 0.00004356 | 21.30125 | 0.026893 | 29    |
| 973    | 2016 | 0.537 | 0.05 | 0.0066 | 0.00004356 | 22.30674 | 0.063982 | 26.01 |
| 2670   | 2016 | -0.55 | 0.05 | 0.0066 | 0.00004356 | 23.97869 | 0.043104 | 16.94 |
| 2666   | 2016 | -0.43 | 0.05 | 0.0066 | 0.00004356 | 21.94318 | 0.052608 | 37.54 |
| 921    | 2016 | 0.158 | 0.05 | 0.0066 | 0.00004356 | 23.6706  | 0.214446 | 42.92 |
| 2295   | 2016 | 0.862 | 0.05 | 0.0066 | 0.00004356 | 21.15455 | 0.008573 | 15.4  |

|        |      |       |      |        |            |          |          |       |
|--------|------|-------|------|--------|------------|----------|----------|-------|
| 2611   | 2016 | -0.25 | 0.05 | 0.0066 | 0.00004356 | 21.84674 | 0.074889 | 34.15 |
| 967    | 2016 | -0.06 | 0.05 | 0.0066 | 0.00004356 | 22.51961 | 0.070946 | 32.23 |
| 2054   | 2016 | 0.559 | 0.05 | 0.0066 | 0.00004356 | 21.80282 | 0.085837 | 21.93 |
| 921    | 2016 | 0.158 | 0.05 | 0.0066 | 0.00004356 | 23.6706  | 0.214446 | 42.92 |
| 2446   | 2016 | 0.259 | 0.05 | 0.0066 | 0.00004356 | 21.90535 | 0.06664  | 18    |
| 2676   | 2016 | -0.39 | 0.05 | 0.0066 | 0.00004356 | 21.30125 | 0.026893 | 29    |
| 300173 | 2016 | 0.038 | 0.05 | 0.0066 | 0.00004356 | 21.62005 | 0.045286 | 21.21 |
| 2446   | 2016 | 0.259 | 0.05 | 0.0066 | 0.00004356 | 21.90535 | 0.06664  | 18    |
| 333    | 2016 | -0.1  | 0.05 | 0.0066 | 0.00004356 | 25.74206 | 0.22996  | 34.75 |
| 600499 | 2016 | -0.49 | 0.05 | 0.0066 | 0.00004356 | 22.855   | 0.067257 | 12.33 |
| 2260   | 2016 | 0.409 | 0.05 | 0.0066 | 0.00004356 | 20.71605 | 0.015298 | 24.66 |
| 300173 | 2016 | -0.24 | 0.05 | 0.0066 | 0.00004356 | 21.62005 | 0.045286 | 21.21 |
| 2076   | 2016 | 0.075 | 0.05 | 0.0066 | 0.00004356 | 21.23938 | 0.025974 | 32.94 |
| 2446   | 2016 | 0.259 | 0.05 | 0.0066 | 0.00004356 | 21.90535 | 0.06664  | 18    |
| 300173 | 2016 | -0.46 | 0.05 | 0.0066 | 0.00004356 | 21.62005 | 0.045286 | 21.21 |
| 2054   | 2016 | -0.6  | 0.05 | 0.0066 | 0.00004356 | 21.80282 | 0.085837 | 21.93 |
| 333    | 2016 | 0.132 | 0.05 | 0.0066 | 0.00004356 | 25.74206 | 0.22996  | 34.75 |
| 300173 | 2016 | 0.038 | 0.05 | 0.0066 | 0.00004356 | 21.62005 | 0.045286 | 21.21 |
| 600499 | 2016 | 0.065 | 0.05 | 0.0066 | 0.00004356 | 22.855   | 0.067257 | 12.33 |
| 2611   | 2016 | -0.26 | 0.05 | 0.0066 | 0.00004356 | 21.84674 | 0.074889 | 34.15 |
| 541    | 2016 | -0.79 | 0.05 | 0.0066 | 0.00004356 | 22.53158 | 0.214417 | 13.47 |
| 973    | 2016 | 0.194 | 0.05 | 0.0066 | 0.00004356 | 22.30674 | 0.063982 | 26.01 |
| 333    | 2016 | -0.66 | 0.05 | 0.0066 | 0.00004356 | 25.74206 | 0.22996  | 34.75 |
| 300004 | 2016 | -0.23 | 0.05 | 0.0066 | 0.00004356 | 22.06519 | 0.027454 | 12.37 |
| 2260   | 2016 | 0.063 | 0.05 | 0.0066 | 0.00004356 | 20.71605 | 0.015298 | 24.66 |
| 921    | 2016 | -0.11 | 0.05 | 0.0066 | 0.00004356 | 23.6706  | 0.214446 | 42.92 |
| 333    | 2016 | -0.1  | 0.05 | 0.0066 | 0.00004356 | 25.74206 | 0.22996  | 34.75 |
| 2705   | 2016 | -0.17 | 0.05 | 0.0066 | 0.00004356 | 22.41615 | 0.162419 | 46.2  |
| 600499 | 2016 | -0.16 | 0.05 | 0.0066 | 0.00004356 | 22.855   | 0.067257 | 12.33 |
| 333    | 2016 | 0.668 | 0.05 | 0.0066 | 0.00004356 | 25.74206 | 0.22996  | 34.75 |
| 333    | 2016 | -0.26 | 0.05 | 0.0066 | 0.00004356 | 25.74206 | 0.22996  | 34.75 |
| 2076   | 2016 | -0.2  | 0.05 | 0.0066 | 0.00004356 | 20.93312 | 0.025974 | 32.94 |
| 921    | 2016 | -0.11 | 0.05 | 0.0066 | 0.00004356 | 23.6706  | 0.214446 | 42.92 |
| 2666   | 2016 | -0.02 | 0.05 | 0.0066 | 0.00004356 | 21.94318 | 0.052608 | 37.54 |
| 2666   | 2016 | -0.02 | 0.05 | 0.0066 | 0.00004356 | 21.61359 | 0.052608 | 37.54 |
| 333    | 2016 | -0.1  | 0.05 | 0.0066 | 0.00004356 | 25.74206 | 0.22996  | 34.75 |
| 333    | 2016 | -0.06 | 0.05 | 0.0066 | 0.00004356 | 25.14296 | 0.22996  | 34.75 |
| 2295   | 2016 | -0.46 | 0.05 | 0.0066 | 0.00004356 | 21.15455 | 0.008573 | 15.4  |
| 2449   | 2016 | -0.43 | 0.05 | 0.0066 | 0.00004356 | 22.45952 | 0.06008  | 12.9  |
| 2611   | 2016 | -0.51 | 0.05 | 0.0066 | 0.00004356 | 21.84674 | 0.074889 | 34.15 |
| 2705   | 2016 | -0.59 | 0.05 | 0.0066 | 0.00004356 | 22.41615 | 0.162419 | 46.2  |
| 921    | 2016 | -0.11 | 0.05 | 0.0066 | 0.00004356 | 23.6706  | 0.214446 | 42.92 |
| 333    | 2016 | -0.14 | 0.05 | 0.0066 | 0.00004356 | 25.74206 | 0.22996  | 34.75 |
| 2711   | 2016 | -0.44 | 0.05 | 0.0066 | 0.00004356 | 21.86135 | 0.158378 | 52.41 |
| 2076   | 2016 | -0.2  | 0.05 | 0.0066 | 0.00004356 | 21.23938 | 0.025974 | 32.94 |
| 921    | 2016 | -0.19 | 0.05 | 0.0066 | 0.00004356 | 23.6706  | 0.214446 | 42.92 |
| 2666   | 2016 | -0.02 | 0.05 | 0.0066 | 0.00004356 | 21.94318 | 0.052608 | 37.54 |
| 973    | 2016 | 0.317 | 0.05 | 0.0066 | 0.00004356 | 22.30674 | 0.063982 | 26.01 |
| 600499 | 2016 | -0.49 | 0.05 | 0.0066 | 0.00004356 | 22.855   | 0.067257 | 12.33 |
| 967    | 2016 | -0.06 | 0.05 | 0.0066 | 0.00004356 | 22.51961 | 0.070946 | 32.23 |
| 333    | 2016 | -0.21 | 0.05 | 0.0066 | 0.00004356 | 25.74206 | 0.22996  | 34.75 |
| 603288 | 2016 | -0.18 | 0.05 | 0.0066 | 0.00004356 | 23.14218 | 0.283922 | 58.16 |
| 541    | 2016 | -0.64 | 0.05 | 0.0066 | 0.00004356 | 22.5606  | 0.214417 | 13.47 |
| 333    | 2016 | -0.49 | 0.05 | 0.0066 | 0.00004356 | 25.74206 | 0.22996  | 34.75 |

|        |      |       |      |          |            |          |          |       |
|--------|------|-------|------|----------|------------|----------|----------|-------|
| 333    | 2016 | -0.16 | 0.05 | 0.0066   | 0.00004356 | 25.74206 | 0.22996  | 34.75 |
| 2054   | 2016 | 0.559 | 0.05 | 0.0066   | 0.00004356 | 21.80282 | 0.085837 | 21.93 |
| 2705   | 2016 | -0.59 | 0.05 | 0.0066   | 0.00004356 | 22.41615 | 0.162419 | 46.2  |
| 2076   | 2016 | 0.105 | 0.05 | 0.0066   | 0.00004356 | 21.23938 | 0.025974 | 32.94 |
| 333    | 2016 | -0.66 | 0.05 | 0.0066   | 0.00004356 | 25.74206 | 0.22996  | 34.75 |
| 333    | 2016 | -0.22 | 0.05 | 0.0066   | 0.00004356 | 25.74206 | 0.22996  | 34.75 |
| 973    | 2016 | -0.02 | 0.05 | 0.0066   | 0.00004356 | 22.30674 | 0.063982 | 26.01 |
| 603288 | 2016 | -0.17 | 0.05 | 0.0066   | 0.00004356 | 23.32326 | 0.283922 | 58.16 |
| 300173 | 2016 | 0.038 | 0.05 | 0.0066   | 0.00004356 | 21.62005 | 0.045286 | 21.21 |
| 2295   | 2016 | -0.3  | 0.05 | 0.0066   | 0.00004356 | 21.15455 | 0.008573 | 15.4  |
| 300417 | 2016 | 0.192 | 0.05 | 0.0066   | 0.00004356 | 20.10336 | 0.090459 | 15.32 |
| 333    | 2016 | -0.14 | 0.05 | 0.0066   | 0.00004356 | 25.74206 | 0.22996  | 34.75 |
| 2676   | 2016 | -0.71 | 0.05 | 0.0066   | 0.00004356 | 21.23451 | 0.026893 | 29    |
| 333    | 2016 | -0.18 | 0.05 | 0.0066   | 0.00004356 | 25.74206 | 0.22996  | 34.75 |
| 300464 | 2016 | -0.29 | 0.05 | 0.0066   | 0.00004356 | 20.54152 | 0.082292 | 50.4  |
| 2054   | 2016 | 0.559 | 0.05 | 0.0066   | 0.00004356 | 21.80282 | 0.085837 | 21.93 |
| 300004 | 2016 | -0.23 | 0.05 | 0.0066   | 0.00004356 | 22.06519 | 0.027454 | 12.37 |
| 967    | 2016 | -0.26 | 0.05 | 0.0066   | 0.00004356 | 22.15741 | 0.070946 | 32.23 |
| 2611   | 2016 | -0.38 | 0.05 | 0.0066   | 0.00004356 | 21.29934 | 0.074889 | 34.15 |
| 533    | 2016 | -0.34 | 0.05 | 0.0066   | 0.00004356 | 21.07648 | 0.127014 | 17.37 |
| 921    | 2016 | -0.84 | 0.05 | 0.0066   | 0.00004356 | 23.6706  | 0.214446 | 42.92 |
| 967    | 2016 | -0.06 | 0.05 | 0.0066   | 0.00004356 | 22.51961 | 0.070946 | 32.23 |
| 2543   | 2016 | -0.47 | 0.05 | 0.0066   | 0.00004356 | 22.35063 | 0.147211 | 38.25 |
| 2670   | 2016 | -0.53 | 0.05 | 0.0066   | 0.00004356 | 23.97869 | 0.043104 | 16.94 |
| 2611   | 2016 | -0.34 | 0.05 | 0.0066   | 0.00004356 | 21.84674 | 0.074889 | 34.15 |
| 2054   | 2016 | 0.227 | 0.05 | 0.0066   | 0.00004356 | 21.80282 | 0.085837 | 21.93 |
| 300464 | 2016 | -0.2  | 0.05 | 0.0066   | 0.00004356 | 20.52785 | 0.082292 | 50.4  |
| 333    | 2016 | -0.49 | 0.05 | 0.0066   | 0.00004356 | 25.74206 | 0.22996  | 34.75 |
| 300173 | 2016 | 0.038 | 0.05 | 0.0066   | 0.00004356 | 21.62005 | 0.045286 | 21.21 |
| 922    | 2016 | -0.56 | 0.02 | 0.842109 | 0.70914804 | 21.75527 | -0.3046  | 24.12 |
| 922    | 2016 | -0.21 | 0.02 | 0.842109 | 0.70914804 | 21.64317 | -0.3046  | 24.12 |
| 922    | 2016 | -0.28 | 0.02 | 0.842109 | 0.70914804 | 21.75527 | -0.3046  | 24.12 |
| 922    | 2016 | -0.28 | 0.02 | 0.842109 | 0.70914804 | 21.75527 | -0.3046  | 24.12 |
| 600480 | 2016 | -0.16 | 0    | 1.598984 | 2.5567481  | 23.02731 | 0.07929  | 34.71 |
| 600480 | 2016 | -0.59 | 0    | 1.598984 | 2.5567481  | 23.02731 | 0.07929  | 34.71 |
| 600480 | 2016 | -0.59 | 0    | 1.598984 | 2.5567481  | 23.02731 | 0.07929  | 34.71 |
| 600482 | 2016 | -0.13 | 0    | 1.598984 | 2.5567481  | 24.40006 | 0.043316 | 26.15 |
| 600135 | 2016 | -0.03 | 0    | 1.598984 | 2.5567481  | 21.44502 | 0.027383 | 34.11 |
| 687    | 2016 | 0.579 | 0    | 1.598984 | 2.5567481  | 22.09485 | 0.114524 | 29.8  |
| 600480 | 2016 | -0.44 | 0    | 1.598984 | 2.5567481  | 23.02731 | 0.07929  | 34.71 |
| 600480 | 2016 | -0.59 | 0    | 1.598984 | 2.5567481  | 23.02731 | 0.07929  | 34.71 |
| 600135 | 2016 | -0.21 | 0    | 1.598984 | 2.5567481  | 21.3536  | 0.027383 | 34.11 |
| 600482 | 2016 | -0.1  | 0    | 1.598984 | 2.5567481  | 24.40006 | 0.043316 | 26.15 |
| 600482 | 2016 | 0.065 | 0    | 1.598984 | 2.5567481  | 24.40006 | 0.043316 | 26.15 |
| 600135 | 2016 | -0.21 | 0    | 1.598984 | 2.5567481  | 21.44502 | 0.027383 | 34.11 |
| 600482 | 2016 | 0.42  | 0    | 1.598984 | 2.5567481  | 24.40006 | 0.043316 | 26.15 |
| 600482 | 2016 | 0.065 | 0    | 1.598984 | 2.5567481  | 24.40006 | 0.043316 | 26.15 |
| 600480 | 2016 | 0.319 | 0    | 1.598984 | 2.5567481  | 23.02731 | 0.07929  | 34.71 |
| 600480 | 2016 | -0.42 | 0    | 1.598984 | 2.5567481  | 23.02731 | 0.07929  | 34.71 |
| 600550 | 2016 | -0.31 | 0    | 1.598984 | 2.5567481  | 22.99046 | 0.172956 | 33.47 |
| 601633 | 2016 | 0.185 | 0    | 1.598984 | 2.5567481  | 25.19601 | 0.222875 | 56.04 |
| 601633 | 2016 | 0.724 | 0    | 1.598984 | 2.5567481  | 25.24841 | 0.222875 | 56.04 |
| 601633 | 2016 | -0.05 | 0    | 1.598984 | 2.5567481  | 25.24841 | 0.222875 | 56.04 |
| 600480 | 2016 | -0.59 | 0    | 1.598984 | 2.5567481  | 23.02731 | 0.07929  | 34.71 |

|        |      |       |   |          |           |          |          |       |
|--------|------|-------|---|----------|-----------|----------|----------|-------|
| 600480 | 2016 | -0.32 | 0 | 1.598984 | 2.5567481 | 23.02731 | 0.07929  | 34.71 |
| 300428 | 2016 | 0.675 | 0 | 1.598984 | 2.5567481 | 20.38798 | 0.112485 | 11.88 |
| 600550 | 2016 | 0.249 | 0 | 1.598984 | 2.5567481 | 22.99046 | 0.172956 | 33.47 |
| 600480 | 2016 | -0.59 | 0 | 1.598984 | 2.5567481 | 23.02731 | 0.07929  | 34.71 |
| 600482 | 2016 | 0.065 | 0 | 1.598984 | 2.5567481 | 24.40006 | 0.043316 | 26.15 |
| 600480 | 2016 | -0.39 | 0 | 1.598984 | 2.5567481 | 23.02731 | 0.07929  | 34.71 |
| 600482 | 2016 | 0.065 | 0 | 1.598984 | 2.5567481 | 24.40006 | 0.043316 | 26.15 |
| 600480 | 2016 | -0.26 | 0 | 1.598984 | 2.5567481 | 23.02731 | 0.07929  | 34.71 |
| 600480 | 2016 | -0.23 | 0 | 1.598984 | 2.5567481 | 23.02731 | 0.07929  | 34.71 |
| 300152 | 2016 | -0.21 | 0 | 1.598984 | 2.5567481 | 21.75929 | -0.27288 | 29.46 |
| 601633 | 2016 | 0.559 | 0 | 1.598984 | 2.5567481 | 25.24841 | 0.222875 | 56.04 |
| 600480 | 2016 | -0.59 | 0 | 1.598984 | 2.5567481 | 23.02731 | 0.07929  | 34.71 |
| 2342   | 2016 | -0.25 | 0 | 1.598984 | 2.5567481 | 22.12709 | 0.008528 | 20.03 |
| 601633 | 2016 | -0.11 | 0 | 1.598984 | 2.5567481 | 25.24841 | 0.222875 | 56.04 |
| 300446 | 2016 | 0.16  | 0 | 1.598984 | 2.5567481 | 20.11275 | 0.217111 | 30.61 |
| 2342   | 2016 | -0.25 | 0 | 1.598984 | 2.5567481 | 22.12709 | 0.008528 | 20.03 |
| 600480 | 2016 | -0.37 | 0 | 1.598984 | 2.5567481 | 23.02731 | 0.07929  | 34.71 |
| 600480 | 2016 | -0.37 | 0 | 1.598984 | 2.5567481 | 23.02731 | 0.07929  | 34.71 |
| 600550 | 2016 | -0.09 | 0 | 1.598984 | 2.5567481 | 22.99046 | 0.172956 | 33.47 |
| 600482 | 2016 | -0.25 | 0 | 1.598984 | 2.5567481 | 24.40006 | 0.043316 | 26.15 |
| 300446 | 2016 | 0.16  | 0 | 1.598984 | 2.5567481 | 20.11275 | 0.217111 | 30.61 |
| 600482 | 2016 | -0.13 | 0 | 1.598984 | 2.5567481 | 24.40006 | 0.043316 | 26.15 |
| 600550 | 2016 | -0.31 | 0 | 1.598984 | 2.5567481 | 22.99046 | 0.172956 | 33.47 |
| 600480 | 2016 | -0.59 | 0 | 1.598984 | 2.5567481 | 23.02731 | 0.07929  | 34.71 |
| 600482 | 2016 | 0.065 | 0 | 1.598984 | 2.5567481 | 24.40006 | 0.043316 | 26.15 |
| 300428 | 2016 | 0.675 | 0 | 1.598984 | 2.5567481 | 20.41168 | 0.112485 | 11.88 |
| 601633 | 2016 | -0.6  | 0 | 1.598984 | 2.5567481 | 25.24841 | 0.222875 | 56.04 |
| 300152 | 2016 | 0.123 | 0 | 1.598984 | 2.5567481 | 21.75929 | -0.27288 | 29.46 |
| 600482 | 2016 | 0.084 | 0 | 1.598984 | 2.5567481 | 24.40006 | 0.043316 | 26.15 |
| 600482 | 2016 | -0.08 | 0 | 1.598984 | 2.5567481 | 24.40006 | 0.043316 | 26.15 |
| 600550 | 2016 | -0.27 | 0 | 1.598984 | 2.5567481 | 22.99046 | 0.172956 | 33.47 |
| 600480 | 2016 | -0.37 | 0 | 1.598984 | 2.5567481 | 23.02731 | 0.07929  | 34.71 |
| 600482 | 2016 | -0.5  | 0 | 1.598984 | 2.5567481 | 24.40006 | 0.043316 | 26.15 |
| 600480 | 2016 | -0.32 | 0 | 1.598984 | 2.5567481 | 23.02731 | 0.07929  | 34.71 |
| 2342   | 2016 | -0.25 | 0 | 1.598984 | 2.5567481 | 22.12709 | 0.008528 | 20.03 |
| 600482 | 2016 | 0.089 | 0 | 1.598984 | 2.5567481 | 24.40006 | 0.043316 | 26.15 |
| 600482 | 2016 | -0.07 | 0 | 1.598984 | 2.5567481 | 24.40006 | 0.043316 | 26.15 |
| 300152 | 2016 | -0.21 | 0 | 1.598984 | 2.5567481 | 21.75929 | -0.27288 | 29.46 |
| 600550 | 2016 | -0.34 | 0 | 1.598984 | 2.5567481 | 22.99046 | 0.172956 | 33.47 |
| 600482 | 2016 | 0.065 | 0 | 1.598984 | 2.5567481 | 24.40006 | 0.043316 | 26.15 |
| 600550 | 2016 | -0.62 | 0 | 1.598984 | 2.5567481 | 22.99046 | 0.172956 | 33.47 |
| 601633 | 2016 | 0.724 | 0 | 1.598984 | 2.5567481 | 25.24841 | 0.222875 | 56.04 |
| 601633 | 2016 | 0.724 | 0 | 1.598984 | 2.5567481 | 25.24841 | 0.222875 | 56.04 |
| 687    | 2016 | 0.394 | 0 | 1.598984 | 2.5567481 | 22.09485 | 0.114524 | 29.8  |
| 300152 | 2016 | -0.18 | 0 | 1.598984 | 2.5567481 | 21.75929 | -0.27288 | 29.46 |
| 600550 | 2016 | -0.25 | 0 | 1.598984 | 2.5567481 | 22.9131  | 0.172956 | 33.47 |
| 600482 | 2016 | 0.065 | 0 | 1.598984 | 2.5567481 | 24.40006 | 0.043316 | 26.15 |
| 600480 | 2016 | -0.43 | 0 | 1.598984 | 2.5567481 | 23.02731 | 0.07929  | 34.71 |
| 600550 | 2016 | -0.31 | 0 | 1.598984 | 2.5567481 | 22.99046 | 0.172956 | 33.47 |
| 600482 | 2016 | 0.065 | 0 | 1.598984 | 2.5567481 | 24.40006 | 0.043316 | 26.15 |
| 600480 | 2016 | -0.34 | 0 | 1.598984 | 2.5567481 | 23.02731 | 0.07929  | 34.71 |
| 300152 | 2016 | -0.1  | 0 | 1.598984 | 2.5567481 | 21.75929 | -0.27288 | 29.46 |
| 600550 | 2016 | -0.62 | 0 | 1.598984 | 2.5567481 | 22.99046 | 0.172956 | 33.47 |
| 300152 | 2016 | -0.54 | 0 | 1.598984 | 2.5567481 | 21.75929 | -0.27288 | 29.46 |

|        |      |       |      |          |           |          |          |       |
|--------|------|-------|------|----------|-----------|----------|----------|-------|
| 600550 | 2016 | -0.24 | 0    | 1.598984 | 2.5567481 | 22.99046 | 0.172956 | 33.47 |
| 600480 | 2016 | -0.59 | 0    | 1.598984 | 2.5567481 | 23.02731 | 0.07929  | 34.71 |
| 600480 | 2016 | -0.59 | 0    | 1.598984 | 2.5567481 | 23.02731 | 0.07929  | 34.71 |
| 601633 | 2016 | -0.05 | 0    | 1.598984 | 2.5567481 | 25.24841 | 0.222875 | 56.04 |
| 2342   | 2016 | -0.25 | 0    | 1.598984 | 2.5567481 | 22.12709 | 0.008528 | 20.03 |
| 600135 | 2016 | -0.76 | 0    | 1.598984 | 2.5567481 | 21.44502 | 0.027383 | 34.11 |
| 300152 | 2016 | -0.21 | 0    | 1.598984 | 2.5567481 | 21.43898 | -0.27288 | 29.46 |
| 687    | 2016 | 0.579 | 0    | 1.598984 | 2.5567481 | 22.09485 | 0.114524 | 29.8  |
| 600550 | 2016 | -0.41 | 0    | 1.598984 | 2.5567481 | 22.99046 | 0.172956 | 33.47 |
| 600482 | 2016 | 0.048 | 0    | 1.598984 | 2.5567481 | 24.40006 | 0.043316 | 26.15 |
| 2342   | 2016 | -0.25 | 0    | 1.598984 | 2.5567481 | 22.13117 | 0.008528 | 20.03 |
| 600550 | 2016 | -0.04 | 0    | 1.598984 | 2.5567481 | 22.99046 | 0.172956 | 33.47 |
| 600480 | 2016 | -0    | 0    | 1.598984 | 2.5567481 | 23.02731 | 0.07929  | 34.71 |
| 600480 | 2016 | -0.34 | 0    | 1.598984 | 2.5567481 | 23.02731 | 0.07929  | 34.71 |
| 600480 | 2016 | -0.19 | 0    | 1.598984 | 2.5567481 | 23.02731 | 0.07929  | 34.71 |
| 600550 | 2016 | -0.31 | 0    | 1.598984 | 2.5567481 | 22.99046 | 0.172956 | 33.47 |
| 600482 | 2016 | 0.065 | 0    | 1.598984 | 2.5567481 | 24.40006 | 0.043316 | 26.15 |
| 600482 | 2016 | 0.065 | 0    | 1.598984 | 2.5567481 | 24.40006 | 0.043316 | 26.15 |
| 600482 | 2016 | 0.065 | 0    | 1.598984 | 2.5567481 | 24.40006 | 0.043316 | 26.15 |
| 600480 | 2016 | 0.672 | 0    | 1.598984 | 2.5567481 | 23.02731 | 0.07929  | 34.71 |
| 600480 | 2016 | 0.075 | 0    | 1.598984 | 2.5567481 | 23.02731 | 0.07929  | 34.71 |
| 600482 | 2016 | 0.501 | 0    | 1.598984 | 2.5567481 | 23.94128 | 0.043316 | 26.15 |
| 687    | 2016 | 0.579 | 0    | 1.598984 | 2.5567481 | 21.70671 | 0.114524 | 29.8  |
| 600482 | 2016 | 0.355 | 0    | 1.598984 | 2.5567481 | 24.40006 | 0.043316 | 26.15 |
| 300152 | 2016 | -0.21 | 0    | 1.598984 | 2.5567481 | 21.75929 | -0.27288 | 29.46 |
| 601633 | 2016 | -0.05 | 0    | 1.598984 | 2.5567481 | 25.24841 | 0.222875 | 56.04 |
| 300446 | 2016 | 0.16  | 0    | 1.598984 | 2.5567481 | 20.11275 | 0.217111 | 30.61 |
| 600135 | 2016 | -0.03 | 0    | 1.598984 | 2.5567481 | 21.44502 | 0.027383 | 34.11 |
| 600482 | 2016 | 0.242 | 0    | 1.598984 | 2.5567481 | 24.40006 | 0.043316 | 26.15 |
| 600550 | 2016 | -0.31 | 0    | 1.598984 | 2.5567481 | 22.99046 | 0.172956 | 33.47 |
| 600482 | 2016 | 0.089 | 0    | 1.598984 | 2.5567481 | 24.40006 | 0.043316 | 26.15 |
| 600480 | 2016 | -0.32 | 0    | 1.598984 | 2.5567481 | 22.22402 | 0.07929  | 34.71 |
| 600482 | 2016 | -0.36 | 0    | 1.598984 | 2.5567481 | 24.40006 | 0.043316 | 26.15 |
| 300428 | 2016 | 0.675 | 0    | 1.598984 | 2.5567481 | 20.41168 | 0.112485 | 11.88 |
| 600482 | 2016 | -0.26 | 0    | 1.598984 | 2.5567481 | 24.40006 | 0.043316 | 26.15 |
| 687    | 2016 | 0.579 | 0    | 1.598984 | 2.5567481 | 22.09485 | 0.114524 | 29.8  |
| 687    | 2016 | 0.394 | 0    | 1.598984 | 2.5567481 | 22.09485 | 0.114524 | 29.8  |
| 600482 | 2016 | 0.065 | 0    | 1.598984 | 2.5567481 | 24.40006 | 0.043316 | 26.15 |
| 600482 | 2016 | 0.482 | 0    | 1.598984 | 2.5567481 | 24.40006 | 0.043316 | 26.15 |
| 600482 | 2016 | -0.57 | 0    | 1.598984 | 2.5567481 | 24.40006 | 0.043316 | 26.15 |
| 600482 | 2016 | 0.065 | 0    | 1.598984 | 2.5567481 | 24.40006 | 0.043316 | 26.15 |
| 600135 | 2016 | -0.76 | 0    | 1.598984 | 2.5567481 | 21.44502 | 0.027383 | 34.11 |
| 600482 | 2016 | 0.071 | 0    | 1.598984 | 2.5567481 | 24.40006 | 0.043316 | 26.15 |
| 600480 | 2016 | -0.59 | 0    | 1.598984 | 2.5567481 | 23.02731 | 0.07929  | 34.71 |
| 600482 | 2016 | 0.198 | 0    | 1.598984 | 2.5567481 | 24.40006 | 0.043316 | 26.15 |
| 600550 | 2016 | 0.041 | 0    | 1.598984 | 2.5567481 | 22.99046 | 0.172956 | 33.47 |
| 600480 | 2016 | 0.075 | 0    | 1.598984 | 2.5567481 | 23.02731 | 0.07929  | 34.71 |
| 600550 | 2016 | 0.044 | 0    | 1.598984 | 2.5567481 | 22.99046 | 0.172956 | 33.47 |
| 600480 | 2016 | -0.19 | 0    | 1.598984 | 2.5567481 | 23.02731 | 0.07929  | 34.71 |
| 687    | 2016 | 0.579 | 0    | 1.598984 | 2.5567481 | 22.09485 | 0.114524 | 29.8  |
| 687    | 2016 | 0.343 | 0    | 1.598984 | 2.5567481 | 22.09485 | 0.114524 | 29.8  |
| 600482 | 2016 | 0.408 | 0    | 1.598984 | 2.5567481 | 24.40006 | 0.043316 | 26.15 |
| 300152 | 2016 | -0.21 | 0    | 1.598984 | 2.5567481 | 21.75929 | -0.27288 | 29.46 |
| 600496 | 2016 | 0.026 | 0.03 | 1.100822 | 1.211808  | 23.08855 | 0.02912  | 24.17 |

|        |      |       |      |          |            |          |          |       |
|--------|------|-------|------|----------|------------|----------|----------|-------|
| 600496 | 2016 | -0.64 | 0.03 | 1.100822 | 1.211808   | 23.08855 | 0.02912  | 24.17 |
| 603198 | 2016 | -0.16 | 0.03 | 1.100822 | 1.211808   | 22.45505 | 0.173553 | 74.18 |
| 600496 | 2016 | 0.179 | 0.03 | 1.100822 | 1.211808   | 23.08855 | 0.02912  | 24.17 |
| 603198 | 2016 | -0.04 | 0.03 | 1.100822 | 1.211808   | 22.45505 | 0.173553 | 74.18 |
| 600496 | 2016 | 0.026 | 0.03 | 1.100822 | 1.211808   | 23.08855 | 0.02912  | 24.17 |
| 600496 | 2016 | -0.08 | 0.03 | 1.100822 | 1.211808   | 23.08855 | 0.02912  | 24.17 |
| 600496 | 2016 | 0.249 | 0.03 | 1.100822 | 1.211808   | 23.08855 | 0.02912  | 24.17 |
| 603198 | 2016 | -0.92 | 0.03 | 1.100822 | 1.211808   | 22.45505 | 0.173553 | 74.18 |
| 600496 | 2016 | -0.08 | 0.03 | 1.100822 | 1.211808   | 22.33099 | 0.02912  | 24.17 |
| 600496 | 2016 | -0.14 | 0.03 | 1.100822 | 1.211808   | 23.08855 | 0.02912  | 24.17 |
| 600496 | 2016 | -0.42 | 0.03 | 1.100822 | 1.211808   | 23.08855 | 0.02912  | 24.17 |
| 603198 | 2016 | -0.26 | 0.03 | 1.100822 | 1.211808   | 22.40172 | 0.173553 | 74.18 |
| 600496 | 2016 | -0.34 | 0.03 | 1.100822 | 1.211808   | 23.08855 | 0.02912  | 24.17 |
| 600496 | 2016 | -0.64 | 0.03 | 1.100822 | 1.211808   | 23.08855 | 0.02912  | 24.17 |
| 603198 | 2016 | -0.39 | 0.03 | 1.100822 | 1.211808   | 22.45505 | 0.173553 | 74.18 |
| 600496 | 2016 | 0.247 | 0.03 | 1.100822 | 1.211808   | 23.08855 | 0.02912  | 24.17 |
| 600496 | 2016 | -0.48 | 0.03 | 1.100822 | 1.211808   | 23.08855 | 0.02912  | 24.17 |
| 600496 | 2016 | -0.31 | 0.03 | 1.100822 | 1.211808   | 23.08855 | 0.02912  | 24.17 |
| 600496 | 2016 | 0.423 | 0.03 | 1.100822 | 1.211808   | 23.08855 | 0.02912  | 24.17 |
| 600496 | 2016 | -0.29 | 0.03 | 1.100822 | 1.211808   | 23.08855 | 0.02912  | 24.17 |
| 600496 | 2016 | -0.64 | 0.03 | 1.100822 | 1.211808   | 23.08855 | 0.02912  | 24.17 |
| 603198 | 2016 | -0.39 | 0.03 | 1.100822 | 1.211808   | 22.45505 | 0.173553 | 74.18 |
| 600496 | 2016 | 0.191 | 0.03 | 1.100822 | 1.211808   | 23.08855 | 0.02912  | 24.17 |
| 603198 | 2016 | -0.39 | 0.03 | 1.100822 | 1.211808   | 22.45505 | 0.173553 | 74.18 |
| 600395 | 2016 | -0.49 | 0.01 | 1.435448 | 2.0605104  | 23.16634 | 0.030342 | 58.07 |
| 600395 | 2016 | -0.55 | 0.01 | 1.435448 | 2.0605104  | 23.16634 | 0.030342 | 58.07 |
| 600395 | 2016 | -0.47 | 0.01 | 1.435448 | 2.0605104  | 23.16634 | 0.030342 | 58.07 |
| 600395 | 2016 | -0.55 | 0.01 | 1.435448 | 2.0605104  | 23.09924 | 0.030342 | 58.07 |
| 600395 | 2016 | -0.47 | 0.01 | 1.435448 | 2.0605104  | 23.16634 | 0.030342 | 58.07 |
| 600192 | 2016 | -0.57 | 0.02 | 0.0066   | 0.00004356 | 21.56457 | 0.013144 | 34.02 |
| 601798 | 2016 | -0.05 | 0.02 | 0.0066   | 0.00004356 | 21.85598 | -0.07519 | 58.54 |
| 603999 | 2016 | 0.689 | 0.02 | 0.0066   | 0.00004356 | 21.28382 | 0.047321 | 57.84 |
| 603999 | 2016 | 0.689 | 0.02 | 0.0066   | 0.00004356 | 21.38455 | 0.047321 | 57.84 |
| 300084 | 2016 | 0.271 | 0.02 | 0.0066   | 0.00004356 | 21.60212 | 0.004119 | 16.86 |
| 929    | 2016 | -0.97 | 0.02 | 0.0066   | 0.00004356 | 21.14318 | -0.02219 | 20.61 |
| 600192 | 2016 | -0.61 | 0.02 | 0.0066   | 0.00004356 | 22.25797 | 0.013144 | 34.02 |
| 600516 | 2016 | 0.404 | 0.02 | 0.0066   | 0.00004356 | 22.8097  | 0.00496  | 42.51 |
| 603169 | 2016 | -0.59 | 0.02 | 0.0066   | 0.00004356 | 22.7387  | 0.005501 | 53.22 |
| 601798 | 2016 | -0.05 | 0.02 | 0.0066   | 0.00004356 | 21.85598 | -0.07519 | 58.54 |
| 600516 | 2016 | -0.52 | 0.02 | 0.0066   | 0.00004356 | 22.8097  | 0.00496  | 42.51 |
| 600192 | 2016 | -0.5  | 0.02 | 0.0066   | 0.00004356 | 22.25797 | 0.013144 | 34.02 |
| 601798 | 2016 | -0.07 | 0.02 | 0.0066   | 0.00004356 | 21.85598 | -0.07519 | 58.54 |
| 300084 | 2016 | -0.19 | 0.02 | 0.0066   | 0.00004356 | 21.60212 | 0.004119 | 16.86 |
| 603169 | 2016 | -0.53 | 0.02 | 0.0066   | 0.00004356 | 22.7387  | 0.005501 | 53.22 |
| 600516 | 2016 | -0.73 | 0.02 | 0.0066   | 0.00004356 | 22.8097  | 0.00496  | 42.51 |
| 600516 | 2016 | -0.04 | 0.02 | 0.0066   | 0.00004356 | 22.8097  | 0.00496  | 42.51 |
| 600516 | 2016 | -0.04 | 0.02 | 0.0066   | 0.00004356 | 22.8097  | 0.00496  | 42.51 |
| 600108 | 2016 | -0.93 | 0.02 | 0.0066   | 0.00004356 | 22.62591 | 0.016565 | 15.57 |
| 603169 | 2016 | -0.72 | 0.02 | 0.0066   | 0.00004356 | 22.7387  | 0.005501 | 53.22 |
| 603169 | 2016 | -0.15 | 0.02 | 0.0066   | 0.00004356 | 22.7387  | 0.005501 | 53.22 |
| 929    | 2016 | -0.97 | 0.02 | 0.0066   | 0.00004356 | 20.10336 | -0.02219 | 20.61 |
| 603169 | 2016 | -0.29 | 0.02 | 0.0066   | 0.00004356 | 22.7387  | 0.005501 | 53.22 |
| 600192 | 2016 | -0.57 | 0.02 | 0.0066   | 0.00004356 | 22.25797 | 0.013144 | 34.02 |
| 601798 | 2016 | -0.07 | 0.02 | 0.0066   | 0.00004356 | 21.72355 | -0.07519 | 58.54 |



|        |      |       |      |          |            |          |          |       |
|--------|------|-------|------|----------|------------|----------|----------|-------|
| 600516 | 2016 | -0.04 | 0.02 | 0.0066   | 0.00004356 | 22.8097  | 0.00496  | 42.51 |
| 603169 | 2016 | -0.72 | 0.02 | 0.0066   | 0.00004356 | 22.7387  | 0.005501 | 53.22 |
| 2644   | 2016 | -0.64 | 0.02 | 0.0066   | 0.00004356 | 21.4355  | 0.047208 | 60.09 |
| 600108 | 2016 | -0.93 | 0.02 | 0.0066   | 0.00004356 | 22.77688 | 0.016565 | 15.57 |
| 601798 | 2016 | -0.09 | 0.02 | 0.0066   | 0.00004356 | 21.85598 | -0.07519 | 58.54 |
| 929    | 2016 | -0.97 | 0.02 | 0.0066   | 0.00004356 | 20.10336 | -0.02219 | 20.61 |
| 600192 | 2016 | -0.5  | 0.02 | 0.0066   | 0.00004356 | 22.25797 | 0.013144 | 34.02 |
| 600192 | 2016 | -0.57 | 0.02 | 0.0066   | 0.00004356 | 22.25797 | 0.013144 | 34.02 |
| 600192 | 2016 | 0.026 | 0.02 | 0.0066   | 0.00004356 | 22.25797 | 0.013144 | 34.02 |
| 600192 | 2016 | -0.01 | 0.02 | 0.0066   | 0.00004356 | 22.25797 | 0.013144 | 34.02 |
| 600192 | 2016 | -0.61 | 0.02 | 0.0066   | 0.00004356 | 22.25797 | 0.013144 | 34.02 |
| 300084 | 2016 | 0.492 | 0.02 | 0.0066   | 0.00004356 | 21.60212 | 0.004119 | 16.86 |
| 600192 | 2016 | -0.61 | 0.02 | 0.0066   | 0.00004356 | 22.25797 | 0.013144 | 34.02 |
| 600516 | 2016 | -0.92 | 0.02 | 0.0066   | 0.00004356 | 22.60067 | 0.00496  | 42.51 |
| 300084 | 2016 | 0.105 | 0.02 | 0.0066   | 0.00004356 | 21.60212 | 0.004119 | 16.86 |
| 300084 | 2016 | -0.19 | 0.02 | 0.0066   | 0.00004356 | 21.60212 | 0.004119 | 16.86 |
| 300084 | 2016 | 0.05  | 0.02 | 0.0066   | 0.00004356 | 21.60212 | 0.004119 | 16.86 |
| 2644   | 2016 | -0.64 | 0.02 | 0.0066   | 0.00004356 | 21.4346  | 0.047208 | 60.09 |
| 600516 | 2016 | -0.92 | 0.02 | 0.0066   | 0.00004356 | 22.8097  | 0.00496  | 42.51 |
| 2644   | 2016 | -0.64 | 0.02 | 0.0066   | 0.00004356 | 21.4346  | 0.047208 | 60.09 |
| 603169 | 2016 | -0.15 | 0.02 | 0.0066   | 0.00004356 | 22.7387  | 0.005501 | 53.22 |
| 600192 | 2016 | -0.57 | 0.02 | 0.0066   | 0.00004356 | 22.25797 | 0.013144 | 34.02 |
| 601798 | 2016 | -0.07 | 0.02 | 0.0066   | 0.00004356 | 21.85598 | -0.07519 | 58.54 |
| 600192 | 2016 | -0.61 | 0.02 | 0.0066   | 0.00004356 | 22.25797 | 0.013144 | 34.02 |
| 300084 | 2016 | -0.01 | 0.02 | 0.0066   | 0.00004356 | 21.44126 | 0.004119 | 16.86 |
| 603999 | 2016 | 0.689 | 0.02 | 0.0066   | 0.00004356 | 21.38455 | 0.047321 | 57.84 |
| 603169 | 2016 | -0.72 | 0.02 | 0.0066   | 0.00004356 | 22.7387  | 0.005501 | 53.22 |
| 601798 | 2016 | -0.07 | 0.02 | 0.0066   | 0.00004356 | 21.85598 | -0.07519 | 58.54 |
| 600192 | 2016 | -0.61 | 0.02 | 0.0066   | 0.00004356 | 22.25797 | 0.013144 | 34.02 |
| 300084 | 2016 | 0.05  | 0.02 | 0.0066   | 0.00004356 | 21.60212 | 0.004119 | 16.86 |
| 603169 | 2016 | -0.72 | 0.02 | 0.0066   | 0.00004356 | 22.54127 | 0.005501 | 53.22 |
| 600108 | 2016 | -0.93 | 0.02 | 0.0066   | 0.00004356 | 22.77688 | 0.016565 | 15.57 |
| 601798 | 2016 | 0.909 | 0.02 | 0.0066   | 0.00004356 | 21.85598 | -0.07519 | 58.54 |
| 601798 | 2016 | -0.09 | 0.02 | 0.0066   | 0.00004356 | 21.85598 | -0.07519 | 58.54 |
| 300084 | 2016 | 0.492 | 0.02 | 0.0066   | 0.00004356 | 21.60212 | 0.004119 | 16.86 |
| 600111 | 2016 | -0.29 | 0.01 | 1.405335 | 1.974967   | 23.47192 | 0.008193 | 30    |
| 600111 | 2016 | -0.53 | 0.01 | 1.405335 | 1.974967   | 23.47192 | 0.008193 | 30    |
| 600111 | 2016 | -0.29 | 0.01 | 1.405335 | 1.974967   | 23.47192 | 0.008193 | 30    |
| 600010 | 2016 | -0.31 | 0.01 | 1.405335 | 1.974967   | 25.6691  | 0.001795 | 54.66 |
| 600111 | 2016 | 0.374 | 0.01 | 1.405335 | 1.974967   | 23.47192 | 0.008193 | 30    |
| 600111 | 2016 | -0.86 | 0.01 | 1.405335 | 1.974967   | 23.47192 | 0.008193 | 30    |
| 600111 | 2016 | -0.29 | 0.01 | 1.405335 | 1.974967   | 23.30293 | 0.008193 | 30    |
| 600111 | 2016 | -0.12 | 0.01 | 1.405335 | 1.974967   | 23.47192 | 0.008193 | 30    |
| 600111 | 2016 | -0.73 | 0.01 | 1.405335 | 1.974967   | 23.47192 | 0.008193 | 30    |
| 300239 | 2016 | 0.276 | 0.01 | 1.405335 | 1.974967   | 20.55764 | 0.026746 | 32.36 |
| 600111 | 2016 | 0.466 | 0.01 | 1.405335 | 1.974967   | 23.47192 | 0.008193 | 30    |
| 600111 | 2016 | -0.12 | 0.01 | 1.405335 | 1.974967   | 23.47192 | 0.008193 | 30    |
| 600111 | 2016 | -0.29 | 0.01 | 1.405335 | 1.974967   | 23.47192 | 0.008193 | 30    |
| 600111 | 2016 | -0.29 | 0.01 | 1.405335 | 1.974967   | 23.47192 | 0.008193 | 30    |
| 600111 | 2016 | -0.86 | 0.01 | 1.405335 | 1.974967   | 23.47192 | 0.008193 | 30    |
| 600010 | 2016 | -0.31 | 0.01 | 1.405335 | 1.974967   | 25.67514 | 0.001795 | 54.66 |
| 600111 | 2016 | 0.123 | 0.01 | 1.405335 | 1.974967   | 23.47192 | 0.008193 | 30    |
| 600967 | 2016 | -0.45 | 0.01 | 1.405335 | 1.974967   | 23.3676  | 0.067936 | 51.48 |
| 600111 | 2016 | -0.29 | 0.01 | 1.405335 | 1.974967   | 23.47192 | 0.008193 | 30    |

|        |      |       |      |          |            |          |          |       |
|--------|------|-------|------|----------|------------|----------|----------|-------|
| 600010 | 2016 | -0.31 | 0.01 | 1.405335 | 1.974967   | 25.67514 | 0.001795 | 54.66 |
| 300239 | 2016 | 0.276 | 0.01 | 1.405335 | 1.974967   | 20.5407  | 0.026746 | 32.36 |
| 600111 | 2016 | -0.64 | 0.01 | 1.405335 | 1.974967   | 23.47192 | 0.008193 | 30    |
| 600967 | 2016 | -0.57 | 0.01 | 1.405335 | 1.974967   | 23.3676  | 0.067936 | 51.48 |
| 600967 | 2016 | -0.57 | 0.01 | 1.405335 | 1.974967   | 23.29883 | 0.067936 | 51.48 |
| 600967 | 2016 | -0.46 | 0.01 | 1.405335 | 1.974967   | 23.3676  | 0.067936 | 51.48 |
| 600111 | 2016 | -0.29 | 0.01 | 1.405335 | 1.974967   | 23.47192 | 0.008193 | 30    |
| 600010 | 2016 | -0.31 | 0.01 | 1.405335 | 1.974967   | 25.67514 | 0.001795 | 54.66 |
| 600111 | 2016 | -0.29 | 0.01 | 1.405335 | 1.974967   | 23.47192 | 0.008193 | 30    |
| 600967 | 2016 | -0.49 | 0.01 | 1.405335 | 1.974967   | 23.3676  | 0.067936 | 51.48 |
| 600111 | 2016 | -0.86 | 0.01 | 1.405335 | 1.974967   | 23.47192 | 0.008193 | 30    |
| 600967 | 2016 | -0.75 | 0.01 | 1.405335 | 1.974967   | 23.3676  | 0.067936 | 51.48 |
| 300239 | 2016 | 0.276 | 0.01 | 1.405335 | 1.974967   | 20.5407  | 0.026746 | 32.36 |
| 600111 | 2016 | -0.29 | 0.01 | 1.405335 | 1.974967   | 23.47192 | 0.008193 | 30    |
| 600111 | 2016 | -0.29 | 0.01 | 1.405335 | 1.974967   | 23.47192 | 0.008193 | 30    |
| 600111 | 2016 | -0.42 | 0.01 | 1.405335 | 1.974967   | 23.47192 | 0.008193 | 30    |
| 600010 | 2016 | -0.31 | 0.01 | 1.405335 | 1.974967   | 25.67514 | 0.001795 | 54.66 |
| 600111 | 2016 | -0.29 | 0.01 | 1.405335 | 1.974967   | 23.47192 | 0.008193 | 30    |
| 806    | 2016 | -0.37 | 0.04 | 0.926604 | 0.85859455 | 21.78332 | 0.007776 | 47.79 |
| 806    | 2016 | 0.014 | 0.04 | 0.926604 | 0.85859455 | 21.78332 | 0.007776 | 47.79 |
| 806    | 2016 | -0.21 | 0.04 | 0.926604 | 0.85859455 | 21.78332 | 0.007776 | 47.79 |
| 806    | 2016 | 0.622 | 0.04 | 0.926604 | 0.85859455 | 21.78332 | 0.007776 | 47.79 |
| 806    | 2016 | -0.37 | 0.04 | 0.926604 | 0.85859455 | 21.78332 | 0.007776 | 47.79 |
| 806    | 2016 | -0.65 | 0.04 | 0.926604 | 0.85859455 | 21.78332 | 0.007776 | 47.79 |
| 600538 | 2016 | 0.377 | 0.04 | 0.926604 | 0.85859455 | 20.68006 | -0.07121 | 26.46 |
| 806    | 2016 | 0.679 | 0.04 | 0.926604 | 0.85859455 | 21.78332 | 0.007776 | 47.79 |
| 600538 | 2016 | 0.377 | 0.04 | 0.926604 | 0.85859455 | 20.38196 | -0.07121 | 26.46 |
| 600538 | 2016 | 0.377 | 0.04 | 0.926604 | 0.85859455 | 20.68006 | -0.07121 | 26.46 |
| 806    | 2016 | 0.622 | 0.04 | 0.926604 | 0.85859455 | 21.78332 | 0.007776 | 47.79 |
| 806    | 2016 | -0.2  | 0.04 | 0.926604 | 0.85859455 | 21.78332 | 0.007776 | 47.79 |
| 806    | 2016 | -0.37 | 0.04 | 0.926604 | 0.85859455 | 21.78332 | 0.007776 | 47.79 |
| 806    | 2016 | -0.37 | 0.04 | 0.926604 | 0.85859455 | 21.37965 | 0.007776 | 47.79 |
| 300278 | 2016 | -0.68 | 0.05 | 0.983319 | 0.9669168  | 22.19978 | 0.073654 | 30.15 |
| 300278 | 2016 | -0.26 | 0.05 | 0.983319 | 0.9669168  | 22.19978 | 0.073654 | 30.15 |
| 300278 | 2016 | -0.16 | 0.05 | 0.983319 | 0.9669168  | 21.53096 | 0.073654 | 30.15 |
| 300278 | 2016 | -0.46 | 0.05 | 0.983319 | 0.9669168  | 22.19978 | 0.073654 | 30.15 |
| 300278 | 2016 | -0.29 | 0.05 | 0.983319 | 0.9669168  | 22.19978 | 0.073654 | 30.15 |
| 300278 | 2016 | -0.3  | 0.05 | 0.983319 | 0.9669168  | 22.19978 | 0.073654 | 30.15 |
| 300278 | 2016 | -0.24 | 0.05 | 0.983319 | 0.9669168  | 22.19978 | 0.073654 | 30.15 |
| 300278 | 2016 | -0.32 | 0.05 | 0.983319 | 0.9669168  | 22.19978 | 0.073654 | 30.15 |
| 300278 | 2016 | -0.26 | 0.05 | 0.983319 | 0.9669168  | 22.19978 | 0.073654 | 30.15 |
| 300278 | 2016 | -0.19 | 0.05 | 0.983319 | 9.67E-01   | 22.19978 | 0.073654 | 30.15 |
| 300278 | 2016 | -0.26 | 0.05 | 0.983319 | 9.67E-01   | 22.19978 | 0.073654 | 30.15 |
| 2380   | 2016 | 0.089 | 0.01 | 0.889613 | 7.91E-01   | 21.53514 | 0.043318 | 25.46 |
| 2090   | 2016 | 0.532 | 0.01 | 0.889613 | 7.91E-01   | 22.06304 | 0.105423 | 36.92 |
| 600268 | 2016 | -0.31 | 0.01 | 0.889613 | 7.91E-01   | 23.13122 | 0.059477 | 50.26 |
| 600406 | 2016 | 0.969 | 0.01 | 0.889613 | 7.91E-01   | 23.58732 | 0.162137 | 41.01 |
| 300356 | 2016 | 0.378 | 0.01 | 0.889613 | 7.91E-01   | 21.54164 | 0.053296 | 25.64 |
| 600282 | 2016 | 0.615 | 0.01 | 0.889613 | 7.91E-01   | 24.25846 | 0.052219 | 45.31 |
| 600775 | 2016 | 0.531 | 0.01 | 0.889613 | 7.91E-01   | 21.87759 | 0.048145 | 26.41 |
| 2080   | 2016 | -0.54 | 0.01 | 0.889613 | 0.79141097 | 23.74744 | 0.051114 | 60.24 |
| 2165   | 2016 | 0.211 | 0.01 | 0.889613 | 0.79141097 | 21.63895 | 0.085101 | 28    |
| 600970 | 2016 | -0.53 | 0.01 | 0.889613 | 0.79141097 | 24.04829 | 0.070563 | 39.7  |
| 600501 | 2016 | 0.087 | 0.01 | 0.889613 | 0.79141097 | 22.27425 | 0.016463 | 25.2  |

|        |      |       |      |          |            |          |          |         |
|--------|------|-------|------|----------|------------|----------|----------|---------|
| 2080   | 2016 | 0.618 | 0.01 | 0.889613 | 0.79141097 | 23.74744 | 0.051114 | 60.24   |
| 2024   | 2016 | 0.398 | 0.01 | 0.889613 | 0.79141097 | 25.64447 | 0.007054 | 20.96   |
| 600268 | 2016 | -0.01 | 0.01 | 0.889613 | 0.79141097 | 23.13122 | 0.059477 | 50.26   |
| 2182   | 2016 | -0.27 | 0.01 | 0.889613 | 0.79141097 | 21.97212 | 0.122076 | 32.03   |
| 2546   | 2016 | 0.335 | 0.01 | 0.889613 | 0.79141097 | 21.87896 | 0.033611 | 41.86   |
| 603111 | 2016 | 0.417 | 0.01 | 0.889613 | 0.79141097 | 21.71107 | 0.184385 | 11.52   |
| 300209 | 2016 | 1.719 | 0.01 | 0.889613 | 0.79141097 | 21.61999 | 0.044803 | 21.25   |
| 600074 | 2016 | 0.376 | 0.01 | 0.889613 | 0.79141097 | 22.96845 | 0.170131 | 35.07   |
| 600970 | 2016 | -0.13 | 0.01 | 0.889613 | 0.79141097 | 24.04829 | 0.070563 | 39.7    |
| 2315   | 2016 | 1.716 | 0.01 | 0.889613 | 0.79141097 | 21.65743 | 0.053712 | 56.69   |
| 2182   | 2016 | -0.31 | 0.01 | 0.889613 | 0.79141097 | 21.97212 | 0.122076 | 32.03   |
| 300447 | 2016 | 0.646 | 0.01 | 0.889613 | 0.79141097 | 20.69319 | 0.144824 | 55.82   |
| 603018 | 2016 | 0.462 | 0.01 | 0.889613 | 0.79141097 | 22.19558 | 0.109846 | 7.84    |
| 300284 | 2016 | -0.13 | 0.01 | 0.889613 | 0.79141097 | 22.91767 | 0.127639 | 21.79   |
| 2090   | 2016 | 0.517 | 0.01 | 0.889613 | 0.79141097 | 22.06304 | 0.105423 | 36.92   |
| 603018 | 2016 | 0.793 | 0.01 | 0.889613 | 0.79141097 | 22.19558 | 0.109846 | 7.84    |
| 600889 | 2016 | -0.98 | 0.01 | 0.889613 | 0.79141097 | 21.28851 | 0.061324 | 33.02   |
| 600268 | 2016 | 0.267 | 0.01 | 0.889613 | 0.79141097 | 23.13122 | 0.059477 | 50.26   |
| 2546   | 2016 | 0.178 | 0.01 | 0.889613 | 0.79141097 | 21.87896 | 0.033611 | 41.86   |
| 600501 | 2016 | -0.32 | 0.01 | 0.889613 | 0.79141097 | 22.27425 | 0.016463 | 25.2    |
| 600501 | 2016 | 0.058 | 0.01 | 0.889613 | 0.79141097 | 22.27425 | 0.016463 | 25.2    |
| 600501 | 2016 | 0.186 | 0.01 | 0.889613 | 0.79141097 | 22.27425 | 0.016463 | 25.2    |
| 300284 | 2016 | -0.03 | 0.01 | 0.889613 | 0.79141097 | 22.91767 | 0.127639 | 21.79   |
| 300284 | 2016 | -0.52 | 0.01 | 0.889613 | 0.79141097 | 22.91767 | 0.127639 | 21.79   |
| 300284 | 2016 | -0.52 | 0.01 | 0.889613 | 0.79141097 | 22.91767 | 0.127639 | 21.79   |
| 300284 | 2016 | -0.52 | 0.01 | 0.889613 | 0.79141097 | 22.91767 | 0.127639 | 21.79   |
| 300172 | 2016 | 0.736 | 0.01 | 0.889613 | 0.79141097 | 21.26661 | 0.102676 | 28.98   |
| 603111 | 2016 | 0.184 | 0.01 | 0.889613 | 0.79141097 | 21.71107 | 0.184385 | 11.52   |
| 525    | 2016 | 0.713 | 0.01 | 0.889613 | 0.79141097 | 23.07555 | 0.026344 | 51.75   |
| 2090   | 2016 | 0.532 | 0.01 | 0.889613 | 0.79141097 | 22.06304 | 0.105423 | 36.92   |
| 600959 | 2016 | 0.572 | 0.01 | 0.889613 | 0.79141097 | 24.17833 | 0.049153 | 18.04   |
| 600775 | 2016 | 0.03  | 0.01 | 0.889613 | 0.79141097 | 22.37958 | 0.048145 | 26.41   |
| 2080   | 2016 | -0.04 | 0.01 | 0.889613 | 0.79141097 | 23.74744 | 0.051114 | 60.24   |
| 2546   | 2016 | 0.628 | 0.01 | 0.889613 | 0.79141097 | 21.87896 | 0.033611 | 41.86   |
| 2080   | 2016 | -0.09 | 0.01 | 0.889613 | 0.79141097 | 23.74744 | 0.051114 | 60.24   |
| 600562 | 2016 | 0.296 | 0.01 | 0.889613 | 0.79141097 | 21.6175  | 0.135302 | 26.48   |
| 2315   | 2016 | 1.628 | 0.01 | 0.889613 | 0.79141097 | 21.63753 | 0.053712 | 56.69   |
| 300209 | 2016 | 1.054 | 0.01 | 0.889613 | 0.79141097 | 21.61999 | 0.044803 | 21.25   |
| 600970 | 2016 | 0.008 | 0.01 | 0.889613 | 0.79141097 | 24.04829 | 0.070563 | 39.7    |
| 600406 | 2016 | -0.1  | 0.01 | 0.889613 | 0.79141097 | 23.17777 | 0.162137 | 41.01   |
| 600889 | 2016 | -0.98 | 0.01 | 0.889613 | 0.79141097 | 21.52456 | 0.061324 | 33.02   |
| 603111 | 2016 | -0.24 | 0.01 | 0.889613 | 0.79141097 | 21.71107 | 0.184385 | 11.52   |
| 603066 | 2016 | -0.24 | 0.01 | 0.889613 | 0.79141097 | 20.73899 | 0.102432 | 45.2289 |
| 2747   | 2016 | 0.756 | 0.01 | 0.889613 | 0.79141097 | 21.35503 | 0.051858 | 35.9    |
| 2090   | 2016 | 0.446 | 0.01 | 0.889613 | 0.79141097 | 22.06304 | 0.105423 | 36.92   |
| 2024   | 2016 | 0.398 | 0.01 | 0.889613 | 0.79141097 | 25.64447 | 0.007054 | 20.96   |
| 600282 | 2016 | -0.07 | 0.01 | 0.889613 | 0.79141097 | 24.0407  | 0.052219 | 45.31   |
| 603518 | 2016 | -0.24 | 0.01 | 0.889613 | 0.79141097 | 21.19137 | 0.06874  | 32.66   |
| 603066 | 2016 | -0.24 | 0.01 | 0.889613 | 0.79141097 | 20.73899 | 0.102432 | 45.2289 |
| 2546   | 2016 | -0.03 | 0.01 | 0.889613 | 0.79141097 | 21.87896 | 0.033611 | 41.86   |
| 600959 | 2016 | 0.572 | 0.01 | 0.889613 | 0.79141097 | 24.17833 | 0.049153 | 18.04   |
| 600775 | 2016 | -0.05 | 0.01 | 0.889613 | 0.79141097 | 22.37958 | 0.048145 | 26.41   |
| 2315   | 2016 | 1.373 | 0.01 | 0.889613 | 0.79141097 | 21.65743 | 0.053712 | 56.69   |
| 600074 | 2016 | -0.3  | 0.01 | 0.889613 | 0.79141097 | 22.96845 | 0.170131 | 35.07   |

|        |      |       |      |          |            |          |          |         |
|--------|------|-------|------|----------|------------|----------|----------|---------|
| 2090   | 2016 | 0.517 | 0.01 | 0.889613 | 0.79141097 | 21.52883 | 0.105423 | 36.92   |
| 603518 | 2016 | 0.03  | 0.01 | 0.889613 | 0.79141097 | 21.19137 | 0.06874  | 32.66   |
| 600268 | 2016 | 0.014 | 0.01 | 0.889613 | 0.79141097 | 23.13122 | 0.059477 | 50.26   |
| 600775 | 2016 | 0.071 | 0.01 | 0.889613 | 0.79141097 | 22.37958 | 0.048145 | 26.41   |
| 603111 | 2016 | 0.17  | 0.01 | 0.889613 | 0.79141097 | 21.71107 | 0.184385 | 11.52   |
| 600970 | 2016 | -0.53 | 0.01 | 0.889613 | 0.79141097 | 24.04829 | 0.070563 | 39.7    |
| 600406 | 2016 | 1.059 | 0.01 | 0.889613 | 0.79141097 | 23.58732 | 0.162137 | 41.01   |
| 600282 | 2016 | 0.615 | 0.01 | 0.889613 | 0.79141097 | 24.25846 | 0.052219 | 45.31   |
| 300402 | 2016 | -0.28 | 0.01 | 0.889613 | 0.79141097 | 21.00708 | -0.16737 | 57.52   |
| 600268 | 2016 | 0.04  | 0.01 | 0.889613 | 0.79141097 | 23.13122 | 0.059477 | 50.26   |
| 300172 | 2016 | -0.03 | 0.01 | 0.889613 | 0.79141097 | 21.26661 | 0.102676 | 28.98   |
| 2380   | 2016 | 0.387 | 0.01 | 0.889613 | 0.79141097 | 21.53514 | 0.043318 | 25.46   |
| 2315   | 2016 | 1.645 | 0.01 | 0.889613 | 0.79141097 | 21.65743 | 0.053712 | 56.69   |
| 600282 | 2016 | 0.615 | 0.01 | 0.889613 | 0.79141097 | 24.25846 | 0.052219 | 45.31   |
| 603066 | 2016 | -0.24 | 0.01 | 0.889613 | 0.79141097 | 20.73899 | 0.102432 | 45.2289 |
| 300339 | 2016 | 1.224 | 0.01 | 0.889613 | 0.79141097 | 22.3575  | 0.086412 | 17.48   |
| 600268 | 2016 | 0.789 | 0.01 | 0.889613 | 0.79141097 | 23.13122 | 0.059477 | 50.26   |
| 600959 | 2016 | 0.572 | 0.01 | 0.889613 | 0.79141097 | 24.17833 | 0.049153 | 18.04   |
| 603518 | 2016 | -0.24 | 0.01 | 0.889613 | 0.79141097 | 21.19137 | 0.06874  | 32.66   |
| 600268 | 2016 | 0.789 | 0.01 | 0.889613 | 0.79141097 | 23.13122 | 0.059477 | 50.26   |
| 2380   | 2016 | 0.387 | 0.01 | 0.889613 | 0.79141097 | 21.53416 | 0.043318 | 25.46   |
| 603066 | 2016 | -0.24 | 0.01 | 0.889613 | 0.79141097 | 20.73899 | 0.102432 | 45.2289 |
| 600970 | 2016 | 0.029 | 0.01 | 0.889613 | 7.91E-01   | 24.04829 | 0.070563 | 39.7    |
| 600775 | 2016 | 0.071 | 0.01 | 0.889613 | 7.91E-01   | 22.37958 | 0.048145 | 26.41   |
| 525    | 2016 | 0.826 | 0.01 | 0.889613 | 7.91E-01   | 23.07555 | 0.026344 | 51.75   |
| 600889 | 2016 | -0.98 | 0.01 | 0.889613 | 7.91E-01   | 21.52456 | 0.061324 | 33.02   |
| 600282 | 2016 | 0.615 | 0.01 | 0.889613 | 7.91E-01   | 24.25846 | 0.052219 | 45.31   |
| 600282 | 2016 | 0.615 | 0.01 | 0.889613 | 7.91E-01   | 24.25846 | 0.052219 | 45.31   |
| 2165   | 2016 | 0.741 | 0.01 | 0.889613 | 7.91E-01   | 21.63895 | 0.085101 | 28      |
| 600562 | 2016 | 0.574 | 0.01 | 0.889613 | 7.91E-01   | 21.6175  | 0.135302 | 26.48   |
| 600406 | 2016 | 0.969 | 0.01 | 0.889613 | 0.79141097 | 23.58732 | 0.162137 | 41.01   |
| 600406 | 2016 | 0.942 | 0.01 | 0.889613 | 0.79141097 | 23.58732 | 0.162137 | 41.01   |
| 2080   | 2016 | -0.08 | 0.01 | 0.889613 | 0.79141097 | 23.74744 | 0.051114 | 60.24   |
| 300284 | 2016 | -0.52 | 0.01 | 0.889613 | 0.79141097 | 22.91767 | 0.127639 | 21.79   |
| 2080   | 2016 | -0.34 | 0.01 | 0.889613 | 0.79141097 | 23.74744 | 0.051114 | 60.24   |
| 300402 | 2016 | -0.28 | 0.01 | 0.889613 | 0.79141097 | 21.00708 | -0.16737 | 57.52   |
| 300284 | 2016 | 0.056 | 0.01 | 0.889613 | 0.79141097 | 22.91767 | 0.127639 | 21.79   |
| 727    | 2016 | 1.204 | 0.01 | 0.889613 | 0.79141097 | 24.24349 | 0.004559 | 24.51   |
| 600074 | 2016 | -0.3  | 0.01 | 0.889613 | 0.79141097 | 22.94977 | 0.170131 | 35.07   |
| 525    | 2016 | 0.713 | 0.01 | 0.889613 | 0.79141097 | 23.07555 | 0.026344 | 51.75   |
| 600406 | 2016 | 0.89  | 0.01 | 0.889613 | 0.79141097 | 23.58732 | 0.162137 | 41.01   |
| 2380   | 2016 | -0.06 | 0.01 | 0.889613 | 0.79141097 | 21.53514 | 0.043318 | 25.46   |
| 603111 | 2016 | 0.09  | 0.01 | 0.889613 | 0.79141097 | 21.71107 | 0.184385 | 11.52   |
| 600959 | 2016 | 0.572 | 0.01 | 0.889613 | 0.79141097 | 24.17833 | 0.049153 | 18.04   |
| 2165   | 2016 | 0.741 | 0.01 | 0.889613 | 0.79141097 | 21.63895 | 0.085101 | 28      |
| 2024   | 2016 | 0.398 | 0.01 | 0.889613 | 0.79141097 | 25.64447 | 0.007054 | 20.96   |
| 600268 | 2016 | 0.267 | 0.01 | 0.889613 | 0.79141097 | 23.13122 | 0.059477 | 50.26   |
| 600501 | 2016 | 0.087 | 0.01 | 0.889613 | 0.79141097 | 22.27425 | 0.016463 | 25.2    |
| 2080   | 2016 | 0.009 | 0.01 | 0.889613 | 0.79141097 | 23.06049 | 0.051114 | 60.24   |
| 600562 | 2016 | 0.244 | 0.01 | 0.889613 | 0.79141097 | 21.6175  | 0.135302 | 26.48   |
| 600970 | 2016 | -0.1  | 0.01 | 0.889613 | 0.79141097 | 24.04829 | 0.070563 | 39.7    |
| 300284 | 2016 | 0.346 | 0.01 | 0.889613 | 0.79141097 | 22.91767 | 0.127639 | 21.79   |
| 2080   | 2016 | 0.618 | 0.01 | 0.889613 | 0.79141097 | 23.74744 | 0.051114 | 60.24   |
| 603018 | 2016 | 0.061 | 0.01 | 0.889613 | 0.79141097 | 22.19558 | 0.109846 | 7.84    |

|        |      |       |      |          |            |          |          |       |
|--------|------|-------|------|----------|------------|----------|----------|-------|
| 600959 | 2016 | 0.572 | 0.01 | 0.889613 | 0.79141097 | 23.61893 | 0.049153 | 18.04 |
| 300172 | 2016 | -0.32 | 0.01 | 0.889613 | 0.79141097 | 21.26661 | 0.102676 | 28.98 |
| 600268 | 2016 | 0.267 | 0.01 | 0.889613 | 0.79141097 | 23.13122 | 0.059477 | 50.26 |
| 2747   | 2016 | 0.802 | 0.01 | 0.889613 | 0.79141097 | 21.35503 | 0.051858 | 35.9  |
| 600501 | 2016 | 0.087 | 0.01 | 0.889613 | 0.79141097 | 22.27425 | 0.016463 | 25.2  |
| 2315   | 2016 | 1.03  | 0.01 | 0.889613 | 0.79141097 | 21.65743 | 0.053712 | 56.69 |
| 300447 | 2016 | -0.12 | 0.01 | 0.889613 | 0.79141097 | 20.65673 | 0.144824 | 55.82 |
| 600970 | 2016 | 0.073 | 0.01 | 0.889613 | 0.79141097 | 24.04829 | 0.070563 | 39.7  |
| 300284 | 2016 | -0.52 | 0.01 | 0.889613 | 0.79141097 | 22.91767 | 0.127639 | 21.79 |
| 600064 | 2016 | 0.175 | 0.01 | 0.889613 | 0.79141097 | 23.94603 | 0.098303 | 34.74 |
| 603018 | 2016 | 0.793 | 0.01 | 0.889613 | 0.79141097 | 22.19558 | 0.109846 | 7.84  |
| 300209 | 2016 | 1.719 | 0.01 | 0.889613 | 0.79141097 | 21.61999 | 0.044803 | 21.25 |
| 300172 | 2016 | 0.238 | 0.01 | 0.889613 | 0.79141097 | 21.11318 | 0.102676 | 28.98 |
| 300447 | 2016 | 0.646 | 0.01 | 0.889613 | 0.79141097 | 20.69319 | 0.144824 | 55.82 |
| 600268 | 2016 | 0.267 | 0.01 | 0.889613 | 0.79141097 | 23.13122 | 0.059477 | 50.26 |
| 300284 | 2016 | -0.03 | 0.01 | 0.889613 | 0.79141097 | 22.91767 | 0.127639 | 21.79 |
| 300339 | 2016 | 1.224 | 0.01 | 0.889613 | 0.79141097 | 22.14723 | 0.086412 | 17.48 |
| 600268 | 2016 | 0.031 | 0.01 | 0.889613 | 0.79141097 | 23.13122 | 0.059477 | 50.26 |
| 300172 | 2016 | 0.066 | 0.01 | 0.889613 | 0.79141097 | 21.26661 | 0.102676 | 28.98 |
| 600970 | 2016 | -0.53 | 0.01 | 0.889613 | 0.79141097 | 24.04829 | 0.070563 | 39.7  |
| 2546   | 2016 | 0.363 | 0.01 | 0.889613 | 0.79141097 | 21.87896 | 0.033611 | 41.86 |
| 300172 | 2016 | 0.055 | 0.01 | 0.889613 | 0.79141097 | 21.26661 | 0.102676 | 28.98 |
| 600268 | 2016 | 0.267 | 0.01 | 0.889613 | 0.79141097 | 23.13122 | 0.059477 | 50.26 |
| 600713 | 2016 | -0.99 | 0.01 | 0.889613 | 0.79141097 | 22.78898 | 0.077735 | 26.94 |
| 727    | 2016 | 0.851 | 0.01 | 0.889613 | 0.79141097 | 24.24349 | 0.004559 | 24.51 |
| 300339 | 2016 | 1.224 | 0.01 | 0.889613 | 0.79141097 | 22.3575  | 0.086412 | 17.48 |
| 600064 | 2016 | 0.175 | 0.01 | 0.889613 | 0.79141097 | 23.94603 | 0.098303 | 34.74 |
| 300356 | 2016 | 0.466 | 0.01 | 0.889613 | 0.79141097 | 21.54164 | 0.053296 | 25.64 |
| 600268 | 2016 | -0.05 | 0.01 | 0.889613 | 0.79141097 | 23.13122 | 0.059477 | 50.26 |
| 600268 | 2016 | -0.24 | 0.01 | 0.889613 | 0.79141097 | 23.13122 | 0.059477 | 50.26 |
| 2182   | 2016 | -0.23 | 0.01 | 0.889613 | 0.79141097 | 21.97212 | 0.122076 | 32.03 |
| 600282 | 2016 | -0.07 | 0.01 | 0.889613 | 0.79141097 | 24.25846 | 0.052219 | 45.31 |
| 600268 | 2016 | -0.16 | 0.01 | 0.889613 | 0.79141097 | 23.13122 | 0.059477 | 50.26 |
| 2165   | 2016 | 0.741 | 0.01 | 0.889613 | 0.79141097 | 21.63895 | 0.085101 | 28    |
| 603111 | 2016 | 0.193 | 0.01 | 0.889613 | 0.79141097 | 21.48447 | 0.184385 | 11.52 |
| 600406 | 2016 | 0.783 | 0.01 | 0.889613 | 0.79141097 | 23.58732 | 0.162137 | 41.01 |
| 600775 | 2016 | 0.283 | 0.01 | 0.889613 | 0.79141097 | 22.37958 | 0.048145 | 26.41 |
| 2080   | 2016 | -0.54 | 0.01 | 0.889613 | 0.79141097 | 23.74744 | 0.051114 | 60.24 |
| 525    | 2016 | 0.76  | 0.01 | 0.889613 | 0.79141097 | 23.07555 | 0.026344 | 51.75 |
| 600501 | 2016 | 0.087 | 0.01 | 0.889613 | 0.79141097 | 22.27425 | 0.016463 | 25.2  |
| 2090   | 2016 | -0.28 | 0.01 | 0.889613 | 0.79141097 | 22.06304 | 0.105423 | 36.92 |
| 727    | 2016 | 0.749 | 0.01 | 0.889613 | 0.79141097 | 23.24165 | 0.004559 | 24.51 |
| 727    | 2016 | 0.513 | 0.01 | 0.889613 | 0.79141097 | 24.24349 | 0.004559 | 24.51 |
| 600501 | 2016 | -0.02 | 0.01 | 0.889613 | 0.79141097 | 22.27425 | 0.016463 | 25.2  |
| 600268 | 2016 | -0.01 | 0.01 | 0.889613 | 0.79141097 | 23.13122 | 0.059477 | 50.26 |
| 603111 | 2016 | 0.032 | 0.01 | 0.889613 | 0.79141097 | 21.71107 | 0.184385 | 11.52 |
| 600268 | 2016 | 0.789 | 0.01 | 0.889613 | 0.79141097 | 23.13122 | 0.059477 | 50.26 |
| 600282 | 2016 | -0.06 | 0.01 | 0.889613 | 0.79141097 | 24.25846 | 0.052219 | 45.31 |
| 603518 | 2016 | -0.24 | 0.01 | 0.889613 | 0.79141097 | 21.19122 | 0.06874  | 32.66 |
| 600282 | 2016 | 0.615 | 0.01 | 0.889613 | 0.79141097 | 24.25846 | 0.052219 | 45.31 |
| 300356 | 2016 | 0.246 | 0.01 | 0.889613 | 0.79141097 | 21.54164 | 0.053296 | 25.64 |
| 603518 | 2016 | 0.03  | 0.01 | 0.889613 | 0.79141097 | 21.19137 | 0.06874  | 32.66 |
| 603111 | 2016 | 0.193 | 0.01 | 0.889613 | 0.79141097 | 21.71107 | 0.184385 | 11.52 |
| 2024   | 2016 | 0.398 | 0.01 | 0.889613 | 0.79141097 | 25.64447 | 0.007054 | 20.96 |

|        |      |       |      |          |            |          |          |         |
|--------|------|-------|------|----------|------------|----------|----------|---------|
| 600064 | 2016 | 0.175 | 0.01 | 0.889613 | 0.79141097 | 23.45866 | 0.098303 | 34.74   |
| 300284 | 2016 | -0.52 | 0.01 | 0.889613 | 0.79141097 | 22.91767 | 0.127639 | 21.79   |
| 300172 | 2016 | -0.1  | 0.01 | 0.889613 | 0.79141097 | 21.26661 | 0.102676 | 28.98   |
| 603111 | 2016 | -0.03 | 0.01 | 0.889613 | 0.79141097 | 21.71107 | 0.184385 | 11.52   |
| 300172 | 2016 | -0.03 | 0.01 | 0.889613 | 0.79141097 | 21.26661 | 0.102676 | 28.98   |
| 600970 | 2016 | -0.42 | 0.01 | 0.889613 | 0.79141097 | 24.04829 | 0.070563 | 39.7    |
| 2546   | 2016 | 0.363 | 0.01 | 0.889613 | 0.79141097 | 21.87896 | 0.033611 | 41.86   |
| 300356 | 2016 | 0.187 | 0.01 | 0.889613 | 0.79141097 | 21.18619 | 0.053296 | 25.64   |
| 600501 | 2016 | -0.46 | 0.01 | 0.889613 | 0.79141097 | 22.27425 | 0.016463 | 25.2    |
| 600406 | 2016 | 0.997 | 0.01 | 0.889613 | 0.79141097 | 23.58732 | 0.162137 | 41.01   |
| 600406 | 2016 | 1.012 | 0.01 | 0.889613 | 0.79141097 | 23.58732 | 0.162137 | 41.01   |
| 2024   | 2016 | 0.398 | 0.01 | 0.889613 | 0.79141097 | 25.54231 | 0.007054 | 20.96   |
| 600775 | 2016 | 0.141 | 0.01 | 0.889613 | 0.79141097 | 22.37958 | 0.048145 | 26.41   |
| 600268 | 2016 | 0.267 | 0.01 | 0.889613 | 0.79141097 | 23.13122 | 0.059477 | 50.26   |
| 300209 | 2016 | 0.394 | 0.01 | 0.889613 | 0.79141097 | 21.61999 | 0.044803 | 21.25   |
| 727    | 2016 | 0.736 | 0.01 | 0.889613 | 0.79141097 | 24.24349 | 0.004559 | 24.51   |
| 600406 | 2016 | 0.865 | 0.01 | 0.889613 | 0.79141097 | 23.58732 | 0.162137 | 41.01   |
| 600775 | 2016 | 0.815 | 0.01 | 0.889613 | 0.79141097 | 22.37958 | 0.048145 | 26.41   |
| 603018 | 2016 | 0.628 | 0.01 | 0.889613 | 0.79141097 | 22.19558 | 0.109846 | 7.84    |
| 2182   | 2016 | -0.27 | 0.01 | 0.889613 | 0.79141097 | 21.97212 | 0.122076 | 32.03   |
| 300447 | 2016 | -0.12 | 0.01 | 0.889613 | 0.79141097 | 20.69319 | 0.144824 | 55.82   |
| 2315   | 2016 | 1.645 | 0.01 | 0.889613 | 0.79141097 | 21.65743 | 0.053712 | 56.69   |
| 600406 | 2016 | 0.415 | 0.01 | 0.889613 | 0.79141097 | 23.58732 | 0.162137 | 41.01   |
| 600889 | 2016 | -0.98 | 0.01 | 0.889613 | 0.79141097 | 21.52456 | 0.061324 | 33.02   |
| 603066 | 2016 | -0.24 | 0.01 | 0.889613 | 0.79141097 | 20.70717 | 0.102432 | 45.2289 |
| 600406 | 2016 | 0.942 | 0.01 | 0.889613 | 0.79141097 | 23.58732 | 0.162137 | 41.01   |
| 300284 | 2016 | -0.44 | 0.01 | 0.889613 | 0.79141097 | 22.91767 | 0.127639 | 21.79   |
| 300284 | 2016 | -0.02 | 0.01 | 0.889613 | 0.79141097 | 22.91767 | 0.127639 | 21.79   |
| 2747   | 2016 | 0.388 | 0.01 | 0.889613 | 0.79141097 | 21.35503 | 0.051858 | 35.9    |
| 600775 | 2016 | 0.141 | 0.01 | 0.889613 | 0.79141097 | 22.37958 | 0.048145 | 26.41   |
| 603066 | 2016 | -0.24 | 0.01 | 0.889613 | 0.79141097 | 20.73899 | 0.102432 | 45.2289 |
| 600970 | 2016 | -0.42 | 0.01 | 0.889613 | 0.79141097 | 24.04829 | 0.070563 | 39.7    |
| 600268 | 2016 | 0.267 | 0.01 | 0.889613 | 0.79141097 | 23.13122 | 0.059477 | 50.26   |
| 2080   | 2016 | 0.283 | 0.01 | 0.889613 | 0.79141097 | 23.74744 | 0.051114 | 60.24   |
| 300209 | 2016 | 0.522 | 0.01 | 0.889613 | 0.79141097 | 21.61999 | 0.044803 | 21.25   |
| 300209 | 2016 | 1.719 | 0.01 | 0.889613 | 0.79141097 | 21.61999 | 0.044803 | 21.25   |
| 600074 | 2016 | 1.025 | 0.01 | 0.889613 | 0.79141097 | 22.96845 | 0.170131 | 35.07   |
| 600268 | 2016 | -0.54 | 0.01 | 0.889613 | 0.79141097 | 23.05816 | 0.059477 | 50.26   |
| 600268 | 2016 | 0.267 | 0.01 | 0.889613 | 0.79141097 | 23.13122 | 0.059477 | 50.26   |
| 300172 | 2016 | 0.736 | 0.01 | 0.889613 | 0.79141097 | 21.26661 | 0.102676 | 28.98   |
| 525    | 2016 | 0.457 | 0.01 | 0.889613 | 0.79141097 | 23.07555 | 0.026344 | 51.75   |
| 600889 | 2016 | -0.98 | 0.01 | 0.889613 | 0.79141097 | 21.52456 | 0.061324 | 33.02   |
| 2546   | 2016 | 0.407 | 0.01 | 0.889613 | 0.79141097 | 21.87896 | 0.033611 | 41.86   |
| 300172 | 2016 | 0.107 | 0.01 | 0.889613 | 0.79141097 | 21.26661 | 0.102676 | 28.98   |
| 600406 | 2016 | 0.942 | 0.01 | 0.889613 | 0.79141097 | 23.58732 | 0.162137 | 41.01   |
| 727    | 2016 | 1.459 | 0.01 | 0.889613 | 0.79141097 | 24.24349 | 0.004559 | 24.51   |
| 2546   | 2016 | 0.628 | 0.01 | 0.889613 | 0.79141097 | 21.87896 | 0.033611 | 41.86   |
| 600970 | 2016 | -0.21 | 0.01 | 0.889613 | 0.79141097 | 24.04829 | 0.070563 | 39.7    |
| 525    | 2016 | 0.713 | 0.01 | 0.889613 | 0.79141097 | 23.07555 | 0.026344 | 51.75   |
| 2165   | 2016 | -0.14 | 0.01 | 0.889613 | 0.79141097 | 21.3283  | 0.085101 | 28      |
| 600501 | 2016 | 0.07  | 0.01 | 0.889613 | 0.79141097 | 22.27425 | 0.016463 | 25.2    |
| 603018 | 2016 | -0.02 | 0.01 | 0.889613 | 0.79141097 | 22.19558 | 0.109846 | 7.84    |
| 2090   | 2016 | -0.28 | 0.01 | 0.889613 | 0.79141097 | 22.06304 | 0.105423 | 36.92   |
| 2080   | 2016 | 0.789 | 0.01 | 0.889613 | 0.79141097 | 23.74744 | 0.051114 | 60.24   |

|        |      |       |      |          |            |          |          |       |
|--------|------|-------|------|----------|------------|----------|----------|-------|
| 600970 | 2016 | 0.184 | 0.01 | 0.889613 | 0.79141097 | 24.04829 | 0.070563 | 39.7  |
| 600970 | 2016 | -0.42 | 0.01 | 0.889613 | 0.79141097 | 24.04829 | 0.070563 | 39.7  |
| 2546   | 2016 | 0.154 | 0.01 | 0.889613 | 0.79141097 | 21.87896 | 0.033611 | 41.86 |
| 600268 | 2016 | 0.032 | 0.01 | 0.889613 | 0.79141097 | 23.13122 | 0.059477 | 50.26 |
| 2080   | 2016 | -0.2  | 0.01 | 0.889613 | 0.79141097 | 23.74744 | 0.051114 | 60.24 |
| 2747   | 2016 | 0.407 | 0.01 | 0.889613 | 0.79141097 | 21.35503 | 0.051858 | 35.9  |
| 300209 | 2016 | 0.554 | 0.01 | 0.889613 | 0.79141097 | 21.36996 | 0.044803 | 21.25 |
| 300172 | 2016 | -0.03 | 0.01 | 0.889613 | 0.79141097 | 21.26661 | 0.102676 | 28.98 |
| 2546   | 2016 | 0.407 | 0.01 | 0.889613 | 0.79141097 | 21.87896 | 0.033611 | 41.86 |
| 525    | 2016 | 0.713 | 0.01 | 0.889613 | 0.79141097 | 23.07555 | 0.026344 | 51.75 |
| 2165   | 2016 | 0.409 | 0.01 | 0.889613 | 0.79141097 | 21.63895 | 0.085101 | 28    |
| 603111 | 2016 | 0.197 | 0.01 | 0.889613 | 0.79141097 | 21.71107 | 0.184385 | 11.52 |
| 600074 | 2016 | 0.363 | 0.01 | 0.889613 | 0.79141097 | 22.96845 | 0.170131 | 35.07 |
| 2747   | 2016 | 0.533 | 0.01 | 0.889613 | 0.79141097 | 21.35503 | 0.051858 | 35.9  |
| 600406 | 2016 | 0.696 | 0.01 | 0.889613 | 0.79141097 | 23.58732 | 0.162137 | 41.01 |
| 600970 | 2016 | -0.16 | 0.01 | 0.889613 | 0.79141097 | 24.04829 | 0.070563 | 39.7  |
| 600501 | 2016 | 0.087 | 0.01 | 0.889613 | 0.79141097 | 22.10718 | 0.016463 | 25.2  |
| 300402 | 2016 | -0.28 | 0.01 | 0.889613 | 0.79141097 | 21.00708 | -0.16737 | 57.52 |
| 727    | 2016 | 0.796 | 0.01 | 0.889613 | 0.79141097 | 24.24349 | 0.004559 | 24.51 |
| 600501 | 2016 | 0.087 | 0.01 | 0.889613 | 0.79141097 | 22.27425 | 0.016463 | 25.2  |
| 300402 | 2016 | -0.28 | 0.01 | 0.889613 | 0.79141097 | 21.00708 | -0.16737 | 57.52 |
| 2380   | 2016 | -0.06 | 0.01 | 0.889613 | 0.79141097 | 21.53514 | 0.043318 | 25.46 |
| 600501 | 2016 | -0.46 | 0.01 | 0.889613 | 0.79141097 | 22.27425 | 0.016463 | 25.2  |
| 600268 | 2016 | 0.267 | 0.01 | 0.889613 | 0.79141097 | 23.13122 | 0.059477 | 50.26 |
| 603111 | 2016 | 0.421 | 0.01 | 0.889613 | 0.79141097 | 21.71107 | 0.184385 | 11.52 |
| 2090   | 2016 | 0.552 | 0.01 | 0.889613 | 0.79141097 | 22.06304 | 0.105423 | 36.92 |
| 600970 | 2016 | -0.44 | 0.01 | 0.889613 | 0.79141097 | 24.04829 | 0.070563 | 39.7  |
| 2090   | 2016 | 0.532 | 0.01 | 0.889613 | 0.79141097 | 22.06304 | 0.105423 | 36.92 |
| 600268 | 2016 | -0.54 | 0.01 | 0.889613 | 0.79141097 | 23.13122 | 0.059477 | 50.26 |
| 603018 | 2016 | -0.09 | 0.01 | 0.889613 | 0.79141097 | 22.19558 | 0.109846 | 7.84  |
| 300172 | 2016 | 0.238 | 0.01 | 0.889613 | 0.79141097 | 21.26661 | 0.102676 | 28.98 |
| 600074 | 2016 | 0.278 | 0.01 | 0.889613 | 0.79141097 | 22.96845 | 0.170131 | 35.07 |
| 525    | 2016 | 0.705 | 0.01 | 0.889613 | 0.79141097 | 23.07555 | 0.026344 | 51.75 |
| 525    | 2016 | 0.713 | 0.01 | 0.889613 | 0.79141097 | 22.65137 | 0.026344 | 51.75 |
| 600775 | 2016 | 0.221 | 0.01 | 0.889613 | 0.79141097 | 22.37958 | 0.048145 | 26.41 |
| 2380   | 2016 | 0.308 | 0.01 | 0.889613 | 0.79141097 | 21.53514 | 0.043318 | 25.46 |
| 2380   | 2016 | 0.107 | 0.01 | 0.889613 | 0.79141097 | 21.53514 | 0.043318 | 25.46 |
| 600775 | 2016 | 0.141 | 0.01 | 0.889613 | 0.79141097 | 22.37958 | 0.048145 | 26.41 |
| 300209 | 2016 | 1.719 | 0.01 | 0.889613 | 0.79141097 | 21.61999 | 0.044803 | 21.25 |
| 600713 | 2016 | -0.99 | 0.01 | 0.889613 | 0.79141097 | 23.35959 | 0.077735 | 26.94 |
| 600970 | 2016 | -0.42 | 0.01 | 0.889613 | 0.79141097 | 24.04829 | 0.070563 | 39.7  |
| 600074 | 2016 | -0.3  | 0.01 | 0.889613 | 0.79141097 | 22.96845 | 0.170131 | 35.07 |
| 2747   | 2016 | 0.573 | 0.01 | 0.889613 | 0.79141097 | 21.2105  | 0.051858 | 35.9  |
| 2182   | 2016 | -0.62 | 0.01 | 0.889613 | 0.79141097 | 21.97212 | 0.122076 | 32.03 |
| 2182   | 2016 | -0.23 | 0.01 | 0.889613 | 0.79141097 | 21.97212 | 0.122076 | 32.03 |
| 2090   | 2016 | 0.532 | 0.01 | 0.889613 | 0.79141097 | 22.06304 | 0.105423 | 36.92 |
| 300402 | 2016 | -0.28 | 0.01 | 0.889613 | 0.79141097 | 21.00708 | -0.16737 | 57.52 |
| 600074 | 2016 | 0.363 | 0.01 | 0.889613 | 0.79141097 | 22.96845 | 0.170131 | 35.07 |
| 2080   | 2016 | 0.283 | 0.01 | 0.889613 | 0.79141097 | 23.74744 | 0.051114 | 60.24 |
| 300339 | 2016 | 1.224 | 0.01 | 0.889613 | 0.79141097 | 22.3575  | 0.086412 | 17.48 |
| 727    | 2016 | 0.134 | 0.01 | 0.889613 | 0.79141097 | 24.24349 | 0.004559 | 24.51 |
| 2546   | 2016 | 0.628 | 0.01 | 0.889613 | 0.79141097 | 21.87896 | 0.033611 | 41.86 |
| 603018 | 2016 | 0.793 | 0.01 | 0.889613 | 0.79141097 | 22.19558 | 0.109846 | 7.84  |
| 2747   | 2016 | 0.388 | 0.01 | 0.889613 | 0.79141097 | 21.35503 | 0.051858 | 35.9  |

|        |      |       |      |          |            |          |          |       |
|--------|------|-------|------|----------|------------|----------|----------|-------|
| 600562 | 2016 | 0.411 | 0.01 | 0.889613 | 0.79141097 | 21.6175  | 0.135302 | 26.48 |
| 300172 | 2016 | -0.03 | 0.01 | 0.889613 | 0.79141097 | 21.26661 | 0.102676 | 28.98 |
| 600074 | 2016 | 0.403 | 0.01 | 0.889613 | 0.79141097 | 22.96845 | 0.170131 | 35.07 |
| 2747   | 2016 | 0.407 | 0.01 | 0.889613 | 0.79141097 | 21.35503 | 0.051858 | 35.9  |
| 2182   | 2016 | -0.27 | 0.01 | 0.889613 | 0.79141097 | 21.97212 | 0.122076 | 32.03 |
| 2090   | 2016 | 0.532 | 0.01 | 0.889613 | 0.79141097 | 22.06304 | 0.105423 | 36.92 |
| 300284 | 2016 | -0.29 | 0.01 | 0.889613 | 0.79141097 | 22.36288 | 0.127639 | 21.79 |
| 300284 | 2016 | -0.14 | 0.01 | 0.889613 | 0.79141097 | 22.91767 | 0.127639 | 21.79 |
| 300284 | 2016 | -0.03 | 0.01 | 0.889613 | 0.79141097 | 22.91767 | 0.127639 | 21.79 |
| 603518 | 2016 | -0.11 | 0.01 | 0.889613 | 0.79141097 | 21.19137 | 0.06874  | 32.66 |
| 727    | 2016 | 1.204 | 0.01 | 0.889613 | 0.79141097 | 24.24349 | 0.004559 | 24.51 |
| 2747   | 2016 | 0.407 | 0.01 | 0.889613 | 0.79141097 | 21.35503 | 0.051858 | 35.9  |
| 600074 | 2016 | 0.363 | 0.01 | 0.889613 | 0.79141097 | 22.96845 | 0.170131 | 35.07 |
| 2090   | 2016 | 0.436 | 0.01 | 0.889613 | 0.79141097 | 22.06304 | 0.105423 | 36.92 |
| 600959 | 2016 | 0.572 | 0.01 | 0.889613 | 0.79141097 | 24.17833 | 0.049153 | 18.04 |
| 300339 | 2016 | 1.224 | 0.01 | 0.889613 | 0.79141097 | 22.3575  | 0.086412 | 17.48 |
| 600501 | 2016 | 0.2   | 0.01 | 0.889613 | 0.79141097 | 22.27425 | 0.016463 | 25.2  |
| 2747   | 2016 | 0.112 | 0.01 | 0.889613 | 0.79141097 | 21.35503 | 0.051858 | 35.9  |
| 2546   | 2016 | 0.355 | 0.01 | 0.889613 | 0.79141097 | 21.87896 | 0.033611 | 41.86 |
| 600074 | 2016 | 0.21  | 0.01 | 0.889613 | 0.79141097 | 22.96845 | 0.170131 | 35.07 |
| 2090   | 2016 | 0.385 | 0.01 | 0.889613 | 0.79141097 | 22.06304 | 0.105423 | 36.92 |
| 603018 | 2016 | 0.793 | 0.01 | 0.889613 | 0.79141097 | 22.19558 | 0.109846 | 7.84  |
| 600562 | 2016 | 0.606 | 0.01 | 0.889613 | 0.79141097 | 21.6175  | 0.135302 | 26.48 |
| 600970 | 2016 | 0.016 | 0.01 | 0.889613 | 0.79141097 | 23.38753 | 0.070563 | 39.7  |
| 2182   | 2016 | -0.27 | 0.01 | 0.889613 | 0.79141097 | 21.97212 | 0.122076 | 32.03 |
| 2546   | 2016 | -0.03 | 0.01 | 0.889613 | 0.79141097 | 21.77893 | 0.033611 | 41.86 |
| 2747   | 2016 | 0.756 | 0.01 | 0.889613 | 0.79141097 | 21.35503 | 0.051858 | 35.9  |
| 300209 | 2016 | 1.719 | 0.01 | 0.889613 | 0.79141097 | 21.61999 | 0.044803 | 21.25 |
| 300447 | 2016 | 0.587 | 0.01 | 0.889613 | 0.79141097 | 20.69319 | 0.144824 | 55.82 |
| 600074 | 2016 | 0.363 | 0.01 | 0.889613 | 0.79141097 | 22.96845 | 0.170131 | 35.07 |
| 300356 | 2016 | 0.134 | 0.01 | 0.889613 | 0.79141097 | 21.54164 | 0.053296 | 25.64 |
| 2080   | 2016 | -0    | 0.01 | 0.889613 | 0.79141097 | 23.74744 | 0.051114 | 60.24 |
| 2182   | 2016 | -0.38 | 0.01 | 0.889613 | 0.79141097 | 21.74465 | 0.122076 | 32.03 |
| 2024   | 2016 | 0.398 | 0.01 | 0.889613 | 0.79141097 | 25.64447 | 0.007054 | 20.96 |
| 600562 | 2016 | 0.658 | 0.01 | 0.889613 | 0.79141097 | 21.17908 | 0.135302 | 26.48 |
| 600713 | 2016 | -0.99 | 0.01 | 0.889613 | 0.79141097 | 23.35959 | 0.077735 | 26.94 |
| 727    | 2016 | 0.134 | 0.01 | 0.889613 | 0.79141097 | 24.24349 | 0.004559 | 24.51 |
| 300209 | 2016 | 1.719 | 0.01 | 0.889613 | 0.79141097 | 21.61999 | 0.044803 | 21.25 |
| 727    | 2016 | 0.576 | 0.01 | 0.889613 | 0.79141097 | 24.24349 | 0.004559 | 24.51 |
| 2182   | 2016 | 0.648 | 0.01 | 0.889613 | 0.79141097 | 21.97212 | 0.122076 | 32.03 |
| 600562 | 2016 | 0.244 | 0.01 | 0.889613 | 0.79141097 | 21.6175  | 0.135302 | 26.48 |
| 600970 | 2016 | -0.15 | 0.01 | 0.889613 | 0.79141097 | 24.04829 | 0.070563 | 39.7  |
| 300356 | 2016 | 0.134 | 0.01 | 0.889613 | 0.79141097 | 21.54164 | 0.053296 | 25.64 |
| 300284 | 2016 | -0.52 | 0.01 | 0.889613 | 0.79141097 | 22.91767 | 0.127639 | 21.79 |
| 603018 | 2016 | -0.13 | 0.01 | 0.889613 | 0.79141097 | 22.09083 | 0.109846 | 7.84  |
| 2182   | 2016 | -0.68 | 0.01 | 0.889613 | 0.79141097 | 21.97212 | 0.122076 | 32.03 |
| 2329   | 2016 | -0.71 | 0.04 | 0.917018 | 0.84092287 | 22.3724  | 0.112839 | 31.4  |
| 2592   | 2016 | 0.356 | 0.04 | 0.917018 | 0.84092287 | 21.62856 | 0.062021 | 33.45 |
| 2696   | 2016 | 0.35  | 0.04 | 0.917018 | 0.84092287 | 21.37257 | 0.05995  | 44.03 |
| 2329   | 2016 | -0    | 0.04 | 0.917018 | 0.84092287 | 22.3724  | 0.112839 | 31.4  |
| 2696   | 2016 | -0.32 | 0.04 | 0.917018 | 0.84092287 | 21.37257 | 0.05995  | 44.03 |
| 300422 | 2016 | -0.11 | 0.04 | 0.917018 | 0.84092287 | 21.55512 | 0.060077 | 21.24 |
| 600236 | 2016 | 0.444 | 0.04 | 0.917018 | 0.84092287 | 24.40085 | 0.192007 | 59.55 |
| 911    | 2016 | 0.582 | 0.04 | 0.917018 | 0.84092287 | 22.62737 | 0.01193  | 42.2  |



|        |      |       |      |          |            |          |          |       |
|--------|------|-------|------|----------|------------|----------|----------|-------|
| 2592   | 2016 | 0.356 | 0.04 | 0.917018 | 0.84092287 | 21.62856 | 0.062021 | 33.45 |
| 2329   | 2016 | -0.71 | 0.04 | 0.917018 | 0.84092287 | 22.3724  | 0.112839 | 31.4  |
| 600236 | 2016 | 0.342 | 0.04 | 0.917018 | 0.84092287 | 24.40085 | 0.192007 | 59.55 |
| 600236 | 2016 | 0.404 | 0.04 | 0.917018 | 0.84092287 | 24.40085 | 0.192007 | 59.55 |
| 716    | 2016 | -0.95 | 0.04 | 0.917018 | 0.84092287 | 21.85972 | 0.013811 | 32.69 |
| 2592   | 2016 | -0.66 | 0.04 | 0.917018 | 0.84092287 | 21.61466 | 0.062021 | 33.45 |
| 2592   | 2016 | 0.356 | 0.04 | 0.917018 | 0.84092287 | 21.62856 | 0.062021 | 33.45 |
| 2592   | 2016 | -0.66 | 0.04 | 0.917018 | 0.84092287 | 21.62856 | 0.062021 | 33.45 |
| 2329   | 2016 | -0    | 0.04 | 0.917018 | 0.84092287 | 22.3724  | 0.112839 | 31.4  |
| 2696   | 2016 | -0.32 | 0.04 | 0.917018 | 0.84092287 | 21.37257 | 0.05995  | 44.03 |
| 2696   | 2016 | -0.32 | 0.04 | 0.917018 | 0.84092287 | 21.37257 | 0.05995  | 44.03 |
| 600236 | 2016 | 0.096 | 0.04 | 0.917018 | 0.84092287 | 24.40085 | 0.192007 | 59.55 |
| 2329   | 2016 | -0.54 | 0.04 | 0.917018 | 0.84092287 | 22.3724  | 0.112839 | 31.4  |
| 911    | 2016 | 0.582 | 0.04 | 0.917018 | 0.84092287 | 22.62737 | 0.01193  | 42.2  |
| 911    | 2016 | 0.582 | 0.04 | 0.917018 | 0.84092287 | 22.62737 | 0.01193  | 42.2  |
| 600236 | 2016 | 0.673 | 0.04 | 0.917018 | 0.84092287 | 24.40085 | 0.192007 | 59.55 |
| 300422 | 2016 | 0.346 | 0.04 | 0.917018 | 0.84092287 | 21.55512 | 0.060077 | 21.24 |
| 600236 | 2016 | 0.759 | 0.04 | 0.917018 | 0.84092287 | 24.40085 | 0.192007 | 59.55 |
| 2329   | 2016 | -0    | 0.04 | 0.917018 | 0.84092287 | 22.3724  | 0.112839 | 31.4  |
| 2696   | 2016 | -0.32 | 0.04 | 0.917018 | 0.84092287 | 21.37257 | 0.05995  | 44.03 |
| 2592   | 2016 | 0.042 | 0.04 | 0.917018 | 0.84092287 | 21.62856 | 0.062021 | 33.45 |
| 911    | 2016 | 0.582 | 0.04 | 0.917018 | 0.84092287 | 22.62737 | 0.01193  | 42.2  |
| 600236 | 2016 | 0.587 | 0.04 | 0.917018 | 0.84092287 | 24.40085 | 0.192007 | 59.55 |
| 2329   | 2016 | -0    | 0.04 | 0.917018 | 0.84092287 | 22.3724  | 0.112839 | 31.4  |
| 716    | 2016 | -0.95 | 0.04 | 0.917018 | 0.84092287 | 21.85972 | 0.013811 | 32.69 |
| 2329   | 2016 | -0    | 0.04 | 0.917018 | 0.84092287 | 22.05702 | 0.112839 | 31.4  |
| 911    | 2016 | 0.582 | 0.04 | 0.917018 | 0.84092287 | 22.57807 | 0.01193  | 42.2  |
| 600236 | 2016 | 0.673 | 0.04 | 0.917018 | 0.84092287 | 24.40085 | 0.192007 | 59.55 |
| 600236 | 2016 | 0.096 | 0.04 | 0.917018 | 0.84092287 | 24.40085 | 0.192007 | 59.55 |
| 300422 | 2016 | 0.346 | 0.04 | 0.917018 | 0.84092287 | 21.39678 | 0.060077 | 21.24 |
| 716    | 2016 | -0.95 | 0.04 | 0.917018 | 0.84092287 | 21.85972 | 0.013811 | 32.69 |
| 911    | 2016 | 0.582 | 0.04 | 0.917018 | 0.84092287 | 22.62737 | 0.01193  | 42.2  |
| 2696   | 2016 | -0.32 | 0.04 | 0.917018 | 0.84092287 | 21.37257 | 0.05995  | 44.03 |
| 2329   | 2016 | -0    | 0.04 | 0.917018 | 0.84092287 | 22.3724  | 0.112839 | 31.4  |
| 2696   | 2016 | 0.35  | 0.04 | 0.917018 | 0.84092287 | 20.90734 | 0.05995  | 44.03 |
| 716    | 2016 | -0.95 | 0.04 | 0.917018 | 0.84092287 | 21.85972 | 0.013811 | 32.69 |
| 300422 | 2016 | 0.345 | 0.04 | 0.917018 | 0.84092287 | 21.55512 | 0.060077 | 21.24 |
| 716    | 2016 | -0.95 | 0.04 | 0.917018 | 0.84092287 | 21.61701 | 0.013811 | 32.69 |
| 300422 | 2016 | 0.327 | 0.04 | 0.917018 | 0.84092287 | 21.55512 | 0.060077 | 21.24 |
| 600236 | 2016 | 0.538 | 0.04 | 0.917018 | 0.84092287 | 24.40085 | 0.192007 | 59.55 |
| 716    | 2016 | -0.95 | 0.04 | 0.917018 | 0.84092287 | 21.85972 | 0.013811 | 32.69 |
| 911    | 2016 | 0.582 | 0.04 | 0.917018 | 0.84092287 | 22.62737 | 0.01193  | 42.2  |
| 2329   | 2016 | -0    | 0.04 | 0.917018 | 0.84092287 | 22.3724  | 0.112839 | 31.4  |
| 600236 | 2016 | 0.096 | 0.04 | 0.917018 | 0.84092287 | 23.76981 | 0.192007 | 59.55 |
| 300422 | 2016 | 0.548 | 0.04 | 0.917018 | 0.84092287 | 21.55512 | 0.060077 | 21.24 |
| 600236 | 2016 | 0.428 | 0.04 | 0.917018 | 0.84092287 | 24.40085 | 0.192007 | 59.55 |
| 2696   | 2016 | 0.294 | 0.04 | 0.917018 | 0.84092287 | 21.37257 | 0.05995  | 44.03 |
| 600236 | 2016 | 0.391 | 0.04 | 0.917018 | 0.84092287 | 24.40085 | 0.192007 | 59.55 |
| 300174 | 2016 | -0.07 | 0.04 | 0.251314 | 0.06315883 | 20.82084 | 0.096137 | 32.84 |
| 600483 | 2016 | -0.63 | 0.04 | 0.251314 | 0.06315883 | 23.61079 | 0.101257 | 62.5  |
| 300174 | 2016 | -0.07 | 0.04 | 0.251314 | 0.06315883 | 20.59066 | 0.096137 | 32.84 |
| 600483 | 2016 | -0.41 | 0.04 | 0.251314 | 0.06315883 | 23.61079 | 0.101257 | 62.5  |
| 2300   | 2016 | -0.56 | 0.04 | 0.251314 | 0.06315883 | 21.7747  | 0.117824 | 22.31 |
| 2300   | 2016 | -0.55 | 0.04 | 0.251314 | 0.06315883 | 21.8455  | 0.117824 | 22.31 |

|        |      |       |      |          |            |          |          |       |
|--------|------|-------|------|----------|------------|----------|----------|-------|
| 300132 | 2016 | -0.22 | 0.04 | 0.251314 | 0.06315883 | 20.38825 | 0.051585 | 18.52 |
| 2300   | 2016 | -0.6  | 0.04 | 0.251314 | 0.06315883 | 21.8455  | 0.117824 | 22.31 |
| 600483 | 2016 | -0.63 | 0.04 | 0.251314 | 0.06315883 | 23.61079 | 0.101257 | 62.5  |
| 300174 | 2016 | -0.07 | 0.04 | 0.251314 | 0.06315883 | 20.59066 | 0.096137 | 32.84 |
| 600483 | 2016 | -0.63 | 0.04 | 0.251314 | 0.06315883 | 23.61079 | 0.101257 | 62.5  |
| 300132 | 2016 | -0.22 | 0.04 | 0.251314 | 0.06315883 | 20.37089 | 0.051585 | 18.52 |
| 2300   | 2016 | -0.6  | 0.04 | 0.251314 | 0.06315883 | 21.8455  | 0.117824 | 22.31 |
| 2300   | 2016 | -0.6  | 0.04 | 0.251314 | 0.06315883 | 21.8455  | 0.117824 | 22.31 |
| 300174 | 2016 | -0.07 | 0.04 | 0.251314 | 0.06315883 | 20.59066 | 0.096137 | 32.84 |
| 600483 | 2016 | -0.27 | 0.04 | 0.251314 | 0.06315883 | 23.61079 | 0.101257 | 62.5  |
| 300132 | 2016 | -0.22 | 0.04 | 0.251314 | 0.06315883 | 20.38825 | 0.051585 | 18.52 |
| 300174 | 2016 | -0.07 | 0.04 | 0.251314 | 0.06315883 | 20.59066 | 0.096137 | 32.84 |
| 2300   | 2016 | -0.55 | 0.04 | 0.251314 | 0.06315883 | 21.8455  | 0.117824 | 22.31 |
| 600483 | 2016 | -0.63 | 0.04 | 0.251314 | 0.06315883 | 23.61079 | 0.101257 | 62.5  |
| 300174 | 2016 | -0.07 | 0.04 | 0.251314 | 0.06315883 | 20.59066 | 0.096137 | 32.84 |
| 600483 | 2016 | -0.41 | 0.04 | 0.251314 | 0.06315883 | 22.96154 | 0.101257 | 62.5  |
| 300174 | 2016 | -0.07 | 0.04 | 0.251314 | 0.06315883 | 20.59066 | 0.096137 | 32.84 |
| 600590 | 2016 | -0.06 | 0.02 | 1.95559  | 3.8243317  | 22.8736  | 0.034957 | 15.37 |
| 2591   | 2016 | -0.46 | 0.02 | 1.95559  | 3.8243317  | 20.64308 | 0.009713 | 25.93 |
| 2591   | 2016 | -0.46 | 0.02 | 1.95559  | 3.8243317  | 20.64308 | 0.009713 | 25.93 |
| 990    | 2016 | -0.31 | 0.02 | 1.95559  | 3.8243317  | 23.72648 | 0.009405 | 33.44 |
| 600363 | 2016 | -0.41 | 0.02 | 1.95559  | 3.8243317  | 22.07429 | 0.077889 | 21.73 |
| 2591   | 2016 | -0.46 | 0.02 | 1.95559  | 3.8243317  | 20.64308 | 0.009713 | 25.93 |
| 600750 | 2016 | 0.679 | 0.02 | 1.95559  | 3.8243317  | 21.84356 | 0.14518  | 43.03 |
| 600590 | 2016 | -0.06 | 0.02 | 1.95559  | 3.8243317  | 22.8736  | 0.034957 | 15.37 |
| 2036   | 2016 | -0.56 | 0.02 | 1.95559  | 3.8243317  | 22.07535 | 0.128294 | 13.81 |
| 600507 | 2016 | -0.81 | 0.02 | 1.95559  | 3.8243317  | 22.86063 | 0.237075 | 39.62 |
| 600507 | 2016 | -0.9  | 0.02 | 1.95559  | 3.8243317  | 22.86063 | 0.237075 | 39.62 |
| 600590 | 2016 | 0.732 | 0.02 | 1.95559  | 3.8243317  | 22.8736  | 0.034957 | 15.37 |
| 2036   | 2016 | -0.11 | 0.02 | 1.95559  | 3.8243317  | 22.07535 | 0.128294 | 13.81 |
| 820    | 2016 | 0.745 | 0.02 | 1.95559  | 3.8243317  | 20.91156 | 0.302158 | 54.83 |
| 600590 | 2016 | 0.379 | 0.02 | 1.95559  | 3.8243317  | 22.8736  | 0.034957 | 15.37 |
| 2157   | 2016 | -0.58 | 0.02 | 1.95559  | 3.8243317  | 23.22952 | 0.16695  | 24.62 |
| 300453 | 2016 | -0.34 | 0.02 | 1.95559  | 3.8243317  | 20.27622 | 0.066256 | 30.1  |
| 600590 | 2016 | 0.252 | 0.02 | 1.95559  | 3.8243317  | 22.8736  | 0.034957 | 15.37 |
| 600750 | 2016 | 0.508 | 0.02 | 1.95559  | 3.8243317  | 21.84356 | 0.14518  | 43.03 |
| 650    | 2016 | -0.9  | 0.02 | 1.95559  | 3.8243317  | 22.0752  | 0.134434 | 26.27 |
| 600590 | 2016 | 0.6   | 0.02 | 1.95559  | 3.8243317  | 22.8736  | 0.034957 | 15.37 |
| 820    | 2016 | 0.745 | 0.02 | 1.95559  | 3.8243317  | 20.91156 | 0.302158 | 54.83 |
| 550    | 2016 | -0.12 | 0.02 | 1.95559  | 3.8243317  | 23.83226 | 0.106213 | 41.03 |
| 600590 | 2016 | 1.262 | 0.02 | 1.95559  | 3.8243317  | 22.8736  | 0.034957 | 15.37 |
| 600363 | 2016 | -0.29 | 0.02 | 1.95559  | 3.8243317  | 22.07429 | 0.077889 | 21.73 |
| 600507 | 2016 | -0.83 | 0.02 | 1.95559  | 3.8243317  | 22.76281 | 0.237075 | 39.62 |
| 2157   | 2016 | -0.24 | 0.02 | 1.95559  | 3.8243317  | 23.22952 | 0.16695  | 24.62 |
| 650    | 2016 | -0.9  | 0.02 | 1.95559  | 3.8243317  | 22.0752  | 0.134434 | 26.27 |
| 990    | 2016 | 0.419 | 0.02 | 1.95559  | 3.8243317  | 23.72648 | 0.009405 | 33.44 |
| 2036   | 2016 | -0.56 | 0.02 | 1.95559  | 3.8243317  | 22.07535 | 0.128294 | 13.81 |
| 2157   | 2016 | -0.85 | 0.02 | 1.95559  | 3.8243317  | 23.22952 | 0.16695  | 24.62 |
| 550    | 2016 | -0.17 | 0.02 | 1.95559  | 3.8243317  | 23.92169 | 0.106213 | 41.03 |
| 990    | 2016 | -0.79 | 0.02 | 1.95559  | 3.8243317  | 23.72648 | 0.009405 | 33.44 |
| 600507 | 2016 | -0.83 | 0.02 | 1.95559  | 3.8243317  | 22.86063 | 0.237075 | 39.62 |
| 600507 | 2016 | -0.83 | 0.02 | 1.95559  | 3.8243317  | 22.86063 | 0.237075 | 39.62 |
| 2157   | 2016 | -0.24 | 0.02 | 1.95559  | 3.8243317  | 23.22952 | 0.16695  | 24.62 |
| 2695   | 2016 | -0.12 | 0.02 | 1.95559  | 3.8243317  | 21.37243 | 0.057791 | 51.59 |

|        |      |       |      |         |           |          |          |       |
|--------|------|-------|------|---------|-----------|----------|----------|-------|
| 550    | 2016 | -0.17 | 0.02 | 1.95559 | 3.8243317 | 23.92169 | 0.106213 | 41.03 |
| 820    | 2016 | 0.745 | 0.02 | 1.95559 | 3.8243317 | 21.98261 | 0.302158 | 54.83 |
| 600316 | 2016 | -0.47 | 0.02 | 1.95559 | 3.8243317 | 23.08774 | 0.002468 | 43.77 |
| 600363 | 2016 | -0.51 | 0.02 | 1.95559 | 3.8243317 | 22.07429 | 0.077889 | 21.73 |
| 2157   | 2016 | -0.85 | 0.02 | 1.95559 | 3.8243317 | 23.22952 | 0.16695  | 24.62 |
| 600363 | 2016 | -0.51 | 0.02 | 1.95559 | 3.8243317 | 22.07429 | 0.077889 | 21.73 |
| 600363 | 2016 | -0.51 | 0.02 | 1.95559 | 3.8243317 | 22.07429 | 0.077889 | 21.73 |
| 300453 | 2016 | -0.34 | 0.02 | 1.95559 | 3.8243317 | 20.25369 | 0.066256 | 30.1  |
| 300453 | 2016 | -0.23 | 0.02 | 1.95559 | 3.8243317 | 20.25369 | 0.066256 | 30.1  |
| 2591   | 2016 | -0.46 | 0.02 | 1.95559 | 3.8243317 | 20.64308 | 0.009713 | 25.93 |
| 2591   | 2016 | -0.46 | 0.02 | 1.95559 | 3.8243317 | 20.64308 | 0.009713 | 25.93 |
| 600363 | 2016 | -0.51 | 0.02 | 1.95559 | 3.8243317 | 22.07429 | 0.077889 | 21.73 |
| 600316 | 2016 | -0.46 | 0.02 | 1.95559 | 3.8243317 | 23.08774 | 0.002468 | 43.77 |
| 600590 | 2016 | 0.11  | 0.02 | 1.95559 | 3.8243317 | 22.8736  | 0.034957 | 15.37 |
| 600363 | 2016 | -0.32 | 0.02 | 1.95559 | 3.8243317 | 22.07429 | 0.077889 | 21.73 |
| 600507 | 2016 | -0.87 | 0.02 | 1.95559 | 3.8243317 | 22.86063 | 0.237075 | 39.62 |
| 600750 | 2016 | 0.508 | 0.02 | 1.95559 | 3.8243317 | 21.84356 | 0.14518  | 43.03 |
| 2591   | 2016 | -0.46 | 0.02 | 1.95559 | 3.8243317 | 20.59278 | 0.009713 | 25.93 |
| 600363 | 2016 | -0.04 | 0.02 | 1.95559 | 3.8243317 | 22.07429 | 0.077889 | 21.73 |
| 990    | 2016 | -0.27 | 0.02 | 1.95559 | 3.8243317 | 23.72648 | 0.009405 | 33.44 |
| 550    | 2016 | 0.386 | 0.02 | 1.95559 | 3.8243317 | 23.92169 | 0.106213 | 41.03 |
| 600507 | 2016 | -0.97 | 0.02 | 1.95559 | 3.8243317 | 22.86063 | 0.237075 | 39.62 |
| 600590 | 2016 | 0.211 | 0.02 | 1.95559 | 3.8243317 | 22.8736  | 0.034957 | 15.37 |
| 600316 | 2016 | -0.47 | 0.02 | 1.95559 | 3.8243317 | 23.08774 | 0.002468 | 43.77 |
| 600507 | 2016 | -0.97 | 0.02 | 1.95559 | 3.8243317 | 22.86063 | 0.237075 | 39.62 |
| 600590 | 2016 | 0.206 | 0.02 | 1.95559 | 3.8243317 | 22.8736  | 0.034957 | 15.37 |
| 990    | 2016 | 0.534 | 0.02 | 1.95559 | 3.8243317 | 23.72648 | 0.009405 | 33.44 |
| 600590 | 2016 | 0.379 | 0.02 | 1.95559 | 3.8243317 | 22.8736  | 0.034957 | 15.37 |
| 2591   | 2016 | -0.46 | 0.02 | 1.95559 | 3.8243317 | 20.64308 | 0.009713 | 25.93 |
| 2036   | 2016 | -0.12 | 0.02 | 1.95559 | 3.8243317 | 21.96543 | 0.128294 | 13.81 |
| 600363 | 2016 | -0.51 | 0.02 | 1.95559 | 3.8243317 | 22.07429 | 0.077889 | 21.73 |
| 2157   | 2016 | -0.12 | 0.02 | 1.95559 | 3.8243317 | 23.22952 | 0.16695  | 24.62 |
| 600316 | 2016 | -0.47 | 0.02 | 1.95559 | 3.8243317 | 23.08136 | 0.002468 | 43.77 |
| 600750 | 2016 | 0.679 | 0.02 | 1.95559 | 3.8243317 | 21.84225 | 0.14518  | 43.03 |
| 600590 | 2016 | -0.06 | 0.02 | 1.95559 | 3.8243317 | 22.8736  | 0.034957 | 15.37 |
| 2695   | 2016 | -0.33 | 0.02 | 1.95559 | 3.8243317 | 21.37243 | 0.057791 | 51.59 |
| 2157   | 2016 | -0.24 | 0.02 | 1.95559 | 3.8243317 | 23.22952 | 0.16695  | 24.62 |
| 2036   | 2016 | -0.29 | 0.02 | 1.95559 | 3.8243317 | 22.07535 | 0.128294 | 13.81 |
| 2695   | 2016 | 0.615 | 0.02 | 1.95559 | 3.8243317 | 21.37243 | 0.057791 | 51.59 |
| 300453 | 2016 | 0.056 | 0.02 | 1.95559 | 3.8243317 | 20.27622 | 0.066256 | 30.1  |
| 2157   | 2016 | -0.24 | 0.02 | 1.95559 | 3.8243317 | 23.22952 | 0.16695  | 24.62 |
| 600363 | 2016 | -0.47 | 0.02 | 1.95559 | 3.8243317 | 22.07429 | 0.077889 | 21.73 |
| 600750 | 2016 | 0.603 | 0.02 | 1.95559 | 3.8243317 | 21.84356 | 0.14518  | 43.03 |
| 600590 | 2016 | 0.131 | 0.02 | 1.95559 | 3.8243317 | 22.8736  | 0.034957 | 15.37 |
| 650    | 2016 | -0.9  | 0.02 | 1.95559 | 3.8243317 | 21.65262 | 0.134434 | 26.27 |
| 600363 | 2016 | -0.32 | 0.02 | 1.95559 | 3.8243317 | 22.07429 | 0.077889 | 21.73 |
| 600363 | 2016 | -0.51 | 0.02 | 1.95559 | 3.8243317 | 21.68242 | 0.077889 | 21.73 |
| 600363 | 2016 | -0.51 | 0.02 | 1.95559 | 3.8243317 | 22.07429 | 0.077889 | 21.73 |
| 600590 | 2016 | 0.379 | 0.02 | 1.95559 | 3.8243317 | 22.8736  | 0.034957 | 15.37 |
| 300453 | 2016 | 0.056 | 0.02 | 1.95559 | 3.8243317 | 20.27622 | 0.066256 | 30.1  |
| 600590 | 2016 | 1.262 | 0.02 | 1.95559 | 3.8243317 | 22.8736  | 0.034957 | 15.37 |
| 600750 | 2016 | 0.508 | 0.02 | 1.95559 | 3.8243317 | 21.84356 | 0.14518  | 43.03 |
| 600363 | 2016 | -0.19 | 0.02 | 1.95559 | 3.8243317 | 22.07429 | 0.077889 | 21.73 |
| 600507 | 2016 | -0.83 | 0.02 | 1.95559 | 3.8243317 | 22.86063 | 0.237075 | 39.62 |

|        |      |       |      |          |            |          |          |       |
|--------|------|-------|------|----------|------------|----------|----------|-------|
| 600590 | 2016 | 0.019 | 0.02 | 1.95559  | 3.8243317  | 22.8736  | 0.034957 | 15.37 |
| 650    | 2016 | -0.9  | 0.02 | 1.95559  | 3.8243317  | 22.0752  | 0.134434 | 26.27 |
| 2036   | 2016 | 0.438 | 0.02 | 1.95559  | 3.8243317  | 22.07535 | 0.128294 | 13.81 |
| 600363 | 2016 | -0.51 | 0.02 | 1.95559  | 3.8243317  | 22.07429 | 0.077889 | 21.73 |
| 600750 | 2016 | 0.508 | 0.02 | 1.95559  | 3.8243317  | 21.84356 | 0.14518  | 43.03 |
| 2036   | 2016 | -0.02 | 0.02 | 1.95559  | 3.8243317  | 22.07535 | 0.128294 | 13.81 |
| 990    | 2016 | 0.534 | 0.02 | 1.95559  | 3.8243317  | 23.72648 | 0.009405 | 33.44 |
| 600750 | 2016 | 0.508 | 0.02 | 1.95559  | 3.8243317  | 21.84356 | 0.14518  | 43.03 |
| 550    | 2016 | 0.386 | 0.02 | 1.95559  | 3.8243317  | 23.92169 | 0.106213 | 41.03 |
| 2157   | 2016 | -0.24 | 0.02 | 1.95559  | 3.8243317  | 23.22952 | 0.16695  | 24.62 |
| 600750 | 2016 | 0.508 | 0.02 | 1.95559  | 3.8243317  | 21.84356 | 0.14518  | 43.03 |
| 2036   | 2016 | -0.28 | 0.02 | 1.95559  | 3.8243317  | 22.07535 | 0.128294 | 13.81 |
| 2695   | 2016 | 0.615 | 0.02 | 1.95559  | 3.8243317  | 21.37243 | 0.057791 | 51.59 |
| 600507 | 2016 | -0.83 | 0.02 | 1.95559  | 3.8243317  | 22.86063 | 0.237075 | 39.62 |
| 600590 | 2016 | 0.174 | 0.02 | 1.95559  | 3.8243317  | 22.8736  | 0.034957 | 15.37 |
| 2157   | 2016 | 0.395 | 0.02 | 1.95559  | 3.8243317  | 23.0303  | 0.16695  | 24.62 |
| 600590 | 2016 | 0.157 | 0.02 | 1.95559  | 3.8243317  | 22.8736  | 0.034957 | 15.37 |
| 600590 | 2016 | 0.205 | 0.02 | 1.95559  | 3.8243317  | 22.8736  | 0.034957 | 15.37 |
| 600750 | 2016 | 0.679 | 0.02 | 1.95559  | 3.8243317  | 21.84356 | 0.14518  | 43.03 |
| 600590 | 2016 | 0.252 | 0.02 | 1.95559  | 3.8243317  | 22.64583 | 0.034957 | 15.37 |
| 2157   | 2016 | -0.24 | 0.02 | 1.95559  | 3.8243317  | 23.22952 | 0.16695  | 24.62 |
| 600363 | 2016 | -0.51 | 0.02 | 1.95559  | 3.8243317  | 22.07429 | 0.077889 | 21.73 |
| 2157   | 2016 | -0.58 | 0.02 | 1.95559  | 3.8243317  | 23.22952 | 0.16695  | 24.62 |
| 990    | 2016 | -0.6  | 0.02 | 1.95559  | 3.8243317  | 23.72648 | 0.009405 | 33.44 |
| 2591   | 2016 | -0.46 | 0.02 | 1.95559  | 3.8243317  | 20.64308 | 0.009713 | 25.93 |
| 2695   | 2016 | -0.33 | 0.02 | 1.95559  | 3.8243317  | 21.24703 | 0.057791 | 51.59 |
| 600316 | 2016 | -0.46 | 0.02 | 1.95559  | 3.8243317  | 23.08774 | 0.002468 | 43.77 |
| 990    | 2016 | -0.31 | 0.02 | 1.95559  | 3.8243317  | 23.47573 | 0.009405 | 33.44 |
| 600363 | 2016 | -0.51 | 0.02 | 1.95559  | 3.8243317  | 22.07429 | 0.077889 | 21.73 |
| 2239   | 2016 | -0.61 | 0.01 | 0.096004 | 0.00921669 | 22.84403 | 0.092013 | 16.07 |
| 300421 | 2016 | -0.04 | 0.01 | 0.096004 | 0.00921669 | 20.99313 | 0.050512 | 27.6  |
| 2722   | 2016 | 0.515 | 0.01 | 0.096004 | 0.00921669 | 21.57312 | 0.074995 | 36.05 |
| 300265 | 2016 | -0.13 | 0.01 | 0.096004 | 0.00921669 | 21.43014 | 0.131135 | 55.19 |
| 2484   | 2016 | -0.01 | 0.01 | 0.096004 | 0.00921669 | 21.96971 | 0.051632 | 31.84 |
| 2438   | 2016 | -0.03 | 0.01 | 0.096004 | 0.00921669 | 21.3899  | 0.042334 | 20.46 |
| 2483   | 2016 | 0.256 | 0.01 | 0.096004 | 0.00921669 | 22.26286 | 0.049687 | 43.47 |
| 2239   | 2016 | -0.87 | 0.01 | 0.096004 | 0.00921669 | 22.84403 | 0.092013 | 16.07 |
| 2239   | 2016 | -0.75 | 0.01 | 0.096004 | 0.00921669 | 22.84403 | 0.092013 | 16.07 |
| 601222 | 2016 | -0.03 | 0.01 | 0.096004 | 0.00921669 | 23.26113 | 0.060454 | 40.63 |
| 2349   | 2016 | 0.311 | 0.01 | 0.096004 | 0.00921669 | 21.65168 | 0.075331 | 34.09 |
| 600770 | 2016 | 0.377 | 0.01 | 0.096004 | 0.00921669 | 22.56853 | 0.021031 | 24.72 |
| 300280 | 2016 | -0.4  | 0.01 | 0.096004 | 0.00921669 | 20.51574 | 0.003521 | 26.17 |
| 2483   | 2016 | 0.103 | 0.01 | 0.096004 | 0.00921669 | 22.26286 | 0.049687 | 43.47 |
| 2156   | 2016 | 0.474 | 0.01 | 0.096004 | 0.00921669 | 23.13946 | 0.03854  | 31.25 |
| 2293   | 2016 | -0.06 | 0.01 | 0.096004 | 0.00921669 | 22.16032 | 0.117633 | 17.81 |
| 600770 | 2016 | -0.33 | 0.01 | 0.096004 | 0.00921669 | 22.56853 | 0.021031 | 24.72 |
| 2483   | 2016 | -0.41 | 0.01 | 0.096004 | 0.00921669 | 22.26286 | 0.049687 | 43.47 |
| 2484   | 2016 | -0.05 | 0.01 | 0.096004 | 0.00921669 | 21.96971 | 0.051632 | 31.84 |
| 600770 | 2016 | 0.328 | 0.01 | 0.096004 | 0.00921669 | 22.56853 | 0.021031 | 24.72 |
| 2484   | 2016 | 0.235 | 0.01 | 0.096004 | 0.00921669 | 21.87116 | 0.051632 | 31.84 |
| 2074   | 2016 | 0.09  | 0.01 | 0.096004 | 0.00921669 | 23.0471  | 0.260821 | 24.79 |
| 600522 | 2016 | 0.671 | 0.01 | 0.096004 | 0.00921669 | 23.74137 | 0.131933 | 29.42 |
| 300280 | 2016 | -0.4  | 0.01 | 0.096004 | 0.00921669 | 20.53005 | 0.003521 | 26.17 |
| 600389 | 2016 | -0.89 | 0.01 | 0.096004 | 0.00921669 | 21.88176 | 0.038104 | 29.19 |

|        |      |       |      |          |            |          |          |       |
|--------|------|-------|------|----------|------------|----------|----------|-------|
| 601222 | 2016 | -0.03 | 0.01 | 0.096004 | 0.00921669 | 23.26113 | 0.060454 | 40.63 |
| 300280 | 2016 | -0.4  | 0.01 | 0.096004 | 0.00921669 | 20.53005 | 0.003521 | 26.17 |
| 2394   | 2016 | 0.556 | 0.01 | 0.096004 | 0.00921669 | 22.27617 | 0.133085 | 40.45 |
| 35     | 2016 | -0.43 | 0.01 | 0.096004 | 0.00921669 | 22.51477 | 0.102656 | 32.29 |
| 2394   | 2016 | -0.77 | 0.01 | 0.096004 | 0.00921669 | 22.27617 | 0.133085 | 40.45 |
| 2394   | 2016 | 0.556 | 0.01 | 0.096004 | 0.00921669 | 22.10292 | 0.133085 | 40.45 |
| 300091 | 2016 | -0.23 | 0.01 | 0.096004 | 0.00921669 | 21.65688 | 0.043402 | 18.42 |
| 300265 | 2016 | 0.088 | 0.01 | 0.096004 | 0.00921669 | 21.43014 | 0.131135 | 55.19 |
| 2722   | 2016 | -0.81 | 0.01 | 0.096004 | 0.00921669 | 21.57312 | 0.074995 | 36.05 |
| 600522 | 2016 | -0.03 | 0.01 | 0.096004 | 0.00921669 | 23.74137 | 0.131933 | 29.42 |
| 2044   | 2016 | 0.332 | 0.01 | 0.096004 | 0.00921669 | 22.51329 | 0.080085 | 11.22 |
| 600389 | 2016 | 0.436 | 0.01 | 0.096004 | 0.00921669 | 21.90337 | 0.038104 | 29.19 |
| 2722   | 2016 | -0.37 | 0.01 | 0.096004 | 0.00921669 | 21.57312 | 0.074995 | 36.05 |
| 2074   | 2016 | 0.245 | 0.01 | 0.096004 | 0.00921669 | 23.0471  | 0.260821 | 24.79 |
| 600862 | 2016 | 0.347 | 0.01 | 0.096004 | 0.00921669 | 21.95598 | 0.019803 | 42.86 |
| 600862 | 2016 | 0.687 | 0.01 | 0.096004 | 0.00921669 | 22.86624 | 0.019803 | 42.86 |
| 2239   | 2016 | -0.87 | 0.01 | 0.096004 | 0.00921669 | 22.84403 | 0.092013 | 16.07 |
| 600770 | 2016 | 0.225 | 0.01 | 0.096004 | 0.00921669 | 22.56853 | 0.021031 | 24.72 |
| 300265 | 2016 | -0.57 | 0.01 | 0.096004 | 0.00921669 | 21.43014 | 0.131135 | 55.19 |
| 35     | 2016 | -0.43 | 0.01 | 0.096004 | 0.00921669 | 22.51477 | 0.102656 | 32.29 |
| 600770 | 2016 | -0    | 0.01 | 0.096004 | 0.00921669 | 22.56853 | 0.021031 | 24.72 |
| 2044   | 2016 | 0.332 | 0.01 | 0.096004 | 0.00921669 | 22.52179 | 0.080085 | 11.22 |
| 600389 | 2016 | 0.436 | 0.01 | 0.096004 | 0.00921669 | 21.90337 | 0.038104 | 29.19 |
| 2484   | 2016 | -0.42 | 0.01 | 0.096004 | 0.00921669 | 21.96971 | 0.051632 | 31.84 |
| 2438   | 2016 | -0.03 | 0.01 | 0.096004 | 0.00921669 | 21.3899  | 0.042334 | 20.46 |
| 600862 | 2016 | 0.687 | 0.01 | 0.096004 | 0.00921669 | 22.86624 | 0.019803 | 42.86 |
| 600862 | 2016 | 0.502 | 0.01 | 0.096004 | 0.00921669 | 22.86624 | 0.019803 | 42.86 |
| 603968 | 2016 | 0.722 | 0.01 | 0.096004 | 0.00921669 | 21.27941 | 0.116972 | 9.98  |
| 35     | 2016 | -0.43 | 0.01 | 0.096004 | 0.00921669 | 22.51477 | 0.063031 | 32.29 |
| 601222 | 2016 | -0.29 | 0.01 | 0.096004 | 0.00921669 | 22.93086 | 0.060454 | 40.63 |
| 2239   | 2016 | -0.71 | 0.01 | 0.096004 | 0.00921669 | 22.84403 | 0.092013 | 16.07 |
| 600522 | 2016 | 0.128 | 0.01 | 0.096004 | 0.00921669 | 23.74137 | 0.131933 | 29.42 |
| 2438   | 2016 | -0.01 | 0.01 | 0.096004 | 0.00921669 | 21.3899  | 0.042334 | 20.46 |
| 2394   | 2016 | -0.03 | 0.01 | 0.096004 | 0.00921669 | 22.27617 | 0.133085 | 40.45 |
| 600389 | 2016 | 0.436 | 0.01 | 0.096004 | 0.00921669 | 21.90337 | 0.038104 | 29.19 |
| 2722   | 2016 | -0.28 | 0.01 | 0.096004 | 0.00921669 | 21.57312 | 0.074995 | 36.05 |
| 2156   | 2016 | 0.679 | 0.01 | 0.096004 | 0.00921669 | 23.13946 | 0.03854  | 31.25 |
| 2722   | 2016 | 0.171 | 0.01 | 0.096004 | 0.00921669 | 21.57312 | 0.074995 | 36.05 |
| 300265 | 2016 | -0.57 | 0.01 | 0.096004 | 0.00921669 | 21.43014 | 0.131135 | 55.19 |
| 601222 | 2016 | -0.03 | 0.01 | 0.096004 | 0.00921669 | 23.26113 | 0.060454 | 40.63 |
| 2074   | 2016 | 0.111 | 0.01 | 0.096004 | 0.00921669 | 23.0471  | 0.260821 | 24.79 |
| 2483   | 2016 | -0.19 | 0.01 | 0.096004 | 0.00921669 | 22.26286 | 0.049687 | 43.47 |
| 300091 | 2016 | -0.23 | 0.01 | 0.096004 | 0.00921669 | 21.65688 | 0.043402 | 18.42 |
| 2156   | 2016 | -0.01 | 0.01 | 0.096004 | 0.00921669 | 23.13946 | 0.03854  | 31.25 |
| 600770 | 2016 | -0.11 | 0.01 | 0.096004 | 0.00921669 | 22.56853 | 0.021031 | 24.72 |
| 2156   | 2016 | 0.583 | 0.01 | 0.096004 | 0.00921669 | 23.13946 | 0.03854  | 31.25 |
| 2074   | 2016 | 0.175 | 0.01 | 0.096004 | 0.00921669 | 23.0471  | 0.260821 | 24.79 |
| 601222 | 2016 | -0.5  | 0.01 | 0.096004 | 0.00921669 | 23.26113 | 0.060454 | 40.63 |
| 600522 | 2016 | 0.008 | 0.01 | 0.096004 | 0.00921669 | 23.74137 | 0.131933 | 29.42 |
| 2349   | 2016 | 0.808 | 0.01 | 0.096004 | 0.00921669 | 21.65168 | 0.075331 | 34.09 |
| 600522 | 2016 | -0.15 | 0.01 | 0.096004 | 0.00921669 | 23.74137 | 0.131933 | 29.42 |
| 2483   | 2016 | -0.03 | 0.01 | 0.096004 | 0.00921669 | 22.26286 | 0.049687 | 43.47 |
| 2484   | 2016 | 0.174 | 0.01 | 0.096004 | 0.00921669 | 21.96971 | 0.051632 | 31.84 |
| 601222 | 2016 | 0.001 | 0.01 | 0.096004 | 0.00921669 | 23.26113 | 0.060454 | 40.63 |

|        |      |       |      |          |            |          |          |       |
|--------|------|-------|------|----------|------------|----------|----------|-------|
| 600522 | 2016 | -0.65 | 0.01 | 0.096004 | 0.00921669 | 23.74137 | 0.131933 | 29.42 |
| 600389 | 2016 | 0.093 | 0.01 | 0.096004 | 0.00921669 | 21.90337 | 0.038104 | 29.19 |
| 2394   | 2016 | 0.556 | 0.01 | 0.096004 | 0.00921669 | 22.27617 | 0.133085 | 40.45 |
| 2239   | 2016 | -0.73 | 0.01 | 0.096004 | 0.00921669 | 22.84403 | 0.092013 | 16.07 |
| 300265 | 2016 | -0.21 | 0.01 | 0.096004 | 0.00921669 | 21.43014 | 0.131135 | 55.19 |
| 600862 | 2016 | 0.347 | 0.01 | 0.096004 | 0.00921669 | 22.86624 | 0.019803 | 42.86 |
| 300421 | 2016 | -0.04 | 0.01 | 0.096004 | 0.00921669 | 20.96252 | 0.050512 | 27.6  |
| 2483   | 2016 | 0.256 | 0.01 | 0.096004 | 0.00921669 | 21.74009 | 0.049687 | 43.47 |
| 2576   | 2016 | -0.04 | 0.01 | 0.096004 | 0.00921669 | 20.70511 | -0.00656 | 24.01 |
| 600522 | 2016 | -0.12 | 0.01 | 0.096004 | 0.00921669 | 23.74137 | 0.131933 | 29.42 |
| 2484   | 2016 | 0.174 | 0.01 | 0.096004 | 0.00921669 | 21.96971 | 0.051632 | 31.84 |
| 2349   | 2016 | -0.35 | 0.01 | 0.096004 | 0.00921669 | 21.65168 | 0.075331 | 34.09 |
| 600522 | 2016 | -0.42 | 0.01 | 0.096004 | 0.00921669 | 23.74137 | 0.131933 | 29.42 |
| 2074   | 2016 | 0.862 | 0.01 | 0.096004 | 0.00921669 | 23.0471  | 0.260821 | 24.79 |
| 300091 | 2016 | -0.36 | 0.01 | 0.096004 | 0.00921669 | 21.65688 | 0.043402 | 18.42 |
| 300091 | 2016 | -0.29 | 0.01 | 0.096004 | 0.00921669 | 21.65688 | 0.043402 | 18.42 |
| 600862 | 2016 | 0.687 | 0.01 | 0.096004 | 0.00921669 | 22.86624 | 0.019803 | 42.86 |
| 35     | 2016 | -0.43 | 0.01 | 0.096004 | 0.00921669 | 22.02718 | 0.102656 | 32.29 |
| 2293   | 2016 | -0.06 | 0.01 | 0.096004 | 0.00921669 | 22.16032 | 0.117633 | 17.81 |
| 2201   | 2016 | -0    | 0.01 | 0.096004 | 0.00921669 | 21.45536 | 0.004442 | 46.85 |
| 600522 | 2016 | -0.18 | 0.01 | 0.096004 | 0.00921669 | 23.74137 | 0.131933 | 29.42 |
| 2239   | 2016 | 0.279 | 0.01 | 0.096004 | 0.00921669 | 22.84403 | 0.092013 | 16.07 |
| 2394   | 2016 | -0.16 | 0.01 | 0.096004 | 0.00921669 | 22.27617 | 0.133085 | 40.45 |
| 300280 | 2016 | -0.4  | 0.01 | 0.096004 | 0.00921669 | 20.53005 | 0.003521 | 26.17 |
| 601222 | 2016 | -0.2  | 0.01 | 0.096004 | 0.00921669 | 23.26113 | 0.060454 | 40.63 |
| 2484   | 2016 | 0.235 | 0.01 | 0.096004 | 0.00921669 | 21.96971 | 0.051632 | 31.84 |
| 600770 | 2016 | -0.11 | 0.01 | 0.096004 | 0.00921669 | 22.05725 | 0.021031 | 24.72 |
| 600522 | 2016 | -0.65 | 0.01 | 0.096004 | 0.00921669 | 23.74137 | 0.131933 | 29.42 |
| 601222 | 2016 | -0.03 | 0.01 | 0.096004 | 0.00921669 | 23.26113 | 0.060454 | 40.63 |
| 2349   | 2016 | 0.164 | 0.01 | 0.096004 | 0.00921669 | 21.65168 | 0.075331 | 34.09 |
| 300091 | 2016 | -0.23 | 0.01 | 0.096004 | 0.00921669 | 21.65688 | 0.043402 | 18.42 |
| 2576   | 2016 | 0.18  | 0.01 | 0.096004 | 0.00921669 | 20.70511 | -0.00656 | 24.01 |
| 300265 | 2016 | -0.24 | 0.01 | 0.096004 | 9.22E-03   | 21.43014 | 0.131135 | 55.19 |
| 2576   | 2016 | -0.57 | 0.01 | 0.096004 | 9.22E-03   | 20.70511 | -0.00656 | 24.01 |
| 600522 | 2016 | 0.339 | 0.01 | 0.096004 | 9.22E-03   | 23.74137 | 0.131933 | 29.42 |
| 2484   | 2016 | -0.2  | 0.01 | 0.096004 | 9.22E-03   | 21.96971 | 0.051632 | 31.84 |
| 2293   | 2016 | 0.468 | 0.01 | 0.096004 | 9.22E-03   | 22.16032 | 0.117633 | 17.81 |
| 2156   | 2016 | 0.63  | 0.01 | 0.096004 | 9.22E-03   | 23.13946 | 0.03854  | 31.25 |
| 2349   | 2016 | -0.35 | 0.01 | 0.096004 | 9.22E-03   | 21.65168 | 0.075331 | 34.09 |
| 2156   | 2016 | 0.624 | 0.01 | 0.096004 | 9.22E-03   | 22.65131 | 0.03854  | 31.25 |
| 300421 | 2016 | -0.04 | 0.01 | 0.096004 | 9.22E-03   | 20.96252 | 0.050512 | 27.6  |
| 2576   | 2016 | -0.26 | 0.01 | 0.096004 | 9.22E-03   | 20.70511 | -0.00656 | 24.01 |
| 600522 | 2016 | -0.52 | 0.01 | 0.096004 | 9.22E-03   | 23.74137 | 0.131933 | 29.42 |
| 2438   | 2016 | 0.081 | 0.01 | 0.096004 | 9.22E-03   | 21.31918 | 0.042334 | 20.46 |
| 2074   | 2016 | 0.764 | 0.01 | 0.096004 | 9.22E-03   | 23.0471  | 0.260821 | 24.79 |
| 601222 | 2016 | 0.134 | 0.01 | 0.096004 | 9.22E-03   | 23.26113 | 0.060454 | 40.63 |
| 2239   | 2016 | -0.87 | 0.01 | 0.096004 | 9.22E-03   | 22.84403 | 0.092013 | 16.07 |
| 2293   | 2016 | 0.468 | 0.01 | 0.096004 | 9.22E-03   | 22.16032 | 0.117633 | 17.81 |
| 2201   | 2016 | -0    | 0.01 | 0.096004 | 9.22E-03   | 21.60789 | 0.004442 | 46.85 |
| 2239   | 2016 | -0.75 | 0.01 | 0.096004 | 9.22E-03   | 22.84403 | 0.092013 | 16.07 |
| 600522 | 2016 | -0.16 | 0.01 | 0.096004 | 9.22E-03   | 23.74137 | 0.131933 | 29.42 |
| 601222 | 2016 | 0.308 | 0.01 | 0.096004 | 9.22E-03   | 23.26113 | 0.060454 | 40.63 |
| 2293   | 2016 | 0.291 | 0.01 | 0.096004 | 9.22E-03   | 22.16032 | 0.117633 | 17.81 |
| 2239   | 2016 | -0.72 | 0.01 | 0.096004 | 9.22E-03   | 22.84403 | 0.092013 | 16.07 |

|        |      |       |      |          |            |          |          |       |
|--------|------|-------|------|----------|------------|----------|----------|-------|
| 2293   | 2016 | -0.06 | 0.01 | 0.096004 | 9.22E-03   | 22.16032 | 0.117633 | 17.81 |
| 2293   | 2016 | 0.291 | 0.01 | 0.096004 | 9.22E-03   | 21.9772  | 0.117633 | 17.81 |
| 2156   | 2016 | -0.27 | 0.01 | 0.096004 | 9.22E-03   | 23.13946 | 0.03854  | 31.25 |
| 601222 | 2016 | -0.17 | 0.01 | 0.096004 | 9.22E-03   | 23.26113 | 0.060454 | 40.63 |
| 2483   | 2016 | -0.04 | 0.01 | 0.096004 | 9.22E-03   | 22.26286 | 0.049687 | 43.47 |
| 2074   | 2016 | 0.862 | 0.01 | 0.096004 | 9.22E-03   | 23.0471  | 0.260821 | 24.79 |
| 2483   | 2016 | -0.03 | 0.01 | 0.096004 | 9.22E-03   | 22.26286 | 0.049687 | 43.47 |
| 2156   | 2016 | 0.63  | 0.01 | 0.096004 | 9.22E-03   | 23.13946 | 0.03854  | 31.25 |
| 600522 | 2016 | -0.11 | 0.01 | 0.096004 | 9.22E-03   | 23.74137 | 0.131933 | 29.42 |
| 2576   | 2016 | 0.18  | 0.01 | 0.096004 | 9.22E-03   | 20.70511 | -0.00656 | 24.01 |
| 2349   | 2016 | -0.35 | 0.01 | 0.096004 | 9.22E-03   | 21.65168 | 0.075331 | 34.09 |
| 2349   | 2016 | 0.283 | 0.01 | 0.096004 | 9.22E-03   | 21.65168 | 0.075331 | 34.09 |
| 2722   | 2016 | -0.28 | 0.01 | 0.096004 | 9.22E-03   | 21.57312 | 0.074995 | 36.05 |
| 2394   | 2016 | 0.556 | 0.01 | 0.096004 | 9.22E-03   | 22.27617 | 0.133085 | 40.45 |
| 2576   | 2016 | 0.18  | 0.01 | 0.096004 | 9.22E-03   | 20.67303 | -0.00656 | 24.01 |
| 601222 | 2016 | -0.58 | 0.01 | 0.096004 | 9.22E-03   | 23.26113 | 0.060454 | 40.63 |
| 600862 | 2016 | -0.24 | 0.01 | 0.096004 | 9.22E-03   | 22.86624 | 0.019803 | 42.86 |
| 300280 | 2016 | -0.4  | 0.01 | 0.096004 | 9.22E-03   | 20.53005 | 0.003521 | 26.17 |
| 2483   | 2016 | -0.09 | 0.01 | 0.096004 | 9.22E-03   | 22.26286 | 0.049687 | 43.47 |
| 2156   | 2016 | -0.36 | 0.01 | 0.096004 | 9.22E-03   | 23.13946 | 0.03854  | 31.25 |
| 2044   | 2016 | 0.332 | 0.01 | 0.096004 | 9.22E-03   | 22.51329 | 0.080085 | 11.22 |
| 2483   | 2016 | -0.03 | 0.01 | 0.096004 | 9.22E-03   | 22.26286 | 0.049687 | 43.47 |
| 300265 | 2016 | -0.57 | 0.01 | 0.096004 | 9.22E-03   | 20.69861 | 0.131135 | 55.19 |
| 2394   | 2016 | 0.081 | 0.01 | 0.096004 | 9.22E-03   | 22.27617 | 0.133085 | 40.45 |
| 600770 | 2016 | 0.99  | 0.01 | 0.096004 | 9.22E-03   | 22.56853 | 0.021031 | 24.72 |
| 600522 | 2016 | -0.31 | 0.01 | 0.096004 | 9.22E-03   | 23.74137 | 0.131933 | 29.42 |
| 2074   | 2016 | 0.253 | 0.01 | 0.096004 | 9.22E-03   | 23.0471  | 0.260821 | 24.79 |
| 2074   | 2016 | 0.862 | 0.01 | 0.096004 | 0.00921669 | 23.0471  | 0.260821 | 24.79 |
| 601222 | 2016 | -0.03 | 0.01 | 0.096004 | 0.00921669 | 23.26113 | 0.060454 | 40.63 |
| 2074   | 2016 | -0.08 | 0.01 | 0.096004 | 0.00921669 | 23.0471  | 0.260821 | 24.79 |
| 300265 | 2016 | -0.13 | 0.01 | 0.096004 | 0.00921669 | 21.43014 | 0.131135 | 55.19 |
| 2201   | 2016 | -0    | 0.01 | 0.096004 | 0.00921669 | 21.60789 | 0.004442 | 46.85 |
| 300091 | 2016 | -0.36 | 0.01 | 0.096004 | 0.00921669 | 21.57591 | 0.043402 | 18.42 |
| 600770 | 2016 | -0.33 | 0.01 | 0.096004 | 0.00921669 | 22.56853 | 0.021031 | 24.72 |
| 2438   | 2016 | -0.27 | 0.01 | 0.096004 | 0.00921669 | 21.3899  | 0.042334 | 20.46 |
| 2074   | 2016 | 0.09  | 0.01 | 0.096004 | 0.00921669 | 23.0471  | 0.260821 | 24.79 |
| 600522 | 2016 | 0.006 | 0.01 | 0.096004 | 0.00921669 | 23.74137 | 0.131933 | 29.42 |
| 600389 | 2016 | 0.436 | 0.01 | 0.096004 | 0.00921669 | 21.90337 | 0.038104 | 29.19 |
| 600522 | 2016 | -0.3  | 0.01 | 0.096004 | 0.00921669 | 23.38316 | 0.131933 | 29.42 |
| 600522 | 2016 | -0.14 | 0.01 | 0.096004 | 0.00921669 | 23.74137 | 0.131933 | 29.42 |
| 35     | 2016 | -0.43 | 0.01 | 0.096004 | 0.00921669 | 22.51477 | 0.102656 | 32.29 |
| 2074   | 2016 | 0.862 | 0.01 | 0.096004 | 0.00921669 | 23.0471  | 0.260821 | 24.79 |
| 2438   | 2016 | 0.315 | 0.01 | 0.096004 | 0.00921669 | 21.3899  | 0.042334 | 20.46 |
| 300265 | 2016 | -0.18 | 0.01 | 0.096004 | 0.00921669 | 21.43014 | 0.131135 | 55.19 |
| 300091 | 2016 | -0.23 | 0.01 | 0.096004 | 0.00921669 | 21.65688 | 0.043402 | 18.42 |
| 600522 | 2016 | 0.008 | 0.01 | 0.096004 | 0.00921669 | 23.74137 | 0.131933 | 29.42 |
| 600522 | 2016 | -0.32 | 0.01 | 0.096004 | 0.00921669 | 23.74137 | 0.131933 | 29.42 |
| 2239   | 2016 | -0.87 | 0.01 | 0.096004 | 0.00921669 | 22.84403 | 0.092013 | 16.07 |
| 2349   | 2016 | 0.311 | 0.01 | 0.096004 | 0.00921669 | 21.65168 | 0.075331 | 34.09 |
| 600522 | 2016 | -0.03 | 0.01 | 0.096004 | 0.00921669 | 23.74137 | 0.131933 | 29.42 |
| 2484   | 2016 | -0.42 | 0.01 | 0.096004 | 0.00921669 | 21.96971 | 0.051632 | 31.84 |
| 600522 | 2016 | 0.008 | 0.01 | 0.096004 | 0.00921669 | 23.74137 | 0.131933 | 29.42 |
| 2722   | 2016 | -0.48 | 0.01 | 0.096004 | 0.00921669 | 21.57312 | 0.074995 | 36.05 |
| 603968 | 2016 | 0.722 | 0.01 | 0.096004 | 0.00921669 | 21.27941 | 0.116972 | 9.98  |

|        |      |       |      |          |            |          |          |       |
|--------|------|-------|------|----------|------------|----------|----------|-------|
| 603968 | 2016 | 0.722 | 0.01 | 0.096004 | 0.00921669 | 21.2297  | 0.116972 | 9.98  |
| 600522 | 2016 | 0.088 | 0.01 | 0.096004 | 0.00921669 | 23.74137 | 0.131933 | 29.42 |
| 601222 | 2016 | 0.134 | 0.01 | 0.096004 | 0.00921669 | 23.26113 | 0.060454 | 40.63 |
| 2722   | 2016 | -0.17 | 0.01 | 0.096004 | 0.00921669 | 21.57312 | 0.074995 | 36.05 |
| 2576   | 2016 | -0.12 | 0.01 | 0.096004 | 0.00921669 | 20.70511 | -0.00656 | 24.01 |
| 2576   | 2016 | -0.14 | 0.01 | 0.096004 | 0.00921669 | 20.70511 | -0.00656 | 24.01 |
| 2349   | 2016 | 0.974 | 0.01 | 0.096004 | 0.00921669 | 21.65168 | 0.075331 | 34.09 |
| 2349   | 2016 | 0.974 | 0.01 | 0.096004 | 0.00921669 | 21.45131 | 0.075331 | 34.09 |
| 2239   | 2016 | -0.74 | 0.01 | 0.096004 | 0.00921669 | 22.19742 | 0.092013 | 16.07 |
| 2576   | 2016 | 0.18  | 0.01 | 0.096004 | 0.00921669 | 20.70511 | -0.00656 | 24.01 |
| 2722   | 2016 | 0.057 | 0.01 | 0.096004 | 0.00921669 | 21.20273 | 0.074995 | 36.05 |
| 35     | 2016 | -0.43 | 0.01 | 0.096004 | 0.00921669 | 22.51477 | 0.102656 | 32.29 |
| 600770 | 2016 | 0.467 | 0.01 | 0.096004 | 0.00921669 | 22.56853 | 0.021031 | 24.72 |
| 600389 | 2016 | 0.18  | 0.01 | 0.096004 | 0.00921669 | 21.90337 | 0.038104 | 29.19 |
| 2293   | 2016 | 0.27  | 0.01 | 0.096004 | 0.00921669 | 22.16032 | 0.117633 | 17.81 |
| 2074   | 2016 | 0.862 | 0.01 | 0.096004 | 0.00921669 | 22.34749 | 0.260821 | 24.79 |
| 300265 | 2016 | -0.57 | 0.01 | 0.096004 | 0.00921669 | 21.43014 | 0.131135 | 55.19 |
| 600522 | 2016 | -0.25 | 0.01 | 0.096004 | 0.00921669 | 23.74137 | 0.131933 | 29.42 |
| 600389 | 2016 | -0.4  | 0.01 | 0.096004 | 0.00921669 | 21.90337 | 0.038104 | 29.19 |
| 300280 | 2016 | -0.4  | 0.01 | 0.096004 | 0.00921669 | 20.53005 | 0.003521 | 26.17 |
| 600862 | 2016 | 0.687 | 0.01 | 0.096004 | 0.00921669 | 22.86624 | 0.019803 | 42.86 |
| 600862 | 2016 | 0.687 | 0.01 | 0.096004 | 0.00921669 | 22.86624 | 0.019803 | 42.86 |
| 2074   | 2016 | 0.226 | 0.01 | 0.096004 | 0.00921669 | 23.0471  | 0.260821 | 24.79 |
| 300091 | 2016 | -0.23 | 0.01 | 0.096004 | 0.00921669 | 21.65688 | 0.043402 | 18.42 |
| 2536   | 2016 | 0.064 | 0.03 | 0.229732 | 0.05277688 | 21.77698 | 0.058753 | 33.36 |
| 2536   | 2016 | -0.06 | 0.03 | 0.229732 | 0.05277688 | 21.77698 | 0.058753 | 33.36 |
| 2536   | 2016 | 0.46  | 0.03 | 0.229732 | 0.05277688 | 21.77698 | 0.058753 | 33.36 |
| 2536   | 2016 | 0.424 | 0.03 | 0.229732 | 0.05277688 | 21.77698 | 0.058753 | 33.36 |
| 2087   | 2016 | -0.51 | 0.03 | 0.229732 | 0.05277688 | 22.79448 | 0.070302 | 27.3  |
| 2536   | 2016 | 0.044 | 0.03 | 0.229732 | 0.05277688 | 21.77698 | 0.058753 | 33.36 |
| 2714   | 2016 | -0.43 | 0.03 | 0.229732 | 0.05277688 | 23.28292 | 0.302158 | 47.6  |
| 2536   | 2016 | 0.592 | 0.03 | 0.229732 | 0.05277688 | 21.64786 | 0.058753 | 33.36 |
| 2536   | 2016 | 0.424 | 0.03 | 0.229732 | 0.05277688 | 21.77698 | 0.058753 | 33.36 |
| 2087   | 2016 | -0.51 | 0.03 | 0.229732 | 0.05277688 | 22.70974 | 0.070302 | 27.3  |
| 2536   | 2016 | 0.064 | 0.03 | 0.229732 | 0.05277688 | 21.77698 | 0.058753 | 33.36 |
| 2087   | 2016 | -0.51 | 0.03 | 0.229732 | 0.05277688 | 22.79448 | 0.070302 | 27.3  |
| 2189   | 2016 | -0.24 | 0.03 | 0.229732 | 0.05277688 | 20.52903 | 0.024944 | 38.99 |
| 2714   | 2016 | -0.43 | 0.03 | 0.229732 | 0.05277688 | 22.99063 | 0.302158 | 47.6  |
| 2189   | 2016 | -0.24 | 0.03 | 0.229732 | 0.05277688 | 20.57761 | 0.024944 | 38.99 |
| 2189   | 2016 | -0.24 | 0.03 | 0.229732 | 0.05277688 | 20.57761 | 0.024944 | 38.99 |
| 2189   | 2016 | -0.24 | 0.03 | 0.229732 | 0.05277688 | 20.57761 | 0.024944 | 38.99 |
| 2189   | 2016 | -0.24 | 0.03 | 0.229732 | 0.05277688 | 20.57761 | 0.024944 | 38.99 |
| 2714   | 2016 | -0.43 | 0.03 | 0.229732 | 0.05277688 | 23.28292 | 0.302158 | 47.6  |
| 2536   | 2016 | 0.525 | 0.03 | 0.229732 | 0.05277688 | 21.77698 | 0.058753 | 33.36 |
| 701    | 2016 | -0.65 | 0.04 | 0.067875 | 0.00460708 | 23.49541 | 0.023329 | 16.66 |
| 2729   | 2016 | -0.53 | 0.04 | 0.067875 | 0.00460708 | 20.10336 | 0.052996 | 47.24 |
| 300096 | 2016 | 2.07  | 0.04 | 0.067875 | 0.00460708 | 21.07321 | 0.013298 | 13.35 |
| 300096 | 2016 | 2.07  | 0.04 | 0.067875 | 0.00460708 | 21.07321 | 0.013298 | 13.35 |
| 2626   | 2016 | 0.57  | 0.04 | 0.067875 | 0.00460708 | 21.85495 | 0.137647 | 35.34 |
| 300102 | 2016 | 0.023 | 0.04 | 0.067875 | 0.00460708 | 21.91638 | 0.01935  | 15.28 |
| 2228   | 2016 | -0.8  | 0.04 | 0.067875 | 0.00460708 | 22.41503 | 0.215625 | 38.08 |
| 600686 | 2016 | -0.67 | 0.04 | 0.067875 | 0.00460708 | 23.94971 | -0.42598 | 29.12 |
| 2593   | 2016 | -0.36 | 0.04 | 0.067875 | 0.00460708 | 21.64109 | 0.037736 | 41.15 |
| 300341 | 2016 | 0.828 | 0.04 | 0.067875 | 0.00460708 | 20.58316 | 0.114522 | 40.91 |



|        |      |       |      |          |            |          |          |       |
|--------|------|-------|------|----------|------------|----------|----------|-------|
| 600549 | 2016 | 0.194 | 0.04 | 0.067875 | 0.00460708 | 23.46408 | 0.036847 | 32.05 |
| 300102 | 2016 | -0.04 | 0.04 | 0.067875 | 0.00460708 | 21.91638 | 0.01935  | 15.28 |
| 600549 | 2016 | 0.57  | 0.04 | 0.067875 | 0.00460708 | 23.46408 | 0.036847 | 32.05 |
| 2729   | 2016 | -0.53 | 0.04 | 0.067875 | 0.00460708 | 20.10336 | 0.052996 | 47.24 |
| 2593   | 2016 | -0.36 | 0.04 | 0.067875 | 0.00460708 | 21.97443 | 0.037736 | 41.15 |
| 2335   | 2016 | 0.208 | 0.04 | 0.067875 | 0.00460708 | 22.34515 | 0.055322 | 31.78 |
| 600815 | 2016 | -0.32 | 0.04 | 0.067875 | 0.00460708 | 22.75967 | -0.4336  | 40.98 |
| 2228   | 2016 | -0.8  | 0.04 | 0.067875 | 0.00460708 | 22.41503 | 0.215625 | 38.08 |
| 2593   | 2016 | -0.58 | 0.04 | 0.067875 | 0.00460708 | 21.97443 | 0.037736 | 41.15 |
| 2398   | 2016 | -0.44 | 0.04 | 0.067875 | 0.00460708 | 21.70048 | 0.078195 | 17.76 |
| 300341 | 2016 | -0.23 | 0.04 | 0.067875 | 0.00460708 | 20.84932 | 0.114522 | 40.91 |
| 300427 | 2016 | 0.333 | 0.04 | 0.067875 | 0.00460708 | 20.61135 | 0.122775 | 44.02 |
| 2593   | 2016 | -0.45 | 0.04 | 0.067875 | 0.00460708 | 21.97443 | 0.037736 | 41.15 |
| 600549 | 2016 | 0.022 | 0.04 | 0.067875 | 0.00460708 | 23.46408 | 0.036847 | 32.05 |
| 600549 | 2016 | 0.684 | 0.04 | 0.067875 | 0.00460708 | 23.46408 | 0.036847 | 32.05 |
| 2614   | 2016 | 0.053 | 0.04 | 0.067875 | 0.00460708 | 22.20442 | 0.10386  | 27.82 |
| 2626   | 2016 | 0.685 | 0.04 | 0.067875 | 0.00460708 | 21.53855 | 0.137647 | 35.34 |
| 2614   | 2016 | -0.56 | 0.04 | 0.067875 | 0.00460708 | 22.20442 | 0.10386  | 27.82 |
| 701    | 2016 | -0.88 | 0.04 | 0.067875 | 0.00460708 | 23.49541 | 0.023329 | 16.66 |
| 2626   | 2016 | 0.352 | 0.04 | 0.067875 | 0.00460708 | 21.85495 | 0.137647 | 35.34 |
| 600549 | 2016 | 0.12  | 0.04 | 0.067875 | 0.00460708 | 23.46408 | 0.036847 | 32.05 |
| 2398   | 2016 | 0.368 | 0.04 | 0.067875 | 0.00460708 | 21.70048 | 0.078195 | 17.76 |
| 2228   | 2016 | -0.88 | 0.04 | 0.067875 | 0.00460708 | 22.41503 | 0.215625 | 38.08 |
| 300096 | 2016 | 1.911 | 0.04 | 0.067875 | 0.00460708 | 20.84186 | 0.013298 | 13.35 |
| 2614   | 2016 | -0.52 | 0.04 | 0.067875 | 0.00460708 | 22.20442 | 0.10386  | 27.82 |
| 300056 | 2016 | 0.265 | 0.04 | 0.067875 | 0.00460708 | 21.74765 | -0.04091 | 17.35 |
| 600815 | 2016 | -0.64 | 0.04 | 0.067875 | 0.00460708 | 22.75967 | -0.4336  | 40.98 |
| 600549 | 2016 | -0.12 | 0.04 | 0.067875 | 0.00460708 | 23.11189 | 0.036847 | 32.05 |
| 300188 | 2016 | 2.221 | 0.04 | 0.067875 | 0.00460708 | 21.68901 | 0.094442 | 23.15 |
| 2228   | 2016 | -0.88 | 0.04 | 0.067875 | 0.00460708 | 22.41503 | 0.215625 | 38.08 |
| 300056 | 2016 | -0    | 0.04 | 0.067875 | 0.00460708 | 21.74765 | -0.04091 | 17.35 |
| 2614   | 2016 | -0.51 | 0.04 | 0.067875 | 0.00460708 | 22.20442 | 0.10386  | 27.82 |
| 2626   | 2016 | 0.622 | 0.04 | 0.067875 | 0.00460708 | 21.85495 | 0.137647 | 35.34 |
| 600549 | 2016 | 0.022 | 0.04 | 0.067875 | 0.00460708 | 23.46408 | 0.036847 | 32.05 |
| 600549 | 2016 | 0.341 | 0.04 | 0.067875 | 0.00460708 | 23.46408 | 0.036847 | 32.05 |
| 2228   | 2016 | -0.8  | 0.04 | 0.067875 | 0.00460708 | 22.41503 | 0.215625 | 38.08 |
| 2626   | 2016 | 0.622 | 0.04 | 0.067875 | 0.00460708 | 21.85495 | 0.137647 | 35.34 |
| 2335   | 2016 | 0.045 | 0.04 | 0.067875 | 0.00460708 | 22.34515 | 0.055322 | 31.78 |
| 600549 | 2016 | -0.48 | 0.04 | 0.067875 | 0.00460708 | 23.46408 | 0.036847 | 32.05 |
| 2335   | 2016 | 0.629 | 0.04 | 0.067875 | 0.00460708 | 22.34515 | 0.055322 | 31.78 |
| 300427 | 2016 | 0.476 | 0.04 | 0.067875 | 0.00460708 | 20.61135 | 0.122775 | 44.02 |
| 2398   | 2016 | 0.257 | 0.04 | 0.067875 | 0.00460708 | 21.70048 | 0.078195 | 17.76 |
| 600686 | 2016 | -0.67 | 0.04 | 0.067875 | 0.00460708 | 23.94971 | -0.42598 | 29.12 |
| 2626   | 2016 | 0.177 | 0.04 | 0.067875 | 0.00460708 | 21.85495 | 0.137647 | 35.34 |
| 2398   | 2016 | -0.63 | 0.04 | 0.067875 | 0.00460708 | 21.70048 | 0.078195 | 17.76 |
| 2593   | 2016 | -0.58 | 0.04 | 0.067875 | 0.00460708 | 21.97443 | 0.037736 | 41.15 |
| 300056 | 2016 | -0.4  | 0.04 | 0.067875 | 0.00460708 | 21.74765 | -0.04091 | 17.35 |
| 2614   | 2016 | -0.61 | 0.04 | 0.067875 | 0.00460708 | 22.20442 | 0.10386  | 27.82 |
| 300188 | 2016 | 2.011 | 0.04 | 0.067875 | 0.00460708 | 21.68901 | 0.094442 | 23.15 |
| 600686 | 2016 | -0.59 | 0.04 | 0.067875 | 0.00460708 | 23.94971 | -0.42598 | 29.12 |
| 603306 | 2016 | -0.62 | 0.04 | 0.067875 | 0.00460708 | 21.17544 | 0.201931 | 59.27 |
| 600549 | 2016 | -0.64 | 0.04 | 0.067875 | 0.00460708 | 23.46408 | 0.036847 | 32.05 |
| 300188 | 2016 | 1.813 | 0.04 | 0.067875 | 0.00460708 | 21.68901 | 0.094442 | 23.15 |
| 600549 | 2016 | 0.684 | 0.04 | 0.067875 | 0.00460708 | 23.46408 | 0.036847 | 32.05 |

|        |      |       |      |          |            |          |          |       |
|--------|------|-------|------|----------|------------|----------|----------|-------|
| 2593   | 2016 | -0.36 | 0.04 | 0.067875 | 0.00460708 | 21.97443 | 0.037736 | 41.15 |
| 2593   | 2016 | -0.36 | 0.04 | 0.067875 | 0.00460708 | 21.97443 | 0.037736 | 41.15 |
| 2729   | 2016 | -0.53 | 0.04 | 0.067875 | 0.00460708 | 20.10336 | 0.052996 | 47.24 |
| 300341 | 2016 | 0.828 | 0.04 | 0.067875 | 0.00460708 | 20.84932 | 0.114522 | 40.91 |
| 701    | 2016 | -0.91 | 0.04 | 0.067875 | 0.00460708 | 23.49541 | 0.023329 | 16.66 |
| 2593   | 2016 | -0.36 | 0.04 | 0.067875 | 0.00460708 | 21.97443 | 0.037736 | 41.15 |
| 701    | 2016 | -0.88 | 0.04 | 0.067875 | 0.00460708 | 23.49541 | 0.023329 | 16.66 |
| 300056 | 2016 | -0.3  | 0.04 | 0.067875 | 0.00460708 | 21.74765 | -0.04091 | 17.35 |
| 2614   | 2016 | -0.54 | 0.04 | 0.067875 | 0.00460708 | 22.20442 | 0.10386  | 27.82 |
| 701    | 2016 | -0.91 | 0.04 | 0.067875 | 0.00460708 | 23.49541 | 0.023329 | 16.66 |
| 600549 | 2016 | -0.18 | 0.04 | 0.067875 | 0.00460708 | 23.46408 | 0.036847 | 32.05 |
| 600686 | 2016 | -0.67 | 0.04 | 0.067875 | 0.00460708 | 23.94971 | -0.42598 | 29.12 |
| 300188 | 2016 | 2.221 | 0.04 | 0.067875 | 0.00460708 | 21.66668 | 0.094442 | 23.15 |
| 600549 | 2016 | -0.06 | 0.04 | 0.067875 | 0.00460708 | 23.46408 | 0.036847 | 32.05 |
| 2626   | 2016 | 0.685 | 0.04 | 0.067875 | 0.00460708 | 21.85495 | 0.137647 | 35.34 |
| 2614   | 2016 | -0.61 | 0.04 | 0.067875 | 0.00460708 | 22.20442 | 0.10386  | 27.82 |
| 600815 | 2016 | -0.52 | 0.04 | 0.067875 | 0.00460708 | 22.75967 | -0.4336  | 40.98 |
| 2593   | 2016 | -0.36 | 0.04 | 0.067875 | 0.00460708 | 21.97443 | 0.037736 | 41.15 |
| 2335   | 2016 | 0.045 | 0.04 | 0.067875 | 0.00460708 | 22.34515 | 0.055322 | 31.78 |
| 2335   | 2016 | 0.208 | 0.04 | 0.067875 | 0.00460708 | 22.34515 | 0.055322 | 31.78 |
| 600686 | 2016 | -0.67 | 0.04 | 0.067875 | 0.00460708 | 23.94971 | -0.42598 | 29.12 |
| 300188 | 2016 | 0.896 | 0.04 | 0.067875 | 0.00460708 | 21.68901 | 0.094442 | 23.15 |
| 701    | 2016 | -0.88 | 0.04 | 0.067875 | 0.00460708 | 23.33376 | 0.023329 | 16.66 |
| 600815 | 2016 | -0.6  | 0.04 | 0.067875 | 0.00460708 | 22.75967 | -0.4336  | 40.98 |
| 2593   | 2016 | -0.36 | 0.04 | 0.067875 | 0.00460708 | 21.97443 | 0.037736 | 41.15 |
| 600815 | 2016 | -0.64 | 0.04 | 0.067875 | 0.00460708 | 22.75967 | -0.4336  | 40.98 |
| 600686 | 2016 | 0.099 | 0.04 | 0.067875 | 0.00460708 | 23.94971 | -0.42598 | 29.12 |
| 300341 | 2016 | 0.563 | 0.04 | 0.067875 | 0.00460708 | 20.84932 | 0.114522 | 40.91 |
| 2398   | 2016 | 0.028 | 0.04 | 0.067875 | 0.00460708 | 21.70048 | 0.078195 | 17.76 |
| 300102 | 2016 | 0.22  | 0.04 | 0.067875 | 4.61E-03   | 21.91638 | 0.01935  | 15.28 |
| 300102 | 2016 | -0.6  | 0.04 | 0.067875 | 4.61E-03   | 21.91638 | 0.01935  | 15.28 |
| 300096 | 2016 | 1.275 | 0.04 | 0.067875 | 4.61E-03   | 21.07321 | 0.013298 | 13.35 |
| 2614   | 2016 | -0.46 | 0.04 | 0.067875 | 4.61E-03   | 22.20442 | 0.10386  | 27.82 |
| 2228   | 2016 | -0.8  | 0.04 | 0.067875 | 4.61E-03   | 22.41503 | 0.215625 | 38.08 |
| 603306 | 2016 | -0.62 | 0.04 | 0.067875 | 4.61E-03   | 21.17544 | 0.201931 | 59.27 |
| 2398   | 2016 | 0.241 | 0.04 | 0.067875 | 4.61E-03   | 21.70048 | 0.078195 | 17.76 |
| 300341 | 2016 | 0.563 | 0.04 | 0.067875 | 0.00460708 | 20.84932 | 0.114522 | 40.91 |
| 600549 | 2016 | 0.022 | 0.04 | 0.067875 | 0.00460708 | 23.46408 | 0.036847 | 32.05 |
| 2614   | 2016 | -0.42 | 0.04 | 0.067875 | 0.00460708 | 22.20442 | 0.10386  | 27.82 |
| 600815 | 2016 | -0.61 | 0.04 | 0.067875 | 0.00460708 | 22.75967 | -0.4336  | 40.98 |
| 300102 | 2016 | 0.22  | 0.04 | 0.067875 | 0.00460708 | 21.78243 | 0.01935  | 15.28 |
| 2335   | 2016 | 0.095 | 0.04 | 0.067875 | 0.00460708 | 22.34515 | 0.055322 | 31.78 |
| 2614   | 2016 | -0.42 | 0.04 | 0.067875 | 0.00460708 | 21.97271 | 0.10386  | 27.82 |
| 2335   | 2016 | 0.151 | 0.04 | 0.067875 | 0.00460708 | 22.18877 | 0.055322 | 31.78 |
| 701    | 2016 | -0.88 | 0.04 | 0.067875 | 0.00460708 | 23.49541 | 0.023329 | 16.66 |
| 300056 | 2016 | -0.4  | 0.04 | 0.067875 | 0.00460708 | 21.74765 | -0.04091 | 17.35 |
| 300188 | 2016 | 1.963 | 0.04 | 0.067875 | 0.00460708 | 21.68901 | 0.094442 | 23.15 |
| 701    | 2016 | -0.91 | 0.04 | 0.067875 | 0.00460708 | 23.49541 | 0.023329 | 16.66 |
| 600815 | 2016 | -0.64 | 0.04 | 0.067875 | 0.00460708 | 22.75967 | -0.4336  | 40.98 |
| 2335   | 2016 | 0.208 | 0.04 | 0.067875 | 0.00460708 | 22.34515 | 0.055322 | 31.78 |
| 300102 | 2016 | 0.098 | 0.04 | 0.067875 | 0.00460708 | 21.91638 | 0.01935  | 15.28 |
| 2398   | 2016 | -0.11 | 0.04 | 0.067875 | 4.61E-03   | 21.70048 | 0.078195 | 17.76 |
| 300341 | 2016 | 0.06  | 0.04 | 0.067875 | 4.61E-03   | 20.84932 | 0.114522 | 40.91 |
| 2228   | 2016 | -0.88 | 0.04 | 0.067875 | 4.61E-03   | 21.8767  | 0.215625 | 38.08 |

|        |      |       |      |          |            |          |          |       |
|--------|------|-------|------|----------|------------|----------|----------|-------|
| 300188 | 2016 | 2.221 | 0.04 | 0.067875 | 4.61E-03   | 21.68901 | 0.094442 | 23.15 |
| 600686 | 2016 | 0.658 | 0.04 | 0.067875 | 4.61E-03   | 23.94971 | -0.42598 | 29.12 |
| 600686 | 2016 | -0.26 | 0.04 | 0.067875 | 4.61E-03   | 22.03003 | -0.42598 | 29.12 |
| 300341 | 2016 | 0.163 | 0.04 | 0.067875 | 4.61E-03   | 20.84932 | 0.114522 | 40.91 |
| 600815 | 2016 | -0.64 | 0.04 | 0.067875 | 0.00460708 | 22.75967 | -0.4336  | 40.98 |
| 2398   | 2016 | -0.12 | 0.04 | 0.067875 | 0.00460708 | 21.70048 | 0.078195 | 17.76 |
| 600815 | 2016 | -0.64 | 0.04 | 0.067875 | 0.00460708 | 22.60277 | -0.4336  | 40.98 |
| 2228   | 2016 | -0.8  | 0.04 | 0.067875 | 0.00460708 | 22.41503 | 0.215625 | 38.08 |
| 600815 | 2016 | -0.64 | 0.04 | 0.067875 | 0.00460708 | 22.75967 | -0.4336  | 40.98 |
| 600815 | 2016 | -0.61 | 0.04 | 0.067875 | 0.00460708 | 22.75967 | -0.4336  | 40.98 |
| 600549 | 2016 | 0.022 | 0.04 | 0.067875 | 0.00460708 | 23.46408 | 0.036847 | 32.05 |
| 600549 | 2016 | 0.57  | 0.04 | 0.067875 | 0.00460708 | 23.46408 | 0.036847 | 32.05 |
| 600815 | 2016 | -0.64 | 0.04 | 0.067875 | 0.00460708 | 22.75967 | -0.4336  | 40.98 |
| 2335   | 2016 | -0.12 | 0.04 | 0.067875 | 0.00460708 | 22.34515 | 0.055322 | 31.78 |
| 300056 | 2016 | 0.265 | 0.04 | 0.067875 | 0.00460708 | 21.74765 | -0.04091 | 17.35 |
| 2729   | 2016 | -0.53 | 0.04 | 0.067875 | 0.00460708 | 20.10336 | 0.052996 | 47.24 |
| 2228   | 2016 | -0.84 | 0.04 | 0.067875 | 0.00460708 | 22.41503 | 0.215625 | 38.08 |
| 300056 | 2016 | -0.4  | 0.04 | 0.067875 | 0.00460708 | 21.74765 | -0.04091 | 17.35 |
| 300102 | 2016 | -0.6  | 0.04 | 0.067875 | 0.00460708 | 21.91638 | 0.01935  | 15.28 |
| 300427 | 2016 | 0.476 | 0.04 | 0.067875 | 0.00460708 | 20.61135 | 0.122775 | 44.02 |
| 2335   | 2016 | 0.419 | 0.04 | 0.067875 | 0.00460708 | 22.34515 | 0.055322 | 31.78 |
| 2398   | 2016 | 0.368 | 0.04 | 0.067875 | 0.00460708 | 21.70048 | 0.078195 | 17.76 |
| 600686 | 2016 | -0.67 | 0.04 | 0.067875 | 0.00460708 | 23.94971 | -0.42598 | 29.12 |
| 2335   | 2016 | 0.762 | 0.04 | 0.067875 | 0.00460708 | 22.34515 | 0.055322 | 31.78 |
| 300341 | 2016 | 0.013 | 0.04 | 0.067875 | 0.00460708 | 20.84932 | 0.114522 | 40.91 |
| 2398   | 2016 | -0.12 | 0.04 | 0.067875 | 0.00460708 | 21.70048 | 0.078195 | 17.76 |
| 300056 | 2016 | 0.044 | 0.04 | 0.067875 | 0.00460708 | 21.49362 | -0.04091 | 17.35 |
| 300188 | 2016 | 1.559 | 0.04 | 0.067875 | 0.00460708 | 21.68901 | 0.094442 | 23.15 |
| 300427 | 2016 | 0.333 | 0.04 | 0.067875 | 0.00460708 | 20.61135 | 0.122775 | 44.02 |
| 2228   | 2016 | -0.8  | 0.04 | 0.067875 | 0.00460708 | 22.41503 | 0.215625 | 38.08 |
| 2626   | 2016 | -0.64 | 0.04 | 0.067875 | 0.00460708 | 21.85495 | 0.137647 | 35.34 |
| 2614   | 2016 | -0.3  | 0.04 | 0.067875 | 0.00460708 | 22.20442 | 0.10386  | 27.82 |
| 300096 | 2016 | 1.275 | 0.04 | 0.067875 | 0.00460708 | 21.07321 | 0.013298 | 13.35 |
| 603306 | 2016 | -0.62 | 0.04 | 0.067875 | 0.00460708 | 21.17544 | 0.201931 | 59.27 |
| 300427 | 2016 | 0.4   | 0.04 | 0.067875 | 0.00460708 | 20.45562 | 0.122775 | 44.02 |
| 300188 | 2016 | 2.011 | 0.04 | 0.067875 | 0.00460708 | 21.68901 | 0.094442 | 23.15 |
| 2398   | 2016 | -0.22 | 0.04 | 0.067875 | 0.00460708 | 21.70048 | 0.078195 | 17.76 |
| 2729   | 2016 | -0.53 | 0.04 | 0.067875 | 0.00460708 | 20.10336 | 0.052996 | 47.24 |
| 2398   | 2016 | 0.169 | 0.04 | 0.067875 | 0.00460708 | 21.70048 | 0.078195 | 17.76 |
| 300096 | 2016 | 2.07  | 0.04 | 0.067875 | 0.00460708 | 21.07321 | 0.013298 | 13.35 |
| 2398   | 2016 | -0.3  | 0.04 | 0.067875 | 0.00460708 | 21.00552 | 0.078195 | 17.76 |
| 2614   | 2016 | -0.48 | 0.04 | 0.067875 | 0.00460708 | 22.20442 | 0.10386  | 27.82 |
| 2593   | 2016 | -0.36 | 0.04 | 0.067875 | 0.00460708 | 21.97443 | 0.037736 | 41.15 |
| 600686 | 2016 | -0.26 | 0.04 | 0.067875 | 0.00460708 | 23.94971 | -0.42598 | 29.12 |
| 2398   | 2016 | -0.44 | 0.04 | 0.067875 | 0.00460708 | 21.70048 | 0.078195 | 17.76 |
| 2398   | 2016 | -0.01 | 0.04 | 0.067875 | 0.00460708 | 21.70048 | 0.078195 | 17.76 |
| 300102 | 2016 | -0.24 | 0.04 | 0.067875 | 0.00460708 | 21.91638 | 0.01935  | 15.28 |
| 600686 | 2016 | -0.67 | 0.04 | 0.067875 | 0.00460708 | 23.94971 | -0.42598 | 29.12 |
| 600686 | 2016 | -0.24 | 0.04 | 0.067875 | 0.00460708 | 23.94971 | -0.42598 | 29.12 |
| 2131   | 2016 | -0.62 | 0.04 | 0.025156 | 0.00063282 | 22.83182 | 0.077826 | 15.05 |
| 2532   | 2016 | -0.56 | 0.04 | 0.025156 | 0.00063282 | 21.55662 | 0.078083 | 20.88 |
| 2372   | 2016 | -0.55 | 0.04 | 0.025156 | 0.00063282 | 22.02378 | 0.244154 | 36.46 |
| 300351 | 2016 | -0.09 | 0.04 | 0.025156 | 0.00063282 | 21.64494 | 0.057906 | 15.71 |
| 913    | 2016 | 0.087 | 0.04 | 0.025156 | 0.00063282 | 22.00234 | 0.129651 | 29.77 |

|        |      |       |      |          |            |          |          |       |
|--------|------|-------|------|----------|------------|----------|----------|-------|
| 300256 | 2016 | -0.05 | 0.04 | 0.025156 | 0.00063282 | 22.78303 | 0.043432 | 13.67 |
| 300256 | 2016 | -0.53 | 0.04 | 0.025156 | 0.00063282 | 22.78303 | 0.043432 | 13.67 |
| 2641   | 2016 | 0.313 | 0.04 | 0.025156 | 0.00063282 | 22.07418 | 0.084559 | 42.05 |
| 2372   | 2016 | -0.63 | 0.04 | 0.025156 | 0.00063282 | 22.02378 | 0.244154 | 36.46 |
| 2332   | 2016 | -0.73 | 0.04 | 0.025156 | 0.00063282 | 22.00994 | 0.06545  | 21.55 |
| 603456 | 2016 | 0.765 | 0.04 | 0.025156 | 0.00063282 | 21.82148 | 0.043391 | 44.43 |
| 600521 | 2016 | 1.117 | 0.04 | 0.025156 | 0.00063282 | 22.6293  | 0.099807 | 26.45 |
| 2326   | 2016 | 0.414 | 0.04 | 0.025156 | 0.00063282 | 22.21956 | 0.128512 | 23.84 |
| 2126   | 2016 | -0.56 | 0.04 | 0.025156 | 0.00063282 | 22.29066 | 0.105559 | 11.16 |
| 300351 | 2016 | -0.11 | 0.04 | 0.025156 | 0.00063282 | 21.85667 | 0.057906 | 15.71 |
| 2332   | 2016 | -0.73 | 0.04 | 0.025156 | 0.00063282 | 21.88542 | 0.06545  | 21.55 |
| 603085 | 2016 | -0.07 | 0.04 | 0.025156 | 0.00063282 | 20.80931 | 0.03818  | 48.25 |
| 2131   | 2016 | -0.77 | 0.04 | 0.025156 | 0.00063282 | 23.14387 | 0.077826 | 15.05 |
| 603456 | 2016 | 0.765 | 0.04 | 0.025156 | 0.00063282 | 21.74294 | 0.043391 | 44.43 |
| 2686   | 2016 | 0.097 | 0.04 | 0.025156 | 0.00063282 | 21.23388 | 0.131729 | 18.56 |
| 2250   | 2016 | 0.795 | 0.04 | 0.025156 | 0.00063282 | 22.5152  | 0.06126  | 30.5  |
| 2003   | 2016 | 0.421 | 0.04 | 0.025156 | 0.00063282 | 21.7071  | 0.138799 | 29.47 |
| 603010 | 2016 | 0.162 | 0.04 | 0.025156 | 0.00063282 | 21.06382 | 0.141749 | 29.35 |
| 2664   | 2016 | -0.41 | 0.04 | 0.025156 | 0.00063282 | 21.68109 | 0.130361 | 25.7  |
| 603456 | 2016 | 0.765 | 0.04 | 0.025156 | 0.00063282 | 21.82148 | 0.043391 | 44.43 |
| 2532   | 2016 | -0.56 | 0.04 | 0.025156 | 0.00063282 | 21.55662 | 0.078083 | 20.88 |
| 2725   | 2016 | -0.61 | 0.04 | 0.025156 | 0.00063282 | 20.76069 | 0.04983  | 13.12 |
| 603222 | 2016 | -0.28 | 0.04 | 0.025156 | 0.00063282 | 20.64252 | 0.048987 | 36.2  |
| 2099   | 2016 | -0.62 | 0.04 | 0.025156 | 0.00063282 | 22.47769 | 0.047075 | 35.49 |
| 913    | 2016 | -0.44 | 0.04 | 0.025156 | 0.00063282 | 22.00234 | 0.129651 | 29.77 |
| 2021   | 2016 | -0.31 | 0.04 | 0.025156 | 0.00063282 | 21.1279  | 0.016522 | 17.45 |
| 2126   | 2016 | 0.417 | 0.04 | 0.025156 | 0.00063282 | 22.29066 | 0.105559 | 11.16 |
| 2332   | 2016 | 0.467 | 0.04 | 0.025156 | 0.00063282 | 22.00994 | 0.06545  | 21.55 |
| 2686   | 2016 | 0.229 | 0.04 | 0.025156 | 0.00063282 | 21.23388 | 0.131729 | 18.56 |
| 603456 | 2016 | 0.765 | 0.04 | 0.025156 | 0.00063282 | 21.82148 | 0.043391 | 44.43 |
| 2472   | 2016 | -0.02 | 0.04 | 0.025156 | 0.00063282 | 22.08555 | 0.061629 | 8.86  |
| 913    | 2016 | -0.38 | 0.04 | 0.025156 | 0.00063282 | 22.00234 | 0.129651 | 29.77 |
| 600267 | 2016 | 0.875 | 0.04 | 0.025156 | 0.00063282 | 23.16    | 0.007694 | 33.22 |
| 2532   | 2016 | -0    | 0.04 | 0.025156 | 0.00063282 | 21.55662 | 0.078083 | 20.88 |
| 2532   | 2016 | -0.56 | 0.04 | 0.025156 | 0.00063282 | 21.55662 | 0.078083 | 20.88 |
| 603010 | 2016 | 0.162 | 0.04 | 0.025156 | 0.00063282 | 21.06382 | 0.141749 | 29.35 |
| 2273   | 2016 | -0.16 | 0.04 | 0.025156 | 0.00063282 | 21.94828 | 0.088076 | 21.27 |
| 2472   | 2016 | -0.02 | 0.04 | 0.025156 | 0.00063282 | 22.08555 | 0.061629 | 8.86  |
| 2003   | 2016 | -0.04 | 0.04 | 0.025156 | 0.00063282 | 21.7071  | 0.138799 | 29.47 |
| 2641   | 2016 | -0.7  | 0.04 | 0.025156 | 0.00063282 | 22.19291 | 0.084559 | 42.05 |
| 600521 | 2016 | 1.082 | 0.04 | 0.025156 | 0.00063282 | 22.6293  | 0.099807 | 26.45 |
| 603996 | 2016 | -0.57 | 0.04 | 0.025156 | 0.00063282 | 21.85493 | 0.084294 | 51.16 |
| 2131   | 2016 | 0.329 | 0.04 | 0.025156 | 0.00063282 | 23.14387 | 0.077826 | 15.05 |
| 603010 | 2016 | 0.162 | 0.04 | 0.025156 | 0.00063282 | 20.86635 | 0.141749 | 29.35 |
| 603222 | 2016 | -0.6  | 0.04 | 0.025156 | 0.00063282 | 20.39044 | 0.048987 | 36.2  |
| 300256 | 2016 | 0.366 | 0.04 | 0.025156 | 0.00063282 | 22.78303 | 0.043432 | 13.67 |
| 603456 | 2016 | 0.765 | 0.04 | 0.025156 | 0.00063282 | 21.82148 | 0.043391 | 44.43 |
| 2099   | 2016 | 0.042 | 0.04 | 0.025156 | 0.00063282 | 22.6556  | 0.047075 | 35.49 |
| 2326   | 2016 | 0.626 | 0.04 | 0.025156 | 0.00063282 | 22.21956 | 0.128512 | 23.84 |
| 2273   | 2016 | -0.16 | 0.04 | 0.025156 | 0.00063282 | 21.94828 | 0.088076 | 21.27 |
| 2032   | 2016 | -0.23 | 0.04 | 0.025156 | 0.00063282 | 22.16546 | 0.24877  | 74.18 |
| 603456 | 2016 | 0.765 | 0.04 | 0.025156 | 0.00063282 | 21.82148 | 0.043391 | 44.43 |
| 2686   | 2016 | 0.229 | 0.04 | 0.025156 | 0.00063282 | 21.23388 | 0.131729 | 18.56 |
| 2250   | 2016 | 0.795 | 0.04 | 0.025156 | 0.00063282 | 22.5152  | 0.06126  | 30.5  |

|        |      |       |      |          |            |          |          |       |
|--------|------|-------|------|----------|------------|----------|----------|-------|
| 300351 | 2016 | -0.33 | 0.04 | 0.025156 | 0.00063282 | 21.85667 | 0.057906 | 15.71 |
| 913    | 2016 | -0.32 | 0.04 | 0.025156 | 0.00063282 | 22.00234 | 0.129651 | 29.77 |
| 2389   | 2016 | 0.123 | 0.04 | 0.025156 | 0.00063282 | 22.1055  | 0.040215 | 21.08 |
| 600267 | 2016 | -0.41 | 0.04 | 0.025156 | 0.00063282 | 23.75621 | 0.007694 | 33.22 |
| 603456 | 2016 | 0.765 | 0.04 | 0.025156 | 0.00063282 | 21.82148 | 0.043391 | 44.43 |
| 2021   | 2016 | -0.31 | 0.04 | 0.025156 | 0.00063282 | 21.28049 | 0.016522 | 17.45 |
| 2126   | 2016 | -0.45 | 0.04 | 0.025156 | 0.00063282 | 22.29066 | 0.105559 | 11.16 |
| 300351 | 2016 | -0.4  | 0.04 | 0.025156 | 0.00063282 | 21.85667 | 0.057906 | 15.71 |
| 603456 | 2016 | 0.765 | 0.04 | 0.025156 | 0.00063282 | 21.82148 | 0.043391 | 44.43 |
| 300351 | 2016 | -0.4  | 0.04 | 0.025156 | 0.00063282 | 21.85667 | 0.057906 | 15.71 |
| 2032   | 2016 | -0.69 | 0.04 | 0.025156 | 0.00063282 | 22.16546 | 0.24877  | 74.18 |
| 2686   | 2016 | -0.12 | 0.04 | 0.025156 | 0.00063282 | 20.81574 | 0.131729 | 18.56 |
| 2099   | 2016 | 0.464 | 0.04 | 0.025156 | 0.00063282 | 22.6556  | 0.047075 | 35.49 |
| 2332   | 2016 | -0.73 | 0.04 | 0.025156 | 0.00063282 | 22.00994 | 0.06545  | 21.55 |
| 2403   | 2016 | -0.71 | 0.04 | 0.025156 | 0.00063282 | 21.96524 | 0.06258  | 35.07 |
| 300351 | 2016 | -0.14 | 0.04 | 0.025156 | 0.00063282 | 21.85667 | 0.057906 | 15.71 |
| 2532   | 2016 | -0.17 | 0.04 | 0.025156 | 0.00063282 | 21.55662 | 0.078083 | 20.88 |
| 2372   | 2016 | -0.63 | 0.04 | 0.025156 | 0.00063282 | 22.02378 | 0.244154 | 36.46 |
| 2641   | 2016 | -0.7  | 0.04 | 0.025156 | 0.00063282 | 22.19291 | 0.084559 | 42.05 |
| 2332   | 2016 | -0.73 | 0.04 | 0.025156 | 0.00063282 | 22.00994 | 0.06545  | 21.55 |
| 2686   | 2016 | 0.229 | 0.04 | 0.025156 | 0.00063282 | 21.23388 | 0.131729 | 18.56 |
| 2641   | 2016 | 0.313 | 0.04 | 0.025156 | 0.00063282 | 22.19291 | 0.084559 | 42.05 |
| 2032   | 2016 | -0.47 | 0.04 | 0.025156 | 0.00063282 | 22.16546 | 0.24877  | 74.18 |
| 2532   | 2016 | -0.63 | 0.04 | 0.025156 | 0.00063282 | 21.55662 | 0.078083 | 20.88 |
| 2250   | 2016 | 0.177 | 0.04 | 0.025156 | 0.00063282 | 22.5152  | 0.06126  | 30.5  |
| 300351 | 2016 | -0.14 | 0.04 | 0.025156 | 0.00063282 | 21.85667 | 0.057906 | 15.71 |
| 2532   | 2016 | -0.5  | 0.04 | 0.025156 | 0.00063282 | 21.36765 | 0.078083 | 20.88 |
| 2641   | 2016 | -0.02 | 0.04 | 0.025156 | 0.00063282 | 22.19291 | 0.084559 | 42.05 |
| 603996 | 2016 | -0.57 | 0.04 | 0.025156 | 0.00063282 | 21.85493 | 0.084294 | 51.16 |
| 2725   | 2016 | -0.61 | 0.04 | 0.025156 | 0.00063282 | 20.76    | 0.04983  | 13.12 |
| 600267 | 2016 | 0.875 | 0.04 | 0.025156 | 0.00063282 | 23.75621 | 0.007694 | 33.22 |
| 2489   | 2016 | -0.77 | 0.04 | 0.025156 | 0.00063282 | 22.59929 | 0.012826 | 37.94 |
| 2472   | 2016 | -0.14 | 0.04 | 0.025156 | 0.00063282 | 21.94504 | 0.061629 | 8.86  |
| 2326   | 2016 | 0.596 | 0.04 | 0.025156 | 0.00063282 | 22.21956 | 0.128512 | 23.84 |
| 2326   | 2016 | 0.855 | 0.04 | 0.025156 | 0.00063282 | 22.21956 | 0.128512 | 23.84 |
| 2099   | 2016 | 0.018 | 0.04 | 0.025156 | 0.00063282 | 22.6556  | 0.047075 | 35.49 |
| 2389   | 2016 | -0.64 | 0.04 | 0.025156 | 0.00063282 | 22.1055  | 0.040215 | 21.08 |
| 2332   | 2016 | -0.73 | 0.04 | 0.025156 | 0.00063282 | 22.00994 | 0.06545  | 21.55 |
| 2332   | 2016 | 0.21  | 0.04 | 0.025156 | 0.00063282 | 22.00994 | 0.06545  | 21.55 |
| 2389   | 2016 | 0.687 | 0.04 | 0.025156 | 0.00063282 | 22.01345 | 0.040215 | 21.08 |
| 2403   | 2016 | -0.61 | 0.04 | 0.025156 | 0.00063282 | 21.96524 | 0.06258  | 35.07 |
| 600267 | 2016 | -0.41 | 0.04 | 0.025156 | 0.00063282 | 23.16    | 0.007694 | 33.22 |
| 2126   | 2016 | -0.45 | 0.04 | 0.025156 | 0.00063282 | 22.29066 | 0.105559 | 11.16 |
| 603996 | 2016 | -0.57 | 0.04 | 0.025156 | 0.00063282 | 21.85161 | 0.084294 | 51.16 |
| 600267 | 2016 | 0.805 | 0.04 | 0.025156 | 0.00063282 | 23.75621 | 0.007694 | 33.22 |
| 2489   | 2016 | -0.77 | 0.04 | 0.025156 | 0.00063282 | 22.59929 | 0.012826 | 37.94 |
| 2003   | 2016 | 0.375 | 0.04 | 0.025156 | 0.00063282 | 21.56284 | 0.138799 | 29.47 |
| 2532   | 2016 | -0.35 | 0.04 | 0.025156 | 0.00063282 | 21.55662 | 0.078083 | 20.88 |
| 603085 | 2016 | -0.07 | 0.04 | 0.025156 | 0.00063282 | 20.80931 | 0.03818  | 48.25 |
| 2032   | 2016 | -0.29 | 0.04 | 0.025156 | 0.00063282 | 22.16546 | 0.24877  | 74.18 |
| 2472   | 2016 | -0.13 | 0.04 | 0.025156 | 0.00063282 | 22.08555 | 0.061629 | 8.86  |
| 913    | 2016 | -0.44 | 0.04 | 0.025156 | 0.00063282 | 21.56904 | 0.129651 | 29.77 |
| 2131   | 2016 | -0.77 | 0.04 | 0.025156 | 0.00063282 | 23.14387 | 0.077826 | 15.05 |
| 2389   | 2016 | 0.687 | 0.04 | 0.025156 | 0.00063282 | 22.1055  | 0.040215 | 21.08 |

|        |      |       |      |          |            |          |          |       |
|--------|------|-------|------|----------|------------|----------|----------|-------|
| 603222 | 2016 | -0.6  | 0.04 | 0.025156 | 0.00063282 | 20.64252 | 0.048987 | 36.2  |
| 600521 | 2016 | 1.117 | 0.04 | 0.025156 | 0.00063282 | 22.5074  | 0.099807 | 26.45 |
| 300256 | 2016 | -0.36 | 0.04 | 0.025156 | 0.00063282 | 22.78303 | 0.043432 | 13.67 |
| 2403   | 2016 | -0.62 | 0.04 | 0.025156 | 0.00063282 | 21.96524 | 0.06258  | 35.07 |
| 2099   | 2016 | 0.159 | 0.04 | 0.025156 | 0.00063282 | 22.6556  | 0.047075 | 35.49 |
| 2489   | 2016 | -0.77 | 0.04 | 0.025156 | 0.00063282 | 22.58952 | 0.012826 | 37.94 |
| 2372   | 2016 | -0.47 | 0.04 | 0.025156 | 0.00063282 | 22.02378 | 0.244154 | 36.46 |
| 603222 | 2016 | -0.39 | 0.04 | 0.025156 | 0.00063282 | 20.64252 | 0.048987 | 36.2  |
| 603010 | 2016 | 0.162 | 0.04 | 0.025156 | 0.00063282 | 21.06382 | 0.141749 | 29.35 |
| 2250   | 2016 | 0.795 | 0.04 | 0.025156 | 0.00063282 | 22.5152  | 0.06126  | 30.5  |
| 2099   | 2016 | 0.018 | 0.04 | 0.025156 | 0.00063282 | 22.6556  | 0.047075 | 35.49 |
| 2126   | 2016 | -0.56 | 0.04 | 0.025156 | 0.00063282 | 22.02424 | 0.105559 | 11.16 |
| 2332   | 2016 | -0.73 | 0.04 | 0.025156 | 0.00063282 | 22.00994 | 0.06545  | 21.55 |
| 2126   | 2016 | -0.56 | 0.04 | 0.025156 | 0.00063282 | 22.29066 | 0.105559 | 11.16 |
| 2403   | 2016 | -0.68 | 0.04 | 0.025156 | 0.00063282 | 21.96524 | 0.06258  | 35.07 |
| 913    | 2016 | -0.38 | 0.04 | 0.025156 | 0.00063282 | 22.00234 | 0.129651 | 29.77 |
| 2326   | 2016 | 0.169 | 0.04 | 0.025156 | 0.00063282 | 22.07777 | 0.128512 | 23.84 |
| 2403   | 2016 | -0.53 | 0.04 | 0.025156 | 0.00063282 | 21.96524 | 0.06258  | 35.07 |
| 2372   | 2016 | -0.74 | 0.04 | 0.025156 | 0.00063282 | 22.02378 | 0.244154 | 36.46 |
| 2332   | 2016 | 0.467 | 0.04 | 0.025156 | 0.00063282 | 22.00994 | 0.06545  | 21.55 |
| 600521 | 2016 | 1.117 | 0.04 | 0.025156 | 0.00063282 | 22.6293  | 0.099807 | 26.45 |
| 2131   | 2016 | -0.63 | 0.04 | 0.025156 | 0.00063282 | 23.14387 | 0.077826 | 15.05 |
| 600521 | 2016 | 1.038 | 0.04 | 0.025156 | 0.00063282 | 22.6293  | 0.099807 | 26.45 |
| 2403   | 2016 | -0.71 | 0.04 | 0.025156 | 0.00063282 | 21.96524 | 0.06258  | 35.07 |
| 2126   | 2016 | -0.56 | 0.04 | 0.025156 | 0.00063282 | 22.29066 | 0.105559 | 11.16 |
| 2686   | 2016 | 0.229 | 0.04 | 0.025156 | 0.00063282 | 21.23388 | 0.131729 | 18.56 |
| 2403   | 2016 | -0.64 | 0.04 | 0.025156 | 0.00063282 | 21.96524 | 0.06258  | 35.07 |
| 600521 | 2016 | 1.117 | 0.04 | 0.025156 | 0.00063282 | 22.6293  | 0.099807 | 26.45 |
| 2664   | 2016 | 0.009 | 0.04 | 0.025156 | 0.00063282 | 21.68109 | 0.130361 | 25.7  |
| 2003   | 2016 | -0.24 | 0.04 | 0.025156 | 0.00063282 | 21.7071  | 0.138799 | 29.47 |
| 603996 | 2016 | -0.57 | 0.04 | 0.025156 | 0.00063282 | 21.85493 | 0.084294 | 51.16 |
| 603996 | 2016 | -0.57 | 0.04 | 0.025156 | 0.00063282 | 21.85493 | 0.084294 | 51.16 |
| 2489   | 2016 | -0.77 | 0.04 | 0.025156 | 0.00063282 | 22.59929 | 0.012826 | 37.94 |
| 2273   | 2016 | -0.56 | 0.04 | 0.025156 | 0.00063282 | 21.94828 | 0.088076 | 21.27 |
| 2403   | 2016 | -0.53 | 0.04 | 0.025156 | 0.00063282 | 21.78985 | 0.06258  | 35.07 |
| 2032   | 2016 | -0.47 | 0.04 | 0.025156 | 0.00063282 | 22.16546 | 0.24877  | 74.18 |
| 2250   | 2016 | -0.43 | 0.04 | 0.025156 | 0.00063282 | 22.5152  | 0.06126  | 30.5  |
| 2126   | 2016 | -0.21 | 0.04 | 0.025156 | 0.00063282 | 22.29066 | 0.105559 | 11.16 |
| 300256 | 2016 | -0.27 | 0.04 | 0.025156 | 0.00063282 | 22.78303 | 0.043432 | 13.67 |
| 2273   | 2016 | -0.35 | 0.04 | 0.025156 | 0.00063282 | 21.94828 | 0.088076 | 21.27 |
| 2664   | 2016 | -0.26 | 0.04 | 0.025156 | 0.00063282 | 21.60276 | 0.130361 | 25.7  |
| 2389   | 2016 | 0.687 | 0.04 | 0.025156 | 0.00063282 | 22.1055  | 0.040215 | 21.08 |
| 2021   | 2016 | -0.31 | 0.04 | 0.025156 | 0.00063282 | 21.28049 | 0.016522 | 17.45 |
| 600267 | 2016 | 0.255 | 0.04 | 0.025156 | 0.00063282 | 23.75621 | 0.007694 | 33.22 |
| 300256 | 2016 | -0.53 | 0.04 | 0.025156 | 0.00063282 | 22.06105 | 0.043432 | 13.67 |
| 2003   | 2016 | -0.39 | 0.04 | 0.025156 | 0.00063282 | 21.7071  | 0.138799 | 29.47 |
| 2131   | 2016 | -0.61 | 0.04 | 0.025156 | 0.00063282 | 23.14387 | 0.077826 | 15.05 |
| 2003   | 2016 | -0.39 | 0.04 | 0.025156 | 0.00063282 | 21.7071  | 0.138799 | 29.47 |
| 2273   | 2016 | 0.103 | 0.04 | 0.025156 | 0.00063282 | 21.94828 | 0.088076 | 21.27 |
| 600521 | 2016 | 0.705 | 0.04 | 0.025156 | 0.00063282 | 22.6293  | 0.099807 | 26.45 |
| 300256 | 2016 | -0.35 | 0.04 | 0.025156 | 0.00063282 | 22.78303 | 0.043432 | 13.67 |
| 2273   | 2016 | -0.56 | 0.04 | 0.025156 | 0.00063282 | 21.94828 | 0.088076 | 21.27 |
| 2472   | 2016 | -0.14 | 0.04 | 0.025156 | 0.00063282 | 22.08555 | 0.061629 | 8.86  |
| 2126   | 2016 | -0.37 | 0.04 | 0.025156 | 0.00063282 | 22.29066 | 0.105559 | 11.16 |

|        |      |       |      |          |            |          |          |       |
|--------|------|-------|------|----------|------------|----------|----------|-------|
| 2099   | 2016 | 0.705 | 0.04 | 0.025156 | 0.00063282 | 22.6556  | 0.047075 | 35.49 |
| 2725   | 2016 | -0.61 | 0.04 | 0.025156 | 0.00063282 | 20.76069 | 0.04983  | 13.12 |
| 2126   | 2016 | -0.05 | 0.04 | 0.025156 | 0.00063282 | 22.29066 | 0.105559 | 11.16 |
| 2664   | 2016 | -0.18 | 0.04 | 0.025156 | 0.00063282 | 21.68109 | 0.130361 | 25.7  |
| 2032   | 2016 | -0.49 | 0.04 | 0.025156 | 0.00063282 | 22.16546 | 0.24877  | 74.18 |
| 2032   | 2016 | -0.66 | 0.04 | 0.025156 | 0.00063282 | 22.16546 | 0.24877  | 74.18 |
| 2099   | 2016 | 0.464 | 0.04 | 0.025156 | 0.00063282 | 22.6556  | 0.047075 | 35.49 |
| 2131   | 2016 | 0.329 | 0.04 | 0.025156 | 0.00063282 | 23.14387 | 0.077826 | 15.05 |
| 300351 | 2016 | -0.02 | 0.04 | 0.025156 | 0.00063282 | 21.85667 | 0.057906 | 15.71 |
| 2664   | 2016 | -0.14 | 0.04 | 0.025156 | 0.00063282 | 21.68109 | 0.130361 | 25.7  |
| 2403   | 2016 | -0.64 | 0.04 | 0.025156 | 0.00063282 | 21.96524 | 0.06258  | 35.07 |
| 300351 | 2016 | 0.028 | 0.04 | 0.025156 | 0.00063282 | 21.85667 | 0.057906 | 15.71 |
| 300351 | 2016 | 0.258 | 0.04 | 0.025156 | 0.00063282 | 21.85667 | 0.057906 | 15.71 |
| 2126   | 2016 | -0.56 | 0.04 | 0.025156 | 0.00063282 | 22.29066 | 0.105559 | 11.16 |
| 2664   | 2016 | -0.06 | 0.04 | 0.025156 | 0.00063282 | 21.68109 | 0.130361 | 25.7  |
| 2250   | 2016 | 0.795 | 0.04 | 0.025156 | 0.00063282 | 22.24379 | 0.06126  | 30.5  |
| 2021   | 2016 | -0.31 | 0.04 | 0.025156 | 0.00063282 | 21.28049 | 0.016522 | 17.45 |
| 2332   | 2016 | -0.73 | 0.04 | 0.025156 | 0.00063282 | 22.00994 | 0.06545  | 21.55 |
| 300351 | 2016 | -0.24 | 0.04 | 0.025156 | 0.00063282 | 21.85667 | 0.057906 | 15.71 |
| 2273   | 2016 | 0.078 | 0.04 | 0.025156 | 0.00063282 | 21.84847 | 0.088076 | 21.27 |
| 2686   | 2016 | 0.229 | 0.04 | 0.025156 | 0.00063282 | 21.23388 | 0.131729 | 18.56 |
| 603085 | 2016 | -0.07 | 0.04 | 0.025156 | 0.00063282 | 20.82599 | 0.03818  | 48.25 |
| 2389   | 2016 | 0.099 | 0.04 | 0.025156 | 0.00063282 | 22.1055  | 0.040215 | 21.08 |
| 2032   | 2016 | -0.23 | 0.04 | 0.025156 | 0.00063282 | 22.16546 | 0.24877  | 74.18 |
| 2641   | 2016 | -0.43 | 0.04 | 0.025156 | 0.00063282 | 22.19291 | 0.084559 | 42.05 |
| 2641   | 2016 | 0.258 | 0.04 | 0.025156 | 0.00063282 | 22.19291 | 0.084559 | 42.05 |
| 2641   | 2016 | -0.14 | 0.04 | 0.025156 | 0.00063282 | 22.19291 | 0.084559 | 42.05 |
| 2641   | 2016 | -0.7  | 0.04 | 0.025156 | 0.00063282 | 22.19291 | 0.084559 | 42.05 |
| 300351 | 2016 | -0.14 | 0.04 | 0.025156 | 0.00063282 | 21.85667 | 0.057906 | 15.71 |
| 2389   | 2016 | -0.06 | 0.04 | 0.025156 | 0.00063282 | 22.1055  | 0.040215 | 21.08 |
| 2032   | 2016 | -0.23 | 0.04 | 0.025156 | 0.00063282 | 22.16546 | 0.24877  | 74.18 |
| 2273   | 2016 | -0.22 | 0.04 | 0.025156 | 0.00063282 | 21.94828 | 0.088076 | 21.27 |
| 2489   | 2016 | -0.77 | 0.04 | 0.025156 | 0.00063282 | 22.59929 | 0.012826 | 37.94 |
| 2250   | 2016 | 0.795 | 0.04 | 0.025156 | 0.00063282 | 22.5152  | 0.06126  | 30.5  |
| 913    | 2016 | -0.27 | 0.04 | 0.025156 | 0.00063282 | 22.00234 | 0.129651 | 29.77 |
| 2099   | 2016 | 0.18  | 0.04 | 0.025156 | 0.00063282 | 22.6556  | 0.047075 | 35.49 |
| 600267 | 2016 | 0.917 | 0.04 | 0.025156 | 0.00063282 | 23.75621 | 0.007694 | 33.22 |
| 2250   | 2016 | -0.53 | 0.04 | 0.025156 | 0.00063282 | 22.5152  | 0.06126  | 30.5  |
| 2664   | 2016 | -0.15 | 0.04 | 0.025156 | 0.00063282 | 21.68109 | 0.130361 | 25.7  |
| 2641   | 2016 | -0.26 | 0.04 | 0.025156 | 0.00063282 | 22.19291 | 0.084559 | 42.05 |
| 2021   | 2016 | -0.31 | 0.04 | 0.025156 | 0.00063282 | 21.28049 | 0.016522 | 17.45 |
| 300351 | 2016 | -0.04 | 0.04 | 0.025156 | 0.00063282 | 21.85667 | 0.057906 | 15.71 |
| 2250   | 2016 | 0.251 | 0.04 | 0.025156 | 0.00063282 | 22.5152  | 0.06126  | 30.5  |
| 2250   | 2016 | 0.795 | 0.04 | 0.025156 | 0.00063282 | 22.5152  | 0.06126  | 30.5  |
| 603456 | 2016 | 0.765 | 0.04 | 0.025156 | 0.00063282 | 21.82148 | 0.043391 | 44.43 |
| 2372   | 2016 | -0.62 | 0.04 | 0.025156 | 0.00063282 | 22.02378 | 0.244154 | 36.46 |
| 2641   | 2016 | -0.5  | 0.04 | 0.025156 | 0.00063282 | 22.19291 | 0.084559 | 42.05 |
| 2326   | 2016 | 0.561 | 0.04 | 0.025156 | 0.00063282 | 22.21956 | 0.128512 | 23.84 |
| 600267 | 2016 | -0.41 | 0.04 | 0.025156 | 0.00063282 | 23.75621 | 0.007694 | 33.22 |
| 2326   | 2016 | 0.512 | 0.04 | 0.025156 | 0.00063282 | 22.21956 | 0.128512 | 23.84 |
| 2126   | 2016 | 0.098 | 0.04 | 0.025156 | 0.00063282 | 22.29066 | 0.105559 | 11.16 |
| 2021   | 2016 | -0.31 | 0.04 | 0.025156 | 0.00063282 | 21.28049 | 0.016522 | 17.45 |
| 2032   | 2016 | -0.69 | 0.04 | 0.025156 | 0.00063282 | 22.16546 | 0.24877  | 74.18 |
| 2021   | 2016 | -0.31 | 0.04 | 0.025156 | 0.00063282 | 21.28049 | 0.016522 | 17.45 |

|        |      |       |      |          |            |          |          |       |
|--------|------|-------|------|----------|------------|----------|----------|-------|
| 2326   | 2016 | 0.512 | 0.04 | 0.025156 | 0.00063282 | 22.21956 | 0.128512 | 23.84 |
| 2326   | 2016 | 0.69  | 0.04 | 0.025156 | 0.00063282 | 22.21956 | 0.128512 | 23.84 |
| 2641   | 2016 | -0.43 | 0.04 | 0.025156 | 0.00063282 | 22.19291 | 0.084559 | 42.05 |
| 2250   | 2016 | 0.795 | 0.04 | 0.025156 | 0.00063282 | 22.5152  | 0.06126  | 30.5  |
| 600521 | 2016 | 1.117 | 0.04 | 0.025156 | 0.00063282 | 22.6293  | 0.099807 | 26.45 |
| 2032   | 2016 | -0.24 | 0.04 | 0.025156 | 0.00063282 | 22.78431 | 0.24877  | 74.18 |
| 2641   | 2016 | -0.1  | 0.04 | 0.025156 | 0.00063282 | 22.19291 | 0.084559 | 42.05 |
| 2021   | 2016 | -0.31 | 0.04 | 0.025156 | 0.00063282 | 21.28049 | 0.016522 | 17.45 |
| 2250   | 2016 | 0.795 | 0.04 | 0.025156 | 0.00063282 | 22.5152  | 0.06126  | 30.5  |
| 603222 | 2016 | -0.28 | 0.04 | 0.025156 | 0.00063282 | 20.64252 | 0.048987 | 36.2  |
| 2099   | 2016 | 0.705 | 0.04 | 0.025156 | 0.00063282 | 22.6556  | 0.047075 | 35.49 |
| 2032   | 2016 | -0.23 | 0.04 | 0.025156 | 0.00063282 | 22.16546 | 0.24877  | 74.18 |
| 2372   | 2016 | -0.62 | 0.04 | 0.025156 | 0.00063282 | 21.86034 | 0.244154 | 36.46 |
| 2686   | 2016 | -0.12 | 0.04 | 0.025156 | 0.00063282 | 21.23388 | 0.131729 | 18.56 |
| 2126   | 2016 | 0.098 | 0.04 | 0.025156 | 0.00063282 | 22.29066 | 0.105559 | 11.16 |
| 2686   | 2016 | 0.229 | 0.04 | 0.025156 | 0.00063282 | 21.23388 | 0.131729 | 18.56 |
| 2389   | 2016 | 0.687 | 0.04 | 0.025156 | 0.00063282 | 22.1055  | 0.040215 | 21.08 |
| 2686   | 2016 | 0.229 | 0.04 | 0.025156 | 0.00063282 | 21.23388 | 0.131729 | 18.56 |
| 2664   | 2016 | 0.009 | 0.04 | 0.025156 | 0.00063282 | 21.68109 | 0.130361 | 25.7  |
| 2532   | 2016 | -0.66 | 0.04 | 0.025156 | 0.00063282 | 21.55662 | 0.078083 | 20.88 |
| 2126   | 2016 | -0.05 | 0.04 | 0.025156 | 0.00063282 | 22.29066 | 0.105559 | 11.16 |
| 2532   | 2016 | -0.56 | 0.04 | 0.025156 | 0.00063282 | 21.55662 | 0.078083 | 20.88 |
| 300256 | 2016 | -0.05 | 0.04 | 0.025156 | 0.00063282 | 22.78303 | 0.043432 | 13.67 |
| 603010 | 2016 | 0.162 | 0.04 | 0.025156 | 0.00063282 | 21.06382 | 0.141749 | 29.35 |
| 2331   | 2016 | 0.34  | 0.03 | 1.758352 | 3.0918027  | 21.35464 | 0.062351 | 7.84  |
| 600551 | 2016 | -0.78 | 0.03 | 1.758352 | 3.0918027  | 22.75795 | 0.077659 | 56.79 |
| 603011 | 2016 | -0.16 | 0.03 | 1.758352 | 3.0918027  | 21.33598 | 0.030579 | 33.01 |
| 603011 | 2016 | 0.022 | 0.03 | 1.758352 | 3.0918027  | 21.42386 | 0.030579 | 33.01 |
| 521    | 2016 | -0.22 | 0.03 | 1.758352 | 3.0918027  | 23.2496  | 0.042618 | 22.47 |
| 713    | 2016 | 0.499 | 0.03 | 1.758352 | 3.0918027  | 21.4522  | 0.015985 | 34.11 |
| 300247 | 2016 | -0.49 | 0.03 | 1.758352 | 3.0918027  | 21.74753 | 0.033268 | 14.44 |
| 859    | 2016 | 0.249 | 0.03 | 1.758352 | 3.0918027  | 21.45988 | 0.006043 | 24.6  |
| 713    | 2016 | 0.15  | 0.03 | 1.758352 | 3.0918027  | 21.4522  | 0.015985 | 34.11 |
| 600761 | 2016 | -0.13 | 0.03 | 1.758352 | 3.0918027  | 22.45457 | 0.102028 | 37.97 |
| 300247 | 2016 | 0.534 | 0.03 | 1.758352 | 3.0918027  | 21.74753 | 0.033268 | 14.44 |
| 300009 | 2016 | 0.433 | 0.03 | 1.758352 | 3.0918027  | 21.39888 | 0.138741 | 27.95 |
| 2230   | 2016 | 2.451 | 0.03 | 1.758352 | 3.0918027  | 23.06641 | 0.068818 | 13.62 |
| 300388 | 2016 | -0.73 | 0.03 | 1.758352 | 3.0918027  | 22.41277 | 0.089192 | 38.2  |
| 2230   | 2016 | 1.936 | 0.03 | 1.758352 | 3.0918027  | 23.06641 | 0.068818 | 13.62 |
| 600063 | 2016 | -0.6  | 0.03 | 1.758352 | 3.0918027  | 22.88809 | 0.030249 | 35.97 |
| 300087 | 2016 | 0.837 | 0.03 | 1.758352 | 3.0918027  | 21.08126 | 0.059895 | 10.93 |
| 600418 | 2016 | -0.51 | 0.03 | 1.758352 | 3.0918027  | 24.61946 | 0.078521 | 23.55 |
| 600063 | 2016 | -0.6  | 0.03 | 1.758352 | 3.0918027  | 22.88809 | 0.030249 | 35.97 |
| 300009 | 2016 | 1.124 | 0.03 | 1.758352 | 3.0918027  | 21.39888 | 0.138741 | 27.95 |
| 2230   | 2016 | 1.126 | 0.03 | 1.758352 | 3.0918027  | 23.06641 | 0.068818 | 13.62 |
| 2230   | 2016 | 1.568 | 0.03 | 1.758352 | 3.0918027  | 23.06641 | 0.068818 | 13.62 |
| 600418 | 2016 | 0.086 | 0.03 | 1.758352 | 3.0918027  | 24.61946 | 0.078521 | 23.55 |
| 600761 | 2016 | -0.16 | 0.03 | 1.758352 | 3.0918027  | 22.57654 | 0.102028 | 37.97 |
| 2230   | 2016 | 1.126 | 0.03 | 1.758352 | 3.0918027  | 23.06641 | 0.068818 | 13.62 |
| 600418 | 2016 | 0.096 | 0.03 | 1.758352 | 3.0918027  | 24.61946 | 0.078521 | 23.55 |
| 300009 | 2016 | 1.124 | 0.03 | 1.758352 | 3.0918027  | 21.39888 | 0.138741 | 27.95 |
| 300009 | 2016 | 1.124 | 0.03 | 1.758352 | 3.0918027  | 21.39888 | 0.138741 | 27.95 |
| 2541   | 2016 | -0.13 | 0.03 | 1.758352 | 3.0918027  | 22.54735 | 0.037979 | 37.03 |
| 300388 | 2016 | 0.357 | 0.03 | 1.758352 | 3.0918027  | 22.41277 | 0.089192 | 38.2  |



|        |      |       |      |          |           |          |          |       |
|--------|------|-------|------|----------|-----------|----------|----------|-------|
| 600418 | 2016 | -0.51 | 0.03 | 1.758352 | 3.0918027 | 24.61946 | 0.078521 | 23.55 |
| 600551 | 2016 | -0.78 | 0.03 | 1.758352 | 3.0918027 | 22.75795 | 0.077659 | 56.79 |
| 300274 | 2016 | 0.442 | 0.03 | 1.758352 | 3.0918027 | 23.15889 | 0.091576 | 31.89 |
| 2230   | 2016 | 2.451 | 0.03 | 1.758352 | 3.0918027 | 23.06641 | 0.068818 | 13.62 |
| 2743   | 2016 | -0.16 | 0.03 | 1.758352 | 3.0918027 | 22.41286 | 0.026387 | 38.56 |
| 300274 | 2016 | 0.442 | 0.03 | 1.758352 | 3.0918027 | 23.17916 | 0.091576 | 31.89 |
| 859    | 2016 | 0.9   | 0.03 | 1.758352 | 3.0918027 | 21.45988 | 0.006043 | 24.6  |
| 600551 | 2016 | -0.22 | 0.03 | 1.758352 | 3.0918027 | 22.75795 | 0.077659 | 56.79 |
| 300218 | 2016 | -0.01 | 0.03 | 1.758352 | 3.0918027 | 21.37617 | 0.06094  | 21.9  |
| 600418 | 2016 | -0.51 | 0.03 | 1.758352 | 3.0918027 | 24.317   | 0.078521 | 23.55 |
| 2230   | 2016 | 1.885 | 0.03 | 1.758352 | 3.0918027 | 22.73648 | 0.068818 | 13.62 |
| 2230   | 2016 | 1.764 | 0.03 | 1.758352 | 3.0918027 | 23.06641 | 0.068818 | 13.62 |
| 2230   | 2016 | 1.126 | 0.03 | 1.758352 | 3.0918027 | 23.06641 | 0.068818 | 13.62 |
| 600418 | 2016 | -0.39 | 0.03 | 1.758352 | 3.0918027 | 24.61946 | 0.078521 | 23.55 |
| 600418 | 2016 | -0.01 | 0.03 | 1.758352 | 3.0918027 | 24.61946 | 0.078521 | 23.55 |
| 300087 | 2016 | 0.837 | 0.03 | 1.758352 | 3.0918027 | 21.08126 | 0.059895 | 10.93 |
| 2743   | 2016 | -0.82 | 0.03 | 1.758352 | 3.0918027 | 22.38754 | 0.026387 | 38.56 |
| 600063 | 2016 | -0.6  | 0.03 | 1.758352 | 3.0918027 | 22.88809 | 0.030249 | 35.97 |
| 600444 | 2016 | 0.854 | 0.03 | 1.758352 | 3.0918027 | 20.60537 | 0.045852 | 36.82 |
| 868    | 2016 | -0.37 | 0.03 | 1.758352 | 3.0918027 | 22.92917 | 0.031806 | 21.13 |
| 600418 | 2016 | -0.23 | 0.03 | 1.758352 | 3.0918027 | 24.61946 | 0.078521 | 23.55 |
| 603011 | 2016 | -0.53 | 0.03 | 1.758352 | 3.0918027 | 21.42386 | 0.030579 | 33.01 |
| 300218 | 2016 | -0.12 | 0.03 | 1.758352 | 3.0918027 | 21.31152 | 0.06094  | 21.9  |
| 2541   | 2016 | -0.13 | 0.03 | 1.758352 | 3.0918027 | 22.76136 | 0.037979 | 37.03 |
| 300009 | 2016 | 1.124 | 0.03 | 1.758352 | 3.0918027 | 21.19948 | 0.138741 | 27.95 |
| 600063 | 2016 | 0.081 | 0.03 | 1.758352 | 3.0918027 | 22.82509 | 0.030249 | 35.97 |
| 300247 | 2016 | 0.826 | 0.03 | 1.758352 | 3.0918027 | 21.74753 | 0.033268 | 14.44 |
| 600418 | 2016 | 0.047 | 0.03 | 1.758352 | 3.0918027 | 24.61946 | 0.078521 | 23.55 |
| 868    | 2016 | -0.27 | 0.03 | 1.758352 | 3.0918027 | 22.92917 | 0.031806 | 21.13 |
| 868    | 2016 | -0.19 | 0.03 | 1.758352 | 3.0918027 | 22.92917 | 0.031806 | 21.13 |
| 300274 | 2016 | 0.442 | 0.03 | 1.758352 | 3.0918027 | 23.17916 | 0.091576 | 31.89 |
| 2743   | 2016 | -0.4  | 0.03 | 1.758352 | 3.0918027 | 22.41286 | 0.026387 | 38.56 |
| 713    | 2016 | -0.64 | 0.03 | 1.758352 | 3.0918027 | 21.4522  | 0.015985 | 34.11 |
| 600444 | 2016 | 0.384 | 0.03 | 1.758352 | 3.0918027 | 20.60537 | 0.045852 | 36.82 |
| 600983 | 2016 | 0.128 | 0.03 | 1.758352 | 3.0918027 | 22.91816 | 0.069601 | 51    |
| 300247 | 2016 | -0.49 | 0.03 | 1.758352 | 3.0918027 | 21.74753 | 0.033268 | 14.44 |
| 2230   | 2016 | 2.196 | 0.03 | 1.758352 | 3.0918027 | 23.06641 | 0.068818 | 13.62 |
| 713    | 2016 | 0.602 | 0.03 | 1.758352 | 3.0918027 | 21.4522  | 0.015985 | 34.11 |
| 300274 | 2016 | 0.442 | 0.03 | 1.758352 | 3.0918027 | 23.17916 | 0.091576 | 31.89 |
| 600418 | 2016 | -0.04 | 0.03 | 1.758352 | 3.0918027 | 24.61946 | 0.078521 | 23.55 |
| 521    | 2016 | 0.242 | 0.03 | 1.758352 | 3.0918027 | 23.2496  | 0.042618 | 22.47 |
| 2541   | 2016 | -0.66 | 0.03 | 1.758352 | 3.0918027 | 22.76136 | 0.037979 | 37.03 |
| 2230   | 2016 | 2.12  | 0.03 | 1.758352 | 3.0918027 | 23.06641 | 0.068818 | 13.62 |
| 600418 | 2016 | 0.296 | 0.03 | 1.758352 | 3.0918027 | 24.61946 | 0.078521 | 23.55 |
| 2557   | 2016 | -0.34 | 0.03 | 1.758352 | 3.0918027 | 22.10423 | 0.118436 | 49.95 |
| 300218 | 2016 | 0.434 | 0.03 | 1.758352 | 3.0918027 | 21.31152 | 0.06094  | 21.9  |
| 2331   | 2016 | 1.33  | 0.03 | 1.758352 | 3.0918027 | 21.35464 | 0.062351 | 7.84  |
| 2743   | 2016 | -0.31 | 0.03 | 1.758352 | 3.0918027 | 22.41286 | 0.026387 | 38.56 |
| 600418 | 2016 | -0.11 | 0.03 | 1.758352 | 3.0918027 | 24.61946 | 0.078521 | 23.55 |
| 300009 | 2016 | -0.08 | 0.03 | 1.758352 | 3.0918027 | 21.39888 | 0.138741 | 27.95 |
| 600990 | 2016 | 0.246 | 0.03 | 1.758352 | 3.0918027 | 21.91589 | 0.190419 | 39.83 |
| 859    | 2016 | 0.249 | 0.03 | 1.758352 | 3.0918027 | 21.45988 | 0.006043 | 24.6  |
| 2230   | 2016 | 1.126 | 0.03 | 1.758352 | 3.0918027 | 22.73648 | 0.068818 | 13.62 |
| 300388 | 2016 | -0.06 | 0.03 | 1.758352 | 3.0918027 | 22.41277 | 0.089192 | 38.2  |

|        |      |       |      |          |           |          |          |       |
|--------|------|-------|------|----------|-----------|----------|----------|-------|
| 600990 | 2016 | 0.244 | 0.03 | 1.758352 | 3.0918027 | 22.0214  | 0.190419 | 39.83 |
| 300247 | 2016 | -0.49 | 0.03 | 1.758352 | 3.0918027 | 21.74753 | 0.033268 | 14.44 |
| 600418 | 2016 | 0.818 | 0.03 | 1.758352 | 3.0918027 | 24.61946 | 0.078521 | 23.55 |
| 300009 | 2016 | 1.124 | 0.03 | 1.758352 | 3.0918027 | 21.39888 | 0.138741 | 27.95 |
| 300388 | 2016 | -0.2  | 0.03 | 1.758352 | 3.0918027 | 22.41277 | 0.089192 | 38.2  |
| 2140   | 2016 | 0.625 | 0.03 | 1.758352 | 3.0918027 | 22.48904 | 0.04058  | 58.33 |
| 600418 | 2016 | 0.047 | 0.03 | 1.758352 | 3.0918027 | 24.61946 | 0.078521 | 23.55 |
| 2557   | 2016 | -0.31 | 0.03 | 1.758352 | 3.0918027 | 22.10423 | 0.118436 | 49.95 |
| 600551 | 2016 | 0.439 | 0.03 | 1.758352 | 3.0918027 | 22.75795 | 0.077659 | 56.79 |
| 600551 | 2016 | -0.58 | 0.03 | 1.758352 | 3.0918027 | 22.75795 | 0.077659 | 56.79 |
| 600551 | 2016 | 0.439 | 0.03 | 1.758352 | 3.0918027 | 22.75795 | 0.077659 | 56.79 |
| 2331   | 2016 | 0.34  | 0.03 | 1.758352 | 3.0918027 | 21.35464 | 0.062351 | 7.84  |
| 300274 | 2016 | 0.442 | 0.03 | 1.758352 | 3.0918027 | 23.17916 | 0.091576 | 31.89 |
| 600551 | 2016 | -0.89 | 0.03 | 1.758352 | 3.0918027 | 22.75795 | 0.077659 | 56.79 |
| 2690   | 2016 | 0.52  | 0.03 | 1.758352 | 3.0918027 | 21.57092 | 0.151118 | 61.45 |
| 2230   | 2016 | 1.126 | 0.03 | 1.758352 | 3.0918027 | 23.06641 | 0.068818 | 13.62 |
| 300274 | 2016 | 0.442 | 0.03 | 1.758352 | 3.0918027 | 23.17916 | 0.091576 | 31.89 |
| 600063 | 2016 | -0.6  | 0.03 | 1.758352 | 3.0918027 | 22.88809 | 0.030249 | 35.97 |
| 603011 | 2016 | 0.022 | 0.03 | 1.758352 | 3.0918027 | 21.42386 | 0.030579 | 33.01 |
| 600418 | 2016 | -0.51 | 0.03 | 1.758352 | 3.0918027 | 24.61946 | 0.078521 | 23.55 |
| 2541   | 2016 | -0.66 | 0.03 | 1.758352 | 3.0918027 | 22.76136 | 0.037979 | 37.03 |
| 2557   | 2016 | -0.31 | 0.03 | 1.758352 | 3.0918027 | 22.16313 | 0.118436 | 49.95 |
| 300247 | 2016 | -0.49 | 0.03 | 1.758352 | 3.0918027 | 21.74753 | 0.033268 | 14.44 |
| 300087 | 2016 | 0.837 | 0.03 | 1.758352 | 3.0918027 | 21.08126 | 0.059895 | 10.93 |
| 300247 | 2016 | -0.38 | 0.03 | 1.758352 | 3.0918027 | 21.74753 | 0.033268 | 14.44 |
| 300087 | 2016 | 0.837 | 0.03 | 1.758352 | 3.0918027 | 21.08126 | 0.059895 | 10.93 |
| 713    | 2016 | 0.118 | 0.03 | 1.758352 | 3.0918027 | 21.4522  | 0.015985 | 34.11 |
| 300218 | 2016 | 0.434 | 0.03 | 1.758352 | 3.0918027 | 21.31152 | 0.06094  | 21.9  |
| 300247 | 2016 | -0.09 | 0.03 | 1.758352 | 3.0918027 | 21.74753 | 0.033268 | 14.44 |
| 521    | 2016 | 0.119 | 0.03 | 1.758352 | 3.0918027 | 23.2496  | 0.042618 | 22.47 |
| 603308 | 2016 | -0.1  | 0.03 | 1.758352 | 3.0918027 | 22.57868 | 0.018799 | 30.6  |
| 600418 | 2016 | -0.24 | 0.03 | 1.758352 | 3.0918027 | 24.61946 | 0.078521 | 23.55 |
| 868    | 2016 | -0.2  | 0.03 | 1.758352 | 3.0918027 | 22.92917 | 0.031806 | 21.13 |
| 600444 | 2016 | 0.795 | 0.03 | 1.758352 | 3.0918027 | 20.41162 | 0.045852 | 36.82 |
| 2690   | 2016 | 0.52  | 0.03 | 1.758352 | 3.0918027 | 21.57092 | 0.151118 | 61.45 |
| 2541   | 2016 | -0.26 | 0.03 | 1.758352 | 3.0918027 | 22.76136 | 0.037979 | 37.03 |
| 2230   | 2016 | 2.334 | 0.03 | 1.758352 | 3.0918027 | 23.06641 | 0.068818 | 13.62 |
| 300218 | 2016 | -0.01 | 0.03 | 1.758352 | 3.0918027 | 21.31152 | 0.06094  | 21.9  |
| 600418 | 2016 | -0.2  | 0.03 | 1.758352 | 3.0918027 | 24.61946 | 0.078521 | 23.55 |
| 600418 | 2016 | 0.047 | 0.03 | 1.758352 | 3.0918027 | 24.61946 | 0.078521 | 23.55 |
| 859    | 2016 | 0.242 | 0.03 | 1.758352 | 3.0918027 | 21.45988 | 0.006043 | 24.6  |
| 2743   | 2016 | -0.36 | 0.03 | 1.758352 | 3.0918027 | 22.41286 | 0.026387 | 38.56 |
| 300388 | 2016 | -0.41 | 0.03 | 1.758352 | 3.0918027 | 22.41277 | 0.089192 | 38.2  |
| 300218 | 2016 | -0.12 | 0.03 | 1.758352 | 3.0918027 | 21.31152 | 0.06094  | 21.9  |
| 600551 | 2016 | 0.439 | 0.03 | 1.758352 | 3.0918027 | 22.75795 | 0.077659 | 56.79 |
| 600063 | 2016 | 0.081 | 0.03 | 1.758352 | 3.0918027 | 22.88809 | 0.030249 | 35.97 |
| 521    | 2016 | -0.21 | 0.03 | 1.758352 | 3.0918027 | 23.2496  | 0.042618 | 22.47 |
| 859    | 2016 | -0.29 | 0.03 | 1.758352 | 3.0918027 | 21.36398 | 0.006043 | 24.6  |
| 2230   | 2016 | 2.077 | 0.03 | 1.758352 | 3.0918027 | 22.73648 | 0.068818 | 13.62 |
| 600418 | 2016 | 0.047 | 0.03 | 1.758352 | 3.0918027 | 24.61946 | 0.078521 | 23.55 |
| 600063 | 2016 | 0.061 | 0.03 | 1.758352 | 3.0918027 | 22.88809 | 0.030249 | 35.97 |
| 600990 | 2016 | 0.246 | 0.03 | 1.758352 | 3.0918027 | 22.0214  | 0.190419 | 39.83 |
| 600551 | 2016 | -0.89 | 0.03 | 1.758352 | 3.0918027 | 22.75795 | 0.077659 | 56.79 |
| 603308 | 2016 | -0.02 | 0.03 | 1.758352 | 3.0918027 | 22.57868 | 0.018799 | 30.6  |

|        |      |       |      |          |           |          |          |       |
|--------|------|-------|------|----------|-----------|----------|----------|-------|
| 2140   | 2016 | 0.638 | 0.03 | 1.758352 | 3.0918027 | 22.48904 | 0.04058  | 58.33 |
| 600990 | 2016 | 0.244 | 0.03 | 1.758352 | 3.0918027 | 22.0214  | 0.190419 | 39.83 |
| 2230   | 2016 | 2.451 | 0.03 | 1.758352 | 3.0918027 | 23.06641 | 0.068818 | 13.62 |
| 2690   | 2016 | 0.52  | 0.03 | 1.758352 | 3.0918027 | 21.57416 | 0.151118 | 61.45 |
| 2230   | 2016 | 2.451 | 0.03 | 1.758352 | 3.0918027 | 23.06641 | 0.068818 | 13.62 |
| 603308 | 2016 | -0.02 | 0.03 | 1.758352 | 3.0918027 | 22.57868 | 0.018799 | 30.6  |
| 603308 | 2016 | -0.04 | 0.03 | 1.758352 | 3.0918027 | 22.57868 | 0.018799 | 30.6  |
| 713    | 2016 | -0.64 | 0.03 | 1.758352 | 3.0918027 | 21.28745 | 0.015985 | 34.11 |
| 300247 | 2016 | 0.647 | 0.03 | 1.758352 | 3.0918027 | 21.74753 | 0.033268 | 14.44 |
| 300388 | 2016 | 0.357 | 0.03 | 1.758352 | 3.0918027 | 21.89434 | 0.089192 | 38.2  |
| 600418 | 2016 | 0.818 | 0.03 | 1.758352 | 3.0918027 | 24.61946 | 0.078521 | 23.55 |
| 2557   | 2016 | -0.45 | 0.03 | 1.758352 | 3.0918027 | 22.16313 | 0.118436 | 49.95 |
| 600990 | 2016 | 0.246 | 0.03 | 1.758352 | 3.0918027 | 22.0214  | 0.190419 | 39.83 |
| 600761 | 2016 | -0.34 | 0.03 | 1.758352 | 3.0918027 | 22.57654 | 0.102028 | 37.97 |
| 521    | 2016 | -0.18 | 0.03 | 1.758352 | 3.0918027 | 23.2496  | 0.042618 | 22.47 |
| 2557   | 2016 | -0.45 | 0.03 | 1.758352 | 3.0918027 | 22.10423 | 0.118436 | 49.95 |
| 868    | 2016 | -0.48 | 0.03 | 1.758352 | 3.0918027 | 22.92917 | 0.031806 | 21.13 |
| 521    | 2016 | -0.32 | 0.03 | 1.758352 | 3.0918027 | 23.2496  | 0.042618 | 22.47 |
| 2331   | 2016 | 1.444 | 0.03 | 1.758352 | 3.0918027 | 21.35464 | 0.062351 | 7.84  |
| 600418 | 2016 | -0.08 | 0.03 | 1.758352 | 3.0918027 | 24.61946 | 0.078521 | 23.55 |
| 2140   | 2016 | 0.625 | 0.03 | 1.758352 | 3.0918027 | 22.48904 | 0.04058  | 58.33 |
| 2140   | 2016 | 0.642 | 0.03 | 1.758352 | 3.0918027 | 22.48904 | 0.04058  | 58.33 |
| 300087 | 2016 | 0.837 | 0.03 | 1.758352 | 3.0918027 | 21.08126 | 0.059895 | 10.93 |
| 600418 | 2016 | 0.047 | 0.03 | 1.758352 | 3.0918027 | 24.61946 | 0.078521 | 23.55 |
| 300009 | 2016 | 1.124 | 0.03 | 1.758352 | 3.0918027 | 21.39888 | 0.138741 | 27.95 |
| 300247 | 2016 | -0.49 | 0.03 | 1.758352 | 3.0918027 | 21.74753 | 0.033268 | 14.44 |
| 300388 | 2016 | -0.73 | 0.03 | 1.758352 | 3.0918027 | 22.41277 | 0.089192 | 38.2  |
| 600990 | 2016 | 0.244 | 0.03 | 1.758352 | 3.0918027 | 22.0214  | 0.190419 | 39.83 |
| 300388 | 2016 | -0.06 | 0.03 | 1.758352 | 3.0918027 | 22.41277 | 0.089192 | 38.2  |
| 600444 | 2016 | 0.384 | 0.03 | 1.758352 | 3.0918027 | 20.60537 | 0.045852 | 36.82 |
| 2230   | 2016 | 2.375 | 0.03 | 1.758352 | 3.0918027 | 23.06641 | 0.068818 | 13.62 |
| 2230   | 2016 | 1.126 | 0.03 | 1.758352 | 3.0918027 | 23.06641 | 0.068818 | 13.62 |
| 600983 | 2016 | 0.128 | 0.03 | 1.758352 | 3.0918027 | 22.83463 | 0.069601 | 51    |
| 300247 | 2016 | 0.839 | 0.03 | 1.758352 | 3.0918027 | 21.74753 | 0.033268 | 14.44 |
| 300009 | 2016 | 1.124 | 0.03 | 1.758352 | 3.0918027 | 21.39888 | 0.138741 | 27.95 |
| 600418 | 2016 | 0.194 | 0.03 | 1.758352 | 3.0918027 | 24.61946 | 0.078521 | 23.55 |
| 600418 | 2016 | -0.24 | 0.03 | 1.758352 | 3.0918027 | 24.61946 | 0.078521 | 23.55 |
| 521    | 2016 | 0.007 | 0.03 | 1.758352 | 3.0918027 | 23.2496  | 0.042618 | 22.47 |
| 2230   | 2016 | 2.451 | 0.03 | 1.758352 | 3.0918027 | 23.06641 | 0.068818 | 13.62 |
| 2230   | 2016 | 2.451 | 0.03 | 1.758352 | 3.0918027 | 23.06641 | 0.068818 | 13.62 |
| 2140   | 2016 | 0.642 | 0.03 | 1.758352 | 3.0918027 | 22.47696 | 0.04058  | 58.33 |
| 521    | 2016 | -0.22 | 0.03 | 1.758352 | 3.0918027 | 23.04358 | 0.042618 | 22.47 |
| 2541   | 2016 | -0.13 | 0.03 | 1.758352 | 3.0918027 | 22.76136 | 0.037979 | 37.03 |
| 600444 | 2016 | 0.854 | 0.03 | 1.758352 | 3.0918027 | 20.60537 | 0.045852 | 36.82 |
| 603308 | 2016 | -0.1  | 0.03 | 1.758352 | 3.0918027 | 22.19792 | 0.018799 | 30.6  |
| 2743   | 2016 | -0.4  | 0.03 | 1.758352 | 3.0918027 | 22.41286 | 0.026387 | 38.56 |
| 2140   | 2016 | 0.638 | 0.03 | 1.758352 | 3.0918027 | 22.48904 | 0.04058  | 58.33 |
| 300009 | 2016 | 0.552 | 0.03 | 1.758352 | 3.0918027 | 21.39888 | 0.138741 | 27.95 |
| 859    | 2016 | 0.316 | 0.03 | 1.758352 | 3.0918027 | 21.45988 | 0.006043 | 24.6  |
| 600551 | 2016 | -0.68 | 0.03 | 1.758352 | 3.0918027 | 22.46095 | 0.077659 | 56.79 |
| 600418 | 2016 | -0.51 | 0.03 | 1.758352 | 3.0918027 | 24.61946 | 0.078521 | 23.55 |
| 600990 | 2016 | 0.244 | 0.03 | 1.758352 | 3.0918027 | 22.0214  | 0.190419 | 39.83 |
| 868    | 2016 | -0.37 | 0.03 | 1.758352 | 3.0918027 | 22.76208 | 0.031806 | 21.13 |
| 300388 | 2016 | -0.73 | 0.03 | 1.758352 | 3.0918027 | 22.41277 | 0.089192 | 38.2  |

|        |      |       |      |          |            |          |          |       |
|--------|------|-------|------|----------|------------|----------|----------|-------|
| 2230   | 2016 | 2.451 | 0.03 | 1.758352 | 3.0918027  | 23.06641 | 0.068818 | 13.62 |
| 600418 | 2016 | -0.51 | 0.03 | 1.758352 | 3.0918027  | 24.61946 | 0.078521 | 23.55 |
| 300009 | 2016 | 1.124 | 0.03 | 1.758352 | 3.0918027  | 21.39888 | 0.138741 | 27.95 |
| 600761 | 2016 | -0.37 | 0.03 | 1.758352 | 3.0918027  | 22.57654 | 0.102028 | 37.97 |
| 600983 | 2016 | 0.128 | 0.03 | 1.758352 | 3.0918027  | 22.91816 | 0.069601 | 51    |
| 2230   | 2016 | 2.334 | 0.03 | 1.758352 | 3.0918027  | 23.06641 | 0.068818 | 13.62 |
| 859    | 2016 | 0.3   | 0.03 | 1.758352 | 3.0918027  | 21.45988 | 0.006043 | 24.6  |
| 521    | 2016 | -0.21 | 0.03 | 1.758352 | 3.0918027  | 23.2496  | 0.042618 | 22.47 |
| 300087 | 2016 | 0.837 | 0.03 | 1.758352 | 3.0918027  | 20.40872 | 0.059895 | 10.93 |
| 603011 | 2016 | -0.53 | 0.03 | 1.758352 | 3.0918027  | 21.42386 | 0.030579 | 33.01 |
| 600551 | 2016 | 0.439 | 0.03 | 1.758352 | 3.0918027  | 22.75795 | 0.077659 | 56.79 |
| 600063 | 2016 | -0.6  | 0.03 | 1.758352 | 3.0918027  | 22.88809 | 0.030249 | 35.97 |
| 600983 | 2016 | 0.128 | 0.03 | 1.758352 | 3.0918027  | 22.91816 | 0.069601 | 51    |
| 600418 | 2016 | -0.31 | 0.03 | 1.758352 | 3.0918027  | 24.61946 | 0.078521 | 23.55 |
| 2331   | 2016 | 1.444 | 0.03 | 1.758352 | 3.0918027  | 21.35464 | 0.062351 | 7.84  |
| 300247 | 2016 | 0.468 | 0.03 | 1.758352 | 3.0918027  | 21.63849 | 0.033268 | 14.44 |
| 600418 | 2016 | 0.047 | 0.03 | 1.758352 | 3.0918027  | 24.61946 | 0.078521 | 23.55 |
| 868    | 2016 | -0.2  | 0.03 | 1.758352 | 3.0918027  | 22.92917 | 0.031806 | 21.13 |
| 600418 | 2016 | 0.047 | 0.03 | 1.758352 | 3.0918027  | 24.61946 | 0.078521 | 23.55 |
| 300009 | 2016 | 1.124 | 0.03 | 1.758352 | 3.0918027  | 21.39888 | 0.138741 | 27.95 |
| 300009 | 2016 | 1.124 | 0.03 | 1.758352 | 3.0918027  | 21.39888 | 0.138741 | 27.95 |
| 300009 | 2016 | 1.124 | 0.03 | 1.758352 | 3.0918027  | 21.39888 | 0.138741 | 27.95 |
| 603308 | 2016 | -0.02 | 0.03 | 1.758352 | 3.0918027  | 22.57868 | 0.018799 | 30.6  |
| 300009 | 2016 | 1.124 | 0.03 | 1.758352 | 3.0918027  | 21.39888 | 0.138741 | 27.95 |
| 2331   | 2016 | 0.882 | 0.03 | 1.758352 | 3.0918027  | 21.35464 | 0.062351 | 7.84  |
| 2331   | 2016 | 1.33  | 0.03 | 1.758352 | 3.0918027  | 21.14888 | 0.062351 | 7.84  |
| 600418 | 2016 | -0.51 | 0.03 | 1.758352 | 3.0918027  | 24.61946 | 0.078521 | 23.55 |
| 600761 | 2016 | -0.2  | 0.03 | 1.758352 | 3.0918027  | 22.57654 | 0.102028 | 37.97 |
| 600761 | 2016 | -0.37 | 0.03 | 1.758352 | 3.0918027  | 22.57654 | 0.102028 | 37.97 |
| 600761 | 2016 | 0.333 | 0.03 | 1.758352 | 3.0918027  | 22.57654 | 0.102028 | 37.97 |
| 300009 | 2016 | 0.568 | 0.03 | 1.758352 | 3.0918027  | 21.39888 | 0.138741 | 27.95 |
| 545    | 2016 | 0.565 | 0.1  | 0.510826 | 0.26094302 | 21.71502 | 0.063479 | 37.3  |
| 600360 | 2016 | 0.336 | 0.1  | 0.510826 | 0.26094302 | 22.02758 | 0.018273 | 23.51 |
| 600360 | 2016 | 0.336 | 0.1  | 0.510826 | 0.26094302 | 22.02758 | 0.018273 | 23.51 |
| 600360 | 2016 | 0.601 | 0.1  | 0.510826 | 0.26094302 | 21.91894 | 0.018273 | 23.51 |
| 600360 | 2016 | 0.336 | 0.1  | 0.510826 | 0.26094302 | 22.02758 | 0.018273 | 23.51 |
| 600360 | 2016 | 0.535 | 0.1  | 0.510826 | 0.26094302 | 22.02758 | 0.018273 | 23.51 |
| 600360 | 2016 | 0.601 | 0.1  | 0.510826 | 0.26094302 | 22.02758 | 0.018273 | 23.51 |
| 545    | 2016 | 0.565 | 0.1  | 0.510826 | 0.26094302 | 21.71502 | 0.063479 | 37.3  |
| 545    | 2016 | 0.565 | 0.1  | 0.510826 | 0.26094302 | 21.46295 | 0.063479 | 37.3  |
| 600809 | 2016 | -0.93 | 0    | 1.090547 | 1.1892917  | 22.72699 | 0.132638 | 69.97 |
| 600809 | 2016 | -0.93 | 0    | 1.090547 | 1.1892917  | 22.72699 | 0.132638 | 69.97 |
| 600809 | 2016 | -0.93 | 0    | 1.090547 | 1.1892917  | 22.53883 | 0.132638 | 69.97 |
| 300355 | 2016 | 0.252 | 0.01 | 0.342945 | 0.11761115 | 22.67248 | 0.120196 | 23.87 |
| 300355 | 2016 | 0.252 | 0.01 | 0.342945 | 0.11761115 | 22.67248 | 0.120196 | 23.87 |
| 600887 | 2016 | 0.015 | 0.01 | 0.342945 | 0.11761115 | 24.39353 | 0.243978 | 9.9   |
| 600201 | 2016 | 0.067 | 0.01 | 0.342945 | 0.11761115 | 22.19291 | 0.171282 | 10.96 |
| 300355 | 2016 | -0.82 | 0.01 | 0.342945 | 0.11761115 | 22.67248 | 0.120196 | 23.87 |
| 2688   | 2016 | 0.157 | 0.01 | 0.342945 | 0.11761115 | 21.70247 | 0.109987 | 38.05 |
| 600887 | 2016 | -0.6  | 0.01 | 0.342945 | 0.11761115 | 24.39353 | 0.243978 | 9.9   |
| 600887 | 2016 | -0.98 | 0.01 | 0.342945 | 0.11761115 | 24.39353 | 0.243978 | 9.9   |
| 300355 | 2016 | -0.04 | 0.01 | 0.342945 | 0.11761115 | 22.42015 | 0.120196 | 23.87 |
| 600201 | 2016 | 0.169 | 0.01 | 0.342945 | 0.11761115 | 22.19291 | 0.171282 | 10.96 |
| 2688   | 2016 | 0.687 | 0.01 | 0.342945 | 0.11761115 | 21.70247 | 0.109987 | 38.05 |

|        |      |       |      |          |            |          |          |       |
|--------|------|-------|------|----------|------------|----------|----------|-------|
| 2688   | 2016 | 0.131 | 0.01 | 0.342945 | 0.11761115 | 21.70247 | 0.109987 | 38.05 |
| 2688   | 2016 | 0.687 | 0.01 | 0.342945 | 0.11761115 | 21.38383 | 0.109987 | 38.05 |
| 2688   | 2016 | 4E-04 | 0.01 | 0.342945 | 0.11761115 | 21.70247 | 0.109987 | 38.05 |
| 2688   | 2016 | -0.2  | 0.01 | 0.342945 | 0.11761115 | 21.70247 | 0.109987 | 38.05 |
| 600887 | 2016 | -0.41 | 0.01 | 0.342945 | 0.11761115 | 24.39353 | 0.243978 | 9.9   |
| 2688   | 2016 | 4E-04 | 0.01 | 0.342945 | 0.11761115 | 21.70247 | 0.109987 | 38.05 |
| 300355 | 2016 | 0.252 | 0.01 | 0.342945 | 0.11761115 | 22.67248 | 0.120196 | 23.87 |
| 600887 | 2016 | -0.61 | 0.01 | 0.342945 | 0.11761115 | 24.16445 | 0.243978 | 9.9   |
| 300355 | 2016 | 0.252 | 0.01 | 0.342945 | 0.11761115 | 22.67248 | 0.120196 | 23.87 |
| 600201 | 2016 | 0.162 | 0.01 | 0.342945 | 0.11761115 | 22.19291 | 0.171282 | 10.96 |
| 300355 | 2016 | 0.252 | 0.01 | 0.342945 | 0.11761115 | 22.67248 | 0.120196 | 23.87 |
| 600887 | 2016 | -0.61 | 0.01 | 0.342945 | 0.11761115 | 24.39353 | 0.243978 | 9.9   |
| 300355 | 2016 | -0.82 | 0.01 | 0.342945 | 0.11761115 | 22.67248 | 0.120196 | 23.87 |
| 600201 | 2016 | 0.162 | 0.01 | 0.342945 | 0.11761115 | 22.06757 | 0.171282 | 10.96 |
| 600853 | 2016 | -0.65 | 0.02 | 0.096004 | 0.00921669 | 22.9704  | 0.033068 | 33.34 |
| 600853 | 2016 | -0.59 | 0.02 | 0.096004 | 0.00921669 | 22.9704  | 0.033068 | 33.34 |
| 711    | 2016 | -0.91 | 0.02 | 0.096004 | 0.00921669 | 22.13072 | 0.006335 | 19.85 |
| 600664 | 2016 | 0.411 | 0.02 | 0.096004 | 0.00921669 | 23.43483 | 0.101685 | 46.17 |
| 600666 | 2016 | -0.09 | 0.02 | 0.096004 | 0.00921669 | 22.64193 | 0.13312  | 19    |
| 711    | 2016 | -0.25 | 0.02 | 0.096004 | 0.00921669 | 22.13072 | 0.006335 | 19.85 |
| 2737   | 2016 | 0.564 | 0.02 | 0.096004 | 0.00921669 | 22.16396 | 0.120966 | 41.62 |
| 300040 | 2016 | 0.121 | 0.02 | 0.096004 | 0.00921669 | 21.76444 | 0.073144 | 19.74 |
| 600178 | 2016 | -0.52 | 0.02 | 0.096004 | 0.00921669 | 22.19614 | 0.04291  | 51.42 |
| 600289 | 2016 | 1.697 | 0.02 | 0.096004 | 0.00921669 | 22.1453  | 0.040155 | 32.89 |
| 600289 | 2016 | 1.697 | 0.02 | 0.096004 | 0.00921669 | 22.1453  | 0.040155 | 32.89 |
| 901    | 2016 | 0.647 | 0.02 | 0.096004 | 0.00921669 | 22.02011 | 0.041799 | 16.88 |
| 2437   | 2016 | 0.633 | 0.02 | 0.096004 | 0.00921669 | 22.88274 | 0.180001 | 42.63 |
| 600853 | 2016 | -0.65 | 0.02 | 0.096004 | 0.00921669 | 22.9704  | 0.033068 | 33.34 |
| 600726 | 2016 | -0.46 | 0.02 | 0.096004 | 0.00921669 | 23.71513 | 0.042019 | 44.8  |
| 711    | 2016 | -0.58 | 0.02 | 0.096004 | 0.00921669 | 22.13072 | 0.006335 | 19.85 |
| 2698   | 2016 | -0.37 | 0.02 | 0.096004 | 0.00921669 | 21.53532 | 0.056553 | 24.11 |
| 600598 | 2016 | -0.96 | 0.02 | 0.096004 | 0.00921669 | 22.76996 | 0.12482  | 64.14 |
| 600701 | 2016 | 0.52  | 0.02 | 0.096004 | 0.00921669 | 22.71645 | -0.01616 | 16.42 |
| 600853 | 2016 | -0.86 | 0.02 | 0.096004 | 0.00921669 | 22.9704  | 0.033068 | 33.34 |
| 600853 | 2016 | -0.76 | 0.02 | 0.096004 | 0.00921669 | 22.9704  | 0.033068 | 33.34 |
| 600289 | 2016 | 1.697 | 0.02 | 0.096004 | 0.00921669 | 22.1453  | 0.040155 | 32.89 |
| 901    | 2016 | 0.197 | 0.02 | 0.096004 | 0.00921669 | 22.46895 | 0.041799 | 16.88 |
| 600726 | 2016 | -0.54 | 0.02 | 0.096004 | 0.00921669 | 23.96014 | 0.042019 | 44.8  |
| 2437   | 2016 | 0.633 | 0.02 | 0.096004 | 0.00921669 | 22.88274 | 0.180001 | 42.63 |
| 901    | 2016 | -0.41 | 0.02 | 0.096004 | 0.00921669 | 22.46895 | 0.041799 | 16.88 |
| 901    | 2016 | 0.197 | 0.02 | 0.096004 | 0.00921669 | 22.46895 | 0.041799 | 16.88 |
| 600038 | 2016 | 0.291 | 0.02 | 0.096004 | 0.00921669 | 23.71025 | 0.062141 | 28.21 |
| 711    | 2016 | -0.58 | 0.02 | 0.096004 | 0.00921669 | 22.13072 | 0.006335 | 19.85 |
| 2737   | 2016 | -0.76 | 0.02 | 0.096004 | 0.00921669 | 22.16396 | 0.120966 | 41.62 |
| 2698   | 2016 | 0.209 | 0.02 | 0.096004 | 0.00921669 | 21.53532 | 0.056553 | 24.11 |
| 600726 | 2016 | -0.46 | 0.02 | 0.096004 | 0.00921669 | 23.96014 | 0.042019 | 44.8  |
| 600726 | 2016 | -0.46 | 0.02 | 0.096004 | 0.00921669 | 23.96014 | 0.042019 | 44.8  |
| 300040 | 2016 | -0.41 | 0.02 | 0.096004 | 0.00921669 | 21.76444 | 0.073144 | 19.74 |
| 600038 | 2016 | 0.264 | 0.02 | 0.096004 | 0.00921669 | 22.50911 | 0.062141 | 28.21 |
| 600853 | 2016 | -0.86 | 0.02 | 0.096004 | 0.00921669 | 22.9704  | 0.033068 | 33.34 |
| 603023 | 2016 | -0.02 | 0.02 | 0.096004 | 0.00921669 | 20.18337 | 0.171191 | 45.22 |
| 600666 | 2016 | -0.46 | 0.02 | 0.096004 | 0.00921669 | 22.64193 | 0.13312  | 19    |
| 603023 | 2016 | -0.02 | 0.02 | 0.096004 | 0.00921669 | 20.18337 | 0.171191 | 45.22 |
| 600726 | 2016 | -0.46 | 0.02 | 0.096004 | 0.00921669 | 23.96014 | 0.042019 | 44.8  |

|        |      |       |      |          |            |          |          |       |
|--------|------|-------|------|----------|------------|----------|----------|-------|
| 711    | 2016 | -0.91 | 0.02 | 0.096004 | 0.00921669 | 21.80956 | 0.006335 | 19.85 |
| 600664 | 2016 | 0.411 | 0.02 | 0.096004 | 0.00921669 | 23.43483 | 0.101685 | 46.17 |
| 2698   | 2016 | 0.338 | 0.02 | 0.096004 | 0.00921669 | 21.53532 | 0.056553 | 24.11 |
| 2698   | 2016 | 0.092 | 0.02 | 0.096004 | 0.00921669 | 21.53532 | 0.056553 | 24.11 |
| 600664 | 2016 | 0.411 | 0.02 | 0.096004 | 0.00921669 | 23.43483 | 0.101685 | 46.17 |
| 300489 | 2016 | -0.62 | 0.02 | 0.096004 | 0.00921669 | 20.25584 | 0.068564 | 27.33 |
| 600811 | 2016 | 0.408 | 0.02 | 0.096004 | 0.00921669 | 24.12094 | 0.036499 | 16.39 |
| 300489 | 2016 | -0.62 | 0.02 | 0.096004 | 0.00921669 | 20.19274 | 0.068564 | 27.33 |
| 600666 | 2016 | -0.46 | 0.02 | 0.096004 | 0.00921669 | 22.31024 | 0.13312  | 19    |
| 600726 | 2016 | -0.46 | 0.02 | 0.096004 | 0.00921669 | 23.96014 | 0.042019 | 44.8  |
| 2737   | 2016 | -0.76 | 0.02 | 0.096004 | 0.00921669 | 21.59341 | 0.120966 | 41.62 |
| 600202 | 2016 | 0.085 | 0.02 | 0.096004 | 0.00921669 | 21.37289 | -0.2652  | 34.03 |
| 600289 | 2016 | 1.697 | 0.02 | 0.096004 | 0.00921669 | 22.1453  | 0.040155 | 32.89 |
| 600664 | 2016 | 0.411 | 0.02 | 0.096004 | 0.00921669 | 23.15101 | 0.101685 | 46.17 |
| 603023 | 2016 | -0.02 | 0.02 | 0.096004 | 0.00921669 | 20.18337 | 0.171191 | 45.22 |
| 901    | 2016 | -0.41 | 0.02 | 0.096004 | 0.00921669 | 22.46895 | 0.041799 | 16.88 |
| 2737   | 2016 | -0.76 | 0.02 | 0.096004 | 0.00921669 | 22.16396 | 0.120966 | 41.62 |
| 2437   | 2016 | 0.633 | 0.02 | 0.096004 | 0.00921669 | 22.88274 | 0.180001 | 42.63 |
| 2698   | 2016 | -0.37 | 0.02 | 0.096004 | 0.00921669 | 21.48729 | 0.056553 | 24.11 |
| 600853 | 2016 | -0.65 | 0.02 | 0.096004 | 0.00921669 | 22.9704  | 0.033068 | 33.34 |
| 600598 | 2016 | -0.96 | 0.02 | 0.096004 | 0.00921669 | 22.76996 | 0.12482  | 64.14 |
| 2737   | 2016 | 0.564 | 0.02 | 0.096004 | 0.00921669 | 22.16396 | 0.120966 | 41.62 |
| 600289 | 2016 | 1.697 | 0.02 | 0.096004 | 0.00921669 | 22.1453  | 0.040155 | 32.89 |
| 600666 | 2016 | 0.005 | 0.02 | 0.096004 | 0.00921669 | 22.64193 | 0.13312  | 19    |
| 600178 | 2016 | -0.52 | 0.02 | 0.096004 | 0.00921669 | 22.19614 | 0.04291  | 51.42 |
| 300040 | 2016 | -0.41 | 0.02 | 0.096004 | 0.00921669 | 21.76444 | 0.073144 | 19.74 |
| 600202 | 2016 | 0.085 | 0.02 | 0.096004 | 0.00921669 | 21.37289 | -0.2652  | 34.03 |
| 901    | 2016 | 0.755 | 0.02 | 0.096004 | 0.00921669 | 22.46895 | 0.041799 | 16.88 |
| 2437   | 2016 | 0.633 | 0.02 | 0.096004 | 0.00921669 | 22.88274 | 0.180001 | 42.63 |
| 2437   | 2016 | 0.633 | 0.02 | 0.096004 | 0.00921669 | 22.88274 | 0.180001 | 42.63 |
| 300040 | 2016 | 0.121 | 0.02 | 0.096004 | 0.00921669 | 21.67434 | 0.073144 | 19.74 |
| 600038 | 2016 | 0.27  | 0.02 | 0.096004 | 0.00921669 | 22.50911 | 0.062141 | 28.21 |
| 600598 | 2016 | -0.96 | 0.02 | 0.096004 | 0.00921669 | 22.77172 | 0.12482  | 64.14 |
| 600666 | 2016 | -0.15 | 0.02 | 0.096004 | 0.00921669 | 22.64193 | 0.13312  | 19    |
| 600811 | 2016 | 0.297 | 0.02 | 0.096004 | 0.00921669 | 24.5865  | 0.036499 | 16.39 |
| 600202 | 2016 | -0.25 | 0.02 | 0.096004 | 0.00921669 | 21.37289 | -0.2652  | 34.03 |
| 600666 | 2016 | -0.46 | 0.02 | 0.096004 | 0.00921669 | 22.64193 | 0.13312  | 19    |
| 2437   | 2016 | -0.69 | 0.02 | 0.096004 | 0.00921669 | 22.88274 | 0.180001 | 42.63 |
| 600811 | 2016 | -0.25 | 0.02 | 0.096004 | 0.00921669 | 24.5865  | 0.036499 | 16.39 |
| 600666 | 2016 | -0.46 | 0.02 | 0.096004 | 0.00921669 | 22.64193 | 0.13312  | 19    |
| 600289 | 2016 | 1.697 | 0.02 | 0.096004 | 0.00921669 | 22.1453  | 0.040155 | 32.89 |
| 2737   | 2016 | -0.56 | 0.02 | 0.096004 | 0.00921669 | 22.16396 | 0.120966 | 41.62 |
| 600811 | 2016 | 0.293 | 0.02 | 0.096004 | 0.00921669 | 24.5865  | 0.036499 | 16.39 |
| 2737   | 2016 | 0.564 | 0.02 | 0.096004 | 0.00921669 | 22.16396 | 0.120966 | 41.62 |
| 600178 | 2016 | -0.62 | 0.02 | 0.096004 | 0.00921669 | 22.19614 | 0.04291  | 51.42 |
| 2698   | 2016 | 0.092 | 0.02 | 0.096004 | 0.00921669 | 21.53532 | 0.056553 | 24.11 |
| 600811 | 2016 | -0.25 | 0.02 | 0.096004 | 0.00921669 | 24.5865  | 0.036499 | 16.39 |
| 600726 | 2016 | -0.46 | 0.02 | 0.096004 | 0.00921669 | 23.96014 | 0.042019 | 44.8  |
| 600666 | 2016 | -0.15 | 0.02 | 0.096004 | 0.00921669 | 22.64193 | 0.13312  | 19    |
| 600178 | 2016 | -0.52 | 0.02 | 0.096004 | 0.00921669 | 22.19614 | 0.04291  | 51.42 |
| 901    | 2016 | 0.645 | 0.02 | 0.096004 | 0.00921669 | 22.46895 | 0.041799 | 16.88 |
| 901    | 2016 | 0.42  | 0.02 | 0.096004 | 0.00921669 | 22.46895 | 0.041799 | 16.88 |
| 600178 | 2016 | -0.62 | 0.02 | 0.096004 | 0.00921669 | 22.19614 | 0.04291  | 51.42 |
| 600701 | 2016 | 0.52  | 0.02 | 0.096004 | 0.00921669 | 22.27153 | -0.01616 | 16.42 |

|        |      |       |      |          |            |          |          |       |
|--------|------|-------|------|----------|------------|----------|----------|-------|
| 2737   | 2016 | -0.76 | 0.02 | 0.096004 | 0.00921669 | 22.16396 | 0.120966 | 41.62 |
| 2698   | 2016 | -0.37 | 0.02 | 0.096004 | 0.00921669 | 21.53532 | 0.056553 | 24.11 |
| 2437   | 2016 | 0.633 | 0.02 | 0.096004 | 0.00921669 | 22.80404 | 0.180001 | 42.63 |
| 600853 | 2016 | -0.86 | 0.02 | 0.096004 | 0.00921669 | 22.9704  | 0.033068 | 33.34 |
| 600178 | 2016 | -0.56 | 0.02 | 0.096004 | 0.00921669 | 22.19614 | 0.04291  | 51.42 |
| 600202 | 2016 | -0.25 | 0.02 | 0.096004 | 0.00921669 | 21.37289 | -0.2652  | 34.03 |
| 2437   | 2016 | 0.633 | 0.02 | 0.096004 | 0.00921669 | 22.88274 | 0.180001 | 42.63 |
| 300489 | 2016 | -0.62 | 0.02 | 0.096004 | 0.00921669 | 20.25584 | 0.068564 | 27.33 |
| 2698   | 2016 | 0.292 | 0.02 | 0.096004 | 0.00921669 | 21.53532 | 0.056553 | 24.11 |
| 901    | 2016 | 0.755 | 0.02 | 0.096004 | 0.00921669 | 22.46895 | 0.041799 | 16.88 |
| 600664 | 2016 | 0.411 | 0.02 | 0.096004 | 0.00921669 | 23.43483 | 0.101685 | 46.17 |
| 600853 | 2016 | -0.69 | 0.02 | 0.096004 | 0.00921669 | 22.9704  | 0.033068 | 33.34 |
| 600289 | 2016 | 1.697 | 0.02 | 0.096004 | 0.00921669 | 22.28804 | 0.040155 | 32.89 |
| 600726 | 2016 | -0.46 | 0.02 | 0.096004 | 0.00921669 | 23.96014 | 0.042019 | 44.8  |
| 600853 | 2016 | -0.86 | 0.02 | 0.096004 | 0.00921669 | 22.9704  | 0.033068 | 33.34 |
| 600666 | 2016 | -0.46 | 0.02 | 0.096004 | 0.00921669 | 22.64193 | 0.13312  | 19    |
| 300040 | 2016 | -0.03 | 0.02 | 0.096004 | 0.00921669 | 21.76444 | 0.073144 | 19.74 |
| 300040 | 2016 | 0.121 | 0.02 | 0.096004 | 0.00921669 | 21.76444 | 0.073144 | 19.74 |
| 600701 | 2016 | 0.52  | 0.02 | 0.096004 | 0.00921669 | 22.71645 | -0.01616 | 16.42 |
| 600853 | 2016 | -0.2  | 0.02 | 0.096004 | 0.00921669 | 22.48134 | 0.033068 | 33.34 |
| 600701 | 2016 | 0.52  | 0.02 | 0.096004 | 0.00921669 | 22.71645 | -0.01616 | 16.42 |
| 901    | 2016 | -0.41 | 0.02 | 0.096004 | 0.00921669 | 22.46895 | 0.041799 | 16.88 |
| 600726 | 2016 | -0.48 | 0.02 | 0.096004 | 0.00921669 | 23.96014 | 0.042019 | 44.8  |
| 600038 | 2016 | 0.264 | 0.02 | 0.096004 | 0.00921669 | 23.71025 | 0.062141 | 28.21 |
| 600202 | 2016 | -0.03 | 0.02 | 0.096004 | 0.00921669 | 21.3801  | -0.2652  | 34.03 |
| 2437   | 2016 | 0.633 | 0.02 | 0.096004 | 0.00921669 | 22.88274 | 0.180001 | 42.63 |
| 2698   | 2016 | -0.37 | 0.02 | 0.096004 | 0.00921669 | 21.53532 | 0.056553 | 24.11 |
| 711    | 2016 | -0.69 | 0.02 | 0.096004 | 0.00921669 | 22.13072 | 0.006335 | 19.85 |
| 2737   | 2016 | -0.76 | 0.02 | 0.096004 | 0.00921669 | 22.16396 | 0.120966 | 41.62 |
| 600038 | 2016 | -0.14 | 0.02 | 0.096004 | 0.00921669 | 23.71025 | 0.062141 | 28.21 |
| 2437   | 2016 | 0.399 | 0.02 | 0.096004 | 0.00921669 | 22.88274 | 0.180001 | 42.63 |
| 600811 | 2016 | 0.255 | 0.02 | 0.096004 | 0.00921669 | 24.5865  | 0.036499 | 16.39 |
| 600664 | 2016 | 0.411 | 0.02 | 0.096004 | 0.00921669 | 23.43483 | 0.101685 | 46.17 |
| 2437   | 2016 | 0.385 | 0.02 | 0.096004 | 0.00921669 | 22.88274 | 0.180001 | 42.63 |
| 2437   | 2016 | 0.633 | 0.02 | 0.096004 | 0.00921669 | 22.88274 | 0.180001 | 42.63 |
| 2698   | 2016 | 0.155 | 0.02 | 0.096004 | 0.00921669 | 21.53532 | 0.056553 | 24.11 |
| 2437   | 2016 | 0.633 | 0.02 | 0.096004 | 0.00921669 | 22.88274 | 0.180001 | 42.63 |
| 600853 | 2016 | -0.67 | 0.02 | 0.096004 | 0.00921669 | 22.9704  | 0.033068 | 33.34 |
| 711    | 2016 | -0.65 | 0.02 | 0.096004 | 0.00921669 | 22.13072 | 0.006335 | 19.85 |
| 600726 | 2016 | -0.54 | 0.02 | 0.096004 | 0.00921669 | 23.96014 | 0.042019 | 44.8  |
| 600664 | 2016 | 0.411 | 0.02 | 0.096004 | 0.00921669 | 23.43483 | 0.101685 | 46.17 |
| 2737   | 2016 | 0.564 | 0.02 | 0.096004 | 0.00921669 | 22.16396 | 0.120966 | 41.62 |
| 901    | 2016 | 0.917 | 0.02 | 0.096004 | 0.00921669 | 22.46895 | 0.041799 | 16.88 |
| 600853 | 2016 | -0.86 | 0.02 | 0.096004 | 0.00921669 | 22.9704  | 0.033068 | 33.34 |
| 2737   | 2016 | -0.76 | 0.02 | 0.096004 | 0.00921669 | 22.16396 | 0.120966 | 41.62 |
| 600726 | 2016 | -0.99 | 0.02 | 0.096004 | 0.00921669 | 23.96014 | 0.042019 | 44.8  |
| 2737   | 2016 | -0.56 | 0.02 | 0.096004 | 0.00921669 | 22.16396 | 0.120966 | 41.62 |
| 600726 | 2016 | -0.49 | 0.02 | 0.096004 | 0.00921669 | 23.96014 | 0.042019 | 44.8  |
| 856    | 2016 | -0.88 | 0    | 0.967343 | 0.93575193 | 21.22227 | 0.065953 | 30    |
| 600409 | 2016 | 0.204 | 0    | 0.967343 | 0.93575193 | 23.08227 | 0.107413 | 39.98 |
| 2049   | 2016 | 2.139 | 0    | 0.967343 | 0.93575193 | 22.2199  | 0.101611 | 36.39 |
| 2049   | 2016 | 1.093 | 0    | 0.967343 | 0.93575193 | 22.2199  | 0.101611 | 36.39 |
| 2049   | 2016 | 1.847 | 0    | 0.967343 | 0.93575193 | 22.2199  | 0.101611 | 36.39 |
| 2049   | 2016 | 1.093 | 0    | 0.967343 | 0.93575193 | 22.2199  | 0.101611 | 36.39 |

|        |      |       |      |          |            |          |          |       |
|--------|------|-------|------|----------|------------|----------|----------|-------|
| 600409 | 2016 | -0.29 | 0    | 0.967343 | 0.93575193 | 23.76783 | 0.107413 | 39.98 |
| 600997 | 2016 | -0.31 | 0    | 0.967343 | 0.93575193 | 23.73579 | 0.064445 | 56.74 |
| 600997 | 2016 | -0.31 | 0    | 0.967343 | 0.93575193 | 23.18777 | 0.064445 | 56.74 |
| 2049   | 2016 | 1.706 | 0    | 0.967343 | 0.93575193 | 22.2199  | 0.101611 | 36.39 |
| 600409 | 2016 | -0.28 | 0    | 0.967343 | 0.93575193 | 23.76783 | 0.107413 | 39.98 |
| 401    | 2016 | -0.99 | 0    | 0.967343 | 0.93575193 | 24.33051 | -0.00212 | 30    |
| 600409 | 2016 | -0.57 | 0    | 0.967343 | 0.93575193 | 23.76783 | 0.107413 | 39.98 |
| 300371 | 2016 | 0.002 | 0    | 0.967343 | 0.93575193 | 20.21661 | 0.09666  | 37.88 |
| 600997 | 2016 | -0.97 | 0    | 0.967343 | 0.93575193 | 23.73579 | 0.064445 | 56.74 |
| 2049   | 2016 | 1.093 | 0    | 0.967343 | 0.93575193 | 22.2199  | 0.101611 | 36.39 |
| 300371 | 2016 | 0.002 | 0    | 0.967343 | 0.93575193 | 20.21661 | 0.09666  | 37.88 |
| 856    | 2016 | -0.88 | 0    | 0.967343 | 0.93575193 | 21.22227 | 0.065953 | 30    |
| 300371 | 2016 | 0.002 | 0    | 0.967343 | 0.93575193 | 20.21661 | 0.09666  | 37.88 |
| 401    | 2016 | -0.99 | 0    | 0.967343 | 0.93575193 | 24.44848 | -0.00212 | 30    |
| 401    | 2016 | -0.99 | 0    | 0.967343 | 0.93575193 | 24.44848 | -0.00212 | 30    |
| 401    | 2016 | -0.99 | 0    | 0.967343 | 0.93575193 | 24.44848 | -0.00212 | 30    |
| 401    | 2016 | -0.99 | 0    | 0.967343 | 0.93575193 | 24.44848 | -0.00212 | 30    |
| 600997 | 2016 | -0.97 | 0    | 0.967343 | 0.93575193 | 23.73579 | 0.064445 | 56.74 |
| 2049   | 2016 | 1.49  | 0    | 0.967343 | 0.93575193 | 22.2199  | 0.101611 | 36.39 |
| 600409 | 2016 | -0.57 | 0    | 0.967343 | 0.93575193 | 23.76783 | 0.107413 | 39.98 |
| 2049   | 2016 | 1.093 | 0    | 0.967343 | 0.93575193 | 22.2199  | 0.101611 | 36.39 |
| 600409 | 2016 | -0.78 | 0    | 0.967343 | 0.93575193 | 23.76783 | 0.107413 | 39.98 |
| 856    | 2016 | -0.88 | 0    | 0.967343 | 0.93575193 | 21.22227 | 0.065953 | 30    |
| 600997 | 2016 | -0.17 | 0    | 0.967343 | 0.93575193 | 23.73579 | 0.064445 | 56.74 |
| 856    | 2016 | -0.88 | 0    | 0.967343 | 0.93575193 | 21.22227 | 0.065953 | 30    |
| 600409 | 2016 | -0.28 | 0    | 0.967343 | 0.93575193 | 23.76783 | 0.107413 | 39.98 |
| 2049   | 2016 | 1.28  | 0    | 0.967343 | 0.93575193 | 21.65559 | 0.101611 | 36.39 |
| 856    | 2016 | -0.88 | 0    | 0.967343 | 0.93575193 | 21.22227 | 0.065953 | 30    |
| 300371 | 2016 | 0.002 | 0    | 0.967343 | 0.93575193 | 20.21661 | 0.09666  | 37.88 |
| 600409 | 2016 | -0.35 | 0    | 0.967343 | 0.93575193 | 23.76783 | 0.107413 | 39.98 |
| 856    | 2016 | -0.88 | 0    | 0.967343 | 0.93575193 | 20.31741 | 0.065953 | 30    |
| 600409 | 2016 | -0.31 | 0    | 0.967343 | 0.93575193 | 23.76783 | 0.107413 | 39.98 |
| 2049   | 2016 | 1.944 | 0    | 0.967343 | 0.93575193 | 22.2199  | 0.101611 | 36.39 |
| 600997 | 2016 | -0.09 | 0    | 0.967343 | 0.93575193 | 23.73579 | 0.064445 | 56.74 |
| 2049   | 2016 | 1.853 | 0    | 0.967343 | 0.93575193 | 22.2199  | 0.101611 | 36.39 |
| 2049   | 2016 | 2.389 | 0    | 0.967343 | 0.93575193 | 22.2199  | 0.101611 | 36.39 |
| 2049   | 2016 | 1.093 | 0    | 0.967343 | 0.93575193 | 22.2199  | 0.101611 | 36.39 |
| 2049   | 2016 | 1.093 | 0    | 0.967343 | 0.93575193 | 22.2199  | 0.101611 | 36.39 |
| 600997 | 2016 | -0.17 | 0    | 0.967343 | 0.93575193 | 23.73579 | 0.064445 | 56.74 |
| 600409 | 2016 | -0.62 | 0    | 0.967343 | 0.93575193 | 23.76783 | 0.107413 | 39.98 |
| 933    | 2016 | -0.95 | 0.03 | 1.796089 | 3.2259342  | 24.66991 | -0.13389 | 24.21 |
| 933    | 2016 | -0.95 | 0.03 | 1.796089 | 3.2259342  | 24.66991 | -0.13389 | 24.21 |
| 933    | 2016 | -0.95 | 0.03 | 1.796089 | 3.2259342  | 24.66991 | -0.13389 | 24.21 |
| 933    | 2016 | -0.95 | 0.03 | 1.796089 | 3.2259342  | 24.66991 | -0.13389 | 24.21 |
| 933    | 2016 | -0.95 | 0.03 | 1.796089 | 3.2259342  | 24.66991 | -0.13389 | 24.21 |
| 933    | 2016 | -0.95 | 0.03 | 1.796089 | 3.2259342  | 24.22151 | -0.13389 | 24.21 |
| 600330 | 2016 | 0.175 | 0.04 | 0.693147 | 0.48045301 | 22.28511 | 0.031265 | 13    |
| 2381   | 2016 | -0.17 | 0.04 | 0.693147 | 0.48045301 | 21.60963 | 0.018398 | 20.1  |
| 600273 | 2016 | 0.298 | 0.04 | 0.693147 | 0.48045301 | 22.64134 | 0.186678 | 44.04 |
| 600330 | 2016 | -0.05 | 0.04 | 0.693147 | 0.48045301 | 22.28511 | 0.031265 | 13    |
| 600796 | 2016 | -0.53 | 0.04 | 0.693147 | 0.48045301 | 20.75139 | 0.063345 | 33.3  |
| 2404   | 2016 | -0.75 | 0.04 | 0.693147 | 0.48045301 | 21.54887 | 0.077599 | 21.83 |
| 603889 | 2016 | 0.577 | 0.04 | 0.693147 | 0.48045301 | 21.23082 | 0.135929 | 37.64 |
| 2188   | 2016 | 0.122 | 0.04 | 0.693147 | 0.48045301 | 21.40063 | 0.044642 | 20.03 |



|        |      |       |      |          |            |          |          |       |
|--------|------|-------|------|----------|------------|----------|----------|-------|
| 600176 | 2016 | -0.32 | 0.04 | 0.693147 | 0.48045301 | 23.89849 | 0.138372 | 26.97 |
| 2562   | 2016 | 0.804 | 0.04 | 0.693147 | 0.48045301 | 21.59123 | 0.108296 | 25.78 |
| 300461 | 2016 | -0.16 | 0.04 | 0.693147 | 0.48045301 | 20.35881 | 0.068972 | 21.32 |
| 2404   | 2016 | -0.54 | 0.04 | 0.693147 | 0.48045301 | 21.54887 | 0.077599 | 21.83 |
| 2522   | 2016 | -0.46 | 0.04 | 0.693147 | 0.48045301 | 21.45814 | 0.059124 | 45.07 |
| 2188   | 2016 | 0.329 | 0.04 | 0.693147 | 0.48045301 | 21.40063 | 0.044642 | 20.03 |
| 601233 | 2016 | -0.58 | 0.04 | 0.693147 | 0.48045301 | 23.66773 | 0.103707 | 31.6  |
| 601233 | 2016 | -0.91 | 0.04 | 0.693147 | 0.48045301 | 23.66773 | 0.103707 | 31.6  |
| 2188   | 2016 | -0.14 | 0.04 | 0.693147 | 0.48045301 | 21.40063 | 0.044642 | 20.03 |
| 300488 | 2016 | 0.272 | 0.04 | 0.693147 | 0.48045301 | 20.36757 | 0.113214 | 51    |
| 2522   | 2016 | 0.015 | 0.04 | 0.693147 | 0.48045301 | 21.45814 | 0.059124 | 45.07 |
| 2522   | 2016 | 0.678 | 0.04 | 0.693147 | 0.48045301 | 21.45814 | 0.059124 | 45.07 |
| 2718   | 2016 | -0.52 | 0.04 | 0.693147 | 0.48045301 | 20.87003 | 0.121224 | 35.32 |
| 601233 | 2016 | -0.91 | 0.04 | 0.693147 | 0.48045301 | 23.66773 | 0.103707 | 31.6  |
| 2648   | 2016 | -0.04 | 0.04 | 0.693147 | 0.48045301 | 22.732   | 0.090638 | 49.66 |
| 2677   | 2016 | -0.13 | 0.04 | 0.693147 | 0.48045301 | 20.96395 | 0.176061 | 24.09 |
| 600330 | 2016 | -0.49 | 0.04 | 0.693147 | 0.48045301 | 22.28511 | 0.031265 | 13    |
| 600176 | 2016 | -0.58 | 0.04 | 0.693147 | 0.48045301 | 23.89849 | 0.138372 | 26.97 |
| 2677   | 2016 | -0.18 | 0.04 | 0.693147 | 0.48045301 | 21.05804 | 0.176061 | 24.09 |
| 2404   | 2016 | -0.75 | 0.04 | 0.693147 | 0.48045301 | 21.54887 | 0.077599 | 21.83 |
| 300461 | 2016 | -0.38 | 0.04 | 0.693147 | 0.48045301 | 20.35881 | 0.068972 | 21.32 |
| 2648   | 2016 | 0.089 | 0.04 | 0.693147 | 0.48045301 | 22.732   | 0.090638 | 49.66 |
| 2677   | 2016 | -0.34 | 0.04 | 0.693147 | 0.48045301 | 21.05804 | 0.176061 | 24.09 |
| 601233 | 2016 | -0.58 | 0.04 | 0.693147 | 0.48045301 | 23.66773 | 0.103707 | 31.6  |
| 600176 | 2016 | 0.456 | 0.04 | 0.693147 | 0.48045301 | 23.89849 | 0.138372 | 26.97 |
| 600330 | 2016 | -0.34 | 0.04 | 0.693147 | 0.48045301 | 22.28511 | 0.031265 | 13    |
| 300488 | 2016 | 0.272 | 0.04 | 0.693147 | 0.48045301 | 20.36757 | 0.113214 | 51    |
| 600330 | 2016 | -0.19 | 0.04 | 0.693147 | 0.48045301 | 22.28511 | 0.031265 | 13    |
| 603799 | 2016 | 0.113 | 0.04 | 0.693147 | 0.48045301 | 23.08462 | 0.013289 | 26.16 |
| 2562   | 2016 | 0.804 | 0.04 | 0.693147 | 0.48045301 | 21.41187 | 0.108296 | 25.78 |
| 601002 | 2016 | -0.19 | 0.04 | 0.693147 | 0.48045301 | 22.16854 | 0.032361 | 41.35 |
| 2677   | 2016 | -0.34 | 0.04 | 0.693147 | 0.48045301 | 21.05804 | 0.176061 | 24.09 |
| 601002 | 2016 | -0.41 | 0.04 | 0.693147 | 0.48045301 | 22.16854 | 0.032361 | 41.35 |
| 2144   | 2016 | -0.26 | 0.04 | 0.693147 | 0.48045301 | 21.4434  | 0.059147 | 21.36 |
| 2648   | 2016 | -0.04 | 0.04 | 0.693147 | 0.48045301 | 22.27587 | 0.090638 | 49.66 |
| 2648   | 2016 | -0.04 | 0.04 | 0.693147 | 0.48045301 | 22.732   | 0.090638 | 49.66 |
| 2562   | 2016 | 0.804 | 0.04 | 0.693147 | 0.48045301 | 21.59123 | 0.108296 | 25.78 |
| 601233 | 2016 | 0.415 | 0.04 | 0.693147 | 0.48045301 | 23.66773 | 0.103707 | 31.6  |
| 600796 | 2016 | -0.42 | 0.04 | 0.693147 | 0.48045301 | 20.67703 | 0.063345 | 33.3  |
| 600176 | 2016 | -0.67 | 0.04 | 0.693147 | 0.48045301 | 23.89849 | 0.138372 | 26.97 |
| 2067   | 2016 | -0.3  | 0.04 | 0.693147 | 0.48045301 | 22.46206 | 0.093928 | 16.29 |
| 600330 | 2016 | 0.175 | 0.04 | 0.693147 | 0.48045301 | 22.14897 | 0.031265 | 13    |
| 601233 | 2016 | -0.58 | 0.04 | 0.693147 | 0.48045301 | 23.66773 | 0.103707 | 31.6  |
| 2144   | 2016 | -0.32 | 0.04 | 0.693147 | 0.48045301 | 21.4434  | 0.059147 | 21.36 |
| 603799 | 2016 | 0.113 | 0.04 | 0.693147 | 0.48045301 | 23.08462 | 0.013289 | 26.16 |
| 601002 | 2016 | -0.43 | 0.04 | 0.693147 | 0.48045301 | 22.16854 | 0.032361 | 41.35 |
| 2677   | 2016 | -0.13 | 0.04 | 0.693147 | 0.48045301 | 21.05804 | 0.176061 | 24.09 |
| 603799 | 2016 | -0.23 | 0.04 | 0.693147 | 0.48045301 | 22.55692 | 0.013289 | 26.16 |
| 2144   | 2016 | -0.32 | 0.04 | 0.693147 | 0.48045301 | 21.4434  | 0.059147 | 21.36 |
| 600176 | 2016 | 0.202 | 0.04 | 0.693147 | 0.48045301 | 23.89849 | 0.138372 | 26.97 |
| 601233 | 2016 | -0.58 | 0.04 | 0.693147 | 0.48045301 | 23.66773 | 0.103707 | 31.6  |
| 603799 | 2016 | 0.182 | 0.04 | 0.693147 | 0.48045301 | 23.08462 | 0.013289 | 26.16 |
| 2522   | 2016 | 0.678 | 0.04 | 0.693147 | 0.48045301 | 21.22029 | 0.059124 | 45.07 |
| 600208 | 2016 | 0.347 | 0.04 | 0.693147 | 0.48045301 | 25.43793 | 0.195569 | 32.41 |

|        |      |       |      |          |            |          |          |       |
|--------|------|-------|------|----------|------------|----------|----------|-------|
| 600273 | 2016 | 0.298 | 0.04 | 0.693147 | 0.48045301 | 22.5667  | 0.186678 | 44.04 |
| 600235 | 2016 | -0.55 | 0.04 | 0.693147 | 0.48045301 | 21.54769 | 0.007875 | 34.3  |
| 2404   | 2016 | -0.18 | 0.04 | 0.693147 | 0.48045301 | 21.54887 | 0.077599 | 21.83 |
| 600796 | 2016 | -0.53 | 0.04 | 0.693147 | 0.48045301 | 20.75139 | 0.063345 | 33.3  |
| 600176 | 2016 | 0.298 | 0.04 | 0.693147 | 0.48045301 | 23.89849 | 0.138372 | 26.97 |
| 601233 | 2016 | -0.47 | 0.04 | 0.693147 | 0.48045301 | 23.37812 | 0.103707 | 31.6  |
| 2718   | 2016 | -0.52 | 0.04 | 0.693147 | 0.48045301 | 20.87003 | 0.121224 | 35.32 |
| 2404   | 2016 | -0.4  | 0.04 | 0.693147 | 0.48045301 | 21.46233 | 0.077599 | 21.83 |
| 300461 | 2016 | -0.06 | 0.04 | 0.693147 | 0.48045301 | 20.66634 | 0.068972 | 21.32 |
| 600330 | 2016 | 0.049 | 0.04 | 0.693147 | 0.48045301 | 22.28511 | 0.031265 | 13    |
| 2648   | 2016 | -0.04 | 0.04 | 0.693147 | 0.48045301 | 22.732   | 0.090638 | 49.66 |
| 2206   | 2016 | -0.35 | 0.04 | 0.693147 | 0.48045301 | 22.15748 | 0.091814 | 23.34 |
| 603889 | 2016 | -0.57 | 0.04 | 0.693147 | 0.48045301 | 21.23082 | 0.135929 | 37.64 |
| 600330 | 2016 | 0.837 | 0.04 | 0.693147 | 0.48045301 | 22.28511 | 0.031265 | 13    |
| 600330 | 2016 | 0.837 | 0.04 | 0.693147 | 0.48045301 | 22.28511 | 0.031265 | 13    |
| 603889 | 2016 | -0.66 | 0.04 | 0.693147 | 0.48045301 | 20.7859  | 0.135929 | 37.64 |
| 2562   | 2016 | 0.804 | 0.04 | 0.693147 | 0.48045301 | 21.59123 | 0.108296 | 25.78 |
| 2381   | 2016 | -0.45 | 0.04 | 0.693147 | 0.48045301 | 21.60963 | 0.018398 | 20.1  |
| 2067   | 2016 | -0.5  | 0.04 | 0.693147 | 0.48045301 | 22.33372 | 0.093928 | 16.29 |
| 600330 | 2016 | -0.14 | 0.04 | 0.693147 | 0.48045301 | 22.28511 | 0.031265 | 13    |
| 600208 | 2016 | 0.347 | 0.04 | 0.693147 | 0.48045301 | 25.43793 | 0.195569 | 32.41 |
| 600208 | 2016 | 0.347 | 0.04 | 0.693147 | 0.48045301 | 24.58066 | 0.195569 | 32.41 |
| 600235 | 2016 | -0.4  | 0.04 | 0.693147 | 0.48045301 | 21.55307 | 0.007875 | 34.3  |
| 300461 | 2016 | -0.38 | 0.04 | 0.693147 | 0.48045301 | 20.35881 | 0.068972 | 21.32 |
| 2404   | 2016 | -0.54 | 0.04 | 0.693147 | 0.48045301 | 21.54887 | 0.077599 | 21.83 |
| 600796 | 2016 | 0.357 | 0.04 | 0.693147 | 0.48045301 | 20.75139 | 0.063345 | 33.3  |
| 603799 | 2016 | 0.113 | 0.04 | 0.693147 | 0.48045301 | 23.08462 | 0.013289 | 26.16 |
| 2188   | 2016 | 0.329 | 0.04 | 0.693147 | 0.48045301 | 21.57937 | 0.044642 | 20.03 |
| 2067   | 2016 | -0.08 | 0.04 | 0.693147 | 0.48045301 | 22.46206 | 0.093928 | 16.29 |
| 600330 | 2016 | 0.175 | 0.04 | 0.693147 | 0.48045301 | 22.28511 | 0.031265 | 13    |
| 2522   | 2016 | 0.678 | 0.04 | 0.693147 | 0.48045301 | 21.22029 | 0.059124 | 45.07 |
| 2562   | 2016 | 0.804 | 0.04 | 0.693147 | 0.48045301 | 21.59123 | 0.108296 | 25.78 |
| 603889 | 2016 | 0.577 | 0.04 | 0.693147 | 0.48045301 | 21.23082 | 0.135929 | 37.64 |
| 2648   | 2016 | 0.089 | 0.04 | 0.693147 | 0.48045301 | 22.732   | 0.090638 | 49.66 |
| 2718   | 2016 | -0.52 | 0.04 | 0.693147 | 0.48045301 | 20.87256 | 0.121224 | 35.32 |
| 600235 | 2016 | 0.297 | 0.04 | 0.693147 | 0.48045301 | 21.55307 | 0.007875 | 34.3  |
| 600235 | 2016 | -0.55 | 0.04 | 0.693147 | 0.48045301 | 21.55307 | 0.007875 | 34.3  |
| 600330 | 2016 | -0.28 | 0.04 | 0.693147 | 0.48045301 | 22.28511 | 0.031265 | 13    |
| 600176 | 2016 | -0.32 | 0.04 | 0.693147 | 0.48045301 | 23.89849 | 0.138372 | 26.97 |
| 2206   | 2016 | -0.35 | 0.04 | 0.693147 | 0.48045301 | 22.15748 | 0.091814 | 23.34 |
| 2522   | 2016 | 0.678 | 0.04 | 0.693147 | 0.48045301 | 21.45814 | 0.059124 | 45.07 |
| 300461 | 2016 | -0.06 | 0.04 | 0.693147 | 0.48045301 | 20.66634 | 0.068972 | 21.32 |
| 2206   | 2016 | -0.35 | 0.04 | 0.693147 | 0.48045301 | 22.15748 | 0.091814 | 23.34 |
| 2381   | 2016 | -0.6  | 0.04 | 0.693147 | 0.48045301 | 21.36298 | 0.018398 | 20.1  |
| 601233 | 2016 | -0.61 | 0.04 | 0.693147 | 0.48045301 | 23.66773 | 0.103707 | 31.6  |
| 300488 | 2016 | 0.272 | 0.04 | 0.693147 | 0.48045301 | 20.36573 | 0.113214 | 51    |
| 2206   | 2016 | -0.35 | 0.04 | 0.693147 | 0.48045301 | 22.14157 | 0.091814 | 23.34 |
| 2648   | 2016 | -0.03 | 0.04 | 0.693147 | 0.48045301 | 22.732   | 0.090638 | 49.66 |
| 600176 | 2016 | -0.67 | 0.04 | 0.693147 | 0.48045301 | 23.42173 | 0.138372 | 26.97 |
| 601233 | 2016 | -0.25 | 0.04 | 0.693147 | 0.48045301 | 23.66773 | 0.103707 | 31.6  |
| 601002 | 2016 | -0.72 | 0.04 | 0.693147 | 0.48045301 | 22.11194 | 0.032361 | 41.35 |
| 2381   | 2016 | -0.53 | 0.04 | 0.693147 | 0.48045301 | 21.60963 | 0.018398 | 20.1  |
| 2206   | 2016 | -0.35 | 0.04 | 0.693147 | 0.48045301 | 22.15748 | 0.091814 | 23.34 |
| 2648   | 2016 | -0.04 | 0.04 | 0.693147 | 0.48045301 | 22.732   | 0.090638 | 49.66 |

|        |      |       |      |          |            |          |          |       |
|--------|------|-------|------|----------|------------|----------|----------|-------|
| 2381   | 2016 | -0.54 | 0.04 | 0.693147 | 0.48045301 | 21.60963 | 0.018398 | 20.1  |
| 601233 | 2016 | -0.6  | 0.04 | 0.693147 | 0.48045301 | 23.66773 | 0.103707 | 31.6  |
| 2188   | 2016 | -0.14 | 0.04 | 0.693147 | 0.48045301 | 21.40063 | 0.044642 | 20.03 |
| 2522   | 2016 | -0.46 | 0.04 | 0.693147 | 0.48045301 | 21.22029 | 0.059124 | 45.07 |
| 600235 | 2016 | -0.36 | 0.04 | 0.693147 | 0.48045301 | 21.55307 | 0.007875 | 34.3  |
| 2648   | 2016 | -0.04 | 0.04 | 0.693147 | 0.48045301 | 22.732   | 0.090638 | 49.66 |
| 601002 | 2016 | -0.43 | 0.04 | 0.693147 | 0.48045301 | 22.16854 | 0.032361 | 41.35 |
| 2404   | 2016 | 0.487 | 0.04 | 0.693147 | 0.48045301 | 21.54887 | 0.077599 | 21.83 |
| 2188   | 2016 | 0.329 | 0.04 | 0.693147 | 0.48045301 | 21.40063 | 0.044642 | 20.03 |
| 2404   | 2016 | -0.54 | 0.04 | 0.693147 | 0.48045301 | 21.54887 | 0.077599 | 21.83 |
| 600235 | 2016 | 0.297 | 0.04 | 0.693147 | 0.48045301 | 21.55307 | 0.007875 | 34.3  |
| 603799 | 2016 | 0.113 | 0.04 | 0.693147 | 0.48045301 | 23.08462 | 0.013289 | 26.16 |
| 2067   | 2016 | -0.19 | 0.04 | 0.693147 | 0.48045301 | 22.46206 | 0.093928 | 16.29 |
| 2381   | 2016 | -0.17 | 0.04 | 0.693147 | 0.48045301 | 21.60963 | 0.018398 | 20.1  |
| 2144   | 2016 | -0.28 | 0.04 | 0.693147 | 4.80E-01   | 21.4434  | 0.059147 | 21.36 |
| 601002 | 2016 | -0.72 | 0.04 | 0.693147 | 4.80E-01   | 22.16854 | 0.032361 | 41.35 |
| 2144   | 2016 | -0.26 | 0.04 | 0.693147 | 4.80E-01   | 21.42991 | 0.059147 | 21.36 |
| 603889 | 2016 | -0.66 | 0.04 | 0.693147 | 4.80E-01   | 21.23082 | 0.135929 | 37.64 |
| 600330 | 2016 | 0.837 | 0.04 | 0.693147 | 4.80E-01   | 22.28511 | 0.031265 | 13    |
| 2404   | 2016 | -0.54 | 0.04 | 0.693147 | 4.80E-01   | 21.54887 | 0.077599 | 21.83 |
| 600235 | 2016 | -0.36 | 0.04 | 0.693147 | 4.80E-01   | 21.55307 | 0.007875 | 34.3  |
| 2067   | 2016 | -0.03 | 0.04 | 0.693147 | 4.80E-01   | 22.46206 | 0.093928 | 16.29 |
| 601233 | 2016 | -0.6  | 0.04 | 0.693147 | 4.80E-01   | 23.66773 | 0.103707 | 31.6  |
| 600273 | 2016 | 0.298 | 0.04 | 0.693147 | 4.80E-01   | 22.64134 | 0.186678 | 44.04 |
| 600796 | 2016 | 0.357 | 0.04 | 0.693147 | 4.80E-01   | 20.75139 | 0.063345 | 33.3  |
| 600330 | 2016 | 0.175 | 0.04 | 0.693147 | 4.80E-01   | 22.28511 | 0.031265 | 13    |
| 601002 | 2016 | -0.19 | 0.04 | 0.693147 | 4.80E-01   | 22.16854 | 0.032361 | 41.35 |
| 2067   | 2016 | -0.08 | 0.04 | 0.693147 | 4.80E-01   | 22.46206 | 0.093928 | 16.29 |
| 601002 | 2016 | -0.41 | 0.04 | 0.693147 | 4.80E-01   | 22.16854 | 0.032361 | 41.35 |
| 601233 | 2016 | -0.91 | 0.04 | 0.693147 | 4.80E-01   | 23.66773 | 0.103707 | 31.6  |
| 600330 | 2016 | 0.175 | 0.04 | 0.693147 | 4.80E-01   | 22.28511 | 0.031265 | 13    |
| 600307 | 2016 | -0.5  | 0.02 | 1.612094 | 2.60E+00   | 24.35647 | 0.002366 | 54.79 |
| 600307 | 2016 | -0.5  | 0.02 | 1.612094 | 2.60E+00   | 24.46805 | 0.002366 | 54.79 |
| 600307 | 2016 | -0.5  | 0.02 | 1.612094 | 2.5988457  | 24.35647 | 0.002366 | 54.79 |
| 600307 | 2016 | -0.5  | 0.02 | 1.612094 | 2.5988457  | 24.35647 | 0.002366 | 54.79 |
| 2145   | 2016 | -0.41 | 0.02 | 1.612094 | 2.5988457  | 22.3769  | 0.032799 | 37    |
| 2145   | 2016 | -0.41 | 0.02 | 1.612094 | 2.5988457  | 21.70276 | 0.032799 | 37    |
| 600307 | 2016 | -0.5  | 0.02 | 1.612094 | 2.5988457  | 24.35647 | 0.002366 | 54.79 |
| 2145   | 2016 | -0.41 | 0.02 | 1.612094 | 2.5988457  | 22.3769  | 0.032799 | 37    |
| 2145   | 2016 | -0.41 | 0.02 | 1.612094 | 2.5988457  | 22.3769  | 0.032799 | 37    |
| 2145   | 2016 | -0.41 | 0.02 | 1.612094 | 2.5988457  | 22.3769  | 0.032799 | 37    |
| 300254 | 2016 | 0.821 | 0    | 0.983319 | 0.9669168  | 21.08275 | 0.039336 | 11.91 |
| 300254 | 2016 | 0.821 | 0    | 0.983319 | 0.9669168  | 20.80555 | 0.039336 | 11.91 |
| 300254 | 2016 | 0.821 | 0    | 0.983319 | 0.9669168  | 21.08275 | 0.039336 | 11.91 |
| 300254 | 2016 | 0.821 | 0    | 0.983319 | 0.9669168  | 21.08275 | 0.039336 | 11.91 |
| 300254 | 2016 | 0.821 | 0    | 0.983319 | 0.9669168  | 21.08275 | 0.039336 | 11.91 |
| 300254 | 2016 | 0.821 | 0    | 0.983319 | 0.9669168  | 21.08275 | 0.039336 | 11.91 |
| 300254 | 2016 | 0.821 | 0    | 0.983319 | 0.9669168  | 21.08275 | 0.039336 | 11.91 |
| 300254 | 2016 | 0.821 | 0    | 0.983319 | 0.9669168  | 21.08275 | 0.039336 | 11.91 |
| 300254 | 2016 | 0.821 | 0    | 0.983319 | 0.9669168  | 21.08275 | 0.039336 | 11.91 |
| 300254 | 2016 | 0.821 | 0    | 0.983319 | 0.9669168  | 21.08275 | 0.039336 | 11.91 |
| 300254 | 2016 | 0.821 | 0    | 0.983319 | 0.9669168  | 21.08275 | 0.039336 | 11.91 |
| 300254 | 2016 | 0.821 | 0    | 0.983319 | 0.9669168  | 21.08275 | 0.039336 | 11.91 |
| 300254 | 2016 | 0.821 | 0    | 0.983319 | 9.67E-01   | 21.08275 | 0.039336 | 11.91 |
| 985    | 2016 | -0.15 | 0.02 | 1.392538 | 1.94E+00   | 20.31195 | 0.064325 | 39.34 |
| 985    | 2016 | -0.15 | 0.02 | 1.392538 | 1.94E+00   | 20.31195 | 0.064325 | 39.34 |
| 985    | 2016 | -0.15 | 0.02 | 1.392538 | 1.939163   | 20.31195 | 0.064325 | 39.34 |

|        |      |       |      |          |            |          |          |       |
|--------|------|-------|------|----------|------------|----------|----------|-------|
| 2185   | 2016 | 0.108 | 0.02 | 0.693147 | 0.48045301 | 22.76153 | 0.075068 | 27.75 |
| 2185   | 2016 | 0.078 | 0.02 | 0.693147 | 0.48045301 | 22.76153 | 0.075068 | 27.75 |
| 2772   | 2016 | -0.69 | 0.02 | 0.693147 | 0.48045301 | 21.89097 | 0.070378 | 29.72 |
| 2185   | 2016 | -0.04 | 0.02 | 0.693147 | 0.48045301 | 22.76153 | 0.075068 | 27.75 |
| 2185   | 2016 | -0.49 | 0.02 | 0.693147 | 0.48045301 | 22.76153 | 0.075068 | 27.75 |
| 2185   | 2016 | 0.243 | 0.02 | 0.693147 | 0.48045301 | 22.76153 | 0.075068 | 27.75 |
| 2185   | 2016 | 0.238 | 0.02 | 0.693147 | 0.48045301 | 22.76153 | 0.075068 | 27.75 |
| 2772   | 2016 | -0.55 | 0.02 | 0.693147 | 0.48045301 | 21.89097 | 0.070378 | 29.72 |
| 2185   | 2016 | 0.108 | 0.02 | 0.693147 | 0.48045301 | 22.76153 | 0.075068 | 27.75 |
| 2772   | 2016 | -0.64 | 0.02 | 0.693147 | 0.48045301 | 21.89097 | 0.070378 | 29.72 |
| 2185   | 2016 | 0.081 | 0.02 | 0.693147 | 0.48045301 | 22.76153 | 0.075068 | 27.75 |
| 2185   | 2016 | -0.49 | 0.02 | 0.693147 | 0.48045301 | 22.47414 | 0.075068 | 27.75 |
| 2772   | 2016 | -0.14 | 0.02 | 0.693147 | 0.48045301 | 21.89097 | 0.070378 | 29.72 |
| 2772   | 2016 | -0.14 | 0.02 | 0.693147 | 0.48045301 | 21.89097 | 0.070378 | 29.72 |
| 2772   | 2016 | -0.53 | 0.02 | 0.693147 | 0.48045301 | 21.89097 | 0.070378 | 29.72 |
| 2185   | 2016 | -0.04 | 0.02 | 0.693147 | 0.48045301 | 22.76153 | 0.075068 | 27.75 |
| 2772   | 2016 | -0.53 | 0.02 | 0.693147 | 0.48045301 | 21.50259 | 0.070378 | 29.72 |
| 795    | 2016 | -0.48 | 0    | 1.262242 | 1.5932539  | 21.64954 | 0.01569  | 39.38 |
| 600281 | 2016 | -0.97 | 0    | 1.262242 | 1.5932539  | 21.47416 | 0.059283 | 43.48 |
| 2640   | 2016 | -0.77 | 0    | 1.262242 | 1.5932539  | 22.68453 | 0.100736 | 19.83 |
| 600169 | 2016 | 0.398 | 0    | 1.262242 | 1.5932539  | 24.09277 | -0.4336  | 25.84 |
| 795    | 2016 | -0.54 | 0    | 1.262242 | 1.5932539  | 21.64954 | 0.01569  | 39.38 |
| 825    | 2016 | 0.094 | 0    | 1.262242 | 1.5932539  | 25.00805 | 0.044176 | 63.49 |
| 600546 | 2016 | -0.98 | 0    | 1.262242 | 1.5932539  | 24.52681 | 0.087943 | 57.43 |
| 983    | 2016 | -0.24 | 0    | 1.262242 | 1.5932539  | 24.71007 | 0.023267 | 54.4  |
| 825    | 2016 | 0.094 | 0    | 1.262242 | 1.5932539  | 25.00805 | 0.044176 | 63.49 |
| 600495 | 2016 | -0.23 | 0    | 1.262242 | 1.5932539  | 21.83127 | 0.008679 | 30.79 |
| 983    | 2016 | -0.57 | 0    | 1.262242 | 1.5932539  | 23.96748 | 0.023267 | 54.4  |
| 600495 | 2016 | 0.019 | 0    | 1.262242 | 1.5932539  | 22.02671 | 0.008679 | 30.79 |
| 968    | 2016 | -0.34 | 0    | 1.262242 | 1.5932539  | 22.55202 | 0.255409 | 25.19 |
| 795    | 2016 | -0.54 | 0    | 1.262242 | 1.5932539  | 21.64954 | 0.01569  | 39.38 |
| 795    | 2016 | -0.54 | 0    | 1.262242 | 1.5932539  | 21.64954 | 0.01569  | 39.38 |
| 600281 | 2016 | -0.97 | 0    | 1.262242 | 1.5932539  | 21.26962 | 0.059283 | 43.48 |
| 600169 | 2016 | 0.474 | 0    | 1.262242 | 1.5932539  | 24.09277 | -0.4336  | 25.84 |
| 600546 | 2016 | -0.98 | 0    | 1.262242 | 1.5932539  | 24.52681 | 0.087943 | 57.43 |
| 600495 | 2016 | 0.019 | 0    | 1.262242 | 1.5932539  | 22.02671 | 0.008679 | 30.79 |
| 968    | 2016 | -0.34 | 0    | 1.262242 | 1.5932539  | 21.85535 | 0.255409 | 25.19 |
| 968    | 2016 | -0.34 | 0    | 1.262242 | 1.5932539  | 22.55202 | 0.255409 | 25.19 |
| 403    | 2016 | -0.62 | 0    | 1.262242 | 1.5932539  | 20.96981 | 0.077719 | 22.61 |
| 795    | 2016 | -0.54 | 0    | 1.262242 | 1.5932539  | 21.44182 | 0.01569  | 39.38 |
| 600546 | 2016 | -0.88 | 0    | 1.262242 | 1.5932539  | 24.52681 | 0.087943 | 57.43 |
| 403    | 2016 | -0.62 | 0    | 1.262242 | 1.5932539  | 20.10336 | 0.077719 | 22.61 |
| 600546 | 2016 | -0.88 | 0    | 1.262242 | 1.5932539  | 24.52681 | 0.087943 | 57.43 |
| 2640   | 2016 | 0.11  | 0    | 1.262242 | 1.5932539  | 22.68453 | 0.100736 | 19.83 |
| 968    | 2016 | -0.34 | 0    | 1.262242 | 1.5932539  | 22.55202 | 0.255409 | 25.19 |
| 600546 | 2016 | -0.31 | 0    | 1.262242 | 1.5932539  | 24.52681 | 0.087943 | 57.43 |
| 795    | 2016 | 0.275 | 0    | 1.262242 | 1.5932539  | 21.64954 | 0.01569  | 39.38 |
| 600546 | 2016 | -0.98 | 0    | 1.262242 | 1.5932539  | 24.52681 | 0.087943 | 57.43 |
| 825    | 2016 | 0.094 | 0    | 1.262242 | 1.5932539  | 25.00805 | 0.044176 | 63.49 |
| 2640   | 2016 | 0.552 | 0    | 1.262242 | 1.5932539  | 22.68453 | 0.100736 | 19.83 |
| 795    | 2016 | -0.54 | 0    | 1.262242 | 1.5932539  | 21.64954 | 0.01569  | 39.38 |
| 825    | 2016 | 0.094 | 0    | 1.262242 | 1.5932539  | 24.95544 | 0.044176 | 63.49 |
| 2640   | 2016 | -0.77 | 0    | 1.262242 | 1.5932539  | 22.33202 | 0.100736 | 19.83 |
| 795    | 2016 | -0.29 | 0    | 1.262242 | 1.5932539  | 21.64954 | 0.01569  | 39.38 |

|        |      |       |      |          |            |          |          |       |
|--------|------|-------|------|----------|------------|----------|----------|-------|
| 795    | 2016 | -0.54 | 0    | 1.262242 | 1.5932539  | 21.64954 | 0.01569  | 39.38 |
| 600169 | 2016 | 0.623 | 0    | 1.262242 | 1.5932539  | 23.86457 | -0.4336  | 25.84 |
| 600546 | 2016 | -0.98 | 0    | 1.262242 | 1.5932539  | 24.52681 | 0.087943 | 57.43 |
| 403    | 2016 | -0.62 | 0    | 1.262242 | 1.5932539  | 20.96981 | 0.077719 | 22.61 |
| 600546 | 2016 | -0.98 | 0    | 1.262242 | 1.5932539  | 24.52681 | 0.087943 | 57.43 |
| 600281 | 2016 | -0.97 | 0    | 1.262242 | 1.5932539  | 21.47416 | 0.059283 | 43.48 |
| 600495 | 2016 | -0.29 | 0    | 1.262242 | 1.5932539  | 22.02671 | 0.008679 | 30.79 |
| 968    | 2016 | -0.34 | 0    | 1.262242 | 1.5932539  | 22.55202 | 0.255409 | 25.19 |
| 300486 | 2016 | -0.06 | 0    | 1.262242 | 1.5932539  | 20.76784 | -0.07926 | 34.85 |
| 600495 | 2016 | 0.043 | 0    | 1.262242 | 1.5932539  | 22.02671 | 0.008679 | 30.79 |
| 795    | 2016 | -0.38 | 0    | 1.262242 | 1.5932539  | 21.64954 | 0.01569  | 39.38 |
| 600495 | 2016 | 0.019 | 0    | 1.262242 | 1.5932539  | 22.02671 | 0.008679 | 30.79 |
| 600169 | 2016 | 0.474 | 0    | 1.262242 | 1.5932539  | 24.09277 | -0.4336  | 25.84 |
| 600169 | 2016 | 0.426 | 0    | 1.262242 | 1.5932539  | 24.09277 | -0.4336  | 25.84 |
| 600546 | 2016 | -0.98 | 0    | 1.262242 | 1.5932539  | 24.52681 | 0.087943 | 57.43 |
| 795    | 2016 | -0.21 | 0    | 1.262242 | 1.5932539  | 21.64954 | 0.01569  | 39.38 |
| 600546 | 2016 | -0.88 | 0    | 1.262242 | 1.5932539  | 24.19626 | 0.087943 | 57.43 |
| 600546 | 2016 | -0.98 | 0    | 1.262242 | 1.5932539  | 24.52681 | 0.087943 | 57.43 |
| 983    | 2016 | -0.57 | 0    | 1.262242 | 1.5932539  | 24.71007 | 0.023267 | 54.4  |
| 403    | 2016 | -0.62 | 0    | 1.262242 | 1.5932539  | 20.96981 | 0.077719 | 22.61 |
| 795    | 2016 | -0.32 | 0    | 1.262242 | 1.5932539  | 21.64954 | 0.01569  | 39.38 |
| 600169 | 2016 | 0.465 | 0    | 1.262242 | 1.5932539  | 24.09277 | -0.4336  | 25.84 |
| 2640   | 2016 | 0.552 | 0    | 1.262242 | 1.5932539  | 22.68453 | 0.100736 | 19.83 |
| 600546 | 2016 | -0.98 | 0    | 1.262242 | 1.5932539  | 24.52681 | 0.087943 | 57.43 |
| 600169 | 2016 | -0.28 | 0    | 1.262242 | 1.5932539  | 24.09277 | -0.4336  | 25.84 |
| 983    | 2016 | -0.37 | 0    | 1.262242 | 1.5932539  | 24.71007 | 0.023267 | 54.4  |
| 983    | 2016 | -0.24 | 0    | 1.262242 | 1.5932539  | 24.71007 | 0.023267 | 54.4  |
| 795    | 2016 | -0.08 | 0    | 1.262242 | 1.5932539  | 21.64954 | 0.01569  | 39.38 |
| 300486 | 2016 | -0.06 | 0    | 1.262242 | 1.5932539  | 20.73383 | -0.07926 | 34.85 |
| 600169 | 2016 | 0.398 | 0    | 1.262242 | 1.5932539  | 24.09277 | -0.4336  | 25.84 |
| 300486 | 2016 | -0.06 | 0    | 1.262242 | 1.5932539  | 20.76784 | -0.07926 | 34.85 |
| 600281 | 2016 | -0.97 | 0    | 1.262242 | 1.5932539  | 21.47416 | 0.059283 | 43.48 |
| 600546 | 2016 | -0.98 | 0    | 1.262242 | 1.5932539  | 24.52681 | 0.087943 | 57.43 |
| 600281 | 2016 | -0.97 | 0    | 1.262242 | 1.5932539  | 21.47416 | 0.059283 | 43.48 |
| 795    | 2016 | -0.32 | 0    | 1.262242 | 1.5932539  | 21.64954 | 0.01569  | 39.38 |
| 825    | 2016 | 0.094 | 0    | 1.262242 | 1.5932539  | 25.00805 | 0.044176 | 63.49 |
| 600495 | 2016 | -0.62 | 0    | 1.262242 | 1.5932539  | 22.02671 | 0.008679 | 30.79 |
| 300387 | 2016 | 0.801 | 0.05 | 0.171225 | 0.02931808 | 20.57494 | 0.115684 | 32.08 |
| 300387 | 2016 | 0.801 | 0.05 | 0.171225 | 0.02931808 | 20.90535 | 0.115684 | 32.08 |
| 707    | 2016 | 0.67  | 0.05 | 0.171225 | 0.02931808 | 23.08417 | -0.4336  | 25.11 |
| 300387 | 2016 | -0.23 | 0.05 | 0.171225 | 0.02931808 | 20.90535 | 0.115684 | 32.08 |
| 707    | 2016 | 0.67  | 0.05 | 0.171225 | 0.02931808 | 23.08417 | -0.4336  | 25.11 |
| 707    | 2016 | 0.67  | 0.05 | 0.171225 | 0.02931808 | 23.08417 | -0.4336  | 25.11 |
| 300387 | 2016 | -0.23 | 0.05 | 0.171225 | 2.93E-02   | 20.90535 | 0.115684 | 32.08 |
| 707    | 2016 | 0.67  | 0.05 | 0.171225 | 2.93E-02   | 22.39305 | -0.4336  | 25.11 |
| 300387 | 2016 | -0.23 | 0.05 | 0.171225 | 2.93E-02   | 20.90535 | 0.115684 | 32.08 |
| 707    | 2016 | 0.67  | 0.05 | 0.171225 | 2.93E-02   | 23.08417 | -0.4336  | 25.11 |
| 300387 | 2016 | 0.746 | 0.05 | 0.171225 | 2.93E-02   | 20.90535 | 0.115684 | 32.08 |
| 707    | 2016 | 0.67  | 0.05 | 0.171225 | 2.93E-02   | 23.08417 | -0.4336  | 25.11 |
| 300436 | 2016 | 1.547 | 0.04 | 1.216881 | 1.48E+00   | 20.36754 | 0.120235 | 24.54 |
| 300436 | 2016 | 1.547 | 0.04 | 1.216881 | 1.48E+00   | 20.36754 | 0.120235 | 24.54 |
| 300436 | 2016 | 1.547 | 0.04 | 1.216881 | 1.48E+00   | 20.3723  | 0.120235 | 24.54 |
| 603088 | 2016 | -0.1  | 0.04 | 0.025156 | 6.33E-04   | 20.28018 | 0.040279 | 33.08 |
| 2103   | 2016 | -0.55 | 0.04 | 0.025156 | 6.33E-04   | 21.49152 | 0.068734 | 22.13 |

|        |      |       |      |          |            |          |          |        |
|--------|------|-------|------|----------|------------|----------|----------|--------|
| 601018 | 2016 | -0.49 | 0.04 | 0.025156 | 0.00063282 | 24.78626 | 0.067917 | 74.18  |
| 2124   | 2016 | -0.11 | 0.04 | 0.025156 | 0.00063282 | 21.63559 | 0.261678 | 29.73  |
| 600177 | 2016 | 0.347 | 0.04 | 0.025156 | 0.00063282 | 24.88077 | 0.161079 | 29.01  |
| 601689 | 2016 | -0.22 | 0.04 | 0.025156 | 0.00063282 | 22.32192 | 0.181284 | 73.7   |
| 300441 | 2016 | -0.65 | 0.04 | 0.025156 | 0.00063282 | 21.06688 | 0.070406 | 55.4   |
| 601789 | 2016 | -0.54 | 0.04 | 0.025156 | 6.33E-04   | 23.29081 | 0.080533 | 39.25  |
| 2164   | 2016 | -0.08 | 0.04 | 0.025156 | 6.33E-04   | 21.26491 | 0.010255 | 31.08  |
| 601789 | 2016 | -0.39 | 0.04 | 0.025156 | 6.33E-04   | 23.29081 | 0.080533 | 39.25  |
| 2164   | 2016 | -0.08 | 0.04 | 0.025156 | 6.33E-04   | 21.26491 | 0.010255 | 31.08  |
| 600884 | 2016 | -0.87 | 0.04 | 0.025156 | 6.33E-04   | 23.40336 | 0.046036 | 23.79  |
| 300100 | 2016 | -0.64 | 0.04 | 0.025156 | 6.33E-04   | 22.43234 | 0.136331 | 48.01  |
| 600152 | 2016 | -0.62 | 0.04 | 0.025156 | 6.33E-04   | 20.77514 | -0.12213 | 22.27  |
| 601339 | 2016 | -0.5  | 0.04 | 0.025156 | 6.33E-04   | 23.16905 | 0.082913 | 29.72  |
| 300439 | 2016 | 0.879 | 0.04 | 0.025156 | 6.33E-04   | 21.95239 | 0.099203 | 50.66  |
| 300314 | 2016 | -0.44 | 0.04 | 0.025156 | 6.33E-04   | 20.54776 | 0.083049 | 24.69  |
| 600491 | 2016 | -0.38 | 0.04 | 0.025156 | 6.33E-04   | 24.03481 | 0.063778 | 35.04  |
| 2124   | 2016 | 0.012 | 0.04 | 0.025156 | 6.33E-04   | 21.63559 | 0.261678 | 29.73  |
| 2164   | 2016 | -0.08 | 0.04 | 0.025156 | 6.33E-04   | 21.26491 | 0.010255 | 31.08  |
| 2124   | 2016 | -0.27 | 0.04 | 0.025156 | 6.33E-04   | 21.63559 | 0.261678 | 29.73  |
| 2124   | 2016 | 0.331 | 0.04 | 0.025156 | 0.00063282 | 21.63559 | 0.261678 | 29.73  |
| 2120   | 2016 | -0.93 | 0.04 | 0.025156 | 0.00063282 | 22.62677 | 0.302158 | 56.53  |
| 2048   | 2016 | -0.61 | 0.04 | 0.025156 | 0.00063282 | 23.32742 | 0.179502 | 16.97  |
| 600366 | 2016 | 0.556 | 0.04 | 0.025156 | 0.00063282 | 22.46893 | 0.181009 | 31.37  |
| 2120   | 2016 | -0.16 | 0.04 | 0.025156 | 0.00063282 | 23.61187 | 0.302158 | 56.53  |
| 2586   | 2016 | -0.27 | 0.04 | 0.025156 | 0.00063282 | 22.44501 | 0.053077 | 41.49  |
| 600366 | 2016 | 0.613 | 0.04 | 0.025156 | 0.00063282 | 22.28034 | 0.181009 | 31.37  |
| 603088 | 2016 | -0.1  | 0.04 | 0.025156 | 0.00063282 | 20.30199 | 0.040279 | 33.08  |
| 2586   | 2016 | -0.15 | 0.04 | 0.025156 | 0.00063282 | 22.44501 | 0.053077 | 41.49  |
| 300100 | 2016 | -0.75 | 0.04 | 0.025156 | 0.00063282 | 21.8814  | 0.136331 | 48.01  |
| 600366 | 2016 | 0.613 | 0.04 | 0.025156 | 0.00063282 | 22.46893 | 0.181009 | 31.37  |
| 601689 | 2016 | -0.22 | 0.04 | 0.025156 | 0.00063282 | 22.32192 | 0.181284 | 73.7   |
| 2062   | 2016 | -0.18 | 0.04 | 0.025156 | 0.00063282 | 23.31451 | 0.082047 | 44.93  |
| 2048   | 2016 | -0.68 | 0.04 | 0.025156 | 0.00063282 | 23.32742 | 0.179502 | 16.97  |
| 2103   | 2016 | -0.19 | 0.04 | 0.025156 | 0.00063282 | 21.68541 | 0.068734 | 22.13  |
| 2124   | 2016 | -0.14 | 0.04 | 0.025156 | 0.00063282 | 21.63559 | 0.261678 | 29.73  |
| 2322   | 2016 | 1.025 | 0.04 | 0.025156 | 0.00063282 | 21.90545 | 0.050492 | 31.56  |
| 300441 | 2016 | -0.24 | 0.04 | 0.025156 | 0.00063282 | 21.06688 | 0.070406 | 55.4   |
| 600537 | 2016 | 0.007 | 0.04 | 0.025156 | 0.00063282 | 22.68229 | 0.118439 | 30.361 |
| 600152 | 2016 | -0.9  | 0.04 | 0.025156 | 0.00063282 | 20.77514 | -0.12213 | 22.27  |
| 300441 | 2016 | -0.65 | 0.04 | 0.025156 | 0.00063282 | 21.06688 | 0.070406 | 55.4   |
| 601137 | 2016 | -0.1  | 0.04 | 0.025156 | 0.00063282 | 22.19865 | 0.075326 | 33.91  |
| 600114 | 2016 | -0.32 | 0.04 | 0.025156 | 0.00063282 | 21.76384 | 0.074687 | 19.45  |
| 600366 | 2016 | 0.613 | 0.04 | 0.025156 | 0.00063282 | 22.46893 | 0.181009 | 31.37  |
| 603088 | 2016 | -0.1  | 0.04 | 0.025156 | 0.00063282 | 20.30199 | 0.040279 | 33.08  |
| 600699 | 2016 | -0.54 | 0.04 | 0.025156 | 0.00063282 | 24.34045 | 0.048781 | 45.95  |
| 2586   | 2016 | -0.15 | 0.04 | 0.025156 | 0.00063282 | 22.44501 | 0.053077 | 41.49  |
| 600699 | 2016 | -0.28 | 0.04 | 0.025156 | 0.00063282 | 24.34045 | 0.048781 | 45.95  |
| 601567 | 2016 | 0.506 | 0.04 | 0.025156 | 0.00063282 | 23.17742 | 0.114326 | 32.26  |
| 2124   | 2016 | 0.144 | 0.04 | 0.025156 | 0.00063282 | 21.63559 | 0.261678 | 29.73  |
| 600537 | 2016 | 0.007 | 0.04 | 0.025156 | 0.00063282 | 21.98876 | 0.118439 | 30.361 |
| 600537 | 2016 | 0.007 | 0.04 | 0.025156 | 0.00063282 | 22.68229 | 0.118439 | 30.361 |
| 2120   | 2016 | 0.395 | 0.04 | 0.025156 | 0.00063282 | 22.62677 | 0.302158 | 56.53  |
| 2586   | 2016 | -0.04 | 0.04 | 0.025156 | 0.00063282 | 22.21813 | 0.053077 | 41.49  |
| 300118 | 2016 | -0.3  | 0.04 | 0.025156 | 0.00063282 | 23.02231 | 0.183408 | 32.57  |

|        |      |       |      |          |            |          |          |        |
|--------|------|-------|------|----------|------------|----------|----------|--------|
| 600699 | 2016 | 0.442 | 0.04 | 0.025156 | 0.00063282 | 24.34045 | 0.048781 | 45.95  |
| 300100 | 2016 | -0.09 | 0.04 | 0.025156 | 0.00063282 | 22.43234 | 0.136331 | 48.01  |
| 300076 | 2016 | 0.551 | 0.04 | 0.025156 | 0.00063282 | 20.85152 | -0.0205  | 30.02  |
| 300307 | 2016 | 0.036 | 0.04 | 0.025156 | 0.00063282 | 22.29286 | 0.030405 | 30.95  |
| 300100 | 2016 | -0.75 | 0.04 | 0.025156 | 0.00063282 | 22.43234 | 0.136331 | 48.01  |
| 601689 | 2016 | 0.777 | 0.04 | 0.025156 | 0.00063282 | 22.32192 | 0.181284 | 73.7   |
| 603015 | 2016 | 0.377 | 0.04 | 0.025156 | 0.00063282 | 21.04752 | 0.041555 | 60.32  |
| 2124   | 2016 | -0.11 | 0.04 | 0.025156 | 0.00063282 | 21.63559 | 0.261678 | 29.73  |
| 300307 | 2016 | 0.179 | 0.04 | 0.025156 | 0.00063282 | 22.29286 | 0.030405 | 30.95  |
| 601689 | 2016 | -0.22 | 0.04 | 0.025156 | 0.00063282 | 22.32192 | 0.181284 | 73.7   |
| 600130 | 2016 | -0.33 | 0.04 | 0.025156 | 0.00063282 | 21.08211 | 0.030957 | 16.4   |
| 2164   | 2016 | -0.08 | 0.04 | 0.025156 | 0.00063282 | 21.26491 | 0.010255 | 31.08  |
| 300439 | 2016 | 0.024 | 0.04 | 0.025156 | 0.00063282 | 21.95239 | 0.099203 | 50.66  |
| 300163 | 2016 | -0.28 | 0.04 | 0.025156 | 0.00063282 | 20.93028 | 0.094146 | 36.49  |
| 300439 | 2016 | -0.24 | 0.04 | 0.025156 | 0.00063282 | 21.95239 | 0.099203 | 50.66  |
| 601567 | 2016 | -0.28 | 0.04 | 0.025156 | 0.00063282 | 23.17742 | 0.114326 | 32.26  |
| 600699 | 2016 | -0.3  | 0.04 | 0.025156 | 0.00063282 | 23.80396 | 0.048781 | 45.95  |
| 600491 | 2016 | -0.95 | 0.04 | 0.025156 | 0.00063282 | 24.03481 | 0.063778 | 35.04  |
| 2048   | 2016 | -0.68 | 0.04 | 0.025156 | 0.00063282 | 23.32742 | 0.179502 | 16.97  |
| 601018 | 2016 | -0.32 | 0.04 | 0.025156 | 0.00063282 | 24.78626 | 0.067917 | 74.18  |
| 300163 | 2016 | -0.28 | 0.04 | 0.025156 | 0.00063282 | 20.6518  | 0.094146 | 36.49  |
| 2062   | 2016 | -0.18 | 0.04 | 0.025156 | 0.00063282 | 23.01145 | 0.082047 | 44.93  |
| 2473   | 2016 | -0.72 | 0.04 | 0.025156 | 0.00063282 | 20.10336 | -0.1017  | 18.13  |
| 600114 | 2016 | -0.03 | 0.04 | 0.025156 | 0.00063282 | 21.76384 | 0.074687 | 19.45  |
| 600491 | 2016 | -0.3  | 0.04 | 0.025156 | 0.00063282 | 24.03481 | 0.063778 | 35.04  |
| 300163 | 2016 | -0.28 | 0.04 | 0.025156 | 0.00063282 | 20.93028 | 0.094146 | 36.49  |
| 601018 | 2016 | -0.49 | 0.04 | 0.025156 | 0.00063282 | 24.78626 | 0.067917 | 74.18  |
| 601567 | 2016 | 0.663 | 0.04 | 0.025156 | 0.00063282 | 23.17742 | 0.114326 | 32.26  |
| 603015 | 2016 | 0.553 | 0.04 | 0.025156 | 0.00063282 | 20.84688 | 0.041555 | 60.32  |
| 600884 | 2016 | -0.87 | 0.04 | 0.025156 | 0.00063282 | 23.40336 | 0.046036 | 23.79  |
| 300118 | 2016 | -0.3  | 0.04 | 0.025156 | 0.00063282 | 23.02231 | 0.183408 | 32.57  |
| 2586   | 2016 | -0.81 | 0.04 | 0.025156 | 0.00063282 | 22.44501 | 0.053077 | 41.49  |
| 601567 | 2016 | 0.462 | 0.04 | 0.025156 | 0.00063282 | 23.17742 | 0.114326 | 32.26  |
| 300307 | 2016 | 0.167 | 0.04 | 0.025156 | 0.00063282 | 22.29286 | 0.030405 | 30.95  |
| 300163 | 2016 | -0.28 | 0.04 | 0.025156 | 0.00063282 | 20.93028 | 0.094146 | 36.49  |
| 600699 | 2016 | 0.442 | 0.04 | 0.025156 | 0.00063282 | 24.34045 | 0.048781 | 45.95  |
| 300307 | 2016 | 0.122 | 0.04 | 0.025156 | 0.00063282 | 22.29286 | 0.030405 | 30.95  |
| 600537 | 2016 | 0.007 | 0.04 | 0.025156 | 0.00063282 | 22.68229 | 0.118439 | 30.361 |
| 2322   | 2016 | 0.996 | 0.04 | 0.025156 | 0.00063282 | 21.90545 | 0.050492 | 31.56  |
| 2062   | 2016 | -0.18 | 0.04 | 0.025156 | 0.00063282 | 23.31451 | 0.082047 | 44.93  |
| 300441 | 2016 | -0.38 | 0.04 | 0.025156 | 0.00063282 | 21.06688 | 0.070406 | 55.4   |
| 2048   | 2016 | 0.648 | 0.04 | 0.025156 | 0.00063282 | 23.32742 | 0.179502 | 16.97  |
| 600177 | 2016 | -0.98 | 0.04 | 0.025156 | 0.00063282 | 24.88077 | 0.161079 | 29.01  |
| 603015 | 2016 | 0.553 | 0.04 | 0.025156 | 0.00063282 | 21.04752 | 0.041555 | 60.32  |
| 300441 | 2016 | -0.49 | 0.04 | 0.025156 | 0.00063282 | 21.06688 | 0.070406 | 55.4   |
| 300118 | 2016 | -0.3  | 0.04 | 0.025156 | 0.00063282 | 22.8473  | 0.183408 | 32.57  |
| 2103   | 2016 | -0.19 | 0.04 | 0.025156 | 0.00063282 | 21.68541 | 0.068734 | 22.13  |
| 2048   | 2016 | -0.68 | 0.04 | 0.025156 | 0.00063282 | 22.76067 | 0.179502 | 16.97  |
| 2586   | 2016 | 0.517 | 0.04 | 0.025156 | 0.00063282 | 22.44501 | 0.053077 | 41.49  |
| 300163 | 2016 | -0.28 | 0.04 | 0.025156 | 0.00063282 | 20.93028 | 0.094146 | 36.49  |
| 2322   | 2016 | 0.168 | 0.04 | 0.025156 | 0.00063282 | 21.90545 | 0.050492 | 31.56  |
| 600491 | 2016 | -0.3  | 0.04 | 0.025156 | 0.00063282 | 24.03481 | 0.063778 | 35.04  |
| 300100 | 2016 | -0.75 | 0.04 | 0.025156 | 0.00063282 | 22.43234 | 0.136331 | 48.01  |
| 2322   | 2016 | 1.492 | 0.04 | 0.025156 | 0.00063282 | 21.80646 | 0.050492 | 31.56  |

|        |      |       |      |          |            |          |          |       |
|--------|------|-------|------|----------|------------|----------|----------|-------|
| 2048   | 2016 | -0.68 | 0.04 | 0.025156 | 0.00063282 | 23.32742 | 0.179502 | 16.97 |
| 600114 | 2016 | -0.52 | 0.04 | 0.025156 | 0.00063282 | 21.76384 | 0.074687 | 19.45 |
| 601339 | 2016 | -0.5  | 0.04 | 0.025156 | 0.00063282 | 23.16905 | 0.082913 | 29.72 |
| 300076 | 2016 | 1.001 | 0.04 | 0.025156 | 0.00063282 | 20.85152 | -0.0205  | 30.02 |
| 603606 | 2016 | -0.05 | 0.04 | 0.025156 | 0.00063282 | 21.44485 | 0.06074  | 37.06 |
| 300314 | 2016 | -0.14 | 0.04 | 0.025156 | 0.00063282 | 20.54776 | 0.083049 | 24.69 |
| 300314 | 2016 | -0.07 | 0.04 | 0.025156 | 0.00063282 | 20.54776 | 0.083049 | 24.69 |
| 2048   | 2016 | -0.55 | 0.04 | 0.025156 | 0.00063282 | 23.32742 | 0.179502 | 16.97 |
| 601789 | 2016 | -0.56 | 0.04 | 0.025156 | 0.00063282 | 23.29081 | 0.080533 | 39.25 |
| 2119   | 2016 | -0.32 | 0.04 | 0.025156 | 0.00063282 | 21.1859  | 0.067617 | 19.72 |
| 2103   | 2016 | -0.55 | 0.04 | 0.025156 | 0.00063282 | 21.68541 | 0.068734 | 22.13 |
| 300118 | 2016 | -0.3  | 0.04 | 0.025156 | 0.00063282 | 23.02231 | 0.183408 | 32.57 |
| 601689 | 2016 | -0.19 | 0.04 | 0.025156 | 0.00063282 | 22.32192 | 0.181284 | 73.7  |
| 601789 | 2016 | -0.59 | 0.04 | 0.025156 | 0.00063282 | 23.29081 | 0.080533 | 39.25 |
| 2062   | 2016 | -0.18 | 0.04 | 0.025156 | 0.00063282 | 23.31451 | 0.082047 | 44.93 |
| 300439 | 2016 | -0.24 | 0.04 | 0.025156 | 0.00063282 | 21.95239 | 0.099203 | 50.66 |
| 601567 | 2016 | 0.392 | 0.04 | 0.025156 | 0.00063282 | 23.17742 | 0.114326 | 32.26 |
| 600699 | 2016 | -0.35 | 0.04 | 0.025156 | 0.00063282 | 24.34045 | 0.048781 | 45.95 |
| 2120   | 2016 | -0.93 | 0.04 | 0.025156 | 0.00063282 | 22.62677 | 0.302158 | 56.53 |
| 2048   | 2016 | -0.68 | 0.04 | 0.025156 | 0.00063282 | 23.32742 | 0.179502 | 16.97 |
| 300076 | 2016 | 1.001 | 0.04 | 0.025156 | 0.00063282 | 20.85152 | -0.0205  | 30.02 |
| 600366 | 2016 | 0.521 | 0.04 | 0.025156 | 0.00063282 | 22.46893 | 0.181009 | 31.37 |
| 600366 | 2016 | 0.613 | 0.04 | 0.025156 | 0.00063282 | 22.46893 | 0.181009 | 31.37 |
| 600366 | 2016 | 0.013 | 0.04 | 0.025156 | 0.00063282 | 22.46893 | 0.181009 | 31.37 |
| 600177 | 2016 | 0.347 | 0.04 | 0.025156 | 0.00063282 | 24.88077 | 0.161079 | 29.01 |
| 600491 | 2016 | -0.95 | 0.04 | 0.025156 | 0.00063282 | 23.96219 | 0.063778 | 35.04 |
| 600699 | 2016 | -0.26 | 0.04 | 0.025156 | 0.00063282 | 24.34045 | 0.048781 | 45.95 |
| 300118 | 2016 | -0.3  | 0.04 | 0.025156 | 0.00063282 | 23.02231 | 0.183408 | 32.57 |
| 2048   | 2016 | -0.68 | 0.04 | 0.025156 | 0.00063282 | 23.32742 | 0.179502 | 16.97 |
| 603606 | 2016 | -0.05 | 0.04 | 0.025156 | 0.00063282 | 21.44485 | 0.06074  | 37.06 |
| 603788 | 2016 | 0.229 | 0.04 | 0.025156 | 0.00063282 | 20.85776 | 0.184913 | 42.33 |
| 2119   | 2016 | -0.13 | 0.04 | 0.025156 | 0.00063282 | 20.98794 | 0.067617 | 19.72 |
| 300441 | 2016 | -0.53 | 0.04 | 0.025156 | 0.00063282 | 20.89367 | 0.070406 | 55.4  |
| 2322   | 2016 | 1.492 | 0.04 | 0.025156 | 0.00063282 | 21.90545 | 0.050492 | 31.56 |
| 603015 | 2016 | 0.112 | 0.04 | 0.025156 | 0.00063282 | 21.04752 | 0.041555 | 60.32 |
| 300307 | 2016 | -0.4  | 0.04 | 0.025156 | 0.00063282 | 22.29286 | 0.030405 | 30.95 |
| 601018 | 2016 | -0.98 | 0.04 | 0.025156 | 0.00063282 | 24.4999  | 0.067917 | 74.18 |
| 601137 | 2016 | -0.02 | 0.04 | 0.025156 | 0.00063282 | 22.39491 | 0.075326 | 33.91 |
| 601689 | 2016 | -0.22 | 0.04 | 0.025156 | 0.00063282 | 22.28055 | 0.181284 | 73.7  |
| 300439 | 2016 | 0.151 | 0.04 | 0.025156 | 0.00063282 | 21.5721  | 0.099203 | 50.66 |
| 601689 | 2016 | -0.33 | 0.04 | 0.025156 | 0.00063282 | 22.32192 | 0.181284 | 73.7  |
| 603088 | 2016 | -0.1  | 0.04 | 0.025156 | 0.00063282 | 20.30199 | 0.040279 | 33.08 |
| 600884 | 2016 | -0.87 | 0.04 | 0.025156 | 0.00063282 | 23.40336 | 0.046036 | 23.79 |
| 300307 | 2016 | -0.03 | 0.04 | 0.025156 | 0.00063282 | 22.29286 | 0.030405 | 30.95 |
| 2586   | 2016 | -0.37 | 0.04 | 0.025156 | 0.00063282 | 22.44501 | 0.053077 | 41.49 |
| 2164   | 2016 | -0.08 | 0.04 | 0.025156 | 0.00063282 | 21.26491 | 0.010255 | 31.08 |
| 600884 | 2016 | -0.21 | 0.04 | 0.025156 | 0.00063282 | 23.40336 | 0.046036 | 23.79 |
| 600177 | 2016 | 0.347 | 0.04 | 0.025156 | 0.00063282 | 24.88077 | 0.161079 | 29.01 |
| 601789 | 2016 | -0.56 | 0.04 | 0.025156 | 0.00063282 | 23.29081 | 0.080533 | 39.25 |
| 300100 | 2016 | -0.75 | 0.04 | 0.025156 | 0.00063282 | 22.43234 | 0.136331 | 48.01 |
| 300100 | 2016 | -0.2  | 0.04 | 0.025156 | 0.00063282 | 22.43234 | 0.136331 | 48.01 |
| 2586   | 2016 | -0.26 | 0.04 | 0.025156 | 0.00063282 | 22.44501 | 0.053077 | 41.49 |
| 300100 | 2016 | -0.58 | 0.04 | 0.025156 | 0.00063282 | 22.43234 | 0.136331 | 48.01 |
| 2119   | 2016 | -0.32 | 0.04 | 0.025156 | 0.00063282 | 21.1859  | 0.067617 | 19.72 |



|        |      |       |      |          |            |          |          |        |
|--------|------|-------|------|----------|------------|----------|----------|--------|
| 2048   | 2016 | -0.68 | 0.04 | 0.025156 | 0.00063282 | 23.32742 | 0.179502 | 16.97  |
| 300100 | 2016 | -0.75 | 0.04 | 0.025156 | 0.00063282 | 22.43234 | 0.136331 | 48.01  |
| 601018 | 2016 | -0.98 | 0.04 | 0.025156 | 0.00063282 | 24.78626 | 0.067917 | 74.18  |
| 300307 | 2016 | 0.394 | 0.04 | 0.025156 | 0.00063282 | 22.29572 | 0.030405 | 30.95  |
| 601689 | 2016 | -0.23 | 0.04 | 0.025156 | 0.00063282 | 22.32192 | 0.181284 | 73.7   |
| 603015 | 2016 | 0.486 | 0.04 | 0.025156 | 0.00063282 | 21.04752 | 0.041555 | 60.32  |
| 601689 | 2016 | -0.33 | 0.04 | 0.025156 | 0.00063282 | 22.32192 | 0.181284 | 73.7   |
| 2124   | 2016 | -0.11 | 0.04 | 0.025156 | 0.00063282 | 21.63559 | 0.261678 | 29.73  |
| 600884 | 2016 | -0.22 | 0.04 | 0.025156 | 0.00063282 | 23.40336 | 0.046036 | 23.79  |
| 300307 | 2016 | 0.924 | 0.04 | 0.025156 | 0.00063282 | 22.29286 | 0.030405 | 30.95  |
| 600537 | 2016 | 0.007 | 0.04 | 0.025156 | 0.00063282 | 22.68229 | 0.118439 | 30.361 |
| 300307 | 2016 | 0.179 | 0.04 | 0.025156 | 0.00063282 | 22.29286 | 0.030405 | 30.95  |
| 600114 | 2016 | -0.39 | 0.04 | 0.025156 | 0.00063282 | 21.76384 | 0.074687 | 19.45  |
| 300100 | 2016 | -0.75 | 0.04 | 0.025156 | 0.00063282 | 22.43234 | 0.136331 | 48.01  |
| 300314 | 2016 | -0.2  | 0.04 | 0.025156 | 0.00063282 | 20.54776 | 0.083049 | 24.69  |
| 601789 | 2016 | -0.36 | 0.04 | 0.025156 | 0.00063282 | 23.29081 | 0.080533 | 39.25  |
| 600130 | 2016 | -0.33 | 0.04 | 0.025156 | 0.00063282 | 21.08211 | 0.030957 | 16.4   |
| 600366 | 2016 | 0.138 | 0.04 | 0.025156 | 0.00063282 | 22.46893 | 0.181009 | 31.37  |
| 601689 | 2016 | -0.19 | 0.04 | 0.025156 | 0.00063282 | 22.32192 | 0.181284 | 73.7   |
| 601789 | 2016 | -0.56 | 0.04 | 0.025156 | 0.00063282 | 21.93125 | 0.080533 | 39.25  |
| 600491 | 2016 | -0.3  | 0.04 | 0.025156 | 0.00063282 | 24.03481 | 0.063778 | 35.04  |
| 603015 | 2016 | 0.112 | 0.04 | 0.025156 | 0.00063282 | 21.04752 | 0.041555 | 60.32  |
| 600177 | 2016 | -0.18 | 0.04 | 0.025156 | 0.00063282 | 24.88077 | 0.161079 | 29.01  |
| 2119   | 2016 | -0.32 | 0.04 | 0.025156 | 0.00063282 | 21.1859  | 0.067617 | 19.72  |
| 2124   | 2016 | -0.27 | 0.04 | 0.025156 | 0.00063282 | 21.63559 | 0.261678 | 29.73  |
| 601339 | 2016 | -0.5  | 0.04 | 0.025156 | 0.00063282 | 23.16905 | 0.082913 | 29.72  |
| 600366 | 2016 | 0.613 | 0.04 | 0.025156 | 0.00063282 | 22.46893 | 0.181009 | 31.37  |
| 601789 | 2016 | -0.39 | 0.04 | 0.025156 | 0.00063282 | 23.29081 | 0.080533 | 39.25  |
| 300076 | 2016 | 0.551 | 0.04 | 0.025156 | 0.00063282 | 20.85152 | -0.0205  | 30.02  |
| 600366 | 2016 | 0.282 | 0.04 | 0.025156 | 0.00063282 | 22.46893 | 0.181009 | 31.37  |
| 2586   | 2016 | 0.517 | 0.04 | 0.025156 | 0.00063282 | 22.44501 | 0.053077 | 41.49  |
| 600366 | 2016 | 0.613 | 0.04 | 0.025156 | 0.00063282 | 22.46893 | 0.181009 | 31.37  |
| 601137 | 2016 | 0.129 | 0.04 | 0.025156 | 0.00063282 | 22.39491 | 0.075326 | 33.91  |
| 2048   | 2016 | -0.36 | 0.04 | 0.025156 | 0.00063282 | 23.32742 | 0.179502 | 16.97  |
| 601339 | 2016 | -0.5  | 0.04 | 0.025156 | 0.00063282 | 23.16905 | 0.082913 | 29.72  |
| 603015 | 2016 | 1.24  | 0.04 | 0.025156 | 0.00063282 | 21.04752 | 0.041555 | 60.32  |
| 600114 | 2016 | -0.26 | 0.04 | 0.025156 | 0.00063282 | 21.63952 | 0.074687 | 19.45  |
| 601137 | 2016 | -0.1  | 0.04 | 0.025156 | 0.00063282 | 22.39491 | 0.075326 | 33.91  |
| 600537 | 2016 | 0.007 | 0.04 | 0.025156 | 0.00063282 | 22.68229 | 0.118439 | 30.361 |
| 300439 | 2016 | 0.879 | 0.04 | 0.025156 | 0.00063282 | 21.95239 | 0.099203 | 50.66  |
| 2120   | 2016 | -0.44 | 0.04 | 0.025156 | 0.00063282 | 22.62677 | 0.302158 | 56.53  |
| 600114 | 2016 | -0.52 | 0.04 | 0.025156 | 0.00063282 | 21.76384 | 0.074687 | 19.45  |
| 603788 | 2016 | 0.229 | 0.04 | 0.025156 | 0.00063282 | 20.89493 | 0.184913 | 42.33  |
| 300307 | 2016 | 0.924 | 0.04 | 0.025156 | 0.00063282 | 22.29286 | 0.030405 | 30.95  |
| 601789 | 2016 | -0.52 | 0.04 | 0.025156 | 0.00063282 | 23.29081 | 0.080533 | 39.25  |
| 600152 | 2016 | -0.9  | 0.04 | 0.025156 | 0.00063282 | 20.77514 | -0.12213 | 22.27  |
| 600177 | 2016 | 0.347 | 0.04 | 0.025156 | 0.00063282 | 24.88077 | 0.161079 | 29.01  |
| 300441 | 2016 | -0.4  | 0.04 | 0.025156 | 0.00063282 | 21.06688 | 0.070406 | 55.4   |
| 300441 | 2016 | -0.08 | 0.04 | 0.025156 | 0.00063282 | 21.06688 | 0.070406 | 55.4   |
| 300439 | 2016 | -0.24 | 0.04 | 0.025156 | 0.00063282 | 21.95239 | 0.099203 | 50.66  |
| 600152 | 2016 | -0.78 | 0.04 | 0.025156 | 0.00063282 | 20.77514 | -0.12213 | 22.27  |
| 2062   | 2016 | -0.18 | 0.04 | 0.025156 | 0.00063282 | 23.31451 | 0.082047 | 44.93  |
| 603997 | 2016 | -0.33 | 0.04 | 0.025156 | 0.00063282 | 21.38261 | 0.162414 | 49.54  |
| 2048   | 2016 | -0.68 | 0.04 | 0.025156 | 0.00063282 | 23.32742 | 0.179502 | 16.97  |

|        |      |       |      |          |            |          |          |       |
|--------|------|-------|------|----------|------------|----------|----------|-------|
| 600491 | 2016 | -0.3  | 0.04 | 0.025156 | 0.00063282 | 24.03481 | 0.063778 | 35.04 |
| 601689 | 2016 | -0.36 | 0.04 | 0.025156 | 0.00063282 | 22.32192 | 0.181284 | 73.7  |
| 2120   | 2016 | -0.16 | 0.04 | 0.025156 | 0.00063282 | 22.62677 | 0.302158 | 56.53 |
| 300163 | 2016 | -0.28 | 0.04 | 0.025156 | 0.00063282 | 20.93028 | 0.094146 | 36.49 |
| 2124   | 2016 | 0.144 | 0.04 | 0.025156 | 0.00063282 | 21.38715 | 0.261678 | 29.73 |
| 601789 | 2016 | -0.83 | 0.04 | 0.025156 | 0.00063282 | 23.29081 | 0.080533 | 39.25 |
| 600366 | 2016 | 0.556 | 0.04 | 0.025156 | 0.00063282 | 22.46893 | 0.181009 | 31.37 |
| 300439 | 2016 | 0.879 | 0.04 | 0.025156 | 0.00063282 | 21.95239 | 0.099203 | 50.66 |
| 601137 | 2016 | 0.129 | 0.04 | 0.025156 | 0.00063282 | 22.39491 | 0.075326 | 33.91 |
| 300100 | 2016 | -0.56 | 0.04 | 0.025156 | 0.00063282 | 22.43234 | 0.136331 | 48.01 |
| 300314 | 2016 | -0.44 | 0.04 | 0.025156 | 0.00063282 | 20.54776 | 0.083049 | 24.69 |
| 600884 | 2016 | -0.44 | 0.04 | 0.025156 | 0.00063282 | 23.40336 | 0.046036 | 23.79 |
| 300314 | 2016 | -0.2  | 0.04 | 0.025156 | 0.00063282 | 20.54776 | 0.083049 | 24.69 |
| 601339 | 2016 | -0.5  | 0.04 | 0.025156 | 0.00063282 | 23.16905 | 0.082913 | 29.72 |
| 2473   | 2016 | -0.72 | 0.04 | 0.025156 | 0.00063282 | 20.10336 | -0.1017  | 18.13 |
| 600366 | 2016 | 0.521 | 0.04 | 0.025156 | 0.00063282 | 22.46893 | 0.181009 | 31.37 |
| 600884 | 2016 | -0.05 | 0.04 | 0.025156 | 0.00063282 | 23.40336 | 0.046036 | 23.79 |
| 2119   | 2016 | -0.32 | 0.04 | 0.025156 | 0.00063282 | 21.1859  | 0.067617 | 19.72 |
| 600884 | 2016 | 0.397 | 0.04 | 0.025156 | 0.00063282 | 23.40336 | 0.046036 | 23.79 |
| 2119   | 2016 | -0.21 | 0.04 | 0.025156 | 0.00063282 | 21.1859  | 0.067617 | 19.72 |
| 603997 | 2016 | -0.33 | 0.04 | 0.025156 | 0.00063282 | 21.33353 | 0.162414 | 49.54 |
| 2120   | 2016 | -0.05 | 0.04 | 0.025156 | 0.00063282 | 22.62677 | 0.302158 | 56.53 |
| 2120   | 2016 | -0.93 | 0.04 | 0.025156 | 0.00063282 | 22.62677 | 0.302158 | 56.53 |
| 600366 | 2016 | 0.067 | 0.04 | 0.025156 | 0.00063282 | 22.46893 | 0.181009 | 31.37 |
| 2048   | 2016 | -0.5  | 0.04 | 0.025156 | 0.00063282 | 23.32742 | 0.179502 | 16.97 |
| 600884 | 2016 | -0.54 | 0.04 | 0.025156 | 0.00063282 | 23.40336 | 0.046036 | 23.79 |
| 2103   | 2016 | -0.5  | 0.04 | 0.025156 | 0.00063282 | 21.68541 | 0.068734 | 22.13 |
| 2586   | 2016 | -0.81 | 0.04 | 0.025156 | 0.00063282 | 22.44501 | 0.053077 | 41.49 |
| 300100 | 2016 | -0.64 | 0.04 | 0.025156 | 0.00063282 | 22.43234 | 0.136331 | 48.01 |
| 601789 | 2016 | -0.5  | 0.04 | 0.025156 | 0.00063282 | 23.29081 | 0.080533 | 39.25 |
| 600366 | 2016 | -0.54 | 0.04 | 0.025156 | 0.00063282 | 22.46893 | 0.181009 | 31.37 |
| 2048   | 2016 | -0.68 | 0.04 | 0.025156 | 0.00063282 | 23.32742 | 0.179502 | 16.97 |
| 2119   | 2016 | -0.13 | 0.04 | 0.025156 | 0.00063282 | 21.1859  | 0.067617 | 19.72 |
| 601339 | 2016 | -0.5  | 0.04 | 0.025156 | 0.00063282 | 22.94734 | 0.082913 | 29.72 |
| 600699 | 2016 | 0.442 | 0.04 | 0.025156 | 0.00063282 | 24.34045 | 0.048781 | 45.95 |
| 300439 | 2016 | 0.151 | 0.04 | 0.025156 | 0.00063282 | 21.95239 | 0.099203 | 50.66 |
| 603997 | 2016 | -0.33 | 0.04 | 0.025156 | 0.00063282 | 21.38261 | 0.162414 | 49.54 |
| 2473   | 2016 | -0.72 | 0.04 | 0.025156 | 0.00063282 | 20.10336 | -0.1017  | 18.13 |
| 2048   | 2016 | -0.68 | 0.04 | 0.025156 | 0.00063282 | 23.32742 | 0.179502 | 16.97 |
| 600884 | 2016 | -0.59 | 0.04 | 0.025156 | 0.00063282 | 23.1058  | 0.046036 | 23.79 |
| 601689 | 2016 | -0.28 | 0.04 | 0.025156 | 0.00063282 | 22.32192 | 0.181284 | 73.7  |
| 300314 | 2016 | -0.07 | 0.04 | 0.025156 | 0.00063282 | 20.58409 | 0.083049 | 24.69 |
| 603015 | 2016 | 0.48  | 0.04 | 0.025156 | 0.00063282 | 21.04752 | 0.041555 | 60.32 |
| 601018 | 2016 | -0.98 | 0.04 | 0.025156 | 0.00063282 | 24.78626 | 0.067917 | 74.18 |
| 600366 | 2016 | 0.442 | 0.04 | 0.025156 | 0.00063282 | 22.46893 | 0.181009 | 31.37 |
| 603015 | 2016 | 0.112 | 0.04 | 0.025156 | 0.00063282 | 21.04752 | 0.041555 | 60.32 |
| 300076 | 2016 | 1.001 | 0.04 | 0.025156 | 0.00063282 | 20.9803  | -0.0205  | 30.02 |
| 603606 | 2016 | -0.05 | 0.04 | 0.025156 | 0.00063282 | 21.44485 | 0.06074  | 37.06 |
| 600177 | 2016 | 0.016 | 0.04 | 0.025156 | 0.00063282 | 24.31597 | 0.161079 | 29.01 |
| 600491 | 2016 | -0.3  | 0.04 | 0.025156 | 0.00063282 | 24.03481 | 0.063778 | 35.04 |
| 300100 | 2016 | -0.64 | 0.04 | 0.025156 | 0.00063282 | 22.43234 | 0.136331 | 48.01 |
| 2473   | 2016 | -0.72 | 0.04 | 0.025156 | 0.00063282 | 20.10336 | -0.1017  | 18.13 |
| 2473   | 2016 | -0.72 | 0.04 | 0.025156 | 0.00063282 | 20.10336 | -0.1017  | 18.13 |
| 300100 | 2016 | -0.2  | 0.04 | 0.025156 | 0.00063282 | 22.43234 | 0.136331 | 48.01 |

|        |      |       |      |          |            |          |          |       |
|--------|------|-------|------|----------|------------|----------|----------|-------|
| 600114 | 2016 | -0.26 | 0.04 | 0.025156 | 0.00063282 | 21.76384 | 0.074687 | 19.45 |
| 600366 | 2016 | -0.14 | 0.04 | 0.025156 | 0.00063282 | 22.46893 | 0.181009 | 31.37 |
| 2103   | 2016 | -0.19 | 0.04 | 0.025156 | 0.00063282 | 21.68541 | 0.068734 | 22.13 |
| 600114 | 2016 | -0.41 | 0.04 | 0.025156 | 0.00063282 | 21.76384 | 0.074687 | 19.45 |
| 600152 | 2016 | -0.9  | 0.04 | 0.025156 | 0.00063282 | 20.77514 | -0.12213 | 22.27 |
| 600152 | 2016 | -0.9  | 0.04 | 0.025156 | 0.00063282 | 21.03642 | -0.12213 | 22.27 |
| 600152 | 2016 | -0.62 | 0.04 | 0.025156 | 0.00063282 | 20.77514 | -0.12213 | 22.27 |
| 600884 | 2016 | -0.55 | 0.04 | 0.025156 | 0.00063282 | 23.40336 | 0.046036 | 23.79 |
| 603606 | 2016 | -0.05 | 0.04 | 0.025156 | 0.00063282 | 21.4304  | 0.06074  | 37.06 |
| 600177 | 2016 | 0.347 | 0.04 | 0.025156 | 0.00063282 | 24.88077 | 0.161079 | 29.01 |
| 601339 | 2016 | -0.5  | 0.04 | 0.025156 | 0.00063282 | 23.16905 | 0.082913 | 29.72 |
| 600699 | 2016 | -0.09 | 0.04 | 0.025156 | 0.00063282 | 24.34045 | 0.048781 | 45.95 |
| 600177 | 2016 | -0.18 | 0.04 | 0.025156 | 0.00063282 | 24.88077 | 0.161079 | 29.01 |
| 300439 | 2016 | -0.24 | 0.04 | 0.025156 | 0.00063282 | 21.95239 | 0.099203 | 50.66 |
| 603788 | 2016 | 0.229 | 0.04 | 0.025156 | 0.00063282 | 20.89493 | 0.184913 | 42.33 |
| 603606 | 2016 | -0.05 | 0.04 | 0.025156 | 0.00063282 | 21.44485 | 0.06074  | 37.06 |
| 600366 | 2016 | 0.115 | 0.04 | 0.025156 | 0.00063282 | 22.46893 | 0.181009 | 31.37 |
| 601567 | 2016 | 0.506 | 0.04 | 0.025156 | 0.00063282 | 22.81865 | 0.114326 | 32.26 |
| 600884 | 2016 | 0.268 | 0.04 | 0.025156 | 0.00063282 | 23.40336 | 0.046036 | 23.79 |
| 600130 | 2016 | -0.33 | 0.04 | 0.025156 | 0.00063282 | 20.69098 | 0.030957 | 16.4  |
| 300076 | 2016 | 0.776 | 0.04 | 0.025156 | 0.00063282 | 20.85152 | -0.0205  | 30.02 |
| 600366 | 2016 | 0.613 | 0.04 | 0.025156 | 0.00063282 | 22.46893 | 0.181009 | 31.37 |
| 2164   | 2016 | -0.21 | 0.04 | 0.025156 | 0.00063282 | 21.26491 | 0.010255 | 31.08 |
| 600114 | 2016 | -0.52 | 0.04 | 0.025156 | 0.00063282 | 21.76384 | 0.074687 | 19.45 |
| 601567 | 2016 | 0.22  | 0.04 | 0.025156 | 0.00063282 | 23.17742 | 0.114326 | 32.26 |
| 600130 | 2016 | -0.3  | 0.04 | 0.025156 | 0.00063282 | 21.08211 | 0.030957 | 16.4  |
| 603015 | 2016 | 0.112 | 0.04 | 0.025156 | 0.00063282 | 21.04752 | 0.041555 | 60.32 |
| 2164   | 2016 | 0.005 | 0.04 | 0.025156 | 0.00063282 | 21.00149 | 0.010255 | 31.08 |
| 600366 | 2016 | 0.117 | 0.04 | 0.025156 | 0.00063282 | 22.46893 | 0.181009 | 31.37 |
| 603088 | 2016 | -0.1  | 0.04 | 0.025156 | 0.00063282 | 20.30199 | 0.040279 | 33.08 |
| 2322   | 2016 | 1.051 | 0.04 | 0.025156 | 0.00063282 | 21.90545 | 0.050492 | 31.56 |
| 2322   | 2016 | 1.051 | 0.04 | 0.025156 | 0.00063282 | 21.90545 | 0.050492 | 31.56 |
| 600884 | 2016 | -0.87 | 0.04 | 0.025156 | 0.00063282 | 23.40336 | 0.046036 | 23.79 |
| 600130 | 2016 | -0.33 | 0.04 | 0.025156 | 0.00063282 | 21.08211 | 0.030957 | 16.4  |
| 600130 | 2016 | -0.33 | 0.04 | 0.025156 | 0.00063282 | 21.08211 | 0.030957 | 16.4  |
| 600130 | 2016 | -0.41 | 0.04 | 0.025156 | 0.00063282 | 21.08211 | 0.030957 | 16.4  |
| 600884 | 2016 | 0.457 | 0.04 | 0.025156 | 0.00063282 | 23.40336 | 0.046036 | 23.79 |
| 603015 | 2016 | 0.348 | 0.04 | 0.025156 | 0.00063282 | 21.04752 | 0.041555 | 60.32 |
| 600114 | 2016 | -0.41 | 0.04 | 0.025156 | 0.00063282 | 21.76384 | 0.074687 | 19.45 |
| 600366 | 2016 | -0.54 | 0.04 | 0.025156 | 0.00063282 | 22.46893 | 0.181009 | 31.37 |
| 2586   | 2016 | -0.81 | 0.04 | 0.025156 | 0.00063282 | 22.44501 | 0.053077 | 41.49 |
| 600114 | 2016 | -0.03 | 0.04 | 0.025156 | 0.00063282 | 21.76384 | 0.074687 | 19.45 |
| 300090 | 2016 | -0.36 | 0.03 | 0.184381 | 0.03399639 | 23.21044 | 0.022893 | 13.69 |
| 850    | 2016 | -0.08 | 0.03 | 0.184381 | 0.03399639 | 22.77681 | 0.013576 | 46.4  |
| 850    | 2016 | -0.19 | 0.03 | 0.184381 | 0.03399639 | 22.77681 | 0.013576 | 46.4  |
| 850    | 2016 | -0.17 | 0.03 | 0.184381 | 0.03399639 | 22.77681 | 0.013576 | 46.4  |
| 300090 | 2016 | -0.37 | 0.03 | 0.184381 | 0.03399639 | 23.21044 | 0.022893 | 13.69 |
| 850    | 2016 | -0.18 | 0.03 | 0.184381 | 0.03399639 | 22.77681 | 0.013576 | 46.4  |
| 300090 | 2016 | -0.37 | 0.03 | 0.184381 | 0.03399639 | 22.90534 | 0.022893 | 13.69 |
| 300090 | 2016 | -0.64 | 0.03 | 0.184381 | 0.03399639 | 23.21044 | 0.022893 | 13.69 |
| 850    | 2016 | -0.19 | 0.03 | 0.184381 | 0.03399639 | 22.77681 | 0.013576 | 46.4  |
| 300090 | 2016 | -0.26 | 0.03 | 0.184381 | 0.03399639 | 23.21044 | 0.022893 | 13.69 |
| 300090 | 2016 | -0.23 | 0.03 | 0.184381 | 0.03399639 | 23.21044 | 0.022893 | 13.69 |
| 300090 | 2016 | -0.49 | 0.03 | 0.184381 | 0.03399639 | 23.21044 | 0.022893 | 13.69 |

|        |      |       |      |          |            |          |          |       |
|--------|------|-------|------|----------|------------|----------|----------|-------|
| 300090 | 2016 | -0.23 | 0.03 | 0.184381 | 0.03399639 | 23.21044 | 0.022893 | 13.69 |
| 300090 | 2016 | -0.23 | 0.03 | 0.184381 | 0.03399639 | 23.21044 | 0.022893 | 13.69 |
| 850    | 2016 | -0.18 | 0.03 | 0.184381 | 0.03399639 | 22.77681 | 0.013576 | 46.4  |
| 850    | 2016 | -0.08 | 0.03 | 0.184381 | 0.03399639 | 22.77681 | 0.013576 | 46.4  |
| 850    | 2016 | -0.12 | 0.03 | 0.184381 | 0.03399639 | 22.72127 | 0.013576 | 46.4  |
| 850    | 2016 | -0.25 | 0.03 | 0.184381 | 0.03399639 | 22.77681 | 0.013576 | 46.4  |
| 300090 | 2016 | -0.23 | 0.03 | 0.184381 | 0.03399639 | 23.21044 | 0.022893 | 13.69 |
| 600569 | 2016 | -0.2  | 0.03 | 1.374934 | 1.8904444  | 24.20176 | 0.019582 | 60.14 |
| 600207 | 2016 | -0.96 | 0.03 | 1.374934 | 1.8904444  | 21.59478 | 0.007538 | 47.26 |
| 2535   | 2016 | -0.56 | 0.03 | 1.374934 | 1.8904444  | 22.61529 | 0.00489  | 29.63 |
| 600207 | 2016 | -0.96 | 0.03 | 1.374934 | 1.8904444  | 21.5959  | 0.007538 | 47.26 |
| 600207 | 2016 | -0.59 | 0.03 | 1.374934 | 1.8904444  | 21.59478 | 0.007538 | 47.26 |
| 600569 | 2016 | -0.2  | 0.03 | 1.374934 | 1.8904444  | 24.20176 | 0.019582 | 60.14 |
| 600207 | 2016 | -0.52 | 0.03 | 1.374934 | 1.8904444  | 21.59478 | 0.007538 | 47.26 |
| 600207 | 2016 | -0.52 | 0.03 | 1.374934 | 1.8904444  | 21.59478 | 0.007538 | 47.26 |
| 600207 | 2016 | -0.96 | 0.03 | 1.374934 | 1.8904444  | 21.59478 | 0.007538 | 47.26 |
| 600569 | 2016 | -0.2  | 0.03 | 1.374934 | 1.8904444  | 24.15084 | 0.019582 | 60.14 |
| 2535   | 2016 | -0.76 | 0.03 | 1.374934 | 1.8904444  | 22.61651 | 0.00489  | 29.63 |
| 600207 | 2016 | -0.96 | 0.03 | 1.374934 | 1.8904444  | 21.59478 | 0.007538 | 47.26 |
| 2535   | 2016 | -0.76 | 0.03 | 1.374934 | 1.8904444  | 22.61529 | 0.00489  | 29.63 |
| 2535   | 2016 | -0.76 | 0.03 | 1.374934 | 1.8904444  | 22.61529 | 0.00489  | 29.63 |
| 2535   | 2016 | -0.76 | 0.03 | 1.374934 | 1.8904444  | 22.61529 | 0.00489  | 29.63 |
| 2535   | 2016 | -0.76 | 0.03 | 1.374934 | 1.8904444  | 22.61529 | 0.00489  | 29.63 |
| 2535   | 2016 | -0.76 | 0.03 | 1.374934 | 1.8904444  | 22.61529 | 0.00489  | 29.63 |
| 2535   | 2016 | -0.76 | 0.03 | 1.374934 | 1.8904444  | 22.61529 | 0.00489  | 29.63 |
| 2535   | 2016 | -0.76 | 0.03 | 1.374934 | 1.8904444  | 22.61529 | 0.00489  | 29.63 |
| 2535   | 2016 | -0.56 | 0.03 | 1.374934 | 1.8904444  | 22.61529 | 0.00489  | 29.63 |
| 2535   | 2016 | -0.58 | 0.03 | 1.374934 | 1.8904444  | 22.61529 | 0.00489  | 29.63 |
| 826    | 2016 | -0.84 | 0.05 | 0.151718 | 0.02301835 | 23.59943 | 0.129437 | 19.81 |
| 600141 | 2016 | -0.2  | 0.05 | 0.151718 | 0.02301835 | 23.78576 | 0.025726 | 24.22 |
| 600298 | 2016 | 0.002 | 0.05 | 0.151718 | 0.02301835 | 22.58645 | 0.165128 | 39.98 |
| 422    | 2016 | 0.366 | 0.05 | 0.151718 | 0.02301835 | 24.40645 | -0.20683 | 17.08 |
| 600141 | 2016 | -0.34 | 0.05 | 0.151718 | 0.02301835 | 23.78576 | 0.025726 | 24.22 |
| 422    | 2016 | -0.33 | 0.05 | 0.151718 | 0.02301835 | 24.40645 | -0.20683 | 17.08 |
| 600141 | 2016 | -0.85 | 0.05 | 0.151718 | 0.02301835 | 23.78576 | 0.025726 | 24.22 |
| 600298 | 2016 | -0.73 | 0.05 | 0.151718 | 0.02301835 | 22.63691 | 0.165128 | 39.98 |
| 826    | 2016 | -0.84 | 0.05 | 0.151718 | 0.02301835 | 23.85631 | 0.129437 | 19.81 |
| 826    | 2016 | -0.84 | 0.05 | 0.151718 | 0.02301835 | 23.85631 | 0.129437 | 19.81 |
| 826    | 2016 | -0.35 | 0.05 | 0.151718 | 0.02301835 | 23.59943 | 0.129437 | 19.81 |
| 600141 | 2016 | 0.252 | 0.05 | 0.151718 | 0.02301835 | 23.78576 | 0.025726 | 24.22 |
| 422    | 2016 | -0.63 | 0.05 | 0.151718 | 0.02301835 | 24.40645 | -0.20683 | 17.08 |
| 600141 | 2016 | -0.6  | 0.05 | 0.151718 | 0.02301835 | 23.78576 | 0.025726 | 24.22 |
| 826    | 2016 | -0.54 | 0.05 | 0.151718 | 0.02301835 | 23.85631 | 0.129437 | 19.81 |
| 600298 | 2016 | 0.002 | 0.05 | 0.151718 | 0.02301835 | 22.63691 | 0.165128 | 39.98 |
| 600298 | 2016 | 0.002 | 0.05 | 0.151718 | 0.02301835 | 22.63691 | 0.165128 | 39.98 |
| 600298 | 2016 | 0.002 | 0.05 | 0.151718 | 0.02301835 | 22.63691 | 0.165128 | 39.98 |
| 600298 | 2016 | 0.591 | 0.05 | 0.151718 | 0.02301835 | 22.63691 | 0.165128 | 39.98 |
| 600141 | 2016 | -0.19 | 0.05 | 0.151718 | 0.02301835 | 23.78576 | 0.025726 | 24.22 |
| 600141 | 2016 | -0.85 | 0.05 | 0.151718 | 0.02301835 | 23.78576 | 0.025726 | 24.22 |
| 600141 | 2016 | -0.46 | 0.05 | 0.151718 | 0.02301835 | 23.38667 | 0.025726 | 24.22 |
| 600141 | 2016 | -0.43 | 0.05 | 0.151718 | 0.02301835 | 23.78576 | 0.025726 | 24.22 |
| 600298 | 2016 | -0.18 | 0.05 | 0.151718 | 0.02301835 | 22.63691 | 0.165128 | 39.98 |
| 826    | 2016 | -0.27 | 0.05 | 0.151718 | 0.02301835 | 23.85631 | 0.129437 | 19.81 |
| 600141 | 2016 | -0.47 | 0.05 | 0.151718 | 2.30E-02   | 23.78576 | 0.025726 | 24.22 |
| 600298 | 2016 | 0.525 | 0.05 | 0.151718 | 2.30E-02   | 22.63691 | 0.165128 | 39.98 |

|        |      |       |      |          |            |          |          |       |
|--------|------|-------|------|----------|------------|----------|----------|-------|
| 422    | 2016 | -0.63 | 0.05 | 0.151718 | 2.30E-02   | 24.40645 | -0.20683 | 17.08 |
| 422    | 2016 | -0.41 | 0.05 | 0.151718 | 2.30E-02   | 24.40645 | -0.20683 | 17.08 |
| 826    | 2016 | -0.27 | 0.05 | 0.151718 | 2.30E-02   | 23.85631 | 0.129437 | 19.81 |
| 422    | 2016 | -0.82 | 0.05 | 0.151718 | 2.30E-02   | 24.40645 | -0.20683 | 17.08 |
| 422    | 2016 | -0.63 | 0.05 | 0.151718 | 2.30E-02   | 24.40645 | -0.20683 | 17.08 |
| 600141 | 2016 | -0.2  | 0.05 | 0.151718 | 0.02301835 | 23.78576 | 0.025726 | 24.22 |
| 600298 | 2016 | 0.277 | 0.05 | 0.151718 | 0.02301835 | 22.63691 | 0.165128 | 39.98 |
| 826    | 2016 | -0.84 | 0.05 | 0.151718 | 0.02301835 | 23.85631 | 0.129437 | 19.81 |
| 826    | 2016 | -0.35 | 0.05 | 0.151718 | 0.02301835 | 23.85631 | 0.129437 | 19.81 |
| 826    | 2016 | -0.64 | 0.05 | 0.151718 | 0.02301835 | 23.85631 | 0.129437 | 19.81 |
| 422    | 2016 | 0.16  | 0.05 | 0.151718 | 0.02301835 | 24.40645 | -0.20683 | 17.08 |
| 422    | 2016 | -0.82 | 0.05 | 0.151718 | 0.02301835 | 24.40645 | -0.20683 | 17.08 |
| 422    | 2016 | -0.82 | 0.05 | 0.151718 | 0.02301835 | 23.72227 | -0.20683 | 17.08 |
| 600141 | 2016 | -0.85 | 0.05 | 0.151718 | 0.02301835 | 23.78576 | 0.025726 | 24.22 |
| 826    | 2016 | -0.36 | 0.05 | 0.151718 | 0.02301835 | 23.85631 | 0.129437 | 19.81 |
| 422    | 2016 | -0.26 | 0.05 | 0.151718 | 0.02301835 | 24.40645 | -0.20683 | 17.08 |
| 826    | 2016 | -0.84 | 0.05 | 0.151718 | 0.02301835 | 23.85631 | 0.129437 | 19.81 |
| 600141 | 2016 | -0.85 | 0.05 | 0.151718 | 0.02301835 | 23.78576 | 0.025726 | 24.22 |
| 600298 | 2016 | 0.525 | 0.05 | 0.151718 | 0.02301835 | 22.63691 | 0.165128 | 39.98 |
| 826    | 2016 | -0.53 | 0.05 | 0.151718 | 0.02301835 | 23.85631 | 0.129437 | 19.81 |
| 2176   | 2016 | -0.04 | 0.02 | 1.39342  | 1.9416184  | 22.77026 | 0.052982 | 16.4  |
| 300095 | 2016 | 0.816 | 0.02 | 1.39342  | 1.9416184  | 21.47482 | 0.042628 | 26.06 |
| 300095 | 2016 | -0.34 | 0.02 | 1.39342  | 1.9416184  | 21.47482 | 0.042628 | 26.06 |
| 2176   | 2016 | -0.18 | 0.02 | 1.39342  | 1.9416184  | 22.77026 | 0.052982 | 16.4  |
| 300095 | 2016 | -0.22 | 0.02 | 1.39342  | 1.9416184  | 21.47482 | 0.042628 | 26.06 |
| 300095 | 2016 | -0.45 | 0.02 | 1.39342  | 1.9416184  | 21.47482 | 0.042628 | 26.06 |
| 300095 | 2016 | -0.31 | 0.02 | 1.39342  | 1.9416184  | 21.47482 | 0.042628 | 26.06 |
| 300095 | 2016 | -0.34 | 0.02 | 1.39342  | 1.9416184  | 21.41478 | 0.042628 | 26.06 |
| 300095 | 2016 | -0.51 | 0.02 | 1.39342  | 1.9416184  | 21.47482 | 0.042628 | 26.06 |
| 2176   | 2016 | -0.3  | 0.02 | 1.39342  | 1.9416184  | 22.77026 | 0.052982 | 16.4  |
| 2176   | 2016 | 0.752 | 0.02 | 1.39342  | 1.9416184  | 22.77026 | 0.052982 | 16.4  |
| 2176   | 2016 | -0.33 | 0.02 | 1.39342  | 1.9416184  | 22.77026 | 0.052982 | 16.4  |
| 300095 | 2016 | -0.22 | 0.02 | 1.39342  | 1.9416184  | 21.47482 | 0.042628 | 26.06 |
| 2176   | 2016 | -0.18 | 0.02 | 1.39342  | 1.9416184  | 22.77026 | 0.052982 | 16.4  |
| 2176   | 2016 | -0.01 | 0.02 | 1.39342  | 1.94E+00   | 22.53822 | 0.052982 | 16.4  |
| 2176   | 2016 | -0.24 | 0.02 | 1.39342  | 1.94E+00   | 22.77026 | 0.052982 | 16.4  |
| 300095 | 2016 | -0.31 | 0.02 | 1.39342  | 1.94E+00   | 21.47482 | 0.042628 | 26.06 |
| 2176   | 2016 | -0.33 | 0.02 | 1.39342  | 1.94E+00   | 22.77026 | 0.052982 | 16.4  |
| 300095 | 2016 | 0.154 | 0.02 | 1.39342  | 1.94E+00   | 21.47482 | 0.042628 | 26.06 |
| 2176   | 2016 | -0.18 | 0.02 | 1.39342  | 1.9416184  | 22.77026 | 0.052982 | 16.4  |
| 561    | 2016 | 0.557 | 0.03 | 0.096004 | 0.00921669 | 21.41346 | 0.084703 | 42.31 |
| 837    | 2016 | 0.077 | 0.03 | 0.096004 | 0.00921669 | 22.78011 | 0.006362 | 15.94 |
| 561    | 2016 | 0.778 | 0.03 | 0.096004 | 0.00921669 | 21.55985 | 0.084703 | 42.31 |
| 561    | 2016 | 1.264 | 0.03 | 0.096004 | 0.00921669 | 21.55985 | 0.084703 | 42.31 |
| 561    | 2016 | 0.505 | 0.03 | 0.096004 | 0.00921669 | 21.55985 | 0.084703 | 42.31 |
| 837    | 2016 | 0.081 | 0.03 | 0.096004 | 0.00921669 | 22.78011 | 0.006362 | 15.94 |
| 837    | 2016 | -0.58 | 0.03 | 0.096004 | 0.00921669 | 22.78011 | 0.006362 | 15.94 |
| 600379 | 2016 | -0.64 | 0.03 | 0.096004 | 0.00921669 | 20.36173 | 0.07698  | 21.97 |
| 600456 | 2016 | 0.516 | 0.03 | 0.096004 | 0.00921669 | 22.66    | 0.010431 | 56.04 |
| 837    | 2016 | -0.07 | 0.03 | 0.096004 | 0.00921669 | 22.78011 | 0.006362 | 15.94 |
| 600456 | 2016 | 0.516 | 0.03 | 0.096004 | 0.00921669 | 22.56816 | 0.010431 | 56.04 |
| 837    | 2016 | 0.077 | 0.03 | 0.096004 | 0.00921669 | 22.78011 | 0.006362 | 15.94 |
| 600379 | 2016 | -0.64 | 0.03 | 0.096004 | 0.00921669 | 20.36173 | 0.07698  | 21.97 |
| 600379 | 2016 | -0.49 | 0.03 | 0.096004 | 0.00921669 | 20.36173 | 0.07698  | 21.97 |

|        |      |       |      |          |            |          |          |       |
|--------|------|-------|------|----------|------------|----------|----------|-------|
| 837    | 2016 | -0.14 | 0.03 | 0.096004 | 0.00921669 | 22.78011 | 0.006362 | 15.94 |
| 837    | 2016 | -0.58 | 0.03 | 0.096004 | 0.00921669 | 22.21267 | 0.006362 | 15.94 |
| 600456 | 2016 | 0.516 | 0.03 | 0.096004 | 0.00921669 | 22.66    | 0.010431 | 56.04 |
| 837    | 2016 | -0.2  | 0.03 | 0.096004 | 0.00921669 | 22.78011 | 0.006362 | 15.94 |
| 561    | 2016 | 0.115 | 0.03 | 0.096004 | 0.00921669 | 21.55985 | 0.084703 | 42.31 |
| 561    | 2016 | 0.505 | 0.03 | 0.096004 | 0.00921669 | 21.55985 | 0.084703 | 42.31 |
| 837    | 2016 | -0.17 | 0.03 | 0.096004 | 0.00921669 | 22.78011 | 0.006362 | 15.94 |
| 561    | 2016 | 0.778 | 0.03 | 0.096004 | 0.00921669 | 21.55985 | 0.084703 | 42.31 |
| 837    | 2016 | -0.58 | 0.03 | 0.096004 | 0.00921669 | 22.78011 | 0.006362 | 15.94 |
| 600379 | 2016 | -0.31 | 0.03 | 0.096004 | 0.00921669 | 20.31086 | 0.07698  | 21.97 |
| 600379 | 2016 | -0.31 | 0.03 | 0.096004 | 0.00921669 | 20.36173 | 0.07698  | 21.97 |
| 561    | 2016 | 0.652 | 0.03 | 0.096004 | 0.00921669 | 21.55985 | 0.084703 | 42.31 |
| 600456 | 2016 | 0.516 | 0.03 | 0.096004 | 0.00921669 | 22.66    | 0.010431 | 56.04 |
| 600456 | 2016 | 0.516 | 0.03 | 0.096004 | 0.00921669 | 22.66    | 0.010431 | 56.04 |
| 837    | 2016 | -0.58 | 0.03 | 0.096004 | 0.00921669 | 22.78011 | 0.006362 | 15.94 |
| 600456 | 2016 | 0.516 | 0.03 | 0.096004 | 0.00921669 | 22.66    | 0.010431 | 56.04 |
| 600456 | 2016 | 0.516 | 0.03 | 0.096004 | 0.00921669 | 22.66    | 0.010431 | 56.04 |
| 837    | 2016 | -0.58 | 0.03 | 0.096004 | 0.00921669 | 22.78011 | 0.006362 | 15.94 |
| 561    | 2016 | 0.115 | 0.03 | 0.096004 | 0.00921669 | 21.55985 | 0.084703 | 42.31 |
| 887    | 2016 | -0.09 | 0.03 | 0.163071 | 0.02659208 | 23.19689 | 0.140191 | 44.33 |
| 887    | 2016 | -0.09 | 0.03 | 0.163071 | 0.02659208 | 23.19689 | 0.140191 | 44.33 |
| 300475 | 2016 | 0.641 | 0.03 | 0.163071 | 0.02659208 | 21.09578 | 0.084412 | 27.47 |
| 2226   | 2016 | 0.007 | 0.03 | 0.163071 | 0.02659208 | 22.35653 | 0.020531 | 28.85 |
| 603599 | 2016 | 0.415 | 0.03 | 0.163071 | 0.02659208 | 21.94148 | 0.075322 | 51.92 |
| 887    | 2016 | -0.13 | 0.03 | 0.163071 | 0.02659208 | 23.19689 | 0.140191 | 44.33 |
| 2760   | 2016 | 0.37  | 0.03 | 0.163071 | 0.02659208 | 20.79069 | 0.017916 | 22.06 |
| 2226   | 2016 | 0.007 | 0.03 | 0.163071 | 0.02659208 | 22.35653 | 0.020531 | 28.85 |
| 2226   | 2016 | -0.28 | 0.03 | 0.163071 | 0.02659208 | 22.35653 | 0.020531 | 28.85 |
| 2760   | 2016 | 0.37  | 0.03 | 0.163071 | 0.02659208 | 20.7825  | 0.017916 | 22.06 |
| 603599 | 2016 | 0.323 | 0.03 | 0.163071 | 0.02659208 | 21.94148 | 0.075322 | 51.92 |
| 603599 | 2016 | 0.476 | 0.03 | 0.163071 | 0.02659208 | 21.94148 | 0.075322 | 51.92 |
| 2226   | 2016 | -0.32 | 0.03 | 0.163071 | 0.02659208 | 22.35653 | 0.020531 | 28.85 |
| 2226   | 2016 | -0.16 | 0.03 | 0.163071 | 0.02659208 | 22.35653 | 0.020531 | 28.85 |
| 603599 | 2016 | 0.476 | 0.03 | 0.163071 | 0.02659208 | 21.69005 | 0.075322 | 51.92 |
| 887    | 2016 | -0.01 | 0.03 | 0.163071 | 0.02659208 | 23.19689 | 0.140191 | 44.33 |
| 603599 | 2016 | 0.476 | 0.03 | 0.163071 | 0.02659208 | 21.94148 | 0.075322 | 51.92 |
| 2226   | 2016 | 0.007 | 0.03 | 0.163071 | 0.02659208 | 22.35653 | 0.020531 | 28.85 |
| 2226   | 2016 | -0.31 | 0.03 | 0.163071 | 0.02659208 | 22.35653 | 0.020531 | 28.85 |
| 300475 | 2016 | -0.41 | 0.03 | 0.163071 | 0.02659208 | 21.09578 | 0.084412 | 27.47 |
| 2760   | 2016 | 0.37  | 0.03 | 0.163071 | 0.02659208 | 20.79069 | 0.017916 | 22.06 |
| 887    | 2016 | 0.027 | 0.03 | 0.163071 | 0.02659208 | 23.19689 | 0.140191 | 44.33 |
| 887    | 2016 | -0.09 | 0.03 | 0.163071 | 0.02659208 | 23.19689 | 0.140191 | 44.33 |
| 2226   | 2016 | -0.66 | 0.03 | 0.163071 | 0.02659208 | 22.15509 | 0.020531 | 28.85 |
| 2226   | 2016 | -0.46 | 0.03 | 0.163071 | 0.02659208 | 22.35653 | 0.020531 | 28.85 |
| 603599 | 2016 | 0.323 | 0.03 | 0.163071 | 0.02659208 | 21.94148 | 0.075322 | 51.92 |
| 2226   | 2016 | -0.66 | 0.03 | 0.163071 | 0.02659208 | 22.35653 | 0.020531 | 28.85 |
| 887    | 2016 | -0.09 | 0.03 | 0.163071 | 0.02659208 | 23.19689 | 0.140191 | 44.33 |
| 2226   | 2016 | -0.46 | 0.03 | 0.163071 | 0.02659208 | 22.35653 | 0.020531 | 28.85 |
| 2226   | 2016 | -0.66 | 0.03 | 0.163071 | 0.02659208 | 22.35653 | 0.020531 | 28.85 |
| 887    | 2016 | -0.58 | 0.03 | 0.163071 | 0.02659208 | 23.19689 | 0.140191 | 44.33 |
| 300475 | 2016 | -0.41 | 0.03 | 0.163071 | 0.02659208 | 21.07475 | 0.084412 | 27.47 |
| 2226   | 2016 | -0.46 | 0.03 | 0.163071 | 0.02659208 | 22.35653 | 0.020531 | 28.85 |
| 300475 | 2016 | -0.19 | 0.03 | 0.163071 | 0.02659208 | 21.09578 | 0.084412 | 27.47 |
| 2226   | 2016 | -0.41 | 0.03 | 0.163071 | 0.02659208 | 22.35653 | 0.020531 | 28.85 |

|        |      |       |      |          |            |          |          |       |
|--------|------|-------|------|----------|------------|----------|----------|-------|
| 2226   | 2016 | -0.21 | 0.03 | 0.163071 | 0.02659208 | 22.35653 | 0.020531 | 28.85 |
| 2226   | 2016 | -0.32 | 0.03 | 0.163071 | 0.02659208 | 22.35653 | 0.020531 | 28.85 |
| 300475 | 2016 | -0.38 | 0.03 | 0.163071 | 0.02659208 | 21.09578 | 0.084412 | 27.47 |
| 887    | 2016 | -0    | 0.03 | 0.163071 | 0.02659208 | 23.19689 | 0.140191 | 44.33 |
| 887    | 2016 | -0.58 | 0.03 | 0.163071 | 0.02659208 | 23.19689 | 0.140191 | 44.33 |
| 887    | 2016 | -0.58 | 0.03 | 0.163071 | 0.02659208 | 23.19689 | 0.140191 | 44.33 |
| 887    | 2016 | 0.329 | 0.03 | 0.163071 | 0.02659208 | 22.74526 | 0.140191 | 44.33 |
| 887    | 2016 | 0.063 | 0.03 | 0.163071 | 2.66E-02   | 23.19689 | 0.140191 | 44.33 |
| 2226   | 2016 | 0.14  | 0.03 | 0.163071 | 2.66E-02   | 22.35653 | 0.020531 | 28.85 |
| 300475 | 2016 | -0.02 | 0.03 | 0.163071 | 2.66E-02   | 21.09578 | 0.084412 | 27.47 |
| 887    | 2016 | -0.58 | 0.03 | 0.163071 | 2.66E-02   | 23.19689 | 0.140191 | 44.33 |
| 2585   | 2016 | 0.055 | 0.01 | 0.178066 | 3.17E-02   | 22.61656 | 0.024879 | 33.88 |
| 300160 | 2016 | -0.08 | 0.01 | 0.178066 | 3.17E-02   | 21.26215 | 0.097536 | 24.16 |
| 2304   | 2016 | -0.79 | 0.01 | 0.178066 | 3.17E-02   | 24.38179 | 0.222949 | 34.16 |
| 2585   | 2016 | 0.055 | 0.01 | 0.178066 | 3.17E-02   | 22.62356 | 0.024879 | 33.88 |
| 2304   | 2016 | -0.39 | 0.01 | 0.178066 | 3.17E-02   | 24.4362  | 0.222949 | 34.16 |
| 2585   | 2016 | 0.055 | 0.01 | 0.178066 | 3.17E-02   | 22.62356 | 0.024879 | 33.88 |
| 300160 | 2016 | -0.08 | 0.01 | 0.178066 | 3.17E-02   | 21.24792 | 0.097536 | 24.16 |
| 2304   | 2016 | -0.39 | 0.01 | 0.178066 | 3.17E-02   | 24.38179 | 0.222949 | 34.16 |
| 2585   | 2016 | 0.055 | 0.01 | 0.178066 | 3.17E-02   | 22.62356 | 0.024879 | 33.88 |
| 300160 | 2016 | -0.08 | 0.01 | 0.178066 | 3.17E-02   | 21.26215 | 0.097536 | 24.16 |
| 2585   | 2016 | 0.055 | 0.01 | 0.178066 | 3.17E-02   | 22.62356 | 0.024879 | 33.88 |
| 2304   | 2016 | -0.79 | 0.01 | 0.178066 | 3.17E-02   | 24.38179 | 0.222949 | 34.16 |
| 2304   | 2016 | -0.53 | 0.01 | 0.178066 | 0.03170745 | 24.38179 | 0.222949 | 34.16 |
| 300035 | 2016 | -0.08 | 0.04 | 0.847298 | 0.71791342 | 20.69702 | 0.027752 | 17.24 |
| 702    | 2016 | 0.509 | 0.04 | 0.847298 | 0.71791342 | 20.28651 | 0.002757 | 25.13 |
| 908    | 2016 | 0.736 | 0.04 | 0.847298 | 0.71791342 | 22.35915 | 0.148564 | 19.4  |
| 2549   | 2016 | 0.849 | 0.04 | 0.847298 | 0.71791342 | 20.86899 | 0.023431 | 64.51 |
| 908    | 2016 | 0.252 | 0.04 | 0.847298 | 0.71791342 | 22.49949 | 0.148564 | 19.4  |
| 600963 | 2016 | 0.322 | 0.04 | 0.847298 | 0.71791342 | 23.37849 | 0.005374 | 37.34 |
| 908    | 2016 | 0.294 | 0.04 | 0.847298 | 0.71791342 | 22.35915 | 0.148564 | 19.4  |
| 2549   | 2016 | 0.849 | 0.04 | 0.847298 | 0.71791342 | 20.71072 | 0.023431 | 64.51 |
| 908    | 2016 | 0.834 | 0.04 | 0.847298 | 0.71791342 | 22.35915 | 0.148564 | 19.4  |
| 2549   | 2016 | 0.849 | 0.04 | 0.847298 | 0.71791342 | 20.86899 | 0.023431 | 64.51 |
| 2549   | 2016 | 0.849 | 0.04 | 0.847298 | 0.71791342 | 20.86899 | 0.023431 | 64.51 |
| 600963 | 2016 | 0.322 | 0.04 | 0.847298 | 0.71791342 | 23.37849 | 0.005374 | 37.34 |
| 908    | 2016 | 0.834 | 0.04 | 0.847298 | 0.71791342 | 22.35915 | 0.148564 | 19.4  |
| 2549   | 2016 | 0.849 | 0.04 | 0.847298 | 0.71791342 | 20.86899 | 0.023431 | 64.51 |
| 702    | 2016 | 0.509 | 0.04 | 0.847298 | 0.71791342 | 20.34194 | 0.002757 | 25.13 |
| 600963 | 2016 | -0.27 | 0.04 | 0.847298 | 0.71791342 | 23.37849 | 0.005374 | 37.34 |
| 300035 | 2016 | -0.08 | 0.04 | 0.847298 | 0.71791342 | 20.69702 | 0.027752 | 17.24 |
| 908    | 2016 | 0.834 | 0.04 | 0.847298 | 0.71791342 | 22.35915 | 0.148564 | 19.4  |
| 600963 | 2016 | 0.322 | 0.04 | 0.847298 | 0.71791342 | 23.37849 | 0.005374 | 37.34 |
| 908    | 2016 | 0.205 | 0.04 | 0.847298 | 0.71791342 | 22.35915 | 0.148564 | 19.4  |
| 300035 | 2016 | -0.08 | 0.04 | 0.847298 | 0.71791342 | 20.69702 | 0.027752 | 17.24 |
| 908    | 2016 | 0.006 | 0.04 | 0.847298 | 0.71791342 | 22.35915 | 0.148564 | 19.4  |
| 908    | 2016 | 0.006 | 0.04 | 0.847298 | 0.71791342 | 22.35915 | 0.148564 | 19.4  |
| 600963 | 2016 | -0.02 | 0.04 | 0.847298 | 0.71791342 | 23.37849 | 0.005374 | 37.34 |
| 908    | 2016 | 0.834 | 0.04 | 0.847298 | 0.71791342 | 22.35915 | 0.148564 | 19.4  |
| 908    | 2016 | -0.19 | 0.04 | 0.847298 | 0.71791342 | 22.35915 | 0.148564 | 19.4  |
| 600963 | 2016 | -0.27 | 0.04 | 0.847298 | 0.71791342 | 23.37849 | 0.005374 | 37.34 |
| 600963 | 2016 | 0.322 | 0.04 | 0.847298 | 0.71791342 | 23.18762 | 0.005374 | 37.34 |
| 2549   | 2016 | 0.849 | 0.04 | 0.847298 | 0.71791342 | 20.86899 | 0.023431 | 64.51 |
| 702    | 2016 | 0.509 | 0.04 | 0.847298 | 0.71791342 | 20.28651 | 0.002757 | 25.13 |

|        |      |       |      |          |           |          |          |       |
|--------|------|-------|------|----------|-----------|----------|----------|-------|
| 300169 | 2016 | 0.322 | 0.01 | 1.131665 | 1.2806656 | 21.43906 | 0.007021 | 9.87  |
| 2708   | 2016 | -0.45 | 0.01 | 1.131665 | 1.2806656 | 21.59494 | 0.042457 | 29.57 |
| 300029 | 2016 | 0.476 | 0.01 | 1.131665 | 1.2806656 | 20.24624 | -0.33896 | 20.76 |
| 300029 | 2016 | 0.493 | 0.01 | 1.131665 | 1.2806656 | 20.24624 | -0.33896 | 20.76 |
| 300190 | 2016 | -0.45 | 0.01 | 1.131665 | 1.2806656 | 22.22542 | 0.033104 | 44.3  |
| 603158 | 2016 | -0.38 | 0.01 | 1.131665 | 1.2806656 | 20.9374  | 0.136119 | 49.83 |
| 603158 | 2016 | -0.6  | 0.01 | 1.131665 | 1.2806656 | 20.9374  | 0.136119 | 49.83 |
| 300190 | 2016 | -0.45 | 0.01 | 1.131665 | 1.2806656 | 22.22542 | 0.033104 | 44.3  |
| 2623   | 2016 | -0.02 | 0.01 | 1.131665 | 1.2806656 | 22.17732 | 0.007921 | 45    |
| 2553   | 2016 | -0.29 | 0.01 | 1.131665 | 1.2806656 | 20.43937 | 0.104318 | 39.6  |
| 2478   | 2016 | -0.34 | 0.01 | 1.131665 | 1.2806656 | 22.09255 | 0.041095 | 27.58 |
| 600510 | 2016 | -0.26 | 0.01 | 1.131665 | 1.2806656 | 23.68494 | 0.056502 | 49.92 |
| 601100 | 2016 | -0.66 | 0.01 | 1.131665 | 1.2806656 | 22.37175 | 0.019062 | 42    |
| 300029 | 2016 | 0.476 | 0.01 | 1.131665 | 1.2806656 | 20.24624 | -0.33896 | 20.76 |
| 300190 | 2016 | -0.12 | 0.01 | 1.131665 | 1.2806656 | 22.22542 | 0.033104 | 44.3  |
| 300305 | 2016 | -0.15 | 0.01 | 1.131665 | 1.2806656 | 21.1048  | 0.051605 | 23.46 |
| 600710 | 2016 | -0.46 | 0.01 | 1.131665 | 1.2806656 | 24.33477 | 0.156978 | 23.23 |
| 300196 | 2016 | 0.831 | 0.01 | 1.131665 | 1.2806656 | 21.83057 | 0.117018 | 37.05 |
| 603188 | 2016 | 0.657 | 0.01 | 1.131665 | 1.2806656 | 22.16026 | 0.186287 | 28.84 |
| 300429 | 2016 | 0.934 | 0.01 | 1.131665 | 1.2806656 | 20.81027 | 0.120176 | 29.8  |
| 603188 | 2016 | 0.726 | 0.01 | 1.131665 | 1.2806656 | 22.16026 | 0.186287 | 28.84 |
| 600710 | 2016 | -0.92 | 0.01 | 1.131665 | 1.2806656 | 24.33477 | 0.156978 | 23.23 |
| 300029 | 2016 | 0.476 | 0.01 | 1.131665 | 1.2806656 | 20.24624 | -0.33896 | 20.76 |
| 603158 | 2016 | -0.22 | 0.01 | 1.131665 | 1.2806656 | 20.64243 | 0.136119 | 49.83 |
| 300169 | 2016 | 0.322 | 0.01 | 1.131665 | 1.2806656 | 21.43906 | 0.007021 | 9.87  |
| 600710 | 2016 | -0.92 | 0.01 | 1.131665 | 1.2806656 | 24.33477 | 0.156978 | 23.23 |
| 2553   | 2016 | -0.29 | 0.01 | 1.131665 | 1.2806656 | 20.43937 | 0.104318 | 39.6  |
| 2478   | 2016 | -0.23 | 0.01 | 1.131665 | 1.2806656 | 22.09255 | 0.041095 | 27.58 |
| 603188 | 2016 | 0.657 | 0.01 | 1.131665 | 1.2806656 | 22.16026 | 0.186287 | 28.84 |
| 603158 | 2016 | -0.38 | 0.01 | 1.131665 | 1.2806656 | 20.9374  | 0.136119 | 49.83 |
| 2478   | 2016 | -0.41 | 0.01 | 1.131665 | 1.2806656 | 21.74459 | 0.041095 | 27.58 |
| 300196 | 2016 | 0.831 | 0.01 | 1.131665 | 1.2806656 | 21.83057 | 0.117018 | 37.05 |
| 603158 | 2016 | -0.45 | 0.01 | 1.131665 | 1.2806656 | 20.9374  | 0.136119 | 49.83 |
| 601799 | 2016 | -0.07 | 0.01 | 1.131665 | 1.2806656 | 22.4043  | 0.093061 | 37.3  |
| 600510 | 2016 | -0.26 | 0.01 | 1.131665 | 1.2806656 | 23.68494 | 0.056502 | 49.92 |
| 600710 | 2016 | -0.37 | 0.01 | 1.131665 | 1.2806656 | 24.33477 | 0.156978 | 23.23 |
| 300169 | 2016 | 0.248 | 0.01 | 1.131665 | 1.2806656 | 21.43906 | 0.007021 | 9.87  |
| 2413   | 2016 | 1.394 | 0.01 | 1.131665 | 1.2806656 | 22.04039 | 0.031264 | 26.6  |
| 2413   | 2016 | 1.394 | 0.01 | 1.131665 | 1.2806656 | 21.91588 | 0.031264 | 26.6  |
| 2478   | 2016 | -0.23 | 0.01 | 1.131665 | 1.2806656 | 22.09255 | 0.041095 | 27.58 |
| 603158 | 2016 | -0.6  | 0.01 | 1.131665 | 1.2806656 | 20.9374  | 0.136119 | 49.83 |
| 600710 | 2016 | -0.46 | 0.01 | 1.131665 | 1.2806656 | 24.33477 | 0.156978 | 23.23 |
| 300305 | 2016 | -0.44 | 0.01 | 1.131665 | 1.2806656 | 21.10451 | 0.051605 | 23.46 |
| 300429 | 2016 | 0.934 | 0.01 | 1.131665 | 1.2806656 | 20.55423 | 0.120176 | 29.8  |
| 600710 | 2016 | -0.46 | 0.01 | 1.131665 | 1.2806656 | 24.33477 | 0.156978 | 23.23 |
| 300169 | 2016 | -0.01 | 0.01 | 1.131665 | 1.2806656 | 21.27433 | 0.007021 | 9.87  |
| 300169 | 2016 | -0.01 | 0.01 | 1.131665 | 1.2806656 | 21.43906 | 0.007021 | 9.87  |
| 2708   | 2016 | -0.45 | 0.01 | 1.131665 | 1.2806656 | 21.32798 | 0.042457 | 29.57 |
| 2550   | 2016 | 0.826 | 0.01 | 1.131665 | 1.2806656 | 21.83311 | 0.092671 | 22.8  |
| 2553   | 2016 | -0.29 | 0.01 | 1.131665 | 1.2806656 | 20.43937 | 0.104318 | 39.6  |
| 600510 | 2016 | -0.26 | 0.01 | 1.131665 | 1.2806656 | 23.68494 | 0.056502 | 49.92 |
| 300305 | 2016 | 0.209 | 0.01 | 1.131665 | 1.2806656 | 21.1048  | 0.051605 | 23.46 |
| 2708   | 2016 | -0.34 | 0.01 | 1.131665 | 1.2806656 | 21.59494 | 0.042457 | 29.57 |
| 300190 | 2016 | 0.037 | 0.01 | 1.131665 | 1.2806656 | 22.22542 | 0.033104 | 44.3  |



|        |      |       |      |          |           |          |          |       |
|--------|------|-------|------|----------|-----------|----------|----------|-------|
| 601100 | 2016 | -0.37 | 0.01 | 1.131665 | 1.2806656 | 22.23593 | 0.019062 | 42    |
| 601100 | 2016 | -0.47 | 0.01 | 1.131665 | 1.2806656 | 22.37175 | 0.019062 | 42    |
| 603188 | 2016 | 0.64  | 0.01 | 1.131665 | 1.2806656 | 22.16026 | 0.186287 | 28.84 |
| 601799 | 2016 | -0.07 | 0.01 | 1.131665 | 1.2806656 | 22.4043  | 0.093061 | 37.3  |
| 603188 | 2016 | 0.568 | 0.01 | 1.131665 | 1.2806656 | 21.83847 | 0.186287 | 28.84 |
| 600510 | 2016 | -0.26 | 0.01 | 1.131665 | 1.2806656 | 23.68494 | 0.056502 | 49.92 |
| 2516   | 2016 | -0.36 | 0.01 | 1.131665 | 1.2806656 | 22.66666 | 0.081247 | 45.62 |
| 600710 | 2016 | -0.64 | 0.01 | 1.131665 | 1.2806656 | 24.33477 | 0.156978 | 23.23 |
| 300169 | 2016 | 0.201 | 0.01 | 1.131665 | 1.2806656 | 21.43906 | 0.007021 | 9.87  |
| 300305 | 2016 | 0.209 | 0.01 | 1.131665 | 1.2806656 | 21.1048  | 0.051605 | 23.46 |
| 2708   | 2016 | 0.081 | 0.01 | 1.131665 | 1.2806656 | 21.59494 | 0.042457 | 29.57 |
| 601100 | 2016 | -0.37 | 0.01 | 1.131665 | 1.2806656 | 22.37175 | 0.019062 | 42    |
| 603158 | 2016 | -0.6  | 0.01 | 1.131665 | 1.2806656 | 20.9374  | 0.136119 | 49.83 |
| 600710 | 2016 | -0.46 | 0.01 | 1.131665 | 1.2806656 | 24.33477 | 0.156978 | 23.23 |
| 300029 | 2016 | 0.62  | 0.01 | 1.131665 | 1.2806656 | 20.10336 | -0.33896 | 20.76 |
| 2550   | 2016 | 0.826 | 0.01 | 1.131665 | 1.2806656 | 21.83311 | 0.092671 | 22.8  |
| 570    | 2016 | -0.54 | 0.01 | 1.131665 | 1.2806656 | 22.03829 | 0.027201 | 30.43 |
| 600510 | 2016 | -0.26 | 0.01 | 1.131665 | 1.2806656 | 23.68494 | 0.056502 | 49.92 |
| 2516   | 2016 | -0.42 | 0.01 | 1.131665 | 1.2806656 | 22.66666 | 0.081247 | 45.62 |
| 600710 | 2016 | -0.66 | 0.01 | 1.131665 | 1.2806656 | 24.33477 | 0.156978 | 23.23 |
| 300196 | 2016 | 0.831 | 0.01 | 1.131665 | 1.2806656 | 21.83057 | 0.117018 | 37.05 |
| 300429 | 2016 | 0.934 | 0.01 | 1.131665 | 1.2806656 | 20.81027 | 0.120176 | 29.8  |
| 603158 | 2016 | -0.6  | 0.01 | 1.131665 | 1.2806656 | 20.9374  | 0.136119 | 49.83 |
| 600710 | 2016 | -0.76 | 0.01 | 1.131665 | 1.28E+00  | 24.33477 | 0.156978 | 23.23 |
| 300196 | 2016 | 0.831 | 0.01 | 1.131665 | 1.28E+00  | 21.83057 | 0.117018 | 37.05 |
| 300196 | 2016 | 0.831 | 0.01 | 1.131665 | 1.28E+00  | 21.64858 | 0.117018 | 37.05 |
| 2516   | 2016 | -0.39 | 0.01 | 1.131665 | 1.28E+00  | 22.66666 | 0.081247 | 45.62 |
| 603158 | 2016 | -0.46 | 0.01 | 1.131665 | 1.28E+00  | 20.9374  | 0.136119 | 49.83 |
| 600710 | 2016 | -0.92 | 0.01 | 1.131665 | 1.28E+00  | 24.33477 | 0.156978 | 23.23 |
| 600710 | 2016 | -0.46 | 0.01 | 1.131665 | 1.28E+00  | 24.33477 | 0.156978 | 23.23 |
| 600510 | 2016 | -0.26 | 0.01 | 1.131665 | 1.28E+00  | 23.23532 | 0.056502 | 49.92 |
| 570    | 2016 | -0.54 | 0.01 | 1.131665 | 1.28E+00  | 22.03829 | 0.027201 | 30.43 |
| 2516   | 2016 | -0.36 | 0.01 | 1.131665 | 1.28E+00  | 22.66666 | 0.081247 | 45.62 |
| 2623   | 2016 | -0.02 | 0.01 | 1.131665 | 1.2806656 | 21.93363 | 0.007921 | 45    |
| 2550   | 2016 | 0.55  | 0.01 | 1.131665 | 1.2806656 | 21.83311 | 0.092671 | 22.8  |
| 600710 | 2016 | -0.92 | 0.01 | 1.131665 | 1.2806656 | 24.33477 | 0.156978 | 23.23 |
| 600710 | 2016 | -0.92 | 0.01 | 1.131665 | 1.2806656 | 24.33477 | 0.156978 | 23.23 |
| 570    | 2016 | -0.54 | 0.01 | 1.131665 | 1.2806656 | 22.03829 | 0.027201 | 30.43 |
| 603188 | 2016 | 0.268 | 0.01 | 1.131665 | 1.2806656 | 22.16026 | 0.186287 | 28.84 |
| 2516   | 2016 | -0.41 | 0.01 | 1.131665 | 1.2806656 | 22.04415 | 0.081247 | 45.62 |
| 300169 | 2016 | 0.226 | 0.01 | 1.131665 | 1.2806656 | 21.43906 | 0.007021 | 9.87  |
| 300429 | 2016 | 0.934 | 0.01 | 1.131665 | 1.2806656 | 20.81027 | 0.120176 | 29.8  |
| 2413   | 2016 | 1.685 | 0.01 | 1.131665 | 1.2806656 | 21.91588 | 0.031264 | 26.6  |
| 2550   | 2016 | 0.769 | 0.01 | 1.131665 | 1.2806656 | 21.83311 | 0.092671 | 22.8  |
| 600510 | 2016 | -0.26 | 0.01 | 1.131665 | 1.2806656 | 23.68494 | 0.056502 | 49.92 |
| 603188 | 2016 | 0.268 | 0.01 | 1.131665 | 1.2806656 | 22.16026 | 0.186287 | 28.84 |
| 2516   | 2016 | -0.8  | 0.01 | 1.131665 | 1.2806656 | 22.66666 | 0.081247 | 45.62 |
| 600710 | 2016 | -0.46 | 0.01 | 1.131665 | 1.2806656 | 24.33477 | 0.156978 | 23.23 |
| 2623   | 2016 | -0.02 | 0.01 | 1.131665 | 1.2806656 | 22.17732 | 0.007921 | 45    |
| 300429 | 2016 | 0.934 | 0.01 | 1.131665 | 1.2806656 | 20.81027 | 0.120176 | 29.8  |
| 601799 | 2016 | -0.07 | 0.01 | 1.131665 | 1.2806656 | 22.39868 | 0.093061 | 37.3  |
| 300196 | 2016 | 0.831 | 0.01 | 1.131665 | 1.2806656 | 21.83057 | 0.117018 | 37.05 |
| 600710 | 2016 | -0.46 | 0.01 | 1.131665 | 1.2806656 | 24.33477 | 0.156978 | 23.23 |
| 600710 | 2016 | -0.67 | 0.01 | 1.131665 | 1.2806656 | 24.33477 | 0.156978 | 23.23 |

|        |      |       |      |          |           |          |          |       |
|--------|------|-------|------|----------|-----------|----------|----------|-------|
| 300429 | 2016 | 0.934 | 0.01 | 1.131665 | 1.2806656 | 20.81027 | 0.120176 | 29.8  |
| 601100 | 2016 | -0.32 | 0.01 | 1.131665 | 1.2806656 | 22.37175 | 0.019062 | 42    |
| 300196 | 2016 | 0.831 | 0.01 | 1.131665 | 1.2806656 | 21.83057 | 0.117018 | 37.05 |
| 300029 | 2016 | 0.62  | 0.01 | 1.131665 | 1.2806656 | 20.24624 | -0.33896 | 20.76 |
| 2550   | 2016 | 0.368 | 0.01 | 1.131665 | 1.2806656 | 21.83311 | 0.092671 | 22.8  |
| 300190 | 2016 | 0.037 | 0.01 | 1.131665 | 1.2806656 | 22.12602 | 0.033104 | 44.3  |
| 2413   | 2016 | 1.552 | 0.01 | 1.131665 | 1.2806656 | 21.91588 | 0.031264 | 26.6  |
| 600710 | 2016 | -0.26 | 0.01 | 1.131665 | 1.2806656 | 24.33477 | 0.156978 | 23.23 |
| 601100 | 2016 | -0.23 | 0.01 | 1.131665 | 1.2806656 | 22.37175 | 0.019062 | 42    |
| 2550   | 2016 | 0.826 | 0.01 | 1.131665 | 1.2806656 | 21.83311 | 0.092671 | 22.8  |
| 600710 | 2016 | -0.92 | 0.01 | 1.131665 | 1.2806656 | 24.33477 | 0.156978 | 23.23 |
| 2550   | 2016 | -0.5  | 0.01 | 1.131665 | 1.2806656 | 21.83311 | 0.092671 | 22.8  |
| 601100 | 2016 | -0.3  | 0.01 | 1.131665 | 1.2806656 | 22.37175 | 0.019062 | 42    |
| 2478   | 2016 | -0.56 | 0.01 | 1.131665 | 1.2806656 | 22.09255 | 0.041095 | 27.58 |
| 2550   | 2016 | -0.5  | 0.01 | 1.131665 | 1.2806656 | 21.8251  | 0.092671 | 22.8  |
| 2516   | 2016 | 0.523 | 0.01 | 1.131665 | 1.2806656 | 22.66666 | 0.081247 | 45.62 |
| 600710 | 2016 | -0.26 | 0.01 | 1.131665 | 1.2806656 | 22.19055 | 0.156978 | 23.23 |
| 2553   | 2016 | -0.29 | 0.01 | 1.131665 | 1.2806656 | 20.43937 | 0.104318 | 39.6  |
| 2708   | 2016 | 0.081 | 0.01 | 1.131665 | 1.2806656 | 21.59494 | 0.042457 | 29.57 |
| 2413   | 2016 | 1.552 | 0.01 | 1.131665 | 1.2806656 | 21.91588 | 0.031264 | 26.6  |
| 300169 | 2016 | 0.322 | 0.01 | 1.131665 | 1.2806656 | 21.43906 | 0.007021 | 9.87  |
| 2553   | 2016 | -0.29 | 0.01 | 1.131665 | 1.2806656 | 20.44165 | 0.104318 | 39.6  |
| 300190 | 2016 | -0.28 | 0.01 | 1.131665 | 1.2806656 | 22.22542 | 0.033104 | 44.3  |
| 570    | 2016 | -0.54 | 0.01 | 1.131665 | 1.2806656 | 22.00631 | 0.027201 | 30.43 |
| 300190 | 2016 | -0.05 | 0.01 | 1.131665 | 1.2806656 | 22.22542 | 0.033104 | 44.3  |
| 570    | 2016 | -0.54 | 0.01 | 1.131665 | 1.2806656 | 22.03829 | 0.027201 | 30.43 |
| 600710 | 2016 | -0.26 | 0.01 | 1.131665 | 1.2806656 | 24.33477 | 0.156978 | 23.23 |
| 600710 | 2016 | -0.37 | 0.01 | 1.131665 | 1.2806656 | 24.33477 | 0.156978 | 23.23 |
| 2478   | 2016 | -0.27 | 0.01 | 1.131665 | 1.2806656 | 22.09255 | 0.041095 | 27.58 |
| 600710 | 2016 | -0.46 | 0.01 | 1.131665 | 1.28E+00  | 24.33477 | 0.156978 | 23.23 |
| 300190 | 2016 | -0.45 | 0.01 | 1.131665 | 1.28E+00  | 22.22542 | 0.033104 | 44.3  |
| 300305 | 2016 | -0.44 | 0.01 | 1.131665 | 1.28E+00  | 21.1048  | 0.051605 | 23.46 |
| 2413   | 2016 | 0.986 | 0.01 | 1.131665 | 1.28E+00  | 21.91588 | 0.031264 | 26.6  |
| 600127 | 2016 | 0.152 | 0.04 | 1.136246 | 1.29E+00  | 21.31871 | 0.011797 | 22.34 |
| 600127 | 2016 | -0.35 | 0.04 | 1.136246 | 1.2910546 | 21.31871 | 0.011797 | 22.34 |
| 600127 | 2016 | -0.53 | 0.04 | 1.136246 | 1.2910546 | 21.31871 | 0.011797 | 22.34 |
| 600127 | 2016 | -0.91 | 0.04 | 1.136246 | 1.2910546 | 21.31871 | 0.011797 | 22.34 |
| 600127 | 2016 | -0.47 | 0.04 | 1.136246 | 1.2910546 | 21.31871 | 0.011797 | 22.34 |
| 600127 | 2016 | 0.417 | 0.04 | 1.136246 | 1.2910546 | 21.31871 | 0.011797 | 22.34 |
| 600127 | 2016 | 0.152 | 0.04 | 1.136246 | 1.2910546 | 20.95674 | 0.011797 | 22.34 |
| 600312 | 2016 | 0.266 | 0.03 | 0.92674  | 0.8588462 | 23.59822 | 0.135256 | 38.51 |
| 600312 | 2016 | 0.336 | 0.03 | 0.92674  | 0.8588462 | 23.59822 | 0.135256 | 38.51 |
| 600810 | 2016 | -0.51 | 0.03 | 0.92674  | 0.8588462 | 23.01138 | 0.037222 | 49.28 |
| 600810 | 2016 | -0.64 | 0.03 | 0.92674  | 0.8588462 | 23.01138 | 0.037222 | 49.28 |
| 600312 | 2016 | 0.14  | 0.03 | 0.92674  | 0.8588462 | 23.59822 | 0.135256 | 38.51 |
| 600312 | 2016 | 0.335 | 0.03 | 0.92674  | 0.8588462 | 23.59822 | 0.135256 | 38.51 |
| 600312 | 2016 | 0.253 | 0.03 | 0.92674  | 0.8588462 | 23.59822 | 0.135256 | 38.51 |
| 600312 | 2016 | 0.282 | 0.03 | 0.92674  | 0.8588462 | 23.59822 | 0.135256 | 38.51 |
| 600810 | 2016 | -0.68 | 0.03 | 0.92674  | 0.8588462 | 22.77707 | 0.037222 | 49.28 |
| 600810 | 2016 | -0.25 | 0.03 | 0.92674  | 0.8588462 | 23.01138 | 0.037222 | 49.28 |
| 600810 | 2016 | -0.84 | 0.03 | 0.92674  | 0.8588462 | 23.01138 | 0.037222 | 49.28 |
| 600810 | 2016 | -0.64 | 0.03 | 0.92674  | 0.8588462 | 23.01138 | 0.037222 | 49.28 |
| 600810 | 2016 | -0.51 | 0.03 | 0.92674  | 0.8588462 | 23.01138 | 0.037222 | 49.28 |
| 600810 | 2016 | -0.84 | 0.03 | 0.92674  | 0.8588462 | 23.01138 | 0.037222 | 49.28 |

|        |      |       |      |          |            |          |          |       |
|--------|------|-------|------|----------|------------|----------|----------|-------|
| 600312 | 2016 | 0.266 | 0.03 | 0.92674  | 0.8588462  | 23.59822 | 0.135256 | 38.51 |
| 600312 | 2016 | 0.009 | 0.03 | 0.92674  | 0.8588462  | 23.3157  | 0.135256 | 38.51 |
| 600810 | 2016 | -0.67 | 0.03 | 0.92674  | 0.8588462  | 23.01138 | 0.037222 | 49.28 |
| 600810 | 2016 | -0.51 | 0.03 | 0.92674  | 0.8588462  | 23.01138 | 0.037222 | 49.28 |
| 600312 | 2016 | 0.009 | 0.03 | 0.92674  | 0.8588462  | 23.59822 | 0.135256 | 38.51 |
| 600312 | 2016 | 0.225 | 0.03 | 0.92674  | 0.8588462  | 23.59822 | 0.135256 | 38.51 |
| 600312 | 2016 | 0.258 | 0.03 | 0.92674  | 0.8588462  | 23.59822 | 0.135256 | 38.51 |
| 300482 | 2016 | 0.366 | 0.05 | 0.405465 | 0.16440195 | 20.729   | 0.170233 | 24.83 |
| 300155 | 2016 | 0.625 | 0.05 | 0.405465 | 0.16440195 | 21.11255 | 0.018555 | 37.38 |
| 2311   | 2016 | -0.84 | 0.05 | 0.405465 | 0.16440195 | 23.05423 | 0.150235 | 59.07 |
| 2461   | 2016 | -0.07 | 0.05 | 0.405465 | 0.16440195 | 22.61259 | 0.035619 | 52.03 |
| 2045   | 2016 | 0.991 | 0.05 | 0.405465 | 0.16440195 | 21.82333 | 0.039092 | 21.88 |
| 300482 | 2016 | 0.335 | 0.05 | 0.405465 | 0.16440195 | 20.74614 | 0.170233 | 24.83 |
| 2311   | 2016 | 0.483 | 0.05 | 0.405465 | 0.16440195 | 22.75123 | 0.150235 | 59.07 |
| 2192   | 2016 | -0.05 | 0.05 | 0.405465 | 0.16440195 | 20.63225 | 0.019667 | 23.65 |
| 2709   | 2016 | 0.604 | 0.05 | 0.405465 | 0.16440195 | 21.57144 | 0.24195  | 41.49 |
| 300310 | 2016 | 0.087 | 0.05 | 0.405465 | 0.16440195 | 21.90236 | 0.070595 | 8.38  |
| 300335 | 2016 | -0.06 | 0.05 | 0.405465 | 0.16440195 | 21.68496 | 0.116416 | 14.07 |
| 2420   | 2016 | -0.71 | 0.05 | 0.405465 | 0.16440195 | 22.14619 | 0.008919 | 25.98 |
| 300177 | 2016 | 0.984 | 0.05 | 0.405465 | 0.16440195 | 21.4448  | 0.011106 | 26.18 |
| 300098 | 2016 | 0.649 | 0.05 | 0.405465 | 0.16440195 | 22.29816 | 0.083557 | 35.65 |
| 2060   | 2016 | -0.1  | 0.05 | 0.405465 | 0.16440195 | 23.47797 | 0.049197 | 34.53 |
| 603002 | 2016 | 0.901 | 0.05 | 0.405465 | 0.16440195 | 21.13588 | 0.025944 | 41.32 |
| 300238 | 2016 | 0.824 | 0.05 | 0.405465 | 0.16440195 | 21.21594 | 0.033656 | 20.71 |
| 600332 | 2016 | 0.015 | 0.05 | 0.405465 | 0.16440195 | 23.9774  | 0.088291 | 45.04 |
| 300310 | 2016 | 0.572 | 0.05 | 0.405465 | 0.16440195 | 21.90236 | 0.070595 | 8.38  |
| 601238 | 2016 | -0.07 | 0.05 | 0.405465 | 0.16440195 | 25.13111 | 0.14042  | 60.63 |
| 300448 | 2016 | 0.413 | 0.05 | 0.405465 | 0.16440195 | 20.6164  | 0.132845 | 38.99 |
| 2177   | 2016 | 1.34  | 0.05 | 0.405465 | 0.16440195 | 21.49719 | 0.013863 | 20.81 |
| 2656   | 2016 | 0.518 | 0.05 | 0.405465 | 0.16440195 | 21.79713 | -0.17915 | 31.03 |
| 300238 | 2016 | 0.824 | 0.05 | 0.405465 | 0.16440195 | 21.21594 | 0.033656 | 20.71 |
| 600332 | 2016 | -0.15 | 0.05 | 0.405465 | 0.16440195 | 23.9774  | 0.088291 | 45.04 |
| 2084   | 2016 | 0.193 | 0.05 | 0.405465 | 0.16440195 | 21.34856 | 0.069677 | 30.07 |
| 601238 | 2016 | -0.14 | 0.05 | 0.405465 | 0.16440195 | 25.13111 | 0.14042  | 60.63 |
| 600728 | 2016 | 0.84  | 0.05 | 0.405465 | 0.16440195 | 22.31631 | 0.04529  | 14.17 |
| 300297 | 2016 | 1.036 | 0.05 | 0.405465 | 0.16440195 | 22.56409 | 0.08986  | 15.23 |
| 300219 | 2016 | -0.24 | 0.05 | 0.405465 | 0.16440195 | 21.92561 | 0.072819 | 25.11 |
| 2683   | 2016 | -0.16 | 0.05 | 0.405465 | 0.16440195 | 22.44957 | 0.021804 | 21.13 |
| 2152   | 2016 | 0.435 | 0.05 | 0.405465 | 0.16440195 | 23.20036 | 0.100527 | 52.52 |
| 600143 | 2016 | 0.693 | 0.05 | 0.405465 | 0.16440195 | 23.73186 | 0.075724 | 18.79 |
| 600894 | 2016 | -0.47 | 0.05 | 0.405465 | 0.16440195 | 22.98162 | 0.15503  | 56.56 |
| 600332 | 2016 | 0.456 | 0.05 | 0.405465 | 0.16440195 | 23.55665 | 0.088291 | 45.04 |
| 2030   | 2016 | 1.219 | 0.05 | 0.405465 | 0.16440195 | 22.14388 | 0.053233 | 16.63 |
| 2656   | 2016 | -0.81 | 0.05 | 0.405465 | 0.16440195 | 21.79713 | -0.17915 | 31.03 |
| 2465   | 2016 | 1.372 | 0.05 | 0.405465 | 0.16440195 | 23.11296 | 0.084362 | 21.22 |
| 300297 | 2016 | 1.036 | 0.05 | 0.405465 | 0.16440195 | 22.56409 | 0.08986  | 15.23 |
| 300177 | 2016 | 0.901 | 0.05 | 0.405465 | 0.16440195 | 21.4448  | 0.011106 | 26.18 |
| 2311   | 2016 | 0.483 | 0.05 | 0.405465 | 0.16440195 | 23.05423 | 0.150235 | 59.07 |
| 2683   | 2016 | 0.797 | 0.05 | 0.405465 | 0.16440195 | 22.44957 | 0.021804 | 21.13 |
| 523    | 2016 | 0.786 | 0.05 | 0.405465 | 0.16440195 | 22.15125 | 0.021843 | 30.04 |
| 2027   | 2016 | -0.43 | 0.05 | 0.405465 | 0.16440195 | 23.21887 | 0.302158 | 23.34 |
| 2169   | 2016 | -0.05 | 0.05 | 0.405465 | 0.16440195 | 22.03596 | 0.050174 | 19.3  |
| 600894 | 2016 | -0.11 | 0.05 | 0.405465 | 0.16440195 | 22.98162 | 0.15503  | 56.56 |
| 300438 | 2016 | -0.13 | 0.05 | 0.405465 | 0.16440195 | 21.36597 | 0.144141 | 34.96 |

|        |      |       |      |          |            |          |          |       |
|--------|------|-------|------|----------|------------|----------|----------|-------|
| 300177 | 2016 | 0.949 | 0.05 | 0.405465 | 0.16440195 | 21.23311 | 0.011106 | 26.18 |
| 2683   | 2016 | -0.53 | 0.05 | 0.405465 | 0.16440195 | 22.44957 | 0.021804 | 21.13 |
| 2181   | 2016 | -0.98 | 0.05 | 0.405465 | 0.16440195 | 22.2687  | 0.049059 | 47.46 |
| 2169   | 2016 | -0.05 | 0.05 | 0.405465 | 0.16440195 | 21.81016 | 0.050174 | 19.3  |
| 600894 | 2016 | -0.63 | 0.05 | 0.405465 | 0.16440195 | 22.98162 | 0.15503  | 56.56 |
| 603002 | 2016 | 0.901 | 0.05 | 0.405465 | 0.16440195 | 21.13588 | 0.025944 | 41.32 |
| 600332 | 2016 | 0.456 | 0.05 | 0.405465 | 0.16440195 | 23.9774  | 0.088291 | 45.04 |
| 300438 | 2016 | -0.02 | 0.05 | 0.405465 | 0.16440195 | 21.36597 | 0.144141 | 34.96 |
| 2572   | 2016 | -0.45 | 0.05 | 0.405465 | 0.16440195 | 22.39815 | 0.159696 | 24.26 |
| 2209   | 2016 | 0.177 | 0.05 | 0.405465 | 0.16440195 | 21.21668 | -0.07399 | 19.55 |
| 2465   | 2016 | 0.154 | 0.05 | 0.405465 | 0.16440195 | 23.11296 | 0.084362 | 21.22 |
| 300448 | 2016 | 0.28  | 0.05 | 0.405465 | 0.16440195 | 20.6164  | 0.132845 | 38.99 |
| 601238 | 2016 | -0.14 | 0.05 | 0.405465 | 0.16440195 | 25.13111 | 0.14042  | 60.63 |
| 2192   | 2016 | -0.05 | 0.05 | 0.405465 | 0.16440195 | 20.63225 | 0.019667 | 23.65 |
| 600685 | 2016 | -0.15 | 0.05 | 0.405465 | 0.16440195 | 24.55773 | 0.008327 | 41.65 |
| 2311   | 2016 | 0.483 | 0.05 | 0.405465 | 0.16440195 | 23.05423 | 0.150235 | 59.07 |
| 300335 | 2016 | -0.46 | 0.05 | 0.405465 | 0.16440195 | 21.68496 | 0.116416 | 14.07 |
| 861    | 2016 | -0.42 | 0.05 | 0.405465 | 0.16440195 | 23.0431  | 0.074775 | 48.17 |
| 2678   | 2016 | 0.114 | 0.05 | 0.405465 | 0.16440195 | 21.78621 | 0.074578 | 74.18 |
| 429    | 2016 | 0.354 | 0.05 | 0.405465 | 0.16440195 | 23.50037 | 0.132567 | 24.55 |
| 2732   | 2016 | -0.83 | 0.05 | 0.405465 | 0.16440195 | 20.8647  | 0.122171 | 40.97 |
| 600098 | 2016 | 0.055 | 0.05 | 0.405465 | 0.16440195 | 24.28764 | 0.054832 | 62.69 |
| 300155 | 2016 | 0.625 | 0.05 | 0.405465 | 0.16440195 | 21.11255 | 0.018555 | 37.38 |
| 300098 | 2016 | 0.608 | 0.05 | 0.405465 | 0.16440195 | 22.29816 | 0.083557 | 35.65 |
| 600143 | 2016 | 0.602 | 0.05 | 0.405465 | 0.16440195 | 23.73186 | 0.075724 | 18.79 |
| 600143 | 2016 | 0.136 | 0.05 | 0.405465 | 0.16440195 | 23.73186 | 0.075724 | 18.79 |
| 300030 | 2016 | 0.118 | 0.05 | 0.405465 | 0.16440195 | 21.10845 | 0.03196  | 23.43 |
| 600332 | 2016 | -0.72 | 0.05 | 0.405465 | 0.16440195 | 23.9774  | 0.088291 | 45.04 |
| 2045   | 2016 | 0.03  | 0.05 | 0.405465 | 0.16440195 | 21.82333 | 0.039092 | 21.88 |
| 300424 | 2016 | 0.293 | 0.05 | 0.405465 | 0.16440195 | 20.82805 | 0.068411 | 22.07 |
| 2420   | 2016 | -0.48 | 0.05 | 0.405465 | 0.16440195 | 22.14619 | 0.008919 | 25.98 |
| 300147 | 2016 | 0.323 | 0.05 | 0.405465 | 0.16440195 | 22.60435 | 0.0265   | 34.11 |
| 2027   | 2016 | 0.433 | 0.05 | 0.405465 | 0.16440195 | 23.21887 | 0.302158 | 23.34 |
| 2683   | 2016 | 0.797 | 0.05 | 0.405465 | 0.16440195 | 22.44957 | 0.021804 | 21.13 |
| 300238 | 2016 | 0.824 | 0.05 | 0.405465 | 0.16440195 | 21.21594 | 0.033656 | 20.71 |
| 2027   | 2016 | 0.433 | 0.05 | 0.405465 | 0.16440195 | 23.21887 | 0.302158 | 23.34 |
| 601238 | 2016 | -0.52 | 0.05 | 0.405465 | 0.16440195 | 25.13111 | 0.14042  | 60.63 |
| 2027   | 2016 | -0.37 | 0.05 | 0.405465 | 0.16440195 | 23.21887 | 0.302158 | 23.34 |
| 300177 | 2016 | 1.482 | 0.05 | 0.405465 | 0.16440195 | 21.4448  | 0.011106 | 26.18 |
| 2045   | 2016 | 0.108 | 0.05 | 0.405465 | 0.16440195 | 21.82333 | 0.039092 | 21.88 |
| 300438 | 2016 | 0.114 | 0.05 | 0.405465 | 0.16440195 | 21.36597 | 0.144141 | 34.96 |
| 2181   | 2016 | -0.98 | 0.05 | 0.405465 | 0.16440195 | 22.2923  | 0.049059 | 47.46 |
| 2420   | 2016 | 0.613 | 0.05 | 0.405465 | 0.16440195 | 22.14619 | 0.008919 | 25.98 |
| 601238 | 2016 | -0.52 | 0.05 | 0.405465 | 0.16440195 | 25.13111 | 0.14042  | 60.63 |
| 2152   | 2016 | -0.29 | 0.05 | 0.405465 | 0.16440195 | 23.20036 | 0.100527 | 52.52 |
| 2030   | 2016 | 0.674 | 0.05 | 0.405465 | 0.16440195 | 21.47209 | 0.053233 | 16.63 |
| 2311   | 2016 | 0.483 | 0.05 | 0.405465 | 0.16440195 | 23.05423 | 0.150235 | 59.07 |
| 300297 | 2016 | 1.162 | 0.05 | 0.405465 | 0.16440195 | 22.56409 | 0.08986  | 15.23 |
| 2181   | 2016 | -0.98 | 0.05 | 0.405465 | 0.16440195 | 22.2687  | 0.049059 | 47.46 |
| 2420   | 2016 | -0.62 | 0.05 | 0.405465 | 0.16440195 | 22.14619 | 0.008919 | 25.98 |
| 2465   | 2016 | 1.372 | 0.05 | 0.405465 | 0.16440195 | 23.11296 | 0.084362 | 21.22 |
| 2683   | 2016 | -0.05 | 0.05 | 0.405465 | 0.16440195 | 22.44957 | 0.021804 | 21.13 |
| 2709   | 2016 | 0.607 | 0.05 | 0.405465 | 0.16440195 | 21.57144 | 0.24195  | 41.49 |
| 2030   | 2016 | 0.493 | 0.05 | 0.405465 | 0.16440195 | 22.14388 | 0.053233 | 16.63 |

|        |      |       |      |          |            |          |          |       |
|--------|------|-------|------|----------|------------|----------|----------|-------|
| 601238 | 2016 | -0.33 | 0.05 | 0.405465 | 0.16440195 | 25.13111 | 0.14042  | 60.63 |
| 2152   | 2016 | -0.26 | 0.05 | 0.405465 | 0.16440195 | 23.06581 | 0.100527 | 52.52 |
| 300438 | 2016 | -0.22 | 0.05 | 0.405465 | 0.16440195 | 21.36597 | 0.144141 | 34.96 |
| 300177 | 2016 | 1.671 | 0.05 | 0.405465 | 0.16440195 | 21.4448  | 0.011106 | 26.18 |
| 600728 | 2016 | 0.84  | 0.05 | 0.405465 | 0.16440195 | 22.31631 | 0.04529  | 14.17 |
| 2311   | 2016 | 0.483 | 0.05 | 0.405465 | 0.16440195 | 23.05423 | 0.150235 | 59.07 |
| 2030   | 2016 | 1.219 | 0.05 | 0.405465 | 0.16440195 | 22.14388 | 0.053233 | 16.63 |
| 2311   | 2016 | 0.483 | 0.05 | 0.405465 | 0.16440195 | 23.05423 | 0.150235 | 59.07 |
| 2311   | 2016 | 0.483 | 0.05 | 0.405465 | 0.16440195 | 23.05423 | 0.150235 | 59.07 |
| 2084   | 2016 | -0.1  | 0.05 | 0.405465 | 0.16440195 | 21.34856 | 0.069677 | 30.07 |
| 600098 | 2016 | 0.127 | 0.05 | 0.405465 | 0.16440195 | 24.28764 | 0.054832 | 62.69 |
| 2030   | 2016 | -0.11 | 0.05 | 0.405465 | 0.16440195 | 22.14388 | 0.053233 | 16.63 |
| 600728 | 2016 | 0.84  | 0.05 | 0.405465 | 0.16440195 | 22.31631 | 0.04529  | 14.17 |
| 300482 | 2016 | 0.613 | 0.05 | 0.405465 | 0.16440195 | 20.729   | 0.170233 | 24.83 |
| 2084   | 2016 | 0.193 | 0.05 | 0.405465 | 0.16440195 | 21.34856 | 0.069677 | 30.07 |
| 300155 | 2016 | 0.625 | 0.05 | 0.405465 | 0.16440195 | 21.11255 | 0.018555 | 37.38 |
| 2177   | 2016 | 1.13  | 0.05 | 0.405465 | 0.16440195 | 21.49719 | 0.013863 | 20.81 |
| 601238 | 2016 | -0.14 | 0.05 | 0.405465 | 0.16440195 | 25.13111 | 0.14042  | 60.63 |
| 2177   | 2016 | 1.13  | 0.05 | 0.405465 | 0.16440195 | 21.49719 | 0.013863 | 20.81 |
| 600029 | 2016 | -0.59 | 0.05 | 0.405465 | 0.16440195 | 25.74206 | 0.107626 | 41.14 |
| 2311   | 2016 | 0.483 | 0.05 | 0.405465 | 0.16440195 | 23.05423 | 0.150235 | 59.07 |
| 2311   | 2016 | 0.483 | 0.05 | 0.405465 | 0.16440195 | 23.05423 | 0.150235 | 59.07 |
| 2663   | 2016 | -0.62 | 0.05 | 0.405465 | 0.16440195 | 22.76429 | 0.023863 | 23.99 |
| 600029 | 2016 | -0.98 | 0.05 | 0.405465 | 0.16440195 | 25.74206 | 0.107626 | 41.14 |
| 2311   | 2016 | 0.483 | 0.05 | 0.405465 | 0.16440195 | 23.05423 | 0.150235 | 59.07 |
| 2311   | 2016 | 0.176 | 0.05 | 0.405465 | 0.16440195 | 23.05423 | 0.150235 | 59.07 |
| 300177 | 2016 | 1.141 | 0.05 | 0.405465 | 0.16440195 | 21.4448  | 0.011106 | 26.18 |
| 600098 | 2016 | 0.164 | 0.05 | 0.405465 | 0.16440195 | 24.28764 | 0.054832 | 62.69 |
| 300238 | 2016 | 0.824 | 0.05 | 0.405465 | 0.16440195 | 21.21594 | 0.033656 | 20.71 |
| 300219 | 2016 | -0.3  | 0.05 | 0.405465 | 0.16440195 | 21.92561 | 0.072819 | 25.11 |
| 2572   | 2016 | -0.59 | 0.05 | 0.405465 | 0.16440195 | 22.39815 | 0.159696 | 24.26 |
| 2656   | 2016 | -0.05 | 0.05 | 0.405465 | 0.16440195 | 21.69288 | -0.17915 | 31.03 |
| 600029 | 2016 | -0.98 | 0.05 | 0.405465 | 0.16440195 | 25.74206 | 0.107626 | 41.14 |
| 2678   | 2016 | 0.114 | 0.05 | 0.405465 | 0.16440195 | 21.78621 | 0.074578 | 74.18 |
| 300219 | 2016 | -0.3  | 0.05 | 0.405465 | 0.16440195 | 21.92561 | 0.072819 | 25.11 |
| 300297 | 2016 | 0.5   | 0.05 | 0.405465 | 0.16440195 | 22.56409 | 0.08986  | 15.23 |
| 601238 | 2016 | -0.37 | 0.05 | 0.405465 | 0.16440195 | 25.13111 | 0.14042  | 60.63 |
| 2678   | 2016 | -0.06 | 0.05 | 0.405465 | 0.16440195 | 21.78621 | 0.074578 | 74.18 |
| 600098 | 2016 | 0.85  | 0.05 | 0.405465 | 0.16440195 | 24.28764 | 0.054832 | 62.69 |
| 2084   | 2016 | 0.193 | 0.05 | 0.405465 | 0.16440195 | 21.34856 | 0.069677 | 30.07 |
| 600143 | 2016 | 0.773 | 0.05 | 0.405465 | 0.16440195 | 23.73186 | 0.075724 | 18.79 |
| 2656   | 2016 | 0.518 | 0.05 | 0.405465 | 0.16440195 | 21.79713 | -0.17915 | 31.03 |
| 2732   | 2016 | -0.83 | 0.05 | 0.405465 | 0.16440195 | 20.80388 | 0.122171 | 40.97 |
| 600332 | 2016 | -0.15 | 0.05 | 0.405465 | 0.16440195 | 23.9774  | 0.088291 | 45.04 |
| 300177 | 2016 | 0.876 | 0.05 | 0.405465 | 0.16440195 | 21.4448  | 0.011106 | 26.18 |
| 300177 | 2016 | 0.567 | 0.05 | 0.405465 | 0.16440195 | 21.4448  | 0.011106 | 26.18 |
| 300177 | 2016 | 0.894 | 0.05 | 0.405465 | 0.16440195 | 21.4448  | 0.011106 | 26.18 |
| 2030   | 2016 | 1.219 | 0.05 | 0.405465 | 0.16440195 | 22.14388 | 0.053233 | 16.63 |
| 2169   | 2016 | 0.412 | 0.05 | 0.405465 | 0.16440195 | 22.03596 | 0.050174 | 19.3  |
| 2027   | 2016 | -0.23 | 0.05 | 0.405465 | 0.16440195 | 23.21887 | 0.302158 | 23.34 |
| 601238 | 2016 | -0.14 | 0.05 | 0.405465 | 0.16440195 | 25.13111 | 0.14042  | 60.63 |
| 2663   | 2016 | -0.28 | 0.05 | 0.405465 | 0.16440195 | 22.76429 | 0.023863 | 23.99 |
| 300448 | 2016 | 1.075 | 0.05 | 0.405465 | 0.16440195 | 20.51359 | 0.132845 | 38.99 |
| 2461   | 2016 | -0.57 | 0.05 | 0.405465 | 0.16440195 | 22.61259 | 0.035619 | 52.03 |

|        |      |       |      |          |            |          |          |       |
|--------|------|-------|------|----------|------------|----------|----------|-------|
| 600143 | 2016 | 0.73  | 0.05 | 0.405465 | 0.16440195 | 23.73186 | 0.075724 | 18.79 |
| 300098 | 2016 | 0.58  | 0.05 | 0.405465 | 0.16440195 | 22.29816 | 0.083557 | 35.65 |
| 2461   | 2016 | -0.57 | 0.05 | 0.405465 | 0.16440195 | 22.61259 | 0.035619 | 52.03 |
| 2027   | 2016 | -0.43 | 0.05 | 0.405465 | 0.16440195 | 24.65107 | 0.302158 | 23.34 |
| 2465   | 2016 | 0.57  | 0.05 | 0.405465 | 0.16440195 | 23.11296 | 0.084362 | 21.22 |
| 300177 | 2016 | 1.174 | 0.05 | 0.405465 | 0.16440195 | 21.4448  | 0.011106 | 26.18 |
| 600143 | 2016 | -0.01 | 0.05 | 0.405465 | 0.16440195 | 23.73186 | 0.075724 | 18.79 |
| 2709   | 2016 | 0.844 | 0.05 | 0.405465 | 0.16440195 | 21.57144 | 0.24195  | 41.49 |
| 2465   | 2016 | 0.047 | 0.05 | 0.405465 | 0.16440195 | 23.11296 | 0.084362 | 21.22 |
| 601238 | 2016 | -0.14 | 0.05 | 0.405465 | 0.16440195 | 25.13111 | 0.14042  | 60.63 |
| 300147 | 2016 | 0.283 | 0.05 | 0.405465 | 0.16440195 | 22.8013  | 0.0265   | 34.11 |
| 300147 | 2016 | 0.392 | 0.05 | 0.405465 | 0.16440195 | 22.8013  | 0.0265   | 34.11 |
| 600098 | 2016 | 0.138 | 0.05 | 0.405465 | 0.16440195 | 24.28764 | 0.054832 | 62.69 |
| 600685 | 2016 | -0.4  | 0.05 | 0.405465 | 0.16440195 | 24.55773 | 0.008327 | 41.65 |
| 300030 | 2016 | -0.03 | 0.05 | 0.405465 | 0.16440195 | 21.10845 | 0.03196  | 23.43 |
| 2683   | 2016 | -0.09 | 0.05 | 0.405465 | 0.16440195 | 22.44957 | 0.021804 | 21.13 |
| 2030   | 2016 | 1.219 | 0.05 | 0.405465 | 0.16440195 | 22.14388 | 0.053233 | 16.63 |
| 2465   | 2016 | 0.72  | 0.05 | 0.405465 | 0.16440195 | 23.11296 | 0.084362 | 21.22 |
| 2169   | 2016 | 0.181 | 0.05 | 0.405465 | 0.16440195 | 22.03596 | 0.050174 | 19.3  |
| 2311   | 2016 | 0.483 | 0.05 | 0.405465 | 0.16440195 | 23.05423 | 0.150235 | 59.07 |
| 2420   | 2016 | -0.48 | 0.05 | 0.405465 | 0.16440195 | 22.14619 | 0.008919 | 25.98 |
| 2311   | 2016 | 0.483 | 0.05 | 0.405465 | 0.16440195 | 23.05423 | 0.150235 | 59.07 |
| 300297 | 2016 | 1.162 | 0.05 | 0.405465 | 0.16440195 | 22.56409 | 0.08986  | 15.23 |
| 600332 | 2016 | -0.87 | 0.05 | 0.405465 | 0.16440195 | 23.9774  | 0.088291 | 45.04 |
| 2465   | 2016 | 1.041 | 0.05 | 0.405465 | 0.16440195 | 23.11296 | 0.084362 | 21.22 |
| 300297 | 2016 | 1.162 | 0.05 | 0.405465 | 0.16440195 | 22.15638 | 0.08986  | 15.23 |
| 2544   | 2016 | 0.336 | 0.05 | 0.405465 | 0.16440195 | 22.05749 | 0.07934  | 34.53 |
| 300098 | 2016 | 0.443 | 0.05 | 0.405465 | 0.16440195 | 22.29816 | 0.083557 | 35.65 |
| 2572   | 2016 | -0.59 | 0.05 | 0.405465 | 0.16440195 | 22.39815 | 0.159696 | 24.26 |
| 300219 | 2016 | -0.33 | 0.05 | 0.405465 | 0.16440195 | 21.92561 | 0.072819 | 25.11 |
| 600894 | 2016 | -0.28 | 0.05 | 0.405465 | 0.16440195 | 22.98162 | 0.15503  | 56.56 |
| 300424 | 2016 | 0.293 | 0.05 | 0.405465 | 0.16440195 | 20.82805 | 0.068411 | 22.07 |
| 603002 | 2016 | 0.901 | 0.05 | 0.405465 | 0.16440195 | 20.95743 | 0.025944 | 41.32 |
| 300098 | 2016 | 0.848 | 0.05 | 0.405465 | 0.16440195 | 22.29816 | 0.083557 | 35.65 |
| 300098 | 2016 | 1.179 | 0.05 | 0.405465 | 0.16440195 | 22.20243 | 0.083557 | 35.65 |
| 600143 | 2016 | 0.57  | 0.05 | 0.405465 | 0.16440195 | 23.41057 | 0.075724 | 18.79 |
| 2683   | 2016 | -0.2  | 0.05 | 0.405465 | 0.16440195 | 22.44957 | 0.021804 | 21.13 |
| 2027   | 2016 | -0.43 | 0.05 | 0.405465 | 0.16440195 | 23.21887 | 0.302158 | 23.34 |
| 2683   | 2016 | -0.53 | 0.05 | 0.405465 | 0.16440195 | 22.44957 | 0.021804 | 21.13 |
| 2732   | 2016 | -0.83 | 0.05 | 0.405465 | 0.16440195 | 20.8647  | 0.122171 | 40.97 |
| 600685 | 2016 | -0.1  | 0.05 | 0.405465 | 0.16440195 | 24.55773 | 0.008327 | 41.65 |
| 861    | 2016 | -0.42 | 0.05 | 0.405465 | 0.16440195 | 23.0431  | 0.074775 | 48.17 |
| 2678   | 2016 | 0.169 | 0.05 | 0.405465 | 0.16440195 | 21.70793 | 0.074578 | 74.18 |
| 2152   | 2016 | 0.611 | 0.05 | 0.405465 | 0.16440195 | 23.20036 | 0.100527 | 52.52 |
| 2311   | 2016 | 0.483 | 0.05 | 0.405465 | 0.16440195 | 23.05423 | 0.150235 | 59.07 |
| 523    | 2016 | -0.37 | 0.05 | 0.405465 | 0.16440195 | 22.15125 | 0.021843 | 30.04 |
| 300155 | 2016 | 0.625 | 0.05 | 0.405465 | 0.16440195 | 21.11255 | 0.018555 | 37.38 |
| 600685 | 2016 | -0.13 | 0.05 | 0.405465 | 0.16440195 | 24.55773 | 0.008327 | 41.65 |
| 300177 | 2016 | 0.946 | 0.05 | 0.405465 | 0.16440195 | 21.4448  | 0.011106 | 26.18 |
| 300335 | 2016 | -0.64 | 0.05 | 0.405465 | 0.16440195 | 21.68496 | 0.116416 | 14.07 |
| 600143 | 2016 | 0.693 | 0.05 | 0.405465 | 0.16440195 | 23.73186 | 0.075724 | 18.79 |
| 2181   | 2016 | -0.98 | 0.05 | 0.405465 | 0.16440195 | 22.2687  | 0.049059 | 47.46 |
| 2192   | 2016 | -0.32 | 0.05 | 0.405465 | 0.16440195 | 20.66742 | 0.019667 | 23.65 |
| 300030 | 2016 | 0.331 | 0.05 | 0.405465 | 0.16440195 | 21.10845 | 0.03196  | 23.43 |

|        |      |       |      |          |            |          |          |       |
|--------|------|-------|------|----------|------------|----------|----------|-------|
| 2192   | 2016 | -0.05 | 0.05 | 0.405465 | 0.16440195 | 20.63225 | 0.019667 | 23.65 |
| 600143 | 2016 | 0.798 | 0.05 | 0.405465 | 0.16440195 | 23.73186 | 0.075724 | 18.79 |
| 523    | 2016 | -0.54 | 0.05 | 0.405465 | 0.16440195 | 22.15125 | 0.021843 | 30.04 |
| 2465   | 2016 | 1.372 | 0.05 | 0.405465 | 0.16440195 | 23.11296 | 0.084362 | 21.22 |
| 300098 | 2016 | 0.848 | 0.05 | 0.405465 | 0.16440195 | 22.29816 | 0.083557 | 35.65 |
| 2683   | 2016 | 0.569 | 0.05 | 0.405465 | 0.16440195 | 22.44957 | 0.021804 | 21.13 |
| 2152   | 2016 | 0.471 | 0.05 | 0.405465 | 0.16440195 | 23.20036 | 0.100527 | 52.52 |
| 300030 | 2016 | 0.331 | 0.05 | 0.405465 | 0.16440195 | 21.10845 | 0.03196  | 23.43 |
| 2169   | 2016 | 0.261 | 0.05 | 0.405465 | 0.16440195 | 22.03596 | 0.050174 | 19.3  |
| 600728 | 2016 | 0.702 | 0.05 | 0.405465 | 0.16440195 | 22.31631 | 0.04529  | 14.17 |
| 300030 | 2016 | -0.03 | 0.05 | 0.405465 | 0.16440195 | 21.10845 | 0.03196  | 23.43 |
| 300030 | 2016 | -0.03 | 0.05 | 0.405465 | 0.16440195 | 21.10845 | 0.03196  | 23.43 |
| 300155 | 2016 | 0.625 | 0.05 | 0.405465 | 0.16440195 | 21.11943 | 0.018555 | 37.38 |
| 600685 | 2016 | 0.291 | 0.05 | 0.405465 | 0.16440195 | 22.98456 | 0.008327 | 41.65 |
| 2465   | 2016 | 1.372 | 0.05 | 0.405465 | 0.16440195 | 23.11296 | 0.084362 | 21.22 |
| 2663   | 2016 | -0.28 | 0.05 | 0.405465 | 0.16440195 | 22.76429 | 0.023863 | 23.99 |
| 300424 | 2016 | 0.08  | 0.05 | 0.405465 | 0.16440195 | 20.64015 | 0.068411 | 22.07 |
| 2678   | 2016 | 0.169 | 0.05 | 0.405465 | 0.16440195 | 21.78621 | 0.074578 | 74.18 |
| 600728 | 2016 | 0.126 | 0.05 | 0.405465 | 0.16440195 | 22.31631 | 0.04529  | 14.17 |
| 300147 | 2016 | 0.891 | 0.05 | 0.405465 | 0.16440195 | 22.8013  | 0.0265   | 34.11 |
| 300335 | 2016 | -0.3  | 0.05 | 0.405465 | 0.16440195 | 21.68496 | 0.116416 | 14.07 |
| 2060   | 2016 | -0.01 | 0.05 | 0.405465 | 0.16440195 | 23.47797 | 0.049197 | 34.53 |
| 300310 | 2016 | 0.087 | 0.05 | 0.405465 | 0.16440195 | 21.90236 | 0.070595 | 8.38  |
| 600894 | 2016 | 0.031 | 0.05 | 0.405465 | 0.16440195 | 22.98162 | 0.15503  | 56.56 |
| 603002 | 2016 | 0.901 | 0.05 | 0.405465 | 0.16440195 | 21.13588 | 0.025944 | 41.32 |
| 300155 | 2016 | 0.625 | 0.05 | 0.405465 | 0.16440195 | 21.11255 | 0.018555 | 37.38 |
| 600143 | 2016 | 0.762 | 0.05 | 0.405465 | 0.16440195 | 23.73186 | 0.075724 | 18.79 |
| 300297 | 2016 | 1.036 | 0.05 | 0.405465 | 0.16440195 | 22.56409 | 0.08986  | 15.23 |
| 2465   | 2016 | 0.808 | 0.05 | 0.405465 | 0.16440195 | 23.11296 | 0.084362 | 21.22 |
| 300030 | 2016 | 0.331 | 0.05 | 0.405465 | 0.16440195 | 21.10845 | 0.03196  | 23.43 |
| 2152   | 2016 | -0.4  | 0.05 | 0.405465 | 0.16440195 | 23.20036 | 0.100527 | 52.52 |
| 601238 | 2016 | -0.41 | 0.05 | 0.405465 | 0.16440195 | 25.13111 | 0.14042  | 60.63 |
| 2084   | 2016 | -0.1  | 0.05 | 0.405465 | 0.16440195 | 21.24847 | 0.069677 | 30.07 |
| 300219 | 2016 | -0.49 | 0.05 | 0.405465 | 0.16440195 | 21.78051 | 0.072819 | 25.11 |
| 600143 | 2016 | 0.136 | 0.05 | 0.405465 | 0.16440195 | 23.73186 | 0.075724 | 18.79 |
| 2311   | 2016 | 0.483 | 0.05 | 0.405465 | 0.16440195 | 23.05423 | 0.150235 | 59.07 |
| 2709   | 2016 | 0.684 | 0.05 | 0.405465 | 0.16440195 | 21.57144 | 0.24195  | 41.49 |
| 600728 | 2016 | 0.84  | 0.05 | 0.405465 | 0.16440195 | 22.31631 | 0.04529  | 14.17 |
| 600098 | 2016 | 0.85  | 0.05 | 0.405465 | 0.16440195 | 24.28764 | 0.054832 | 62.69 |
| 2030   | 2016 | 0.557 | 0.05 | 0.405465 | 0.16440195 | 22.14388 | 0.053233 | 16.63 |
| 600685 | 2016 | -0.13 | 0.05 | 0.405465 | 0.16440195 | 24.55773 | 0.008327 | 41.65 |
| 2152   | 2016 | 0.335 | 0.05 | 0.405465 | 0.16440195 | 23.20036 | 0.100527 | 52.52 |
| 600143 | 2016 | 0.782 | 0.05 | 0.405465 | 0.16440195 | 23.73186 | 0.075724 | 18.79 |
| 2461   | 2016 | 0.757 | 0.05 | 0.405465 | 0.16440195 | 22.61259 | 0.035619 | 52.03 |
| 300238 | 2016 | 0.824 | 0.05 | 0.405465 | 0.16440195 | 21.21594 | 0.033656 | 20.71 |
| 2420   | 2016 | -0.48 | 0.05 | 0.405465 | 0.16440195 | 22.14619 | 0.008919 | 25.98 |
| 2311   | 2016 | 0.483 | 0.05 | 0.405465 | 0.16440195 | 23.05423 | 0.150235 | 59.07 |
| 2572   | 2016 | -0.56 | 0.05 | 0.405465 | 0.16440195 | 22.39815 | 0.159696 | 24.26 |
| 300098 | 2016 | 0.58  | 0.05 | 0.405465 | 0.16440195 | 22.29816 | 0.083557 | 35.65 |
| 2709   | 2016 | 0.56  | 0.05 | 0.405465 | 0.16440195 | 21.57144 | 0.24195  | 41.49 |
| 2709   | 2016 | 0.684 | 0.05 | 0.405465 | 0.16440195 | 21.29682 | 0.24195  | 41.49 |
| 2709   | 2016 | 0.55  | 0.05 | 0.405465 | 0.16440195 | 21.57144 | 0.24195  | 41.49 |
| 2572   | 2016 | -0.05 | 0.05 | 0.405465 | 0.16440195 | 22.39815 | 0.159696 | 24.26 |
| 2308   | 2016 | 1.168 | 0.05 | 0.405465 | 0.16440195 | 21.86188 | 0.077716 | 39.09 |

|        |      |       |      |          |            |          |          |       |
|--------|------|-------|------|----------|------------|----------|----------|-------|
| 600029 | 2016 | -0.98 | 0.05 | 0.405465 | 0.16440195 | 25.74206 | 0.107626 | 41.14 |
| 601238 | 2016 | -0.14 | 0.05 | 0.405465 | 0.16440195 | 25.13111 | 0.14042  | 60.63 |
| 300219 | 2016 | -0.6  | 0.05 | 0.405465 | 0.16440195 | 21.92561 | 0.072819 | 25.11 |
| 2045   | 2016 | 0.482 | 0.05 | 0.405465 | 0.16440195 | 21.82333 | 0.039092 | 21.88 |
| 2311   | 2016 | 0.483 | 0.05 | 0.405465 | 0.16440195 | 23.05423 | 0.150235 | 59.07 |
| 2311   | 2016 | 0.483 | 0.05 | 0.405465 | 0.16440195 | 23.05423 | 0.150235 | 59.07 |
| 300147 | 2016 | -0.21 | 0.05 | 0.405465 | 0.16440195 | 22.8013  | 0.0265   | 34.11 |
| 600143 | 2016 | 0.136 | 0.05 | 0.405465 | 0.16440195 | 23.73186 | 0.075724 | 18.79 |
| 601238 | 2016 | -0.14 | 0.05 | 0.405465 | 0.16440195 | 24.94186 | 0.14042  | 60.63 |
| 2308   | 2016 | -0.16 | 0.05 | 0.405465 | 0.16440195 | 21.7931  | 0.077716 | 39.09 |
| 600332 | 2016 | -0.07 | 0.05 | 0.405465 | 0.16440195 | 23.9774  | 0.088291 | 45.04 |
| 600098 | 2016 | -0.47 | 0.05 | 0.405465 | 0.16440195 | 24.28764 | 0.054832 | 62.69 |
| 601238 | 2016 | -0.14 | 0.05 | 0.405465 | 0.16440195 | 25.13111 | 0.14042  | 60.63 |
| 600894 | 2016 | -0.29 | 0.05 | 0.405465 | 0.16440195 | 22.98162 | 0.15503  | 56.56 |
| 2027   | 2016 | 0.433 | 0.05 | 0.405465 | 0.16440195 | 23.21887 | 0.302158 | 23.34 |
| 300147 | 2016 | -0.43 | 0.05 | 0.405465 | 0.16440195 | 22.8013  | 0.0265   | 34.11 |
| 300310 | 2016 | 0.572 | 0.05 | 0.405465 | 0.16440195 | 21.90236 | 0.070595 | 8.38  |
| 300310 | 2016 | 0.915 | 0.05 | 0.405465 | 0.16440195 | 21.78106 | 0.070595 | 8.38  |
| 2030   | 2016 | -0.11 | 0.05 | 0.405465 | 0.16440195 | 22.14388 | 0.053233 | 16.63 |
| 300482 | 2016 | 0.335 | 0.05 | 0.405465 | 0.16440195 | 20.729   | 0.170233 | 24.83 |
| 300219 | 2016 | -0.31 | 0.05 | 0.405465 | 0.16440195 | 21.92561 | 0.072819 | 25.11 |
| 2311   | 2016 | 0.133 | 0.05 | 0.405465 | 0.16440195 | 23.05423 | 0.150235 | 59.07 |
| 2030   | 2016 | 0.606 | 0.05 | 0.405465 | 0.16440195 | 22.14388 | 0.053233 | 16.63 |
| 2311   | 2016 | 0.483 | 0.05 | 0.405465 | 0.16440195 | 23.05423 | 0.150235 | 59.07 |
| 600332 | 2016 | 0.456 | 0.05 | 0.405465 | 0.16440195 | 23.9774  | 0.088291 | 45.04 |
| 523    | 2016 | -0.54 | 0.05 | 0.405465 | 0.16440195 | 22.15125 | 0.021843 | 30.04 |
| 300030 | 2016 | -0.03 | 0.05 | 0.405465 | 0.16440195 | 21.10845 | 0.03196  | 23.43 |
| 300147 | 2016 | 0.753 | 0.05 | 0.405465 | 0.16440195 | 22.8013  | 0.0265   | 34.11 |
| 2084   | 2016 | 0.193 | 0.05 | 0.405465 | 0.16440195 | 21.34856 | 0.069677 | 30.07 |
| 600894 | 2016 | -0.39 | 0.05 | 0.405465 | 0.16440195 | 22.98162 | 0.15503  | 56.56 |
| 2420   | 2016 | -0.71 | 0.05 | 0.405465 | 0.16440195 | 22.14619 | 0.008919 | 25.98 |
| 2465   | 2016 | 0.808 | 0.05 | 0.405465 | 0.16440195 | 23.11296 | 0.084362 | 21.22 |
| 300177 | 2016 | 0.346 | 0.05 | 0.405465 | 0.16440195 | 21.4448  | 0.011106 | 26.18 |
| 2060   | 2016 | -0.07 | 0.05 | 0.405465 | 0.16440195 | 23.47797 | 0.049197 | 34.53 |
| 601238 | 2016 | -0.14 | 0.05 | 0.405465 | 0.16440195 | 25.13111 | 0.14042  | 60.63 |
| 300335 | 2016 | -0.06 | 0.05 | 0.405465 | 0.16440195 | 21.68496 | 0.116416 | 14.07 |
| 2420   | 2016 | -0.48 | 0.05 | 0.405465 | 0.16440195 | 22.14619 | 0.008919 | 25.98 |
| 600685 | 2016 | -0.15 | 0.05 | 0.405465 | 0.16440195 | 24.55773 | 0.008327 | 41.65 |
| 2311   | 2016 | 0.483 | 0.05 | 0.405465 | 0.16440195 | 23.05423 | 0.150235 | 59.07 |
| 600332 | 2016 | -0.87 | 0.05 | 0.405465 | 0.16440195 | 23.9774  | 0.088291 | 45.04 |
| 2084   | 2016 | 0.193 | 0.05 | 0.405465 | 0.16440195 | 21.34856 | 0.069677 | 30.07 |
| 300335 | 2016 | -0.4  | 0.05 | 0.405465 | 0.16440195 | 21.68496 | 0.116416 | 14.07 |
| 600098 | 2016 | 0.85  | 0.05 | 0.405465 | 0.16440195 | 24.28764 | 0.054832 | 62.69 |
| 300438 | 2016 | 0.004 | 0.05 | 0.405465 | 0.16440195 | 21.00866 | 0.144141 | 34.96 |
| 600143 | 2016 | 0.684 | 0.05 | 0.405465 | 0.16440195 | 23.73186 | 0.075724 | 18.79 |
| 600894 | 2016 | -0.63 | 0.05 | 0.405465 | 0.16440195 | 22.98162 | 0.15503  | 56.56 |
| 2311   | 2016 | 0.483 | 0.05 | 0.405465 | 0.16440195 | 23.05423 | 0.150235 | 59.07 |
| 2308   | 2016 | 1.137 | 0.05 | 0.405465 | 0.16440195 | 21.86188 | 0.077716 | 39.09 |
| 601238 | 2016 | -0.14 | 0.05 | 0.405465 | 0.16440195 | 25.13111 | 0.14042  | 60.63 |
| 601238 | 2016 | -0.25 | 0.05 | 0.405465 | 0.16440195 | 25.13111 | 0.14042  | 60.63 |
| 601238 | 2016 | -0.52 | 0.05 | 0.405465 | 0.16440195 | 25.13111 | 0.14042  | 60.63 |
| 601238 | 2016 | -0.03 | 0.05 | 0.405465 | 0.16440195 | 25.13111 | 0.14042  | 60.63 |
| 601238 | 2016 | -0.52 | 0.05 | 0.405465 | 0.16440195 | 25.13111 | 0.14042  | 60.63 |
| 300424 | 2016 | 0.08  | 0.05 | 0.405465 | 0.16440195 | 20.82805 | 0.068411 | 22.07 |



|        |      |       |      |          |            |          |          |       |
|--------|------|-------|------|----------|------------|----------|----------|-------|
| 2045   | 2016 | 0.03  | 0.05 | 0.405465 | 0.16440195 | 21.82333 | 0.039092 | 21.88 |
| 300424 | 2016 | 0.293 | 0.05 | 0.405465 | 0.16440195 | 20.82805 | 0.068411 | 22.07 |
| 300297 | 2016 | 1.162 | 0.05 | 0.405465 | 0.16440195 | 22.56409 | 0.08986  | 15.23 |
| 600143 | 2016 | 0.602 | 0.05 | 0.405465 | 0.16440195 | 23.73186 | 0.075724 | 18.79 |
| 601238 | 2016 | -0.14 | 0.05 | 0.405465 | 0.16440195 | 25.13111 | 0.14042  | 60.63 |
| 2572   | 2016 | -0.43 | 0.05 | 0.405465 | 0.16440195 | 22.39815 | 0.159696 | 24.26 |
| 429    | 2016 | 0.354 | 0.05 | 0.405465 | 0.16440195 | 23.19805 | 0.132567 | 24.55 |
| 600332 | 2016 | 0.456 | 0.05 | 0.405465 | 0.16440195 | 23.9774  | 0.088291 | 45.04 |
| 603309 | 2016 | -0.66 | 0.05 | 0.405465 | 0.16440195 | 20.6657  | 0.091118 | 37.39 |
| 2045   | 2016 | -0.07 | 0.05 | 0.405465 | 0.16440195 | 21.82333 | 0.039092 | 21.88 |
| 601238 | 2016 | -0.14 | 0.05 | 0.405465 | 0.16440195 | 25.13111 | 0.14042  | 60.63 |
| 300147 | 2016 | -0.21 | 0.05 | 0.405465 | 0.16440195 | 22.8013  | 0.0265   | 34.11 |
| 2030   | 2016 | 0.241 | 0.05 | 0.405465 | 0.16440195 | 22.14388 | 0.053233 | 16.63 |
| 2420   | 2016 | -0.71 | 0.05 | 0.405465 | 0.16440195 | 22.14619 | 0.008919 | 25.98 |
| 2465   | 2016 | 0.467 | 0.05 | 0.405465 | 0.16440195 | 23.11296 | 0.084362 | 21.22 |
| 2084   | 2016 | -0.11 | 0.05 | 0.405465 | 0.16440195 | 21.34856 | 0.069677 | 30.07 |
| 601238 | 2016 | -0.22 | 0.05 | 0.405465 | 0.16440195 | 25.13111 | 0.14042  | 60.63 |
| 600332 | 2016 | -0.87 | 0.05 | 0.405465 | 0.16440195 | 23.9774  | 0.088291 | 45.04 |
| 300219 | 2016 | -0.6  | 0.05 | 0.405465 | 0.16440195 | 21.92561 | 0.072819 | 25.11 |
| 300238 | 2016 | 0.824 | 0.05 | 0.405465 | 0.16440195 | 21.21594 | 0.033656 | 20.71 |
| 2465   | 2016 | 1.372 | 0.05 | 0.405465 | 0.16440195 | 23.11296 | 0.084362 | 21.22 |
| 2683   | 2016 | -0.53 | 0.05 | 0.405465 | 0.16440195 | 22.05497 | 0.021804 | 21.13 |
| 603309 | 2016 | -0.66 | 0.05 | 0.405465 | 0.16440195 | 20.69557 | 0.091118 | 37.39 |
| 300335 | 2016 | 0.018 | 0.05 | 0.405465 | 0.16440195 | 21.68496 | 0.116416 | 14.07 |
| 2311   | 2016 | 0.483 | 0.05 | 0.405465 | 0.16440195 | 23.05423 | 0.150235 | 59.07 |
| 2461   | 2016 | -0.02 | 0.05 | 0.405465 | 0.16440195 | 22.61259 | 0.035619 | 52.03 |
| 600332 | 2016 | -0.87 | 0.05 | 0.405465 | 0.16440195 | 23.9774  | 0.088291 | 45.04 |
| 2084   | 2016 | -0.16 | 0.05 | 0.405465 | 0.16440195 | 21.34856 | 0.069677 | 30.07 |
| 600894 | 2016 | -0.44 | 0.05 | 0.405465 | 0.16440195 | 22.51779 | 0.15503  | 56.56 |
| 600029 | 2016 | -0.59 | 0.05 | 0.405465 | 0.16440195 | 25.74206 | 0.107626 | 41.14 |
| 300177 | 2016 | 0.587 | 0.05 | 0.405465 | 0.16440195 | 21.4448  | 0.011106 | 26.18 |
| 2209   | 2016 | 0.068 | 0.05 | 0.405465 | 0.16440195 | 21.21854 | -0.07399 | 19.55 |
| 523    | 2016 | 0.786 | 0.05 | 0.405465 | 0.16440195 | 22.15125 | 0.021843 | 30.04 |
| 2152   | 2016 | -0.26 | 0.05 | 0.405465 | 0.16440195 | 23.20036 | 0.100527 | 52.52 |
| 2169   | 2016 | -0.05 | 0.05 | 0.405465 | 0.16440195 | 22.03596 | 0.050174 | 19.3  |
| 600894 | 2016 | -0.11 | 0.05 | 0.405465 | 0.16440195 | 22.98162 | 0.15503  | 56.56 |
| 2308   | 2016 | 1.137 | 0.05 | 0.405465 | 0.16440195 | 21.86188 | 0.077716 | 39.09 |
| 2420   | 2016 | -0.71 | 0.05 | 0.405465 | 0.16440195 | 22.14619 | 0.008919 | 25.98 |
| 300310 | 2016 | 0.306 | 0.05 | 0.405465 | 0.16440195 | 21.90236 | 0.070595 | 8.38  |
| 2311   | 2016 | -0.84 | 0.05 | 0.405465 | 0.16440195 | 23.05423 | 0.150235 | 59.07 |
| 300177 | 2016 | 1.141 | 0.05 | 0.405465 | 0.16440195 | 21.4448  | 0.011106 | 26.18 |
| 2152   | 2016 | 0.832 | 0.05 | 0.405465 | 0.16440195 | 23.20036 | 0.100527 | 52.52 |
| 2461   | 2016 | 0.026 | 0.05 | 0.405465 | 0.16440195 | 22.61259 | 0.035619 | 52.03 |
| 2152   | 2016 | -0.05 | 0.05 | 0.405465 | 0.16440195 | 23.20036 | 0.100527 | 52.52 |
| 2311   | 2016 | 0.331 | 0.05 | 0.405465 | 0.16440195 | 23.05423 | 0.150235 | 59.07 |
| 2311   | 2016 | 0.483 | 0.05 | 0.405465 | 0.16440195 | 23.05423 | 0.150235 | 59.07 |
| 2461   | 2016 | -0.57 | 0.05 | 0.405465 | 0.16440195 | 22.41194 | 0.035619 | 52.03 |
| 2045   | 2016 | -0.33 | 0.05 | 0.405465 | 0.16440195 | 21.82333 | 0.039092 | 21.88 |
| 600029 | 2016 | -0.61 | 0.05 | 0.405465 | 0.16440195 | 25.74206 | 0.107626 | 41.14 |
| 2084   | 2016 | 0.193 | 0.05 | 0.405465 | 0.16440195 | 21.34856 | 0.069677 | 30.07 |
| 300238 | 2016 | 0.824 | 0.05 | 0.405465 | 0.16440195 | 21.21594 | 0.033656 | 20.71 |
| 300335 | 2016 | -0.57 | 0.05 | 0.405465 | 0.16440195 | 21.68496 | 0.116416 | 14.07 |
| 2177   | 2016 | 1.13  | 0.05 | 0.405465 | 0.16440195 | 21.49719 | 0.013863 | 20.81 |
| 2663   | 2016 | -0.62 | 0.05 | 0.405465 | 0.16440195 | 22.76429 | 0.023863 | 23.99 |

|        |      |       |      |          |            |          |          |       |
|--------|------|-------|------|----------|------------|----------|----------|-------|
| 2678   | 2016 | -0.11 | 0.05 | 0.405465 | 0.16440195 | 21.78621 | 0.074578 | 74.18 |
| 601238 | 2016 | -0.14 | 0.05 | 0.405465 | 0.16440195 | 25.13111 | 0.14042  | 60.63 |
| 2060   | 2016 | -0.07 | 0.05 | 0.405465 | 0.16440195 | 23.02743 | 0.049197 | 34.53 |
| 300098 | 2016 | 0.58  | 0.05 | 0.405465 | 0.16440195 | 22.29816 | 0.083557 | 35.65 |
| 300147 | 2016 | 0.392 | 0.05 | 0.405465 | 0.16440195 | 22.8013  | 0.0265   | 34.11 |
| 2060   | 2016 | 0.165 | 0.05 | 0.405465 | 0.16440195 | 23.47797 | 0.049197 | 34.53 |
| 2060   | 2016 | 0.733 | 0.05 | 0.405465 | 0.16440195 | 23.47797 | 0.049197 | 34.53 |
| 2709   | 2016 | 0.607 | 0.05 | 0.405465 | 0.16440195 | 21.57144 | 0.24195  | 41.49 |
| 300448 | 2016 | 1.075 | 0.05 | 0.405465 | 0.16440195 | 20.6164  | 0.132845 | 38.99 |
| 600332 | 2016 | -0.15 | 0.05 | 0.405465 | 0.16440195 | 23.9774  | 0.088291 | 45.04 |
| 300177 | 2016 | 1.671 | 0.05 | 0.405465 | 0.16440195 | 21.4448  | 0.011106 | 26.18 |
| 600894 | 2016 | -0.45 | 0.05 | 0.405465 | 0.16440195 | 22.98162 | 0.15503  | 56.56 |
| 601238 | 2016 | 0.292 | 0.05 | 0.405465 | 0.16440195 | 25.13111 | 0.14042  | 60.63 |
| 300482 | 2016 | 0.335 | 0.05 | 0.405465 | 0.16440195 | 20.729   | 0.170233 | 24.83 |
| 300219 | 2016 | -0.1  | 0.05 | 0.405465 | 0.16440195 | 21.92561 | 0.072819 | 25.11 |
| 600332 | 2016 | -0.16 | 0.05 | 0.405465 | 0.16440195 | 23.9774  | 0.088291 | 45.04 |
| 300098 | 2016 | 0.566 | 0.05 | 0.405465 | 0.16440195 | 22.29816 | 0.083557 | 35.65 |
| 2683   | 2016 | -0.53 | 0.05 | 0.405465 | 0.16440195 | 22.44957 | 0.021804 | 21.13 |
| 2683   | 2016 | -0.13 | 0.05 | 0.405465 | 0.16440195 | 22.44957 | 0.021804 | 21.13 |
| 2060   | 2016 | 0.036 | 0.05 | 0.405465 | 0.16440195 | 23.47797 | 0.049197 | 34.53 |
| 2308   | 2016 | 0.064 | 0.05 | 0.405465 | 0.16440195 | 21.86188 | 0.077716 | 39.09 |
| 300438 | 2016 | 0.666 | 0.05 | 0.405465 | 0.16440195 | 21.36597 | 0.144141 | 34.96 |
| 600894 | 2016 | -0.63 | 0.05 | 0.405465 | 0.16440195 | 22.98162 | 0.15503  | 56.56 |
| 600098 | 2016 | 0.164 | 0.05 | 0.405465 | 0.16440195 | 24.28764 | 0.054832 | 62.69 |
| 2027   | 2016 | -0.89 | 0.05 | 0.405465 | 0.16440195 | 23.21887 | 0.302158 | 23.34 |
| 300177 | 2016 | 0.611 | 0.05 | 0.405465 | 0.16440195 | 21.4448  | 0.011106 | 26.18 |
| 300147 | 2016 | 0.547 | 0.05 | 0.405465 | 0.16440195 | 22.8013  | 0.0265   | 34.11 |
| 600143 | 2016 | 0.736 | 0.05 | 0.405465 | 0.16440195 | 23.73186 | 0.075724 | 18.79 |
| 2169   | 2016 | 0.109 | 0.05 | 0.405465 | 0.16440195 | 22.03596 | 0.050174 | 19.3  |
| 601238 | 2016 | 0.017 | 0.05 | 0.405465 | 0.16440195 | 25.13111 | 0.14042  | 60.63 |
| 861    | 2016 | -0.42 | 0.05 | 0.405465 | 0.16440195 | 22.88601 | 0.074775 | 48.17 |
| 601238 | 2016 | -0.07 | 0.05 | 0.405465 | 0.16440195 | 25.13111 | 0.14042  | 60.63 |
| 2177   | 2016 | 1.093 | 0.05 | 0.405465 | 0.16440195 | 21.49719 | 0.013863 | 20.81 |
| 300448 | 2016 | 1.075 | 0.05 | 0.405465 | 0.16440195 | 20.6164  | 0.132845 | 38.99 |
| 601238 | 2016 | -0.52 | 0.05 | 0.405465 | 0.16440195 | 25.13111 | 0.14042  | 60.63 |
| 523    | 2016 | -0.37 | 0.05 | 0.405465 | 0.16440195 | 22.09791 | 0.021843 | 30.04 |
| 2209   | 2016 | 0.177 | 0.05 | 0.405465 | 0.16440195 | 21.21668 | -0.07399 | 19.55 |
| 601238 | 2016 | -0.52 | 0.05 | 0.405465 | 0.16440195 | 25.13111 | 0.14042  | 60.63 |
| 300310 | 2016 | 0.915 | 0.05 | 0.405465 | 0.16440195 | 21.90236 | 0.070595 | 8.38  |
| 2181   | 2016 | -0.98 | 0.05 | 0.405465 | 0.16440195 | 22.2687  | 0.049059 | 47.46 |
| 2177   | 2016 | 1.264 | 0.05 | 0.405465 | 0.16440195 | 21.64395 | 0.013863 | 20.81 |
| 2152   | 2016 | -0.17 | 0.05 | 0.405465 | 0.16440195 | 23.20036 | 0.100527 | 52.52 |
| 2663   | 2016 | -0.44 | 0.05 | 0.405465 | 0.16440195 | 22.70066 | 0.023863 | 23.99 |
| 600143 | 2016 | 0.747 | 0.05 | 0.405465 | 0.16440195 | 23.73186 | 0.075724 | 18.79 |
| 600098 | 2016 | 0.188 | 0.05 | 0.405465 | 0.16440195 | 24.28764 | 0.054832 | 62.69 |
| 2465   | 2016 | 1.372 | 0.05 | 0.405465 | 0.16440195 | 23.11296 | 0.084362 | 21.22 |
| 600098 | 2016 | 0.176 | 0.05 | 0.405465 | 0.16440195 | 24.28764 | 0.054832 | 62.69 |
| 600098 | 2016 | 0.18  | 0.05 | 0.405465 | 0.16440195 | 23.5966  | 0.054832 | 62.69 |
| 2192   | 2016 | -0.21 | 0.05 | 0.405465 | 0.16440195 | 20.63225 | 0.019667 | 23.65 |
| 603309 | 2016 | -0.66 | 0.05 | 0.405465 | 0.16440195 | 20.69557 | 0.091118 | 37.39 |
| 603309 | 2016 | -0.66 | 0.05 | 0.405465 | 0.16440195 | 20.69557 | 0.091118 | 37.39 |
| 600143 | 2016 | 0.45  | 0.05 | 0.405465 | 0.16440195 | 23.73186 | 0.075724 | 18.79 |
| 429    | 2016 | 0.354 | 0.05 | 0.405465 | 0.16440195 | 23.50037 | 0.132567 | 24.55 |
| 300482 | 2016 | 0.335 | 0.05 | 0.405465 | 0.16440195 | 20.729   | 0.170233 | 24.83 |

|        |      |       |      |          |            |          |          |       |
|--------|------|-------|------|----------|------------|----------|----------|-------|
| 300177 | 2016 | 1.009 | 0.05 | 0.405465 | 0.16440195 | 21.4448  | 0.011106 | 26.18 |
| 600332 | 2016 | 0.456 | 0.05 | 0.405465 | 0.16440195 | 23.9774  | 0.088291 | 45.04 |
| 600332 | 2016 | 0.319 | 0.05 | 0.405465 | 0.16440195 | 23.9774  | 0.088291 | 45.04 |
| 2030   | 2016 | 1.219 | 0.05 | 0.405465 | 0.16440195 | 22.14388 | 0.053233 | 16.63 |
| 300219 | 2016 | -0.43 | 0.05 | 0.405465 | 0.16440195 | 21.92561 | 0.072819 | 25.11 |
| 2030   | 2016 | 0.392 | 0.05 | 0.405465 | 0.16440195 | 22.14388 | 0.053233 | 16.63 |
| 300177 | 2016 | 0.955 | 0.05 | 0.405465 | 0.16440195 | 21.4448  | 0.011106 | 26.18 |
| 300098 | 2016 | -0.15 | 0.05 | 0.405465 | 0.16440195 | 22.29816 | 0.083557 | 35.65 |
| 600894 | 2016 | -0.11 | 0.05 | 0.405465 | 0.16440195 | 22.98162 | 0.15503  | 56.56 |
| 2311   | 2016 | 0.483 | 0.05 | 0.405465 | 0.16440195 | 23.05423 | 0.150235 | 59.07 |
| 300147 | 2016 | -0.21 | 0.05 | 0.405465 | 0.16440195 | 22.8013  | 0.0265   | 34.11 |
| 300424 | 2016 | 0.293 | 0.05 | 0.405465 | 0.16440195 | 20.82805 | 0.068411 | 22.07 |
| 601238 | 2016 | -0.14 | 0.05 | 0.405465 | 0.16440195 | 25.13111 | 0.14042  | 60.63 |
| 2027   | 2016 | -0.43 | 0.05 | 0.405465 | 0.16440195 | 23.21887 | 0.302158 | 23.34 |
| 601238 | 2016 | -0.14 | 0.05 | 0.405465 | 0.16440195 | 25.13111 | 0.14042  | 60.63 |
| 601238 | 2016 | -0.52 | 0.05 | 0.405465 | 0.16440195 | 25.13111 | 0.14042  | 60.63 |
| 600098 | 2016 | 0.164 | 0.05 | 0.405465 | 0.16440195 | 24.28764 | 0.054832 | 62.69 |
| 300438 | 2016 | 0.114 | 0.05 | 0.405465 | 0.16440195 | 21.36597 | 0.144141 | 34.96 |
| 600098 | 2016 | 0.164 | 0.05 | 0.405465 | 0.16440195 | 24.28764 | 0.054832 | 62.69 |
| 300335 | 2016 | -0.64 | 0.05 | 0.405465 | 0.16440195 | 21.36525 | 0.116416 | 14.07 |
| 600332 | 2016 | 0.456 | 0.05 | 0.405465 | 0.16440195 | 23.9774  | 0.088291 | 45.04 |
| 601238 | 2016 | -0.52 | 0.05 | 0.405465 | 0.16440195 | 25.13111 | 0.14042  | 60.63 |
| 429    | 2016 | 0.354 | 0.05 | 0.405465 | 0.16440195 | 23.50037 | 0.132567 | 24.55 |
| 2678   | 2016 | -0.07 | 0.05 | 0.405465 | 0.16440195 | 21.78621 | 0.074578 | 74.18 |
| 300030 | 2016 | 0.331 | 0.05 | 0.405465 | 0.16440195 | 21.10845 | 0.03196  | 23.43 |
| 2311   | 2016 | 0.068 | 0.05 | 0.405465 | 0.16440195 | 23.05423 | 0.150235 | 59.07 |
| 2420   | 2016 | 0.613 | 0.05 | 0.405465 | 0.16440195 | 21.92153 | 0.008919 | 25.98 |
| 2169   | 2016 | 0.352 | 0.05 | 0.405465 | 0.16440195 | 22.03596 | 0.050174 | 19.3  |
| 300482 | 2016 | 0.613 | 0.05 | 0.405465 | 0.16440195 | 20.729   | 0.170233 | 24.83 |
| 2045   | 2016 | 0.227 | 0.05 | 0.405465 | 0.16440195 | 21.82333 | 0.039092 | 21.88 |
| 600332 | 2016 | -0.46 | 0.05 | 0.405465 | 0.16440195 | 23.9774  | 0.088291 | 45.04 |
| 600029 | 2016 | -0.98 | 0.05 | 0.405465 | 0.16440195 | 25.74206 | 0.107626 | 41.14 |
| 600332 | 2016 | 0.456 | 0.05 | 0.405465 | 0.16440195 | 23.9774  | 0.088291 | 45.04 |
| 2308   | 2016 | 1.09  | 0.05 | 0.405465 | 0.16440195 | 21.86188 | 0.077716 | 39.09 |
| 600332 | 2016 | 0.37  | 0.05 | 0.405465 | 0.16440195 | 23.9774  | 0.088291 | 45.04 |
| 600332 | 2016 | 0.113 | 0.05 | 0.405465 | 0.16440195 | 23.9774  | 0.088291 | 45.04 |
| 2461   | 2016 | -0.57 | 0.05 | 0.405465 | 0.16440195 | 22.61259 | 0.035619 | 52.03 |
| 601238 | 2016 | -0.14 | 0.05 | 0.405465 | 0.16440195 | 25.13111 | 0.14042  | 60.63 |
| 2030   | 2016 | -0.11 | 0.05 | 0.405465 | 0.16440195 | 22.14388 | 0.053233 | 16.63 |
| 600728 | 2016 | 0.425 | 0.05 | 0.405465 | 0.16440195 | 21.98154 | 0.04529  | 14.17 |
| 2465   | 2016 | 0.213 | 0.05 | 0.405465 | 0.16440195 | 23.11296 | 0.084362 | 21.22 |
| 2465   | 2016 | 0.047 | 0.05 | 0.405465 | 0.16440195 | 22.87172 | 0.084362 | 21.22 |
| 2420   | 2016 | -0.71 | 0.05 | 0.405465 | 0.16440195 | 22.14619 | 0.008919 | 25.98 |
| 300219 | 2016 | -0.35 | 0.05 | 0.405465 | 0.16440195 | 21.92561 | 0.072819 | 25.11 |
| 2030   | 2016 | 0.392 | 0.05 | 0.405465 | 0.16440195 | 22.14388 | 0.053233 | 16.63 |
| 300177 | 2016 | 1.037 | 0.05 | 0.405465 | 0.16440195 | 21.4448  | 0.011106 | 26.18 |
| 2030   | 2016 | 0.06  | 0.05 | 0.405465 | 0.16440195 | 22.14388 | 0.053233 | 16.63 |
| 2678   | 2016 | 0.014 | 0.05 | 0.405465 | 0.16440195 | 21.78621 | 0.074578 | 74.18 |
| 2544   | 2016 | 0.336 | 0.05 | 0.405465 | 0.16440195 | 22.05749 | 0.07934  | 34.53 |
| 601238 | 2016 | -0.52 | 0.05 | 0.405465 | 0.16440195 | 25.13111 | 0.14042  | 60.63 |
| 601238 | 2016 | -0.09 | 0.05 | 0.405465 | 0.16440195 | 25.13111 | 0.14042  | 60.63 |
| 2663   | 2016 | -0.28 | 0.05 | 0.405465 | 0.16440195 | 22.76429 | 0.023863 | 23.99 |
| 2544   | 2016 | 0.606 | 0.05 | 0.405465 | 0.16440195 | 22.05749 | 0.07934  | 34.53 |
| 2544   | 2016 | 0.606 | 0.05 | 0.405465 | 0.16440195 | 22.01775 | 0.07934  | 34.53 |

|        |      |       |      |          |            |          |          |       |
|--------|------|-------|------|----------|------------|----------|----------|-------|
| 2311   | 2016 | -0.84 | 0.05 | 0.405465 | 0.16440195 | 23.05423 | 0.150235 | 59.07 |
| 2192   | 2016 | -0.21 | 0.05 | 0.405465 | 0.16440195 | 20.63225 | 0.019667 | 23.65 |
| 2169   | 2016 | 0.412 | 0.05 | 0.405465 | 0.16440195 | 22.03596 | 0.050174 | 19.3  |
| 600098 | 2016 | 0.164 | 0.05 | 0.405465 | 0.16440195 | 24.28764 | 0.054832 | 62.69 |
| 603309 | 2016 | -0.66 | 0.05 | 0.405465 | 0.16440195 | 20.69557 | 0.091118 | 37.39 |
| 2465   | 2016 | 1.372 | 0.05 | 0.405465 | 0.16440195 | 23.11296 | 0.084362 | 21.22 |
| 2027   | 2016 | -0.24 | 0.05 | 0.405465 | 0.16440195 | 23.21887 | 0.302158 | 23.34 |
| 2656   | 2016 | 0.518 | 0.05 | 0.405465 | 0.16440195 | 21.79713 | -0.17915 | 31.03 |
| 2709   | 2016 | 0.342 | 0.05 | 0.405465 | 0.16440195 | 21.57144 | 0.24195  | 41.49 |
| 2152   | 2016 | 0.169 | 0.05 | 0.405465 | 0.16440195 | 23.20036 | 0.100527 | 52.52 |
| 300310 | 2016 | 0.087 | 0.05 | 0.405465 | 0.16440195 | 21.90236 | 0.070595 | 8.38  |
| 300219 | 2016 | -0.6  | 0.05 | 0.405465 | 0.16440195 | 21.92561 | 0.072819 | 25.11 |
| 2465   | 2016 | 0.577 | 0.05 | 0.405465 | 0.16440195 | 23.11296 | 0.084362 | 21.22 |
| 600029 | 2016 | -0.98 | 0.05 | 0.405465 | 0.16440195 | 25.74206 | 0.107626 | 41.14 |
| 2461   | 2016 | 0.757 | 0.05 | 0.405465 | 0.16440195 | 22.61259 | 0.035619 | 52.03 |
| 2656   | 2016 | -0.14 | 0.05 | 0.405465 | 0.16440195 | 21.79713 | -0.17915 | 31.03 |
| 300482 | 2016 | 0.335 | 0.05 | 0.405465 | 0.16440195 | 20.729   | 0.170233 | 24.83 |
| 600098 | 2016 | 0.176 | 0.05 | 0.405465 | 0.16440195 | 24.28764 | 0.054832 | 62.69 |
| 600098 | 2016 | 0.164 | 0.05 | 0.405465 | 0.16440195 | 24.28764 | 0.054832 | 62.69 |
| 2420   | 2016 | -0.42 | 0.05 | 0.405465 | 0.16440195 | 22.14619 | 0.008919 | 25.98 |
| 300219 | 2016 | 0.464 | 0.05 | 0.405465 | 0.16440195 | 21.92561 | 0.072819 | 25.11 |
| 2420   | 2016 | -0.71 | 0.05 | 0.405465 | 0.16440195 | 22.14619 | 0.008919 | 25.98 |
| 523    | 2016 | -0.33 | 0.05 | 0.405465 | 0.16440195 | 22.15125 | 0.021843 | 30.04 |
| 601238 | 2016 | -0.35 | 0.05 | 0.405465 | 0.16440195 | 25.13111 | 0.14042  | 60.63 |
| 600728 | 2016 | 0.496 | 0.05 | 0.405465 | 0.16440195 | 22.31631 | 0.04529  | 14.17 |
| 300177 | 2016 | 1.006 | 0.05 | 0.405465 | 0.16440195 | 21.4448  | 0.011106 | 26.18 |
| 2169   | 2016 | -0.05 | 0.05 | 0.405465 | 0.16440195 | 22.03596 | 0.050174 | 19.3  |
| 2030   | 2016 | 1.142 | 0.05 | 0.405465 | 0.16440195 | 22.14388 | 0.053233 | 16.63 |
| 300030 | 2016 | 0.391 | 0.05 | 0.405465 | 0.16440195 | 21.10845 | 0.03196  | 23.43 |
| 2544   | 2016 | 0.364 | 0.05 | 0.405465 | 0.16440195 | 22.05749 | 0.07934  | 34.53 |
| 2311   | 2016 | 0.483 | 0.05 | 0.405465 | 0.16440195 | 23.05423 | 0.150235 | 59.07 |
| 600332 | 2016 | -0.21 | 0.05 | 0.405465 | 0.16440195 | 23.9774  | 0.088291 | 45.04 |
| 600143 | 2016 | 0.798 | 0.05 | 0.405465 | 0.16440195 | 23.73186 | 0.075724 | 18.79 |
| 2084   | 2016 | -0.16 | 0.05 | 0.405465 | 0.16440195 | 21.34856 | 0.069677 | 30.07 |
| 600685 | 2016 | -0.15 | 0.05 | 0.405465 | 0.16440195 | 24.55773 | 0.008327 | 41.65 |
| 2177   | 2016 | 1.397 | 0.05 | 0.405465 | 0.16440195 | 21.49719 | 0.013863 | 20.81 |
| 300155 | 2016 | 0.625 | 0.05 | 0.405465 | 0.16440195 | 21.11255 | 0.018555 | 37.38 |
| 2420   | 2016 | -0.05 | 0.05 | 0.405465 | 0.16440195 | 22.14619 | 0.008919 | 25.98 |
| 2709   | 2016 | 0.342 | 0.05 | 0.405465 | 0.16440195 | 21.57144 | 0.24195  | 41.49 |
| 2709   | 2016 | 0.284 | 0.05 | 0.405465 | 0.16440195 | 21.57144 | 0.24195  | 41.49 |
| 2209   | 2016 | 0.056 | 0.05 | 0.405465 | 0.16440195 | 21.21668 | -0.07399 | 19.55 |
| 300448 | 2016 | 0.523 | 0.05 | 0.405465 | 0.16440195 | 20.6164  | 0.132845 | 38.99 |
| 300335 | 2016 | -0.28 | 0.05 | 0.405465 | 0.16440195 | 21.68496 | 0.116416 | 14.07 |
| 300424 | 2016 | 0.172 | 0.05 | 0.405465 | 0.16440195 | 20.82805 | 0.068411 | 22.07 |
| 2192   | 2016 | -0.05 | 0.05 | 0.405465 | 0.16440195 | 20.63225 | 0.019667 | 23.65 |
| 2030   | 2016 | -0.11 | 0.05 | 0.405465 | 0.16440195 | 22.14388 | 0.053233 | 16.63 |
| 300335 | 2016 | 0.018 | 0.05 | 0.405465 | 0.16440195 | 21.68496 | 0.116416 | 14.07 |
| 2045   | 2016 | -0.23 | 0.05 | 0.405465 | 0.16440195 | 21.73709 | 0.039092 | 21.88 |
| 2045   | 2016 | 0.064 | 0.05 | 0.405465 | 0.16440195 | 21.82333 | 0.039092 | 21.88 |
| 2209   | 2016 | 0.056 | 0.05 | 0.405465 | 0.16440195 | 21.21668 | -0.07399 | 19.55 |
| 603002 | 2016 | 0.901 | 0.05 | 0.405465 | 0.16440195 | 21.13588 | 0.025944 | 41.32 |
| 2572   | 2016 | -0.69 | 0.05 | 0.405465 | 0.16440195 | 22.21332 | 0.159696 | 24.26 |
| 300448 | 2016 | 0.339 | 0.05 | 0.405465 | 0.16440195 | 20.6164  | 0.132845 | 38.99 |
| 2045   | 2016 | 0.108 | 0.05 | 0.405465 | 0.16440195 | 21.82333 | 0.039092 | 21.88 |

|        |      |       |      |          |            |          |          |       |
|--------|------|-------|------|----------|------------|----------|----------|-------|
| 2709   | 2016 | 0.684 | 0.05 | 0.405465 | 0.16440195 | 21.57144 | 0.24195  | 41.49 |
| 600332 | 2016 | 0.456 | 0.05 | 0.405465 | 0.16440195 | 23.9774  | 0.088291 | 45.04 |
| 300238 | 2016 | 0.824 | 0.05 | 0.405465 | 0.16440195 | 21.16815 | 0.033656 | 20.71 |
| 2311   | 2016 | 0.14  | 0.05 | 0.405465 | 0.16440195 | 23.05423 | 0.150235 | 59.07 |
| 300030 | 2016 | 0.259 | 0.05 | 0.405465 | 0.16440195 | 21.00352 | 0.03196  | 23.43 |
| 300297 | 2016 | 1.036 | 0.05 | 0.405465 | 0.16440195 | 22.56409 | 0.08986  | 15.23 |
| 2411   | 2016 | -0.48 | 0.03 | 0.025156 | 0.00063282 | 23.40853 | 0.113677 | 37.98 |
| 2411   | 2016 | -0.39 | 0.03 | 0.025156 | 0.00063282 | 23.61706 | 0.113677 | 37.98 |
| 2411   | 2016 | 0.398 | 0.03 | 0.025156 | 0.00063282 | 23.61706 | 0.113677 | 37.98 |
| 2411   | 2016 | -0.51 | 0.03 | 0.025156 | 0.00063282 | 23.61706 | 0.113677 | 37.98 |
| 2411   | 2016 | -0.39 | 0.03 | 0.025156 | 0.00063282 | 23.61706 | 0.113677 | 37.98 |
| 2411   | 2016 | -0.28 | 0.03 | 0.025156 | 0.00063282 | 23.61706 | 0.113677 | 37.98 |
| 2411   | 2016 | -0.15 | 0.03 | 0.025156 | 0.00063282 | 23.61706 | 0.113677 | 37.98 |
| 2411   | 2016 | 0.173 | 0.03 | 0.025156 | 0.00063282 | 23.61706 | 0.113677 | 37.98 |
| 2411   | 2016 | -0.39 | 0.03 | 0.025156 | 0.00063282 | 23.61706 | 0.113677 | 37.98 |
| 2411   | 2016 | -0.39 | 0.03 | 0.025156 | 0.00063282 | 23.61706 | 0.113677 | 37.98 |
| 923    | 2016 | -0.85 | 0    | 0.239229 | 0.05723074 | 21.06625 | 0.005127 | 35.54 |
| 923    | 2016 | -0.85 | 0    | 0.239229 | 0.05723074 | 21.06625 | 0.005127 | 35.54 |
| 923    | 2016 | -0.85 | 0    | 0.239229 | 0.05723074 | 21.06625 | 0.005127 | 35.54 |
| 510    | 2016 | 0.509 | 0.01 | 0.973032 | 0.94679212 | 20.83325 | 0.064102 | 10    |
| 600331 | 2016 | 0.037 | 0.01 | 0.973032 | 0.94679212 | 23.05329 | 0.025885 | 26.88 |
| 510    | 2016 | 0.509 | 0.01 | 0.973032 | 0.94679212 | 21.00219 | 0.064102 | 10    |
| 510    | 2016 | 0.509 | 0.01 | 0.973032 | 0.94679212 | 21.00219 | 0.064102 | 10    |
| 600331 | 2016 | 0.037 | 0.01 | 0.973032 | 0.94679212 | 23.05329 | 0.025885 | 26.88 |
| 510    | 2016 | 0.509 | 0.01 | 0.973032 | 0.94679212 | 21.00219 | 0.064102 | 10    |
| 510    | 2016 | 0.509 | 0.01 | 0.973032 | 0.94679212 | 21.00219 | 0.064102 | 10    |
| 510    | 2016 | 0.509 | 0.01 | 0.973032 | 0.94679212 | 21.00219 | 0.064102 | 10    |
| 600331 | 2016 | 0.037 | 0.01 | 0.973032 | 0.94679212 | 23.05329 | 0.025885 | 26.88 |
| 600331 | 2016 | 0.037 | 0.01 | 0.973032 | 0.94679212 | 22.71936 | 0.025885 | 26.88 |
| 510    | 2016 | 0.509 | 0.01 | 0.973032 | 0.94679212 | 21.00219 | 0.064102 | 10    |
| 510    | 2016 | 0.509 | 0.01 | 0.973032 | 0.94679212 | 21.00219 | 0.064102 | 10    |
| 600331 | 2016 | 0.037 | 0.01 | 0.973032 | 0.94679212 | 23.05329 | 0.025885 | 26.88 |
| 300092 | 2016 | -0.55 | 0.01 | 0.973032 | 0.94679212 | 20.36577 | 0.060982 | 17.97 |
| 510    | 2016 | 0.509 | 0.01 | 0.973032 | 0.94679212 | 21.00219 | 0.064102 | 10    |
| 300092 | 2016 | -0.55 | 0.01 | 0.973032 | 0.94679212 | 20.37324 | 0.060982 | 17.97 |
| 600331 | 2016 | 0.037 | 0.01 | 0.973032 | 0.94679212 | 23.05329 | 0.025885 | 26.88 |
| 300092 | 2016 | -0.55 | 0.01 | 0.973032 | 0.94679212 | 20.36577 | 0.060982 | 17.97 |
| 2155   | 2016 | -0.62 | 0.04 | 0.850159 | 0.72277114 | 22.59346 | 0.028179 | 39.91 |
| 2155   | 2016 | -0.62 | 0.04 | 0.850159 | 0.72277114 | 22.59346 | 0.028179 | 39.91 |
| 2155   | 2016 | -0.14 | 0.04 | 0.850159 | 0.72277114 | 22.59346 | 0.028179 | 39.91 |
| 2155   | 2016 | -0.62 | 0.04 | 0.850159 | 0.72277114 | 22.59346 | 0.028179 | 39.91 |
| 2155   | 2016 | -0.14 | 0.04 | 0.850159 | 0.72277114 | 22.59346 | 0.028179 | 39.91 |
| 2155   | 2016 | -0.62 | 0.04 | 0.850159 | 0.72277114 | 22.59346 | 0.028179 | 39.91 |
| 2155   | 2016 | -0.62 | 0.04 | 0.850159 | 0.72277114 | 22.59346 | 0.028179 | 39.91 |
| 2155   | 2016 | -0.62 | 0.04 | 0.850159 | 0.72277114 | 22.59346 | 0.028179 | 39.91 |
| 2155   | 2016 | -0.62 | 0.04 | 0.850159 | 0.72277114 | 22.59346 | 0.028179 | 39.91 |
| 2155   | 2016 | 0.036 | 0.04 | 0.850159 | 0.72277114 | 22.59346 | 0.028179 | 39.91 |
| 2155   | 2016 | -0.62 | 0.04 | 0.850159 | 0.72277114 | 22.59346 | 0.028179 | 39.91 |
| 2155   | 2016 | -0.62 | 0.04 | 0.850159 | 0.72277114 | 22.59346 | 0.028179 | 39.91 |
| 2579   | 2016 | -0.1  | 0.05 | 0.210898 | 0.04447783 | 21.17197 | 0.114186 | 30.24 |
| 100    | 2016 | -0.35 | 0.05 | 0.210898 | 0.04447783 | 25.71463 | 0.046725 | 7.84  |
| 100    | 2016 | -0.29 | 0.05 | 0.210898 | 0.04447783 | 25.71463 | 0.046725 | 7.84  |
| 300014 | 2016 | -0.02 | 0.05 | 0.210898 | 0.04447783 | 21.86034 | 0.150541 | 42.18 |
| 300014 | 2016 | -0.35 | 0.05 | 0.210898 | 0.04447783 | 22.20205 | 0.150541 | 42.18 |

|        |      |       |      |          |            |          |          |       |
|--------|------|-------|------|----------|------------|----------|----------|-------|
| 100    | 2016 | 0.146 | 0.05 | 0.210898 | 0.04447783 | 25.71463 | 0.046725 | 7.84  |
| 300014 | 2016 | 0.172 | 0.05 | 0.210898 | 0.04447783 | 22.20205 | 0.150541 | 42.18 |
| 100    | 2016 | -0.14 | 0.05 | 0.210898 | 0.04447783 | 25.71463 | 0.046725 | 7.84  |
| 100    | 2016 | -0.54 | 0.05 | 0.210898 | 0.04447783 | 25.71463 | 0.046725 | 7.84  |
| 100    | 2016 | 0.309 | 0.05 | 0.210898 | 0.04447783 | 25.71463 | 0.046725 | 7.84  |
| 100    | 2016 | -0.52 | 0.05 | 0.210898 | 0.04447783 | 25.71463 | 0.046725 | 7.84  |
| 100    | 2016 | -0.45 | 0.05 | 0.210898 | 0.04447783 | 25.71463 | 0.046725 | 7.84  |
| 100    | 2016 | 0.67  | 0.05 | 0.210898 | 0.04447783 | 25.71463 | 0.046725 | 7.84  |
| 100    | 2016 | 0.008 | 0.05 | 0.210898 | 0.04447783 | 25.71463 | 0.046725 | 7.84  |
| 100    | 2016 | -0.39 | 0.05 | 0.210898 | 0.04447783 | 25.71463 | 0.046725 | 7.84  |
| 100    | 2016 | -0.1  | 0.05 | 0.210898 | 0.04447783 | 25.71463 | 0.046725 | 7.84  |
| 100    | 2016 | -0.17 | 0.05 | 0.210898 | 0.04447783 | 25.71463 | 0.046725 | 7.84  |
| 300322 | 2016 | 0.157 | 0.05 | 0.210898 | 0.04447783 | 21.61313 | 0.03115  | 28.96 |
| 100    | 2016 | 0.289 | 0.05 | 0.210898 | 0.04447783 | 25.71463 | 0.046725 | 7.84  |
| 100    | 2016 | -0.65 | 0.05 | 0.210898 | 0.04447783 | 25.71463 | 0.046725 | 7.84  |
| 300476 | 2016 | -0.19 | 0.05 | 0.210898 | 0.04447783 | 21.58267 | 0.160304 | 27.18 |
| 300322 | 2016 | 0.251 | 0.05 | 0.210898 | 0.04447783 | 21.61313 | 0.03115  | 28.96 |
| 100    | 2016 | -0.38 | 0.05 | 0.210898 | 0.04447783 | 25.71463 | 0.046725 | 7.84  |
| 100    | 2016 | 0.67  | 0.05 | 0.210898 | 0.04447783 | 25.71463 | 0.046725 | 7.84  |
| 100    | 2016 | -0.35 | 0.05 | 0.210898 | 0.04447783 | 25.71463 | 0.046725 | 7.84  |
| 2579   | 2016 | 0.083 | 0.05 | 0.210898 | 0.04447783 | 21.17197 | 0.114186 | 30.24 |
| 300476 | 2016 | -0.19 | 0.05 | 0.210898 | 0.04447783 | 21.585   | 0.160304 | 27.18 |
| 100    | 2016 | 0.538 | 0.05 | 0.210898 | 0.04447783 | 25.71463 | 0.046725 | 7.84  |
| 100    | 2016 | 0.638 | 0.05 | 0.210898 | 0.04447783 | 25.71463 | 0.046725 | 7.84  |
| 300476 | 2016 | -0.19 | 0.05 | 0.210898 | 0.04447783 | 21.58267 | 0.160304 | 27.18 |
| 300322 | 2016 | 0.009 | 0.05 | 0.210898 | 0.04447783 | 21.61313 | 0.03115  | 28.96 |
| 100    | 2016 | 0.131 | 0.05 | 0.210898 | 0.04447783 | 25.71463 | 0.046725 | 7.84  |
| 300014 | 2016 | 0.207 | 0.05 | 0.210898 | 0.04447783 | 22.20205 | 0.150541 | 42.18 |
| 100    | 2016 | -0.35 | 0.05 | 0.210898 | 0.04447783 | 25.71463 | 0.046725 | 7.84  |
| 100    | 2016 | 0.376 | 0.05 | 0.210898 | 0.04447783 | 25.71463 | 0.046725 | 7.84  |
| 100    | 2016 | 0.152 | 0.05 | 0.210898 | 0.04447783 | 24.59078 | 0.046725 | 7.84  |
| 100    | 2016 | -0.65 | 0.05 | 0.210898 | 0.04447783 | 25.71463 | 0.058708 | 7.84  |
| 300322 | 2016 | 0.251 | 0.05 | 0.210898 | 0.04447783 | 21.61313 | 0.03115  | 28.96 |
| 2579   | 2016 | 0.083 | 0.05 | 0.210898 | 0.04447783 | 20.754   | 0.114186 | 30.24 |
| 2579   | 2016 | -0.1  | 0.05 | 0.210898 | 0.04447783 | 21.17197 | 0.114186 | 30.24 |
| 300322 | 2016 | 0.409 | 0.05 | 0.210898 | 0.04447783 | 21.00294 | 0.03115  | 28.96 |
| 100    | 2016 | -0.1  | 0.05 | 0.210898 | 0.04447783 | 25.71463 | 0.046725 | 7.84  |
| 100    | 2016 | -0.32 | 0.05 | 0.210898 | 0.04447783 | 25.71463 | 0.046725 | 7.84  |
| 300014 | 2016 | -0.06 | 0.05 | 0.210898 | 0.04447783 | 22.20205 | 0.150541 | 42.18 |
| 100    | 2016 | -0.12 | 0.05 | 0.210898 | 0.04447783 | 25.71463 | 0.046725 | 7.84  |
| 2579   | 2016 | 0.083 | 0.05 | 0.210898 | 0.04447783 | 21.17197 | 0.114186 | 30.24 |
| 100    | 2016 | 0.67  | 0.05 | 0.210898 | 0.04447783 | 25.71463 | 0.046725 | 7.84  |
| 100    | 2016 | -0.35 | 0.05 | 0.210898 | 0.04447783 | 25.71463 | 0.046725 | 7.84  |
| 100    | 2016 | 0.008 | 0.05 | 0.210898 | 0.04447783 | 25.71463 | 0.046725 | 7.84  |
| 300322 | 2016 | 0.618 | 0.05 | 0.210898 | 0.04447783 | 21.61313 | 0.03115  | 28.96 |
| 300322 | 2016 | 0.216 | 0.05 | 0.210898 | 0.04447783 | 21.61313 | 0.03115  | 28.96 |
| 2579   | 2016 | 0.064 | 0.05 | 0.210898 | 0.04447783 | 21.17197 | 0.114186 | 30.24 |
| 100    | 2016 | 0.356 | 0.05 | 0.210898 | 0.04447783 | 25.71463 | 0.046725 | 7.84  |
| 300322 | 2016 | 0.409 | 0.05 | 0.210898 | 0.04447783 | 21.61313 | 0.03115  | 28.96 |
| 100    | 2016 | 0.348 | 0.05 | 0.210898 | 0.04447783 | 25.71463 | 0.046725 | 7.84  |
| 300014 | 2016 | 0.043 | 0.05 | 0.210898 | 0.04447783 | 22.20205 | 0.150541 | 42.18 |
| 100    | 2016 | -0.1  | 0.05 | 0.210898 | 0.04447783 | 25.71463 | 0.046725 | 7.84  |
| 300014 | 2016 | -0.21 | 0.05 | 0.210898 | 0.04447783 | 21.86034 | 0.150541 | 42.18 |
| 300014 | 2016 | -0.36 | 0.05 | 0.210898 | 0.04447783 | 22.20205 | 0.150541 | 42.18 |

|        |      |       |      |          |            |          |          |       |
|--------|------|-------|------|----------|------------|----------|----------|-------|
| 100    | 2016 | 0.008 | 0.05 | 0.210898 | 0.04447783 | 25.71463 | 0.046725 | 7.84  |
| 100    | 2016 | 0.289 | 0.05 | 0.210898 | 0.04447783 | 25.71463 | 0.046725 | 7.84  |
| 100    | 2016 | -0.58 | 0.05 | 0.210898 | 0.04447783 | 25.71463 | 0.046725 | 7.84  |
| 100    | 2016 | -0.35 | 0.05 | 0.210898 | 0.04447783 | 25.71463 | 0.046725 | 7.84  |
| 300014 | 2016 | 0.043 | 0.05 | 0.210898 | 0.04447783 | 22.20205 | 0.150541 | 42.18 |
| 2579   | 2016 | 0.083 | 0.05 | 0.210898 | 0.04447783 | 21.17197 | 0.114186 | 30.24 |
| 300014 | 2016 | -0    | 0.05 | 0.210898 | 0.04447783 | 22.20205 | 0.150541 | 42.18 |
| 100    | 2016 | -0.65 | 0.05 | 0.210898 | 0.04447783 | 25.71463 | 0.046725 | 7.84  |
| 100    | 2016 | -0.32 | 0.05 | 0.210898 | 0.04447783 | 25.71463 | 0.046725 | 7.84  |
| 300014 | 2016 | 0.258 | 0.05 | 0.210898 | 0.04447783 | 22.20205 | 0.150541 | 42.18 |
| 300463 | 2016 | 0.366 | 0.01 | 1.131648 | 1.2806277  | 21.7159  | 0.14404  | 11.8  |
| 300101 | 2016 | 1.861 | 0.01 | 1.131648 | 1.2806277  | 20.86006 | 0.061839 | 38.33 |
| 2777   | 2016 | -0.24 | 0.01 | 1.131648 | 1.2806277  | 20.8369  | 0.162496 | 28.35 |
| 300467 | 2016 | 2.401 | 0.01 | 1.131648 | 1.2806277  | 20.44005 | 0.03887  | 13.7  |
| 300463 | 2016 | 0.756 | 0.01 | 1.131648 | 1.2806277  | 21.7159  | 0.14404  | 11.8  |
| 2190   | 2016 | -0.37 | 0.01 | 1.131648 | 1.2806277  | 22.90814 | 0.044216 | 51.33 |
| 2539   | 2016 | -0.96 | 0.01 | 1.131648 | 1.2806277  | 22.92298 | 0.048899 | 38.94 |
| 300467 | 2016 | 2.401 | 0.01 | 1.131648 | 1.2806277  | 20.43374 | 0.03887  | 13.7  |
| 600438 | 2016 | -0.06 | 0.01 | 1.131648 | 1.2806277  | 23.78659 | 0.086721 | 52.45 |
| 600438 | 2016 | 0.473 | 0.01 | 1.131648 | 1.2806277  | 23.78659 | 0.086721 | 52.45 |
| 2480   | 2016 | 0.191 | 0.01 | 1.131648 | 1.2806277  | 22.2921  | 0.007328 | 23.27 |
| 600391 | 2016 | 0.565 | 0.01 | 1.131648 | 1.2806277  | 22.45693 | 0.02395  | 36.02 |
| 600391 | 2016 | 0.534 | 0.01 | 1.131648 | 1.2806277  | 22.45693 | 0.02395  | 36.02 |
| 300366 | 2016 | 0.487 | 0.01 | 1.131648 | 1.2806277  | 22.05298 | 0.04258  | 30.77 |
| 300249 | 2016 | -0.11 | 0.01 | 1.131648 | 1.2806277  | 21.50276 | 0.042566 | 17.84 |
| 2312   | 2016 | 0.11  | 0.01 | 1.131648 | 1.2806277  | 22.28625 | -0.42254 | 25.54 |
| 600875 | 2016 | -0.17 | 0.01 | 1.131648 | 1.2806277  | 25.16241 | -0.07966 | 41.68 |
| 2773   | 2016 | 0.467 | 0.01 | 1.131648 | 1.2806277  | 22.04719 | 0.172165 | 33.29 |
| 2023   | 2016 | 0.366 | 0.01 | 1.131648 | 1.2806277  | 22.50252 | 0.008209 | 17.18 |
| 586    | 2016 | -0.55 | 0.01 | 1.131648 | 1.2806277  | 20.10336 | 0.014547 | 20.68 |
| 2651   | 2016 | -0.04 | 0.01 | 1.131648 | 1.2806277  | 21.50933 | 0.050408 | 36.21 |
| 2190   | 2016 | -0.49 | 0.01 | 1.131648 | 1.2806277  | 22.90814 | 0.044216 | 51.33 |
| 600875 | 2016 | -0.26 | 0.01 | 1.131648 | 1.2806277  | 25.16241 | -0.07966 | 41.68 |
| 600391 | 2016 | 0.565 | 0.01 | 1.131648 | 1.2806277  | 22.45693 | 0.02395  | 36.02 |
| 300425 | 2016 | -0.25 | 0.01 | 1.131648 | 1.2806277  | 21.46171 | 0.047268 | 43.22 |
| 300471 | 2016 | -0.17 | 0.01 | 1.131648 | 1.2806277  | 21.6031  | 0.098203 | 32.28 |
| 2422   | 2016 | -0.2  | 0.01 | 1.131648 | 1.2806277  | 23.87642 | 0.054448 | 26.33 |
| 586    | 2016 | -0.24 | 0.01 | 1.131648 | 1.2806277  | 20.12824 | 0.014547 | 20.68 |
| 600466 | 2016 | -0.97 | 0.01 | 1.131648 | 1.2806277  | 25.01871 | 0.063518 | 53.53 |
| 2268   | 2016 | 1.261 | 0.01 | 1.131648 | 1.2806277  | 22.01786 | 0.109959 | 44.2  |
| 300019 | 2016 | 0.146 | 0.01 | 1.131648 | 1.2806277  | 20.64313 | 0.124469 | 15.12 |
| 600438 | 2016 | -0.53 | 0.01 | 1.131648 | 1.2806277  | 23.78659 | 0.086721 | 52.45 |
| 300101 | 2016 | 1.125 | 0.01 | 1.131648 | 1.2806277  | 20.86006 | 0.061839 | 38.33 |
| 600875 | 2016 | 0.656 | 0.01 | 1.131648 | 1.2806277  | 25.16241 | -0.07966 | 41.68 |
| 300101 | 2016 | 1.125 | 0.01 | 1.131648 | 1.2806277  | 20.51134 | 0.061839 | 38.33 |
| 600804 | 2016 | -0.61 | 0.01 | 1.131648 | 1.2806277  | 23.74408 | 0.118817 | 8.14  |
| 300414 | 2016 | 0.043 | 0.01 | 1.131648 | 1.2806277  | 20.53581 | 0.080785 | 41.3  |
| 600674 | 2016 | 0.499 | 0.01 | 1.131648 | 1.2806277  | 24.01246 | 0.169809 | 50.66 |
| 2190   | 2016 | -0.49 | 0.01 | 1.131648 | 1.2806277  | 22.90814 | 0.044216 | 51.33 |
| 2253   | 2016 | 0.918 | 0.01 | 1.131648 | 1.2806277  | 21.13969 | 0.032649 | 8.01  |
| 600466 | 2016 | -0.01 | 0.01 | 1.131648 | 1.2806277  | 25.01871 | 0.063518 | 53.53 |
| 2539   | 2016 | -0.58 | 0.01 | 1.131648 | 1.2806277  | 22.92298 | 0.048899 | 38.94 |
| 600438 | 2016 | -0.85 | 0.01 | 1.131648 | 1.2806277  | 23.78659 | 0.086721 | 52.45 |
| 300470 | 2016 | 0.324 | 0.01 | 1.131648 | 1.2806277  | 20.85686 | 0.109376 | 27.5  |

|        |      |       |      |          |           |          |          |       |
|--------|------|-------|------|----------|-----------|----------|----------|-------|
| 300362 | 2016 | -0.54 | 0.01 | 1.131648 | 1.2806277 | 22.16744 | 0.074593 | 30.54 |
| 300101 | 2016 | 0.977 | 0.01 | 1.131648 | 1.2806277 | 20.86006 | 0.061839 | 38.33 |
| 600392 | 2016 | -0.23 | 0.01 | 1.131648 | 1.2806277 | 21.64639 | -0.02247 | 20.14 |
| 2023   | 2016 | 0.781 | 0.01 | 1.131648 | 1.2806277 | 22.50252 | 0.008209 | 17.18 |
| 2268   | 2016 | 1.039 | 0.01 | 1.131648 | 1.2806277 | 22.01786 | 0.109959 | 44.2  |
| 600438 | 2016 | -0.29 | 0.01 | 1.131648 | 1.2806277 | 23.78659 | 0.086721 | 52.45 |
| 600438 | 2016 | -0.28 | 0.01 | 1.131648 | 1.2806277 | 23.78659 | 0.086721 | 52.45 |
| 600880 | 2016 | 1.036 | 0.01 | 1.131648 | 1.2806277 | 22.19166 | 0.014244 | 23.37 |
| 2253   | 2016 | 2.243 | 0.01 | 1.131648 | 1.2806277 | 21.13969 | 0.032649 | 8.01  |
| 600353 | 2016 | -0.11 | 0.01 | 1.131648 | 1.2806277 | 21.18651 | 0.048279 | 27.91 |
| 2773   | 2016 | 0.49  | 0.01 | 1.131648 | 1.2806277 | 22.04719 | 0.172165 | 33.29 |
| 600438 | 2016 | -0.85 | 0.01 | 1.131648 | 1.2806277 | 23.78659 | 0.086721 | 52.45 |
| 300470 | 2016 | 0.324 | 0.01 | 1.131648 | 1.2806277 | 20.71923 | 0.109376 | 27.5  |
| 600674 | 2016 | 0.499 | 0.01 | 1.131648 | 1.2806277 | 24.01246 | 0.169809 | 50.66 |
| 600804 | 2016 | -0.61 | 0.01 | 1.131648 | 1.2806277 | 22.82023 | 0.118817 | 8.14  |
| 300425 | 2016 | -0.62 | 0.01 | 1.131648 | 1.2806277 | 21.46171 | 0.047268 | 43.22 |
| 600438 | 2016 | 0.353 | 0.01 | 1.131648 | 1.2806277 | 23.78659 | 0.086721 | 52.45 |
| 300425 | 2016 | -0.17 | 0.01 | 1.131648 | 1.2806277 | 21.46171 | 0.047268 | 43.22 |
| 300019 | 2016 | 0.612 | 0.01 | 1.131648 | 1.2806277 | 20.64313 | 0.124469 | 15.12 |
| 2190   | 2016 | 9E-04 | 0.01 | 1.131648 | 1.2806277 | 22.90814 | 0.044216 | 51.33 |
| 2023   | 2016 | 0.476 | 0.01 | 1.131648 | 1.2806277 | 22.50252 | 0.008209 | 17.18 |
| 2023   | 2016 | 0.366 | 0.01 | 1.131648 | 1.2806277 | 22.50252 | 0.008209 | 17.18 |
| 600875 | 2016 | 0.215 | 0.01 | 1.131648 | 1.2806277 | 24.60951 | -0.07966 | 41.68 |
| 300440 | 2016 | 1.228 | 0.01 | 1.131648 | 1.2806277 | 21.28722 | 0.104149 | 51.37 |
| 2539   | 2016 | 0.369 | 0.01 | 1.131648 | 1.2806277 | 22.92298 | 0.048899 | 38.94 |
| 600875 | 2016 | -0.28 | 0.01 | 1.131648 | 1.2806277 | 25.16241 | -0.07966 | 41.68 |
| 790    | 2016 | -0.4  | 0.01 | 1.131648 | 1.2806277 | 20.81039 | 0.123898 | 18.08 |
| 300440 | 2016 | 1.669 | 0.01 | 1.131648 | 1.2806277 | 21.28722 | 0.104149 | 51.37 |
| 300471 | 2016 | -0.13 | 0.01 | 1.131648 | 1.2806277 | 21.6031  | 0.098203 | 32.28 |
| 2023   | 2016 | 0.8   | 0.01 | 1.131648 | 1.2806277 | 22.50252 | 0.008209 | 17.18 |
| 912    | 2016 | 0.387 | 0.01 | 1.131648 | 1.2806277 | 22.75988 | -0.4336  | 54.38 |
| 2190   | 2016 | -0.49 | 0.01 | 1.131648 | 1.2806277 | 22.90814 | 0.044216 | 51.33 |
| 2023   | 2016 | 0.981 | 0.01 | 1.131648 | 1.2806277 | 22.50252 | 0.008209 | 17.18 |
| 300362 | 2016 | -0.54 | 0.01 | 1.131648 | 1.2806277 | 22.16744 | 0.074593 | 30.54 |
| 600438 | 2016 | -0.19 | 0.01 | 1.131648 | 1.2806277 | 23.78659 | 0.086721 | 52.45 |
| 790    | 2016 | -0.4  | 0.01 | 1.131648 | 1.2806277 | 20.81039 | 0.123898 | 18.08 |
| 2268   | 2016 | 1.401 | 0.01 | 1.131648 | 1.2806277 | 22.01786 | 0.109959 | 44.2  |
| 2422   | 2016 | -0.1  | 0.01 | 1.131648 | 1.2806277 | 23.87642 | 0.054448 | 26.33 |
| 300249 | 2016 | 0.402 | 0.01 | 1.131648 | 1.2806277 | 21.50276 | 0.042566 | 17.84 |
| 2312   | 2016 | -0.09 | 0.01 | 1.131648 | 1.2806277 | 22.4613  | -0.42254 | 25.54 |
| 600875 | 2016 | -0.17 | 0.01 | 1.131648 | 1.2806277 | 25.16241 | -0.07966 | 41.68 |
| 600353 | 2016 | -0    | 0.01 | 1.131648 | 1.2806277 | 21.18651 | 0.048279 | 27.91 |
| 2190   | 2016 | 0.066 | 0.01 | 1.131648 | 1.2806277 | 22.90814 | 0.044216 | 51.33 |
| 600466 | 2016 | -0.97 | 0.01 | 1.131648 | 1.2806277 | 25.01871 | 0.063518 | 53.53 |
| 600378 | 2016 | 1.129 | 0.01 | 1.131648 | 1.2806277 | 20.71213 | 0.034653 | 23.82 |
| 586    | 2016 | -0.55 | 0.01 | 1.131648 | 1.2806277 | 20.12824 | 0.014547 | 20.68 |
| 600438 | 2016 | 0.473 | 0.01 | 1.131648 | 1.2806277 | 23.78659 | 0.086721 | 52.45 |
| 600378 | 2016 | 1.129 | 0.01 | 1.131648 | 1.2806277 | 20.71213 | 0.034653 | 23.82 |
| 2422   | 2016 | 0.188 | 0.01 | 1.131648 | 1.2806277 | 23.87642 | 0.054448 | 26.33 |
| 2422   | 2016 | -0.47 | 0.01 | 1.131648 | 1.2806277 | 23.87642 | 0.054448 | 26.33 |
| 300019 | 2016 | -0.28 | 0.01 | 1.131648 | 1.2806277 | 20.64313 | 0.124469 | 15.12 |
| 2773   | 2016 | 0.313 | 0.01 | 1.131648 | 1.2806277 | 21.7717  | 0.172165 | 33.29 |
| 300366 | 2016 | 0.56  | 0.01 | 1.131648 | 1.2806277 | 22.05298 | 0.04258  | 30.77 |
| 2253   | 2016 | 1.445 | 0.01 | 1.131648 | 1.2806277 | 21.13969 | 0.032649 | 8.01  |



|        |      |       |      |          |           |          |          |       |
|--------|------|-------|------|----------|-----------|----------|----------|-------|
| 2480   | 2016 | -0.26 | 0.01 | 1.131648 | 1.2806277 | 22.2921  | 0.007328 | 23.27 |
| 600674 | 2016 | 0.276 | 0.01 | 1.131648 | 1.2806277 | 23.88221 | 0.169809 | 50.66 |
| 600674 | 2016 | -0.48 | 0.01 | 1.131648 | 1.2806277 | 24.01246 | 0.169809 | 50.66 |
| 2422   | 2016 | -0.37 | 0.01 | 1.131648 | 1.2806277 | 23.87642 | 0.054448 | 26.33 |
| 600392 | 2016 | 0.147 | 0.01 | 1.131648 | 1.2806277 | 21.64639 | -0.02247 | 20.14 |
| 300425 | 2016 | -0.49 | 0.01 | 1.131648 | 1.2806277 | 21.46171 | 0.047268 | 43.22 |
| 300470 | 2016 | 0.324 | 0.01 | 1.131648 | 1.2806277 | 20.85686 | 0.109376 | 27.5  |
| 600880 | 2016 | 1.036 | 0.01 | 1.131648 | 1.2806277 | 22.19166 | 0.014244 | 23.37 |
| 2268   | 2016 | 1.023 | 0.01 | 1.131648 | 1.2806277 | 21.54853 | 0.109959 | 44.2  |
| 2539   | 2016 | 0.104 | 0.01 | 1.131648 | 1.2806277 | 22.92298 | 0.048899 | 38.94 |
| 600438 | 2016 | 0.473 | 0.01 | 1.131648 | 1.2806277 | 23.78659 | 0.086721 | 52.45 |
| 600875 | 2016 | 0.215 | 0.01 | 1.131648 | 1.2806277 | 25.16241 | -0.07966 | 41.68 |
| 600875 | 2016 | 0.215 | 0.01 | 1.131648 | 1.2806277 | 25.16241 | -0.07966 | 41.68 |
| 600875 | 2016 | -0.24 | 0.01 | 1.131648 | 1.2806277 | 25.16241 | -0.07966 | 41.68 |
| 600875 | 2016 | 0.215 | 0.01 | 1.131648 | 1.2806277 | 25.16241 | -0.07966 | 41.68 |
| 912    | 2016 | 0.387 | 0.01 | 1.131648 | 1.2806277 | 22.75988 | -0.4336  | 54.38 |
| 2268   | 2016 | 1.401 | 0.01 | 1.131648 | 1.2806277 | 22.01786 | 0.109959 | 44.2  |
| 600438 | 2016 | -0.85 | 0.01 | 1.131648 | 1.2806277 | 23.78659 | 0.086721 | 52.45 |
| 2312   | 2016 | -0.09 | 0.01 | 1.131648 | 1.2806277 | 22.28625 | -0.42254 | 25.54 |
| 2422   | 2016 | -0.05 | 0.01 | 1.131648 | 1.2806277 | 23.75987 | 0.054448 | 26.33 |
| 2480   | 2016 | 0.191 | 0.01 | 1.131648 | 1.2806277 | 22.2921  | 0.007328 | 23.27 |
| 300434 | 2016 | -0.31 | 0.01 | 1.131648 | 1.2806277 | 20.10336 | 0.062421 | 27.29 |
| 912    | 2016 | 0.387 | 0.01 | 1.131648 | 1.2806277 | 22.75988 | -0.4336  | 54.38 |
| 300366 | 2016 | 0.56  | 0.01 | 1.131648 | 1.2806277 | 22.05298 | 0.04258  | 30.77 |
| 2312   | 2016 | -0.06 | 0.01 | 1.131648 | 1.2806277 | 22.28625 | -0.42254 | 25.54 |
| 2539   | 2016 | -0.3  | 0.01 | 1.131648 | 1.2806277 | 22.92298 | 0.048899 | 38.94 |
| 600875 | 2016 | -0.01 | 0.01 | 1.131648 | 1.2806277 | 25.16241 | -0.07966 | 41.68 |
| 300366 | 2016 | 0.466 | 0.01 | 1.131648 | 1.2806277 | 21.81052 | 0.04258  | 30.77 |
| 2539   | 2016 | -0.24 | 0.01 | 1.131648 | 1.2806277 | 22.92298 | 0.048899 | 38.94 |
| 2268   | 2016 | 1.261 | 0.01 | 1.131648 | 1.2806277 | 22.01786 | 0.109959 | 44.2  |
| 2312   | 2016 | 0.036 | 0.01 | 1.131648 | 1.2806277 | 22.28625 | -0.42254 | 25.54 |
| 600438 | 2016 | -0.28 | 0.01 | 1.131648 | 1.2806277 | 23.78659 | 0.086721 | 52.45 |
| 2190   | 2016 | -0.49 | 0.01 | 1.131648 | 1.2806277 | 22.90814 | 0.044216 | 51.33 |
| 2539   | 2016 | -0.96 | 0.01 | 1.131648 | 1.2806277 | 22.92298 | 0.048899 | 38.94 |
| 2777   | 2016 | -0.24 | 0.01 | 1.131648 | 1.2806277 | 20.8369  | 0.162496 | 28.35 |
| 300471 | 2016 | -0.12 | 0.01 | 1.131648 | 1.2806277 | 21.6031  | 0.098203 | 32.28 |
| 300463 | 2016 | 0.35  | 0.01 | 1.131648 | 1.2806277 | 21.7159  | 0.14404  | 11.8  |
| 2023   | 2016 | 0.981 | 0.01 | 1.131648 | 1.2806277 | 22.26999 | 0.008209 | 17.18 |
| 300028 | 2016 | 0.544 | 0.01 | 1.131648 | 1.2806277 | 20.10336 | -0.05853 | 27.98 |
| 2777   | 2016 | -0.24 | 0.01 | 1.131648 | 1.2806277 | 20.8369  | 0.162496 | 28.35 |
| 2312   | 2016 | -0.63 | 0.01 | 1.131648 | 1.2806277 | 22.28625 | -0.42254 | 25.54 |
| 600875 | 2016 | -0.01 | 0.01 | 1.131648 | 1.2806277 | 25.16241 | -0.07966 | 41.68 |
| 2422   | 2016 | 0.003 | 0.01 | 1.131648 | 1.2806277 | 23.87642 | 0.054448 | 26.33 |
| 2422   | 2016 | -0.47 | 0.01 | 1.131648 | 1.2806277 | 23.87642 | 0.054448 | 26.33 |
| 300414 | 2016 | 0.043 | 0.01 | 1.131648 | 1.2806277 | 20.53581 | 0.080785 | 41.3  |
| 300471 | 2016 | -0.07 | 0.01 | 1.131648 | 1.2806277 | 21.6031  | 0.098203 | 32.28 |
| 300471 | 2016 | -0.17 | 0.01 | 1.131648 | 1.2806277 | 21.6031  | 0.098203 | 32.28 |
| 300471 | 2016 | -0.17 | 0.01 | 1.131648 | 1.2806277 | 21.6031  | 0.098203 | 32.28 |
| 300471 | 2016 | -0.07 | 0.01 | 1.131648 | 1.2806277 | 21.6031  | 0.098203 | 32.28 |
| 300471 | 2016 | -0.12 | 0.01 | 1.131648 | 1.2806277 | 21.6031  | 0.098203 | 32.28 |
| 2312   | 2016 | -0.06 | 0.01 | 1.131648 | 1.2806277 | 22.28625 | -0.42254 | 25.54 |
| 600466 | 2016 | 0.359 | 0.01 | 1.131648 | 1.2806277 | 25.01871 | 0.063518 | 53.53 |
| 300471 | 2016 | -0.03 | 0.01 | 1.131648 | 1.2806277 | 21.47996 | 0.098203 | 32.28 |
| 600804 | 2016 | -0.61 | 0.01 | 1.131648 | 1.2806277 | 23.74408 | 0.118817 | 8.14  |

|        |      |       |      |          |           |          |          |       |
|--------|------|-------|------|----------|-----------|----------|----------|-------|
| 586    | 2016 | -0.55 | 0.01 | 1.131648 | 1.2806277 | 20.12824 | 0.014547 | 20.68 |
| 2651   | 2016 | -0.05 | 0.01 | 1.131648 | 1.2806277 | 21.63392 | 0.050408 | 36.21 |
| 300440 | 2016 | 1.139 | 0.01 | 1.131648 | 1.2806277 | 21.29185 | 0.104149 | 51.37 |
| 600875 | 2016 | -0.01 | 0.01 | 1.131648 | 1.2806277 | 25.16241 | -0.07966 | 41.68 |
| 790    | 2016 | -0.4  | 0.01 | 1.131648 | 1.2806277 | 20.81039 | 0.123898 | 18.08 |
| 2422   | 2016 | -0.47 | 0.01 | 1.131648 | 1.2806277 | 23.87642 | 0.054448 | 26.33 |
| 300434 | 2016 | -0.31 | 0.01 | 1.131648 | 1.2806277 | 20.10336 | 0.062421 | 27.29 |
| 2480   | 2016 | -0.14 | 0.01 | 1.131648 | 1.2806277 | 22.2921  | 0.007328 | 23.27 |
| 300425 | 2016 | -0.25 | 0.01 | 1.131648 | 1.2806277 | 21.46171 | 0.047268 | 43.22 |
| 2422   | 2016 | 0.519 | 0.01 | 1.131648 | 1.2806277 | 23.87642 | 0.054448 | 26.33 |
| 300425 | 2016 | -0.62 | 0.01 | 1.131648 | 1.2806277 | 21.46171 | 0.047268 | 43.22 |
| 2651   | 2016 | 0.107 | 0.01 | 1.131648 | 1.2806277 | 21.63392 | 0.050408 | 36.21 |
| 600438 | 2016 | 0.473 | 0.01 | 1.131648 | 1.2806277 | 23.78659 | 0.086721 | 52.45 |
| 2253   | 2016 | 1.278 | 0.01 | 1.131648 | 1.2806277 | 21.13969 | 0.032649 | 8.01  |
| 2023   | 2016 | 0.366 | 0.01 | 1.131648 | 1.2806277 | 22.50252 | 0.008209 | 17.18 |
| 300463 | 2016 | 0.436 | 0.01 | 1.131648 | 1.2806277 | 21.7159  | 0.14404  | 11.8  |
| 790    | 2016 | -0.4  | 0.01 | 1.131648 | 1.2806277 | 20.81039 | 0.123898 | 18.08 |
| 600438 | 2016 | 0.473 | 0.01 | 1.131648 | 1.2806277 | 23.78659 | 0.086721 | 52.45 |
| 600466 | 2016 | -0.14 | 0.01 | 1.131648 | 1.2806277 | 25.01871 | 0.063518 | 53.53 |
| 600392 | 2016 | -0.23 | 0.01 | 1.131648 | 1.2806277 | 21.64639 | -0.02247 | 20.14 |
| 300471 | 2016 | -0.17 | 0.01 | 1.131648 | 1.2806277 | 21.6031  | 0.098203 | 32.28 |
| 2268   | 2016 | 1.116 | 0.01 | 1.131648 | 1.2806277 | 22.01786 | 0.109959 | 44.2  |
| 2253   | 2016 | 1.48  | 0.01 | 1.131648 | 1.2806277 | 21.13969 | 0.032649 | 8.01  |
| 300019 | 2016 | 0.612 | 0.01 | 1.131648 | 1.2806277 | 20.64313 | 0.124469 | 15.12 |
| 300249 | 2016 | -0.11 | 0.01 | 1.131648 | 1.2806277 | 21.50276 | 0.042566 | 17.84 |
| 300425 | 2016 | -0.24 | 0.01 | 1.131648 | 1.2806277 | 21.08735 | 0.047268 | 43.22 |
| 2539   | 2016 | -0.38 | 0.01 | 1.131648 | 1.2806277 | 22.92298 | 0.048899 | 38.94 |
| 2190   | 2016 | 9E-04 | 0.01 | 1.131648 | 1.2806277 | 22.90814 | 0.044216 | 51.33 |
| 300434 | 2016 | -0.31 | 0.01 | 1.131648 | 1.2806277 | 20.10336 | 0.062421 | 27.29 |
| 300440 | 2016 | 1.669 | 0.01 | 1.131648 | 1.2806277 | 21.28722 | 0.104149 | 51.37 |
| 790    | 2016 | -0.4  | 0.01 | 1.131648 | 1.2806277 | 20.67654 | 0.123898 | 18.08 |
| 600438 | 2016 | 0.473 | 0.01 | 1.131648 | 1.2806277 | 23.78659 | 0.086721 | 52.45 |
| 2190   | 2016 | -0.49 | 0.01 | 1.131648 | 1.2806277 | 21.40883 | 0.044216 | 51.33 |
| 600880 | 2016 | 1.036 | 0.01 | 1.131648 | 1.2806277 | 22.03584 | 0.014244 | 23.37 |
| 586    | 2016 | -0.68 | 0.01 | 1.131648 | 1.2806277 | 20.12824 | 0.014547 | 20.68 |
| 2422   | 2016 | -0.23 | 0.01 | 1.131648 | 1.2806277 | 23.87642 | 0.054448 | 26.33 |
| 2422   | 2016 | -0.14 | 0.01 | 1.131648 | 1.2806277 | 23.87642 | 0.054448 | 26.33 |
| 600391 | 2016 | 0.671 | 0.01 | 1.131648 | 1.2806277 | 22.25305 | 0.02395  | 36.02 |
| 2190   | 2016 | -0.49 | 0.01 | 1.131648 | 1.2806277 | 22.90814 | 0.044216 | 51.33 |
| 2422   | 2016 | -0.47 | 0.01 | 1.131648 | 1.2806277 | 23.87642 | 0.054448 | 26.33 |
| 600880 | 2016 | 1.036 | 0.01 | 1.131648 | 1.2806277 | 22.19166 | 0.014244 | 23.37 |
| 2422   | 2016 | -0.47 | 0.01 | 1.131648 | 1.2806277 | 23.87642 | 0.054448 | 26.33 |
| 300425 | 2016 | -0.18 | 0.01 | 1.131648 | 1.2806277 | 21.46171 | 0.047268 | 43.22 |
| 300019 | 2016 | -0.28 | 0.01 | 1.131648 | 1.2806277 | 20.64313 | 0.124469 | 15.12 |
| 600875 | 2016 | 0.215 | 0.01 | 1.131648 | 1.2806277 | 25.16241 | -0.07966 | 41.68 |
| 2268   | 2016 | 0.739 | 0.01 | 1.131648 | 1.2806277 | 22.01786 | 0.109959 | 44.2  |
| 2023   | 2016 | 0.981 | 0.01 | 1.131648 | 1.2806277 | 22.50252 | 0.008209 | 17.18 |
| 600392 | 2016 | -0.03 | 0.01 | 1.131648 | 1.2806277 | 21.64639 | -0.02247 | 20.14 |
| 300463 | 2016 | 0.202 | 0.01 | 1.131648 | 1.2806277 | 21.34238 | 0.14404  | 11.8  |
| 600438 | 2016 | -0.19 | 0.01 | 1.131648 | 1.2806277 | 23.78659 | 0.086721 | 52.45 |
| 2190   | 2016 | -0.49 | 0.01 | 1.131648 | 1.2806277 | 22.90814 | 0.044216 | 51.33 |
| 2773   | 2016 | 0.313 | 0.01 | 1.131648 | 1.2806277 | 22.04719 | 0.172165 | 33.29 |
| 586    | 2016 | -0.55 | 0.01 | 1.131648 | 1.2806277 | 20.12824 | 0.014547 | 20.68 |
| 912    | 2016 | 0.387 | 0.01 | 1.131648 | 1.2806277 | 22.75988 | -0.4336  | 54.38 |

|        |      |       |      |          |           |          |          |       |
|--------|------|-------|------|----------|-----------|----------|----------|-------|
| 300425 | 2016 | 0.042 | 0.01 | 1.131648 | 1.2806277 | 21.46171 | 0.047268 | 43.22 |
| 2268   | 2016 | 1.261 | 0.01 | 1.131648 | 1.2806277 | 22.01786 | 0.109959 | 44.2  |
| 2268   | 2016 | 1.261 | 0.01 | 1.131648 | 1.2806277 | 22.01786 | 0.109959 | 44.2  |
| 2253   | 2016 | 1.397 | 0.01 | 1.131648 | 1.2806277 | 21.13969 | 0.032649 | 8.01  |
| 2773   | 2016 | 0.49  | 0.01 | 1.131648 | 1.2806277 | 22.04719 | 0.172165 | 33.29 |
| 600392 | 2016 | 0.147 | 0.01 | 1.131648 | 1.2806277 | 21.64639 | -0.02247 | 20.14 |
| 300101 | 2016 | 1.463 | 0.01 | 1.131648 | 1.2806277 | 20.86006 | 0.061839 | 38.33 |
| 300028 | 2016 | 0.942 | 0.01 | 1.131648 | 1.2806277 | 20.10336 | -0.05853 | 27.98 |
| 2422   | 2016 | 0.85  | 0.01 | 1.131648 | 1.2806277 | 23.87642 | 0.054448 | 26.33 |
| 600392 | 2016 | -0.09 | 0.01 | 1.131648 | 1.2806277 | 21.64639 | -0.02247 | 20.14 |
| 600875 | 2016 | 0.089 | 0.01 | 1.131648 | 1.2806277 | 25.16241 | -0.07966 | 41.68 |
| 600875 | 2016 | 0.215 | 0.01 | 1.131648 | 1.2806277 | 25.16241 | -0.07966 | 41.68 |
| 300101 | 2016 | 1.356 | 0.01 | 1.131648 | 1.2806277 | 20.86006 | 0.061839 | 38.33 |
| 586    | 2016 | -0.55 | 0.01 | 1.131648 | 1.2806277 | 20.12824 | 0.014547 | 20.68 |
| 600875 | 2016 | -0.26 | 0.01 | 1.131648 | 1.2806277 | 25.16241 | -0.07966 | 41.68 |
| 600391 | 2016 | 0.557 | 0.01 | 1.131648 | 1.2806277 | 22.45693 | 0.02395  | 36.02 |
| 600438 | 2016 | -0.28 | 0.01 | 1.131648 | 1.2806277 | 23.78659 | 0.086721 | 52.45 |
| 2651   | 2016 | -0.01 | 0.01 | 1.131648 | 1.2806277 | 21.63392 | 0.050408 | 36.21 |
| 2480   | 2016 | 0.412 | 0.01 | 1.131648 | 1.2806277 | 22.2921  | 0.007328 | 23.27 |
| 2480   | 2016 | -0.12 | 0.01 | 1.131648 | 1.2806277 | 22.2921  | 0.007328 | 23.27 |
| 2480   | 2016 | -0.16 | 0.01 | 1.131648 | 1.2806277 | 22.2921  | 0.007328 | 23.27 |
| 2480   | 2016 | -0.16 | 0.01 | 1.131648 | 1.2806277 | 22.2921  | 0.007328 | 23.27 |
| 2480   | 2016 | 0.191 | 0.01 | 1.131648 | 1.2806277 | 22.14661 | 0.007328 | 23.27 |
| 790    | 2016 | -0.4  | 0.01 | 1.131648 | 1.2806277 | 20.81039 | 0.123898 | 18.08 |
| 2651   | 2016 | -0.07 | 0.01 | 1.131648 | 1.2806277 | 21.63392 | 0.050408 | 36.21 |
| 300440 | 2016 | 1.139 | 0.01 | 1.131648 | 1.2806277 | 21.28722 | 0.104149 | 51.37 |
| 600438 | 2016 | -0.28 | 0.01 | 1.131648 | 1.2806277 | 23.50052 | 0.086721 | 52.45 |
| 2422   | 2016 | -0.47 | 0.01 | 1.131648 | 1.2806277 | 23.87642 | 0.054448 | 26.33 |
| 586    | 2016 | -0.55 | 0.01 | 1.131648 | 1.2806277 | 20.12824 | 0.014547 | 20.68 |
| 2539   | 2016 | 0.369 | 0.01 | 1.131648 | 1.2806277 | 22.92298 | 0.048899 | 38.94 |
| 300249 | 2016 | 0.402 | 0.01 | 1.131648 | 1.2806277 | 20.78393 | 0.042566 | 17.84 |
| 300366 | 2016 | -0.1  | 0.01 | 1.131648 | 1.2806277 | 22.05298 | 0.04258  | 30.77 |
| 300362 | 2016 | -0.54 | 0.01 | 1.131648 | 1.2806277 | 21.99928 | 0.074593 | 30.54 |
| 300463 | 2016 | 0.123 | 0.01 | 1.131648 | 1.2806277 | 21.7159  | 0.14404  | 11.8  |
| 300463 | 2016 | 0.317 | 0.01 | 1.131648 | 1.2806277 | 21.7159  | 0.14404  | 11.8  |
| 2268   | 2016 | 1.261 | 0.01 | 1.131648 | 1.2806277 | 22.01786 | 0.109959 | 44.2  |
| 600875 | 2016 | -0.67 | 0.01 | 1.131648 | 1.2806277 | 25.16241 | -0.07966 | 41.68 |
| 300028 | 2016 | 0.544 | 0.01 | 1.131648 | 1.2806277 | 20.10336 | -0.05853 | 27.98 |
| 600392 | 2016 | -0.45 | 0.01 | 1.131648 | 1.2806277 | 21.64639 | -0.02247 | 20.14 |
| 2422   | 2016 | 0.85  | 0.01 | 1.131648 | 1.2806277 | 23.87642 | 0.054448 | 26.33 |
| 300249 | 2016 | -0.11 | 0.01 | 1.131648 | 1.2806277 | 21.50276 | 0.042566 | 17.84 |
| 600438 | 2016 | -0.28 | 0.01 | 1.131648 | 1.2806277 | 23.78659 | 0.086721 | 52.45 |
| 2539   | 2016 | -0.29 | 0.01 | 1.131648 | 1.2806277 | 22.92298 | 0.048899 | 38.94 |
| 300019 | 2016 | 0.612 | 0.01 | 1.131648 | 1.2806277 | 20.40023 | 0.124469 | 15.12 |
| 2422   | 2016 | 0.489 | 0.01 | 1.131648 | 1.2806277 | 23.87642 | 0.054448 | 26.33 |
| 300028 | 2016 | 0.544 | 0.01 | 1.131648 | 1.2806277 | 20.10336 | -0.05853 | 27.98 |
| 2539   | 2016 | 0.369 | 0.01 | 1.131648 | 1.2806277 | 22.92298 | 0.048899 | 38.94 |
| 2539   | 2016 | 0.369 | 0.01 | 1.131648 | 1.2806277 | 22.92298 | 0.048899 | 38.94 |
| 2253   | 2016 | 1.48  | 0.01 | 1.131648 | 1.2806277 | 21.09765 | 0.032649 | 8.01  |
| 2253   | 2016 | 1.249 | 0.01 | 1.131648 | 1.2806277 | 21.13969 | 0.032649 | 8.01  |
| 300249 | 2016 | -0.13 | 0.01 | 1.131648 | 1.2806277 | 21.50276 | 0.042566 | 17.84 |
| 2539   | 2016 | 0.081 | 0.01 | 1.131648 | 1.2806277 | 22.58985 | 0.048899 | 38.94 |
| 300101 | 2016 | 1.198 | 0.01 | 1.131648 | 1.2806277 | 20.86006 | 0.061839 | 38.33 |
| 2777   | 2016 | -0.24 | 0.01 | 1.131648 | 1.2806277 | 20.78348 | 0.162496 | 28.35 |

|        |      |       |      |          |            |          |          |       |
|--------|------|-------|------|----------|------------|----------|----------|-------|
| 2773   | 2016 | 0.755 | 0.01 | 1.131648 | 1.2806277  | 22.04719 | 0.172165 | 33.29 |
| 2422   | 2016 | -0.47 | 0.01 | 1.131648 | 1.2806277  | 23.87642 | 0.054448 | 26.33 |
| 2749   | 2016 | 0.558 | 0.01 | 1.131648 | 1.2806277  | 20.51214 | 0.155424 | 37.76 |
| 300028 | 2016 | 0.544 | 0.01 | 1.131648 | 1.2806277  | 20.10336 | -0.05853 | 27.98 |
| 2773   | 2016 | 0.422 | 0.01 | 1.131648 | 1.2806277  | 22.04719 | 0.172165 | 33.29 |
| 2539   | 2016 | -0.27 | 0.01 | 1.131648 | 1.2806277  | 22.92298 | 0.048899 | 38.94 |
| 600353 | 2016 | -0.17 | 0.01 | 1.131648 | 1.2806277  | 21.18651 | 0.048279 | 27.91 |
| 300362 | 2016 | -0.54 | 0.01 | 1.131648 | 1.2806277  | 22.16744 | 0.074593 | 30.54 |
| 2777   | 2016 | -0.24 | 0.01 | 1.131648 | 1.2806277  | 20.8369  | 0.162496 | 28.35 |
| 300249 | 2016 | -0.39 | 0.01 | 1.131648 | 1.2806277  | 21.50276 | 0.042566 | 17.84 |
| 600378 | 2016 | 1.129 | 0.01 | 1.131648 | 1.2806277  | 20.71213 | 0.034653 | 23.82 |
| 790    | 2016 | -0.4  | 0.01 | 1.131648 | 1.2806277  | 20.81039 | 0.123898 | 18.08 |
| 300249 | 2016 | -0.02 | 0.01 | 1.131648 | 1.2806277  | 21.50276 | 0.042566 | 17.84 |
| 300362 | 2016 | -0.54 | 0.01 | 1.131648 | 1.2806277  | 22.16744 | 0.074593 | 30.54 |
| 300471 | 2016 | -0.17 | 0.01 | 1.131648 | 1.2806277  | 21.6031  | 0.098203 | 32.28 |
| 2312   | 2016 | -0.06 | 0.01 | 1.131648 | 1.2806277  | 22.28625 | -0.42254 | 25.54 |
| 600466 | 2016 | -0.97 | 0.01 | 1.131648 | 1.2806277  | 23.70878 | 0.063518 | 53.53 |
| 600804 | 2016 | -0.61 | 0.01 | 1.131648 | 1.2806277  | 23.74408 | 0.118817 | 8.14  |
| 2023   | 2016 | 0.366 | 0.01 | 1.131648 | 1.2806277  | 22.50252 | 0.008209 | 17.18 |
| 600438 | 2016 | -0.28 | 0.01 | 1.131648 | 1.2806277  | 23.78659 | 0.086721 | 52.45 |
| 300101 | 2016 | 1.861 | 0.01 | 1.131648 | 1.2806277  | 20.86006 | 0.061839 | 38.33 |
| 600466 | 2016 | -0.01 | 0.01 | 1.131648 | 1.2806277  | 25.01871 | 0.063518 | 53.53 |
| 2539   | 2016 | 0.369 | 0.01 | 1.131648 | 1.2806277  | 22.92298 | 0.048899 | 38.94 |
| 600392 | 2016 | 0.147 | 0.01 | 1.131648 | 1.2806277  | 21.84608 | -0.02247 | 20.14 |
| 600880 | 2016 | 1.036 | 0.01 | 1.131648 | 1.2806277  | 22.19166 | 0.014244 | 23.37 |
| 2539   | 2016 | -0.96 | 0.01 | 1.131648 | 1.2806277  | 22.92298 | 0.048899 | 38.94 |
| 2422   | 2016 | 0.85  | 0.01 | 1.131648 | 1.2806277  | 23.87642 | 0.054448 | 26.33 |
| 2651   | 2016 | -0.07 | 0.01 | 1.131648 | 1.2806277  | 21.63392 | 0.050408 | 36.21 |
| 600875 | 2016 | -0.05 | 0.01 | 1.131648 | 1.2806277  | 25.16241 | -0.07966 | 41.68 |
| 600804 | 2016 | -0.61 | 0.01 | 1.131648 | 1.2806277  | 23.74408 | 0.118817 | 8.14  |
| 600674 | 2016 | -0.48 | 0.01 | 1.131648 | 1.2806277  | 24.01246 | 0.169809 | 50.66 |
| 2253   | 2016 | 2.243 | 0.01 | 1.131648 | 1.2806277  | 21.13969 | 0.032649 | 8.01  |
| 300467 | 2016 | 2.401 | 0.01 | 1.131648 | 1.2806277  | 20.43374 | 0.03887  | 13.7  |
| 300366 | 2016 | 0.56  | 0.01 | 1.131648 | 1.2806277  | 22.05298 | 0.04258  | 30.77 |
| 300101 | 2016 | 1.463 | 0.01 | 1.131648 | 1.2806277  | 20.86006 | 0.061839 | 38.33 |
| 2422   | 2016 | -0.37 | 0.01 | 1.131648 | 1.2806277  | 23.87642 | 0.054448 | 26.33 |
| 300366 | 2016 | 0.56  | 0.01 | 1.131648 | 1.2806277  | 22.05298 | 0.04258  | 30.77 |
| 300414 | 2016 | 0.043 | 0.01 | 1.131648 | 1.2806277  | 20.52095 | 0.080785 | 41.3  |
| 600353 | 2016 | -0    | 0.01 | 1.131648 | 1.2806277  | 20.91232 | 0.048279 | 27.91 |
| 912    | 2016 | 0.387 | 0.01 | 1.131648 | 1.2806277  | 21.60988 | -0.4336  | 54.38 |
| 300249 | 2016 | 0.932 | 0.01 | 1.131648 | 1.2806277  | 21.50276 | 0.042566 | 17.84 |
| 600391 | 2016 | 0.328 | 0.01 | 1.131648 | 1.2806277  | 22.45693 | 0.02395  | 36.02 |
| 300463 | 2016 | -0.08 | 0.01 | 1.131648 | 1.2806277  | 21.34238 | 0.14404  | 11.8  |
| 2773   | 2016 | 0.437 | 0.01 | 1.131648 | 1.2806277  | 22.04719 | 0.172165 | 33.29 |
| 300471 | 2016 | -0.45 | 0.01 | 1.131648 | 1.2806277  | 21.6031  | 0.098203 | 32.28 |
| 2749   | 2016 | 0.558 | 0.01 | 1.131648 | 1.2806277  | 20.71797 | 0.155424 | 37.76 |
| 2749   | 2016 | 0.558 | 0.01 | 1.131648 | 1.2806277  | 20.71797 | 0.155424 | 37.76 |
| 300028 | 2016 | 0.5   | 0.01 | 1.131648 | 1.2806277  | 20.10336 | -0.05853 | 27.98 |
| 600875 | 2016 | -0.35 | 0.01 | 1.131648 | 1.2806277  | 25.16241 | -0.07966 | 41.68 |
| 2539   | 2016 | 0.104 | 0.01 | 1.131648 | 1.2806277  | 22.92298 | 0.048899 | 38.94 |
| 600353 | 2016 | -0.17 | 0.01 | 1.131648 | 1.2806277  | 21.18651 | 0.048279 | 27.91 |
| 848    | 2016 | -0.81 | 0    | 0.937531 | 0.87896392 | 21.85348 | 0.227124 | 40.68 |
| 848    | 2016 | -0.81 | 0    | 0.937531 | 0.87896392 | 21.85348 | 0.227124 | 40.68 |
| 848    | 2016 | -0.81 | 0    | 0.937531 | 0.87896392 | 21.80183 | 0.227124 | 40.68 |

|        |      |       |      |          |            |          |          |       |
|--------|------|-------|------|----------|------------|----------|----------|-------|
| 300294 | 2016 | -0.12 | 0.02 | 1.068303 | 1.1412703  | 21.60682 | 0.130174 | 33.44 |
| 300472 | 2016 | 0.622 | 0.02 | 1.068303 | 1.1412703  | 20.23492 | 0.041769 | 11.17 |
| 300472 | 2016 | 0.564 | 0.02 | 1.068303 | 1.1412703  | 20.23492 | 0.041769 | 11.17 |
| 300472 | 2016 | 0.255 | 0.02 | 1.068303 | 1.1412703  | 20.23492 | 0.041769 | 11.17 |
| 300294 | 2016 | -0.21 | 0.02 | 1.068303 | 1.1412703  | 21.60682 | 0.130174 | 33.44 |
| 300472 | 2016 | 0.485 | 0.02 | 1.068303 | 1.1412703  | 20.23492 | 0.041769 | 11.17 |
| 300472 | 2016 | 0.616 | 0.02 | 1.068303 | 1.1412703  | 20.23492 | 0.041769 | 11.17 |
| 300472 | 2016 | 1.053 | 0.02 | 1.068303 | 1.1412703  | 20.23492 | 0.041769 | 11.17 |
| 300294 | 2016 | 0.806 | 0.02 | 1.068303 | 1.1412703  | 21.60682 | 0.130174 | 33.44 |
| 300294 | 2016 | -0.52 | 0.02 | 1.068303 | 1.1412703  | 21.60682 | 0.130174 | 33.44 |
| 300294 | 2016 | -0.33 | 0.02 | 1.068303 | 1.1412703  | 21.5134  | 0.130174 | 33.44 |
| 300294 | 2016 | -0.12 | 0.02 | 1.068303 | 1.1412703  | 21.60682 | 0.130174 | 33.44 |
| 300472 | 2016 | 0.255 | 0.02 | 1.068303 | 1.1412703  | 20.13366 | 0.041769 | 11.17 |
| 600211 | 2016 | 0.448 | 0.01 | 0.050103 | 0.00251027 | 21.55211 | 0.302158 | 21.62 |
| 600873 | 2016 | 0.351 | 0.01 | 0.050103 | 0.00251027 | 23.55548 | 0.114789 | 27.48 |
| 600211 | 2016 | 0.448 | 0.01 | 0.050103 | 0.00251027 | 20.56336 | 0.302158 | 21.62 |
| 600873 | 2016 | -0.16 | 0.01 | 0.050103 | 0.00251027 | 23.55548 | 0.114789 | 27.48 |
| 600873 | 2016 | -0.16 | 0.01 | 0.050103 | 2.51E-03   | 23.55548 | 0.114789 | 27.48 |
| 600873 | 2016 | 0.455 | 0.01 | 0.050103 | 2.51E-03   | 23.55548 | 0.114789 | 27.48 |
| 600873 | 2016 | 0.351 | 0.01 | 0.050103 | 2.51E-03   | 23.55548 | 0.114789 | 27.48 |
| 600873 | 2016 | -0.16 | 0.01 | 0.050103 | 2.51E-03   | 23.55548 | 0.114789 | 27.48 |
| 600873 | 2016 | -0.16 | 0.01 | 0.050103 | 2.51E-03   | 23.55548 | 0.114789 | 27.48 |
| 600873 | 2016 | -0.19 | 0.01 | 0.050103 | 2.51E-03   | 23.41874 | 0.114789 | 27.48 |
| 600873 | 2016 | -0.16 | 0.01 | 0.050103 | 0.00251027 | 23.55548 | 0.114789 | 27.48 |
| 600211 | 2016 | 0.448 | 0.01 | 0.050103 | 0.00251027 | 21.55211 | 0.302158 | 21.62 |
| 600211 | 2016 | 0.448 | 0.01 | 0.050103 | 0.00251027 | 21.55211 | 0.302158 | 21.62 |
| 600873 | 2016 | -0.16 | 0.01 | 0.050103 | 0.00251027 | 23.55548 | 0.114789 | 27.48 |
| 600211 | 2016 | 0.448 | 0.01 | 0.050103 | 0.00251027 | 21.55211 | 0.302158 | 21.62 |
| 600211 | 2016 | 0.448 | 0.01 | 0.050103 | 0.00251027 | 21.55211 | 0.302158 | 21.62 |
| 2031   | 2016 | 0.217 | 0.05 | 1.450536 | 2.1040546  | 22.2826  | 0.014239 | 18.24 |
| 2031   | 2016 | 0.787 | 0.05 | 1.450536 | 2.1040546  | 22.23678 | 0.014239 | 18.24 |
| 2776   | 2016 | -0.41 | 0.05 | 1.450536 | 2.1040546  | 21.5348  | 0.057167 | 29.55 |
| 600518 | 2016 | 0.445 | 0.05 | 1.450536 | 2.1040546  | 24.72739 | 0.11356  | 31.27 |
| 2495   | 2016 | -0.26 | 0.05 | 1.450536 | 2.1040546  | 20.88365 | 0.02897  | 17.15 |
| 600589 | 2016 | 0.593 | 0.05 | 1.450536 | 2.1040546  | 22.34362 | 0.033783 | 19.53 |
| 600518 | 2016 | 0.445 | 0.05 | 1.450536 | 2.1040546  | 24.72739 | 0.11356  | 31.27 |
| 600518 | 2016 | 0.445 | 0.05 | 1.450536 | 2.1040546  | 24.72739 | 0.11356  | 31.27 |
| 2776   | 2016 | -0.41 | 0.05 | 1.450536 | 2.1040546  | 21.52399 | 0.057167 | 29.55 |
| 2348   | 2016 | -0.59 | 0.05 | 1.450536 | 2.1040546  | 20.99986 | 0.034161 | 19.76 |
| 2031   | 2016 | -0.25 | 0.05 | 1.450536 | 2.1040546  | 22.2826  | 0.014239 | 18.24 |
| 2495   | 2016 | -0.26 | 0.05 | 1.450536 | 2.1040546  | 20.85998 | 0.02897  | 17.15 |
| 600589 | 2016 | 0.593 | 0.05 | 1.450536 | 2.1040546  | 22.34362 | 0.033783 | 19.53 |
| 600518 | 2016 | -0.34 | 0.05 | 1.450536 | 2.1040546  | 24.72739 | 0.11356  | 31.27 |
| 600518 | 2016 | 0.445 | 0.05 | 1.450536 | 2.1040546  | 24.72739 | 0.11356  | 31.27 |
| 2031   | 2016 | 0.787 | 0.05 | 1.450536 | 2.1040546  | 22.2826  | 0.014239 | 18.24 |
| 2031   | 2016 | -0.25 | 0.05 | 1.450536 | 2.1040546  | 22.2826  | 0.014239 | 18.24 |
| 600589 | 2016 | 0.593 | 0.05 | 1.450536 | 2.1040546  | 22.34505 | 0.033783 | 19.53 |
| 600518 | 2016 | 0.445 | 0.05 | 1.450536 | 2.1040546  | 24.72739 | 0.11356  | 31.27 |
| 2776   | 2016 | -0.41 | 0.05 | 1.450536 | 2.1040546  | 21.5348  | 0.057167 | 29.55 |
| 600518 | 2016 | 0.445 | 0.05 | 1.450536 | 2.1040546  | 24.72739 | 0.11356  | 31.27 |
| 600518 | 2016 | 0.445 | 0.05 | 1.450536 | 2.1040546  | 24.72739 | 0.11356  | 31.27 |
| 2031   | 2016 | 0.1   | 0.05 | 1.450536 | 2.1040546  | 22.2826  | 0.014239 | 18.24 |
| 2348   | 2016 | -0.59 | 0.05 | 1.450536 | 2.1040546  | 20.99986 | 0.034161 | 19.76 |
| 600518 | 2016 | 0.445 | 0.05 | 1.450536 | 2.1040546  | 24.67341 | 0.11356  | 31.27 |

|        |      |       |      |          |            |          |          |       |
|--------|------|-------|------|----------|------------|----------|----------|-------|
| 600518 | 2016 | 0.445 | 0.05 | 1.450536 | 2.1040546  | 24.72739 | 0.11356  | 31.27 |
| 2031   | 2016 | 0.217 | 0.05 | 1.450536 | 2.1040546  | 22.2826  | 0.014239 | 18.24 |
| 600518 | 2016 | 0.445 | 0.05 | 1.450536 | 2.1040546  | 24.72739 | 0.11356  | 31.27 |
| 600518 | 2016 | 0.445 | 0.05 | 1.450536 | 2.1040546  | 24.72739 | 0.11356  | 31.27 |
| 600518 | 2016 | -0.56 | 0.05 | 1.450536 | 2.1040546  | 24.72739 | 0.11356  | 31.27 |
| 2495   | 2016 | -0.26 | 0.05 | 1.450536 | 2.1040546  | 20.88365 | 0.02897  | 17.15 |
| 600518 | 2016 | -0.56 | 0.05 | 1.450536 | 2.1040546  | 24.72739 | 0.11356  | 31.27 |
| 2348   | 2016 | -0.59 | 0.05 | 1.450536 | 2.1040546  | 20.99722 | 0.034161 | 19.76 |
| 629    | 2016 | 0.661 | 0.01 | 0.235741 | 0.05557367 | 22.92632 | -0.4336  | 35.49 |
| 629    | 2016 | 0.661 | 0.01 | 0.235741 | 0.05557367 | 22.98723 | -0.4336  | 35.49 |
| 629    | 2016 | 0.661 | 0.01 | 0.235741 | 0.05557367 | 22.98723 | -0.4336  | 35.49 |
| 629    | 2016 | 0.252 | 0.01 | 0.235741 | 0.05557367 | 22.98723 | -0.4336  | 35.49 |
| 629    | 2016 | 0.661 | 0.01 | 0.235741 | 0.05557367 | 22.98723 | -0.4336  | 35.49 |
| 629    | 2016 | 0.355 | 0.01 | 0.235741 | 0.05557367 | 22.98723 | -0.4336  | 35.49 |
| 629    | 2016 | 0.661 | 0.01 | 0.235741 | 0.05557367 | 22.98723 | -0.4336  | 35.49 |
| 629    | 2016 | 0.661 | 0.01 | 0.235741 | 0.05557367 | 22.98723 | -0.4336  | 35.49 |
| 629    | 2016 | 0.355 | 0.01 | 0.235741 | 0.05557367 | 22.98723 | -0.4336  | 35.49 |
| 949    | 2016 | 0.673 | 0.03 | 1.515732 | 2.2974431  | 22.46349 | 0.032147 | 30.17 |
| 2007   | 2016 | 0.881 | 0.03 | 1.515732 | 2.2974431  | 22.26023 | 0.17391  | 17.84 |
| 2007   | 2016 | 0.881 | 0.03 | 1.515732 | 2.2974431  | 22.26023 | 0.17391  | 17.84 |
| 949    | 2016 | 0.191 | 0.03 | 1.515732 | 2.2974431  | 22.46324 | 0.032147 | 30.17 |
| 949    | 2016 | 0.143 | 0.03 | 1.515732 | 2.2974431  | 22.46324 | 0.032147 | 30.17 |
| 2007   | 2016 | 0.881 | 0.03 | 1.515732 | 2.2974431  | 22.26023 | 0.17391  | 17.84 |
| 2007   | 2016 | 0.15  | 0.03 | 1.515732 | 2.2974431  | 22.26023 | 0.17391  | 17.84 |
| 2007   | 2016 | -0.16 | 0.03 | 1.515732 | 2.2974431  | 22.26023 | 0.17391  | 17.84 |
| 2007   | 2016 | 0.881 | 0.03 | 1.515732 | 2.2974431  | 22.26023 | 0.17391  | 17.84 |
| 2007   | 2016 | 0.394 | 0.03 | 1.515732 | 2.2974431  | 22.26023 | 0.17391  | 17.84 |
| 2007   | 2016 | 0.881 | 0.03 | 1.515732 | 2.2974431  | 21.89963 | 0.17391  | 17.84 |
| 949    | 2016 | 0.673 | 0.03 | 1.515732 | 2.2974431  | 22.46349 | 0.032147 | 30.17 |
| 949    | 2016 | 0.143 | 0.03 | 1.515732 | 2.2974431  | 22.46349 | 0.032147 | 30.17 |
| 2409   | 2016 | 0.749 | 0.01 | 1.247562 | 1.5564118  | 21.33302 | 0.044554 | 30.23 |
| 300031 | 2016 | 0.403 | 0.01 | 1.247562 | 1.5564118  | 21.85539 | 0.073116 | 22.75 |
| 700    | 2016 | -0.43 | 0.01 | 1.247562 | 1.5564118  | 22.50403 | 0.059991 | 33.07 |
| 600398 | 2016 | -0.39 | 0.01 | 1.247562 | 1.5564118  | 23.60058 | 0.302158 | 39.31 |
| 2610   | 2016 | -0.43 | 0.01 | 1.247562 | 1.5564118  | 23.52713 | 0.026778 | 15.66 |
| 300320 | 2016 | -0.03 | 0.01 | 1.247562 | 1.5564118  | 20.87186 | 0.098456 | 19.66 |
| 581    | 2016 | 0.271 | 0.01 | 1.247562 | 1.5564118  | 23.57188 | 0.128821 | 20.22 |
| 600481 | 2016 | 0.189 | 0.01 | 1.247562 | 1.5564118  | 22.21494 | 0.067348 | 34.33 |
| 2395   | 2016 | -0.26 | 0.01 | 1.247562 | 1.5564118  | 20.94583 | 0.058017 | 64.73 |
| 300031 | 2016 | 0.005 | 0.01 | 1.247562 | 1.5564118  | 21.85539 | 0.073116 | 22.75 |
| 600475 | 2016 | 0.134 | 0.01 | 1.247562 | 1.5564118  | 22.39251 | 0.085152 | 45.12 |
| 2610   | 2016 | -0.23 | 0.01 | 1.247562 | 1.5564118  | 23.52713 | 0.026778 | 15.66 |
| 600667 | 2016 | -0.39 | 0.01 | 1.247562 | 1.5564118  | 23.46355 | 0.083172 | 44.94 |
| 936    | 2016 | -0.99 | 0.01 | 1.247562 | 1.5564118  | 22.89333 | 0.122867 | 44.2  |
| 2610   | 2016 | -0.43 | 0.01 | 1.247562 | 1.5564118  | 23.52713 | 0.026778 | 15.66 |
| 581    | 2016 | 0.26  | 0.01 | 1.247562 | 1.5564118  | 23.57188 | 0.128821 | 20.22 |
| 581    | 2016 | 0.26  | 0.01 | 1.247562 | 1.5564118  | 23.57188 | 0.128821 | 20.22 |
| 700    | 2016 | -0.43 | 0.01 | 1.247562 | 1.5564118  | 22.50403 | 0.059991 | 33.07 |
| 2540   | 2016 | -0.37 | 0.01 | 1.247562 | 1.5564118  | 21.91054 | 0.100578 | 42.49 |
| 600584 | 2016 | 0.216 | 0.01 | 1.247562 | 1.5564118  | 24.11506 | -0.04738 | 18.37 |
| 581    | 2016 | 0.605 | 0.01 | 1.247562 | 1.5564118  | 23.57188 | 0.128821 | 20.22 |
| 2471   | 2016 | -0.16 | 0.01 | 1.247562 | 1.5564118  | 22.8647  | 0.048429 | 37.08 |
| 2471   | 2016 | 0.479 | 0.01 | 1.247562 | 1.5564118  | 22.8647  | 0.048429 | 37.08 |
| 2692   | 2016 | 0.172 | 0.01 | 1.247562 | 1.5564118  | 21.7556  | 0.064199 | 22.18 |

|        |      |       |      |          |           |          |          |       |
|--------|------|-------|------|----------|-----------|----------|----------|-------|
| 300450 | 2016 | -0.04 | 0.01 | 1.247562 | 1.5564118 | 21.60527 | 0.302158 | 40.58 |
| 600398 | 2016 | -0.39 | 0.01 | 1.247562 | 1.5564118 | 23.9169  | 0.302158 | 39.31 |
| 600584 | 2016 | -0.45 | 0.01 | 1.247562 | 1.5564118 | 24.11506 | -0.04738 | 18.37 |
| 2409   | 2016 | 0.749 | 0.01 | 1.247562 | 1.5564118 | 21.33302 | 0.044554 | 30.23 |
| 2471   | 2016 | -0.16 | 0.01 | 1.247562 | 1.5564118 | 22.8647  | 0.048429 | 37.08 |
| 600667 | 2016 | -0.47 | 0.01 | 1.247562 | 1.5564118 | 23.46355 | 0.083172 | 44.94 |
| 700    | 2016 | -0.48 | 0.01 | 1.247562 | 1.5564118 | 22.50403 | 0.059991 | 33.07 |
| 600370 | 2016 | 0.215 | 0.01 | 1.247562 | 1.5564118 | 21.25221 | 0.0435   | 50.33 |
| 2455   | 2016 | 0.008 | 0.01 | 1.247562 | 1.5564118 | 21.39205 | 0.094    | 34.66 |
| 2610   | 2016 | -0.43 | 0.01 | 1.247562 | 1.5564118 | 23.52713 | 0.026778 | 15.66 |
| 2471   | 2016 | 0.096 | 0.01 | 1.247562 | 1.5564118 | 22.8647  | 0.048429 | 37.08 |
| 300495 | 2016 | -0.2  | 0.01 | 1.247562 | 1.5564118 | 22.0536  | 0.080158 | 41.53 |
| 2471   | 2016 | -0.16 | 0.01 | 1.247562 | 1.5564118 | 22.8647  | 0.048429 | 37.08 |
| 2455   | 2016 | 0.008 | 0.01 | 1.247562 | 1.5564118 | 21.39205 | 0.094    | 34.66 |
| 936    | 2016 | -0.99 | 0.01 | 1.247562 | 1.5564118 | 22.9119  | 0.122867 | 44.2  |
| 890    | 2016 | -0.4  | 0.01 | 1.247562 | 1.5564118 | 22.89695 | 0.16979  | 21.07 |
| 2471   | 2016 | -0.16 | 0.01 | 1.247562 | 1.5564118 | 22.41531 | 0.048429 | 37.08 |
| 581    | 2016 | 0.213 | 0.01 | 1.247562 | 1.5564118 | 23.57188 | 0.128821 | 20.22 |
| 300279 | 2016 | 0.347 | 0.01 | 1.247562 | 1.5564118 | 21.74334 | 0.055817 | 21.56 |
| 700    | 2016 | -0.43 | 0.01 | 1.247562 | 1.5564118 | 22.50403 | 0.059991 | 33.07 |
| 2692   | 2016 | -0.18 | 0.01 | 1.247562 | 1.5564118 | 21.7556  | 0.064199 | 22.18 |
| 600398 | 2016 | -0.29 | 0.01 | 1.247562 | 1.5564118 | 23.9169  | 0.302158 | 39.31 |
| 600667 | 2016 | -0.12 | 0.01 | 1.247562 | 1.5564118 | 23.46355 | 0.083172 | 44.94 |
| 600398 | 2016 | -0.39 | 0.01 | 1.247562 | 1.5564118 | 23.9169  | 0.302158 | 39.31 |
| 2645   | 2016 | -0.16 | 0.01 | 1.247562 | 1.5564118 | 21.33232 | 0.039457 | 49.69 |
| 600667 | 2016 | -0.56 | 0.01 | 1.247562 | 1.5564118 | 23.46355 | 0.083172 | 44.94 |
| 2692   | 2016 | 0.12  | 0.01 | 1.247562 | 1.5564118 | 21.7556  | 0.064199 | 22.18 |
| 738    | 2016 | 0.722 | 0.01 | 1.247562 | 1.5564118 | 22.64709 | 0.040361 | 23.34 |
| 300495 | 2016 | -0.78 | 0.01 | 1.247562 | 1.5564118 | 22.30076 | 0.080158 | 41.53 |
| 300135 | 2016 | 0.865 | 0.01 | 1.247562 | 1.5564118 | 21.78875 | 0.021321 | 30.08 |
| 600398 | 2016 | -0.39 | 0.01 | 1.247562 | 1.5564118 | 23.9169  | 0.302158 | 39.31 |
| 300495 | 2016 | -0.86 | 0.01 | 1.247562 | 1.5564118 | 22.30076 | 0.080158 | 41.53 |
| 936    | 2016 | -0.99 | 0.01 | 1.247562 | 1.5564118 | 22.89333 | 0.122867 | 44.2  |
| 2610   | 2016 | -0.78 | 0.01 | 1.247562 | 1.5564118 | 23.52713 | 0.026778 | 15.66 |
| 300135 | 2016 | 0.192 | 0.01 | 1.247562 | 1.5564118 | 21.78875 | 0.021321 | 30.08 |
| 2471   | 2016 | 0.758 | 0.01 | 1.247562 | 1.5564118 | 22.8647  | 0.048429 | 37.08 |
| 600481 | 2016 | 0.2   | 0.01 | 1.247562 | 1.5564118 | 22.21494 | 0.067348 | 34.33 |
| 600481 | 2016 | 0.189 | 0.01 | 1.247562 | 1.5564118 | 22.21494 | 0.067348 | 34.33 |
| 738    | 2016 | -0.6  | 0.01 | 1.247562 | 1.5564118 | 22.64709 | 0.040361 | 23.34 |
| 600475 | 2016 | 0.134 | 0.01 | 1.247562 | 1.5564118 | 22.39251 | 0.085152 | 45.12 |
| 603988 | 2016 | 0.485 | 0.01 | 1.247562 | 1.5564118 | 20.54399 | 0.03698  | 30    |
| 600370 | 2016 | 0.215 | 0.01 | 1.247562 | 1.5564118 | 21.25221 | 0.0435   | 50.33 |
| 738    | 2016 | -0.6  | 0.01 | 1.247562 | 1.5564118 | 22.16339 | 0.040361 | 23.34 |
| 738    | 2016 | 0.28  | 0.01 | 1.247562 | 1.5564118 | 22.64709 | 0.040361 | 23.34 |
| 600475 | 2016 | 0.154 | 0.01 | 1.247562 | 1.5564118 | 22.39251 | 0.085152 | 45.12 |
| 600481 | 2016 | 0.2   | 0.01 | 1.247562 | 1.5564118 | 22.21494 | 0.067348 | 34.33 |
| 600481 | 2016 | 0.189 | 0.01 | 1.247562 | 1.5564118 | 22.21494 | 0.067348 | 34.33 |
| 600370 | 2016 | 0.215 | 0.01 | 1.247562 | 1.5564118 | 21.25221 | 0.0435   | 50.33 |
| 581    | 2016 | 0.277 | 0.01 | 1.247562 | 1.5564118 | 23.57188 | 0.128821 | 20.22 |
| 300337 | 2016 | 0.658 | 0.01 | 1.247562 | 1.5564118 | 21.66116 | 0.004535 | 34.44 |
| 2692   | 2016 | -0.18 | 0.01 | 1.247562 | 1.5564118 | 21.7556  | 0.064199 | 22.18 |
| 2009   | 2016 | 0.423 | 0.01 | 1.247562 | 1.5564118 | 22.29564 | 0.045776 | 16.84 |
| 600584 | 2016 | 0.631 | 0.01 | 1.247562 | 1.5564118 | 24.11506 | -0.04738 | 18.37 |
| 300135 | 2016 | 0.192 | 0.01 | 1.247562 | 1.5564118 | 21.59641 | 0.021321 | 30.08 |

|        |      |       |      |          |           |          |          |       |
|--------|------|-------|------|----------|-----------|----------|----------|-------|
| 700    | 2016 | -0.43 | 0.01 | 1.247562 | 1.5564118 | 22.50403 | 0.059991 | 33.07 |
| 2009   | 2016 | -0.67 | 0.01 | 1.247562 | 1.5564118 | 22.29564 | 0.045776 | 16.84 |
| 300385 | 2016 | 0.11  | 0.01 | 1.247562 | 1.5564118 | 21.2045  | 0.12278  | 39.24 |
| 581    | 2016 | 0.26  | 0.01 | 1.247562 | 1.5564118 | 23.57188 | 0.128821 | 20.22 |
| 2445   | 2016 | -0.3  | 0.01 | 1.247562 | 1.5564118 | 22.42029 | 0.057517 | 29.95 |
| 300337 | 2016 | 0.367 | 0.01 | 1.247562 | 1.5564118 | 21.66116 | 0.004535 | 34.44 |
| 2009   | 2016 | 0.423 | 0.01 | 1.247562 | 1.5564118 | 22.29564 | 0.045776 | 16.84 |
| 2009   | 2016 | -0.21 | 0.01 | 1.247562 | 1.5564118 | 22.29564 | 0.045776 | 16.84 |
| 300337 | 2016 | 0.658 | 0.01 | 1.247562 | 1.5564118 | 21.66295 | 0.004535 | 34.44 |
| 300337 | 2016 | 0.374 | 0.01 | 1.247562 | 1.5564118 | 21.66116 | 0.004535 | 34.44 |
| 600400 | 2016 | -0.44 | 0.01 | 1.247562 | 1.5564118 | 23.01005 | 0.039453 | 51.5  |
| 890    | 2016 | -0.4  | 0.01 | 1.247562 | 1.5564118 | 22.89695 | 0.16979  | 21.07 |
| 581    | 2016 | -0.4  | 0.01 | 1.247562 | 1.5564118 | 23.22529 | 0.128821 | 20.22 |
| 600398 | 2016 | -0.97 | 0.01 | 1.247562 | 1.5564118 | 23.9169  | 0.302158 | 39.31 |
| 2471   | 2016 | -0.57 | 0.01 | 1.247562 | 1.5564118 | 22.8647  | 0.048429 | 37.08 |
| 2445   | 2016 | -0.88 | 0.01 | 1.247562 | 1.5564118 | 22.56461 | 0.057517 | 29.95 |
| 2610   | 2016 | -0.43 | 0.01 | 1.247562 | 1.5564118 | 23.52713 | 0.026778 | 15.66 |
| 890    | 2016 | -0.23 | 0.01 | 1.247562 | 1.5564118 | 22.89695 | 0.16979  | 21.07 |
| 600584 | 2016 | 0.195 | 0.01 | 1.247562 | 1.5564118 | 24.11506 | -0.04738 | 18.37 |
| 600584 | 2016 | -0.07 | 0.01 | 1.247562 | 1.5564118 | 23.21336 | -0.04738 | 18.37 |
| 600584 | 2016 | -0    | 0.01 | 1.247562 | 1.5564118 | 24.11506 | -0.04738 | 18.37 |
| 600584 | 2016 | 0.056 | 0.01 | 1.247562 | 1.5564118 | 24.11506 | -0.04738 | 18.37 |
| 2540   | 2016 | -0.33 | 0.01 | 1.247562 | 1.5564118 | 21.91054 | 0.100578 | 42.49 |
| 581    | 2016 | 0.922 | 0.01 | 1.247562 | 1.5564118 | 23.57188 | 0.128821 | 20.22 |
| 2009   | 2016 | 0.423 | 0.01 | 1.247562 | 1.5564118 | 22.29564 | 0.045776 | 16.84 |
| 2445   | 2016 | -0.88 | 0.01 | 1.247562 | 1.5564118 | 22.56461 | 0.057517 | 29.95 |
| 600475 | 2016 | -0.51 | 0.01 | 1.247562 | 1.5564118 | 22.39251 | 0.085152 | 45.12 |
| 2455   | 2016 | 0.008 | 0.01 | 1.247562 | 1.5564118 | 21.39205 | 0.094    | 34.66 |
| 600481 | 2016 | 0.851 | 0.01 | 1.247562 | 1.5564118 | 22.21494 | 0.067348 | 34.33 |
| 2009   | 2016 | -0.47 | 0.01 | 1.247562 | 1.5564118 | 22.29564 | 0.045776 | 16.84 |
| 581    | 2016 | 0.165 | 0.01 | 1.247562 | 1.56E+00  | 23.57188 | 0.128821 | 20.22 |
| 300385 | 2016 | 0.11  | 0.01 | 1.247562 | 1.56E+00  | 21.2045  | 0.12278  | 39.24 |
| 600667 | 2016 | -0.12 | 0.01 | 1.247562 | 1.56E+00  | 23.46355 | 0.083172 | 44.94 |
| 2395   | 2016 | 0.769 | 0.01 | 1.247562 | 1.56E+00  | 20.94583 | 0.058017 | 64.73 |
| 2009   | 2016 | -0.3  | 0.01 | 1.247562 | 1.56E+00  | 22.29564 | 0.045776 | 16.84 |
| 600667 | 2016 | -0.03 | 0.01 | 1.247562 | 1.56E+00  | 23.46355 | 0.083172 | 44.94 |
| 300135 | 2016 | 0.342 | 0.01 | 1.247562 | 1.56E+00  | 21.78875 | 0.021321 | 30.08 |
| 300279 | 2016 | 0.347 | 0.01 | 1.247562 | 1.5564118 | 21.6053  | 0.055817 | 21.56 |
| 2009   | 2016 | -0.31 | 0.01 | 1.247562 | 1.5564118 | 22.29564 | 0.045776 | 16.84 |
| 2610   | 2016 | -0.43 | 0.01 | 1.247562 | 1.5564118 | 23.52713 | 0.026778 | 15.66 |
| 2009   | 2016 | 0.423 | 0.01 | 1.247562 | 1.5564118 | 21.85331 | 0.045776 | 16.84 |
| 2610   | 2016 | -0.52 | 0.01 | 1.247562 | 1.5564118 | 23.52713 | 0.026778 | 15.66 |
| 600398 | 2016 | -0.39 | 0.01 | 1.247562 | 1.5564118 | 23.9169  | 0.302158 | 39.31 |
| 2409   | 2016 | 0.749 | 0.01 | 1.247562 | 1.5564118 | 21.33302 | 0.044554 | 30.23 |
| 2409   | 2016 | 0.749 | 0.01 | 1.247562 | 1.5564118 | 21.33302 | 0.044554 | 30.23 |
| 600220 | 2016 | -0.42 | 0.01 | 1.247562 | 1.5564118 | 22.22792 | 0.081085 | 8.448 |
| 300135 | 2016 | 0.08  | 0.01 | 1.247562 | 1.5564118 | 21.78875 | 0.021321 | 30.08 |
| 300320 | 2016 | -0.03 | 0.01 | 1.247562 | 1.5564118 | 20.91447 | 0.098456 | 19.66 |
| 2009   | 2016 | -0.3  | 0.01 | 1.247562 | 1.5564118 | 22.29564 | 0.045776 | 16.84 |
| 2471   | 2016 | -0.57 | 0.01 | 1.247562 | 1.5564118 | 22.8647  | 0.048429 | 37.08 |
| 600220 | 2016 | -0.42 | 0.01 | 1.247562 | 1.5564118 | 22.22792 | 0.081085 | 8.448 |
| 300135 | 2016 | 0.192 | 0.01 | 1.247562 | 1.5564118 | 21.78875 | 0.021321 | 30.08 |
| 300135 | 2016 | 0.276 | 0.01 | 1.247562 | 1.5564118 | 21.78875 | 0.021321 | 30.08 |
| 2645   | 2016 | -0.24 | 0.01 | 1.247562 | 1.5564118 | 21.33232 | 0.039457 | 49.69 |



|        |      |       |      |          |           |          |          |       |
|--------|------|-------|------|----------|-----------|----------|----------|-------|
| 936    | 2016 | -0.99 | 0.01 | 1.247562 | 1.5564118 | 22.89333 | 0.122867 | 44.2  |
| 2471   | 2016 | -0.57 | 0.01 | 1.247562 | 1.5564118 | 22.8647  | 0.048429 | 37.08 |
| 600398 | 2016 | -0.39 | 0.01 | 1.247562 | 1.5564118 | 23.9169  | 0.302158 | 39.31 |
| 2540   | 2016 | -0.37 | 0.01 | 1.247562 | 1.5564118 | 21.91054 | 0.100578 | 42.49 |
| 600475 | 2016 | -0.51 | 0.01 | 1.247562 | 1.5564118 | 22.39251 | 0.085152 | 45.12 |
| 300495 | 2016 | -0.77 | 0.01 | 1.247562 | 1.5564118 | 22.30076 | 0.080158 | 41.53 |
| 2409   | 2016 | 0.749 | 0.01 | 1.247562 | 1.5564118 | 21.33302 | 0.044554 | 30.23 |
| 2395   | 2016 | -0.12 | 0.01 | 1.247562 | 1.5564118 | 20.94583 | 0.058017 | 64.73 |
| 300279 | 2016 | -0.65 | 0.01 | 1.247562 | 1.5564118 | 21.74334 | 0.055817 | 21.56 |
| 936    | 2016 | -0.99 | 0.01 | 1.247562 | 1.5564118 | 22.89333 | 0.122867 | 44.2  |
| 600481 | 2016 | 0.189 | 0.01 | 1.247562 | 1.5564118 | 22.21494 | 0.067348 | 34.33 |
| 600475 | 2016 | -0.19 | 0.01 | 1.247562 | 1.5564118 | 22.39251 | 0.085152 | 45.12 |
| 890    | 2016 | -0.45 | 0.01 | 1.247562 | 1.5564118 | 22.89695 | 0.16979  | 21.07 |
| 2409   | 2016 | 0.749 | 0.01 | 1.247562 | 1.5564118 | 21.28395 | 0.044554 | 30.23 |
| 2692   | 2016 | 0.325 | 0.01 | 1.247562 | 1.5564118 | 21.7556  | 0.064199 | 22.18 |
| 2610   | 2016 | -0.43 | 0.01 | 1.247562 | 1.5564118 | 23.52713 | 0.026778 | 15.66 |
| 700    | 2016 | -0.43 | 0.01 | 1.247562 | 1.5564118 | 22.50403 | 0.059991 | 33.07 |
| 600481 | 2016 | 0.2   | 0.01 | 1.247562 | 1.5564118 | 22.21494 | 0.067348 | 34.33 |
| 300495 | 2016 | -0.49 | 0.01 | 1.247562 | 1.5564118 | 22.30076 | 0.080158 | 41.53 |
| 581    | 2016 | 0.433 | 0.01 | 1.247562 | 1.5564118 | 23.57188 | 0.128821 | 20.22 |
| 2692   | 2016 | 0.172 | 0.01 | 1.247562 | 1.5564118 | 21.7556  | 0.064199 | 22.18 |
| 603988 | 2016 | 0.485 | 0.01 | 1.247562 | 1.5564118 | 20.54399 | 0.03698  | 30    |
| 300495 | 2016 | -0.16 | 0.01 | 1.247562 | 1.5564118 | 22.30076 | 0.080158 | 41.53 |
| 2692   | 2016 | 0.073 | 0.01 | 1.247562 | 1.5564118 | 21.7556  | 0.064199 | 22.18 |
| 2471   | 2016 | 0.065 | 0.01 | 1.247562 | 1.5564118 | 22.8647  | 0.048429 | 37.08 |
| 300031 | 2016 | -0.28 | 0.01 | 1.247562 | 1.5564118 | 21.85539 | 0.073116 | 22.75 |
| 300450 | 2016 | -0.04 | 0.01 | 1.247562 | 1.5564118 | 21.60527 | 0.302158 | 40.58 |
| 300450 | 2016 | -0.04 | 0.01 | 1.247562 | 1.5564118 | 21.60675 | 0.302158 | 40.58 |
| 2471   | 2016 | -0.24 | 0.01 | 1.247562 | 1.5564118 | 22.8647  | 0.048429 | 37.08 |
| 600667 | 2016 | 0.095 | 0.01 | 1.247562 | 1.5564118 | 23.46355 | 0.083172 | 44.94 |
| 2645   | 2016 | -0.28 | 0.01 | 1.247562 | 1.5564118 | 21.33232 | 0.039457 | 49.69 |
| 890    | 2016 | -0.45 | 0.01 | 1.247562 | 1.5564118 | 22.89695 | 0.16979  | 21.07 |
| 700    | 2016 | -0.67 | 0.01 | 1.247562 | 1.5564118 | 22.50403 | 0.059991 | 33.07 |
| 2009   | 2016 | -0.3  | 0.01 | 1.247562 | 1.5564118 | 22.29564 | 0.045776 | 16.84 |
| 2009   | 2016 | -0.67 | 0.01 | 1.247562 | 1.5564118 | 22.29564 | 0.045776 | 16.84 |
| 300279 | 2016 | -0.65 | 0.01 | 1.247562 | 1.5564118 | 21.74334 | 0.055817 | 21.56 |
| 700    | 2016 | -0.43 | 0.01 | 1.247562 | 1.5564118 | 22.32717 | 0.059991 | 33.07 |
| 738    | 2016 | -0.6  | 0.01 | 1.247562 | 1.5564118 | 22.64709 | 0.040361 | 23.34 |
| 2645   | 2016 | -0.16 | 0.01 | 1.247562 | 1.5564118 | 21.33232 | 0.039457 | 49.69 |
| 600481 | 2016 | 0.233 | 0.01 | 1.247562 | 1.5564118 | 22.13326 | 0.067348 | 34.33 |
| 700    | 2016 | -0.43 | 0.01 | 1.247562 | 1.5564118 | 22.50403 | 0.059991 | 33.07 |
| 738    | 2016 | 0.28  | 0.01 | 1.247562 | 1.5564118 | 22.64709 | 0.040361 | 23.34 |
| 581    | 2016 | 0.22  | 0.01 | 1.247562 | 1.5564118 | 23.57188 | 0.128821 | 20.22 |
| 2455   | 2016 | 0.008 | 0.01 | 1.247562 | 1.5564118 | 20.63003 | 0.094    | 34.66 |
| 600475 | 2016 | 0.154 | 0.01 | 1.247562 | 1.5564118 | 22.39251 | 0.085152 | 45.12 |
| 300279 | 2016 | 0.347 | 0.01 | 1.247562 | 1.5564118 | 21.74334 | 0.055817 | 21.56 |
| 600475 | 2016 | 0.12  | 0.01 | 1.247562 | 1.5564118 | 22.39251 | 0.085152 | 45.12 |
| 2610   | 2016 | -0.43 | 0.01 | 1.247562 | 1.5564118 | 23.52713 | 0.026778 | 15.66 |
| 2445   | 2016 | -0.22 | 0.01 | 1.247562 | 1.5564118 | 22.56461 | 0.057517 | 29.95 |
| 581    | 2016 | 0.26  | 0.01 | 1.247562 | 1.5564118 | 23.57188 | 0.128821 | 20.22 |
| 300450 | 2016 | -0.04 | 0.01 | 1.247562 | 1.5564118 | 21.60527 | 0.302158 | 40.58 |
| 600584 | 2016 | -0.03 | 0.01 | 1.247562 | 1.5564118 | 24.11506 | -0.04738 | 18.37 |
| 300337 | 2016 | 0.367 | 0.01 | 1.247562 | 1.5564118 | 21.66116 | 0.004535 | 34.44 |
| 300385 | 2016 | 0.11  | 0.01 | 1.247562 | 1.5564118 | 21.2045  | 0.12278  | 39.24 |

|        |      |       |      |          |           |          |          |       |
|--------|------|-------|------|----------|-----------|----------|----------|-------|
| 300385 | 2016 | 0.11  | 0.01 | 1.247562 | 1.5564118 | 21.2045  | 0.12278  | 39.24 |
| 300385 | 2016 | 0.11  | 0.01 | 1.247562 | 1.5564118 | 21.08533 | 0.12278  | 39.24 |
| 2540   | 2016 | -0.31 | 0.01 | 1.247562 | 1.5564118 | 21.91054 | 0.100578 | 42.49 |
| 600481 | 2016 | 0.189 | 0.01 | 1.247562 | 1.5564118 | 22.21494 | 0.067348 | 34.33 |
| 600667 | 2016 | -0.12 | 0.01 | 1.247562 | 1.5564118 | 23.46355 | 0.083172 | 44.94 |
| 600400 | 2016 | -0.44 | 0.01 | 1.247562 | 1.5564118 | 22.34642 | 0.039453 | 51.5  |
| 300031 | 2016 | 0.668 | 0.01 | 1.247562 | 1.5564118 | 21.72059 | 0.073116 | 22.75 |
| 300279 | 2016 | 0.678 | 0.01 | 1.247562 | 1.5564118 | 21.74334 | 0.055817 | 21.56 |
| 300135 | 2016 | 0.865 | 0.01 | 1.247562 | 1.5564118 | 21.78875 | 0.021321 | 30.08 |
| 2009   | 2016 | -0.32 | 0.01 | 1.247562 | 1.5564118 | 22.29564 | 0.045776 | 16.84 |
| 2395   | 2016 | 0.769 | 0.01 | 1.247562 | 1.5564118 | 20.94583 | 0.058017 | 64.73 |
| 600667 | 2016 | 0.098 | 0.01 | 1.247562 | 1.5564118 | 22.26767 | 0.083172 | 44.94 |
| 2471   | 2016 | -0.57 | 0.01 | 1.247562 | 1.5564118 | 22.8647  | 0.048429 | 37.08 |
| 2540   | 2016 | -0.34 | 0.01 | 1.247562 | 1.5564118 | 21.71938 | 0.100578 | 42.49 |
| 2610   | 2016 | -0.69 | 0.01 | 1.247562 | 1.5564118 | 22.89866 | 0.026778 | 15.66 |
| 2009   | 2016 | 0.423 | 0.01 | 1.247562 | 1.5564118 | 22.29564 | 0.045776 | 16.84 |
| 603988 | 2016 | 0.485 | 0.01 | 1.247562 | 1.5564118 | 20.54399 | 0.03698  | 30    |
| 600220 | 2016 | -0.42 | 0.01 | 1.247562 | 1.5564118 | 22.19361 | 0.081085 | 8.448 |
| 2645   | 2016 | -0.28 | 0.01 | 1.247562 | 1.5564118 | 21.23911 | 0.039457 | 49.69 |
| 300031 | 2016 | 0.138 | 0.01 | 1.247562 | 1.5564118 | 21.85539 | 0.073116 | 22.75 |
| 2009   | 2016 | -0.45 | 0.01 | 1.247562 | 1.5564118 | 22.29564 | 0.045776 | 16.84 |
| 2471   | 2016 | 0.758 | 0.01 | 1.247562 | 1.5564118 | 22.8647  | 0.048429 | 37.08 |
| 2540   | 2016 | -0.59 | 0.01 | 1.247562 | 1.5564118 | 21.91054 | 0.100578 | 42.49 |
| 600475 | 2016 | 0.154 | 0.01 | 1.247562 | 1.5564118 | 21.96814 | 0.085152 | 45.12 |
| 600475 | 2016 | 0.154 | 0.01 | 1.247562 | 1.5564118 | 22.39251 | 0.085152 | 45.12 |
| 600584 | 2016 | -0.26 | 0.01 | 1.247562 | 1.5564118 | 24.11506 | -0.04738 | 18.37 |
| 890    | 2016 | -0.45 | 0.01 | 1.247562 | 1.5564118 | 22.89695 | 0.16979  | 21.07 |
| 581    | 2016 | 0.26  | 0.01 | 1.247562 | 1.5564118 | 23.57188 | 0.128821 | 20.22 |
| 300279 | 2016 | 0.678 | 0.01 | 1.247562 | 1.5564118 | 21.74334 | 0.055817 | 21.56 |
| 600370 | 2016 | 0.215 | 0.01 | 1.247562 | 1.5564118 | 21.25221 | 0.0435   | 50.33 |
| 300495 | 2016 | -0.86 | 0.01 | 1.247562 | 1.5564118 | 22.30076 | 0.080158 | 41.53 |
| 700    | 2016 | -0.67 | 0.01 | 1.247562 | 1.5564118 | 22.50403 | 0.059991 | 33.07 |
| 600475 | 2016 | 0.072 | 0.01 | 1.247562 | 1.5564118 | 22.39251 | 0.085152 | 45.12 |
| 2471   | 2016 | -0.17 | 0.01 | 1.247562 | 1.5564118 | 22.8647  | 0.048429 | 37.08 |
| 2455   | 2016 | 0.008 | 0.01 | 1.247562 | 1.5564118 | 21.39205 | 0.094    | 34.66 |
| 2009   | 2016 | 0.423 | 0.01 | 1.247562 | 1.5564118 | 22.29564 | 0.045776 | 16.84 |
| 300135 | 2016 | 0.192 | 0.01 | 1.247562 | 1.5564118 | 21.78875 | 0.021321 | 30.08 |
| 890    | 2016 | -0.45 | 0.01 | 1.247562 | 1.5564118 | 21.89432 | 0.16979  | 21.07 |
| 2395   | 2016 | -0.26 | 0.01 | 1.247562 | 1.5564118 | 20.69611 | 0.058017 | 64.73 |
| 2409   | 2016 | 0.749 | 0.01 | 1.247562 | 1.5564118 | 21.33302 | 0.044554 | 30.23 |
| 600667 | 2016 | -0.29 | 0.01 | 1.247562 | 1.5564118 | 23.46355 | 0.083172 | 44.94 |
| 300031 | 2016 | 0.403 | 0.01 | 1.247562 | 1.5564118 | 21.85539 | 0.073116 | 22.75 |
| 600370 | 2016 | 0.215 | 0.01 | 1.247562 | 1.5564118 | 20.83022 | 0.0435   | 50.33 |
| 581    | 2016 | 0.199 | 0.01 | 1.247562 | 1.5564118 | 23.57188 | 0.128821 | 20.22 |
| 600584 | 2016 | 0.195 | 0.01 | 1.247562 | 1.5564118 | 24.11506 | -0.04738 | 18.37 |
| 600400 | 2016 | -0.44 | 0.01 | 1.247562 | 1.5564118 | 23.01005 | 0.039453 | 51.5  |
| 2692   | 2016 | 0.017 | 0.01 | 1.247562 | 1.5564118 | 21.63523 | 0.064199 | 22.18 |
| 300031 | 2016 | -0.13 | 0.01 | 1.247562 | 1.5564118 | 21.85539 | 0.073116 | 22.75 |
| 2445   | 2016 | -0.3  | 0.01 | 1.247562 | 1.5564118 | 22.56461 | 0.057517 | 29.95 |
| 2009   | 2016 | -0.37 | 0.01 | 1.247562 | 1.5564118 | 22.29564 | 0.045776 | 16.84 |
| 600584 | 2016 | 0.251 | 0.01 | 1.247562 | 1.5564118 | 24.11506 | -0.04738 | 18.37 |
| 600475 | 2016 | 0.154 | 0.01 | 1.247562 | 1.5564118 | 22.39251 | 0.085152 | 45.12 |
| 738    | 2016 | -0.6  | 0.01 | 1.247562 | 1.5564118 | 22.64709 | 0.040361 | 23.34 |
| 2471   | 2016 | -0.02 | 0.01 | 1.247562 | 1.5564118 | 22.8647  | 0.048429 | 37.08 |

|        |      |       |      |          |           |          |          |       |
|--------|------|-------|------|----------|-----------|----------|----------|-------|
| 890    | 2016 | -0.89 | 0.01 | 1.247562 | 1.5564118 | 22.89695 | 0.16979  | 21.07 |
| 300320 | 2016 | -0.03 | 0.01 | 1.247562 | 1.5564118 | 20.91447 | 0.098456 | 19.66 |
| 581    | 2016 | 0.277 | 0.01 | 1.247562 | 1.5564118 | 23.57188 | 0.128821 | 20.22 |
| 2540   | 2016 | 0.051 | 0.01 | 1.247562 | 1.5564118 | 21.91054 | 0.100578 | 42.49 |
| 600584 | 2016 | 0.631 | 0.01 | 1.247562 | 1.5564118 | 24.11506 | -0.04738 | 18.37 |
| 2540   | 2016 | -0.33 | 0.01 | 1.247562 | 1.5564118 | 21.91054 | 0.100578 | 42.49 |
| 600096 | 2016 | 0.386 | 0    | 1.680534 | 2.8241939 | 24.93871 | -0.4336  | 45.94 |
| 538    | 2016 | 0.475 | 0    | 1.680534 | 2.8241939 | 23.57358 | 0.18499  | 41.52 |
| 807    | 2016 | 0.098 | 0    | 1.680534 | 2.8241939 | 24.18673 | 0.020953 | 42.57 |
| 600792 | 2016 | -0.72 | 0    | 1.680534 | 2.8241939 | 22.58167 | 0.018685 | 60.19 |
| 948    | 2016 | 1.136 | 0    | 1.680534 | 2.8241939 | 21.68809 | 0.015425 | 26.88 |
| 600792 | 2016 | -0.72 | 0    | 1.680534 | 2.8241939 | 22.58167 | 0.018685 | 60.19 |
| 878    | 2016 | 0.453 | 0    | 1.680534 | 2.8241939 | 23.58756 | 0.026358 | 45.01 |
| 600792 | 2016 | -0.79 | 0    | 1.680534 | 2.8241939 | 22.58167 | 0.018685 | 60.19 |
| 538    | 2016 | 0.034 | 0    | 1.680534 | 2.8241939 | 23.92547 | 0.18499  | 41.52 |
| 807    | 2016 | -0.35 | 0    | 1.680534 | 2.8241939 | 24.18673 | 0.020953 | 42.57 |
| 600096 | 2016 | -0.94 | 0    | 1.680534 | 2.8241939 | 24.93871 | -0.4336  | 45.94 |
| 600422 | 2016 | 0.478 | 0    | 1.680534 | 2.82E+00  | 22.12024 | 0.113377 | 29.79 |
| 948    | 2016 | 0.9   | 0    | 1.680534 | 2.82E+00  | 21.68809 | 0.015425 | 26.88 |
| 600422 | 2016 | 0.478 | 0    | 1.680534 | 2.82E+00  | 22.41008 | 0.113377 | 29.79 |
| 300142 | 2016 | 1.847 | 0    | 1.680534 | 2.82E+00  | 22.56762 | 0.00852  | 8     |
| 878    | 2016 | 0.453 | 0    | 1.680534 | 2.82E+00  | 23.86082 | 0.026358 | 45.01 |
| 960    | 2016 | -0.07 | 0    | 1.680534 | 2.82E+00  | 24.07054 | 0.027115 | 36.86 |
| 960    | 2016 | -0.35 | 0    | 1.680534 | 2.82E+00  | 24.07054 | 0.027115 | 36.86 |
| 300142 | 2016 | 1.847 | 0    | 1.680534 | 2.82E+00  | 22.56762 | 0.00852  | 8     |
| 600096 | 2016 | -0.22 | 0    | 1.680534 | 2.8241939 | 24.93871 | -0.4336  | 45.94 |
| 878    | 2016 | -0.33 | 0    | 1.680534 | 2.8241939 | 23.86082 | 0.026358 | 45.01 |
| 600096 | 2016 | 0.386 | 0    | 1.680534 | 2.8241939 | 24.93871 | -0.4336  | 45.94 |
| 538    | 2016 | -0.62 | 0    | 1.680534 | 2.8241939 | 23.92547 | 0.18499  | 41.52 |
| 948    | 2016 | 0.966 | 0    | 1.680534 | 2.8241939 | 21.68809 | 0.015425 | 26.88 |
| 807    | 2016 | -0.4  | 0    | 1.680534 | 2.8241939 | 24.18673 | 0.020953 | 42.57 |
| 948    | 2016 | 0.966 | 0    | 1.680534 | 2.8241939 | 21.68809 | 0.015425 | 26.88 |
| 2750   | 2016 | -0.2  | 0    | 1.680534 | 2.8241939 | 20.44841 | 0.13573  | 43.82 |
| 807    | 2016 | 0.646 | 0    | 1.680534 | 2.8241939 | 24.18673 | 0.020953 | 42.57 |
| 600459 | 2016 | 0.603 | 0    | 1.680534 | 2.8241939 | 21.95773 | 0.046403 | 39.34 |
| 300142 | 2016 | 1.847 | 0    | 1.680534 | 2.8241939 | 22.56762 | 0.00852  | 8     |
| 600459 | 2016 | 0.063 | 0    | 1.680534 | 2.8241939 | 21.77218 | 0.046403 | 39.34 |
| 600096 | 2016 | 0.163 | 0    | 1.680534 | 2.8241939 | 24.93871 | -0.4336  | 45.94 |
| 948    | 2016 | 0.966 | 0    | 1.680534 | 2.8241939 | 21.68809 | 0.015425 | 26.88 |
| 600096 | 2016 | -0.2  | 0    | 1.680534 | 2.8241939 | 24.93871 | -0.4336  | 45.94 |
| 960    | 2016 | 0.337 | 0    | 1.680534 | 2.8241939 | 24.07054 | 0.027115 | 36.86 |
| 878    | 2016 | -0.3  | 0    | 1.680534 | 2.8241939 | 23.86082 | 0.026358 | 45.01 |
| 878    | 2016 | -0.04 | 0    | 1.680534 | 2.8241939 | 23.86082 | 0.026358 | 45.01 |
| 960    | 2016 | 0.509 | 0    | 1.680534 | 2.8241939 | 23.94857 | 0.027115 | 36.86 |
| 600096 | 2016 | -0.13 | 0    | 1.680534 | 2.8241939 | 24.04765 | -0.4336  | 45.94 |
| 878    | 2016 | -0.61 | 0    | 1.680534 | 2.8241939 | 23.86082 | 0.026358 | 45.01 |
| 300142 | 2016 | 1.847 | 0    | 1.680534 | 2.8241939 | 22.56762 | 0.00852  | 8     |
| 2265   | 2016 | -0.32 | 0    | 1.680534 | 2.8241939 | 20.48611 | 0.014251 | 48.2  |
| 600096 | 2016 | -0.94 | 0    | 1.680534 | 2.8241939 | 24.93871 | -0.4336  | 45.94 |
| 300142 | 2016 | 1.847 | 0    | 1.680534 | 2.8241939 | 22.56762 | 0.00852  | 8     |
| 600422 | 2016 | 0.478 | 0    | 1.680534 | 2.8241939 | 22.41008 | 0.113377 | 29.79 |
| 300142 | 2016 | 0.841 | 0    | 1.680534 | 2.8241939 | 22.56762 | 0.00852  | 8     |
| 807    | 2016 | -0.68 | 0    | 1.680534 | 2.8241939 | 24.18673 | 0.020953 | 42.57 |
| 600422 | 2016 | -0.48 | 0    | 1.680534 | 2.8241939 | 22.41008 | 0.113377 | 29.79 |

|        |      |       |   |          |           |          |          |       |
|--------|------|-------|---|----------|-----------|----------|----------|-------|
| 878    | 2016 | -0.87 | 0 | 1.680534 | 2.8241939 | 23.86082 | 0.026358 | 45.01 |
| 600422 | 2016 | 0.372 | 0 | 1.680534 | 2.8241939 | 22.41008 | 0.113377 | 29.79 |
| 600459 | 2016 | 0.622 | 0 | 1.680534 | 2.8241939 | 21.95773 | 0.046403 | 39.34 |
| 878    | 2016 | -0.35 | 0 | 1.680534 | 2.8241939 | 23.86082 | 0.026358 | 45.01 |
| 807    | 2016 | -0.12 | 0 | 1.680534 | 2.8241939 | 24.18673 | 0.020953 | 42.57 |
| 2053   | 2016 | -0.79 | 0 | 1.680534 | 2.8241939 | 21.61119 | 0.110325 | 34.57 |
| 538    | 2016 | -0.3  | 0 | 1.680534 | 2.8241939 | 23.92547 | 0.18499  | 41.52 |
| 538    | 2016 | -0.68 | 0 | 1.680534 | 2.8241939 | 23.92547 | 0.18499  | 41.52 |
| 600096 | 2016 | 0.092 | 0 | 1.680534 | 2.8241939 | 24.93871 | -0.4336  | 45.94 |
| 948    | 2016 | 0.966 | 0 | 1.680534 | 2.8241939 | 21.68809 | 0.015425 | 26.88 |
| 2059   | 2016 | -0.21 | 0 | 1.680534 | 2.8241939 | 21.45059 | 0.047763 | 49.52 |
| 600422 | 2016 | 0.372 | 0 | 1.680534 | 2.8241939 | 22.41008 | 0.113377 | 29.79 |
| 2059   | 2016 | -0.21 | 0 | 1.680534 | 2.8241939 | 22.10216 | 0.047763 | 49.52 |
| 600096 | 2016 | -0.94 | 0 | 1.680534 | 2.8241939 | 24.93871 | -0.4336  | 45.94 |
| 2750   | 2016 | -0.2  | 0 | 1.680534 | 2.8241939 | 20.44841 | 0.13573  | 43.82 |
| 538    | 2016 | -0.62 | 0 | 1.680534 | 2.8241939 | 23.92547 | 0.18499  | 41.52 |
| 878    | 2016 | 0.453 | 0 | 1.680534 | 2.8241939 | 23.86082 | 0.026358 | 45.01 |
| 807    | 2016 | -0.17 | 0 | 1.680534 | 2.8241939 | 23.62315 | 0.020953 | 42.57 |
| 807    | 2016 | 0.057 | 0 | 1.680534 | 2.8241939 | 24.18673 | 0.020953 | 42.57 |
| 960    | 2016 | -0.05 | 0 | 1.680534 | 2.8241939 | 24.07054 | 0.027115 | 36.86 |
| 878    | 2016 | -0.87 | 0 | 1.680534 | 2.8241939 | 23.86082 | 0.026358 | 45.01 |
| 538    | 2016 | -0    | 0 | 1.680534 | 2.8241939 | 23.92547 | 0.18499  | 41.52 |
| 300142 | 2016 | 1.847 | 0 | 1.680534 | 2.8241939 | 22.56762 | 0.00852  | 8     |
| 538    | 2016 | 0.343 | 0 | 1.680534 | 2.8241939 | 23.92547 | 0.18499  | 41.52 |
| 600792 | 2016 | -0.72 | 0 | 1.680534 | 2.8241939 | 22.58167 | 0.018685 | 60.19 |
| 878    | 2016 | -0.74 | 0 | 1.680534 | 2.8241939 | 23.86082 | 0.026358 | 45.01 |
| 538    | 2016 | 0.475 | 0 | 1.680534 | 2.8241939 | 23.92547 | 0.18499  | 41.52 |
| 2059   | 2016 | -0.21 | 0 | 1.680534 | 2.8241939 | 22.10216 | 0.047763 | 49.52 |
| 600422 | 2016 | 0.478 | 0 | 1.680534 | 2.8241939 | 22.41008 | 0.113377 | 29.79 |
| 878    | 2016 | 0.453 | 0 | 1.680534 | 2.8241939 | 23.86082 | 0.026358 | 45.01 |
| 903    | 2016 | -0.58 | 0 | 1.680534 | 2.8241939 | 22.88297 | 0.049887 | 31.92 |
| 600459 | 2016 | 0.759 | 0 | 1.680534 | 2.8241939 | 21.95773 | 0.046403 | 39.34 |
| 600422 | 2016 | -0.21 | 0 | 1.680534 | 2.8241939 | 22.41008 | 0.113377 | 29.79 |
| 948    | 2016 | 0.93  | 0 | 1.680534 | 2.8241939 | 21.68809 | 0.015425 | 26.88 |
| 600792 | 2016 | -0.82 | 0 | 1.680534 | 2.8241939 | 22.51081 | 0.018685 | 60.19 |
| 300142 | 2016 | 1.847 | 0 | 1.680534 | 2.8241939 | 22.56762 | 0.00852  | 8     |
| 2053   | 2016 | 0.34  | 0 | 1.680534 | 2.8241939 | 21.61119 | 0.110325 | 34.57 |
| 600459 | 2016 | 0.515 | 0 | 1.680534 | 2.8241939 | 21.95773 | 0.046403 | 39.34 |
| 903    | 2016 | -0.57 | 0 | 1.680534 | 2.8241939 | 22.88297 | 0.049887 | 31.92 |
| 903    | 2016 | -0.68 | 0 | 1.680534 | 2.8241939 | 22.88297 | 0.049887 | 31.92 |
| 600422 | 2016 | -0.77 | 0 | 1.680534 | 2.8241939 | 22.41008 | 0.113377 | 29.79 |
| 2265   | 2016 | -0.32 | 0 | 1.680534 | 2.8241939 | 20.48611 | 0.014251 | 48.2  |
| 903    | 2016 | -0.57 | 0 | 1.680534 | 2.8241939 | 22.88297 | 0.049887 | 31.92 |
| 2265   | 2016 | -0.32 | 0 | 1.680534 | 2.8241939 | 20.48175 | 0.014251 | 48.2  |
| 878    | 2016 | 0.453 | 0 | 1.680534 | 2.8241939 | 23.86082 | 0.026358 | 45.01 |
| 960    | 2016 | -0.09 | 0 | 1.680534 | 2.8241939 | 24.07054 | 0.027115 | 36.86 |
| 960    | 2016 | -0.82 | 0 | 1.680534 | 2.8241939 | 24.07054 | 0.027115 | 36.86 |
| 960    | 2016 | 0.337 | 0 | 1.680534 | 2.8241939 | 24.07054 | 0.027115 | 36.86 |
| 960    | 2016 | -0.3  | 0 | 1.680534 | 2.8241939 | 24.07054 | 0.027115 | 36.86 |
| 807    | 2016 | -0.68 | 0 | 1.680534 | 2.8241939 | 24.18673 | 0.020953 | 42.57 |
| 948    | 2016 | 0.966 | 0 | 1.680534 | 2.8241939 | 21.68809 | 0.015425 | 26.88 |
| 903    | 2016 | -0.68 | 0 | 1.680534 | 2.8241939 | 22.84756 | 0.049887 | 31.92 |
| 948    | 2016 | 0.966 | 0 | 1.680534 | 2.8241939 | 21.68809 | 0.015425 | 26.88 |
| 600792 | 2016 | -0.82 | 0 | 1.680534 | 2.8241939 | 22.58167 | 0.018685 | 60.19 |

|        |      |       |      |          |           |          |          |       |
|--------|------|-------|------|----------|-----------|----------|----------|-------|
| 600422 | 2016 | -0.46 | 0    | 1.680534 | 2.8241939 | 22.41008 | 0.113377 | 29.79 |
| 2053   | 2016 | -0.84 | 0    | 1.680534 | 2.8241939 | 21.90842 | 0.110325 | 34.57 |
| 960    | 2016 | -0.5  | 0    | 1.680534 | 2.8241939 | 24.07054 | 0.027115 | 36.86 |
| 600096 | 2016 | 0.054 | 0    | 1.680534 | 2.8241939 | 24.93871 | -0.4336  | 45.94 |
| 878    | 2016 | -0.04 | 0    | 1.680534 | 2.8241939 | 23.86082 | 0.026358 | 45.01 |
| 807    | 2016 | -0.21 | 0    | 1.680534 | 2.8241939 | 24.18673 | 0.020953 | 42.57 |
| 948    | 2016 | 0.9   | 0    | 1.680534 | 2.8241939 | 21.61054 | 0.015425 | 26.88 |
| 600459 | 2016 | 0.646 | 0    | 1.680534 | 2.8241939 | 21.95773 | 0.046403 | 39.34 |
| 538    | 2016 | -0.3  | 0    | 1.680534 | 2.8241939 | 23.92547 | 0.18499  | 41.52 |
| 600422 | 2016 | -0.08 | 0    | 1.680534 | 2.8241939 | 22.41008 | 0.113377 | 29.79 |
| 300142 | 2016 | 1.847 | 0    | 1.680534 | 2.8241939 | 22.56762 | 0.00852  | 8     |
| 878    | 2016 | 0.453 | 0    | 1.680534 | 2.8241939 | 23.86082 | 0.026358 | 45.01 |
| 807    | 2016 | 0.149 | 0    | 1.680534 | 2.8241939 | 24.18673 | 0.020953 | 42.57 |
| 600792 | 2016 | -0.72 | 0    | 1.680534 | 2.8241939 | 22.58167 | 0.018685 | 60.19 |
| 948    | 2016 | 0.966 | 0    | 1.680534 | 2.8241939 | 21.68809 | 0.015425 | 26.88 |
| 300142 | 2016 | 1.624 | 0    | 1.680534 | 2.8241939 | 22.56762 | 0.00852  | 8     |
| 2053   | 2016 | -0.79 | 0    | 1.680534 | 2.8241939 | 21.90842 | 0.110325 | 34.57 |
| 600422 | 2016 | -0.58 | 0    | 1.680534 | 2.8241939 | 22.41008 | 0.113377 | 29.79 |
| 807    | 2016 | 0.646 | 0    | 1.680534 | 2.8241939 | 24.18673 | 0.020953 | 42.57 |
| 600096 | 2016 | 0.386 | 0    | 1.680534 | 2.8241939 | 24.93871 | -0.4336  | 45.94 |
| 600792 | 2016 | -0.82 | 0    | 1.680534 | 2.8241939 | 22.58167 | 0.018685 | 60.19 |
| 2750   | 2016 | 1.122 | 0    | 1.680534 | 2.8241939 | 20.44841 | 0.13573  | 43.82 |
| 538    | 2016 | -0.3  | 0    | 1.680534 | 2.8241939 | 23.92547 | 0.18499  | 41.52 |
| 600096 | 2016 | 0.092 | 0    | 1.680534 | 2.8241939 | 24.93871 | -0.4336  | 45.94 |
| 600459 | 2016 | 0.759 | 0    | 1.680534 | 2.8241939 | 21.95773 | 0.046403 | 39.34 |
| 300142 | 2016 | 0.841 | 0    | 1.680534 | 2.8241939 | 22.24986 | 0.00852  | 8     |
| 600422 | 2016 | 0.478 | 0    | 1.680534 | 2.8241939 | 22.41008 | 0.113377 | 29.79 |
| 2750   | 2016 | 0.857 | 0    | 1.680534 | 2.8241939 | 20.44841 | 0.13573  | 43.82 |
| 948    | 2016 | 0.569 | 0    | 1.680534 | 2.8241939 | 21.68809 | 0.015425 | 26.88 |
| 600096 | 2016 | -0.94 | 0    | 1.680534 | 2.8241939 | 24.93871 | -0.4336  | 45.94 |
| 2750   | 2016 | 1.122 | 0    | 1.680534 | 2.8241939 | 20.44841 | 0.13573  | 43.82 |
| 960    | 2016 | -0.16 | 0    | 1.680534 | 2.8241939 | 24.07054 | 0.027115 | 36.86 |
| 600792 | 2016 | -0.72 | 0    | 1.680534 | 2.8241939 | 22.58167 | 0.018685 | 60.19 |
| 600123 | 2016 | -0.85 | 0    | 1.075853 | 1.1574588 | 23.68644 | -0.09235 | 45.11 |
| 600123 | 2016 | -0.85 | 0    | 1.075853 | 1.1574588 | 23.90552 | -0.09235 | 45.11 |
| 600123 | 2016 | -0.85 | 0    | 1.075853 | 1.1574588 | 23.90552 | -0.09235 | 45.11 |
| 404    | 2016 | -0.36 | 0.02 | 1.602814 | 2.5690115 | 22.81544 | 0.12177  | 28.81 |
| 404    | 2016 | -0.33 | 0.02 | 1.602814 | 2.5690115 | 22.81544 | 0.12177  | 28.81 |
| 2068   | 2016 | 0.106 | 0.02 | 1.602814 | 2.5690115 | 22.5445  | 0.046655 | 43.59 |
| 2068   | 2016 | -0.56 | 0.02 | 1.602814 | 2.5690115 | 22.5445  | 0.046655 | 43.59 |
| 2068   | 2016 | -0.44 | 0.02 | 1.602814 | 2.5690115 | 22.5445  | 0.046655 | 43.59 |
| 404    | 2016 | -0.67 | 0.02 | 1.602814 | 2.5690115 | 22.06529 | 0.12177  | 28.81 |
| 404    | 2016 | -0.67 | 0.02 | 1.602814 | 2.5690115 | 22.81544 | 0.12177  | 28.81 |
| 404    | 2016 | -0.44 | 0.02 | 1.602814 | 2.5690115 | 22.81544 | 0.12177  | 28.81 |
| 300497 | 2016 | 0.726 | 0.02 | 1.602814 | 2.5690115 | 20.94141 | 0.220004 | 33.87 |
| 300497 | 2016 | 0.726 | 0.02 | 1.602814 | 2.5690115 | 21.05857 | 0.220004 | 33.87 |
| 404    | 2016 | -0.67 | 0.02 | 1.602814 | 2.5690115 | 22.81544 | 0.12177  | 28.81 |
| 300497 | 2016 | -0.48 | 0.02 | 1.602814 | 2.5690115 | 21.05857 | 0.220004 | 33.87 |
| 2068   | 2016 | -0.39 | 0.02 | 1.602814 | 2.5690115 | 22.5445  | 0.046655 | 43.59 |
| 300497 | 2016 | -0.1  | 0.02 | 1.602814 | 2.5690115 | 21.05857 | 0.220004 | 33.87 |
| 404    | 2016 | -0.67 | 0.02 | 1.602814 | 2.5690115 | 22.81544 | 0.12177  | 28.81 |
| 2068   | 2016 | -0.56 | 0.02 | 1.602814 | 2.5690115 | 22.5445  | 0.046655 | 43.59 |
| 2068   | 2016 | -0.56 | 0.02 | 1.602814 | 2.5690115 | 22.5445  | 0.046655 | 43.59 |
| 2068   | 2016 | -0.56 | 0.02 | 1.602814 | 2.5690115 | 22.5445  | 0.046655 | 43.59 |

|        |      |       |      |          |            |          |          |       |
|--------|------|-------|------|----------|------------|----------|----------|-------|
| 404    | 2016 | -0.67 | 0.02 | 1.602814 | 2.5690115  | 22.81544 | 0.12177  | 28.81 |
| 2068   | 2016 | -0.23 | 0.02 | 1.602814 | 2.5690115  | 22.5445  | 0.046655 | 43.59 |
| 300497 | 2016 | -0.48 | 0.02 | 1.602814 | 2.5690115  | 21.05857 | 0.220004 | 33.87 |
| 2068   | 2016 | -0.43 | 0.02 | 1.602814 | 2.5690115  | 22.26247 | 0.046655 | 43.59 |
| 2068   | 2016 | -0.56 | 0.02 | 1.602814 | 2.5690115  | 22.5445  | 0.046655 | 43.59 |
| 2068   | 2016 | -0.56 | 0.02 | 1.602814 | 2.5690115  | 22.5445  | 0.046655 | 43.59 |
| 600497 | 2016 | -0.27 | 0    | 1.27039  | 1.6138918  | 24.21466 | -0.14806 | 38.49 |
| 600497 | 2016 | -0.81 | 0    | 1.27039  | 1.6138918  | 24.21466 | -0.14806 | 38.49 |
| 600497 | 2016 | -0.2  | 0    | 1.27039  | 1.6138918  | 24.21466 | -0.14806 | 38.49 |
| 600497 | 2016 | -0.08 | 0    | 1.27039  | 1.6138918  | 24.21466 | -0.14806 | 38.49 |
| 600497 | 2016 | -0.39 | 0    | 1.27039  | 1.6138918  | 23.919   | -0.14806 | 38.49 |
| 600497 | 2016 | 0.511 | 0    | 1.27039  | 1.6138918  | 24.21466 | -0.14806 | 38.49 |
| 600497 | 2016 | -0.39 | 0    | 1.27039  | 1.6138918  | 24.21466 | -0.14806 | 38.49 |
| 600497 | 2016 | 0.511 | 0    | 1.27039  | 1.6138918  | 24.21466 | -0.14806 | 38.49 |
| 600497 | 2016 | -0.21 | 0    | 1.27039  | 1.6138918  | 24.21466 | -0.14806 | 38.49 |
| 600497 | 2016 | -0.15 | 0    | 1.27039  | 1.6138918  | 24.21466 | -0.14806 | 38.49 |
| 600497 | 2016 | -0.39 | 0    | 1.27039  | 1.6138918  | 24.21466 | -0.14806 | 38.49 |
| 2114   | 2016 | -0.64 | 0    | 1.27039  | 1.6138918  | 21.361   | 0.089866 | 32.59 |
| 2114   | 2016 | -0.64 | 0    | 1.27039  | 1.6138918  | 21.29229 | 0.089866 | 32.59 |
| 2114   | 2016 | -0.64 | 0    | 1.27039  | 1.6138918  | 21.361   | 0.089866 | 32.59 |
| 600497 | 2016 | 0.109 | 0    | 1.27039  | 1.6138918  | 24.21466 | -0.14806 | 38.49 |
| 600497 | 2016 | -0.81 | 0    | 1.27039  | 1.6138918  | 24.21466 | -0.14806 | 38.49 |
| 600497 | 2016 | -0.31 | 0    | 1.27039  | 1.6138918  | 24.21466 | -0.14806 | 38.49 |
| 761    | 2016 | -0.11 | 0    | 1.658431 | 2.7503937  | 24.71591 | 0.062037 | 74.18 |
| 761    | 2016 | -0.11 | 0    | 1.658431 | 2.7503937  | 24.65008 | 0.062037 | 74.18 |
| 761    | 2016 | -0.11 | 0    | 1.658431 | 2.7503937  | 24.71591 | 0.062037 | 74.18 |
| 761    | 2016 | -0.16 | 0    | 1.658431 | 2.7503937  | 24.71591 | 0.062037 | 74.18 |
| 761    | 2016 | -0.16 | 0    | 1.658431 | 2.7503937  | 24.71591 | 0.062037 | 74.18 |
| 300144 | 2016 | 0.681 | 0.04 | 0.050103 | 0.00251027 | 22.74711 | 0.139674 | 29.48 |
| 2444   | 2016 | -0.3  | 0.04 | 0.050103 | 0.00251027 | 22.68234 | 0.110077 | 44.54 |
| 2444   | 2016 | -0.63 | 0.04 | 0.050103 | 0.00251027 | 22.68234 | 0.110077 | 44.54 |
| 2444   | 2016 | -0.37 | 0.04 | 0.050103 | 0.00251027 | 22.68234 | 0.110077 | 44.54 |
| 2115   | 2016 | 0.964 | 0.04 | 0.050103 | 0.00251027 | 21.5045  | 0.025444 | 19.09 |
| 925    | 2016 | -0.25 | 0.04 | 0.050103 | 0.00251027 | 22.11251 | -0.11709 | 16.66 |
| 2444   | 2016 | -0.44 | 0.04 | 0.050103 | 0.00251027 | 22.68234 | 0.110077 | 44.54 |
| 2019   | 2016 | 0.465 | 0.04 | 0.050103 | 0.00251027 | 22.66682 | 0.175205 | 47.35 |
| 2444   | 2016 | -0.33 | 0.04 | 0.050103 | 0.00251027 | 22.68234 | 0.110077 | 44.54 |
| 300306 | 2016 | 0.555 | 0.04 | 0.050103 | 0.00251027 | 21.55324 | 0.046994 | 27.85 |
| 2444   | 2016 | -0.19 | 0.04 | 0.050103 | 0.00251027 | 22.68234 | 0.110077 | 44.54 |
| 600776 | 2016 | -0.03 | 0.04 | 0.050103 | 0.00251027 | 22.07044 | 0.030561 | 45.44 |
| 300250 | 2016 | 1.02  | 0.04 | 0.050103 | 0.00251027 | 21.32215 | 0.082983 | 42.73 |
| 300078 | 2016 | 0.219 | 0.04 | 0.050103 | 0.00251027 | 21.80702 | 0.091571 | 19.49 |
| 2430   | 2016 | -0.31 | 0.04 | 0.050103 | 0.00251027 | 23.01718 | -0.07522 | 61.49 |
| 600987 | 2016 | -0.73 | 0.04 | 0.050103 | 0.00251027 | 22.17808 | 0.179881 | 32.9  |
| 300347 | 2016 | 0.329 | 0.04 | 0.050103 | 0.00251027 | 21.59386 | 0.085217 | 28.24 |
| 300145 | 2016 | -0.42 | 0.04 | 0.050103 | 0.00251027 | 22.71182 | 0.12474  | 26.16 |
| 600126 | 2016 | -0.42 | 0.04 | 0.050103 | 0.00251027 | 23.4011  | 0.049133 | 44.69 |
| 559    | 2016 | -0.61 | 0.04 | 0.050103 | 0.00251027 | 23.16715 | 0.188514 | 51.53 |
| 2284   | 2016 | -0.28 | 0.04 | 0.050103 | 0.00251027 | 22.31617 | 0.055966 | 38.82 |
| 600776 | 2016 | 0.336 | 0.04 | 0.050103 | 0.00251027 | 22.07044 | 0.030561 | 45.44 |
| 300145 | 2016 | -0.17 | 0.04 | 0.050103 | 0.00251027 | 22.71182 | 0.12474  | 26.16 |
| 2479   | 2016 | -0.18 | 0.04 | 0.050103 | 0.00251027 | 22.36228 | 0.096004 | 38    |
| 600460 | 2016 | 0.64  | 0.04 | 0.050103 | 0.00251027 | 22.35011 | 0.029617 | 41.17 |
| 2236   | 2016 | 0.955 | 0.04 | 0.050103 | 0.00251027 | 23.45545 | 0.214835 | 41.26 |

|        |      |       |      |          |            |          |          |       |
|--------|------|-------|------|----------|------------|----------|----------|-------|
| 600987 | 2016 | -0.73 | 0.04 | 0.050103 | 0.00251027 | 22.17808 | 0.179881 | 32.9  |
| 300020 | 2016 | -0.19 | 0.04 | 0.050103 | 0.00251027 | 22.46588 | 0.046312 | 24.34 |
| 2415   | 2016 | 0.717 | 0.04 | 0.050103 | 0.00251027 | 24.44507 | 0.302158 | 39.91 |
| 2418   | 2016 | -0.51 | 0.04 | 0.050103 | 0.00251027 | 21.94461 | 0.099706 | 15.58 |
| 600570 | 2016 | 2.603 | 0.04 | 0.050103 | 0.00251027 | 22.23806 | -0.02075 | 20.72 |
| 300113 | 2016 | 1.416 | 0.04 | 0.050103 | 0.00251027 | 21.9506  | 0.23779  | 42.49 |
| 600763 | 2016 | -0.55 | 0.04 | 0.050103 | 0.00251027 | 20.97484 | 0.147826 | 33.75 |
| 2115   | 2016 | 0.964 | 0.04 | 0.050103 | 0.00251027 | 21.68229 | 0.025444 | 19.09 |
| 2430   | 2016 | 0.082 | 0.04 | 0.050103 | 0.00251027 | 23.01718 | -0.07522 | 61.49 |
| 909    | 2016 | 0.467 | 0.04 | 0.050103 | 0.00251027 | 22.26318 | 0.030931 | 47.7  |
| 2276   | 2016 | 0.26  | 0.04 | 0.050103 | 0.00251027 | 22.33908 | 0.067735 | 39.83 |
| 909    | 2016 | 0.538 | 0.04 | 0.050103 | 0.00251027 | 22.26318 | 0.030931 | 47.7  |
| 2266   | 2016 | 0.822 | 0.04 | 0.050103 | 0.00251027 | 22.6291  | 0.035591 | 20.22 |
| 2280   | 2016 | 1.447 | 0.04 | 0.050103 | 0.00251027 | 22.82209 | 0.056506 | 22.42 |
| 300145 | 2016 | -0.24 | 0.04 | 0.050103 | 0.00251027 | 22.71182 | 0.12474  | 26.16 |
| 300203 | 2016 | 0.153 | 0.04 | 0.050103 | 0.00251027 | 22.41213 | 0.148133 | 24.62 |
| 2415   | 2016 | 0.297 | 0.04 | 0.050103 | 0.00251027 | 24.1193  | 0.302158 | 39.91 |
| 603806 | 2016 | 0.567 | 0.04 | 0.050103 | 0.00251027 | 22.42738 | 0.175104 | 56.29 |
| 600126 | 2016 | -0.44 | 0.04 | 0.050103 | 0.00251027 | 23.96435 | 0.049133 | 44.69 |
| 2276   | 2016 | -0.61 | 0.04 | 0.050103 | 0.00251027 | 22.33908 | 0.067735 | 39.83 |
| 2493   | 2016 | 0.359 | 0.04 | 0.050103 | 0.00251027 | 24.42805 | 0.132412 | 70.36 |
| 300266 | 2016 | -0.05 | 0.04 | 0.050103 | 0.00251027 | 22.51982 | 0.062597 | 35.22 |
| 2284   | 2016 | -0.58 | 0.04 | 0.050103 | 0.00251027 | 22.31617 | 0.055966 | 38.82 |
| 300270 | 2016 | 0.83  | 0.04 | 0.050103 | 0.00251027 | 20.61884 | 0.068267 | 57.5  |
| 300244 | 2016 | -0.69 | 0.04 | 0.050103 | 0.00251027 | 22.4668  | 0.132742 | 39.6  |
| 600987 | 2016 | -0.73 | 0.04 | 0.050103 | 0.00251027 | 22.17808 | 0.179881 | 32.9  |
| 300459 | 2016 | -0.44 | 0.04 | 0.050103 | 0.00251027 | 22.40255 | 0.043774 | 18.09 |
| 300250 | 2016 | 1.461 | 0.04 | 0.050103 | 0.00251027 | 21.32215 | 0.082983 | 42.73 |
| 300025 | 2016 | -0.41 | 0.04 | 0.050103 | 0.00251027 | 21.84055 | 0.078024 | 11.71 |
| 2493   | 2016 | 0.359 | 0.04 | 0.050103 | 0.00251027 | 23.30881 | 0.132412 | 70.36 |
| 2010   | 2016 | 0.709 | 0.04 | 0.050103 | 0.00251027 | 23.56296 | 0.06479  | 60.56 |
| 600477 | 2016 | -0.21 | 0.04 | 0.050103 | 0.00251027 | 22.55986 | 0.192861 | 43.65 |
| 2430   | 2016 | -0.13 | 0.04 | 0.050103 | 0.00251027 | 23.01718 | -0.07522 | 61.49 |
| 2010   | 2016 | 0.709 | 0.04 | 0.050103 | 0.00251027 | 23.52122 | 0.06479  | 60.56 |
| 2280   | 2016 | 0.564 | 0.04 | 0.050103 | 0.00251027 | 22.82209 | 0.056506 | 22.42 |
| 2284   | 2016 | -0.58 | 0.04 | 0.050103 | 0.00251027 | 22.31617 | 0.055966 | 38.82 |
| 2010   | 2016 | 0.537 | 0.04 | 0.050103 | 0.00251027 | 23.56296 | 0.06479  | 60.56 |
| 300270 | 2016 | 0.83  | 0.04 | 0.050103 | 0.00251027 | 20.62934 | 0.068267 | 57.5  |
| 559    | 2016 | 0.255 | 0.04 | 0.050103 | 0.00251027 | 23.16715 | 0.188514 | 51.53 |
| 300020 | 2016 | 0.748 | 0.04 | 0.050103 | 0.00251027 | 22.46588 | 0.046312 | 24.34 |
| 2552   | 2016 | -0.03 | 0.04 | 0.050103 | 0.00251027 | 20.86564 | -0.23309 | 32.83 |
| 2488   | 2016 | -0.3  | 0.04 | 0.050103 | 0.00251027 | 22.20393 | -0.0975  | 16.59 |
| 2019   | 2016 | 0.995 | 0.04 | 0.050103 | 0.00251027 | 22.66682 | 0.175205 | 47.35 |
| 600460 | 2016 | -0.02 | 0.04 | 0.050103 | 0.00251027 | 22.35011 | 0.029617 | 41.17 |
| 300300 | 2016 | 0.419 | 0.04 | 0.050103 | 0.00251027 | 21.98159 | 0.018031 | 47.73 |
| 300068 | 2016 | 0.147 | 0.04 | 0.050103 | 0.00251027 | 22.94131 | 0.075163 | 15.12 |
| 600571 | 2016 | 0.925 | 0.04 | 0.050103 | 0.00251027 | 20.96703 | 0.114829 | 19.58 |
| 2444   | 2016 | 0.084 | 0.04 | 0.050103 | 0.00251027 | 22.68234 | 0.110077 | 44.54 |
| 600797 | 2016 | -0.36 | 0.04 | 0.050103 | 0.00251027 | 22.12461 | 0.113565 | 19.65 |
| 300347 | 2016 | 0.219 | 0.04 | 0.050103 | 0.00251027 | 21.59386 | 0.085217 | 28.24 |
| 300300 | 2016 | 0.419 | 0.04 | 0.050103 | 0.00251027 | 21.98159 | 0.018031 | 47.73 |
| 156    | 2016 | 0.102 | 0.04 | 0.050103 | 0.00251027 | 23.36467 | 0.059385 | 41.85 |
| 2276   | 2016 | 0.26  | 0.04 | 0.050103 | 0.00251027 | 22.02303 | 0.067735 | 39.83 |
| 300270 | 2016 | 0.83  | 0.04 | 0.050103 | 0.00251027 | 20.61884 | 0.068267 | 57.5  |

|        |      |       |      |          |            |          |          |       |
|--------|------|-------|------|----------|------------|----------|----------|-------|
| 2415   | 2016 | 0.543 | 0.04 | 0.050103 | 0.00251027 | 24.44507 | 0.302158 | 39.91 |
| 2247   | 2016 | -0.68 | 0.04 | 0.050103 | 0.00251027 | 22.3302  | 0.082856 | 15.32 |
| 300203 | 2016 | 0.049 | 0.04 | 0.050103 | 0.00251027 | 22.41213 | 0.148133 | 24.62 |
| 2280   | 2016 | 0.784 | 0.04 | 0.050103 | 0.00251027 | 22.82209 | 0.056506 | 22.42 |
| 2444   | 2016 | 0.084 | 0.04 | 0.050103 | 0.00251027 | 22.68234 | 0.110077 | 44.54 |
| 2095   | 2016 | 1.066 | 0.04 | 0.050103 | 0.00251027 | 20.1144  | 0.011364 | 48.75 |
| 2135   | 2016 | -0.5  | 0.04 | 0.050103 | 0.00251027 | 22.87491 | 0.02191  | 36.81 |
| 300020 | 2016 | -0.19 | 0.04 | 0.050103 | 0.00251027 | 22.46588 | 0.046312 | 24.34 |
| 925    | 2016 | -0.25 | 0.04 | 0.050103 | 0.00251027 | 22.11251 | -0.11709 | 16.66 |
| 600677 | 2016 | 0.042 | 0.04 | 0.050103 | 0.00251027 | 22.24999 | -0.4336  | 19.2  |
| 559    | 2016 | -0.36 | 0.04 | 0.050103 | 0.00251027 | 23.16715 | 0.188514 | 51.53 |
| 300250 | 2016 | 1.02  | 0.04 | 0.050103 | 0.00251027 | 21.32215 | 0.082983 | 42.73 |
| 2276   | 2016 | -0.24 | 0.04 | 0.050103 | 0.00251027 | 22.33908 | 0.067735 | 39.83 |
| 600677 | 2016 | 0.355 | 0.04 | 0.050103 | 0.00251027 | 23.16425 | -0.4336  | 19.2  |
| 2135   | 2016 | -0.21 | 0.04 | 0.050103 | 0.00251027 | 22.6538  | 0.02191  | 36.81 |
| 909    | 2016 | 0.467 | 0.04 | 0.050103 | 0.00251027 | 22.26318 | 0.030931 | 47.7  |
| 603901 | 2016 | -0.37 | 0.04 | 0.050103 | 0.00251027 | 21.23864 | 0.097484 | 42.9  |
| 2767   | 2016 | -0.29 | 0.04 | 0.050103 | 0.00251027 | 20.46189 | 0.06803  | 49.06 |
| 2479   | 2016 | -0.13 | 0.04 | 0.050103 | 0.00251027 | 21.95607 | 0.096004 | 38    |
| 559    | 2016 | 0.038 | 0.04 | 0.050103 | 0.00251027 | 23.16715 | 0.188514 | 51.53 |
| 2236   | 2016 | 0.724 | 0.04 | 0.050103 | 0.00251027 | 23.45545 | 0.214835 | 41.26 |
| 2430   | 2016 | -0.41 | 0.04 | 0.050103 | 0.00251027 | 23.01718 | -0.07522 | 61.49 |
| 300145 | 2016 | -0.02 | 0.04 | 0.050103 | 0.00251027 | 22.71182 | 0.12474  | 26.16 |
| 2430   | 2016 | -0.32 | 0.04 | 0.050103 | 0.00251027 | 23.01718 | -0.07522 | 61.49 |
| 300145 | 2016 | -0.21 | 0.04 | 0.050103 | 0.00251027 | 22.71182 | 0.12474  | 26.16 |
| 2430   | 2016 | -0.58 | 0.04 | 0.050103 | 0.00251027 | 23.01718 | -0.07522 | 61.49 |
| 300068 | 2016 | -0.39 | 0.04 | 0.050103 | 0.00251027 | 22.94131 | 0.075163 | 15.12 |
| 2493   | 2016 | 0.359 | 0.04 | 0.050103 | 0.00251027 | 24.42805 | 0.132412 | 70.36 |
| 2019   | 2016 | -0.07 | 0.04 | 0.050103 | 0.00251027 | 22.66682 | 0.175205 | 47.35 |
| 600677 | 2016 | -0.16 | 0.04 | 0.050103 | 0.00251027 | 23.16425 | -0.4336  | 19.2  |
| 2019   | 2016 | 0.995 | 0.04 | 0.050103 | 0.00251027 | 22.66682 | 0.175205 | 47.35 |
| 300300 | 2016 | 0.419 | 0.04 | 0.050103 | 0.00251027 | 21.98159 | 0.018031 | 47.73 |
| 603558 | 2016 | -0.86 | 0.04 | 0.050103 | 0.00251027 | 21.62208 | 0.05631  | 43.72 |
| 2418   | 2016 | -0.6  | 0.04 | 0.050103 | 0.00251027 | 22.71208 | 0.099706 | 15.58 |
| 300113 | 2016 | 1.673 | 0.04 | 0.050103 | 0.00251027 | 21.9506  | 0.23779  | 42.49 |
| 2122   | 2016 | -0.34 | 0.04 | 0.050103 | 0.00251027 | 22.61764 | -0.05504 | 29.97 |
| 600797 | 2016 | 0.101 | 0.04 | 0.050103 | 0.00251027 | 22.12461 | 0.113565 | 19.65 |
| 300300 | 2016 | 0.419 | 0.04 | 0.050103 | 0.00251027 | 21.9283  | 0.018031 | 47.73 |
| 2488   | 2016 | -0.3  | 0.04 | 0.050103 | 0.00251027 | 22.16821 | -0.0975  | 16.59 |
| 300250 | 2016 | 1.02  | 0.04 | 0.050103 | 0.00251027 | 21.32215 | 0.082983 | 42.73 |
| 300203 | 2016 | 0.2   | 0.04 | 0.050103 | 0.00251027 | 22.41213 | 0.148133 | 24.62 |
| 2415   | 2016 | 0.543 | 0.04 | 0.050103 | 0.00251027 | 24.44507 | 0.302158 | 39.91 |
| 600596 | 2016 | 0.275 | 0.04 | 0.050103 | 0.00251027 | 22.80202 | 0.019666 | 14.98 |
| 2214   | 2016 | 2.228 | 0.04 | 0.050103 | 0.00251027 | 20.94618 | 0.033598 | 29.1  |
| 600797 | 2016 | 0.724 | 0.04 | 0.050103 | 0.00251027 | 22.12461 | 0.113565 | 19.65 |
| 300203 | 2016 | 0.295 | 0.04 | 0.050103 | 0.00251027 | 22.41213 | 0.148133 | 24.62 |
| 600677 | 2016 | -0.22 | 0.04 | 0.050103 | 0.00251027 | 23.16425 | -0.4336  | 19.2  |
| 2415   | 2016 | 0.62  | 0.04 | 0.050103 | 0.00251027 | 24.44507 | 0.302158 | 39.91 |
| 2019   | 2016 | 0.995 | 0.04 | 0.050103 | 0.00251027 | 22.66682 | 0.175205 | 47.35 |
| 300203 | 2016 | -0.29 | 0.04 | 0.050103 | 0.00251027 | 22.41213 | 0.148133 | 24.62 |
| 300306 | 2016 | 1.35  | 0.04 | 0.050103 | 0.00251027 | 21.5039  | 0.046994 | 27.85 |
| 2276   | 2016 | -0.24 | 0.04 | 0.050103 | 0.00251027 | 22.33908 | 0.067735 | 39.83 |
| 2488   | 2016 | -0.3  | 0.04 | 0.050103 | 0.00251027 | 22.16821 | -0.0975  | 16.59 |
| 601177 | 2016 | 0.008 | 0.04 | 0.050103 | 0.00251027 | 21.96284 | 0.010954 | 45.01 |



|        |      |       |      |          |            |          |          |       |
|--------|------|-------|------|----------|------------|----------|----------|-------|
| 2479   | 2016 | -0.18 | 0.04 | 0.050103 | 0.00251027 | 22.36228 | 0.096004 | 38    |
| 600571 | 2016 | 0.925 | 0.04 | 0.050103 | 0.00251027 | 21.2641  | 0.114829 | 19.58 |
| 300145 | 2016 | -0.21 | 0.04 | 0.050103 | 0.00251027 | 22.71182 | 0.12474  | 26.16 |
| 2115   | 2016 | -0.25 | 0.04 | 0.050103 | 0.00251027 | 21.68229 | 0.025444 | 19.09 |
| 600126 | 2016 | -0.42 | 0.04 | 0.050103 | 0.00251027 | 23.96435 | 0.049133 | 44.69 |
| 601177 | 2016 | 0.008 | 0.04 | 0.050103 | 0.00251027 | 22.07183 | 0.010954 | 45.01 |
| 300020 | 2016 | 1.139 | 0.04 | 0.050103 | 0.00251027 | 22.46588 | 0.046312 | 24.34 |
| 300203 | 2016 | 0.374 | 0.04 | 0.050103 | 0.00251027 | 22.41213 | 0.148133 | 24.62 |
| 603806 | 2016 | -0.14 | 0.04 | 0.050103 | 0.00251027 | 22.42738 | 0.175104 | 56.29 |
| 607    | 2016 | 0.404 | 0.04 | 0.050103 | 0.00251027 | 21.81178 | 0.142806 | 48.13 |
| 2364   | 2016 | 0.463 | 0.04 | 0.050103 | 0.00251027 | 21.69928 | 0.067723 | 35.56 |
| 2236   | 2016 | 1.132 | 0.04 | 0.050103 | 0.00251027 | 23.45545 | 0.214835 | 41.26 |
| 2637   | 2016 | -0    | 0.04 | 0.050103 | 0.00251027 | 22.3039  | 0.075465 | 16.79 |
| 300306 | 2016 | 0.516 | 0.04 | 0.050103 | 0.00251027 | 21.55324 | 0.046994 | 27.85 |
| 300266 | 2016 | 0.017 | 0.04 | 0.050103 | 0.00251027 | 22.51982 | 0.062597 | 35.22 |
| 2280   | 2016 | 1.447 | 0.04 | 0.050103 | 0.00251027 | 22.82209 | 0.056506 | 22.42 |
| 607    | 2016 | 0.404 | 0.04 | 0.050103 | 0.00251027 | 21.81178 | 0.142806 | 48.13 |
| 300266 | 2016 | -0.05 | 0.04 | 0.050103 | 0.00251027 | 22.51982 | 0.062597 | 35.22 |
| 300459 | 2016 | -0.44 | 0.04 | 0.050103 | 0.00251027 | 22.30774 | 0.043774 | 18.09 |
| 300145 | 2016 | -0.24 | 0.04 | 0.050103 | 0.00251027 | 22.48064 | 0.12474  | 26.16 |
| 600571 | 2016 | 1.028 | 0.04 | 0.050103 | 0.00251027 | 21.2641  | 0.114829 | 19.58 |
| 300020 | 2016 | -0.19 | 0.04 | 0.050103 | 0.00251027 | 22.46588 | 0.046312 | 24.34 |
| 300250 | 2016 | 1.02  | 0.04 | 0.050103 | 0.00251027 | 21.32215 | 0.082983 | 42.73 |
| 2247   | 2016 | -0.68 | 0.04 | 0.050103 | 0.00251027 | 22.3302  | 0.082856 | 15.32 |
| 2364   | 2016 | -0.08 | 0.04 | 0.050103 | 0.00251027 | 21.69928 | 0.067723 | 35.56 |
| 607    | 2016 | 0.404 | 0.04 | 0.050103 | 0.00251027 | 21.81178 | 0.142806 | 48.13 |
| 600797 | 2016 | 0.724 | 0.04 | 0.050103 | 0.00251027 | 22.12461 | 0.113565 | 19.65 |
| 2637   | 2016 | 0.076 | 0.04 | 0.050103 | 0.00251027 | 22.3039  | 0.075465 | 16.79 |
| 2430   | 2016 | 0.337 | 0.04 | 0.050103 | 0.00251027 | 23.01718 | -0.07522 | 61.49 |
| 600776 | 2016 | 0.232 | 0.04 | 0.050103 | 0.00251027 | 22.07044 | 0.030561 | 45.44 |
| 601177 | 2016 | -0.07 | 0.04 | 0.050103 | 0.00251027 | 22.07183 | 0.010954 | 45.01 |
| 2488   | 2016 | -0.3  | 0.04 | 0.050103 | 0.00251027 | 22.16821 | -0.0975  | 16.59 |
| 600460 | 2016 | 0.513 | 0.04 | 0.050103 | 0.00251027 | 22.35011 | 0.029617 | 41.17 |
| 300347 | 2016 | 0.66  | 0.04 | 0.050103 | 0.00251027 | 21.59386 | 0.085217 | 28.24 |
| 2364   | 2016 | 1.243 | 0.04 | 0.050103 | 0.00251027 | 21.69928 | 0.067723 | 35.56 |
| 2284   | 2016 | -0.58 | 0.04 | 0.050103 | 0.00251027 | 22.20635 | 0.055966 | 38.82 |
| 300145 | 2016 | -0.56 | 0.04 | 0.050103 | 0.00251027 | 22.71182 | 0.12474  | 26.16 |
| 2247   | 2016 | -0.68 | 0.04 | 0.050103 | 0.00251027 | 22.20249 | 0.082856 | 15.32 |
| 2364   | 2016 | 0.202 | 0.04 | 0.050103 | 0.00251027 | 21.69928 | 0.067723 | 35.56 |
| 2364   | 2016 | 1.014 | 0.04 | 0.050103 | 0.00251027 | 21.69928 | 0.067723 | 35.56 |
| 2552   | 2016 | 0.953 | 0.04 | 0.050103 | 0.00251027 | 20.86564 | -0.23309 | 32.83 |
| 600570 | 2016 | 2.382 | 0.04 | 0.050103 | 0.00251027 | 22.23806 | -0.02075 | 20.72 |
| 600477 | 2016 | -0.29 | 0.04 | 0.050103 | 0.00251027 | 22.55986 | 0.192861 | 43.65 |
| 925    | 2016 | 0.519 | 0.04 | 0.050103 | 0.00251027 | 22.11251 | -0.11709 | 16.66 |
| 600677 | 2016 | -0.16 | 0.04 | 0.050103 | 0.00251027 | 23.16425 | -0.4336  | 19.2  |
| 2284   | 2016 | -0.28 | 0.04 | 0.050103 | 0.00251027 | 22.31617 | 0.055966 | 38.82 |
| 601177 | 2016 | 0.008 | 0.04 | 0.050103 | 0.00251027 | 22.07183 | 0.010954 | 45.01 |
| 2019   | 2016 | 0.995 | 0.04 | 0.050103 | 0.00251027 | 22.66682 | 0.175205 | 47.35 |
| 600460 | 2016 | 0.226 | 0.04 | 0.050103 | 0.00251027 | 22.35011 | 0.029617 | 41.17 |
| 600677 | 2016 | -0.16 | 0.04 | 0.050103 | 0.00251027 | 23.16425 | -0.4336  | 19.2  |
| 600797 | 2016 | 0.147 | 0.04 | 0.050103 | 0.00251027 | 22.12461 | 0.113565 | 19.65 |
| 600797 | 2016 | -0.36 | 0.04 | 0.050103 | 0.00251027 | 22.12461 | 0.113565 | 19.65 |
| 2508   | 2016 | -0.27 | 0.04 | 0.050103 | 0.00251027 | 22.58194 | 0.292544 | 49.68 |
| 300250 | 2016 | 1.02  | 0.04 | 0.050103 | 0.00251027 | 21.32215 | 0.082983 | 42.73 |

|        |      |       |      |          |            |          |          |       |
|--------|------|-------|------|----------|------------|----------|----------|-------|
| 2625   | 2016 | -0.44 | 0.04 | 0.050103 | 0.00251027 | 20.42189 | 0.109421 | 18.23 |
| 603558 | 2016 | -0.74 | 0.04 | 0.050103 | 0.00251027 | 21.55272 | 0.05631  | 43.72 |
| 300078 | 2016 | 0.219 | 0.04 | 0.050103 | 0.00251027 | 21.68194 | 0.091571 | 19.49 |
| 600987 | 2016 | -0.73 | 0.04 | 0.050103 | 0.00251027 | 21.53935 | 0.179881 | 32.9  |
| 603300 | 2016 | -0.54 | 0.04 | 0.050103 | 0.00251027 | 21.42584 | 0.035485 | 21.83 |
| 2019   | 2016 | 0.995 | 0.04 | 0.050103 | 0.00251027 | 22.66682 | 0.175205 | 47.35 |
| 2493   | 2016 | 0.124 | 0.04 | 0.050103 | 0.00251027 | 24.42805 | 0.132412 | 70.36 |
| 2415   | 2016 | 0.543 | 0.04 | 0.050103 | 0.00251027 | 24.44507 | 0.302158 | 39.91 |
| 2364   | 2016 | -0.08 | 0.04 | 0.050103 | 0.00251027 | 21.69928 | 0.067723 | 35.56 |
| 2444   | 2016 | -0.63 | 0.04 | 0.050103 | 0.00251027 | 22.68234 | 0.110077 | 44.54 |
| 603901 | 2016 | -0.51 | 0.04 | 0.050103 | 0.00251027 | 21.26654 | 0.097484 | 42.9  |
| 300145 | 2016 | -0.44 | 0.04 | 0.050103 | 0.00251027 | 22.71182 | 0.12474  | 26.16 |
| 2430   | 2016 | -0.31 | 0.04 | 0.050103 | 0.00251027 | 23.01718 | -0.07522 | 61.49 |
| 2493   | 2016 | 0.025 | 0.04 | 0.050103 | 0.00251027 | 24.42805 | 0.132412 | 70.36 |
| 607    | 2016 | 0.404 | 0.04 | 0.050103 | 0.00251027 | 21.81178 | 0.142806 | 48.13 |
| 300266 | 2016 | -0.05 | 0.04 | 0.050103 | 0.00251027 | 22.51982 | 0.062597 | 35.22 |
| 2444   | 2016 | -0.63 | 0.04 | 0.050103 | 0.00251027 | 22.68234 | 0.110077 | 44.54 |
| 2418   | 2016 | -0.51 | 0.04 | 0.050103 | 0.00251027 | 22.71208 | 0.099706 | 15.58 |
| 601177 | 2016 | -0.03 | 0.04 | 0.050103 | 0.00251027 | 22.07183 | 0.010954 | 45.01 |
| 600477 | 2016 | 0.005 | 0.04 | 0.050103 | 0.00251027 | 22.55986 | 0.192861 | 43.65 |
| 2415   | 2016 | 0.763 | 0.04 | 0.050103 | 0.00251027 | 24.44507 | 0.302158 | 39.91 |
| 2010   | 2016 | 0.709 | 0.04 | 0.050103 | 0.00251027 | 23.56296 | 0.06479  | 60.56 |
| 2122   | 2016 | -0.17 | 0.04 | 0.050103 | 0.00251027 | 22.61764 | -0.05504 | 29.97 |
| 300266 | 2016 | -0.05 | 0.04 | 0.050103 | 0.00251027 | 22.51982 | 0.062597 | 35.22 |
| 300459 | 2016 | -0.44 | 0.04 | 0.050103 | 0.00251027 | 22.40255 | 0.043774 | 18.09 |
| 300435 | 2016 | 0.143 | 0.04 | 0.050103 | 0.00251027 | 20.74247 | 0.08135  | 53.54 |
| 2444   | 2016 | -0.37 | 0.04 | 0.050103 | 0.00251027 | 22.68234 | 0.110077 | 44.54 |
| 600987 | 2016 | -0.73 | 0.04 | 0.050103 | 0.00251027 | 22.17808 | 0.179881 | 32.9  |
| 2479   | 2016 | -0.05 | 0.04 | 0.050103 | 0.00251027 | 22.36228 | 0.096004 | 38    |
| 559    | 2016 | -0.17 | 0.04 | 0.050103 | 0.00251027 | 23.16715 | 0.188514 | 51.53 |
| 300068 | 2016 | -0.03 | 0.04 | 0.050103 | 0.00251027 | 22.94131 | 0.075163 | 15.12 |
| 2266   | 2016 | -0.5  | 0.04 | 0.050103 | 0.00251027 | 22.6291  | 0.035591 | 20.22 |
| 600477 | 2016 | 0.147 | 0.04 | 0.050103 | 0.00251027 | 22.55986 | 0.192861 | 43.65 |
| 600571 | 2016 | 0.476 | 0.04 | 0.050103 | 0.00251027 | 21.2641  | 0.114829 | 19.58 |
| 2534   | 2016 | 0.493 | 0.04 | 0.050103 | 0.00251027 | 22.75011 | 0.070301 | 38.94 |
| 2135   | 2016 | -0.16 | 0.04 | 0.050103 | 0.00251027 | 22.87491 | 0.02191  | 36.81 |
| 300203 | 2016 | 0.173 | 0.04 | 0.050103 | 0.00251027 | 22.41213 | 0.148133 | 24.62 |
| 300078 | 2016 | 0.491 | 0.04 | 0.050103 | 0.00251027 | 21.80702 | 0.091571 | 19.49 |
| 300306 | 2016 | 0.39  | 0.04 | 0.050103 | 0.00251027 | 21.55324 | 0.046994 | 27.85 |
| 300244 | 2016 | -0.36 | 0.04 | 0.050103 | 0.00251027 | 22.4668  | 0.132742 | 39.6  |
| 300244 | 2016 | -0.69 | 0.04 | 0.050103 | 0.00251027 | 22.4668  | 0.132742 | 39.6  |
| 2534   | 2016 | 0.64  | 0.04 | 0.050103 | 0.00251027 | 22.75011 | 0.070301 | 38.94 |
| 2493   | 2016 | 0.052 | 0.04 | 0.050103 | 0.00251027 | 24.42805 | 0.132412 | 70.36 |
| 300203 | 2016 | 0.153 | 0.04 | 0.050103 | 0.00251027 | 22.41213 | 0.148133 | 24.62 |
| 300144 | 2016 | 0.681 | 0.04 | 0.050103 | 0.00251027 | 22.5921  | 0.139674 | 29.48 |
| 300459 | 2016 | -0.44 | 0.04 | 0.050103 | 0.00251027 | 22.40255 | 0.043774 | 18.09 |
| 559    | 2016 | -0.61 | 0.04 | 0.050103 | 0.00251027 | 23.16715 | 0.188514 | 51.53 |
| 300078 | 2016 | 0.219 | 0.04 | 0.050103 | 0.00251027 | 21.80702 | 0.091571 | 19.49 |
| 300020 | 2016 | -0.19 | 0.04 | 0.050103 | 0.00251027 | 22.46588 | 0.046312 | 24.34 |
| 600677 | 2016 | -0.16 | 0.04 | 0.050103 | 0.00251027 | 23.16425 | -0.4336  | 19.2  |
| 2019   | 2016 | -0.33 | 0.04 | 0.050103 | 0.00251027 | 22.66682 | 0.175205 | 47.35 |
| 2364   | 2016 | -0.08 | 0.04 | 0.050103 | 0.00251027 | 21.69928 | 0.067723 | 35.56 |
| 2214   | 2016 | 2.228 | 0.04 | 0.050103 | 0.00251027 | 20.94618 | 0.033598 | 29.1  |
| 2444   | 2016 | -0.29 | 0.04 | 0.050103 | 0.00251027 | 22.68234 | 0.110077 | 44.54 |

|        |      |       |      |          |            |          |          |       |
|--------|------|-------|------|----------|------------|----------|----------|-------|
| 2280   | 2016 | 0.122 | 0.04 | 0.050103 | 0.00251027 | 22.93594 | 0.056506 | 22.42 |
| 963    | 2016 | 0.461 | 0.04 | 0.050103 | 0.00251027 | 23.07408 | 0.200922 | 41.77 |
| 925    | 2016 | -0.14 | 0.04 | 0.050103 | 0.00251027 | 22.11251 | -0.11709 | 16.66 |
| 300020 | 2016 | 1.139 | 0.04 | 0.050103 | 0.00251027 | 22.46588 | 0.046312 | 24.34 |
| 603901 | 2016 | -0.53 | 0.04 | 0.050103 | 0.00251027 | 21.26654 | 0.097484 | 42.9  |
| 559    | 2016 | 0.138 | 0.04 | 0.050103 | 0.00251027 | 23.16715 | 0.188514 | 51.53 |
| 601177 | 2016 | 0.008 | 0.04 | 0.050103 | 0.00251027 | 22.07183 | 0.010954 | 45.01 |
| 600776 | 2016 | 1.07  | 0.04 | 0.050103 | 0.00251027 | 22.07044 | 0.030561 | 45.44 |
| 2570   | 2016 | 0.322 | 0.04 | 0.050103 | 0.00251027 | 22.51612 | -0.26557 | 33.06 |
| 603901 | 2016 | -0.37 | 0.04 | 0.050103 | 0.00251027 | 21.26654 | 0.097484 | 42.9  |
| 603901 | 2016 | -0.53 | 0.04 | 0.050103 | 0.00251027 | 21.26654 | 0.097484 | 42.9  |
| 2444   | 2016 | -0.63 | 0.04 | 0.050103 | 0.00251027 | 22.68234 | 0.110077 | 44.54 |
| 300266 | 2016 | -0.05 | 0.04 | 0.050103 | 0.00251027 | 22.51982 | 0.062597 | 35.22 |
| 600763 | 2016 | -0.55 | 0.04 | 0.050103 | 0.00251027 | 20.97484 | 0.147826 | 33.75 |
| 2552   | 2016 | 0.098 | 0.04 | 0.050103 | 0.00251027 | 20.86564 | -0.23309 | 32.83 |
| 603558 | 2016 | -0.69 | 0.04 | 0.050103 | 0.00251027 | 21.62208 | 0.05631  | 43.72 |
| 2430   | 2016 | -0.31 | 0.04 | 0.050103 | 0.00251027 | 23.01718 | -0.07522 | 61.49 |
| 2115   | 2016 | 0.128 | 0.04 | 0.050103 | 0.00251027 | 21.68229 | 0.025444 | 19.09 |
| 300068 | 2016 | 0.01  | 0.04 | 0.050103 | 0.00251027 | 22.74796 | 0.075163 | 15.12 |
| 600776 | 2016 | 0.232 | 0.04 | 0.050103 | 0.00251027 | 22.07044 | 0.030561 | 45.44 |
| 300266 | 2016 | -0.05 | 0.04 | 0.050103 | 0.00251027 | 21.91496 | 0.062597 | 35.22 |
| 600776 | 2016 | 0.374 | 0.04 | 0.050103 | 0.00251027 | 22.07044 | 0.030561 | 45.44 |
| 600987 | 2016 | -0.73 | 0.04 | 0.050103 | 0.00251027 | 22.17808 | 0.179881 | 32.9  |
| 2135   | 2016 | -0.5  | 0.04 | 0.050103 | 0.00251027 | 22.87491 | 0.02191  | 36.81 |
| 2570   | 2016 | 0.211 | 0.04 | 0.050103 | 0.00251027 | 22.44981 | -0.26557 | 33.06 |
| 2570   | 2016 | 0.432 | 0.04 | 0.050103 | 0.00251027 | 22.51612 | -0.26557 | 33.06 |
| 2570   | 2016 | 0.432 | 0.04 | 0.050103 | 0.00251027 | 22.51612 | -0.26557 | 33.06 |
| 600460 | 2016 | 0.513 | 0.04 | 0.050103 | 0.00251027 | 22.35011 | 0.029617 | 41.17 |
| 156    | 2016 | -0.13 | 0.04 | 0.050103 | 0.00251027 | 23.36467 | 0.004446 | 41.85 |
| 2115   | 2016 | 0.128 | 0.04 | 0.050103 | 0.00251027 | 21.68229 | 0.025444 | 19.09 |
| 600460 | 2016 | 0.456 | 0.04 | 0.050103 | 0.00251027 | 22.35011 | 0.029617 | 41.17 |
| 2236   | 2016 | 1.006 | 0.04 | 0.050103 | 0.00251027 | 23.45545 | 0.214835 | 41.26 |
| 2534   | 2016 | 0.292 | 0.04 | 0.050103 | 0.00251027 | 22.75011 | 0.070301 | 38.94 |
| 300250 | 2016 | 2.124 | 0.04 | 0.050103 | 0.00251027 | 21.19633 | 0.082983 | 42.73 |
| 963    | 2016 | 0.613 | 0.04 | 0.050103 | 0.00251027 | 23.39441 | 0.200922 | 41.77 |
| 2430   | 2016 | -0.25 | 0.04 | 0.050103 | 0.00251027 | 23.01718 | -0.07522 | 61.49 |
| 300459 | 2016 | -0.44 | 0.04 | 0.050103 | 0.00251027 | 22.40255 | 0.043774 | 18.09 |
| 300078 | 2016 | 0.219 | 0.04 | 0.050103 | 0.00251027 | 21.80702 | 0.091571 | 19.49 |
| 2637   | 2016 | 0.078 | 0.04 | 0.050103 | 0.00251027 | 22.3039  | 0.075465 | 16.79 |
| 2430   | 2016 | -0.31 | 0.04 | 0.050103 | 0.00251027 | 23.01718 | -0.07522 | 61.49 |
| 600797 | 2016 | 0.724 | 0.04 | 0.050103 | 0.00251027 | 21.83891 | 0.113565 | 19.65 |
| 300025 | 2016 | -0.41 | 0.04 | 0.050103 | 0.00251027 | 21.84055 | 0.078024 | 11.71 |
| 300078 | 2016 | 0.287 | 0.04 | 0.050103 | 0.00251027 | 21.80702 | 0.091571 | 19.49 |
| 600460 | 2016 | -0.02 | 0.04 | 0.050103 | 0.00251027 | 21.94632 | 0.029617 | 41.17 |
| 2534   | 2016 | 0.64  | 0.04 | 0.050103 | 0.00251027 | 22.75011 | 0.070301 | 38.94 |
| 2266   | 2016 | -0.44 | 0.04 | 0.050103 | 0.00251027 | 22.6291  | 0.035591 | 20.22 |
| 2430   | 2016 | -0.31 | 0.04 | 0.050103 | 0.00251027 | 23.01718 | -0.07522 | 61.49 |
| 300250 | 2016 | 1.02  | 0.04 | 0.050103 | 0.00251027 | 21.32215 | 0.082983 | 42.73 |
| 156    | 2016 | 0.632 | 0.04 | 0.050103 | 0.00251027 | 23.36467 | 0.004446 | 41.85 |
| 300244 | 2016 | 0.63  | 0.04 | 0.050103 | 0.00251027 | 22.4668  | 0.132742 | 39.6  |
| 300300 | 2016 | 0.419 | 0.04 | 0.050103 | 0.00251027 | 21.98159 | 0.018031 | 47.73 |
| 2010   | 2016 | 0.656 | 0.04 | 0.050103 | 0.00251027 | 23.56296 | 0.06479  | 60.56 |
| 909    | 2016 | 0.538 | 0.04 | 0.050103 | 0.00251027 | 22.26318 | 0.030931 | 47.7  |
| 300113 | 2016 | 1.261 | 0.04 | 0.050103 | 0.00251027 | 21.9506  | 0.23779  | 42.49 |

|        |      |       |      |          |            |          |          |       |
|--------|------|-------|------|----------|------------|----------|----------|-------|
| 300020 | 2016 | 0.872 | 0.04 | 0.050103 | 0.00251027 | 22.46588 | 0.046312 | 24.34 |
| 300360 | 2016 | 0.939 | 0.04 | 0.050103 | 0.00251027 | 21.30844 | 0.195321 | 25.76 |
| 300360 | 2016 | -0.39 | 0.04 | 0.050103 | 0.00251027 | 21.30844 | 0.195321 | 25.76 |
| 300451 | 2016 | 0.28  | 0.04 | 0.050103 | 0.00251027 | 20.84825 | 0.088725 | 20.66 |
| 2122   | 2016 | -0.17 | 0.04 | 0.050103 | 0.00251027 | 22.61764 | -0.05504 | 29.97 |
| 2266   | 2016 | 0.159 | 0.04 | 0.050103 | 0.00251027 | 22.6291  | 0.035591 | 20.22 |
| 2115   | 2016 | 0.964 | 0.04 | 0.050103 | 0.00251027 | 21.68229 | 0.025444 | 19.09 |
| 600797 | 2016 | 0.227 | 0.04 | 0.050103 | 0.00251027 | 22.12461 | 0.113565 | 19.65 |
| 2247   | 2016 | -0.68 | 0.04 | 0.050103 | 0.00251027 | 22.3302  | 0.082856 | 15.32 |
| 559    | 2016 | 0.255 | 0.04 | 0.050103 | 0.00251027 | 23.16715 | 0.188514 | 51.53 |
| 2479   | 2016 | -0.18 | 0.04 | 0.050103 | 0.00251027 | 22.36228 | 0.096004 | 38    |
| 600776 | 2016 | 1.07  | 0.04 | 0.050103 | 0.00251027 | 21.96916 | 0.030561 | 45.44 |
| 300360 | 2016 | -0.09 | 0.04 | 0.050103 | 0.00251027 | 21.30844 | 0.195321 | 25.76 |
| 925    | 2016 | -0.12 | 0.04 | 0.050103 | 0.00251027 | 22.11251 | -0.11709 | 16.66 |
| 300145 | 2016 | -0.21 | 0.04 | 0.050103 | 0.00251027 | 22.71182 | 0.12474  | 26.16 |
| 2284   | 2016 | -0.58 | 0.04 | 0.050103 | 0.00251027 | 22.31617 | 0.055966 | 38.82 |
| 600126 | 2016 | -0.42 | 0.04 | 0.050103 | 0.00251027 | 23.96435 | 0.049133 | 44.69 |
| 300145 | 2016 | -0.21 | 0.04 | 0.050103 | 0.00251027 | 22.71182 | 0.12474  | 26.16 |
| 559    | 2016 | -0.17 | 0.04 | 0.050103 | 0.00251027 | 23.16715 | 0.188514 | 51.53 |
| 300068 | 2016 | 0.058 | 0.04 | 0.050103 | 0.00251027 | 22.94131 | 0.075163 | 15.12 |
| 2625   | 2016 | -0.45 | 0.04 | 0.050103 | 0.00251027 | 20.42189 | 0.109421 | 18.23 |
| 2236   | 2016 | 1.202 | 0.04 | 0.050103 | 0.00251027 | 23.45545 | 0.214835 | 41.26 |
| 300145 | 2016 | -0.21 | 0.04 | 0.050103 | 0.00251027 | 22.71182 | 0.12474  | 26.16 |
| 2479   | 2016 | -0.18 | 0.04 | 0.050103 | 0.00251027 | 22.36228 | 0.096004 | 38    |
| 2236   | 2016 | 0.564 | 0.04 | 0.050103 | 0.00251027 | 23.45545 | 0.214835 | 41.26 |
| 300306 | 2016 | 0.39  | 0.04 | 0.050103 | 0.00251027 | 21.55324 | 0.046994 | 27.85 |
| 2637   | 2016 | 0.073 | 0.04 | 0.050103 | 0.00251027 | 22.3039  | 0.075465 | 16.79 |
| 2444   | 2016 | -0.01 | 0.04 | 0.050103 | 0.00251027 | 22.68234 | 0.110077 | 44.54 |
| 2364   | 2016 | 0.202 | 0.04 | 0.050103 | 0.00251027 | 21.69928 | 0.067723 | 35.56 |
| 300078 | 2016 | 0.381 | 0.04 | 0.050103 | 0.00251027 | 21.80702 | 0.091571 | 19.49 |
| 300020 | 2016 | -0.19 | 0.04 | 0.050103 | 0.00251027 | 22.46588 | 0.046312 | 24.34 |
| 600987 | 2016 | -0.73 | 0.04 | 0.050103 | 0.00251027 | 22.17808 | 0.179881 | 32.9  |
| 600570 | 2016 | 2.161 | 0.04 | 0.050103 | 0.00251027 | 22.23806 | -0.02075 | 20.72 |
| 963    | 2016 | 0.69  | 0.04 | 0.050103 | 0.00251027 | 23.39441 | 0.200922 | 41.77 |
| 600596 | 2016 | 0.275 | 0.04 | 0.050103 | 0.00251027 | 22.80202 | 0.019666 | 14.98 |
| 2534   | 2016 | 0.378 | 0.04 | 0.050103 | 0.00251027 | 22.75011 | 0.070301 | 38.94 |
| 2625   | 2016 | -0.55 | 0.04 | 0.050103 | 0.00251027 | 20.42189 | 0.109421 | 18.23 |
| 2115   | 2016 | 0.486 | 0.04 | 0.050103 | 0.00251027 | 21.68229 | 0.025444 | 19.09 |
| 300020 | 2016 | -0.19 | 0.04 | 0.050103 | 0.00251027 | 22.46588 | 0.046312 | 24.34 |
| 300145 | 2016 | -0.27 | 0.04 | 0.050103 | 0.00251027 | 22.71182 | 0.12474  | 26.16 |
| 300145 | 2016 | -0.21 | 0.04 | 0.050103 | 0.00251027 | 22.71182 | 0.12474  | 26.16 |
| 300459 | 2016 | -0.44 | 0.04 | 0.050103 | 0.00251027 | 22.40255 | 0.043774 | 18.09 |
| 300266 | 2016 | -0.05 | 0.04 | 0.050103 | 0.00251027 | 22.51982 | 0.062597 | 35.22 |
| 2115   | 2016 | 0.128 | 0.04 | 0.050103 | 0.00251027 | 21.68229 | 0.025444 | 19.09 |
| 600460 | 2016 | 0.548 | 0.04 | 0.050103 | 0.00251027 | 22.35011 | 0.029617 | 41.17 |
| 300244 | 2016 | -0.69 | 0.04 | 0.050103 | 0.00251027 | 22.4668  | 0.132742 | 39.6  |
| 300300 | 2016 | 0.419 | 0.04 | 0.050103 | 0.00251027 | 21.98159 | 0.018031 | 47.73 |
| 2415   | 2016 | 0.543 | 0.04 | 0.050103 | 0.00251027 | 24.44507 | 0.302158 | 39.91 |
| 2135   | 2016 | -0.21 | 0.04 | 0.050103 | 0.00251027 | 22.87491 | 0.02191  | 36.81 |
| 600596 | 2016 | 0.275 | 0.04 | 0.050103 | 0.00251027 | 22.42847 | 0.019666 | 14.98 |
| 2276   | 2016 | -0.33 | 0.04 | 0.050103 | 0.00251027 | 22.33908 | 0.067735 | 39.83 |
| 2095   | 2016 | 1.066 | 0.04 | 0.050103 | 0.00251027 | 20.89648 | 0.011364 | 48.75 |
| 600677 | 2016 | -0.16 | 0.04 | 0.050103 | 0.00251027 | 23.16425 | -0.4336  | 19.2  |
| 2418   | 2016 | -0.87 | 0.04 | 0.050103 | 0.00251027 | 22.71208 | 0.099706 | 15.58 |

|        |      |       |      |          |            |          |          |       |
|--------|------|-------|------|----------|------------|----------|----------|-------|
| 2767   | 2016 | -0.29 | 0.04 | 0.050103 | 0.00251027 | 20.46189 | 0.06803  | 49.06 |
| 2236   | 2016 | 1.569 | 0.04 | 0.050103 | 0.00251027 | 23.45545 | 0.214835 | 41.26 |
| 607    | 2016 | 0.404 | 0.04 | 0.050103 | 0.00251027 | 21.94465 | 0.142806 | 48.13 |
| 300266 | 2016 | -0.05 | 0.04 | 0.050103 | 0.00251027 | 22.51982 | 0.062597 | 35.22 |
| 2019   | 2016 | 0.166 | 0.04 | 0.050103 | 0.00251027 | 22.66682 | 0.175205 | 47.35 |
| 300478 | 2016 | 0.924 | 0.04 | 0.050103 | 0.00251027 | 20.24281 | 0.068581 | 38.25 |
| 2236   | 2016 | 1.194 | 0.04 | 0.050103 | 0.00251027 | 23.02129 | 0.214835 | 41.26 |
| 300113 | 2016 | 1.673 | 0.04 | 0.050103 | 0.00251027 | 21.9506  | 0.23779  | 42.49 |
| 600596 | 2016 | -0.74 | 0.04 | 0.050103 | 0.00251027 | 22.80202 | 0.019666 | 14.98 |
| 603901 | 2016 | -0.53 | 0.04 | 0.050103 | 0.00251027 | 21.26654 | 0.097484 | 42.9  |
| 300360 | 2016 | 0.028 | 0.04 | 0.050103 | 0.00251027 | 21.25182 | 0.195321 | 25.76 |
| 600126 | 2016 | -0.42 | 0.04 | 0.050103 | 0.00251027 | 23.96435 | 0.049133 | 44.69 |
| 2415   | 2016 | 0.763 | 0.04 | 0.050103 | 0.00251027 | 24.44507 | 0.302158 | 39.91 |
| 300145 | 2016 | -0.21 | 0.04 | 0.050103 | 0.00251027 | 22.71182 | 0.12474  | 26.16 |
| 600477 | 2016 | -0.06 | 0.04 | 0.050103 | 0.00251027 | 22.55986 | 0.192861 | 43.65 |
| 300145 | 2016 | -0.56 | 0.04 | 0.050103 | 0.00251027 | 22.71182 | 0.12474  | 26.16 |
| 600987 | 2016 | -0.73 | 0.04 | 0.050103 | 0.00251027 | 22.17808 | 0.179881 | 32.9  |
| 300078 | 2016 | 0.219 | 0.04 | 0.050103 | 0.00251027 | 21.80702 | 0.091571 | 19.49 |
| 2534   | 2016 | 0.292 | 0.04 | 0.050103 | 0.00251027 | 22.75011 | 0.070301 | 38.94 |
| 300020 | 2016 | -0.19 | 0.04 | 0.050103 | 0.00251027 | 22.46588 | 0.046312 | 24.34 |
| 300244 | 2016 | -0.69 | 0.04 | 0.050103 | 0.00251027 | 22.4668  | 0.132742 | 39.6  |
| 2479   | 2016 | -0.05 | 0.04 | 0.050103 | 0.00251027 | 22.36228 | 0.096004 | 38    |
| 559    | 2016 | -0.28 | 0.04 | 0.050103 | 0.00251027 | 23.16715 | 0.188514 | 51.53 |
| 2570   | 2016 | 0.432 | 0.04 | 0.050103 | 0.00251027 | 22.51612 | -0.26557 | 33.06 |
| 300250 | 2016 | 1.682 | 0.04 | 0.050103 | 0.00251027 | 21.32215 | 0.082983 | 42.73 |
| 300078 | 2016 | 0.226 | 0.04 | 0.050103 | 0.00251027 | 21.80702 | 0.091571 | 19.49 |
| 2534   | 2016 | 0.419 | 0.04 | 0.050103 | 0.00251027 | 22.75011 | 0.070301 | 38.94 |
| 300250 | 2016 | 1.02  | 0.04 | 0.050103 | 0.00251027 | 21.32215 | 0.082983 | 42.73 |
| 300478 | 2016 | 0.924 | 0.04 | 0.050103 | 0.00251027 | 20.24281 | 0.068581 | 38.25 |
| 300113 | 2016 | 1.673 | 0.04 | 0.050103 | 0.00251027 | 21.9506  | 0.23779  | 42.49 |
| 300020 | 2016 | 0.193 | 0.04 | 0.050103 | 0.00251027 | 22.46588 | 0.046312 | 24.34 |
| 2552   | 2016 | -0.14 | 0.04 | 0.050103 | 0.00251027 | 20.86564 | -0.23309 | 32.83 |
| 2444   | 2016 | -0.63 | 0.04 | 0.050103 | 0.00251027 | 22.68234 | 0.110077 | 44.54 |
| 559    | 2016 | 0.038 | 0.04 | 0.050103 | 0.00251027 | 22.67771 | 0.188514 | 51.53 |
| 559    | 2016 | 0.578 | 0.04 | 0.050103 | 0.00251027 | 23.16715 | 0.188514 | 51.53 |
| 300244 | 2016 | -0.69 | 0.04 | 0.050103 | 0.00251027 | 22.4668  | 0.132742 | 39.6  |
| 300244 | 2016 | -0.03 | 0.04 | 0.050103 | 0.00251027 | 22.4668  | 0.132742 | 39.6  |
| 600677 | 2016 | -0.16 | 0.04 | 0.050103 | 0.00251027 | 23.16425 | -0.4336  | 19.2  |
| 559    | 2016 | -0.08 | 0.04 | 0.050103 | 0.00251027 | 23.16715 | 0.188514 | 51.53 |
| 2508   | 2016 | -0.27 | 0.04 | 0.050103 | 0.00251027 | 22.58194 | 0.292544 | 49.68 |
| 2122   | 2016 | -0.17 | 0.04 | 0.050103 | 0.00251027 | 22.61764 | -0.05504 | 29.97 |
| 2276   | 2016 | -0.52 | 0.04 | 0.050103 | 0.00251027 | 22.33908 | 0.067735 | 39.83 |
| 2534   | 2016 | 0.286 | 0.04 | 0.050103 | 0.00251027 | 22.75011 | 0.070301 | 38.94 |
| 2236   | 2016 | 0.564 | 0.04 | 0.050103 | 0.00251027 | 23.45545 | 0.214835 | 41.26 |
| 2767   | 2016 | -0.29 | 0.04 | 0.050103 | 0.00251027 | 20.46189 | 0.06803  | 49.06 |
| 600596 | 2016 | -0.74 | 0.04 | 0.050103 | 0.00251027 | 22.80202 | 0.019666 | 14.98 |
| 2276   | 2016 | -0.36 | 0.04 | 0.050103 | 0.00251027 | 22.33908 | 0.067735 | 39.83 |
| 2010   | 2016 | 0.572 | 0.04 | 0.050103 | 0.00251027 | 23.56296 | 0.06479  | 60.56 |
| 2010   | 2016 | 0.709 | 0.04 | 0.050103 | 0.00251027 | 23.52122 | 0.06479  | 60.56 |
| 300266 | 2016 | -0.05 | 0.04 | 0.050103 | 0.00251027 | 22.51982 | 0.062597 | 35.22 |
| 300306 | 2016 | 0.39  | 0.04 | 0.050103 | 0.00251027 | 21.55324 | 0.046994 | 27.85 |
| 300078 | 2016 | 0.27  | 0.04 | 0.050103 | 0.00251027 | 21.80702 | 0.091571 | 19.49 |
| 2122   | 2016 | -0.1  | 0.04 | 0.050103 | 0.00251027 | 22.61764 | -0.05504 | 29.97 |
| 300451 | 2016 | 1.605 | 0.04 | 0.050103 | 0.00251027 | 20.84825 | 0.088725 | 20.66 |

|        |      |       |      |          |            |          |          |       |
|--------|------|-------|------|----------|------------|----------|----------|-------|
| 2508   | 2016 | -0.27 | 0.04 | 0.050103 | 0.00251027 | 22.56019 | 0.292544 | 49.68 |
| 600596 | 2016 | 0.403 | 0.04 | 0.050103 | 0.00251027 | 22.80202 | 0.019666 | 14.98 |
| 600126 | 2016 | -0.44 | 0.04 | 0.050103 | 0.00251027 | 23.96435 | 0.049133 | 44.69 |
| 2115   | 2016 | 0.964 | 0.04 | 0.050103 | 0.00251027 | 21.68229 | 0.025444 | 19.09 |
| 300113 | 2016 | 1.673 | 0.04 | 0.050103 | 0.00251027 | 21.9506  | 0.23779  | 42.49 |
| 2280   | 2016 | 1.036 | 0.04 | 0.050103 | 0.00251027 | 22.82209 | 0.056506 | 22.42 |
| 603806 | 2016 | 0.428 | 0.04 | 0.050103 | 0.00251027 | 22.42738 | 0.175104 | 56.29 |
| 600460 | 2016 | 0.513 | 0.04 | 0.050103 | 0.00251027 | 22.35011 | 0.029617 | 41.17 |
| 300025 | 2016 | -0.41 | 0.04 | 0.050103 | 0.00251027 | 21.84055 | 0.078024 | 11.71 |
| 300451 | 2016 | 0.28  | 0.04 | 0.050103 | 0.00251027 | 20.79328 | 0.088725 | 20.66 |
| 300145 | 2016 | -0.56 | 0.04 | 0.050103 | 0.00251027 | 22.71182 | 0.12474  | 26.16 |
| 300203 | 2016 | 0.153 | 0.04 | 0.050103 | 0.00251027 | 22.41213 | 0.148133 | 24.62 |
| 2493   | 2016 | 0.072 | 0.04 | 0.050103 | 0.00251027 | 24.42805 | 0.132412 | 70.36 |
| 300203 | 2016 | -0.29 | 0.04 | 0.050103 | 0.00251027 | 22.41213 | 0.148133 | 24.62 |
| 2552   | 2016 | 0.953 | 0.04 | 0.050103 | 0.00251027 | 20.86564 | -0.23309 | 32.83 |
| 600571 | 2016 | 0.925 | 0.04 | 0.050103 | 2.51E-03   | 21.2641  | 0.114829 | 19.58 |
| 600677 | 2016 | -0.49 | 0.04 | 0.050103 | 2.51E-03   | 23.16425 | -0.4336  | 19.2  |
| 2122   | 2016 | -0.05 | 0.04 | 0.050103 | 2.51E-03   | 22.61764 | -0.05504 | 29.97 |
| 2236   | 2016 | 1.203 | 0.04 | 0.050103 | 2.51E-03   | 23.45545 | 0.214835 | 41.26 |
| 300266 | 2016 | -0.15 | 0.04 | 0.050103 | 2.51E-03   | 22.51982 | 0.062597 | 35.22 |
| 2430   | 2016 | -0.58 | 0.04 | 0.050103 | 2.51E-03   | 23.01718 | -0.07522 | 61.49 |
| 2135   | 2016 | -0.21 | 0.04 | 0.050103 | 0.00251027 | 22.87491 | 0.02191  | 36.81 |
| 300300 | 2016 | 0.419 | 0.04 | 0.050103 | 0.00251027 | 21.98159 | 0.018031 | 47.73 |
| 300020 | 2016 | 0.872 | 0.04 | 0.050103 | 0.00251027 | 22.46588 | 0.046312 | 24.34 |
| 2430   | 2016 | -0.37 | 0.04 | 0.050103 | 0.00251027 | 23.01718 | -0.07522 | 61.49 |
| 300244 | 2016 | -0.49 | 0.04 | 0.050103 | 0.00251027 | 22.4668  | 0.132742 | 39.6  |
| 600677 | 2016 | -0.28 | 0.04 | 0.050103 | 0.00251027 | 23.16425 | -0.4336  | 19.2  |
| 2418   | 2016 | -0.87 | 0.04 | 0.050103 | 0.00251027 | 22.71208 | 0.099706 | 15.58 |
| 2767   | 2016 | -0.29 | 0.04 | 0.050103 | 0.00251027 | 20.46189 | 0.06803  | 49.06 |
| 601177 | 2016 | 0.008 | 0.04 | 0.050103 | 0.00251027 | 22.07183 | 0.010954 | 45.01 |
| 925    | 2016 | -0.25 | 0.04 | 0.050103 | 0.00251027 | 22.11251 | -0.11709 | 16.66 |
| 300145 | 2016 | -0.21 | 0.04 | 0.050103 | 0.00251027 | 22.71182 | 0.12474  | 26.16 |
| 2488   | 2016 | -0.3  | 0.04 | 0.050103 | 0.00251027 | 22.16821 | -0.0975  | 16.59 |
| 559    | 2016 | 0.055 | 0.04 | 0.050103 | 0.00251027 | 23.16715 | 0.188514 | 51.53 |
| 300068 | 2016 | -0.47 | 0.04 | 0.050103 | 0.00251027 | 22.94131 | 0.075163 | 15.12 |
| 300244 | 2016 | 0.63  | 0.04 | 0.050103 | 0.00251027 | 22.4668  | 0.132742 | 39.6  |
| 300266 | 2016 | -0.11 | 0.04 | 0.050103 | 0.00251027 | 22.51982 | 0.062597 | 35.22 |
| 2236   | 2016 | 0.943 | 0.04 | 0.050103 | 0.00251027 | 23.45545 | 0.214835 | 41.26 |
| 2493   | 2016 | 0.359 | 0.04 | 0.050103 | 0.00251027 | 24.42805 | 0.132412 | 70.36 |
| 600460 | 2016 | 0.467 | 0.04 | 0.050103 | 0.00251027 | 22.35011 | 0.029617 | 41.17 |
| 600460 | 2016 | 0.513 | 0.04 | 0.050103 | 0.00251027 | 22.35011 | 0.029617 | 41.17 |
| 2767   | 2016 | -0.29 | 0.04 | 0.050103 | 0.00251027 | 20.46189 | 0.06803  | 49.06 |
| 600677 | 2016 | -0.49 | 0.04 | 0.050103 | 0.00251027 | 23.16425 | -0.4336  | 19.2  |
| 925    | 2016 | 0.408 | 0.04 | 0.050103 | 0.00251027 | 22.11251 | -0.11709 | 16.66 |
| 2095   | 2016 | 1.066 | 0.04 | 0.050103 | 0.00251027 | 20.89648 | 0.011364 | 48.75 |
| 300244 | 2016 | -0.35 | 0.04 | 0.050103 | 0.00251027 | 22.4668  | 0.132742 | 39.6  |
| 300203 | 2016 | 0.153 | 0.04 | 0.050103 | 0.00251027 | 22.41213 | 0.148133 | 24.62 |
| 300360 | 2016 | -0.09 | 0.04 | 0.050103 | 0.00251027 | 21.30844 | 0.195321 | 25.76 |
| 2534   | 2016 | 1.081 | 0.04 | 0.050103 | 0.00251027 | 22.53782 | 0.070301 | 38.94 |
| 300306 | 2016 | 0.623 | 0.04 | 0.050103 | 0.00251027 | 21.55324 | 0.046994 | 27.85 |
| 300203 | 2016 | -0.29 | 0.04 | 0.050103 | 0.00251027 | 22.41213 | 0.148133 | 24.62 |
| 2444   | 2016 | -0.34 | 0.04 | 0.050103 | 0.00251027 | 22.52312 | 0.110077 | 44.54 |
| 300113 | 2016 | 1.673 | 0.04 | 0.050103 | 0.00251027 | 21.9506  | 0.23779  | 42.49 |
| 2236   | 2016 | 1.203 | 0.04 | 0.050103 | 0.00251027 | 23.45545 | 0.214835 | 41.26 |

|        |      |       |      |          |            |          |          |       |
|--------|------|-------|------|----------|------------|----------|----------|-------|
| 2010   | 2016 | 0.709 | 0.04 | 0.050103 | 0.00251027 | 23.56296 | 0.06479  | 60.56 |
| 2019   | 2016 | 0.194 | 0.04 | 0.050103 | 0.00251027 | 22.10571 | 0.175205 | 47.35 |
| 2552   | 2016 | 0.098 | 0.04 | 0.050103 | 0.00251027 | 20.90842 | -0.23309 | 32.83 |
| 600126 | 2016 | -0.42 | 0.04 | 0.050103 | 0.00251027 | 23.96435 | 0.049133 | 44.69 |
| 2247   | 2016 | -0.68 | 0.04 | 0.050103 | 0.00251027 | 22.3302  | 0.082856 | 15.32 |
| 2010   | 2016 | 0.594 | 0.04 | 0.050103 | 0.00251027 | 23.56296 | 0.06479  | 60.56 |
| 2418   | 2016 | -0.51 | 0.04 | 0.050103 | 0.00251027 | 22.71208 | 0.099706 | 15.58 |
| 300020 | 2016 | -0.19 | 0.04 | 0.050103 | 0.00251027 | 22.46588 | 0.046312 | 24.34 |
| 963    | 2016 | 0.641 | 0.04 | 0.050103 | 0.00251027 | 23.39441 | 0.200922 | 41.77 |
| 600571 | 2016 | 0.811 | 0.04 | 0.050103 | 0.00251027 | 21.2641  | 0.114829 | 19.58 |
| 300020 | 2016 | -0.19 | 0.04 | 0.050103 | 0.00251027 | 22.46588 | 0.046312 | 24.34 |
| 2266   | 2016 | -0.38 | 0.04 | 0.050103 | 0.00251027 | 22.6291  | 0.035591 | 20.22 |
| 2010   | 2016 | 0.68  | 0.04 | 0.050103 | 0.00251027 | 23.56296 | 0.06479  | 60.56 |
| 559    | 2016 | 0.096 | 0.04 | 0.050103 | 0.00251027 | 23.16715 | 0.188514 | 51.53 |
| 2010   | 2016 | 0.709 | 0.04 | 0.050103 | 0.00251027 | 23.56296 | 0.06479  | 60.56 |
| 600477 | 2016 | 0.005 | 0.04 | 0.050103 | 0.00251027 | 22.55986 | 0.192861 | 43.65 |
| 600596 | 2016 | 0.275 | 0.04 | 0.050103 | 0.00251027 | 22.80202 | 0.019666 | 14.98 |
| 600126 | 2016 | -0.88 | 0.04 | 0.050103 | 0.00251027 | 23.96435 | 0.049133 | 44.69 |
| 300020 | 2016 | -0.19 | 0.04 | 0.050103 | 0.00251027 | 22.46588 | 0.046312 | 24.34 |
| 300459 | 2016 | -0.44 | 0.04 | 0.050103 | 0.00251027 | 22.40255 | 0.043774 | 18.09 |
| 300020 | 2016 | -0.19 | 0.04 | 0.050103 | 0.00251027 | 22.46588 | 0.046312 | 24.34 |
| 300144 | 2016 | 0.681 | 0.04 | 0.050103 | 0.00251027 | 22.5921  | 0.139674 | 29.48 |
| 603806 | 2016 | 0.262 | 0.04 | 0.050103 | 0.00251027 | 22.42738 | 0.175104 | 56.29 |
| 2415   | 2016 | 0.646 | 0.04 | 0.050103 | 0.00251027 | 24.44507 | 0.302158 | 39.91 |
| 603806 | 2016 | 0.551 | 0.04 | 0.050103 | 0.00251027 | 22.42738 | 0.175104 | 56.29 |
| 300113 | 2016 | 1.673 | 0.04 | 0.050103 | 0.00251027 | 21.73091 | 0.23779  | 42.49 |
| 300113 | 2016 | 1.261 | 0.04 | 0.050103 | 0.00251027 | 21.9506  | 0.23779  | 42.49 |
| 300113 | 2016 | 1.673 | 0.04 | 0.050103 | 0.00251027 | 21.9506  | 0.23779  | 42.49 |
| 300025 | 2016 | -0.41 | 0.04 | 0.050103 | 0.00251027 | 21.1953  | 0.078024 | 11.71 |
| 300025 | 2016 | -0.41 | 0.04 | 0.050103 | 0.00251027 | 21.84055 | 0.078024 | 11.71 |
| 300306 | 2016 | 0.758 | 0.04 | 0.050103 | 0.00251027 | 21.55324 | 0.046994 | 27.85 |
| 559    | 2016 | 0.717 | 0.04 | 0.050103 | 0.00251027 | 23.16715 | 0.188514 | 51.53 |
| 559    | 2016 | 0.038 | 0.04 | 0.050103 | 0.00251027 | 23.16715 | 0.188514 | 51.53 |
| 2010   | 2016 | 0.556 | 0.04 | 0.050103 | 0.00251027 | 23.52122 | 0.06479  | 60.56 |
| 559    | 2016 | 0.038 | 0.04 | 0.050103 | 0.00251027 | 23.16715 | 0.188514 | 51.53 |
| 300266 | 2016 | -0.05 | 0.04 | 0.050103 | 0.00251027 | 22.51982 | 0.062597 | 35.22 |
| 2637   | 2016 | 0.076 | 0.04 | 0.050103 | 0.00251027 | 22.3039  | 0.075465 | 16.79 |
| 600570 | 2016 | 2.382 | 0.04 | 0.050103 | 0.00251027 | 22.23806 | -0.02075 | 20.72 |
| 2236   | 2016 | 0.564 | 0.04 | 0.050103 | 0.00251027 | 23.45545 | 0.214835 | 41.26 |
| 600677 | 2016 | 0.08  | 0.04 | 0.050103 | 0.00251027 | 23.16425 | -0.4336  | 19.2  |
| 925    | 2016 | -0.25 | 0.04 | 0.050103 | 0.00251027 | 21.67698 | -0.11709 | 16.66 |
| 300068 | 2016 | 0.01  | 0.04 | 0.050103 | 0.00251027 | 22.94131 | 0.075163 | 15.12 |
| 2570   | 2016 | 0.432 | 0.04 | 0.050103 | 0.00251027 | 22.51612 | -0.26557 | 33.06 |
| 2364   | 2016 | 0.359 | 0.04 | 0.050103 | 0.00251027 | 21.69928 | 0.067723 | 35.56 |
| 963    | 2016 | 0.461 | 0.04 | 0.050103 | 0.00251027 | 23.39441 | 0.200922 | 41.77 |
| 559    | 2016 | 0.038 | 0.04 | 0.050103 | 0.00251027 | 23.16715 | 0.188514 | 51.53 |
| 963    | 2016 | 0.69  | 0.04 | 0.050103 | 0.00251027 | 23.39441 | 0.200922 | 41.77 |
| 603300 | 2016 | -0.54 | 0.04 | 0.050103 | 0.00251027 | 22.22081 | 0.035485 | 21.83 |
| 300020 | 2016 | -0.19 | 0.04 | 0.050103 | 0.00251027 | 22.48056 | 0.046312 | 24.34 |
| 156    | 2016 | -0.25 | 0.04 | 0.050103 | 0.00251027 | 23.09067 | 0.004446 | 41.85 |
| 909    | 2016 | 0.483 | 0.04 | 0.050103 | 0.00251027 | 20.78166 | 0.030931 | 47.7  |
| 2135   | 2016 | -0.16 | 0.04 | 0.050103 | 0.00251027 | 22.87491 | 0.02191  | 36.81 |
| 300203 | 2016 | 0.295 | 0.04 | 0.050103 | 0.00251027 | 22.41213 | 0.148133 | 24.62 |
| 2418   | 2016 | -0.51 | 0.04 | 0.050103 | 0.00251027 | 22.71208 | 0.099706 | 15.58 |

|        |      |       |      |          |            |          |          |       |
|--------|------|-------|------|----------|------------|----------|----------|-------|
| 300078 | 2016 | 0.353 | 0.04 | 0.050103 | 0.00251027 | 21.80702 | 0.091571 | 19.49 |
| 2280   | 2016 | 0.974 | 0.04 | 0.050103 | 0.00251027 | 22.82209 | 0.056506 | 22.42 |
| 300078 | 2016 | 0.219 | 0.04 | 0.050103 | 0.00251027 | 21.80702 | 0.091571 | 19.49 |
| 300078 | 2016 | 0.27  | 0.04 | 0.050103 | 0.00251027 | 21.80702 | 0.091571 | 19.49 |
| 2364   | 2016 | 0.713 | 0.04 | 0.050103 | 0.00251027 | 21.69928 | 0.067723 | 35.56 |
| 2284   | 2016 | -0.58 | 0.04 | 0.050103 | 0.00251027 | 22.31617 | 0.055966 | 38.82 |
| 300068 | 2016 | 0.058 | 0.04 | 0.050103 | 0.00251027 | 22.94131 | 0.075163 | 15.12 |
| 300068 | 2016 | 0.058 | 0.04 | 0.050103 | 0.00251027 | 22.94131 | 0.075163 | 15.12 |
| 600460 | 2016 | 0.513 | 0.04 | 0.050103 | 0.00251027 | 22.35011 | 0.029617 | 41.17 |
| 603806 | 2016 | -0.02 | 0.04 | 0.050103 | 0.00251027 | 22.42738 | 0.175104 | 56.29 |
| 600596 | 2016 | 0.275 | 0.04 | 0.050103 | 0.00251027 | 22.80202 | 0.019666 | 14.98 |
| 300078 | 2016 | 0.219 | 0.04 | 0.050103 | 0.00251027 | 21.80702 | 0.091571 | 19.49 |
| 300451 | 2016 | 1.605 | 0.04 | 0.050103 | 0.00251027 | 20.84825 | 0.088725 | 20.66 |
| 2280   | 2016 | 0.122 | 0.04 | 0.050103 | 0.00251027 | 22.82209 | 0.056506 | 22.42 |
| 300203 | 2016 | 0.153 | 0.04 | 0.050103 | 0.00251027 | 22.17048 | 0.148133 | 24.62 |
| 300203 | 2016 | 0.374 | 0.04 | 0.050103 | 0.00251027 | 22.41213 | 0.148133 | 24.62 |
| 600570 | 2016 | 2.603 | 0.04 | 0.050103 | 0.00251027 | 22.23806 | -0.02075 | 20.72 |
| 2122   | 2016 | -0.17 | 0.04 | 0.050103 | 0.00251027 | 22.61764 | -0.05504 | 29.97 |
| 2247   | 2016 | -0.68 | 0.04 | 0.050103 | 2.51E-03   | 22.3302  | 0.082856 | 15.32 |
| 600570 | 2016 | 2.382 | 0.04 | 0.050103 | 2.51E-03   | 22.23806 | -0.02075 | 20.72 |
| 300306 | 2016 | 0.025 | 0.04 | 0.050103 | 2.51E-03   | 21.55324 | 0.046994 | 27.85 |
| 2214   | 2016 | 2.228 | 0.04 | 0.050103 | 2.51E-03   | 20.94615 | 0.033598 | 29.1  |
| 2247   | 2016 | -0.68 | 0.04 | 0.050103 | 2.51E-03   | 22.3302  | 0.082856 | 15.32 |
| 600763 | 2016 | -0.61 | 0.04 | 0.050103 | 2.51E-03   | 20.10336 | 0.147826 | 33.75 |
| 600570 | 2016 | 2.382 | 0.04 | 0.050103 | 2.51E-03   | 22.23806 | -0.02075 | 20.72 |
| 600776 | 2016 | 1.07  | 0.04 | 0.050103 | 2.51E-03   | 22.07044 | 0.030561 | 45.44 |
| 600571 | 2016 | 0.925 | 0.04 | 0.050103 | 0.00251027 | 21.2641  | 0.114829 | 19.58 |
| 600571 | 2016 | 0.925 | 0.04 | 0.050103 | 0.00251027 | 21.2641  | 0.114829 | 19.58 |
| 2625   | 2016 | -0.55 | 0.04 | 0.050103 | 0.00251027 | 20.4227  | 0.109421 | 18.23 |
| 2552   | 2016 | -0.03 | 0.04 | 0.050103 | 0.00251027 | 20.86564 | -0.23309 | 32.83 |
| 300360 | 2016 | 0.182 | 0.04 | 0.050103 | 0.00251027 | 21.30844 | 0.195321 | 25.76 |
| 2266   | 2016 | -0.4  | 0.04 | 0.050103 | 0.00251027 | 22.6291  | 0.035591 | 20.22 |
| 2493   | 2016 | 0.359 | 0.04 | 0.050103 | 0.00251027 | 24.42805 | 0.132412 | 70.36 |
| 600763 | 2016 | -0.52 | 0.04 | 0.050103 | 0.00251027 | 20.10336 | 0.147826 | 33.75 |
| 300347 | 2016 | 0.219 | 0.04 | 0.050103 | 0.00251027 | 21.59386 | 0.085217 | 28.24 |
| 963    | 2016 | 0.69  | 0.04 | 0.050103 | 0.00251027 | 23.39441 | 0.200922 | 41.77 |
| 300478 | 2016 | 0.924 | 0.04 | 0.050103 | 0.00251027 | 20.24281 | 0.068581 | 38.25 |
| 300068 | 2016 | -0.07 | 0.04 | 0.050103 | 0.00251027 | 22.94131 | 0.075163 | 15.12 |
| 600596 | 2016 | 0.584 | 0.04 | 0.050103 | 0.00251027 | 22.80202 | 0.019666 | 14.98 |
| 925    | 2016 | 0.519 | 0.04 | 0.050103 | 0.00251027 | 22.11251 | -0.11709 | 16.66 |
| 2570   | 2016 | 0.211 | 0.04 | 0.050103 | 0.00251027 | 22.51612 | -0.26557 | 33.06 |
| 2019   | 2016 | 0.995 | 0.04 | 0.050103 | 0.00251027 | 22.66682 | 0.175205 | 47.35 |
| 2280   | 2016 | 1.064 | 0.04 | 0.050103 | 0.00251027 | 22.82209 | 0.056506 | 22.42 |
| 925    | 2016 | -0.25 | 0.04 | 0.050103 | 0.00251027 | 22.11251 | -0.11709 | 16.66 |
| 300435 | 2016 | 0.143 | 0.04 | 0.050103 | 0.00251027 | 20.72802 | 0.08135  | 53.54 |
| 156    | 2016 | 0.632 | 0.04 | 0.050103 | 0.00251027 | 23.36467 | 0.004446 | 41.85 |
| 2364   | 2016 | 0.671 | 0.04 | 0.050103 | 0.00251027 | 21.6002  | 0.067723 | 35.56 |
| 601177 | 2016 | 0.008 | 0.04 | 0.050103 | 0.00251027 | 22.07183 | 0.010954 | 45.01 |
| 2637   | 2016 | 0.138 | 0.04 | 0.050103 | 2.51E-03   | 21.73355 | 0.075465 | 16.79 |
| 603558 | 2016 | -0.73 | 0.04 | 0.050103 | 2.51E-03   | 21.62208 | 0.05631  | 43.72 |
| 2266   | 2016 | 0.822 | 0.04 | 0.050103 | 2.51E-03   | 22.45069 | 0.035591 | 20.22 |
| 2552   | 2016 | -0.14 | 0.04 | 0.050103 | 2.51E-03   | 20.86564 | -0.23309 | 32.83 |
| 601177 | 2016 | 0.008 | 0.04 | 0.050103 | 2.51E-03   | 22.07183 | 0.010954 | 45.01 |
| 2444   | 2016 | -0.44 | 0.04 | 0.050103 | 2.51E-03   | 22.68234 | 0.110077 | 44.54 |



|        |      |       |      |          |            |          |          |       |
|--------|------|-------|------|----------|------------|----------|----------|-------|
| 600571 | 2016 | 1.694 | 0.04 | 0.050103 | 2.51E-03   | 21.2641  | 0.114829 | 19.58 |
| 2637   | 2016 | 0.076 | 0.04 | 0.050103 | 0.00251027 | 22.3039  | 0.075465 | 16.79 |
| 156    | 2016 | 0.632 | 0.04 | 0.050103 | 0.00251027 | 23.36467 | 0.004446 | 41.85 |
| 600987 | 2016 | -0.73 | 0.04 | 0.050103 | 0.00251027 | 22.17808 | 0.179881 | 32.9  |
| 2019   | 2016 | -0.26 | 0.04 | 0.050103 | 0.00251027 | 22.66682 | 0.175205 | 47.35 |
| 2430   | 2016 | -0.31 | 0.04 | 0.050103 | 0.00251027 | 23.01718 | -0.07522 | 61.49 |
| 2122   | 2016 | -0.1  | 0.04 | 0.050103 | 0.00251027 | 22.17527 | -0.05504 | 29.97 |
| 600477 | 2016 | -0.52 | 0.04 | 0.050103 | 0.00251027 | 22.14981 | 0.192861 | 43.65 |
| 300360 | 2016 | 0.939 | 0.04 | 0.050103 | 0.00251027 | 21.30844 | 0.195321 | 25.76 |
| 600460 | 2016 | -0.02 | 0.04 | 0.050103 | 2.51E-03   | 22.35011 | 0.029617 | 41.17 |
| 300244 | 2016 | -0.69 | 0.04 | 0.050103 | 2.51E-03   | 22.4668  | 0.132742 | 39.6  |
| 601177 | 2016 | -0.03 | 0.04 | 0.050103 | 2.51E-03   | 22.07183 | 0.010954 | 45.01 |
| 2276   | 2016 | -0.51 | 0.04 | 0.050103 | 2.51E-03   | 22.33908 | 0.067735 | 39.83 |
| 601177 | 2016 | -0.31 | 0.04 | 0.050103 | 2.51E-03   | 22.07183 | 0.010954 | 45.01 |
| 300266 | 2016 | -0.11 | 0.04 | 0.050103 | 0.00251027 | 22.51982 | 0.062597 | 35.22 |
| 601177 | 2016 | -0.31 | 0.04 | 0.050103 | 0.00251027 | 22.07183 | 0.010954 | 45.01 |
| 600571 | 2016 | 0.925 | 0.04 | 0.050103 | 0.00251027 | 21.2641  | 0.114829 | 19.58 |
| 2280   | 2016 | 1.064 | 0.04 | 0.050103 | 0.00251027 | 22.82209 | 0.056506 | 22.42 |
| 2430   | 2016 | -0.18 | 0.04 | 0.050103 | 0.00251027 | 22.74333 | -0.07522 | 61.49 |
| 2214   | 2016 | 2.228 | 0.04 | 0.050103 | 0.00251027 | 20.94615 | 0.033598 | 29.1  |
| 2276   | 2016 | -0.23 | 0.04 | 0.050103 | 0.00251027 | 22.33908 | 0.067735 | 39.83 |
| 2276   | 2016 | -0.51 | 0.04 | 0.050103 | 0.00251027 | 22.33908 | 0.067735 | 39.83 |
| 603558 | 2016 | -0.22 | 0.04 | 0.050103 | 0.00251027 | 21.62208 | 0.05631  | 43.72 |
| 2284   | 2016 | -0.58 | 0.04 | 0.050103 | 0.00251027 | 22.31617 | 0.055966 | 38.82 |
| 2266   | 2016 | -0.17 | 0.04 | 0.050103 | 0.00251027 | 22.6291  | 0.035591 | 20.22 |
| 2010   | 2016 | 0.709 | 0.04 | 0.050103 | 0.00251027 | 23.56296 | 0.06479  | 60.56 |
| 300244 | 2016 | -0.69 | 0.04 | 0.050103 | 0.00251027 | 22.05897 | 0.132742 | 39.6  |
| 300435 | 2016 | 0.143 | 0.04 | 0.050103 | 0.00251027 | 20.74247 | 0.08135  | 53.54 |
| 300451 | 2016 | 1.164 | 0.04 | 0.050103 | 0.00251027 | 20.84825 | 0.088725 | 20.66 |
| 300020 | 2016 | 1.139 | 0.04 | 0.050103 | 0.00251027 | 22.46588 | 0.046312 | 24.34 |
| 300078 | 2016 | 0.652 | 0.04 | 0.050103 | 0.00251027 | 21.80702 | 0.091571 | 19.49 |
| 300203 | 2016 | 0.295 | 0.04 | 0.050103 | 0.00251027 | 22.41213 | 0.148133 | 24.62 |
| 600797 | 2016 | 0.178 | 0.04 | 0.050103 | 0.00251027 | 22.12461 | 0.113565 | 19.65 |
| 300145 | 2016 | -0.43 | 0.04 | 0.050103 | 0.00251027 | 22.71182 | 0.12474  | 26.16 |
| 2019   | 2016 | 0.995 | 0.04 | 0.050103 | 0.00251027 | 22.66682 | 0.175205 | 47.35 |
| 2415   | 2016 | 0.572 | 0.04 | 0.050103 | 0.00251027 | 24.44507 | 0.302158 | 39.91 |
| 300020 | 2016 | -0.19 | 0.04 | 0.050103 | 0.00251027 | 22.46588 | 0.046312 | 24.34 |
| 2430   | 2016 | -0.58 | 0.04 | 0.050103 | 0.00251027 | 23.01718 | -0.07522 | 61.49 |
| 2479   | 2016 | -0.18 | 0.04 | 0.050103 | 0.00251027 | 22.36228 | 0.096004 | 38    |
| 603558 | 2016 | -0.86 | 0.04 | 0.050103 | 0.00251027 | 21.62208 | 0.05631  | 43.72 |
| 600570 | 2016 | 2.161 | 0.04 | 0.050103 | 0.00251027 | 22.17094 | -0.02075 | 20.72 |
| 600776 | 2016 | 0.325 | 0.04 | 0.050103 | 0.00251027 | 22.07044 | 0.030561 | 45.44 |
| 2276   | 2016 | 0.276 | 0.04 | 0.050103 | 0.00251027 | 22.33908 | 0.067735 | 39.83 |
| 2266   | 2016 | -0.48 | 0.04 | 0.050103 | 0.00251027 | 22.6291  | 0.035591 | 20.22 |
| 300459 | 2016 | -0.44 | 0.04 | 0.050103 | 0.00251027 | 22.40255 | 0.043774 | 18.09 |
| 963    | 2016 | 0.346 | 0.04 | 0.050103 | 0.00251027 | 23.39441 | 0.200922 | 41.77 |
| 2236   | 2016 | 1.569 | 0.04 | 0.050103 | 0.00251027 | 23.45545 | 0.214835 | 41.26 |
| 600596 | 2016 | 0.403 | 0.04 | 0.050103 | 0.00251027 | 22.80202 | 0.019666 | 14.98 |
| 600596 | 2016 | 0.016 | 0.04 | 0.050103 | 0.00251027 | 22.80202 | 0.019666 | 14.98 |
| 2767   | 2016 | -0.29 | 0.04 | 0.050103 | 0.00251027 | 20.46189 | 0.06803  | 49.06 |
| 300459 | 2016 | -0.44 | 0.04 | 0.050103 | 0.00251027 | 22.40255 | 0.043774 | 18.09 |
| 2010   | 2016 | 0.709 | 0.04 | 0.050103 | 0.00251027 | 23.56296 | 0.06479  | 60.56 |
| 600677 | 2016 | -0.27 | 0.04 | 0.050103 | 0.00251027 | 23.16425 | -0.4336  | 19.2  |
| 600596 | 2016 | -0.21 | 0.04 | 0.050103 | 0.00251027 | 22.80202 | 0.019666 | 14.98 |

|        |      |       |      |          |            |          |          |       |
|--------|------|-------|------|----------|------------|----------|----------|-------|
| 2418   | 2016 | -0.29 | 0.04 | 0.050103 | 0.00251027 | 22.71208 | 0.099706 | 15.58 |
| 2266   | 2016 | 0.159 | 0.04 | 0.050103 | 0.00251027 | 22.6291  | 0.035591 | 20.22 |
| 2430   | 2016 | 0.337 | 0.04 | 0.050103 | 0.00251027 | 23.01718 | -0.07522 | 61.49 |
| 2284   | 2016 | -0.36 | 0.04 | 0.050103 | 0.00251027 | 22.31617 | 0.055966 | 38.82 |
| 300250 | 2016 | 1.461 | 0.04 | 0.050103 | 0.00251027 | 21.32215 | 0.082983 | 42.73 |
| 2415   | 2016 | 0.543 | 0.04 | 0.050103 | 0.00251027 | 24.44507 | 0.302158 | 39.91 |
| 600571 | 2016 | 0.925 | 0.04 | 0.050103 | 0.00251027 | 21.2641  | 0.114829 | 19.58 |
| 2625   | 2016 | -0.44 | 0.04 | 0.050103 | 0.00251027 | 20.42189 | 0.109421 | 18.23 |
| 2122   | 2016 | -0.17 | 0.04 | 0.050103 | 0.00251027 | 22.61764 | -0.05504 | 29.97 |
| 2115   | 2016 | 0.081 | 0.04 | 0.050103 | 0.00251027 | 21.68229 | 0.025444 | 19.09 |
| 2570   | 2016 | 0.211 | 0.04 | 0.050103 | 0.00251027 | 22.51612 | -0.26557 | 33.06 |
| 300306 | 2016 | 0.555 | 0.04 | 0.050103 | 0.00251027 | 21.55324 | 0.046994 | 27.85 |
| 603806 | 2016 | 0.401 | 0.04 | 0.050103 | 0.00251027 | 22.27266 | 0.175104 | 56.29 |
| 2280   | 2016 | 1.447 | 0.04 | 0.050103 | 0.00251027 | 22.82209 | 0.056506 | 22.42 |
| 300145 | 2016 | -0.21 | 0.04 | 0.050103 | 0.00251027 | 22.71182 | 0.12474  | 26.16 |
| 600677 | 2016 | -0.16 | 0.04 | 0.050103 | 0.00251027 | 23.16425 | -0.4336  | 19.2  |
| 2214   | 2016 | 2.228 | 0.04 | 0.050103 | 0.00251027 | 20.94618 | 0.033598 | 29.1  |
| 2430   | 2016 | -0.31 | 0.04 | 0.050103 | 0.00251027 | 23.01718 | -0.07522 | 61.49 |
| 300347 | 2016 | 0.66  | 0.04 | 0.050103 | 0.00251027 | 21.35254 | 0.085217 | 28.24 |
| 603300 | 2016 | -0.54 | 0.04 | 0.050103 | 0.00251027 | 22.22081 | 0.035485 | 21.83 |
| 600477 | 2016 | 0.81  | 0.04 | 0.050103 | 0.00251027 | 22.55986 | 0.192861 | 43.65 |
| 2418   | 2016 | -0.49 | 0.04 | 0.050103 | 0.00251027 | 22.71208 | 0.099706 | 15.58 |
| 600677 | 2016 | -0.22 | 0.04 | 0.050103 | 0.00251027 | 23.16425 | -0.4336  | 19.2  |
| 2276   | 2016 | -0.29 | 0.04 | 0.050103 | 0.00251027 | 22.33908 | 0.067735 | 39.83 |
| 528    | 2016 | 0.436 | 0.04 | 0.802962 | 0.64474815 | 23.74779 | 0.005377 | 34.98 |
| 600249 | 2016 | 0.377 | 0.04 | 0.802962 | 0.64474815 | 21.91015 | -0.00332 | 33.34 |
| 528    | 2016 | -0.19 | 0.04 | 0.802962 | 0.64474815 | 23.74779 | 0.005377 | 34.98 |
| 528    | 2016 | -0.19 | 0.04 | 0.802962 | 0.64474815 | 23.48307 | 0.005377 | 34.98 |
| 601003 | 2016 | -0.6  | 0.04 | 0.802962 | 0.64474815 | 23.75879 | 0.042382 | 74.18 |
| 528    | 2016 | -0.19 | 0.04 | 0.802962 | 0.64474815 | 23.74779 | 0.005377 | 34.98 |
| 601003 | 2016 | -0.6  | 0.04 | 0.802962 | 0.64474815 | 23.75879 | 0.042382 | 74.18 |
| 528    | 2016 | 0.035 | 0.04 | 0.802962 | 0.64474815 | 23.74779 | 0.005377 | 34.98 |
| 600249 | 2016 | -0.71 | 0.04 | 0.802962 | 0.64474815 | 21.91015 | -0.00332 | 33.34 |
| 528    | 2016 | -0.02 | 0.04 | 0.802962 | 0.64474815 | 23.74779 | 0.005377 | 34.98 |
| 600249 | 2016 | -0.05 | 0.04 | 0.802962 | 0.64474815 | 21.73771 | -0.00332 | 33.34 |
| 600249 | 2016 | 0.377 | 0.04 | 0.802962 | 0.64474815 | 21.91015 | -0.00332 | 33.34 |
| 600249 | 2016 | -0.03 | 0.04 | 0.802962 | 0.64474815 | 21.91015 | -0.00332 | 33.34 |
| 600249 | 2016 | -0.2  | 0.04 | 0.802962 | 0.64474815 | 21.91015 | -0.00332 | 33.34 |
| 600249 | 2016 | -0.71 | 0.04 | 0.802962 | 0.64474815 | 21.91015 | -0.00332 | 33.34 |
| 528    | 2016 | -0.19 | 0.04 | 0.802962 | 0.64474815 | 23.74779 | 0.005377 | 34.98 |
| 528    | 2016 | 0.012 | 0.04 | 0.802962 | 0.64474815 | 23.74779 | 0.005377 | 34.98 |
| 528    | 2016 | -0.19 | 0.04 | 0.802962 | 0.64474815 | 23.74779 | 0.005377 | 34.98 |
| 528    | 2016 | 0.259 | 0.04 | 0.802962 | 0.64474815 | 23.74779 | 0.005377 | 34.98 |
| 528    | 2016 | -0.08 | 0.04 | 0.802962 | 0.64474815 | 23.74779 | 0.005377 | 34.98 |
| 528    | 2016 | 0.061 | 0.04 | 0.802962 | 0.64474815 | 23.74779 | 0.005377 | 34.98 |
| 601003 | 2016 | -0.6  | 0.04 | 0.802962 | 0.64474815 | 23.75879 | 0.042382 | 74.18 |
| 600249 | 2016 | -0.03 | 0.04 | 0.802962 | 0.64474815 | 21.91015 | -0.00332 | 33.34 |
| 528    | 2016 | 0.061 | 0.04 | 0.802962 | 0.64474815 | 23.74779 | 0.005377 | 34.98 |
| 528    | 2016 | 0.111 | 0.04 | 0.802962 | 0.64474815 | 23.74779 | 0.005377 | 34.98 |
| 528    | 2016 | 0.036 | 0.04 | 0.802962 | 0.64474815 | 23.74779 | 0.005377 | 34.98 |
| 528    | 2016 | 0.015 | 0.04 | 0.802962 | 0.64474815 | 23.74779 | 0.005377 | 34.98 |
| 600249 | 2016 | 0.618 | 0.04 | 0.802962 | 0.64474815 | 21.91015 | -0.00332 | 33.34 |
| 601636 | 2016 | -0.25 | 0.04 | 1.015219 | 1.0306705  | 23.23819 | 0.138534 | 33.5  |
| 2567   | 2016 | 0.426 | 0.04 | 1.015219 | 1.0306705  | 22.27268 | 0.086259 | 23.7  |

|        |      |       |      |          |           |          |          |       |
|--------|------|-------|------|----------|-----------|----------|----------|-------|
| 600961 | 2016 | 0.128 | 0.04 | 1.015219 | 1.0306705 | 22.49819 | 0.131088 | 40.24 |
| 601636 | 2016 | 0.63  | 0.04 | 1.015219 | 1.0306705 | 23.23819 | 0.138534 | 33.5  |
| 600479 | 2016 | 0.322 | 0.04 | 1.015219 | 1.0306705 | 21.83252 | 0.083191 | 26.58 |
| 600961 | 2016 | 0.128 | 0.04 | 1.015219 | 1.0306705 | 22.49819 | 0.131088 | 40.24 |
| 600458 | 2016 | 0.7   | 0.04 | 1.015219 | 1.0306705 | 23.31905 | 0.047354 | 36.43 |
| 600479 | 2016 | -0.26 | 0.04 | 1.015219 | 1.0306705 | 21.83252 | 0.083191 | 26.58 |
| 601636 | 2016 | -0.25 | 0.04 | 1.015219 | 1.0306705 | 22.53941 | 0.138534 | 33.5  |
| 600479 | 2016 | -0.21 | 0.04 | 1.015219 | 1.0306705 | 21.83252 | 0.083191 | 26.58 |
| 600479 | 2016 | -0.23 | 0.04 | 1.015219 | 1.0306705 | 21.24017 | 0.083191 | 26.58 |
| 600479 | 2016 | -0.26 | 0.04 | 1.015219 | 1.0306705 | 21.83252 | 0.083191 | 26.58 |
| 2523   | 2016 | 0.121 | 0.04 | 1.015219 | 1.0306705 | 21.82293 | 0.056259 | 29.05 |
| 2567   | 2016 | -0.6  | 0.04 | 1.015219 | 1.0306705 | 22.27268 | 0.086259 | 23.7  |
| 601636 | 2016 | 0.036 | 0.04 | 1.015219 | 1.0306705 | 23.23819 | 0.138534 | 33.5  |
| 600458 | 2016 | 0.586 | 0.04 | 1.015219 | 1.0306705 | 23.31905 | 0.047354 | 36.43 |
| 600479 | 2016 | -0.26 | 0.04 | 1.015219 | 1.0306705 | 21.83252 | 0.083191 | 26.58 |
| 601636 | 2016 | -0.25 | 0.04 | 1.015219 | 1.0306705 | 23.23819 | 0.138534 | 33.5  |
| 600458 | 2016 | 0.573 | 0.04 | 1.015219 | 1.0306705 | 23.31905 | 0.047354 | 36.43 |
| 601636 | 2016 | -0.35 | 0.04 | 1.015219 | 1.0306705 | 23.23819 | 0.138534 | 33.5  |
| 601636 | 2016 | 0.63  | 0.04 | 1.015219 | 1.0306705 | 23.23819 | 0.138534 | 33.5  |
| 2567   | 2016 | 0.426 | 0.04 | 1.015219 | 1.0306705 | 22.27268 | 0.086259 | 23.7  |
| 2567   | 2016 | 0.426 | 0.04 | 1.015219 | 1.0306705 | 22.27268 | 0.086259 | 23.7  |
| 2523   | 2016 | 0.356 | 0.04 | 1.015219 | 1.0306705 | 21.82293 | 0.056259 | 29.05 |
| 600458 | 2016 | 0.573 | 0.04 | 1.015219 | 1.0306705 | 23.31905 | 0.047354 | 36.43 |
| 2523   | 2016 | 0.033 | 0.04 | 1.015219 | 1.0306705 | 21.82293 | 0.056259 | 29.05 |
| 2523   | 2016 | 0.356 | 0.04 | 1.015219 | 1.0306705 | 21.50642 | 0.056259 | 29.05 |
| 2567   | 2016 | 0.426 | 0.04 | 1.015219 | 1.0306705 | 22.27268 | 0.086259 | 23.7  |
| 600479 | 2016 | -0.26 | 0.04 | 1.015219 | 1.0306705 | 21.83252 | 0.083191 | 26.58 |
| 601636 | 2016 | -0.25 | 0.04 | 1.015219 | 1.0306705 | 23.23819 | 0.138534 | 33.5  |
| 2567   | 2016 | 0.426 | 0.04 | 1.015219 | 1.0306705 | 22.27268 | 0.086259 | 23.7  |
| 600458 | 2016 | 0.7   | 0.04 | 1.015219 | 1.0306705 | 23.31905 | 0.047354 | 36.43 |
| 600479 | 2016 | 0.424 | 0.04 | 1.015219 | 1.0306705 | 21.83252 | 0.083191 | 26.58 |
| 2567   | 2016 | -0.51 | 0.04 | 1.015219 | 1.0306705 | 22.27268 | 0.086259 | 23.7  |
| 600961 | 2016 | 0.128 | 0.04 | 1.015219 | 1.0306705 | 22.48372 | 0.131088 | 40.24 |
| 2567   | 2016 | -0.46 | 0.04 | 1.015219 | 1.0306705 | 22.01938 | 0.086259 | 23.7  |
| 2523   | 2016 | 0.033 | 0.04 | 1.015219 | 1.0306705 | 21.82293 | 0.056259 | 29.05 |
| 2523   | 2016 | 0.121 | 0.04 | 1.015219 | 1.0306705 | 21.82293 | 0.056259 | 29.05 |
| 600458 | 2016 | 0.573 | 0.04 | 1.015219 | 1.0306705 | 23.1001  | 0.047354 | 36.43 |
| 2523   | 2016 | 0.033 | 0.04 | 1.015219 | 1.0306705 | 21.82293 | 0.056259 | 29.05 |
| 600479 | 2016 | 0.424 | 0.04 | 1.015219 | 1.0306705 | 21.83252 | 0.083191 | 26.58 |
| 2523   | 2016 | 0.121 | 0.04 | 1.015219 | 1.0306705 | 21.82293 | 0.056259 | 29.05 |
| 601636 | 2016 | -0.23 | 0.04 | 1.015219 | 1.0306705 | 23.23819 | 0.138534 | 33.5  |
| 600458 | 2016 | 0.242 | 0.04 | 1.015219 | 1.0306705 | 23.31905 | 0.047354 | 36.43 |
| 600479 | 2016 | -0.26 | 0.04 | 1.015219 | 1.0306705 | 21.83252 | 0.083191 | 26.58 |
| 600479 | 2016 | -0.26 | 0.04 | 1.015219 | 1.0306705 | 21.83252 | 0.083191 | 26.58 |
| 2166   | 2016 | 0.65  | 0.04 | 1.011038 | 1.0221975 | 21.61168 | 0.082234 | 17.57 |
| 603166 | 2016 | -0.52 | 0.04 | 1.011038 | 1.0221975 | 21.98859 | 0.048362 | 68.51 |
| 2175   | 2016 | -0.59 | 0.04 | 1.011038 | 1.0221975 | 21.74316 | 0.035273 | 12.1  |
| 603166 | 2016 | -0.52 | 0.04 | 1.011038 | 1.0221975 | 21.98859 | 0.048362 | 68.51 |
| 2175   | 2016 | 0.624 | 0.04 | 1.011038 | 1.0221975 | 21.74316 | 0.035273 | 12.1  |
| 603166 | 2016 | -0.18 | 0.04 | 1.011038 | 1.0221975 | 21.98859 | 0.048362 | 68.51 |
| 2166   | 2016 | 0.65  | 0.04 | 1.011038 | 1.0221975 | 21.11038 | 0.082234 | 17.57 |
| 2275   | 2016 | -0.14 | 0.04 | 1.011038 | 1.0221975 | 21.77752 | 0.162295 | 61.11 |
| 2275   | 2016 | -0.58 | 0.04 | 1.011038 | 1.0221975 | 21.77752 | 0.162295 | 61.11 |
| 2175   | 2016 | -0.7  | 0.04 | 1.011038 | 1.0221975 | 21.74316 | 0.035273 | 12.1  |

|        |      |       |      |          |            |          |          |       |
|--------|------|-------|------|----------|------------|----------|----------|-------|
| 603166 | 2016 | -0.01 | 0.04 | 1.011038 | 1.0221975  | 21.98859 | 0.048362 | 68.51 |
| 2175   | 2016 | -0.59 | 0.04 | 1.011038 | 1.0221975  | 21.74316 | 0.035273 | 12.1  |
| 2275   | 2016 | -0.38 | 0.04 | 1.011038 | 1.0221975  | 21.77752 | 0.162295 | 61.11 |
| 2166   | 2016 | 0.65  | 0.04 | 1.011038 | 1.0221975  | 21.61168 | 0.082234 | 17.57 |
| 2275   | 2016 | -0.58 | 0.04 | 1.011038 | 1.0221975  | 21.74352 | 0.162295 | 61.11 |
| 2275   | 2016 | -0.58 | 0.04 | 1.011038 | 1.0221975  | 21.77752 | 0.162295 | 61.11 |
| 2275   | 2016 | -0.58 | 0.04 | 1.011038 | 1.0221975  | 21.77752 | 0.162295 | 61.11 |
| 603166 | 2016 | -0.52 | 0.04 | 1.011038 | 1.0221975  | 21.98859 | 0.048362 | 68.51 |
| 603166 | 2016 | -0.52 | 0.04 | 1.011038 | 1.0221975  | 21.98859 | 0.048362 | 68.51 |
| 603166 | 2016 | -0.52 | 0.04 | 1.011038 | 1.0221975  | 21.98859 | 0.048362 | 68.51 |
| 2175   | 2016 | 0.624 | 0.04 | 1.011038 | 1.0221975  | 21.74316 | 0.035273 | 12.1  |
| 2175   | 2016 | -0.38 | 0.04 | 1.011038 | 1.0221975  | 21.27734 | 0.035273 | 12.1  |
| 2275   | 2016 | -0.38 | 0.04 | 1.011038 | 1.0221975  | 21.77752 | 0.162295 | 61.11 |
| 2275   | 2016 | 0.74  | 0.04 | 1.011038 | 1.0221975  | 21.77752 | 0.162295 | 61.11 |
| 2275   | 2016 | -0.31 | 0.04 | 1.011038 | 1.0221975  | 21.77752 | 0.162295 | 61.11 |
| 603166 | 2016 | -0.01 | 0.04 | 1.011038 | 1.0221975  | 21.68469 | 0.048362 | 68.51 |
| 2275   | 2016 | -0.14 | 0.04 | 1.011038 | 1.0221975  | 21.77752 | 0.162295 | 61.11 |
| 2288   | 2016 | -0.74 | 0.05 | 0.924189 | 0.85412541 | 21.54396 | -0.05276 | 18.32 |
| 2288   | 2016 | -0.1  | 0.05 | 0.924189 | 0.85412541 | 21.54396 | -0.05276 | 18.32 |
| 2288   | 2016 | -0.1  | 0.05 | 0.924189 | 0.85412541 | 21.54396 | -0.05276 | 18.32 |
| 2233   | 2016 | -0.19 | 0.05 | 0.924189 | 0.85412541 | 22.6304  | 0.09706  | 20.3  |
| 2198   | 2016 | -0.75 | 0.05 | 0.924189 | 0.85412541 | 20.8179  | 0.056019 | 11.44 |
| 2233   | 2016 | -0.19 | 0.05 | 0.924189 | 0.85412541 | 22.6304  | 0.09706  | 20.3  |
| 2198   | 2016 | -0.75 | 0.05 | 0.924189 | 0.85412541 | 20.8179  | 0.056019 | 11.44 |
| 603936 | 2016 | -0.19 | 0.05 | 0.924189 | 0.85412541 | 21.1319  | 0.057148 | 30.38 |
| 2198   | 2016 | -0.75 | 0.05 | 0.924189 | 0.85412541 | 20.8179  | 0.056019 | 11.44 |
| 2233   | 2016 | -0.19 | 0.05 | 0.924189 | 0.85412541 | 22.6304  | 0.09706  | 20.3  |
| 2288   | 2016 | -0.1  | 0.05 | 0.924189 | 0.85412541 | 21.54396 | -0.05276 | 18.32 |
| 603936 | 2016 | -0.01 | 0.05 | 0.924189 | 0.85412541 | 21.377   | 0.057148 | 30.38 |
| 603936 | 2016 | 0.327 | 0.05 | 0.924189 | 0.85412541 | 21.377   | 0.057148 | 30.38 |
| 603936 | 2016 | -0.01 | 0.05 | 0.924189 | 0.85412541 | 21.377   | 0.057148 | 30.38 |
| 2288   | 2016 | -0.74 | 0.05 | 0.924189 | 0.85412541 | 21.54396 | -0.05276 | 18.32 |
| 2198   | 2016 | -0.75 | 0.05 | 0.924189 | 0.85412541 | 20.8179  | 0.056019 | 11.44 |
| 2233   | 2016 | -0.19 | 0.05 | 0.924189 | 0.85412541 | 22.6304  | 0.09706  | 20.3  |
| 2198   | 2016 | -0.75 | 0.05 | 0.924189 | 0.85412541 | 20.8179  | 0.056019 | 11.44 |
| 2198   | 2016 | -0.75 | 0.05 | 0.924189 | 0.85412541 | 20.51405 | 0.056019 | 11.44 |
| 603936 | 2016 | -0.19 | 0.05 | 0.924189 | 0.85412541 | 21.377   | 0.057148 | 30.38 |
| 2288   | 2016 | -0.66 | 0.05 | 0.924189 | 0.85412541 | 21.54396 | -0.05276 | 18.32 |
| 2288   | 2016 | -0.1  | 0.05 | 0.924189 | 0.85412541 | 21.34452 | -0.05276 | 18.32 |
| 2198   | 2016 | -0.75 | 0.05 | 0.924189 | 0.85412541 | 20.8179  | 0.056019 | 11.44 |
| 603936 | 2016 | 0.035 | 0.05 | 0.924189 | 0.85412541 | 21.377   | 0.057148 | 30.38 |
| 2233   | 2016 | -0.19 | 0.05 | 0.924189 | 0.85412541 | 22.36182 | 0.09706  | 20.3  |
| 2233   | 2016 | -0.19 | 0.05 | 0.924189 | 0.85412541 | 22.6304  | 0.09706  | 20.3  |
| 2288   | 2016 | -0.1  | 0.05 | 0.924189 | 0.85412541 | 21.54396 | -0.05276 | 18.32 |
| 600252 | 2016 | 0.556 | 0.04 | 1.800877 | 3.2431566  | 22.25934 | 0.091885 | 20.53 |
| 662    | 2016 | 1.082 | 0.04 | 1.800877 | 3.2431566  | 22.37365 | 0.065594 | 16.41 |
| 600252 | 2016 | 0.556 | 0.04 | 1.800877 | 3.2431566  | 22.59345 | 0.091885 | 20.53 |
| 600252 | 2016 | 0.556 | 0.04 | 1.800877 | 3.2431566  | 22.59345 | 0.091885 | 20.53 |
| 662    | 2016 | 1.082 | 0.04 | 1.800877 | 3.2431566  | 22.37365 | 0.065594 | 16.41 |
| 662    | 2016 | 1.082 | 0.04 | 1.800877 | 3.2431566  | 22.37365 | 0.065594 | 16.41 |
| 662    | 2016 | 1.082 | 0.04 | 1.800877 | 3.2431566  | 22.37365 | 0.065594 | 16.41 |
| 600252 | 2016 | 0.556 | 0.04 | 1.800877 | 3.2431566  | 22.59345 | 0.091885 | 20.53 |
| 662    | 2016 | 1.082 | 0.04 | 1.800877 | 3.2431566  | 22.47663 | 0.065594 | 16.41 |
| 2281   | 2016 | 0.742 | 0.05 | 0.926429 | 0.858271   | 22.29542 | 0.094016 | 45.43 |

|        |      |       |      |          |          |          |          |       |
|--------|------|-------|------|----------|----------|----------|----------|-------|
| 600498 | 2016 | 1.308 | 0.05 | 0.926429 | 0.858271 | 23.91467 | 0.099993 | 46.57 |
| 600993 | 2016 | -0.24 | 0.05 | 0.926429 | 0.858271 | 21.63825 | 0.115525 | 29.32 |
| 300184 | 2016 | -0.39 | 0.05 | 0.926429 | 0.858271 | 21.27819 | 0.036287 | 21.29 |
| 600998 | 2016 | -0.6  | 0.05 | 0.926429 | 0.858271 | 24.37984 | 0.075297 | 26.3  |
| 2414   | 2016 | 0.861 | 0.05 | 0.926429 | 0.858271 | 22.12513 | 0.021786 | 38.32 |
| 2377   | 2016 | 0.279 | 0.05 | 0.926429 | 0.858271 | 21.13224 | 0.011262 | 43.28 |
| 600879 | 2016 | -0.12 | 0.05 | 0.926429 | 0.858271 | 23.69785 | 0.057451 | 23.99 |
| 600345 | 2016 | 0.974 | 0.05 | 0.926429 | 0.858271 | 21.22678 | 0.044053 | 28.63 |
| 600345 | 2016 | 0.964 | 0.05 | 0.926429 | 0.858271 | 21.22678 | 0.044053 | 28.63 |
| 600068 | 2016 | -0.52 | 0.05 | 0.926429 | 0.858271 | 25.74206 | 0.091527 | 42.34 |
| 300161 | 2016 | 0.416 | 0.05 | 0.926429 | 0.858271 | 21.51803 | 0.003758 | 19.58 |
| 2281   | 2016 | 0.152 | 0.05 | 0.926429 | 0.858271 | 22.29542 | 0.094016 | 45.43 |
| 600079 | 2016 | -0.63 | 0.05 | 0.926429 | 0.858271 | 23.99767 | 0.090144 | 24.49 |
| 600079 | 2016 | 0.414 | 0.05 | 0.926429 | 0.858271 | 23.99767 | 0.090144 | 24.49 |
| 600345 | 2016 | 1.247 | 0.05 | 0.926429 | 0.858271 | 21.22678 | 0.044053 | 28.63 |
| 600068 | 2016 | -0.71 | 0.05 | 0.926429 | 0.858271 | 25.74206 | 0.091527 | 42.34 |
| 300018 | 2016 | 1.431 | 0.05 | 0.926429 | 0.858271 | 21.1921  | 0.074968 | 7.84  |
| 2414   | 2016 | 1.611 | 0.05 | 0.926429 | 0.858271 | 22.12513 | 0.021786 | 38.32 |
| 300018 | 2016 | 1.006 | 0.05 | 0.926429 | 0.858271 | 21.1921  | 0.074968 | 7.84  |
| 600885 | 2016 | -0.17 | 0.05 | 0.926429 | 0.858271 | 22.59472 | 0.178809 | 34.32 |
| 852    | 2016 | 0.276 | 0.05 | 0.926429 | 0.858271 | 21.85119 | -0.4336  | 58.74 |
| 2194   | 2016 | 0.227 | 0.05 | 0.926429 | 0.858271 | 21.65957 | -0.08273 | 28.99 |
| 600079 | 2016 | -0.06 | 0.05 | 0.926429 | 0.858271 | 23.99767 | 0.090144 | 24.49 |
| 600068 | 2016 | -0.7  | 0.05 | 0.926429 | 0.858271 | 25.74206 | 0.091527 | 42.34 |
| 600068 | 2016 | -0.55 | 0.05 | 0.926429 | 0.858271 | 25.74206 | 0.091527 | 42.34 |
| 939    | 2016 | 0.261 | 0.05 | 0.926429 | 0.858271 | 24.45516 | 0.025709 | 28.47 |
| 600998 | 2016 | -0.71 | 0.05 | 0.926429 | 0.858271 | 24.37984 | 0.075297 | 26.3  |
| 600133 | 2016 | 0.377 | 0.05 | 0.926429 | 0.858271 | 22.58033 | 0.070411 | 21.45 |
| 600498 | 2016 | 0.519 | 0.05 | 0.926429 | 0.858271 | 23.91467 | 0.099993 | 46.57 |
| 600079 | 2016 | 0.695 | 0.05 | 0.926429 | 0.858271 | 23.99767 | 0.090144 | 24.49 |
| 939    | 2016 | 0.261 | 0.05 | 0.926429 | 0.858271 | 24.45516 | 0.025709 | 28.47 |
| 600498 | 2016 | 0.575 | 0.05 | 0.926429 | 0.858271 | 23.81512 | 0.099993 | 46.57 |
| 600879 | 2016 | 0.022 | 0.05 | 0.926429 | 0.858271 | 23.69785 | 0.057451 | 23.99 |
| 300323 | 2016 | 0.564 | 0.05 | 0.926429 | 0.858271 | 22.65233 | 0.077305 | 13.57 |
| 600998 | 2016 | -0.6  | 0.05 | 0.926429 | 0.858271 | 24.37984 | 0.075297 | 26.3  |
| 852    | 2016 | 0.219 | 0.05 | 0.926429 | 0.858271 | 22.59816 | -0.4336  | 58.74 |
| 988    | 2016 | 0.389 | 0.05 | 0.926429 | 0.858271 | 22.44372 | 0.073051 | 32.36 |
| 300054 | 2016 | 0.221 | 0.05 | 0.926429 | 0.858271 | 21.81774 | 0.104642 | 16.93 |
| 600079 | 2016 | 0.695 | 0.05 | 0.926429 | 0.858271 | 23.99767 | 0.090144 | 24.49 |
| 600976 | 2016 | -0.21 | 0.05 | 0.926429 | 0.858271 | 21.31538 | 0.063087 | 22.07 |
| 600993 | 2016 | -0.24 | 0.05 | 0.926429 | 0.858271 | 21.63825 | 0.115525 | 29.32 |
| 939    | 2016 | -0.1  | 0.05 | 0.926429 | 0.858271 | 24.22116 | 0.025709 | 28.47 |
| 600498 | 2016 | 1.034 | 0.05 | 0.926429 | 0.858271 | 23.91467 | 0.099993 | 46.57 |
| 300205 | 2016 | 0.881 | 0.05 | 0.926429 | 0.858271 | 21.34864 | 0.0041   | 26.14 |
| 300161 | 2016 | 1.074 | 0.05 | 0.926429 | 0.858271 | 21.51803 | 0.003758 | 19.58 |
| 300018 | 2016 | 1.106 | 0.05 | 0.926429 | 0.858271 | 21.07248 | 0.074968 | 7.84  |
| 600079 | 2016 | 0.008 | 0.05 | 0.926429 | 0.858271 | 23.99767 | 0.090144 | 24.49 |
| 852    | 2016 | 0.276 | 0.05 | 0.926429 | 0.858271 | 22.59816 | -0.4336  | 58.74 |
| 600345 | 2016 | 0.848 | 0.05 | 0.926429 | 0.858271 | 21.22678 | 0.044053 | 28.63 |
| 600993 | 2016 | -0.24 | 0.05 | 0.926429 | 0.858271 | 21.63825 | 0.115525 | 29.32 |
| 300184 | 2016 | -0.33 | 0.05 | 0.926429 | 0.858271 | 21.27819 | 0.036287 | 21.29 |
| 600879 | 2016 | 0.022 | 0.05 | 0.926429 | 0.858271 | 23.69785 | 0.057451 | 23.99 |
| 600079 | 2016 | 0.237 | 0.05 | 0.926429 | 0.858271 | 23.99767 | 0.090144 | 24.49 |
| 600345 | 2016 | 1.179 | 0.05 | 0.926429 | 0.858271 | 21.22678 | 0.044053 | 28.63 |

|        |      |       |      |          |          |          |          |       |
|--------|------|-------|------|----------|----------|----------|----------|-------|
| 600879 | 2016 | 0.022 | 0.05 | 0.926429 | 0.858271 | 23.69785 | 0.057451 | 23.99 |
| 600079 | 2016 | 0.414 | 0.05 | 0.926429 | 0.858271 | 23.99767 | 0.090144 | 24.49 |
| 600355 | 2016 | 1.339 | 0.05 | 0.926429 | 0.858271 | 20.16974 | 0.027627 | 12.19 |
| 600498 | 2016 | 1.512 | 0.05 | 0.926429 | 0.858271 | 23.91467 | 0.099993 | 46.57 |
| 300161 | 2016 | 1.741 | 0.05 | 0.926429 | 0.858271 | 21.51803 | 0.003758 | 19.58 |
| 600068 | 2016 | -0.66 | 0.05 | 0.926429 | 0.858271 | 25.74206 | 0.091527 | 42.34 |
| 988    | 2016 | 0.082 | 0.05 | 0.926429 | 0.858271 | 22.44372 | 0.073051 | 32.36 |
| 600068 | 2016 | -0.51 | 0.05 | 0.926429 | 0.858271 | 25.74206 | 0.091527 | 42.34 |
| 600355 | 2016 | 0.897 | 0.05 | 0.926429 | 0.858271 | 20.17534 | 0.027627 | 12.19 |
| 600345 | 2016 | 0.987 | 0.05 | 0.926429 | 0.858271 | 21.22678 | 0.044053 | 28.63 |
| 600355 | 2016 | 1.339 | 0.05 | 0.926429 | 0.858271 | 20.17534 | 0.027627 | 12.19 |
| 600681 | 2016 | -0.45 | 0.05 | 0.926429 | 0.858271 | 21.95454 | 0.258555 | 39.94 |
| 600345 | 2016 | 0.585 | 0.05 | 0.926429 | 0.858271 | 21.22678 | 0.044053 | 28.63 |
| 300054 | 2016 | 0.635 | 0.05 | 0.926429 | 0.858271 | 21.53139 | 0.104642 | 16.93 |
| 988    | 2016 | -0.38 | 0.05 | 0.926429 | 0.858271 | 22.44372 | 0.073051 | 32.36 |
| 2281   | 2016 | 0.833 | 0.05 | 0.926429 | 0.858271 | 22.17412 | 0.094016 | 45.43 |
| 600355 | 2016 | 0.897 | 0.05 | 0.926429 | 0.858271 | 20.17534 | 0.027627 | 12.19 |
| 600879 | 2016 | 0.022 | 0.05 | 0.926429 | 0.858271 | 23.69785 | 0.057451 | 23.99 |
| 600079 | 2016 | 0.695 | 0.05 | 0.926429 | 0.858271 | 23.99767 | 0.090144 | 24.49 |
| 600879 | 2016 | 0.022 | 0.05 | 0.926429 | 0.858271 | 23.69785 | 0.057451 | 23.99 |
| 600885 | 2016 | -0.12 | 0.05 | 0.926429 | 0.858271 | 22.59472 | 0.178809 | 34.32 |
| 300184 | 2016 | 0.028 | 0.05 | 0.926429 | 0.858271 | 21.27819 | 0.036287 | 21.29 |
| 600976 | 2016 | -0.21 | 0.05 | 0.926429 | 0.858271 | 21.31538 | 0.063087 | 22.07 |
| 988    | 2016 | 0.4   | 0.05 | 0.926429 | 0.858271 | 22.44372 | 0.073051 | 32.36 |
| 300054 | 2016 | 0.978 | 0.05 | 0.926429 | 0.858271 | 21.81774 | 0.104642 | 16.93 |
| 600079 | 2016 | -0.63 | 0.05 | 0.926429 | 0.858271 | 23.99767 | 0.090144 | 24.49 |
| 300220 | 2016 | -0.25 | 0.05 | 0.926429 | 0.858271 | 20.10336 | 0.016708 | 50.42 |
| 300161 | 2016 | 0.853 | 0.05 | 0.926429 | 0.858271 | 21.51803 | 0.003758 | 19.58 |
| 300205 | 2016 | 0.854 | 0.05 | 0.926429 | 0.858271 | 21.23019 | 0.0041   | 26.14 |
| 2194   | 2016 | -0.23 | 0.05 | 0.926429 | 0.858271 | 21.65957 | -0.08273 | 28.99 |
| 2194   | 2016 | -0.2  | 0.05 | 0.926429 | 0.858271 | 21.65957 | -0.08273 | 28.99 |
| 600345 | 2016 | 1.247 | 0.05 | 0.926429 | 0.858271 | 21.22678 | 0.044053 | 28.63 |
| 600079 | 2016 | 0.695 | 0.05 | 0.926429 | 0.858271 | 23.99767 | 0.090144 | 24.49 |
| 600133 | 2016 | 0.377 | 0.05 | 0.926429 | 0.858271 | 23.75474 | 0.070411 | 21.45 |
| 988    | 2016 | 0.442 | 0.05 | 0.926429 | 0.858271 | 22.44372 | 0.073051 | 32.36 |
| 600133 | 2016 | 0.377 | 0.05 | 0.926429 | 0.858271 | 22.58033 | 0.070411 | 21.45 |
| 600681 | 2016 | -0.45 | 0.05 | 0.926429 | 0.858271 | 22.29048 | 0.258555 | 39.94 |
| 300220 | 2016 | 0.022 | 0.05 | 0.926429 | 0.858271 | 20.10336 | 0.016708 | 50.42 |
| 600079 | 2016 | 0.695 | 0.05 | 0.926429 | 0.858271 | 23.99767 | 0.090144 | 24.49 |
| 300054 | 2016 | 0.463 | 0.05 | 0.926429 | 0.858271 | 21.81774 | 0.104642 | 16.93 |
| 600079 | 2016 | -0.63 | 0.05 | 0.926429 | 0.858271 | 23.99767 | 0.090144 | 24.49 |
| 300054 | 2016 | 0.292 | 0.05 | 0.926429 | 0.858271 | 21.81774 | 0.104642 | 16.93 |
| 600879 | 2016 | 0.541 | 0.05 | 0.926429 | 0.858271 | 22.92206 | 0.057451 | 23.99 |
| 600976 | 2016 | 0.556 | 0.05 | 0.926429 | 0.858271 | 21.31538 | 0.063087 | 22.07 |
| 600079 | 2016 | 0.389 | 0.05 | 0.926429 | 0.858271 | 23.99767 | 0.090144 | 24.49 |
| 600079 | 2016 | 0.695 | 0.05 | 0.926429 | 0.858271 | 23.99767 | 0.090144 | 24.49 |
| 300054 | 2016 | -0.18 | 0.05 | 0.926429 | 0.858271 | 21.81774 | 0.104642 | 16.93 |
| 600068 | 2016 | -0.78 | 0.05 | 0.926429 | 0.858271 | 25.74206 | 0.091527 | 42.34 |
| 600498 | 2016 | 0.925 | 0.05 | 0.926429 | 0.858271 | 23.91467 | 0.099993 | 46.57 |
| 600079 | 2016 | -0.63 | 0.05 | 0.926429 | 0.858271 | 23.99767 | 0.090144 | 24.49 |
| 988    | 2016 | -0.38 | 0.05 | 0.926429 | 0.858271 | 22.44372 | 0.073051 | 32.36 |
| 600879 | 2016 | 0.022 | 0.05 | 0.926429 | 0.858271 | 23.69785 | 0.057451 | 23.99 |
| 665    | 2016 | -0.04 | 0.05 | 0.926429 | 0.858271 | 22.81754 | 0.05166  | 13.16 |
| 600345 | 2016 | 0.964 | 0.05 | 0.926429 | 0.858271 | 21.22678 | 0.044053 | 28.63 |

|        |      |       |      |          |          |          |          |       |
|--------|------|-------|------|----------|----------|----------|----------|-------|
| 600068 | 2016 | -0.65 | 0.05 | 0.926429 | 0.858271 | 25.74206 | 0.091527 | 42.34 |
| 600879 | 2016 | 0.349 | 0.05 | 0.926429 | 0.858271 | 23.69785 | 0.057451 | 23.99 |
| 600068 | 2016 | -0.32 | 0.05 | 0.926429 | 0.858271 | 25.74206 | 0.091527 | 42.34 |
| 600079 | 2016 | 0.695 | 0.05 | 0.926429 | 0.858271 | 23.99767 | 0.090144 | 24.49 |
| 600498 | 2016 | 1.512 | 0.05 | 0.926429 | 0.858271 | 23.91467 | 0.099993 | 46.57 |
| 600998 | 2016 | -0.6  | 0.05 | 0.926429 | 0.858271 | 24.37984 | 0.075297 | 26.3  |
| 600885 | 2016 | -0.43 | 0.05 | 0.926429 | 0.858271 | 22.59472 | 0.178809 | 34.32 |
| 600068 | 2016 | -0.15 | 0.05 | 0.926429 | 0.858271 | 25.74206 | 0.091527 | 42.34 |
| 600879 | 2016 | -0.45 | 0.05 | 0.926429 | 0.858271 | 23.69785 | 0.057451 | 23.99 |
| 600498 | 2016 | 0.187 | 0.05 | 0.926429 | 0.858271 | 23.91467 | 0.099993 | 46.57 |
| 600068 | 2016 | -0.46 | 0.05 | 0.926429 | 0.858271 | 25.74206 | 0.091527 | 42.34 |
| 600133 | 2016 | -0.06 | 0.05 | 0.926429 | 8.58E-01 | 22.58033 | 0.070411 | 21.45 |
| 300323 | 2016 | 0.47  | 0.05 | 0.926429 | 8.58E-01 | 22.65233 | 0.077305 | 13.57 |
| 600885 | 2016 | -0.27 | 0.05 | 0.926429 | 8.58E-01 | 22.59472 | 0.178809 | 34.32 |
| 600879 | 2016 | -0.78 | 0.05 | 0.926429 | 8.58E-01 | 23.69785 | 0.057451 | 23.99 |
| 600079 | 2016 | 0.695 | 0.05 | 0.926429 | 8.58E-01 | 23.99767 | 0.090144 | 24.49 |
| 2281   | 2016 | 0.742 | 0.05 | 0.926429 | 8.58E-01 | 22.29542 | 0.094016 | 45.43 |
| 988    | 2016 | -0.38 | 0.05 | 0.926429 | 0.858271 | 21.79097 | 0.073051 | 32.36 |
| 600355 | 2016 | 0.897 | 0.05 | 0.926429 | 0.858271 | 20.17534 | 0.027627 | 12.19 |
| 600079 | 2016 | 0.695 | 0.05 | 0.926429 | 0.858271 | 23.99767 | 0.090144 | 24.49 |
| 600885 | 2016 | 0.515 | 0.05 | 0.926429 | 0.858271 | 22.59472 | 0.178809 | 34.32 |
| 600133 | 2016 | -0.95 | 0.05 | 0.926429 | 0.858271 | 22.58033 | 0.070411 | 21.45 |
| 852    | 2016 | 0.304 | 0.05 | 0.926429 | 0.858271 | 22.59816 | -0.4336  | 58.74 |
| 852    | 2016 | 0.219 | 0.05 | 0.926429 | 0.858271 | 22.59816 | -0.4336  | 58.74 |
| 600133 | 2016 | 0.377 | 0.05 | 0.926429 | 0.858271 | 22.58033 | 0.070411 | 21.45 |
| 988    | 2016 | -0.02 | 0.05 | 0.926429 | 0.858271 | 22.44372 | 0.073051 | 32.36 |
| 300161 | 2016 | 1.079 | 0.05 | 0.926429 | 0.858271 | 21.51803 | 0.003758 | 19.58 |
| 600345 | 2016 | 0.964 | 0.05 | 0.926429 | 0.858271 | 21.06389 | 0.044053 | 28.63 |
| 2281   | 2016 | 0.833 | 0.05 | 0.926429 | 0.858271 | 22.29542 | 0.094016 | 45.43 |
| 600998 | 2016 | -0.54 | 0.05 | 0.926429 | 0.858271 | 24.37984 | 0.075297 | 26.3  |
| 600079 | 2016 | 0.695 | 0.05 | 0.926429 | 0.858271 | 23.99767 | 0.090144 | 24.49 |
| 600136 | 2016 | -0.75 | 0.05 | 0.926429 | 0.858271 | 21.81967 | 0.059503 | 16.47 |
| 600133 | 2016 | -0.57 | 0.05 | 0.926429 | 0.858271 | 22.58033 | 0.070411 | 21.45 |
| 600355 | 2016 | 0.897 | 0.05 | 0.926429 | 0.858271 | 20.17534 | 0.027627 | 12.19 |
| 600879 | 2016 | -0.12 | 0.05 | 0.926429 | 0.858271 | 23.69785 | 0.057451 | 23.99 |
| 300184 | 2016 | -0.33 | 0.05 | 0.926429 | 0.858271 | 21.27819 | 0.036287 | 21.29 |
| 852    | 2016 | 0.017 | 0.05 | 0.926429 | 0.858271 | 22.59816 | -0.4336  | 58.74 |
| 600345 | 2016 | 0.899 | 0.05 | 0.926429 | 0.858271 | 21.22678 | 0.044053 | 28.63 |
| 600079 | 2016 | 0.695 | 0.05 | 0.926429 | 0.858271 | 23.99767 | 0.090144 | 24.49 |
| 600998 | 2016 | -0.6  | 0.05 | 0.926429 | 0.858271 | 24.37984 | 0.075297 | 26.3  |
| 2281   | 2016 | 0.591 | 0.05 | 0.926429 | 0.858271 | 22.29542 | 0.094016 | 45.43 |
| 988    | 2016 | 0.08  | 0.05 | 0.926429 | 0.858271 | 22.44372 | 0.073051 | 32.36 |
| 300018 | 2016 | 1.186 | 0.05 | 0.926429 | 0.858271 | 21.1921  | 0.074968 | 7.84  |
| 600498 | 2016 | 1.205 | 0.05 | 0.926429 | 0.858271 | 23.91467 | 0.099993 | 46.57 |
| 600976 | 2016 | 0.556 | 0.05 | 0.926429 | 0.858271 | 21.31538 | 0.063087 | 22.07 |
| 600345 | 2016 | 0.964 | 0.05 | 0.926429 | 0.858271 | 21.22678 | 0.044053 | 28.63 |
| 988    | 2016 | 0.258 | 0.05 | 0.926429 | 0.858271 | 22.44372 | 0.073051 | 32.36 |
| 600885 | 2016 | -0.59 | 0.05 | 0.926429 | 0.858271 | 22.59472 | 0.178809 | 34.32 |
| 600068 | 2016 | -0.32 | 0.05 | 0.926429 | 0.858271 | 25.74206 | 0.091527 | 42.34 |
| 600355 | 2016 | 0.897 | 0.05 | 0.926429 | 0.858271 | 20.17534 | 0.027627 | 12.19 |
| 300018 | 2016 | 1.848 | 0.05 | 0.926429 | 0.858271 | 21.1921  | 0.074968 | 7.84  |
| 2194   | 2016 | 0.227 | 0.05 | 0.926429 | 0.858271 | 21.65957 | -0.08273 | 28.99 |
| 300323 | 2016 | 0.378 | 0.05 | 0.926429 | 0.858271 | 22.65233 | 0.077305 | 13.57 |
| 600885 | 2016 | 0.515 | 0.05 | 0.926429 | 0.858271 | 22.59472 | 0.178809 | 34.32 |

|        |      |       |      |          |          |          |          |       |
|--------|------|-------|------|----------|----------|----------|----------|-------|
| 600498 | 2016 | 0.187 | 0.05 | 0.926429 | 0.858271 | 23.91467 | 0.099993 | 46.57 |
| 600133 | 2016 | -0.95 | 0.05 | 0.926429 | 0.858271 | 22.58033 | 0.070411 | 21.45 |
| 939    | 2016 | 0.261 | 0.05 | 0.926429 | 0.858271 | 24.45516 | 0.025709 | 28.47 |
| 300161 | 2016 | 0.681 | 0.05 | 0.926429 | 0.858271 | 21.51803 | 0.003758 | 19.58 |
| 300161 | 2016 | 0.416 | 0.05 | 0.926429 | 0.858271 | 21.51803 | 0.003758 | 19.58 |
| 300220 | 2016 | -0.47 | 0.05 | 0.926429 | 0.858271 | 20.10336 | 0.016708 | 50.42 |
| 300161 | 2016 | 0.776 | 0.05 | 0.926429 | 0.858271 | 21.51803 | 0.003758 | 19.58 |
| 600998 | 2016 | -0.54 | 0.05 | 0.926429 | 0.858271 | 24.37984 | 0.075297 | 26.3  |
| 600498 | 2016 | 0.623 | 0.05 | 0.926429 | 0.858271 | 23.91467 | 0.099993 | 46.57 |
| 2414   | 2016 | 0.62  | 0.05 | 0.926429 | 0.858271 | 22.12513 | 0.021786 | 38.32 |
| 600498 | 2016 | 0.825 | 0.05 | 0.926429 | 0.858271 | 23.91467 | 0.099993 | 46.57 |
| 600885 | 2016 | -0.2  | 0.05 | 0.926429 | 0.858271 | 22.02268 | 0.178809 | 34.32 |
| 600498 | 2016 | 1.205 | 0.05 | 0.926429 | 0.858271 | 23.91467 | 0.099993 | 46.57 |
| 665    | 2016 | -0.04 | 0.05 | 0.926429 | 0.858271 | 22.81754 | 0.05166  | 13.16 |
| 600885 | 2016 | -0.17 | 0.05 | 0.926429 | 0.858271 | 22.59472 | 0.178809 | 34.32 |
| 300220 | 2016 | 0.163 | 0.05 | 0.926429 | 0.858271 | 20.10336 | 0.016708 | 50.42 |
| 2194   | 2016 | 0.227 | 0.05 | 0.926429 | 0.858271 | 21.69106 | -0.08273 | 28.99 |
| 852    | 2016 | 0.157 | 0.05 | 0.926429 | 0.858271 | 22.59816 | -0.4336  | 58.74 |
| 300220 | 2016 | -0.25 | 0.05 | 0.926429 | 0.858271 | 20.10336 | 0.016708 | 50.42 |
| 300323 | 2016 | 0.378 | 0.05 | 0.926429 | 0.858271 | 22.65233 | 0.077305 | 13.57 |
| 600879 | 2016 | 0.022 | 0.05 | 0.926429 | 0.858271 | 23.69785 | 0.057451 | 23.99 |
| 300220 | 2016 | -0.47 | 0.05 | 0.926429 | 0.858271 | 20.10336 | 0.016708 | 50.42 |
| 600998 | 2016 | 0.39  | 0.05 | 0.926429 | 0.858271 | 24.37984 | 0.075297 | 26.3  |
| 600993 | 2016 | -0.82 | 0.05 | 0.926429 | 0.858271 | 21.50678 | 0.115525 | 29.32 |
| 600079 | 2016 | 0.695 | 0.05 | 0.926429 | 0.858271 | 23.99767 | 0.090144 | 24.49 |
| 600068 | 2016 | -0.7  | 0.05 | 0.926429 | 0.858271 | 25.74206 | 0.091527 | 42.34 |
| 300323 | 2016 | 0.455 | 0.05 | 0.926429 | 0.858271 | 22.65233 | 0.077305 | 13.57 |
| 600993 | 2016 | -0.24 | 0.05 | 0.926429 | 0.858271 | 21.63825 | 0.115525 | 29.32 |
| 600885 | 2016 | -0.1  | 0.05 | 0.926429 | 0.858271 | 22.59472 | 0.178809 | 34.32 |
| 600068 | 2016 | -0.58 | 0.05 | 0.926429 | 0.858271 | 25.1354  | 0.091527 | 42.34 |
| 600079 | 2016 | 0.087 | 0.05 | 0.926429 | 0.858271 | 23.99767 | 0.090144 | 24.49 |
| 600079 | 2016 | -0.63 | 0.05 | 0.926429 | 0.858271 | 23.99767 | 0.090144 | 24.49 |
| 988    | 2016 | 0.336 | 0.05 | 0.926429 | 0.858271 | 22.44372 | 0.073051 | 32.36 |
| 300220 | 2016 | -0.23 | 0.05 | 0.926429 | 0.858271 | 20.10336 | 0.016708 | 50.42 |
| 600885 | 2016 | -0.15 | 0.05 | 0.926429 | 0.858271 | 22.59472 | 0.178809 | 34.32 |
| 600498 | 2016 | 0.965 | 0.05 | 0.926429 | 0.858271 | 23.91467 | 0.099993 | 46.57 |
| 2377   | 2016 | 0.102 | 0.05 | 0.926429 | 0.858271 | 20.90452 | 0.011262 | 43.28 |
| 665    | 2016 | -0.04 | 0.05 | 0.926429 | 0.858271 | 22.79476 | 0.05166  | 13.16 |
| 300323 | 2016 | 0.105 | 0.05 | 0.926429 | 0.858271 | 22.19886 | 0.077305 | 13.57 |
| 600976 | 2016 | -0.21 | 0.05 | 0.926429 | 0.858271 | 21.31538 | 0.063087 | 22.07 |
| 300161 | 2016 | 0.891 | 0.05 | 0.926429 | 0.858271 | 21.51803 | 0.003758 | 19.58 |
| 600998 | 2016 | -0.93 | 0.05 | 0.926429 | 0.858271 | 23.91843 | 0.075297 | 26.3  |
| 600885 | 2016 | 0.515 | 0.05 | 0.926429 | 0.858271 | 22.59472 | 0.178809 | 34.32 |
| 2377   | 2016 | 0.279 | 0.05 | 0.926429 | 0.858271 | 21.13224 | 0.011262 | 43.28 |
| 600079 | 2016 | 0.695 | 0.05 | 0.926429 | 0.858271 | 23.99767 | 0.090144 | 24.49 |
| 300184 | 2016 | -0.33 | 0.05 | 0.926429 | 0.858271 | 21.27819 | 0.036287 | 21.29 |
| 300161 | 2016 | 1.079 | 0.05 | 0.926429 | 0.858271 | 21.51803 | 0.003758 | 19.58 |
| 300161 | 2016 | 1.334 | 0.05 | 0.926429 | 0.858271 | 21.51803 | 0.003758 | 19.58 |
| 600068 | 2016 | -0.82 | 0.05 | 0.926429 | 0.858271 | 25.74206 | 0.091527 | 42.34 |
| 600879 | 2016 | 0.022 | 0.05 | 0.926429 | 0.858271 | 23.69785 | 0.057451 | 23.99 |
| 600998 | 2016 | -0.6  | 0.05 | 0.926429 | 0.858271 | 24.37984 | 0.075297 | 26.3  |
| 600993 | 2016 | -0.82 | 0.05 | 0.926429 | 0.858271 | 21.63825 | 0.115525 | 29.32 |
| 300018 | 2016 | 1     | 0.05 | 0.926429 | 0.858271 | 21.1921  | 0.074968 | 7.84  |
| 2414   | 2016 | 0.861 | 0.05 | 0.926429 | 0.858271 | 22.12513 | 0.021786 | 38.32 |



|        |      |       |      |          |          |          |          |       |
|--------|------|-------|------|----------|----------|----------|----------|-------|
| 600133 | 2016 | -0.95 | 0.05 | 0.926429 | 0.858271 | 22.58033 | 0.070411 | 21.45 |
| 939    | 2016 | -0.1  | 0.05 | 0.926429 | 0.858271 | 24.45516 | 0.025709 | 28.47 |
| 600998 | 2016 | -0.6  | 0.05 | 0.926429 | 0.858271 | 24.37984 | 0.075297 | 26.3  |
| 600068 | 2016 | -0.86 | 0.05 | 0.926429 | 0.858271 | 25.74206 | 0.091527 | 42.34 |
| 600136 | 2016 | -0.75 | 0.05 | 0.926429 | 0.858271 | 21.99863 | 0.059503 | 16.47 |
| 600079 | 2016 | 0.695 | 0.05 | 0.926429 | 0.858271 | 23.99767 | 0.090144 | 24.49 |
| 2414   | 2016 | 0.861 | 0.05 | 0.926429 | 0.858271 | 22.07332 | 0.021786 | 38.32 |
| 600998 | 2016 | -0.69 | 0.05 | 0.926429 | 0.858271 | 24.37984 | 0.075297 | 26.3  |
| 600998 | 2016 | -0.6  | 0.05 | 0.926429 | 0.858271 | 24.37984 | 0.075297 | 26.3  |
| 600879 | 2016 | 0.366 | 0.05 | 0.926429 | 0.858271 | 23.69785 | 0.057451 | 23.99 |
| 300054 | 2016 | 0.578 | 0.05 | 0.926429 | 0.858271 | 21.81774 | 0.104642 | 16.93 |
| 600885 | 2016 | 0.515 | 0.05 | 0.926429 | 0.858271 | 22.59472 | 0.178809 | 34.32 |
| 600885 | 2016 | -0.59 | 0.05 | 0.926429 | 0.858271 | 22.59472 | 0.178809 | 34.32 |
| 600885 | 2016 | -0.2  | 0.05 | 0.926429 | 0.858271 | 22.59472 | 0.178809 | 34.32 |
| 2377   | 2016 | -0.12 | 0.05 | 0.926429 | 0.858271 | 21.13224 | 0.011262 | 43.28 |
| 600068 | 2016 | -0.37 | 0.05 | 0.926429 | 0.858271 | 25.74206 | 0.091527 | 42.34 |
| 300054 | 2016 | -0.02 | 0.05 | 0.926429 | 0.858271 | 21.81774 | 0.104642 | 16.93 |
| 600498 | 2016 | 0.187 | 0.05 | 0.926429 | 0.858271 | 23.91467 | 0.099993 | 46.57 |
| 2377   | 2016 | -0.12 | 0.05 | 0.926429 | 0.858271 | 21.13224 | 0.011262 | 43.28 |
| 600998 | 2016 | -0.27 | 0.05 | 0.926429 | 0.858271 | 24.37984 | 0.075297 | 26.3  |
| 600498 | 2016 | 0.549 | 0.05 | 0.926429 | 0.858271 | 23.91467 | 0.099993 | 46.57 |
| 600976 | 2016 | -0.21 | 0.05 | 0.926429 | 0.858271 | 21.31538 | 0.063087 | 22.07 |
| 600879 | 2016 | -0.07 | 0.05 | 0.926429 | 0.858271 | 23.69785 | 0.057451 | 23.99 |
| 600068 | 2016 | -0.5  | 0.05 | 0.926429 | 0.858271 | 25.74206 | 0.091527 | 42.34 |
| 600355 | 2016 | 1.138 | 0.05 | 0.926429 | 0.858271 | 20.17534 | 0.027627 | 12.19 |
| 600993 | 2016 | -0.24 | 0.05 | 0.926429 | 0.858271 | 21.63825 | 0.115525 | 29.32 |
| 988    | 2016 | -0.05 | 0.05 | 0.926429 | 0.858271 | 22.44372 | 0.073051 | 32.36 |
| 600885 | 2016 | -0.59 | 0.05 | 0.926429 | 0.858271 | 22.59472 | 0.178809 | 34.32 |
| 600079 | 2016 | 0.695 | 0.05 | 0.926429 | 0.858271 | 23.39371 | 0.090144 | 24.49 |
| 300184 | 2016 | -0.33 | 0.05 | 0.926429 | 0.858271 | 20.95257 | 0.036287 | 21.29 |
| 939    | 2016 | 0.162 | 0.05 | 0.926429 | 0.858271 | 24.45516 | 0.025709 | 28.47 |
| 300018 | 2016 | 0.788 | 0.05 | 0.926429 | 0.858271 | 21.1921  | 0.074968 | 7.84  |
| 300184 | 2016 | -0.33 | 0.05 | 0.926429 | 0.858271 | 21.27819 | 0.036287 | 21.29 |
| 939    | 2016 | 0.261 | 0.05 | 0.926429 | 0.858271 | 24.45516 | 0.025709 | 28.47 |
| 600998 | 2016 | -0.6  | 0.05 | 0.926429 | 0.858271 | 24.37984 | 0.075297 | 26.3  |
| 600079 | 2016 | -0.63 | 0.05 | 0.926429 | 0.858271 | 23.99767 | 0.090144 | 24.49 |
| 600879 | 2016 | -0.78 | 0.05 | 0.926429 | 0.858271 | 23.69785 | 0.057451 | 23.99 |
| 2194   | 2016 | -0.23 | 0.05 | 0.926429 | 0.858271 | 21.65957 | -0.08273 | 28.99 |
| 600885 | 2016 | 0.026 | 0.05 | 0.926429 | 0.858271 | 22.59472 | 0.178809 | 34.32 |
| 600885 | 2016 | -0.2  | 0.05 | 0.926429 | 0.858271 | 22.59472 | 0.178809 | 34.32 |
| 600079 | 2016 | 0.474 | 0.05 | 0.926429 | 0.858271 | 23.99767 | 0.090144 | 24.49 |
| 2281   | 2016 | 0.742 | 0.05 | 0.926429 | 0.858271 | 22.29542 | 0.094016 | 45.43 |
| 600345 | 2016 | 0.964 | 0.05 | 0.926429 | 0.858271 | 21.22678 | 0.044053 | 28.63 |
| 600998 | 2016 | -0.6  | 0.05 | 0.926429 | 0.858271 | 24.37984 | 0.075297 | 26.3  |
| 988    | 2016 | 0.072 | 0.05 | 0.926429 | 0.858271 | 22.44372 | 0.073051 | 32.36 |
| 600068 | 2016 | -0.6  | 0.05 | 0.926429 | 0.858271 | 25.74206 | 0.091527 | 42.34 |
| 852    | 2016 | 0.837 | 0.05 | 0.926429 | 0.858271 | 22.59816 | -0.4336  | 58.74 |
| 300323 | 2016 | -0.21 | 0.05 | 0.926429 | 0.858271 | 22.65233 | 0.077305 | 13.57 |
| 300018 | 2016 | 1.848 | 0.05 | 0.926429 | 0.858271 | 21.1921  | 0.074968 | 7.84  |
| 2194   | 2016 | 0.227 | 0.05 | 0.926429 | 0.858271 | 21.65957 | -0.08273 | 28.99 |
| 852    | 2016 | -0.49 | 0.05 | 0.926429 | 0.858271 | 22.59816 | -0.4336  | 58.74 |
| 300323 | 2016 | -0.53 | 0.05 | 0.926429 | 0.858271 | 22.65233 | 0.077305 | 13.57 |
| 600998 | 2016 | -0.93 | 0.05 | 0.926429 | 0.858271 | 24.37984 | 0.075297 | 26.3  |
| 600993 | 2016 | -0.24 | 0.05 | 0.926429 | 0.858271 | 21.63825 | 0.115525 | 29.32 |

|        |      |       |      |          |            |          |          |       |
|--------|------|-------|------|----------|------------|----------|----------|-------|
| 300018 | 2016 | 1.431 | 0.05 | 0.926429 | 0.858271   | 21.1921  | 0.074968 | 7.84  |
| 988    | 2016 | -0.38 | 0.05 | 0.926429 | 0.858271   | 22.44372 | 0.073051 | 32.36 |
| 852    | 2016 | -0.01 | 0.05 | 0.926429 | 0.858271   | 22.59816 | -0.4336  | 58.74 |
| 939    | 2016 | 0.261 | 0.05 | 0.926429 | 0.858271   | 24.45516 | 0.025709 | 28.47 |
| 600681 | 2016 | -0.45 | 0.05 | 0.926429 | 0.858271   | 21.95454 | 0.258555 | 39.94 |
| 2281   | 2016 | 0.71  | 0.05 | 0.926429 | 0.858271   | 22.29542 | 0.094016 | 45.43 |
| 600879 | 2016 | -0.62 | 0.05 | 0.926429 | 0.858271   | 23.69785 | 0.057451 | 23.99 |
| 2414   | 2016 | 1.859 | 0.05 | 0.926429 | 0.858271   | 22.12513 | 0.021786 | 38.32 |
| 300205 | 2016 | 1.036 | 0.05 | 0.926429 | 0.858271   | 21.23019 | 0.0041   | 26.14 |
| 300054 | 2016 | -0.18 | 0.05 | 0.926429 | 0.858271   | 21.81774 | 0.104642 | 16.93 |
| 300205 | 2016 | 1.036 | 0.05 | 0.926429 | 0.858271   | 21.23019 | 0.0041   | 26.14 |
| 600079 | 2016 | -0.63 | 0.05 | 0.926429 | 0.858271   | 23.99767 | 0.090144 | 24.49 |
| 2414   | 2016 | 1.218 | 0.05 | 0.926429 | 0.858271   | 22.12513 | 0.021786 | 38.32 |
| 600068 | 2016 | 0.021 | 0.05 | 0.926429 | 0.858271   | 25.74206 | 0.091527 | 42.34 |
| 600133 | 2016 | -0.95 | 0.05 | 0.926429 | 0.858271   | 22.58033 | 0.070411 | 21.45 |
| 300205 | 2016 | 0.881 | 0.05 | 0.926429 | 0.858271   | 21.23019 | 0.0041   | 26.14 |
| 600079 | 2016 | -0.03 | 0.05 | 0.926429 | 0.858271   | 23.99767 | 0.090144 | 24.49 |
| 300161 | 2016 | 1.334 | 0.05 | 0.926429 | 0.858271   | 21.51803 | 0.003758 | 19.58 |
| 300184 | 2016 | -0.33 | 0.05 | 0.926429 | 0.858271   | 21.27819 | 0.036287 | 21.29 |
| 600993 | 2016 | -0.39 | 0.05 | 0.926429 | 0.858271   | 21.63825 | 0.115525 | 29.32 |
| 300161 | 2016 | 0.892 | 0.05 | 0.926429 | 0.858271   | 21.51803 | 0.003758 | 19.58 |
| 600885 | 2016 | -0.42 | 0.05 | 0.926429 | 0.858271   | 22.59472 | 0.178809 | 34.32 |
| 600136 | 2016 | -0.75 | 0.05 | 0.926429 | 0.858271   | 21.81967 | 0.059503 | 16.47 |
| 600079 | 2016 | -0.63 | 0.05 | 0.926429 | 0.858271   | 23.99767 | 0.090144 | 24.49 |
| 300161 | 2016 | 0.657 | 0.05 | 0.926429 | 0.858271   | 21.29255 | 0.003758 | 19.58 |
| 300220 | 2016 | -0.06 | 0.05 | 0.926429 | 0.858271   | 20.10336 | 0.016708 | 50.42 |
| 600879 | 2016 | 0.07  | 0.05 | 0.926429 | 0.858271   | 23.69785 | 0.057451 | 23.99 |
| 300184 | 2016 | -0.33 | 0.05 | 0.926429 | 0.858271   | 21.27819 | 0.036287 | 21.29 |
| 988    | 2016 | 0.282 | 0.05 | 0.926429 | 0.858271   | 22.44372 | 0.073051 | 32.36 |
| 600885 | 2016 | -0.43 | 0.05 | 0.926429 | 0.858271   | 22.59472 | 0.178809 | 34.32 |
| 300220 | 2016 | -0.47 | 0.05 | 0.926429 | 0.858271   | 20.10336 | 0.016708 | 50.42 |
| 600976 | 2016 | -0.04 | 0.05 | 0.926429 | 0.858271   | 20.93762 | 0.063087 | 22.07 |
| 988    | 2016 | -0.38 | 0.05 | 0.926429 | 0.858271   | 22.44372 | 0.073051 | 32.36 |
| 300054 | 2016 | 0.115 | 0.05 | 0.926429 | 0.858271   | 21.81774 | 0.104642 | 16.93 |
| 300205 | 2016 | 0.854 | 0.05 | 0.926429 | 0.858271   | 21.23019 | 0.0041   | 26.14 |
| 600498 | 2016 | 0.982 | 0.05 | 0.926429 | 0.858271   | 23.91467 | 0.099993 | 46.57 |
| 2096   | 2016 | -0.73 | 0.04 | 0.112763 | 0.01271557 | 22.2179  | 0.018939 | 41.62 |
| 2096   | 2016 | -0.73 | 0.04 | 0.112763 | 0.01271557 | 22.2179  | 0.018939 | 41.62 |
| 2096   | 2016 | -0.73 | 0.04 | 0.112763 | 0.01271557 | 22.2179  | 0.018939 | 41.62 |
| 2096   | 2016 | -0.73 | 0.04 | 0.112763 | 0.01271557 | 21.9174  | 0.018939 | 41.62 |
| 2096   | 2016 | -0.73 | 0.04 | 0.112763 | 0.01271557 | 22.2179  | 0.018939 | 41.62 |
| 2096   | 2016 | -0.73 | 0.04 | 0.112763 | 0.01271557 | 22.2179  | 0.018939 | 41.62 |
| 300114 | 2016 | 0.601 | 0.03 | 1.208011 | 1.4592904  | 21.38306 | 0.085105 | 51.77 |
| 300114 | 2016 | 0.233 | 0.03 | 1.208011 | 1.4592904  | 21.38306 | 0.085105 | 51.77 |
| 300114 | 2016 | -0.16 | 0.03 | 1.208011 | 1.4592904  | 21.04569 | 0.085105 | 51.77 |
| 300114 | 2016 | -0.16 | 0.03 | 1.208011 | 1.4592904  | 21.38306 | 0.085105 | 51.77 |
| 300114 | 2016 | 0.233 | 0.03 | 1.208011 | 1.4592904  | 21.38306 | 0.085105 | 51.77 |
| 300114 | 2016 | 0.233 | 0.03 | 1.208011 | 1.4592904  | 21.38306 | 0.085105 | 51.77 |
| 300114 | 2016 | -0.12 | 0.03 | 1.208011 | 1.4592904  | 21.38306 | 0.085105 | 51.77 |
| 300114 | 2016 | 0.601 | 0.03 | 1.208011 | 1.4592904  | 21.38306 | 0.085105 | 51.77 |
| 300114 | 2016 | -0.1  | 0.03 | 1.208011 | 1.4592904  | 21.38306 | 0.085105 | 51.77 |
| 300057 | 2016 | -0.53 | 0.05 | 0.983319 | 0.9669168  | 22.24332 | 0.034288 | 41.9  |
| 300281 | 2016 | -0.36 | 0.05 | 0.983319 | 0.9669168  | 20.86201 | 0.041904 | 44.56 |
| 534    | 2016 | 0.036 | 0.05 | 0.983319 | 0.9669168  | 21.58018 | 0.050891 | 52.38 |

|        |      |       |      |          |           |          |          |       |
|--------|------|-------|------|----------|-----------|----------|----------|-------|
| 2292   | 2016 | 0.526 | 0.05 | 0.983319 | 0.9669168 | 22.84747 | 0.097577 | 44.33 |
| 150    | 2016 | -0.73 | 0.05 | 0.983319 | 0.9669168 | 22.69735 | 0.295861 | 37.08 |
| 300057 | 2016 | -0.42 | 0.05 | 0.983319 | 0.9669168 | 21.66372 | 0.034288 | 41.9  |
| 300043 | 2016 | -0.21 | 0.05 | 0.983319 | 0.9669168 | 22.35675 | 0.189213 | 32.77 |
| 2212   | 2016 | 0.647 | 0.05 | 0.983319 | 9.67E-01  | 22.91432 | 0.012717 | 54.63 |
| 2292   | 2016 | -0.18 | 0.05 | 0.983319 | 9.67E-01  | 22.84747 | 0.097577 | 44.33 |
| 2212   | 2016 | -0.68 | 0.05 | 0.983319 | 9.67E-01  | 22.91432 | 0.012717 | 54.63 |
| 2759   | 2016 | -0.5  | 0.05 | 0.983319 | 9.67E-01  | 21.97999 | 0.02306  | 27.22 |
| 300043 | 2016 | 0.927 | 0.05 | 0.983319 | 9.67E-01  | 22.35675 | 0.189213 | 32.77 |
| 600978 | 2016 | -0.5  | 0.05 | 0.983319 | 9.67E-01  | 23.31053 | 0.095417 | 24.85 |
| 300281 | 2016 | -0.14 | 0.05 | 0.983319 | 9.67E-01  | 20.86201 | 0.041904 | 44.56 |
| 2292   | 2016 | 0.085 | 0.05 | 0.983319 | 9.67E-01  | 22.84747 | 0.097577 | 44.33 |
| 600978 | 2016 | -0.57 | 0.05 | 0.983319 | 0.9669168 | 23.49429 | 0.095417 | 24.85 |
| 150    | 2016 | -0.73 | 0.05 | 0.983319 | 0.9669168 | 22.69735 | 0.295861 | 37.08 |
| 2502   | 2016 | 0.856 | 0.05 | 0.983319 | 0.9669168 | 22.00746 | 0.104806 | 26.89 |
| 300057 | 2016 | -0.63 | 0.05 | 0.983319 | 0.9669168 | 22.24332 | 0.034288 | 41.9  |
| 2433   | 2016 | -0.87 | 0.05 | 0.983319 | 0.9669168 | 22.65177 | 0.053326 | 32.63 |
| 300281 | 2016 | -0.45 | 0.05 | 0.983319 | 0.9669168 | 20.7011  | 0.041904 | 44.56 |
| 2502   | 2016 | 1.74  | 0.05 | 0.983319 | 0.9669168 | 22.00746 | 0.104806 | 26.89 |
| 2584   | 2016 | 0.105 | 0.05 | 0.983319 | 0.9669168 | 21.58723 | 0.050073 | 15.79 |
| 2584   | 2016 | 0.173 | 0.05 | 0.983319 | 0.9669168 | 21.58723 | 0.050073 | 15.79 |
| 600978 | 2016 | -0.57 | 0.05 | 0.983319 | 0.9669168 | 23.49429 | 0.095417 | 24.85 |
| 2433   | 2016 | -0.87 | 0.05 | 0.983319 | 0.9669168 | 22.65177 | 0.053326 | 32.63 |
| 823    | 2016 | -0.2  | 0.05 | 0.983319 | 0.9669168 | 22.27483 | 0.06969  | 30.31 |
| 300093 | 2016 | -0.54 | 0.05 | 0.983319 | 0.9669168 | 20.96946 | 0.005361 | 11.24 |
| 823    | 2016 | -0.64 | 0.05 | 0.983319 | 0.9669168 | 22.27483 | 0.06969  | 30.31 |
| 603398 | 2016 | -0.55 | 0.05 | 0.983319 | 0.9669168 | 20.24793 | 0.100709 | 30.6  |
| 300093 | 2016 | -0.54 | 0.05 | 0.983319 | 0.9669168 | 20.96946 | 0.005361 | 11.24 |
| 601515 | 2016 | -0.24 | 0.05 | 0.983319 | 0.9669168 | 22.48386 | 0.163248 | 54.4  |
| 300057 | 2016 | -0.37 | 0.05 | 0.983319 | 0.9669168 | 22.24332 | 0.034288 | 41.9  |
| 601515 | 2016 | -0.3  | 0.05 | 0.983319 | 0.9669168 | 22.48386 | 0.163248 | 54.4  |
| 601515 | 2016 | -0.52 | 0.05 | 0.983319 | 0.9669168 | 22.48386 | 0.163248 | 54.4  |
| 2433   | 2016 | -0.87 | 0.05 | 0.983319 | 0.9669168 | 22.65177 | 0.053326 | 32.63 |
| 2575   | 2016 | -0.55 | 0.05 | 0.983319 | 0.9669168 | 20.64538 | 0.014064 | 44.85 |
| 2292   | 2016 | 0.156 | 0.05 | 0.983319 | 0.9669168 | 22.84747 | 0.097577 | 44.33 |
| 534    | 2016 | -0.04 | 0.05 | 0.983319 | 0.9669168 | 21.58018 | 0.050891 | 52.38 |
| 300043 | 2016 | -0.4  | 0.05 | 0.983319 | 0.9669168 | 22.03867 | 0.189213 | 32.77 |
| 823    | 2016 | -0.2  | 0.05 | 0.983319 | 0.9669168 | 22.27483 | 0.06969  | 30.31 |
| 2292   | 2016 | -0.01 | 0.05 | 0.983319 | 0.9669168 | 22.84747 | 0.097577 | 44.33 |
| 2584   | 2016 | 0.836 | 0.05 | 0.983319 | 0.9669168 | 21.42202 | 0.050073 | 15.79 |
| 150    | 2016 | -0.73 | 0.05 | 0.983319 | 0.9669168 | 22.69735 | 0.302158 | 37.08 |
| 601515 | 2016 | -0.52 | 0.05 | 0.983319 | 0.9669168 | 22.17295 | 0.163248 | 54.4  |
| 2502   | 2016 | 1.74  | 0.05 | 0.983319 | 0.9669168 | 22.00746 | 0.104806 | 26.89 |
| 2759   | 2016 | -0.5  | 0.05 | 0.983319 | 0.9669168 | 21.97999 | 0.02306  | 27.22 |
| 601515 | 2016 | 0.142 | 0.05 | 0.983319 | 0.9669168 | 22.48386 | 0.163248 | 54.4  |
| 823    | 2016 | 0.682 | 0.05 | 0.983319 | 0.9669168 | 22.27483 | 0.06969  | 30.31 |
| 300057 | 2016 | -0.35 | 0.05 | 0.983319 | 0.9669168 | 22.24332 | 0.034288 | 41.9  |
| 2502   | 2016 | 0.856 | 0.05 | 0.983319 | 0.9669168 | 22.00746 | 0.104806 | 26.89 |
| 601515 | 2016 | 0.363 | 0.05 | 0.983319 | 0.9669168 | 22.48386 | 0.163248 | 54.4  |
| 2292   | 2016 | 0.35  | 0.05 | 0.983319 | 0.9669168 | 22.84747 | 0.097577 | 44.33 |
| 601515 | 2016 | -0.04 | 0.05 | 0.983319 | 0.9669168 | 22.48386 | 0.163248 | 54.4  |
| 600978 | 2016 | -0.6  | 0.05 | 0.983319 | 0.9669168 | 23.49429 | 0.095417 | 24.85 |
| 534    | 2016 | 0.009 | 0.05 | 0.983319 | 0.9669168 | 21.47175 | 0.050891 | 52.38 |
| 2575   | 2016 | -0.55 | 0.05 | 0.983319 | 0.9669168 | 20.64538 | 0.014064 | 44.85 |

|        |      |       |      |          |           |          |          |       |
|--------|------|-------|------|----------|-----------|----------|----------|-------|
| 823    | 2016 | -0.2  | 0.05 | 0.983319 | 0.9669168 | 22.27483 | 0.06969  | 30.31 |
| 300057 | 2016 | -0.4  | 0.05 | 0.983319 | 0.9669168 | 22.24332 | 0.034288 | 41.9  |
| 2441   | 2016 | -0.92 | 0.05 | 0.983319 | 0.9669168 | 22.05008 | 0.040562 | 29.32 |
| 600978 | 2016 | -0.81 | 0.05 | 0.983319 | 0.9669168 | 23.49429 | 0.095417 | 24.85 |
| 2575   | 2016 | -0.55 | 0.05 | 0.983319 | 0.9669168 | 20.6716  | 0.014064 | 44.85 |
| 601515 | 2016 | -0.19 | 0.05 | 0.983319 | 0.9669168 | 22.48386 | 0.163248 | 54.4  |
| 2584   | 2016 | 0.105 | 0.05 | 0.983319 | 0.9669168 | 21.58723 | 0.050073 | 15.79 |
| 2741   | 2016 | 0.369 | 0.05 | 0.983319 | 0.9669168 | 20.71874 | 0.07977  | 35.88 |
| 2759   | 2016 | -0.5  | 0.05 | 0.983319 | 0.9669168 | 21.94146 | 0.02306  | 27.22 |
| 2433   | 2016 | -0.87 | 0.05 | 0.983319 | 0.9669168 | 22.65177 | 0.053326 | 32.63 |
| 2741   | 2016 | 0.369 | 0.05 | 0.983319 | 0.9669168 | 20.71874 | 0.07977  | 35.88 |
| 300057 | 2016 | -0.35 | 0.05 | 0.983319 | 0.9669168 | 22.24332 | 0.034288 | 41.9  |
| 2584   | 2016 | 0.165 | 0.05 | 0.983319 | 0.9669168 | 21.58723 | 0.050073 | 15.79 |
| 2212   | 2016 | -0.68 | 0.05 | 0.983319 | 0.9669168 | 22.80857 | 0.012717 | 54.63 |
| 2212   | 2016 | 0.647 | 0.05 | 0.983319 | 0.9669168 | 22.91432 | 0.012717 | 54.63 |
| 2741   | 2016 | 0.369 | 0.05 | 0.983319 | 0.9669168 | 20.61036 | 0.07977  | 35.88 |
| 600978 | 2016 | -0.57 | 0.05 | 0.983319 | 0.9669168 | 23.49429 | 0.095417 | 24.85 |
| 2345   | 2016 | -0.78 | 0.05 | 0.983319 | 0.9669168 | 22.24352 | 0.071829 | 30.01 |
| 2292   | 2016 | 0.018 | 0.05 | 0.983319 | 0.9669168 | 22.84747 | 0.097577 | 44.33 |
| 2502   | 2016 | 0.636 | 0.05 | 0.983319 | 0.9669168 | 22.00746 | 0.104806 | 26.89 |
| 2345   | 2016 | -0.78 | 0.05 | 0.983319 | 0.9669168 | 22.18263 | 0.071829 | 30.01 |
| 601515 | 2016 | -0.01 | 0.05 | 0.983319 | 0.9669168 | 22.48386 | 0.163248 | 54.4  |
| 300043 | 2016 | -0.4  | 0.05 | 0.983319 | 0.9669168 | 22.35675 | 0.189213 | 32.77 |
| 300281 | 2016 | -0.14 | 0.05 | 0.983319 | 0.9669168 | 20.86201 | 0.041904 | 44.56 |
| 2292   | 2016 | 0.079 | 0.05 | 0.983319 | 0.9669168 | 22.84747 | 0.097577 | 44.33 |
| 300043 | 2016 | 0.542 | 0.05 | 0.983319 | 0.9669168 | 22.35675 | 0.189213 | 32.77 |
| 2212   | 2016 | 0.407 | 0.05 | 0.983319 | 0.9669168 | 22.91432 | 0.012717 | 54.63 |
| 300043 | 2016 | -0.4  | 0.05 | 0.983319 | 0.9669168 | 22.35675 | 0.189213 | 32.77 |
| 2292   | 2016 | 0.681 | 0.05 | 0.983319 | 0.9669168 | 22.84747 | 0.097577 | 44.33 |
| 2212   | 2016 | 0.1   | 0.05 | 0.983319 | 0.9669168 | 22.91432 | 0.012717 | 54.63 |
| 2433   | 2016 | -0.87 | 0.05 | 0.983319 | 0.9669168 | 22.65177 | 0.053326 | 32.63 |
| 2741   | 2016 | 0.369 | 0.05 | 0.983319 | 0.9669168 | 20.71874 | 0.07977  | 35.88 |
| 600978 | 2016 | -0.6  | 0.05 | 0.983319 | 0.9669168 | 23.49429 | 0.095417 | 24.85 |
| 300043 | 2016 | -0.21 | 0.05 | 0.983319 | 0.9669168 | 22.35675 | 0.189213 | 32.77 |
| 2584   | 2016 | 0.165 | 0.05 | 0.983319 | 0.9669168 | 21.58723 | 0.050073 | 15.79 |
| 2212   | 2016 | -0.41 | 0.05 | 0.983319 | 0.9669168 | 22.91432 | 0.012717 | 54.63 |
| 2741   | 2016 | 0.369 | 0.05 | 0.983319 | 0.9669168 | 20.71874 | 0.07977  | 35.88 |
| 2502   | 2016 | 1.74  | 0.05 | 0.983319 | 0.9669168 | 21.89218 | 0.104806 | 26.89 |
| 2441   | 2016 | -0.92 | 0.05 | 0.983319 | 0.9669168 | 22.24765 | 0.040562 | 29.32 |
| 534    | 2016 | 0.009 | 0.05 | 0.983319 | 0.9669168 | 21.58018 | 0.050891 | 52.38 |
| 2433   | 2016 | -0.87 | 0.05 | 0.983319 | 0.9669168 | 22.49932 | 0.053326 | 32.63 |
| 600978 | 2016 | -0.57 | 0.05 | 0.983319 | 0.9669168 | 23.49429 | 0.095417 | 24.85 |
| 150    | 2016 | -0.73 | 0.05 | 0.983319 | 0.9669168 | 22.69735 | 0.295861 | 37.08 |
| 2212   | 2016 | -0.24 | 0.05 | 0.983319 | 0.9669168 | 22.91432 | 0.012717 | 54.63 |
| 2759   | 2016 | -0.5  | 0.05 | 0.983319 | 0.9669168 | 21.97999 | 0.02306  | 27.22 |
| 2441   | 2016 | -0.92 | 0.05 | 0.983319 | 0.9669168 | 22.24765 | 0.040562 | 29.32 |
| 2584   | 2016 | 0.105 | 0.05 | 0.983319 | 0.9669168 | 21.58723 | 0.050073 | 15.79 |
| 150    | 2016 | -0.73 | 0.05 | 0.983319 | 0.9669168 | 22.33221 | 0.295861 | 37.08 |
| 823    | 2016 | -0.31 | 0.05 | 0.983319 | 0.9669168 | 22.27483 | 0.06969  | 30.31 |
| 2759   | 2016 | -0.5  | 0.05 | 0.983319 | 0.9669168 | 21.97999 | 0.02306  | 27.22 |
| 300043 | 2016 | -0.06 | 0.05 | 0.983319 | 0.9669168 | 22.35675 | 0.189213 | 32.77 |
| 823    | 2016 | -0.2  | 0.05 | 0.983319 | 0.9669168 | 22.27483 | 0.06969  | 30.31 |
| 823    | 2016 | -0.31 | 0.05 | 0.983319 | 0.9669168 | 22.27483 | 0.06969  | 30.31 |
| 823    | 2016 | -0.31 | 0.05 | 0.983319 | 0.9669168 | 22.27483 | 0.06969  | 30.31 |

|        |      |       |      |          |            |          |          |       |
|--------|------|-------|------|----------|------------|----------|----------|-------|
| 600978 | 2016 | -0.37 | 0.05 | 0.983319 | 0.9669168  | 23.49429 | 0.095417 | 24.85 |
| 300057 | 2016 | -0.63 | 0.05 | 0.983319 | 0.9669168  | 22.24332 | 0.034288 | 41.9  |
| 300093 | 2016 | -0.54 | 0.05 | 0.983319 | 0.9669168  | 20.85491 | 0.005361 | 11.24 |
| 2741   | 2016 | 0.369 | 0.05 | 0.983319 | 0.9669168  | 20.71874 | 0.07977  | 35.88 |
| 300093 | 2016 | -0.54 | 0.05 | 0.983319 | 0.9669168  | 20.96946 | 0.005361 | 11.24 |
| 2584   | 2016 | 0.079 | 0.05 | 0.983319 | 0.9669168  | 21.58723 | 0.050073 | 15.79 |
| 601515 | 2016 | -0.04 | 0.05 | 0.983319 | 0.9669168  | 22.48386 | 0.163248 | 54.4  |
| 603398 | 2016 | -0.55 | 0.05 | 0.983319 | 0.9669168  | 20.24793 | 0.100709 | 30.6  |
| 300281 | 2016 | -0.26 | 0.05 | 0.983319 | 0.9669168  | 20.86201 | 0.041904 | 44.56 |
| 2292   | 2016 | -0.18 | 0.05 | 0.983319 | 0.9669168  | 22.84747 | 0.097577 | 44.33 |
| 300093 | 2016 | -0.54 | 0.05 | 0.983319 | 0.9669168  | 20.96946 | 0.005361 | 11.24 |
| 600978 | 2016 | -0.5  | 0.05 | 0.983319 | 0.9669168  | 23.49429 | 0.095417 | 24.85 |
| 2212   | 2016 | 0.1   | 0.05 | 0.983319 | 0.9669168  | 22.91432 | 0.012717 | 54.63 |
| 300043 | 2016 | -0.01 | 0.05 | 0.983319 | 0.9669168  | 22.35675 | 0.189213 | 32.77 |
| 2292   | 2016 | -0.03 | 0.05 | 0.983319 | 0.9669168  | 22.57561 | 0.097577 | 44.33 |
| 2292   | 2016 | 0.099 | 0.05 | 0.983319 | 0.9669168  | 22.84747 | 0.097577 | 44.33 |
| 601515 | 2016 | 0.071 | 0.05 | 0.983319 | 0.9669168  | 22.48386 | 0.163248 | 54.4  |
| 603398 | 2016 | -0.55 | 0.05 | 0.983319 | 0.9669168  | 20.24793 | 0.100709 | 30.6  |
| 2292   | 2016 | -0.18 | 0.05 | 0.983319 | 0.9669168  | 22.84747 | 0.097577 | 44.33 |
| 2345   | 2016 | -0.78 | 0.05 | 0.983319 | 0.9669168  | 22.24352 | 0.071829 | 30.01 |
| 823    | 2016 | -0.31 | 0.05 | 0.983319 | 0.9669168  | 22.27483 | 0.06969  | 30.31 |
| 300057 | 2016 | 0.006 | 0.05 | 0.983319 | 0.9669168  | 22.24332 | 0.034288 | 41.9  |
| 601515 | 2016 | 0.103 | 0.05 | 0.983319 | 0.9669168  | 22.48386 | 0.163248 | 54.4  |
| 300281 | 2016 | -0.37 | 0.05 | 0.983319 | 0.9669168  | 20.86201 | 0.041904 | 44.56 |
| 2584   | 2016 | -0.49 | 0.05 | 0.983319 | 0.9669168  | 21.58723 | 0.050073 | 15.79 |
| 823    | 2016 | -0.64 | 0.05 | 0.983319 | 0.9669168  | 22.27483 | 0.06969  | 30.31 |
| 823    | 2016 | -0.1  | 0.05 | 0.983319 | 0.9669168  | 21.79384 | 0.06969  | 30.31 |
| 2441   | 2016 | -0.92 | 0.05 | 0.983319 | 0.9669168  | 22.24765 | 0.040562 | 29.32 |
| 2600   | 2016 | -0.76 | 0.05 | 0.510826 | 0.26094302 | 23.2687  | 0.046733 | 18.46 |
| 300340 | 2016 | -0.09 | 0.05 | 0.510826 | 0.26094302 | 21.49507 | 0.026327 | 19.14 |
| 2600   | 2016 | -0.76 | 0.05 | 0.510826 | 0.26094302 | 23.2687  | 0.046733 | 18.46 |
| 2600   | 2016 | -0.49 | 0.05 | 0.510826 | 0.26094302 | 23.2687  | 0.046733 | 18.46 |
| 2600   | 2016 | 0.56  | 0.05 | 0.510826 | 0.26094302 | 23.2687  | 0.046733 | 18.46 |
| 300403 | 2016 | -0.52 | 0.05 | 0.510826 | 0.26094302 | 21.2     | 0.140488 | 46.29 |
| 2600   | 2016 | -0.4  | 0.05 | 0.510826 | 0.26094302 | 23.2687  | 0.046733 | 18.46 |
| 300340 | 2016 | -0.09 | 0.05 | 0.510826 | 0.26094302 | 21.12556 | 0.026327 | 19.14 |
| 782    | 2016 | -0.61 | 0.05 | 0.510826 | 0.26094302 | 21.65718 | -0.06737 | 13    |
| 300403 | 2016 | -0.4  | 0.05 | 0.510826 | 0.26094302 | 21.11991 | 0.140488 | 46.29 |
| 300409 | 2016 | 0.7   | 0.05 | 0.510826 | 0.26094302 | 21.24508 | 0.086307 | 37.03 |
| 300403 | 2016 | -0.28 | 0.05 | 0.510826 | 0.26094302 | 21.11991 | 0.140488 | 46.29 |
| 300340 | 2016 | -0.29 | 0.05 | 0.510826 | 0.26094302 | 21.49507 | 0.026327 | 19.14 |
| 976    | 2016 | -0.84 | 0.05 | 0.510826 | 0.26094302 | 22.2285  | 0.007969 | 18.88 |
| 300340 | 2016 | -0.09 | 0.05 | 0.510826 | 0.26094302 | 21.49507 | 0.026327 | 19.14 |
| 300409 | 2016 | -0.04 | 0.05 | 0.510826 | 0.26094302 | 21.32488 | 0.086307 | 37.03 |
| 976    | 2016 | -0.76 | 0.05 | 0.510826 | 0.26094302 | 22.2285  | 0.007969 | 18.88 |
| 2600   | 2016 | -0.51 | 0.05 | 0.510826 | 0.26094302 | 23.2687  | 0.046733 | 18.46 |
| 2600   | 2016 | -0.76 | 0.05 | 0.510826 | 0.26094302 | 22.57572 | 0.046733 | 18.46 |
| 300403 | 2016 | -0.31 | 0.05 | 0.510826 | 0.26094302 | 21.11991 | 0.140488 | 46.29 |
| 300409 | 2016 | 0.7   | 0.05 | 0.510826 | 0.26094302 | 21.32488 | 0.086307 | 37.03 |
| 782    | 2016 | 0.168 | 0.05 | 0.510826 | 0.26094302 | 21.65718 | -0.06737 | 13    |
| 782    | 2016 | -0.61 | 0.05 | 0.510826 | 0.26094302 | 21.58877 | -0.06737 | 13    |
| 2600   | 2016 | -0.51 | 0.05 | 0.510826 | 0.26094302 | 23.2687  | 0.046733 | 18.46 |
| 2600   | 2016 | -0.1  | 0.05 | 0.510826 | 0.26094302 | 23.2687  | 0.046733 | 18.46 |
| 300340 | 2016 | -0.31 | 0.05 | 0.510826 | 0.26094302 | 21.49507 | 0.026327 | 19.14 |

|        |      |       |      |          |            |          |          |         |
|--------|------|-------|------|----------|------------|----------|----------|---------|
| 782    | 2016 | 0.048 | 0.05 | 0.510826 | 0.26094302 | 21.65718 | -0.06737 | 13      |
| 300403 | 2016 | -0.31 | 0.05 | 0.510826 | 0.26094302 | 21.11991 | 0.140488 | 46.29   |
| 2600   | 2016 | -0.76 | 0.05 | 0.510826 | 0.26094302 | 23.2687  | 0.046733 | 18.46   |
| 782    | 2016 | 0.168 | 0.05 | 0.510826 | 0.26094302 | 21.65718 | -0.06737 | 13      |
| 300409 | 2016 | 0.884 | 0.05 | 0.510826 | 0.26094302 | 21.32488 | 0.086307 | 37.03   |
| 300340 | 2016 | -0.09 | 0.05 | 0.510826 | 0.26094302 | 21.49507 | 0.026327 | 19.14   |
| 300403 | 2016 | 0.361 | 0.05 | 0.510826 | 0.26094302 | 21.11991 | 0.140488 | 46.29   |
| 2600   | 2016 | -0.1  | 0.05 | 0.510826 | 0.26094302 | 23.2687  | 0.046733 | 18.46   |
| 300403 | 2016 | -0.31 | 0.05 | 0.510826 | 0.26094302 | 21.11991 | 0.140488 | 46.29   |
| 300340 | 2016 | -0.31 | 0.05 | 0.510826 | 0.26094302 | 21.49507 | 0.026327 | 19.14   |
| 2723   | 2016 | -0.52 | 0.05 | 0.510826 | 0.26094302 | 20.77115 | 0.000668 | 37.52   |
| 2600   | 2016 | -0.76 | 0.05 | 0.510826 | 0.26094302 | 23.2687  | 0.046733 | 18.46   |
| 300403 | 2016 | -0.28 | 0.05 | 0.510826 | 0.26094302 | 21.11991 | 0.140488 | 46.29   |
| 2600   | 2016 | -0.76 | 0.05 | 0.510826 | 0.26094302 | 23.2687  | 0.046733 | 18.46   |
| 576    | 2016 | 0.09  | 0.05 | 0.510826 | 0.26094302 | 21.27035 | 0.078294 | 41.55   |
| 300409 | 2016 | -0.04 | 0.05 | 0.510826 | 0.26094302 | 21.32488 | 0.086307 | 37.03   |
| 576    | 2016 | 0.063 | 0.05 | 0.510826 | 0.26094302 | 21.27035 | 0.078294 | 41.55   |
| 782    | 2016 | -0.61 | 0.05 | 0.510826 | 0.26094302 | 21.65718 | -0.06737 | 13      |
| 2600   | 2016 | -0.1  | 0.05 | 0.510826 | 0.26094302 | 23.2687  | 0.046733 | 18.46   |
| 2600   | 2016 | -0.23 | 0.05 | 0.510826 | 0.26094302 | 23.2687  | 0.046733 | 18.46   |
| 2723   | 2016 | -0.52 | 0.05 | 0.510826 | 0.26094302 | 20.77115 | 0.000668 | 37.52   |
| 300409 | 2016 | 0.884 | 0.05 | 0.510826 | 0.26094302 | 21.32488 | 0.086307 | 37.03   |
| 2600   | 2016 | -0.62 | 0.05 | 0.510826 | 0.26094302 | 23.2687  | 0.046733 | 18.46   |
| 576    | 2016 | 0.063 | 0.05 | 0.510826 | 0.26094302 | 21.17846 | 0.078294 | 41.55   |
| 976    | 2016 | -0.75 | 0.05 | 0.510826 | 0.26094302 | 22.2285  | 0.007969 | 18.88   |
| 300340 | 2016 | -0.29 | 0.05 | 0.510826 | 0.26094302 | 21.49507 | 0.026327 | 19.14   |
| 2600   | 2016 | 0.118 | 0.05 | 0.510826 | 0.26094302 | 23.2687  | 0.046733 | 18.46   |
| 2600   | 2016 | -0.49 | 0.05 | 0.510826 | 0.26094302 | 23.2687  | 0.046733 | 18.46   |
| 976    | 2016 | -0.76 | 0.05 | 0.510826 | 0.26094302 | 22.01607 | 0.007969 | 18.88   |
| 576    | 2016 | -0.08 | 0.05 | 0.510826 | 0.26094302 | 21.27035 | 0.078294 | 41.55   |
| 300340 | 2016 | -0.28 | 0.05 | 0.510826 | 0.26094302 | 21.49507 | 0.026327 | 19.14   |
| 2723   | 2016 | -0.52 | 0.05 | 0.510826 | 0.26094302 | 20.77414 | 0.000668 | 37.52   |
| 2600   | 2016 | -0.76 | 0.05 | 0.510826 | 0.26094302 | 23.2687  | 0.046733 | 18.46   |
| 600718 | 2016 | 1.873 | 0    | 1.87933  | 3.5318821  | 23.18709 | 0.211646 | 10.6943 |
| 300290 | 2016 | 1.379 | 0    | 1.87933  | 3.5318821  | 20.82949 | 0.044281 | 25.89   |
| 2231   | 2016 | -0.43 | 0    | 1.87933  | 3.5318821  | 20.58842 | 0.004537 | 25.36   |
| 698    | 2016 | -0.22 | 0    | 1.87933  | 3.5318821  | 23.08392 | 0.080512 | 26.68   |
| 2231   | 2016 | -0.43 | 0    | 1.87933  | 3.5318821  | 20.58785 | 0.004537 | 25.36   |
| 300024 | 2016 | 0.799 | 0    | 1.87933  | 3.5318821  | 22.6806  | 0.074431 | 25.27   |
| 597    | 2016 | 0.535 | 0    | 1.87933  | 3.5318821  | 22.69744 | 0.010824 | 21.5    |
| 698    | 2016 | -0.8  | 0    | 1.87933  | 3.5318821  | 23.08392 | 0.080512 | 26.68   |
| 600167 | 2016 | -0.97 | 0    | 1.87933  | 3.5318821  | 22.59332 | 0.285191 | 62.73   |
| 600609 | 2016 | -0.69 | 0    | 1.87933  | 3.5318821  | 23.15426 | 0.001062 | 24.38   |
| 603609 | 2016 | -0.92 | 0    | 1.87933  | 3.5318821  | 22.36604 | 0.139346 | 17.12   |
| 300024 | 2016 | 0.799 | 0    | 1.87933  | 3.5318821  | 22.6806  | 0.074431 | 25.27   |
| 300293 | 2016 | 0.294 | 0    | 1.87933  | 3.5318821  | 20.9052  | 0.023245 | 42.19   |
| 597    | 2016 | -0.06 | 0    | 1.87933  | 3.5318821  | 23.00463 | 0.010824 | 21.5    |
| 597    | 2016 | 0.535 | 0    | 1.87933  | 3.5318821  | 23.00463 | 0.010824 | 21.5    |
| 2731   | 2016 | -0.97 | 0    | 1.87933  | 3.5318821  | 21.66051 | 0.043618 | 30.53   |
| 600167 | 2016 | -0.97 | 0    | 1.87933  | 3.5318821  | 22.59332 | 0.285191 | 62.73   |
| 600609 | 2016 | -0.55 | 0    | 1.87933  | 3.5318821  | 23.15426 | 0.001062 | 24.38   |
| 300024 | 2016 | 0.33  | 0    | 1.87933  | 3.5318821  | 22.6806  | 0.074431 | 25.27   |
| 600718 | 2016 | 1.564 | 0    | 1.87933  | 3.5318821  | 23.18709 | 0.211646 | 10.6943 |
| 300024 | 2016 | 1.232 | 0    | 1.87933  | 3.5318821  | 22.6806  | 0.074431 | 25.27   |

|        |      |       |   |         |           |          |          |         |
|--------|------|-------|---|---------|-----------|----------|----------|---------|
| 600609 | 2016 | -0.69 | 0 | 1.87933 | 3.5318821 | 23.15426 | 0.001062 | 24.38   |
| 300024 | 2016 | 0.799 | 0 | 1.87933 | 3.5318821 | 22.6806  | 0.074431 | 25.27   |
| 300293 | 2016 | 0.294 | 0 | 1.87933 | 3.5318821 | 20.90095 | 0.023245 | 42.19   |
| 2689   | 2016 | -0.04 | 0 | 1.87933 | 3.5318821 | 21.63915 | 0.048652 | 40.2    |
| 2731   | 2016 | -0.97 | 0 | 1.87933 | 3.5318821 | 21.14661 | 0.043618 | 30.53   |
| 300024 | 2016 | 0.937 | 0 | 1.87933 | 3.5318821 | 22.6806  | 0.074431 | 25.27   |
| 2731   | 2016 | -0.97 | 0 | 1.87933 | 3.5318821 | 21.66051 | 0.043618 | 30.53   |
| 597    | 2016 | 0.535 | 0 | 1.87933 | 3.5318821 | 23.00463 | 0.010824 | 21.5    |
| 2731   | 2016 | -0.97 | 0 | 1.87933 | 3.5318821 | 21.66051 | 0.043618 | 30.53   |
| 2689   | 2016 | -0.16 | 0 | 1.87933 | 3.5318821 | 21.63915 | 0.048652 | 40.2    |
| 603609 | 2016 | 0.4   | 0 | 1.87933 | 3.5318821 | 22.36604 | 0.139346 | 17.12   |
| 603609 | 2016 | 0.4   | 0 | 1.87933 | 3.5318821 | 22.36604 | 0.139346 | 17.12   |
| 600609 | 2016 | -0.56 | 0 | 1.87933 | 3.5318821 | 21.61261 | 0.001062 | 24.38   |
| 2689   | 2016 | 0.05  | 0 | 1.87933 | 3.5318821 | 21.63915 | 0.048652 | 40.2    |
| 300290 | 2016 | 1.379 | 0 | 1.87933 | 3.5318821 | 20.7794  | 0.044281 | 25.89   |
| 603609 | 2016 | -0.3  | 0 | 1.87933 | 3.5318821 | 22.36604 | 0.139346 | 17.12   |
| 600718 | 2016 | 1.311 | 0 | 1.87933 | 3.5318821 | 23.18709 | 0.211646 | 10.6943 |
| 600718 | 2016 | 1.564 | 0 | 1.87933 | 3.5318821 | 23.18709 | 0.211646 | 10.6943 |
| 597    | 2016 | 0.535 | 0 | 1.87933 | 3.5318821 | 23.00463 | 0.010824 | 21.5    |
| 600718 | 2016 | 1.507 | 0 | 1.87933 | 3.5318821 | 23.18709 | 0.211646 | 10.6943 |
| 600609 | 2016 | -0.55 | 0 | 1.87933 | 3.5318821 | 23.15426 | 0.001062 | 24.38   |
| 603609 | 2016 | 0.4   | 0 | 1.87933 | 3.5318821 | 22.36604 | 0.139346 | 17.12   |
| 300290 | 2016 | 1.379 | 0 | 1.87933 | 3.5318821 | 20.82949 | 0.044281 | 25.89   |
| 597    | 2016 | -0.06 | 0 | 1.87933 | 3.5318821 | 23.00463 | 0.010824 | 21.5    |
| 603609 | 2016 | -0.04 | 0 | 1.87933 | 3.5318821 | 22.36604 | 0.139346 | 17.12   |
| 300290 | 2016 | 1.379 | 0 | 1.87933 | 3.5318821 | 20.82949 | 0.044281 | 25.89   |
| 603609 | 2016 | -0.92 | 0 | 1.87933 | 3.5318821 | 22.36604 | 0.139346 | 17.12   |
| 597    | 2016 | 0.535 | 0 | 1.87933 | 3.5318821 | 23.00463 | 0.010824 | 21.5    |
| 410    | 2016 | 0.252 | 0 | 1.87933 | 3.5318821 | 23.93404 | -0.4336  | 30.13   |
| 600718 | 2016 | 1.564 | 0 | 1.87933 | 3.5318821 | 23.18709 | 0.211646 | 10.6943 |
| 600167 | 2016 | -0.97 | 0 | 1.87933 | 3.5318821 | 21.79323 | 0.285191 | 62.73   |
| 600609 | 2016 | -0.69 | 0 | 1.87933 | 3.5318821 | 23.15426 | 0.001062 | 24.38   |
| 600718 | 2016 | 1.311 | 0 | 1.87933 | 3.5318821 | 23.0497  | 0.211646 | 10.6943 |
| 300024 | 2016 | 0.799 | 0 | 1.87933 | 3.5318821 | 22.57485 | 0.074431 | 25.27   |
| 2731   | 2016 | -0.97 | 0 | 1.87933 | 3.5318821 | 21.66051 | 0.043618 | 30.53   |
| 410    | 2016 | -0.5  | 0 | 1.87933 | 3.5318821 | 23.93404 | -0.4336  | 30.13   |
| 300024 | 2016 | 0.744 | 0 | 1.87933 | 3.5318821 | 22.6806  | 0.074431 | 25.27   |
| 600718 | 2016 | 1.873 | 0 | 1.87933 | 3.5318821 | 23.18709 | 0.211646 | 10.6943 |
| 597    | 2016 | 0.37  | 0 | 1.87933 | 3.5318821 | 23.00463 | 0.010824 | 21.5    |
| 300024 | 2016 | 0.33  | 0 | 1.87933 | 3.5318821 | 22.6806  | 0.074431 | 25.27   |
| 410    | 2016 | -0.06 | 0 | 1.87933 | 3.5318821 | 23.93404 | -0.4336  | 30.13   |
| 600609 | 2016 | -0.55 | 0 | 1.87933 | 3.5318821 | 23.15426 | 0.001062 | 24.38   |
| 698    | 2016 | -0.8  | 0 | 1.87933 | 3.5318821 | 23.08392 | 0.080512 | 26.68   |
| 600715 | 2016 | 0.499 | 0 | 1.87933 | 3.5318821 | 22.36728 | 0.133896 | 22.88   |
| 600718 | 2016 | 1.564 | 0 | 1.87933 | 3.5318821 | 23.18709 | 0.211646 | 10.6943 |
| 300024 | 2016 | 1.398 | 0 | 1.87933 | 3.5318821 | 22.6806  | 0.074431 | 25.27   |
| 2689   | 2016 | -0.16 | 0 | 1.87933 | 3.5318821 | 21.63915 | 0.048652 | 40.2    |
| 600609 | 2016 | -0.59 | 0 | 1.87933 | 3.5318821 | 23.15426 | 0.001062 | 24.38   |
| 410    | 2016 | -0.24 | 0 | 1.87933 | 3.5318821 | 23.93404 | -0.4336  | 30.13   |
| 410    | 2016 | -0.31 | 0 | 1.87933 | 3.5318821 | 23.78553 | -0.4336  | 30.13   |
| 300024 | 2016 | 1.398 | 0 | 1.87933 | 3.5318821 | 22.6806  | 0.074431 | 25.27   |
| 410    | 2016 | -0.27 | 0 | 1.87933 | 3.5318821 | 23.93404 | -0.4336  | 30.13   |
| 410    | 2016 | -0.14 | 0 | 1.87933 | 3.5318821 | 23.93404 | -0.4336  | 30.13   |
| 603609 | 2016 | 0.4   | 0 | 1.87933 | 3.5318821 | 22.36604 | 0.139346 | 17.12   |

|        |      |       |      |          |           |          |          |       |
|--------|------|-------|------|----------|-----------|----------|----------|-------|
| 600167 | 2016 | -0.97 | 0    | 1.87933  | 3.5318821 | 22.59332 | 0.285191 | 62.73 |
| 410    | 2016 | -0.14 | 0    | 1.87933  | 3.5318821 | 23.93404 | -0.4336  | 30.13 |
| 603609 | 2016 | -0.83 | 0    | 1.87933  | 3.5318821 | 22.04738 | 0.139346 | 17.12 |
| 603609 | 2016 | 0.4   | 0    | 1.87933  | 3.5318821 | 22.36604 | 0.139346 | 17.12 |
| 603609 | 2016 | -0.29 | 0    | 1.87933  | 3.5318821 | 22.36604 | 0.139346 | 17.12 |
| 600715 | 2016 | 0.499 | 0    | 1.87933  | 3.5318821 | 22.36728 | 0.133896 | 22.88 |
| 603609 | 2016 | -0.26 | 0    | 1.87933  | 3.5318821 | 22.36604 | 0.139346 | 17.12 |
| 300293 | 2016 | 0.294 | 0    | 1.87933  | 3.5318821 | 20.90095 | 0.023245 | 42.19 |
| 698    | 2016 | -0.8  | 0    | 1.87933  | 3.5318821 | 23.08392 | 0.080512 | 26.68 |
| 600715 | 2016 | 0.499 | 0    | 1.87933  | 3.5318821 | 22.7161  | 0.133896 | 22.88 |
| 603609 | 2016 | -0.13 | 0    | 1.87933  | 3.5318821 | 22.36604 | 0.139346 | 17.12 |
| 2689   | 2016 | -0.16 | 0    | 1.87933  | 3.5318821 | 21.63915 | 0.048652 | 40.2  |
| 2231   | 2016 | -0.43 | 0    | 1.87933  | 3.5318821 | 20.58785 | 0.004537 | 25.36 |
| 2731   | 2016 | -0.97 | 0    | 1.87933  | 3.5318821 | 21.66051 | 0.043618 | 30.53 |
| 2689   | 2016 | 0.05  | 0    | 1.87933  | 3.5318821 | 21.63915 | 0.048652 | 40.2  |
| 2689   | 2016 | -0.16 | 0    | 1.87933  | 3.5318821 | 21.68553 | 0.048652 | 40.2  |
| 597    | 2016 | 0.535 | 0    | 1.87933  | 3.5318821 | 23.00463 | 0.010824 | 21.5  |
| 600609 | 2016 | -0.55 | 0    | 1.87933  | 3.5318821 | 23.15426 | 0.001062 | 24.38 |
| 698    | 2016 | -0.49 | 0    | 1.87933  | 3.5318821 | 22.68107 | 0.080512 | 26.68 |
| 300290 | 2016 | 1.379 | 0    | 1.87933  | 3.5318821 | 20.82949 | 0.044281 | 25.89 |
| 698    | 2016 | -0.41 | 0    | 1.87933  | 3.5318821 | 23.08392 | 0.080512 | 26.68 |
| 2494   | 2016 | -0.06 | 0    | 1.590383 | 2.5293185 | 21.64977 | 0.005045 | 31.31 |
| 300107 | 2016 | 0.728 | 0    | 1.590383 | 2.5293185 | 20.66498 | 0.024995 | 39.64 |
| 2108   | 2016 | -0.91 | 0    | 1.590383 | 2.5293185 | 22.01288 | 0.175515 | 29.16 |
| 2108   | 2016 | -0.91 | 0    | 1.590383 | 2.5293185 | 22.01288 | 0.175515 | 29.16 |
| 300107 | 2016 | 0.728 | 0    | 1.590383 | 2.5293185 | 20.66498 | 0.024995 | 39.64 |
| 2108   | 2016 | -0.76 | 0    | 1.590383 | 2.5293185 | 22.01288 | 0.175515 | 29.16 |
| 600230 | 2016 | -0.98 | 0    | 1.590383 | 2.5293185 | 22.01889 | 0.25444  | 48.01 |
| 2108   | 2016 | -0.91 | 0    | 1.590383 | 2.5293185 | 22.01288 | 0.175515 | 29.16 |
| 300107 | 2016 | 0.728 | 0    | 1.590383 | 2.5293185 | 20.66498 | 0.024995 | 39.64 |
| 2494   | 2016 | -0.06 | 0    | 1.590383 | 2.5293185 | 21.64977 | 0.005045 | 31.31 |
| 600230 | 2016 | -0.98 | 0    | 1.590383 | 2.5293185 | 22.04409 | 0.25444  | 48.01 |
| 2108   | 2016 | -0.91 | 0    | 1.590383 | 2.5293185 | 21.78542 | 0.175515 | 29.16 |
| 600230 | 2016 | -0.98 | 0    | 1.590383 | 2.5293185 | 22.04409 | 0.25444  | 48.01 |
| 2108   | 2016 | -0.85 | 0    | 1.590383 | 2.5293185 | 22.01288 | 0.175515 | 29.16 |
| 600230 | 2016 | -0.98 | 0    | 1.590383 | 2.5293185 | 22.04409 | 0.25444  | 48.01 |
| 2108   | 2016 | -0.84 | 0    | 1.590383 | 2.5293185 | 22.01288 | 0.175515 | 29.16 |
| 2494   | 2016 | -0.06 | 0    | 1.590383 | 2.5293185 | 21.58592 | 0.005045 | 31.31 |
| 2494   | 2016 | -0.06 | 0    | 1.590383 | 2.5293185 | 21.64977 | 0.005045 | 31.31 |
| 600230 | 2016 | -0.98 | 0    | 1.590383 | 2.5293185 | 22.04409 | 0.25444  | 48.01 |
| 300198 | 2016 | -0.77 | 0.04 | 1.233776 | 1.5222043 | 21.62121 | 0.049478 | 25.96 |
| 600573 | 2016 | -0.87 | 0.04 | 1.233776 | 1.5222043 | 20.89409 | 0.00221  | 50.08 |
| 300198 | 2016 | -0.5  | 0.04 | 1.233776 | 1.5222043 | 21.43722 | 0.049478 | 25.96 |
| 603636 | 2016 | 0.219 | 0.04 | 1.233776 | 1.5222043 | 20.9963  | 0.047821 | 56.54 |
| 2102   | 2016 | 0.105 | 0.04 | 1.233776 | 1.5222043 | 22.68615 | 0.053967 | 12.96 |
| 601566 | 2016 | -0.75 | 0.04 | 1.233776 | 1.5222043 | 22.43167 | 0.094505 | 53.73 |
| 2098   | 2016 | -0.3  | 0.04 | 1.233776 | 1.5222043 | 20.98935 | 0.104869 | 25    |
| 2509   | 2016 | -0.7  | 0.04 | 1.233776 | 1.5222043 | 22.72158 | 0.092473 | 18.36 |
| 2674   | 2016 | -0.71 | 0.04 | 1.233776 | 1.5222043 | 21.71138 | 0.026845 | 27.95 |
| 300198 | 2016 | -0.55 | 0.04 | 1.233776 | 1.5222043 | 21.62121 | 0.049478 | 25.96 |
| 600573 | 2016 | -0.87 | 0.04 | 1.233776 | 1.5222043 | 20.89409 | 0.00221  | 50.08 |
| 300198 | 2016 | -0.77 | 0.04 | 1.233776 | 1.5222043 | 21.62121 | 0.049478 | 25.96 |
| 603678 | 2016 | -0.1  | 0.04 | 1.233776 | 1.5222043 | 21.80101 | 0.080853 | 40.84 |
| 603555 | 2016 | -0.71 | 0.04 | 1.233776 | 1.5222043 | 22.7906  | 0.104729 | 74.18 |



|        |      |       |      |          |           |          |          |       |
|--------|------|-------|------|----------|-----------|----------|----------|-------|
| 300198 | 2016 | 0.557 | 0.04 | 1.233776 | 1.5222043 | 21.62121 | 0.049478 | 25.96 |
| 603555 | 2016 | -0.71 | 0.04 | 1.233776 | 1.5222043 | 22.7906  | 0.104729 | 74.18 |
| 2578   | 2016 | -0.31 | 0.04 | 1.233776 | 1.5222043 | 21.21897 | 0.011483 | 27.86 |
| 2674   | 2016 | -0.15 | 0.04 | 1.233776 | 1.5222043 | 21.71138 | 0.026845 | 27.95 |
| 2509   | 2016 | -0.26 | 0.04 | 1.233776 | 1.5222043 | 22.72158 | 0.092473 | 18.36 |
| 2509   | 2016 | -0.7  | 0.04 | 1.233776 | 1.5222043 | 22.39053 | 0.092473 | 18.36 |
| 2674   | 2016 | -0.15 | 0.04 | 1.233776 | 1.5222043 | 21.69623 | 0.026845 | 27.95 |
| 603636 | 2016 | 1.544 | 0.04 | 1.233776 | 1.5222043 | 20.99525 | 0.047821 | 56.54 |
| 2102   | 2016 | 0.105 | 0.04 | 1.233776 | 1.5222043 | 22.68615 | 0.053967 | 12.96 |
| 2098   | 2016 | -0.29 | 0.04 | 1.233776 | 1.5222043 | 20.98935 | 0.104869 | 25    |
| 2174   | 2016 | 1.386 | 0.04 | 1.233776 | 1.5222043 | 22.27165 | 0.219477 | 35.13 |
| 2098   | 2016 | -0.78 | 0.04 | 1.233776 | 1.5222043 | 21.10305 | 0.104869 | 25    |
| 603636 | 2016 | 1.544 | 0.04 | 1.233776 | 1.5222043 | 20.99525 | 0.047821 | 56.54 |
| 600493 | 2016 | -0.49 | 0.04 | 1.233776 | 1.5222043 | 20.7355  | 0.081665 | 10.72 |
| 2102   | 2016 | 0.105 | 0.04 | 1.233776 | 1.5222043 | 22.68615 | 0.053967 | 12.96 |
| 603678 | 2016 | -0.17 | 0.04 | 1.233776 | 1.5222043 | 21.80101 | 0.080853 | 40.84 |
| 603636 | 2016 | 1.223 | 0.04 | 1.233776 | 1.5222043 | 20.99525 | 0.047821 | 56.54 |
| 2174   | 2016 | 0.723 | 0.04 | 1.233776 | 1.5222043 | 22.54764 | 0.219477 | 35.13 |
| 603678 | 2016 | -0.11 | 0.04 | 1.233776 | 1.5222043 | 21.80101 | 0.080853 | 40.84 |
| 600493 | 2016 | -0.49 | 0.04 | 1.233776 | 1.5222043 | 20.7355  | 0.081665 | 10.72 |
| 600573 | 2016 | -0.87 | 0.04 | 1.233776 | 1.5222043 | 20.90335 | 0.00221  | 50.08 |
| 2509   | 2016 | -0.7  | 0.04 | 1.233776 | 1.5222043 | 22.72158 | 0.092473 | 18.36 |
| 601566 | 2016 | -0.75 | 0.04 | 1.233776 | 1.5222043 | 22.43167 | 0.094505 | 53.73 |
| 2102   | 2016 | 0.105 | 0.04 | 1.233776 | 1.5222043 | 22.16943 | 0.053967 | 12.96 |
| 2509   | 2016 | -0.26 | 0.04 | 1.233776 | 1.5222043 | 22.72158 | 0.092473 | 18.36 |
| 2578   | 2016 | -0.31 | 0.04 | 1.233776 | 1.5222043 | 21.25043 | 0.011483 | 27.86 |
| 603678 | 2016 | -0.1  | 0.04 | 1.233776 | 1.5222043 | 21.54189 | 0.080853 | 40.84 |
| 300198 | 2016 | 0.557 | 0.04 | 1.233776 | 1.5222043 | 21.62121 | 0.049478 | 25.96 |
| 300198 | 2016 | -0.42 | 0.04 | 1.233776 | 1.5222043 | 21.62121 | 0.049478 | 25.96 |
| 601566 | 2016 | -0.75 | 0.04 | 1.233776 | 1.5222043 | 22.42213 | 0.094505 | 53.73 |
| 2098   | 2016 | -0.78 | 0.04 | 1.233776 | 1.5222043 | 21.10305 | 0.104869 | 25    |
| 2029   | 2016 | 0.172 | 0.04 | 1.233776 | 1.5222043 | 22.79262 | 0.052818 | 34.29 |
| 2098   | 2016 | -0.29 | 0.04 | 1.233776 | 1.5222043 | 21.10305 | 0.104869 | 25    |
| 2509   | 2016 | -0.58 | 0.04 | 1.233776 | 1.5222043 | 22.72158 | 0.092473 | 18.36 |
| 603555 | 2016 | -0.71 | 0.04 | 1.233776 | 1.5222043 | 22.59409 | 0.104729 | 74.18 |
| 2509   | 2016 | -0.26 | 0.04 | 1.233776 | 1.5222043 | 22.72158 | 0.092473 | 18.36 |
| 603636 | 2016 | 0.219 | 0.04 | 1.233776 | 1.5222043 | 20.99525 | 0.047821 | 56.54 |
| 300198 | 2016 | 0.557 | 0.04 | 1.233776 | 1.5222043 | 21.62121 | 0.049478 | 25.96 |
| 2102   | 2016 | 0.105 | 0.04 | 1.233776 | 1.5222043 | 22.68615 | 0.053967 | 12.96 |
| 2174   | 2016 | 0.723 | 0.04 | 1.233776 | 1.5222043 | 22.27165 | 0.219477 | 35.13 |
| 2029   | 2016 | 0.172 | 0.04 | 1.233776 | 1.5222043 | 22.79262 | 0.052818 | 34.29 |
| 2509   | 2016 | -0.6  | 0.04 | 1.233776 | 1.5222043 | 22.72158 | 0.092473 | 18.36 |
| 2509   | 2016 | -0.58 | 0.04 | 1.233776 | 1.5222043 | 22.72158 | 0.092473 | 18.36 |
| 2098   | 2016 | -0.78 | 0.04 | 1.233776 | 1.5222043 | 21.10305 | 0.104869 | 25    |
| 2578   | 2016 | -0.31 | 0.04 | 1.233776 | 1.5222043 | 21.25043 | 0.011483 | 27.86 |
| 2174   | 2016 | 0.797 | 0.04 | 1.233776 | 1.5222043 | 22.27165 | 0.219477 | 35.13 |
| 2174   | 2016 | 0.723 | 0.04 | 1.233776 | 1.5222043 | 22.27165 | 0.219477 | 35.13 |
| 603636 | 2016 | 1.544 | 0.04 | 1.233776 | 1.5222043 | 20.99525 | 0.047821 | 56.54 |
| 2509   | 2016 | -0.26 | 0.04 | 1.233776 | 1.5222043 | 22.72158 | 0.092473 | 18.36 |
| 2029   | 2016 | 0.172 | 0.04 | 1.233776 | 1.5222043 | 22.573   | 0.052818 | 34.29 |
| 2674   | 2016 | -0.71 | 0.04 | 1.233776 | 1.5222043 | 21.71138 | 0.026845 | 27.95 |
| 2509   | 2016 | -0.26 | 0.04 | 1.233776 | 1.5222043 | 22.72158 | 0.092473 | 18.36 |
| 603636 | 2016 | 1.544 | 0.04 | 1.233776 | 1.5222043 | 20.99525 | 0.047821 | 56.54 |
| 300198 | 2016 | -0.45 | 0.04 | 1.233776 | 1.5222043 | 21.62121 | 0.049478 | 25.96 |

|        |      |       |      |          |            |          |          |       |
|--------|------|-------|------|----------|------------|----------|----------|-------|
| 600573 | 2016 | -0.87 | 0.04 | 1.233776 | 1.5222043  | 20.89409 | 0.00221  | 50.08 |
| 2674   | 2016 | -0.25 | 0.04 | 1.233776 | 1.5222043  | 21.71138 | 0.026845 | 27.95 |
| 2674   | 2016 | -0.71 | 0.04 | 1.233776 | 1.5222043  | 21.71138 | 0.026845 | 27.95 |
| 603678 | 2016 | -0.17 | 0.04 | 1.233776 | 1.5222043  | 21.80101 | 0.080853 | 40.84 |
| 2174   | 2016 | 0.797 | 0.04 | 1.233776 | 1.5222043  | 22.27165 | 0.219477 | 35.13 |
| 600493 | 2016 | -0.49 | 0.04 | 1.233776 | 1.5222043  | 20.61875 | 0.081665 | 10.72 |
| 600573 | 2016 | -0.87 | 0.04 | 1.233776 | 1.5222043  | 20.89409 | 0.00221  | 50.08 |
| 600756 | 2016 | 1.821 | 0    | 0.510826 | 0.26094302 | 21.8521  | 0.055406 | 19.09 |
| 600756 | 2016 | 1.821 | 0    | 0.510826 | 0.26094302 | 21.8521  | 0.055406 | 19.09 |
| 600756 | 2016 | 1.821 | 0    | 0.510826 | 0.26094302 | 21.8521  | 0.055406 | 19.09 |
| 300099 | 2016 | 0.422 | 0    | 0.510826 | 0.26094302 | 21.32473 | 0.027996 | 31.92 |
| 300099 | 2016 | 0.289 | 0    | 0.510826 | 0.26094302 | 21.21272 | 0.027996 | 31.92 |
| 600756 | 2016 | 1.821 | 0    | 0.510826 | 0.26094302 | 21.88708 | 0.055406 | 19.09 |
| 300099 | 2016 | 0.422 | 0    | 0.510826 | 0.26094302 | 21.32473 | 0.027996 | 31.92 |
| 600756 | 2016 | 1.821 | 0    | 0.510826 | 2.61E-01   | 21.8521  | 0.055406 | 19.09 |
| 600756 | 2016 | 1.821 | 0    | 0.510826 | 2.61E-01   | 21.8521  | 0.055406 | 19.09 |
| 300099 | 2016 | -0.11 | 0    | 0.510826 | 2.61E-01   | 21.32473 | 0.027996 | 31.92 |
| 600756 | 2016 | 1.821 | 0    | 0.510826 | 2.61E-01   | 21.8521  | 0.055406 | 19.09 |
| 300099 | 2016 | 1.217 | 0    | 0.510826 | 2.61E-01   | 21.32473 | 0.027996 | 31.92 |
| 300099 | 2016 | 0.422 | 0    | 0.510826 | 2.61E-01   | 21.32473 | 0.027996 | 31.92 |
| 300099 | 2016 | 0.157 | 0    | 0.510826 | 2.61E-01   | 21.32473 | 0.027996 | 31.92 |
| 600854 | 2016 | -0.46 | 0.01 | 1.259021 | 1.59E+00   | 21.54893 | -0.00646 | 25.34 |
| 600854 | 2016 | -0.64 | 0.01 | 1.259021 | 1.59E+00   | 21.54893 | -0.00646 | 25.34 |
| 300258 | 2016 | 0.007 | 0.01 | 1.259021 | 1.585134   | 21.439   | 0.131093 | 48.36 |
| 600854 | 2016 | -0.64 | 0.01 | 1.259021 | 1.585134   | 21.54893 | -0.00646 | 25.34 |
| 601890 | 2016 | -0.17 | 0.01 | 1.259021 | 1.585134   | 22.05824 | 0.015629 | 27.7  |
| 300258 | 2016 | 0.007 | 0.01 | 1.259021 | 1.585134   | 21.439   | 0.131093 | 48.36 |
| 600099 | 2016 | -0.36 | 0.01 | 1.259021 | 1.585134   | 20.11736 | 0.004078 | 42.1  |
| 600854 | 2016 | -0.46 | 0.01 | 1.259021 | 1.585134   | 21.54893 | -0.00646 | 25.34 |
| 600099 | 2016 | -0.36 | 0.01 | 1.259021 | 1.585134   | 20.19689 | 0.004078 | 42.1  |
| 300258 | 2016 | 0.079 | 0.01 | 1.259021 | 1.585134   | 21.439   | 0.131093 | 48.36 |
| 300258 | 2016 | 0.079 | 0.01 | 1.259021 | 1.585134   | 21.439   | 0.131093 | 48.36 |
| 600854 | 2016 | -0.64 | 0.01 | 1.259021 | 1.585134   | 21.54893 | -0.00646 | 25.34 |
| 600099 | 2016 | -0.36 | 0.01 | 1.259021 | 1.585134   | 20.19689 | 0.004078 | 42.1  |
| 600854 | 2016 | -0.24 | 0.01 | 1.259021 | 1.585134   | 21.69851 | -0.00646 | 25.34 |
| 601890 | 2016 | -0.2  | 0.01 | 1.259021 | 1.585134   | 22.02061 | 0.015629 | 27.7  |
| 601890 | 2016 | -0.24 | 0.01 | 1.259021 | 1.585134   | 22.05824 | 0.015629 | 27.7  |
| 300258 | 2016 | 0.071 | 0.01 | 1.259021 | 1.585134   | 21.26556 | 0.131093 | 48.36 |
| 601890 | 2016 | -0.17 | 0.01 | 1.259021 | 1.585134   | 22.05824 | 0.015629 | 27.7  |
| 600099 | 2016 | -0.36 | 0.01 | 1.259021 | 1.585134   | 20.19689 | 0.004078 | 42.1  |
| 600854 | 2016 | -0.64 | 0.01 | 1.259021 | 1.585134   | 21.54893 | -0.00646 | 25.34 |
| 601890 | 2016 | -0.17 | 0.01 | 1.259021 | 1.585134   | 22.05824 | 0.015629 | 27.7  |
| 601890 | 2016 | -0.24 | 0.01 | 1.259021 | 1.585134   | 22.05824 | 0.015629 | 27.7  |
| 601890 | 2016 | -0.17 | 0.01 | 1.259021 | 1.585134   | 22.05824 | 0.015629 | 27.7  |
| 600099 | 2016 | -0.36 | 0.01 | 1.259021 | 1.585134   | 20.19689 | 0.004078 | 42.1  |
| 600854 | 2016 | -0.64 | 0.01 | 1.259021 | 1.585134   | 21.54893 | -0.00646 | 25.34 |
| 2246   | 2016 | -0.16 | 0.01 | 1.041974 | 1.0857095  | 21.81074 | 0.076262 | 16.15 |
| 2246   | 2016 | -0.16 | 0.01 | 1.041974 | 1.0857095  | 20.95525 | 0.076262 | 16.15 |
| 2246   | 2016 | -0.61 | 0.01 | 1.041974 | 1.0857095  | 21.81074 | 0.076262 | 16.15 |
| 568    | 2016 | -0.06 | 0.01 | 1.041974 | 1.0857095  | 23.21389 | 0.175259 | 28.11 |
| 568    | 2016 | -0.62 | 0.01 | 1.041974 | 1.0857095  | 23.33877 | 0.175259 | 28.11 |
| 568    | 2016 | 0.418 | 0.01 | 1.041974 | 1.0857095  | 23.33877 | 0.175259 | 28.11 |
| 2246   | 2016 | 0.272 | 0.01 | 1.041974 | 1.0857095  | 21.81074 | 0.076262 | 16.15 |
| 2246   | 2016 | -0.37 | 0.01 | 1.041974 | 1.0857095  | 21.81074 | 0.076262 | 16.15 |

|        |      |       |      |          |           |          |          |       |
|--------|------|-------|------|----------|-----------|----------|----------|-------|
| 568    | 2016 | 0.418 | 0.01 | 1.041974 | 1.0857095 | 23.33877 | 0.175259 | 28.11 |
| 2246   | 2016 | -0.3  | 0.01 | 1.041974 | 1.0857095 | 21.81074 | 0.076262 | 16.15 |
| 568    | 2016 | -0.62 | 0.01 | 1.041974 | 1.0857095 | 23.33877 | 0.175259 | 28.11 |
| 2179   | 2016 | -0.32 | 0.03 | 1.277317 | 1.6315374 | 22.86449 | 0.16835  | 41.57 |
| 2560   | 2016 | -0.48 | 0.03 | 1.277317 | 1.6315374 | 21.67365 | 0.050714 | 24.16 |
| 2613   | 2016 | 0.054 | 0.03 | 1.277317 | 1.6315374 | 21.39479 | 0.013663 | 54.23 |
| 2179   | 2016 | -0.13 | 0.03 | 1.277317 | 1.6315374 | 22.86449 | 0.16835  | 41.57 |
| 601608 | 2016 | 0.556 | 0.03 | 1.277317 | 1.6315374 | 23.70765 | -0.21685 | 60.49 |
| 601038 | 2016 | 0.123 | 0.03 | 1.277317 | 1.6315374 | 23.30428 | 0.041043 | 41.24 |
| 601038 | 2016 | -0.21 | 0.03 | 1.277317 | 1.6315374 | 23.30428 | 0.041043 | 41.24 |
| 300263 | 2016 | -0.51 | 0.03 | 1.277317 | 1.6315374 | 21.92268 | 0.006594 | 21.8  |
| 2613   | 2016 | -0.06 | 0.03 | 1.277317 | 1.6315374 | 21.39479 | 0.013663 | 54.23 |
| 601038 | 2016 | -0.21 | 0.03 | 1.277317 | 1.6315374 | 23.30428 | 0.041043 | 41.24 |
| 603566 | 2016 | -0.08 | 0.03 | 1.277317 | 1.6315374 | 21.27533 | 0.12695  | 33.24 |
| 601608 | 2016 | 0.362 | 0.03 | 1.277317 | 1.6315374 | 23.70765 | -0.21685 | 60.49 |
| 300263 | 2016 | 0.026 | 0.03 | 1.277317 | 1.6315374 | 21.92268 | 0.006594 | 21.8  |
| 601038 | 2016 | -0.17 | 0.03 | 1.277317 | 1.6315374 | 23.30428 | 0.041043 | 41.24 |
| 300263 | 2016 | 0.37  | 0.03 | 1.277317 | 1.6315374 | 21.92268 | 0.006594 | 21.8  |
| 601608 | 2016 | 0.429 | 0.03 | 1.277317 | 1.6315374 | 23.70765 | -0.21685 | 60.49 |
| 300263 | 2016 | -0.32 | 0.03 | 1.277317 | 1.6315374 | 21.92268 | 0.006594 | 21.8  |
| 603993 | 2016 | -0.43 | 0.03 | 1.277317 | 1.6315374 | 25.20227 | 0.029683 | 31.56 |
| 600876 | 2016 | 0.101 | 0.03 | 1.277317 | 1.6315374 | 20.92784 | 0.022008 | 47.21 |
| 603566 | 2016 | 1.125 | 0.03 | 1.277317 | 1.6315374 | 21.27533 | 0.12695  | 33.24 |
| 601608 | 2016 | 0.362 | 0.03 | 1.277317 | 1.6315374 | 23.70765 | -0.21685 | 60.49 |
| 2613   | 2016 | -0.05 | 0.03 | 1.277317 | 1.6315374 | 21.39479 | 0.013663 | 54.23 |
| 603566 | 2016 | 1.027 | 0.03 | 1.277317 | 1.6315374 | 21.24445 | 0.12695  | 33.24 |
| 2179   | 2016 | -0.32 | 0.03 | 1.277317 | 1.6315374 | 22.86449 | 0.16835  | 41.57 |
| 603566 | 2016 | 1.125 | 0.03 | 1.277317 | 1.6315374 | 21.27533 | 0.12695  | 33.24 |
| 601038 | 2016 | -0.21 | 0.03 | 1.277317 | 1.6315374 | 23.30428 | 0.041043 | 41.24 |
| 603566 | 2016 | -0.08 | 0.03 | 1.277317 | 1.6315374 | 21.27533 | 0.12695  | 33.24 |
| 2613   | 2016 | -0.05 | 0.03 | 1.277317 | 1.6315374 | 21.39479 | 0.013663 | 54.23 |
| 2613   | 2016 | 0.054 | 0.03 | 1.277317 | 1.6315374 | 21.08268 | 0.013663 | 54.23 |
| 2046   | 2016 | 0.862 | 0.03 | 1.277317 | 1.6315374 | 21.57352 | 0.007667 | 43.25 |
| 601608 | 2016 | 0.362 | 0.03 | 1.277317 | 1.6315374 | 23.70765 | -0.21685 | 60.49 |
| 2179   | 2016 | 0.748 | 0.03 | 1.277317 | 1.6315374 | 22.86449 | 0.16835  | 41.57 |
| 2046   | 2016 | 0.863 | 0.03 | 1.277317 | 1.6315374 | 21.57352 | 0.007667 | 43.25 |
| 2179   | 2016 | -0.32 | 0.03 | 1.277317 | 1.6315374 | 22.86449 | 0.16835  | 41.57 |
| 600876 | 2016 | 0.101 | 0.03 | 1.277317 | 1.6315374 | 21.02848 | 0.022008 | 47.21 |
| 603993 | 2016 | -0.43 | 0.03 | 1.277317 | 1.6315374 | 24.29945 | 0.029683 | 31.56 |
| 601608 | 2016 | 0.345 | 0.03 | 1.277317 | 1.6315374 | 23.70765 | -0.21685 | 60.49 |
| 300263 | 2016 | -0.29 | 0.03 | 1.277317 | 1.6315374 | 21.92268 | 0.006594 | 21.8  |
| 2560   | 2016 | -0.38 | 0.03 | 1.277317 | 1.6315374 | 21.67365 | 0.050714 | 24.16 |
| 601038 | 2016 | 0.785 | 0.03 | 1.277317 | 1.6315374 | 23.30428 | 0.041043 | 41.24 |
| 601038 | 2016 | -0.19 | 0.03 | 1.277317 | 1.6315374 | 23.30428 | 0.041043 | 41.24 |
| 603993 | 2016 | -0.37 | 0.03 | 1.277317 | 1.6315374 | 25.20227 | 0.029683 | 31.56 |
| 600876 | 2016 | 0.101 | 0.03 | 1.277317 | 1.6315374 | 21.02848 | 0.022008 | 47.21 |
| 603993 | 2016 | -0.37 | 0.03 | 1.277317 | 1.6315374 | 25.20227 | 0.029683 | 31.56 |
| 601608 | 2016 | 0.362 | 0.03 | 1.277317 | 1.6315374 | 23.70765 | -0.21685 | 60.49 |
| 2613   | 2016 | -0.11 | 0.03 | 1.277317 | 1.6315374 | 21.39479 | 0.013663 | 54.23 |
| 300263 | 2016 | -0.26 | 0.03 | 1.277317 | 1.6315374 | 21.92268 | 0.006594 | 21.8  |
| 2613   | 2016 | -0.09 | 0.03 | 1.277317 | 1.6315374 | 21.39479 | 0.013663 | 54.23 |
| 603566 | 2016 | 0.581 | 0.03 | 1.277317 | 1.6315374 | 21.27533 | 0.12695  | 33.24 |
| 601608 | 2016 | 0.556 | 0.03 | 1.277317 | 1.6315374 | 23.70765 | -0.21685 | 60.49 |
| 2046   | 2016 | 0.818 | 0.03 | 1.277317 | 1.6315374 | 21.57352 | 0.007667 | 43.25 |

|        |      |       |      |          |           |          |          |       |
|--------|------|-------|------|----------|-----------|----------|----------|-------|
| 603566 | 2016 | -0.2  | 0.03 | 1.277317 | 1.6315374 | 21.27533 | 0.12695  | 33.24 |
| 600876 | 2016 | 0.101 | 0.03 | 1.277317 | 1.6315374 | 21.02848 | 0.022008 | 47.21 |
| 601608 | 2016 | 0.362 | 0.03 | 1.277317 | 1.6315374 | 23.70765 | -0.21685 | 60.49 |
| 300263 | 2016 | -0.29 | 0.03 | 1.277317 | 1.6315374 | 21.92268 | 0.006594 | 21.8  |
| 2179   | 2016 | 0.271 | 0.03 | 1.277317 | 1.6315374 | 22.86449 | 0.16835  | 41.57 |
| 2179   | 2016 | 0.065 | 0.03 | 1.277317 | 1.6315374 | 22.86449 | 0.16835  | 41.57 |
| 2560   | 2016 | -0.38 | 0.03 | 1.277317 | 1.6315374 | 21.55736 | 0.050714 | 24.16 |
| 601608 | 2016 | 0.28  | 0.03 | 1.277317 | 1.6315374 | 23.70765 | -0.21685 | 60.49 |
| 601608 | 2016 | 0.355 | 0.03 | 1.277317 | 1.6315374 | 23.70765 | -0.21685 | 60.49 |
| 603566 | 2016 | 1.125 | 0.03 | 1.277317 | 1.6315374 | 21.27533 | 0.12695  | 33.24 |
| 2560   | 2016 | -0.66 | 0.03 | 1.277317 | 1.6315374 | 21.67365 | 0.050714 | 24.16 |
| 2560   | 2016 | -0.66 | 0.03 | 1.277317 | 1.6315374 | 21.67365 | 0.050714 | 24.16 |
| 300263 | 2016 | -0.29 | 0.03 | 1.277317 | 1.6315374 | 21.85349 | 0.006594 | 21.8  |
| 2179   | 2016 | 0.115 | 0.03 | 1.277317 | 1.6315374 | 22.86449 | 0.16835  | 41.57 |
| 603993 | 2016 | -0.38 | 0.03 | 1.277317 | 1.6315374 | 25.20227 | 0.029683 | 31.56 |
| 2179   | 2016 | -0.13 | 0.03 | 1.277317 | 1.6315374 | 22.86449 | 0.16835  | 41.57 |
| 2613   | 2016 | -0.3  | 0.03 | 1.277317 | 1.6315374 | 21.39479 | 0.013663 | 54.23 |
| 603993 | 2016 | -0.43 | 0.03 | 1.277317 | 1.6315374 | 25.20227 | 0.029683 | 31.56 |
| 603993 | 2016 | 0.224 | 0.03 | 1.277317 | 1.6315374 | 25.20227 | 0.029683 | 31.56 |
| 2613   | 2016 | -0.11 | 0.03 | 1.277317 | 1.6315374 | 21.39479 | 0.013663 | 54.23 |
| 2179   | 2016 | 0.36  | 0.03 | 1.277317 | 1.6315374 | 22.86449 | 0.16835  | 41.57 |
| 601038 | 2016 | -0.21 | 0.03 | 1.277317 | 1.6315374 | 23.06819 | 0.041043 | 41.24 |
| 2179   | 2016 | 0.748 | 0.03 | 1.277317 | 1.6315374 | 22.86449 | 0.16835  | 41.57 |
| 300263 | 2016 | -0.32 | 0.03 | 1.277317 | 1.6315374 | 21.92268 | 0.006594 | 21.8  |
| 2179   | 2016 | 0.672 | 0.03 | 1.277317 | 1.6315374 | 22.86449 | 0.16835  | 41.57 |
| 2046   | 2016 | 0.818 | 0.03 | 1.277317 | 1.6315374 | 21.57352 | 0.007667 | 43.25 |
| 601608 | 2016 | 0.357 | 0.03 | 1.277317 | 1.6315374 | 23.68759 | -0.21685 | 60.49 |
| 601038 | 2016 | -0.02 | 0.03 | 1.277317 | 1.6315374 | 23.30428 | 0.041043 | 41.24 |
| 603566 | 2016 | 1.027 | 0.03 | 1.277317 | 1.6315374 | 21.27533 | 0.12695  | 33.24 |
| 2046   | 2016 | 0.863 | 0.03 | 1.277317 | 1.6315374 | 21.47893 | 0.007667 | 43.25 |
| 2179   | 2016 | -0.23 | 0.03 | 1.277317 | 1.6315374 | 22.86449 | 0.16835  | 41.57 |
| 603993 | 2016 | -0.76 | 0.03 | 1.277317 | 1.6315374 | 25.20227 | 0.029683 | 31.56 |
| 2613   | 2016 | 0.186 | 0.03 | 1.277317 | 1.6315374 | 21.39479 | 0.013663 | 54.23 |
| 2179   | 2016 | 0.36  | 0.03 | 1.277317 | 1.6315374 | 22.64623 | 0.16835  | 41.57 |
| 600876 | 2016 | 0.101 | 0.03 | 1.277317 | 1.6315374 | 21.02848 | 0.022008 | 47.21 |
| 977    | 2016 | 0.918 | 0    | 1.389179 | 1.9298175 | 22.92925 | 0.071782 | 40.9  |
| 600547 | 2016 | -0.94 | 0    | 1.389179 | 1.9298175 | 24.06815 | 0.080075 | 44.8  |
| 2270   | 2016 | -0.48 | 0    | 1.389179 | 1.9298175 | 21.96693 | 0.124689 | 33.34 |
| 2598   | 2016 | -0.5  | 0    | 1.389179 | 1.9298175 | 20.75317 | 0.073906 | 29.81 |
| 2242   | 2016 | -0.55 | 0    | 1.389179 | 1.9298175 | 22.4447  | 0.208704 | 48.21 |
| 600022 | 2016 | -0.66 | 0    | 1.389179 | 1.9298175 | 24.71992 | -0.02378 | 30.26 |
| 600022 | 2016 | -0.43 | 0    | 1.389179 | 1.9298175 | 24.71992 | -0.02378 | 30.26 |
| 2598   | 2016 | -0.5  | 0    | 1.389179 | 1.9298175 | 20.75518 | 0.073906 | 29.81 |
| 300479 | 2016 | 0.643 | 0    | 1.389179 | 1.9298175 | 20.10336 | 0.052575 | 45    |
| 2339   | 2016 | 1.226 | 0    | 1.389179 | 1.9298175 | 21.795   | 0.063133 | 7.84  |
| 2270   | 2016 | -0.38 | 0    | 1.389179 | 1.9298175 | 21.54528 | 0.124689 | 33.34 |
| 2117   | 2016 | -0.09 | 0    | 1.389179 | 1.9298175 | 21.51585 | 0.149273 | 15.09 |
| 2339   | 2016 | 0.002 | 0    | 1.389179 | 1.9298175 | 21.795   | 0.063133 | 7.84  |
| 2242   | 2016 | -0.55 | 0    | 1.389179 | 1.9298175 | 22.4447  | 0.208704 | 48.21 |
| 2339   | 2016 | 0.837 | 0    | 1.389179 | 1.9298175 | 21.795   | 0.063133 | 7.84  |
| 300479 | 2016 | 0.643 | 0    | 1.389179 | 1.9298175 | 20.10336 | 0.052575 | 45    |
| 2270   | 2016 | -0.46 | 0    | 1.389179 | 1.9298175 | 21.54528 | 0.124689 | 33.34 |
| 300443 | 2016 | -0.58 | 0    | 1.389179 | 1.9298175 | 21.27137 | 0.138658 | 43.13 |
| 300443 | 2016 | -0.58 | 0    | 1.389179 | 1.9298175 | 21.27137 | 0.138658 | 43.13 |

|        |      |       |   |          |           |          |          |       |
|--------|------|-------|---|----------|-----------|----------|----------|-------|
| 600350 | 2016 | -0.49 | 0 | 1.389179 | 1.9298175 | 24.53945 | 0.115726 | 70.91 |
| 498    | 2016 | -0.47 | 0 | 1.389179 | 1.9298175 | 23.43419 | 0.124175 | 60.66 |
| 600547 | 2016 | -0.28 | 0 | 1.389179 | 1.9298175 | 24.06815 | 0.080075 | 44.8  |
| 2242   | 2016 | -0.06 | 0 | 1.389179 | 1.9298175 | 22.4447  | 0.208704 | 48.21 |
| 2339   | 2016 | 1.062 | 0 | 1.389179 | 1.9298175 | 21.795   | 0.063133 | 7.84  |
| 2242   | 2016 | -0.23 | 0 | 1.389179 | 1.9298175 | 22.4447  | 0.208704 | 48.21 |
| 2117   | 2016 | -0.09 | 0 | 1.389179 | 1.9298175 | 21.51585 | 0.149273 | 15.09 |
| 2270   | 2016 | -0.38 | 0 | 1.389179 | 1.9298175 | 21.54528 | 0.124689 | 33.34 |
| 600547 | 2016 | -0.28 | 0 | 1.389179 | 1.9298175 | 24.06815 | 0.080075 | 44.8  |
| 2117   | 2016 | 0.546 | 0 | 1.389179 | 1.9298175 | 21.51585 | 0.149273 | 15.09 |
| 600547 | 2016 | -0.62 | 0 | 1.389179 | 1.9298175 | 24.06815 | 0.080075 | 44.8  |
| 498    | 2016 | -0.47 | 0 | 1.389179 | 1.9298175 | 23.43419 | 0.124175 | 60.66 |
| 2117   | 2016 | 0.083 | 0 | 1.389179 | 1.9298175 | 21.51585 | 0.149273 | 15.09 |
| 2598   | 2016 | -0.5  | 0 | 1.389179 | 1.9298175 | 20.75317 | 0.073906 | 29.81 |
| 2242   | 2016 | -0.36 | 0 | 1.389179 | 1.9298175 | 22.4447  | 0.208704 | 48.21 |
| 2339   | 2016 | 1.226 | 0 | 1.389179 | 1.9298175 | 21.795   | 0.063133 | 7.84  |
| 2117   | 2016 | 0.722 | 0 | 1.389179 | 1.9298175 | 21.28968 | 0.149273 | 15.09 |
| 2270   | 2016 | -0.59 | 0 | 1.389179 | 1.9298175 | 21.54528 | 0.124689 | 33.34 |
| 600547 | 2016 | -0.94 | 0 | 1.389179 | 1.9298175 | 24.06815 | 0.080075 | 44.8  |
| 600547 | 2016 | -0.94 | 0 | 1.389179 | 1.9298175 | 23.55398 | 0.080075 | 44.8  |
| 2339   | 2016 | 0.444 | 0 | 1.389179 | 1.9298175 | 21.795   | 0.063133 | 7.84  |
| 498    | 2016 | -0.44 | 0 | 1.389179 | 1.9298175 | 23.43419 | 0.124175 | 60.66 |
| 600022 | 2016 | -0.43 | 0 | 1.389179 | 1.9298175 | 24.71992 | -0.02378 | 30.26 |
| 977    | 2016 | 1.041 | 0 | 1.389179 | 1.93E+00  | 22.92925 | 0.071782 | 40.9  |
| 600350 | 2016 | -0.34 | 0 | 1.389179 | 1.93E+00  | 24.53945 | 0.115726 | 70.91 |
| 2242   | 2016 | -0.55 | 0 | 1.389179 | 1.93E+00  | 22.4447  | 0.208704 | 48.21 |
| 2117   | 2016 | 0.546 | 0 | 1.389179 | 1.9298175 | 21.51585 | 0.149273 | 15.09 |
| 600350 | 2016 | -0.34 | 0 | 1.389179 | 1.9298175 | 24.53945 | 0.115726 | 70.91 |
| 600350 | 2016 | -0.56 | 0 | 1.389179 | 1.9298175 | 24.53945 | 0.115726 | 70.91 |
| 2242   | 2016 | -0.06 | 0 | 1.389179 | 1.9298175 | 22.4447  | 0.208704 | 48.21 |
| 600022 | 2016 | -0.6  | 0 | 1.389179 | 1.9298175 | 24.71992 | -0.02378 | 30.26 |
| 2117   | 2016 | -0.09 | 0 | 1.389179 | 1.9298175 | 21.51585 | 0.149273 | 15.09 |
| 300479 | 2016 | 0.643 | 0 | 1.389179 | 1.9298175 | 20.10336 | 0.052575 | 45    |
| 2270   | 2016 | -0.59 | 0 | 1.389179 | 1.9298175 | 21.54528 | 0.124689 | 33.34 |
| 2117   | 2016 | -0.09 | 0 | 1.389179 | 1.9298175 | 21.51585 | 0.149273 | 15.09 |
| 600547 | 2016 | -0.75 | 0 | 1.389179 | 1.9298175 | 24.06815 | 0.080075 | 44.8  |
| 2270   | 2016 | -0.59 | 0 | 1.389179 | 1.9298175 | 21.54528 | 0.124689 | 33.34 |
| 2339   | 2016 | 1.108 | 0 | 1.389179 | 1.9298175 | 21.64081 | 0.063133 | 7.84  |
| 2242   | 2016 | -0.29 | 0 | 1.389179 | 1.9298175 | 21.93289 | 0.208704 | 48.21 |
| 2242   | 2016 | -0.55 | 0 | 1.389179 | 1.9298175 | 22.4447  | 0.208704 | 48.21 |
| 300479 | 2016 | 0.643 | 0 | 1.389179 | 1.9298175 | 20.10336 | 0.052575 | 45    |
| 2339   | 2016 | 0.738 | 0 | 1.389179 | 1.9298175 | 21.795   | 0.063133 | 7.84  |
| 498    | 2016 | -0.47 | 0 | 1.389179 | 1.9298175 | 23.43419 | 0.124175 | 60.66 |
| 600350 | 2016 | -0.56 | 0 | 1.389179 | 1.9298175 | 24.53945 | 0.115726 | 70.91 |
| 2242   | 2016 | -0.03 | 0 | 1.389179 | 1.9298175 | 22.4447  | 0.208704 | 48.21 |
| 2242   | 2016 | -0.08 | 0 | 1.389179 | 1.9298175 | 22.4447  | 0.208704 | 48.21 |
| 977    | 2016 | 1.166 | 0 | 1.389179 | 1.9298175 | 22.92925 | 0.071782 | 40.9  |
| 600350 | 2016 | -0.34 | 0 | 1.389179 | 1.9298175 | 24.53945 | 0.115726 | 70.91 |
| 600022 | 2016 | -0.32 | 0 | 1.389179 | 1.9298175 | 24.50784 | -0.02378 | 30.26 |
| 600350 | 2016 | -0.34 | 0 | 1.389179 | 1.9298175 | 24.45747 | 0.115726 | 70.91 |
| 600547 | 2016 | -0.94 | 0 | 1.389179 | 1.9298175 | 24.06815 | 0.080075 | 44.8  |
| 977    | 2016 | 0.759 | 0 | 1.389179 | 1.9298175 | 22.90605 | 0.071782 | 40.9  |
| 2117   | 2016 | -0.09 | 0 | 1.389179 | 1.9298175 | 21.51585 | 0.149273 | 15.09 |
| 498    | 2016 | -0.94 | 0 | 1.389179 | 1.9298175 | 21.78399 | 0.124175 | 60.66 |

|        |      |       |   |          |            |          |          |       |
|--------|------|-------|---|----------|------------|----------|----------|-------|
| 977    | 2016 | 0.744 | 0 | 1.389179 | 1.9298175  | 22.92925 | 0.071782 | 40.9  |
| 300479 | 2016 | 0.643 | 0 | 1.389179 | 1.9298175  | 20.10336 | 0.052575 | 45    |
| 600022 | 2016 | -0.72 | 0 | 1.389179 | 1.9298175  | 24.71992 | -0.02378 | 30.26 |
| 600022 | 2016 | -0.5  | 0 | 1.389179 | 1.9298175  | 24.71992 | -0.02378 | 30.26 |
| 2598   | 2016 | -0.5  | 0 | 1.389179 | 1.9298175  | 20.75317 | 0.073906 | 29.81 |
| 2117   | 2016 | -0.09 | 0 | 1.389179 | 1.9298175  | 21.51585 | 0.149273 | 15.09 |
| 2117   | 2016 | -0.34 | 0 | 1.389179 | 1.9298175  | 21.51585 | 0.149273 | 15.09 |
| 2339   | 2016 | 0.837 | 0 | 1.389179 | 1.9298175  | 21.795   | 0.063133 | 7.84  |
| 977    | 2016 | 0.588 | 0 | 1.389179 | 1.9298175  | 22.92925 | 0.071782 | 40.9  |
| 977    | 2016 | 0.744 | 0 | 1.389179 | 1.9298175  | 22.92925 | 0.071782 | 40.9  |
| 600350 | 2016 | -0.34 | 0 | 1.389179 | 1.9298175  | 24.53945 | 0.115726 | 70.91 |
| 977    | 2016 | 1.172 | 0 | 1.389179 | 1.9298175  | 22.92925 | 0.071782 | 40.9  |
| 300443 | 2016 | -0.58 | 0 | 1.389179 | 1.9298175  | 21.27137 | 0.138658 | 43.13 |
| 2117   | 2016 | 0.074 | 0 | 1.389179 | 1.9298175  | 21.51585 | 0.149273 | 15.09 |
| 600350 | 2016 | -0.34 | 0 | 1.389179 | 1.9298175  | 24.53945 | 0.115726 | 70.91 |
| 977    | 2016 | 1.36  | 0 | 1.389179 | 1.9298175  | 22.92925 | 0.071782 | 40.9  |
| 2117   | 2016 | 0.049 | 0 | 1.389179 | 1.9298175  | 21.51585 | 0.149273 | 15.09 |
| 2598   | 2016 | -0.5  | 0 | 1.389179 | 1.9298175  | 20.75317 | 0.073906 | 29.81 |
| 300479 | 2016 | 0.643 | 0 | 1.389179 | 1.9298175  | 20.10336 | 0.052575 | 45    |
| 600022 | 2016 | -0.43 | 0 | 1.389179 | 1.9298175  | 24.71992 | -0.02378 | 30.26 |
| 977    | 2016 | 0.776 | 0 | 1.389179 | 1.9298175  | 22.92925 | 0.071782 | 40.9  |
| 600547 | 2016 | -0.65 | 0 | 1.389179 | 1.9298175  | 24.06815 | 0.080075 | 44.8  |
| 2117   | 2016 | -0.09 | 0 | 1.389179 | 1.9298175  | 21.51585 | 0.149273 | 15.09 |
| 2117   | 2016 | -0.34 | 0 | 1.389179 | 1.9298175  | 21.51585 | 0.149273 | 15.09 |
| 600547 | 2016 | -0.65 | 0 | 1.389179 | 1.9298175  | 24.06815 | 0.080075 | 44.8  |
| 2078   | 2016 | -0.21 | 0 | 0.148819 | 0.02214711 | 23.72866 | 0.138874 | 48.4  |
| 680    | 2016 | -0.25 | 0 | 0.148819 | 0.02214711 | 22.9025  | 0.005024 | 27.62 |
| 2193   | 2016 | -0.68 | 0 | 0.148819 | 0.02214711 | 22.01848 | 0.01319  | 16.07 |
| 2580   | 2016 | 0.23  | 0 | 0.148819 | 0.02214711 | 21.43913 | 0.045077 | 9.59  |
| 600789 | 2016 | -0.36 | 0 | 0.148819 | 0.02214711 | 22.15311 | 0.014887 | 24.59 |
| 2193   | 2016 | -0.47 | 0 | 0.148819 | 0.02214711 | 22.21044 | 0.01319  | 16.07 |
| 600789 | 2016 | -0.49 | 0 | 0.148819 | 0.02214711 | 22.15311 | 0.014887 | 24.59 |
| 2193   | 2016 | -0.5  | 0 | 0.148819 | 0.02214711 | 22.21044 | 0.01319  | 16.07 |
| 2580   | 2016 | 0.23  | 0 | 0.148819 | 0.02214711 | 21.43231 | 0.045077 | 9.59  |
| 680    | 2016 | -0.26 | 0 | 0.148819 | 0.02214711 | 22.94919 | 0.005024 | 27.62 |
| 2078   | 2016 | -0.15 | 0 | 0.148819 | 0.02214711 | 23.72866 | 0.138874 | 48.4  |
| 600789 | 2016 | -0.55 | 0 | 0.148819 | 0.02214711 | 21.99981 | 0.014887 | 24.59 |
| 2078   | 2016 | -0.27 | 0 | 0.148819 | 0.02214711 | 23.72866 | 0.138874 | 48.4  |
| 600789 | 2016 | -0.35 | 0 | 0.148819 | 0.02214711 | 22.15311 | 0.014887 | 24.59 |
| 600789 | 2016 | -0.6  | 0 | 0.148819 | 0.02214711 | 22.15311 | 0.014887 | 24.59 |
| 680    | 2016 | -0.57 | 0 | 0.148819 | 0.02214711 | 22.94919 | 0.005024 | 27.62 |
| 2193   | 2016 | -0.47 | 0 | 0.148819 | 0.02214711 | 22.21044 | 0.01319  | 16.07 |
| 680    | 2016 | -0.26 | 0 | 0.148819 | 2.21E-02   | 22.94919 | 0.005024 | 27.62 |
| 2078   | 2016 | 0.503 | 0 | 0.148819 | 2.21E-02   | 23.72866 | 0.138874 | 48.4  |
| 2078   | 2016 | -0.35 | 0 | 0.148819 | 2.21E-02   | 23.72866 | 0.138874 | 48.4  |
| 2193   | 2016 | -0.47 | 0 | 0.148819 | 2.21E-02   | 22.21044 | 0.01319  | 16.07 |
| 680    | 2016 | -0.15 | 0 | 0.148819 | 2.21E-02   | 22.94919 | 0.005024 | 27.62 |
| 680    | 2016 | -0.1  | 0 | 0.148819 | 2.21E-02   | 22.94919 | 0.005024 | 27.62 |
| 680    | 2016 | -0.26 | 0 | 0.148819 | 2.21E-02   | 22.94919 | 0.005024 | 27.62 |
| 2078   | 2016 | 0.503 | 0 | 0.148819 | 2.21E-02   | 23.72866 | 0.138874 | 48.4  |
| 600789 | 2016 | -0.03 | 0 | 0.148819 | 0.02214711 | 22.15311 | 0.014887 | 24.59 |
| 2078   | 2016 | -0.35 | 0 | 0.148819 | 0.02214711 | 23.43288 | 0.138874 | 48.4  |
| 2193   | 2016 | -0.46 | 0 | 0.148819 | 0.02214711 | 22.21044 | 0.01319  | 16.07 |
| 2193   | 2016 | -0.68 | 0 | 0.148819 | 0.02214711 | 22.21044 | 0.01319  | 16.07 |

|        |      |       |      |          |            |          |          |       |
|--------|------|-------|------|----------|------------|----------|----------|-------|
| 2580   | 2016 | 0.23  | 0    | 0.148819 | 0.02214711 | 21.43913 | 0.045077 | 9.59  |
| 2193   | 2016 | -0.46 | 0    | 0.148819 | 0.02214711 | 22.21044 | 0.01319  | 16.07 |
| 2078   | 2016 | 0.137 | 0    | 0.148819 | 0.02214711 | 23.72866 | 0.138874 | 48.4  |
| 2078   | 2016 | -0.27 | 0    | 0.148819 | 0.02214711 | 23.72866 | 0.138874 | 48.4  |
| 600789 | 2016 | -0.6  | 0    | 0.148819 | 0.02214711 | 22.15311 | 0.014887 | 24.59 |
| 600789 | 2016 | -0.03 | 0    | 0.148819 | 2.21E-02   | 22.15311 | 0.014887 | 24.59 |
| 300437 | 2016 | -0.68 | 0.03 | 1.644662 | 2.70E+00   | 21.12425 | 0.038371 | 43.64 |
| 300437 | 2016 | -0.39 | 0.03 | 1.644662 | 2.70E+00   | 21.12425 | 0.038371 | 43.64 |
| 300437 | 2016 | -0.68 | 0.03 | 1.644662 | 2.70E+00   | 20.99802 | 0.038371 | 43.64 |
| 300437 | 2016 | -0.44 | 0.03 | 1.644662 | 2.70E+00   | 21.12425 | 0.038371 | 43.64 |
| 300437 | 2016 | -0.29 | 0.03 | 1.644662 | 2.70E+00   | 21.12425 | 0.038371 | 43.64 |
| 300437 | 2016 | -0.39 | 0.03 | 1.644662 | 2.7049131  | 21.12425 | 0.038371 | 43.64 |
| 300437 | 2016 | -0.29 | 0.03 | 1.644662 | 2.7049131  | 20.99802 | 0.038371 | 43.64 |
| 600783 | 2016 | 0.374 | 0    | 1.344196 | 1.8068623  | 21.92707 | 0.097374 | 68.53 |
| 2088   | 2016 | 0.625 | 0    | 1.344196 | 1.8068623  | 21.46883 | 0.062161 | 29    |
| 600783 | 2016 | -0.66 | 0    | 1.344196 | 1.8068623  | 21.92707 | 0.097374 | 68.53 |
| 600783 | 2016 | 0.374 | 0    | 1.344196 | 1.8068623  | 21.92707 | 0.097374 | 68.53 |
| 600783 | 2016 | 0.374 | 0    | 1.344196 | 1.8068623  | 21.92707 | 0.097374 | 68.53 |
| 600783 | 2016 | -0.06 | 0    | 1.344196 | 1.8068623  | 21.92707 | 0.097374 | 68.53 |
| 600586 | 2016 | 0.651 | 0    | 1.344196 | 1.8068623  | 22.97552 | 0.004614 | 31.37 |
| 600783 | 2016 | -0.06 | 0    | 1.344196 | 1.8068623  | 21.92707 | 0.097374 | 68.53 |
| 726    | 2016 | 0.087 | 0    | 1.344196 | 1.8068623  | 22.96473 | 0.115077 | 15.21 |
| 600783 | 2016 | -0.06 | 0    | 1.344196 | 1.8068623  | 21.92707 | 0.097374 | 68.53 |
| 2382   | 2016 | -0.64 | 0    | 1.344196 | 1.8068623  | 21.18512 | 0.138705 | 29.72 |
| 600586 | 2016 | -0.67 | 0    | 1.344196 | 1.8068623  | 22.97552 | 0.004614 | 31.37 |
| 600783 | 2016 | 0.227 | 0    | 1.344196 | 1.8068623  | 21.92707 | 0.097374 | 68.53 |
| 2469   | 2016 | 0.263 | 0    | 1.344196 | 1.8068623  | 21.14613 | 0.014439 | 23.1  |
| 2671   | 2016 | -0.46 | 0    | 1.344196 | 1.8068623  | 21.95966 | 0.011591 | 27.03 |
| 300233 | 2016 | 0.55  | 0    | 1.344196 | 1.8068623  | 21.53725 | 0.103874 | 37.58 |
| 600587 | 2016 | -0.34 | 0    | 1.344196 | 1.8068623  | 23.15409 | 0.030021 | 28.77 |
| 2521   | 2016 | 0.328 | 0    | 1.344196 | 1.8068623  | 22.16392 | 0.041689 | 16.31 |
| 300233 | 2016 | 0.769 | 0    | 1.344196 | 1.8068623  | 21.53725 | 0.103874 | 37.58 |
| 600587 | 2016 | -0.09 | 0    | 1.344196 | 1.8068623  | 23.15409 | 0.030021 | 28.77 |
| 2382   | 2016 | -0.17 | 0    | 1.344196 | 1.8068623  | 21.18512 | 0.138705 | 29.72 |
| 300233 | 2016 | 0.769 | 0    | 1.344196 | 1.8068623  | 21.53725 | 0.103874 | 37.58 |
| 600783 | 2016 | -0.06 | 0    | 1.344196 | 1.8068623  | 21.92707 | 0.097374 | 68.53 |
| 600783 | 2016 | -0.06 | 0    | 1.344196 | 1.8068623  | 21.92707 | 0.097374 | 68.53 |
| 600586 | 2016 | -0.5  | 0    | 1.344196 | 1.8068623  | 22.62773 | 0.004614 | 31.37 |
| 2469   | 2016 | 0.895 | 0    | 1.344196 | 1.8068623  | 21.14613 | 0.014439 | 23.1  |
| 600586 | 2016 | -0.67 | 0    | 1.344196 | 1.8068623  | 22.97552 | 0.004614 | 31.37 |
| 600587 | 2016 | -0.75 | 0    | 1.344196 | 1.8068623  | 23.15409 | 0.030021 | 28.77 |
| 2408   | 2016 | 0.046 | 0    | 1.344196 | 1.8068623  | 22.86925 | 0.085764 | 52.37 |
| 300233 | 2016 | 0.769 | 0    | 1.344196 | 1.8068623  | 21.53725 | 0.103874 | 37.58 |
| 2408   | 2016 | 0.046 | 0    | 1.344196 | 1.8068623  | 22.86925 | 0.085764 | 52.37 |
| 600587 | 2016 | -0.34 | 0    | 1.344196 | 1.8068623  | 23.15409 | 0.030021 | 28.77 |
| 726    | 2016 | 0.139 | 0    | 1.344196 | 1.8068623  | 22.69591 | 0.115077 | 15.21 |
| 600587 | 2016 | -0.51 | 0    | 1.344196 | 1.8068623  | 23.15409 | 0.030021 | 28.77 |
| 600587 | 2016 | 0.577 | 0    | 1.344196 | 1.8068623  | 23.15409 | 0.030021 | 28.77 |
| 600587 | 2016 | -0.34 | 0    | 1.344196 | 1.8068623  | 23.15409 | 0.030021 | 28.77 |
| 600783 | 2016 | -0.06 | 0    | 1.344196 | 1.8068623  | 21.92707 | 0.097374 | 68.53 |
| 2408   | 2016 | 0.046 | 0    | 1.344196 | 1.8068623  | 22.86925 | 0.085764 | 52.37 |
| 600587 | 2016 | 0.43  | 0    | 1.344196 | 1.81E+00   | 23.15409 | 0.030021 | 28.77 |
| 2469   | 2016 | 1.256 | 0    | 1.344196 | 1.81E+00   | 20.99374 | 0.014439 | 23.1  |
| 726    | 2016 | 0.087 | 0    | 1.344196 | 1.81E+00   | 22.69591 | 0.115077 | 15.21 |

|        |      |       |   |          |           |          |          |       |
|--------|------|-------|---|----------|-----------|----------|----------|-------|
| 2581   | 2016 | -0.64 | 0 | 1.344196 | 1.81E+00  | 21.71189 | 0.164801 | 26.38 |
| 2671   | 2016 | 0.034 | 0 | 1.344196 | 1.81E+00  | 21.95966 | 0.011591 | 27.03 |
| 2088   | 2016 | -0.61 | 0 | 1.344196 | 1.81E+00  | 21.47331 | 0.062161 | 29    |
| 2469   | 2016 | 0.263 | 0 | 1.344196 | 1.81E+00  | 21.14613 | 0.014439 | 23.1  |
| 600587 | 2016 | -0.34 | 0 | 1.344196 | 1.81E+00  | 23.15409 | 0.030021 | 28.77 |
| 600587 | 2016 | -0.75 | 0 | 1.344196 | 1.81E+00  | 23.15409 | 0.030021 | 28.77 |
| 2671   | 2016 | -0.46 | 0 | 1.344196 | 1.81E+00  | 21.95966 | 0.011591 | 27.03 |
| 600587 | 2016 | -0.34 | 0 | 1.344196 | 1.8068623 | 23.15409 | 0.030021 | 28.77 |
| 300233 | 2016 | 0.693 | 0 | 1.344196 | 1.8068623 | 21.53725 | 0.103874 | 37.58 |
| 600587 | 2016 | -0.47 | 0 | 1.344196 | 1.8068623 | 23.15409 | 0.030021 | 28.77 |
| 2469   | 2016 | 1.256 | 0 | 1.344196 | 1.8068623 | 21.14613 | 0.014439 | 23.1  |
| 2382   | 2016 | -0.39 | 0 | 1.344196 | 1.8068623 | 21.18512 | 0.138705 | 29.72 |
| 2408   | 2016 | 0.046 | 0 | 1.344196 | 1.8068623 | 22.79697 | 0.085764 | 52.37 |
| 600783 | 2016 | -0.06 | 0 | 1.344196 | 1.8068623 | 21.92707 | 0.097374 | 68.53 |
| 2088   | 2016 | -0.61 | 0 | 1.344196 | 1.8068623 | 21.47331 | 0.062161 | 29    |
| 600783 | 2016 | -0.06 | 0 | 1.344196 | 1.8068623 | 21.92707 | 0.097374 | 68.53 |
| 300233 | 2016 | 0.311 | 0 | 1.344196 | 1.8068623 | 21.53725 | 0.103874 | 37.58 |
| 600587 | 2016 | -0.75 | 0 | 1.344196 | 1.8068623 | 23.15409 | 0.030021 | 28.77 |
| 2088   | 2016 | -0.61 | 0 | 1.344196 | 1.8068623 | 21.47331 | 0.062161 | 29    |
| 2382   | 2016 | -0.64 | 0 | 1.344196 | 1.8068623 | 21.18512 | 0.138705 | 29.72 |
| 2581   | 2016 | 0.68  | 0 | 1.344196 | 1.8068623 | 21.71189 | 0.164801 | 26.38 |
| 2581   | 2016 | 0.533 | 0 | 1.344196 | 1.8068623 | 21.71189 | 0.164801 | 26.38 |
| 2382   | 2016 | -0.64 | 0 | 1.344196 | 1.8068623 | 21.18512 | 0.138705 | 29.72 |
| 2382   | 2016 | -0.64 | 0 | 1.344196 | 1.8068623 | 20.82127 | 0.138705 | 29.72 |
| 2671   | 2016 | -0.41 | 0 | 1.344196 | 1.8068623 | 21.93952 | 0.011591 | 27.03 |
| 300233 | 2016 | 0.584 | 0 | 1.344196 | 1.8068623 | 21.53725 | 0.103874 | 37.58 |
| 300233 | 2016 | 0.083 | 0 | 1.344196 | 1.8068623 | 21.53725 | 0.103874 | 37.58 |
| 2581   | 2016 | 0.68  | 0 | 1.344196 | 1.8068623 | 21.71189 | 0.164801 | 26.38 |
| 600783 | 2016 | -0.59 | 0 | 1.344196 | 1.8068623 | 21.92707 | 0.097374 | 68.53 |
| 600783 | 2016 | -0.06 | 0 | 1.344196 | 1.8068623 | 21.92707 | 0.097374 | 68.53 |
| 300233 | 2016 | 0.426 | 0 | 1.344196 | 1.8068623 | 21.53725 | 0.103874 | 37.58 |
| 600586 | 2016 | -0.18 | 0 | 1.344196 | 1.8068623 | 22.97552 | 0.004614 | 31.37 |
| 2088   | 2016 | 0.625 | 0 | 1.344196 | 1.8068623 | 21.47331 | 0.062161 | 29    |
| 600586 | 2016 | -0.54 | 0 | 1.344196 | 1.8068623 | 22.97552 | 0.004614 | 31.37 |
| 2382   | 2016 | -0.64 | 0 | 1.344196 | 1.8068623 | 21.18512 | 0.138705 | 29.72 |
| 600529 | 2016 | -0.23 | 0 | 1.344196 | 1.8068623 | 22.05577 | 0.062113 | 15.66 |
| 600783 | 2016 | 0.031 | 0 | 1.344196 | 1.8068623 | 21.92707 | 0.097374 | 68.53 |
| 2581   | 2016 | 0.68  | 0 | 1.344196 | 1.8068623 | 21.71189 | 0.164801 | 26.38 |
| 600586 | 2016 | -0.18 | 0 | 1.344196 | 1.8068623 | 22.97552 | 0.004614 | 31.37 |
| 2671   | 2016 | 0.034 | 0 | 1.344196 | 1.8068623 | 21.95966 | 0.011591 | 27.03 |
| 600783 | 2016 | -0.57 | 0 | 1.344196 | 1.8068623 | 21.92707 | 0.097374 | 68.53 |
| 2521   | 2016 | 0.328 | 0 | 1.344196 | 1.8068623 | 22.16392 | 0.041689 | 16.31 |
| 600783 | 2016 | 0.031 | 0 | 1.344196 | 1.8068623 | 21.92707 | 0.097374 | 68.53 |
| 600587 | 2016 | -0.56 | 0 | 1.344196 | 1.8068623 | 23.15409 | 0.030021 | 28.77 |
| 600783 | 2016 | -0.06 | 0 | 1.344196 | 1.8068623 | 21.92707 | 0.097374 | 68.53 |
| 600586 | 2016 | -0.67 | 0 | 1.344196 | 1.8068623 | 22.97552 | 0.004614 | 31.37 |
| 600529 | 2016 | -0.23 | 0 | 1.344196 | 1.8068623 | 22.08533 | 0.062113 | 15.66 |
| 600783 | 2016 | -0.06 | 0 | 1.344196 | 1.8068623 | 21.92707 | 0.097374 | 68.53 |
| 2408   | 2016 | 0.046 | 0 | 1.344196 | 1.8068623 | 22.86925 | 0.085764 | 52.37 |
| 2088   | 2016 | -0.61 | 0 | 1.344196 | 1.8068623 | 21.47331 | 0.062161 | 29    |
| 2581   | 2016 | 0.68  | 0 | 1.344196 | 1.8068623 | 21.71189 | 0.164801 | 26.38 |
| 300233 | 2016 | 0.518 | 0 | 1.344196 | 1.8068623 | 21.12282 | 0.103874 | 37.58 |
| 726    | 2016 | 0.117 | 0 | 1.344196 | 1.8068623 | 22.69591 | 0.115077 | 15.21 |
| 2382   | 2016 | -0.64 | 0 | 1.344196 | 1.8068623 | 21.18512 | 0.138705 | 29.72 |



|        |      |       |      |          |            |          |          |       |
|--------|------|-------|------|----------|------------|----------|----------|-------|
| 2521   | 2016 | 0.328 | 0    | 1.344196 | 1.8068623  | 22.16392 | 0.041689 | 16.31 |
| 600783 | 2016 | -0.07 | 0    | 1.344196 | 1.8068623  | 21.92707 | 0.097374 | 68.53 |
| 600587 | 2016 | -0.34 | 0    | 1.344196 | 1.8068623  | 23.15409 | 0.030021 | 28.77 |
| 600783 | 2016 | 0.237 | 0    | 1.344196 | 1.8068623  | 21.92707 | 0.097374 | 68.53 |
| 600587 | 2016 | -0.5  | 0    | 1.344196 | 1.8068623  | 23.15409 | 0.030021 | 28.77 |
| 2469   | 2016 | 1.256 | 0    | 1.344196 | 1.8068623  | 21.14613 | 0.014439 | 23.1  |
| 2469   | 2016 | 1.256 | 0    | 1.344196 | 1.8068623  | 21.14613 | 0.014439 | 23.1  |
| 600783 | 2016 | 0.374 | 0    | 1.344196 | 1.8068623  | 21.92707 | 0.097374 | 68.53 |
| 600783 | 2016 | -0.06 | 0    | 1.344196 | 1.8068623  | 21.92707 | 0.097374 | 68.53 |
| 600587 | 2016 | -0.47 | 0    | 1.344196 | 1.8068623  | 23.15409 | 0.030021 | 28.77 |
| 600529 | 2016 | -0.23 | 0    | 1.344196 | 1.8068623  | 22.08533 | 0.062113 | 15.66 |
| 300233 | 2016 | 0.083 | 0    | 1.344196 | 1.8068623  | 21.53725 | 0.103874 | 37.58 |
| 2521   | 2016 | 0.328 | 0    | 1.344196 | 1.8068623  | 21.89003 | 0.041689 | 16.31 |
| 600587 | 2016 | -0.75 | 0    | 1.344196 | 1.8068623  | 23.15409 | 0.030021 | 28.77 |
| 2408   | 2016 | 0.046 | 0    | 1.344196 | 1.8068623  | 22.86925 | 0.085764 | 52.37 |
| 2581   | 2016 | 0.68  | 0    | 1.344196 | 1.8068623  | 21.71189 | 0.164801 | 26.38 |
| 2382   | 2016 | -0.17 | 0    | 1.344196 | 1.8068623  | 21.18512 | 0.138705 | 29.72 |
| 600783 | 2016 | 0.273 | 0    | 1.344196 | 1.8068623  | 22.45189 | 0.097374 | 68.53 |
| 2088   | 2016 | 0.143 | 0    | 1.344196 | 1.8068623  | 21.47331 | 0.062161 | 29    |
| 600587 | 2016 | -0.29 | 0    | 1.344196 | 1.8068623  | 22.68556 | 0.030021 | 28.77 |
| 726    | 2016 | 0.139 | 0    | 1.344196 | 1.8068623  | 22.69591 | 0.115077 | 15.21 |
| 600529 | 2016 | -0.23 | 0    | 1.344196 | 1.8068623  | 22.08533 | 0.062113 | 15.66 |
| 600587 | 2016 | -0.34 | 0    | 1.344196 | 1.8068623  | 23.15409 | 0.030021 | 28.77 |
| 2521   | 2016 | 0.328 | 0    | 1.344196 | 1.8068623  | 22.16392 | 0.041689 | 16.31 |
| 600783 | 2016 | -0.07 | 0    | 1.344196 | 1.8068623  | 21.92707 | 0.097374 | 68.53 |
| 2581   | 2016 | 0.349 | 0    | 1.344196 | 1.8068623  | 22.10652 | 0.164801 | 26.38 |
| 600587 | 2016 | -0.51 | 0    | 1.344196 | 1.8068623  | 23.15409 | 0.030021 | 28.77 |
| 600529 | 2016 | -0.23 | 0    | 1.344196 | 1.8068623  | 22.08533 | 0.062113 | 15.66 |
| 600587 | 2016 | -0.43 | 0    | 1.344196 | 1.8068623  | 23.15409 | 0.030021 | 28.77 |
| 600783 | 2016 | -0.36 | 0    | 1.344196 | 1.8068623  | 21.92707 | 0.097374 | 68.53 |
| 300452 | 2016 | 0.659 | 0.03 | 0.0066   | 0.00004356 | 20.10336 | 0.121145 | 26.69 |
| 300452 | 2016 | 0.659 | 0.03 | 0.0066   | 0.00004356 | 20.10336 | 0.121145 | 26.69 |
| 300452 | 2016 | 0.659 | 0.03 | 0.0066   | 0.00004356 | 20.10336 | 0.121145 | 26.69 |
| 603369 | 2016 | -0.08 | 0.01 | 0.096004 | 0.00921669 | 22.40556 | 0.163054 | 44.72 |
| 603299 | 2016 | 0.04  | 0.01 | 0.096004 | 0.00921669 | 22.22306 | 0.010492 | 48.83 |
| 603369 | 2016 | -0.73 | 0.01 | 0.096004 | 0.00921669 | 22.54436 | 0.163054 | 44.72 |
| 603369 | 2016 | -0.73 | 0.01 | 0.096004 | 0.00921669 | 22.54436 | 0.163054 | 44.72 |
| 603369 | 2016 | -0.08 | 0.01 | 0.096004 | 0.00921669 | 22.54436 | 0.163054 | 44.72 |
| 603299 | 2016 | 0.703 | 0.01 | 0.096004 | 0.00921669 | 22.22306 | 0.010492 | 48.83 |
| 603299 | 2016 | 0.198 | 0.01 | 0.096004 | 0.00921669 | 22.15255 | 0.010492 | 48.83 |
| 603299 | 2016 | 0.513 | 0.01 | 0.096004 | 0.00921669 | 22.22306 | 0.010492 | 48.83 |
| 603369 | 2016 | -0.23 | 0.01 | 0.096004 | 0.00921669 | 22.54436 | 0.163054 | 44.72 |
| 603299 | 2016 | 0.04  | 0.01 | 0.096004 | 0.00921669 | 22.22306 | 0.010492 | 48.83 |
| 603299 | 2016 | 0.703 | 0.01 | 0.096004 | 0.00921669 | 22.22306 | 0.010492 | 48.83 |
| 603299 | 2016 | 0.482 | 0.01 | 0.096004 | 0.00921669 | 22.22306 | 0.010492 | 48.83 |
| 300207 | 2016 | -0.6  | 0.05 | 1.011601 | 1.0233364  | 22.8672  | 0.189625 | 33.79 |
| 2138   | 2016 | -0.16 | 0.05 | 1.011601 | 1.0233364  | 22.08846 | 0.134333 | 11.74 |
| 300115 | 2016 | 0.14  | 0.05 | 1.011601 | 1.0233364  | 22.82527 | 0.167006 | 47.19 |
| 39     | 2016 | -0.24 | 0.05 | 1.011601 | 1.0233364  | 25.54849 | 0.018781 | 55.44 |
| 39     | 2016 | -0.4  | 0.05 | 1.011601 | 1.0233364  | 25.54849 | 0.018781 | 55.44 |
| 600380 | 2016 | 0.771 | 0.05 | 1.011601 | 1.0233364  | 23.50033 | 0.104385 | 46.78 |
| 300457 | 2016 | -0.1  | 0.05 | 1.011601 | 1.0233364  | 21.30455 | 0.199897 | 45.27 |
| 39     | 2016 | -0.44 | 0.05 | 1.011601 | 1.0233364  | 25.54849 | 0.018781 | 55.44 |
| 2055   | 2016 | -0.62 | 0.05 | 1.011601 | 1.0233364  | 22.67478 | -0.00771 | 31.03 |

|        |      |       |      |          |           |          |          |       |
|--------|------|-------|------|----------|-----------|----------|----------|-------|
| 2340   | 2016 | -0.68 | 0.05 | 1.011601 | 1.0233364 | 23.6715  | 0.041603 | 12.54 |
| 68     | 2016 | 0.453 | 0.05 | 1.011601 | 1.0233364 | 20.62074 | 0.010892 | 26.43 |
| 9      | 2016 | 0.595 | 0.05 | 1.011601 | 1.0233364 | 23.79702 | -0.02796 | 11.91 |
| 300319 | 2016 | -0.7  | 0.05 | 1.011601 | 1.0233364 | 21.86227 | 0.068369 | 27.44 |
| 2672   | 2016 | -0.64 | 0.05 | 1.011601 | 1.0233364 | 22.82608 | 0.149297 | 22.56 |
| 2121   | 2016 | 0.142 | 0.05 | 1.011601 | 1.0233364 | 23.22664 | 0.099215 | 40.95 |
| 2388   | 2016 | -0.17 | 0.05 | 1.011601 | 1.0233364 | 20.95417 | 0.016977 | 48.09 |
| 63     | 2016 | 0.26  | 0.05 | 1.011601 | 1.0233364 | 25.67656 | -0.19898 | 30.35 |
| 68     | 2016 | 1.142 | 0.05 | 1.011601 | 1.0233364 | 20.62074 | 0.010892 | 26.43 |
| 300124 | 2016 | 0.334 | 0.05 | 1.011601 | 1.0233364 | 22.3219  | 0.196731 | 19.26 |
| 2139   | 2016 | -0.39 | 0.05 | 1.011601 | 1.0233364 | 21.72216 | 0.083375 | 19.61 |
| 300134 | 2016 | -0.26 | 0.05 | 1.011601 | 1.0233364 | 22.77646 | 0.021913 | 43.39 |
| 300077 | 2016 | 2.238 | 0.05 | 1.011601 | 1.0233364 | 21.91542 | 0.03416  | 7.84  |
| 300124 | 2016 | 0.332 | 0.05 | 1.011601 | 1.0233364 | 22.3219  | 0.196731 | 19.26 |
| 2421   | 2016 | -0.24 | 0.05 | 1.011601 | 1.0233364 | 22.29824 | 0.099328 | 20.77 |
| 300115 | 2016 | 0.543 | 0.05 | 1.011601 | 1.0233364 | 22.82527 | 0.167006 | 47.19 |
| 300124 | 2016 | 0.454 | 0.05 | 1.011601 | 1.0233364 | 22.3219  | 0.196731 | 19.26 |
| 600380 | 2016 | 0.771 | 0.05 | 1.011601 | 1.0233364 | 22.4202  | 0.104385 | 46.78 |
| 999    | 2016 | -0.81 | 0.05 | 1.011601 | 1.0233364 | 23.32978 | 0.138483 | 63.6  |
| 68     | 2016 | 0.258 | 0.05 | 1.011601 | 1.0233364 | 20.99613 | 0.010892 | 26.43 |
| 70     | 2016 | -0.05 | 0.05 | 1.011601 | 1.0233364 | 22.34572 | 0.032292 | 39.18 |
| 2168   | 2016 | -0.33 | 0.05 | 1.011601 | 1.0233364 | 21.47841 | 0.056051 | 9.96  |
| 2170   | 2016 | 0.404 | 0.05 | 1.011601 | 1.0233364 | 22.15743 | 0.024766 | 27.07 |
| 300112 | 2016 | -0.29 | 0.05 | 1.011601 | 1.0233364 | 20.66041 | 0.03708  | 21.72 |
| 2294   | 2016 | 0.327 | 0.05 | 1.011601 | 1.0233364 | 22.60031 | 0.254583 | 67.73 |
| 300115 | 2016 | 0.306 | 0.05 | 1.011601 | 1.0233364 | 22.82527 | 0.167006 | 47.19 |
| 2766   | 2016 | -0.12 | 0.05 | 1.011601 | 1.0233364 | 21.30138 | -0.0713  | 48.49 |
| 21     | 2016 | -0.37 | 0.05 | 1.011601 | 1.0233364 | 23.18434 | 0.042237 | 44.51 |
| 16     | 2016 | -0.84 | 0.05 | 1.011601 | 1.0233364 | 23.57068 | 0.027776 | 21.75 |
| 300115 | 2016 | 0.196 | 0.05 | 1.011601 | 1.0233364 | 22.82527 | 0.167006 | 47.19 |
| 19     | 2016 | 0.539 | 0.05 | 1.011601 | 1.0233364 | 20.88755 | 0.085874 | 19.09 |
| 21     | 2016 | -0.34 | 0.05 | 1.011601 | 1.0233364 | 22.75481 | 0.042237 | 44.51 |
| 28     | 2016 | 0.507 | 0.05 | 1.011601 | 1.0233364 | 23.78257 | 0.081732 | 51    |
| 300112 | 2016 | -0.29 | 0.05 | 1.011601 | 1.0233364 | 20.66041 | 0.03708  | 21.72 |
| 300241 | 2016 | -0.28 | 0.05 | 1.011601 | 1.0233364 | 21.36223 | 0.048855 | 26.52 |
| 2618   | 2016 | 1.348 | 0.05 | 1.011601 | 1.0233364 | 21.58693 | 0.014728 | 30.18 |
| 9      | 2016 | -0.4  | 0.05 | 1.011601 | 1.0233364 | 23.79702 | -0.02796 | 11.91 |
| 2191   | 2016 | -0.09 | 0.05 | 1.011601 | 1.0233364 | 22.62249 | 0.132569 | 32.73 |
| 603808 | 2016 | -0.01 | 0.05 | 1.011601 | 1.0233364 | 21.55204 | 0.122897 | 61.99 |
| 300052 | 2016 | 1.537 | 0.05 | 1.011601 | 1.0233364 | 20.92691 | -0.06717 | 27.28 |
| 300206 | 2016 | 1.619 | 0.05 | 1.011601 | 1.0233364 | 21.10676 | 0.01588  | 20.86 |
| 2733   | 2016 | -0.07 | 0.05 | 1.011601 | 1.0233364 | 21.66658 | 0.054154 | 36.26 |
| 68     | 2016 | 0.038 | 0.05 | 1.011601 | 1.0233364 | 20.62074 | 0.010892 | 26.43 |
| 2008   | 2016 | -0.06 | 0.05 | 1.011601 | 1.0233364 | 23.06213 | 0.135965 | 17.64 |
| 2475   | 2016 | 1E-03 | 0.05 | 1.011601 | 1.0233364 | 23.76563 | 0.097451 | 50.06 |
| 300124 | 2016 | 0.304 | 0.05 | 1.011601 | 1.0233364 | 22.3219  | 0.196731 | 19.26 |
| 2551   | 2016 | -0.67 | 0.05 | 1.011601 | 1.0233364 | 22.124   | 0.062795 | 41.91 |
| 300012 | 2016 | 0.354 | 0.05 | 1.011601 | 1.0233364 | 21.86193 | 0.04517  | 13.81 |
| 2163   | 2016 | -0.22 | 0.05 | 1.011601 | 1.0233364 | 22.63495 | -0.06801 | 13.74 |
| 300085 | 2016 | 1.458 | 0.05 | 1.011601 | 1.0233364 | 21.12303 | 0.09432  | 19.61 |
| 999    | 2016 | 0.346 | 0.05 | 1.011601 | 1.0233364 | 23.32978 | 0.138483 | 63.6  |
| 50     | 2016 | 0.517 | 0.05 | 1.011601 | 1.02E+00  | 23.79963 | 0.041368 | 20.81 |
| 300112 | 2016 | -0.29 | 0.05 | 1.011601 | 1.02E+00  | 20.66041 | 0.03708  | 21.72 |
| 2238   | 2016 | -0.49 | 0.05 | 1.011601 | 1.02E+00  | 22.05363 | 0.110719 | 57.77 |

|        |      |       |      |          |           |          |          |       |
|--------|------|-------|------|----------|-----------|----------|----------|-------|
| 2763   | 2016 | -0.39 | 0.05 | 1.011601 | 1.02E+00  | 21.40523 | 0.11964  | 35.6  |
| 2609   | 2016 | 0.865 | 0.05 | 1.011601 | 1.02E+00  | 21.62169 | 0.087596 | 35.42 |
| 2163   | 2016 | -0.22 | 0.05 | 1.011601 | 1.02E+00  | 22.63495 | -0.06801 | 13.74 |
| 2191   | 2016 | -0.23 | 0.05 | 1.011601 | 1.02E+00  | 22.62249 | 0.132569 | 32.73 |
| 300162 | 2016 | -0.37 | 0.05 | 1.011601 | 1.02E+00  | 21.12846 | 0.026709 | 22.53 |
| 300232 | 2016 | -0.33 | 0.05 | 1.011601 | 1.02E+00  | 21.68096 | 0.109479 | 43.28 |
| 32     | 2016 | -0.58 | 0.05 | 1.011601 | 1.02E+00  | 21.3397  | 0.029528 | 49.18 |
| 50     | 2016 | 0.589 | 0.05 | 1.011601 | 1.0233364 | 23.79963 | 0.041368 | 20.81 |
| 2388   | 2016 | -0.17 | 0.05 | 1.011601 | 1.0233364 | 20.95417 | 0.016977 | 48.09 |
| 300047 | 2016 | 1.299 | 0.05 | 1.011601 | 1.0233364 | 21.76592 | 0.066081 | 13.01 |
| 39     | 2016 | -0.15 | 0.05 | 1.011601 | 1.0233364 | 25.54849 | 0.018781 | 55.44 |
| 2735   | 2016 | 0.06  | 0.05 | 1.011601 | 1.0233364 | 20.10336 | 0.07888  | 54.23 |
| 300252 | 2016 | -0.08 | 0.05 | 1.011601 | 1.0233364 | 22.12533 | 0.096123 | 34.12 |
| 300193 | 2016 | 0.006 | 0.05 | 1.011601 | 1.0233364 | 21.63289 | 0.048537 | 19.66 |
| 2106   | 2016 | 0.457 | 0.05 | 1.011601 | 1.0233364 | 22.25953 | 0.059913 | 20.84 |
| 39     | 2016 | 0.203 | 0.05 | 1.011601 | 1.0233364 | 25.54849 | 0.018781 | 55.44 |
| 2130   | 2016 | -0.08 | 0.05 | 1.011601 | 1.0233364 | 22.4023  | 0.040041 | 24.64 |
| 300252 | 2016 | -0.13 | 0.05 | 1.011601 | 1.0233364 | 22.12533 | 0.096123 | 34.12 |
| 68     | 2016 | -0.18 | 0.05 | 1.011601 | 1.0233364 | 20.62074 | 0.010892 | 26.43 |
| 2551   | 2016 | -0.67 | 0.05 | 1.011601 | 1.0233364 | 21.63348 | 0.062795 | 41.91 |
| 300134 | 2016 | 0.284 | 0.05 | 1.011601 | 1.0233364 | 22.77646 | 0.021913 | 43.39 |
| 300197 | 2016 | -0.22 | 0.05 | 1.011601 | 1.0233364 | 23.16034 | 0.100676 | 40.74 |
| 2294   | 2016 | 0.327 | 0.05 | 1.011601 | 1.0233364 | 22.60031 | 0.254583 | 67.73 |
| 2008   | 2016 | 0.825 | 0.05 | 1.011601 | 1.0233364 | 23.06213 | 0.135965 | 17.64 |
| 300134 | 2016 | -0.48 | 0.05 | 1.011601 | 1.02E+00  | 22.77646 | 0.021913 | 43.39 |
| 2786   | 2016 | -0.24 | 0.05 | 1.011601 | 1.02E+00  | 21.86134 | 0.097421 | 35.74 |
| 60     | 2016 | -0.8  | 0.05 | 1.011601 | 1.02E+00  | 23.55466 | 0.069638 | 29.58 |
| 16     | 2016 | -0.58 | 0.05 | 1.011601 | 1.0233364 | 23.57068 | 0.027776 | 21.75 |
| 2456   | 2016 | 0.043 | 0.05 | 1.011601 | 1.0233364 | 23.87746 | 0.089165 | 19.28 |
| 2163   | 2016 | -0.22 | 0.05 | 1.011601 | 1.0233364 | 22.63495 | -0.06801 | 13.74 |
| 300303 | 2016 | 0.232 | 0.05 | 1.011601 | 1.0233364 | 21.78851 | 0.083451 | 22.94 |
| 2654   | 2016 | -0.2  | 0.05 | 1.011601 | 1.0233364 | 21.91507 | 0.066087 | 17.25 |
| 2475   | 2016 | -0.33 | 0.05 | 1.011601 | 1.0233364 | 23.76563 | 0.097451 | 50.06 |
| 300136 | 2016 | 0.318 | 0.05 | 1.011601 | 1.0233364 | 21.87485 | 0.268381 | 23.88 |
| 2388   | 2016 | -0.17 | 0.05 | 1.011601 | 1.0233364 | 20.95417 | 0.016977 | 48.09 |
| 603118 | 2016 | 0.145 | 0.05 | 1.011601 | 1.0233364 | 22.65879 | 0.079281 | 24.95 |
| 2482   | 2016 | -0.1  | 0.05 | 1.011601 | 1.0233364 | 23.48614 | 0.063532 | 38.18 |
| 28     | 2016 | 0.507 | 0.05 | 1.011601 | 1.0233364 | 23.78257 | 0.081732 | 51    |
| 300136 | 2016 | 0.071 | 0.05 | 1.011601 | 1.0233364 | 21.87485 | 0.268381 | 23.88 |
| 603118 | 2016 | -0.14 | 0.05 | 1.011601 | 1.0233364 | 22.65879 | 0.079281 | 24.95 |
| 2681   | 2016 | -0.19 | 0.05 | 1.011601 | 1.0233364 | 22.14544 | 0.136136 | 44.54 |
| 39     | 2016 | 0.138 | 0.05 | 1.011601 | 1.0233364 | 25.54849 | 0.018781 | 55.44 |
| 999    | 2016 | -0.81 | 0.05 | 1.011601 | 1.0233364 | 23.32978 | 0.138483 | 63.6  |
| 2548   | 2016 | 0.47  | 0.05 | 1.011601 | 1.0233364 | 21.9494  | 0.089097 | 40.95 |
| 2243   | 2016 | -0.12 | 0.05 | 1.011601 | 1.0233364 | 21.31653 | 0.022429 | 51.52 |
| 600380 | 2016 | 0.085 | 0.05 | 1.011601 | 1.0233364 | 23.50033 | 0.104385 | 46.78 |
| 999    | 2016 | 0.003 | 0.05 | 1.011601 | 1.0233364 | 23.32978 | 0.138483 | 63.6  |
| 2782   | 2016 | -0.79 | 0.05 | 1.011601 | 1.0233364 | 20.75777 | 0.07204  | 35.56 |
| 300199 | 2016 | 1.177 | 0.05 | 1.011601 | 1.0233364 | 22.21774 | 0.080987 | 25.82 |
| 300207 | 2016 | -0.45 | 0.05 | 1.011601 | 1.0233364 | 22.84299 | 0.189625 | 33.79 |
| 39     | 2016 | -0.51 | 0.05 | 1.011601 | 1.0233364 | 25.54849 | 0.018781 | 55.44 |
| 2052   | 2016 | 0.767 | 0.05 | 1.011601 | 1.0233364 | 21.36908 | -0.4336  | 16.5  |
| 2137   | 2016 | -0.76 | 0.05 | 1.011601 | 1.0233364 | 21.19053 | 0.093442 | 38.18 |
| 39     | 2016 | 0.203 | 0.05 | 1.011601 | 1.0233364 | 25.54849 | 0.018781 | 55.44 |

|        |      |       |      |          |           |          |          |       |
|--------|------|-------|------|----------|-----------|----------|----------|-------|
| 2341   | 2016 | -0.05 | 0.05 | 1.011601 | 1.0233364 | 22.56267 | 0.014917 | 27.04 |
| 2301   | 2016 | -0.57 | 0.05 | 1.011601 | 1.0233364 | 22.05791 | 0.083717 | 49.41 |
| 2660   | 2016 | -0.32 | 0.05 | 1.011601 | 1.0233364 | 21.54469 | 0.013342 | 30.34 |
| 300151 | 2016 | -0.57 | 0.05 | 1.011601 | 1.0233364 | 20.73055 | 0.039047 | 45.86 |
| 300151 | 2016 | -0.57 | 0.05 | 1.011601 | 1.0233364 | 20.5128  | 0.039047 | 45.86 |
| 2008   | 2016 | 0.069 | 0.05 | 1.011601 | 1.0233364 | 23.06213 | 0.135965 | 17.64 |
| 2303   | 2016 | -0.7  | 0.05 | 1.011601 | 1.0233364 | 22.29515 | 0.054002 | 42.44 |
| 2577   | 2016 | -0.17 | 0.05 | 1.011601 | 1.0233364 | 21.10419 | 0.000995 | 62.29 |
| 300012 | 2016 | -0.37 | 0.05 | 1.011601 | 1.0233364 | 21.86193 | 0.04517  | 13.81 |
| 2681   | 2016 | -0.05 | 0.05 | 1.011601 | 1.0233364 | 22.14544 | 0.136136 | 44.54 |
| 600380 | 2016 | 0.555 | 0.05 | 1.011601 | 1.0233364 | 23.50033 | 0.104385 | 46.78 |
| 39     | 2016 | -0.01 | 0.05 | 1.011601 | 1.0233364 | 25.54849 | 0.018781 | 55.44 |
| 300232 | 2016 | -0.2  | 0.05 | 1.011601 | 1.0233364 | 21.68096 | 0.109479 | 43.28 |
| 2055   | 2016 | 0.703 | 0.05 | 1.011601 | 1.0233364 | 22.67478 | -0.00771 | 31.03 |
| 39     | 2016 | 0.045 | 0.05 | 1.011601 | 1.0233364 | 25.54849 | 0.018781 | 55.44 |
| 300264 | 2016 | 1.328 | 0.05 | 1.011601 | 1.0233364 | 20.61357 | 0.010715 | 29.49 |
| 66     | 2016 | -0.19 | 0.05 | 1.011601 | 1.0233364 | 24.43344 | 0.022581 | 53.92 |
| 2421   | 2016 | 0.157 | 0.05 | 1.011601 | 1.0233364 | 22.29824 | 0.099328 | 20.77 |
| 300241 | 2016 | -0.03 | 0.05 | 1.011601 | 1.0233364 | 21.36223 | 0.048855 | 26.52 |
| 55     | 2016 | -0.46 | 0.05 | 1.011601 | 1.0233364 | 22.63828 | 0.187623 | 8.72  |
| 600525 | 2016 | 0.837 | 0.05 | 1.011601 | 1.0233364 | 23.47182 | 0.094461 | 7.84  |
| 55     | 2016 | 0.097 | 0.05 | 1.011601 | 1.0233364 | 22.63828 | 0.187623 | 8.72  |
| 300162 | 2016 | -0.37 | 0.05 | 1.011601 | 1.0233364 | 21.12846 | 0.026709 | 22.53 |
| 300012 | 2016 | -0.37 | 0.05 | 1.011601 | 1.0233364 | 21.86193 | 0.04517  | 13.81 |
| 2301   | 2016 | -0.54 | 0.05 | 1.011601 | 1.0233364 | 22.05791 | 0.083717 | 49.41 |
| 300227 | 2016 | -0.14 | 0.05 | 1.011601 | 1.0233364 | 20.35189 | 0.034836 | 19.62 |
| 2218   | 2016 | -0.34 | 0.05 | 1.011601 | 1.0233364 | 22.29269 | 0.047604 | 32.55 |
| 2429   | 2016 | -0.03 | 0.05 | 1.011601 | 1.0233364 | 23.23253 | 0.045673 | 54.5  |
| 300197 | 2016 | -0.11 | 0.05 | 1.011601 | 1.0233364 | 23.16034 | 0.100676 | 40.74 |
| 2121   | 2016 | 0.33  | 0.05 | 1.011601 | 1.0233364 | 23.22664 | 0.099215 | 40.95 |
| 300227 | 2016 | -0.59 | 0.05 | 1.011601 | 1.0233364 | 20.35189 | 0.034836 | 19.62 |
| 300227 | 2016 | 0.068 | 0.05 | 1.011601 | 1.0233364 | 20.35189 | 0.034836 | 19.62 |
| 39     | 2016 | 0.203 | 0.05 | 1.011601 | 1.0233364 | 25.54849 | 0.018781 | 55.44 |
| 300131 | 2016 | 0.14  | 0.05 | 1.011601 | 1.0233364 | 22.00885 | 0.107811 | 26.55 |
| 300167 | 2016 | 0.119 | 0.05 | 1.011601 | 1.0233364 | 20.89902 | 0.037586 | 39.99 |
| 60     | 2016 | -0.51 | 0.05 | 1.011601 | 1.0233364 | 23.55466 | 0.069638 | 29.58 |
| 300044 | 2016 | 0.416 | 0.05 | 1.011601 | 1.0233364 | 21.45423 | 0.113346 | 18.53 |
| 2577   | 2016 | -0.39 | 0.05 | 1.011601 | 1.0233364 | 20.99223 | 0.000995 | 62.29 |
| 300227 | 2016 | 0.068 | 0.05 | 1.011601 | 1.0233364 | 20.35189 | 0.034836 | 19.62 |
| 300124 | 2016 | 0.278 | 0.05 | 1.011601 | 1.0233364 | 22.3219  | 0.196731 | 19.26 |
| 300085 | 2016 | 1.017 | 0.05 | 1.011601 | 1.0233364 | 21.12303 | 0.09432  | 19.61 |
| 2528   | 2016 | 0.781 | 0.05 | 1.011601 | 1.0233364 | 22.12956 | -0.14593 | 30.73 |
| 45     | 2016 | -0.03 | 0.05 | 1.011601 | 1.0233364 | 21.72395 | -0.02537 | 46.21 |
| 300012 | 2016 | 0.294 | 0.05 | 1.011601 | 1.0233364 | 21.86193 | 0.04517  | 13.81 |
| 2314   | 2016 | -0.91 | 0.05 | 1.011601 | 1.0233364 | 23.41221 | 0.092596 | 50.03 |
| 2243   | 2016 | -0.1  | 0.05 | 1.011601 | 1.0233364 | 21.31653 | 0.022429 | 51.52 |
| 999    | 2016 | -0.81 | 0.05 | 1.011601 | 1.0233364 | 22.96737 | 0.138483 | 63.6  |
| 2161   | 2016 | 1.565 | 0.05 | 1.011601 | 1.0233364 | 21.48089 | 0.02323  | 24.39 |
| 2429   | 2016 | -0.57 | 0.05 | 1.011601 | 1.0233364 | 23.23253 | 0.045673 | 54.5  |
| 2047   | 2016 | -0.57 | 0.05 | 1.011601 | 1.0233364 | 22.89373 | 0.141863 | 21.51 |
| 2482   | 2016 | 0.025 | 0.05 | 1.011601 | 1.0233364 | 23.48614 | 0.063532 | 38.18 |
| 2340   | 2016 | 0.014 | 0.05 | 1.011601 | 1.0233364 | 23.6715  | 0.041603 | 12.54 |
| 2130   | 2016 | -0.28 | 0.05 | 1.011601 | 1.0233364 | 22.4023  | 0.040041 | 24.64 |
| 300077 | 2016 | 2.238 | 0.05 | 1.011601 | 1.0233364 | 21.91542 | 0.03416  | 7.84  |

|        |      |       |      |          |           |          |          |       |
|--------|------|-------|------|----------|-----------|----------|----------|-------|
| 2137   | 2016 | -0.76 | 0.05 | 1.011601 | 1.0233364 | 21.36708 | 0.093442 | 38.18 |
| 39     | 2016 | 0.203 | 0.05 | 1.011601 | 1.0233364 | 24.14203 | 0.018781 | 55.44 |
| 2724   | 2016 | 0.781 | 0.05 | 1.011601 | 1.0233364 | 21.35706 | 0.068194 | 70.42 |
| 2256   | 2016 | 0.585 | 0.05 | 1.011601 | 1.0233364 | 21.93208 | 0.052194 | 26.23 |
| 2215   | 2016 | -0.22 | 0.05 | 1.011601 | 1.0233364 | 21.87017 | -0.15868 | 27.56 |
| 63     | 2016 | 1.52  | 0.05 | 1.011601 | 1.0233364 | 25.67656 | -0.19898 | 30.35 |
| 39     | 2016 | -0.27 | 0.05 | 1.011601 | 1.0233364 | 25.54849 | 0.018781 | 55.44 |
| 39     | 2016 | -0.4  | 0.05 | 1.011601 | 1.0233364 | 25.54849 | 0.018781 | 55.44 |
| 2340   | 2016 | -0.19 | 0.05 | 1.011601 | 1.0233364 | 23.6715  | 0.041603 | 12.54 |
| 300389 | 2016 | 0.093 | 0.05 | 1.011601 | 1.0233364 | 21.22259 | 0.156125 | 25.51 |
| 300311 | 2016 | 1.764 | 0.05 | 1.011601 | 1.0233364 | 21.30365 | 0.098449 | 39.46 |
| 2138   | 2016 | 0.338 | 0.05 | 1.011601 | 1.0233364 | 22.11984 | 0.134333 | 11.74 |
| 2191   | 2016 | -0.54 | 0.05 | 1.011601 | 1.0233364 | 22.62249 | 0.132569 | 32.73 |
| 600380 | 2016 | 0.771 | 0.05 | 1.011601 | 1.0233364 | 23.50033 | 0.104385 | 46.78 |
| 1979   | 2016 | -0.99 | 0.05 | 1.011601 | 1.0233364 | 25.74206 | 0.156592 | 66.1  |
| 2008   | 2016 | -0.06 | 0.05 | 1.011601 | 1.0233364 | 23.06213 | 0.135965 | 17.64 |
| 39     | 2016 | -0.84 | 0.05 | 1.011601 | 1.0233364 | 25.54849 | 0.018781 | 55.44 |
| 2121   | 2016 | 1.334 | 0.05 | 1.011601 | 1.0233364 | 23.22664 | 0.099215 | 40.95 |
| 600525 | 2016 | 0.106 | 0.05 | 1.011601 | 1.0233364 | 23.47182 | 0.094461 | 7.84  |
| 300193 | 2016 | -0.24 | 0.05 | 1.011601 | 1.0233364 | 21.63289 | 0.048537 | 19.66 |
| 1979   | 2016 | -0.99 | 0.05 | 1.011601 | 1.0233364 | 25.74206 | 0.156592 | 66.1  |
| 2313   | 2016 | -0.42 | 0.05 | 1.011601 | 1.0233364 | 22.0844  | 0.040307 | 19.69 |
| 2106   | 2016 | 0.334 | 0.05 | 1.011601 | 1.0233364 | 22.25953 | 0.059913 | 20.84 |
| 300130 | 2016 | 0.654 | 0.05 | 1.011601 | 1.0233364 | 21.75173 | 0.097748 | 32.55 |
| 2334   | 2016 | 0.827 | 0.05 | 1.011601 | 1.0233364 | 21.67227 | 0.038089 | 17.73 |
| 300197 | 2016 | -0.11 | 0.05 | 1.011601 | 1.0233364 | 23.16034 | 0.100676 | 40.74 |
| 26     | 2016 | -0.72 | 0.05 | 1.011601 | 1.0233364 | 22.11078 | 0.046475 | 37.15 |
| 2215   | 2016 | -0.67 | 0.05 | 1.011601 | 1.0233364 | 21.87017 | -0.15868 | 27.56 |
| 999    | 2016 | -0.81 | 0.05 | 1.011601 | 1.0233364 | 23.32978 | 0.138483 | 63.6  |
| 2139   | 2016 | -0.39 | 0.05 | 1.011601 | 1.0233364 | 21.72216 | 0.083375 | 19.61 |
| 300112 | 2016 | 0.093 | 0.05 | 1.011601 | 1.0233364 | 20.66041 | 0.03708  | 21.72 |
| 60     | 2016 | -0.51 | 0.05 | 1.011601 | 1.0233364 | 23.55466 | 0.069638 | 29.58 |
| 2137   | 2016 | -0.76 | 0.05 | 1.011601 | 1.0233364 | 21.36708 | 0.093442 | 38.18 |
| 300199 | 2016 | 0.441 | 0.05 | 1.011601 | 1.0233364 | 22.21774 | 0.080987 | 25.82 |
| 39     | 2016 | 0.203 | 0.05 | 1.011601 | 1.0233364 | 25.54849 | 0.018781 | 55.44 |
| 39     | 2016 | -0.84 | 0.05 | 1.011601 | 1.0233364 | 25.54849 | 0.018781 | 55.44 |
| 27     | 2016 | -0.92 | 0.05 | 1.011601 | 1.0233364 | 24.83188 | 0.056656 | 47.82 |
| 2191   | 2016 | 0.036 | 0.05 | 1.011601 | 1.0233364 | 22.62249 | 0.132569 | 32.73 |
| 2047   | 2016 | 0.752 | 0.05 | 1.011601 | 1.0233364 | 22.89373 | 0.141863 | 21.51 |
| 300241 | 2016 | -0.32 | 0.05 | 1.011601 | 1.0233364 | 21.36223 | 0.048855 | 26.52 |
| 300400 | 2016 | -0.13 | 0.05 | 1.011601 | 1.0233364 | 20.16555 | 0.121419 | 34.05 |
| 2402   | 2016 | 0.036 | 0.05 | 1.011601 | 1.0233364 | 21.12675 | 0.112704 | 17.88 |
| 600525 | 2016 | -0.14 | 0.05 | 1.011601 | 1.0233364 | 23.47182 | 0.094461 | 7.84  |
| 300206 | 2016 | 1.328 | 0.05 | 1.011601 | 1.0233364 | 21.10676 | 0.01588  | 20.86 |
| 2518   | 2016 | -0.38 | 0.05 | 1.011601 | 1.0233364 | 21.76063 | 0.15033  | 60.1  |
| 300085 | 2016 | 1.458 | 0.05 | 1.011601 | 1.0233364 | 21.12303 | 0.09432  | 19.61 |
| 66     | 2016 | -0.13 | 0.05 | 1.011601 | 1.0233364 | 24.43344 | 0.022581 | 53.92 |
| 70     | 2016 | -0.12 | 0.05 | 1.011601 | 1.0233364 | 22.34572 | 0.032292 | 39.18 |
| 300207 | 2016 | -0.1  | 0.05 | 1.011601 | 1.0233364 | 22.84299 | 0.189625 | 33.79 |
| 90     | 2016 | -0.59 | 0.05 | 1.011601 | 1.0233364 | 23.68289 | 0.060213 | 23.47 |
| 2735   | 2016 | -0.82 | 0.05 | 1.011601 | 1.0233364 | 20.23565 | 0.07888  | 54.23 |
| 600446 | 2016 | 1.617 | 0.05 | 1.011601 | 1.0233364 | 21.87843 | 0.163568 | 10.7  |
| 300269 | 2016 | -0.23 | 0.05 | 1.011601 | 1.0233364 | 22.7288  | 0.07484  | 18.8  |
| 300037 | 2016 | 0.949 | 0.05 | 1.011601 | 1.0233364 | 21.75186 | 0.119079 | 15.51 |

|        |      |       |      |          |           |          |          |       |
|--------|------|-------|------|----------|-----------|----------|----------|-------|
| 2436   | 2016 | 0.299 | 0.05 | 1.011601 | 1.0233364 | 22.17036 | 0.09118  | 17.77 |
| 12     | 2016 | 0.096 | 0.05 | 1.011601 | 1.0233364 | 23.56508 | 0.098931 | 15.45 |
| 2191   | 2016 | -0.12 | 0.05 | 1.011601 | 1.0233364 | 22.38025 | 0.132569 | 32.73 |
| 300112 | 2016 | 0.093 | 0.05 | 1.011601 | 1.0233364 | 20.66041 | 0.03708  | 21.72 |
| 300227 | 2016 | -0.59 | 0.05 | 1.011601 | 1.0233364 | 20.35189 | 0.034836 | 19.62 |
| 49     | 2016 | -0.31 | 0.05 | 1.011601 | 1.0233364 | 22.36145 | 0.233108 | 45.23 |
| 45     | 2016 | -0.03 | 0.05 | 1.011601 | 1.0233364 | 22.13902 | 0.012258 | 46.21 |
| 300264 | 2016 | 1.328 | 0.05 | 1.011601 | 1.0233364 | 20.61357 | 0.010715 | 29.49 |
| 300269 | 2016 | -0.07 | 0.05 | 1.011601 | 1.0233364 | 22.7288  | 0.07484  | 18.8  |
| 300124 | 2016 | 0.304 | 0.05 | 1.011601 | 1.0233364 | 22.3219  | 0.196731 | 19.26 |
| 70     | 2016 | -0.05 | 0.05 | 1.011601 | 1.0233364 | 22.34572 | 0.032292 | 39.18 |
| 16     | 2016 | -0.21 | 0.05 | 1.011601 | 1.0233364 | 23.57068 | 0.027776 | 21.75 |
| 300136 | 2016 | 0.172 | 0.05 | 1.011601 | 1.02E+00  | 21.7123  | 0.268381 | 23.88 |
| 28     | 2016 | 0.507 | 0.05 | 1.011601 | 1.02E+00  | 23.78257 | 0.081732 | 51    |
| 2227   | 2016 | 0.311 | 0.05 | 1.011601 | 1.02E+00  | 20.72384 | 0.011367 | 57.57 |
| 9      | 2016 | 0.595 | 0.05 | 1.011601 | 1.02E+00  | 23.79702 | -0.02796 | 11.91 |
| 300162 | 2016 | -0.37 | 0.05 | 1.011601 | 1.02E+00  | 21.12846 | 0.026709 | 22.53 |
| 2138   | 2016 | 0.338 | 0.05 | 1.011601 | 1.0233364 | 22.11984 | 0.134333 | 11.74 |
| 300457 | 2016 | -0.1  | 0.05 | 1.011601 | 1.0233364 | 21.30455 | 0.199897 | 45.27 |
| 2340   | 2016 | -0.68 | 0.05 | 1.011601 | 1.0233364 | 23.29606 | 0.041603 | 12.54 |
| 300232 | 2016 | -0.2  | 0.05 | 1.011601 | 1.0233364 | 21.68096 | 0.109479 | 43.28 |
| 300012 | 2016 | 0.515 | 0.05 | 1.011601 | 1.0233364 | 21.86193 | 0.04517  | 13.81 |
| 300115 | 2016 | 0.494 | 0.05 | 1.011601 | 1.0233364 | 22.82527 | 0.167006 | 47.19 |
| 300012 | 2016 | 0.354 | 0.05 | 1.011601 | 1.0233364 | 21.86193 | 0.04517  | 13.81 |
| 300227 | 2016 | 0.227 | 0.05 | 1.011601 | 1.0233364 | 20.35189 | 0.034836 | 19.62 |
| 600525 | 2016 | 0.603 | 0.05 | 1.011601 | 1.0233364 | 23.47182 | 0.094461 | 7.84  |
| 16     | 2016 | -0.84 | 0.05 | 1.011601 | 1.0233364 | 23.57068 | 0.027776 | 21.75 |
| 2482   | 2016 | 0.192 | 0.05 | 1.011601 | 1.0233364 | 23.48614 | 0.063532 | 38.18 |
| 300115 | 2016 | 0.126 | 0.05 | 1.011601 | 1.0233364 | 22.82527 | 0.167006 | 47.19 |
| 2735   | 2016 | 0.06  | 0.05 | 1.011601 | 1.0233364 | 20.23565 | 0.07888  | 54.23 |
| 2352   | 2016 | -0.09 | 0.05 | 1.011601 | 1.0233364 | 24.51052 | 0.202406 | 42.9  |
| 2672   | 2016 | -0.64 | 0.05 | 1.011601 | 1.0233364 | 22.82608 | 0.149297 | 22.56 |
| 2594   | 2016 | -0.35 | 0.05 | 1.011601 | 1.0233364 | 25.70049 | 0.0989   | 25.24 |
| 2356   | 2016 | -0.79 | 0.05 | 1.011601 | 1.0233364 | 22.28051 | 0.088833 | 49.28 |
| 28     | 2016 | 0.507 | 0.05 | 1.011601 | 1.0233364 | 23.78257 | 0.081732 | 51    |
| 2161   | 2016 | 0.902 | 0.05 | 1.011601 | 1.0233364 | 21.48089 | 0.02323  | 24.39 |
| 300193 | 2016 | -0.13 | 0.05 | 1.011601 | 1.0233364 | 21.63289 | 0.048537 | 19.66 |
| 603118 | 2016 | 0.226 | 0.05 | 1.011601 | 1.0233364 | 22.65879 | 0.079281 | 24.95 |
| 300134 | 2016 | 0.001 | 0.05 | 1.011601 | 1.0233364 | 22.7206  | 0.021913 | 43.39 |
| 600446 | 2016 | 1.783 | 0.05 | 1.011601 | 1.0233364 | 21.87843 | 0.163568 | 10.7  |
| 600380 | 2016 | 0.771 | 0.05 | 1.011601 | 1.0233364 | 23.50033 | 0.104385 | 46.78 |
| 2105   | 2016 | -0.58 | 0.05 | 1.011601 | 1.0233364 | 20.82409 | 0.027483 | 41.93 |
| 2139   | 2016 | 0.101 | 0.05 | 1.011601 | 1.0233364 | 21.72216 | 0.083375 | 19.61 |
| 300130 | 2016 | 1.396 | 0.05 | 1.011601 | 1.0233364 | 21.75173 | 0.097748 | 32.55 |
| 300136 | 2016 | 0.022 | 0.05 | 1.011601 | 1.0233364 | 21.87485 | 0.268381 | 23.88 |
| 2340   | 2016 | 0.417 | 0.05 | 1.011601 | 1.0233364 | 23.6715  | 0.041603 | 12.54 |
| 50     | 2016 | 0.512 | 0.05 | 1.011601 | 1.0233364 | 23.79963 | 0.012787 | 20.81 |
| 300134 | 2016 | -0.18 | 0.05 | 1.011601 | 1.0233364 | 22.77646 | 0.021913 | 43.39 |
| 300301 | 2016 | -0.2  | 0.05 | 1.011601 | 1.0233364 | 22.05661 | -0.00327 | 21.02 |
| 2518   | 2016 | -0.38 | 0.05 | 1.011601 | 1.0233364 | 21.65527 | 0.15033  | 60.1  |
| 300301 | 2016 | -0.2  | 0.05 | 1.011601 | 1.0233364 | 22.05661 | -0.00327 | 21.02 |
| 300301 | 2016 | -0.2  | 0.05 | 1.011601 | 1.0233364 | 22.05661 | -0.00327 | 21.02 |
| 300269 | 2016 | -0.31 | 0.05 | 1.011601 | 1.0233364 | 22.7288  | 0.07484  | 18.8  |
| 300134 | 2016 | 0.842 | 0.05 | 1.011601 | 1.0233364 | 22.77646 | 0.021913 | 43.39 |

|        |      |       |      |          |           |          |          |       |
|--------|------|-------|------|----------|-----------|----------|----------|-------|
| 16     | 2016 | -0.58 | 0.05 | 1.011601 | 1.0233364 | 23.57068 | 0.027776 | 21.75 |
| 603118 | 2016 | -0.14 | 0.05 | 1.011601 | 1.0233364 | 22.65879 | 0.079281 | 24.95 |
| 2583   | 2016 | 1.622 | 0.05 | 1.011601 | 1.0233364 | 22.64138 | 0.084508 | 51.66 |
| 300400 | 2016 | -0.13 | 0.05 | 1.011601 | 1.0233364 | 20.16555 | 0.121419 | 34.05 |
| 2672   | 2016 | -0.2  | 0.05 | 1.011601 | 1.0233364 | 22.82608 | 0.149297 | 22.56 |
| 2475   | 2016 | 0.079 | 0.05 | 1.011601 | 1.0233364 | 23.76563 | 0.097451 | 50.06 |
| 2294   | 2016 | 1.014 | 0.05 | 1.011601 | 1.0233364 | 22.60031 | 0.254583 | 67.73 |
| 60     | 2016 | -0.37 | 0.05 | 1.011601 | 1.0233364 | 23.55466 | 0.069638 | 29.58 |
| 2008   | 2016 | 0.422 | 0.05 | 1.011601 | 1.0233364 | 23.06213 | 0.135965 | 17.64 |
| 66     | 2016 | 0.066 | 0.05 | 1.011601 | 1.0233364 | 24.43344 | 0.022581 | 53.92 |
| 2733   | 2016 | -0.24 | 0.05 | 1.011601 | 1.0233364 | 21.66658 | 0.054154 | 36.26 |
| 600525 | 2016 | -0.14 | 0.05 | 1.011601 | 1.0233364 | 23.47182 | 0.094461 | 7.84  |
| 2294   | 2016 | 0.828 | 0.05 | 1.011601 | 1.0233364 | 22.60031 | 0.254583 | 67.73 |
| 2227   | 2016 | 0.311 | 0.05 | 1.011601 | 1.0233364 | 20.72384 | 0.011367 | 57.57 |
| 27     | 2016 | -0.26 | 0.05 | 1.011601 | 1.0233364 | 24.83188 | 0.056656 | 47.82 |
| 2724   | 2016 | 0.7   | 0.05 | 1.011601 | 1.0233364 | 21.35706 | 0.068194 | 70.42 |
| 300252 | 2016 | -0.57 | 0.05 | 1.011601 | 1.0233364 | 22.12533 | 0.096123 | 34.12 |
| 300162 | 2016 | 0.008 | 0.05 | 1.011601 | 1.0233364 | 21.12846 | 0.026709 | 22.53 |
| 300317 | 2016 | -0.15 | 0.05 | 1.011601 | 1.0233364 | 22.9325  | 0.074278 | 26.18 |
| 12     | 2016 | -0.26 | 0.05 | 1.011601 | 1.0233364 | 23.56508 | 0.098931 | 15.45 |
| 55     | 2016 | 0.097 | 0.05 | 1.011601 | 1.0233364 | 22.63828 | 0.187623 | 8.72  |
| 300317 | 2016 | -0.09 | 0.05 | 1.011601 | 1.0233364 | 22.9325  | 0.074278 | 26.18 |
| 39     | 2016 | 0.203 | 0.05 | 1.011601 | 1.0233364 | 25.54849 | 0.018781 | 55.44 |
| 300319 | 2016 | -0.04 | 0.05 | 1.011601 | 1.0233364 | 21.86227 | 0.068369 | 27.44 |
| 2341   | 2016 | -0.63 | 0.05 | 1.011601 | 1.0233364 | 22.56267 | 0.014917 | 27.04 |
| 2191   | 2016 | -0.09 | 0.05 | 1.011601 | 1.0233364 | 22.62249 | 0.132569 | 32.73 |
| 2475   | 2016 | 0.079 | 0.05 | 1.011601 | 1.0233364 | 23.76563 | 0.097451 | 50.06 |
| 2609   | 2016 | 0.865 | 0.05 | 1.011601 | 1.0233364 | 21.62169 | 0.087596 | 35.42 |
| 26     | 2016 | -0.73 | 0.05 | 1.011601 | 1.0233364 | 22.11078 | 0.063061 | 37.15 |
| 2594   | 2016 | -0.02 | 0.05 | 1.011601 | 1.0233364 | 25.70049 | 0.0989   | 25.24 |
| 600525 | 2016 | 0.024 | 0.05 | 1.011601 | 1.0233364 | 23.47182 | 0.094461 | 7.84  |
| 300333 | 2016 | 2.598 | 0.05 | 1.011601 | 1.0233364 | 20.57258 | 0.039137 | 24.78 |
| 603808 | 2016 | -0.01 | 0.05 | 1.011601 | 1.0233364 | 21.66697 | 0.122897 | 61.99 |
| 39     | 2016 | 0.203 | 0.05 | 1.011601 | 1.0233364 | 25.54849 | 0.018781 | 55.44 |
| 2782   | 2016 | -0.79 | 0.05 | 1.011601 | 1.0233364 | 20.75777 | 0.07204  | 35.56 |
| 600525 | 2016 | 0.656 | 0.05 | 1.011601 | 1.0233364 | 23.47182 | 0.094461 | 7.84  |
| 2303   | 2016 | -0.36 | 0.05 | 1.011601 | 1.0233364 | 22.29515 | 0.054002 | 42.44 |
| 2121   | 2016 | 0.648 | 0.05 | 1.011601 | 1.0233364 | 23.22664 | 0.099215 | 40.95 |
| 2766   | 2016 | -0.12 | 0.05 | 1.011601 | 1.0233364 | 21.30138 | -0.0713  | 48.49 |
| 2106   | 2016 | 0.27  | 0.05 | 1.011601 | 1.0233364 | 22.0059  | 0.059913 | 20.84 |
| 49     | 2016 | -0.18 | 0.05 | 1.011601 | 1.0233364 | 22.36145 | 0.233108 | 45.23 |
| 300232 | 2016 | -0.36 | 0.05 | 1.011601 | 1.0233364 | 21.68096 | 0.109479 | 43.28 |
| 16     | 2016 | -0.58 | 0.05 | 1.011601 | 1.0233364 | 23.57068 | 0.027776 | 21.75 |
| 2475   | 2016 | -0.53 | 0.05 | 1.011601 | 1.0233364 | 23.76563 | 0.097451 | 50.06 |
| 2243   | 2016 | -0.1  | 0.05 | 1.011601 | 1.0233364 | 21.31653 | 0.022429 | 51.52 |
| 2191   | 2016 | 0.126 | 0.05 | 1.011601 | 1.0233364 | 22.62249 | 0.132569 | 32.73 |
| 555    | 2016 | 1.101 | 0.05 | 1.011601 | 1.0233364 | 22.97437 | 0.054547 | 40.43 |
| 300134 | 2016 | -0.48 | 0.05 | 1.011601 | 1.0233364 | 22.77646 | 0.021913 | 43.39 |
| 300131 | 2016 | 0.14  | 0.05 | 1.011601 | 1.0233364 | 21.49331 | 0.107811 | 26.55 |
| 2775   | 2016 | -0.28 | 0.05 | 1.011601 | 1.0233364 | 21.50607 | 0.119414 | 20.65 |
| 21     | 2016 | -0.52 | 0.05 | 1.011601 | 1.0233364 | 23.18434 | 0.042237 | 44.51 |
| 16     | 2016 | -0.31 | 0.05 | 1.011601 | 1.0233364 | 23.57068 | 0.027776 | 21.75 |
| 300151 | 2016 | -0.52 | 0.05 | 1.011601 | 1.0233364 | 20.73055 | 0.039047 | 45.86 |
| 2775   | 2016 | -0.33 | 0.05 | 1.011601 | 1.0233364 | 21.49986 | 0.119414 | 20.65 |

|        |      |       |      |          |           |          |          |       |
|--------|------|-------|------|----------|-----------|----------|----------|-------|
| 78     | 2016 | 0.39  | 0.05 | 1.011601 | 1.0233364 | 23.53636 | 0.084867 | 45.93 |
| 600525 | 2016 | -0.14 | 0.05 | 1.011601 | 1.0233364 | 23.47182 | 0.094461 | 7.84  |
| 2475   | 2016 | 0.079 | 0.05 | 1.011601 | 1.0233364 | 23.18196 | 0.097451 | 50.06 |
| 32     | 2016 | 0.329 | 0.05 | 1.011601 | 1.0233364 | 21.39387 | 0.029528 | 49.18 |
| 2356   | 2016 | -0.79 | 0.05 | 1.011601 | 1.0233364 | 22.28051 | 0.088833 | 49.28 |
| 2243   | 2016 | -0.42 | 0.05 | 1.011601 | 1.0233364 | 21.22881 | 0.022429 | 51.52 |
| 70     | 2016 | -0.06 | 0.05 | 1.011601 | 1.0233364 | 22.34572 | 0.032292 | 39.18 |
| 2421   | 2016 | 0.488 | 0.05 | 1.011601 | 1.0233364 | 22.29824 | 0.099328 | 20.77 |
| 1979   | 2016 | -0.73 | 0.05 | 1.011601 | 1.0233364 | 25.3411  | 0.156592 | 66.1  |
| 300115 | 2016 | 0.337 | 0.05 | 1.011601 | 1.0233364 | 22.82527 | 0.167006 | 47.19 |
| 2197   | 2016 | 0.273 | 0.05 | 1.011601 | 1.0233364 | 22.28122 | 0.018141 | 20.14 |
| 300134 | 2016 | -0.03 | 0.05 | 1.011601 | 1.0233364 | 22.77646 | 0.021913 | 43.39 |
| 300301 | 2016 | -0.18 | 0.05 | 1.011601 | 1.0233364 | 22.05661 | -0.00327 | 21.02 |
| 300389 | 2016 | 0.121 | 0.05 | 1.011601 | 1.0233364 | 21.22259 | 0.156125 | 25.51 |
| 300389 | 2016 | 0.15  | 0.05 | 1.011601 | 1.0233364 | 21.3043  | 0.156125 | 25.51 |
| 600380 | 2016 | 0.33  | 0.05 | 1.011601 | 1.0233364 | 23.50033 | 0.104385 | 46.78 |
| 2138   | 2016 | -0.17 | 0.05 | 1.011601 | 1.0233364 | 22.11984 | 0.134333 | 11.74 |
| 2105   | 2016 | -0.58 | 0.05 | 1.011601 | 1.0233364 | 21.05476 | 0.027483 | 41.93 |
| 21     | 2016 | -0.34 | 0.05 | 1.011601 | 1.0233364 | 23.18434 | 0.042237 | 44.51 |
| 300197 | 2016 | -0.1  | 0.05 | 1.011601 | 1.0233364 | 23.16034 | 0.100676 | 40.74 |
| 2786   | 2016 | -0.24 | 0.05 | 1.011601 | 1.0233364 | 21.86134 | 0.097421 | 35.74 |
| 9      | 2016 | -0.73 | 0.05 | 1.011601 | 1.0233364 | 23.79702 | -0.02796 | 11.91 |
| 2008   | 2016 | 0.441 | 0.05 | 1.011601 | 1.0233364 | 23.06213 | 0.135965 | 17.64 |
| 300012 | 2016 | 0.354 | 0.05 | 1.011601 | 1.0233364 | 21.86193 | 0.04517  | 13.81 |
| 999    | 2016 | -0.63 | 0.05 | 1.011601 | 1.0233364 | 23.32978 | 0.138483 | 63.6  |
| 2130   | 2016 | -0.28 | 0.05 | 1.011601 | 1.0233364 | 22.4023  | 0.040041 | 24.64 |
| 300400 | 2016 | -0.13 | 0.05 | 1.011601 | 1.0233364 | 20.16555 | 0.121419 | 34.05 |
| 2163   | 2016 | 0.001 | 0.05 | 1.011601 | 1.02E+00  | 22.63495 | -0.06801 | 13.74 |
| 16     | 2016 | -0.14 | 0.05 | 1.011601 | 1.02E+00  | 23.57068 | -0.13874 | 21.75 |
| 39     | 2016 | -0.18 | 0.05 | 1.011601 | 1.02E+00  | 25.54849 | 0.018781 | 55.44 |
| 300303 | 2016 | 0.476 | 0.05 | 1.011601 | 1.02E+00  | 21.78851 | 0.083451 | 22.94 |
| 600525 | 2016 | -0.14 | 0.05 | 1.011601 | 1.02E+00  | 23.47182 | 0.094461 | 7.84  |
| 2620   | 2016 | -0.25 | 0.05 | 1.011601 | 1.02E+00  | 22.03986 | 0.042149 | 21.05 |
| 2681   | 2016 | -0.05 | 0.05 | 1.011601 | 1.02E+00  | 22.14544 | 0.136136 | 44.54 |
| 2577   | 2016 | -0.23 | 0.05 | 1.011601 | 1.02E+00  | 20.99223 | 0.000995 | 62.29 |
| 2052   | 2016 | 0.767 | 0.05 | 1.011601 | 1.02E+00  | 21.36908 | -0.4336  | 16.5  |
| 2782   | 2016 | -0.79 | 0.05 | 1.011601 | 1.0233364 | 20.75777 | 0.07204  | 35.56 |
| 300301 | 2016 | -0.33 | 0.05 | 1.011601 | 1.0233364 | 21.81291 | -0.00327 | 21.02 |
| 2436   | 2016 | 0.413 | 0.05 | 1.011601 | 1.0233364 | 22.17036 | 0.09118  | 17.77 |
| 2518   | 2016 | -0.38 | 0.05 | 1.011601 | 1.0233364 | 21.76063 | 0.15033  | 60.1  |
| 16     | 2016 | -0.45 | 0.05 | 1.011601 | 1.0233364 | 23.57068 | 0.027776 | 21.75 |
| 300154 | 2016 | 0.107 | 0.05 | 1.011601 | 1.0233364 | 21.30185 | 0.044678 | 39.52 |
| 2137   | 2016 | -0.68 | 0.05 | 1.011601 | 1.0233364 | 21.36708 | 0.093442 | 38.18 |
| 300252 | 2016 | -0.13 | 0.05 | 1.011601 | 1.0233364 | 22.12533 | 0.096123 | 34.12 |
| 300206 | 2016 | 1.962 | 0.05 | 1.011601 | 1.0233364 | 21.09275 | 0.01588  | 20.86 |
| 600525 | 2016 | 0.509 | 0.05 | 1.011601 | 1.0233364 | 23.47182 | 0.094461 | 7.84  |
| 19     | 2016 | 0.539 | 0.05 | 1.011601 | 1.0233364 | 20.88755 | 0.043202 | 19.09 |
| 2436   | 2016 | 0.3   | 0.05 | 1.011601 | 1.0233364 | 22.17036 | 0.09118  | 17.77 |
| 2528   | 2016 | 0.772 | 0.05 | 1.011601 | 1.0233364 | 22.12956 | -0.14593 | 30.73 |
| 39     | 2016 | -0.31 | 0.05 | 1.011601 | 1.0233364 | 25.54849 | 0.018781 | 55.44 |
| 300235 | 2016 | 2.296 | 0.05 | 1.011601 | 1.0233364 | 20.10336 | 0.050475 | 22.65 |
| 2429   | 2016 | 0.185 | 0.05 | 1.011601 | 1.0233364 | 23.23253 | 0.045673 | 54.5  |
| 2475   | 2016 | -0.4  | 0.05 | 1.011601 | 1.0233364 | 23.76563 | 0.097451 | 50.06 |
| 2751   | 2016 | 0.368 | 0.05 | 1.011601 | 1.0233364 | 20.96462 | -0.03011 | 28.41 |



|        |      |       |      |          |           |          |          |       |
|--------|------|-------|------|----------|-----------|----------|----------|-------|
| 300317 | 2016 | -0.81 | 0.05 | 1.011601 | 1.0233364 | 22.9325  | 0.074278 | 26.18 |
| 300134 | 2016 | -0.48 | 0.05 | 1.011601 | 1.0233364 | 22.77646 | 0.021913 | 43.39 |
| 2163   | 2016 | -0.41 | 0.05 | 1.011601 | 1.0233364 | 22.63495 | -0.06801 | 13.74 |
| 300207 | 2016 | -0.1  | 0.05 | 1.011601 | 1.0233364 | 22.84299 | 0.189625 | 33.79 |
| 2168   | 2016 | -0.33 | 0.05 | 1.011601 | 1.0233364 | 21.43734 | 0.056051 | 9.96  |
| 2340   | 2016 | -0.12 | 0.05 | 1.011601 | 1.0233364 | 23.6715  | 0.041603 | 12.54 |
| 300154 | 2016 | 0.284 | 0.05 | 1.011601 | 1.0233364 | 21.30185 | 0.044678 | 39.52 |
| 300269 | 2016 | 0.012 | 0.05 | 1.011601 | 1.0233364 | 22.7288  | 0.07484  | 18.8  |
| 2303   | 2016 | -0.21 | 0.05 | 1.011601 | 1.0233364 | 22.29515 | 0.054002 | 42.44 |
| 2654   | 2016 | -0.32 | 0.05 | 1.011601 | 1.0233364 | 21.91507 | 0.066087 | 17.25 |
| 2313   | 2016 | 0.152 | 0.05 | 1.011601 | 1.0233364 | 22.0844  | 0.040307 | 19.69 |
| 2137   | 2016 | -0.68 | 0.05 | 1.011601 | 1.0233364 | 21.36708 | 0.093442 | 38.18 |
| 2672   | 2016 | -0.64 | 0.05 | 1.011601 | 1.0233364 | 22.82608 | 0.149297 | 22.56 |
| 300044 | 2016 | -0.07 | 0.05 | 1.011601 | 1.0233364 | 21.45423 | 0.113346 | 18.53 |
| 300151 | 2016 | -0.47 | 0.05 | 1.011601 | 1.0233364 | 20.73055 | 0.039047 | 45.86 |
| 300252 | 2016 | -0.4  | 0.05 | 1.011601 | 1.0233364 | 22.12533 | 0.096123 | 34.12 |
| 2340   | 2016 | -0.68 | 0.05 | 1.011601 | 1.0233364 | 23.6715  | 0.041603 | 12.54 |
| 300457 | 2016 | 0.233 | 0.05 | 1.011601 | 1.0233364 | 21.30455 | 0.199897 | 45.27 |
| 2256   | 2016 | 0.732 | 0.05 | 1.011601 | 1.0233364 | 21.70602 | 0.052194 | 26.23 |
| 2130   | 2016 | -0.19 | 0.05 | 1.011601 | 1.0233364 | 22.4023  | 0.040041 | 24.64 |
| 2681   | 2016 | -0.19 | 0.05 | 1.011601 | 1.0233364 | 21.98385 | 0.136136 | 44.54 |
| 555    | 2016 | 1.33  | 0.05 | 1.011601 | 1.0233364 | 22.97437 | 0.054547 | 40.43 |
| 9      | 2016 | -0.73 | 0.05 | 1.011601 | 1.0233364 | 23.79702 | -0.02796 | 11.91 |
| 2351   | 2016 | -0.32 | 0.05 | 1.011601 | 1.0233364 | 21.38674 | 0.046333 | 31.7  |
| 2672   | 2016 | -0.64 | 0.05 | 1.011601 | 1.0233364 | 22.82608 | 0.149297 | 22.56 |
| 600525 | 2016 | 0.49  | 0.05 | 1.011601 | 1.0233364 | 23.47182 | 0.094461 | 7.84  |
| 300134 | 2016 | 0.014 | 0.05 | 1.011601 | 1.0233364 | 22.77646 | 0.021913 | 43.39 |
| 60     | 2016 | -0.37 | 0.05 | 1.011601 | 1.0233364 | 23.55466 | 0.069638 | 29.58 |
| 300457 | 2016 | 0.022 | 0.05 | 1.011601 | 1.0233364 | 21.30455 | 0.199897 | 45.27 |
| 78     | 2016 | 0.39  | 0.05 | 1.011601 | 1.0233364 | 23.53636 | 0.084867 | 45.93 |
| 63     | 2016 | 1.585 | 0.05 | 1.011601 | 1.0233364 | 25.67656 | -0.19898 | 30.35 |
| 2475   | 2016 | -0.53 | 0.05 | 1.011601 | 1.0233364 | 23.76563 | 0.097451 | 50.06 |
| 2341   | 2016 | 0.42  | 0.05 | 1.011601 | 1.0233364 | 22.56267 | 0.014917 | 27.04 |
| 555    | 2016 | 0.005 | 0.05 | 1.011601 | 1.0233364 | 22.97437 | 0.054547 | 40.43 |
| 1979   | 2016 | -0.99 | 0.05 | 1.011601 | 1.0233364 | 25.74206 | 0.156592 | 66.1  |
| 300044 | 2016 | 0.26  | 0.05 | 1.011601 | 1.0233364 | 21.45423 | 0.113346 | 18.53 |
| 2130   | 2016 | -0.26 | 0.05 | 1.011601 | 1.0233364 | 22.4023  | 0.040041 | 24.64 |
| 2191   | 2016 | -0.25 | 0.05 | 1.011601 | 1.0233364 | 22.62249 | 0.132569 | 32.73 |
| 2170   | 2016 | 0.777 | 0.05 | 1.011601 | 1.0233364 | 22.15743 | 0.024766 | 27.07 |
| 300044 | 2016 | 0.523 | 0.05 | 1.011601 | 1.0233364 | 21.24819 | 0.113346 | 18.53 |
| 2482   | 2016 | 0.444 | 0.05 | 1.011601 | 1.0233364 | 23.48614 | 0.063532 | 38.18 |
| 32     | 2016 | -0.77 | 0.05 | 1.011601 | 1.0233364 | 21.39387 | 0.021402 | 49.18 |
| 300047 | 2016 | 1.299 | 0.05 | 1.011601 | 1.0233364 | 21.76592 | 0.066081 | 13.01 |
| 2352   | 2016 | -0.33 | 0.05 | 1.011601 | 1.0233364 | 24.51052 | 0.202406 | 42.9  |
| 2191   | 2016 | -0.09 | 0.05 | 1.011601 | 1.0233364 | 22.62249 | 0.132569 | 32.73 |
| 2672   | 2016 | -0.2  | 0.05 | 1.011601 | 1.0233364 | 22.82608 | 0.149297 | 22.56 |
| 2289   | 2016 | 0.414 | 0.05 | 1.011601 | 1.0233364 | 21.0502  | 0.044712 | 8.42  |
| 300241 | 2016 | -0.36 | 0.05 | 1.011601 | 1.0233364 | 21.36223 | 0.048855 | 26.52 |
| 300193 | 2016 | 0.006 | 0.05 | 1.011601 | 1.0233364 | 21.63289 | 0.048537 | 19.66 |
| 300162 | 2016 | -0.02 | 0.05 | 1.011601 | 1.0233364 | 21.12846 | 0.026709 | 22.53 |
| 300207 | 2016 | 0.063 | 0.05 | 1.011601 | 1.0233364 | 22.84299 | 0.189625 | 33.79 |
| 300333 | 2016 | 2.598 | 0.05 | 1.011601 | 1.0233364 | 20.61468 | 0.039137 | 24.78 |
| 2191   | 2016 | -0.08 | 0.05 | 1.011601 | 1.0233364 | 22.62249 | 0.132569 | 32.73 |
| 300457 | 2016 | -0.43 | 0.05 | 1.011601 | 1.0233364 | 21.30455 | 0.199897 | 45.27 |

|        |      |       |      |          |           |          |          |       |
|--------|------|-------|------|----------|-----------|----------|----------|-------|
| 300131 | 2016 | 0.14  | 0.05 | 1.011601 | 1.0233364 | 22.00885 | 0.107811 | 26.55 |
| 300130 | 2016 | 0.192 | 0.05 | 1.011601 | 1.0233364 | 21.75108 | 0.097748 | 32.55 |
| 300311 | 2016 | 1.863 | 0.05 | 1.011601 | 1.0233364 | 21.30365 | 0.098449 | 39.46 |
| 300112 | 2016 | 0.093 | 0.05 | 1.011601 | 1.0233364 | 20.66041 | 0.03708  | 21.72 |
| 66     | 2016 | 0.015 | 0.05 | 1.011601 | 1.0233364 | 24.43344 | 0.022581 | 53.92 |
| 2334   | 2016 | 1.725 | 0.05 | 1.011601 | 1.0233364 | 21.67227 | 0.038089 | 17.73 |
| 63     | 2016 | 0.899 | 0.05 | 1.011601 | 1.0233364 | 25.67656 | -0.19898 | 30.35 |
| 2548   | 2016 | 0.368 | 0.05 | 1.011601 | 1.0233364 | 21.9494  | 0.089097 | 40.95 |
| 300115 | 2016 | 0.356 | 0.05 | 1.011601 | 1.0233364 | 22.40904 | 0.167006 | 47.19 |
| 300311 | 2016 | 1.863 | 0.05 | 1.011601 | 1.0233364 | 21.26363 | 0.098449 | 39.46 |
| 39     | 2016 | 0.203 | 0.05 | 1.011601 | 1.0233364 | 25.54849 | 0.018781 | 55.44 |
| 2548   | 2016 | 0.47  | 0.05 | 1.011601 | 1.0233364 | 21.9494  | 0.089097 | 40.95 |
| 39     | 2016 | -0.3  | 0.05 | 1.011601 | 1.0233364 | 25.54849 | 0.018781 | 55.44 |
| 27     | 2016 | -0.67 | 0.05 | 1.011601 | 1.0233364 | 24.19158 | 0.056656 | 47.82 |
| 999    | 2016 | 0.518 | 0.05 | 1.011601 | 1.0233364 | 23.32978 | 0.138483 | 63.6  |
| 32     | 2016 | 0.558 | 0.05 | 1.011601 | 1.0233364 | 21.39387 | 0.029528 | 49.18 |
| 2047   | 2016 | -0.1  | 0.05 | 1.011601 | 1.0233364 | 22.89373 | 0.141863 | 21.51 |
| 2594   | 2016 | -0.51 | 0.05 | 1.011601 | 1.0233364 | 25.70049 | 0.0989   | 25.24 |
| 555    | 2016 | 1.33  | 0.05 | 1.011601 | 1.0233364 | 22.97437 | 0.054547 | 40.43 |
| 2197   | 2016 | 0.185 | 0.05 | 1.011601 | 1.0233364 | 22.19929 | 0.018141 | 20.14 |
| 2106   | 2016 | 0.126 | 0.05 | 1.011601 | 1.0233364 | 22.25953 | 0.059913 | 20.84 |
| 2313   | 2016 | 0.152 | 0.05 | 1.011601 | 1.0233364 | 22.0844  | 0.040307 | 19.69 |
| 2356   | 2016 | -0.09 | 0.05 | 1.011601 | 1.0233364 | 22.28051 | 0.088833 | 49.28 |
| 2334   | 2016 | 0.401 | 0.05 | 1.011601 | 1.0233364 | 21.67227 | 0.038089 | 17.73 |
| 300241 | 2016 | -0.25 | 0.05 | 1.011601 | 1.0233364 | 21.23327 | 0.048855 | 26.52 |
| 2301   | 2016 | -0.57 | 0.05 | 1.011601 | 1.0233364 | 21.84651 | 0.083717 | 49.41 |
| 39     | 2016 | -0.56 | 0.05 | 1.011601 | 1.0233364 | 25.54849 | 0.018781 | 55.44 |
| 2475   | 2016 | -0.53 | 0.05 | 1.011601 | 1.0233364 | 23.76563 | 0.097451 | 50.06 |
| 300333 | 2016 | 2.598 | 0.05 | 1.011601 | 1.0233364 | 20.61468 | 0.039137 | 24.78 |
| 2587   | 2016 | 0.078 | 0.05 | 1.011601 | 1.0233364 | 20.95695 | 0.096996 | 28.36 |
| 12     | 2016 | -0.24 | 0.05 | 1.011601 | 1.0233364 | 23.56508 | 0.098931 | 15.45 |
| 2215   | 2016 | 0.58  | 0.05 | 1.011601 | 1.0233364 | 21.87017 | -0.15868 | 27.56 |
| 2724   | 2016 | 0.546 | 0.05 | 1.011601 | 1.0233364 | 20.92151 | 0.068194 | 70.42 |
| 2334   | 2016 | 1.063 | 0.05 | 1.011601 | 1.0233364 | 21.67227 | 0.038089 | 17.73 |
| 300136 | 2016 | 0.929 | 0.05 | 1.011601 | 1.0233364 | 21.87485 | 0.268381 | 23.88 |
| 300241 | 2016 | -0.36 | 0.05 | 1.011601 | 1.0233364 | 21.36223 | 0.048855 | 26.52 |
| 2130   | 2016 | 0.012 | 0.05 | 1.011601 | 1.0233364 | 22.4023  | 0.040041 | 24.64 |
| 2436   | 2016 | 0.3   | 0.05 | 1.011601 | 1.0233364 | 22.17036 | 0.09118  | 17.77 |
| 2388   | 2016 | -0.02 | 0.05 | 1.011601 | 1.0233364 | 20.95417 | 0.016977 | 48.09 |
| 2191   | 2016 | -0.09 | 0.05 | 1.011601 | 1.0233364 | 22.62249 | 0.132569 | 32.73 |
| 600525 | 2016 | 0.452 | 0.05 | 1.011601 | 1.0233364 | 23.47182 | 0.094461 | 7.84  |
| 2139   | 2016 | 0.118 | 0.05 | 1.011601 | 1.0233364 | 21.72216 | 0.083375 | 19.61 |
| 2786   | 2016 | -0.31 | 0.05 | 1.011601 | 1.0233364 | 21.86134 | 0.097421 | 35.74 |
| 300044 | 2016 | 0.946 | 0.05 | 1.011601 | 1.0233364 | 21.45423 | 0.113346 | 18.53 |
| 300042 | 2016 | -0.55 | 0.05 | 1.011601 | 1.0233364 | 20.6448  | 0.050609 | 21.63 |
| 2334   | 2016 | 1.284 | 0.05 | 1.011601 | 1.0233364 | 21.67227 | 0.038089 | 17.73 |
| 2736   | 2016 | -0.94 | 0.05 | 1.011601 | 1.0233364 | 25.74206 | 0.09405  | 33.53 |
| 300193 | 2016 | 0.006 | 0.05 | 1.011601 | 1.0233364 | 21.6707  | 0.048537 | 19.66 |
| 300199 | 2016 | 0.441 | 0.05 | 1.011601 | 1.0233364 | 22.21774 | 0.080987 | 25.82 |
| 2456   | 2016 | 0.233 | 0.05 | 1.011601 | 1.0233364 | 23.87746 | 0.089165 | 19.28 |
| 300207 | 2016 | -0.1  | 0.05 | 1.011601 | 1.0233364 | 22.84299 | 0.189625 | 33.79 |
| 2303   | 2016 | -0.7  | 0.05 | 1.011601 | 1.0233364 | 22.29515 | 0.054002 | 42.44 |
| 2294   | 2016 | 1.014 | 0.05 | 1.011601 | 1.0233364 | 22.60031 | 0.254583 | 67.73 |
| 2660   | 2016 | -0.36 | 0.05 | 1.011601 | 1.0233364 | 21.54469 | 0.013342 | 30.34 |

|        |      |       |      |          |           |          |          |       |
|--------|------|-------|------|----------|-----------|----------|----------|-------|
| 2170   | 2016 | 0.412 | 0.05 | 1.011601 | 1.0233364 | 22.15743 | 0.024766 | 27.07 |
| 300124 | 2016 | 0.304 | 0.05 | 1.011601 | 1.0233364 | 22.3219  | 0.196731 | 19.26 |
| 600525 | 2016 | -0.14 | 0.05 | 1.011601 | 1.0233364 | 23.47182 | 0.094461 | 7.84  |
| 600380 | 2016 | 0.771 | 0.05 | 1.011601 | 1.0233364 | 23.50033 | 0.104385 | 46.78 |
| 600525 | 2016 | 0.837 | 0.05 | 1.011601 | 1.0233364 | 23.47182 | 0.094461 | 7.84  |
| 69     | 2016 | -0.54 | 0.05 | 1.011601 | 1.0233364 | 25.70923 | 0.151944 | 53.47 |
| 600525 | 2016 | 0.302 | 0.05 | 1.011601 | 1.0233364 | 23.47182 | 0.094461 | 7.84  |
| 2301   | 2016 | 0.018 | 0.05 | 1.011601 | 1.0233364 | 22.05791 | 0.083717 | 49.41 |
| 2218   | 2016 | -0.27 | 0.05 | 1.011601 | 1.0233364 | 22.29269 | 0.047604 | 32.55 |
| 32     | 2016 | -0.58 | 0.05 | 1.011601 | 1.0233364 | 21.39387 | 0.029528 | 49.18 |
| 2052   | 2016 | 0.767 | 0.05 | 1.011601 | 1.0233364 | 21.47515 | -0.4336  | 16.5  |
| 66     | 2016 | -0.18 | 0.05 | 1.011601 | 1.0233364 | 24.43344 | 0.022581 | 53.92 |
| 2359   | 2016 | -0.59 | 0.05 | 1.011601 | 1.0233364 | 21.22251 | -0.05424 | 31.87 |
| 2121   | 2016 | 0.672 | 0.05 | 1.011601 | 1.0233364 | 23.22664 | 0.099215 | 40.95 |
| 2191   | 2016 | -0.09 | 0.05 | 1.011601 | 1.0233364 | 22.62249 | 0.132569 | 32.73 |
| 2161   | 2016 | 0.602 | 0.05 | 1.011601 | 1.0233364 | 21.44514 | 0.02323  | 24.39 |
| 2055   | 2016 | -0.62 | 0.05 | 1.011601 | 1.0233364 | 22.67478 | -0.00771 | 31.03 |
| 2106   | 2016 | 0.457 | 0.05 | 1.011601 | 1.0233364 | 22.25953 | 0.059913 | 20.84 |
| 2356   | 2016 | -0.15 | 0.05 | 1.011601 | 1.0233364 | 22.28051 | 0.088833 | 49.28 |
| 2055   | 2016 | -0.39 | 0.05 | 1.011601 | 1.0233364 | 22.67478 | -0.00771 | 31.03 |
| 2314   | 2016 | -0.91 | 0.05 | 1.011601 | 1.0233364 | 23.41221 | 0.092596 | 50.03 |
| 21     | 2016 | 0.174 | 0.05 | 1.011601 | 1.0233364 | 23.18434 | 0.042237 | 44.51 |
| 300457 | 2016 | 0.022 | 0.05 | 1.011601 | 1.0233364 | 21.30455 | 0.199897 | 45.27 |
| 300303 | 2016 | -0.6  | 0.05 | 1.011601 | 1.0233364 | 21.78851 | 0.083451 | 22.94 |
| 21     | 2016 | -0.36 | 0.05 | 1.011601 | 1.0233364 | 23.18434 | 0.042237 | 44.51 |
| 2303   | 2016 | -0.46 | 0.05 | 1.011601 | 1.0233364 | 22.29515 | 0.054002 | 42.44 |
| 39     | 2016 | 0.203 | 0.05 | 1.011601 | 1.0233364 | 25.54849 | 0.018781 | 55.44 |
| 300199 | 2016 | 0.846 | 0.05 | 1.011601 | 1.0233364 | 22.04329 | 0.080987 | 25.82 |
| 2334   | 2016 | 0.963 | 0.05 | 1.011601 | 1.0233364 | 21.67227 | 0.038089 | 17.73 |
| 2130   | 2016 | -0.28 | 0.05 | 1.011601 | 1.0233364 | 22.4023  | 0.040041 | 24.64 |
| 2163   | 2016 | -0.13 | 0.05 | 1.011601 | 1.0233364 | 22.63495 | -0.06801 | 13.74 |
| 300319 | 2016 | 0.244 | 0.05 | 1.011601 | 1.0233364 | 21.86227 | 0.068369 | 27.44 |
| 12     | 2016 | -0.05 | 0.05 | 1.011601 | 1.0233364 | 23.56508 | 0.098931 | 15.45 |
| 68     | 2016 | 1.142 | 0.05 | 1.011601 | 1.0233364 | 20.62074 | 0.010892 | 26.43 |
| 2402   | 2016 | -0.06 | 0.05 | 1.011601 | 1.0233364 | 21.19263 | 0.112704 | 17.88 |
| 300151 | 2016 | -0.51 | 0.05 | 1.011601 | 1.0233364 | 20.73055 | 0.039047 | 45.86 |
| 39     | 2016 | -0.84 | 0.05 | 1.011601 | 1.0233364 | 25.54849 | 0.018781 | 55.44 |
| 2587   | 2016 | 0.203 | 0.05 | 1.011601 | 1.0233364 | 20.95695 | 0.096996 | 28.36 |
| 300037 | 2016 | 1.007 | 0.05 | 1.011601 | 1.0233364 | 21.75186 | 0.119079 | 15.51 |
| 600525 | 2016 | 0.383 | 0.05 | 1.011601 | 1.0233364 | 23.47182 | 0.094461 | 7.84  |
| 49     | 2016 | -0.2  | 0.05 | 1.011601 | 1.0233364 | 22.36145 | 0.233108 | 45.23 |
| 2191   | 2016 | -0.54 | 0.05 | 1.011601 | 1.0233364 | 22.62249 | 0.132569 | 32.73 |
| 2341   | 2016 | 0.126 | 0.05 | 1.011601 | 1.0233364 | 22.56267 | 0.014917 | 27.04 |
| 2620   | 2016 | -0.25 | 0.05 | 1.011601 | 1.0233364 | 22.03986 | 0.042149 | 21.05 |
| 2654   | 2016 | -0.44 | 0.05 | 1.011601 | 1.0233364 | 21.91507 | 0.066087 | 17.25 |
| 2402   | 2016 | -0.52 | 0.05 | 1.011601 | 1.0233364 | 21.19263 | 0.112704 | 17.88 |
| 70     | 2016 | -0.07 | 0.05 | 1.011601 | 1.0233364 | 22.34572 | 0.032292 | 39.18 |
| 2733   | 2016 | -0.05 | 0.05 | 1.011601 | 1.0233364 | 21.66658 | 0.054154 | 36.26 |
| 2215   | 2016 | -0.55 | 0.05 | 1.011601 | 1.0233364 | 21.87017 | -0.15868 | 27.56 |
| 600525 | 2016 | -0.14 | 0.05 | 1.011601 | 1.0233364 | 23.47182 | 0.094461 | 7.84  |
| 2121   | 2016 | 0.01  | 0.05 | 1.011601 | 1.0233364 | 23.22664 | 0.099215 | 40.95 |
| 300130 | 2016 | 1.396 | 0.05 | 1.011601 | 1.0233364 | 21.75173 | 0.097748 | 32.55 |
| 55     | 2016 | 0.097 | 0.05 | 1.011601 | 1.0233364 | 22.63828 | 0.187623 | 8.72  |
| 39     | 2016 | -0.28 | 0.05 | 1.011601 | 1.0233364 | 25.54849 | 0.018781 | 55.44 |

|        |      |       |      |          |           |          |          |       |
|--------|------|-------|------|----------|-----------|----------|----------|-------|
| 16     | 2016 | -0.57 | 0.05 | 1.011601 | 1.0233364 | 23.57068 | 0.027776 | 21.75 |
| 2341   | 2016 | -0.63 | 0.05 | 1.011601 | 1.0233364 | 22.56267 | 0.014917 | 27.04 |
| 300162 | 2016 | 0.051 | 0.05 | 1.011601 | 1.0233364 | 21.12846 | 0.026709 | 22.53 |
| 2215   | 2016 | -0.22 | 0.05 | 1.011601 | 1.0233364 | 21.87017 | -0.15868 | 27.56 |
| 2340   | 2016 | -0.47 | 0.05 | 1.011601 | 1.0233364 | 23.6715  | 0.041603 | 12.54 |
| 300269 | 2016 | 0.7   | 0.05 | 1.011601 | 1.0233364 | 22.51368 | 0.07484  | 18.8  |
| 2340   | 2016 | 0.645 | 0.05 | 1.011601 | 1.0233364 | 23.6715  | 0.041603 | 12.54 |
| 69     | 2016 | -0.54 | 0.05 | 1.011601 | 1.0233364 | 25.70923 | 0.094797 | 53.47 |
| 4      | 2016 | 0.034 | 0.05 | 1.011601 | 1.0233364 | 20.10336 | 0.302158 | 28.42 |
| 69     | 2016 | -0.83 | 0.05 | 1.011601 | 1.0233364 | 25.70923 | 0.094797 | 53.47 |
| 2388   | 2016 | 0.514 | 0.05 | 1.011601 | 1.0233364 | 20.95417 | 0.016977 | 48.09 |
| 2137   | 2016 | -0.44 | 0.05 | 1.011601 | 1.0233364 | 21.36708 | 0.093442 | 38.18 |
| 300115 | 2016 | 0.306 | 0.05 | 1.011601 | 1.0233364 | 22.82527 | 0.167006 | 47.19 |
| 2289   | 2016 | 0.405 | 0.05 | 1.011601 | 1.0233364 | 21.11097 | 0.044712 | 8.42  |
| 9      | 2016 | -0.29 | 0.05 | 1.011601 | 1.0233364 | 23.79702 | -0.02796 | 11.91 |
| 63     | 2016 | 0.899 | 0.05 | 1.011601 | 1.0233364 | 25.67656 | -0.19898 | 30.35 |
| 2724   | 2016 | 0.81  | 0.05 | 1.011601 | 1.0233364 | 21.35706 | 0.068194 | 70.42 |
| 2139   | 2016 | 0.118 | 0.05 | 1.011601 | 1.0233364 | 21.72216 | 0.083375 | 19.61 |
| 2008   | 2016 | 0.074 | 0.05 | 1.011601 | 1.0233364 | 23.06213 | 0.135965 | 17.64 |
| 2352   | 2016 | -0.26 | 0.05 | 1.011601 | 1.0233364 | 24.51052 | 0.202406 | 42.9  |
| 2766   | 2016 | -0.12 | 0.05 | 1.011601 | 1.0233364 | 21.30138 | -0.0713  | 48.49 |
| 2215   | 2016 | -0.48 | 0.05 | 1.011601 | 1.0233364 | 21.87017 | -0.15868 | 27.56 |
| 2672   | 2016 | 0.682 | 0.05 | 1.011601 | 1.0233364 | 22.53972 | 0.149297 | 22.56 |
| 50     | 2016 | 1.024 | 0.05 | 1.011601 | 1.0233364 | 23.79963 | 0.041368 | 20.81 |
| 2594   | 2016 | 0.064 | 0.05 | 1.011601 | 1.0233364 | 25.70049 | 0.0989   | 25.24 |
| 2227   | 2016 | 1.138 | 0.05 | 1.011601 | 1.0233364 | 20.72384 | 0.011367 | 57.57 |
| 2660   | 2016 | -0.64 | 0.05 | 1.011601 | 1.0233364 | 21.1595  | 0.013342 | 30.34 |
| 2594   | 2016 | -0.57 | 0.05 | 1.011601 | 1.0233364 | 25.70049 | 0.0989   | 25.24 |
| 2170   | 2016 | 0.114 | 0.05 | 1.011601 | 1.0233364 | 22.15743 | 0.024766 | 27.07 |
| 600525 | 2016 | 0.191 | 0.05 | 1.011601 | 1.0233364 | 23.47182 | 0.094461 | 7.84  |
| 2161   | 2016 | 1.565 | 0.05 | 1.011601 | 1.0233364 | 21.48089 | 0.02323  | 24.39 |
| 300199 | 2016 | 0.441 | 0.05 | 1.011601 | 1.0233364 | 22.21774 | 0.080987 | 25.82 |
| 49     | 2016 | -0.31 | 0.05 | 1.011601 | 1.0233364 | 22.36145 | 0.233108 | 45.23 |
| 2008   | 2016 | -0.06 | 0.05 | 1.011601 | 1.0233364 | 23.06213 | 0.135965 | 17.64 |
| 12     | 2016 | -0.22 | 0.05 | 1.011601 | 1.0233364 | 23.56508 | 0.098931 | 15.45 |
| 39     | 2016 | -0.18 | 0.05 | 1.011601 | 1.0233364 | 25.54849 | 0.018781 | 55.44 |
| 2170   | 2016 | 0.404 | 0.05 | 1.011601 | 1.0233364 | 22.15743 | 0.024766 | 27.07 |
| 2781   | 2016 | 0.426 | 0.05 | 1.011601 | 1.0233364 | 22.00159 | 0.066662 | 42.3  |
| 300193 | 2016 | -0.13 | 0.05 | 1.011601 | 1.0233364 | 21.63289 | 0.048537 | 19.66 |
| 2243   | 2016 | -0.54 | 0.05 | 1.011601 | 1.0233364 | 21.31653 | 0.022429 | 51.52 |
| 2170   | 2016 | 0.536 | 0.05 | 1.011601 | 1.0233364 | 22.15743 | 0.024766 | 27.07 |
| 600380 | 2016 | 0.514 | 0.05 | 1.011601 | 1.0233364 | 23.50033 | 0.104385 | 46.78 |
| 2215   | 2016 | -0.22 | 0.05 | 1.011601 | 1.0233364 | 21.87017 | -0.15868 | 27.56 |
| 300044 | 2016 | 0.342 | 0.05 | 1.011601 | 1.0233364 | 21.45423 | 0.113346 | 18.53 |
| 2577   | 2016 | -0.39 | 0.05 | 1.011601 | 1.0233364 | 20.99223 | 0.000995 | 62.29 |
| 300115 | 2016 | 0.865 | 0.05 | 1.011601 | 1.0233364 | 22.82527 | 0.167006 | 47.19 |
| 2551   | 2016 | -0.67 | 0.05 | 1.011601 | 1.0233364 | 22.124   | 0.062795 | 41.91 |
| 70     | 2016 | -0.05 | 0.05 | 1.011601 | 1.0233364 | 22.34572 | 0.032292 | 39.18 |
| 70     | 2016 | -0.56 | 0.05 | 1.011601 | 1.0233364 | 22.34572 | 0.032292 | 39.18 |
| 600525 | 2016 | -0.14 | 0.05 | 1.011601 | 1.0233364 | 23.47182 | 0.094461 | 7.84  |
| 300151 | 2016 | -0.52 | 0.05 | 1.011601 | 1.0233364 | 20.73055 | 0.039047 | 45.86 |
| 50     | 2016 | 0.963 | 0.05 | 1.011601 | 1.0233364 | 23.79963 | 0.041368 | 20.81 |
| 300115 | 2016 | 0.361 | 0.05 | 1.011601 | 1.0233364 | 22.82527 | 0.167006 | 47.19 |
| 2215   | 2016 | 0.58  | 0.05 | 1.011601 | 1.0233364 | 21.87017 | -0.15868 | 27.56 |

|        |      |       |      |          |           |          |          |       |
|--------|------|-------|------|----------|-----------|----------|----------|-------|
| 62     | 2016 | -0.23 | 0.05 | 1.011601 | 1.0233364 | 22.65806 | 0.066322 | 70.76 |
| 2352   | 2016 | -0.39 | 0.05 | 1.011601 | 1.0233364 | 24.51052 | 0.202406 | 42.9  |
| 2681   | 2016 | -0.05 | 0.05 | 1.011601 | 1.0233364 | 22.14544 | 0.136136 | 44.54 |
| 300264 | 2016 | 1.328 | 0.05 | 1.011601 | 1.0233364 | 20.61337 | 0.010715 | 29.49 |
| 55     | 2016 | -0.46 | 0.05 | 1.011601 | 1.0233364 | 21.61037 | 0.187623 | 8.72  |
| 300206 | 2016 | 1.384 | 0.05 | 1.011601 | 1.0233364 | 21.10676 | 0.01588  | 20.86 |
| 300131 | 2016 | 0.14  | 0.05 | 1.011601 | 1.0233364 | 22.00885 | 0.107811 | 26.55 |
| 300134 | 2016 | -0.48 | 0.05 | 1.011601 | 1.0233364 | 22.77646 | 0.021913 | 43.39 |
| 300232 | 2016 | -0.2  | 0.05 | 1.011601 | 1.0233364 | 21.68096 | 0.109479 | 43.28 |
| 39     | 2016 | -0.44 | 0.05 | 1.011601 | 1.0233364 | 25.54849 | 0.018781 | 55.44 |
| 2388   | 2016 | -0.17 | 0.05 | 1.011601 | 1.0233364 | 20.95417 | 0.016977 | 48.09 |
| 2008   | 2016 | 0.022 | 0.05 | 1.011601 | 1.0233364 | 23.06213 | 0.135965 | 17.64 |
| 300241 | 2016 | -0.22 | 0.05 | 1.011601 | 1.0233364 | 21.36223 | 0.048855 | 26.52 |
| 300235 | 2016 | 2.296 | 0.05 | 1.011601 | 1.0233364 | 20.10336 | 0.050475 | 22.65 |
| 2587   | 2016 | -0.06 | 0.05 | 1.011601 | 1.0233364 | 20.95695 | 0.096996 | 28.36 |
| 2436   | 2016 | 0.3   | 0.05 | 1.011601 | 1.0233364 | 22.17036 | 0.09118  | 17.77 |
| 2191   | 2016 | -0.09 | 0.05 | 1.011601 | 1.0233364 | 22.62249 | 0.132569 | 32.73 |
| 2218   | 2016 | -0.24 | 0.05 | 1.011601 | 1.0233364 | 22.17918 | 0.047604 | 32.55 |
| 2055   | 2016 | -0.07 | 0.05 | 1.011601 | 1.0233364 | 22.67478 | -0.00771 | 31.03 |
| 2594   | 2016 | 0.064 | 0.05 | 1.011601 | 1.0233364 | 24.65795 | 0.0989   | 25.24 |
| 2583   | 2016 | 1.077 | 0.05 | 1.011601 | 1.0233364 | 22.64138 | 0.084508 | 51.66 |
| 2334   | 2016 | 0.401 | 0.05 | 1.011601 | 1.0233364 | 21.67227 | 0.038089 | 17.73 |
| 2735   | 2016 | -0.16 | 0.05 | 1.011601 | 1.0233364 | 20.23565 | 0.07888  | 54.23 |
| 26     | 2016 | -0.48 | 0.05 | 1.011601 | 1.0233364 | 22.11078 | 0.046475 | 37.15 |
| 2215   | 2016 | -0.22 | 0.05 | 1.011601 | 1.0233364 | 21.87017 | -0.15868 | 27.56 |
| 2008   | 2016 | 0.737 | 0.05 | 1.011601 | 1.0233364 | 23.06213 | 0.135965 | 17.64 |
| 2139   | 2016 | -0.39 | 0.05 | 1.011601 | 1.0233364 | 21.72216 | 0.083375 | 19.61 |
| 603118 | 2016 | 0.194 | 0.05 | 1.011601 | 1.0233364 | 22.65879 | 0.079281 | 24.95 |
| 600525 | 2016 | 0.302 | 0.05 | 1.011601 | 1.0233364 | 23.47182 | 0.094461 | 7.84  |
| 555    | 2016 | 0.005 | 0.05 | 1.011601 | 1.0233364 | 22.03312 | 0.054547 | 40.43 |
| 300197 | 2016 | -0.12 | 0.05 | 1.011601 | 1.0233364 | 23.16034 | 0.100676 | 40.74 |
| 300197 | 2016 | -0.11 | 0.05 | 1.011601 | 1.0233364 | 23.16034 | 0.100676 | 40.74 |
| 555    | 2016 | 1.33  | 0.05 | 1.011601 | 1.0233364 | 22.97437 | 0.054547 | 40.43 |
| 2388   | 2016 | -0.17 | 0.05 | 1.011601 | 1.0233364 | 20.84476 | 0.016977 | 48.09 |
| 2139   | 2016 | 0.364 | 0.05 | 1.011601 | 1.0233364 | 21.72216 | 0.083375 | 19.61 |
| 2359   | 2016 | -0.59 | 0.05 | 1.011601 | 1.0233364 | 21.22251 | -0.05424 | 31.87 |
| 2121   | 2016 | 0.295 | 0.05 | 1.011601 | 1.0233364 | 23.22664 | 0.099215 | 40.95 |
| 2475   | 2016 | -0.4  | 0.05 | 1.011601 | 1.0233364 | 23.76563 | 0.097451 | 50.06 |
| 2359   | 2016 | -0.59 | 0.05 | 1.011601 | 1.0233364 | 21.22251 | -0.05424 | 31.87 |
| 300457 | 2016 | -0.05 | 0.05 | 1.011601 | 1.0233364 | 21.30455 | 0.199897 | 45.27 |
| 2551   | 2016 | -0.67 | 0.05 | 1.011601 | 1.0233364 | 22.124   | 0.062795 | 41.91 |
| 2660   | 2016 | -0.64 | 0.05 | 1.011601 | 1.0233364 | 21.54469 | 0.013342 | 30.34 |
| 300130 | 2016 | 0.715 | 0.05 | 1.011601 | 1.0233364 | 21.75173 | 0.097748 | 32.55 |
| 300112 | 2016 | 0.156 | 0.05 | 1.011601 | 1.0233364 | 20.66041 | 0.03708  | 21.72 |
| 300167 | 2016 | 0.36  | 0.05 | 1.011601 | 1.0233364 | 21.03489 | 0.037586 | 39.99 |
| 2583   | 2016 | 0.558 | 0.05 | 1.011601 | 1.0233364 | 22.64138 | 0.084508 | 51.66 |
| 27     | 2016 | -0.68 | 0.05 | 1.011601 | 1.0233364 | 24.19158 | 0.056656 | 47.82 |
| 300241 | 2016 | -0.7  | 0.05 | 1.011601 | 1.0233364 | 21.23327 | 0.048855 | 26.52 |
| 300124 | 2016 | 0.38  | 0.05 | 1.011601 | 1.0233364 | 22.3219  | 0.196731 | 19.26 |
| 2475   | 2016 | -0.21 | 0.05 | 1.011601 | 1.0233364 | 23.76563 | 0.097451 | 50.06 |
| 300162 | 2016 | -0.02 | 0.05 | 1.011601 | 1.0233364 | 21.12846 | 0.026709 | 22.53 |
| 2334   | 2016 | 0.401 | 0.05 | 1.011601 | 1.0233364 | 21.67227 | 0.038089 | 17.73 |
| 21     | 2016 | -0.92 | 0.05 | 1.011601 | 1.0233364 | 23.18434 | 0.042237 | 44.51 |
| 2008   | 2016 | 0.722 | 0.05 | 1.011601 | 1.0233364 | 23.06213 | 0.135965 | 17.64 |

|        |      |       |      |          |           |          |          |       |
|--------|------|-------|------|----------|-----------|----------|----------|-------|
| 603118 | 2016 | 0.172 | 0.05 | 1.011601 | 1.0233364 | 22.65879 | 0.079281 | 24.95 |
| 63     | 2016 | 1.029 | 0.05 | 1.011601 | 1.0233364 | 25.67656 | -0.03444 | 30.35 |
| 300232 | 2016 | -0.4  | 0.05 | 1.011601 | 1.0233364 | 21.56545 | 0.109479 | 43.28 |
| 2548   | 2016 | 0.205 | 0.05 | 1.011601 | 1.0233364 | 21.9494  | 0.089097 | 40.95 |
| 300124 | 2016 | 0.304 | 0.05 | 1.011601 | 1.0233364 | 22.79944 | 0.196731 | 19.26 |
| 66     | 2016 | -0.12 | 0.05 | 1.011601 | 1.0233364 | 24.43344 | 0.022581 | 53.92 |
| 999    | 2016 | -0.17 | 0.05 | 1.011601 | 1.0233364 | 23.32978 | 0.138483 | 63.6  |
| 999    | 2016 | -0.81 | 0.05 | 1.011601 | 1.0233364 | 23.32978 | 0.138483 | 63.6  |
| 2341   | 2016 | -0.63 | 0.05 | 1.011601 | 1.0233364 | 22.39253 | 0.014917 | 27.04 |
| 2008   | 2016 | 0.074 | 0.05 | 1.011601 | 1.0233364 | 23.06213 | 0.135965 | 17.64 |
| 32     | 2016 | -0.42 | 0.05 | 1.011601 | 1.0233364 | 21.39387 | 0.029528 | 49.18 |
| 300130 | 2016 | 1.396 | 0.05 | 1.011601 | 1.0233364 | 21.75173 | 0.097748 | 32.55 |
| 2341   | 2016 | -0.63 | 0.05 | 1.011601 | 1.0233364 | 22.56267 | 0.014917 | 27.04 |
| 28     | 2016 | 0.507 | 0.05 | 1.011601 | 1.0233364 | 23.78257 | 0.081732 | 51    |
| 2161   | 2016 | 1.565 | 0.05 | 1.011601 | 1.0233364 | 21.48089 | 0.02323  | 24.39 |
| 2197   | 2016 | 0.83  | 0.05 | 1.011601 | 1.0233364 | 22.28122 | 0.018141 | 20.14 |
| 39     | 2016 | 0.203 | 0.05 | 1.011601 | 1.0233364 | 25.54849 | 0.018781 | 55.44 |
| 2341   | 2016 | 0.008 | 0.05 | 1.011601 | 1.0233364 | 22.56267 | 0.014917 | 27.04 |
| 2518   | 2016 | -0.4  | 0.05 | 1.011601 | 1.0233364 | 21.76063 | 0.15033  | 60.1  |
| 2055   | 2016 | 0.703 | 0.05 | 1.011601 | 1.0233364 | 22.67478 | -0.00771 | 31.03 |
| 4      | 2016 | 0.034 | 0.05 | 1.011601 | 1.0233364 | 20.10336 | 0.302158 | 28.42 |
| 600380 | 2016 | 0.598 | 0.05 | 1.011601 | 1.0233364 | 23.50033 | 0.104385 | 46.78 |
| 2518   | 2016 | -0.38 | 0.05 | 1.011601 | 1.0233364 | 21.76063 | 0.15033  | 60.1  |
| 300052 | 2016 | 1.025 | 0.05 | 1.011601 | 1.0233364 | 20.82295 | -0.06717 | 27.28 |
| 300206 | 2016 | 1.328 | 0.05 | 1.011601 | 1.0233364 | 21.10676 | 0.01588  | 20.86 |
| 2594   | 2016 | -0.57 | 0.05 | 1.011601 | 1.0233364 | 25.70049 | 0.0989   | 25.24 |
| 2356   | 2016 | -0.46 | 0.05 | 1.011601 | 1.0233364 | 22.28051 | 0.088833 | 49.28 |
| 55     | 2016 | -0.54 | 0.05 | 1.011601 | 1.0233364 | 22.63828 | 0.187623 | 8.72  |
| 16     | 2016 | -0.51 | 0.05 | 1.011601 | 1.0233364 | 23.57068 | 0.027776 | 21.75 |
| 300207 | 2016 | 0.039 | 0.05 | 1.011601 | 1.0233364 | 22.84299 | 0.189625 | 33.79 |
| 300227 | 2016 | 0.068 | 0.05 | 1.011601 | 1.0233364 | 20.35189 | 0.034836 | 19.62 |
| 2238   | 2016 | -0.49 | 0.05 | 1.011601 | 1.0233364 | 22.05363 | 0.110719 | 57.77 |
| 2008   | 2016 | 0.678 | 0.05 | 1.011601 | 1.0233364 | 23.06213 | 0.135965 | 17.64 |
| 2121   | 2016 | 0.412 | 0.05 | 1.011601 | 1.0233364 | 23.22664 | 0.099215 | 40.95 |
| 600380 | 2016 | 0.771 | 0.05 | 1.011601 | 1.0233364 | 23.50033 | 0.104385 | 46.78 |
| 2654   | 2016 | -0.53 | 0.05 | 1.011601 | 1.0233364 | 21.91507 | 0.066087 | 17.25 |
| 2161   | 2016 | 0.697 | 0.05 | 1.011601 | 1.0233364 | 21.48089 | 0.02323  | 24.39 |
| 2782   | 2016 | -0.79 | 0.05 | 1.011601 | 1.0233364 | 20.75777 | 0.07204  | 35.56 |
| 68     | 2016 | 0.632 | 0.05 | 1.011601 | 1.0233364 | 20.62074 | 0.010892 | 26.43 |
| 39     | 2016 | -0.04 | 0.05 | 1.011601 | 1.0233364 | 25.54849 | 0.018781 | 55.44 |
| 27     | 2016 | -0.84 | 0.05 | 1.011601 | 1.0233364 | 24.19158 | 0.056656 | 47.82 |
| 2359   | 2016 | -0.59 | 0.05 | 1.011601 | 1.0233364 | 21.22251 | -0.05424 | 31.87 |
| 2733   | 2016 | 0.643 | 0.05 | 1.011601 | 1.0233364 | 21.66658 | 0.054154 | 36.26 |
| 2766   | 2016 | -0.12 | 0.05 | 1.011601 | 1.0233364 | 21.30138 | -0.0713  | 48.49 |
| 600525 | 2016 | 0.837 | 0.05 | 1.011601 | 1.0233364 | 23.47182 | 0.094461 | 7.84  |
| 600525 | 2016 | 0.646 | 0.05 | 1.011601 | 1.0233364 | 23.47182 | 0.094461 | 7.84  |
| 26     | 2016 | -0.92 | 0.05 | 1.011601 | 1.0233364 | 22.11078 | 0.046475 | 37.15 |
| 300052 | 2016 | 1.444 | 0.05 | 1.011601 | 1.0233364 | 20.82295 | -0.06717 | 27.28 |
| 2294   | 2016 | 0.59  | 0.05 | 1.011601 | 1.0233364 | 22.60031 | 0.254583 | 67.73 |
| 2303   | 2016 | -0.21 | 0.05 | 1.011601 | 1.0233364 | 22.29515 | 0.054002 | 42.44 |
| 21     | 2016 | -0.52 | 0.05 | 1.011601 | 1.0233364 | 23.18434 | 0.042237 | 44.51 |
| 2334   | 2016 | 0.766 | 0.05 | 1.011601 | 1.0233364 | 21.67227 | 0.038089 | 17.73 |
| 2303   | 2016 | -0.21 | 0.05 | 1.011601 | 1.0233364 | 22.29515 | 0.054002 | 42.44 |
| 2786   | 2016 | -0.14 | 0.05 | 1.011601 | 1.0233364 | 21.73066 | 0.097421 | 35.74 |

|        |      |       |      |          |           |          |          |       |
|--------|------|-------|------|----------|-----------|----------|----------|-------|
| 2681   | 2016 | -0.05 | 0.05 | 1.011601 | 1.0233364 | 22.14544 | 0.136136 | 44.54 |
| 2456   | 2016 | 0.023 | 0.05 | 1.011601 | 1.0233364 | 23.87746 | 0.089165 | 19.28 |
| 2388   | 2016 | -0.02 | 0.05 | 1.011601 | 1.0233364 | 20.95417 | 0.016977 | 48.09 |
| 2243   | 2016 | -0.01 | 0.05 | 1.011601 | 1.0233364 | 21.31653 | 0.022429 | 51.52 |
| 600446 | 2016 | 1.617 | 0.05 | 1.011601 | 1.0233364 | 21.39869 | 0.163568 | 10.7  |
| 2314   | 2016 | -0.91 | 0.05 | 1.011601 | 1.0233364 | 23.41221 | 0.092596 | 50.03 |
| 2518   | 2016 | -0.38 | 0.05 | 1.011601 | 1.0233364 | 21.76063 | 0.15033  | 60.1  |
| 2052   | 2016 | 0.767 | 0.05 | 1.011601 | 1.0233364 | 21.36908 | -0.4336  | 16.5  |
| 2766   | 2016 | -0.12 | 0.05 | 1.011601 | 1.0233364 | 21.30138 | -0.0713  | 48.49 |
| 2316   | 2016 | 0.955 | 0.05 | 1.011601 | 1.0233364 | 21.46274 | -0.00534 | 19.84 |
| 2055   | 2016 | 0.189 | 0.05 | 1.011601 | 1.0233364 | 22.67478 | -0.00771 | 31.03 |
| 2163   | 2016 | -0.12 | 0.05 | 1.011601 | 1.0233364 | 22.63495 | -0.06801 | 13.74 |
| 300317 | 2016 | -0.15 | 0.05 | 1.011601 | 1.0233364 | 22.9325  | 0.074278 | 26.18 |
| 2609   | 2016 | 0.908 | 0.05 | 1.011601 | 1.0233364 | 21.62169 | 0.087596 | 35.42 |
| 60     | 2016 | -0.35 | 0.05 | 1.011601 | 1.0233364 | 23.55466 | 0.069638 | 29.58 |
| 999    | 2016 | -0.81 | 0.05 | 1.011601 | 1.0233364 | 23.32978 | 0.138483 | 63.6  |
| 2055   | 2016 | -0.13 | 0.05 | 1.011601 | 1.0233364 | 21.9879  | -0.00771 | 31.03 |
| 2551   | 2016 | -0.67 | 0.05 | 1.011601 | 1.0233364 | 22.124   | 0.062795 | 41.91 |
| 2735   | 2016 | -0.82 | 0.05 | 1.011601 | 1.0233364 | 20.23565 | 0.07888  | 54.23 |
| 2008   | 2016 | 0.345 | 0.05 | 1.011601 | 1.0233364 | 23.06213 | 0.135965 | 17.64 |
| 300154 | 2016 | -0.22 | 0.05 | 1.011601 | 1.0233364 | 21.32409 | 0.044678 | 39.52 |
| 300134 | 2016 | 0.296 | 0.05 | 1.011601 | 1.0233364 | 22.77646 | 0.021913 | 43.39 |
| 2359   | 2016 | -0.59 | 0.05 | 1.011601 | 1.0233364 | 21.31567 | -0.05424 | 31.87 |
| 300227 | 2016 | 0.227 | 0.05 | 1.011601 | 1.0233364 | 20.10336 | 0.034836 | 19.62 |
| 2548   | 2016 | 0.47  | 0.05 | 1.011601 | 1.0233364 | 21.9494  | 0.089097 | 40.95 |
| 600525 | 2016 | 0.511 | 0.05 | 1.011601 | 1.0233364 | 23.47182 | 0.094461 | 7.84  |
| 2215   | 2016 | -0.22 | 0.05 | 1.011601 | 1.02E+00  | 21.87017 | -0.15868 | 27.56 |
| 300112 | 2016 | 0.093 | 0.05 | 1.011601 | 1.02E+00  | 20.66041 | 0.03708  | 21.72 |
| 19     | 2016 | 0.539 | 0.05 | 1.011601 | 1.02E+00  | 20.88755 | 0.043202 | 19.09 |
| 2429   | 2016 | -0.19 | 0.05 | 1.011601 | 1.02E+00  | 23.23253 | 0.045673 | 54.5  |
| 300252 | 2016 | -0.36 | 0.05 | 1.011601 | 1.02E+00  | 22.12533 | 0.096123 | 34.12 |
| 2008   | 2016 | 0.345 | 0.05 | 1.011601 | 1.02E+00  | 23.06213 | 0.135965 | 17.64 |
| 2008   | 2016 | 0.935 | 0.05 | 1.011601 | 1.02E+00  | 23.06213 | 0.135965 | 17.64 |
| 2314   | 2016 | -0.91 | 0.05 | 1.011601 | 1.02E+00  | 23.41221 | 0.092596 | 50.03 |
| 63     | 2016 | 0.898 | 0.05 | 1.011601 | 1.02E+00  | 25.67656 | -0.19898 | 30.35 |
| 300197 | 2016 | -0.11 | 0.05 | 1.011601 | 1.0233364 | 23.16034 | 0.100676 | 40.74 |
| 39     | 2016 | -0.84 | 0.05 | 1.011601 | 1.0233364 | 25.54849 | 0.018781 | 55.44 |
| 2528   | 2016 | 0.772 | 0.05 | 1.011601 | 1.0233364 | 22.12956 | -0.14593 | 30.73 |
| 2341   | 2016 | 0.4   | 0.05 | 1.011601 | 1.0233364 | 22.56267 | 0.014917 | 27.04 |
| 2197   | 2016 | -0.01 | 0.05 | 1.011601 | 1.0233364 | 22.28122 | 0.018141 | 20.14 |
| 600380 | 2016 | 0.109 | 0.05 | 1.011601 | 1.0233364 | 23.50033 | 0.104385 | 46.78 |
| 2138   | 2016 | -0.35 | 0.05 | 1.011601 | 1.0233364 | 22.11984 | 0.134333 | 11.74 |
| 300197 | 2016 | -0.6  | 0.05 | 1.011601 | 1.0233364 | 23.16034 | 0.100676 | 40.74 |
| 600525 | 2016 | 0.095 | 0.05 | 1.011601 | 1.0233364 | 23.47182 | 0.094461 | 7.84  |
| 2316   | 2016 | 0.955 | 0.05 | 1.011601 | 1.0233364 | 21.4762  | -0.00534 | 19.84 |
| 300134 | 2016 | -0.48 | 0.05 | 1.011601 | 1.0233364 | 22.77646 | 0.021913 | 43.39 |
| 2672   | 2016 | 0.682 | 0.05 | 1.011601 | 1.0233364 | 22.82608 | 0.149297 | 22.56 |
| 2359   | 2016 | -0.59 | 0.05 | 1.011601 | 1.0233364 | 21.22251 | -0.05424 | 31.87 |
| 300311 | 2016 | 1.863 | 0.05 | 1.011601 | 1.0233364 | 21.30365 | 0.098449 | 39.46 |
| 300227 | 2016 | -0.59 | 0.05 | 1.011601 | 1.0233364 | 20.35189 | 0.034836 | 19.62 |
| 300052 | 2016 | 1.522 | 0.05 | 1.011601 | 1.0233364 | 20.82295 | -0.06717 | 27.28 |
| 300131 | 2016 | 0.14  | 0.05 | 1.011601 | 1.0233364 | 22.00885 | 0.107811 | 26.55 |
| 2594   | 2016 | -0.57 | 0.05 | 1.011601 | 1.0233364 | 25.70049 | 0.0989   | 25.24 |
| 45     | 2016 | -0.03 | 0.05 | 1.011601 | 1.0233364 | 22.13902 | -0.02537 | 46.21 |

|        |      |       |      |          |           |          |          |       |
|--------|------|-------|------|----------|-----------|----------|----------|-------|
| 2594   | 2016 | -0.57 | 0.05 | 1.011601 | 1.0233364 | 25.70049 | 0.0989   | 25.24 |
| 66     | 2016 | -0.6  | 0.05 | 1.011601 | 1.0233364 | 24.43344 | 0.004544 | 53.92 |
| 300207 | 2016 | 0.002 | 0.05 | 1.011601 | 1.0233364 | 22.84299 | 0.189625 | 33.79 |
| 2654   | 2016 | -0.32 | 0.05 | 1.011601 | 1.0233364 | 21.91507 | 0.066087 | 17.25 |
| 300269 | 2016 | -0.25 | 0.05 | 1.011601 | 1.0233364 | 22.7288  | 0.07484  | 18.8  |
| 2303   | 2016 | -0.42 | 0.05 | 1.011601 | 1.0233364 | 22.29515 | 0.054002 | 42.44 |
| 300151 | 2016 | -0.51 | 0.05 | 1.011601 | 1.0233364 | 20.73055 | 0.039047 | 45.86 |
| 2594   | 2016 | -0.44 | 0.05 | 1.011601 | 1.0233364 | 25.70049 | 0.0989   | 25.24 |
| 2672   | 2016 | -0.64 | 0.05 | 1.011601 | 1.0233364 | 22.82608 | 0.149297 | 22.56 |
| 9      | 2016 | 0.383 | 0.05 | 1.011601 | 1.0233364 | 23.79702 | -0.02796 | 11.91 |
| 78     | 2016 | 0.39  | 0.05 | 1.011601 | 1.0233364 | 22.58456 | 0.084867 | 45.93 |
| 2105   | 2016 | -0.58 | 0.05 | 1.011601 | 1.0233364 | 21.05476 | 0.027483 | 41.93 |
| 300012 | 2016 | 0.824 | 0.05 | 1.011601 | 1.0233364 | 21.86193 | 0.04517  | 13.81 |
| 1979   | 2016 | -0.33 | 0.05 | 1.011601 | 1.0233364 | 25.74206 | 0.156592 | 66.1  |
| 300269 | 2016 | 0.7   | 0.05 | 1.011601 | 1.0233364 | 22.7288  | 0.07484  | 18.8  |
| 2475   | 2016 | -0.53 | 0.05 | 1.011601 | 1.0233364 | 23.76563 | 0.097451 | 50.06 |
| 300206 | 2016 | 1.894 | 0.05 | 1.011601 | 1.0233364 | 21.10676 | 0.01588  | 20.86 |
| 2369   | 2016 | -0.42 | 0.05 | 1.011601 | 1.0233364 | 21.69089 | 0.008909 | 16.33 |
| 2356   | 2016 | 0.455 | 0.05 | 1.011601 | 1.0233364 | 22.28051 | 0.088833 | 49.28 |
| 2660   | 2016 | -0.64 | 0.05 | 1.011601 | 1.0233364 | 21.54469 | 0.013342 | 30.34 |
| 300124 | 2016 | 0.667 | 0.05 | 1.011601 | 1.0233364 | 22.3219  | 0.196731 | 19.26 |
| 300389 | 2016 | 0.15  | 0.05 | 1.011601 | 1.0233364 | 21.22259 | 0.156125 | 25.51 |
| 2456   | 2016 | 0.233 | 0.05 | 1.011601 | 1.0233364 | 23.87746 | 0.089165 | 19.28 |
| 600525 | 2016 | 0.689 | 0.05 | 1.011601 | 1.0233364 | 23.47182 | 0.094461 | 7.84  |
| 2654   | 2016 | -0.53 | 0.05 | 1.011601 | 1.0233364 | 21.62553 | 0.066087 | 17.25 |
| 39     | 2016 | 0.203 | 0.05 | 1.011601 | 1.0233364 | 25.54849 | 0.018781 | 55.44 |
| 2751   | 2016 | 0.368 | 0.05 | 1.011601 | 1.0233364 | 21.3069  | -0.03011 | 28.41 |
| 300167 | 2016 | 0.36  | 0.05 | 1.011601 | 1.0233364 | 21.03489 | 0.037586 | 39.99 |
| 2528   | 2016 | 1.057 | 0.05 | 1.011601 | 1.0233364 | 22.12956 | -0.14593 | 30.73 |
| 26     | 2016 | -0.7  | 0.05 | 1.011601 | 1.0233364 | 21.94656 | 0.046475 | 37.15 |
| 90     | 2016 | -0.95 | 0.05 | 1.011601 | 1.0233364 | 23.68289 | 0.060213 | 23.47 |
| 2620   | 2016 | -0.25 | 0.05 | 1.011601 | 1.0233364 | 21.91879 | 0.042149 | 21.05 |
| 2402   | 2016 | 0.802 | 0.05 | 1.011601 | 1.0233364 | 21.19263 | 0.112704 | 17.88 |
| 2429   | 2016 | 0.753 | 0.05 | 1.011601 | 1.0233364 | 23.23253 | 0.045673 | 54.5  |
| 2008   | 2016 | 0.671 | 0.05 | 1.011601 | 1.0233364 | 23.06213 | 0.135965 | 17.64 |
| 300319 | 2016 | -0.47 | 0.05 | 1.011601 | 1.0233364 | 21.86227 | 0.068369 | 27.44 |
| 16     | 2016 | -0.46 | 0.05 | 1.011601 | 1.0233364 | 23.57068 | 0.027776 | 21.75 |
| 300085 | 2016 | 0.796 | 0.05 | 1.011601 | 1.0233364 | 20.82185 | 0.09432  | 19.61 |
| 2191   | 2016 | -0.4  | 0.05 | 1.011601 | 1.0233364 | 22.62249 | 0.132569 | 32.73 |
| 32     | 2016 | -0.31 | 0.05 | 1.011601 | 1.0233364 | 21.39387 | 0.029528 | 49.18 |
| 2256   | 2016 | 0.503 | 0.05 | 1.011601 | 1.0233364 | 21.93208 | 0.052194 | 26.23 |
| 300227 | 2016 | 0.068 | 0.05 | 1.011601 | 1.0233364 | 20.35189 | 0.034836 | 19.62 |
| 2399   | 2016 | 0.584 | 0.05 | 1.011601 | 1.0233364 | 23.28155 | 0.047736 | 38.01 |
| 300124 | 2016 | 0.304 | 0.05 | 1.011601 | 1.0233364 | 22.3219  | 0.196731 | 19.26 |
| 12     | 2016 | -0.46 | 0.05 | 1.011601 | 1.0233364 | 23.56508 | 0.098931 | 15.45 |
| 2227   | 2016 | 0.801 | 0.05 | 1.011601 | 1.0233364 | 20.72384 | 0.011367 | 57.57 |
| 2218   | 2016 | -0.34 | 0.05 | 1.011601 | 1.0233364 | 22.29269 | 0.047604 | 32.55 |
| 78     | 2016 | 0.39  | 0.05 | 1.011601 | 1.0233364 | 23.53636 | 0.084867 | 45.93 |
| 2334   | 2016 | 0.963 | 0.05 | 1.011601 | 1.0233364 | 21.67227 | 0.038089 | 17.73 |
| 600525 | 2016 | 0.446 | 0.05 | 1.011601 | 1.0233364 | 23.47182 | 0.094461 | 7.84  |
| 2594   | 2016 | -0.39 | 0.05 | 1.011601 | 1.0233364 | 25.70049 | 0.0989   | 25.24 |
| 2340   | 2016 | 0.645 | 0.05 | 1.011601 | 1.0233364 | 23.6715  | 0.041603 | 12.54 |
| 28     | 2016 | 0.507 | 0.05 | 1.011601 | 1.0233364 | 23.78257 | 0.081732 | 51    |
| 600525 | 2016 | 0.391 | 0.05 | 1.011601 | 1.0233364 | 23.47182 | 0.094461 | 7.84  |



|        |      |       |      |          |           |          |          |       |
|--------|------|-------|------|----------|-----------|----------|----------|-------|
| 300047 | 2016 | 1.299 | 0.05 | 1.011601 | 1.0233364 | 21.88101 | 0.066081 | 13.01 |
| 300269 | 2016 | 0.7   | 0.05 | 1.011601 | 1.0233364 | 22.7288  | 0.07484  | 18.8  |
| 2215   | 2016 | -0.22 | 0.05 | 1.011601 | 1.0233364 | 21.87017 | -0.15868 | 27.56 |
| 9      | 2016 | -0.07 | 0.05 | 1.011601 | 1.0233364 | 23.79702 | -0.02796 | 11.91 |
| 2170   | 2016 | 0.404 | 0.05 | 1.011601 | 1.0233364 | 22.15743 | 0.024766 | 27.07 |
| 600525 | 2016 | 1.186 | 0.05 | 1.011601 | 1.0233364 | 23.47182 | 0.094461 | 7.84  |
| 600525 | 2016 | 0.523 | 0.05 | 1.011601 | 1.0233364 | 23.47182 | 0.094461 | 7.84  |
| 300199 | 2016 | 0.441 | 0.05 | 1.011601 | 1.0233364 | 22.21774 | 0.080987 | 25.82 |
| 600525 | 2016 | 0.837 | 0.05 | 1.011601 | 1.0233364 | 23.47182 | 0.094461 | 7.84  |
| 600525 | 2016 | -0.14 | 0.05 | 1.011601 | 1.0233364 | 23.47182 | 0.094461 | 7.84  |
| 600525 | 2016 | 1.186 | 0.05 | 1.011601 | 1.0233364 | 23.47182 | 0.094461 | 7.84  |
| 12     | 2016 | 0.538 | 0.05 | 1.011601 | 1.0233364 | 23.56508 | 0.098931 | 15.45 |
| 2227   | 2016 | 0.311 | 0.05 | 1.011601 | 1.0233364 | 20.72384 | 0.011367 | 57.57 |
| 2587   | 2016 | -0.06 | 0.05 | 1.011601 | 1.0233364 | 20.95695 | 0.096996 | 28.36 |
| 2163   | 2016 | -0.17 | 0.05 | 1.011601 | 1.0233364 | 22.63495 | -0.06801 | 13.74 |
| 2475   | 2016 | -0.53 | 0.05 | 1.011601 | 1.0233364 | 23.76563 | 0.097451 | 50.06 |
| 2672   | 2016 | -0.41 | 0.05 | 1.011601 | 1.0233364 | 22.82608 | 0.149297 | 22.56 |
| 2356   | 2016 | -0.08 | 0.05 | 1.011601 | 1.0233364 | 21.75293 | 0.088833 | 49.28 |
| 2672   | 2016 | 0.094 | 0.05 | 1.011601 | 1.0233364 | 22.82608 | 0.149297 | 22.56 |
| 2681   | 2016 | -0.07 | 0.05 | 1.011601 | 1.0233364 | 22.14544 | 0.136136 | 44.54 |
| 300252 | 2016 | -0.57 | 0.05 | 1.011601 | 1.0233364 | 22.12533 | 0.096123 | 34.12 |
| 2672   | 2016 | -0.64 | 0.05 | 1.011601 | 1.0233364 | 22.82608 | 0.149297 | 22.56 |
| 2672   | 2016 | 0.094 | 0.05 | 1.011601 | 1.0233364 | 22.82608 | 0.149297 | 22.56 |
| 300151 | 2016 | -0.57 | 0.05 | 1.011601 | 1.0233364 | 20.73055 | 0.039047 | 45.86 |
| 62     | 2016 | -0.23 | 0.05 | 1.011601 | 1.0233364 | 22.18334 | 0.066322 | 70.76 |
| 300457 | 2016 | 0.236 | 0.05 | 1.011601 | 1.0233364 | 20.97443 | 0.199897 | 45.27 |
| 1979   | 2016 | -0.33 | 0.05 | 1.011601 | 1.0233364 | 25.74206 | 0.156592 | 66.1  |
| 300317 | 2016 | -0.59 | 0.05 | 1.011601 | 1.0233364 | 22.9325  | 0.074278 | 26.18 |
| 300047 | 2016 | 1.299 | 0.05 | 1.011601 | 1.0233364 | 21.88101 | 0.066081 | 13.01 |
| 2660   | 2016 | -0.32 | 0.05 | 1.011601 | 1.0233364 | 21.54469 | 0.013342 | 30.34 |
| 2660   | 2016 | -0.64 | 0.05 | 1.011601 | 1.0233364 | 21.54469 | 0.013342 | 30.34 |
| 600446 | 2016 | 1.624 | 0.05 | 1.011601 | 1.0233364 | 21.87843 | 0.163568 | 10.7  |
| 2121   | 2016 | 1.334 | 0.05 | 1.011601 | 1.0233364 | 23.22664 | 0.099215 | 40.95 |
| 300333 | 2016 | 2.598 | 0.05 | 1.011601 | 1.0233364 | 20.61468 | 0.039137 | 24.78 |
| 2654   | 2016 | -0.32 | 0.05 | 1.011601 | 1.0233364 | 21.91507 | 0.066087 | 17.25 |
| 9      | 2016 | -0.64 | 0.05 | 1.011601 | 1.0233364 | 23.79702 | -0.02796 | 11.91 |
| 2583   | 2016 | 0.922 | 0.05 | 1.011601 | 1.0233364 | 22.64138 | 0.084508 | 51.66 |
| 70     | 2016 | 0.103 | 0.05 | 1.011601 | 1.0233364 | 22.34572 | 0.032292 | 39.18 |
| 2130   | 2016 | 0.081 | 0.05 | 1.011601 | 1.0233364 | 22.4023  | 0.040041 | 24.64 |
| 2369   | 2016 | -0.43 | 0.05 | 1.011601 | 1.0233364 | 21.50366 | 0.008909 | 16.33 |
| 2528   | 2016 | 1.057 | 0.05 | 1.011601 | 1.0233364 | 22.01363 | -0.14593 | 30.73 |
| 2191   | 2016 | -0.08 | 0.05 | 1.011601 | 1.0233364 | 22.62249 | 0.132569 | 32.73 |
| 2735   | 2016 | -0.82 | 0.05 | 1.011601 | 1.0233364 | 20.23565 | 0.07888  | 54.23 |
| 300207 | 2016 | -0.6  | 0.05 | 1.011601 | 1.0233364 | 22.84299 | 0.189625 | 33.79 |
| 90     | 2016 | -0.31 | 0.05 | 1.011601 | 1.0233364 | 23.68289 | 0.060213 | 23.47 |
| 39     | 2016 | -0.4  | 0.05 | 1.011601 | 1.0233364 | 25.54849 | 0.018781 | 55.44 |
| 2313   | 2016 | 0.459 | 0.05 | 1.011601 | 1.0233364 | 22.0844  | 0.040307 | 19.69 |
| 39     | 2016 | -0.29 | 0.05 | 1.011601 | 1.0233364 | 25.54849 | 0.018781 | 55.44 |
| 2672   | 2016 | -0.38 | 0.05 | 1.011601 | 1.0233364 | 22.82608 | 0.149297 | 22.56 |
| 999    | 2016 | -0.81 | 0.05 | 1.011601 | 1.0233364 | 23.32978 | 0.138483 | 63.6  |
| 300227 | 2016 | -0.11 | 0.05 | 1.011601 | 1.0233364 | 20.35189 | 0.034836 | 19.62 |
| 2301   | 2016 | 0.018 | 0.05 | 1.011601 | 1.0233364 | 22.05791 | 0.083717 | 49.41 |
| 300197 | 2016 | -0.6  | 0.05 | 1.011601 | 1.0233364 | 23.16034 | 0.100676 | 40.74 |
| 300193 | 2016 | -0.15 | 0.05 | 1.011601 | 1.0233364 | 21.63289 | 0.048537 | 19.66 |

|        |      |       |      |          |           |          |          |       |
|--------|------|-------|------|----------|-----------|----------|----------|-------|
| 2618   | 2016 | 1.291 | 0.05 | 1.011601 | 1.0233364 | 21.58693 | 0.014728 | 30.18 |
| 39     | 2016 | -0.18 | 0.05 | 1.011601 | 1.0233364 | 25.54849 | 0.018781 | 55.44 |
| 2660   | 2016 | -0.32 | 0.05 | 1.011601 | 1.0233364 | 21.54469 | 0.013342 | 30.34 |
| 2218   | 2016 | -0.24 | 0.05 | 1.011601 | 1.0233364 | 22.29269 | 0.047604 | 32.55 |
| 2456   | 2016 | 0.043 | 0.05 | 1.011601 | 1.0233364 | 23.87746 | 0.089165 | 19.28 |
| 300112 | 2016 | -0.29 | 0.05 | 1.011601 | 1.0233364 | 20.66041 | 0.03708  | 21.72 |
| 300269 | 2016 | -0.25 | 0.05 | 1.011601 | 1.0233364 | 22.7288  | 0.07484  | 18.8  |
| 39     | 2016 | 0.203 | 0.05 | 1.011601 | 1.0233364 | 25.54849 | 0.018781 | 55.44 |
| 2609   | 2016 | 0.378 | 0.05 | 1.011601 | 1.0233364 | 21.62169 | 0.087596 | 35.42 |
| 999    | 2016 | -0.81 | 0.05 | 1.011601 | 1.0233364 | 23.32978 | 0.138483 | 63.6  |
| 600525 | 2016 | 0.626 | 0.05 | 1.011601 | 1.0233364 | 23.47182 | 0.094461 | 7.84  |
| 999    | 2016 | -0.37 | 0.05 | 1.011601 | 1.0233364 | 23.32978 | 0.138483 | 63.6  |
| 2733   | 2016 | 0.643 | 0.05 | 1.011601 | 1.0233364 | 21.88693 | 0.054154 | 36.26 |
| 2594   | 2016 | -0.34 | 0.05 | 1.011601 | 1.0233364 | 25.70049 | 0.0989   | 25.24 |
| 2594   | 2016 | -0.09 | 0.05 | 1.011601 | 1.0233364 | 25.70049 | 0.0989   | 25.24 |
| 999    | 2016 | 0.518 | 0.05 | 1.011601 | 1.0233364 | 23.32978 | 0.138483 | 63.6  |
| 2594   | 2016 | -0.57 | 0.05 | 1.011601 | 1.0233364 | 25.70049 | 0.0989   | 25.24 |
| 2594   | 2016 | -0.02 | 0.05 | 1.011601 | 1.0233364 | 25.70049 | 0.0989   | 25.24 |
| 2681   | 2016 | -0.05 | 0.05 | 1.011601 | 1.0233364 | 22.14544 | 0.136136 | 44.54 |
| 300012 | 2016 | -0.37 | 0.05 | 1.011601 | 1.0233364 | 21.86193 | 0.04517  | 13.81 |
| 999    | 2016 | -0.32 | 0.05 | 1.011601 | 1.0233364 | 23.32978 | 0.138483 | 63.6  |
| 2047   | 2016 | -0.57 | 0.05 | 1.011601 | 1.0233364 | 22.21952 | 0.141863 | 21.51 |
| 2786   | 2016 | -0.67 | 0.05 | 1.011601 | 1.0233364 | 21.86134 | 0.097421 | 35.74 |
| 2052   | 2016 | 0.767 | 0.05 | 1.011601 | 1.0233364 | 21.36908 | -0.4336  | 16.5  |
| 2130   | 2016 | 0.036 | 0.05 | 1.011601 | 1.0233364 | 22.4023  | 0.040041 | 24.64 |
| 2138   | 2016 | 0.192 | 0.05 | 1.011601 | 1.0233364 | 22.11984 | 0.134333 | 11.74 |
| 2356   | 2016 | -0.09 | 0.05 | 1.011601 | 1.0233364 | 22.28051 | 0.088833 | 49.28 |
| 2008   | 2016 | -0.06 | 0.05 | 1.011601 | 1.0233364 | 23.06213 | 0.135965 | 17.64 |
| 300130 | 2016 | 0.513 | 0.05 | 1.011601 | 1.0233364 | 21.75173 | 0.097748 | 32.55 |
| 300301 | 2016 | -0.2  | 0.05 | 1.011601 | 1.0233364 | 22.05661 | -0.00327 | 21.02 |
| 78     | 2016 | 0.39  | 0.05 | 1.011601 | 1.0233364 | 23.53636 | 0.084867 | 45.93 |
| 2609   | 2016 | 0.806 | 0.05 | 1.011601 | 1.0233364 | 21.62169 | 0.087596 | 35.42 |
| 2618   | 2016 | 1.463 | 0.05 | 1.011601 | 1.0233364 | 21.49079 | 0.014728 | 30.18 |
| 2334   | 2016 | 0.916 | 0.05 | 1.011601 | 1.0233364 | 21.67227 | 0.038089 | 17.73 |
| 2548   | 2016 | 0.359 | 0.05 | 1.011601 | 1.0233364 | 21.9494  | 0.089097 | 40.95 |
| 2105   | 2016 | -0.69 | 0.05 | 1.011601 | 1.0233364 | 21.05476 | 0.027483 | 41.93 |
| 2475   | 2016 | -0.26 | 0.05 | 1.011601 | 1.0233364 | 23.76563 | 0.097451 | 50.06 |
| 300197 | 2016 | -0.11 | 0.05 | 1.011601 | 1.0233364 | 23.16034 | 0.100676 | 40.74 |
| 70     | 2016 | -0.56 | 0.05 | 1.011601 | 1.0233364 | 22.34572 | 0.111641 | 39.18 |
| 28     | 2016 | 0.556 | 0.05 | 1.011601 | 1.0233364 | 23.78257 | 0.081732 | 51    |
| 9      | 2016 | -0.52 | 0.05 | 1.011601 | 1.0233364 | 23.79702 | -0.02796 | 11.91 |
| 39     | 2016 | 0.487 | 0.05 | 1.011601 | 1.0233364 | 25.54849 | 0.018781 | 55.44 |
| 2163   | 2016 | 0.072 | 0.05 | 1.011601 | 1.0233364 | 22.63495 | -0.06801 | 13.74 |
| 2334   | 2016 | 0.401 | 0.05 | 1.011601 | 1.0233364 | 21.67227 | 0.038089 | 17.73 |
| 2577   | 2016 | -0.39 | 0.05 | 1.011601 | 1.0233364 | 20.99223 | 0.000995 | 62.29 |
| 9      | 2016 | 0.065 | 0.05 | 1.011601 | 1.0233364 | 23.16576 | -0.02796 | 11.91 |
| 2294   | 2016 | 1.014 | 0.05 | 1.011601 | 1.0233364 | 22.60031 | 0.254583 | 67.73 |
| 39     | 2016 | -0.28 | 0.05 | 1.011601 | 1.0233364 | 25.54849 | 0.018781 | 55.44 |
| 300333 | 2016 | 2.598 | 0.05 | 1.011601 | 1.0233364 | 20.61468 | 0.039137 | 24.78 |
| 300199 | 2016 | 0.441 | 0.05 | 1.011601 | 1.0233364 | 22.21774 | 0.080987 | 25.82 |
| 2008   | 2016 | 0.069 | 0.05 | 1.011601 | 1.0233364 | 23.06213 | 0.135965 | 17.64 |
| 2008   | 2016 | 1.267 | 0.05 | 1.011601 | 1.0233364 | 23.06213 | 0.135965 | 17.64 |
| 2008   | 2016 | 0.022 | 0.05 | 1.011601 | 1.0233364 | 23.06213 | 0.135965 | 17.64 |
| 300131 | 2016 | 0.14  | 0.05 | 1.011601 | 1.0233364 | 22.00885 | 0.107811 | 26.55 |

|        |      |       |      |          |           |          |          |       |
|--------|------|-------|------|----------|-----------|----------|----------|-------|
| 12     | 2016 | 0.538 | 0.05 | 1.011601 | 1.0233364 | 23.56508 | 0.098931 | 15.45 |
| 2191   | 2016 | -0.04 | 0.05 | 1.011601 | 1.0233364 | 22.62249 | 0.132569 | 32.73 |
| 2130   | 2016 | -0.26 | 0.05 | 1.011601 | 1.0233364 | 22.4023  | 0.040041 | 24.64 |
| 2256   | 2016 | 0.503 | 0.05 | 1.011601 | 1.0233364 | 21.93208 | 0.052194 | 26.23 |
| 300044 | 2016 | 0.35  | 0.05 | 1.011601 | 1.0233364 | 21.45423 | 0.113346 | 18.53 |
| 300197 | 2016 | -0.43 | 0.05 | 1.011601 | 1.0233364 | 23.16034 | 0.100676 | 40.74 |
| 2052   | 2016 | 0.767 | 0.05 | 1.011601 | 1.0233364 | 21.36908 | -0.4336  | 16.5  |
| 2340   | 2016 | -0.23 | 0.05 | 1.011601 | 1.0233364 | 23.6715  | 0.041603 | 12.54 |
| 2256   | 2016 | 0.732 | 0.05 | 1.011601 | 1.0233364 | 21.93208 | 0.052194 | 26.23 |
| 2551   | 2016 | -0.67 | 0.05 | 1.011601 | 1.0233364 | 22.124   | 0.062795 | 41.91 |
| 300047 | 2016 | 1.299 | 0.05 | 1.011601 | 1.0233364 | 21.76592 | 0.066081 | 13.01 |
| 2724   | 2016 | 0.663 | 0.05 | 1.011601 | 1.0233364 | 21.35706 | 0.068194 | 70.42 |
| 300400 | 2016 | -0.13 | 0.05 | 1.011601 | 1.0233364 | 20.16555 | 0.121419 | 34.05 |
| 999    | 2016 | -0.63 | 0.05 | 1.011601 | 1.0233364 | 23.32978 | 0.138483 | 63.6  |
| 300134 | 2016 | -0.03 | 0.05 | 1.011601 | 1.0233364 | 22.77646 | 0.021913 | 43.39 |
| 2548   | 2016 | 0.47  | 0.05 | 1.011601 | 1.0233364 | 21.9494  | 0.089097 | 40.95 |
| 2008   | 2016 | 0.036 | 0.05 | 1.011601 | 1.0233364 | 23.06213 | 0.135965 | 17.64 |
| 50     | 2016 | 0.953 | 0.05 | 1.011601 | 1.0233364 | 23.79963 | 0.041368 | 20.81 |
| 2008   | 2016 | 0.806 | 0.05 | 1.011601 | 1.0233364 | 23.06213 | 0.135965 | 17.64 |
| 300252 | 2016 | 0.228 | 0.05 | 1.011601 | 1.0233364 | 21.88801 | 0.096123 | 34.12 |
| 90     | 2016 | -0.52 | 0.05 | 1.011601 | 1.0233364 | 23.68289 | 0.060213 | 23.47 |
| 2008   | 2016 | 0.074 | 0.05 | 1.011601 | 1.0233364 | 23.06213 | 0.135965 | 17.64 |
| 2733   | 2016 | -0.68 | 0.05 | 1.011601 | 1.0233364 | 21.66658 | 0.054154 | 36.26 |
| 2763   | 2016 | -0.39 | 0.05 | 1.011601 | 1.0233364 | 21.32755 | 0.11964  | 35.6  |
| 2161   | 2016 | 0.24  | 0.05 | 1.011601 | 1.0233364 | 21.48089 | 0.02323  | 24.39 |
| 2008   | 2016 | 0.457 | 0.05 | 1.011601 | 1.0233364 | 23.06213 | 0.135965 | 17.64 |
| 63     | 2016 | 1.168 | 0.05 | 1.011601 | 1.0233364 | 25.62007 | -0.19898 | 30.35 |
| 2583   | 2016 | 0.922 | 0.05 | 1.011601 | 1.0233364 | 22.56757 | 0.084508 | 51.66 |
| 300134 | 2016 | 0.179 | 0.05 | 1.011601 | 1.0233364 | 22.77646 | 0.021913 | 43.39 |
| 12     | 2016 | 0.366 | 0.05 | 1.011601 | 1.0233364 | 23.56508 | 0.061523 | 15.45 |
| 300112 | 2016 | -0.11 | 0.05 | 1.011601 | 1.0233364 | 20.66041 | 0.03708  | 21.72 |
| 300134 | 2016 | -0.48 | 0.05 | 1.011601 | 1.0233364 | 22.77646 | 0.021913 | 43.39 |
| 2352   | 2016 | -0.16 | 0.05 | 1.011601 | 1.0233364 | 24.51052 | 0.202406 | 42.9  |
| 2456   | 2016 | 0.457 | 0.05 | 1.011601 | 1.0233364 | 23.87746 | 0.089165 | 19.28 |
| 300241 | 2016 | -0.32 | 0.05 | 1.011601 | 1.0233364 | 21.36223 | 0.048855 | 26.52 |
| 12     | 2016 | -0.3  | 0.05 | 1.011601 | 1.0233364 | 23.56508 | 0.098931 | 15.45 |
| 2340   | 2016 | -0.04 | 0.05 | 1.011601 | 1.0233364 | 23.6715  | 0.041603 | 12.54 |
| 39     | 2016 | -0.24 | 0.05 | 1.011601 | 1.0233364 | 25.54849 | 0.018781 | 55.44 |
| 555    | 2016 | 0.774 | 0.05 | 1.011601 | 1.0233364 | 22.97437 | 0.054547 | 40.43 |
| 300115 | 2016 | 0.339 | 0.05 | 1.011601 | 1.0233364 | 22.82527 | 0.167006 | 47.19 |
| 2577   | 2016 | -0.39 | 0.05 | 1.011601 | 1.0233364 | 20.99223 | 0.000995 | 62.29 |
| 9      | 2016 | -0.73 | 0.05 | 1.011601 | 1.0233364 | 23.79702 | -0.02796 | 11.91 |
| 2294   | 2016 | 1.014 | 0.05 | 1.011601 | 1.0233364 | 22.60031 | 0.254583 | 67.73 |
| 27     | 2016 | -0.26 | 0.05 | 1.011601 | 1.0233364 | 24.19158 | 0.056656 | 47.82 |
| 2402   | 2016 | 0.136 | 0.05 | 1.011601 | 1.0233364 | 21.19263 | 0.112704 | 17.88 |
| 2340   | 2016 | -0.44 | 0.05 | 1.011601 | 1.0233364 | 23.6715  | 0.041603 | 12.54 |
| 300154 | 2016 | -0.22 | 0.05 | 1.011601 | 1.0233364 | 21.30185 | 0.044678 | 39.52 |
| 39     | 2016 | -0.84 | 0.05 | 1.011601 | 1.0233364 | 25.54849 | 0.018781 | 55.44 |
| 2047   | 2016 | -0.57 | 0.05 | 1.011601 | 1.0233364 | 22.89373 | 0.141863 | 21.51 |
| 2289   | 2016 | 0.414 | 0.05 | 1.011601 | 1.0233364 | 21.0502  | 0.044712 | 8.42  |
| 2243   | 2016 | -0.02 | 0.05 | 1.011601 | 1.0233364 | 21.31653 | 0.022429 | 51.52 |
| 300167 | 2016 | 0.36  | 0.05 | 1.011601 | 1.0233364 | 21.03489 | 0.037586 | 39.99 |
| 39     | 2016 | -0.44 | 0.05 | 1.011601 | 1.0233364 | 25.54849 | 0.018781 | 55.44 |
| 2781   | 2016 | 0.426 | 0.05 | 1.011601 | 1.0233364 | 22.00159 | 0.066662 | 42.3  |

|        |      |       |      |          |           |          |          |       |
|--------|------|-------|------|----------|-----------|----------|----------|-------|
| 19     | 2016 | 0.539 | 0.05 | 1.011601 | 1.0233364 | 20.88755 | 0.043202 | 19.09 |
| 300037 | 2016 | 1.007 | 0.05 | 1.011601 | 1.0233364 | 21.75186 | 0.119079 | 15.51 |
| 600380 | 2016 | 0.085 | 0.05 | 1.011601 | 1.0233364 | 23.50033 | 0.104385 | 46.78 |
| 2456   | 2016 | 0.052 | 0.05 | 1.011601 | 1.0233364 | 23.87746 | 0.089165 | 19.28 |
| 300197 | 2016 | -0.11 | 0.05 | 1.011601 | 1.0233364 | 23.16034 | 0.100676 | 40.74 |
| 300207 | 2016 | -0.08 | 0.05 | 1.011601 | 1.0233364 | 22.84299 | 0.189625 | 33.79 |
| 2161   | 2016 | 0.534 | 0.05 | 1.011601 | 1.0233364 | 21.48089 | 0.02323  | 24.39 |
| 39     | 2016 | 0.222 | 0.05 | 1.011601 | 1.0233364 | 25.54849 | 0.018781 | 55.44 |
| 300301 | 2016 | -0.2  | 0.05 | 1.011601 | 1.0233364 | 22.05661 | -0.00327 | 21.02 |
| 2475   | 2016 | -0.39 | 0.05 | 1.011601 | 1.0233364 | 23.76563 | 0.097451 | 50.06 |
| 300044 | 2016 | 0.523 | 0.05 | 1.011601 | 1.0233364 | 21.45423 | 0.113346 | 18.53 |
| 2482   | 2016 | -0.02 | 0.05 | 1.011601 | 1.0233364 | 23.32648 | 0.063532 | 38.18 |
| 2482   | 2016 | -0.1  | 0.05 | 1.011601 | 1.0233364 | 23.48614 | 0.063532 | 38.18 |
| 2482   | 2016 | -0.1  | 0.05 | 1.011601 | 1.0233364 | 23.48614 | 0.063532 | 38.18 |
| 2482   | 2016 | -0.33 | 0.05 | 1.011601 | 1.0233364 | 23.48614 | 0.063532 | 38.18 |
| 2482   | 2016 | 0.551 | 0.05 | 1.011601 | 1.0233364 | 23.48614 | 0.063532 | 38.18 |
| 39     | 2016 | -0.36 | 0.05 | 1.011601 | 1.0233364 | 25.54849 | 0.018781 | 55.44 |
| 603118 | 2016 | 0.129 | 0.05 | 1.011601 | 1.0233364 | 22.65879 | 0.079281 | 24.95 |
| 300012 | 2016 | 0.354 | 0.05 | 1.011601 | 1.0233364 | 21.7167  | 0.04517  | 13.81 |
| 2475   | 2016 | 0.017 | 0.05 | 1.011601 | 1.0233364 | 23.76563 | 0.097451 | 50.06 |
| 2475   | 2016 | -0.23 | 0.05 | 1.011601 | 1.0233364 | 23.76563 | 0.097451 | 50.06 |
| 300131 | 2016 | 0.14  | 0.05 | 1.011601 | 1.0233364 | 22.00885 | 0.107811 | 26.55 |
| 26     | 2016 | -0.68 | 0.05 | 1.011601 | 1.0233364 | 22.11078 | 0.046475 | 37.15 |
| 2138   | 2016 | 0.39  | 0.05 | 1.011601 | 1.0233364 | 22.11984 | 0.134333 | 11.74 |
| 2475   | 2016 | 0.053 | 0.05 | 1.011601 | 1.0233364 | 23.76563 | 0.097451 | 50.06 |
| 2369   | 2016 | -0.69 | 0.05 | 1.011601 | 1.0233364 | 21.69089 | 0.008909 | 16.33 |
| 300317 | 2016 | -0.26 | 0.05 | 1.011601 | 1.0233364 | 22.9325  | 0.074278 | 26.18 |
| 2106   | 2016 | 0.427 | 0.05 | 1.011601 | 1.0233364 | 22.25953 | 0.059913 | 20.84 |
| 2334   | 2016 | 0.963 | 0.05 | 1.011601 | 1.0233364 | 21.67227 | 0.038089 | 17.73 |
| 300044 | 2016 | 0.416 | 0.05 | 1.011601 | 1.0233364 | 21.45423 | 0.113346 | 18.53 |
| 2316   | 2016 | 0.955 | 0.05 | 1.011601 | 1.0233364 | 21.46274 | -0.00534 | 19.84 |
| 2238   | 2016 | -0.49 | 0.05 | 1.011601 | 1.0233364 | 22.05363 | 0.110719 | 57.77 |
| 66     | 2016 | 0.596 | 0.05 | 1.011601 | 1.0233364 | 24.43344 | 0.022581 | 53.92 |
| 39     | 2016 | -0.15 | 0.05 | 1.011601 | 1.0233364 | 25.54849 | 0.018781 | 55.44 |
| 2008   | 2016 | -0.06 | 0.05 | 1.011601 | 1.0233364 | 23.06213 | 0.135965 | 17.64 |
| 300311 | 2016 | 1.775 | 0.05 | 1.011601 | 1.0233364 | 21.30365 | 0.098449 | 39.46 |
| 2456   | 2016 | 0.011 | 0.05 | 1.011601 | 1.0233364 | 23.87746 | 0.089165 | 19.28 |
| 300303 | 2016 | 0.408 | 0.05 | 1.011601 | 1.0233364 | 21.69795 | 0.083451 | 22.94 |
| 300167 | 2016 | 0.36  | 0.05 | 1.011601 | 1.0233364 | 21.03489 | 0.037586 | 39.99 |
| 2456   | 2016 | -0.45 | 0.05 | 1.011601 | 1.0233364 | 23.87746 | 0.089165 | 19.28 |
| 2340   | 2016 | -0.18 | 0.05 | 1.011601 | 1.0233364 | 23.6715  | 0.041603 | 12.54 |
| 39     | 2016 | -0.36 | 0.05 | 1.011601 | 1.0233364 | 25.54849 | 0.018781 | 55.44 |
| 2313   | 2016 | 0.091 | 0.05 | 1.011601 | 1.0233364 | 22.0844  | 0.040307 | 19.69 |
| 39     | 2016 | 0.203 | 0.05 | 1.011601 | 1.0233364 | 25.54849 | 0.018781 | 55.44 |
| 2341   | 2016 | -0.63 | 0.05 | 1.011601 | 1.0233364 | 22.56267 | 0.014917 | 27.04 |
| 2301   | 2016 | -0.54 | 0.05 | 1.011601 | 1.0233364 | 22.05791 | 0.083717 | 49.41 |
| 300077 | 2016 | 2.238 | 0.05 | 1.011601 | 1.0233364 | 21.91542 | 0.03416  | 7.84  |
| 39     | 2016 | -0.75 | 0.05 | 1.011601 | 1.0233364 | 25.54849 | 0.018781 | 55.44 |
| 4      | 2016 | 0.034 | 0.05 | 1.011601 | 1.0233364 | 20.10336 | 0.222875 | 28.42 |
| 12     | 2016 | -0.79 | 0.05 | 1.011601 | 1.0233364 | 23.56508 | 0.098931 | 15.45 |
| 9      | 2016 | 0.595 | 0.05 | 1.011601 | 1.0233364 | 23.79702 | -0.02796 | 11.91 |
| 2456   | 2016 | 0.023 | 0.05 | 1.011601 | 1.0233364 | 23.87746 | 0.089165 | 19.28 |
| 39     | 2016 | -0.43 | 0.05 | 1.011601 | 1.0233364 | 25.54849 | 0.018781 | 55.44 |
| 39     | 2016 | -0.76 | 0.05 | 1.011601 | 1.0233364 | 25.54849 | 0.018781 | 55.44 |

|        |      |       |      |          |           |          |          |       |
|--------|------|-------|------|----------|-----------|----------|----------|-------|
| 2313   | 2016 | 0.028 | 0.05 | 1.011601 | 1.0233364 | 22.0844  | 0.040307 | 19.69 |
| 2340   | 2016 | 0.645 | 0.05 | 1.011601 | 1.0233364 | 23.6715  | 0.041603 | 12.54 |
| 69     | 2016 | -0.54 | 0.05 | 1.011601 | 1.0233364 | 25.70923 | 0.094797 | 53.47 |
| 2334   | 2016 | 0.401 | 0.05 | 1.011601 | 1.0233364 | 21.49862 | 0.038089 | 17.73 |
| 2191   | 2016 | 0.102 | 0.05 | 1.011601 | 1.0233364 | 22.62249 | 0.132569 | 32.73 |
| 555    | 2016 | 1.33  | 0.05 | 1.011601 | 1.0233364 | 22.97437 | 0.054547 | 40.43 |
| 39     | 2016 | -0.29 | 0.05 | 1.011601 | 1.0233364 | 25.54849 | 0.018781 | 55.44 |
| 300319 | 2016 | -0.13 | 0.05 | 1.011601 | 1.0233364 | 21.86227 | 0.068369 | 27.44 |
| 39     | 2016 | 0.203 | 0.05 | 1.011601 | 1.0233364 | 25.54849 | 0.018781 | 55.44 |
| 2436   | 2016 | 0.785 | 0.05 | 1.011601 | 1.0233364 | 22.17036 | 0.09118  | 17.77 |
| 16     | 2016 | -0.51 | 0.05 | 1.011601 | 1.0233364 | 23.57068 | 0.027776 | 21.75 |
| 39     | 2016 | 0.203 | 0.05 | 1.011601 | 1.0233364 | 25.54849 | 0.018781 | 55.44 |
| 2341   | 2016 | -0.63 | 0.05 | 1.011601 | 1.0233364 | 22.56267 | 0.014917 | 27.04 |
| 60     | 2016 | -0.14 | 0.05 | 1.011601 | 1.0233364 | 23.55466 | 0.069638 | 29.58 |
| 2436   | 2016 | 0.802 | 0.05 | 1.011601 | 1.0233364 | 22.17036 | 0.09118  | 17.77 |
| 300124 | 2016 | 0.304 | 0.05 | 1.011601 | 1.0233364 | 22.3219  | 0.196731 | 19.26 |
| 1979   | 2016 | -0.73 | 0.05 | 1.011601 | 1.0233364 | 25.74206 | 0.156592 | 66.1  |
| 2654   | 2016 | -0.36 | 0.05 | 1.011601 | 1.0233364 | 21.91507 | 0.066087 | 17.25 |
| 2436   | 2016 | 0.268 | 0.05 | 1.011601 | 1.0233364 | 21.7487  | 0.09118  | 17.77 |
| 2314   | 2016 | -0.91 | 0.05 | 1.011601 | 1.0233364 | 23.41221 | 0.092596 | 50.03 |
| 2402   | 2016 | -0.52 | 0.05 | 1.011601 | 1.0233364 | 21.19263 | 0.112704 | 17.88 |
| 300052 | 2016 | 1.025 | 0.05 | 1.011601 | 1.0233364 | 20.82295 | -0.06717 | 27.28 |
| 300232 | 2016 | -0.41 | 0.05 | 1.011601 | 1.0233364 | 21.68096 | 0.109479 | 43.28 |
| 2436   | 2016 | 0.149 | 0.05 | 1.011601 | 1.0233364 | 22.17036 | 0.09118  | 17.77 |
| 300311 | 2016 | 0.538 | 0.05 | 1.011601 | 1.0233364 | 21.30365 | 0.098449 | 39.46 |
| 2763   | 2016 | -0.39 | 0.05 | 1.011601 | 1.0233364 | 21.40523 | 0.11964  | 35.6  |
| 2672   | 2016 | -0.64 | 0.05 | 1.011601 | 1.0233364 | 22.82608 | 0.149297 | 22.56 |
| 2672   | 2016 | 0.02  | 0.05 | 1.011601 | 1.0233364 | 22.82608 | 0.149297 | 22.56 |
| 50     | 2016 | 0.347 | 0.05 | 1.011601 | 1.0233364 | 23.79963 | 0.041368 | 20.81 |
| 69     | 2016 | -0.98 | 0.05 | 1.011601 | 1.0233364 | 24.78843 | 0.094797 | 53.47 |
| 9      | 2016 | -0.2  | 0.05 | 1.011601 | 1.0233364 | 23.79702 | -0.02796 | 11.91 |
| 2340   | 2016 | 0.394 | 0.05 | 1.011601 | 1.0233364 | 23.6715  | 0.041603 | 12.54 |
| 2594   | 2016 | -0.02 | 0.05 | 1.011601 | 1.0233364 | 25.70049 | 0.0989   | 25.24 |
| 300389 | 2016 | -0.48 | 0.05 | 1.011601 | 1.0233364 | 21.22259 | 0.156125 | 25.51 |
| 2121   | 2016 | 0.101 | 0.05 | 1.011601 | 1.0233364 | 23.22664 | 0.099215 | 40.95 |
| 21     | 2016 | -0.43 | 0.05 | 1.011601 | 1.0233364 | 23.18434 | 0.078445 | 44.51 |
| 49     | 2016 | -0.41 | 0.05 | 1.011601 | 1.0233364 | 22.36145 | 0.233108 | 45.23 |
| 39     | 2016 | 0.203 | 0.05 | 1.011601 | 1.0233364 | 25.54849 | 0.018781 | 55.44 |
| 2351   | 2016 | -0.32 | 0.05 | 1.011601 | 1.0233364 | 21.38674 | 0.046333 | 31.7  |
| 300044 | 2016 | -0.01 | 0.05 | 1.011601 | 1.0233364 | 21.45423 | 0.113346 | 18.53 |
| 2475   | 2016 | -0.41 | 0.05 | 1.011601 | 1.0233364 | 23.76563 | 0.097451 | 50.06 |
| 300232 | 2016 | -0.2  | 0.05 | 1.011601 | 1.0233364 | 21.68096 | 0.109479 | 43.28 |
| 2456   | 2016 | -0.11 | 0.05 | 1.011601 | 1.0233364 | 23.87746 | 0.089165 | 19.28 |
| 2733   | 2016 | 0.643 | 0.05 | 1.011601 | 1.0233364 | 21.66658 | 0.054154 | 36.26 |
| 600525 | 2016 | 0.05  | 0.05 | 1.011601 | 1.0233364 | 22.92229 | 0.094461 | 7.84  |
| 90     | 2016 | -0.59 | 0.05 | 1.011601 | 1.0233364 | 23.68289 | 0.060213 | 23.47 |
| 2402   | 2016 | 0.263 | 0.05 | 1.011601 | 1.0233364 | 21.19263 | 0.112704 | 17.88 |
| 2402   | 2016 | -0.3  | 0.05 | 1.011601 | 1.0233364 | 21.19263 | 0.112704 | 17.88 |
| 300167 | 2016 | 0.36  | 0.05 | 1.011601 | 1.0233364 | 21.03489 | 0.037586 | 39.99 |
| 2399   | 2016 | 0.584 | 0.05 | 1.011601 | 1.0233364 | 23.28155 | 0.047736 | 38.01 |
| 2399   | 2016 | 0.584 | 0.05 | 1.011601 | 1.0233364 | 22.9964  | 0.047736 | 38.01 |
| 603118 | 2016 | 0.307 | 0.05 | 1.011601 | 1.0233364 | 22.65879 | 0.079281 | 24.95 |
| 2351   | 2016 | -0.32 | 0.05 | 1.011601 | 1.0233364 | 21.084   | 0.046333 | 31.7  |
| 2243   | 2016 | 0.381 | 0.05 | 1.011601 | 1.0233364 | 21.31653 | 0.022429 | 51.52 |

|        |      |       |      |          |           |          |          |       |
|--------|------|-------|------|----------|-----------|----------|----------|-------|
| 2618   | 2016 | 1.463 | 0.05 | 1.011601 | 1.0233364 | 21.58693 | 0.014728 | 30.18 |
| 2736   | 2016 | -0.94 | 0.05 | 1.011601 | 1.0233364 | 25.74206 | 0.09405  | 33.53 |
| 19     | 2016 | 0.539 | 0.05 | 1.011601 | 1.0233364 | 20.88755 | 0.043202 | 19.09 |
| 2736   | 2016 | -0.94 | 0.05 | 1.011601 | 1.0233364 | 25.74206 | 0.09405  | 33.53 |
| 21     | 2016 | -0.36 | 0.05 | 1.011601 | 1.0233364 | 23.18434 | 0.042237 | 44.51 |
| 2139   | 2016 | 0.308 | 0.05 | 1.011601 | 1.0233364 | 21.72216 | 0.083375 | 19.61 |
| 2551   | 2016 | -0.67 | 0.05 | 1.011601 | 1.0233364 | 22.124   | 0.062795 | 41.91 |
| 2388   | 2016 | -0.17 | 0.05 | 1.011601 | 1.0233364 | 20.95417 | 0.016977 | 48.09 |
| 2786   | 2016 | -0.33 | 0.05 | 1.011601 | 1.0233364 | 21.86134 | 0.097421 | 35.74 |
| 2215   | 2016 | -0.22 | 0.05 | 1.011601 | 1.0233364 | 21.87017 | -0.15868 | 27.56 |
| 45     | 2016 | -0.03 | 0.05 | 1.011601 | 1.0233364 | 22.13902 | -0.02537 | 46.21 |
| 2008   | 2016 | 0.334 | 0.05 | 1.011601 | 1.0233364 | 23.06213 | 0.135965 | 17.64 |
| 2388   | 2016 | -0.65 | 0.05 | 1.011601 | 1.0233364 | 20.95417 | 0.016977 | 48.09 |
| 16     | 2016 | 0.3   | 0.05 | 1.011601 | 1.0233364 | 23.57068 | 0.027776 | 21.75 |
| 2475   | 2016 | -0.25 | 0.05 | 1.011601 | 1.0233364 | 23.76563 | 0.097451 | 50.06 |
| 63     | 2016 | 0.813 | 0.05 | 1.011601 | 1.0233364 | 25.67656 | -0.19898 | 30.35 |
| 2369   | 2016 | -0.42 | 0.05 | 1.011601 | 1.0233364 | 21.69089 | 0.008909 | 16.33 |
| 2369   | 2016 | -0.45 | 0.05 | 1.011601 | 1.0233364 | 21.69089 | 0.008909 | 16.33 |
| 2369   | 2016 | -0.44 | 0.05 | 1.011601 | 1.0233364 | 21.69089 | 0.008909 | 16.33 |
| 21     | 2016 | -0.45 | 0.05 | 1.011601 | 1.0233364 | 23.18434 | 0.042237 | 44.51 |
| 300207 | 2016 | -0.6  | 0.05 | 1.011601 | 1.0233364 | 22.84299 | 0.189625 | 33.79 |
| 2528   | 2016 | 1.057 | 0.05 | 1.011601 | 1.0233364 | 22.12956 | -0.14593 | 30.73 |
| 300264 | 2016 | 1.328 | 0.05 | 1.011601 | 1.0233364 | 20.61357 | 0.010715 | 29.49 |
| 39     | 2016 | 0.203 | 0.05 | 1.011601 | 1.0233364 | 25.54849 | 0.018781 | 55.44 |
| 555    | 2016 | 1.33  | 0.05 | 1.011601 | 1.0233364 | 22.97437 | 0.054547 | 40.43 |
| 300124 | 2016 | 0.332 | 0.05 | 1.011601 | 1.0233364 | 22.3219  | 0.196731 | 19.26 |
| 300124 | 2016 | 0.304 | 0.05 | 1.011601 | 1.0233364 | 22.3219  | 0.196731 | 19.26 |
| 2340   | 2016 | 0.18  | 0.05 | 1.011601 | 1.0233364 | 23.6715  | 0.041603 | 12.54 |
| 2008   | 2016 | -0.06 | 0.05 | 1.011601 | 1.0233364 | 22.87481 | 0.135965 | 17.64 |
| 300112 | 2016 | 0.093 | 0.05 | 1.011601 | 1.0233364 | 20.66041 | 0.03708  | 21.72 |
| 2660   | 2016 | -0.37 | 0.05 | 1.011601 | 1.0233364 | 21.54469 | 0.013342 | 30.34 |
| 300269 | 2016 | 0.322 | 0.05 | 1.011601 | 1.0233364 | 22.7288  | 0.07484  | 18.8  |
| 70     | 2016 | 0.471 | 0.05 | 1.011601 | 1.0233364 | 22.34572 | 0.032292 | 39.18 |
| 2341   | 2016 | 0.42  | 0.05 | 1.011601 | 1.0233364 | 22.56267 | 0.014917 | 27.04 |
| 2577   | 2016 | -0.39 | 0.05 | 1.011601 | 1.0233364 | 20.99223 | 0.000995 | 62.29 |
| 39     | 2016 | 0.203 | 0.05 | 1.011601 | 1.0233364 | 25.54849 | 0.018781 | 55.44 |
| 2402   | 2016 | -0.3  | 0.05 | 1.011601 | 1.0233364 | 21.19263 | 0.112704 | 17.88 |
| 2456   | 2016 | -0.03 | 0.05 | 1.011601 | 1.0233364 | 23.87746 | 0.089165 | 19.28 |
| 2352   | 2016 | -0.26 | 0.05 | 1.011601 | 1.0233364 | 24.51139 | 0.202406 | 42.9  |
| 2352   | 2016 | -0.59 | 0.05 | 1.011601 | 1.0233364 | 24.51052 | 0.202406 | 42.9  |
| 2352   | 2016 | -0.29 | 0.05 | 1.011601 | 1.0233364 | 24.51052 | 0.202406 | 42.9  |
| 50     | 2016 | 0.347 | 0.05 | 1.011601 | 1.0233364 | 23.79963 | 0.041368 | 20.81 |
| 32     | 2016 | -0.77 | 0.05 | 1.011601 | 1.0233364 | 21.39387 | 0.029528 | 49.18 |
| 2421   | 2016 | -0.51 | 0.05 | 1.011601 | 1.0233364 | 21.98872 | 0.099328 | 20.77 |
| 600380 | 2016 | 0.771 | 0.05 | 1.011601 | 1.0233364 | 23.50033 | 0.104385 | 46.78 |
| 2341   | 2016 | -0.63 | 0.05 | 1.011601 | 1.0233364 | 22.56267 | 0.014917 | 27.04 |
| 300042 | 2016 | -0.55 | 0.05 | 1.011601 | 1.0233364 | 20.6448  | 0.050609 | 21.63 |
| 2436   | 2016 | 0.006 | 0.05 | 1.011601 | 1.0233364 | 22.17036 | 0.09118  | 17.77 |
| 9      | 2016 | -0.25 | 0.05 | 1.011601 | 1.0233364 | 23.79702 | -0.02796 | 11.91 |
| 300206 | 2016 | 1.384 | 0.05 | 1.011601 | 1.0233364 | 21.10676 | 0.01588  | 20.86 |
| 2340   | 2016 | -0.68 | 0.05 | 1.011601 | 1.0233364 | 23.6715  | 0.041603 | 12.54 |
| 66     | 2016 | 0.728 | 0.05 | 1.011601 | 1.0233364 | 24.43344 | 0.022581 | 53.92 |
| 2340   | 2016 | -0.32 | 0.05 | 1.011601 | 1.0233364 | 23.6715  | 0.041603 | 12.54 |
| 2763   | 2016 | -0.39 | 0.05 | 1.011601 | 1.0233364 | 21.40523 | 0.11964  | 35.6  |

|        |      |       |      |          |           |          |          |       |
|--------|------|-------|------|----------|-----------|----------|----------|-------|
| 2429   | 2016 | -0.19 | 0.05 | 1.011601 | 1.0233364 | 23.19201 | 0.045673 | 54.5  |
| 62     | 2016 | -0.23 | 0.05 | 1.011601 | 1.0233364 | 22.65806 | 0.066322 | 70.76 |
| 2055   | 2016 | -0.62 | 0.05 | 1.011601 | 1.0233364 | 22.67478 | -0.00771 | 31.03 |
| 300037 | 2016 | 0.835 | 0.05 | 1.011601 | 1.0233364 | 21.67135 | 0.119079 | 15.51 |
| 2289   | 2016 | 0.401 | 0.05 | 1.011601 | 1.0233364 | 21.0502  | 0.044712 | 8.42  |
| 2334   | 2016 | 0.401 | 0.05 | 1.011601 | 1.0233364 | 21.67227 | 0.038089 | 17.73 |
| 2334   | 2016 | 0.876 | 0.05 | 1.011601 | 1.0233364 | 21.67227 | 0.038089 | 17.73 |
| 2334   | 2016 | 0.963 | 0.05 | 1.011601 | 1.0233364 | 21.67227 | 0.038089 | 17.73 |
| 2594   | 2016 | -0.57 | 0.05 | 1.011601 | 1.0233364 | 25.70049 | 0.0989   | 25.24 |
| 2672   | 2016 | -0.64 | 0.05 | 1.011601 | 1.0233364 | 22.82608 | 0.149297 | 22.56 |
| 16     | 2016 | 0.045 | 0.05 | 1.011601 | 1.0233364 | 23.57068 | 0.027776 | 21.75 |
| 300134 | 2016 | -0.48 | 0.05 | 1.011601 | 1.0233364 | 22.77646 | 0.021913 | 43.39 |
| 16     | 2016 | -0.84 | 0.05 | 1.011601 | 1.0233364 | 23.57068 | 0.027776 | 21.75 |
| 2356   | 2016 | -0.15 | 0.05 | 1.011601 | 1.02E+00  | 22.28051 | 0.088833 | 49.28 |
| 2121   | 2016 | 0.295 | 0.05 | 1.011601 | 1.02E+00  | 22.96798 | 0.099215 | 40.95 |
| 66     | 2016 | 0.287 | 0.05 | 1.011601 | 1.02E+00  | 24.43344 | 0.022581 | 53.92 |
| 2583   | 2016 | 1.121 | 0.05 | 1.011601 | 1.02E+00  | 22.64138 | 0.084508 | 51.66 |
| 9      | 2016 | -0.73 | 0.05 | 1.011601 | 1.02E+00  | 23.79702 | -0.02796 | 11.91 |
| 2766   | 2016 | -0.12 | 0.05 | 1.011601 | 1.02E+00  | 21.30138 | -0.0713  | 48.49 |
| 2766   | 2016 | -0.12 | 0.05 | 1.011601 | 1.02E+00  | 21.34657 | -0.0713  | 48.49 |
| 2766   | 2016 | -0.12 | 0.05 | 1.011601 | 1.02E+00  | 21.30138 | -0.0713  | 48.49 |
| 2766   | 2016 | -0.12 | 0.05 | 1.011601 | 1.02E+00  | 21.30138 | -0.0713  | 48.49 |
| 999    | 2016 | 0.035 | 0.05 | 1.011601 | 1.02E+00  | 23.32978 | 0.138483 | 63.6  |
| 2548   | 2016 | 0.47  | 0.05 | 1.011601 | 1.02E+00  | 21.9494  | 0.089097 | 40.95 |
| 2170   | 2016 | 0.777 | 0.05 | 1.011601 | 1.0233364 | 22.15743 | 0.024766 | 27.07 |
| 2475   | 2016 | 0.079 | 0.05 | 1.011601 | 1.0233364 | 23.76563 | 0.097451 | 50.06 |
| 2340   | 2016 | -0.08 | 0.05 | 1.011601 | 1.0233364 | 23.6715  | 0.041603 | 12.54 |
| 9      | 2016 | 0.595 | 0.05 | 1.011601 | 1.0233364 | 23.79702 | -0.02796 | 11.91 |
| 2313   | 2016 | -0.42 | 0.05 | 1.011601 | 1.0233364 | 22.0844  | 0.040307 | 19.69 |
| 2660   | 2016 | -0.05 | 0.05 | 1.011601 | 1.0233364 | 21.54469 | 0.013342 | 30.34 |
| 300154 | 2016 | 0.284 | 0.05 | 1.011601 | 1.0233364 | 21.30185 | 0.044678 | 39.52 |
| 2130   | 2016 | -0.28 | 0.05 | 1.011601 | 1.0233364 | 22.22568 | 0.040041 | 24.64 |
| 2227   | 2016 | 1.138 | 0.05 | 1.011601 | 1.0233364 | 20.81015 | 0.011367 | 57.57 |
| 2314   | 2016 | -0.91 | 0.05 | 1.011601 | 1.0233364 | 23.41221 | 0.092596 | 50.03 |
| 300197 | 2016 | -0.47 | 0.05 | 1.011601 | 1.0233364 | 23.16034 | 0.100676 | 40.74 |
| 27     | 2016 | -0.92 | 0.05 | 1.011601 | 1.0233364 | 24.19158 | 0.056656 | 47.82 |
| 2587   | 2016 | 0.331 | 0.05 | 1.011601 | 1.0233364 | 20.95695 | 0.096996 | 28.36 |
| 16     | 2016 | -0.14 | 0.05 | 1.011601 | 1.0233364 | 23.57068 | 0.027776 | 21.75 |
| 2218   | 2016 | -0.19 | 0.05 | 1.011601 | 1.0233364 | 22.29269 | 0.047604 | 32.55 |
| 2313   | 2016 | 0.159 | 0.05 | 1.011601 | 1.0233364 | 22.0844  | 0.040307 | 19.69 |
| 27     | 2016 | -0.92 | 0.05 | 1.011601 | 1.0233364 | 24.83188 | 0.056656 | 47.82 |
| 16     | 2016 | -0.58 | 0.05 | 1.011601 | 1.0233364 | 23.47947 | 0.027776 | 21.75 |
| 39     | 2016 | -0.46 | 0.05 | 1.011601 | 1.0233364 | 25.54849 | 0.018781 | 55.44 |
| 2548   | 2016 | 0.47  | 0.05 | 1.011601 | 1.0233364 | 21.67038 | 0.089097 | 40.95 |
| 2781   | 2016 | 0.426 | 0.05 | 1.011601 | 1.0233364 | 21.93784 | 0.066662 | 42.3  |
| 300319 | 2016 | -0.7  | 0.05 | 1.011601 | 1.0233364 | 21.86227 | 0.068369 | 27.44 |
| 2782   | 2016 | -0.79 | 0.05 | 1.011601 | 1.0233364 | 20.75777 | 0.07204  | 35.56 |
| 9      | 2016 | 0.457 | 0.05 | 1.011601 | 1.0233364 | 23.79702 | -0.02796 | 11.91 |
| 2672   | 2016 | -0.64 | 0.05 | 1.011601 | 1.0233364 | 22.82608 | 0.149297 | 22.56 |
| 2548   | 2016 | 0.47  | 0.05 | 1.011601 | 1.0233364 | 21.9494  | 0.089097 | 40.95 |
| 63     | 2016 | 1.16  | 0.05 | 1.011601 | 1.0233364 | 25.67656 | -0.19898 | 30.35 |
| 2351   | 2016 | 0.058 | 0.05 | 1.011601 | 1.0233364 | 21.38674 | 0.046333 | 31.7  |
| 300077 | 2016 | 2.238 | 0.05 | 1.011601 | 1.0233364 | 21.91542 | 0.03416  | 7.84  |
| 2763   | 2016 | -0.39 | 0.05 | 1.011601 | 1.0233364 | 21.40523 | 0.11964  | 35.6  |

|        |      |       |      |          |           |          |          |       |
|--------|------|-------|------|----------|-----------|----------|----------|-------|
| 2587   | 2016 | 0.245 | 0.05 | 1.011601 | 1.0233364 | 20.95695 | 0.096996 | 28.36 |
| 2218   | 2016 | -0.41 | 0.05 | 1.011601 | 1.0233364 | 22.29269 | 0.047604 | 32.55 |
| 39     | 2016 | -0.55 | 0.05 | 1.011601 | 1.0233364 | 25.54849 | 0.018781 | 55.44 |
| 2301   | 2016 | -0.54 | 0.05 | 1.011601 | 1.0233364 | 22.05791 | 0.083717 | 49.41 |
| 39     | 2016 | 0.203 | 0.05 | 1.011601 | 1.0233364 | 25.54849 | 0.130375 | 55.44 |
| 2672   | 2016 | -0.34 | 0.05 | 1.011601 | 1.0233364 | 22.82608 | 0.149297 | 22.56 |
| 300389 | 2016 | 0.145 | 0.05 | 1.011601 | 1.0233364 | 21.22259 | 0.156125 | 25.51 |
| 63     | 2016 | 1.522 | 0.05 | 1.011601 | 1.0233364 | 25.67656 | -0.19898 | 30.35 |
| 2215   | 2016 | 0.658 | 0.05 | 1.011601 | 1.0233364 | 21.93923 | -0.15868 | 27.56 |
| 68     | 2016 | 0.574 | 0.05 | 1.011601 | 1.0233364 | 20.62074 | -0.05449 | 26.43 |
| 63     | 2016 | 1.156 | 0.05 | 1.011601 | 1.0233364 | 25.67656 | -0.19898 | 30.35 |
| 2121   | 2016 | 0.804 | 0.05 | 1.011601 | 1.0233364 | 23.22664 | 0.099215 | 40.95 |
| 2161   | 2016 | 0.632 | 0.05 | 1.011601 | 1.0233364 | 21.48089 | 0.02323  | 24.39 |
| 300052 | 2016 | 1.025 | 0.05 | 1.011601 | 1.0233364 | 20.82295 | -0.06717 | 27.28 |
| 2139   | 2016 | 0.101 | 0.05 | 1.011601 | 1.0233364 | 21.72216 | 0.083375 | 19.61 |
| 2008   | 2016 | -0.06 | 0.05 | 1.011601 | 1.0233364 | 23.06213 | 0.135965 | 17.64 |
| 2313   | 2016 | -0.09 | 0.05 | 1.011601 | 1.0233364 | 22.0844  | 0.040307 | 19.69 |
| 50     | 2016 | 0.334 | 0.05 | 1.011601 | 1.0233364 | 23.79963 | 0.041368 | 20.81 |
| 2402   | 2016 | 0.459 | 0.05 | 1.011601 | 1.0233364 | 21.19263 | 0.112704 | 17.88 |
| 600380 | 2016 | 0.771 | 0.05 | 1.011601 | 1.0233364 | 23.50033 | 0.104385 | 46.78 |
| 60     | 2016 | -0.8  | 0.05 | 1.011601 | 1.0233364 | 23.55466 | 0.069638 | 29.58 |
| 2609   | 2016 | 0.378 | 0.05 | 1.011601 | 1.0233364 | 21.62001 | 0.087596 | 35.42 |
| 9      | 2016 | -0.73 | 0.05 | 1.011601 | 1.0233364 | 23.79702 | 0.051567 | 11.91 |
| 60     | 2016 | -0.15 | 0.05 | 1.011601 | 1.0233364 | 23.55466 | 0.069638 | 29.58 |
| 60     | 2016 | -0.14 | 0.05 | 1.011601 | 1.0233364 | 23.55466 | 0.069638 | 29.58 |
| 300311 | 2016 | 1.775 | 0.05 | 1.011601 | 1.0233364 | 21.30365 | 0.098449 | 39.46 |
| 300047 | 2016 | 1.299 | 0.05 | 1.011601 | 1.0233364 | 21.76592 | 0.066081 | 13.01 |
| 300047 | 2016 | 1.299 | 0.05 | 1.011601 | 1.0233364 | 21.76592 | 0.066081 | 13.01 |
| 63     | 2016 | 0.26  | 0.05 | 1.011601 | 1.0233364 | 25.67656 | -0.19898 | 30.35 |
| 55     | 2016 | -0.54 | 0.05 | 1.011601 | 1.0233364 | 22.63828 | 0.187623 | 8.72  |
| 300044 | 2016 | 0.946 | 0.05 | 1.011601 | 1.0233364 | 21.45423 | 0.113346 | 18.53 |
| 300042 | 2016 | -0.55 | 0.05 | 1.011601 | 1.0233364 | 20.63459 | 0.050609 | 21.63 |
| 50     | 2016 | 0.658 | 0.05 | 1.011601 | 1.0233364 | 23.79963 | 0.041368 | 20.81 |
| 26     | 2016 | -0.74 | 0.05 | 1.011601 | 1.0233364 | 22.11078 | 0.046475 | 37.15 |
| 2191   | 2016 | -0.54 | 0.05 | 1.011601 | 1.0233364 | 22.62249 | 0.132569 | 32.73 |
| 39     | 2016 | 0.203 | 0.05 | 1.011601 | 1.0233364 | 25.54849 | 0.018781 | 55.44 |
| 2334   | 2016 | 0.963 | 0.05 | 1.011601 | 1.0233364 | 21.67227 | 0.038089 | 17.73 |
| 2334   | 2016 | 0.963 | 0.05 | 1.011601 | 1.0233364 | 21.67227 | 0.038089 | 17.73 |
| 49     | 2016 | -0.05 | 0.05 | 1.011601 | 1.0233364 | 22.36145 | 0.249156 | 45.23 |
| 63     | 2016 | 1.16  | 0.05 | 1.011601 | 1.0233364 | 25.67656 | -0.19898 | 30.35 |
| 2724   | 2016 | 0.781 | 0.05 | 1.011601 | 1.0233364 | 21.35706 | 0.068194 | 70.42 |
| 49     | 2016 | -0.2  | 0.05 | 1.011601 | 1.0233364 | 22.36145 | 0.233108 | 45.23 |
| 2055   | 2016 | -0.39 | 0.05 | 1.011601 | 1.0233364 | 22.67478 | -0.00771 | 31.03 |
| 300319 | 2016 | 0.244 | 0.05 | 1.011601 | 1.0233364 | 21.59619 | 0.068369 | 27.44 |
| 9      | 2016 | 0.595 | 0.05 | 1.011601 | 1.0233364 | 23.79702 | -0.02796 | 11.91 |
| 2475   | 2016 | 0.079 | 0.05 | 1.011601 | 1.0233364 | 23.76563 | 0.097451 | 50.06 |
| 2314   | 2016 | -0.91 | 0.05 | 1.011601 | 1.0233364 | 22.82864 | 0.092596 | 50.03 |
| 69     | 2016 | -0.83 | 0.05 | 1.011601 | 1.0233364 | 25.70923 | 0.094797 | 53.47 |
| 2399   | 2016 | 0.584 | 0.05 | 1.011601 | 1.02E+00  | 23.28155 | 0.047736 | 38.01 |
| 78     | 2016 | 0.39  | 0.05 | 1.011601 | 1.02E+00  | 23.53636 | -0.00907 | 45.93 |
| 2121   | 2016 | 1.334 | 0.05 | 1.011601 | 1.02E+00  | 23.22664 | 0.099215 | 40.95 |
| 300317 | 2016 | -0.09 | 0.05 | 1.011601 | 1.02E+00  | 22.41245 | 0.074278 | 26.18 |
| 2121   | 2016 | 0.341 | 0.05 | 1.011601 | 1.02E+00  | 23.22664 | 0.099215 | 40.95 |
| 39     | 2016 | -0.36 | 0.05 | 1.011601 | 1.02E+00  | 25.54849 | 0.018781 | 55.44 |



|        |      |       |      |          |           |          |          |       |
|--------|------|-------|------|----------|-----------|----------|----------|-------|
| 300037 | 2016 | 1.007 | 0.05 | 1.011601 | 1.02E+00  | 21.75186 | 0.119079 | 15.51 |
| 69     | 2016 | -0.54 | 0.05 | 1.011601 | 1.02E+00  | 25.70923 | 0.094797 | 53.47 |
| 39     | 2016 | 0.032 | 0.05 | 1.011601 | 1.02E+00  | 25.54849 | 0.018781 | 55.44 |
| 300115 | 2016 | 0.368 | 0.05 | 1.011601 | 1.02E+00  | 22.82527 | 0.167006 | 47.19 |
| 2170   | 2016 | 0.777 | 0.05 | 1.011601 | 1.02E+00  | 22.15743 | 0.024766 | 27.07 |
| 300197 | 2016 | -0.3  | 0.05 | 1.011601 | 1.0233364 | 23.08348 | 0.100676 | 40.74 |
| 39     | 2016 | 0.203 | 0.05 | 1.011601 | 1.0233364 | 25.54849 | 0.018781 | 55.44 |
| 2215   | 2016 | -0.22 | 0.05 | 1.011601 | 1.0233364 | 21.87017 | -0.15868 | 27.56 |
| 2594   | 2016 | -0.43 | 0.05 | 1.011601 | 1.0233364 | 25.70049 | 0.0989   | 25.24 |
| 19     | 2016 | 0.539 | 0.05 | 1.011601 | 1.0233364 | 20.88755 | 0.043202 | 19.09 |
| 2421   | 2016 | -0.51 | 0.05 | 1.011601 | 1.0233364 | 22.29824 | 0.099328 | 20.77 |
| 2399   | 2016 | 0.584 | 0.05 | 1.011601 | 1.0233364 | 23.28155 | 0.047736 | 38.01 |
| 50     | 2016 | 0.347 | 0.05 | 1.011601 | 1.0233364 | 23.68215 | 0.041368 | 20.81 |
| 2137   | 2016 | -0.76 | 0.05 | 1.011601 | 1.0233364 | 21.36708 | 0.093442 | 38.18 |
| 60     | 2016 | -0.14 | 0.05 | 1.011601 | 1.0233364 | 23.2271  | 0.069638 | 29.58 |
| 39     | 2016 | -0.18 | 0.05 | 1.011601 | 1.0233364 | 25.54849 | 0.018781 | 55.44 |
| 2618   | 2016 | 1.291 | 0.05 | 1.011601 | 1.0233364 | 21.58693 | 0.014728 | 30.18 |
| 2351   | 2016 | 0.058 | 0.05 | 1.011601 | 1.0233364 | 21.38674 | 0.046333 | 31.7  |
| 2130   | 2016 | -0.28 | 0.05 | 1.011601 | 1.0233364 | 22.4023  | 0.040041 | 24.64 |
| 39     | 2016 | -0.63 | 0.05 | 1.011601 | 1.0233364 | 25.54849 | 0.018781 | 55.44 |
| 2130   | 2016 | 0.35  | 0.05 | 1.011601 | 1.0233364 | 22.4023  | 0.040041 | 24.64 |
| 2130   | 2016 | -0.25 | 0.05 | 1.011601 | 1.0233364 | 22.4023  | 0.040041 | 24.64 |
| 300136 | 2016 | 0.022 | 0.05 | 1.011601 | 1.0233364 | 21.87485 | 0.268381 | 23.88 |
| 2191   | 2016 | -0.25 | 0.05 | 1.011601 | 1.0233364 | 22.62249 | 0.132569 | 32.73 |
| 2482   | 2016 | 0.056 | 0.05 | 1.011601 | 1.0233364 | 23.48614 | 0.063532 | 38.18 |
| 300319 | 2016 | -0.31 | 0.05 | 1.011601 | 1.0233364 | 21.86227 | 0.068369 | 27.44 |
| 300193 | 2016 | 0.006 | 0.05 | 1.011601 | 1.0233364 | 21.63289 | 0.048537 | 19.66 |
| 60     | 2016 | -0.25 | 0.05 | 1.011601 | 1.0233364 | 23.55466 | 0.069638 | 29.58 |
| 555    | 2016 | 0.853 | 0.05 | 1.011601 | 1.0233364 | 22.97437 | 0.054547 | 40.43 |
| 300136 | 2016 | 0.172 | 0.05 | 1.011601 | 1.0233364 | 21.87485 | 0.268381 | 23.88 |
| 39     | 2016 | 0.203 | 0.05 | 1.011601 | 1.0233364 | 25.54849 | 0.018781 | 55.44 |
| 300207 | 2016 | -0.19 | 0.05 | 1.011601 | 1.0233364 | 22.84299 | 0.189625 | 33.79 |
| 9      | 2016 | 0.595 | 0.05 | 1.011601 | 1.0233364 | 23.79702 | -0.02796 | 11.91 |
| 2340   | 2016 | 0.18  | 0.05 | 1.011601 | 1.0233364 | 23.6715  | 0.041603 | 12.54 |
| 2139   | 2016 | 0.118 | 0.05 | 1.011601 | 1.0233364 | 21.64204 | 0.083375 | 19.61 |
| 60     | 2016 | -0.8  | 0.05 | 1.011601 | 1.0233364 | 23.55466 | 0.069638 | 29.58 |
| 2139   | 2016 | 0.931 | 0.05 | 1.011601 | 1.0233364 | 21.72216 | 0.083375 | 19.61 |
| 66     | 2016 | -0.6  | 0.05 | 1.011601 | 1.0233364 | 24.43344 | 0.022581 | 53.92 |
| 66     | 2016 | 0.287 | 0.05 | 1.011601 | 1.0233364 | 22.3538  | 0.022581 | 53.92 |
| 60     | 2016 | 0.52  | 0.05 | 1.011601 | 1.0233364 | 23.55466 | 0.041615 | 29.58 |
| 32     | 2016 | -0.77 | 0.05 | 1.011601 | 1.0233364 | 21.39387 | 0.029528 | 49.18 |
| 63     | 2016 | 1.585 | 0.05 | 1.011601 | 1.0233364 | 25.67656 | -0.19898 | 30.35 |
| 2399   | 2016 | 0.584 | 0.05 | 1.011601 | 1.0233364 | 23.28155 | 0.047736 | 38.01 |
| 2351   | 2016 | -0.32 | 0.05 | 1.011601 | 1.0233364 | 21.38674 | 0.046333 | 31.7  |
| 55     | 2016 | 0.097 | 0.05 | 1.011601 | 1.0233364 | 22.63828 | 0.284927 | 8.72  |
| 9      | 2016 | 0.595 | 0.05 | 1.011601 | 1.0233364 | 23.79702 | -0.02796 | 11.91 |
| 2055   | 2016 | 0.07  | 0.05 | 1.011601 | 1.0233364 | 22.67478 | -0.00771 | 31.03 |
| 9      | 2016 | -0.15 | 0.05 | 1.011601 | 1.0233364 | 23.79702 | -0.02796 | 11.91 |
| 2052   | 2016 | 0.767 | 0.05 | 1.011601 | 1.0233364 | 21.36908 | -0.4336  | 16.5  |
| 2052   | 2016 | 0.767 | 0.05 | 1.011601 | 1.0233364 | 21.36908 | -0.4336  | 16.5  |
| 28     | 2016 | 0.47  | 0.05 | 1.011601 | 1.0233364 | 23.78257 | 0.081732 | 51    |
| 2786   | 2016 | -0.67 | 0.05 | 1.011601 | 1.0233364 | 21.86134 | 0.097421 | 35.74 |
| 28     | 2016 | 0.556 | 0.05 | 1.011601 | 1.0233364 | 23.78257 | 0.081732 | 51    |
| 300207 | 2016 | 0.002 | 0.05 | 1.011601 | 1.0233364 | 22.84299 | 0.189625 | 33.79 |

|        |      |       |      |          |           |          |          |       |
|--------|------|-------|------|----------|-----------|----------|----------|-------|
| 69     | 2016 | -0.54 | 0.05 | 1.011601 | 1.0233364 | 25.70923 | 0.094797 | 53.47 |
| 999    | 2016 | -0.81 | 0.05 | 1.011601 | 1.0233364 | 23.32978 | 0.138483 | 63.6  |
| 39     | 2016 | 0.045 | 0.05 | 1.011601 | 1.0233364 | 25.54849 | 0.018781 | 55.44 |
| 2215   | 2016 | -0.22 | 0.05 | 1.011601 | 1.0233364 | 21.87017 | -0.15868 | 27.56 |
| 28     | 2016 | 0.507 | 0.05 | 1.011601 | 1.0233364 | 23.78257 | 0.081732 | 51    |
| 2594   | 2016 | -0.57 | 0.05 | 1.011601 | 1.0233364 | 25.70049 | 0.0989   | 25.24 |
| 300235 | 2016 | 2.296 | 0.05 | 1.011601 | 1.0233364 | 20.10336 | 0.050475 | 22.65 |
| 19     | 2016 | 0.539 | 0.05 | 1.011601 | 1.0233364 | 21.16849 | 0.043202 | 19.09 |
| 2047   | 2016 | -0.42 | 0.05 | 1.011601 | 1.0233364 | 22.89373 | 0.141863 | 21.51 |
| 2313   | 2016 | -0.42 | 0.05 | 1.011601 | 1.0233364 | 21.5499  | 0.040307 | 19.69 |
| 27     | 2016 | -0.92 | 0.05 | 1.011601 | 1.0233364 | 24.83188 | 0.048888 | 47.82 |
| 27     | 2016 | -0.92 | 0.05 | 1.011601 | 1.0233364 | 24.19158 | 0.056656 | 47.82 |
| 2163   | 2016 | 0.02  | 0.05 | 1.011601 | 1.0233364 | 22.63495 | -0.06801 | 13.74 |
| 2352   | 2016 | 0.399 | 0.05 | 1.011601 | 1.0233364 | 24.51052 | 0.202406 | 42.9  |
| 2161   | 2016 | 1.565 | 0.05 | 1.011601 | 1.0233364 | 21.48089 | 0.02323  | 24.39 |
| 2161   | 2016 | 0.534 | 0.05 | 1.011601 | 1.0233364 | 21.48089 | 0.02323  | 24.39 |
| 39     | 2016 | -0.26 | 0.05 | 1.011601 | 1.0233364 | 25.54849 | 0.018781 | 55.44 |
| 2163   | 2016 | 0.099 | 0.05 | 1.011601 | 1.0233364 | 22.63495 | -0.06801 | 13.74 |
| 2130   | 2016 | -0.16 | 0.05 | 1.011601 | 1.0233364 | 22.4023  | 0.040041 | 24.64 |
| 300012 | 2016 | 0.36  | 0.05 | 1.011601 | 1.0233364 | 21.86193 | 0.04517  | 13.81 |
| 2594   | 2016 | 0.309 | 0.05 | 1.011601 | 1.0233364 | 25.70049 | 0.0989   | 25.24 |
| 300077 | 2016 | 2.238 | 0.05 | 1.011601 | 1.0233364 | 21.90347 | 0.03416  | 7.84  |
| 19     | 2016 | 0.539 | 0.05 | 1.011601 | 1.0233364 | 20.88755 | 0.043202 | 19.09 |
| 2577   | 2016 | -0.17 | 0.05 | 1.011601 | 1.0233364 | 20.99223 | 0.000995 | 62.29 |
| 2105   | 2016 | -0.53 | 0.05 | 1.011601 | 1.0233364 | 21.05476 | 0.027483 | 41.93 |
| 2168   | 2016 | -0.33 | 0.05 | 1.011601 | 1.0233364 | 21.43734 | 0.056051 | 9.96  |
| 9      | 2016 | 0.595 | 0.05 | 1.011601 | 1.0233364 | 23.79702 | -0.02796 | 11.91 |
| 62     | 2016 | -0.23 | 0.05 | 1.011601 | 1.0233364 | 22.65806 | 0.10774  | 70.76 |
| 12     | 2016 | -0.79 | 0.05 | 1.011601 | 1.0233364 | 23.56508 | 0.098931 | 15.45 |
| 2170   | 2016 | -0.4  | 0.05 | 1.011601 | 1.0233364 | 22.18727 | 0.024766 | 27.07 |
| 2518   | 2016 | -0.51 | 0.05 | 1.011601 | 1.0233364 | 21.76063 | 0.15033  | 60.1  |
| 300052 | 2016 | 1.663 | 0.05 | 1.011601 | 1.0233364 | 20.82295 | -0.06717 | 27.28 |
| 600380 | 2016 | 0.771 | 0.05 | 1.011601 | 1.0233364 | 23.50033 | 0.104385 | 46.78 |
| 2356   | 2016 | -0.09 | 0.05 | 1.011601 | 1.0233364 | 22.28051 | 0.088833 | 49.28 |
| 2170   | 2016 | 0.28  | 0.05 | 1.011601 | 1.0233364 | 22.15743 | 0.024766 | 27.07 |
| 2170   | 2016 | 0.573 | 0.05 | 1.011601 | 1.0233364 | 22.15743 | 0.024766 | 27.07 |
| 2121   | 2016 | 1.334 | 0.05 | 1.011601 | 1.0233364 | 23.22664 | 0.099215 | 40.95 |
| 2456   | 2016 | 0.112 | 0.05 | 1.011601 | 1.0233364 | 23.87746 | 0.089165 | 19.28 |
| 2340   | 2016 | -0.36 | 0.05 | 1.011601 | 1.0233364 | 23.6715  | 0.041603 | 12.54 |
| 2340   | 2016 | -0.68 | 0.05 | 1.011601 | 1.0233364 | 23.6715  | 0.041603 | 12.54 |
| 2660   | 2016 | 0.688 | 0.05 | 1.011601 | 1.0233364 | 21.54469 | 0.013342 | 30.34 |
| 2130   | 2016 | -0.28 | 0.05 | 1.011601 | 1.0233364 | 22.4023  | 0.040041 | 24.64 |
| 39     | 2016 | -0.84 | 0.05 | 1.011601 | 1.0233364 | 25.54849 | 0.018781 | 55.44 |
| 2402   | 2016 | -0.52 | 0.05 | 1.011601 | 1.0233364 | 21.19263 | 0.112704 | 17.88 |
| 2163   | 2016 | 0.443 | 0.05 | 1.011601 | 1.0233364 | 22.63495 | -0.06801 | 13.74 |
| 300124 | 2016 | 0.667 | 0.05 | 1.011601 | 1.0233364 | 22.3219  | 0.196731 | 19.26 |
| 300232 | 2016 | -0.54 | 0.05 | 1.011601 | 1.0233364 | 21.68096 | 0.109479 | 43.28 |
| 28     | 2016 | 0.507 | 0.05 | 1.011601 | 1.0233364 | 23.00281 | 0.143806 | 51    |
| 12     | 2016 | -0.05 | 0.05 | 1.011601 | 1.0233364 | 23.13516 | 0.098931 | 15.45 |
| 2215   | 2016 | -0.22 | 0.05 | 1.011601 | 1.0233364 | 21.87017 | -0.15868 | 27.56 |
| 2215   | 2016 | 0.327 | 0.05 | 1.011601 | 1.0233364 | 21.87017 | -0.15868 | 27.56 |
| 300162 | 2016 | 0.218 | 0.05 | 1.011601 | 1.0233364 | 21.10548 | 0.026709 | 22.53 |
| 12     | 2016 | -0.42 | 0.05 | 1.011601 | 1.0233364 | 23.56508 | 0.098931 | 15.45 |
| 69     | 2016 | -0.54 | 0.05 | 1.011601 | 1.0233364 | 25.70923 | 0.094797 | 53.47 |

|        |      |       |      |          |           |          |          |       |
|--------|------|-------|------|----------|-----------|----------|----------|-------|
| 26     | 2016 | -0.7  | 0.05 | 1.011601 | 1.0233364 | 22.11078 | 0.046475 | 37.15 |
| 2314   | 2016 | -0.91 | 0.05 | 1.011601 | 1.0233364 | 23.41221 | 0.092596 | 50.03 |
| 9      | 2016 | 0.006 | 0.05 | 1.011601 | 1.0233364 | 23.79702 | -0.02796 | 11.91 |
| 2402   | 2016 | 0.263 | 0.05 | 1.011601 | 1.0233364 | 21.19263 | 0.112704 | 17.88 |
| 2191   | 2016 | -0.26 | 0.05 | 1.011601 | 1.0233364 | 22.62249 | 0.132569 | 32.73 |
| 55     | 2016 | -0.54 | 0.05 | 1.011601 | 1.0233364 | 22.63828 | 0.187623 | 8.72  |
| 300130 | 2016 | 0.192 | 0.05 | 1.011601 | 1.0233364 | 21.75173 | 0.097748 | 32.55 |
| 2587   | 2016 | 0.078 | 0.05 | 1.011601 | 1.0233364 | 20.95695 | 0.096996 | 28.36 |
| 2121   | 2016 | 0.451 | 0.05 | 1.011601 | 1.0233364 | 23.22664 | 0.099215 | 40.95 |
| 26     | 2016 | -0.74 | 0.05 | 1.011601 | 1.0233364 | 22.11078 | 0.046475 | 37.15 |
| 300154 | 2016 | 0.284 | 0.05 | 1.011601 | 1.0233364 | 21.30185 | 0.044678 | 39.52 |
| 78     | 2016 | 0.39  | 0.05 | 1.011601 | 1.0233364 | 23.53636 | 0.084867 | 45.93 |
| 12     | 2016 | -0.46 | 0.05 | 1.011601 | 1.0233364 | 23.56508 | 0.098931 | 15.45 |
| 66     | 2016 | 0.287 | 0.05 | 1.011601 | 1.0233364 | 24.43344 | 0.022581 | 53.92 |
| 300130 | 2016 | 0.666 | 0.05 | 1.011601 | 1.0233364 | 21.75173 | 0.097748 | 32.55 |
| 78     | 2016 | 0.39  | 0.05 | 1.011601 | 1.0233364 | 23.53636 | 0.084867 | 45.93 |
| 300085 | 2016 | 0.796 | 0.05 | 1.011601 | 1.0233364 | 21.12303 | 0.09432  | 19.61 |
| 300400 | 2016 | -0.13 | 0.05 | 1.011601 | 1.0233364 | 20.17587 | 0.121419 | 34.05 |
| 90     | 2016 | -0.59 | 0.05 | 1.011601 | 1.0233364 | 22.98828 | 0.070418 | 23.47 |
| 12     | 2016 | -0.13 | 0.05 | 1.011601 | 1.0233364 | 23.56508 | 0.098931 | 15.45 |
| 2352   | 2016 | -0.29 | 0.05 | 1.011601 | 1.0233364 | 24.51052 | 0.202406 | 42.9  |
| 300037 | 2016 | 1.007 | 0.05 | 1.011601 | 1.0233364 | 21.75186 | 0.119079 | 15.51 |
| 2660   | 2016 | 0.688 | 0.05 | 1.011601 | 1.0233364 | 21.54469 | 0.013342 | 30.34 |
| 2238   | 2016 | -0.49 | 0.05 | 1.011601 | 1.0233364 | 22.05363 | 0.110719 | 57.77 |
| 2359   | 2016 | -0.59 | 0.05 | 1.011601 | 1.0233364 | 21.22251 | -0.05424 | 31.87 |
| 2402   | 2016 | -0.52 | 0.05 | 1.011601 | 1.0233364 | 21.19263 | 0.112704 | 17.88 |
| 2429   | 2016 | 0.532 | 0.05 | 1.011601 | 1.0233364 | 23.23253 | 0.045673 | 54.5  |
| 2775   | 2016 | -0.33 | 0.05 | 1.011601 | 1.0233364 | 21.50607 | 0.119414 | 20.65 |
| 2421   | 2016 | 0.605 | 0.05 | 1.011601 | 1.0233364 | 22.29824 | 0.099328 | 20.77 |
| 2681   | 2016 | -0.05 | 0.05 | 1.011601 | 1.0233364 | 22.14544 | 0.136136 | 44.54 |
| 63     | 2016 | 1.16  | 0.05 | 1.011601 | 1.0233364 | 25.67656 | -0.19898 | 30.35 |
| 66     | 2016 | -0.22 | 0.05 | 1.011601 | 1.0233364 | 24.43344 | 0.022581 | 53.92 |
| 9      | 2016 | -0.07 | 0.05 | 1.011601 | 1.0233364 | 23.79702 | -0.02796 | 11.91 |
| 2456   | 2016 | 0.031 | 0.05 | 1.011601 | 1.0233364 | 23.09834 | 0.089165 | 19.28 |
| 9      | 2016 | 0.595 | 0.05 | 1.011601 | 1.0233364 | 23.79702 | -0.02796 | 11.91 |
| 300303 | 2016 | 0.14  | 0.05 | 1.011601 | 1.0233364 | 21.78851 | 0.083451 | 22.94 |
| 600380 | 2016 | 0.771 | 0.05 | 1.011601 | 1.0233364 | 23.50033 | 0.104385 | 46.78 |
| 2215   | 2016 | -0.22 | 0.05 | 1.011601 | 1.0233364 | 21.87017 | -0.15868 | 27.56 |
| 39     | 2016 | -0.31 | 0.05 | 1.011601 | 1.0233364 | 25.54849 | 0.018781 | 55.44 |
| 2243   | 2016 | 0.783 | 0.05 | 1.011601 | 1.0233364 | 21.31653 | 0.022429 | 51.52 |
| 2243   | 2016 | -0.54 | 0.05 | 1.011601 | 1.0233364 | 21.31653 | 0.022429 | 51.52 |
| 300252 | 2016 | -0.57 | 0.05 | 1.011601 | 1.0233364 | 22.12533 | 0.096123 | 34.12 |
| 300136 | 2016 | 0.42  | 0.05 | 1.011601 | 1.0233364 | 21.87485 | 0.268381 | 23.88 |
| 300112 | 2016 | -0.2  | 0.05 | 1.011601 | 1.0233364 | 20.36578 | 0.03708  | 21.72 |
| 2303   | 2016 | -0.33 | 0.05 | 1.011601 | 1.0233364 | 22.12931 | 0.054002 | 42.44 |
| 63     | 2016 | 1.16  | 0.05 | 1.011601 | 1.0233364 | 25.67656 | -0.19898 | 30.35 |
| 300167 | 2016 | 1.444 | 0.05 | 1.011601 | 1.0233364 | 21.03489 | 0.037586 | 39.99 |
| 2751   | 2016 | 0.368 | 0.05 | 1.011601 | 1.0233364 | 21.3069  | -0.03011 | 28.41 |
| 2289   | 2016 | 0.414 | 0.05 | 1.011601 | 1.0233364 | 21.0502  | 0.044712 | 8.42  |
| 300112 | 2016 | 0.093 | 0.05 | 1.011601 | 1.0233364 | 20.66041 | 0.03708  | 21.72 |
| 12     | 2016 | -0.19 | 0.05 | 1.011601 | 1.0233364 | 23.56508 | 0.098931 | 15.45 |
| 300303 | 2016 | 0.476 | 0.05 | 1.011601 | 1.0233364 | 21.78851 | 0.083451 | 22.94 |
| 600525 | 2016 | -0.14 | 0.05 | 1.011601 | 1.0233364 | 23.47182 | 0.094461 | 7.84  |
| 2609   | 2016 | 0.908 | 0.05 | 1.011601 | 1.0233364 | 21.62169 | 0.087596 | 35.42 |

|        |      |       |      |          |           |          |          |       |
|--------|------|-------|------|----------|-----------|----------|----------|-------|
| 2130   | 2016 | -0.63 | 0.05 | 1.011601 | 1.0233364 | 22.4023  | 0.040041 | 24.64 |
| 2289   | 2016 | 0.388 | 0.05 | 1.011601 | 1.0233364 | 21.0502  | 0.044712 | 8.42  |
| 70     | 2016 | -0.04 | 0.05 | 1.011601 | 1.0233364 | 21.84474 | 0.032292 | 39.18 |
| 300012 | 2016 | 0.354 | 0.05 | 1.011601 | 1.0233364 | 21.86193 | 0.04517  | 13.81 |
| 2436   | 2016 | 0.889 | 0.05 | 1.011601 | 1.0233364 | 22.17036 | 0.09118  | 17.77 |
| 2782   | 2016 | -0.79 | 0.05 | 1.011601 | 1.0233364 | 20.7519  | 0.07204  | 35.56 |
| 78     | 2016 | 0.39  | 0.05 | 1.011601 | 1.0233364 | 23.53636 | 0.084867 | 45.93 |
| 63     | 2016 | 1.16  | 0.05 | 1.011601 | 1.0233364 | 25.67656 | -0.19898 | 30.35 |
| 600525 | 2016 | 0.497 | 0.05 | 1.011601 | 1.0233364 | 23.47182 | 0.094461 | 7.84  |
| 2733   | 2016 | -0.05 | 0.05 | 1.011601 | 1.0233364 | 21.66658 | 0.054154 | 36.26 |
| 300199 | 2016 | 1.177 | 0.05 | 1.011601 | 1.0233364 | 22.21774 | 0.080987 | 25.82 |
| 2672   | 2016 | -0.64 | 0.05 | 1.011601 | 1.0233364 | 22.82608 | 0.149297 | 22.56 |
| 2551   | 2016 | -0.67 | 0.05 | 1.011601 | 1.0233364 | 22.124   | 0.062795 | 41.91 |
| 2456   | 2016 | -0.07 | 0.05 | 1.011601 | 1.0233364 | 23.87746 | 0.089165 | 19.28 |
| 2518   | 2016 | -0.51 | 0.05 | 1.011601 | 1.0233364 | 21.76063 | 0.15033  | 60.1  |
| 300232 | 2016 | -0.54 | 0.05 | 1.011601 | 1.0233364 | 21.68096 | 0.109479 | 43.28 |
| 2475   | 2016 | 0.133 | 0.05 | 1.011601 | 1.0233364 | 23.76563 | 0.097451 | 50.06 |
| 2215   | 2016 | 0.658 | 0.05 | 1.011601 | 1.0233364 | 21.87017 | -0.15868 | 27.56 |
| 2475   | 2016 | 0.079 | 0.05 | 1.011601 | 1.0233364 | 23.76563 | 0.097451 | 50.06 |
| 300264 | 2016 | 1.328 | 0.05 | 1.011601 | 1.0233364 | 20.61357 | 0.010715 | 29.49 |
| 9      | 2016 | 0.153 | 0.05 | 1.011601 | 1.0233364 | 23.79702 | -0.02796 | 11.91 |
| 39     | 2016 | 0.203 | 0.05 | 1.011601 | 1.0233364 | 25.54849 | 0.018781 | 55.44 |
| 2294   | 2016 | 0.352 | 0.05 | 1.011601 | 1.0233364 | 22.60031 | 0.254583 | 67.73 |
| 2256   | 2016 | 0.732 | 0.05 | 1.011601 | 1.0233364 | 21.70602 | 0.052194 | 26.23 |
| 2238   | 2016 | -0.49 | 0.05 | 1.011601 | 1.0233364 | 21.81498 | 0.110719 | 57.77 |
| 600446 | 2016 | 1.783 | 0.05 | 1.011601 | 1.0233364 | 21.87843 | 0.163568 | 10.7  |
| 300241 | 2016 | -0.36 | 0.05 | 1.011601 | 1.0233364 | 21.36223 | 0.048855 | 26.52 |
| 9      | 2016 | 0.595 | 0.05 | 1.011601 | 1.0233364 | 23.79702 | -0.02796 | 11.91 |
| 2294   | 2016 | 0.327 | 0.05 | 1.011601 | 1.0233364 | 22.5291  | 0.254583 | 67.73 |
| 9      | 2016 | -0.08 | 0.05 | 1.011601 | 1.0233364 | 23.79702 | -0.02796 | 11.91 |
| 2340   | 2016 | -0.09 | 0.05 | 1.011601 | 1.0233364 | 23.6715  | 0.041603 | 12.54 |
| 2775   | 2016 | -0.18 | 0.05 | 1.011601 | 1.0233364 | 21.50607 | 0.119414 | 20.65 |
| 300037 | 2016 | 1.007 | 0.05 | 1.011601 | 1.0233364 | 21.75186 | 0.119079 | 15.51 |
| 39     | 2016 | -0.44 | 0.05 | 1.011601 | 1.0233364 | 25.54849 | 0.018781 | 55.44 |
| 2047   | 2016 | -0.04 | 0.05 | 1.011601 | 1.0233364 | 22.89373 | 0.141863 | 21.51 |
| 300162 | 2016 | 0.197 | 0.05 | 1.011601 | 1.0233364 | 21.12846 | 0.026709 | 22.53 |
| 2294   | 2016 | 0.327 | 0.05 | 1.011601 | 1.0233364 | 22.60031 | 0.254583 | 67.73 |
| 49     | 2016 | -0.19 | 0.05 | 1.011601 | 1.0233364 | 20.10336 | 0.233108 | 45.23 |
| 300154 | 2016 | 0.284 | 0.05 | 1.011601 | 1.0233364 | 21.30185 | 0.044678 | 39.52 |
| 2421   | 2016 | 0.605 | 0.05 | 1.011601 | 1.0233364 | 22.29824 | 0.099328 | 20.77 |
| 2587   | 2016 | 0.331 | 0.05 | 1.011601 | 1.0233364 | 20.9043  | 0.096996 | 28.36 |
| 2786   | 2016 | -0.3  | 0.05 | 1.011601 | 1.0233364 | 21.86134 | 0.097421 | 35.74 |
| 2047   | 2016 | -0.27 | 0.05 | 1.011601 | 1.0233364 | 22.89373 | 0.141863 | 21.51 |
| 2215   | 2016 | -0.22 | 0.05 | 1.011601 | 1.0233364 | 21.87017 | -0.15868 | 27.56 |
| 2436   | 2016 | 0.135 | 0.05 | 1.011601 | 1.0233364 | 22.17036 | 0.09118  | 17.77 |
| 2766   | 2016 | -0.12 | 0.05 | 1.011601 | 1.0233364 | 21.30138 | -0.0713  | 48.49 |
| 300457 | 2016 | -0.38 | 0.05 | 1.011601 | 1.0233364 | 21.30455 | 0.199897 | 45.27 |
| 2215   | 2016 | 0.371 | 0.05 | 1.011601 | 1.0233364 | 21.87017 | -0.15868 | 27.56 |
| 2482   | 2016 | 0.192 | 0.05 | 1.011601 | 1.0233364 | 23.48614 | 0.063532 | 38.18 |
| 300193 | 2016 | -0.24 | 0.05 | 1.011601 | 1.0233364 | 21.63289 | 0.048537 | 19.66 |
| 600525 | 2016 | 0.921 | 0.05 | 1.011601 | 1.0233364 | 23.47182 | 0.094461 | 7.84  |
| 2429   | 2016 | -0.05 | 0.05 | 1.011601 | 1.0233364 | 23.23253 | 0.045673 | 54.5  |
| 2352   | 2016 | 0.399 | 0.05 | 1.011601 | 1.0233364 | 24.51052 | 0.202406 | 42.9  |
| 2197   | 2016 | -0.49 | 0.05 | 1.011601 | 1.0233364 | 22.28122 | 0.018141 | 20.14 |

|        |      |       |      |          |           |          |          |       |
|--------|------|-------|------|----------|-----------|----------|----------|-------|
| 2197   | 2016 | 0.499 | 0.05 | 1.011601 | 1.0233364 | 22.28122 | 0.018141 | 20.14 |
| 2672   | 2016 | -0.64 | 0.05 | 1.011601 | 1.0233364 | 22.82608 | 0.149297 | 22.56 |
| 2775   | 2016 | -0.18 | 0.05 | 1.011601 | 1.0233364 | 21.50607 | 0.119414 | 20.65 |
| 2163   | 2016 | -0.15 | 0.05 | 1.011601 | 1.0233364 | 21.76325 | -0.06801 | 13.74 |
| 2303   | 2016 | -0.04 | 0.05 | 1.011601 | 1.0233364 | 22.29515 | 0.054002 | 42.44 |
| 2191   | 2016 | -0.41 | 0.05 | 1.011601 | 1.0233364 | 22.62249 | 0.132569 | 32.73 |
| 2583   | 2016 | 1.121 | 0.05 | 1.011601 | 1.0233364 | 22.64138 | 0.084508 | 51.66 |
| 69     | 2016 | -0.98 | 0.05 | 1.011601 | 1.0233364 | 25.70923 | 0.094797 | 53.47 |
| 2672   | 2016 | -0.2  | 0.05 | 1.011601 | 1.0233364 | 22.82608 | 0.149297 | 22.56 |
| 2351   | 2016 | 0.248 | 0.05 | 1.011601 | 1.0233364 | 21.38674 | 0.046333 | 31.7  |
| 300037 | 2016 | 0.986 | 0.05 | 1.011601 | 1.0233364 | 21.75186 | 0.119079 | 15.51 |
| 600525 | 2016 | -0.14 | 0.05 | 1.011601 | 1.0233364 | 23.47182 | 0.094461 | 7.84  |
| 300124 | 2016 | 0.093 | 0.05 | 1.011601 | 1.0233364 | 22.3219  | 0.196731 | 19.26 |
| 39     | 2016 | 0.203 | 0.05 | 1.011601 | 1.0233364 | 25.54849 | 0.018781 | 55.44 |
| 1979   | 2016 | -0.99 | 0.05 | 1.011601 | 1.0233364 | 25.74206 | 0.156592 | 66.1  |
| 2197   | 2016 | 0.273 | 0.05 | 1.011601 | 1.0233364 | 22.28122 | 0.018141 | 20.14 |
| 300311 | 2016 | 0.538 | 0.05 | 1.011601 | 1.0233364 | 21.30365 | 0.098449 | 39.46 |
| 39     | 2016 | -0.38 | 0.05 | 1.011601 | 1.0233364 | 25.54849 | 0.018781 | 55.44 |
| 2475   | 2016 | -0.53 | 0.05 | 1.011601 | 1.0233364 | 23.76563 | 0.097451 | 50.06 |
| 603808 | 2016 | -0.01 | 0.05 | 1.011601 | 1.0233364 | 21.66697 | 0.122897 | 61.99 |
| 2352   | 2016 | -0.46 | 0.05 | 1.011601 | 1.0233364 | 24.51052 | 0.202406 | 42.9  |
| 603118 | 2016 | 0.307 | 0.05 | 1.011601 | 1.0233364 | 22.63374 | 0.079281 | 24.95 |
| 2369   | 2016 | -0.44 | 0.05 | 1.011601 | 1.0233364 | 21.69089 | 0.008909 | 16.33 |
| 300349 | 2016 | -0.01 | 0.04 | 1.764734 | 3.1142869 | 21.92639 | 0.034531 | 27.84 |
| 2154   | 2016 | -0.84 | 0.04 | 1.764734 | 3.1142869 | 22.14918 | -0.16142 | 10.76 |
| 2154   | 2016 | -0.84 | 0.04 | 1.764734 | 3.1142869 | 22.14918 | -0.16142 | 10.76 |
| 300412 | 2016 | -0.5  | 0.04 | 1.764734 | 3.1142869 | 20.7322  | 0.078083 | 35.64 |
| 2687   | 2016 | -0.63 | 0.04 | 1.764734 | 3.1142869 | 21.06602 | 0.063866 | 13.54 |
| 601877 | 2016 | -0.25 | 0.04 | 1.764734 | 3.1142869 | 24.28873 | 0.18627  | 53.26 |
| 601877 | 2016 | -0.54 | 0.04 | 1.764734 | 3.1142869 | 24.28873 | 0.18627  | 53.26 |
| 601877 | 2016 | -0.27 | 0.04 | 1.764734 | 3.1142869 | 24.28873 | 0.18627  | 53.26 |
| 2687   | 2016 | -0.63 | 0.04 | 1.764734 | 3.1142869 | 21.06602 | 0.063866 | 13.54 |
| 300283 | 2016 | 0.695 | 0.04 | 1.764734 | 3.1142869 | 20.92381 | 0.032529 | 58.3  |
| 300032 | 2016 | -0.25 | 0.04 | 1.764734 | 3.1142869 | 22.44444 | 0.01983  | 39.04 |
| 300349 | 2016 | 0.397 | 0.04 | 1.764734 | 3.1142869 | 21.92639 | 0.034531 | 27.84 |
| 2730   | 2016 | -0.42 | 0.04 | 1.764734 | 3.1142869 | 21.0842  | 0.050113 | 51.14 |
| 300283 | 2016 | 0.695 | 0.04 | 1.764734 | 3.1142869 | 20.92381 | 0.032529 | 58.3  |
| 2687   | 2016 | -0.63 | 0.04 | 1.764734 | 3.1142869 | 21.06602 | 0.063866 | 13.54 |
| 603001 | 2016 | -0.81 | 0.04 | 1.764734 | 3.1142869 | 22.43616 | 0.074522 | 32.73 |
| 2687   | 2016 | -0.63 | 0.04 | 1.764734 | 3.1142869 | 21.06602 | 0.063866 | 13.54 |
| 2687   | 2016 | -0.79 | 0.04 | 1.764734 | 3.1142869 | 21.06602 | 0.063866 | 13.54 |
| 300349 | 2016 | 0.21  | 0.04 | 1.764734 | 3.1142869 | 21.92639 | 0.034531 | 27.84 |
| 300032 | 2016 | -0.7  | 0.04 | 1.764734 | 3.1142869 | 22.58663 | 0.01983  | 39.04 |
| 600290 | 2016 | -0.3  | 0.04 | 1.764734 | 3.1142869 | 22.66724 | -0.01149 | 30.83 |
| 2563   | 2016 | -0.3  | 0.04 | 1.764734 | 3.1142869 | 23.28421 | 0.140243 | 17.23 |
| 2629   | 2016 | -0.08 | 0.04 | 1.764734 | 3.1142869 | 20.46151 | 0.034267 | 14.64 |
| 300032 | 2016 | -0.8  | 0.04 | 1.764734 | 3.1142869 | 22.58663 | 0.01983  | 39.04 |
| 600290 | 2016 | -0.22 | 0.04 | 1.764734 | 3.1142869 | 22.66724 | -0.01149 | 30.83 |
| 300412 | 2016 | -0.46 | 0.04 | 1.764734 | 3.1142869 | 20.60785 | 0.078083 | 35.64 |
| 2064   | 2016 | 0.622 | 0.04 | 1.764734 | 3.1142869 | 22.40728 | -0.10075 | 29.66 |
| 601877 | 2016 | -0.44 | 0.04 | 1.764734 | 3.1142869 | 24.28873 | 0.18627  | 53.26 |
| 2154   | 2016 | -0.56 | 0.04 | 1.764734 | 3.1142869 | 22.14918 | -0.16142 | 10.76 |
| 2563   | 2016 | -0.3  | 0.04 | 1.764734 | 3.1142869 | 23.28421 | 0.140243 | 17.23 |
| 603568 | 2016 | -0.33 | 0.04 | 1.764734 | 3.1142869 | 21.93614 | 0.171306 | 44.84 |

|        |      |       |      |          |           |          |          |       |
|--------|------|-------|------|----------|-----------|----------|----------|-------|
| 603001 | 2016 | -0.81 | 0.04 | 1.764734 | 3.1142869 | 22.43616 | 0.074522 | 32.73 |
| 300349 | 2016 | 0.21  | 0.04 | 1.764734 | 3.1142869 | 21.92639 | 0.034531 | 27.84 |
| 603116 | 2016 | -0.17 | 0.04 | 1.764734 | 3.1142869 | 21.97675 | 0.085488 | 43.94 |
| 603116 | 2016 | -0.75 | 0.04 | 1.764734 | 3.1142869 | 22.20289 | 0.085488 | 43.94 |
| 603116 | 2016 | -0.17 | 0.04 | 1.764734 | 3.1142869 | 22.20289 | 0.085488 | 43.94 |
| 603116 | 2016 | -0.17 | 0.04 | 1.764734 | 3.1142869 | 22.20289 | 0.085488 | 43.94 |
| 2730   | 2016 | -0.42 | 0.04 | 1.764734 | 3.1142869 | 21.0842  | 0.050113 | 51.14 |
| 601877 | 2016 | -0.54 | 0.04 | 1.764734 | 3.1142869 | 24.28873 | 0.18627  | 53.26 |
| 600290 | 2016 | -0.31 | 0.04 | 1.764734 | 3.1142869 | 22.66724 | -0.01149 | 30.83 |
| 601877 | 2016 | -0.18 | 0.04 | 1.764734 | 3.1142869 | 24.28873 | 0.18627  | 53.26 |
| 300032 | 2016 | -0.8  | 0.04 | 1.764734 | 3.1142869 | 22.58663 | 0.01983  | 39.04 |
| 603568 | 2016 | -0.41 | 0.04 | 1.764734 | 3.1142869 | 21.93614 | 0.171306 | 44.84 |
| 2730   | 2016 | -0.1  | 0.04 | 1.764734 | 3.1142869 | 21.0842  | 0.050113 | 51.14 |
| 300032 | 2016 | -0.25 | 0.04 | 1.764734 | 3.1142869 | 22.58663 | 0.01983  | 39.04 |
| 601877 | 2016 | -0.63 | 0.04 | 1.764734 | 3.1142869 | 24.28873 | 0.18627  | 53.26 |
| 603568 | 2016 | -0.33 | 0.04 | 1.764734 | 3.1142869 | 21.93614 | 0.171306 | 44.84 |
| 2154   | 2016 | -0.18 | 0.04 | 1.764734 | 3.1142869 | 22.14918 | -0.16142 | 10.76 |
| 2730   | 2016 | -0.26 | 0.04 | 1.764734 | 3.1142869 | 21.0842  | 0.050113 | 51.14 |
| 601877 | 2016 | -0.53 | 0.04 | 1.764734 | 3.1142869 | 24.28873 | 0.18627  | 53.26 |
| 601877 | 2016 | -0.36 | 0.04 | 1.764734 | 3.1142869 | 24.28873 | 0.18627  | 53.26 |
| 601877 | 2016 | -0.54 | 0.04 | 1.764734 | 3.1142869 | 24.28873 | 0.18627  | 53.26 |
| 600290 | 2016 | 0.63  | 0.04 | 1.764734 | 3.1142869 | 22.66724 | -0.01149 | 30.83 |
| 601877 | 2016 | -0.25 | 0.04 | 1.764734 | 3.1142869 | 23.60108 | 0.18627  | 53.26 |
| 2629   | 2016 | -0.08 | 0.04 | 1.764734 | 3.1142869 | 20.46151 | 0.034267 | 14.64 |
| 600290 | 2016 | -0.69 | 0.04 | 1.764734 | 3.1142869 | 22.66724 | -0.01149 | 30.83 |
| 2064   | 2016 | 0.622 | 0.04 | 1.764734 | 3.1142869 | 22.09882 | -0.10075 | 29.66 |
| 2154   | 2016 | -0.84 | 0.04 | 1.764734 | 3.1142869 | 21.99852 | -0.16142 | 10.76 |
| 2629   | 2016 | -0.08 | 0.04 | 1.764734 | 3.1142869 | 20.46151 | 0.034267 | 14.64 |
| 300032 | 2016 | -0.4  | 0.04 | 1.764734 | 3.1142869 | 22.58663 | 0.01983  | 39.04 |
| 300412 | 2016 | -0.5  | 0.04 | 1.764734 | 3.1142869 | 20.7322  | 0.078083 | 35.64 |
| 601877 | 2016 | -0.43 | 0.04 | 1.764734 | 3.1142869 | 24.28873 | 0.18627  | 53.26 |
| 300412 | 2016 | -0.46 | 0.04 | 1.764734 | 3.1142869 | 20.7322  | 0.078083 | 35.64 |
| 300349 | 2016 | 0.784 | 0.04 | 1.764734 | 3.1142869 | 21.92639 | 0.034531 | 27.84 |
| 600290 | 2016 | -0.31 | 0.04 | 1.764734 | 3.1142869 | 22.66724 | -0.01149 | 30.83 |
| 601877 | 2016 | -0.18 | 0.04 | 1.764734 | 3.1142869 | 24.28873 | 0.18627  | 53.26 |
| 2629   | 2016 | -0.08 | 0.04 | 1.764734 | 3.1142869 | 20.46151 | 0.034267 | 14.64 |
| 300349 | 2016 | 0.21  | 0.04 | 1.764734 | 3.1142869 | 21.83776 | 0.034531 | 27.84 |
| 2154   | 2016 | -0.84 | 0.04 | 1.764734 | 3.1142869 | 22.14918 | -0.16142 | 10.76 |
| 601877 | 2016 | -0.63 | 0.04 | 1.764734 | 3.1142869 | 24.28873 | 0.18627  | 53.26 |
| 300283 | 2016 | 0.695 | 0.04 | 1.764734 | 3.1142869 | 20.92381 | 0.032529 | 58.3  |
| 600290 | 2016 | 0.63  | 0.04 | 1.764734 | 3.1142869 | 22.66724 | -0.01149 | 30.83 |
| 603568 | 2016 | -0.63 | 0.04 | 1.764734 | 3.1142869 | 21.19231 | 0.171306 | 44.84 |
| 2154   | 2016 | -0.18 | 0.04 | 1.764734 | 3.1142869 | 22.14918 | -0.16142 | 10.76 |
| 2730   | 2016 | -0.42 | 0.04 | 1.764734 | 3.1142869 | 21.0842  | 0.050113 | 51.14 |
| 300032 | 2016 | -0.68 | 0.04 | 1.764734 | 3.1142869 | 22.58663 | 0.01983  | 39.04 |
| 300283 | 2016 | 0.695 | 0.04 | 1.764734 | 3.1142869 | 20.92381 | 0.032529 | 58.3  |
| 2730   | 2016 | 0.02  | 0.04 | 1.764734 | 3.1142869 | 21.0842  | 0.050113 | 51.14 |
| 601877 | 2016 | -0.44 | 0.04 | 1.764734 | 3.1142869 | 24.28873 | 0.18627  | 53.26 |
| 2563   | 2016 | -0.3  | 0.04 | 1.764734 | 3.1142869 | 23.26986 | 0.140243 | 17.23 |
| 2629   | 2016 | -0.08 | 0.04 | 1.764734 | 3.1142869 | 20.43849 | 0.034267 | 14.64 |
| 2064   | 2016 | 0.34  | 0.04 | 1.764734 | 3.1142869 | 22.40728 | -0.10075 | 29.66 |
| 300283 | 2016 | 0.695 | 0.04 | 1.764734 | 3.1142869 | 20.72512 | 0.032529 | 58.3  |
| 2064   | 2016 | 0.288 | 0.04 | 1.764734 | 3.1142869 | 22.40728 | -0.10075 | 29.66 |
| 603001 | 2016 | -0.81 | 0.04 | 1.764734 | 3.1142869 | 22.1995  | 0.074522 | 32.73 |

|        |      |       |      |          |            |          |          |       |
|--------|------|-------|------|----------|------------|----------|----------|-------|
| 603568 | 2016 | -0.63 | 0.04 | 1.764734 | 3.1142869  | 21.93614 | 0.171306 | 44.84 |
| 600290 | 2016 | -0.69 | 0.04 | 1.764734 | 3.1142869  | 22.66724 | -0.01149 | 30.83 |
| 300032 | 2016 | -0.8  | 0.04 | 1.764734 | 3.1142869  | 22.58663 | 0.01983  | 39.04 |
| 2687   | 2016 | -0.15 | 0.04 | 1.764734 | 3.1142869  | 20.88579 | 0.063866 | 13.54 |
| 600290 | 2016 | -0.31 | 0.04 | 1.764734 | 3.1142869  | 22.66724 | -0.01149 | 30.83 |
| 300032 | 2016 | -0.4  | 0.04 | 1.764734 | 3.1142869  | 22.58663 | 0.01983  | 39.04 |
| 601877 | 2016 | -0.54 | 0.04 | 1.764734 | 3.1142869  | 24.28873 | 0.18627  | 53.26 |
| 2064   | 2016 | 0.288 | 0.04 | 1.764734 | 3.1142869  | 22.40728 | -0.10075 | 29.66 |
| 300412 | 2016 | -0.5  | 0.04 | 1.764734 | 3.1142869  | 20.7322  | 0.078083 | 35.64 |
| 2154   | 2016 | -0.84 | 0.04 | 1.764734 | 3.1142869  | 22.14918 | -0.16142 | 10.76 |
| 300032 | 2016 | -0.55 | 0.04 | 1.764734 | 3.1142869  | 22.58663 | 0.01983  | 39.04 |
| 603116 | 2016 | -0.83 | 0.04 | 1.764734 | 3.1142869  | 22.20289 | 0.085488 | 43.94 |
| 601877 | 2016 | -0.27 | 0.04 | 1.764734 | 3.1142869  | 24.28873 | 0.18627  | 53.26 |
| 2154   | 2016 | -0.2  | 0.04 | 1.764734 | 3.1142869  | 22.14918 | -0.16142 | 10.76 |
| 300412 | 2016 | -0.46 | 0.04 | 1.764734 | 3.1142869  | 20.7322  | 0.078083 | 35.64 |
| 600290 | 2016 | -0.13 | 0.04 | 1.764734 | 3.1142869  | 22.66724 | -0.01149 | 30.83 |
| 2629   | 2016 | -0.08 | 0.04 | 1.764734 | 3.1142869  | 20.46151 | 0.034267 | 14.64 |
| 2730   | 2016 | -0.25 | 0.04 | 1.764734 | 3.1142869  | 20.87062 | 0.050113 | 51.14 |
| 300032 | 2016 | -0.7  | 0.04 | 1.764734 | 3.1142869  | 22.58663 | 0.01983  | 39.04 |
| 2629   | 2016 | -0.08 | 0.04 | 1.764734 | 3.1142869  | 20.46151 | 0.034267 | 14.64 |
| 2687   | 2016 | -0.79 | 0.04 | 1.764734 | 3.1142869  | 21.06602 | 0.063866 | 13.54 |
| 300032 | 2016 | 0.523 | 0.04 | 1.764734 | 3.1142869  | 22.58663 | 0.01983  | 39.04 |
| 601877 | 2016 | -0.63 | 0.04 | 1.764734 | 3.1142869  | 24.28873 | 0.18627  | 53.26 |
| 603116 | 2016 | -0.83 | 0.04 | 1.764734 | 3.1142869  | 22.20289 | 0.085488 | 43.94 |
| 600290 | 2016 | -0.43 | 0.04 | 1.764734 | 3.1142869  | 22.38496 | -0.01149 | 30.83 |
| 300032 | 2016 | -0.25 | 0.04 | 1.764734 | 3.1142869  | 22.58663 | 0.01983  | 39.04 |
| 300349 | 2016 | 0.372 | 0.04 | 1.764734 | 3.1142869  | 21.92639 | 0.034531 | 27.84 |
| 603338 | 2016 | -0.04 | 0.04 | 0.0066   | 0.00004356 | 21.03902 | 0.161157 | 51.71 |
| 2443   | 2016 | -0.35 | 0.04 | 0.0066   | 0.00004356 | 21.90484 | 0.029248 | 9.03  |
| 2034   | 2016 | -0.32 | 0.04 | 0.0066   | 0.00004356 | 20.80838 | 0.027123 | 40.55 |
| 603600 | 2016 | -0.52 | 0.04 | 0.0066   | 0.00004356 | 20.66176 | 0.191262 | 31.13 |
| 2427   | 2016 | -0.49 | 0.04 | 0.0066   | 0.00004356 | 22.47001 | 0.077627 | 29.8  |
| 2443   | 2016 | -0.34 | 0.04 | 0.0066   | 0.00004356 | 21.74577 | 0.029248 | 9.03  |
| 2443   | 2016 | -0.34 | 0.04 | 0.0066   | 0.00004356 | 21.90484 | 0.029248 | 9.03  |
| 603611 | 2016 | -0.21 | 0.04 | 0.0066   | 0.00004356 | 21.63104 | 0.110037 | 29.59 |
| 603611 | 2016 | -0.01 | 0.04 | 0.0066   | 0.00004356 | 21.63104 | 0.110037 | 29.59 |
| 2427   | 2016 | -0.71 | 0.04 | 0.0066   | 0.00004356 | 22.47001 | 0.077627 | 29.8  |
| 600226 | 2016 | 0.459 | 0.04 | 0.0066   | 0.00004356 | 21.93853 | 0.136541 | 15    |
| 2318   | 2016 | 0.681 | 0.04 | 0.0066   | 0.00004356 | 22.07839 | 0.059269 | 37.16 |
| 2082   | 2016 | -0.63 | 0.04 | 0.0066   | 0.00004356 | 21.22913 | 0.052546 | 9.44  |
| 603789 | 2016 | -0.06 | 0.04 | 0.0066   | 0.00004356 | 21.16219 | 0.040474 | 32.72 |
| 2427   | 2016 | -0.45 | 0.04 | 0.0066   | 0.00004356 | 22.25724 | 0.077627 | 29.8  |
| 2034   | 2016 | -0.32 | 0.04 | 0.0066   | 0.00004356 | 20.80838 | 0.027123 | 40.55 |
| 2082   | 2016 | -0.63 | 0.04 | 0.0066   | 0.00004356 | 21.22913 | 0.052546 | 9.44  |
| 2443   | 2016 | -0.35 | 0.04 | 0.0066   | 0.00004356 | 21.90484 | 0.029248 | 9.03  |
| 2443   | 2016 | -0.35 | 0.04 | 0.0066   | 0.00004356 | 21.90484 | 0.029248 | 9.03  |
| 2043   | 2016 | -0.15 | 0.04 | 0.0066   | 0.00004356 | 21.40853 | 0.160941 | 29.19 |
| 600226 | 2016 | 0.639 | 0.04 | 0.0066   | 0.00004356 | 21.93853 | 0.136541 | 15    |
| 2756   | 2016 | -0.58 | 0.04 | 0.0066   | 0.00004356 | 21.94186 | 0.082623 | 51.86 |
| 2756   | 2016 | -0.09 | 0.04 | 0.0066   | 0.00004356 | 21.96602 | 0.082623 | 51.86 |
| 603611 | 2016 | -0.66 | 0.04 | 0.0066   | 0.00004356 | 21.36119 | 0.110037 | 29.59 |
| 603789 | 2016 | -0.06 | 0.04 | 0.0066   | 0.00004356 | 21.16219 | 0.040474 | 32.72 |
| 2034   | 2016 | -0.32 | 0.04 | 0.0066   | 0.00004356 | 20.77354 | 0.027123 | 40.55 |
| 2318   | 2016 | 0.016 | 0.04 | 0.0066   | 0.00004356 | 22.07839 | 0.059269 | 37.16 |

|        |      |       |      |          |            |          |          |       |
|--------|------|-------|------|----------|------------|----------|----------|-------|
| 603600 | 2016 | -0.72 | 0.04 | 0.0066   | 0.00004356 | 20.42182 | 0.191262 | 31.13 |
| 603789 | 2016 | -0.11 | 0.04 | 0.0066   | 0.00004356 | 21.0441  | 0.040474 | 32.72 |
| 600226 | 2016 | 0.427 | 0.04 | 0.0066   | 0.00004356 | 21.93853 | 0.136541 | 15    |
| 2318   | 2016 | -0.12 | 0.04 | 0.0066   | 0.00004356 | 22.07839 | 0.059269 | 37.16 |
| 603611 | 2016 | 0.219 | 0.04 | 0.0066   | 0.00004356 | 21.63104 | 0.110037 | 29.59 |
| 2756   | 2016 | -0.09 | 0.04 | 0.0066   | 0.00004356 | 21.96602 | 0.082623 | 51.86 |
| 2427   | 2016 | -0.45 | 0.04 | 0.0066   | 0.00004356 | 22.47001 | 0.077627 | 29.8  |
| 2318   | 2016 | -0.64 | 0.04 | 0.0066   | 0.00004356 | 22.07839 | 0.059269 | 37.16 |
| 600226 | 2016 | 0.488 | 0.04 | 0.0066   | 0.00004356 | 21.93853 | 0.136541 | 15    |
| 603789 | 2016 | -0.12 | 0.04 | 0.0066   | 0.00004356 | 21.0441  | 0.040474 | 32.72 |
| 2318   | 2016 | -0.43 | 0.04 | 0.0066   | 0.00004356 | 22.07839 | 0.059269 | 37.16 |
| 2034   | 2016 | -0.06 | 0.04 | 0.0066   | 0.00004356 | 20.80838 | 0.027123 | 40.55 |
| 2318   | 2016 | -0.12 | 0.04 | 0.0066   | 0.00004356 | 22.07839 | 0.059269 | 37.16 |
| 603600 | 2016 | -0.44 | 0.04 | 0.0066   | 0.00004356 | 20.66176 | 0.191262 | 31.13 |
| 2318   | 2016 | -0.32 | 0.04 | 0.0066   | 0.00004356 | 22.07839 | 0.059269 | 37.16 |
| 2043   | 2016 | -0.15 | 0.04 | 0.0066   | 0.00004356 | 21.40853 | 0.160941 | 29.19 |
| 2043   | 2016 | -0.15 | 0.04 | 0.0066   | 0.00004356 | 21.22483 | 0.160941 | 29.19 |
| 600226 | 2016 | 0.639 | 0.04 | 0.0066   | 0.00004356 | 21.93853 | 0.136541 | 15    |
| 600226 | 2016 | 0.639 | 0.04 | 0.0066   | 0.00004356 | 21.93853 | 0.136541 | 15    |
| 603600 | 2016 | -0.52 | 0.04 | 0.0066   | 0.00004356 | 20.66176 | 0.191262 | 31.13 |
| 2443   | 2016 | -0.35 | 0.04 | 0.0066   | 0.00004356 | 21.90484 | 0.029248 | 9.03  |
| 2756   | 2016 | -0.58 | 0.04 | 0.0066   | 0.00004356 | 21.96602 | 0.082623 | 51.86 |
| 603338 | 2016 | -0.04 | 0.04 | 0.0066   | 0.00004356 | 21.00858 | 0.161157 | 51.71 |
| 600226 | 2016 | 0.488 | 0.04 | 0.0066   | 0.00004356 | 21.93853 | 0.136541 | 15    |
| 603600 | 2016 | -0.46 | 0.04 | 0.0066   | 0.00004356 | 20.66176 | 0.191262 | 31.13 |
| 600226 | 2016 | 0.639 | 0.04 | 0.0066   | 0.00004356 | 21.93853 | 0.136541 | 15    |
| 2043   | 2016 | -0.15 | 0.04 | 0.0066   | 0.00004356 | 21.40853 | 0.160941 | 29.19 |
| 603611 | 2016 | -0.29 | 0.04 | 0.0066   | 0.00004356 | 21.63104 | 0.110037 | 29.59 |
| 603338 | 2016 | -0.04 | 0.04 | 0.0066   | 0.00004356 | 21.03902 | 0.161157 | 51.71 |
| 2756   | 2016 | -0.18 | 0.04 | 0.0066   | 0.00004356 | 21.96602 | 0.082623 | 51.86 |
| 600226 | 2016 | 0.488 | 0.04 | 0.0066   | 0.00004356 | 21.89359 | 0.136541 | 15    |
| 2427   | 2016 | -0.45 | 0.04 | 0.0066   | 0.00004356 | 22.47001 | 0.077627 | 29.8  |
| 603611 | 2016 | -0.12 | 0.04 | 0.0066   | 0.00004356 | 21.63104 | 0.110037 | 29.59 |
| 603611 | 2016 | 0.105 | 0.04 | 0.0066   | 0.00004356 | 21.63104 | 0.110037 | 29.59 |
| 2443   | 2016 | -0.35 | 0.04 | 0.0066   | 0.00004356 | 21.90484 | 0.029248 | 9.03  |
| 2034   | 2016 | -0.06 | 0.04 | 0.0066   | 0.00004356 | 20.80838 | 0.027123 | 40.55 |
| 603611 | 2016 | -0.32 | 0.04 | 0.0066   | 0.00004356 | 21.63104 | 0.110037 | 29.59 |
| 2427   | 2016 | -0.71 | 0.04 | 0.0066   | 0.00004356 | 22.47001 | 0.077627 | 29.8  |
| 2043   | 2016 | -0.15 | 0.04 | 0.0066   | 0.00004356 | 21.40853 | 0.160941 | 29.19 |
| 2034   | 2016 | -0.65 | 0.04 | 0.0066   | 0.00004356 | 20.80838 | 0.027123 | 40.55 |
| 2443   | 2016 | -0.35 | 0.04 | 0.0066   | 0.00004356 | 21.90484 | 0.029248 | 9.03  |
| 2318   | 2016 | 0.016 | 0.04 | 0.0066   | 0.00004356 | 22.00423 | 0.059269 | 37.16 |
| 600226 | 2016 | 0.639 | 0.04 | 0.0066   | 0.00004356 | 21.93853 | 0.136541 | 15    |
| 603600 | 2016 | -0.51 | 0.04 | 0.0066   | 0.00004356 | 20.66176 | 0.191262 | 31.13 |
| 603789 | 2016 | -0.12 | 0.04 | 0.0066   | 0.00004356 | 21.0441  | 0.040474 | 32.72 |
| 2082   | 2016 | -0.63 | 0.04 | 0.0066   | 0.00004356 | 20.94899 | 0.052546 | 9.44  |
| 2082   | 2016 | -0.63 | 0.04 | 0.0066   | 0.00004356 | 21.22913 | 0.052546 | 9.44  |
| 2034   | 2016 | -0.65 | 0.04 | 0.0066   | 0.00004356 | 20.80838 | 0.027123 | 40.55 |
| 2082   | 2016 | -0.63 | 0.04 | 0.0066   | 0.00004356 | 21.22913 | 0.052546 | 9.44  |
| 519    | 2016 | -0.21 | 0.04 | 0.336472 | 0.11321357 | 22.65329 | 0.021092 | 33.68 |
| 600416 | 2016 | 0.67  | 0.04 | 0.336472 | 0.11321357 | 23.71282 | 0.020474 | 33.54 |
| 600416 | 2016 | 0.627 | 0.04 | 0.336472 | 0.11321357 | 23.71282 | 0.020474 | 33.54 |
| 519    | 2016 | -0.54 | 0.04 | 0.336472 | 0.11321357 | 22.65329 | 0.021092 | 33.68 |
| 519    | 2016 | 0.783 | 0.04 | 0.336472 | 0.11321357 | 22.65329 | 0.021092 | 33.68 |



|        |      |       |      |          |            |          |          |       |
|--------|------|-------|------|----------|------------|----------|----------|-------|
| 519    | 2016 | -0.43 | 0.04 | 0.336472 | 0.11321357 | 23.05159 | 0.021092 | 33.68 |
| 600416 | 2016 | 0.672 | 0.04 | 0.336472 | 0.11321357 | 23.71282 | 0.020474 | 33.54 |
| 600416 | 2016 | 0.672 | 0.04 | 0.336472 | 0.11321357 | 23.71282 | 0.020474 | 33.54 |
| 519    | 2016 | -0.54 | 0.04 | 0.336472 | 0.11321357 | 22.65329 | 0.021092 | 33.68 |
| 600416 | 2016 | 0.627 | 0.04 | 0.336472 | 0.11321357 | 23.71282 | 0.020474 | 33.54 |
| 519    | 2016 | -0.54 | 0.04 | 0.336472 | 0.11321357 | 22.65329 | 0.021092 | 33.68 |
| 519    | 2016 | -0.28 | 0.04 | 0.336472 | 0.11321357 | 22.65329 | 0.021092 | 33.68 |
| 519    | 2016 | -0.04 | 0.04 | 0.336472 | 0.11321357 | 22.65329 | 0.021092 | 33.68 |
| 519    | 2016 | -0.54 | 0.04 | 0.336472 | 0.11321357 | 22.65329 | 0.021092 | 33.68 |
| 600416 | 2016 | 0.627 | 0.04 | 0.336472 | 0.11321357 | 23.31281 | 0.020474 | 33.54 |
| 519    | 2016 | -0.54 | 0.04 | 0.336472 | 0.11321357 | 22.65329 | 0.021092 | 33.68 |
| 519    | 2016 | -0.54 | 0.04 | 0.336472 | 0.11321357 | 22.65329 | 0.021092 | 33.68 |
| 600416 | 2016 | 0.627 | 0.04 | 0.336472 | 0.11321357 | 23.71282 | 0.020474 | 33.54 |
| 519    | 2016 | -0.21 | 0.04 | 0.336472 | 0.11321357 | 22.65329 | 0.021092 | 33.68 |
| 600416 | 2016 | 0.627 | 0.04 | 0.336472 | 0.11321357 | 23.71282 | 0.020474 | 33.54 |
| 600433 | 2016 | -0.36 | 0.05 | 1.07606  | 1.1579049  | 22.15326 | 0.040882 | 29.1  |
| 300094 | 2016 | -0.6  | 0.05 | 1.07606  | 1.1579049  | 21.85093 | 0.051775 | 32.72 |
| 300094 | 2016 | -0.6  | 0.05 | 1.07606  | 1.1579049  | 21.64085 | 0.051775 | 32.72 |
| 300094 | 2016 | -0.76 | 0.05 | 1.07606  | 1.1579049  | 21.64085 | 0.051775 | 32.72 |
| 600433 | 2016 | 0.286 | 0.05 | 1.07606  | 1.1579049  | 22.15326 | 0.040882 | 29.1  |
| 300094 | 2016 | -0.76 | 0.05 | 1.07606  | 1.1579049  | 21.85093 | 0.051775 | 32.72 |
| 600433 | 2016 | 0.286 | 0.05 | 1.07606  | 1.1579049  | 22.15326 | 0.040882 | 29.1  |
| 600433 | 2016 | -0.04 | 0.05 | 1.07606  | 1.1579049  | 22.14992 | 0.040882 | 29.1  |
| 600433 | 2016 | -0.36 | 0.05 | 1.07606  | 1.1579049  | 22.15326 | 0.040882 | 29.1  |
| 300094 | 2016 | -0.76 | 0.05 | 1.07606  | 1.1579049  | 21.85093 | 0.051775 | 32.72 |
| 300094 | 2016 | -0.71 | 0.05 | 1.07606  | 1.1579049  | 21.85093 | 0.051775 | 32.72 |
| 600218 | 2016 | 0.198 | 0.03 | 0.025156 | 0.00063282 | 21.95049 | 0.049083 | 34.32 |
| 2597   | 2016 | -0.07 | 0.03 | 0.025156 | 0.00063282 | 22.18011 | 0.212595 | 51.79 |
| 600218 | 2016 | 0.281 | 0.03 | 0.025156 | 0.00063282 | 21.95049 | 0.049083 | 34.32 |
| 2597   | 2016 | 0.161 | 0.03 | 0.025156 | 0.00063282 | 22.18011 | 0.212595 | 51.79 |
| 2571   | 2016 | -0.69 | 0.03 | 0.025156 | 0.00063282 | 21.4192  | -0.03339 | 42.24 |
| 2571   | 2016 | -0.69 | 0.03 | 0.025156 | 0.00063282 | 21.44176 | -0.03339 | 42.24 |
| 2597   | 2016 | 0.072 | 0.03 | 0.025156 | 0.00063282 | 22.18011 | 0.212595 | 51.79 |
| 600218 | 2016 | 0.198 | 0.03 | 0.025156 | 0.00063282 | 21.95049 | 0.049083 | 34.32 |
| 600218 | 2016 | -0.23 | 0.03 | 0.025156 | 0.00063282 | 21.95049 | 0.049083 | 34.32 |
| 600218 | 2016 | -0.08 | 0.03 | 0.025156 | 0.00063282 | 21.95049 | 0.049083 | 34.32 |
| 600218 | 2016 | -0.23 | 0.03 | 0.025156 | 0.00063282 | 21.95049 | 0.049083 | 34.32 |
| 600218 | 2016 | 0.253 | 0.03 | 0.025156 | 0.00063282 | 21.84675 | 0.049083 | 34.32 |
| 2597   | 2016 | -0.7  | 0.03 | 0.025156 | 0.00063282 | 22.18011 | 0.212595 | 51.79 |
| 2571   | 2016 | -0.69 | 0.03 | 0.025156 | 0.00063282 | 21.4192  | -0.03339 | 42.24 |
| 2571   | 2016 | -0.69 | 0.03 | 0.025156 | 0.00063282 | 21.4192  | -0.03339 | 42.24 |
| 2571   | 2016 | -0.69 | 0.03 | 0.025156 | 0.00063282 | 21.4192  | -0.03339 | 42.24 |
| 2597   | 2016 | 0.161 | 0.03 | 0.025156 | 0.00063282 | 22.18011 | 0.212595 | 51.79 |
| 2597   | 2016 | -0.01 | 0.03 | 0.025156 | 0.00063282 | 22.02329 | 0.212595 | 51.79 |
| 600960 | 2016 | -0.2  | 0    | 0.305382 | 0.09325802 | 22.62476 | 0.032791 | 23.04 |
| 600960 | 2016 | -0.3  | 0    | 0.305382 | 0.09325802 | 22.62476 | 0.032791 | 23.04 |
| 600960 | 2016 | -0.55 | 0    | 0.305382 | 0.09325802 | 22.49623 | 0.032791 | 23.04 |
| 639    | 2016 | -0.35 | 0    | 0.305382 | 0.09325802 | 21.81498 | 0.050691 | 35    |
| 600960 | 2016 | -0.31 | 0    | 0.305382 | 0.09325802 | 22.62476 | 0.032791 | 23.04 |
| 600960 | 2016 | -0.65 | 0    | 0.305382 | 0.09325802 | 22.62476 | 0.032791 | 23.04 |
| 600960 | 2016 | -0.2  | 0    | 0.305382 | 0.09325802 | 22.62476 | 0.032791 | 23.04 |
| 600448 | 2016 | 0.714 | 0    | 0.305382 | 0.09325802 | 21.72516 | 0.012136 | 15.31 |
| 600448 | 2016 | 0.714 | 0    | 0.305382 | 0.09325802 | 21.72516 | 0.012136 | 15.31 |
| 600960 | 2016 | -0.65 | 0    | 0.305382 | 0.09325802 | 22.62476 | 0.032791 | 23.04 |

|        |      |       |      |          |            |          |          |       |
|--------|------|-------|------|----------|------------|----------|----------|-------|
| 600448 | 2016 | 0.714 | 0    | 0.305382 | 0.09325802 | 21.73204 | 0.012136 | 15.31 |
| 600448 | 2016 | 0.714 | 0    | 0.305382 | 0.09325802 | 21.72516 | 0.012136 | 15.31 |
| 600960 | 2016 | -0.12 | 0    | 0.305382 | 0.09325802 | 22.62476 | 0.032791 | 23.04 |
| 639    | 2016 | -0.35 | 0    | 0.305382 | 0.09325802 | 22.84387 | 0.050691 | 35    |
| 639    | 2016 | -0.35 | 0    | 0.305382 | 0.09325802 | 21.81498 | 0.050691 | 35    |
| 600448 | 2016 | 0.714 | 0    | 0.305382 | 0.09325802 | 21.72516 | 0.012136 | 15.31 |
| 600069 | 2016 | -0.81 | 0.03 | 0.353478 | 0.12494637 | 22.26193 | -0.22026 | 47.35 |
| 895    | 2016 | -0.96 | 0.03 | 0.353478 | 0.12494637 | 23.78441 | 0.302158 | 59.27 |
| 895    | 2016 | -0.96 | 0.03 | 0.353478 | 0.12494637 | 23.58294 | 0.302158 | 59.27 |
| 600069 | 2016 | -0.7  | 0.03 | 0.353478 | 0.12494637 | 22.26193 | -0.22026 | 47.35 |
| 895    | 2016 | -0.96 | 0.03 | 0.353478 | 0.12494637 | 23.78441 | 0.302158 | 59.27 |
| 895    | 2016 | -0.96 | 0.03 | 0.353478 | 0.12494637 | 23.78441 | 0.302158 | 59.27 |
| 895    | 2016 | -0.94 | 0.03 | 0.353478 | 0.12494637 | 23.78441 | 0.302158 | 59.27 |
| 600069 | 2016 | -0.33 | 0.03 | 0.353478 | 0.12494637 | 22.26193 | -0.22026 | 47.35 |
| 600069 | 2016 | -0.81 | 0.03 | 0.353478 | 0.12494637 | 22.26193 | -0.22026 | 47.35 |
| 600069 | 2016 | -0.33 | 0.03 | 0.353478 | 0.12494637 | 22.26193 | -0.22026 | 47.35 |
| 895    | 2016 | -0.96 | 0.03 | 0.353478 | 0.12494637 | 23.78441 | 0.302158 | 59.27 |
| 895    | 2016 | -0.96 | 0.03 | 0.353478 | 0.12494637 | 23.78441 | 0.302158 | 59.27 |
| 600069 | 2016 | -0.33 | 0.03 | 0.353478 | 0.12494637 | 22.32637 | -0.22026 | 47.35 |
| 895    | 2016 | -0.94 | 0.03 | 0.353478 | 0.12494637 | 23.78441 | 0.302158 | 59.27 |
| 895    | 2016 | -0.96 | 0.03 | 0.353478 | 0.12494637 | 23.78441 | 0.302158 | 59.27 |
| 895    | 2016 | -0.94 | 0.03 | 0.353478 | 0.12494637 | 23.78441 | 0.302158 | 59.27 |
| 600436 | 2016 | -0.56 | 0.04 | 0.096004 | 0.00921669 | 22.34024 | 0.135124 | 57.92 |
| 600592 | 2016 | 0.188 | 0.04 | 0.096004 | 0.00921669 | 21.6857  | 0.027993 | 37.85 |
| 600436 | 2016 | -0.52 | 0.04 | 0.096004 | 0.00921669 | 22.34024 | 0.135124 | 57.92 |
| 600436 | 2016 | -0.56 | 0.04 | 0.096004 | 0.00921669 | 22.08819 | 0.135124 | 57.92 |
| 600436 | 2016 | -0.52 | 0.04 | 0.096004 | 0.00921669 | 22.34024 | 0.135124 | 57.92 |
| 600592 | 2016 | 0.234 | 0.04 | 0.096004 | 0.00921669 | 21.61698 | 0.027993 | 37.85 |
| 600592 | 2016 | 0.234 | 0.04 | 0.096004 | 0.00921669 | 21.6857  | 0.027993 | 37.85 |
| 600592 | 2016 | 0.188 | 0.04 | 0.096004 | 0.00921669 | 21.6857  | 0.027993 | 37.85 |
| 600436 | 2016 | 0.046 | 0.04 | 0.096004 | 0.00921669 | 22.34024 | 0.135124 | 57.92 |
| 600436 | 2016 | 0.046 | 0.04 | 0.096004 | 0.00921669 | 22.34024 | 0.135124 | 57.92 |
| 600436 | 2016 | -0.56 | 0.04 | 0.096004 | 0.00921669 | 22.34024 | 0.135124 | 57.92 |
| 600436 | 2016 | -0.56 | 0.04 | 0.096004 | 0.00921669 | 22.34024 | 0.135124 | 57.92 |
| 600592 | 2016 | 0.188 | 0.04 | 0.096004 | 0.00921669 | 21.6857  | 0.027993 | 37.85 |
| 600592 | 2016 | 0.108 | 0.04 | 0.096004 | 0.00921669 | 21.6857  | 0.027993 | 37.85 |
| 600592 | 2016 | 0.108 | 0.04 | 0.096004 | 0.00921669 | 21.6857  | 0.027993 | 37.85 |
| 600436 | 2016 | -0.36 | 0.04 | 0.096004 | 0.00921669 | 22.34024 | 0.135124 | 57.92 |
| 600568 | 2016 | -0.59 | 0.05 | 1.394296 | 1.9440621  | 22.68863 | 0.048683 | 29.52 |
| 2365   | 2016 | 0.088 | 0.05 | 1.394296 | 1.9440621  | 20.96489 | 0.052662 | 22.63 |
| 600568 | 2016 | -0.59 | 0.05 | 1.394296 | 1.9440621  | 22.68863 | 0.048683 | 29.52 |
| 2365   | 2016 | 0.088 | 0.05 | 1.394296 | 1.9440621  | 20.96489 | 0.052662 | 22.63 |
| 2365   | 2016 | 0.088 | 0.05 | 1.394296 | 1.9440621  | 20.99077 | 0.052662 | 22.63 |
| 600568 | 2016 | -0.59 | 0.05 | 1.394296 | 1.9440621  | 22.68863 | 0.048683 | 29.52 |
| 600568 | 2016 | -0.59 | 0.05 | 1.394296 | 1.9440621  | 22.68863 | 0.048683 | 29.52 |
| 600568 | 2016 | -0.59 | 0.05 | 1.394296 | 1.9440621  | 22.68863 | 0.048683 | 29.52 |
| 600568 | 2016 | -0.59 | 0.05 | 1.394296 | 1.9440621  | 22.54259 | 0.048683 | 29.52 |
| 2365   | 2016 | 0.088 | 0.05 | 1.394296 | 1.9440621  | 20.96489 | 0.052662 | 22.63 |
| 2365   | 2016 | 0.088 | 0.05 | 1.394296 | 1.9440621  | 20.96489 | 0.052662 | 22.63 |
| 600568 | 2016 | -0.59 | 0.05 | 1.394296 | 1.9440621  | 22.68863 | 0.048683 | 29.52 |
| 603838 | 2016 | -0.56 | 0.05 | 0.255934 | 0.06550202 | 20.47765 | 0.089798 | 9.65  |
| 300408 | 2016 | 0.068 | 0.05 | 0.255934 | 0.06550202 | 22.4954  | 0.20604  | 37.35 |
| 603838 | 2016 | -0.56 | 0.05 | 0.255934 | 0.06550202 | 20.47765 | 0.089798 | 9.65  |
| 603268 | 2016 | -0.75 | 0.05 | 0.255934 | 0.06550202 | 20.58453 | 0.067371 | 29.5  |

|        |      |       |      |          |            |          |          |       |
|--------|------|-------|------|----------|------------|----------|----------|-------|
| 603268 | 2016 | -0.75 | 0.05 | 0.255934 | 0.06550202 | 20.58453 | 0.067371 | 29.5  |
| 300089 | 2016 | -0.19 | 0.05 | 0.255934 | 0.06550202 | 21.62133 | 0.077755 | 32.99 |
| 300408 | 2016 | 0.621 | 0.05 | 0.255934 | 0.06550202 | 22.4954  | 0.20604  | 37.35 |
| 300408 | 2016 | 0.035 | 0.05 | 0.255934 | 0.06550202 | 22.4954  | 0.20604  | 37.35 |
| 603268 | 2016 | -0.75 | 0.05 | 0.255934 | 0.06550202 | 20.58453 | 0.067371 | 29.5  |
| 300089 | 2016 | -0.45 | 0.05 | 0.255934 | 0.06550202 | 21.62133 | 0.077755 | 32.99 |
| 603838 | 2016 | -0.56 | 0.05 | 0.255934 | 0.06550202 | 20.47765 | 0.089798 | 9.65  |
| 603838 | 2016 | -0.56 | 0.05 | 0.255934 | 0.06550202 | 20.47765 | 0.089798 | 9.65  |
| 603268 | 2016 | -0.75 | 0.05 | 0.255934 | 0.06550202 | 20.58453 | 0.067371 | 29.5  |
| 300089 | 2016 | 0.753 | 0.05 | 0.255934 | 0.06550202 | 21.62133 | 0.077755 | 32.99 |
| 300408 | 2016 | 0.035 | 0.05 | 0.255934 | 0.06550202 | 22.44222 | 0.20604  | 37.35 |
| 300408 | 2016 | 0.621 | 0.05 | 0.255934 | 0.06550202 | 22.4954  | 0.20604  | 37.35 |
| 300089 | 2016 | 0.753 | 0.05 | 0.255934 | 0.06550202 | 21.62133 | 0.077755 | 32.99 |
| 300089 | 2016 | -0.45 | 0.05 | 0.255934 | 0.06550202 | 21.62133 | 0.077755 | 32.99 |
| 603268 | 2016 | -0.75 | 0.05 | 0.255934 | 0.06550202 | 20.58453 | 0.067371 | 29.5  |
| 603268 | 2016 | -0.75 | 0.05 | 0.255934 | 0.06550202 | 20.42849 | 0.067371 | 29.5  |
| 300089 | 2016 | -0.57 | 0.05 | 0.255934 | 0.06550202 | 21.62133 | 0.077755 | 32.99 |
| 603838 | 2016 | -0.56 | 0.05 | 0.255934 | 0.06550202 | 20.44977 | 0.089798 | 9.65  |
| 300089 | 2016 | -0.19 | 0.05 | 0.255934 | 0.06550202 | 21.60387 | 0.077755 | 32.99 |
| 300089 | 2016 | 0.753 | 0.05 | 0.255934 | 0.06550202 | 21.62133 | 0.077755 | 32.99 |
| 2225   | 2016 | -0.54 | 0.03 | 0.363289 | 0.1319787  | 22.26654 | -0.07267 | 16.29 |
| 2225   | 2016 | -0.54 | 0.03 | 0.363289 | 0.1319787  | 22.13781 | -0.07267 | 16.29 |
| 2225   | 2016 | 0.345 | 0.03 | 0.363289 | 0.1319787  | 22.26654 | -0.07267 | 16.29 |
| 2225   | 2016 | -0.54 | 0.03 | 0.363289 | 0.1319787  | 22.26654 | -0.07267 | 16.29 |
| 2225   | 2016 | -0.54 | 0.03 | 0.363289 | 0.1319787  | 22.26654 | -0.07267 | 16.29 |
| 2225   | 2016 | -0.24 | 0.03 | 0.363289 | 0.1319787  | 22.26654 | -0.07267 | 16.29 |
| 2225   | 2016 | -0.54 | 0.03 | 0.363289 | 0.1319787  | 22.26654 | -0.07267 | 16.29 |
| 2225   | 2016 | -0.54 | 0.03 | 0.363289 | 0.1319787  | 22.26654 | -0.07267 | 16.29 |
| 2225   | 2016 | -0.54 | 0.03 | 0.363289 | 0.1319787  | 22.26654 | -0.07267 | 16.29 |
| 2225   | 2016 | -0.54 | 0.03 | 0.363289 | 0.1319787  | 22.26654 | -0.07267 | 16.29 |
| 2225   | 2016 | -0.54 | 0.03 | 0.363289 | 0.1319787  | 22.26654 | -0.07267 | 16.29 |
| 2225   | 2016 | -0.33 | 0.03 | 0.363289 | 0.1319787  | 22.26654 | -0.07267 | 16.29 |
| 811    | 2016 | 0.252 | 0    | 1.100178 | 1.210391   | 22.38648 | 0.133492 | 29.15 |
| 300308 | 2016 | 0.099 | 0    | 1.100178 | 1.210391   | 20.26464 | 0.01809  | 46.01 |
| 2481   | 2016 | 0.324 | 0    | 1.100178 | 1.210391   | 22.05281 | 0.019419 | 32.94 |
| 2353   | 2016 | 0.098 | 0    | 1.100178 | 1.210391   | 23.0317  | 0.014867 | 22.46 |
| 2643   | 2016 | 0.69  | 0    | 1.100178 | 1.210391   | 22.18186 | 0.082614 | 20.54 |
| 300224 | 2016 | 0.492 | 0    | 1.100178 | 1.210391   | 21.88851 | 0.083532 | 53.18 |
| 600309 | 2016 | 0.216 | 0    | 1.100178 | 1.210391   | 24.65047 | 0.248068 | 50.5  |
| 2353   | 2016 | 0.052 | 0    | 1.100178 | 1.210391   | 23.0317  | 0.014867 | 22.46 |
| 2353   | 2016 | 0.052 | 0    | 1.100178 | 1.210391   | 23.0317  | 0.014867 | 22.46 |
| 682    | 2016 | 0.658 | 0    | 1.100178 | 1.210391   | 21.94906 | 0.07315  | 19.74 |
| 682    | 2016 | 0.966 | 0    | 1.100178 | 1.210391   | 21.94906 | 0.07315  | 19.74 |
| 2363   | 2016 | -0.38 | 0    | 1.100178 | 1.210391   | 21.6824  | 0.03043  | 45.55 |
| 811    | 2016 | -0.07 | 0    | 1.100178 | 1.210391   | 22.38648 | 0.133492 | 29.15 |
| 300175 | 2016 | -0.94 | 0    | 1.100178 | 1.210391   | 20.92842 | 0.048477 | 22.46 |
| 2355   | 2016 | -0.56 | 0    | 1.100178 | 1.210391   | 22.06686 | 0.039104 | 33.84 |
| 300175 | 2016 | -0.94 | 0    | 1.100178 | 1.210391   | 20.90631 | 0.048477 | 22.46 |
| 2374   | 2016 | -0.75 | 0    | 1.100178 | 1.210391   | 22.38728 | 0.049964 | 13.34 |
| 300423 | 2016 | -0.26 | 0    | 1.100178 | 1.210391   | 20.24324 | 0.054107 | 45.6  |
| 682    | 2016 | 0.451 | 0    | 1.100178 | 1.210391   | 21.94906 | 0.07315  | 19.74 |
| 600219 | 2016 | 0.076 | 0    | 1.100178 | 1.210391   | 24.47713 | 0.040102 | 23.38 |
| 600309 | 2016 | 0.6   | 0    | 1.100178 | 1.210391   | 24.65047 | 0.248068 | 50.5  |
| 300308 | 2016 | -0.21 | 0    | 1.100178 | 1.210391   | 20.26464 | 0.01809  | 46.01 |
| 2726   | 2016 | 0.337 | 0    | 1.100178 | 1.210391   | 21.55578 | 0.126945 | 45.96 |

|        |      |       |   |          |          |          |          |       |
|--------|------|-------|---|----------|----------|----------|----------|-------|
| 2353   | 2016 | 0.052 | 0 | 1.100178 | 1.210391 | 23.0317  | 0.014867 | 22.46 |
| 2353   | 2016 | 0.052 | 0 | 1.100178 | 1.210391 | 23.0317  | 0.014867 | 22.46 |
| 300224 | 2016 | 0.199 | 0 | 1.100178 | 1.210391 | 21.88851 | 0.083532 | 53.18 |
| 2355   | 2016 | -0.56 | 0 | 1.100178 | 1.210391 | 22.06686 | 0.039104 | 33.84 |
| 600219 | 2016 | 0.096 | 0 | 1.100178 | 1.210391 | 24.47713 | 0.040102 | 23.38 |
| 2254   | 2016 | 0.059 | 0 | 1.100178 | 1.210391 | 21.61493 | 0.02957  | 35.5  |
| 2355   | 2016 | -0.56 | 0 | 1.100178 | 1.210391 | 22.10245 | 0.039104 | 33.84 |
| 2458   | 2016 | 0.392 | 0 | 1.100178 | 1.210391 | 21.38444 | 0.302158 | 47.87 |
| 2353   | 2016 | -0.16 | 0 | 1.100178 | 1.210391 | 23.0317  | 0.014867 | 22.46 |
| 300105 | 2016 | 0.472 | 0 | 1.100178 | 1.210391 | 21.65934 | -0.09047 | 23.25 |
| 300308 | 2016 | 0.033 | 0 | 1.100178 | 1.210391 | 20.26464 | 0.01809  | 46.01 |
| 2355   | 2016 | -0.56 | 0 | 1.100178 | 1.210391 | 22.10245 | 0.039104 | 33.84 |
| 600219 | 2016 | -0    | 0 | 1.100178 | 1.210391 | 24.47713 | 0.040102 | 23.38 |
| 300423 | 2016 | -0.26 | 0 | 1.100178 | 1.210391 | 20.24324 | 0.054107 | 45.6  |
| 600219 | 2016 | -0    | 0 | 1.100178 | 1.210391 | 24.282   | 0.040102 | 23.38 |
| 2355   | 2016 | 0.571 | 0 | 1.100178 | 1.210391 | 22.10245 | 0.039104 | 33.84 |
| 2353   | 2016 | 0.063 | 0 | 1.100178 | 1.210391 | 23.0317  | 0.014867 | 22.46 |
| 600219 | 2016 | 0.096 | 0 | 1.100178 | 1.210391 | 24.47713 | 0.040102 | 23.38 |
| 2237   | 2016 | -0.41 | 0 | 1.100178 | 1.210391 | 23.3099  | 0.053327 | 35.87 |
| 811    | 2016 | -0.14 | 0 | 1.100178 | 1.210391 | 22.38648 | 0.133492 | 29.15 |
| 2353   | 2016 | 0.052 | 0 | 1.100178 | 1.210391 | 23.0317  | 0.014867 | 22.46 |
| 2726   | 2016 | -0.33 | 0 | 1.100178 | 1.210391 | 21.55578 | 0.126945 | 45.96 |
| 2254   | 2016 | 0.059 | 0 | 1.100178 | 1.210391 | 21.67824 | 0.02957  | 35.5  |
| 2353   | 2016 | -0.27 | 0 | 1.100178 | 1.210391 | 23.0317  | 0.014867 | 22.46 |
| 300224 | 2016 | 0.492 | 0 | 1.100178 | 1.210391 | 21.88851 | 0.083532 | 53.18 |
| 811    | 2016 | -0.07 | 0 | 1.100178 | 1.210391 | 22.38648 | 0.133492 | 29.15 |
| 300423 | 2016 | -0.26 | 0 | 1.100178 | 1.210391 | 20.24324 | 0.054107 | 45.6  |
| 2458   | 2016 | 0.392 | 0 | 1.100178 | 1.210391 | 21.38444 | 0.302158 | 47.87 |
| 2726   | 2016 | 0.337 | 0 | 1.100178 | 1.210391 | 21.55578 | 0.126945 | 45.96 |
| 2254   | 2016 | 0.059 | 0 | 1.100178 | 1.210391 | 21.67824 | 0.02957  | 35.5  |
| 300105 | 2016 | 0.568 | 0 | 1.100178 | 1.210391 | 21.6497  | -0.09047 | 23.25 |
| 2374   | 2016 | -0.66 | 0 | 1.100178 | 1.210391 | 22.38728 | 0.049964 | 13.34 |
| 2643   | 2016 | 0.803 | 0 | 1.100178 | 1.210391 | 22.18186 | 0.082614 | 20.54 |
| 2353   | 2016 | -0.06 | 0 | 1.100178 | 1.210391 | 23.0317  | 0.014867 | 22.46 |
| 2353   | 2016 | -0.1  | 0 | 1.100178 | 1.210391 | 23.0317  | 0.014867 | 22.46 |
| 300224 | 2016 | 0.338 | 0 | 1.100178 | 1.210391 | 21.88851 | 0.083532 | 53.18 |
| 2237   | 2016 | -0.41 | 0 | 1.100178 | 1.210391 | 23.2825  | 0.053327 | 35.87 |
| 2458   | 2016 | 0.392 | 0 | 1.100178 | 1.210391 | 21.37884 | 0.302158 | 47.87 |
| 2353   | 2016 | -0.27 | 0 | 1.100178 | 1.210391 | 23.0317  | 0.014867 | 22.46 |
| 300308 | 2016 | -0.21 | 0 | 1.100178 | 1.210391 | 20.26464 | 0.01809  | 46.01 |
| 603223 | 2016 | -0.98 | 0 | 1.100178 | 1.210391 | 20.28242 | 0.10166  | 34.17 |
| 2374   | 2016 | -0.64 | 0 | 1.100178 | 1.210391 | 22.38728 | 0.049964 | 13.34 |
| 682    | 2016 | 0.4   | 0 | 1.100178 | 1.210391 | 21.94906 | 0.07315  | 19.74 |
| 682    | 2016 | 0.658 | 0 | 1.100178 | 1.210391 | 21.94906 | 0.07315  | 19.74 |
| 300175 | 2016 | -0.94 | 0 | 1.100178 | 1.210391 | 20.92842 | 0.048477 | 22.46 |
| 811    | 2016 | 0.157 | 0 | 1.100178 | 1.210391 | 22.38648 | 0.133492 | 29.15 |
| 300224 | 2016 | 0.338 | 0 | 1.100178 | 1.210391 | 21.88851 | 0.083532 | 53.18 |
| 682    | 2016 | 0.966 | 0 | 1.100178 | 1.210391 | 21.94906 | 0.07315  | 19.74 |
| 300105 | 2016 | 0.539 | 0 | 1.100178 | 1.210391 | 21.65934 | -0.09047 | 23.25 |
| 811    | 2016 | 0.29  | 0 | 1.100178 | 1.210391 | 21.96414 | 0.133492 | 29.15 |
| 2374   | 2016 | -0.75 | 0 | 1.100178 | 1.210391 | 22.03301 | 0.049964 | 13.34 |
| 300105 | 2016 | 0.191 | 0 | 1.100178 | 1.210391 | 21.65934 | -0.09047 | 23.25 |
| 300105 | 2016 | 0.437 | 0 | 1.100178 | 1.210391 | 21.65934 | -0.09047 | 23.25 |
| 2254   | 2016 | 9E-04 | 0 | 1.100178 | 1.210391 | 21.67824 | 0.02957  | 35.5  |

|        |      |       |   |          |          |          |          |       |
|--------|------|-------|---|----------|----------|----------|----------|-------|
| 682    | 2016 | 0.375 | 0 | 1.100178 | 1.210391 | 21.94906 | 0.07315  | 19.74 |
| 2254   | 2016 | 0.059 | 0 | 1.100178 | 1.210391 | 21.67824 | 0.02957  | 35.5  |
| 600309 | 2016 | 0.6   | 0 | 1.100178 | 1.210391 | 24.18844 | 0.248068 | 50.5  |
| 682    | 2016 | -0.24 | 0 | 1.100178 | 1.210391 | 21.42732 | 0.07315  | 19.74 |
| 300105 | 2016 | 0.568 | 0 | 1.100178 | 1.210391 | 21.65934 | -0.09047 | 23.25 |
| 2355   | 2016 | -0.56 | 0 | 1.100178 | 1.210391 | 22.10245 | 0.039104 | 33.84 |
| 2675   | 2016 | 0.368 | 0 | 1.100178 | 1.210391 | 22.1744  | 0.064953 | 19.62 |
| 811    | 2016 | -0.07 | 0 | 1.100178 | 1.210391 | 22.38648 | 0.133492 | 29.15 |
| 2355   | 2016 | 0.269 | 0 | 1.100178 | 1.210391 | 22.10245 | 0.039104 | 33.84 |
| 2481   | 2016 | 0.324 | 0 | 1.100178 | 1.210391 | 22.21342 | 0.019419 | 32.94 |
| 2675   | 2016 | 0.81  | 0 | 1.100178 | 1.210391 | 22.1744  | 0.064953 | 19.62 |
| 600309 | 2016 | 0.674 | 0 | 1.100178 | 1.210391 | 24.65047 | 0.248068 | 50.5  |
| 2355   | 2016 | 0.131 | 0 | 1.100178 | 1.210391 | 22.10245 | 0.039104 | 33.84 |
| 682    | 2016 | 0.966 | 0 | 1.100178 | 1.210391 | 21.94906 | 0.07315  | 19.74 |
| 2254   | 2016 | 0.059 | 0 | 1.100178 | 1.210391 | 21.67824 | 0.02957  | 35.5  |
| 2643   | 2016 | 0.735 | 0 | 1.100178 | 1.210391 | 22.18186 | 0.082614 | 20.54 |
| 600309 | 2016 | 0.417 | 0 | 1.100178 | 1.210391 | 24.65047 | 0.248068 | 50.5  |
| 2675   | 2016 | 0.368 | 0 | 1.100178 | 1.210391 | 22.1744  | 0.064953 | 19.62 |
| 2237   | 2016 | 0.42  | 0 | 1.100178 | 1.210391 | 23.3099  | 0.053327 | 35.87 |
| 2254   | 2016 | 0.059 | 0 | 1.100178 | 1.210391 | 21.67824 | 0.02957  | 35.5  |
| 2041   | 2016 | 0.754 | 0 | 1.100178 | 1.210391 | 22.22009 | 0.142738 | 53.18 |
| 2041   | 2016 | -0.13 | 0 | 1.100178 | 1.210391 | 22.22009 | 0.142738 | 53.18 |
| 600309 | 2016 | 0.674 | 0 | 1.100178 | 1.210391 | 24.65047 | 0.248068 | 50.5  |
| 2237   | 2016 | 0.42  | 0 | 1.100178 | 1.210391 | 23.3099  | 0.053327 | 35.87 |
| 811    | 2016 | -0.07 | 0 | 1.100178 | 1.210391 | 22.38648 | 0.133492 | 29.15 |
| 2363   | 2016 | -0.38 | 0 | 1.100178 | 1.210391 | 21.71726 | 0.03043  | 45.55 |
| 811    | 2016 | -0.09 | 0 | 1.100178 | 1.210391 | 22.38648 | 0.133492 | 29.15 |
| 811    | 2016 | -0.21 | 0 | 1.100178 | 1.210391 | 22.38648 | 0.133492 | 29.15 |
| 2353   | 2016 | -0.06 | 0 | 1.100178 | 1.210391 | 22.75214 | 0.014867 | 22.46 |
| 2643   | 2016 | 0.613 | 0 | 1.100178 | 1.210391 | 22.18186 | 0.082614 | 20.54 |
| 2363   | 2016 | -0.38 | 0 | 1.100178 | 1.210391 | 21.71726 | 0.03043  | 45.55 |
| 811    | 2016 | -0.07 | 0 | 1.100178 | 1.210391 | 22.38648 | 0.133492 | 29.15 |
| 300224 | 2016 | 0.199 | 0 | 1.100178 | 1.210391 | 21.68736 | 0.083532 | 53.18 |
| 682    | 2016 | 0.51  | 0 | 1.100178 | 1.210391 | 21.94906 | 0.07315  | 19.74 |
| 2675   | 2016 | -0.29 | 0 | 1.100178 | 1.210391 | 22.1744  | 0.064953 | 19.62 |
| 2726   | 2016 | -0.99 | 0 | 1.100178 | 1.210391 | 21.55578 | 0.126945 | 45.96 |
| 2041   | 2016 | 0.754 | 0 | 1.100178 | 1.210391 | 22.22009 | 0.142738 | 53.18 |
| 2041   | 2016 | 0.091 | 0 | 1.100178 | 1.210391 | 22.22009 | 0.142738 | 53.18 |
| 600309 | 2016 | 0.674 | 0 | 1.100178 | 1.210391 | 24.65047 | 0.248068 | 50.5  |
| 2374   | 2016 | -0.42 | 0 | 1.100178 | 1.210391 | 22.38728 | 0.049964 | 13.34 |
| 2237   | 2016 | -0.1  | 0 | 1.100178 | 1.210391 | 23.3099  | 0.053327 | 35.87 |
| 2254   | 2016 | 9E-04 | 0 | 1.100178 | 1.210391 | 21.67824 | 0.02957  | 35.5  |
| 2374   | 2016 | -0.55 | 0 | 1.100178 | 1.210391 | 22.38728 | 0.049964 | 13.34 |
| 2353   | 2016 | 0.052 | 0 | 1.100178 | 1.210391 | 23.0317  | 0.014867 | 22.46 |
| 300224 | 2016 | 0.257 | 0 | 1.100178 | 1.210391 | 21.88851 | 0.083532 | 53.18 |
| 2355   | 2016 | 0.097 | 0 | 1.100178 | 1.210391 | 22.10245 | 0.039104 | 33.84 |
| 2481   | 2016 | 0.324 | 0 | 1.100178 | 1.210391 | 22.21342 | 0.019419 | 32.94 |
| 2254   | 2016 | 0.014 | 0 | 1.100178 | 1.210391 | 21.67824 | 0.02957  | 35.5  |
| 603223 | 2016 | -0.98 | 0 | 1.100178 | 1.210391 | 20.61399 | 0.10166  | 34.17 |
| 2643   | 2016 | 0.842 | 0 | 1.100178 | 1.210391 | 22.18186 | 0.082614 | 20.54 |
| 600309 | 2016 | 0.674 | 0 | 1.100178 | 1.210391 | 24.65047 | 0.248068 | 50.5  |
| 2726   | 2016 | -0.99 | 0 | 1.100178 | 1.210391 | 21.19004 | 0.126945 | 45.96 |
| 2041   | 2016 | -0.13 | 0 | 1.100178 | 1.210391 | 21.51103 | 0.142738 | 53.18 |
| 2643   | 2016 | 0.797 | 0 | 1.100178 | 1.210391 | 22.18186 | 0.082614 | 20.54 |

|        |      |       |      |          |           |          |          |       |
|--------|------|-------|------|----------|-----------|----------|----------|-------|
| 603223 | 2016 | -0.98 | 0    | 1.100178 | 1.210391  | 20.61399 | 0.10166  | 34.17 |
| 300308 | 2016 | 0.121 | 0    | 1.100178 | 1.210391  | 20.26464 | 0.01809  | 46.01 |
| 2643   | 2016 | 0.69  | 0    | 1.100178 | 1.210391  | 22.18186 | 0.082614 | 20.54 |
| 600219 | 2016 | -0    | 0    | 1.100178 | 1.210391  | 24.47713 | 0.040102 | 23.38 |
| 2643   | 2016 | 0.797 | 0    | 1.100178 | 1.210391  | 22.18186 | 0.082614 | 20.54 |
| 600309 | 2016 | 0.581 | 0    | 1.100178 | 1.210391  | 24.65047 | 0.248068 | 50.5  |
| 2675   | 2016 | -0.02 | 0    | 1.100178 | 1.210391  | 22.1744  | 0.064953 | 19.62 |
| 811    | 2016 | -0.18 | 0    | 1.100178 | 1.210391  | 22.38648 | 0.133492 | 29.15 |
| 2643   | 2016 | 0.797 | 0    | 1.100178 | 1.210391  | 22.13226 | 0.082614 | 20.54 |
| 2374   | 2016 | -0.66 | 0    | 1.100178 | 1.210391  | 22.38728 | 0.049964 | 13.34 |
| 2675   | 2016 | 0.81  | 0    | 1.100178 | 1.210391  | 21.8105  | 0.064953 | 19.62 |
| 811    | 2016 | -0.07 | 0    | 1.100178 | 1.210391  | 22.38648 | 0.133492 | 29.15 |
| 600309 | 2016 | 0.445 | 0    | 1.100178 | 1.210391  | 24.65047 | 0.248068 | 50.5  |
| 600219 | 2016 | -0    | 0    | 1.100178 | 1.210391  | 24.47713 | 0.040102 | 23.38 |
| 300308 | 2016 | 0.122 | 0    | 1.100178 | 1.210391  | 20.26464 | 0.01809  | 46.01 |
| 2254   | 2016 | 0.059 | 0    | 1.100178 | 1.210391  | 21.67824 | 0.02957  | 35.5  |
| 682    | 2016 | 0.203 | 0    | 1.100178 | 1.210391  | 21.94906 | 0.07315  | 19.74 |
| 2675   | 2016 | 0.81  | 0    | 1.100178 | 1.210391  | 22.1744  | 0.064953 | 19.62 |
| 2448   | 2016 | 0.046 | 0.03 | 1.150057 | 1.3226312 | 21.73254 | 0.096425 | 18.34 |
| 2423   | 2016 | -0.24 | 0.03 | 1.150057 | 1.3226312 | 22.05122 | 0.002841 | 67.42 |
| 2407   | 2016 | -0.56 | 0.03 | 1.150057 | 1.3226312 | 22.38309 | 0.165225 | 13.93 |
| 300109 | 2016 | 0.943 | 0.03 | 1.150057 | 1.3226312 | 20.99322 | 0.065404 | 19.58 |
| 600469 | 2016 | -0.54 | 0.03 | 1.150057 | 1.3226312 | 22.76808 | 0.034492 | 42.58 |
| 600531 | 2016 | 0.381 | 0.03 | 1.150057 | 1.3226312 | 23.14633 | 0.058117 | 34.61 |
| 2601   | 2016 | 0.046 | 0.03 | 1.150057 | 1.3226312 | 23.41056 | 0.036048 | 20.5  |
| 600469 | 2016 | -0.48 | 0.03 | 1.150057 | 1.3226312 | 22.76808 | 0.034492 | 42.58 |
| 2407   | 2016 | -0.33 | 0.03 | 1.150057 | 1.3226312 | 22.38309 | 0.165225 | 13.93 |
| 2448   | 2016 | 0.046 | 0.03 | 1.150057 | 1.3226312 | 21.73254 | 0.096425 | 18.34 |
| 2448   | 2016 | -0.2  | 0.03 | 1.150057 | 1.3226312 | 21.73254 | 0.096425 | 18.34 |
| 300109 | 2016 | 0.943 | 0.03 | 1.150057 | 1.3226312 | 20.98038 | 0.065404 | 19.58 |
| 600531 | 2016 | -0.73 | 0.03 | 1.150057 | 1.3226312 | 23.14633 | 0.058117 | 34.61 |
| 2407   | 2016 | -0.56 | 0.03 | 1.150057 | 1.3226312 | 22.38309 | 0.165225 | 13.93 |
| 300109 | 2016 | 0.943 | 0.03 | 1.150057 | 1.3226312 | 20.99322 | 0.065404 | 19.58 |
| 2601   | 2016 | 0.037 | 0.03 | 1.150057 | 1.3226312 | 23.61633 | 0.036048 | 20.5  |
| 600469 | 2016 | -0.03 | 0.03 | 1.150057 | 1.3226312 | 22.76808 | 0.034492 | 42.58 |
| 600531 | 2016 | 0.094 | 0.03 | 1.150057 | 1.3226312 | 23.14633 | 0.058117 | 34.61 |
| 2407   | 2016 | -0.6  | 0.03 | 1.150057 | 1.3226312 | 22.38309 | 0.165225 | 13.93 |
| 2407   | 2016 | -0.19 | 0.03 | 1.150057 | 1.3226312 | 22.38309 | 0.165225 | 13.93 |
| 2601   | 2016 | -0    | 0.03 | 1.150057 | 1.3226312 | 23.61633 | 0.036048 | 20.5  |
| 600469 | 2016 | -0.57 | 0.03 | 1.150057 | 1.3226312 | 22.56844 | 0.034492 | 42.58 |
| 2407   | 2016 | -0.56 | 0.03 | 1.150057 | 1.3226312 | 22.38309 | 0.165225 | 13.93 |
| 2423   | 2016 | -0.24 | 0.03 | 1.150057 | 1.3226312 | 21.96054 | 0.002841 | 67.42 |
| 300109 | 2016 | 0.943 | 0.03 | 1.150057 | 1.3226312 | 20.99322 | 0.065404 | 19.58 |
| 2601   | 2016 | -0.29 | 0.03 | 1.150057 | 1.3226312 | 23.61633 | 0.036048 | 20.5  |
| 300109 | 2016 | 0.943 | 0.03 | 1.150057 | 1.3226312 | 20.99322 | 0.065404 | 19.58 |
| 2448   | 2016 | 0.147 | 0.03 | 1.150057 | 1.3226312 | 21.73254 | 0.096425 | 18.34 |
| 2601   | 2016 | -0.08 | 0.03 | 1.150057 | 1.3226312 | 23.61633 | 0.036048 | 20.5  |
| 600469 | 2016 | -0.57 | 0.03 | 1.150057 | 1.3226312 | 22.76808 | 0.034492 | 42.58 |
| 2601   | 2016 | -0.63 | 0.03 | 1.150057 | 1.3226312 | 23.61633 | 0.036048 | 20.5  |
| 2423   | 2016 | -0.24 | 0.03 | 1.150057 | 1.3226312 | 22.05122 | 0.002841 | 67.42 |
| 2407   | 2016 | -0.56 | 0.03 | 1.150057 | 1.3226312 | 22.38309 | 0.165225 | 13.93 |
| 2448   | 2016 | 0.711 | 0.03 | 1.150057 | 1.3226312 | 21.73254 | 0.096425 | 18.34 |
| 2448   | 2016 | 0.379 | 0.03 | 1.150057 | 1.3226312 | 21.71409 | 0.096425 | 18.34 |
| 2407   | 2016 | -0.19 | 0.03 | 1.150057 | 1.3226312 | 22.38309 | 0.165225 | 13.93 |

|        |      |       |      |          |           |          |          |       |
|--------|------|-------|------|----------|-----------|----------|----------|-------|
| 600531 | 2016 | -0.57 | 0.03 | 1.150057 | 1.3226312 | 23.12562 | 0.058117 | 34.61 |
| 600531 | 2016 | 0.094 | 0.03 | 1.150057 | 1.3226312 | 23.14633 | 0.058117 | 34.61 |
| 600531 | 2016 | -0.24 | 0.03 | 1.150057 | 1.3226312 | 23.14633 | 0.058117 | 34.61 |
| 2601   | 2016 | -0.63 | 0.03 | 1.150057 | 1.3226312 | 23.61633 | 0.036048 | 20.5  |
| 2407   | 2016 | -0.18 | 0.03 | 1.150057 | 1.3226312 | 22.38309 | 0.165225 | 13.93 |
| 300109 | 2016 | 0.943 | 0.03 | 1.150057 | 1.3226312 | 20.99322 | 0.065404 | 19.58 |
| 2601   | 2016 | -0.63 | 0.03 | 1.150057 | 1.3226312 | 23.61633 | 0.036048 | 20.5  |
| 600469 | 2016 | -0.37 | 0.03 | 1.150057 | 1.3226312 | 22.76808 | 0.034492 | 42.58 |
| 2407   | 2016 | -0.38 | 0.03 | 1.150057 | 1.3226312 | 22.20348 | 0.165225 | 13.93 |
| 2601   | 2016 | 0.518 | 0.03 | 1.150057 | 1.3226312 | 23.61633 | 0.036048 | 20.5  |
| 2423   | 2016 | -0.24 | 0.03 | 1.150057 | 1.3226312 | 22.05122 | 0.002841 | 67.42 |
| 2601   | 2016 | -0.63 | 0.03 | 1.150057 | 1.3226312 | 23.61633 | 0.036048 | 20.5  |
| 2448   | 2016 | 0.379 | 0.03 | 1.150057 | 1.3226312 | 21.73254 | 0.096425 | 18.34 |
| 600531 | 2016 | -0.57 | 0.03 | 1.150057 | 1.3226312 | 23.14633 | 0.058117 | 34.61 |
| 2423   | 2016 | -0.24 | 0.03 | 1.150057 | 1.3226312 | 22.05122 | 0.002841 | 67.42 |
| 2601   | 2016 | -0.36 | 0.03 | 1.150057 | 1.3226312 | 23.61633 | 0.036048 | 20.5  |
| 2448   | 2016 | 0.81  | 0.03 | 1.150057 | 1.3226312 | 21.73254 | 0.096425 | 18.34 |
| 600356 | 2016 | 0.425 | 0.02 | 1.730122 | 2.9933215 | 21.71745 | 0.0462   | 31.6  |
| 600356 | 2016 | 0.425 | 0.02 | 1.730122 | 2.9933215 | 21.72466 | 0.0462   | 31.6  |
| 600356 | 2016 | 0.425 | 0.02 | 1.730122 | 2.9933215 | 21.72466 | 0.0462   | 31.6  |
| 532    | 2016 | -0.24 | 0.05 | 1.707003 | 2.9138599 | 21.39439 | 0.066217 | 14.49 |
| 300273 | 2016 | 1.016 | 0.05 | 1.707003 | 2.9138599 | 22.24283 | 0.038862 | 20.01 |
| 2180   | 2016 | -0.09 | 0.05 | 1.707003 | 2.9138599 | 24.68746 | -0.06114 | 67.74 |
| 532    | 2016 | -0.43 | 0.05 | 1.707003 | 2.9138599 | 21.39439 | 0.066217 | 14.49 |
| 2063   | 2016 | 1.76  | 0.05 | 1.707003 | 2.9138599 | 21.56808 | 0.075984 | 11.42 |
| 2141   | 2016 | -0.47 | 0.05 | 1.707003 | 2.9138599 | 21.1048  | 0.0035   | 26.03 |
| 300246 | 2016 | 0.146 | 0.05 | 1.707003 | 2.9138599 | 20.34721 | 0.156072 | 33.53 |
| 2180   | 2016 | -0.04 | 0.05 | 1.707003 | 2.9138599 | 24.68746 | -0.06114 | 67.74 |
| 2141   | 2016 | -0.47 | 0.05 | 1.707003 | 2.9138599 | 21.1048  | 0.0035   | 26.03 |
| 300381 | 2016 | 0.872 | 0.05 | 1.707003 | 2.9138599 | 21.88948 | 0.070725 | 36.07 |
| 513    | 2016 | 0.049 | 0.05 | 1.707003 | 2.9138599 | 23.07742 | 0.116797 | 34.2  |
| 513    | 2016 | 0.736 | 0.05 | 1.707003 | 2.9138599 | 23.07742 | 0.116797 | 34.2  |
| 300381 | 2016 | 0.757 | 0.05 | 1.707003 | 2.9138599 | 21.88948 | 0.070725 | 36.07 |
| 2141   | 2016 | -0.47 | 0.05 | 1.707003 | 2.9138599 | 21.0484  | 0.0035   | 26.03 |
| 300053 | 2016 | 1.048 | 0.05 | 1.707003 | 2.9138599 | 21.65249 | 0.043076 | 18.37 |
| 300146 | 2016 | -0.57 | 0.05 | 1.707003 | 2.9138599 | 22.39631 | 0.107927 | 48.33 |
| 513    | 2016 | 0.478 | 0.05 | 1.707003 | 2.9138599 | 23.07742 | 0.116797 | 34.2  |
| 300053 | 2016 | 1.048 | 0.05 | 1.707003 | 2.9138599 | 21.42059 | 0.043076 | 18.37 |
| 2017   | 2016 | 0.783 | 0.05 | 1.707003 | 2.9138599 | 21.13832 | 0.094875 | 29.13 |
| 300246 | 2016 | 0.367 | 0.05 | 1.707003 | 2.9138599 | 20.10336 | 0.156072 | 33.53 |
| 2180   | 2016 | 0.739 | 0.05 | 1.707003 | 2.9138599 | 24.68746 | -0.06114 | 67.74 |
| 300246 | 2016 | 0.367 | 0.05 | 1.707003 | 2.9138599 | 20.34721 | 0.156072 | 33.53 |
| 300053 | 2016 | 1.048 | 0.05 | 1.707003 | 2.9138599 | 21.65249 | 0.043076 | 18.37 |
| 532    | 2016 | -0.43 | 0.05 | 1.707003 | 2.9138599 | 21.13481 | 0.066217 | 14.49 |
| 300458 | 2016 | 2.493 | 0.05 | 1.707003 | 2.9138599 | 21.63261 | 0.067972 | 9.2   |
| 2063   | 2016 | 1.76  | 0.05 | 1.707003 | 2.9138599 | 21.5687  | 0.075984 | 11.42 |
| 300381 | 2016 | 0.529 | 0.05 | 1.707003 | 2.9138599 | 21.51135 | 0.070725 | 36.07 |
| 513    | 2016 | 0.049 | 0.05 | 1.707003 | 2.9138599 | 22.81954 | 0.116797 | 34.2  |
| 300146 | 2016 | -0.1  | 0.05 | 1.707003 | 2.9138599 | 22.39631 | 0.107927 | 48.33 |
| 300381 | 2016 | 0.185 | 0.05 | 1.707003 | 2.9138599 | 21.88948 | 0.070725 | 36.07 |
| 300381 | 2016 | 0.872 | 0.05 | 1.707003 | 2.9138599 | 21.88948 | 0.070725 | 36.07 |
| 2180   | 2016 | 0.016 | 0.05 | 1.707003 | 2.9138599 | 24.68746 | -0.06114 | 67.74 |
| 300146 | 2016 | -0.57 | 0.05 | 1.707003 | 2.9138599 | 22.39631 | 0.107927 | 48.33 |
| 513    | 2016 | 0.736 | 0.05 | 1.707003 | 2.9138599 | 23.07742 | 0.116797 | 34.2  |

|        |      |       |      |          |           |          |          |       |
|--------|------|-------|------|----------|-----------|----------|----------|-------|
| 300050 | 2016 | -0.18 | 0.05 | 1.707003 | 2.9138599 | 21.60385 | 0.055768 | 24.13 |
| 300053 | 2016 | 1.048 | 0.05 | 1.707003 | 2.9138599 | 21.65249 | 0.043076 | 18.37 |
| 2063   | 2016 | 1.073 | 0.05 | 1.707003 | 2.9138599 | 21.56808 | 0.075984 | 11.42 |
| 300458 | 2016 | 2.493 | 0.05 | 1.707003 | 2.9138599 | 21.63261 | 0.067972 | 9.2   |
| 513    | 2016 | 0.478 | 0.05 | 1.707003 | 2.9138599 | 23.07742 | 0.116797 | 34.2  |
| 300053 | 2016 | 1.048 | 0.05 | 1.707003 | 2.9138599 | 21.65249 | 0.043076 | 18.37 |
| 513    | 2016 | 0.736 | 0.05 | 1.707003 | 2.9138599 | 23.07742 | 0.116797 | 34.2  |
| 513    | 2016 | 0.736 | 0.05 | 1.707003 | 2.9138599 | 23.07742 | 0.116797 | 34.2  |
| 300273 | 2016 | 1.016 | 0.05 | 1.707003 | 2.9138599 | 22.24283 | 0.038862 | 20.01 |
| 300273 | 2016 | 1.016 | 0.05 | 1.707003 | 2.9138599 | 22.24283 | 0.038862 | 20.01 |
| 513    | 2016 | 0.736 | 0.05 | 1.707003 | 2.9138599 | 23.07742 | 0.116797 | 34.2  |
| 532    | 2016 | -0.19 | 0.05 | 1.707003 | 2.9138599 | 21.39439 | 0.066217 | 14.49 |
| 300246 | 2016 | 0.323 | 0.05 | 1.707003 | 2.9138599 | 20.34721 | 0.156072 | 33.53 |
| 300246 | 2016 | -0.34 | 0.05 | 1.707003 | 2.9138599 | 20.34721 | 0.156072 | 33.53 |
| 2063   | 2016 | 1.341 | 0.05 | 1.707003 | 2.9138599 | 21.56808 | 0.075984 | 11.42 |
| 300246 | 2016 | 0.367 | 0.05 | 1.707003 | 2.9138599 | 20.34721 | 0.156072 | 33.53 |
| 2180   | 2016 | -0.21 | 0.05 | 1.707003 | 2.9138599 | 22.96994 | -0.06114 | 67.74 |
| 300458 | 2016 | 2.589 | 0.05 | 1.707003 | 2.9138599 | 21.51691 | 0.067972 | 9.2   |
| 513    | 2016 | 0.736 | 0.05 | 1.707003 | 2.9138599 | 23.07742 | 0.116797 | 34.2  |
| 513    | 2016 | 0.221 | 0.05 | 1.707003 | 2.9138599 | 23.07742 | 0.116797 | 34.2  |
| 300246 | 2016 | -0.07 | 0.05 | 1.707003 | 2.9138599 | 20.34721 | 0.156072 | 33.53 |
| 2141   | 2016 | -0.47 | 0.05 | 1.707003 | 2.9138599 | 21.1048  | 0.0035   | 26.03 |
| 2141   | 2016 | -0.47 | 0.05 | 1.707003 | 2.9138599 | 21.1048  | 0.0035   | 26.03 |
| 300458 | 2016 | 2.589 | 0.05 | 1.707003 | 2.9138599 | 21.63261 | 0.067972 | 9.2   |
| 2063   | 2016 | 0.631 | 0.05 | 1.707003 | 2.9138599 | 21.56808 | 0.075984 | 11.42 |
| 513    | 2016 | 0.736 | 0.05 | 1.707003 | 2.9138599 | 23.07742 | 0.116797 | 34.2  |
| 2017   | 2016 | 0.783 | 0.05 | 1.707003 | 2.9138599 | 21.18703 | 0.094875 | 29.13 |
| 300381 | 2016 | 0.185 | 0.05 | 1.707003 | 2.9138599 | 21.88948 | 0.070725 | 36.07 |
| 300458 | 2016 | 2.493 | 0.05 | 1.707003 | 2.9138599 | 21.63261 | 0.067972 | 9.2   |
| 300381 | 2016 | 0.872 | 0.05 | 1.707003 | 2.9138599 | 21.88948 | 0.070725 | 36.07 |
| 300050 | 2016 | -0.18 | 0.05 | 1.707003 | 2.9138599 | 21.63144 | 0.055768 | 24.13 |
| 532    | 2016 | -0.24 | 0.05 | 1.707003 | 2.9138599 | 21.39439 | 0.066217 | 14.49 |
| 300146 | 2016 | -0.01 | 0.05 | 1.707003 | 2.9138599 | 22.39631 | 0.107927 | 48.33 |
| 300050 | 2016 | -0.18 | 0.05 | 1.707003 | 2.9138599 | 21.63144 | 0.055768 | 24.13 |
| 300146 | 2016 | 0.094 | 0.05 | 1.707003 | 2.9138599 | 22.39631 | 0.107927 | 48.33 |
| 2180   | 2016 | -0.3  | 0.05 | 1.707003 | 2.9138599 | 24.68746 | -0.06114 | 67.74 |
| 300458 | 2016 | 2.567 | 0.05 | 1.707003 | 2.9138599 | 21.63261 | 0.067972 | 9.2   |
| 300053 | 2016 | 1.048 | 0.05 | 1.707003 | 2.9138599 | 21.65249 | 0.043076 | 18.37 |
| 300246 | 2016 | -0.34 | 0.05 | 1.707003 | 2.9138599 | 20.34721 | 0.156072 | 33.53 |
| 300053 | 2016 | 1.048 | 0.05 | 1.707003 | 2.9138599 | 21.65249 | 0.043076 | 18.37 |
| 300273 | 2016 | 1.016 | 0.05 | 1.707003 | 2.9138599 | 22.24283 | 0.038862 | 20.01 |
| 300050 | 2016 | -0.18 | 0.05 | 1.707003 | 2.9138599 | 21.63144 | 0.055768 | 24.13 |
| 300146 | 2016 | -0.57 | 0.05 | 1.707003 | 2.9138599 | 22.34821 | 0.107927 | 48.33 |
| 300381 | 2016 | 0.185 | 0.05 | 1.707003 | 2.9138599 | 21.88948 | 0.070725 | 36.07 |
| 300146 | 2016 | -0.1  | 0.05 | 1.707003 | 2.9138599 | 22.39631 | 0.107927 | 48.33 |
| 300273 | 2016 | 1.016 | 0.05 | 1.707003 | 2.9138599 | 21.84944 | 0.038862 | 20.01 |
| 300273 | 2016 | 1.016 | 0.05 | 1.707003 | 2.9138599 | 22.24283 | 0.038862 | 20.01 |
| 513    | 2016 | 0.073 | 0.05 | 1.707003 | 2.9138599 | 23.07742 | 0.116797 | 34.2  |
| 300050 | 2016 | -0.18 | 0.05 | 1.707003 | 2.9138599 | 21.63144 | 0.055768 | 24.13 |
| 513    | 2016 | 0.736 | 0.05 | 1.707003 | 2.9138599 | 23.07742 | 0.116797 | 34.2  |
| 2017   | 2016 | 0.783 | 0.05 | 1.707003 | 2.9138599 | 21.18703 | 0.094875 | 29.13 |
| 2141   | 2016 | -0.47 | 0.05 | 1.707003 | 2.9138599 | 21.1048  | 0.0035   | 26.03 |
| 300053 | 2016 | 1.048 | 0.05 | 1.707003 | 2.9138599 | 21.65249 | 0.043076 | 18.37 |
| 300273 | 2016 | 1.016 | 0.05 | 1.707003 | 2.9138599 | 22.24283 | 0.038862 | 20.01 |



|        |      |       |      |          |           |          |          |       |
|--------|------|-------|------|----------|-----------|----------|----------|-------|
| 532    | 2016 | -0.43 | 0.05 | 1.707003 | 2.9138599 | 21.39439 | 0.066217 | 14.49 |
| 513    | 2016 | 0.282 | 0.05 | 1.707003 | 2.9138599 | 23.07742 | 0.116797 | 34.2  |
| 513    | 2016 | -0.48 | 0.05 | 1.707003 | 2.9138599 | 23.07742 | 0.116797 | 34.2  |
| 513    | 2016 | 0.736 | 0.05 | 1.707003 | 2.9138599 | 23.07742 | 0.116797 | 34.2  |
| 300273 | 2016 | 1.016 | 0.05 | 1.707003 | 2.9138599 | 22.24283 | 0.038862 | 20.01 |
| 300050 | 2016 | -0.18 | 0.05 | 1.707003 | 2.9138599 | 21.63144 | 0.055768 | 24.13 |
| 2017   | 2016 | 0.783 | 0.05 | 1.707003 | 2.9138599 | 21.18703 | 0.094875 | 29.13 |
| 300246 | 2016 | 0.367 | 0.05 | 1.707003 | 2.9138599 | 20.34721 | 0.156072 | 33.53 |
| 300146 | 2016 | 0.094 | 0.05 | 1.707003 | 2.9138599 | 22.39631 | 0.107927 | 48.33 |
| 300146 | 2016 | 0.609 | 0.05 | 1.707003 | 2.9138599 | 22.39631 | 0.107927 | 48.33 |
| 300273 | 2016 | 1.016 | 0.05 | 1.707003 | 2.9138599 | 22.24283 | 0.038862 | 20.01 |
| 2141   | 2016 | -0.47 | 0.05 | 1.707003 | 2.9138599 | 21.1048  | 0.0035   | 26.03 |
| 300146 | 2016 | -0.57 | 0.05 | 1.707003 | 2.9138599 | 22.39631 | 0.107927 | 48.33 |
| 2180   | 2016 | 0.928 | 0.05 | 1.707003 | 2.9138599 | 24.68746 | -0.06114 | 67.74 |
| 2063   | 2016 | 0.852 | 0.05 | 1.707003 | 2.9138599 | 21.56808 | 0.075984 | 11.42 |
| 300050 | 2016 | -0.18 | 0.05 | 1.707003 | 2.9138599 | 21.63144 | 0.055768 | 24.13 |
| 300273 | 2016 | 1.016 | 0.05 | 1.707003 | 2.9138599 | 22.24283 | 0.038862 | 20.01 |
| 300381 | 2016 | 0.185 | 0.05 | 1.707003 | 2.9138599 | 21.88948 | 0.070725 | 36.07 |
| 300146 | 2016 | 0.451 | 0.05 | 1.707003 | 2.9138599 | 22.39631 | 0.107927 | 48.33 |
| 300381 | 2016 | 0.185 | 0.05 | 1.707003 | 2.9138599 | 21.88948 | 0.070725 | 36.07 |
| 300381 | 2016 | 0.185 | 0.05 | 1.707003 | 2.9138599 | 21.88948 | 0.070725 | 36.07 |
| 2180   | 2016 | -0.13 | 0.05 | 1.707003 | 2.9138599 | 24.68746 | -0.06114 | 67.74 |
| 2323   | 2016 | -0.47 | 0.01 | 1.435466 | 2.0605637 | 21.43634 | 0.302158 | 44.68 |
| 2530   | 2016 | -0.08 | 0.01 | 1.435466 | 2.0605637 | 22.17654 | 0.011909 | 19.75 |
| 600805 | 2016 | -0.34 | 0.01 | 1.435466 | 2.0605637 | 23.00792 | 0.019004 | 23.06 |
| 2530   | 2016 | -0.23 | 0.01 | 1.435466 | 2.0605637 | 22.17654 | 0.011909 | 19.75 |
| 2530   | 2016 | 0.133 | 0.01 | 1.435466 | 2.0605637 | 22.17654 | 0.011909 | 19.75 |
| 2323   | 2016 | -0.21 | 0.01 | 1.435466 | 2.0605637 | 22.02633 | 0.302158 | 44.68 |
| 600805 | 2016 | -0.62 | 0.01 | 1.435466 | 2.0605637 | 23.00792 | 0.019004 | 23.06 |
| 816    | 2016 | -0.43 | 0.01 | 1.435466 | 2.0605637 | 22.59101 | -0.04421 | 26.06 |
| 816    | 2016 | -0.43 | 0.01 | 1.435466 | 2.0605637 | 22.59101 | -0.04421 | 26.06 |
| 600805 | 2016 | 0.372 | 0.01 | 1.435466 | 2.0605637 | 23.00792 | 0.019004 | 23.06 |
| 2496   | 2016 | 0.659 | 0.01 | 1.435466 | 2.0605637 | 22.73269 | 0.043861 | 42.2  |
| 600805 | 2016 | -0.44 | 0.01 | 1.435466 | 2.0605637 | 23.00792 | 0.019004 | 23.06 |
| 2496   | 2016 | 0.694 | 0.01 | 1.435466 | 2.0605637 | 22.73269 | 0.043861 | 42.2  |
| 2530   | 2016 | 0.479 | 0.01 | 1.435466 | 2.0605637 | 22.17654 | 0.011909 | 19.75 |
| 2530   | 2016 | -0.03 | 0.01 | 1.435466 | 2.0605637 | 22.17654 | 0.011909 | 19.75 |
| 600805 | 2016 | -0.44 | 0.01 | 1.435466 | 2.0605637 | 23.00792 | 0.019004 | 23.06 |
| 2496   | 2016 | 0.008 | 0.01 | 1.435466 | 2.0605637 | 22.73269 | 0.043861 | 42.2  |
| 2323   | 2016 | -0.09 | 0.01 | 1.435466 | 2.0605637 | 21.43634 | 0.302158 | 44.68 |
| 816    | 2016 | -0.65 | 0.01 | 1.435466 | 2.0605637 | 22.59101 | -0.04421 | 26.06 |
| 2496   | 2016 | 0.694 | 0.01 | 1.435466 | 2.0605637 | 22.73269 | 0.043861 | 42.2  |
| 2530   | 2016 | 0.036 | 0.01 | 1.435466 | 2.0605637 | 22.17654 | 0.011909 | 19.75 |
| 2496   | 2016 | 0.659 | 0.01 | 1.435466 | 2.0605637 | 22.73269 | 0.043861 | 42.2  |
| 816    | 2016 | -0.43 | 0.01 | 1.435466 | 2.0605637 | 22.59101 | -0.04421 | 26.06 |
| 600805 | 2016 | -0.44 | 0.01 | 1.435466 | 2.0605637 | 23.00792 | 0.019004 | 23.06 |
| 600805 | 2016 | -0.44 | 0.01 | 1.435466 | 2.0605637 | 23.0696  | 0.019004 | 23.06 |
| 816    | 2016 | -0.43 | 0.01 | 1.435466 | 2.0605637 | 22.59101 | -0.04421 | 26.06 |
| 2530   | 2016 | 0.355 | 0.01 | 1.435466 | 2.0605637 | 22.17654 | 0.011909 | 19.75 |
| 600805 | 2016 | -0.43 | 0.01 | 1.435466 | 2.0605637 | 23.00792 | 0.019004 | 23.06 |
| 2530   | 2016 | 0.175 | 0.01 | 1.435466 | 2.0605637 | 22.17654 | 0.011909 | 19.75 |
| 600805 | 2016 | -0.32 | 0.01 | 1.435466 | 2.0605637 | 23.00792 | 0.019004 | 23.06 |
| 816    | 2016 | -0.44 | 0.01 | 1.435466 | 2.0605637 | 22.59101 | -0.04421 | 26.06 |
| 600805 | 2016 | -0.44 | 0.01 | 1.435466 | 2.0605637 | 23.00792 | 0.019004 | 23.06 |

|        |      |       |      |          |           |          |          |       |
|--------|------|-------|------|----------|-----------|----------|----------|-------|
| 600805 | 2016 | -0.95 | 0.01 | 1.435466 | 2.0605637 | 23.00792 | 0.019004 | 23.06 |
| 2323   | 2016 | -0.47 | 0.01 | 1.435466 | 2.0605637 | 21.43634 | 0.302158 | 44.68 |
| 2530   | 2016 | 0.479 | 0.01 | 1.435466 | 2.0605637 | 22.17654 | 0.011909 | 19.75 |
| 2496   | 2016 | 0.164 | 0.01 | 1.435466 | 2.0605637 | 22.73269 | 0.043861 | 42.2  |
| 2530   | 2016 | 0.223 | 0.01 | 1.435466 | 2.0605637 | 22.17654 | 0.011909 | 19.75 |
| 2496   | 2016 | -0.37 | 0.01 | 1.435466 | 2.0605637 | 22.73269 | 0.043861 | 42.2  |
| 2323   | 2016 | -0.21 | 0.01 | 1.435466 | 2.0605637 | 21.43634 | 0.302158 | 44.68 |
| 600805 | 2016 | 0.107 | 0.01 | 1.435466 | 2.0605637 | 23.00792 | 0.019004 | 23.06 |
| 816    | 2016 | -0.65 | 0.01 | 1.435466 | 2.0605637 | 22.36942 | -0.04421 | 26.06 |
| 600805 | 2016 | -0.42 | 0.01 | 1.435466 | 2.0605637 | 23.00792 | 0.019004 | 23.06 |
| 2323   | 2016 | -0.47 | 0.01 | 1.435466 | 2.0605637 | 21.43634 | 0.302158 | 44.68 |
| 2496   | 2016 | 0.008 | 0.01 | 1.435466 | 2.0605637 | 22.73269 | 0.043861 | 42.2  |
| 2496   | 2016 | 0.164 | 0.01 | 1.435466 | 2.0605637 | 22.73269 | 0.043861 | 42.2  |
| 2530   | 2016 | -0.03 | 0.01 | 1.435466 | 2.0605637 | 22.09656 | 0.011909 | 19.75 |
| 2496   | 2016 | 0.571 | 0.01 | 1.435466 | 2.0605637 | 22.49714 | 0.043861 | 42.2  |
| 2530   | 2016 | 0.434 | 0.01 | 1.435466 | 2.0605637 | 22.17654 | 0.011909 | 19.75 |
| 59     | 2016 | -0.14 | 0    | 1.266688 | 1.6044981 | 24.16914 | 0.184736 | 32.16 |
| 59     | 2016 | -0.14 | 0    | 1.266688 | 1.6044981 | 24.16914 | 0.166738 | 32.16 |
| 59     | 2016 | -0.14 | 0    | 1.266688 | 1.6044981 | 24.05868 | 0.184736 | 32.16 |
| 2366   | 2016 | -0.38 | 0.01 | 1.256081 | 1.5777385 | 22.36186 | 0.210348 | 42.18 |
| 2366   | 2016 | -0.38 | 0.01 | 1.256081 | 1.5777385 | 22.05721 | 0.210348 | 42.18 |
| 2366   | 2016 | -0.39 | 0.01 | 1.256081 | 1.5777385 | 22.36186 | 0.210348 | 42.18 |
| 2366   | 2016 | -0.35 | 0.01 | 1.256081 | 1.5777385 | 22.36186 | 0.210348 | 42.18 |
| 2366   | 2016 | -0.39 | 0.01 | 1.256081 | 1.5777385 | 22.36186 | 0.210348 | 42.18 |
| 2366   | 2016 | -0.62 | 0.01 | 1.256081 | 1.5777385 | 22.36186 | 0.210348 | 42.18 |
| 600165 | 2016 | -0.12 | 0.01 | 1.140001 | 1.2996019 | 21.93101 | -0.20805 | 29.2  |
| 600165 | 2016 | -0.12 | 0.01 | 1.140001 | 1.2996019 | 21.93101 | -0.20805 | 29.2  |
| 962    | 2016 | -0.4  | 0.01 | 1.140001 | 1.2996019 | 21.74165 | 0.019648 | 45.8  |
| 600165 | 2016 | 0.017 | 0.01 | 1.140001 | 1.2996019 | 21.93101 | -0.20805 | 29.2  |
| 962    | 2016 | 0.715 | 0.01 | 1.140001 | 1.2996019 | 21.76037 | 0.019648 | 45.8  |
| 962    | 2016 | -0.4  | 0.01 | 1.140001 | 1.2996019 | 21.76037 | 0.019648 | 45.8  |
| 962    | 2016 | 0.715 | 0.01 | 1.140001 | 1.2996019 | 21.76037 | 0.019648 | 45.8  |
| 600165 | 2016 | 0.017 | 0.01 | 1.140001 | 1.2996019 | 21.79689 | -0.20805 | 29.2  |
| 600165 | 2016 | 0.017 | 0.01 | 1.140001 | 1.2996019 | 21.93101 | -0.20805 | 29.2  |
| 600165 | 2016 | 0.017 | 0.01 | 1.140001 | 1.2996019 | 21.93101 | -0.20805 | 29.2  |
| 962    | 2016 | 0.715 | 0.01 | 1.140001 | 1.2996019 | 21.76037 | 0.019648 | 45.8  |
| 962    | 2016 | 0.715 | 0.01 | 1.140001 | 1.2996019 | 21.76037 | 0.019648 | 45.8  |
| 962    | 2016 | 0.239 | 0.01 | 1.140001 | 1.2996019 | 21.76037 | 0.019648 | 45.8  |
| 600165 | 2016 | -0.57 | 0.01 | 1.140001 | 1.2996019 | 21.93101 | -0.20805 | 29.2  |
| 709    | 2016 | -0.48 | 0    | 1.022433 | 1.0453699 | 25.74206 | 0.030661 | 39.69 |
| 300368 | 2016 | 0.037 | 0    | 1.022433 | 1.0453699 | 20.96845 | 0.057723 | 35.48 |
| 300368 | 2016 | 0.037 | 0    | 1.022433 | 1.0453699 | 21.28408 | 0.057723 | 35.48 |
| 600812 | 2016 | 0.43  | 0    | 1.022433 | 1.0453699 | 23.52519 | 0.009758 | 21.6  |
| 709    | 2016 | -0.89 | 0    | 1.022433 | 1.0453699 | 25.74206 | 0.030661 | 39.69 |
| 413    | 2016 | -0.22 | 0    | 1.022433 | 1.0453699 | 24.56971 | 0.056808 | 11.32 |
| 2691   | 2016 | 0.233 | 0    | 1.022433 | 1.0453699 | 20.64352 | 0.009764 | 29    |
| 600803 | 2016 | -0.41 | 0    | 1.022433 | 1.0453699 | 22.74616 | 0.108472 | 30.97 |
| 600803 | 2016 | 0.037 | 0    | 1.022433 | 1.0453699 | 23.6343  | 0.108472 | 30.97 |
| 300137 | 2016 | 0.001 | 0    | 1.022433 | 1.0453699 | 21.19752 | 0.078113 | 13.86 |
| 600803 | 2016 | -0.41 | 0    | 1.022433 | 1.0453699 | 23.6343  | 0.108472 | 30.97 |
| 300368 | 2016 | 0.468 | 0    | 1.022433 | 1.0453699 | 21.28408 | 0.057723 | 35.48 |
| 300255 | 2016 | 0.9   | 0    | 1.022433 | 1.0453699 | 21.86493 | 0.077888 | 38.28 |
| 300255 | 2016 | 0.9   | 0    | 1.022433 | 1.0453699 | 21.86493 | 0.077888 | 38.28 |
| 413    | 2016 | -0.31 | 0    | 1.022433 | 1.0453699 | 24.3181  | 0.056808 | 11.32 |

|        |      |       |   |          |           |          |          |       |
|--------|------|-------|---|----------|-----------|----------|----------|-------|
| 413    | 2016 | -0.17 | 0 | 1.022433 | 1.0453699 | 24.56971 | 0.056808 | 11.32 |
| 2282   | 2016 | -0.5  | 0 | 1.022433 | 1.0453699 | 20.75287 | 0.015574 | 13.83 |
| 600812 | 2016 | 0.483 | 0 | 1.022433 | 1.0453699 | 23.52519 | 0.009758 | 21.6  |
| 300137 | 2016 | 0.072 | 0 | 1.022433 | 1.0453699 | 21.30291 | 0.078113 | 13.86 |
| 413    | 2016 | 0.222 | 0 | 1.022433 | 1.0453699 | 24.56971 | 0.056808 | 11.32 |
| 2282   | 2016 | -0.4  | 0 | 1.022433 | 1.0453699 | 20.75287 | 0.015574 | 13.83 |
| 300255 | 2016 | 0.9   | 0 | 1.022433 | 1.0453699 | 21.82003 | 0.077888 | 38.28 |
| 600812 | 2016 | 0.483 | 0 | 1.022433 | 1.0453699 | 23.52519 | 0.009758 | 21.6  |
| 300368 | 2016 | 0.037 | 0 | 1.022433 | 1.0453699 | 21.28408 | 0.057723 | 35.48 |
| 158    | 2016 | 0.813 | 0 | 1.022433 | 1.0453699 | 23.27304 | 0.017716 | 27.32 |
| 413    | 2016 | -0.3  | 0 | 1.022433 | 1.0453699 | 24.56971 | 0.056808 | 11.32 |
| 709    | 2016 | -0.66 | 0 | 1.022433 | 1.0453699 | 25.74206 | 0.030661 | 39.69 |
| 413    | 2016 | 0.187 | 0 | 1.022433 | 1.0453699 | 24.56971 | 0.056808 | 11.32 |
| 413    | 2016 | -0.3  | 0 | 1.022433 | 1.0453699 | 24.56971 | 0.056808 | 11.32 |
| 709    | 2016 | -0.89 | 0 | 1.022433 | 1.0453699 | 25.72733 | 0.030661 | 39.69 |
| 158    | 2016 | -0.51 | 0 | 1.022433 | 1.0453699 | 23.27304 | 0.017716 | 27.32 |
| 600803 | 2016 | -0.53 | 0 | 1.022433 | 1.0453699 | 23.6343  | 0.108472 | 30.97 |
| 2691   | 2016 | 0.233 | 0 | 1.022433 | 1.0453699 | 20.64352 | 0.009764 | 29    |
| 600812 | 2016 | 0.202 | 0 | 1.022433 | 1.0453699 | 23.52519 | 0.009758 | 21.6  |
| 2282   | 2016 | -0.31 | 0 | 1.022433 | 1.0453699 | 20.75287 | 0.015574 | 13.83 |
| 300491 | 2016 | 0.034 | 0 | 1.022433 | 1.0453699 | 20.15316 | 0.099021 | 19.72 |
| 158    | 2016 | -0.29 | 0 | 1.022433 | 1.0453699 | 22.92061 | 0.017716 | 27.32 |
| 600812 | 2016 | -0.84 | 0 | 1.022433 | 1.0453699 | 23.52519 | 0.009758 | 21.6  |
| 300255 | 2016 | 0.9   | 0 | 1.022433 | 1.0453699 | 21.86493 | 0.077888 | 38.28 |
| 2603   | 2016 | 0.173 | 0 | 1.022433 | 1.0453699 | 22.55592 | 0.100499 | 25.36 |
| 300137 | 2016 | 0.072 | 0 | 1.022433 | 1.0453699 | 21.30291 | 0.078113 | 13.86 |
| 413    | 2016 | 0.109 | 0 | 1.022433 | 1.0453699 | 24.56971 | 0.056808 | 11.32 |
| 300137 | 2016 | 0.072 | 0 | 1.022433 | 1.0453699 | 21.30291 | 0.078113 | 13.86 |
| 300491 | 2016 | 0.034 | 0 | 1.022433 | 1.0453699 | 20.15316 | 0.099021 | 19.72 |
| 2603   | 2016 | 0.785 | 0 | 1.022433 | 1.0453699 | 22.55592 | 0.100499 | 25.36 |
| 158    | 2016 | -0.12 | 0 | 1.022433 | 1.0453699 | 23.27304 | 0.017716 | 27.32 |
| 600812 | 2016 | 0.483 | 0 | 1.022433 | 1.0453699 | 23.52519 | 0.009758 | 21.6  |
| 413    | 2016 | -0.33 | 0 | 1.022433 | 1.0453699 | 24.56971 | 0.056808 | 11.32 |
| 2691   | 2016 | -0.01 | 0 | 1.022433 | 1.0453699 | 20.64352 | 0.009764 | 29    |
| 300255 | 2016 | 0.9   | 0 | 1.022433 | 1.0453699 | 21.86493 | 0.077888 | 38.28 |
| 300137 | 2016 | -0.46 | 0 | 1.022433 | 1.0453699 | 21.30291 | 0.078113 | 13.86 |
| 300368 | 2016 | 0.268 | 0 | 1.022433 | 1.0453699 | 21.28408 | 0.057723 | 35.48 |
| 600803 | 2016 | 0.251 | 0 | 1.022433 | 1.0453699 | 23.6343  | 0.108472 | 30.97 |
| 600812 | 2016 | 0.483 | 0 | 1.022433 | 1.0453699 | 23.52519 | 0.009758 | 21.6  |
| 413    | 2016 | -0.66 | 0 | 1.022433 | 1.0453699 | 24.56971 | 0.056808 | 11.32 |
| 600812 | 2016 | 0.041 | 0 | 1.022433 | 1.0453699 | 23.52519 | 0.009758 | 21.6  |
| 600812 | 2016 | 0.483 | 0 | 1.022433 | 1.0453699 | 23.52519 | 0.009758 | 21.6  |
| 600812 | 2016 | 0.483 | 0 | 1.022433 | 1.0453699 | 23.52519 | 0.009758 | 21.6  |
| 709    | 2016 | -0.48 | 0 | 1.022433 | 1.0453699 | 25.74206 | 0.030661 | 39.69 |
| 600803 | 2016 | 0.037 | 0 | 1.022433 | 1.0453699 | 23.6343  | 0.108472 | 30.97 |
| 600812 | 2016 | 0.483 | 0 | 1.022433 | 1.0453699 | 23.52519 | 0.009758 | 21.6  |
| 2603   | 2016 | 0.785 | 0 | 1.022433 | 1.0453699 | 22.55592 | 0.100499 | 25.36 |
| 2603   | 2016 | 0.173 | 0 | 1.022433 | 1.0453699 | 22.44372 | 0.100499 | 25.36 |
| 709    | 2016 | -0.68 | 0 | 1.022433 | 1.0453699 | 25.74206 | 0.030661 | 39.69 |
| 600803 | 2016 | -0.23 | 0 | 1.022433 | 1.0453699 | 23.6343  | 0.108472 | 30.97 |
| 600803 | 2016 | 0.748 | 0 | 1.022433 | 1.0453699 | 23.6343  | 0.108472 | 30.97 |
| 2691   | 2016 | -0.15 | 0 | 1.022433 | 1.0453699 | 20.54771 | 0.009764 | 29    |
| 2603   | 2016 | 0.867 | 0 | 1.022433 | 1.0453699 | 22.55592 | 0.100499 | 25.36 |
| 300137 | 2016 | 0.072 | 0 | 1.022433 | 1.0453699 | 21.30291 | 0.078113 | 13.86 |

|        |      |       |      |          |            |          |          |       |
|--------|------|-------|------|----------|------------|----------|----------|-------|
| 600812 | 2016 | -0.84 | 0    | 1.022433 | 1.0453699  | 23.52519 | 0.009758 | 21.6  |
| 2603   | 2016 | 0.382 | 0    | 1.022433 | 1.0453699  | 22.55592 | 0.100499 | 25.36 |
| 300368 | 2016 | 0.468 | 0    | 1.022433 | 1.0453699  | 21.28408 | 0.057723 | 35.48 |
| 300368 | 2016 | 0.037 | 0    | 1.022433 | 1.0453699  | 21.28408 | 0.057723 | 35.48 |
| 300368 | 2016 | 0.037 | 0    | 1.022433 | 1.0453699  | 21.28408 | 0.057723 | 35.48 |
| 2282   | 2016 | -0.5  | 0    | 1.022433 | 1.0453699  | 20.75287 | 0.015574 | 13.83 |
| 600803 | 2016 | 0.037 | 0    | 1.022433 | 1.0453699  | 23.6343  | 0.108472 | 30.97 |
| 709    | 2016 | -0.33 | 0    | 1.022433 | 1.0453699  | 25.74206 | 0.030661 | 39.69 |
| 413    | 2016 | 0.666 | 0    | 1.022433 | 1.0453699  | 24.56971 | 0.056808 | 11.32 |
| 300137 | 2016 | -0.19 | 0    | 1.022433 | 1.0453699  | 21.30291 | 0.078113 | 13.86 |
| 413    | 2016 | -0.15 | 0    | 1.022433 | 1.0453699  | 24.56971 | 0.056808 | 11.32 |
| 600812 | 2016 | 0.238 | 0    | 1.022433 | 1.0453699  | 23.52519 | 0.009758 | 21.6  |
| 709    | 2016 | -0.51 | 0    | 1.022433 | 1.0453699  | 25.74206 | 0.030661 | 39.69 |
| 300491 | 2016 | 0.034 | 0    | 1.022433 | 1.0453699  | 20.1531  | 0.099021 | 19.72 |
| 2691   | 2016 | 0.233 | 0    | 1.022433 | 1.0453699  | 20.64352 | 0.009764 | 29    |
| 600812 | 2016 | 0.483 | 0    | 1.022433 | 1.0453699  | 23.46168 | 0.009758 | 21.6  |
| 709    | 2016 | -0.48 | 0    | 1.022433 | 1.0453699  | 25.74206 | 0.030661 | 39.69 |
| 413    | 2016 | 0.361 | 0    | 1.022433 | 1.0453699  | 24.56971 | 0.056808 | 11.32 |
| 300368 | 2016 | 0.037 | 0    | 1.022433 | 1.0453699  | 21.28408 | 0.057723 | 35.48 |
| 600812 | 2016 | 0.483 | 0    | 1.022433 | 1.0453699  | 23.52519 | 0.009758 | 21.6  |
| 300255 | 2016 | 0.9   | 0    | 1.022433 | 1.0453699  | 21.86493 | 0.077888 | 38.28 |
| 2691   | 2016 | -0.01 | 0    | 1.022433 | 1.0453699  | 20.64352 | 0.009764 | 29    |
| 709    | 2016 | -0.46 | 0    | 1.022433 | 1.0453699  | 25.74206 | 0.030661 | 39.69 |
| 709    | 2016 | -0.52 | 0    | 1.022433 | 1.0453699  | 25.74206 | 0.030661 | 39.69 |
| 600803 | 2016 | -0.27 | 0    | 1.022433 | 1.0453699  | 23.6343  | 0.108472 | 30.97 |
| 2603   | 2016 | 0.522 | 0    | 1.022433 | 1.0453699  | 22.55592 | 0.100499 | 25.36 |
| 709    | 2016 | -0.48 | 0    | 1.022433 | 1.0453699  | 25.74206 | 0.030661 | 39.69 |
| 600803 | 2016 | 0.037 | 0    | 1.022433 | 1.0453699  | 23.6343  | 0.108472 | 30.97 |
| 2282   | 2016 | -0.31 | 0    | 1.022433 | 1.0453699  | 20.66007 | 0.015574 | 13.83 |
| 158    | 2016 | -0.12 | 0    | 1.022433 | 1.0453699  | 23.27304 | 0.017716 | 27.32 |
| 300137 | 2016 | 0.072 | 0    | 1.022433 | 1.0453699  | 21.30291 | 0.078113 | 13.86 |
| 158    | 2016 | -0.19 | 0    | 1.022433 | 1.0453699  | 23.27304 | 0.017716 | 27.32 |
| 600812 | 2016 | 0.041 | 0    | 1.022433 | 1.0453699  | 23.52519 | 0.009758 | 21.6  |
| 300137 | 2016 | 0.072 | 0    | 1.022433 | 1.0453699  | 21.30291 | 0.078113 | 13.86 |
| 300137 | 2016 | -0.23 | 0    | 1.022433 | 1.0453699  | 21.30291 | 0.078113 | 13.86 |
| 300137 | 2016 | 0.072 | 0    | 1.022433 | 1.0453699  | 21.30291 | 0.078113 | 13.86 |
| 158    | 2016 | -0.32 | 0    | 1.022433 | 1.0453699  | 23.27304 | 0.060412 | 27.32 |
| 889    | 2016 | -0.47 | 0    | 1.347512 | 1.8157892  | 21.50782 | 0.0896   | 33.46 |
| 2459   | 2016 | -0.41 | 0    | 1.347512 | 1.8157892  | 20.98819 | 0.016267 | 36.39 |
| 2459   | 2016 | -0.29 | 0    | 1.347512 | 1.8157892  | 21.01751 | 0.016267 | 36.39 |
| 889    | 2016 | -0.47 | 0    | 1.347512 | 1.8157892  | 21.50782 | 0.0896   | 33.46 |
| 889    | 2016 | -0.47 | 0    | 1.347512 | 1.8157892  | 21.81851 | 0.0896   | 33.46 |
| 2459   | 2016 | -0.26 | 0    | 1.347512 | 1.8157892  | 21.01751 | 0.016267 | 36.39 |
| 2459   | 2016 | -0.41 | 0    | 1.347512 | 1.8157892  | 21.01751 | 0.016267 | 36.39 |
| 2459   | 2016 | -0.26 | 0    | 1.347512 | 1.8157892  | 21.01751 | 0.016267 | 36.39 |
| 2459   | 2016 | -0.41 | 0    | 1.347512 | 1.8157892  | 21.01751 | 0.016267 | 36.39 |
| 2440   | 2016 | 0.421 | 0.04 | 0.025156 | 0.00063282 | 22.78243 | 0.102946 | 16.73 |
| 2602   | 2016 | 0.381 | 0.04 | 0.025156 | 0.00063282 | 22.42873 | 0.115289 | 26.58 |
| 600790 | 2016 | 0.416 | 0.04 | 0.025156 | 0.00063282 | 22.82253 | 0.075365 | 35.78 |
| 2375   | 2016 | -0.4  | 0.04 | 0.025156 | 0.00063282 | 23.65306 | 0.045262 | 32.77 |
| 2011   | 2016 | -0.72 | 0.04 | 0.025156 | 0.00063282 | 23.18957 | 0.017757 | 29.48 |
| 600070 | 2016 | -0.84 | 0.04 | 0.025156 | 0.00063282 | 22.01994 | 0.057241 | 28.16 |
| 600580 | 2016 | -0.32 | 0.04 | 0.025156 | 0.00063282 | 23.50095 | 0.051651 | 32.8  |
| 2050   | 2016 | 0.004 | 0.04 | 0.025156 | 0.00063282 | 22.85134 | 0.160595 | 43.76 |

|        |      |       |      |          |            |          |          |       |
|--------|------|-------|------|----------|------------|----------|----------|-------|
| 2520   | 2016 | -0.11 | 0.04 | 0.025156 | 0.00063282 | 21.32082 | 0.03057  | 44.78 |
| 2375   | 2016 | -0.42 | 0.04 | 0.025156 | 0.00063282 | 23.65306 | 0.045262 | 32.77 |
| 2011   | 2016 | -0.06 | 0.04 | 0.025156 | 0.00063282 | 23.18957 | 0.017757 | 29.48 |
| 300316 | 2016 | -0.27 | 0.04 | 0.025156 | 0.00063282 | 22.14182 | 0.053399 | 48.46 |
| 600526 | 2016 | 0.072 | 0.04 | 0.025156 | 0.00063282 | 22.61953 | 0.019023 | 25.67 |
| 600216 | 2016 | 0.785 | 0.04 | 0.025156 | 0.00063282 | 22.89964 | 0.063552 | 21.53 |
| 600059 | 2016 | -0.93 | 0.04 | 0.025156 | 0.00063282 | 22.24219 | 0.030955 | 41.39 |
| 2375   | 2016 | -0.4  | 0.04 | 0.025156 | 0.00063282 | 23.2593  | 0.045262 | 32.77 |
| 603008 | 2016 | -0.79 | 0.04 | 0.025156 | 6.33E-04   | 22.19952 | 0.08419  | 25.57 |
| 2085   | 2016 | -0.68 | 0.04 | 0.025156 | 6.33E-04   | 22.95205 | 0.188056 | 45.69 |
| 601579 | 2016 | 0.046 | 0.04 | 0.025156 | 6.33E-04   | 22.03156 | 0.049036 | 32.97 |
| 600526 | 2016 | -0.59 | 0.04 | 0.025156 | 6.33E-04   | 22.79924 | 0.019023 | 25.67 |
| 2020   | 2016 | 0.974 | 0.04 | 0.025156 | 6.33E-04   | 21.91434 | 0.083737 | 23.16 |
| 2001   | 2016 | 0.352 | 0.04 | 0.025156 | 6.33E-04   | 23.15779 | 0.151464 | 56.36 |
| 600526 | 2016 | -0.1  | 0.04 | 0.025156 | 6.33E-04   | 22.79924 | 0.019023 | 25.67 |
| 2574   | 2016 | -0.84 | 0.04 | 0.025156 | 6.33E-04   | 22.32339 | 0.013811 | 29.96 |
| 2440   | 2016 | 0.218 | 0.04 | 0.025156 | 0.00063282 | 22.78243 | 0.102946 | 16.73 |
| 600216 | 2016 | 0.785 | 0.04 | 0.025156 | 0.00063282 | 22.89964 | 0.063552 | 21.53 |
| 2224   | 2016 | -0.32 | 0.04 | 0.025156 | 0.00063282 | 21.2953  | 0.137955 | 34.99 |
| 2001   | 2016 | 0.632 | 0.04 | 0.025156 | 0.00063282 | 22.76207 | 0.151464 | 56.36 |
| 600352 | 2016 | -0.71 | 0.04 | 0.025156 | 0.00063282 | 24.41056 | 0.142931 | 11.98 |
| 2263   | 2016 | 0.665 | 0.04 | 0.025156 | 0.00063282 | 22.04027 | -0.06892 | 23.14 |
| 600070 | 2016 | -0.44 | 0.04 | 0.025156 | 0.00063282 | 22.01994 | 0.057241 | 28.16 |
| 2440   | 2016 | 0.493 | 0.04 | 0.025156 | 0.00063282 | 22.78243 | 0.102946 | 16.73 |
| 600526 | 2016 | -0.2  | 0.04 | 0.025156 | 0.00063282 | 22.79924 | 0.019023 | 25.67 |
| 601579 | 2016 | 0.046 | 0.04 | 0.025156 | 0.00063282 | 22.03156 | 0.049036 | 32.97 |
| 600580 | 2016 | -0.7  | 0.04 | 0.025156 | 6.33E-04   | 23.50095 | 0.051651 | 32.8  |
| 2602   | 2016 | 0.381 | 0.04 | 0.025156 | 6.33E-04   | 22.42873 | 0.115289 | 26.58 |
| 2011   | 2016 | -0.19 | 0.04 | 0.025156 | 6.33E-04   | 23.18957 | 0.017757 | 29.48 |
| 600526 | 2016 | -0.59 | 0.04 | 0.025156 | 6.33E-04   | 22.79924 | 0.019023 | 25.67 |
| 2602   | 2016 | 0.381 | 0.04 | 0.025156 | 6.33E-04   | 22.42873 | 0.115289 | 26.58 |
| 2006   | 2016 | -0.35 | 0.04 | 0.025156 | 0.00063282 | 21.20511 | 0.061159 | 30.16 |
| 2050   | 2016 | -0.14 | 0.04 | 0.025156 | 0.00063282 | 22.85134 | 0.160595 | 43.76 |
| 300411 | 2016 | 0.095 | 0.04 | 0.025156 | 0.00063282 | 20.59756 | 0.073334 | 21.52 |
| 2602   | 2016 | 0.381 | 0.04 | 0.025156 | 0.00063282 | 22.42873 | 0.115289 | 26.58 |
| 2050   | 2016 | 0.054 | 0.04 | 0.025156 | 0.00063282 | 22.85134 | 0.160595 | 43.76 |
| 600580 | 2016 | -0.58 | 0.04 | 0.025156 | 0.00063282 | 23.50095 | 0.051651 | 32.8  |
| 2020   | 2016 | 0.974 | 0.04 | 0.025156 | 0.00063282 | 21.91434 | 0.083737 | 23.16 |
| 600070 | 2016 | -0.44 | 0.04 | 0.025156 | 0.00063282 | 21.73953 | 0.057241 | 28.16 |
| 2020   | 2016 | 0.974 | 0.04 | 0.025156 | 0.00063282 | 21.91434 | 0.083737 | 23.16 |
| 2050   | 2016 | -0.31 | 0.04 | 0.025156 | 0.00063282 | 22.85134 | 0.160595 | 43.76 |
| 2020   | 2016 | 0.974 | 0.04 | 0.025156 | 0.00063282 | 21.91434 | 0.083737 | 23.16 |
| 2001   | 2016 | 0.712 | 0.04 | 0.025156 | 0.00063282 | 22.76207 | 0.151464 | 56.36 |
| 2699   | 2016 | -0.3  | 0.04 | 0.025156 | 0.00063282 | 22.01762 | 0.053935 | 37.76 |
| 2011   | 2016 | -0.19 | 0.04 | 0.025156 | 0.00063282 | 23.18957 | 0.017757 | 29.48 |
| 300316 | 2016 | -0.13 | 0.04 | 0.025156 | 0.00063282 | 22.14182 | 0.053399 | 48.46 |
| 2001   | 2016 | 0.802 | 0.04 | 0.025156 | 0.00063282 | 22.76207 | 0.151464 | 56.36 |
| 600526 | 2016 | -0.1  | 0.04 | 0.025156 | 0.00063282 | 22.79924 | 0.019023 | 25.67 |
| 2011   | 2016 | -0.42 | 0.04 | 0.025156 | 0.00063282 | 23.18957 | 0.017757 | 29.48 |
| 600580 | 2016 | -0.37 | 0.04 | 0.025156 | 0.00063282 | 22.92388 | 0.051651 | 32.8  |
| 2699   | 2016 | -0.33 | 0.04 | 0.025156 | 0.00063282 | 22.01762 | 0.053935 | 37.76 |
| 600526 | 2016 | -0.1  | 0.04 | 0.025156 | 0.00063282 | 22.79924 | 0.019023 | 25.67 |
| 2263   | 2016 | 0.665 | 0.04 | 0.025156 | 0.00063282 | 22.10231 | -0.06892 | 23.14 |
| 2440   | 2016 | 0.427 | 0.04 | 0.025156 | 0.00063282 | 22.78243 | 0.102946 | 16.73 |

|        |      |       |      |          |            |          |          |       |
|--------|------|-------|------|----------|------------|----------|----------|-------|
| 300316 | 2016 | -0.13 | 0.04 | 0.025156 | 0.00063282 | 22.14182 | 0.053399 | 48.46 |
| 2375   | 2016 | -0.42 | 0.04 | 0.025156 | 0.00063282 | 23.65306 | 0.045262 | 32.77 |
| 2633   | 2016 | -0.58 | 0.04 | 0.025156 | 0.00063282 | 20.22678 | -0.04988 | 28.12 |
| 600059 | 2016 | 0.398 | 0.04 | 0.025156 | 0.00063282 | 22.15223 | 0.030955 | 41.39 |
| 600580 | 2016 | -0.7  | 0.04 | 0.025156 | 0.00063282 | 23.50095 | 0.051651 | 32.8  |
| 2224   | 2016 | -0.01 | 0.04 | 0.025156 | 0.00063282 | 21.2953  | 0.137955 | 34.99 |
| 2020   | 2016 | 0.974 | 0.04 | 0.025156 | 0.00063282 | 21.91434 | 0.083737 | 23.16 |
| 2011   | 2016 | 0.607 | 0.04 | 0.025156 | 0.00063282 | 23.18957 | 0.017757 | 29.48 |
| 600580 | 2016 | -0.48 | 0.04 | 0.025156 | 0.00063282 | 23.50095 | 0.051651 | 32.8  |
| 2020   | 2016 | 0.974 | 0.04 | 0.025156 | 0.00063282 | 21.91434 | 0.083737 | 23.16 |
| 600261 | 2016 | -0.32 | 0.04 | 0.025156 | 0.00063282 | 22.45326 | 0.140092 | 32.14 |
| 600580 | 2016 | -0.1  | 0.04 | 0.025156 | 0.00063282 | 23.50095 | 0.051651 | 32.8  |
| 2085   | 2016 | -0.47 | 0.04 | 0.025156 | 0.00063282 | 22.95205 | 0.188056 | 45.69 |
| 2263   | 2016 | 0.665 | 0.04 | 0.025156 | 0.00063282 | 22.10231 | -0.06892 | 23.14 |
| 2020   | 2016 | 0.974 | 0.04 | 0.025156 | 0.00063282 | 21.91434 | 0.083737 | 23.16 |
| 2263   | 2016 | 0.665 | 0.04 | 0.025156 | 0.00063282 | 22.10231 | -0.06892 | 23.14 |
| 2006   | 2016 | -0.35 | 0.04 | 0.025156 | 0.00063282 | 21.20511 | 0.061159 | 30.16 |
| 2617   | 2016 | -0.43 | 0.04 | 0.025156 | 0.00063282 | 21.91732 | 0.026422 | 37.77 |
| 2011   | 2016 | 0.189 | 0.04 | 0.025156 | 0.00063282 | 23.18957 | 0.017757 | 29.48 |
| 2203   | 2016 | -0.62 | 0.04 | 0.025156 | 0.00063282 | 23.26992 | 0.121604 | 48.41 |
| 603008 | 2016 | -0.69 | 0.04 | 0.025156 | 0.00063282 | 22.19952 | 0.08419  | 25.57 |
| 2699   | 2016 | -0.39 | 0.04 | 0.025156 | 0.00063282 | 22.01762 | 0.053935 | 37.76 |
| 603008 | 2016 | -0.79 | 0.04 | 0.025156 | 0.00063282 | 22.19952 | 0.08419  | 25.57 |
| 600261 | 2016 | -0.23 | 0.04 | 0.025156 | 0.00063282 | 22.45326 | 0.140092 | 32.14 |
| 600352 | 2016 | -0.71 | 0.04 | 0.025156 | 0.00063282 | 24.41056 | 0.142931 | 11.98 |
| 600059 | 2016 | 0.398 | 0.04 | 0.025156 | 0.00063282 | 22.24219 | 0.030955 | 41.39 |
| 600526 | 2016 | -0.1  | 0.04 | 0.025156 | 0.00063282 | 22.79924 | 0.019023 | 25.67 |
| 2001   | 2016 | 0.867 | 0.04 | 0.025156 | 0.00063282 | 22.76207 | 0.151464 | 56.36 |
| 2020   | 2016 | 0.842 | 0.04 | 0.025156 | 0.00063282 | 21.91434 | 0.083737 | 23.16 |
| 600387 | 2016 | -0.62 | 0.04 | 0.025156 | 0.00063282 | 22.82056 | -0.02565 | 22.31 |
| 2011   | 2016 | -0.06 | 0.04 | 0.025156 | 0.00063282 | 22.94446 | 0.017757 | 29.48 |
| 2633   | 2016 | -0.58 | 0.04 | 0.025156 | 0.00063282 | 20.22431 | -0.04988 | 28.12 |
| 2011   | 2016 | -0.72 | 0.04 | 0.025156 | 0.00063282 | 23.18957 | 0.017757 | 29.48 |
| 2617   | 2016 | -0.39 | 0.04 | 0.025156 | 0.00063282 | 21.91732 | 0.026422 | 37.77 |
| 2001   | 2016 | -0.13 | 0.04 | 0.025156 | 0.00063282 | 22.76207 | 0.151464 | 56.36 |
| 600790 | 2016 | 0.151 | 0.04 | 0.025156 | 0.00063282 | 22.82253 | 0.075365 | 35.78 |
| 2011   | 2016 | -0.72 | 0.04 | 0.025156 | 0.00063282 | 23.18957 | 0.017757 | 29.48 |
| 2224   | 2016 | 0.202 | 0.04 | 0.025156 | 0.00063282 | 21.2953  | 0.137955 | 34.99 |
| 600526 | 2016 | -0.43 | 0.04 | 0.025156 | 0.00063282 | 22.79924 | 0.019023 | 25.67 |
| 600352 | 2016 | 0.479 | 0.04 | 0.025156 | 0.00063282 | 24.41056 | 0.142931 | 11.98 |
| 600352 | 2016 | -0.49 | 0.04 | 0.025156 | 0.00063282 | 24.41056 | 0.142931 | 11.98 |
| 2520   | 2016 | 0.223 | 0.04 | 0.025156 | 0.00063282 | 21.57826 | 0.03057  | 44.78 |
| 2085   | 2016 | -0.68 | 0.04 | 0.025156 | 0.00063282 | 22.95205 | 0.188056 | 45.69 |
| 2699   | 2016 | -0.31 | 0.04 | 0.025156 | 0.00063282 | 21.99191 | 0.053935 | 37.76 |
| 2001   | 2016 | 0.73  | 0.04 | 0.025156 | 0.00063282 | 22.76207 | 0.151464 | 56.36 |
| 300411 | 2016 | 0.095 | 0.04 | 0.025156 | 0.00063282 | 20.59756 | 0.073334 | 21.52 |
| 600070 | 2016 | -0.73 | 0.04 | 0.025156 | 0.00063282 | 22.01994 | 0.057241 | 28.16 |
| 2085   | 2016 | -0.02 | 0.04 | 0.025156 | 0.00063282 | 22.95205 | 0.188056 | 45.69 |
| 2085   | 2016 | -0.49 | 0.04 | 0.025156 | 0.00063282 | 22.95205 | 0.188056 | 45.69 |
| 2006   | 2016 | -0.62 | 0.04 | 0.025156 | 0.00063282 | 21.20511 | 0.061159 | 30.16 |
| 2011   | 2016 | 0.077 | 0.04 | 0.025156 | 0.00063282 | 23.18957 | 0.017757 | 29.48 |
| 2011   | 2016 | -0.03 | 0.04 | 0.025156 | 0.00063282 | 23.18957 | 0.017757 | 29.48 |
| 2574   | 2016 | -0.84 | 0.04 | 0.025156 | 0.00063282 | 22.31688 | 0.013811 | 29.96 |
| 600352 | 2016 | 0.548 | 0.04 | 0.025156 | 0.00063282 | 24.41056 | 0.142931 | 11.98 |

|        |      |       |      |          |            |          |          |       |
|--------|------|-------|------|----------|------------|----------|----------|-------|
| 2263   | 2016 | 0.665 | 0.04 | 0.025156 | 0.00063282 | 22.10231 | -0.06892 | 23.14 |
| 600580 | 2016 | -0.09 | 0.04 | 0.025156 | 0.00063282 | 23.50095 | 0.051651 | 32.8  |
| 600352 | 2016 | 0.479 | 0.04 | 0.025156 | 0.00063282 | 24.41056 | 0.142931 | 11.98 |
| 2590   | 2016 | 0.238 | 0.04 | 0.025156 | 0.00063282 | 21.88521 | 0.074952 | 45.86 |
| 2203   | 2016 | -0.63 | 0.04 | 0.025156 | 0.00063282 | 23.26992 | 0.121604 | 48.41 |
| 600387 | 2016 | -0.62 | 0.04 | 0.025156 | 0.00063282 | 22.82056 | -0.02565 | 22.31 |
| 600261 | 2016 | 0.041 | 0.04 | 0.025156 | 0.00063282 | 22.45326 | 0.140092 | 32.14 |
| 2011   | 2016 | -0.72 | 0.04 | 0.025156 | 0.00063282 | 23.18957 | 0.017757 | 29.48 |
| 600580 | 2016 | -0.38 | 0.04 | 0.025156 | 0.00063282 | 23.50095 | 0.051651 | 32.8  |
| 2085   | 2016 | -0.57 | 0.04 | 0.025156 | 0.00063282 | 22.43258 | 0.188056 | 45.69 |
| 2011   | 2016 | -0.72 | 0.04 | 0.025156 | 0.00063282 | 23.18957 | 0.017757 | 29.48 |
| 2085   | 2016 | -0.62 | 0.04 | 0.025156 | 0.00063282 | 22.95205 | 0.188056 | 45.69 |
| 600352 | 2016 | 0.365 | 0.04 | 0.025156 | 0.00063282 | 24.41056 | 0.142931 | 11.98 |
| 2370   | 2016 | 0.887 | 0.04 | 0.025156 | 0.00063282 | 21.62777 | 0.057983 | 26.77 |
| 600261 | 2016 | 0.041 | 0.04 | 0.025156 | 0.00063282 | 22.45326 | 0.140092 | 32.14 |
| 2590   | 2016 | -0.76 | 0.04 | 0.025156 | 0.00063282 | 21.88521 | 0.074952 | 45.86 |
| 2085   | 2016 | -0.35 | 0.04 | 0.025156 | 0.00063282 | 22.95205 | 0.188056 | 45.69 |
| 2617   | 2016 | -0.18 | 0.04 | 0.025156 | 0.00063282 | 21.91732 | 0.026422 | 37.77 |
| 603008 | 2016 | -0.77 | 0.04 | 0.025156 | 0.00063282 | 22.19952 | 0.08419  | 25.57 |
| 600580 | 2016 | -0.7  | 0.04 | 0.025156 | 0.00063282 | 23.50095 | 0.051651 | 32.8  |
| 600261 | 2016 | -0.62 | 0.04 | 0.025156 | 0.00063282 | 22.45326 | 0.140092 | 32.14 |
| 300316 | 2016 | -0.27 | 0.04 | 0.025156 | 0.00063282 | 22.14182 | 0.053399 | 48.46 |
| 600216 | 2016 | 0.785 | 0.04 | 0.025156 | 0.00063282 | 22.89964 | 0.063552 | 21.53 |
| 600580 | 2016 | -0.34 | 0.04 | 0.025156 | 0.00063282 | 23.50095 | 0.051651 | 32.8  |
| 603311 | 2016 | -0.7  | 0.04 | 0.025156 | 0.00063282 | 20.56305 | 0.10146  | 50.7  |
| 2001   | 2016 | 0.802 | 0.04 | 0.025156 | 0.00063282 | 22.76207 | 0.151464 | 56.36 |
| 2011   | 2016 | -0.1  | 0.04 | 0.025156 | 0.00063282 | 23.18957 | 0.017757 | 29.48 |
| 600216 | 2016 | 0.785 | 0.04 | 0.025156 | 0.00063282 | 22.83372 | 0.063552 | 21.53 |
| 2085   | 2016 | -0.45 | 0.04 | 0.025156 | 0.00063282 | 22.95205 | 0.188056 | 45.69 |
| 600352 | 2016 | 0.058 | 0.04 | 0.025156 | 0.00063282 | 24.41056 | 0.142931 | 11.98 |
| 2050   | 2016 | -0.63 | 0.04 | 0.025156 | 0.00063282 | 22.85134 | 0.160595 | 43.76 |
| 600352 | 2016 | 0.479 | 0.04 | 0.025156 | 0.00063282 | 24.41056 | 0.142931 | 11.98 |
| 600580 | 2016 | -0.37 | 0.04 | 0.025156 | 0.00063282 | 23.50095 | 0.051651 | 32.8  |
| 600526 | 2016 | -0.59 | 0.04 | 0.025156 | 0.00063282 | 22.79924 | 0.019023 | 25.67 |
| 2520   | 2016 | 0.223 | 0.04 | 0.025156 | 0.00063282 | 21.57826 | 0.03057  | 44.78 |
| 2011   | 2016 | -0.4  | 0.04 | 0.025156 | 0.00063282 | 23.18957 | 0.017757 | 29.48 |
| 600352 | 2016 | 0.479 | 0.04 | 0.025156 | 0.00063282 | 24.41056 | 0.142931 | 11.98 |
| 603311 | 2016 | 0.62  | 0.04 | 0.025156 | 0.00063282 | 20.41483 | 0.10146  | 50.7  |
| 2375   | 2016 | -0.62 | 0.04 | 0.025156 | 0.00063282 | 23.65306 | 0.045262 | 32.77 |
| 2085   | 2016 | -0.68 | 0.04 | 0.025156 | 0.00063282 | 22.95205 | 0.188056 | 45.69 |
| 2203   | 2016 | -0.66 | 0.04 | 0.025156 | 0.00063282 | 22.94815 | 0.121604 | 48.41 |
| 600352 | 2016 | 0.548 | 0.04 | 0.025156 | 0.00063282 | 24.41056 | 0.142931 | 11.98 |
| 600526 | 2016 | -0.1  | 0.04 | 0.025156 | 0.00063282 | 22.79924 | 0.019023 | 25.67 |
| 2020   | 2016 | 0.747 | 0.04 | 0.025156 | 0.00063282 | 21.91434 | 0.083737 | 23.16 |
| 603008 | 2016 | -0.79 | 0.04 | 0.025156 | 0.00063282 | 22.19952 | 0.08419  | 25.57 |
| 2375   | 2016 | -0.5  | 0.04 | 0.025156 | 0.00063282 | 23.65306 | 0.045262 | 32.77 |
| 2011   | 2016 | 0.607 | 0.04 | 0.025156 | 0.00063282 | 23.18957 | 0.017757 | 29.48 |
| 600070 | 2016 | 0.441 | 0.04 | 0.025156 | 0.00063282 | 22.01994 | 0.057241 | 28.16 |
| 600261 | 2016 | -0.31 | 0.04 | 0.025156 | 0.00063282 | 22.45326 | 0.140092 | 32.14 |
| 2263   | 2016 | 0.665 | 0.04 | 0.025156 | 0.00063282 | 22.10231 | -0.06892 | 23.14 |
| 600352 | 2016 | 0.479 | 0.04 | 0.025156 | 0.00063282 | 24.41056 | 0.142931 | 11.98 |
| 600261 | 2016 | -0.48 | 0.04 | 0.025156 | 0.00063282 | 22.45326 | 0.140092 | 32.14 |
| 601579 | 2016 | 0.046 | 0.04 | 0.025156 | 0.00063282 | 22.03156 | 0.049036 | 32.97 |
| 2617   | 2016 | -0.56 | 0.04 | 0.025156 | 0.00063282 | 21.91732 | 0.026422 | 37.77 |

|        |      |       |      |          |            |          |          |       |
|--------|------|-------|------|----------|------------|----------|----------|-------|
| 2001   | 2016 | 0.867 | 0.04 | 0.025156 | 6.33E-04   | 22.76207 | 0.151464 | 56.36 |
| 2699   | 2016 | 0.938 | 0.04 | 0.025156 | 6.33E-04   | 22.01762 | 0.053935 | 37.76 |
| 2050   | 2016 | -0.45 | 0.04 | 0.025156 | 6.33E-04   | 22.40455 | 0.160595 | 43.76 |
| 2617   | 2016 | -0.39 | 0.04 | 0.025156 | 0.00063282 | 21.79691 | 0.026422 | 37.77 |
| 600070 | 2016 | -0.44 | 0.04 | 0.025156 | 0.00063282 | 22.01994 | 0.057241 | 28.16 |
| 600352 | 2016 | 0.616 | 0.04 | 0.025156 | 0.00063282 | 24.41056 | 0.142931 | 11.98 |
| 2006   | 2016 | -0.62 | 0.04 | 0.025156 | 0.00063282 | 21.20511 | 0.061159 | 30.16 |
| 600261 | 2016 | 0.041 | 0.04 | 0.025156 | 0.00063282 | 22.45326 | 0.140092 | 32.14 |
| 300411 | 2016 | 0.095 | 0.04 | 0.025156 | 0.00063282 | 20.59756 | 0.073334 | 21.52 |
| 2203   | 2016 | -0.72 | 0.04 | 0.025156 | 0.00063282 | 23.26992 | 0.121604 | 48.41 |
| 2001   | 2016 | 0.73  | 0.04 | 0.025156 | 0.00063282 | 22.76207 | 0.151464 | 56.36 |
| 2203   | 2016 | -0.63 | 0.04 | 0.025156 | 0.00063282 | 23.26992 | 0.121604 | 48.41 |
| 2011   | 2016 | -0.09 | 0.04 | 0.025156 | 0.00063282 | 23.18957 | 0.017757 | 29.48 |
| 2440   | 2016 | 0.659 | 0.04 | 0.025156 | 0.00063282 | 22.78243 | 0.102946 | 16.73 |
| 600387 | 2016 | -0.62 | 0.04 | 0.025156 | 0.00063282 | 21.54527 | -0.02565 | 22.31 |
| 600790 | 2016 | 0.151 | 0.04 | 0.025156 | 0.00063282 | 22.82253 | 0.075365 | 35.78 |
| 2617   | 2016 | -0.18 | 0.04 | 0.025156 | 0.00063282 | 21.91732 | 0.026422 | 37.77 |
| 2520   | 2016 | 0.187 | 0.04 | 0.025156 | 0.00063282 | 21.57826 | 0.03057  | 44.78 |
| 2617   | 2016 | -0.39 | 0.04 | 0.025156 | 0.00063282 | 21.91732 | 0.026422 | 37.77 |
| 601579 | 2016 | 0.046 | 0.04 | 0.025156 | 0.00063282 | 21.96238 | 0.049036 | 32.97 |
| 2617   | 2016 | -0.04 | 0.04 | 0.025156 | 0.00063282 | 21.91732 | 0.026422 | 37.77 |
| 600387 | 2016 | -0.62 | 0.04 | 0.025156 | 0.00063282 | 22.82056 | -0.02565 | 22.31 |
| 600070 | 2016 | -0.73 | 0.04 | 0.025156 | 0.00063282 | 22.01994 | 0.057241 | 28.16 |
| 2203   | 2016 | -0.62 | 0.04 | 0.025156 | 0.00063282 | 23.26992 | 0.121604 | 48.41 |
| 2699   | 2016 | -0.3  | 0.04 | 0.025156 | 0.00063282 | 22.01762 | 0.053935 | 37.76 |
| 600580 | 2016 | -0.5  | 0.04 | 0.025156 | 0.00063282 | 23.50095 | 0.051651 | 32.8  |
| 2203   | 2016 | -0.63 | 0.04 | 0.025156 | 0.00063282 | 23.26992 | 0.121604 | 48.41 |
| 600261 | 2016 | -0.62 | 0.04 | 0.025156 | 0.00063282 | 22.06909 | 0.140092 | 32.14 |
| 2011   | 2016 | 0.036 | 0.04 | 0.025156 | 0.00063282 | 23.18957 | 0.017757 | 29.48 |
| 603311 | 2016 | 0.62  | 0.04 | 0.025156 | 0.00063282 | 20.56305 | 0.10146  | 50.7  |
| 600580 | 2016 | -0.37 | 0.04 | 0.025156 | 0.00063282 | 23.50095 | 0.051651 | 32.8  |
| 600070 | 2016 | -0.43 | 0.04 | 0.025156 | 0.00063282 | 22.01994 | 0.057241 | 28.16 |
| 2602   | 2016 | 0.381 | 0.04 | 0.025156 | 0.00063282 | 22.42873 | 0.115289 | 26.58 |
| 600059 | 2016 | -0.4  | 0.04 | 0.025156 | 0.00063282 | 22.24219 | 0.030955 | 41.39 |
| 600790 | 2016 | 0.085 | 0.04 | 0.025156 | 0.00063282 | 22.60321 | 0.075365 | 35.78 |
| 2375   | 2016 | -0.38 | 0.04 | 0.025156 | 0.00063282 | 23.65306 | 0.045262 | 32.77 |
| 2590   | 2016 | -0.71 | 0.04 | 0.025156 | 0.00063282 | 21.88521 | 0.074952 | 45.86 |
| 600059 | 2016 | -0.4  | 0.04 | 0.025156 | 0.00063282 | 22.24219 | 0.030955 | 41.39 |
| 2085   | 2016 | -0.35 | 0.04 | 0.025156 | 0.00063282 | 22.95205 | 0.188056 | 45.69 |
| 603311 | 2016 | 0.355 | 0.04 | 0.025156 | 0.00063282 | 20.56305 | 0.10146  | 50.7  |
| 600059 | 2016 | -0.93 | 0.04 | 0.025156 | 0.00063282 | 22.24219 | 0.030955 | 41.39 |
| 603008 | 2016 | -0.77 | 0.04 | 0.025156 | 0.00063282 | 21.95912 | 0.08419  | 25.57 |
| 2590   | 2016 | -0.76 | 0.04 | 0.025156 | 0.00063282 | 21.88521 | 0.074952 | 45.86 |
| 2203   | 2016 | -0.64 | 0.04 | 0.025156 | 0.00063282 | 23.26992 | 0.121604 | 48.41 |
| 2085   | 2016 | -0.68 | 0.04 | 0.025156 | 0.00063282 | 22.95205 | 0.188056 | 45.69 |
| 2440   | 2016 | 0.659 | 0.04 | 0.025156 | 0.00063282 | 22.30673 | 0.102946 | 16.73 |
| 600059 | 2016 | -0.6  | 0.04 | 0.025156 | 0.00063282 | 22.24219 | 0.030955 | 41.39 |
| 603008 | 2016 | -0.76 | 0.04 | 0.025156 | 0.00063282 | 22.19952 | 0.08419  | 25.57 |
| 2006   | 2016 | -0.4  | 0.04 | 0.025156 | 6.33E-04   | 21.17364 | 0.061159 | 30.16 |
| 600580 | 2016 | -0.42 | 0.04 | 0.025156 | 6.33E-04   | 23.50095 | 0.051651 | 32.8  |
| 2590   | 2016 | -0.47 | 0.04 | 0.025156 | 6.33E-04   | 21.88521 | 0.074952 | 45.86 |
| 2224   | 2016 | 0.202 | 0.04 | 0.025156 | 6.33E-04   | 21.2953  | 0.137955 | 34.99 |
| 603008 | 2016 | -0.13 | 0.04 | 0.025156 | 6.33E-04   | 22.19952 | 0.08419  | 25.57 |
| 2263   | 2016 | 0.665 | 0.04 | 0.025156 | 0.00063282 | 22.10231 | -0.06892 | 23.14 |



|        |      |       |      |          |            |          |          |       |
|--------|------|-------|------|----------|------------|----------|----------|-------|
| 2633   | 2016 | -0.58 | 0.04 | 0.025156 | 0.00063282 | 20.22431 | -0.04988 | 28.12 |
| 600580 | 2016 | -0.15 | 0.04 | 0.025156 | 0.00063282 | 23.50095 | 0.051651 | 32.8  |
| 2520   | 2016 | 0.223 | 0.04 | 0.025156 | 0.00063282 | 21.57826 | 0.03057  | 44.78 |
| 600526 | 2016 | -0.1  | 0.04 | 0.025156 | 0.00063282 | 22.79924 | 0.019023 | 25.67 |
| 2602   | 2016 | 0.381 | 0.04 | 0.025156 | 0.00063282 | 22.08747 | 0.115289 | 26.58 |
| 600352 | 2016 | 0.479 | 0.04 | 0.025156 | 0.00063282 | 24.41056 | 0.142931 | 11.98 |
| 2224   | 2016 | 0.202 | 0.04 | 0.025156 | 0.00063282 | 21.2953  | 0.137955 | 34.99 |
| 2011   | 2016 | 0.607 | 0.04 | 0.025156 | 0.00063282 | 23.18957 | 0.017757 | 29.48 |
| 2370   | 2016 | 0.887 | 0.04 | 0.025156 | 0.00063282 | 21.62777 | 0.057983 | 26.77 |
| 2011   | 2016 | -0.72 | 0.04 | 0.025156 | 0.00063282 | 23.18957 | 0.017757 | 29.48 |
| 600526 | 2016 | 0.072 | 0.04 | 0.025156 | 0.00063282 | 22.79924 | 0.019023 | 25.67 |
| 2699   | 2016 | -0.31 | 0.04 | 0.025156 | 0.00063282 | 22.01762 | 0.053935 | 37.76 |
| 600352 | 2016 | -0.24 | 0.04 | 0.025156 | 0.00063282 | 24.41056 | 0.142931 | 11.98 |
| 2085   | 2016 | -0.15 | 0.04 | 0.025156 | 0.00063282 | 22.95205 | 0.188056 | 45.69 |
| 2375   | 2016 | -0.5  | 0.04 | 0.025156 | 0.00063282 | 23.65306 | 0.045262 | 32.77 |
| 2590   | 2016 | -0.38 | 0.04 | 0.025156 | 0.00063282 | 21.88521 | 0.074952 | 45.86 |
| 2203   | 2016 | 0.077 | 0.04 | 0.025156 | 0.00063282 | 23.26992 | 0.121604 | 48.41 |
| 2011   | 2016 | 0.229 | 0.04 | 0.025156 | 0.00063282 | 23.18957 | 0.017757 | 29.48 |
| 2370   | 2016 | 0.887 | 0.04 | 0.025156 | 0.00063282 | 21.50183 | 0.057983 | 26.77 |
| 2020   | 2016 | 0.444 | 0.04 | 0.025156 | 0.00063282 | 21.73119 | 0.083737 | 23.16 |
| 600352 | 2016 | -0.06 | 0.04 | 0.025156 | 0.00063282 | 23.6509  | 0.142931 | 11.98 |
| 2011   | 2016 | 0.036 | 0.04 | 0.025156 | 0.00063282 | 23.18957 | 0.017757 | 29.48 |
| 2085   | 2016 | -0.47 | 0.04 | 0.025156 | 0.00063282 | 22.95205 | 0.188056 | 45.69 |
| 2011   | 2016 | 0.229 | 0.04 | 0.025156 | 0.00063282 | 23.18957 | 0.017757 | 29.48 |
| 2574   | 2016 | -0.84 | 0.04 | 0.025156 | 0.00063282 | 22.31688 | 0.013811 | 29.96 |
| 601579 | 2016 | 0.046 | 0.04 | 0.025156 | 0.00063282 | 22.03156 | 0.049036 | 32.97 |
| 600216 | 2016 | 0.785 | 0.04 | 0.025156 | 0.00063282 | 22.89964 | 0.063552 | 21.53 |
| 2574   | 2016 | -0.84 | 0.04 | 0.025156 | 0.00063282 | 22.31688 | 0.013811 | 29.96 |
| 2590   | 2016 | -0.76 | 0.04 | 0.025156 | 0.00063282 | 21.88521 | 0.074952 | 45.86 |
| 2440   | 2016 | 0.659 | 0.04 | 0.025156 | 0.00063282 | 22.78243 | 0.102946 | 16.73 |
| 2050   | 2016 | 0.482 | 0.04 | 0.025156 | 0.00063282 | 22.85134 | 0.160595 | 43.76 |
| 2440   | 2016 | 0.659 | 0.04 | 0.025156 | 0.00063282 | 22.78243 | 0.102946 | 16.73 |
| 300316 | 2016 | -0.27 | 0.04 | 0.025156 | 0.00063282 | 22.14182 | 0.053399 | 48.46 |
| 2590   | 2016 | -0.38 | 0.04 | 0.025156 | 0.00063282 | 21.88521 | 0.074952 | 45.86 |
| 600352 | 2016 | -0.07 | 0.04 | 0.025156 | 0.00063282 | 24.41056 | 0.142931 | 11.98 |
| 601579 | 2016 | 0.046 | 0.04 | 0.025156 | 0.00063282 | 22.03156 | 0.049036 | 32.97 |
| 2590   | 2016 | -0.76 | 0.04 | 0.025156 | 0.00063282 | 21.88521 | 0.074952 | 45.86 |
| 2006   | 2016 | -0.62 | 0.04 | 0.025156 | 0.00063282 | 21.20511 | 0.061159 | 30.16 |
| 603311 | 2016 | -0.7  | 0.04 | 0.025156 | 0.00063282 | 20.56305 | 0.10146  | 50.7  |
| 300316 | 2016 | -0.15 | 0.04 | 0.025156 | 0.00063282 | 22.0654  | 0.053399 | 48.46 |
| 2520   | 2016 | -0.11 | 0.04 | 0.025156 | 0.00063282 | 21.57826 | 0.03057  | 44.78 |
| 600580 | 2016 | -0.7  | 0.04 | 0.025156 | 0.00063282 | 23.50095 | 0.051651 | 32.8  |
| 2574   | 2016 | -0.84 | 0.04 | 0.025156 | 0.00063282 | 22.31688 | 0.013811 | 29.96 |
| 2440   | 2016 | -0.03 | 0.04 | 0.025156 | 0.00063282 | 22.78243 | 0.102946 | 16.73 |
| 2050   | 2016 | 0.153 | 0.04 | 0.025156 | 0.00063282 | 22.85134 | 0.160595 | 43.76 |
| 2001   | 2016 | -0.13 | 0.04 | 0.025156 | 0.00063282 | 22.76207 | 0.151464 | 56.36 |
| 300316 | 2016 | -0.13 | 0.04 | 0.025156 | 0.00063282 | 22.14182 | 0.053399 | 48.46 |
| 600261 | 2016 | -0.24 | 0.04 | 0.025156 | 0.00063282 | 22.45326 | 0.140092 | 32.14 |
| 600580 | 2016 | -0.04 | 0.04 | 0.025156 | 0.00063282 | 23.50095 | 0.051651 | 32.8  |
| 2224   | 2016 | -0.32 | 0.04 | 0.025156 | 0.00063282 | 21.26601 | 0.137955 | 34.99 |
| 2006   | 2016 | -0.62 | 0.04 | 0.025156 | 0.00063282 | 21.20511 | 0.061159 | 30.16 |
| 2011   | 2016 | -0.72 | 0.04 | 0.025156 | 0.00063282 | 23.18957 | 0.017757 | 29.48 |
| 600387 | 2016 | -0.62 | 0.04 | 0.025156 | 0.00063282 | 22.82056 | -0.02565 | 22.31 |
| 600352 | 2016 | 0.616 | 0.04 | 0.025156 | 0.00063282 | 24.41056 | 0.142931 | 11.98 |

|        |      |       |      |          |            |          |          |       |
|--------|------|-------|------|----------|------------|----------|----------|-------|
| 2590   | 2016 | -0.57 | 0.04 | 0.025156 | 0.00063282 | 21.53178 | 0.074952 | 45.86 |
| 2085   | 2016 | -0.62 | 0.04 | 0.025156 | 0.00063282 | 22.95205 | 0.188056 | 45.69 |
| 2440   | 2016 | 0.659 | 0.04 | 0.025156 | 0.00063282 | 22.78243 | 0.102946 | 16.73 |
| 2590   | 2016 | 0.238 | 0.04 | 0.025156 | 0.00063282 | 21.88521 | 0.074952 | 45.86 |
| 2011   | 2016 | -0.72 | 0.04 | 0.025156 | 0.00063282 | 23.18957 | 0.017757 | 29.48 |
| 600216 | 2016 | 0.785 | 0.04 | 0.025156 | 0.00063282 | 22.89964 | 0.063552 | 21.53 |
| 2440   | 2016 | 0.659 | 0.04 | 0.025156 | 0.00063282 | 22.78243 | 0.102946 | 16.73 |
| 2203   | 2016 | -0.69 | 0.04 | 0.025156 | 0.00063282 | 23.26992 | 0.121604 | 48.41 |
| 2011   | 2016 | -0.72 | 0.04 | 0.025156 | 0.00063282 | 23.18957 | 0.017757 | 29.48 |
| 2085   | 2016 | -0.68 | 0.04 | 0.025156 | 0.00063282 | 22.95205 | 0.188056 | 45.69 |
| 2020   | 2016 | -0.35 | 0.04 | 0.025156 | 0.00063282 | 21.91434 | 0.083737 | 23.16 |
| 2001   | 2016 | 0.753 | 0.04 | 0.025156 | 0.00063282 | 22.76207 | 0.151464 | 56.36 |
| 600059 | 2016 | -0.4  | 0.04 | 0.025156 | 0.00063282 | 22.24219 | 0.030955 | 41.39 |
| 876    | 2016 | 0.224 | 0.01 | 0.235741 | 0.05557367 | 24.34454 | 0.122605 | 29.41 |
| 600839 | 2016 | -0.73 | 0.01 | 0.235741 | 0.05557367 | 24.81532 | 0.057888 | 23.2  |
| 876    | 2016 | 0.224 | 0.01 | 0.235741 | 0.05557367 | 24.34454 | 0.122605 | 29.41 |
| 300432 | 2016 | -0.29 | 0.01 | 0.235741 | 0.05557367 | 22.21937 | 0.065665 | 27.78 |
| 601208 | 2016 | -0.38 | 0.01 | 0.235741 | 0.05557367 | 21.84932 | 0.026784 | 22.96 |
| 300432 | 2016 | -0.03 | 0.01 | 0.235741 | 0.05557367 | 22.21937 | 0.065665 | 27.78 |
| 801    | 2016 | 0.156 | 0.01 | 0.235741 | 0.05557367 | 22.3542  | 0.083331 | 47.61 |
| 876    | 2016 | -0.14 | 0.01 | 0.235741 | 0.05557367 | 24.34454 | 0.122605 | 29.41 |
| 600839 | 2016 | -0.18 | 0.01 | 0.235741 | 0.05557367 | 24.81532 | 0.057888 | 23.2  |
| 600839 | 2016 | -0.31 | 0.01 | 0.235741 | 0.05557367 | 24.81532 | 0.057888 | 23.2  |
| 600839 | 2016 | -0.73 | 0.01 | 0.235741 | 0.05557367 | 24.81532 | 0.057888 | 23.2  |
| 2258   | 2016 | 0.607 | 0.01 | 0.235741 | 0.05557367 | 21.60144 | 0.097348 | 27.36 |
| 300432 | 2016 | -0.54 | 0.01 | 0.235741 | 0.05557367 | 22.21937 | 0.065665 | 27.78 |
| 601208 | 2016 | 0.641 | 0.01 | 0.235741 | 0.05557367 | 21.84932 | 0.026784 | 22.96 |
| 600839 | 2016 | -0.64 | 0.01 | 0.235741 | 0.05557367 | 24.81532 | 0.057888 | 23.2  |
| 300432 | 2016 | -0.29 | 0.01 | 0.235741 | 0.05557367 | 22.13279 | 0.065665 | 27.78 |
| 600839 | 2016 | -0.41 | 0.01 | 0.235741 | 0.05557367 | 24.81532 | 0.057888 | 23.2  |
| 2357   | 2016 | -0.17 | 0.01 | 0.235741 | 0.05557367 | 21.55196 | 0.08616  | 39.86 |
| 600839 | 2016 | -0.73 | 0.01 | 0.235741 | 0.05557367 | 24.81532 | 0.057888 | 23.2  |
| 600139 | 2016 | -0.42 | 0.01 | 0.235741 | 0.05557367 | 22.52738 | -0.09055 | 40.46 |
| 600839 | 2016 | -0.18 | 0.01 | 0.235741 | 0.05557367 | 24.81532 | 0.057888 | 23.2  |
| 601208 | 2016 | 0.126 | 0.01 | 0.235741 | 0.05557367 | 21.84932 | 0.026784 | 22.96 |
| 601208 | 2016 | 0.813 | 0.01 | 0.235741 | 0.05557367 | 21.84932 | 0.026784 | 22.96 |
| 2258   | 2016 | 0.652 | 0.01 | 0.235741 | 0.05557367 | 21.85996 | 0.097348 | 27.36 |
| 2258   | 2016 | 0.652 | 0.01 | 0.235741 | 0.05557367 | 21.85996 | 0.097348 | 27.36 |
| 600839 | 2016 | -0.46 | 0.01 | 0.235741 | 0.05557367 | 24.81532 | 0.057888 | 23.2  |
| 801    | 2016 | -0.35 | 0.01 | 0.235741 | 0.05557367 | 22.3542  | 0.083331 | 47.61 |
| 801    | 2016 | 0.237 | 0.01 | 0.235741 | 0.05557367 | 22.3542  | 0.083331 | 47.61 |
| 801    | 2016 | 0.312 | 0.01 | 0.235741 | 0.05557367 | 22.3542  | 0.083331 | 47.61 |
| 601208 | 2016 | 0.813 | 0.01 | 0.235741 | 0.05557367 | 21.60776 | 0.026784 | 22.96 |
| 2258   | 2016 | 0.609 | 0.01 | 0.235741 | 0.05557367 | 21.85996 | 0.097348 | 27.36 |
| 600839 | 2016 | -0.56 | 0.01 | 0.235741 | 0.05557367 | 24.81532 | 0.057888 | 23.2  |
| 600839 | 2016 | 0.098 | 0.01 | 0.235741 | 0.05557367 | 24.81532 | 0.057888 | 23.2  |
| 2258   | 2016 | -0.03 | 0.01 | 0.235741 | 0.05557367 | 21.85996 | 0.097348 | 27.36 |
| 2258   | 2016 | 0.598 | 0.01 | 0.235741 | 0.05557367 | 21.85996 | 0.097348 | 27.36 |
| 876    | 2016 | 0.224 | 0.01 | 0.235741 | 0.05557367 | 24.34454 | 0.122605 | 29.41 |
| 600839 | 2016 | -0.43 | 0.01 | 0.235741 | 0.05557367 | 24.81532 | 0.057888 | 23.2  |
| 876    | 2016 | 0.176 | 0.01 | 0.235741 | 0.05557367 | 24.34454 | 0.122605 | 29.41 |
| 600839 | 2016 | -0.15 | 0.01 | 0.235741 | 0.05557367 | 24.81532 | 0.057888 | 23.2  |
| 876    | 2016 | -0.72 | 0.01 | 0.235741 | 0.05557367 | 24.34454 | 0.122605 | 29.41 |
| 801    | 2016 | 0.537 | 0.01 | 0.235741 | 0.05557367 | 22.3542  | 0.083331 | 47.61 |

|        |      |       |      |          |            |          |          |       |
|--------|------|-------|------|----------|------------|----------|----------|-------|
| 876    | 2016 | -0.99 | 0.01 | 0.235741 | 0.05557367 | 24.34454 | 0.122605 | 29.41 |
| 2258   | 2016 | 0.652 | 0.01 | 0.235741 | 0.05557367 | 21.85996 | 0.097348 | 27.36 |
| 601208 | 2016 | 0.624 | 0.01 | 0.235741 | 0.05557367 | 21.84932 | 0.026784 | 22.96 |
| 601208 | 2016 | 0.624 | 0.01 | 0.235741 | 0.05557367 | 21.84932 | 0.026784 | 22.96 |
| 801    | 2016 | 0.504 | 0.01 | 0.235741 | 0.05557367 | 22.3542  | 0.083331 | 47.61 |
| 600839 | 2016 | -0.31 | 0.01 | 0.235741 | 0.05557367 | 24.81532 | 0.057888 | 23.2  |
| 600839 | 2016 | -0.73 | 0.01 | 0.235741 | 0.05557367 | 24.81532 | 0.057888 | 23.2  |
| 601208 | 2016 | 0.428 | 0.01 | 0.235741 | 0.05557367 | 21.84932 | 0.026784 | 22.96 |
| 600139 | 2016 | -0.58 | 0.01 | 0.235741 | 0.05557367 | 21.53646 | -0.09055 | 40.46 |
| 600139 | 2016 | -0.45 | 0.01 | 0.235741 | 0.05557367 | 22.52738 | -0.09055 | 40.46 |
| 600839 | 2016 | -0.18 | 0.01 | 0.235741 | 0.05557367 | 24.81532 | 0.057888 | 23.2  |
| 300432 | 2016 | -0.29 | 0.01 | 0.235741 | 0.05557367 | 22.21937 | 0.065665 | 27.78 |
| 600839 | 2016 | -0.12 | 0.01 | 0.235741 | 0.05557367 | 24.81532 | 0.057888 | 23.2  |
| 600839 | 2016 | -0.65 | 0.01 | 0.235741 | 0.05557367 | 24.05229 | 0.057888 | 23.2  |
| 300432 | 2016 | -0.03 | 0.01 | 0.235741 | 0.05557367 | 22.21937 | 0.065665 | 27.78 |
| 801    | 2016 | 0.504 | 0.01 | 0.235741 | 0.05557367 | 22.3542  | 0.083331 | 47.61 |
| 601208 | 2016 | 0.813 | 0.01 | 0.235741 | 0.05557367 | 21.84932 | 0.026784 | 22.96 |
| 801    | 2016 | 0.853 | 0.01 | 0.235741 | 0.05557367 | 22.3542  | 0.083331 | 47.61 |
| 2357   | 2016 | -0.17 | 0.01 | 0.235741 | 0.05557367 | 21.79358 | 0.08616  | 39.86 |
| 600839 | 2016 | -0.73 | 0.01 | 0.235741 | 0.05557367 | 24.81532 | 0.057888 | 23.2  |
| 600839 | 2016 | -0.73 | 0.01 | 0.235741 | 0.05557367 | 24.81532 | 0.057888 | 23.2  |
| 601208 | 2016 | 0.271 | 0.01 | 0.235741 | 0.05557367 | 21.84932 | 0.026784 | 22.96 |
| 600839 | 2016 | -0.73 | 0.01 | 0.235741 | 0.05557367 | 24.81532 | 0.057888 | 23.2  |
| 801    | 2016 | 0.504 | 0.01 | 0.235741 | 0.05557367 | 22.3542  | 0.083331 | 47.61 |
| 801    | 2016 | 0.504 | 0.01 | 0.235741 | 0.05557367 | 22.3542  | 0.083331 | 47.61 |
| 300432 | 2016 | -0.03 | 0.01 | 0.235741 | 0.05557367 | 22.21937 | 0.065665 | 27.78 |
| 300432 | 2016 | -0.29 | 0.01 | 0.235741 | 0.05557367 | 22.21937 | 0.065665 | 27.78 |
| 876    | 2016 | 0.146 | 0.01 | 0.235741 | 0.05557367 | 23.69262 | 0.122605 | 29.41 |
| 600139 | 2016 | -0.45 | 0.01 | 0.235741 | 0.05557367 | 22.52738 | -0.09055 | 40.46 |
| 876    | 2016 | -0.72 | 0.01 | 0.235741 | 0.05557367 | 24.34454 | 0.122605 | 29.41 |
| 600839 | 2016 | -0.41 | 0.01 | 0.235741 | 0.05557367 | 24.81532 | 0.057888 | 23.2  |
| 600839 | 2016 | -0.73 | 0.01 | 0.235741 | 0.05557367 | 24.81532 | 0.057888 | 23.2  |
| 2357   | 2016 | -0.17 | 0.01 | 0.235741 | 0.05557367 | 21.79358 | 0.08616  | 39.86 |
| 600839 | 2016 | -0.48 | 0.01 | 0.235741 | 0.05557367 | 24.81532 | 0.057888 | 23.2  |
| 876    | 2016 | 0.2   | 0.01 | 0.235741 | 0.05557367 | 24.34454 | 0.122605 | 29.41 |
| 801    | 2016 | 0.504 | 0.01 | 0.235741 | 0.05557367 | 21.42625 | 0.083331 | 47.61 |
| 600839 | 2016 | 0.596 | 0.01 | 0.235741 | 0.05557367 | 24.81532 | 0.057888 | 23.2  |
| 600839 | 2016 | -0.31 | 0.01 | 0.235741 | 0.05557367 | 24.81532 | 0.057888 | 23.2  |
| 601208 | 2016 | 0.813 | 0.01 | 0.235741 | 0.05557367 | 21.84932 | 0.026784 | 22.96 |
| 957    | 2016 | -0.37 | 0    | 1.049659 | 1.1017834  | 22.81291 | 0.226462 | 21.07 |
| 830    | 2016 | 0.672 | 0    | 1.049659 | 1.1017834  | 23.94472 | 0.029231 | 33.6  |
| 957    | 2016 | -0.23 | 0    | 1.049659 | 1.1017834  | 22.77753 | 0.226462 | 21.07 |
| 300121 | 2016 | 0.83  | 0    | 1.049659 | 1.1017834  | 21.06826 | 0.24016  | 38.97 |
| 830    | 2016 | 0.054 | 0    | 1.049659 | 1.1017834  | 23.94472 | 0.029231 | 33.6  |
| 830    | 2016 | 0.672 | 0    | 1.049659 | 1.1017834  | 23.94472 | 0.029231 | 33.6  |
| 830    | 2016 | -0.49 | 0    | 1.049659 | 1.1017834  | 23.94472 | 0.029231 | 33.6  |
| 957    | 2016 | -0.23 | 0    | 1.049659 | 1.1017834  | 22.81291 | 0.226462 | 21.07 |
| 423    | 2016 | -0.2  | 0    | 1.049659 | 1.1017834  | 23.0208  | 0.221215 | 23.14 |
| 957    | 2016 | -0.25 | 0    | 1.049659 | 1.1017834  | 22.81291 | 0.226462 | 21.07 |
| 957    | 2016 | -0.23 | 0    | 1.049659 | 1.1017834  | 22.81291 | 0.226462 | 21.07 |
| 300121 | 2016 | 0.438 | 0    | 1.049659 | 1.1017834  | 20.91773 | 0.24016  | 38.97 |
| 830    | 2016 | 0.672 | 0    | 1.049659 | 1.1017834  | 23.94472 | 0.029231 | 33.6  |
| 423    | 2016 | -0.47 | 0    | 1.049659 | 1.1017834  | 22.98729 | 0.221215 | 23.14 |
| 830    | 2016 | 0.381 | 0    | 1.049659 | 1.1017834  | 23.94472 | 0.029231 | 33.6  |

|        |      |       |      |          |            |          |          |       |
|--------|------|-------|------|----------|------------|----------|----------|-------|
| 830    | 2016 | 0.672 | 0    | 1.049659 | 1.1017834  | 23.94472 | 0.029231 | 33.6  |
| 830    | 2016 | 0.672 | 0    | 1.049659 | 1.1017834  | 23.8153  | 0.029231 | 33.6  |
| 830    | 2016 | 0.672 | 0    | 1.049659 | 1.1017834  | 23.94472 | 0.029231 | 33.6  |
| 830    | 2016 | -0.65 | 0    | 1.049659 | 1.1017834  | 23.94472 | 0.029231 | 33.6  |
| 830    | 2016 | 0.672 | 0    | 1.049659 | 1.1017834  | 23.94472 | 0.029231 | 33.6  |
| 830    | 2016 | 0.672 | 0    | 1.049659 | 1.1017834  | 23.94472 | 0.029231 | 33.6  |
| 830    | 2016 | -0.01 | 0    | 1.049659 | 1.1017834  | 23.94472 | 0.029231 | 33.6  |
| 957    | 2016 | -0.37 | 0    | 1.049659 | 1.1017834  | 22.81291 | 0.226462 | 21.07 |
| 830    | 2016 | 0.443 | 0    | 1.049659 | 1.1017834  | 23.94472 | 0.029231 | 33.6  |
| 423    | 2016 | -0.2  | 0    | 1.049659 | 1.1017834  | 23.0208  | 0.221215 | 23.14 |
| 300121 | 2016 | 0.438 | 0    | 1.049659 | 1.1017834  | 21.06826 | 0.24016  | 38.97 |
| 830    | 2016 | 0.01  | 0    | 1.049659 | 1.1017834  | 23.94472 | 0.029231 | 33.6  |
| 830    | 2016 | 0.672 | 0    | 1.049659 | 1.1017834  | 23.94472 | 0.029231 | 33.6  |
| 830    | 2016 | 0.672 | 0    | 1.049659 | 1.1017834  | 23.94472 | 0.029231 | 33.6  |
| 830    | 2016 | -0.49 | 0    | 1.049659 | 1.1017834  | 23.94472 | 0.029231 | 33.6  |
| 423    | 2016 | 0.254 | 0    | 1.049659 | 1.1017834  | 23.0208  | 0.221215 | 23.14 |
| 423    | 2016 | -0.33 | 0    | 1.049659 | 1.1017834  | 22.98729 | 0.221215 | 23.14 |
| 423    | 2016 | -0.22 | 0    | 1.049659 | 1.1017834  | 22.98729 | 0.221215 | 23.14 |
| 830    | 2016 | 0.672 | 0    | 1.049659 | 1.1017834  | 23.94472 | 0.029231 | 33.6  |
| 830    | 2016 | 0.01  | 0    | 1.049659 | 1.1017834  | 23.94472 | 0.029231 | 33.6  |
| 830    | 2016 | 0.397 | 0    | 1.049659 | 1.1017834  | 23.94472 | 0.029231 | 33.6  |
| 300121 | 2016 | 0.83  | 0    | 1.049659 | 1.1017834  | 21.06826 | 0.24016  | 38.97 |
| 300121 | 2016 | 0.468 | 0    | 1.049659 | 1.1017834  | 21.06826 | 0.24016  | 38.97 |
| 636    | 2016 | -0.11 | 0.05 | 0.025156 | 0.00063282 | 22.61675 | 0.02067  | 20.03 |
| 636    | 2016 | -0.11 | 0.05 | 0.025156 | 0.00063282 | 22.60075 | 0.02067  | 20.03 |
| 2101   | 2016 | -0.42 | 0.05 | 0.025156 | 0.00063282 | 22.05491 | 0.077355 | 16.8  |
| 636    | 2016 | -0.11 | 0.05 | 0.025156 | 0.00063282 | 22.61675 | 0.02067  | 20.03 |
| 300176 | 2016 | -0.62 | 0.05 | 0.025156 | 0.00063282 | 21.16734 | 0.078584 | 29.23 |
| 2715   | 2016 | 0.082 | 0.05 | 0.025156 | 0.00063282 | 20.36015 | 0.025484 | 12.91 |
| 2101   | 2016 | -0.57 | 0.05 | 0.025156 | 0.00063282 | 22.05491 | 0.077355 | 16.8  |
| 600866 | 2016 | 0.689 | 0.05 | 0.025156 | 0.00063282 | 21.25994 | 0.022665 | 14.94 |
| 2101   | 2016 | 0.378 | 0.05 | 0.025156 | 0.00063282 | 22.05491 | 0.077355 | 16.8  |
| 300063 | 2016 | -0.82 | 0.05 | 0.025156 | 0.00063282 | 22.02805 | 0.06191  | 23.5  |
| 2101   | 2016 | 0.756 | 0.05 | 0.025156 | 0.00063282 | 22.05491 | 0.077355 | 16.8  |
| 300063 | 2016 | -0.82 | 0.05 | 0.025156 | 0.00063282 | 22.02805 | 0.06191  | 23.5  |
| 300176 | 2016 | -0.62 | 0.05 | 0.025156 | 0.00063282 | 21.31684 | 0.078584 | 29.23 |
| 2101   | 2016 | -0.4  | 0.05 | 0.025156 | 0.00063282 | 22.05491 | 0.077355 | 16.8  |
| 600866 | 2016 | 0.229 | 0.05 | 0.025156 | 0.00063282 | 21.25994 | 0.022665 | 14.94 |
| 300176 | 2016 | -0.62 | 0.05 | 0.025156 | 0.00063282 | 21.31684 | 0.078584 | 29.23 |
| 636    | 2016 | -0.11 | 0.05 | 0.025156 | 0.00063282 | 22.61675 | 0.02067  | 20.03 |
| 2715   | 2016 | 0.082 | 0.05 | 0.025156 | 0.00063282 | 20.36416 | 0.025484 | 12.91 |
| 2715   | 2016 | 0.082 | 0.05 | 0.025156 | 0.00063282 | 20.36416 | 0.025484 | 12.91 |
| 636    | 2016 | -0.31 | 0.05 | 0.025156 | 0.00063282 | 22.61675 | 0.02067  | 20.03 |
| 636    | 2016 | 0.138 | 0.05 | 0.025156 | 0.00063282 | 22.61675 | 0.02067  | 20.03 |
| 300063 | 2016 | -0.82 | 0.05 | 0.025156 | 0.00063282 | 22.02805 | 0.06191  | 23.5  |
| 300063 | 2016 | -0.82 | 0.05 | 0.025156 | 0.00063282 | 21.67646 | 0.06191  | 23.5  |
| 636    | 2016 | -0.11 | 0.05 | 0.025156 | 0.00063282 | 22.61675 | 0.02067  | 20.03 |
| 636    | 2016 | 0.17  | 0.05 | 0.025156 | 0.00063282 | 22.61675 | 0.02067  | 20.03 |
| 636    | 2016 | 0.717 | 0.05 | 0.025156 | 0.00063282 | 22.61675 | 0.02067  | 20.03 |
| 636    | 2016 | 0.373 | 0.05 | 0.025156 | 0.00063282 | 22.61675 | 0.02067  | 20.03 |
| 300063 | 2016 | 0.51  | 0.05 | 0.025156 | 0.00063282 | 22.02805 | 0.06191  | 23.5  |
| 300063 | 2016 | -0.74 | 0.05 | 0.025156 | 0.00063282 | 22.02805 | 0.06191  | 23.5  |
| 300063 | 2016 | -0.82 | 0.05 | 0.025156 | 0.00063282 | 22.02805 | 0.06191  | 23.5  |
| 300176 | 2016 | -0.62 | 0.05 | 0.025156 | 0.00063282 | 21.31684 | 0.078584 | 29.23 |

|        |      |       |      |          |            |          |          |       |
|--------|------|-------|------|----------|------------|----------|----------|-------|
| 600866 | 2016 | 0.29  | 0.05 | 0.025156 | 0.00063282 | 21.36044 | 0.022665 | 14.94 |
| 600866 | 2016 | 0.689 | 0.05 | 0.025156 | 0.00063282 | 21.25994 | 0.022665 | 14.94 |
| 2101   | 2016 | 0.378 | 0.05 | 0.025156 | 0.00063282 | 22.05491 | 0.077355 | 16.8  |
| 600866 | 2016 | 0.229 | 0.05 | 0.025156 | 0.00063282 | 21.25994 | 0.022665 | 14.94 |
| 2101   | 2016 | -0.17 | 0.05 | 0.025156 | 0.00063282 | 21.87657 | 0.077355 | 16.8  |
| 636    | 2016 | 0.17  | 0.05 | 0.025156 | 0.00063282 | 22.61675 | 0.02067  | 20.03 |
| 636    | 2016 | 0.488 | 0.05 | 0.025156 | 0.00063282 | 22.61675 | 0.02067  | 20.03 |
| 636    | 2016 | -0.11 | 0.05 | 0.025156 | 0.00063282 | 22.61675 | 0.02067  | 20.03 |
| 300063 | 2016 | -0.74 | 0.05 | 0.025156 | 0.00063282 | 22.02805 | 0.06191  | 23.5  |
| 636    | 2016 | 0.03  | 0.05 | 0.025156 | 0.00063282 | 22.61675 | 0.02067  | 20.03 |
| 300176 | 2016 | -0.62 | 0.05 | 0.025156 | 0.00063282 | 21.31684 | 0.078584 | 29.23 |
| 2630   | 2016 | -0.38 | 0.01 | 0.878695 | 0.77210524 | 23.08633 | 0.065088 | 23.05 |
| 2272   | 2016 | -0.52 | 0.01 | 0.878695 | 0.77210524 | 21.21733 | 0.01246  | 18.15 |
| 2272   | 2016 | -0.74 | 0.01 | 0.878695 | 0.77210524 | 21.21733 | 0.01246  | 18.15 |
| 2272   | 2016 | -0.52 | 0.01 | 0.878695 | 0.77210524 | 20.9262  | 0.01246  | 18.15 |
| 600558 | 2016 | 0.793 | 0.01 | 0.878695 | 0.77210524 | 21.70932 | 0.026628 | 33.14 |
| 600558 | 2016 | -0.48 | 0.01 | 0.878695 | 0.77210524 | 21.70932 | 0.026628 | 33.14 |
| 600558 | 2016 | 0.408 | 0.01 | 0.878695 | 0.77210524 | 21.70932 | 0.026628 | 33.14 |
| 600558 | 2016 | -0.48 | 0.01 | 0.878695 | 0.77210524 | 21.70932 | 0.026628 | 33.14 |
| 600558 | 2016 | 0.842 | 0.01 | 0.878695 | 0.77210524 | 21.70932 | 0.026628 | 33.14 |
| 2630   | 2016 | -0.26 | 0.01 | 0.878695 | 0.77210524 | 23.08633 | 0.065088 | 23.05 |
| 2630   | 2016 | -0.3  | 0.01 | 0.878695 | 0.77210524 | 23.08633 | 0.065088 | 23.05 |
| 2272   | 2016 | -0.48 | 0.01 | 0.878695 | 0.77210524 | 21.21733 | 0.01246  | 18.15 |
| 600558 | 2016 | 0.793 | 0.01 | 0.878695 | 0.77210524 | 21.70932 | 0.026628 | 33.14 |
| 2630   | 2016 | -0.3  | 0.01 | 0.878695 | 0.77210524 | 22.94965 | 0.065088 | 23.05 |
| 2630   | 2016 | 0.171 | 0.01 | 0.878695 | 0.77210524 | 23.08633 | 0.065088 | 23.05 |
| 600558 | 2016 | 0.842 | 0.01 | 0.878695 | 0.77210524 | 21.70932 | 0.026628 | 33.14 |
| 600558 | 2016 | 0.842 | 0.01 | 0.878695 | 0.77210524 | 21.42897 | 0.026628 | 33.14 |
| 2272   | 2016 | -0.48 | 0.01 | 0.878695 | 0.77210524 | 21.21733 | 0.01246  | 18.15 |
| 2630   | 2016 | 0.171 | 0.01 | 0.878695 | 0.77210524 | 23.08633 | 0.065088 | 23.05 |
| 2272   | 2016 | -0.48 | 0.01 | 0.878695 | 0.77210524 | 21.21733 | 0.01246  | 18.15 |
| 2630   | 2016 | -0.38 | 0.01 | 0.878695 | 0.77210524 | 23.08633 | 0.065088 | 23.05 |
| 2630   | 2016 | 0.171 | 0.01 | 0.878695 | 0.77210524 | 23.08633 | 0.065088 | 23.05 |
| 2272   | 2016 | -0.48 | 0.01 | 0.878695 | 0.77210524 | 21.21733 | 0.01246  | 18.15 |
| 2435   | 2016 | -0.19 | 0.01 | 1.265644 | 1.6018553  | 22.49594 | 0.059093 | 36.81 |
| 2435   | 2016 | -0.19 | 0.01 | 1.265644 | 1.6018553  | 22.49594 | 0.059093 | 36.81 |
| 2079   | 2016 | -0.04 | 0.01 | 1.265644 | 1.6018553  | 21.28632 | 0.087356 | 34.28 |
| 551    | 2016 | -0.23 | 0.01 | 1.265644 | 1.6018553  | 22.11234 | 0.052058 | 34.33 |
| 2245   | 2016 | -0    | 0.01 | 1.265644 | 1.6018553  | 21.89366 | 0.098688 | 32.59 |
| 300261 | 2016 | 1.173 | 0.01 | 1.265644 | 1.6018553  | 21.36271 | 0.018856 | 42.82 |
| 2384   | 2016 | -0.1  | 0.01 | 1.265644 | 1.6018553  | 23.44053 | 0.054295 | 23.26 |
| 2463   | 2016 | -0.43 | 0.01 | 1.265644 | 1.6018553  | 22.39542 | 0.038783 | 20.19 |
| 2426   | 2016 | 0.043 | 0.01 | 1.265644 | 1.6018553  | 23.52926 | 0.054352 | 27.69 |
| 300215 | 2016 | -0.05 | 0.01 | 1.265644 | 1.6018553  | 22.04231 | 0.037283 | 28.35 |
| 2333   | 2016 | -0.42 | 0.01 | 1.265644 | 1.6018553  | 21.28807 | 0.090247 | 65.46 |
| 300292 | 2016 | 0.077 | 0.01 | 1.265644 | 1.6018553  | 21.93332 | 0.066002 | 23.55 |
| 2491   | 2016 | -0.07 | 0.01 | 1.265644 | 1.6018553  | 22.6314  | 0.187584 | 38.41 |
| 2387   | 2016 | -0.81 | 0.01 | 1.265644 | 1.6018553  | 20.93577 | 0.034754 | 29.82 |
| 300260 | 2016 | -0.53 | 0.01 | 1.265644 | 1.6018553  | 20.73207 | 0.014517 | 28.38 |
| 551    | 2016 | -0.23 | 0.01 | 1.265644 | 1.6018553  | 22.11234 | 0.052058 | 34.33 |
| 2426   | 2016 | -0.06 | 0.01 | 1.265644 | 1.6018553  | 23.52926 | 0.054352 | 27.69 |
| 2787   | 2016 | -0.3  | 0.01 | 1.265644 | 1.6018553  | 20.91213 | 0.113299 | 43.18 |
| 603828 | 2016 | -0.15 | 0.01 | 1.265644 | 1.6018553  | 21.79709 | 0.050633 | 37.4  |
| 600105 | 2016 | -0.32 | 0.01 | 1.265644 | 1.6018553  | 22.14018 | 0.10373  | 37.19 |

|        |      |       |      |          |           |          |          |       |
|--------|------|-------|------|----------|-----------|----------|----------|-------|
| 2435   | 2016 | -0.19 | 0.01 | 1.265644 | 1.6018553 | 22.49594 | 0.059093 | 36.81 |
| 2426   | 2016 | -0.4  | 0.01 | 1.265644 | 1.6018553 | 23.52926 | 0.054352 | 27.69 |
| 603017 | 2016 | 0.733 | 0.01 | 1.265644 | 1.6018553 | 21.4905  | 0.080092 | 36.84 |
| 2333   | 2016 | -0.42 | 0.01 | 1.265644 | 1.6018553 | 21.28985 | 0.090247 | 65.46 |
| 2367   | 2016 | -0.14 | 0.01 | 1.265644 | 1.6018553 | 22.37362 | 0.121874 | 44.96 |
| 600487 | 2016 | -0.33 | 0.01 | 1.265644 | 1.6018553 | 23.70563 | 0.224366 | 19.34 |
| 2255   | 2016 | 0.004 | 0.01 | 1.265644 | 1.6018553 | 22.02898 | 0.033979 | 15.5  |
| 300393 | 2016 | -0.21 | 0.01 | 1.265644 | 1.6018553 | 21.96732 | 0.165492 | 31.6  |
| 2631   | 2016 | 0.013 | 0.01 | 1.265644 | 1.6018553 | 21.38504 | 0.129724 | 54.86 |
| 300394 | 2016 | 0.432 | 0.01 | 1.265644 | 1.6018553 | 20.46512 | 0.160586 | 46.95 |
| 300141 | 2016 | -0.37 | 0.01 | 1.265644 | 1.6018553 | 20.68458 | 0.045781 | 45.41 |
| 2564   | 2016 | 0.185 | 0.01 | 1.265644 | 1.6018553 | 23.55676 | -0.11001 | 29.73 |
| 2519   | 2016 | -0.1  | 0.01 | 1.265644 | 1.6018553 | 22.30865 | 0.084693 | 30.31 |
| 603355 | 2016 | -0.28 | 0.01 | 1.265644 | 1.6018553 | 22.35157 | 0.168229 | 45.79 |
| 603005 | 2016 | 1.157 | 0.01 | 1.265644 | 1.6018553 | 21.3833  | 0.031508 | 25.21 |
| 2384   | 2016 | -0.3  | 0.01 | 1.265644 | 1.6018553 | 23.44053 | 0.054295 | 23.26 |
| 2384   | 2016 | -0.15 | 0.01 | 1.265644 | 1.6018553 | 23.44053 | 0.054295 | 23.26 |
| 2245   | 2016 | -0    | 0.01 | 1.265644 | 1.60E+00  | 22.33805 | 0.098688 | 32.59 |
| 2172   | 2016 | 0.183 | 0.01 | 1.265644 | 1.60E+00  | 22.13973 | 0.20452  | 49.1  |
| 300228 | 2016 | -0.14 | 0.01 | 1.265644 | 1.60E+00  | 22.09125 | -0.16623 | 10.47 |
| 300390 | 2016 | -0.45 | 0.01 | 1.265644 | 1.6018553 | 20.73802 | 0.021637 | 34.75 |
| 600200 | 2016 | 0.5   | 0.01 | 1.265644 | 1.6018553 | 22.3795  | 0.026293 | 17.01 |
| 2091   | 2016 | 0.232 | 0.01 | 1.265644 | 1.6018553 | 23.3767  | 0.202881 | 30.02 |
| 300261 | 2016 | 1.173 | 0.01 | 1.265644 | 1.6018553 | 21.36271 | 0.018856 | 42.82 |
| 2384   | 2016 | -0.17 | 0.01 | 1.265644 | 1.6018553 | 23.05069 | 0.054295 | 23.26 |
| 2453   | 2016 | 0.298 | 0.01 | 1.265644 | 1.6018553 | 21.52    | -0.26182 | 21.68 |
| 2426   | 2016 | -0.06 | 0.01 | 1.265644 | 1.6018553 | 23.52926 | 0.054352 | 27.69 |
| 600105 | 2016 | -0.21 | 0.01 | 1.265644 | 1.6018553 | 22.14018 | 0.10373  | 37.19 |
| 600487 | 2016 | -0.21 | 0.01 | 1.265644 | 1.6018553 | 23.70563 | 0.224366 | 19.34 |
| 2450   | 2016 | 0.627 | 0.01 | 1.265644 | 1.6018553 | 23.99758 | 0.125945 | 22.26 |
| 2453   | 2016 | 0.405 | 0.01 | 1.265644 | 1.6018553 | 21.52    | -0.26182 | 21.68 |
| 2531   | 2016 | -0.35 | 0.01 | 1.265644 | 1.6018553 | 22.79509 | 0.08835  | 29.81 |
| 2290   | 2016 | 0.295 | 0.01 | 1.265644 | 1.6018553 | 21.27862 | 0.023201 | 27.49 |
| 2089   | 2016 | 0.951 | 0.01 | 1.265644 | 1.6018553 | 22.02591 | 0.028052 | 18.05 |
| 300013 | 2016 | -0.62 | 0.01 | 1.265644 | 1.6018553 | 21.41402 | 0.044805 | 11.72 |
| 2426   | 2016 | 0.114 | 0.01 | 1.265644 | 1.6018553 | 23.52926 | 0.054352 | 27.69 |
| 2089   | 2016 | 0.951 | 0.01 | 1.265644 | 1.6018553 | 22.40511 | 0.028052 | 18.05 |
| 2309   | 2016 | 0.029 | 0.01 | 1.265644 | 1.6018553 | 23.93904 | 0.015717 | 41.76 |
| 2367   | 2016 | -0.33 | 0.01 | 1.265644 | 1.6018553 | 22.37362 | 0.121874 | 44.96 |
| 300416 | 2016 | 0.114 | 0.01 | 1.265644 | 1.6018553 | 20.45554 | 0.115216 | 47.77 |
| 300141 | 2016 | -0.37 | 0.01 | 1.265644 | 1.6018553 | 20.45683 | 0.045781 | 45.41 |
| 2367   | 2016 | 0.464 | 0.01 | 1.265644 | 1.6018553 | 22.37362 | 0.121874 | 44.96 |
| 2290   | 2016 | -0.41 | 0.01 | 1.265644 | 1.6018553 | 21.39331 | 0.023201 | 27.49 |
| 2309   | 2016 | 0.08  | 0.01 | 1.265644 | 1.6018553 | 23.93904 | 0.015717 | 41.76 |
| 2367   | 2016 | 0.034 | 0.01 | 1.265644 | 1.6018553 | 22.37362 | 0.121874 | 44.96 |
| 300165 | 2016 | 0.735 | 0.01 | 1.265644 | 1.6018553 | 21.46888 | 0.034526 | 37.34 |
| 2387   | 2016 | -0.81 | 0.01 | 1.265644 | 1.6018553 | 21.02837 | 0.034754 | 29.82 |
| 2450   | 2016 | 0.406 | 0.01 | 1.265644 | 1.6018553 | 23.99758 | 0.125945 | 22.26 |
| 600105 | 2016 | -0.54 | 0.01 | 1.265644 | 1.6018553 | 22.14018 | 0.10373  | 37.19 |
| 2564   | 2016 | -0.43 | 0.01 | 1.265644 | 1.6018553 | 23.55676 | -0.11001 | 29.73 |
| 603800 | 2016 | -0.35 | 0.01 | 1.265644 | 1.6018553 | 20.93217 | -0.0689  | 39.15 |
| 603355 | 2016 | -0.28 | 0.01 | 1.265644 | 1.6018553 | 22.35157 | 0.168229 | 45.79 |
| 2631   | 2016 | 0.652 | 0.01 | 1.265644 | 1.6018553 | 21.38504 | 0.129724 | 54.86 |
| 2499   | 2016 | -0.19 | 0.01 | 1.265644 | 1.6018553 | 20.77229 | 0.025435 | 19    |

|        |      |       |      |          |           |          |          |       |
|--------|------|-------|------|----------|-----------|----------|----------|-------|
| 2367   | 2016 | 0.021 | 0.01 | 1.265644 | 1.6018553 | 22.37362 | 0.121874 | 44.96 |
| 300394 | 2016 | 0.432 | 0.01 | 1.265644 | 1.6018553 | 20.51992 | 0.160586 | 46.95 |
| 600105 | 2016 | 0.233 | 0.01 | 1.265644 | 1.6018553 | 22.14018 | 0.10373  | 37.19 |
| 2635   | 2016 | -0.39 | 0.01 | 1.265644 | 1.6018553 | 21.90379 | 0.147533 | 35.18 |
| 300013 | 2016 | -0.62 | 0.01 | 1.265644 | 1.6018553 | 21.41402 | 0.044805 | 11.72 |
| 2367   | 2016 | 0.034 | 0.01 | 1.265644 | 1.6018553 | 22.37362 | 0.121874 | 44.96 |
| 2150   | 2016 | -0.81 | 0.01 | 1.265644 | 1.6018553 | 21.03941 | 0.099228 | 38.32 |
| 2160   | 2016 | 0.215 | 0.01 | 1.265644 | 1.6018553 | 22.46437 | 0.049007 | 25.42 |
| 603800 | 2016 | -0.35 | 0.01 | 1.265644 | 1.6018553 | 20.93888 | -0.0689  | 39.15 |
| 300382 | 2016 | 1.131 | 0.01 | 1.265644 | 1.6018553 | 20.92486 | 0.098661 | 64.91 |
| 2426   | 2016 | -0.4  | 0.01 | 1.265644 | 1.6018553 | 23.52926 | 0.054352 | 27.69 |
| 2564   | 2016 | -0.37 | 0.01 | 1.265644 | 1.6018553 | 23.55676 | -0.11001 | 29.73 |
| 2384   | 2016 | -0.01 | 0.01 | 1.265644 | 1.6018553 | 23.44053 | 0.054295 | 23.26 |
| 2564   | 2016 | -0.05 | 0.01 | 1.265644 | 1.6018553 | 23.55676 | -0.11001 | 29.73 |
| 2309   | 2016 | -0.07 | 0.01 | 1.265644 | 1.6018553 | 23.93904 | 0.015717 | 41.76 |
| 2384   | 2016 | -0.15 | 0.01 | 1.265644 | 1.6018553 | 23.44053 | 0.054295 | 23.26 |
| 2531   | 2016 | -0.47 | 0.01 | 1.265644 | 1.6018553 | 22.79509 | 0.08835  | 29.81 |
| 2160   | 2016 | 0.215 | 0.01 | 1.265644 | 1.6018553 | 22.29419 | 0.049007 | 25.42 |
| 2081   | 2016 | -0.02 | 0.01 | 1.265644 | 1.6018553 | 24.01251 | 0.167188 | 24.7  |
| 2079   | 2016 | 0.036 | 0.01 | 1.265644 | 1.6018553 | 21.28632 | 0.087356 | 34.28 |
| 2255   | 2016 | -0.1  | 0.01 | 1.265644 | 1.6018553 | 22.02898 | 0.033979 | 15.5  |
| 2435   | 2016 | -0.19 | 0.01 | 1.265644 | 1.6018553 | 22.38317 | 0.059093 | 36.81 |
| 2089   | 2016 | 0.391 | 0.01 | 1.265644 | 1.6018553 | 22.40511 | 0.028052 | 18.05 |
| 2091   | 2016 | -0.72 | 0.01 | 1.265644 | 1.6018553 | 23.3767  | 0.202881 | 30.02 |
| 2519   | 2016 | -0.05 | 0.01 | 1.265644 | 1.6018553 | 22.30865 | 0.084693 | 30.31 |
| 2652   | 2016 | -0.43 | 0.01 | 1.265644 | 1.6018553 | 21.55851 | 0.16866  | 37.5  |
| 2547   | 2016 | -0.63 | 0.01 | 1.265644 | 1.6018553 | 22.41742 | 0.076619 | 42.96 |
| 2245   | 2016 | -0.57 | 0.01 | 1.265644 | 1.6018553 | 22.33805 | 0.098688 | 32.59 |
| 600487 | 2016 | -0.06 | 0.01 | 1.265644 | 1.6018553 | 23.70563 | 0.224366 | 19.34 |
| 300013 | 2016 | -0.62 | 0.01 | 1.265644 | 1.6018553 | 21.41402 | 0.044805 | 11.72 |
| 2245   | 2016 | 0.017 | 0.01 | 1.265644 | 1.6018553 | 22.33805 | 0.098688 | 32.59 |
| 300261 | 2016 | 1.173 | 0.01 | 1.265644 | 1.6018553 | 21.36271 | 0.018856 | 42.82 |
| 2631   | 2016 | -0.18 | 0.01 | 1.265644 | 1.6018553 | 21.38504 | 0.129724 | 54.86 |
| 300390 | 2016 | -0.45 | 0.01 | 1.265644 | 1.6018553 | 20.73802 | 0.021637 | 34.75 |
| 300013 | 2016 | -0.62 | 0.01 | 1.265644 | 1.6018553 | 21.41402 | 0.044805 | 11.72 |
| 2309   | 2016 | -0.01 | 0.01 | 1.265644 | 1.6018553 | 23.93904 | 0.015717 | 41.76 |
| 2384   | 2016 | 0.206 | 0.01 | 1.265644 | 1.6018553 | 23.44053 | 0.054295 | 23.26 |
| 2463   | 2016 | 0.301 | 0.01 | 1.265644 | 1.6018553 | 22.39542 | 0.038783 | 20.19 |
| 2491   | 2016 | 0.351 | 0.01 | 1.265644 | 1.6018553 | 22.6314  | 0.187584 | 38.41 |
| 2564   | 2016 | 0.185 | 0.01 | 1.265644 | 1.6018553 | 23.55676 | -0.11001 | 29.73 |
| 2631   | 2016 | 0.006 | 0.01 | 1.265644 | 1.6018553 | 21.38504 | 0.129724 | 54.86 |
| 2091   | 2016 | -0.98 | 0.01 | 1.265644 | 1.6018553 | 23.3767  | 0.202881 | 30.02 |
| 300416 | 2016 | 0.137 | 0.01 | 1.265644 | 1.6018553 | 20.45554 | 0.115216 | 47.77 |
| 2531   | 2016 | -0.27 | 0.01 | 1.265644 | 1.6018553 | 22.79509 | 0.08835  | 29.81 |
| 300331 | 2016 | -0    | 0.01 | 1.265644 | 1.6018553 | 21.32385 | 0.020906 | 27.01 |
| 2384   | 2016 | -0.01 | 0.01 | 1.265644 | 1.6018553 | 23.44053 | 0.054295 | 23.26 |
| 300228 | 2016 | -0.49 | 0.01 | 1.265644 | 1.6018553 | 22.09125 | -0.16623 | 10.47 |
| 300393 | 2016 | 0.231 | 0.01 | 1.265644 | 1.6018553 | 21.96732 | 0.165492 | 31.6  |
| 2426   | 2016 | -0.06 | 0.01 | 1.265644 | 1.6018553 | 23.52926 | 0.054352 | 27.69 |
| 2631   | 2016 | -0.18 | 0.01 | 1.265644 | 1.6018553 | 21.38504 | 0.129724 | 54.86 |
| 2450   | 2016 | 0.627 | 0.01 | 1.265644 | 1.6018553 | 23.99758 | 0.125945 | 22.26 |
| 2091   | 2016 | -0.32 | 0.01 | 1.265644 | 1.6018553 | 23.3767  | 0.202881 | 30.02 |
| 603699 | 2016 | 0.289 | 0.01 | 1.265644 | 1.6018553 | 22.09309 | 0.083807 | 53.15 |
| 2384   | 2016 | -0.53 | 0.01 | 1.265644 | 1.6018553 | 23.44053 | 0.054295 | 23.26 |

|        |      |       |      |          |           |          |          |       |
|--------|------|-------|------|----------|-----------|----------|----------|-------|
| 2387   | 2016 | -0.74 | 0.01 | 1.265644 | 1.6018553 | 21.02837 | 0.034754 | 29.82 |
| 2387   | 2016 | -0.88 | 0.01 | 1.265644 | 1.6018553 | 21.02837 | 0.034754 | 29.82 |
| 2519   | 2016 | 0.331 | 0.01 | 1.265644 | 1.6018553 | 22.30865 | 0.084693 | 30.31 |
| 2631   | 2016 | -0.41 | 0.01 | 1.265644 | 1.6018553 | 21.38504 | 0.129724 | 54.86 |
| 603017 | 2016 | 0.131 | 0.01 | 1.265644 | 1.6018553 | 21.6605  | 0.080092 | 36.84 |
| 2079   | 2016 | -0.2  | 0.01 | 1.265644 | 1.6018553 | 21.28632 | 0.087356 | 34.28 |
| 300261 | 2016 | 1.173 | 0.01 | 1.265644 | 1.6018553 | 21.36271 | 0.018856 | 42.82 |
| 603800 | 2016 | -0.03 | 0.01 | 1.265644 | 1.6018553 | 20.93217 | -0.0689  | 39.15 |
| 600487 | 2016 | -0.29 | 0.01 | 1.265644 | 1.6018553 | 23.70563 | 0.224366 | 19.34 |
| 600105 | 2016 | -0.15 | 0.01 | 1.265644 | 1.6018553 | 22.14018 | 0.10373  | 37.19 |
| 2491   | 2016 | -0.07 | 0.01 | 1.265644 | 1.6018553 | 22.49126 | 0.187584 | 38.41 |
| 2564   | 2016 | -0.33 | 0.01 | 1.265644 | 1.6018553 | 23.55676 | -0.11001 | 29.73 |
| 2384   | 2016 | 0.206 | 0.01 | 1.265644 | 1.6018553 | 23.44053 | 0.054295 | 23.26 |
| 2426   | 2016 | -0.06 | 0.01 | 1.265644 | 1.6018553 | 23.14586 | 0.054352 | 27.69 |
| 600487 | 2016 | 0.007 | 0.01 | 1.265644 | 1.6018553 | 23.70563 | 0.224366 | 19.34 |
| 2499   | 2016 | -0.19 | 0.01 | 1.265644 | 1.6018553 | 20.77229 | 0.025435 | 19    |
| 600105 | 2016 | -0.12 | 0.01 | 1.265644 | 1.6018553 | 22.14018 | 0.10373  | 37.19 |
| 300165 | 2016 | 0.31  | 0.01 | 1.265644 | 1.6018553 | 21.40821 | 0.034526 | 37.34 |
| 300215 | 2016 | -0.05 | 0.01 | 1.265644 | 1.6018553 | 22.03018 | 0.037283 | 28.35 |
| 300346 | 2016 | 1.982 | 0.01 | 1.265644 | 1.6018553 | 20.97408 | 0.004321 | 15.15 |
| 2450   | 2016 | 0.907 | 0.01 | 1.265644 | 1.6018553 | 23.99758 | 0.125945 | 22.26 |
| 551    | 2016 | -0.73 | 0.01 | 1.265644 | 1.6018553 | 22.11234 | 0.052058 | 34.33 |
| 551    | 2016 | -0.23 | 0.01 | 1.265644 | 1.6018553 | 22.11234 | 0.052058 | 34.33 |
| 600487 | 2016 | -0.03 | 0.01 | 1.265644 | 1.6018553 | 23.70563 | 0.224366 | 19.34 |
| 2491   | 2016 | -0.27 | 0.01 | 1.265644 | 1.6018553 | 22.6314  | 0.187584 | 38.41 |
| 300292 | 2016 | -0.06 | 0.01 | 1.265644 | 1.6018553 | 21.79973 | 0.066002 | 23.55 |
| 600487 | 2016 | 0.121 | 0.01 | 1.265644 | 1.6018553 | 23.70563 | 0.224366 | 19.34 |
| 2309   | 2016 | -0.58 | 0.01 | 1.265644 | 1.6018553 | 23.93904 | 0.015717 | 41.76 |
| 600487 | 2016 | -0.1  | 0.01 | 1.265644 | 1.6018553 | 23.70563 | 0.224366 | 19.34 |
| 2309   | 2016 | -0.07 | 0.01 | 1.265644 | 1.6018553 | 23.93904 | 0.015717 | 41.76 |
| 2255   | 2016 | -0.26 | 0.01 | 1.265644 | 1.6018553 | 22.02898 | 0.033979 | 15.5  |
| 2547   | 2016 | -0.14 | 0.01 | 1.265644 | 1.6018553 | 22.41742 | 0.076619 | 42.96 |
| 600105 | 2016 | -0.05 | 0.01 | 1.265644 | 1.6018553 | 22.14018 | 0.10373  | 37.19 |
| 300261 | 2016 | 1.173 | 0.01 | 1.265644 | 1.6018553 | 21.36271 | 0.018856 | 42.82 |
| 300261 | 2016 | 1.173 | 0.01 | 1.265644 | 1.6018553 | 21.36271 | 0.018856 | 42.82 |
| 300128 | 2016 | 0.421 | 0.01 | 1.265644 | 1.6018553 | 21.5001  | 0.026014 | 20.35 |
| 600487 | 2016 | -0.41 | 0.01 | 1.265644 | 1.6018553 | 23.70563 | 0.224366 | 19.34 |
| 300292 | 2016 | 0.089 | 0.01 | 1.265644 | 1.6018553 | 21.93332 | 0.066002 | 23.55 |
| 2519   | 2016 | -0.05 | 0.01 | 1.265644 | 1.6018553 | 22.30865 | 0.084693 | 30.31 |
| 2091   | 2016 | -0.32 | 0.01 | 1.265644 | 1.6018553 | 23.3767  | 0.202881 | 30.02 |
| 2367   | 2016 | 0.009 | 0.01 | 1.265644 | 1.6018553 | 22.37362 | 0.121874 | 44.96 |
| 2075   | 2016 | -0.47 | 0.01 | 1.265644 | 1.6018553 | 22.78235 | 0.090036 | 20.34 |
| 2309   | 2016 | -0.32 | 0.01 | 1.265644 | 1.6018553 | 23.93904 | 0.015717 | 41.76 |
| 300393 | 2016 | -0.21 | 0.01 | 1.265644 | 1.6018553 | 21.96732 | 0.165492 | 31.6  |
| 603800 | 2016 | 0.096 | 0.01 | 1.265644 | 1.6018553 | 20.93217 | -0.0689  | 39.15 |
| 2367   | 2016 | -0.33 | 0.01 | 1.265644 | 1.6018553 | 22.37362 | 0.121874 | 44.96 |
| 2787   | 2016 | 0.025 | 0.01 | 1.265644 | 1.6018553 | 20.91213 | 0.113299 | 43.18 |
| 2463   | 2016 | -0.56 | 0.01 | 1.265644 | 1.6018553 | 22.39542 | 0.038783 | 20.19 |
| 2309   | 2016 | -0.11 | 0.01 | 1.265644 | 1.6018553 | 23.93904 | 0.015717 | 41.76 |
| 777    | 2016 | 0.186 | 0.01 | 1.265644 | 1.6018553 | 21.37778 | 0.079334 | 17.92 |
| 603828 | 2016 | 0.288 | 0.01 | 1.265644 | 1.6018553 | 21.79709 | 0.050633 | 37.4  |
| 2564   | 2016 | 0.015 | 0.01 | 1.265644 | 1.6018553 | 23.55676 | -0.11001 | 29.73 |
| 300211 | 2016 | 0.548 | 0.01 | 1.265644 | 1.6018553 | 20.18635 | 0.007589 | 48.4  |
| 2150   | 2016 | -0.81 | 0.01 | 1.265644 | 1.6018553 | 21.03941 | 0.099228 | 38.32 |



|        |      |       |      |          |           |          |          |       |
|--------|------|-------|------|----------|-----------|----------|----------|-------|
| 300416 | 2016 | 0.154 | 0.01 | 1.265644 | 1.6018553 | 20.45554 | 0.115216 | 47.77 |
| 300128 | 2016 | 0.421 | 0.01 | 1.265644 | 1.6018553 | 21.98054 | 0.026014 | 20.35 |
| 2245   | 2016 | -0    | 0.01 | 1.265644 | 1.6018553 | 22.33805 | 0.098688 | 32.59 |
| 2450   | 2016 | 0.296 | 0.01 | 1.265644 | 1.6018553 | 23.99758 | 0.125945 | 22.26 |
| 2564   | 2016 | -0.37 | 0.01 | 1.265644 | 1.6018553 | 22.96207 | -0.11001 | 29.73 |
| 300390 | 2016 | -0.39 | 0.01 | 1.265644 | 1.6018553 | 20.73802 | 0.021637 | 34.75 |
| 2333   | 2016 | -0.42 | 0.01 | 1.265644 | 1.6018553 | 21.28985 | 0.090247 | 65.46 |
| 2150   | 2016 | -0.81 | 0.01 | 1.265644 | 1.6018553 | 21.03941 | 0.099228 | 38.32 |
| 2491   | 2016 | 0.686 | 0.01 | 1.265644 | 1.6018553 | 22.6314  | 0.187584 | 38.41 |
| 2367   | 2016 | -0.14 | 0.01 | 1.265644 | 1.6018553 | 22.37362 | 0.121874 | 44.96 |
| 2514   | 2016 | -0.21 | 0.01 | 1.265644 | 1.6018553 | 20.82108 | -0.24088 | 26.07 |
| 300325 | 2016 | 1.046 | 0.01 | 1.265644 | 1.6018553 | 21.90444 | 0.051767 | 38.23 |
| 2450   | 2016 | 0.884 | 0.01 | 1.265644 | 1.6018553 | 23.99758 | 0.125945 | 22.26 |
| 2309   | 2016 | 0.006 | 0.01 | 1.265644 | 1.6018553 | 23.10667 | 0.015717 | 41.76 |
| 2160   | 2016 | -0.57 | 0.01 | 1.265644 | 1.6018553 | 22.29419 | 0.049007 | 25.42 |
| 2635   | 2016 | -0.19 | 0.01 | 1.265644 | 1.6018553 | 21.90379 | 0.147533 | 35.18 |
| 2787   | 2016 | -0.11 | 0.01 | 1.265644 | 1.6018553 | 20.67399 | 0.113299 | 43.18 |
| 2631   | 2016 | -0.03 | 0.01 | 1.265644 | 1.6018553 | 21.38504 | 0.129724 | 54.86 |
| 300416 | 2016 | 0.391 | 0.01 | 1.265644 | 1.6018553 | 20.23922 | 0.115216 | 47.77 |
| 2426   | 2016 | -0.5  | 0.01 | 1.265644 | 1.6018553 | 23.52926 | 0.054352 | 27.69 |
| 2426   | 2016 | 0.495 | 0.01 | 1.265644 | 1.6018553 | 23.52926 | 0.054352 | 27.69 |
| 300128 | 2016 | 0.421 | 0.01 | 1.265644 | 1.6018553 | 21.98054 | 0.026014 | 20.35 |
| 300165 | 2016 | 0.784 | 0.01 | 1.265644 | 1.6018553 | 21.46888 | 0.034526 | 37.34 |
| 777    | 2016 | 0.537 | 0.01 | 1.265644 | 1.6018553 | 21.37778 | 0.079334 | 17.92 |
| 2631   | 2016 | -0.67 | 0.01 | 1.265644 | 1.6018553 | 21.38504 | 0.129724 | 54.86 |
| 2075   | 2016 | -0.47 | 0.01 | 1.265644 | 1.6018553 | 21.67816 | 0.090036 | 20.34 |
| 2150   | 2016 | -0.81 | 0.01 | 1.265644 | 1.6018553 | 21.03941 | 0.099228 | 38.32 |
| 2547   | 2016 | -0.49 | 0.01 | 1.265644 | 1.6018553 | 22.41742 | 0.076619 | 42.96 |
| 2547   | 2016 | -0.63 | 0.01 | 1.265644 | 1.6018553 | 22.41742 | 0.076619 | 42.96 |
| 2519   | 2016 | 0.032 | 0.01 | 1.265644 | 1.6018553 | 22.30865 | 0.084693 | 30.31 |
| 300128 | 2016 | 0.013 | 0.01 | 1.265644 | 1.6018553 | 21.98054 | 0.026014 | 20.35 |
| 2079   | 2016 | -0.2  | 0.01 | 1.265644 | 1.6018553 | 21.28632 | 0.087356 | 34.28 |
| 2309   | 2016 | -0.2  | 0.01 | 1.265644 | 1.6018553 | 23.93904 | 0.015717 | 41.76 |
| 2547   | 2016 | -0.63 | 0.01 | 1.265644 | 1.6018553 | 22.41742 | 0.076619 | 42.96 |
| 600487 | 2016 | -0.04 | 0.01 | 1.265644 | 1.6018553 | 23.70563 | 0.224366 | 19.34 |
| 2091   | 2016 | 0.205 | 0.01 | 1.265644 | 1.6018553 | 23.3767  | 0.202881 | 30.02 |
| 2453   | 2016 | -0.76 | 0.01 | 1.265644 | 1.6018553 | 21.13373 | -0.26182 | 21.68 |
| 600487 | 2016 | -0.54 | 0.01 | 1.265644 | 1.6018553 | 23.70563 | 0.224366 | 19.34 |
| 300325 | 2016 | 0.771 | 0.01 | 1.265644 | 1.6018553 | 21.90444 | 0.051767 | 38.23 |
| 2075   | 2016 | -0.47 | 0.01 | 1.265644 | 1.6018553 | 22.78235 | 0.090036 | 20.34 |
| 300165 | 2016 | 0.31  | 0.01 | 1.265644 | 1.6018553 | 21.46888 | 0.034526 | 37.34 |
| 300393 | 2016 | -0.07 | 0.01 | 1.265644 | 1.6018553 | 21.96732 | 0.165492 | 31.6  |
| 2081   | 2016 | 0.094 | 0.01 | 1.265644 | 1.6018553 | 24.01251 | 0.167188 | 24.7  |
| 603005 | 2016 | 1.157 | 0.01 | 1.265644 | 1.6018553 | 21.39704 | 0.031508 | 25.21 |
| 2079   | 2016 | 0.036 | 0.01 | 1.265644 | 1.6018553 | 21.24186 | 0.087356 | 34.28 |
| 2089   | 2016 | 0.412 | 0.01 | 1.265644 | 1.6018553 | 22.40511 | 0.028052 | 18.05 |
| 2426   | 2016 | -0.06 | 0.01 | 1.265644 | 1.6018553 | 23.52926 | 0.054352 | 27.69 |
| 2547   | 2016 | -0.06 | 0.01 | 1.265644 | 1.6018553 | 22.41742 | 0.076619 | 42.96 |
| 603017 | 2016 | 0.733 | 0.01 | 1.265644 | 1.6018553 | 21.4905  | 0.080092 | 36.84 |
| 300228 | 2016 | -0.14 | 0.01 | 1.265644 | 1.6018553 | 22.09125 | -0.16623 | 10.47 |
| 300165 | 2016 | 0.784 | 0.01 | 1.265644 | 1.6018553 | 21.46888 | 0.034526 | 37.34 |
| 2172   | 2016 | 0.183 | 0.01 | 1.265644 | 1.6018553 | 21.44485 | 0.20452  | 49.1  |
| 2150   | 2016 | -0.81 | 0.01 | 1.265644 | 1.6018553 | 21.03941 | 0.099228 | 38.32 |
| 2450   | 2016 | 0.884 | 0.01 | 1.265644 | 1.6018553 | 23.99758 | 0.125945 | 22.26 |

|        |      |       |      |          |           |          |          |       |
|--------|------|-------|------|----------|-----------|----------|----------|-------|
| 2075   | 2016 | -0.47 | 0.01 | 1.265644 | 1.6018553 | 22.78235 | 0.090036 | 20.34 |
| 2367   | 2016 | 0.243 | 0.01 | 1.265644 | 1.6018553 | 22.37362 | 0.121874 | 44.96 |
| 300141 | 2016 | -0.37 | 0.01 | 1.265644 | 1.6018553 | 20.68458 | 0.045781 | 45.41 |
| 2453   | 2016 | 0.405 | 0.01 | 1.265644 | 1.6018553 | 21.52    | -0.26182 | 21.68 |
| 300228 | 2016 | 0.394 | 0.01 | 1.265644 | 1.6018553 | 22.09125 | -0.16623 | 10.47 |
| 2075   | 2016 | -0.47 | 0.01 | 1.265644 | 1.6018553 | 22.78235 | 0.090036 | 20.34 |
| 2309   | 2016 | -0.4  | 0.01 | 1.265644 | 1.6018553 | 23.93904 | 0.015717 | 41.76 |
| 600200 | 2016 | 0.5   | 0.01 | 1.265644 | 1.6018553 | 21.92971 | 0.026293 | 17.01 |
| 603355 | 2016 | -0.47 | 0.01 | 1.265644 | 1.6018553 | 22.35157 | 0.168229 | 45.79 |
| 2367   | 2016 | 0.028 | 0.01 | 1.265644 | 1.6018553 | 22.37362 | 0.121874 | 44.96 |
| 600487 | 2016 | -0.34 | 0.01 | 1.265644 | 1.6018553 | 23.70563 | 0.224366 | 19.34 |
| 300260 | 2016 | -0.38 | 0.01 | 1.265644 | 1.6018553 | 20.73207 | 0.014517 | 28.38 |
| 300228 | 2016 | 0.173 | 0.01 | 1.265644 | 1.6018553 | 21.97398 | -0.16623 | 10.47 |
| 2453   | 2016 | 0.563 | 0.01 | 1.265644 | 1.6018553 | 21.52    | -0.26182 | 21.68 |
| 603355 | 2016 | -0.32 | 0.01 | 1.265644 | 1.6018553 | 22.35157 | 0.168229 | 45.79 |
| 2499   | 2016 | -0.19 | 0.01 | 1.265644 | 1.6018553 | 20.49718 | 0.025435 | 19    |
| 300390 | 2016 | -0.5  | 0.01 | 1.265644 | 1.6018553 | 20.73802 | 0.021637 | 34.75 |
| 2450   | 2016 | 1.131 | 0.01 | 1.265644 | 1.6018553 | 23.99758 | 0.125945 | 22.26 |
| 300228 | 2016 | -0.13 | 0.01 | 1.265644 | 1.6018553 | 22.09125 | -0.16623 | 10.47 |
| 551    | 2016 | -0.23 | 0.01 | 1.265644 | 1.6018553 | 22.11234 | 0.052058 | 34.33 |
| 2631   | 2016 | -0.14 | 0.01 | 1.265644 | 1.6018553 | 21.38504 | 0.129724 | 54.86 |
| 300128 | 2016 | 0.715 | 0.01 | 1.265644 | 1.6018553 | 21.98054 | 0.026014 | 20.35 |
| 300331 | 2016 | 0.439 | 0.01 | 1.265644 | 1.6018553 | 21.32385 | 0.020906 | 27.01 |
| 2631   | 2016 | -0.18 | 0.01 | 1.265644 | 1.6018553 | 21.38504 | 0.129724 | 54.86 |
| 2514   | 2016 | -0.21 | 0.01 | 1.265644 | 1.6018553 | 21.02631 | -0.24088 | 26.07 |
| 300128 | 2016 | -0.61 | 0.01 | 1.265644 | 1.6018553 | 21.98054 | 0.026014 | 20.35 |
| 2463   | 2016 | -0.62 | 0.01 | 1.265644 | 1.6018553 | 22.39542 | 0.038783 | 20.19 |
| 300394 | 2016 | 0.432 | 0.01 | 1.265644 | 1.6018553 | 20.51992 | 0.160586 | 46.95 |
| 603005 | 2016 | 1.157 | 0.01 | 1.265644 | 1.6018553 | 21.3833  | 0.031508 | 25.21 |
| 2333   | 2016 | -0.42 | 0.01 | 1.265644 | 1.6018553 | 21.28985 | 0.090247 | 65.46 |
| 2309   | 2016 | -0.26 | 0.01 | 1.265644 | 1.6018553 | 23.93904 | 0.015717 | 41.76 |
| 300128 | 2016 | 0.062 | 0.01 | 1.265644 | 1.6018553 | 21.98054 | 0.026014 | 20.35 |
| 2245   | 2016 | -0    | 0.01 | 1.265644 | 1.6018553 | 22.33805 | 0.098688 | 32.59 |
| 300128 | 2016 | 0.421 | 0.01 | 1.265644 | 1.6018553 | 21.98054 | 0.026014 | 20.35 |
| 300390 | 2016 | -0.45 | 0.01 | 1.265644 | 1.6018553 | 20.73802 | 0.021637 | 34.75 |
| 2081   | 2016 | -0.03 | 0.01 | 1.265644 | 1.6018553 | 24.01251 | 0.167188 | 24.7  |
| 603800 | 2016 | 0.096 | 0.01 | 1.265644 | 1.6018553 | 20.93217 | -0.0689  | 39.15 |
| 603828 | 2016 | -0.15 | 0.01 | 1.265644 | 1.6018553 | 21.79709 | 0.050633 | 37.4  |
| 2450   | 2016 | 0.884 | 0.01 | 1.265644 | 1.6018553 | 23.99758 | 0.125945 | 22.26 |
| 300128 | 2016 | 0.421 | 0.01 | 1.265644 | 1.60E+00  | 21.98054 | 0.026014 | 20.35 |
| 300331 | 2016 | 0.733 | 0.01 | 1.265644 | 1.60E+00  | 21.13536 | 0.020906 | 27.01 |
| 2255   | 2016 | 0.033 | 0.01 | 1.265644 | 1.60E+00  | 22.02898 | 0.033979 | 15.5  |
| 300128 | 2016 | 0.02  | 0.01 | 1.265644 | 1.60E+00  | 21.98054 | 0.026014 | 20.35 |
| 2787   | 2016 | -0.47 | 0.01 | 1.265644 | 1.60E+00  | 20.91213 | 0.113299 | 43.18 |
| 300342 | 2016 | -0.51 | 0.01 | 1.265644 | 1.60E+00  | 21.11062 | 0.133981 | 46.04 |
| 2635   | 2016 | 0.082 | 0.01 | 1.265644 | 1.60E+00  | 21.90379 | 0.147533 | 35.18 |
| 2081   | 2016 | -0.07 | 0.01 | 1.265644 | 1.60E+00  | 23.70444 | 0.167188 | 24.7  |
| 300331 | 2016 | 0.758 | 0.01 | 1.265644 | 1.60E+00  | 21.32385 | 0.020906 | 27.01 |
| 600487 | 2016 | 0.098 | 0.01 | 1.265644 | 1.60E+00  | 23.70563 | 0.224366 | 19.34 |
| 300261 | 2016 | 1.173 | 0.01 | 1.265644 | 1.60E+00  | 21.36271 | 0.018856 | 42.82 |
| 300228 | 2016 | -0.21 | 0.01 | 1.265644 | 1.60E+00  | 22.09125 | -0.16623 | 10.47 |
| 2652   | 2016 | 0.015 | 0.01 | 1.265644 | 1.60E+00  | 21.55851 | 0.16866  | 37.5  |
| 300260 | 2016 | -0.29 | 0.01 | 1.265644 | 1.6018553 | 20.73207 | 0.014517 | 28.38 |
| 300261 | 2016 | 1.173 | 0.01 | 1.265644 | 1.6018553 | 21.36271 | 0.018856 | 42.82 |

|        |      |       |      |          |           |          |          |       |
|--------|------|-------|------|----------|-----------|----------|----------|-------|
| 2255   | 2016 | -0.26 | 0.01 | 1.265644 | 1.6018553 | 22.02898 | 0.033979 | 15.5  |
| 2514   | 2016 | -0.02 | 0.01 | 1.265644 | 1.6018553 | 21.02631 | -0.24088 | 26.07 |
| 2453   | 2016 | -0.57 | 0.01 | 1.265644 | 1.6018553 | 21.52    | -0.26182 | 21.68 |
| 2531   | 2016 | -0.27 | 0.01 | 1.265644 | 1.6018553 | 22.79509 | 0.08835  | 29.81 |
| 777    | 2016 | 0.726 | 0.01 | 1.265644 | 1.6018553 | 21.37778 | 0.079334 | 17.92 |
| 2531   | 2016 | -0.47 | 0.01 | 1.265644 | 1.6018553 | 22.79509 | 0.08835  | 29.81 |
| 777    | 2016 | 0.064 | 0.01 | 1.265644 | 1.6018553 | 21.35095 | 0.079334 | 17.92 |
| 2499   | 2016 | -0.18 | 0.01 | 1.265644 | 1.6018553 | 20.77229 | 0.025435 | 19    |
| 2531   | 2016 | -0.47 | 0.01 | 1.265644 | 1.6018553 | 22.42908 | 0.08835  | 29.81 |
| 2635   | 2016 | -0.22 | 0.01 | 1.265644 | 1.6018553 | 21.90379 | 0.147533 | 35.18 |
| 2491   | 2016 | -0.57 | 0.01 | 1.265644 | 1.6018553 | 22.6314  | 0.187584 | 38.41 |
| 300013 | 2016 | -0.14 | 0.01 | 1.265644 | 1.6018553 | 21.41402 | 0.044805 | 11.72 |
| 300013 | 2016 | -0.62 | 0.01 | 1.265644 | 1.6018553 | 21.33784 | 0.044805 | 11.72 |
| 2564   | 2016 | -0.17 | 0.01 | 1.265644 | 1.6018553 | 23.55676 | -0.11001 | 29.73 |
| 2514   | 2016 | -0.39 | 0.01 | 1.265644 | 1.6018553 | 21.02631 | -0.24088 | 26.07 |
| 2435   | 2016 | -0.19 | 0.01 | 1.265644 | 1.6018553 | 22.49594 | 0.059093 | 36.81 |
| 2652   | 2016 | -0.43 | 0.01 | 1.265644 | 1.6018553 | 21.55851 | 0.16866  | 37.5  |
| 2089   | 2016 | 0.951 | 0.01 | 1.265644 | 1.6018553 | 22.40511 | 0.028052 | 18.05 |
| 2426   | 2016 | -0.06 | 0.01 | 1.265644 | 1.6018553 | 23.52926 | 0.054352 | 27.69 |
| 2652   | 2016 | 0.015 | 0.01 | 1.265644 | 1.6018553 | 20.90935 | 0.16866  | 37.5  |
| 600487 | 2016 | 0.118 | 0.01 | 1.265644 | 1.6018553 | 23.70563 | 0.224366 | 19.34 |
| 300416 | 2016 | 0.391 | 0.01 | 1.265644 | 1.6018553 | 20.45554 | 0.115216 | 47.77 |
| 603699 | 2016 | -0.71 | 0.01 | 1.265644 | 1.6018553 | 22.12005 | 0.083807 | 53.15 |
| 2245   | 2016 | 0.091 | 0.01 | 1.265644 | 1.6018553 | 22.33805 | 0.098688 | 32.59 |
| 2519   | 2016 | 0.036 | 0.01 | 1.265644 | 1.6018553 | 22.25085 | 0.084693 | 30.31 |
| 2491   | 2016 | -0.07 | 0.01 | 1.265644 | 1.6018553 | 22.6314  | 0.187584 | 38.41 |
| 2255   | 2016 | -0.26 | 0.01 | 1.265644 | 1.6018553 | 22.02898 | 0.033979 | 15.5  |
| 2547   | 2016 | -0.63 | 0.01 | 1.265644 | 1.6018553 | 22.41742 | 0.076619 | 42.96 |
| 551    | 2016 | -0.73 | 0.01 | 1.265644 | 1.6018553 | 22.11234 | 0.052058 | 34.33 |
| 2547   | 2016 | 0.031 | 0.01 | 1.265644 | 1.6018553 | 22.41742 | 0.076619 | 42.96 |
| 2309   | 2016 | 0.168 | 0.01 | 1.265644 | 1.6018553 | 23.93904 | 0.015717 | 41.76 |
| 2514   | 2016 | 0.15  | 0.01 | 1.265644 | 1.6018553 | 21.02631 | -0.24088 | 26.07 |
| 600105 | 2016 | -0.4  | 0.01 | 1.265644 | 1.6018553 | 22.14018 | 0.10373  | 37.19 |
| 551    | 2016 | -0.15 | 0.01 | 1.265644 | 1.6018553 | 22.11234 | 0.052058 | 34.33 |
| 2309   | 2016 | -0.32 | 0.01 | 1.265644 | 1.6018553 | 23.93904 | 0.015717 | 41.76 |
| 551    | 2016 | -0.23 | 0.01 | 1.265644 | 1.6018553 | 22.11234 | 0.052058 | 34.33 |
| 2514   | 2016 | 0.15  | 0.01 | 1.265644 | 1.6018553 | 21.02631 | -0.24088 | 26.07 |
| 2150   | 2016 | -0.81 | 0.01 | 1.265644 | 1.6018553 | 20.79953 | 0.099228 | 38.32 |
| 2079   | 2016 | -0.2  | 0.01 | 1.265644 | 1.6018553 | 21.28632 | 0.087356 | 34.28 |
| 2491   | 2016 | -0.12 | 0.01 | 1.265644 | 1.6018553 | 22.6314  | 0.187584 | 38.41 |
| 300382 | 2016 | 0.284 | 0.01 | 1.265644 | 1.6018553 | 20.92486 | 0.098661 | 64.91 |
| 300013 | 2016 | -0.25 | 0.01 | 1.265644 | 1.6018553 | 21.41402 | 0.044805 | 11.72 |
| 300331 | 2016 | 0.114 | 0.01 | 1.265644 | 1.6018553 | 21.32385 | 0.020906 | 27.01 |
| 2450   | 2016 | 0.884 | 0.01 | 1.265644 | 1.6018553 | 23.99758 | 0.125945 | 22.26 |
| 601700 | 2016 | -0.13 | 0.01 | 1.265644 | 1.6018553 | 22.2796  | 0.068443 | 29.24 |
| 2309   | 2016 | -0.11 | 0.01 | 1.265644 | 1.6018553 | 23.93904 | 0.015717 | 41.76 |
| 300261 | 2016 | 1.173 | 0.01 | 1.265644 | 1.6018553 | 21.03347 | 0.018856 | 42.82 |
| 300260 | 2016 | -0.38 | 0.01 | 1.265644 | 1.6018553 | 20.73207 | 0.014517 | 28.38 |
| 601700 | 2016 | -0.13 | 0.01 | 1.265644 | 1.6018553 | 22.32014 | 0.068443 | 29.24 |
| 600487 | 2016 | -0.48 | 0.01 | 1.265644 | 1.6018553 | 23.70563 | 0.224366 | 19.34 |
| 600200 | 2016 | 0.5   | 0.01 | 1.265644 | 1.6018553 | 22.3795  | 0.026293 | 17.01 |
| 2089   | 2016 | 0.388 | 0.01 | 1.265644 | 1.6018553 | 22.40511 | 0.028052 | 18.05 |
| 300325 | 2016 | 0.654 | 0.01 | 1.265644 | 1.6018553 | 21.90444 | 0.051767 | 38.23 |
| 2089   | 2016 | 0.951 | 0.01 | 1.265644 | 1.6018553 | 22.40511 | 0.028052 | 18.05 |

|        |      |       |      |          |           |          |          |       |
|--------|------|-------|------|----------|-----------|----------|----------|-------|
| 600487 | 2016 | 0.007 | 0.01 | 1.265644 | 1.6018553 | 23.70563 | 0.224366 | 19.34 |
| 300382 | 2016 | 0.105 | 0.01 | 1.265644 | 1.6018553 | 20.92486 | 0.098661 | 64.91 |
| 2333   | 2016 | -0.42 | 0.01 | 1.265644 | 1.6018553 | 21.28985 | 0.090247 | 65.46 |
| 300013 | 2016 | -0.62 | 0.01 | 1.265644 | 1.6018553 | 21.41402 | 0.044805 | 11.72 |
| 300390 | 2016 | -0.45 | 0.01 | 1.265644 | 1.6018553 | 20.73802 | 0.021637 | 34.75 |
| 603828 | 2016 | 0.141 | 0.01 | 1.265644 | 1.6018553 | 21.63596 | 0.050633 | 37.4  |
| 551    | 2016 | -0.73 | 0.01 | 1.265644 | 1.6018553 | 22.11234 | 0.052058 | 34.33 |
| 600487 | 2016 | 0.48  | 0.01 | 1.265644 | 1.6018553 | 23.70563 | 0.224366 | 19.34 |
| 300215 | 2016 | -0.05 | 0.01 | 1.265644 | 1.6018553 | 22.04231 | 0.037283 | 28.35 |
| 2081   | 2016 | -0.02 | 0.01 | 1.265644 | 1.6018553 | 24.01251 | 0.167188 | 24.7  |
| 2081   | 2016 | -0.19 | 0.01 | 1.265644 | 1.6018553 | 24.01251 | 0.167188 | 24.7  |
| 300165 | 2016 | 0.31  | 0.01 | 1.265644 | 1.6018553 | 21.46888 | 0.034526 | 37.34 |
| 2079   | 2016 | -0.03 | 0.01 | 1.265644 | 1.6018553 | 21.28632 | 0.087356 | 34.28 |
| 2245   | 2016 | 0.311 | 0.01 | 1.265644 | 1.60E+00  | 22.33805 | 0.098688 | 32.59 |
| 2631   | 2016 | -0.18 | 0.01 | 1.265644 | 1.60E+00  | 21.45905 | 0.129724 | 54.86 |
| 300393 | 2016 | -0.08 | 0.01 | 1.265644 | 1.60E+00  | 21.49095 | 0.165492 | 31.6  |
| 600487 | 2016 | 0.007 | 0.01 | 1.265644 | 1.60E+00  | 23.70563 | 0.224366 | 19.34 |
| 300260 | 2016 | 0.029 | 0.01 | 1.265644 | 1.60E+00  | 20.73207 | 0.014517 | 28.38 |
| 300013 | 2016 | -0.62 | 0.01 | 1.265644 | 1.60E+00  | 21.41402 | 0.044805 | 11.72 |
| 300346 | 2016 | 1.982 | 0.01 | 1.265644 | 1.60E+00  | 20.97408 | 0.004321 | 15.15 |
| 2309   | 2016 | 0.168 | 0.01 | 1.265644 | 1.60E+00  | 23.93904 | 0.015717 | 41.76 |
| 551    | 2016 | -0.37 | 0.01 | 1.265644 | 1.60E+00  | 22.11234 | 0.052058 | 34.33 |
| 2514   | 2016 | -0.11 | 0.01 | 1.265644 | 1.60E+00  | 21.02631 | -0.24088 | 26.07 |
| 2450   | 2016 | 0.946 | 0.01 | 1.265644 | 1.6018553 | 23.99758 | 0.125945 | 22.26 |
| 300346 | 2016 | 1.982 | 0.01 | 1.265644 | 1.6018553 | 20.97408 | 0.004321 | 15.15 |
| 300128 | 2016 | 0.053 | 0.01 | 1.265644 | 1.6018553 | 21.98054 | 0.026014 | 20.35 |
| 2290   | 2016 | 0.251 | 0.01 | 1.265644 | 1.6018553 | 21.39331 | 0.023201 | 27.49 |
| 300342 | 2016 | 0.149 | 0.01 | 1.265644 | 1.6018553 | 21.11062 | 0.133981 | 46.04 |
| 300013 | 2016 | -0.62 | 0.01 | 1.265644 | 1.6018553 | 21.41402 | 0.044805 | 11.72 |
| 300228 | 2016 | -0.16 | 0.01 | 1.265644 | 1.6018553 | 22.09125 | -0.16623 | 10.47 |
| 2491   | 2016 | 0.756 | 0.01 | 1.265644 | 1.6018553 | 22.6314  | 0.187584 | 38.41 |
| 300228 | 2016 | 0.149 | 0.01 | 1.265644 | 1.6018553 | 21.97398 | -0.16623 | 10.47 |
| 2519   | 2016 | -0.29 | 0.01 | 1.265644 | 1.6018553 | 22.30865 | 0.084693 | 30.31 |
| 2531   | 2016 | -0.27 | 0.01 | 1.265644 | 1.6018553 | 22.79509 | 0.08835  | 29.81 |
| 2245   | 2016 | -0    | 0.01 | 1.265644 | 1.6018553 | 22.33805 | 0.098688 | 32.59 |
| 2519   | 2016 | -0.12 | 0.01 | 1.265644 | 1.6018553 | 22.30865 | 0.084693 | 30.31 |
| 2290   | 2016 | 0.212 | 0.01 | 1.265644 | 1.6018553 | 21.39331 | 0.023201 | 27.49 |
| 600487 | 2016 | -0.49 | 0.01 | 1.265644 | 1.6018553 | 23.70563 | 0.224366 | 19.34 |
| 2091   | 2016 | -0.98 | 0.01 | 1.265644 | 1.6018553 | 23.3767  | 0.202881 | 30.02 |
| 2499   | 2016 | -0.19 | 0.01 | 1.265644 | 1.6018553 | 20.77229 | 0.025435 | 19    |
| 2499   | 2016 | -0.19 | 0.01 | 1.265644 | 1.6018553 | 20.77229 | 0.025435 | 19    |
| 2079   | 2016 | 0.723 | 0.01 | 1.265644 | 1.6018553 | 21.28632 | 0.087356 | 34.28 |
| 600487 | 2016 | -0.27 | 0.01 | 1.265644 | 1.6018553 | 23.14875 | 0.224366 | 19.34 |
| 2453   | 2016 | 0.11  | 0.01 | 1.265644 | 1.6018553 | 21.52    | -0.26182 | 21.68 |
| 2127   | 2016 | 0.098 | 0.01 | 1.265644 | 1.6018553 | 21.43954 | 0.19374  | 26.78 |
| 2531   | 2016 | -0.27 | 0.01 | 1.265644 | 1.6018553 | 22.79509 | 0.08835  | 29.81 |
| 600487 | 2016 | -0.2  | 0.01 | 1.265644 | 1.6018553 | 23.70563 | 0.224366 | 19.34 |
| 2463   | 2016 | -0.4  | 0.01 | 1.265644 | 1.6018553 | 22.39542 | 0.038783 | 20.19 |
| 300382 | 2016 | 0.563 | 0.01 | 1.265644 | 1.6018553 | 20.92486 | 0.098661 | 64.91 |
| 300228 | 2016 | -0.12 | 0.01 | 1.265644 | 1.6018553 | 22.09125 | -0.16623 | 10.47 |
| 300416 | 2016 | 0.25  | 0.01 | 1.265644 | 1.6018553 | 20.45554 | 0.115216 | 47.77 |
| 2519   | 2016 | 0.07  | 0.01 | 1.265644 | 1.6018553 | 22.30865 | 0.084693 | 30.31 |
| 2635   | 2016 | 0.143 | 0.01 | 1.265644 | 1.6018553 | 21.90379 | 0.147533 | 35.18 |
| 300416 | 2016 | 0.103 | 0.01 | 1.265644 | 1.6018553 | 20.45554 | 0.115216 | 47.77 |

|        |      |       |      |          |           |          |          |       |
|--------|------|-------|------|----------|-----------|----------|----------|-------|
| 603699 | 2016 | -0.03 | 0.01 | 1.265644 | 1.6018553 | 22.12005 | 0.083807 | 53.15 |
| 300346 | 2016 | 1.982 | 0.01 | 1.265644 | 1.6018553 | 20.97408 | 0.004321 | 15.15 |
| 600487 | 2016 | -0.12 | 0.01 | 1.265644 | 1.6018553 | 23.70563 | 0.224366 | 19.34 |
| 300382 | 2016 | 0.336 | 0.01 | 1.265644 | 1.6018553 | 20.88001 | 0.098661 | 64.91 |
| 2245   | 2016 | 0.087 | 0.01 | 1.265644 | 1.6018553 | 22.33805 | 0.098688 | 32.59 |
| 2787   | 2016 | -0.1  | 0.01 | 1.265644 | 1.6018553 | 20.91213 | 0.113299 | 43.18 |
| 600105 | 2016 | -0.21 | 0.01 | 1.265644 | 1.6018553 | 21.89096 | 0.10373  | 37.19 |
| 300260 | 2016 | -0.29 | 0.01 | 1.265644 | 1.6018553 | 20.73207 | 0.014517 | 28.38 |
| 300215 | 2016 | -0.05 | 0.01 | 1.265644 | 1.6018553 | 22.04231 | 0.037283 | 28.35 |
| 300141 | 2016 | -0.37 | 0.01 | 1.265644 | 1.6018553 | 20.68458 | 0.045781 | 45.41 |
| 601700 | 2016 | -0.08 | 0.01 | 1.265644 | 1.6018553 | 22.32014 | 0.068443 | 29.24 |
| 2245   | 2016 | -0.57 | 0.01 | 1.265644 | 1.6018553 | 22.33805 | 0.098688 | 32.59 |
| 2453   | 2016 | 0.298 | 0.01 | 1.265644 | 1.6018553 | 21.52    | -0.26182 | 21.68 |
| 300346 | 2016 | 1.982 | 0.01 | 1.265644 | 1.6018553 | 20.97408 | 0.004321 | 15.15 |
| 2787   | 2016 | -0.1  | 0.01 | 1.265644 | 1.6018553 | 20.91213 | 0.113299 | 43.18 |
| 2652   | 2016 | -0.21 | 0.01 | 1.265644 | 1.6018553 | 21.55851 | 0.16866  | 37.5  |
| 2081   | 2016 | -0.19 | 0.01 | 1.265644 | 1.6018553 | 24.01251 | 0.167188 | 24.7  |
| 2384   | 2016 | -0.01 | 0.01 | 1.265644 | 1.6018553 | 23.44053 | 0.054295 | 23.26 |
| 2160   | 2016 | -0.19 | 0.01 | 1.265644 | 1.6018553 | 22.29419 | 0.049007 | 25.42 |
| 600487 | 2016 | -0.23 | 0.01 | 1.265644 | 1.6018553 | 23.70563 | 0.224366 | 19.34 |
| 300141 | 2016 | -0.37 | 0.01 | 1.265644 | 1.6018553 | 20.68458 | 0.045781 | 45.41 |
| 2450   | 2016 | 0.494 | 0.01 | 1.265644 | 1.6018553 | 23.59908 | 0.125945 | 22.26 |
| 300013 | 2016 | -0.62 | 0.01 | 1.265644 | 1.6018553 | 21.41402 | 0.044805 | 11.72 |
| 551    | 2016 | -0.32 | 0.01 | 1.265644 | 1.6018553 | 22.11234 | 0.052058 | 34.33 |
| 2547   | 2016 | -0.49 | 0.01 | 1.265644 | 1.6018553 | 22.41742 | 0.076619 | 42.96 |
| 2091   | 2016 | -0.98 | 0.01 | 1.265644 | 1.6018553 | 23.3767  | 0.202881 | 30.02 |
| 2547   | 2016 | -0.63 | 0.01 | 1.265644 | 1.6018553 | 22.41742 | 0.076619 | 42.96 |
| 300228 | 2016 | 0.394 | 0.01 | 1.265644 | 1.6018553 | 22.09125 | -0.16623 | 10.47 |
| 2255   | 2016 | -0.52 | 0.01 | 1.265644 | 1.6018553 | 22.02898 | 0.033979 | 15.5  |
| 2089   | 2016 | 0.478 | 0.01 | 1.265644 | 1.6018553 | 22.40511 | 0.028052 | 18.05 |
| 2160   | 2016 | -0.35 | 0.01 | 1.265644 | 1.6018553 | 22.29419 | 0.049007 | 25.42 |
| 300346 | 2016 | 1.982 | 0.01 | 1.265644 | 1.6018553 | 20.95775 | 0.004321 | 15.15 |
| 603800 | 2016 | -0.35 | 0.01 | 1.265644 | 1.6018553 | 20.93217 | -0.0689  | 39.15 |
| 603355 | 2016 | -0.34 | 0.01 | 1.265644 | 1.6018553 | 22.35157 | 0.168229 | 45.79 |
| 2453   | 2016 | 0.298 | 0.01 | 1.265644 | 1.6018553 | 21.52    | -0.26182 | 21.68 |
| 300013 | 2016 | -0.09 | 0.01 | 1.265644 | 1.6018553 | 21.41402 | 0.044805 | 11.72 |
| 300382 | 2016 | 0.105 | 0.01 | 1.265644 | 1.6018553 | 20.92486 | 0.098661 | 64.91 |
| 2290   | 2016 | 0.23  | 0.01 | 1.265644 | 1.6018553 | 21.39331 | 0.023201 | 27.49 |
| 300325 | 2016 | 0.654 | 0.01 | 1.265644 | 1.6018553 | 21.90444 | 0.051767 | 38.23 |
| 300260 | 2016 | -0.63 | 0.01 | 1.265644 | 1.6018553 | 20.66665 | 0.014517 | 28.38 |
| 2491   | 2016 | 0.004 | 0.01 | 1.265644 | 1.6018553 | 22.6314  | 0.187584 | 38.41 |
| 2491   | 2016 | -0.16 | 0.01 | 1.265644 | 1.6018553 | 22.6314  | 0.187584 | 38.41 |
| 2547   | 2016 | -0.63 | 0.01 | 1.265644 | 1.6018553 | 22.41742 | 0.076619 | 42.96 |
| 2491   | 2016 | -0.18 | 0.01 | 1.265644 | 1.6018553 | 22.6314  | 0.187584 | 38.41 |
| 551    | 2016 | -0.39 | 0.01 | 1.265644 | 1.6018553 | 22.11234 | 0.052058 | 34.33 |
| 300292 | 2016 | 0.98  | 0.01 | 1.265644 | 1.6018553 | 21.93332 | 0.066002 | 23.55 |
| 603828 | 2016 | -0.03 | 0.01 | 1.265644 | 1.6018553 | 21.79709 | 0.050633 | 37.4  |
| 777    | 2016 | 0.064 | 0.01 | 1.265644 | 1.6018553 | 21.37778 | 0.079334 | 17.92 |
| 2463   | 2016 | 0.301 | 0.01 | 1.265644 | 1.6018553 | 22.32274 | 0.038783 | 20.19 |
| 2255   | 2016 | -0.26 | 0.01 | 1.265644 | 1.6018553 | 22.02898 | 0.033979 | 15.5  |
| 300292 | 2016 | 0.017 | 0.01 | 1.265644 | 1.6018553 | 21.93332 | 0.066002 | 23.55 |
| 600105 | 2016 | -0.12 | 0.01 | 1.265644 | 1.6018553 | 22.14018 | 0.10373  | 37.19 |
| 600200 | 2016 | 0.5   | 0.01 | 1.265644 | 1.6018553 | 22.3795  | 0.026293 | 17.01 |
| 2387   | 2016 | -0.81 | 0.01 | 1.265644 | 1.6018553 | 21.02837 | 0.034754 | 29.82 |

|        |      |       |      |          |           |          |          |       |
|--------|------|-------|------|----------|-----------|----------|----------|-------|
| 300141 | 2016 | -0.37 | 0.01 | 1.265644 | 1.6018553 | 20.68458 | 0.045781 | 45.41 |
| 603699 | 2016 | -0.35 | 0.01 | 1.265644 | 1.6018553 | 22.12005 | 0.083807 | 53.15 |
| 2079   | 2016 | 0.134 | 0.01 | 1.265644 | 1.6018553 | 21.28632 | 0.087356 | 34.28 |
| 2631   | 2016 | -0.18 | 0.01 | 1.265644 | 1.6018553 | 21.38504 | 0.129724 | 54.86 |
| 300390 | 2016 | -0.39 | 0.01 | 1.265644 | 1.6018553 | 20.73802 | 0.021637 | 34.75 |
| 2160   | 2016 | 0.092 | 0.01 | 1.265644 | 1.6018553 | 22.29419 | 0.049007 | 25.42 |
| 2564   | 2016 | -0.43 | 0.01 | 1.265644 | 1.6018553 | 23.55676 | -0.11001 | 29.73 |
| 2127   | 2016 | 0.098 | 0.01 | 1.265644 | 1.6018553 | 21.43954 | 0.19374  | 26.78 |
| 2564   | 2016 | 0.236 | 0.01 | 1.265644 | 1.6018553 | 23.55676 | -0.11001 | 29.73 |
| 2514   | 2016 | 0.15  | 0.01 | 1.265644 | 1.6018553 | 21.02631 | -0.24088 | 26.07 |
| 600105 | 2016 | -0.12 | 0.01 | 1.265644 | 1.6018553 | 22.14018 | 0.10373  | 37.19 |
| 2635   | 2016 | 0.233 | 0.01 | 1.265644 | 1.6018553 | 21.74324 | 0.147533 | 35.18 |
| 300292 | 2016 | 0.185 | 0.01 | 1.265644 | 1.6018553 | 21.93332 | 0.066002 | 23.55 |
| 300394 | 2016 | 0.432 | 0.01 | 1.265644 | 1.6018553 | 20.51992 | 0.160586 | 46.95 |
| 2635   | 2016 | 0.233 | 0.01 | 1.265644 | 1.6018553 | 21.90379 | 0.147533 | 35.18 |
| 300342 | 2016 | 0.016 | 0.01 | 1.265644 | 1.6018553 | 21.11062 | 0.133981 | 46.04 |
| 551    | 2016 | -0.23 | 0.01 | 1.265644 | 1.6018553 | 22.11234 | 0.052058 | 34.33 |
| 2160   | 2016 | -0.41 | 0.01 | 1.265644 | 1.6018553 | 22.29419 | 0.049007 | 25.42 |
| 777    | 2016 | -0.6  | 0.01 | 1.265644 | 1.6018553 | 21.37778 | 0.079334 | 17.92 |
| 2172   | 2016 | 0.183 | 0.01 | 1.265644 | 1.6018553 | 22.13973 | 0.20452  | 49.1  |
| 300013 | 2016 | -0.62 | 0.01 | 1.265644 | 1.6018553 | 21.41402 | 0.044805 | 11.72 |
| 2384   | 2016 | -0.23 | 0.01 | 1.265644 | 1.6018553 | 23.44053 | 0.054295 | 23.26 |
| 2245   | 2016 | -0    | 0.01 | 1.265644 | 1.6018553 | 22.33805 | 0.098688 | 32.59 |
| 2081   | 2016 | -0.01 | 0.01 | 1.265644 | 1.6018553 | 24.01251 | 0.167188 | 24.7  |
| 603017 | 2016 | 0.07  | 0.01 | 1.265644 | 1.6018553 | 21.6605  | 0.080092 | 36.84 |
| 603699 | 2016 | -0.23 | 0.01 | 1.265644 | 1.6018553 | 22.12005 | 0.083807 | 53.15 |
| 300416 | 2016 | 0.072 | 0.01 | 1.265644 | 1.6018553 | 20.45554 | 0.115216 | 47.77 |
| 300416 | 2016 | 0.147 | 0.01 | 1.265644 | 1.6018553 | 20.45554 | 0.115216 | 47.77 |
| 300346 | 2016 | 1.982 | 0.01 | 1.265644 | 1.6018553 | 20.97408 | 0.004321 | 15.15 |
| 2255   | 2016 | -0.26 | 0.01 | 1.265644 | 1.6018553 | 21.88021 | 0.033979 | 15.5  |
| 600487 | 2016 | 0.113 | 0.01 | 1.265644 | 1.6018553 | 23.70563 | 0.224366 | 19.34 |
| 600200 | 2016 | 0.5   | 0.01 | 1.265644 | 1.6018553 | 22.3795  | 0.026293 | 17.01 |
| 603699 | 2016 | 0.289 | 0.01 | 1.265644 | 1.6018553 | 22.12005 | 0.083807 | 53.15 |
| 600200 | 2016 | 0.5   | 0.01 | 1.265644 | 1.6018553 | 22.3795  | 0.026293 | 17.01 |
| 300331 | 2016 | 0.758 | 0.01 | 1.265644 | 1.6018553 | 21.32385 | 0.020906 | 27.01 |
| 603355 | 2016 | -0.28 | 0.01 | 1.265644 | 1.6018553 | 22.13781 | 0.168229 | 45.79 |
| 2079   | 2016 | -0.2  | 0.01 | 1.265644 | 1.6018553 | 21.28632 | 0.087356 | 34.28 |
| 603017 | 2016 | 0.07  | 0.01 | 1.265644 | 1.6018553 | 21.6605  | 0.080092 | 36.84 |
| 600487 | 2016 | 0.113 | 0.01 | 1.265644 | 1.6018553 | 23.70563 | 0.224366 | 19.34 |
| 2453   | 2016 | 0.298 | 0.01 | 1.265644 | 1.6018553 | 21.52    | -0.26182 | 21.68 |
| 300342 | 2016 | -0.51 | 0.01 | 1.265644 | 1.6018553 | 21.11062 | 0.133981 | 46.04 |
| 300228 | 2016 | -0.49 | 0.01 | 1.265644 | 1.6018553 | 22.09125 | -0.16623 | 10.47 |
| 2091   | 2016 | -0.72 | 0.01 | 1.265644 | 1.6018553 | 23.3767  | 0.202881 | 30.02 |
| 300292 | 2016 | -0.01 | 0.01 | 1.265644 | 1.6018553 | 21.93332 | 0.066002 | 23.55 |
| 603355 | 2016 | -0.68 | 0.01 | 1.265644 | 1.6018553 | 22.35157 | 0.168229 | 45.79 |
| 2127   | 2016 | 0.098 | 0.01 | 1.265644 | 1.6018553 | 21.43954 | 0.19374  | 26.78 |
| 2491   | 2016 | -0.08 | 0.01 | 1.265644 | 1.6018553 | 22.6314  | 0.187584 | 38.41 |
| 2127   | 2016 | 0.098 | 0.01 | 1.265644 | 1.6018553 | 21.91852 | 0.19374  | 26.78 |
| 600487 | 2016 | 0.007 | 0.01 | 1.265644 | 1.6018553 | 23.70563 | 0.224366 | 19.34 |
| 2079   | 2016 | -0.2  | 0.01 | 1.265644 | 1.6018553 | 21.28632 | 0.087356 | 34.28 |
| 600200 | 2016 | 0.5   | 0.01 | 1.265644 | 1.6018553 | 22.3795  | 0.026293 | 17.01 |
| 2787   | 2016 | -0.01 | 0.01 | 1.265644 | 1.6018553 | 20.91213 | 0.113299 | 43.18 |
| 300211 | 2016 | 0.548 | 0.01 | 1.265644 | 1.6018553 | 20.18635 | 0.007589 | 48.4  |
| 300292 | 2016 | 0.057 | 0.01 | 1.265644 | 1.6018553 | 21.93332 | 0.066002 | 23.55 |

|        |      |       |      |          |            |          |          |       |
|--------|------|-------|------|----------|------------|----------|----------|-------|
| 2547   | 2016 | -0.33 | 0.01 | 1.265644 | 1.6018553  | 22.16738 | 0.076619 | 42.96 |
| 551    | 2016 | -0.73 | 0.01 | 1.265644 | 1.6018553  | 22.11234 | 0.052058 | 34.33 |
| 2426   | 2016 | 0.109 | 0.01 | 1.265644 | 1.6018553  | 23.52926 | 0.054352 | 27.69 |
| 300390 | 2016 | -0.5  | 0.01 | 1.265644 | 1.6018553  | 20.60804 | 0.021637 | 34.75 |
| 2787   | 2016 | -0.3  | 0.01 | 1.265644 | 1.6018553  | 20.91213 | 0.113299 | 43.18 |
| 2435   | 2016 | -0.19 | 0.01 | 1.265644 | 1.6018553  | 22.49594 | 0.059093 | 36.81 |
| 300165 | 2016 | 0.31  | 0.01 | 1.265644 | 1.6018553  | 21.46888 | 0.034526 | 37.34 |
| 601700 | 2016 | -0.04 | 0.01 | 1.265644 | 1.6018553  | 22.32014 | 0.068443 | 29.24 |
| 2089   | 2016 | 0.388 | 0.01 | 1.265644 | 1.6018553  | 22.40511 | 0.028052 | 18.05 |
| 601700 | 2016 | -0.04 | 0.01 | 1.265644 | 1.6018553  | 22.32014 | 0.068443 | 29.24 |
| 603355 | 2016 | -0.28 | 0.01 | 1.265644 | 1.6018553  | 22.35157 | 0.168229 | 45.79 |
| 2384   | 2016 | -0.01 | 0.01 | 1.265644 | 1.6018553  | 23.44053 | 0.054295 | 23.26 |
| 300215 | 2016 | -0.05 | 0.01 | 1.265644 | 1.6018553  | 22.04231 | 0.037283 | 28.35 |
| 300292 | 2016 | -0.06 | 0.01 | 1.265644 | 1.6018553  | 21.93332 | 0.066002 | 23.55 |
| 2367   | 2016 | 0.022 | 0.01 | 1.265644 | 1.6018553  | 22.37362 | 0.121874 | 44.96 |
| 2787   | 2016 | -0.3  | 0.01 | 1.265644 | 1.6018553  | 20.91213 | 0.113299 | 43.18 |
| 300331 | 2016 | 0.349 | 0.01 | 1.265644 | 1.6018553  | 21.32385 | 0.020906 | 27.01 |
| 300416 | 2016 | 0.391 | 0.01 | 1.265644 | 1.6018553  | 20.45554 | 0.115216 | 47.77 |
| 2150   | 2016 | -0.81 | 0.01 | 1.265644 | 1.6018553  | 21.03941 | 0.099228 | 38.32 |
| 300165 | 2016 | 0.31  | 0.01 | 1.265644 | 1.6018553  | 21.46888 | 0.034526 | 37.34 |
| 2491   | 2016 | 0.274 | 0.01 | 1.265644 | 1.6018553  | 22.6314  | 0.187584 | 38.41 |
| 551    | 2016 | -0.73 | 0.01 | 1.265644 | 1.6018553  | 22.11234 | 0.052058 | 34.33 |
| 300215 | 2016 | -0.05 | 0.01 | 1.265644 | 1.6018553  | 22.04231 | 0.037283 | 28.35 |
| 600487 | 2016 | -0.35 | 0.01 | 1.265644 | 1.6018553  | 23.70563 | 0.224366 | 19.34 |
| 300128 | 2016 | 0.421 | 0.01 | 1.265644 | 1.6018553  | 21.98054 | 0.026014 | 20.35 |
| 2089   | 2016 | 0.289 | 0.01 | 1.265644 | 1.6018553  | 22.40511 | 0.028052 | 18.05 |
| 2160   | 2016 | -0.41 | 0.01 | 1.265644 | 1.6018553  | 22.29419 | 0.049007 | 25.42 |
| 600487 | 2016 | -0.06 | 0.01 | 1.265644 | 1.6018553  | 23.70563 | 0.224366 | 19.34 |
| 300393 | 2016 | 0.231 | 0.01 | 1.265644 | 1.6018553  | 21.96732 | 0.165492 | 31.6  |
| 300393 | 2016 | -0.08 | 0.01 | 1.265644 | 1.6018553  | 21.96732 | 0.165492 | 31.6  |
| 300165 | 2016 | 0.31  | 0.01 | 1.265644 | 1.6018553  | 21.46888 | 0.034526 | 37.34 |
| 551    | 2016 | -0.07 | 0.01 | 1.265644 | 1.6018553  | 21.17441 | 0.052058 | 34.33 |
| 2367   | 2016 | 0.038 | 0.01 | 1.265644 | 1.6018553  | 22.24352 | 0.121874 | 44.96 |
| 603828 | 2016 | -0.15 | 0.01 | 1.265644 | 1.6018553  | 21.79709 | 0.050633 | 37.4  |
| 2290   | 2016 | 0.212 | 0.01 | 1.265644 | 1.6018553  | 21.39331 | 0.023201 | 27.49 |
| 2160   | 2016 | 0.092 | 0.01 | 1.265644 | 1.6018553  | 22.29419 | 0.049007 | 25.42 |
| 2255   | 2016 | -0.26 | 0.01 | 1.265644 | 1.6018553  | 22.02898 | 0.033979 | 15.5  |
| 300013 | 2016 | -0.62 | 0.01 | 1.265644 | 1.6018553  | 21.41402 | 0.044805 | 11.72 |
| 600487 | 2016 | -0.52 | 0.01 | 1.265644 | 1.6018553  | 23.70563 | 0.224366 | 19.34 |
| 2245   | 2016 | 0.311 | 0.01 | 1.265644 | 1.6018553  | 22.33805 | 0.098688 | 32.59 |
| 2127   | 2016 | 0.098 | 0.01 | 1.265644 | 1.6018553  | 21.43954 | 0.19374  | 26.78 |
| 300394 | 2016 | 0.432 | 0.01 | 1.265644 | 1.6018553  | 20.51992 | 0.160586 | 46.95 |
| 300211 | 2016 | 0.548 | 0.01 | 1.265644 | 1.6018553  | 20.18635 | 0.007589 | 48.4  |
| 300325 | 2016 | 1.046 | 0.01 | 1.265644 | 1.6018553  | 21.84299 | 0.051767 | 38.23 |
| 2091   | 2016 | -0.72 | 0.01 | 1.265644 | 1.6018553  | 22.61492 | 0.202881 | 30.02 |
| 300292 | 2016 | 0.185 | 0.01 | 1.265644 | 1.6018553  | 21.93332 | 0.066002 | 23.55 |
| 2255   | 2016 | 0.004 | 0.01 | 1.265644 | 1.6018553  | 22.02898 | 0.033979 | 15.5  |
| 600487 | 2016 | 0.375 | 0.01 | 1.265644 | 1.6018553  | 23.70563 | 0.224366 | 19.34 |
| 300342 | 2016 | 0.149 | 0.01 | 1.265644 | 1.6018553  | 21.19503 | 0.133981 | 46.04 |
| 2081   | 2016 | 0.015 | 0.01 | 1.265644 | 1.6018553  | 24.01251 | 0.167188 | 24.7  |
| 637    | 2016 | -0.45 | 0.05 | 0.858509 | 0.73703854 | 20.97    | 0.078129 | 29.5  |
| 637    | 2016 | -0.45 | 0.05 | 0.858509 | 0.73703854 | 20.97    | 0.078129 | 29.5  |
| 637    | 2016 | -0.45 | 0.05 | 0.858509 | 0.73703854 | 20.97    | 0.078129 | 29.5  |
| 637    | 2016 | -0.45 | 0.05 | 0.858509 | 0.73703854 | 20.51361 | 0.078129 | 29.5  |

|        |      |       |      |          |            |          |          |       |
|--------|------|-------|------|----------|------------|----------|----------|-------|
| 637    | 2016 | -0.45 | 0.05 | 0.858509 | 0.73703854 | 20.97    | 0.078129 | 29.5  |
| 637    | 2016 | -0.45 | 0.05 | 0.858509 | 0.73703854 | 20.97    | 0.078129 | 29.5  |
| 300395 | 2016 | -0.12 | 0.05 | 0.918957 | 0.84448155 | 20.75789 | 0.132408 | 15.16 |
| 600260 | 2016 | 0.092 | 0.05 | 0.918957 | 0.84448155 | 23.35555 | 0.0733   | 22.23 |
| 600566 | 2016 | -0.15 | 0.05 | 0.918957 | 0.84448155 | 22.33022 | 0.253387 | 51.48 |
| 600703 | 2016 | 0.035 | 0.05 | 0.918957 | 0.84448155 | 23.40988 | 0.124266 | 29.76 |
| 600566 | 2016 | -0.26 | 0.05 | 0.918957 | 0.84448155 | 22.78205 | 0.253387 | 51.48 |
| 600566 | 2016 | 0.595 | 0.05 | 0.918957 | 0.84448155 | 22.33022 | 0.253387 | 51.48 |
| 300395 | 2016 | -0.12 | 0.05 | 0.918957 | 0.84448155 | 20.75789 | 0.132408 | 15.16 |
| 600260 | 2016 | -0.42 | 0.05 | 0.918957 | 0.84448155 | 23.35555 | 0.0733   | 22.23 |
| 600566 | 2016 | -0.26 | 0.05 | 0.918957 | 0.84448155 | 22.33022 | 0.253387 | 51.48 |
| 600703 | 2016 | 0.035 | 0.05 | 0.918957 | 0.84448155 | 23.88338 | 0.124266 | 29.76 |
| 600566 | 2016 | 0.321 | 0.05 | 0.918957 | 0.84448155 | 22.33022 | 0.253387 | 51.48 |
| 600703 | 2016 | 0.283 | 0.05 | 0.918957 | 0.84448155 | 23.88338 | 0.124266 | 29.76 |
| 300395 | 2016 | -0.04 | 0.05 | 0.918957 | 0.84448155 | 20.72901 | 0.132408 | 15.16 |
| 600260 | 2016 | -0.42 | 0.05 | 0.918957 | 0.84448155 | 23.35555 | 0.0733   | 22.23 |
| 300395 | 2016 | -0.26 | 0.05 | 0.918957 | 0.84448155 | 20.75789 | 0.132408 | 15.16 |
| 600703 | 2016 | -0.08 | 0.05 | 0.918957 | 0.84448155 | 23.88338 | 0.124266 | 29.76 |
| 600566 | 2016 | -0.58 | 0.05 | 0.918957 | 0.84448155 | 22.33022 | 0.253387 | 51.48 |
| 670    | 2016 | 2.341 | 0.05 | 0.918957 | 0.84448155 | 20.4996  | 0.032831 | 25.92 |
| 670    | 2016 | 2.341 | 0.05 | 0.918957 | 0.84448155 | 21.03125 | 0.032831 | 25.92 |
| 670    | 2016 | 2.341 | 0.05 | 0.918957 | 0.84448155 | 20.4996  | 0.032831 | 25.92 |
| 553    | 2016 | 0.364 | 0.05 | 0.918957 | 0.84448155 | 21.81683 | -0.03715 | 20.15 |
| 600703 | 2016 | -0.34 | 0.05 | 0.918957 | 0.84448155 | 23.88338 | 0.124266 | 29.76 |
| 600703 | 2016 | 0.109 | 0.05 | 0.918957 | 0.84448155 | 23.88338 | 0.124266 | 29.76 |
| 600703 | 2016 | 0.677 | 0.05 | 0.918957 | 0.84448155 | 23.88338 | 0.124266 | 29.76 |
| 600703 | 2016 | 0.378 | 0.05 | 0.918957 | 0.84448155 | 23.88338 | 0.124266 | 29.76 |
| 600260 | 2016 | 0.459 | 0.05 | 0.918957 | 0.84448155 | 23.35555 | 0.0733   | 22.23 |
| 600566 | 2016 | 0.595 | 0.05 | 0.918957 | 0.84448155 | 22.33022 | 0.253387 | 51.48 |
| 600703 | 2016 | -0.27 | 0.05 | 0.918957 | 0.84448155 | 23.88338 | 0.124266 | 29.76 |
| 600566 | 2016 | -0.26 | 0.05 | 0.918957 | 0.84448155 | 22.33022 | 0.253387 | 51.48 |
| 600260 | 2016 | 0.101 | 0.05 | 0.918957 | 0.84448155 | 23.35555 | 0.0733   | 22.23 |
| 600566 | 2016 | -0.26 | 0.05 | 0.918957 | 0.84448155 | 22.33022 | 0.253387 | 51.48 |
| 553    | 2016 | 0.364 | 0.05 | 0.918957 | 0.84448155 | 21.81384 | -0.03715 | 20.15 |
| 300395 | 2016 | -0.19 | 0.05 | 0.918957 | 0.84448155 | 20.75789 | 0.132408 | 15.16 |
| 600260 | 2016 | 0.238 | 0.05 | 0.918957 | 0.84448155 | 23.18873 | 0.0733   | 22.23 |
| 600260 | 2016 | 0.101 | 0.05 | 0.918957 | 0.84448155 | 23.35555 | 0.0733   | 22.23 |
| 600260 | 2016 | 0.57  | 0.05 | 0.918957 | 0.84448155 | 23.35555 | 0.0733   | 22.23 |
| 600703 | 2016 | 0.355 | 0.05 | 0.918957 | 0.84448155 | 23.88338 | 0.124266 | 29.76 |
| 600703 | 2016 | -0.34 | 0.05 | 0.918957 | 0.84448155 | 23.88338 | 0.124266 | 29.76 |
| 600260 | 2016 | -0.23 | 0.05 | 0.918957 | 0.84448155 | 23.35555 | 0.0733   | 22.23 |
| 600260 | 2016 | 0.901 | 0.05 | 0.918957 | 0.84448155 | 23.35555 | 0.0733   | 22.23 |
| 670    | 2016 | 2.341 | 0.05 | 0.918957 | 0.84448155 | 20.4996  | 0.032831 | 25.92 |
| 760    | 2016 | 1.271 | 0.05 | 0.918957 | 0.84448155 | 21.81955 | 0.020912 | 14.91 |
| 760    | 2016 | 1.271 | 0.05 | 0.918957 | 0.84448155 | 21.51073 | 0.020912 | 14.91 |
| 553    | 2016 | 0.364 | 0.05 | 0.918957 | 0.84448155 | 21.81683 | -0.03715 | 20.15 |
| 760    | 2016 | 1.271 | 0.05 | 0.918957 | 0.84448155 | 21.81955 | 0.020912 | 14.91 |
| 600703 | 2016 | 0.103 | 0.05 | 0.918957 | 0.84448155 | 23.88338 | 0.124266 | 29.76 |
| 300395 | 2016 | -0.15 | 0.05 | 0.918957 | 0.84448155 | 20.75789 | 0.132408 | 15.16 |
| 600566 | 2016 | -0.26 | 0.05 | 0.918957 | 0.84448155 | 22.33022 | 0.253387 | 51.48 |
| 600703 | 2016 | -0.34 | 0.05 | 0.918957 | 0.84448155 | 23.88338 | 0.124266 | 29.76 |
| 2783   | 2016 | -0.09 | 0.05 | 0.510826 | 0.26094302 | 21.36384 | 0.079236 | 16.72 |
| 2783   | 2016 | -0.55 | 0.05 | 0.510826 | 0.26094302 | 21.36384 | 0.079236 | 16.72 |
| 627    | 2016 | -0.2  | 0.05 | 0.510826 | 0.26094302 | 25.49291 | 0.152413 | 42.92 |



|        |      |       |      |          |            |          |          |       |
|--------|------|-------|------|----------|------------|----------|----------|-------|
| 821    | 2016 | -0.52 | 0.05 | 0.510826 | 0.26094302 | 21.80617 | 0.052349 | 26.35 |
| 2783   | 2016 | -0.55 | 0.05 | 0.510826 | 0.26094302 | 21.36384 | 0.079236 | 16.72 |
| 902    | 2016 | -0.85 | 0.05 | 0.510826 | 0.26094302 | 22.36886 | 0.108522 | 47.15 |
| 2783   | 2016 | 0.005 | 0.05 | 0.510826 | 0.26094302 | 21.36384 | 0.079236 | 16.72 |
| 821    | 2016 | -0.24 | 0.05 | 0.510826 | 0.26094302 | 21.80617 | 0.052349 | 26.35 |
| 627    | 2016 | 0.485 | 0.05 | 0.510826 | 0.26094302 | 25.49291 | 0.152413 | 42.92 |
| 2783   | 2016 | -0.33 | 0.05 | 0.510826 | 0.26094302 | 21.36384 | 0.079236 | 16.72 |
| 2783   | 2016 | 0.005 | 0.05 | 0.510826 | 0.26094302 | 21.15983 | 0.079236 | 16.72 |
| 821    | 2016 | -0.25 | 0.05 | 0.510826 | 0.26094302 | 21.80617 | 0.052349 | 26.35 |
| 902    | 2016 | -0.59 | 0.05 | 0.510826 | 0.26094302 | 22.78874 | 0.108522 | 47.15 |
| 821    | 2016 | -0.26 | 0.05 | 0.510826 | 0.26094302 | 21.80617 | 0.052349 | 26.35 |
| 627    | 2016 | -0.28 | 0.05 | 0.510826 | 0.26094302 | 25.49291 | 0.152413 | 42.92 |
| 627    | 2016 | -0.28 | 0.05 | 0.510826 | 0.26094302 | 25.49291 | 0.152413 | 42.92 |
| 627    | 2016 | 0.142 | 0.05 | 0.510826 | 0.26094302 | 25.49291 | 0.152413 | 42.92 |
| 821    | 2016 | -0.24 | 0.05 | 0.510826 | 0.26094302 | 21.80617 | 0.052349 | 26.35 |
| 2783   | 2016 | 0.091 | 0.05 | 0.510826 | 0.26094302 | 21.36384 | 0.079236 | 16.72 |
| 902    | 2016 | -0.85 | 0.05 | 0.510826 | 0.26094302 | 22.78874 | 0.108522 | 47.15 |
| 821    | 2016 | -0.52 | 0.05 | 0.510826 | 0.26094302 | 21.60461 | 0.052349 | 26.35 |
| 821    | 2016 | -0.29 | 0.05 | 0.510826 | 0.26094302 | 21.80617 | 0.052349 | 26.35 |
| 902    | 2016 | -0.59 | 0.05 | 0.510826 | 0.26094302 | 22.78874 | 0.108522 | 47.15 |
| 902    | 2016 | -0.59 | 0.05 | 0.510826 | 0.26094302 | 22.78874 | 0.108522 | 47.15 |
| 902    | 2016 | -0.63 | 0.05 | 0.510826 | 0.26094302 | 22.78874 | 0.108522 | 47.15 |
| 821    | 2016 | -0.25 | 0.05 | 0.510826 | 0.26094302 | 21.80617 | 0.052349 | 26.35 |
| 821    | 2016 | -0.52 | 0.05 | 0.510826 | 0.26094302 | 21.80617 | 0.052349 | 26.35 |
| 2783   | 2016 | -0.55 | 0.05 | 0.510826 | 0.26094302 | 21.36384 | 0.079236 | 16.72 |
| 627    | 2016 | 0.142 | 0.05 | 0.510826 | 0.26094302 | 25.49291 | 0.152413 | 42.92 |
| 627    | 2016 | -0.28 | 0.05 | 0.510826 | 0.26094302 | 23.17019 | 0.152413 | 42.92 |
| 818    | 2016 | -0.57 | 0    | 1.346227 | 1.8123279  | 21.70374 | 0.04809  | 28.68 |
| 818    | 2016 | -0.57 | 0    | 1.346227 | 1.8123279  | 21.70374 | 0.04809  | 28.68 |
| 818    | 2016 | -0.57 | 0    | 1.346227 | 1.8123279  | 21.70374 | 0.04809  | 28.68 |
| 818    | 2016 | -0.57 | 0    | 1.346227 | 1.8123279  | 21.70374 | 0.04809  | 28.68 |
| 818    | 2016 | -0.57 | 0    | 1.346227 | 1.8123279  | 21.65956 | 0.04809  | 28.68 |
| 818    | 2016 | -0.57 | 0    | 1.346227 | 1.8123279  | 21.70374 | 0.04809  | 28.68 |
| 751    | 2016 | 0.336 | 0    | 1.346227 | 1.8123279  | 22.14516 | 0.06276  | 23.59 |
| 751    | 2016 | 0.336 | 0    | 1.346227 | 1.8123279  | 22.14511 | 0.06276  | 23.59 |
| 751    | 2016 | 0.336 | 0    | 1.346227 | 1.8123279  | 22.14516 | 0.06276  | 23.59 |
| 600552 | 2016 | -0.31 | 0.03 | 0.17081  | 0.02917596 | 21.62962 | 0.040623 | 21.74 |
| 600502 | 2016 | -0.48 | 0.03 | 0.17081  | 0.02917596 | 23.574   | 0.073094 | 16.07 |
| 600552 | 2016 | 0.17  | 0.03 | 0.17081  | 0.02917596 | 22.30701 | 0.040623 | 21.74 |
| 2005   | 2016 | -0.29 | 0.03 | 0.17081  | 0.02917596 | 23.32815 | 0.00478  | 20.94 |
| 2005   | 2016 | -0.3  | 0.03 | 0.17081  | 0.02917596 | 23.32815 | 0.00478  | 20.94 |
| 930    | 2016 | 0.65  | 0.03 | 0.17081  | 0.02917596 | 22.41613 | 0.07811  | 15.76 |
| 600552 | 2016 | 0.699 | 0.03 | 0.17081  | 0.02917596 | 22.30701 | 0.040623 | 21.74 |
| 2005   | 2016 | -0.22 | 0.03 | 0.17081  | 0.02917596 | 23.32815 | 0.00478  | 20.94 |
| 2005   | 2016 | -0.3  | 0.03 | 0.17081  | 0.02917596 | 23.32815 | 0.00478  | 20.94 |
| 2005   | 2016 | -0.3  | 0.03 | 0.17081  | 0.02917596 | 23.32815 | 0.00478  | 20.94 |
| 600502 | 2016 | -0.49 | 0.03 | 0.17081  | 0.02917596 | 23.574   | 0.073094 | 16.07 |
| 600552 | 2016 | 0.329 | 0.03 | 0.17081  | 0.02917596 | 22.30701 | 0.040623 | 21.74 |
| 2005   | 2016 | 0.245 | 0.03 | 0.17081  | 0.02917596 | 23.32815 | 0.00478  | 20.94 |
| 600552 | 2016 | 0.123 | 0.03 | 0.17081  | 0.02917596 | 22.30701 | 0.040623 | 21.74 |
| 600502 | 2016 | -0.24 | 0.03 | 0.17081  | 0.02917596 | 23.4266  | 0.073094 | 16.07 |
| 600552 | 2016 | -0.18 | 0.03 | 0.17081  | 0.02917596 | 22.30701 | 0.040623 | 21.74 |
| 600502 | 2016 | -0.48 | 0.03 | 0.17081  | 0.02917596 | 23.574   | 0.073094 | 16.07 |
| 2005   | 2016 | -0.3  | 0.03 | 0.17081  | 0.02917596 | 23.32815 | 0.00478  | 20.94 |

|        |      |       |      |          |            |          |          |       |
|--------|------|-------|------|----------|------------|----------|----------|-------|
| 600502 | 2016 | -0.02 | 0.03 | 0.17081  | 0.02917596 | 23.574   | 0.073094 | 16.07 |
| 600552 | 2016 | 0.503 | 0.03 | 0.17081  | 0.02917596 | 22.30701 | 0.040623 | 21.74 |
| 930    | 2016 | 0.65  | 0.03 | 0.17081  | 0.02917596 | 22.31556 | 0.07811  | 15.76 |
| 2005   | 2016 | -0.55 | 0.03 | 0.17081  | 0.02917596 | 23.32815 | 0.00478  | 20.94 |
| 600552 | 2016 | 0.405 | 0.03 | 0.17081  | 0.02917596 | 22.30701 | 0.040623 | 21.74 |
| 2005   | 2016 | -0.3  | 0.03 | 0.17081  | 0.02917596 | 23.32815 | 0.00478  | 20.94 |
| 2005   | 2016 | -0.48 | 0.03 | 0.17081  | 0.02917596 | 23.32815 | 0.00478  | 20.94 |
| 2005   | 2016 | -0.3  | 0.03 | 0.17081  | 0.02917596 | 23.09903 | 0.00478  | 20.94 |
| 600502 | 2016 | -0.44 | 0.03 | 0.17081  | 0.02917596 | 23.574   | 0.073094 | 16.07 |
| 600552 | 2016 | 0.218 | 0.03 | 0.17081  | 0.02917596 | 22.30701 | 0.040623 | 21.74 |
| 2005   | 2016 | -0.55 | 0.03 | 0.17081  | 0.02917596 | 23.32815 | 0.00478  | 20.94 |
| 930    | 2016 | 0.65  | 0.03 | 0.17081  | 0.02917596 | 22.41613 | 0.07811  | 15.76 |
| 600552 | 2016 | 0.321 | 0.03 | 0.17081  | 0.02917596 | 22.30701 | 0.040623 | 21.74 |
| 600552 | 2016 | 0.184 | 0.03 | 0.17081  | 0.02917596 | 22.30701 | 0.040623 | 21.74 |
| 930    | 2016 | 0.65  | 0.03 | 0.17081  | 0.02917596 | 22.41613 | 0.07811  | 15.76 |
| 2005   | 2016 | -0.3  | 0.03 | 0.17081  | 0.02917596 | 23.32815 | 0.00478  | 20.94 |
| 2005   | 2016 | -0.3  | 0.03 | 0.17081  | 0.02917596 | 23.32815 | 0.00478  | 20.94 |
| 930    | 2016 | 0.65  | 0.03 | 0.17081  | 0.02917596 | 22.41613 | 0.07811  | 15.76 |
| 930    | 2016 | 0.65  | 0.03 | 0.17081  | 0.02917596 | 22.41613 | 0.07811  | 15.76 |
| 930    | 2016 | 0.65  | 0.03 | 0.17081  | 0.02917596 | 22.41613 | 0.07811  | 15.76 |
| 2005   | 2016 | -0.3  | 0.03 | 0.17081  | 0.02917596 | 23.32815 | 0.00478  | 20.94 |
| 2005   | 2016 | -0.22 | 0.03 | 0.17081  | 0.02917596 | 23.32815 | 0.00478  | 20.94 |
| 930    | 2016 | 0.65  | 0.03 | 0.17081  | 0.02917596 | 22.41613 | 0.07811  | 15.76 |
| 2005   | 2016 | -0.11 | 0.03 | 0.17081  | 0.02917596 | 23.32815 | 0.00478  | 20.94 |
| 600502 | 2016 | -0.34 | 0.03 | 0.17081  | 0.02917596 | 23.574   | 0.073094 | 16.07 |
| 600559 | 2016 | -0.69 | 0    | 1.309556 | 1.714938   | 21.88776 | 0.068966 | 28.85 |
| 600559 | 2016 | -0.69 | 0    | 1.309556 | 1.714938   | 21.88776 | 0.068966 | 28.85 |
| 600559 | 2016 | -0.69 | 0    | 1.309556 | 1.714938   | 21.47053 | 0.068966 | 28.85 |
| 2061   | 2016 | 0.339 | 0.04 | 1.107077 | 1.2256188  | 21.69253 | 0.041189 | 43.06 |
| 300257 | 2016 | -0.68 | 0.04 | 1.107077 | 1.2256188  | 22.33856 | 0.028928 | 56.54 |
| 300257 | 2016 | -0.36 | 0.04 | 1.107077 | 1.2256188  | 22.33856 | 0.028928 | 56.54 |
| 2061   | 2016 | 0.478 | 0.04 | 1.107077 | 1.2256188  | 22.26986 | 0.041189 | 43.06 |
| 600160 | 2016 | 0.252 | 0.04 | 1.107077 | 1.2256188  | 23.19649 | 0.014762 | 51.91 |
| 600160 | 2016 | -0.14 | 0.04 | 1.107077 | 1.2256188  | 23.19649 | 0.014762 | 51.91 |
| 2061   | 2016 | -0.15 | 0.04 | 1.107077 | 1.2256188  | 22.26986 | 0.041189 | 43.06 |
| 300257 | 2016 | -0.01 | 0.04 | 1.107077 | 1.2256188  | 22.33856 | 0.028928 | 56.54 |
| 600160 | 2016 | -0.14 | 0.04 | 1.107077 | 1.2256188  | 23.19649 | 0.014762 | 51.91 |
| 600160 | 2016 | -0.13 | 0.04 | 1.107077 | 1.2256188  | 23.19649 | 0.014762 | 51.91 |
| 600160 | 2016 | -0.14 | 0.04 | 1.107077 | 1.2256188  | 23.19649 | 0.014762 | 51.91 |
| 600160 | 2016 | -0.26 | 0.04 | 1.107077 | 1.2256188  | 23.19649 | 0.014762 | 51.91 |
| 600160 | 2016 | -0.14 | 0.04 | 1.107077 | 1.2256188  | 23.19649 | 0.014762 | 51.91 |
| 600160 | 2016 | 0.037 | 0.04 | 1.107077 | 1.2256188  | 23.19649 | 0.014762 | 51.91 |
| 300257 | 2016 | -0.1  | 0.04 | 1.107077 | 1.2256188  | 22.33856 | 0.028928 | 56.54 |
| 2061   | 2016 | -0.2  | 0.04 | 1.107077 | 1.2256188  | 22.26986 | 0.041189 | 43.06 |
| 300257 | 2016 | -0.68 | 0.04 | 1.107077 | 1.2256188  | 22.33856 | 0.028928 | 56.54 |
| 600160 | 2016 | -0.14 | 0.04 | 1.107077 | 1.2256188  | 23.19649 | 0.014762 | 51.91 |
| 300257 | 2016 | -0.68 | 0.04 | 1.107077 | 1.2256188  | 22.33856 | 0.028928 | 56.54 |
| 2061   | 2016 | -0.22 | 0.04 | 1.107077 | 1.2256188  | 22.26986 | 0.041189 | 43.06 |
| 600160 | 2016 | 0.093 | 0.04 | 1.107077 | 1.2256188  | 23.19649 | 0.014762 | 51.91 |
| 300257 | 2016 | -0.29 | 0.04 | 1.107077 | 1.2256188  | 22.33856 | 0.028928 | 56.54 |
| 600160 | 2016 | -0.14 | 0.04 | 1.107077 | 1.2256188  | 23.19649 | 0.014762 | 51.91 |
| 2061   | 2016 | 0.17  | 0.04 | 1.107077 | 1.2256188  | 22.26986 | 0.041189 | 43.06 |
| 600160 | 2016 | 0.191 | 0.04 | 1.107077 | 1.2256188  | 23.19649 | 0.014762 | 51.91 |
| 600160 | 2016 | -0.13 | 0.04 | 1.107077 | 1.2256188  | 23.10534 | 0.014762 | 51.91 |

|        |      |       |      |          |           |          |          |       |
|--------|------|-------|------|----------|-----------|----------|----------|-------|
| 2061   | 2016 | -0.09 | 0.04 | 1.107077 | 1.2256188 | 22.26986 | 0.041189 | 43.06 |
| 600160 | 2016 | 0.534 | 0.04 | 1.107077 | 1.2256188 | 23.19649 | 0.014762 | 51.91 |
| 300257 | 2016 | -0.29 | 0.04 | 1.107077 | 1.2256188 | 22.21053 | 0.028928 | 56.54 |
| 600160 | 2016 | -0.14 | 0.04 | 1.107077 | 1.2256188 | 23.19649 | 0.014762 | 51.91 |
| 300257 | 2016 | -0.3  | 0.04 | 1.107077 | 1.2256188 | 22.33856 | 0.028928 | 56.54 |
| 2061   | 2016 | -0.47 | 0.04 | 1.107077 | 1.2256188 | 22.26986 | 0.041189 | 43.06 |
| 600160 | 2016 | 0.037 | 0.04 | 1.107077 | 1.2256188 | 23.19649 | 0.014762 | 51.91 |
| 600455 | 2016 | -0.08 | 0.03 | 1.131657 | 1.2806466 | 20.10336 | -0.04221 | 20.6  |
| 2149   | 2016 | 0.348 | 0.03 | 1.131657 | 1.2806466 | 21.92556 | 0.021188 | 28.89 |
| 600984 | 2016 | -0.39 | 0.03 | 1.131657 | 1.2806466 | 21.90541 | 0.025771 | 21.25 |
| 600984 | 2016 | -0.16 | 0.03 | 1.131657 | 1.2806466 | 22.43243 | 0.025771 | 21.25 |
| 601369 | 2016 | 0.24  | 0.03 | 1.131657 | 1.2806466 | 23.40753 | 0.035257 | 58.57 |
| 600343 | 2016 | -0.25 | 0.03 | 1.131657 | 1.2806466 | 22.1946  | 0.013658 | 28.78 |
| 600893 | 2016 | -0.39 | 0.03 | 1.131657 | 1.2806466 | 24.62211 | 0.048514 | 30.62 |
| 600984 | 2016 | -0.39 | 0.03 | 1.131657 | 1.2806466 | 22.43243 | 0.025771 | 21.25 |
| 300140 | 2016 | -0.35 | 0.03 | 1.131657 | 1.2806466 | 21.88195 | 0.070553 | 21.1  |
| 768    | 2016 | -0.06 | 0.03 | 1.131657 | 1.2806466 | 24.39237 | 0.025701 | 38.18 |
| 600893 | 2016 | 0.173 | 0.03 | 1.131657 | 1.2806466 | 24.62211 | 0.048514 | 30.62 |
| 601369 | 2016 | 0.24  | 0.03 | 1.131657 | 1.2806466 | 23.40753 | 0.035257 | 58.57 |
| 600455 | 2016 | -0.08 | 0.03 | 1.131657 | 1.2806466 | 20.33201 | -0.04221 | 20.6  |
| 2149   | 2016 | 0.387 | 0.03 | 1.131657 | 1.2806466 | 21.6384  | 0.021188 | 28.89 |
| 601012 | 2016 | -0.13 | 0.03 | 1.131657 | 1.2806466 | 23.67674 | 0.153667 | 14.94 |
| 600343 | 2016 | -0.13 | 0.03 | 1.131657 | 1.2806466 | 22.1946  | 0.013658 | 28.78 |
| 600893 | 2016 | -0.2  | 0.03 | 1.131657 | 1.2806466 | 23.81614 | 0.048514 | 30.62 |
| 601179 | 2016 | -0.67 | 0.03 | 1.131657 | 1.2806466 | 24.26892 | 0.056428 | 51.29 |
| 812    | 2016 | -0.81 | 0.03 | 1.131657 | 1.2806466 | 21.30862 | 0.050758 | 16.61 |
| 600984 | 2016 | -0.6  | 0.03 | 1.131657 | 1.2806466 | 22.43243 | 0.025771 | 21.25 |
| 812    | 2016 | -0.81 | 0.03 | 1.131657 | 1.2806466 | 21.30862 | 0.050758 | 16.61 |
| 600984 | 2016 | -0.6  | 0.03 | 1.131657 | 1.2806466 | 22.43243 | 0.025771 | 21.25 |
| 601369 | 2016 | 0.24  | 0.03 | 1.131657 | 1.2806466 | 23.40753 | 0.035257 | 58.57 |
| 300103 | 2016 | -0.48 | 0.03 | 1.131657 | 1.2806466 | 20.72101 | 0.027675 | 29.95 |
| 300397 | 2016 | 0.839 | 0.03 | 1.131657 | 1.2806466 | 21.21862 | -0.05225 | 39.9  |
| 600984 | 2016 | -0.6  | 0.03 | 1.131657 | 1.2806466 | 22.43243 | 0.025771 | 21.25 |
| 300116 | 2016 | -0.72 | 0.03 | 1.131657 | 1.2806466 | 23.76309 | 0.054658 | 13.58 |
| 601012 | 2016 | -0.51 | 0.03 | 1.131657 | 1.2806466 | 23.67674 | 0.153667 | 14.94 |
| 600343 | 2016 | -0.66 | 0.03 | 1.131657 | 1.2806466 | 22.1946  | 0.013658 | 28.78 |
| 300397 | 2016 | 1.378 | 0.03 | 1.131657 | 1.2806466 | 21.21862 | -0.05225 | 39.9  |
| 601179 | 2016 | -0.43 | 0.03 | 1.131657 | 1.2806466 | 24.26892 | 0.056428 | 51.29 |
| 300164 | 2016 | 0.336 | 0.03 | 1.131657 | 1.2806466 | 21.46525 | 0.005606 | 26.1  |
| 600343 | 2016 | -0.07 | 0.03 | 1.131657 | 1.2806466 | 21.81197 | 0.013658 | 28.78 |
| 600343 | 2016 | -0.04 | 0.03 | 1.131657 | 1.2806466 | 22.1946  | 0.013658 | 28.78 |
| 600248 | 2016 | -0.47 | 0.03 | 1.131657 | 1.2806466 | 22.41486 | 0.063746 | 53.03 |
| 300140 | 2016 | -0.35 | 0.03 | 1.131657 | 1.2806466 | 21.88195 | 0.070553 | 21.1  |
| 601179 | 2016 | -0.4  | 0.03 | 1.131657 | 1.2806466 | 24.26892 | 0.056428 | 51.29 |
| 600707 | 2016 | 0.613 | 0.03 | 1.131657 | 1.2806466 | 22.10065 | -0.21522 | 24.6  |
| 300164 | 2016 | -0.55 | 0.03 | 1.131657 | 1.2806466 | 21.26875 | 0.005606 | 26.1  |
| 600984 | 2016 | -0.49 | 0.03 | 1.131657 | 1.2806466 | 22.43243 | 0.025771 | 21.25 |
| 600343 | 2016 | 0.006 | 0.03 | 1.131657 | 1.2806466 | 22.1946  | 0.013658 | 28.78 |
| 601012 | 2016 | 0.639 | 0.03 | 1.131657 | 1.2806466 | 23.67674 | 0.153667 | 14.94 |
| 812    | 2016 | -0.81 | 0.03 | 1.131657 | 1.2806466 | 21.30862 | 0.050758 | 16.61 |
| 300140 | 2016 | -0.43 | 0.03 | 1.131657 | 1.2806466 | 21.88195 | 0.070553 | 21.1  |
| 601369 | 2016 | 0.24  | 0.03 | 1.131657 | 1.2806466 | 23.40753 | 0.035257 | 58.57 |
| 601369 | 2016 | 0.24  | 0.03 | 1.131657 | 1.2806466 | 23.40753 | 0.035257 | 58.57 |
| 600984 | 2016 | -0.39 | 0.03 | 1.131657 | 1.2806466 | 22.43243 | 0.025771 | 21.25 |

|        |      |       |      |          |           |          |          |       |
|--------|------|-------|------|----------|-----------|----------|----------|-------|
| 601179 | 2016 | -0.67 | 0.03 | 1.131657 | 1.2806466 | 24.26892 | 0.056428 | 51.29 |
| 600302 | 2016 | -0.6  | 0.03 | 1.131657 | 1.2806466 | 21.22069 | 0.047085 | 42.77 |
| 600302 | 2016 | -0.24 | 0.03 | 1.131657 | 1.2806466 | 21.22069 | 0.047085 | 42.77 |
| 2149   | 2016 | 0.592 | 0.03 | 1.131657 | 1.2806466 | 21.92556 | 0.021188 | 28.89 |
| 300164 | 2016 | -0.55 | 0.03 | 1.131657 | 1.2806466 | 21.46525 | 0.005606 | 26.1  |
| 601958 | 2016 | -0.38 | 0.03 | 1.131657 | 1.2806466 | 23.48797 | 0.005176 | 74.18 |
| 600984 | 2016 | -0.34 | 0.03 | 1.131657 | 1.2806466 | 22.43243 | 0.025771 | 21.25 |
| 601012 | 2016 | -0.02 | 0.03 | 1.131657 | 1.2806466 | 23.35525 | 0.153667 | 14.94 |
| 600984 | 2016 | -0.6  | 0.03 | 1.131657 | 1.2806466 | 22.43243 | 0.025771 | 21.25 |
| 601012 | 2016 | 0.639 | 0.03 | 1.131657 | 1.2806466 | 23.67674 | 0.153667 | 14.94 |
| 601179 | 2016 | -0.67 | 0.03 | 1.131657 | 1.2806466 | 24.26892 | 0.056428 | 51.29 |
| 600893 | 2016 | 0.028 | 0.03 | 1.131657 | 1.2806466 | 24.62211 | 0.048514 | 30.62 |
| 601179 | 2016 | -0.67 | 0.03 | 1.131657 | 1.2806466 | 24.26892 | 0.056428 | 51.29 |
| 600455 | 2016 | -0.08 | 0.03 | 1.131657 | 1.2806466 | 20.33201 | -0.04221 | 20.6  |
| 601958 | 2016 | -0.38 | 0.03 | 1.131657 | 1.2806466 | 23.37465 | 0.005176 | 74.18 |
| 600343 | 2016 | -0.04 | 0.03 | 1.131657 | 1.2806466 | 22.1946  | 0.013658 | 28.78 |
| 300140 | 2016 | -0.09 | 0.03 | 1.131657 | 1.2806466 | 21.88195 | 0.070553 | 21.1  |
| 601179 | 2016 | -0.67 | 0.03 | 1.131657 | 1.2806466 | 24.26892 | 0.056428 | 51.29 |
| 600248 | 2016 | -0.47 | 0.03 | 1.131657 | 1.2806466 | 20.89105 | 0.063746 | 53.03 |
| 300116 | 2016 | -0.72 | 0.03 | 1.131657 | 1.2806466 | 23.76309 | 0.054658 | 13.58 |
| 600343 | 2016 | -0.1  | 0.03 | 1.131657 | 1.2806466 | 22.1946  | 0.013658 | 28.78 |
| 300164 | 2016 | -0.55 | 0.03 | 1.131657 | 1.2806466 | 21.46525 | 0.005606 | 26.1  |
| 600984 | 2016 | -0.6  | 0.03 | 1.131657 | 1.2806466 | 22.43243 | 0.025771 | 21.25 |
| 601179 | 2016 | -0.43 | 0.03 | 1.131657 | 1.2806466 | 23.83216 | 0.056428 | 51.29 |
| 768    | 2016 | -0.1  | 0.03 | 1.131657 | 1.2806466 | 24.39237 | 0.025701 | 38.18 |
| 300140 | 2016 | -0.5  | 0.03 | 1.131657 | 1.2806466 | 20.96191 | 0.070553 | 21.1  |
| 2267   | 2016 | -0.94 | 0.03 | 1.131657 | 1.2806466 | 23.06097 | 0.093048 | 55.36 |
| 300116 | 2016 | -0.72 | 0.03 | 1.131657 | 1.2806466 | 23.76309 | 0.054658 | 13.58 |
| 300140 | 2016 | -0.13 | 0.03 | 1.131657 | 1.2806466 | 21.88195 | 0.070553 | 21.1  |
| 600984 | 2016 | -0.48 | 0.03 | 1.131657 | 1.2806466 | 22.43243 | 0.025771 | 21.25 |
| 601369 | 2016 | 0.24  | 0.03 | 1.131657 | 1.2806466 | 23.26734 | 0.035257 | 58.57 |
| 768    | 2016 | 0.033 | 0.03 | 1.131657 | 1.2806466 | 24.39237 | 0.025701 | 38.18 |
| 601179 | 2016 | -0.67 | 0.03 | 1.131657 | 1.2806466 | 24.26892 | 0.056428 | 51.29 |
| 2149   | 2016 | 0.648 | 0.03 | 1.131657 | 1.2806466 | 21.92556 | 0.021188 | 28.89 |
| 601179 | 2016 | -0.67 | 0.03 | 1.131657 | 1.2806466 | 24.26892 | 0.056428 | 51.29 |
| 300023 | 2016 | -0.14 | 0.03 | 1.131657 | 1.2806466 | 22.58228 | 0.069219 | 42.99 |
| 600302 | 2016 | -0.34 | 0.03 | 1.131657 | 1.2806466 | 21.02288 | 0.047085 | 42.77 |
| 601012 | 2016 | -0.44 | 0.03 | 1.131657 | 1.2806466 | 23.67674 | 0.153667 | 14.94 |
| 768    | 2016 | -0.06 | 0.03 | 1.131657 | 1.2806466 | 24.39237 | 0.025701 | 38.18 |
| 600893 | 2016 | -0.07 | 0.03 | 1.131657 | 1.2806466 | 24.62211 | 0.048514 | 30.62 |
| 2149   | 2016 | -0.07 | 0.03 | 1.131657 | 1.2806466 | 21.92556 | 0.021188 | 28.89 |
| 600893 | 2016 | -0.29 | 0.03 | 1.131657 | 1.2806466 | 24.62211 | 0.048514 | 30.62 |
| 601012 | 2016 | -0.54 | 0.03 | 1.131657 | 1.2806466 | 23.67674 | 0.153667 | 14.94 |
| 601179 | 2016 | -0.23 | 0.03 | 1.131657 | 1.2806466 | 24.26892 | 0.056428 | 51.29 |
| 600302 | 2016 | -0.24 | 0.03 | 1.131657 | 1.2806466 | 21.22069 | 0.047085 | 42.77 |
| 601012 | 2016 | -0.35 | 0.03 | 1.131657 | 1.2806466 | 23.67674 | 0.153667 | 14.94 |
| 600893 | 2016 | -0.44 | 0.03 | 1.131657 | 1.2806466 | 24.62211 | 0.048514 | 30.62 |
| 2267   | 2016 | -0.94 | 0.03 | 1.131657 | 1.2806466 | 23.06097 | 0.093048 | 55.36 |
| 600707 | 2016 | 0.629 | 0.03 | 1.131657 | 1.2806466 | 22.6493  | -0.21522 | 24.6  |
| 600893 | 2016 | 0.49  | 0.03 | 1.131657 | 1.2806466 | 24.62211 | 0.048514 | 30.62 |
| 601369 | 2016 | 0.24  | 0.03 | 1.131657 | 1.2806466 | 23.40753 | 0.035257 | 58.57 |
| 600984 | 2016 | -0.44 | 0.03 | 1.131657 | 1.2806466 | 22.43243 | 0.025771 | 21.25 |
| 300103 | 2016 | -0.48 | 0.03 | 1.131657 | 1.2806466 | 20.72101 | 0.027675 | 29.95 |
| 2267   | 2016 | -0.73 | 0.03 | 1.131657 | 1.2806466 | 23.06097 | 0.093048 | 55.36 |

|        |      |       |      |          |           |          |          |       |
|--------|------|-------|------|----------|-----------|----------|----------|-------|
| 812    | 2016 | -0.81 | 0.03 | 1.131657 | 1.2806466 | 20.64874 | 0.050758 | 16.61 |
| 600893 | 2016 | 0.016 | 0.03 | 1.131657 | 1.2806466 | 24.62211 | 0.048514 | 30.62 |
| 300023 | 2016 | -0.55 | 0.03 | 1.131657 | 1.2806466 | 22.58228 | 0.069219 | 42.99 |
| 300164 | 2016 | -0.55 | 0.03 | 1.131657 | 1.2806466 | 21.46525 | 0.005606 | 26.1  |
| 768    | 2016 | 0.033 | 0.03 | 1.131657 | 1.2806466 | 24.39237 | 0.025701 | 38.18 |
| 600707 | 2016 | 0.552 | 0.03 | 1.131657 | 1.2806466 | 22.6493  | -0.21522 | 24.6  |
| 300116 | 2016 | -0.72 | 0.03 | 1.131657 | 1.2806466 | 23.76309 | 0.054658 | 13.58 |
| 600893 | 2016 | -0.84 | 0.03 | 1.131657 | 1.2806466 | 24.62211 | 0.048514 | 30.62 |
| 600707 | 2016 | 0.629 | 0.03 | 1.131657 | 1.2806466 | 22.6493  | -0.21522 | 24.6  |
| 2267   | 2016 | -0.94 | 0.03 | 1.131657 | 1.2806466 | 23.06097 | 0.093048 | 55.36 |
| 600893 | 2016 | -0.2  | 0.03 | 1.131657 | 1.2806466 | 24.62211 | 0.048514 | 30.62 |
| 601012 | 2016 | -0.31 | 0.03 | 1.131657 | 1.2806466 | 23.67674 | 0.153667 | 14.94 |
| 300164 | 2016 | -0.55 | 0.03 | 1.131657 | 1.2806466 | 21.46525 | 0.005606 | 26.1  |
| 300164 | 2016 | -0.55 | 0.03 | 1.131657 | 1.2806466 | 21.46525 | 0.005606 | 26.1  |
| 300164 | 2016 | -0.22 | 0.03 | 1.131657 | 1.2806466 | 21.46525 | 0.005606 | 26.1  |
| 601012 | 2016 | -0.41 | 0.03 | 1.131657 | 1.2806466 | 23.67674 | 0.153667 | 14.94 |
| 300140 | 2016 | 0.16  | 0.03 | 1.131657 | 1.2806466 | 21.88195 | 0.070553 | 21.1  |
| 300116 | 2016 | -0.17 | 0.03 | 1.131657 | 1.2806466 | 23.76309 | 0.054658 | 13.58 |
| 300116 | 2016 | -0.17 | 0.03 | 1.131657 | 1.2806466 | 22.86885 | 0.054658 | 13.58 |
| 600893 | 2016 | 0.211 | 0.03 | 1.131657 | 1.2806466 | 24.62211 | 0.048514 | 30.62 |
| 601179 | 2016 | 0.347 | 0.03 | 1.131657 | 1.2806466 | 24.26892 | 0.056428 | 51.29 |
| 300397 | 2016 | 1.293 | 0.03 | 1.131657 | 1.2806466 | 21.21862 | -0.05225 | 39.9  |
| 600248 | 2016 | -0.47 | 0.03 | 1.131657 | 1.2806466 | 22.41486 | 0.063746 | 53.03 |
| 600080 | 2016 | -0.42 | 0.03 | 1.131657 | 1.2806466 | 21.09065 | 0.025897 | 15.72 |
| 600455 | 2016 | -0.08 | 0.03 | 1.131657 | 1.2806466 | 20.33201 | -0.04221 | 20.6  |
| 601012 | 2016 | -0.21 | 0.03 | 1.131657 | 1.2806466 | 23.67674 | 0.153667 | 14.94 |
| 2267   | 2016 | -0.84 | 0.03 | 1.131657 | 1.2806466 | 22.9735  | 0.093048 | 55.36 |
| 2149   | 2016 | 0.592 | 0.03 | 1.131657 | 1.2806466 | 21.92556 | 0.021188 | 28.89 |
| 812    | 2016 | -0.81 | 0.03 | 1.131657 | 1.2806466 | 21.30862 | 0.050758 | 16.61 |
| 600984 | 2016 | -0.48 | 0.03 | 1.131657 | 1.2806466 | 22.43243 | 0.025771 | 21.25 |
| 600893 | 2016 | -0.84 | 0.03 | 1.131657 | 1.2806466 | 24.62211 | 0.048514 | 30.62 |
| 600893 | 2016 | 0.211 | 0.03 | 1.131657 | 1.2806466 | 24.62211 | 0.048514 | 30.62 |
| 600893 | 2016 | -0.39 | 0.03 | 1.131657 | 1.2806466 | 24.62211 | 0.048514 | 30.62 |
| 300116 | 2016 | -0.17 | 0.03 | 1.131657 | 1.2806466 | 23.76309 | 0.054658 | 13.58 |
| 601012 | 2016 | -0.36 | 0.03 | 1.131657 | 1.2806466 | 23.67674 | 0.153667 | 14.94 |
| 600893 | 2016 | 0.211 | 0.03 | 1.131657 | 1.2806466 | 24.62211 | 0.048514 | 30.62 |
| 2267   | 2016 | -0.94 | 0.03 | 1.131657 | 1.2806466 | 23.06097 | 0.093048 | 55.36 |
| 600984 | 2016 | -0.6  | 0.03 | 1.131657 | 1.2806466 | 22.43243 | 0.025771 | 21.25 |
| 300397 | 2016 | 2.164 | 0.03 | 1.131657 | 1.2806466 | 21.21862 | -0.05225 | 39.9  |
| 601179 | 2016 | -0.23 | 0.03 | 1.131657 | 1.2806466 | 24.26892 | 0.056428 | 51.29 |
| 300140 | 2016 | -0.26 | 0.03 | 1.131657 | 1.2806466 | 21.88195 | 0.070553 | 21.1  |
| 600343 | 2016 | -0.25 | 0.03 | 1.131657 | 1.2806466 | 22.1946  | 0.013658 | 28.78 |
| 300397 | 2016 | 1.171 | 0.03 | 1.131657 | 1.2806466 | 21.21862 | -0.05225 | 39.9  |
| 600984 | 2016 | -0.6  | 0.03 | 1.131657 | 1.2806466 | 22.43243 | 0.025771 | 21.25 |
| 601179 | 2016 | -0.2  | 0.03 | 1.131657 | 1.2806466 | 24.26892 | 0.056428 | 51.29 |
| 601369 | 2016 | 0.24  | 0.03 | 1.131657 | 1.2806466 | 23.40753 | 0.035257 | 58.57 |
| 600984 | 2016 | 0.057 | 0.03 | 1.131657 | 1.2806466 | 22.43243 | 0.025771 | 21.25 |
| 600302 | 2016 | -0.42 | 0.03 | 1.131657 | 1.2806466 | 21.22069 | 0.047085 | 42.77 |
| 300023 | 2016 | -0.3  | 0.03 | 1.131657 | 1.2806466 | 22.58228 | 0.069219 | 42.99 |
| 2149   | 2016 | 0.42  | 0.03 | 1.131657 | 1.2806466 | 21.92556 | 0.021188 | 28.89 |
| 600248 | 2016 | -0.47 | 0.03 | 1.131657 | 1.2806466 | 22.41486 | 0.063746 | 53.03 |
| 600893 | 2016 | -0.05 | 0.03 | 1.131657 | 1.2806466 | 24.62211 | 0.048514 | 30.62 |
| 300116 | 2016 | -0.72 | 0.03 | 1.131657 | 1.2806466 | 23.76309 | 0.054658 | 13.58 |
| 300397 | 2016 | 1.373 | 0.03 | 1.131657 | 1.2806466 | 20.71291 | -0.05225 | 39.9  |

|        |      |       |      |          |            |          |          |       |
|--------|------|-------|------|----------|------------|----------|----------|-------|
| 2267   | 2016 | -0.73 | 0.03 | 1.131657 | 1.2806466  | 23.06097 | 0.093048 | 55.36 |
| 601179 | 2016 | 0.512 | 0.03 | 1.131657 | 1.2806466  | 24.26892 | 0.056428 | 51.29 |
| 600707 | 2016 | 0.609 | 0.03 | 1.131657 | 1.2806466  | 22.6493  | -0.21522 | 24.6  |
| 600984 | 2016 | -0.6  | 0.03 | 1.131657 | 1.2806466  | 22.43243 | 0.025771 | 21.25 |
| 600080 | 2016 | -0.42 | 0.03 | 1.131657 | 1.2806466  | 21.04978 | 0.025897 | 15.72 |
| 600080 | 2016 | -0.42 | 0.03 | 1.131657 | 1.2806466  | 21.09065 | 0.025897 | 15.72 |
| 2149   | 2016 | 0.923 | 0.03 | 1.131657 | 1.2806466  | 21.92556 | 0.021188 | 28.89 |
| 601012 | 2016 | 0.242 | 0.03 | 1.131657 | 1.2806466  | 23.67674 | 0.153667 | 14.94 |
| 601179 | 2016 | -0.1  | 0.03 | 1.131657 | 1.2806466  | 24.26892 | 0.056428 | 51.29 |
| 601958 | 2016 | -0.38 | 0.03 | 1.131657 | 1.2806466  | 23.48797 | 0.005176 | 74.18 |
| 300140 | 2016 | -0.21 | 0.03 | 1.131657 | 1.2806466  | 21.88195 | 0.070553 | 21.1  |
| 601179 | 2016 | -0.67 | 0.03 | 1.131657 | 1.2806466  | 24.26892 | 0.056428 | 51.29 |
| 300397 | 2016 | 1.391 | 0.03 | 1.131657 | 1.2806466  | 21.21862 | -0.05225 | 39.9  |
| 300397 | 2016 | 1.391 | 0.03 | 1.131657 | 1.2806466  | 20.71291 | -0.05225 | 39.9  |
| 600893 | 2016 | -0.39 | 0.03 | 1.131657 | 1.2806466  | 24.62211 | 0.048514 | 30.62 |
| 300103 | 2016 | -0.48 | 0.03 | 1.131657 | 1.2806466  | 20.72101 | 0.027675 | 29.95 |
| 768    | 2016 | -0.07 | 0.03 | 1.131657 | 1.2806466  | 24.2069  | 0.025701 | 38.18 |
| 300023 | 2016 | -0.55 | 0.03 | 1.131657 | 1.2806466  | 22.58228 | 0.069219 | 42.99 |
| 601179 | 2016 | -0.67 | 0.03 | 1.131657 | 1.2806466  | 24.26892 | 0.056428 | 51.29 |
| 600302 | 2016 | -0.3  | 0.03 | 1.131657 | 1.2806466  | 21.22069 | 0.047085 | 42.77 |
| 2267   | 2016 | -0.94 | 0.03 | 1.131657 | 1.2806466  | 23.06097 | 0.093048 | 55.36 |
| 600343 | 2016 | 0.101 | 0.03 | 1.131657 | 1.2806466  | 22.1946  | 0.013658 | 28.78 |
| 600984 | 2016 | -0.6  | 0.03 | 1.131657 | 1.2806466  | 22.43243 | 0.025771 | 21.25 |
| 300164 | 2016 | 0.336 | 0.03 | 1.131657 | 1.2806466  | 21.46525 | 0.005606 | 26.1  |
| 300023 | 2016 | -0.14 | 0.03 | 1.131657 | 1.2806466  | 20.79524 | 0.069219 | 42.99 |
| 600707 | 2016 | 0.482 | 0.03 | 1.131657 | 1.2806466  | 22.6493  | -0.21522 | 24.6  |
| 600707 | 2016 | 0.482 | 0.03 | 1.131657 | 1.2806466  | 22.6493  | -0.21522 | 24.6  |
| 601179 | 2016 | -0.43 | 0.03 | 1.131657 | 1.2806466  | 24.26892 | 0.056428 | 51.29 |
| 601179 | 2016 | 0.602 | 0.03 | 1.131657 | 1.2806466  | 24.26892 | 0.056428 | 51.29 |
| 812    | 2016 | -0.81 | 0.03 | 1.131657 | 1.2806466  | 21.30862 | 0.050758 | 16.61 |
| 600984 | 2016 | -0.6  | 0.03 | 1.131657 | 1.2806466  | 22.43243 | 0.025771 | 21.25 |
| 2149   | 2016 | 0.383 | 0.03 | 1.131657 | 1.2806466  | 21.92556 | 0.021188 | 28.89 |
| 2358   | 2016 | 0.028 | 0.03 | 0.982627 | 0.96555584 | 22.73521 | 0.069805 | 21.33 |
| 600439 | 2016 | -0.66 | 0.03 | 0.982627 | 0.96555584 | 22.17332 | 0.073542 | 31.34 |
| 400    | 2016 | 1.222 | 0.03 | 0.982627 | 0.96555584 | 23.38358 | 0.124559 | 41.28 |
| 600439 | 2016 | -0.66 | 0.03 | 0.982627 | 0.96555584 | 22.14448 | 0.073542 | 31.34 |
| 600172 | 2016 | -0.19 | 0.03 | 0.982627 | 0.96555584 | 22.87082 | 0.056246 | 22.59 |
| 400    | 2016 | 1.001 | 0.03 | 0.982627 | 0.96555584 | 23.38358 | 0.124559 | 41.28 |
| 400    | 2016 | 1.096 | 0.03 | 0.982627 | 0.96555584 | 23.38358 | 0.124559 | 41.28 |
| 400    | 2016 | 0.686 | 0.03 | 0.982627 | 0.96555584 | 23.38358 | 0.124559 | 41.28 |
| 400    | 2016 | 1.12  | 0.03 | 0.982627 | 0.96555584 | 23.38358 | 0.124559 | 41.28 |
| 400    | 2016 | 1.022 | 0.03 | 0.982627 | 0.96555584 | 23.38358 | 0.124559 | 41.28 |
| 400    | 2016 | 0.505 | 0.03 | 0.982627 | 0.96555584 | 23.38358 | 0.124559 | 41.28 |
| 600172 | 2016 | -0.19 | 0.03 | 0.982627 | 0.96555584 | 22.87082 | 0.056246 | 22.59 |
| 2358   | 2016 | 0.028 | 0.03 | 0.982627 | 0.96555584 | 22.73521 | 0.069805 | 21.33 |
| 2406   | 2016 | 0.101 | 0.03 | 0.982627 | 0.96555584 | 21.64825 | 0.052146 | 27.53 |
| 2406   | 2016 | -0.33 | 0.03 | 0.982627 | 0.96555584 | 21.64825 | 0.052146 | 27.53 |
| 2406   | 2016 | -0.27 | 0.03 | 0.982627 | 0.96555584 | 21.64825 | 0.052146 | 27.53 |
| 400    | 2016 | 0.706 | 0.03 | 0.982627 | 0.96555584 | 23.38358 | 0.124559 | 41.28 |
| 400    | 2016 | 0.779 | 0.03 | 0.982627 | 0.96555584 | 23.38358 | 0.124559 | 41.28 |
| 400    | 2016 | 1.222 | 0.03 | 0.982627 | 0.96555584 | 23.38358 | 0.124559 | 41.28 |
| 400    | 2016 | 0.556 | 0.03 | 0.982627 | 0.96555584 | 23.38358 | 0.124559 | 41.28 |
| 400    | 2016 | 0.577 | 0.03 | 0.982627 | 0.96555584 | 23.38358 | 0.124559 | 41.28 |
| 400    | 2016 | 0.654 | 0.03 | 0.982627 | 0.96555584 | 23.14319 | 0.124559 | 41.28 |

|        |      |       |      |          |            |          |          |       |
|--------|------|-------|------|----------|------------|----------|----------|-------|
| 2358   | 2016 | -0.32 | 0.03 | 0.982627 | 0.96555584 | 22.73521 | 0.069805 | 21.33 |
| 2406   | 2016 | -0.4  | 0.03 | 0.982627 | 0.96555584 | 21.64825 | 0.052146 | 27.53 |
| 600172 | 2016 | -0.25 | 0.03 | 0.982627 | 0.96555584 | 22.87082 | 0.056246 | 22.59 |
| 600439 | 2016 | -0.66 | 0.03 | 0.982627 | 0.96555584 | 22.17332 | 0.073542 | 31.34 |
| 2358   | 2016 | -0.2  | 0.03 | 0.982627 | 0.96555584 | 22.73521 | 0.069805 | 21.33 |
| 2406   | 2016 | -0.33 | 0.03 | 0.982627 | 0.96555584 | 21.64825 | 0.052146 | 27.53 |
| 400    | 2016 | 0.722 | 0.03 | 0.982627 | 0.96555584 | 23.38358 | 0.124559 | 41.28 |
| 2358   | 2016 | -0.03 | 0.03 | 0.982627 | 0.96555584 | 22.68445 | 0.069805 | 21.33 |
| 600172 | 2016 | -0.43 | 0.03 | 0.982627 | 0.96555584 | 22.87082 | 0.056246 | 22.59 |
| 600172 | 2016 | -0.43 | 0.03 | 0.982627 | 0.96555584 | 22.80032 | 0.056246 | 22.59 |
| 400    | 2016 | 0.779 | 0.03 | 0.982627 | 0.96555584 | 23.38358 | 0.124559 | 41.28 |
| 600172 | 2016 | -0.25 | 0.03 | 0.982627 | 0.96555584 | 22.87082 | 0.056246 | 22.59 |
| 2406   | 2016 | 0.101 | 0.03 | 0.982627 | 0.96555584 | 21.64825 | 0.052146 | 27.53 |
| 2406   | 2016 | 0.101 | 0.03 | 0.982627 | 0.96555584 | 21.64825 | 0.052146 | 27.53 |
| 600439 | 2016 | -0.66 | 0.03 | 0.982627 | 0.96555584 | 22.17332 | 0.073542 | 31.34 |
| 2406   | 2016 | -0.4  | 0.03 | 0.982627 | 0.96555584 | 21.62236 | 0.052146 | 27.53 |
| 2358   | 2016 | -0.03 | 0.03 | 0.982627 | 0.96555584 | 22.73521 | 0.069805 | 21.33 |
| 600439 | 2016 | -0.66 | 0.03 | 0.982627 | 0.96555584 | 22.17332 | 0.073542 | 31.34 |
| 600172 | 2016 | -0.27 | 0.03 | 0.982627 | 0.96555584 | 22.87082 | 0.056246 | 22.59 |
| 600439 | 2016 | -0.66 | 0.03 | 0.982627 | 0.96555584 | 22.17332 | 0.073542 | 31.34 |
| 833    | 2016 | -0.43 | 0.04 | 0.955103 | 0.91222155 | 21.95266 | 0.014717 | 31.31 |
| 833    | 2016 | 0.588 | 0.04 | 0.955103 | 0.91222155 | 21.76841 | 0.014717 | 31.31 |
| 833    | 2016 | 0.588 | 0.04 | 0.955103 | 0.91222155 | 21.95266 | 0.014717 | 31.31 |
| 833    | 2016 | -0.68 | 0.04 | 0.955103 | 0.91222155 | 21.95266 | 0.014717 | 31.31 |
| 833    | 2016 | -0.68 | 0.04 | 0.955103 | 0.91222155 | 21.95266 | 0.014717 | 31.31 |
| 851    | 2016 | 0.642 | 0.01 | 1.098612 | 1.206949   | 22.77194 | 0.037253 | 13.13 |
| 589    | 2016 | -0.55 | 0.01 | 1.098612 | 1.206949   | 23.06779 | 0.004125 | 25.33 |
| 733    | 2016 | -0.21 | 0.01 | 1.098612 | 1.206949   | 22.82525 | 0.046424 | 36.13 |
| 600523 | 2016 | -0.02 | 0.01 | 1.098612 | 1.206949   | 22.05311 | 0.082063 | 37.01 |
| 600765 | 2016 | 0.292 | 0.01 | 1.098612 | 1.206949   | 23.35856 | 0.055804 | 29.48 |
| 920    | 2016 | 0.11  | 0.01 | 1.098612 | 1.206949   | 21.30395 | 0.149484 | 42.64 |
| 733    | 2016 | -0.15 | 0.01 | 1.098612 | 1.206949   | 22.82525 | 0.046424 | 36.13 |
| 851    | 2016 | -0.03 | 0.01 | 1.098612 | 1.206949   | 22.77194 | 0.037253 | 13.13 |
| 733    | 2016 | -0.03 | 0.01 | 1.098612 | 1.206949   | 22.82525 | 0.046424 | 36.13 |
| 600594 | 2016 | 0.606 | 0.01 | 1.098612 | 1.206949   | 22.49013 | 0.092781 | 23.15 |
| 600523 | 2016 | -0.68 | 0.01 | 1.098612 | 1.206949   | 22.05311 | 0.082063 | 37.01 |
| 733    | 2016 | -0.21 | 0.01 | 1.098612 | 1.206949   | 22.82525 | 0.046424 | 36.13 |
| 600523 | 2016 | 0.646 | 0.01 | 1.098612 | 1.206949   | 22.05311 | 0.082063 | 37.01 |
| 600523 | 2016 | -0.24 | 0.01 | 1.098612 | 1.206949   | 22.05311 | 0.082063 | 37.01 |
| 600765 | 2016 | 0.222 | 0.01 | 1.098612 | 1.206949   | 23.35856 | 0.055804 | 29.48 |
| 733    | 2016 | -0.23 | 0.01 | 1.098612 | 1.206949   | 22.82525 | 0.046424 | 36.13 |
| 600594 | 2016 | 0.606 | 0.01 | 1.098612 | 1.206949   | 22.60866 | 0.092781 | 23.15 |
| 600765 | 2016 | 0.514 | 0.01 | 1.098612 | 1.206949   | 23.35856 | 0.055804 | 29.48 |
| 733    | 2016 | -0.19 | 0.01 | 1.098612 | 1.206949   | 22.82525 | 0.046424 | 36.13 |
| 851    | 2016 | 0.858 | 0.01 | 1.098612 | 1.206949   | 22.28458 | 0.037253 | 13.13 |
| 2037   | 2016 | -0.12 | 0.01 | 1.098612 | 1.206949   | 22.71242 | 0.03356  | 30    |
| 851    | 2016 | 0.858 | 0.01 | 1.098612 | 1.206949   | 22.77194 | 0.037253 | 13.13 |
| 733    | 2016 | -0.01 | 0.01 | 1.098612 | 1.206949   | 22.10177 | 0.046424 | 36.13 |
| 733    | 2016 | -0.19 | 0.01 | 1.098612 | 1.206949   | 22.82525 | 0.046424 | 36.13 |
| 851    | 2016 | 0.722 | 0.01 | 1.098612 | 1.206949   | 22.77194 | 0.037253 | 13.13 |
| 600594 | 2016 | -0.28 | 0.01 | 1.098612 | 1.206949   | 22.60866 | 0.092781 | 23.15 |
| 600594 | 2016 | 0.038 | 0.01 | 1.098612 | 1.206949   | 22.60866 | 0.092781 | 23.15 |
| 600523 | 2016 | -0.15 | 0.01 | 1.098612 | 1.206949   | 22.05311 | 0.082063 | 37.01 |
| 2025   | 2016 | 0.511 | 0.01 | 1.098612 | 1.206949   | 22.03567 | 0.112799 | 41.65 |

|        |      |       |      |          |          |          |          |       |
|--------|------|-------|------|----------|----------|----------|----------|-------|
| 2025   | 2016 | 0.866 | 0.01 | 1.098612 | 1.206949 | 22.03567 | 0.112799 | 41.65 |
| 2025   | 2016 | 0.635 | 0.01 | 1.098612 | 1.206949 | 22.03567 | 0.112799 | 41.65 |
| 600765 | 2016 | 0.222 | 0.01 | 1.098612 | 1.206949 | 23.35856 | 0.055804 | 29.48 |
| 2037   | 2016 | -0.36 | 0.01 | 1.098612 | 1.206949 | 22.71242 | 0.03356  | 30    |
| 2025   | 2016 | 0.373 | 0.01 | 1.098612 | 1.206949 | 22.03567 | 0.112799 | 41.65 |
| 300288 | 2016 | 0.839 | 0.01 | 1.098612 | 1.206949 | 21.03798 | 0.061384 | 36.25 |
| 600594 | 2016 | 0.606 | 0.01 | 1.098612 | 1.206949 | 22.60866 | 0.092781 | 23.15 |
| 733    | 2016 | -0.01 | 0.01 | 1.098612 | 1.206949 | 22.82525 | 0.046424 | 36.13 |
| 2025   | 2016 | 0.371 | 0.01 | 1.098612 | 1.206949 | 22.03567 | 0.112799 | 41.65 |
| 600765 | 2016 | 0.222 | 0.01 | 1.098612 | 1.206949 | 23.35856 | 0.055804 | 29.48 |
| 589    | 2016 | -0.55 | 0.01 | 1.098612 | 1.206949 | 23.06779 | 0.004125 | 25.33 |
| 733    | 2016 | -0.21 | 0.01 | 1.098612 | 1.206949 | 22.82525 | 0.046424 | 36.13 |
| 600594 | 2016 | -0.28 | 0.01 | 1.098612 | 1.206949 | 22.60866 | 0.092781 | 23.15 |
| 920    | 2016 | 0.11  | 0.01 | 1.098612 | 1.206949 | 21.30395 | 0.149484 | 42.64 |
| 600523 | 2016 | -0.16 | 0.01 | 1.098612 | 1.206949 | 22.05311 | 0.082063 | 37.01 |
| 851    | 2016 | -0.03 | 0.01 | 1.098612 | 1.206949 | 22.77194 | 0.037253 | 13.13 |
| 733    | 2016 | -0.21 | 0.01 | 1.098612 | 1.206949 | 22.82525 | 0.046424 | 36.13 |
| 600765 | 2016 | 0.33  | 0.01 | 1.098612 | 1.206949 | 23.35856 | 0.055804 | 29.48 |
| 600523 | 2016 | -0.68 | 0.01 | 1.098612 | 1.206949 | 21.54103 | 0.082063 | 37.01 |
| 851    | 2016 | 0.434 | 0.01 | 1.098612 | 1.206949 | 22.77194 | 0.037253 | 13.13 |
| 2025   | 2016 | 0.649 | 0.01 | 1.098612 | 1.206949 | 22.03567 | 0.112799 | 41.65 |
| 2025   | 2016 | 0.242 | 0.01 | 1.098612 | 1.206949 | 22.03567 | 0.112799 | 41.65 |
| 300288 | 2016 | 0.618 | 0.01 | 1.098612 | 1.206949 | 21.03798 | 0.061384 | 36.25 |
| 600523 | 2016 | -0.16 | 0.01 | 1.098612 | 1.206949 | 22.05311 | 0.082063 | 37.01 |
| 600227 | 2016 | 0.449 | 0.01 | 1.098612 | 1.206949 | 22.69222 | -0.08678 | 28.27 |
| 733    | 2016 | -0.21 | 0.01 | 1.098612 | 1.206949 | 22.82525 | 0.046424 | 36.13 |
| 600227 | 2016 | 0.449 | 0.01 | 1.098612 | 1.206949 | 22.69222 | -0.08678 | 28.27 |
| 600227 | 2016 | -0.43 | 0.01 | 1.098612 | 1.206949 | 22.6119  | -0.08678 | 28.27 |
| 600765 | 2016 | 0.222 | 0.01 | 1.098612 | 1.206949 | 23.35856 | 0.055804 | 29.48 |
| 600523 | 2016 | 0.057 | 0.01 | 1.098612 | 1.206949 | 22.05311 | 0.082063 | 37.01 |
| 600765 | 2016 | 0.467 | 0.01 | 1.098612 | 1.206949 | 23.35856 | 0.055804 | 29.48 |
| 600523 | 2016 | -0.24 | 0.01 | 1.098612 | 1.206949 | 22.05311 | 0.082063 | 37.01 |
| 2025   | 2016 | 0.369 | 0.01 | 1.098612 | 1.206949 | 22.03567 | 0.112799 | 41.65 |
| 600523 | 2016 | -0.16 | 0.01 | 1.098612 | 1.206949 | 22.05311 | 0.082063 | 37.01 |
| 300288 | 2016 | 0.751 | 0.01 | 1.098612 | 1.206949 | 21.03798 | 0.061384 | 36.25 |
| 600765 | 2016 | 0.222 | 0.01 | 1.098612 | 1.206949 | 23.35856 | 0.055804 | 29.48 |
| 589    | 2016 | -0.55 | 0.01 | 1.098612 | 1.206949 | 23.06779 | 0.004125 | 25.33 |
| 2037   | 2016 | -0.36 | 0.01 | 1.098612 | 1.206949 | 21.87097 | 0.03356  | 30    |
| 733    | 2016 | -0.4  | 0.01 | 1.098612 | 1.206949 | 22.82525 | 0.046424 | 36.13 |
| 600594 | 2016 | 0.606 | 0.01 | 1.098612 | 1.206949 | 22.60866 | 0.092781 | 23.15 |
| 600523 | 2016 | -0.27 | 0.01 | 1.098612 | 1.206949 | 22.05311 | 0.082063 | 37.01 |
| 300288 | 2016 | 1.247 | 0.01 | 1.098612 | 1.206949 | 21.03798 | 0.061384 | 36.25 |
| 300288 | 2016 | 1.247 | 0.01 | 1.098612 | 1.206949 | 20.9233  | 0.061384 | 36.25 |
| 920    | 2016 | 0.11  | 0.01 | 1.098612 | 1.206949 | 21.30395 | 0.149484 | 42.64 |
| 600227 | 2016 | -0.43 | 0.01 | 1.098612 | 1.206949 | 22.69222 | -0.08678 | 28.27 |
| 2025   | 2016 | 0.373 | 0.01 | 1.098612 | 1.206949 | 22.03567 | 0.112799 | 41.65 |
| 600765 | 2016 | -0.63 | 0.01 | 1.098612 | 1.206949 | 22.1809  | 0.055804 | 29.48 |
| 600765 | 2016 | -0.04 | 0.01 | 1.098612 | 1.206949 | 23.35856 | 0.055804 | 29.48 |
| 2037   | 2016 | -0.36 | 0.01 | 1.098612 | 1.206949 | 22.71242 | 0.03356  | 30    |
| 600765 | 2016 | 0.222 | 0.01 | 1.098612 | 1.206949 | 23.35856 | 0.055804 | 29.48 |
| 733    | 2016 | -0.21 | 0.01 | 1.098612 | 1.206949 | 22.82525 | 0.046424 | 36.13 |
| 2037   | 2016 | 0.069 | 0.01 | 1.098612 | 1.206949 | 22.71242 | 0.03356  | 30    |
| 600765 | 2016 | 0.222 | 0.01 | 1.098612 | 1.206949 | 23.35856 | 0.055804 | 29.48 |
| 600227 | 2016 | -0.35 | 0.01 | 1.098612 | 1.206949 | 22.69222 | -0.08678 | 28.27 |



|        |      |       |      |          |            |          |          |       |
|--------|------|-------|------|----------|------------|----------|----------|-------|
| 2025   | 2016 | 0.371 | 0.01 | 1.098612 | 1.206949   | 21.68737 | 0.112799 | 41.65 |
| 2025   | 2016 | 0.628 | 0.01 | 1.098612 | 1.206949   | 22.03567 | 0.112799 | 41.65 |
| 920    | 2016 | 0.11  | 0.01 | 1.098612 | 1.206949   | 21.30395 | 0.149484 | 42.64 |
| 600523 | 2016 | -0.09 | 0.01 | 1.098612 | 1.206949   | 22.05311 | 0.082063 | 37.01 |
| 600227 | 2016 | 0.449 | 0.01 | 1.098612 | 1.206949   | 22.69222 | -0.08678 | 28.27 |
| 589    | 2016 | -0.55 | 0.01 | 1.098612 | 1.206949   | 23.03766 | 0.004125 | 25.33 |
| 300288 | 2016 | 1.19  | 0.01 | 1.098612 | 1.206949   | 21.03798 | 0.061384 | 36.25 |
| 600523 | 2016 | -0.16 | 0.01 | 1.098612 | 1.206949   | 22.05311 | 0.082063 | 37.01 |
| 920    | 2016 | 0.137 | 0.01 | 1.098612 | 1.206949   | 21.24042 | 0.149484 | 42.64 |
| 600765 | 2016 | -0.63 | 0.01 | 1.098612 | 1.206949   | 23.35856 | 0.055804 | 29.48 |
| 600765 | 2016 | 0.222 | 0.01 | 1.098612 | 1.206949   | 23.35856 | 0.055804 | 29.48 |
| 920    | 2016 | 0.08  | 0.01 | 1.098612 | 1.206949   | 21.30395 | 0.149484 | 42.64 |
| 733    | 2016 | -0.21 | 0.01 | 1.098612 | 1.206949   | 22.82525 | 0.046424 | 36.13 |
| 600523 | 2016 | -0.17 | 0.01 | 1.098612 | 1.206949   | 22.05311 | 0.082063 | 37.01 |
| 733    | 2016 | -0.21 | 0.01 | 1.098612 | 1.206949   | 22.82525 | 0.046424 | 36.13 |
| 2025   | 2016 | 0.703 | 0.01 | 1.098612 | 1.206949   | 22.03567 | 0.112799 | 41.65 |
| 600523 | 2016 | -0.16 | 0.01 | 1.098612 | 1.206949   | 22.05311 | 0.082063 | 37.01 |
| 2037   | 2016 | 0.069 | 0.01 | 1.098612 | 1.206949   | 22.71242 | 0.03356  | 30    |
| 589    | 2016 | -0.55 | 0.01 | 1.098612 | 1.206949   | 23.06779 | 0.004125 | 25.33 |
| 2037   | 2016 | -0.36 | 0.01 | 1.098612 | 1.206949   | 22.71242 | 0.03356  | 30    |
| 733    | 2016 | -0.21 | 0.01 | 1.098612 | 1.206949   | 22.82525 | 0.046424 | 36.13 |
| 600228 | 2016 | 0.583 | 0.02 | 0.207639 | 0.04311403 | 20.10336 | -0.4227  | 18.22 |
| 829    | 2016 | -0.36 | 0.02 | 0.207639 | 0.04311403 | 23.1905  | 0.102882 | 13.76 |
| 600228 | 2016 | 0.583 | 0.02 | 0.207639 | 0.04311403 | 20.10336 | -0.4227  | 18.22 |
| 829    | 2016 | -0.48 | 0.02 | 0.207639 | 0.04311403 | 23.1905  | 0.102882 | 13.76 |
| 600228 | 2016 | 0.583 | 0.02 | 0.207639 | 0.04311403 | 20.10336 | -0.4227  | 18.22 |
| 2378   | 2016 | 0.583 | 0.02 | 0.207639 | 0.04311403 | 21.92091 | 0.024219 | 70.53 |
| 2378   | 2016 | 0.191 | 0.02 | 0.207639 | 0.04311403 | 22.02283 | 0.024219 | 70.53 |
| 2378   | 2016 | 0.583 | 0.02 | 0.207639 | 0.04311403 | 21.92091 | 0.024219 | 70.53 |
| 2378   | 2016 | 0.583 | 0.02 | 0.207639 | 0.04311403 | 21.92091 | 0.024219 | 70.53 |
| 2378   | 2016 | 0.085 | 0.02 | 0.207639 | 0.04311403 | 21.92091 | 0.024219 | 70.53 |
| 829    | 2016 | -0.36 | 0.02 | 0.207639 | 0.04311403 | 23.1905  | 0.102882 | 13.76 |
| 600228 | 2016 | 0.583 | 0.02 | 0.207639 | 0.04311403 | 20.10336 | -0.4227  | 18.22 |
| 829    | 2016 | -0.26 | 0.02 | 0.207639 | 0.04311403 | 21.42577 | 0.102882 | 13.76 |
| 2378   | 2016 | 0.583 | 0.02 | 0.207639 | 0.04311403 | 21.92091 | 0.024219 | 70.53 |
| 2378   | 2016 | 0.085 | 0.02 | 0.207639 | 0.04311403 | 21.92091 | 0.024219 | 70.53 |
| 600228 | 2016 | 0.583 | 0.02 | 0.207639 | 0.04311403 | 20.10336 | -0.4227  | 18.22 |
| 600988 | 2016 | -0.56 | 0.01 | 1.527981 | 2.3347245  | 22.05579 | 0.135486 | 30.27 |
| 600988 | 2016 | -0.56 | 0.01 | 1.527981 | 2.3347245  | 22.05579 | 0.135486 | 30.27 |
| 600988 | 2016 | -0.56 | 0.01 | 1.527981 | 2.3347245  | 22.05579 | 0.135486 | 30.27 |
| 600988 | 2016 | -0.56 | 0.01 | 1.527981 | 2.3347245  | 22.05579 | 0.135486 | 30.27 |
| 600988 | 2016 | -0.56 | 0.01 | 1.527981 | 2.3347245  | 21.76101 | 0.135486 | 30.27 |
| 2501   | 2016 | -0.53 | 0.1  | 0.0066   | 0.00004356 | 23.21561 | 0.12053  | 18.49 |
| 2501   | 2016 | -0.55 | 0.1  | 0.0066   | 0.00004356 | 23.21561 | 0.12053  | 18.49 |
| 2501   | 2016 | -0.53 | 0.1  | 0.0066   | 0.00004356 | 23.21561 | 0.12053  | 18.49 |
| 2501   | 2016 | -0.53 | 0.1  | 0.0066   | 0.00004356 | 23.16258 | 0.12053  | 18.49 |
| 2501   | 2016 | -0.55 | 0.1  | 0.0066   | 0.00004356 | 23.21561 | 0.12053  | 18.49 |
| 2501   | 2016 | -0.54 | 0.1  | 0.0066   | 0.00004356 | 23.21561 | 0.12053  | 18.49 |
| 300405 | 2016 | 0.673 | 0    | 0.096004 | 0.00921669 | 21.24079 | 0.016941 | 43.46 |
| 300082 | 2016 | -0.59 | 0    | 0.096004 | 0.00921669 | 22.39514 | 0.015177 | 56.18 |
| 300082 | 2016 | 0.736 | 0    | 0.096004 | 0.00921669 | 22.39514 | 0.015177 | 56.18 |
| 300082 | 2016 | 0.736 | 0    | 0.096004 | 0.00921669 | 21.74552 | 0.015177 | 56.18 |
| 300082 | 2016 | -0.59 | 0    | 0.096004 | 0.00921669 | 22.39514 | 0.015177 | 56.18 |
| 300405 | 2016 | 0.673 | 0    | 0.096004 | 0.00921669 | 21.15135 | 0.016941 | 43.46 |

|        |      |       |      |          |            |          |          |       |
|--------|------|-------|------|----------|------------|----------|----------|-------|
| 300082 | 2016 | 0.736 | 0    | 0.096004 | 0.00921669 | 22.39514 | 0.015177 | 56.18 |
| 300405 | 2016 | -0.07 | 0    | 0.096004 | 0.00921669 | 21.24079 | 0.016941 | 43.46 |
| 300082 | 2016 | 0.105 | 0    | 0.096004 | 0.00921669 | 22.39514 | 0.015177 | 56.18 |
| 300405 | 2016 | 0.673 | 0    | 0.096004 | 0.00921669 | 21.24079 | 0.016941 | 43.46 |
| 300082 | 2016 | -0.02 | 0    | 0.096004 | 0.00921669 | 22.39514 | 0.015177 | 56.18 |
| 300082 | 2016 | 0.736 | 0    | 0.096004 | 0.00921669 | 22.39514 | 0.015177 | 56.18 |
| 300082 | 2016 | -0.59 | 0    | 0.096004 | 0.00921669 | 22.39514 | 0.015177 | 56.18 |
| 300405 | 2016 | -0.32 | 0    | 0.096004 | 0.00921669 | 21.24079 | 0.016941 | 43.46 |
| 300405 | 2016 | -0.32 | 0    | 0.096004 | 0.00921669 | 21.24079 | 0.016941 | 43.46 |
| 300082 | 2016 | -0.23 | 0    | 0.096004 | 0.00921669 | 22.39514 | 0.015177 | 56.18 |
| 600351 | 2016 | -0.04 | 0    | 1.860227 | 3.4604438  | 22.15966 | 0.009904 | 24.77 |
| 2753   | 2016 | 0.004 | 0    | 1.860227 | 3.4604438  | 20.79854 | 0.086377 | 29.13 |
| 600351 | 2016 | -0.16 | 0    | 1.860227 | 3.4604438  | 22.15966 | 0.009904 | 24.77 |
| 831    | 2016 | -0.69 | 0    | 1.860227 | 3.4604438  | 21.50205 | 0.008273 | 23.98 |
| 831    | 2016 | -0.72 | 0    | 1.860227 | 3.4604438  | 21.50205 | 0.008273 | 23.98 |
| 737    | 2016 | -0.88 | 0    | 1.860227 | 3.4604438  | 21.75163 | 0.128493 | 25.69 |
| 600351 | 2016 | -0.16 | 0    | 1.860227 | 3.4604438  | 22.15966 | 0.009904 | 24.77 |
| 2753   | 2016 | 0.004 | 0    | 1.860227 | 3.4604438  | 20.79854 | 0.086377 | 29.13 |
| 831    | 2016 | -0.67 | 0    | 1.860227 | 3.4604438  | 21.50205 | 0.008273 | 23.98 |
| 600351 | 2016 | -0.16 | 0    | 1.860227 | 3.4604438  | 22.15966 | 0.009904 | 24.77 |
| 600351 | 2016 | -0.16 | 0    | 1.860227 | 3.4604438  | 22.15966 | 0.009904 | 24.77 |
| 737    | 2016 | -0.47 | 0    | 1.860227 | 3.4604438  | 21.75163 | 0.128493 | 25.69 |
| 737    | 2016 | -0.88 | 0    | 1.860227 | 3.4604438  | 21.58247 | 0.128493 | 25.69 |
| 600351 | 2016 | -0.16 | 0    | 1.860227 | 3.4604438  | 22.07674 | 0.009904 | 24.77 |
| 831    | 2016 | -0.69 | 0    | 1.860227 | 3.4604438  | 21.50205 | 0.008273 | 23.98 |
| 737    | 2016 | -0.62 | 0    | 1.860227 | 3.4604438  | 21.75163 | 0.128493 | 25.69 |
| 600351 | 2016 | 0.502 | 0    | 1.860227 | 3.4604438  | 22.15966 | 0.009904 | 24.77 |
| 737    | 2016 | -0.88 | 0    | 1.860227 | 3.4604438  | 21.75163 | 0.128493 | 25.69 |
| 831    | 2016 | -0.72 | 0    | 1.860227 | 3.4604438  | 21.93864 | 0.008273 | 23.98 |
| 600351 | 2016 | -0.16 | 0    | 1.860227 | 3.4604438  | 22.15966 | 0.009904 | 24.77 |
| 737    | 2016 | -0.88 | 0    | 1.860227 | 3.4604438  | 21.75163 | 0.128493 | 25.69 |
| 737    | 2016 | -0.88 | 0    | 1.860227 | 3.4604438  | 21.75163 | 0.128493 | 25.69 |
| 831    | 2016 | -0.72 | 0    | 1.860227 | 3.4604438  | 21.50205 | 0.008273 | 23.98 |
| 600351 | 2016 | -0.44 | 0    | 1.860227 | 3.4604438  | 22.15966 | 0.009904 | 24.77 |
| 737    | 2016 | -0.47 | 0    | 1.860227 | 3.4604438  | 21.75163 | 0.128493 | 25.69 |
| 2753   | 2016 | 0.004 | 0    | 1.860227 | 3.4604438  | 20.79854 | 0.086377 | 29.13 |
| 600351 | 2016 | 0.384 | 0    | 1.860227 | 3.4604438  | 22.15966 | 0.009904 | 24.77 |
| 603688 | 2016 | 0.009 | 0.01 | 1.348278 | 1.8178537  | 20.96508 | 0.067507 | 29.34 |
| 603688 | 2016 | 0.009 | 0.01 | 1.348278 | 1.8178537  | 20.96508 | 0.067507 | 29.34 |
| 603366 | 2016 | -0.41 | 0.01 | 1.348278 | 1.8178537  | 22.37604 | 0.064507 | 57.75 |
| 603688 | 2016 | 0.009 | 0.01 | 1.348278 | 1.8178537  | 20.94773 | 0.067507 | 29.34 |
| 600557 | 2016 | 1.045 | 0.01 | 1.348278 | 1.8178537  | 22.27721 | 0.117332 | 27.48 |
| 600557 | 2016 | 0.895 | 0.01 | 1.348278 | 1.8178537  | 22.21232 | 0.117332 | 27.48 |
| 600276 | 2016 | 1.154 | 0.01 | 1.348278 | 1.8178537  | 23.38563 | 0.204607 | 24.31 |
| 603366 | 2016 | -0.47 | 0.01 | 1.348278 | 1.8178537  | 22.37604 | 0.064507 | 57.75 |
| 603366 | 2016 | -0.42 | 0.01 | 1.348278 | 1.8178537  | 22.40308 | 0.064507 | 57.75 |
| 603366 | 2016 | -0.45 | 0.01 | 1.348278 | 1.8178537  | 22.37604 | 0.064507 | 57.75 |
| 600557 | 2016 | -0.27 | 0.01 | 1.348278 | 1.8178537  | 22.27721 | 0.117332 | 27.48 |
| 603366 | 2016 | -0.47 | 0.01 | 1.348278 | 1.8178537  | 22.37604 | 0.064507 | 57.75 |
| 600557 | 2016 | -0.27 | 0.01 | 1.348278 | 1.8178537  | 22.27721 | 0.117332 | 27.48 |
| 603688 | 2016 | 0.009 | 0.01 | 1.348278 | 1.8178537  | 20.96508 | 0.067507 | 29.34 |
| 603688 | 2016 | 0.009 | 0.01 | 1.348278 | 1.8178537  | 20.96508 | 0.067507 | 29.34 |
| 600276 | 2016 | 1.154 | 0.01 | 1.348278 | 1.8178537  | 23.38563 | 0.204607 | 24.31 |
| 603366 | 2016 | -0.36 | 0.01 | 1.348278 | 1.8178537  | 22.37604 | 0.064507 | 57.75 |

|        |      |       |      |          |            |          |          |       |
|--------|------|-------|------|----------|------------|----------|----------|-------|
| 603366 | 2016 | -0.36 | 0.01 | 1.348278 | 1.8178537  | 22.37604 | 0.064507 | 57.75 |
| 603366 | 2016 | -0.63 | 0.01 | 1.348278 | 1.8178537  | 22.37604 | 0.064507 | 57.75 |
| 603366 | 2016 | -0.63 | 0.01 | 1.348278 | 1.8178537  | 22.37604 | 0.064507 | 57.75 |
| 600276 | 2016 | 1.09  | 0.01 | 1.348278 | 1.8178537  | 23.38563 | 0.204607 | 24.31 |
| 600557 | 2016 | 1.045 | 0.01 | 1.348278 | 1.8178537  | 22.27721 | 0.117332 | 27.48 |
| 603688 | 2016 | 0.009 | 0.01 | 1.348278 | 1.8178537  | 20.96508 | 0.067507 | 29.34 |
| 603688 | 2016 | 0.009 | 0.01 | 1.348278 | 1.8178537  | 20.96508 | 0.067507 | 29.34 |
| 600276 | 2016 | 1.09  | 0.01 | 1.348278 | 1.8178537  | 23.38563 | 0.204607 | 24.31 |
| 603366 | 2016 | -0.63 | 0.01 | 1.348278 | 1.8178537  | 22.37604 | 0.064507 | 57.75 |
| 600276 | 2016 | 1.154 | 0.01 | 1.348278 | 1.8178537  | 23.24055 | 0.204607 | 24.31 |
| 603366 | 2016 | -0.36 | 0.01 | 1.348278 | 1.8178537  | 22.37604 | 0.064507 | 57.75 |
| 603366 | 2016 | -0.63 | 0.01 | 1.348278 | 1.8178537  | 22.37604 | 0.064507 | 57.75 |
| 600276 | 2016 | 1.109 | 0.01 | 1.348278 | 1.8178537  | 23.38563 | 0.204607 | 24.31 |
| 600276 | 2016 | 1.154 | 0.01 | 1.348278 | 1.8178537  | 23.38563 | 0.204607 | 24.31 |
| 603366 | 2016 | -0.63 | 0.01 | 1.348278 | 1.8178537  | 22.37604 | 0.064507 | 57.75 |
| 603366 | 2016 | -0.36 | 0.01 | 1.348278 | 1.8178537  | 22.37604 | 0.064507 | 57.75 |
| 810    | 2016 | 0.324 | 0.01 | 0.207639 | 0.04311403 | 22.60752 | 0.193729 | 56.5  |
| 810    | 2016 | 0.863 | 0.01 | 0.207639 | 0.04311403 | 22.60752 | 0.193729 | 56.5  |
| 731    | 2016 | -0.27 | 0.01 | 0.207639 | 0.04311403 | 22.27973 | -0.102   | 12.18 |
| 731    | 2016 | -0.93 | 0.01 | 0.207639 | 0.04311403 | 22.10197 | -0.102   | 12.18 |
| 810    | 2016 | 0.068 | 0.01 | 0.207639 | 0.04311403 | 22.60752 | 0.193729 | 56.5  |
| 731    | 2016 | -0.93 | 0.01 | 0.207639 | 0.04311403 | 22.27973 | -0.102   | 12.18 |
| 2466   | 2016 | 0.264 | 0.01 | 0.207639 | 0.04311403 | 23.13971 | 0.302158 | 35.81 |
| 731    | 2016 | 0.395 | 0.01 | 0.207639 | 0.04311403 | 22.27973 | -0.102   | 12.18 |
| 2466   | 2016 | 0.402 | 0.01 | 0.207639 | 0.04311403 | 22.47445 | 0.302158 | 35.81 |
| 600702 | 2016 | -0.28 | 0.01 | 0.207639 | 0.04311403 | 22.1008  | 0.034489 | 29.85 |
| 2466   | 2016 | 0.292 | 0.01 | 0.207639 | 0.04311403 | 23.13971 | 0.302158 | 35.81 |
| 600702 | 2016 | -0.28 | 0.01 | 0.207639 | 0.04311403 | 22.1008  | 0.034489 | 29.85 |
| 600702 | 2016 | -0.28 | 0.01 | 0.207639 | 0.04311403 | 22.1008  | 0.034489 | 29.85 |
| 600702 | 2016 | -0.28 | 0.01 | 0.207639 | 0.04311403 | 22.1008  | 0.034489 | 29.85 |
| 600702 | 2016 | -0.28 | 0.01 | 0.207639 | 0.04311403 | 22.1008  | 0.034489 | 29.85 |
| 2466   | 2016 | 0.292 | 0.01 | 0.207639 | 0.04311403 | 23.13971 | 0.302158 | 35.81 |
| 600702 | 2016 | -0.28 | 0.01 | 0.207639 | 0.04311403 | 22.02097 | 0.034489 | 29.85 |
| 731    | 2016 | 0.395 | 0.01 | 0.207639 | 0.04311403 | 22.27973 | -0.102   | 12.18 |
| 810    | 2016 | 0.274 | 0.01 | 0.207639 | 0.04311403 | 22.60752 | 0.193729 | 56.5  |
| 2466   | 2016 | 0.264 | 0.01 | 0.207639 | 0.04311403 | 23.13971 | 0.302158 | 35.81 |
| 2466   | 2016 | 0.264 | 0.01 | 0.207639 | 0.04311403 | 23.13971 | 0.302158 | 35.81 |
| 600702 | 2016 | -0.28 | 0.01 | 0.207639 | 0.04311403 | 22.1008  | 0.034489 | 29.85 |
| 810    | 2016 | 0.274 | 0.01 | 0.207639 | 0.04311403 | 22.12318 | 0.193729 | 56.5  |
| 810    | 2016 | 0.274 | 0.01 | 0.207639 | 0.04311403 | 22.60752 | 0.193729 | 56.5  |
| 2466   | 2016 | 0.264 | 0.01 | 0.207639 | 0.04311403 | 23.13971 | 0.302158 | 35.81 |
| 810    | 2016 | 0.324 | 0.01 | 0.207639 | 0.04311403 | 22.60752 | 0.193729 | 56.5  |
| 810    | 2016 | -0.02 | 0.01 | 0.207639 | 0.04311403 | 22.60752 | 0.193729 | 56.5  |
| 600112 | 2016 | -0.18 | 0.01 | 1.435448 | 2.0605104  | 21.70662 | -0.08596 | 18.34 |
| 600112 | 2016 | -0.22 | 0.01 | 1.435448 | 2.0605104  | 21.70662 | -0.08596 | 18.34 |
| 600112 | 2016 | -0.05 | 0.01 | 1.435448 | 2.0605104  | 21.35319 | -0.08596 | 18.34 |
| 600112 | 2016 | -0.5  | 0.01 | 1.435448 | 2.0605104  | 21.70662 | -0.08596 | 18.34 |
| 600519 | 2016 | -0.11 | 0.01 | 1.435448 | 2.0605104  | 24.81194 | 0.236245 | 61.99 |
| 600112 | 2016 | -0.07 | 0.01 | 1.435448 | 2.0605104  | 21.70662 | -0.08596 | 18.34 |
| 600992 | 2016 | 0.698 | 0.01 | 1.435448 | 2.0605104  | 21.50198 | 0.015474 | 23.45 |
| 600519 | 2016 | -0.11 | 0.01 | 1.435448 | 2.0605104  | 25.45007 | 0.236245 | 61.99 |
| 600519 | 2016 | -0.11 | 0.01 | 1.435448 | 2.0605104  | 25.45007 | 0.236245 | 61.99 |
| 600112 | 2016 | -0.05 | 0.01 | 1.435448 | 2.0605104  | 21.70662 | -0.08596 | 18.34 |
| 600112 | 2016 | -0.19 | 0.01 | 1.435448 | 2.0605104  | 21.70662 | -0.08596 | 18.34 |

|        |      |       |      |          |           |          |          |       |
|--------|------|-------|------|----------|-----------|----------|----------|-------|
| 600992 | 2016 | 0.698 | 0.01 | 1.435448 | 2.0605104 | 21.50198 | 0.015474 | 23.45 |
| 600992 | 2016 | 0.698 | 0.01 | 1.435448 | 2.0605104 | 21.50198 | 0.015474 | 23.45 |
| 600112 | 2016 | -0.07 | 0.01 | 1.435448 | 2.0605104 | 21.70662 | -0.08596 | 18.34 |
| 2442   | 2016 | -0.48 | 0    | 1.361656 | 1.8541072 | 21.46587 | 0.027772 | 27.19 |
| 937    | 2016 | 0.419 | 0    | 1.361656 | 1.8541072 | 24.49641 | 0.007953 | 44.12 |
| 937    | 2016 | 0.419 | 0    | 1.361656 | 1.8541072 | 24.49641 | 0.007953 | 44.12 |
| 937    | 2016 | 0.419 | 0    | 1.361656 | 1.8541072 | 24.49641 | 0.007953 | 44.12 |
| 2442   | 2016 | -0.48 | 0    | 1.361656 | 1.8541072 | 21.68407 | 0.027772 | 27.19 |
| 937    | 2016 | 0.419 | 0    | 1.361656 | 1.8541072 | 24.36863 | 0.007953 | 44.12 |
| 2442   | 2016 | -0.48 | 0    | 1.361656 | 1.8541072 | 21.68407 | 0.027772 | 27.19 |
| 2442   | 2016 | -0.48 | 0    | 1.361656 | 1.8541072 | 21.68407 | 0.027772 | 27.19 |
| 937    | 2016 | 0.419 | 0    | 1.361656 | 1.8541072 | 24.49641 | 0.007953 | 44.12 |
| 2442   | 2016 | -0.48 | 0    | 1.361656 | 1.8541072 | 21.68407 | 0.027772 | 27.19 |
| 937    | 2016 | 0.419 | 0    | 1.361656 | 1.8541072 | 24.49641 | 0.007953 | 44.12 |
| 300138 | 2016 | -0.03 | 0    | 1.365691 | 1.8651121 | 21.63651 | 0.065506 | 18.58 |
| 300138 | 2016 | -0.03 | 0    | 1.365691 | 1.8651121 | 21.63651 | 0.065506 | 18.58 |
| 778    | 2016 | -0.6  | 0    | 1.365691 | 1.8651121 | 24.62062 | 0.024417 | 45.38 |
| 300138 | 2016 | 0.193 | 0    | 1.365691 | 1.8651121 | 21.63651 | 0.065506 | 18.58 |
| 300138 | 2016 | 0.484 | 0    | 1.365691 | 1.8651121 | 21.63651 | 0.065506 | 18.58 |
| 778    | 2016 | -0.43 | 0    | 1.365691 | 1.8651121 | 24.62062 | 0.024417 | 45.38 |
| 778    | 2016 | -0.09 | 0    | 1.365691 | 1.8651121 | 24.62062 | 0.024417 | 45.38 |
| 778    | 2016 | -0.53 | 0    | 1.365691 | 1.8651121 | 24.62062 | 0.024417 | 45.38 |
| 778    | 2016 | -0.73 | 0    | 1.365691 | 1.8651121 | 24.62062 | 0.024417 | 45.38 |
| 300138 | 2016 | 0.484 | 0    | 1.365691 | 1.8651121 | 21.63651 | 0.065506 | 18.58 |
| 300138 | 2016 | 0.193 | 0    | 1.365691 | 1.8651121 | 21.63651 | 0.065506 | 18.58 |
| 778    | 2016 | -0.1  | 0    | 1.365691 | 1.8651121 | 24.62062 | 0.024417 | 45.38 |
| 300138 | 2016 | 0.634 | 0    | 1.365691 | 1.8651121 | 21.53415 | 0.065506 | 18.58 |
| 300138 | 2016 | -0.69 | 0    | 1.365691 | 1.8651121 | 21.63651 | 0.065506 | 18.58 |
| 778    | 2016 | -0.55 | 0    | 1.365691 | 1.8651121 | 24.62062 | 0.024417 | 45.38 |
| 778    | 2016 | -0.54 | 0    | 1.365691 | 1.8651121 | 24.62062 | 0.024417 | 45.38 |
| 778    | 2016 | -0.6  | 0    | 1.365691 | 1.8651121 | 24.62062 | 0.024417 | 45.38 |
| 300138 | 2016 | 0.391 | 0    | 1.365691 | 1.8651121 | 21.63651 | 0.065506 | 18.58 |
| 778    | 2016 | -0.17 | 0    | 1.365691 | 1.8651121 | 24.62062 | 0.024417 | 45.38 |
| 778    | 2016 | -0.6  | 0    | 1.365691 | 1.8651121 | 24.62062 | 0.024417 | 45.38 |
| 300138 | 2016 | -0.03 | 0    | 1.365691 | 1.8651121 | 21.63651 | 0.065506 | 18.58 |
| 778    | 2016 | -0.5  | 0    | 1.365691 | 1.8651121 | 24.62062 | 0.024417 | 45.38 |
| 778    | 2016 | -0.6  | 0    | 1.365691 | 1.8651121 | 24.62062 | 0.024417 | 45.38 |
| 778    | 2016 | -0.07 | 0    | 1.365691 | 1.8651121 | 24.13224 | 0.024417 | 45.38 |
| 778    | 2016 | -0.4  | 0    | 1.365691 | 1.8651121 | 24.62062 | 0.024417 | 45.38 |
| 300138 | 2016 | 0.193 | 0    | 1.365691 | 1.8651121 | 21.63651 | 0.065506 | 18.58 |
| 2296   | 2016 | 1.371 | 0.03 | 1.732777 | 3.0025157 | 21.5275  | 0.055159 | 14.61 |
| 885    | 2016 | -0.44 | 0.03 | 1.732777 | 3.0025157 | 22.56582 | 0.025772 | 58.74 |
| 600222 | 2016 | 0.784 | 0.03 | 1.732777 | 3.0025157 | 21.69814 | 0.001236 | 23.08 |
| 600066 | 2016 | -0.24 | 0.03 | 1.732777 | 3.0025157 | 24.283   | 0.299898 | 37.19 |
| 300179 | 2016 | -0.32 | 0.03 | 1.732777 | 3.0025157 | 20.57432 | 0.039617 | 28.18 |
| 600066 | 2016 | -0.34 | 0.03 | 1.732777 | 3.0025157 | 24.283   | 0.299898 | 37.19 |
| 600595 | 2016 | -0.91 | 0.03 | 1.732777 | 3.0025157 | 23.99505 | 0.02743  | 49.84 |
| 601717 | 2016 | -0.62 | 0.03 | 1.732777 | 3.0025157 | 23.18694 | 0.003756 | 32.14 |
| 300480 | 2016 | 0.821 | 0.03 | 1.732777 | 3.0025157 | 20.13145 | 0.064379 | 49.81 |
| 600222 | 2016 | -0.54 | 0.03 | 1.732777 | 3.0025157 | 21.69814 | 0.001236 | 23.08 |
| 603508 | 2016 | 1.096 | 0.03 | 1.732777 | 3.0025157 | 21.64252 | 0.079028 | 25.01 |
| 300259 | 2016 | -0.07 | 0.03 | 1.732777 | 3.0025157 | 21.43862 | 0.062179 | 35.52 |
| 300007 | 2016 | 0.224 | 0.03 | 1.732777 | 3.0025157 | 22.04907 | 0.071701 | 21.74 |

|        |      |       |      |          |           |          |          |       |
|--------|------|-------|------|----------|-----------|----------|----------|-------|
| 300259 | 2016 | -0.15 | 0.03 | 1.732777 | 3.0025157 | 21.43862 | 0.062179 | 35.52 |
| 600222 | 2016 | -0.54 | 0.03 | 1.732777 | 3.0025157 | 21.69814 | 0.001236 | 23.08 |
| 885    | 2016 | -0.22 | 0.03 | 1.732777 | 3.0025157 | 22.06234 | 0.025772 | 58.74 |
| 2582   | 2016 | -0.64 | 0.03 | 1.732777 | 3.0025157 | 22.34187 | 0.012263 | 30.59 |
| 885    | 2016 | -0.88 | 0.03 | 1.732777 | 3.0025157 | 22.56582 | 0.025772 | 58.74 |
| 603508 | 2016 | 1.296 | 0.03 | 1.732777 | 3.0025157 | 21.70309 | 0.079028 | 25.01 |
| 600066 | 2016 | -0.09 | 0.03 | 1.732777 | 3.0025157 | 24.283   | 0.299898 | 37.19 |
| 600595 | 2016 | -0.8  | 0.03 | 1.732777 | 3.0025157 | 23.99505 | 0.02743  | 49.84 |
| 300064 | 2016 | -0.31 | 0.03 | 1.732777 | 3.0025157 | 22.85588 | 0.02073  | 20.46 |
| 601717 | 2016 | -0.29 | 0.03 | 1.732777 | 3.0025157 | 23.18694 | 0.003756 | 32.14 |
| 601717 | 2016 | -0.12 | 0.03 | 1.732777 | 3.0025157 | 23.18694 | 0.003756 | 32.14 |
| 300064 | 2016 | -0.31 | 0.03 | 1.732777 | 3.0025157 | 22.89977 | 0.02073  | 20.46 |
| 2431   | 2016 | -0.17 | 0.03 | 1.732777 | 3.0025157 | 23.33746 | 0.027803 | 13.54 |
| 300259 | 2016 | -0.15 | 0.03 | 1.732777 | 3.0025157 | 21.43862 | 0.062179 | 35.52 |
| 300480 | 2016 | 0.821 | 0.03 | 1.732777 | 3.0025157 | 20.13145 | 0.064379 | 49.81 |
| 300179 | 2016 | 0.067 | 0.03 | 1.732777 | 3.0025157 | 20.57432 | 0.039617 | 28.18 |
| 601677 | 2016 | -0.54 | 0.03 | 1.732777 | 3.0025157 | 22.50646 | 0.070685 | 20.74 |
| 2431   | 2016 | 0.103 | 0.03 | 1.732777 | 3.0025157 | 23.33746 | 0.027803 | 13.54 |
| 300007 | 2016 | -0.34 | 0.03 | 1.732777 | 3.0025157 | 22.04907 | 0.071701 | 21.74 |
| 676    | 2016 | 0.027 | 0.03 | 1.732777 | 3.0025157 | 22.59373 | 0.068606 | 45.78 |
| 603508 | 2016 | 1.23  | 0.03 | 1.732777 | 3.0025157 | 21.70309 | 0.079028 | 25.01 |
| 2296   | 2016 | 1.053 | 0.03 | 1.732777 | 3.0025157 | 21.5275  | 0.055159 | 14.61 |
| 2582   | 2016 | -0.7  | 0.03 | 1.732777 | 3.0025157 | 22.15172 | 0.012263 | 30.59 |
| 676    | 2016 | 0.074 | 0.03 | 1.732777 | 3.0025157 | 22.18117 | 0.068606 | 45.78 |
| 601677 | 2016 | -0.54 | 0.03 | 1.732777 | 3.0025157 | 22.2778  | 0.070685 | 20.74 |
| 300259 | 2016 | -0.07 | 0.03 | 1.732777 | 3.0025157 | 21.43862 | 0.062179 | 35.52 |
| 300064 | 2016 | -0.11 | 0.03 | 1.732777 | 3.0025157 | 22.89977 | 0.02073  | 20.46 |
| 600595 | 2016 | -0.95 | 0.03 | 1.732777 | 3.0025157 | 23.99505 | 0.02743  | 49.84 |
| 2296   | 2016 | 0.708 | 0.03 | 1.732777 | 3.0025157 | 21.5037  | 0.055159 | 14.61 |
| 300064 | 2016 | -0.06 | 0.03 | 1.732777 | 3.0025157 | 22.89977 | 0.02073  | 20.46 |
| 300259 | 2016 | 0.287 | 0.03 | 1.732777 | 3.0025157 | 21.43862 | 0.062179 | 35.52 |
| 600222 | 2016 | 0.784 | 0.03 | 1.732777 | 3.0025157 | 21.60944 | 0.001236 | 23.08 |
| 885    | 2016 | -0.88 | 0.03 | 1.732777 | 3.0025157 | 22.56582 | 0.025772 | 58.74 |
| 885    | 2016 | -0.22 | 0.03 | 1.732777 | 3.0025157 | 22.56582 | 0.025772 | 58.74 |
| 2431   | 2016 | 0.129 | 0.03 | 1.732777 | 3.0025157 | 23.33746 | 0.027803 | 13.54 |
| 2132   | 2016 | -0.49 | 0.03 | 1.732777 | 3.0025157 | 21.98292 | 0.037773 | 29.12 |
| 300064 | 2016 | 0.405 | 0.03 | 1.732777 | 3.0025157 | 22.89977 | 0.02073  | 20.46 |
| 300480 | 2016 | 0.797 | 0.03 | 1.732777 | 3.0025157 | 20.11072 | 0.064379 | 49.81 |
| 300259 | 2016 | -0.15 | 0.03 | 1.732777 | 3.0025157 | 21.43862 | 0.062179 | 35.52 |
| 300248 | 2016 | 1.313 | 0.03 | 1.732777 | 3.0025157 | 21.31897 | 0.07035  | 20.28 |
| 600222 | 2016 | -0.04 | 0.03 | 1.732777 | 3.0025157 | 21.69814 | 0.001236 | 23.08 |
| 600595 | 2016 | -0.57 | 0.03 | 1.732777 | 3.0025157 | 23.99505 | 0.02743  | 49.84 |
| 300007 | 2016 | 0.089 | 0.03 | 1.732777 | 3.0025157 | 22.04907 | 0.071701 | 21.74 |
| 603508 | 2016 | 1.097 | 0.03 | 1.732777 | 3.0025157 | 21.70309 | 0.079028 | 25.01 |
| 2582   | 2016 | 0.477 | 0.03 | 1.732777 | 3.0025157 | 22.34187 | 0.012263 | 30.59 |
| 300259 | 2016 | 0.123 | 0.03 | 1.732777 | 3.0025157 | 21.43862 | 0.062179 | 35.52 |
| 300259 | 2016 | -0.15 | 0.03 | 1.732777 | 3.0025157 | 21.43862 | 0.062179 | 35.52 |
| 600222 | 2016 | -0.08 | 0.03 | 1.732777 | 3.0025157 | 21.69814 | 0.001236 | 23.08 |
| 2216   | 2016 | -0.48 | 0.03 | 1.732777 | 3.0025157 | 22.14688 | 0.020606 | 10.34 |
| 603508 | 2016 | 1.096 | 0.03 | 1.732777 | 3.0025157 | 21.70309 | 0.079028 | 25.01 |
| 2431   | 2016 | 0.122 | 0.03 | 1.732777 | 3.0025157 | 23.22382 | 0.027803 | 13.54 |
| 300064 | 2016 | -0.53 | 0.03 | 1.732777 | 3.0025157 | 22.89977 | 0.02073  | 20.46 |
| 300007 | 2016 | -0.26 | 0.03 | 1.732777 | 3.0025157 | 21.59843 | 0.071701 | 21.74 |
| 300007 | 2016 | -0.34 | 0.03 | 1.732777 | 3.0025157 | 22.04907 | 0.071701 | 21.74 |

|        |      |       |      |          |           |          |          |       |
|--------|------|-------|------|----------|-----------|----------|----------|-------|
| 601677 | 2016 | -0.54 | 0.03 | 1.732777 | 3.0025157 | 22.50646 | 0.070685 | 20.74 |
| 2216   | 2016 | -0.48 | 0.03 | 1.732777 | 3.0025157 | 21.86382 | 0.020606 | 10.34 |
| 603508 | 2016 | 1.561 | 0.03 | 1.732777 | 3.0025157 | 21.70309 | 0.079028 | 25.01 |
| 676    | 2016 | -0.3  | 0.03 | 1.732777 | 3.0025157 | 22.59373 | 0.068606 | 45.78 |
| 600595 | 2016 | -0.57 | 0.03 | 1.732777 | 3.0025157 | 23.99505 | 0.02743  | 49.84 |
| 300007 | 2016 | 0.073 | 0.03 | 1.732777 | 3.0025157 | 22.04907 | 0.071701 | 21.74 |
| 2216   | 2016 | -0.48 | 0.03 | 1.732777 | 3.0025157 | 22.14688 | 0.020606 | 10.34 |
| 300248 | 2016 | 0.38  | 0.03 | 1.732777 | 3.0025157 | 21.23513 | 0.07035  | 20.28 |
| 2431   | 2016 | -0.25 | 0.03 | 1.732777 | 3.0025157 | 23.33746 | 0.027803 | 13.54 |
| 676    | 2016 | 0.027 | 0.03 | 1.732777 | 3.0025157 | 22.59373 | 0.068606 | 45.78 |
| 2296   | 2016 | 1.053 | 0.03 | 1.732777 | 3.0025157 | 21.5275  | 0.055159 | 14.61 |
| 603508 | 2016 | 1.36  | 0.03 | 1.732777 | 3.0025157 | 21.70309 | 0.079028 | 25.01 |
| 300007 | 2016 | -0.34 | 0.03 | 1.732777 | 3.0025157 | 22.04907 | 0.071701 | 21.74 |
| 2132   | 2016 | -0.49 | 0.03 | 1.732777 | 3.0025157 | 22.17703 | 0.037773 | 29.12 |
| 2296   | 2016 | 1.371 | 0.03 | 1.732777 | 3.0025157 | 21.5275  | 0.055159 | 14.61 |
| 2132   | 2016 | -0.3  | 0.03 | 1.732777 | 3.0025157 | 22.17703 | 0.037773 | 29.12 |
| 2296   | 2016 | 1.097 | 0.03 | 1.732777 | 3.0025157 | 21.5275  | 0.055159 | 14.61 |
| 300259 | 2016 | 0.376 | 0.03 | 1.732777 | 3.0025157 | 21.43862 | 0.062179 | 35.52 |
| 676    | 2016 | 0.027 | 0.03 | 1.732777 | 3.0025157 | 22.59373 | 0.068606 | 45.78 |
| 601677 | 2016 | -0.54 | 0.03 | 1.732777 | 3.0025157 | 22.50646 | 0.070685 | 20.74 |
| 676    | 2016 | 0.027 | 0.03 | 1.732777 | 3.0025157 | 22.59373 | 0.068606 | 45.78 |
| 600066 | 2016 | -0.03 | 0.03 | 1.732777 | 3.0025157 | 24.22115 | 0.299898 | 37.19 |
| 300259 | 2016 | -0.15 | 0.03 | 1.732777 | 3.0025157 | 21.43862 | 0.062179 | 35.52 |
| 601717 | 2016 | -0.12 | 0.03 | 1.732777 | 3.0025157 | 23.18694 | 0.003756 | 32.14 |
| 2582   | 2016 | -0.85 | 0.03 | 1.732777 | 3.0025157 | 22.34187 | 0.012263 | 30.59 |
| 601677 | 2016 | -0.54 | 0.03 | 1.732777 | 3.00E+00  | 22.50646 | 0.070685 | 20.74 |
| 2296   | 2016 | 0.708 | 0.03 | 1.732777 | 3.00E+00  | 21.5275  | 0.055159 | 14.61 |
| 300007 | 2016 | 0.981 | 0.03 | 1.732777 | 3.00E+00  | 22.04907 | 0.071701 | 21.74 |
| 300480 | 2016 | 0.821 | 0.03 | 1.732777 | 3.00E+00  | 20.13145 | 0.064379 | 49.81 |
| 600595 | 2016 | -0.91 | 0.03 | 1.732777 | 3.00E+00  | 23.66574 | 0.02743  | 49.84 |
| 300007 | 2016 | -0.09 | 0.03 | 1.732777 | 3.00E+00  | 22.04907 | 0.071701 | 21.74 |
| 300259 | 2016 | -0.15 | 0.03 | 1.732777 | 3.00E+00  | 21.43862 | 0.062179 | 35.52 |
| 600595 | 2016 | -0.91 | 0.03 | 1.732777 | 3.00E+00  | 23.99505 | 0.02743  | 49.84 |
| 300007 | 2016 | 0.295 | 0.03 | 1.732777 | 3.00E+00  | 22.04907 | 0.071701 | 21.74 |
| 2582   | 2016 | -0.73 | 0.03 | 1.732777 | 3.00E+00  | 22.34187 | 0.012263 | 30.59 |
| 300007 | 2016 | -0.34 | 0.03 | 1.732777 | 3.00E+00  | 22.04907 | 0.071701 | 21.74 |
| 2132   | 2016 | -0.46 | 0.03 | 1.732777 | 3.00E+00  | 22.17703 | 0.037773 | 29.12 |
| 2582   | 2016 | 0.477 | 0.03 | 1.732777 | 3.00E+00  | 22.34187 | 0.012263 | 30.59 |
| 300179 | 2016 | 0.092 | 0.03 | 1.732777 | 3.00E+00  | 20.57432 | 0.039617 | 28.18 |
| 300064 | 2016 | -0.11 | 0.03 | 1.732777 | 3.00E+00  | 22.89977 | 0.02073  | 20.46 |
| 601717 | 2016 | -0.13 | 0.03 | 1.732777 | 3.00E+00  | 23.18694 | 0.003756 | 32.14 |
| 601717 | 2016 | -0.45 | 0.03 | 1.732777 | 3.00E+00  | 23.18694 | 0.003756 | 32.14 |
| 300179 | 2016 | -0.32 | 0.03 | 1.732777 | 3.00E+00  | 20.59785 | 0.039617 | 28.18 |
| 601717 | 2016 | -0.45 | 0.03 | 1.732777 | 3.00E+00  | 23.12616 | 0.003756 | 32.14 |
| 600595 | 2016 | -0.63 | 0.03 | 1.732777 | 3.0025157 | 23.99505 | 0.02743  | 49.84 |
| 2132   | 2016 | -0.36 | 0.03 | 1.732777 | 3.0025157 | 22.17703 | 0.037773 | 29.12 |
| 300064 | 2016 | 0.131 | 0.03 | 1.732777 | 3.0025157 | 22.89977 | 0.02073  | 20.46 |
| 300179 | 2016 | 0.092 | 0.03 | 1.732777 | 3.0025157 | 20.57432 | 0.039617 | 28.18 |
| 300007 | 2016 | -0.18 | 0.03 | 1.732777 | 3.0025157 | 22.04907 | 0.071701 | 21.74 |
| 300007 | 2016 | 0.81  | 0.03 | 1.732777 | 3.0025157 | 22.04907 | 0.071701 | 21.74 |
| 2296   | 2016 | 1.169 | 0.03 | 1.732777 | 3.0025157 | 21.5275  | 0.055159 | 14.61 |
| 300248 | 2016 | 1.16  | 0.03 | 1.732777 | 3.0025157 | 21.31897 | 0.07035  | 20.28 |
| 600222 | 2016 | 0.784 | 0.03 | 1.732777 | 3.0025157 | 21.69814 | 0.001236 | 23.08 |
| 676    | 2016 | 0.027 | 0.03 | 1.732777 | 3.0025157 | 22.59373 | 0.068606 | 45.78 |

|        |      |       |      |          |           |          |          |       |
|--------|------|-------|------|----------|-----------|----------|----------|-------|
| 300007 | 2016 | -0.34 | 0.03 | 1.732777 | 3.0025157 | 22.04907 | 0.071701 | 21.74 |
| 2296   | 2016 | 1.371 | 0.03 | 1.732777 | 3.0025157 | 21.5275  | 0.055159 | 14.61 |
| 600222 | 2016 | 0.784 | 0.03 | 1.732777 | 3.0025157 | 21.69814 | 0.001236 | 23.08 |
| 676    | 2016 | 0.027 | 0.03 | 1.732777 | 3.0025157 | 22.59373 | 0.068606 | 45.78 |
| 601717 | 2016 | -0.45 | 0.03 | 1.732777 | 3.0025157 | 23.18694 | 0.003756 | 32.14 |
| 600222 | 2016 | -0.32 | 0.03 | 1.732777 | 3.0025157 | 21.69814 | 0.001236 | 23.08 |
| 300248 | 2016 | 0.403 | 0.03 | 1.732777 | 3.0025157 | 21.31897 | 0.07035  | 20.28 |
| 2132   | 2016 | -0.44 | 0.03 | 1.732777 | 3.0025157 | 22.17703 | 0.037773 | 29.12 |
| 300480 | 2016 | 0.99  | 0.03 | 1.732777 | 3.0025157 | 20.13145 | 0.064379 | 49.81 |
| 600066 | 2016 | -0.03 | 0.03 | 1.732777 | 3.0025157 | 24.283   | 0.299898 | 37.19 |
| 300259 | 2016 | -0.15 | 0.03 | 1.732777 | 3.0025157 | 21.36902 | 0.062179 | 35.52 |
| 300248 | 2016 | 1.313 | 0.03 | 1.732777 | 3.0025157 | 21.31897 | 0.07035  | 20.28 |
| 300007 | 2016 | 0.161 | 0.03 | 1.732777 | 3.0025157 | 22.04907 | 0.071701 | 21.74 |
| 2216   | 2016 | -0.48 | 0.03 | 1.732777 | 3.0025157 | 22.14688 | 0.020606 | 10.34 |
| 2296   | 2016 | 0.438 | 0.03 | 1.732777 | 3.0025157 | 21.5275  | 0.055159 | 14.61 |
| 2296   | 2016 | 0.708 | 0.03 | 1.732777 | 3.0025157 | 21.5275  | 0.055159 | 14.61 |
| 601717 | 2016 | -0.45 | 0.03 | 1.732777 | 3.0025157 | 23.18694 | 0.003756 | 32.14 |
| 601717 | 2016 | -0.45 | 0.03 | 1.732777 | 3.0025157 | 23.18694 | 0.003756 | 32.14 |
| 300007 | 2016 | -0.34 | 0.03 | 1.732777 | 3.0025157 | 22.04907 | 0.071701 | 21.74 |
| 600066 | 2016 | -0.47 | 0.03 | 1.732777 | 3.0025157 | 24.283   | 0.299898 | 37.19 |
| 2431   | 2016 | -0.12 | 0.03 | 1.732777 | 3.0025157 | 23.33746 | 0.027803 | 13.54 |
| 300248 | 2016 | 0.214 | 0.03 | 1.732777 | 3.0025157 | 21.31897 | 0.07035  | 20.28 |
| 300064 | 2016 | -0.02 | 0.03 | 1.732777 | 3.0025157 | 22.89977 | 0.02073  | 20.46 |
| 601717 | 2016 | -0.45 | 0.03 | 1.732777 | 3.0025157 | 23.18694 | 0.003756 | 32.14 |
| 2431   | 2016 | 0.164 | 0.03 | 1.732777 | 3.0025157 | 23.33746 | 0.027803 | 13.54 |
| 2716   | 2016 | 0.443 | 0.04 | 1.269243 | 1.6109771 | 22.7485  | 0.060856 | 33.73 |
| 2716   | 2016 | 0.798 | 0.04 | 1.269243 | 1.6109771 | 22.77741 | 0.060856 | 33.73 |
| 2716   | 2016 | 0.459 | 0.04 | 1.269243 | 1.6109771 | 22.77741 | 0.060856 | 33.73 |
| 2716   | 2016 | 0.798 | 0.04 | 1.269243 | 1.61E+00  | 22.77741 | 0.060856 | 33.73 |
| 2716   | 2016 | 0.443 | 0.04 | 1.269243 | 1.61E+00  | 22.77741 | 0.060856 | 33.73 |
| 600295 | 2016 | -0.24 | 0.01 | 1.625177 | 2.64E+00  | 24.53579 | 0.041276 | 40.7  |
| 600295 | 2016 | -0.84 | 0.01 | 1.625177 | 2.64E+00  | 24.53579 | 0.041276 | 40.7  |
| 683    | 2016 | -0.6  | 0.01 | 1.625177 | 2.64E+00  | 23.82486 | -0.06492 | 34.13 |
| 600295 | 2016 | -0.84 | 0.01 | 1.625177 | 2.64E+00  | 24.53579 | 0.041276 | 40.7  |
| 600295 | 2016 | -0.67 | 0.01 | 1.625177 | 2.64E+00  | 24.53579 | 0.041276 | 40.7  |
| 683    | 2016 | -0.6  | 0.01 | 1.625177 | 2.64E+00  | 23.82486 | -0.06492 | 34.13 |
| 600295 | 2016 | -0.84 | 0.01 | 1.625177 | 2.6412003 | 24.53579 | 0.041276 | 40.7  |
| 683    | 2016 | -0.89 | 0.01 | 1.625177 | 2.6412003 | 23.82486 | -0.06492 | 34.13 |
| 600295 | 2016 | -0.24 | 0.01 | 1.625177 | 2.6412003 | 24.53579 | 0.041276 | 40.7  |
| 683    | 2016 | 0.391 | 0.01 | 1.625177 | 2.6412003 | 23.82486 | -0.06492 | 34.13 |
| 683    | 2016 | -0.11 | 0.01 | 1.625177 | 2.6412003 | 23.82486 | -0.06492 | 34.13 |
| 683    | 2016 | -0.89 | 0.01 | 1.625177 | 2.6412003 | 23.82486 | -0.06492 | 34.13 |
| 683    | 2016 | -0.6  | 0.01 | 1.625177 | 2.6412003 | 23.10946 | -0.06492 | 34.13 |
| 600295 | 2016 | -0.84 | 0.01 | 1.625177 | 2.6412003 | 23.46433 | 0.041276 | 40.7  |
| 683    | 2016 | -0.6  | 0.01 | 1.625177 | 2.6412003 | 23.82486 | -0.06492 | 34.13 |
| 2694   | 2016 | 0.503 | 0.05 | 1.151809 | 1.3266631 | 21.26881 | 0.046592 | 27.78 |
| 2694   | 2016 | -0.39 | 0.05 | 1.151809 | 1.3266631 | 21.55421 | 0.046592 | 27.78 |
| 2694   | 2016 | -0.39 | 0.05 | 1.151809 | 1.3266631 | 21.55421 | 0.046592 | 27.78 |
| 2694   | 2016 | -0.82 | 0.05 | 1.151809 | 1.3266631 | 21.55421 | 0.046592 | 27.78 |
| 2694   | 2016 | -0.48 | 0.05 | 1.151809 | 1.3266631 | 21.55421 | 0.046592 | 27.78 |
| 2694   | 2016 | -0.48 | 0.05 | 1.151809 | 1.3266631 | 21.55421 | 0.046592 | 27.78 |
| 2694   | 2016 | -0.42 | 0.05 | 1.151809 | 1.3266631 | 21.55421 | 0.046592 | 27.78 |
| 2694   | 2016 | -0.47 | 0.05 | 1.151809 | 1.3266631 | 21.55421 | 0.046592 | 27.78 |
| 2694   | 2016 | -0.48 | 0.05 | 1.151809 | 1.3266631 | 21.55421 | 0.046592 | 27.78 |

|        |      |       |      |          |            |          |          |       |
|--------|------|-------|------|----------|------------|----------|----------|-------|
| 300021 | 2016 | -0.1  | 0.02 | 0.043374 | 0.00188127 | 21.63399 | 0.045031 | 45.48 |
| 300021 | 2016 | -0.1  | 0.02 | 0.043374 | 0.00188127 | 21.63399 | 0.045031 | 45.48 |
| 300021 | 2016 | -0.1  | 0.02 | 0.043374 | 0.00188127 | 21.63399 | 0.045031 | 45.48 |
| 300021 | 2016 | -0.14 | 0.02 | 0.043374 | 0.00188127 | 21.49253 | 0.045031 | 45.48 |
| 600354 | 2016 | -0.75 | 0.02 | 0.043374 | 0.00188127 | 21.42318 | -0.23074 | 12.92 |
| 600354 | 2016 | -0.75 | 0.02 | 0.043374 | 0.00188127 | 21.83227 | -0.23074 | 12.92 |
| 300021 | 2016 | -0.86 | 0.02 | 0.043374 | 0.00188127 | 21.63399 | 0.045031 | 45.48 |
| 300021 | 2016 | -0.08 | 0.02 | 0.043374 | 0.00188127 | 21.63399 | 0.045031 | 45.48 |
| 600354 | 2016 | -0.75 | 0.02 | 0.043374 | 0.00188127 | 21.83227 | -0.23074 | 12.92 |
| 300021 | 2016 | -0.1  | 0.02 | 0.043374 | 0.00188127 | 21.63399 | 0.045031 | 45.48 |
| 600354 | 2016 | -0.75 | 0.02 | 0.043374 | 0.00188127 | 21.83227 | -0.23074 | 12.92 |
| 300021 | 2016 | -0.1  | 0.02 | 0.043374 | 0.00188127 | 21.63399 | 0.045031 | 45.48 |
| 600354 | 2016 | -0.75 | 0.02 | 0.043374 | 0.00188127 | 21.83227 | -0.23074 | 12.92 |
| 600354 | 2016 | -0.75 | 0.02 | 0.043374 | 0.00188127 | 21.83227 | -0.23074 | 12.92 |
| 300021 | 2016 | -0.86 | 0.02 | 0.043374 | 0.00188127 | 21.63399 | 0.045031 | 45.48 |
| 300021 | 2016 | -0.02 | 0.02 | 0.043374 | 0.00188127 | 21.63399 | 0.045031 | 45.48 |
| 600354 | 2016 | -0.75 | 0.02 | 0.043374 | 0.00188127 | 21.83227 | -0.23074 | 12.92 |
| 600354 | 2016 | -0.75 | 0.02 | 0.043374 | 0.00188127 | 21.83227 | -0.23074 | 12.92 |
| 300021 | 2016 | -0.1  | 0.02 | 0.043374 | 0.00188127 | 21.63399 | 0.045031 | 45.48 |
| 300021 | 2016 | -0.1  | 0.02 | 0.043374 | 0.00188127 | 21.63399 | 0.045031 | 45.48 |
| 300021 | 2016 | -0.86 | 0.02 | 0.043374 | 0.00188127 | 21.63399 | 0.045031 | 45.48 |
| 300021 | 2016 | -0.14 | 0.02 | 0.043374 | 0.00188127 | 21.63399 | 0.045031 | 45.48 |
| 980    | 2016 | -0.5  | 0.04 | 0.405465 | 0.16440195 | 22.13745 | 0.04028  | 19.99 |
| 2199   | 2016 | 0.361 | 0.04 | 0.405465 | 0.16440195 | 20.30826 | 0.016121 | 14.8  |
| 2632   | 2016 | -0.58 | 0.04 | 0.405465 | 0.16440195 | 21.19823 | 0.030491 | 42.18 |
| 2634   | 2016 | -0.22 | 0.04 | 0.405465 | 0.16440195 | 20.56197 | 0.053139 | 37.5  |
| 600572 | 2016 | -0.1  | 0.04 | 0.405465 | 0.16440195 | 22.86277 | 0.090046 | 27.4  |
| 600572 | 2016 | -0.13 | 0.04 | 0.405465 | 0.16440195 | 22.86277 | 0.090046 | 27.4  |
| 600572 | 2016 | -0.77 | 0.04 | 0.405465 | 0.16440195 | 22.86277 | 0.090046 | 27.4  |
| 2634   | 2016 | -0.22 | 0.04 | 0.405465 | 0.16440195 | 20.81222 | 0.053139 | 37.5  |
| 2632   | 2016 | -0.5  | 0.04 | 0.405465 | 0.16440195 | 21.19823 | 0.030491 | 42.18 |
| 739    | 2016 | 0.339 | 0.04 | 0.405465 | 0.16440195 | 22.44941 | 0.100477 | 23.52 |
| 2056   | 2016 | 0.026 | 0.04 | 0.405465 | 0.16440195 | 22.47272 | 0.111001 | 50.15 |
| 2199   | 2016 | 0.361 | 0.04 | 0.405465 | 0.16440195 | 20.30826 | 0.016121 | 14.8  |
| 2703   | 2016 | -0.59 | 0.04 | 0.405465 | 0.16440195 | 21.4531  | 0.044175 | 44.01 |
| 2434   | 2016 | -0.38 | 0.04 | 0.405465 | 0.16440195 | 23.01388 | 0.054469 | 28.45 |
| 2615   | 2016 | -0.35 | 0.04 | 0.405465 | 0.16440195 | 20.93231 | 0.154905 | 48.4  |
| 2632   | 2016 | -0.5  | 0.04 | 0.405465 | 0.16440195 | 21.19823 | 0.030491 | 42.18 |
| 980    | 2016 | -0.43 | 0.04 | 0.405465 | 0.16440195 | 22.13745 | 0.04028  | 19.99 |
| 980    | 2016 | -0.17 | 0.04 | 0.405465 | 0.16440195 | 22.13745 | 0.04028  | 19.99 |
| 739    | 2016 | 0.644 | 0.04 | 0.405465 | 0.16440195 | 22.44941 | 0.100477 | 23.52 |
| 2619   | 2016 | -0.41 | 0.04 | 0.405465 | 0.16440195 | 22.07795 | 0.062656 | 15.46 |
| 2434   | 2016 | -0.38 | 0.04 | 0.405465 | 0.16440195 | 23.01388 | 0.054469 | 28.45 |
| 2199   | 2016 | 0.361 | 0.04 | 0.405465 | 0.16440195 | 20.30826 | 0.016121 | 14.8  |
| 600572 | 2016 | -0.1  | 0.04 | 0.405465 | 0.16440195 | 22.86277 | 0.090046 | 27.4  |
| 600668 | 2016 | -0.82 | 0.04 | 0.405465 | 0.16440195 | 22.10826 | 0.121025 | 16.15 |
| 2703   | 2016 | -0.59 | 0.04 | 0.405465 | 0.16440195 | 21.4531  | 0.044175 | 44.01 |
| 300027 | 2016 | 0.731 | 0.04 | 0.405465 | 0.16440195 | 23.55569 | 0.100905 | 20.76 |
| 2434   | 2016 | -0.63 | 0.04 | 0.405465 | 0.16440195 | 23.01388 | 0.054469 | 28.45 |
| 2199   | 2016 | 0.361 | 0.04 | 0.405465 | 0.16440195 | 20.30826 | 0.016121 | 14.8  |
| 600572 | 2016 | -0.58 | 0.04 | 0.405465 | 0.16440195 | 22.86277 | 0.090046 | 27.4  |
| 600572 | 2016 | -0.1  | 0.04 | 0.405465 | 0.16440195 | 22.86277 | 0.090046 | 27.4  |
| 2056   | 2016 | 0.07  | 0.04 | 0.405465 | 0.16440195 | 22.48605 | 0.111001 | 50.15 |
| 300027 | 2016 | 0.503 | 0.04 | 0.405465 | 0.16440195 | 23.7116  | 0.100905 | 20.76 |



|        |      |       |      |          |            |          |          |       |
|--------|------|-------|------|----------|------------|----------|----------|-------|
| 600572 | 2016 | -0.25 | 0.04 | 0.405465 | 0.16440195 | 22.86277 | 0.090046 | 27.4  |
| 739    | 2016 | 0.215 | 0.04 | 0.405465 | 0.16440195 | 22.44941 | 0.100477 | 23.52 |
| 601113 | 2016 | 0.327 | 0.04 | 0.405465 | 0.16440195 | 22.21295 | 0.028308 | 31.87 |
| 739    | 2016 | 0.644 | 0.04 | 0.405465 | 0.16440195 | 22.44941 | 0.100477 | 23.52 |
| 2434   | 2016 | -0.38 | 0.04 | 0.405465 | 0.16440195 | 22.73031 | 0.054469 | 28.45 |
| 739    | 2016 | 0.644 | 0.04 | 0.405465 | 0.16440195 | 22.44941 | 0.100477 | 23.52 |
| 2779   | 2016 | -0.19 | 0.04 | 0.405465 | 0.16440195 | 20.45411 | 0.057691 | 51.55 |
| 2056   | 2016 | 0.07  | 0.04 | 0.405465 | 0.16440195 | 22.48605 | 0.111001 | 50.15 |
| 601113 | 2016 | 0.433 | 0.04 | 0.405465 | 0.16440195 | 22.21295 | 0.028308 | 31.87 |
| 739    | 2016 | 0.244 | 0.04 | 0.405465 | 0.16440195 | 22.44941 | 0.100477 | 23.52 |
| 600572 | 2016 | -0.1  | 0.04 | 0.405465 | 0.16440195 | 22.86277 | 0.090046 | 27.4  |
| 300234 | 2016 | 0.378 | 0.04 | 0.405465 | 0.16440195 | 20.89404 | 0.02961  | 33.36 |
| 2434   | 2016 | -0.63 | 0.04 | 0.405465 | 0.16440195 | 23.01388 | 0.054469 | 28.45 |
| 2615   | 2016 | -0.33 | 0.04 | 0.405465 | 0.16440195 | 20.93231 | 0.154905 | 48.4  |
| 600572 | 2016 | 0.558 | 0.04 | 0.405465 | 0.16440195 | 22.81819 | 0.090046 | 27.4  |
| 980    | 2016 | -0.35 | 0.04 | 0.405465 | 0.16440195 | 21.78944 | 0.04028  | 19.99 |
| 300027 | 2016 | 0.731 | 0.04 | 0.405465 | 0.16440195 | 23.55569 | 0.100905 | 20.76 |
| 2703   | 2016 | 0.595 | 0.04 | 0.405465 | 0.16440195 | 21.4531  | 0.044175 | 44.01 |
| 2619   | 2016 | -0.41 | 0.04 | 0.405465 | 0.16440195 | 22.07795 | 0.062656 | 15.46 |
| 600572 | 2016 | -0.1  | 0.04 | 0.405465 | 0.16440195 | 22.86277 | 0.090046 | 27.4  |
| 600572 | 2016 | -0.73 | 0.04 | 0.405465 | 0.16440195 | 22.86277 | 0.090046 | 27.4  |
| 739    | 2016 | 0.244 | 0.04 | 0.405465 | 0.16440195 | 22.44941 | 0.100477 | 23.52 |
| 300027 | 2016 | 0.731 | 0.04 | 0.405465 | 0.16440195 | 23.55569 | 0.100905 | 20.76 |
| 739    | 2016 | 0.644 | 0.04 | 0.405465 | 0.16440195 | 22.44941 | 0.100477 | 23.52 |
| 2434   | 2016 | -0.4  | 0.04 | 0.405465 | 0.16440195 | 23.01388 | 0.054469 | 28.45 |
| 2779   | 2016 | -0.19 | 0.04 | 0.405465 | 0.16440195 | 20.45411 | 0.057691 | 51.55 |
| 2615   | 2016 | -0.52 | 0.04 | 0.405465 | 0.16440195 | 21.10263 | 0.154905 | 48.4  |
| 600668 | 2016 | -0.82 | 0.04 | 0.405465 | 0.16440195 | 22.10826 | 0.121025 | 16.15 |
| 600572 | 2016 | 0.135 | 0.04 | 0.405465 | 0.16440195 | 22.86277 | 0.090046 | 27.4  |
| 600572 | 2016 | -0.1  | 0.04 | 0.405465 | 0.16440195 | 22.86277 | 0.090046 | 27.4  |
| 2615   | 2016 | -0.62 | 0.04 | 0.405465 | 0.16440195 | 21.10263 | 0.154905 | 48.4  |
| 300234 | 2016 | 0.378 | 0.04 | 0.405465 | 0.16440195 | 20.89404 | 0.02961  | 33.36 |
| 739    | 2016 | 0.644 | 0.04 | 0.405465 | 0.16440195 | 22.44941 | 0.100477 | 23.52 |
| 739    | 2016 | 0.644 | 0.04 | 0.405465 | 0.16440195 | 22.44941 | 0.100477 | 23.52 |
| 2632   | 2016 | -0.5  | 0.04 | 0.405465 | 0.16440195 | 21.19823 | 0.030491 | 42.18 |
| 300234 | 2016 | 0.378 | 0.04 | 0.405465 | 0.16440195 | 20.89404 | 0.02961  | 33.36 |
| 601113 | 2016 | 0.221 | 0.04 | 0.405465 | 0.16440195 | 22.21295 | 0.028308 | 31.87 |
| 300027 | 2016 | 0.274 | 0.04 | 0.405465 | 0.16440195 | 23.55569 | 0.100905 | 20.76 |
| 2632   | 2016 | -0.58 | 0.04 | 0.405465 | 0.16440195 | 21.19823 | 0.030491 | 42.18 |
| 601113 | 2016 | 0.433 | 0.04 | 0.405465 | 0.16440195 | 22.12024 | 0.028308 | 31.87 |
| 600668 | 2016 | 0.507 | 0.04 | 0.405465 | 0.16440195 | 22.10826 | 0.121025 | 16.15 |
| 980    | 2016 | -0.58 | 0.04 | 0.405465 | 0.16440195 | 22.13745 | 0.04028  | 19.99 |
| 600572 | 2016 | -0.77 | 0.04 | 0.405465 | 0.16440195 | 22.86277 | 0.090046 | 27.4  |
| 739    | 2016 | 0.644 | 0.04 | 0.405465 | 0.16440195 | 22.44941 | 0.100477 | 23.52 |
| 600668 | 2016 | -0.82 | 0.04 | 0.405465 | 0.16440195 | 21.70054 | 0.121025 | 16.15 |
| 600572 | 2016 | -0.6  | 0.04 | 0.405465 | 0.16440195 | 22.86277 | 0.090046 | 27.4  |
| 600668 | 2016 | 0.507 | 0.04 | 0.405465 | 0.16440195 | 22.10826 | 0.121025 | 16.15 |
| 600572 | 2016 | -0.1  | 0.04 | 0.405465 | 0.16440195 | 22.86277 | 0.090046 | 27.4  |
| 600572 | 2016 | -0.73 | 0.04 | 0.405465 | 0.16440195 | 22.86277 | 0.090046 | 27.4  |
| 600572 | 2016 | -0.77 | 0.04 | 0.405465 | 0.16440195 | 22.86277 | 0.090046 | 27.4  |
| 739    | 2016 | -0.68 | 0.04 | 0.405465 | 0.16440195 | 22.44941 | 0.100477 | 23.52 |
| 600668 | 2016 | -0.82 | 0.04 | 0.405465 | 0.16440195 | 22.10826 | 0.121025 | 16.15 |
| 2703   | 2016 | 0.068 | 0.04 | 0.405465 | 0.16440195 | 21.4531  | 0.044175 | 44.01 |
| 600572 | 2016 | -0.1  | 0.04 | 0.405465 | 0.16440195 | 22.86277 | 0.090046 | 27.4  |

|        |      |       |      |          |            |          |          |       |
|--------|------|-------|------|----------|------------|----------|----------|-------|
| 601113 | 2016 | -0.66 | 0.04 | 0.405465 | 0.16440195 | 22.21295 | 0.028308 | 31.87 |
| 2615   | 2016 | -0.47 | 0.04 | 0.405465 | 0.16440195 | 21.10263 | 0.154905 | 48.4  |
| 2434   | 2016 | -0.38 | 0.04 | 0.405465 | 0.16440195 | 23.01388 | 0.054469 | 28.45 |
| 2199   | 2016 | 0.361 | 0.04 | 0.405465 | 0.16440195 | 20.10336 | 0.016121 | 14.8  |
| 2056   | 2016 | -0.59 | 0.04 | 0.405465 | 0.16440195 | 22.48605 | 0.111001 | 50.15 |
| 600668 | 2016 | -0.82 | 0.04 | 0.405465 | 0.16440195 | 22.10826 | 0.121025 | 16.15 |
| 739    | 2016 | 0.644 | 0.04 | 0.405465 | 0.16440195 | 22.44941 | 0.100477 | 23.52 |
| 739    | 2016 | 0.644 | 0.04 | 0.405465 | 0.16440195 | 21.40392 | 0.100477 | 23.52 |
| 2434   | 2016 | -0.38 | 0.04 | 0.405465 | 0.16440195 | 23.01388 | 0.054469 | 28.45 |
| 2632   | 2016 | -0.5  | 0.04 | 0.405465 | 0.16440195 | 21.19823 | 0.030491 | 42.18 |
| 600668 | 2016 | -0.82 | 0.04 | 0.405465 | 0.16440195 | 22.10826 | 0.121025 | 16.15 |
| 600668 | 2016 | -0.02 | 0.04 | 0.405465 | 0.16440195 | 22.10826 | 0.121025 | 16.15 |
| 300234 | 2016 | 0.378 | 0.04 | 0.405465 | 0.16440195 | 20.89404 | 0.02961  | 33.36 |
| 980    | 2016 | -0.17 | 0.04 | 0.405465 | 0.16440195 | 22.13745 | 0.04028  | 19.99 |
| 2615   | 2016 | -0.33 | 0.04 | 0.405465 | 0.16440195 | 20.93231 | 0.154905 | 48.4  |
| 600668 | 2016 | -0.82 | 0.04 | 0.405465 | 0.16440195 | 22.10826 | 0.121025 | 16.15 |
| 600668 | 2016 | -0.02 | 0.04 | 0.405465 | 0.16440195 | 22.10826 | 0.121025 | 16.15 |
| 2632   | 2016 | -0.5  | 0.04 | 0.405465 | 0.16440195 | 21.19823 | 0.030491 | 42.18 |
| 739    | 2016 | 0.644 | 0.04 | 0.405465 | 0.16440195 | 22.44941 | 0.100477 | 23.52 |
| 2632   | 2016 | -0.5  | 0.04 | 0.405465 | 0.16440195 | 21.19581 | 0.030491 | 42.18 |
| 739    | 2016 | 0.644 | 0.04 | 0.405465 | 0.16440195 | 22.44941 | 0.100477 | 23.52 |
| 2703   | 2016 | 0.068 | 0.04 | 0.405465 | 0.16440195 | 20.82889 | 0.044175 | 44.01 |
| 2199   | 2016 | 0.361 | 0.04 | 0.405465 | 0.16440195 | 20.30826 | 0.016121 | 14.8  |
| 2632   | 2016 | -0.5  | 0.04 | 0.405465 | 0.16440195 | 21.19823 | 0.030491 | 42.18 |
| 2056   | 2016 | -0.59 | 0.04 | 0.405465 | 0.16440195 | 22.48605 | 0.111001 | 50.15 |
| 300027 | 2016 | 0.388 | 0.04 | 0.405465 | 0.16440195 | 23.7116  | 0.100905 | 20.76 |
| 601113 | 2016 | 0.662 | 0.04 | 0.405465 | 0.16440195 | 22.21295 | 0.028308 | 31.87 |
| 2619   | 2016 | -0.41 | 0.04 | 0.405465 | 0.16440195 | 21.95097 | 0.062656 | 15.46 |
| 2615   | 2016 | -0.15 | 0.04 | 0.405465 | 0.16440195 | 21.10263 | 0.154905 | 48.4  |
| 2615   | 2016 | -0.52 | 0.04 | 0.405465 | 0.16440195 | 20.93231 | 0.154905 | 48.4  |
| 2632   | 2016 | -0    | 0.04 | 0.405465 | 0.16440195 | 21.19823 | 0.030491 | 42.18 |
| 2703   | 2016 | 0.068 | 0.04 | 0.405465 | 0.16440195 | 21.4531  | 0.044175 | 44.01 |
| 739    | 2016 | 0.644 | 0.04 | 0.405465 | 0.16440195 | 22.44941 | 0.100477 | 23.52 |
| 2779   | 2016 | -0.19 | 0.04 | 0.405465 | 0.16440195 | 20.45411 | 0.057691 | 51.55 |
| 2634   | 2016 | -0.22 | 0.04 | 0.405465 | 0.16440195 | 20.81222 | 0.053139 | 37.5  |
| 300234 | 2016 | 0.378 | 0.04 | 0.405465 | 0.16440195 | 20.85906 | 0.02961  | 33.36 |
| 600470 | 2016 | -0.19 | 0.03 | 1.55572  | 2.4202654  | 22.48752 | -0.10779 | 25.49 |
| 600577 | 2016 | 0.603 | 0.03 | 1.55572  | 2.4202654  | 22.31354 | 0.077765 | 21.8  |
| 600237 | 2016 | -0.31 | 0.03 | 1.55572  | 2.4202654  | 21.48761 | -0.17453 | 16.76 |
| 630    | 2016 | -0.82 | 0.03 | 1.55572  | 2.4202654  | 24.52086 | 0.018508 | 39.55 |
| 600470 | 2016 | 0.518 | 0.03 | 1.55572  | 2.4202654  | 22.48752 | -0.10779 | 25.49 |
| 600577 | 2016 | -0.32 | 0.03 | 1.55572  | 2.4202654  | 22.31354 | 0.077765 | 21.8  |
| 2136   | 2016 | -0.39 | 0.03 | 1.55572  | 2.4202654  | 20.69152 | 0.086733 | 30.91 |
| 600237 | 2016 | -0.31 | 0.03 | 1.55572  | 2.4202654  | 21.48761 | -0.17453 | 16.76 |
| 600577 | 2016 | 0.603 | 0.03 | 1.55572  | 2.4202654  | 22.31354 | 0.077765 | 21.8  |
| 630    | 2016 | 0.276 | 0.03 | 1.55572  | 2.4202654  | 24.52086 | 0.018508 | 39.55 |
| 630    | 2016 | -0.49 | 0.03 | 1.55572  | 2.4202654  | 24.52086 | 0.018508 | 39.55 |
| 600470 | 2016 | -0.26 | 0.03 | 1.55572  | 2.4202654  | 22.48752 | -0.10779 | 25.49 |
| 600237 | 2016 | 0.619 | 0.03 | 1.55572  | 2.4202654  | 21.48761 | -0.17453 | 16.76 |
| 600237 | 2016 | 0.619 | 0.03 | 1.55572  | 2.4202654  | 21.48761 | -0.17453 | 16.76 |
| 630    | 2016 | 0.162 | 0.03 | 1.55572  | 2.4202654  | 24.52086 | 0.018508 | 39.55 |
| 2136   | 2016 | -0.44 | 0.03 | 1.55572  | 2.4202654  | 20.69152 | 0.086733 | 30.91 |
| 630    | 2016 | -0.26 | 0.03 | 1.55572  | 2.4202654  | 24.25519 | 0.018508 | 39.55 |
| 600577 | 2016 | 0.603 | 0.03 | 1.55572  | 2.4202654  | 22.31354 | 0.077765 | 21.8  |

|        |      |       |      |          |            |          |          |       |
|--------|------|-------|------|----------|------------|----------|----------|-------|
| 2136   | 2016 | -0.61 | 0.03 | 1.55572  | 2.4202654  | 20.69152 | 0.086733 | 30.91 |
| 2136   | 2016 | -0.61 | 0.03 | 1.55572  | 2.4202654  | 20.65499 | 0.086733 | 30.91 |
| 2136   | 2016 | -0.39 | 0.03 | 1.55572  | 2.4202654  | 20.69152 | 0.086733 | 30.91 |
| 600470 | 2016 | -0.26 | 0.03 | 1.55572  | 2.4202654  | 22.48752 | -0.10779 | 25.49 |
| 600577 | 2016 | -0.54 | 0.03 | 1.55572  | 2.4202654  | 21.68214 | 0.077765 | 21.8  |
| 630    | 2016 | 0.276 | 0.03 | 1.55572  | 2.4202654  | 24.52086 | 0.018508 | 39.55 |
| 600237 | 2016 | 0.233 | 0.03 | 1.55572  | 2.4202654  | 21.27525 | -0.17453 | 16.76 |
| 630    | 2016 | -0.82 | 0.03 | 1.55572  | 2.4202654  | 24.52086 | 0.018508 | 39.55 |
| 600577 | 2016 | 0.603 | 0.03 | 1.55572  | 2.4202654  | 22.31354 | 0.077765 | 21.8  |
| 600237 | 2016 | -0.31 | 0.03 | 1.55572  | 2.4202654  | 21.48761 | -0.17453 | 16.76 |
| 630    | 2016 | -0.82 | 0.03 | 1.55572  | 2.4202654  | 24.52086 | 0.018508 | 39.55 |
| 600577 | 2016 | 0.603 | 0.03 | 1.55572  | 2.4202654  | 22.31354 | 0.077765 | 21.8  |
| 630    | 2016 | 0.24  | 0.03 | 1.55572  | 2.4202654  | 24.52086 | 0.018508 | 39.55 |
| 600577 | 2016 | 0.603 | 0.03 | 1.55572  | 2.4202654  | 22.31354 | 0.077765 | 21.8  |
| 630    | 2016 | 0.24  | 0.03 | 1.55572  | 2.4202654  | 24.52086 | 0.018508 | 39.55 |
| 600577 | 2016 | 0.603 | 0.03 | 1.55572  | 2.4202654  | 22.31354 | 0.077765 | 21.8  |
| 600470 | 2016 | 0.381 | 0.03 | 1.55572  | 2.4202654  | 22.48752 | -0.10779 | 25.49 |
| 630    | 2016 | -0.16 | 0.03 | 1.55572  | 2.4202654  | 24.52086 | 0.018508 | 39.55 |
| 600577 | 2016 | 0.603 | 0.03 | 1.55572  | 2.4202654  | 22.31354 | 0.077765 | 21.8  |
| 600577 | 2016 | -0.32 | 0.03 | 1.55572  | 2.4202654  | 22.31354 | 0.077765 | 21.8  |
| 630    | 2016 | -0.2  | 0.03 | 1.55572  | 2.4202654  | 24.52086 | 0.018508 | 39.55 |
| 600470 | 2016 | 0.346 | 0.03 | 1.55572  | 2.4202654  | 22.09689 | -0.10779 | 25.49 |
| 630    | 2016 | -0.82 | 0.03 | 1.55572  | 2.4202654  | 24.52086 | 0.018508 | 39.55 |
| 600577 | 2016 | -0.19 | 0.03 | 1.55572  | 2.4202654  | 22.31354 | 0.077765 | 21.8  |
| 862    | 2016 | -0.71 | 0.01 | 1.024774 | 1.0501613  | 22.7936  | 0.006168 | 52.91 |
| 862    | 2016 | -0.71 | 0.01 | 1.024774 | 1.0501613  | 22.7936  | 0.006168 | 52.91 |
| 862    | 2016 | -0.28 | 0.01 | 1.024774 | 1.0501613  | 22.7936  | 0.006168 | 52.91 |
| 862    | 2016 | -0.46 | 0.01 | 1.024774 | 1.0501613  | 22.7936  | 0.006168 | 52.91 |
| 595    | 2016 | -0.28 | 0.01 | 1.024774 | 1.0501613  | 20.90606 | -0.12744 | 54.43 |
| 595    | 2016 | -0.34 | 0.01 | 1.024774 | 1.0501613  | 20.90606 | -0.12744 | 54.43 |
| 595    | 2016 | -0.45 | 0.01 | 1.024774 | 1.0501613  | 20.90606 | -0.12744 | 54.43 |
| 595    | 2016 | -0.28 | 0.01 | 1.024774 | 1.0501613  | 20.93762 | -0.12744 | 54.43 |
| 862    | 2016 | -0.59 | 0.01 | 1.024774 | 1.0501613  | 22.7936  | 0.006168 | 52.91 |
| 862    | 2016 | -0.71 | 0.01 | 1.024774 | 1.0501613  | 22.7936  | 0.006168 | 52.91 |
| 862    | 2016 | -0.59 | 0.01 | 1.024774 | 1.0501613  | 22.7936  | 0.006168 | 52.91 |
| 862    | 2016 | -0.71 | 0.01 | 1.024774 | 1.0501613  | 23.02736 | 0.006168 | 52.91 |
| 862    | 2016 | -0.28 | 0.01 | 1.024774 | 1.0501613  | 22.7936  | 0.006168 | 52.91 |
| 595    | 2016 | -0.28 | 0.01 | 1.024774 | 1.0501613  | 20.90606 | -0.12744 | 54.43 |
| 595    | 2016 | 0.712 | 0.01 | 1.024774 | 1.0501613  | 20.90606 | -0.12744 | 54.43 |
| 595    | 2016 | -0.28 | 0.01 | 1.024774 | 1.0501613  | 20.90606 | -0.12744 | 54.43 |
| 603399 | 2016 | -0.85 | 0    | 0.178066 | 0.03170745 | 21.82872 | 0.012138 | 21.14 |
| 603399 | 2016 | -0.85 | 0    | 0.178066 | 0.03170745 | 21.82872 | 0.012138 | 21.14 |
| 603399 | 2016 | -0.85 | 0    | 0.178066 | 0.03170745 | 21.82872 | 0.012138 | 21.14 |
| 603399 | 2016 | -0.85 | 0    | 0.178066 | 0.03170745 | 21.82872 | 0.012138 | 21.14 |
| 603399 | 2016 | -0.85 | 0    | 0.178066 | 0.03170745 | 21.8265  | 0.012138 | 21.14 |
| 910    | 2016 | -0.76 | 0.01 | 0.955805 | 0.91356294 | 22.50356 | 0.17638  | 47.52 |
| 2223   | 2016 | -0.05 | 0.01 | 0.955805 | 0.91356294 | 22.48241 | 0.101718 | 26.53 |
| 2077   | 2016 | -0.22 | 0.01 | 0.955805 | 0.91356294 | 22.65828 | 0.005078 | 48.97 |
| 2077   | 2016 | -0.14 | 0.01 | 0.955805 | 0.91356294 | 22.65828 | 0.005078 | 48.97 |
| 910    | 2016 | -0.76 | 0.01 | 0.955805 | 0.91356294 | 22.50356 | 0.17638  | 47.52 |
| 2223   | 2016 | -0.56 | 0.01 | 0.955805 | 0.91356294 | 22.48241 | 0.101718 | 26.53 |
| 2223   | 2016 | -0.25 | 0.01 | 0.955805 | 0.91356294 | 22.37527 | 0.101718 | 26.53 |
| 600305 | 2016 | 0.522 | 0.01 | 0.955805 | 0.91356294 | 21.54042 | 0.101575 | 44.63 |
| 910    | 2016 | -0.21 | 0.01 | 0.955805 | 0.91356294 | 22.50356 | 0.17638  | 47.52 |

|        |      |       |      |          |            |          |          |       |
|--------|------|-------|------|----------|------------|----------|----------|-------|
| 2104   | 2016 | 1.469 | 0.01 | 0.955805 | 0.91356294 | 21.43328 | 0.091805 | 20.17 |
| 910    | 2016 | -0.47 | 0.01 | 0.955805 | 0.91356294 | 22.50356 | 0.17638  | 47.52 |
| 300217 | 2016 | -0.65 | 0.01 | 0.955805 | 0.91356294 | 21.73018 | 0.022638 | 14.68 |
| 910    | 2016 | -0.57 | 0.01 | 0.955805 | 0.91356294 | 22.01104 | 0.17638  | 47.52 |
| 2223   | 2016 | -0.56 | 0.01 | 0.955805 | 0.91356294 | 22.48241 | 0.101718 | 26.53 |
| 600844 | 2016 | 0.007 | 0.01 | 0.955805 | 0.91356294 | 21.91996 | -0.10622 | 17.35 |
| 910    | 2016 | -0.76 | 0.01 | 0.955805 | 0.91356294 | 22.50356 | 0.17638  | 47.52 |
| 910    | 2016 | -0.76 | 0.01 | 0.955805 | 0.91356294 | 22.50356 | 0.17638  | 47.52 |
| 2104   | 2016 | 1.402 | 0.01 | 0.955805 | 0.91356294 | 21.43328 | 0.091805 | 20.17 |
| 600305 | 2016 | -0.38 | 0.01 | 0.955805 | 0.91356294 | 21.54042 | 0.101575 | 44.63 |
| 600844 | 2016 | 0.007 | 0.01 | 0.955805 | 0.91356294 | 21.91996 | -0.10622 | 17.35 |
| 910    | 2016 | 0.569 | 0.01 | 0.955805 | 0.91356294 | 22.50356 | 0.17638  | 47.52 |
| 2223   | 2016 | -0.56 | 0.01 | 0.955805 | 0.91356294 | 22.48241 | 0.101718 | 26.53 |
| 600844 | 2016 | 0.007 | 0.01 | 0.955805 | 0.91356294 | 21.91996 | -0.10622 | 17.35 |
| 600746 | 2016 | 0.366 | 0.01 | 0.955805 | 0.91356294 | 20.27226 | 0.049619 | 54.81 |
| 600305 | 2016 | -0.06 | 0.01 | 0.955805 | 0.91356294 | 21.54042 | 0.101575 | 44.63 |
| 2104   | 2016 | 1.469 | 0.01 | 0.955805 | 0.91356294 | 21.43328 | 0.091805 | 20.17 |
| 2223   | 2016 | -0.34 | 0.01 | 0.955805 | 0.91356294 | 22.48241 | 0.101718 | 26.53 |
| 910    | 2016 | -0.76 | 0.01 | 0.955805 | 0.91356294 | 22.50356 | 0.17638  | 47.52 |
| 910    | 2016 | -0.09 | 0.01 | 0.955805 | 0.91356294 | 22.50356 | 0.17638  | 47.52 |
| 2223   | 2016 | -0.56 | 0.01 | 0.955805 | 0.91356294 | 22.48241 | 0.101718 | 26.53 |
| 2077   | 2016 | -0.28 | 0.01 | 0.955805 | 0.91356294 | 22.65828 | 0.005078 | 48.97 |
| 600844 | 2016 | 0.007 | 0.01 | 0.955805 | 0.91356294 | 21.84558 | -0.10622 | 17.35 |
| 600305 | 2016 | 0.124 | 0.01 | 0.955805 | 0.91356294 | 21.54042 | 0.101575 | 44.63 |
| 2104   | 2016 | 1.398 | 0.01 | 0.955805 | 0.91356294 | 21.43328 | 0.091805 | 20.17 |
| 300217 | 2016 | -0.65 | 0.01 | 0.955805 | 0.91356294 | 21.47672 | 0.022638 | 14.68 |
| 910    | 2016 | -0.76 | 0.01 | 0.955805 | 0.91356294 | 22.50356 | 0.17638  | 47.52 |
| 300217 | 2016 | 0.281 | 0.01 | 0.955805 | 0.91356294 | 21.73018 | 0.022638 | 14.68 |
| 2223   | 2016 | -0.34 | 0.01 | 0.955805 | 0.91356294 | 22.48241 | 0.101718 | 26.53 |
| 910    | 2016 | -0.76 | 0.01 | 0.955805 | 0.91356294 | 22.50356 | 0.17638  | 47.52 |
| 300217 | 2016 | -0.65 | 0.01 | 0.955805 | 0.91356294 | 21.73018 | 0.022638 | 14.68 |
| 910    | 2016 | -0.04 | 0.01 | 0.955805 | 0.91356294 | 22.50356 | 0.17638  | 47.52 |
| 910    | 2016 | 0.072 | 0.01 | 0.955805 | 0.91356294 | 22.50356 | 0.17638  | 47.52 |
| 300217 | 2016 | -0.65 | 0.01 | 0.955805 | 0.91356294 | 21.73018 | 0.022638 | 14.68 |
| 910    | 2016 | 0.569 | 0.01 | 0.955805 | 0.91356294 | 22.50356 | 0.17638  | 47.52 |
| 300217 | 2016 | -0.04 | 0.01 | 0.955805 | 0.91356294 | 21.73018 | 0.022638 | 14.68 |
| 600746 | 2016 | 0.366 | 0.01 | 0.955805 | 0.91356294 | 20.27226 | 0.049619 | 54.81 |
| 2223   | 2016 | -0.56 | 0.01 | 0.955805 | 0.91356294 | 22.48241 | 0.101718 | 26.53 |
| 600305 | 2016 | 0.522 | 0.01 | 0.955805 | 0.91356294 | 21.54042 | 0.101575 | 44.63 |
| 2077   | 2016 | -0.22 | 0.01 | 0.955805 | 0.91356294 | 22.50659 | 0.005078 | 48.97 |
| 600844 | 2016 | 0.007 | 0.01 | 0.955805 | 0.91356294 | 21.91996 | -0.10622 | 17.35 |
| 600305 | 2016 | -0.8  | 0.01 | 0.955805 | 0.91356294 | 21.54042 | 0.101575 | 44.63 |
| 2077   | 2016 | -0.28 | 0.01 | 0.955805 | 0.91356294 | 22.65828 | 0.005078 | 48.97 |
| 2077   | 2016 | -0.21 | 0.01 | 0.955805 | 0.91356294 | 22.65828 | 0.005078 | 48.97 |
| 910    | 2016 | -0.76 | 0.01 | 0.955805 | 0.91356294 | 22.50356 | 0.17638  | 47.52 |
| 2104   | 2016 | 1.398 | 0.01 | 0.955805 | 0.91356294 | 21.43328 | 0.091805 | 20.17 |
| 2223   | 2016 | -0.02 | 0.01 | 0.955805 | 0.91356294 | 22.48241 | 0.101718 | 26.53 |
| 2223   | 2016 | -0.23 | 0.01 | 0.955805 | 0.91356294 | 22.48241 | 0.101718 | 26.53 |
| 2223   | 2016 | -0.2  | 0.01 | 0.955805 | 0.91356294 | 22.48241 | 0.101718 | 26.53 |
| 910    | 2016 | -0.76 | 0.01 | 0.955805 | 0.91356294 | 22.50356 | 0.17638  | 47.52 |
| 600305 | 2016 | -0.6  | 0.01 | 0.955805 | 0.91356294 | 21.54042 | 0.101575 | 44.63 |
| 600305 | 2016 | -0.06 | 0.01 | 0.955805 | 0.91356294 | 21.54042 | 0.101575 | 44.63 |
| 600305 | 2016 | 0.124 | 0.01 | 0.955805 | 0.91356294 | 21.54042 | 0.101575 | 44.63 |
| 2223   | 2016 | -0.56 | 0.01 | 0.955805 | 0.91356294 | 22.48241 | 0.101718 | 26.53 |

|        |      |       |      |          |            |          |          |        |
|--------|------|-------|------|----------|------------|----------|----------|--------|
| 300217 | 2016 | 0.281 | 0.01 | 0.955805 | 0.91356294 | 21.73018 | 0.022638 | 14.68  |
| 600746 | 2016 | 0.366 | 0.01 | 0.955805 | 0.91356294 | 20.27226 | 0.049619 | 54.81  |
| 910    | 2016 | -0.76 | 0.01 | 0.955805 | 0.91356294 | 22.50356 | 0.17638  | 47.52  |
| 600305 | 2016 | -0.06 | 0.01 | 0.955805 | 0.91356294 | 21.4669  | 0.101575 | 44.63  |
| 2223   | 2016 | -0.06 | 0.01 | 0.955805 | 0.91356294 | 22.48241 | 0.101718 | 26.53  |
| 910    | 2016 | -0.57 | 0.01 | 0.955805 | 0.91356294 | 22.50356 | 0.17638  | 47.52  |
| 910    | 2016 | -0.09 | 0.01 | 0.955805 | 0.91356294 | 22.50356 | 0.17638  | 47.52  |
| 2104   | 2016 | 1.469 | 0.01 | 0.955805 | 0.91356294 | 21.42114 | 0.091805 | 20.17  |
| 2223   | 2016 | -0.56 | 0.01 | 0.955805 | 0.91356294 | 22.48241 | 0.101718 | 26.53  |
| 600305 | 2016 | -0.06 | 0.01 | 0.955805 | 0.91356294 | 21.54042 | 0.101575 | 44.63  |
| 2077   | 2016 | 0.453 | 0.01 | 0.955805 | 0.91356294 | 22.65828 | 0.005078 | 48.97  |
| 600110 | 2016 | -0.73 | 0.1  | 0.693147 | 0.48045301 | 22.45983 | 0.022829 | 7.84   |
| 2338   | 2016 | 0.757 | 0.1  | 0.693147 | 0.48045301 | 20.69798 | 0.069542 | 42.65  |
| 2232   | 2016 | 0.127 | 0.1  | 0.693147 | 0.48045301 | 21.26642 | 0.044408 | 48.67  |
| 300396 | 2016 | 0.496 | 0.1  | 0.693147 | 0.48045301 | 21.11393 | 0.114473 | 53.8   |
| 600110 | 2016 | -0.73 | 0.1  | 0.693147 | 0.48045301 | 22.45983 | 0.022829 | 7.84   |
| 2232   | 2016 | 0.127 | 0.1  | 0.693147 | 0.48045301 | 21.26642 | 0.044408 | 48.67  |
| 30     | 2016 | -0.52 | 0.1  | 0.693147 | 0.48045301 | 22.63308 | 0.117164 | 24.41  |
| 600881 | 2016 | 0.345 | 0.1  | 0.693147 | 0.48045301 | 24.67219 | 0.006678 | 11.35  |
| 2232   | 2016 | 0.127 | 0.1  | 0.693147 | 0.48045301 | 21.26642 | 0.044408 | 48.67  |
| 661    | 2016 | 0.477 | 0.1  | 0.693147 | 0.48045301 | 22.54838 | 0.152101 | 22.36  |
| 2232   | 2016 | 0.127 | 0.1  | 0.693147 | 0.48045301 | 21.26642 | 0.044408 | 48.67  |
| 30     | 2016 | -0.52 | 0.1  | 0.693147 | 0.48045301 | 22.92857 | 0.117164 | 24.41  |
| 661    | 2016 | 0.592 | 0.1  | 0.693147 | 0.48045301 | 22.54838 | 0.152101 | 22.36  |
| 600148 | 2016 | -0.14 | 0.1  | 0.693147 | 0.48045301 | 20.22636 | 0.053512 | 32.07  |
| 875    | 2016 | -0.3  | 0.1  | 0.693147 | 0.48045301 | 23.66464 | 0.003143 | 16.21  |
| 600881 | 2016 | 0.345 | 0.1  | 0.693147 | 0.48045301 | 24.67219 | 0.006678 | 11.35  |
| 2232   | 2016 | 0.127 | 0.1  | 0.693147 | 0.48045301 | 21.17576 | 0.044408 | 48.67  |
| 2338   | 2016 | 0.537 | 0.1  | 0.693147 | 0.48045301 | 20.69798 | 0.069542 | 42.65  |
| 661    | 2016 | 0.994 | 0.1  | 0.693147 | 0.48045301 | 22.54838 | 0.152101 | 22.36  |
| 661    | 2016 | 0.592 | 0.1  | 0.693147 | 0.48045301 | 22.54838 | 0.152101 | 22.36  |
| 600110 | 2016 | -0.73 | 0.1  | 0.693147 | 0.48045301 | 22.45983 | 0.022829 | 7.84   |
| 600333 | 2016 | -0.66 | 0.1  | 0.693147 | 0.48045301 | 22.35819 | 0.036261 | 52.57  |
| 30     | 2016 | -0.52 | 0.1  | 0.693147 | 0.48045301 | 22.92857 | 0.117164 | 24.41  |
| 600110 | 2016 | -0.73 | 0.1  | 0.693147 | 0.48045301 | 22.11778 | 0.022829 | 7.84   |
| 300396 | 2016 | 0.437 | 0.1  | 0.693147 | 0.48045301 | 21.34296 | 0.114473 | 53.8   |
| 600881 | 2016 | 0.345 | 0.1  | 0.693147 | 0.48045301 | 24.67219 | 0.006678 | 11.35  |
| 600881 | 2016 | 0.345 | 0.1  | 0.693147 | 0.48045301 | 24.28605 | 0.006678 | 11.35  |
| 600333 | 2016 | -0.66 | 0.1  | 0.693147 | 0.48045301 | 22.35819 | 0.036261 | 52.57  |
| 600110 | 2016 | -0.73 | 0.1  | 0.693147 | 0.48045301 | 22.45983 | 0.022829 | 7.84   |
| 300396 | 2016 | 0.867 | 0.1  | 0.693147 | 0.48045301 | 21.34296 | 0.114473 | 53.8   |
| 30     | 2016 | -0.52 | 0.1  | 0.693147 | 0.48045301 | 22.92857 | 0.117164 | 24.41  |
| 2232   | 2016 | 0.127 | 0.1  | 0.693147 | 0.48045301 | 21.26642 | 0.044408 | 48.67  |
| 661    | 2016 | 0.477 | 0.1  | 0.693147 | 0.48045301 | 21.97184 | 0.152101 | 22.36  |
| 300396 | 2016 | 0.496 | 0.1  | 0.693147 | 0.48045301 | 21.34296 | 0.114473 | 53.8   |
| 2338   | 2016 | 0.225 | 0.1  | 0.693147 | 0.48045301 | 20.69798 | 0.069542 | 42.65  |
| 30     | 2016 | -0.52 | 0.1  | 0.693147 | 0.48045301 | 22.92857 | 0.117164 | 24.41  |
| 600189 | 2016 | -0.72 | 0.1  | 0.693147 | 0.48045301 | 22.1174  | 0.001787 | 42.569 |
| 600110 | 2016 | -0.73 | 0.1  | 0.693147 | 0.48045301 | 22.45983 | 0.022829 | 7.84   |
| 600189 | 2016 | -0.62 | 0.1  | 0.693147 | 0.48045301 | 22.11618 | 0.001787 | 42.569 |
| 600881 | 2016 | 0.345 | 0.1  | 0.693147 | 0.48045301 | 24.67219 | 0.006678 | 11.35  |
| 875    | 2016 | -0.3  | 0.1  | 0.693147 | 0.48045301 | 24.12691 | 0.003143 | 16.21  |
| 600148 | 2016 | -0.29 | 0.1  | 0.693147 | 0.48045301 | 20.67447 | 0.053512 | 32.07  |
| 2338   | 2016 | -0.04 | 0.1  | 0.693147 | 0.48045301 | 20.69798 | 0.069542 | 42.65  |

|        |      |       |      |          |            |          |          |        |
|--------|------|-------|------|----------|------------|----------|----------|--------|
| 600148 | 2016 | -0.05 | 0.1  | 0.693147 | 0.48045301 | 20.67447 | 0.053512 | 32.07  |
| 600110 | 2016 | -0.73 | 0.1  | 0.693147 | 0.48045301 | 22.45983 | 0.022829 | 7.84   |
| 600148 | 2016 | -0.05 | 0.1  | 0.693147 | 0.48045301 | 20.67447 | 0.053512 | 32.07  |
| 600148 | 2016 | -0.29 | 0.1  | 0.693147 | 0.48045301 | 20.67447 | 0.053512 | 32.07  |
| 661    | 2016 | 0.332 | 0.1  | 0.693147 | 0.48045301 | 22.54838 | 0.152101 | 22.36  |
| 600881 | 2016 | -0.15 | 0.1  | 0.693147 | 0.48045301 | 24.67219 | 0.006678 | 11.35  |
| 600881 | 2016 | 0.345 | 0.1  | 0.693147 | 0.48045301 | 24.67219 | 0.006678 | 11.35  |
| 30     | 2016 | -0.68 | 0.1  | 0.693147 | 0.48045301 | 22.92857 | 0.117164 | 24.41  |
| 600881 | 2016 | 0.345 | 0.1  | 0.693147 | 0.48045301 | 24.67219 | 0.006678 | 11.35  |
| 600881 | 2016 | 0.345 | 0.1  | 0.693147 | 0.48045301 | 24.67219 | 0.006678 | 11.35  |
| 661    | 2016 | 0.32  | 0.1  | 0.693147 | 0.48045301 | 22.54838 | 0.152101 | 22.36  |
| 600189 | 2016 | -0.29 | 0.1  | 0.693147 | 0.48045301 | 22.1174  | 0.001787 | 42.569 |
| 600881 | 2016 | 0.345 | 0.1  | 0.693147 | 0.48045301 | 24.67219 | 0.006678 | 11.35  |
| 2338   | 2016 | 1.056 | 0.1  | 0.693147 | 0.48045301 | 20.69798 | 0.069542 | 42.65  |
| 30     | 2016 | -0.68 | 0.1  | 0.693147 | 0.48045301 | 22.92857 | 0.13593  | 24.41  |
| 600881 | 2016 | -0.98 | 0.1  | 0.693147 | 0.48045301 | 24.67219 | 0.006678 | 11.35  |
| 2338   | 2016 | 0.954 | 0.1  | 0.693147 | 0.48045301 | 20.69798 | 0.069542 | 42.65  |
| 2338   | 2016 | 0.755 | 0.1  | 0.693147 | 0.48045301 | 20.69798 | 0.069542 | 42.65  |
| 30     | 2016 | -0.59 | 0.1  | 0.693147 | 0.48045301 | 22.92857 | 0.117164 | 24.41  |
| 600881 | 2016 | -0.98 | 0.1  | 0.693147 | 0.48045301 | 24.67219 | 0.006678 | 11.35  |
| 300396 | 2016 | 0.821 | 0.1  | 0.693147 | 0.48045301 | 21.11393 | 0.114473 | 53.8   |
| 30     | 2016 | -0.52 | 0.1  | 0.693147 | 0.48045301 | 22.92857 | 0.117164 | 24.41  |
| 30     | 2016 | -0.68 | 0.1  | 0.693147 | 0.48045301 | 22.92857 | 0.117164 | 24.41  |
| 875    | 2016 | -0.3  | 0.1  | 0.693147 | 0.48045301 | 24.12691 | 0.003143 | 16.21  |
| 600189 | 2016 | -0.72 | 0.1  | 0.693147 | 0.48045301 | 22.1174  | 0.001787 | 42.569 |
| 30     | 2016 | -0.48 | 0.1  | 0.693147 | 0.48045301 | 22.92857 | 0.117164 | 24.41  |
| 30     | 2016 | -0.48 | 0.1  | 0.693147 | 0.48045301 | 22.92857 | 0.117164 | 24.41  |
| 300396 | 2016 | 1.002 | 0.1  | 0.693147 | 0.48045301 | 21.34296 | 0.114473 | 53.8   |
| 30     | 2016 | -0.68 | 0.1  | 0.693147 | 0.48045301 | 22.92857 | 0.117164 | 24.41  |
| 30     | 2016 | -0.52 | 0.1  | 0.693147 | 0.48045301 | 22.92857 | 0.117164 | 24.41  |
| 600333 | 2016 | -0.66 | 0.1  | 0.693147 | 0.48045301 | 22.29807 | 0.036261 | 52.57  |
| 600110 | 2016 | -0.73 | 0.1  | 0.693147 | 0.48045301 | 22.45983 | 0.022829 | 7.84   |
| 30     | 2016 | -0.63 | 0.1  | 0.693147 | 0.48045301 | 22.92857 | 0.117164 | 24.41  |
| 600189 | 2016 | -0.29 | 0.1  | 0.693147 | 0.48045301 | 22.11618 | 0.001787 | 42.569 |
| 600110 | 2016 | -0.73 | 0.1  | 0.693147 | 0.48045301 | 22.45983 | 0.022829 | 7.84   |
| 661    | 2016 | 0.307 | 0.1  | 0.693147 | 0.48045301 | 22.54838 | 0.152101 | 22.36  |
| 30     | 2016 | -0.61 | 0.1  | 0.693147 | 0.48045301 | 22.92857 | 0.117164 | 24.41  |
| 2338   | 2016 | 0.755 | 0.1  | 0.693147 | 0.48045301 | 20.69798 | 0.069542 | 42.65  |
| 2232   | 2016 | 0.127 | 0.1  | 0.693147 | 0.48045301 | 21.26642 | 0.044408 | 48.67  |
| 2338   | 2016 | 0.919 | 0.1  | 0.693147 | 0.48045301 | 20.51267 | 0.069542 | 42.65  |
| 600881 | 2016 | 0.345 | 0.1  | 0.693147 | 0.48045301 | 24.67219 | 0.006678 | 11.35  |
| 661    | 2016 | 0.592 | 0.1  | 0.693147 | 0.48045301 | 22.54838 | 0.152101 | 22.36  |
| 2338   | 2016 | 1.056 | 0.1  | 0.693147 | 0.48045301 | 20.69798 | 0.069542 | 42.65  |
| 600881 | 2016 | -0.15 | 0.1  | 0.693147 | 0.48045301 | 24.67219 | 0.006678 | 11.35  |
| 600881 | 2016 | 0.345 | 0.1  | 0.693147 | 0.48045301 | 24.67219 | 0.006678 | 11.35  |
| 300433 | 2016 | -0.15 | 0.04 | 0.983319 | 0.9669168  | 23.89334 | 0.085589 | 74.18  |
| 300267 | 2016 | 0.372 | 0.04 | 0.983319 | 0.9669168  | 22.4158  | 0.155927 | 45.74  |
| 600156 | 2016 | -0.18 | 0.04 | 0.983319 | 0.9669168  | 20.87024 | -0.01045 | 40.31  |
| 600156 | 2016 | -0.18 | 0.04 | 0.983319 | 0.9669168  | 20.87024 | -0.01045 | 40.31  |
| 300298 | 2016 | -0.09 | 0.04 | 0.983319 | 0.9669168  | 21.11091 | 0.089602 | 33.68  |
| 600744 | 2016 | -0.07 | 0.04 | 0.983319 | 0.9669168  | 23.68276 | 0.043801 | 34.18  |
| 603998 | 2016 | 0.053 | 0.04 | 0.983319 | 0.9669168  | 20.96307 | 0.074957 | 36.31  |
| 2452   | 2016 | -0.64 | 0.04 | 0.983319 | 0.9669168  | 21.76963 | 0.091461 | 17.96  |
| 603998 | 2016 | 0.269 | 0.04 | 0.983319 | 0.9669168  | 20.96307 | 0.074957 | 36.31  |

|        |      |       |      |          |           |          |          |       |
|--------|------|-------|------|----------|-----------|----------|----------|-------|
| 603998 | 2016 | 0.269 | 0.04 | 0.983319 | 0.9669168 | 20.96307 | 0.074957 | 36.31 |
| 603998 | 2016 | 0.269 | 0.04 | 0.983319 | 0.9669168 | 20.96307 | 0.074957 | 36.31 |
| 300267 | 2016 | 0.424 | 0.04 | 0.983319 | 0.9669168 | 22.4158  | 0.155927 | 45.74 |
| 998    | 2016 | 1.104 | 0.04 | 0.983319 | 0.9669168 | 22.79553 | 0.086884 | 11.49 |
| 2452   | 2016 | -0.27 | 0.04 | 0.983319 | 0.9669168 | 21.76963 | 0.091461 | 17.96 |
| 603998 | 2016 | 0.269 | 0.04 | 0.983319 | 0.9669168 | 20.96307 | 0.074957 | 36.31 |
| 2650   | 2016 | 0.202 | 0.04 | 0.983319 | 0.9669168 | 21.77079 | 0.076936 | 18.79 |
| 2397   | 2016 | -0.62 | 0.04 | 0.983319 | 0.9669168 | 21.63755 | 0.065111 | 37.41 |
| 300490 | 2016 | 0.542 | 0.04 | 0.983319 | 0.9669168 | 20.59293 | 0.08814  | 46.74 |
| 157    | 2016 | 0.899 | 0.04 | 0.983319 | 0.9669168 | 25.1116  | -0.02394 | 18.08 |
| 2397   | 2016 | -0.62 | 0.04 | 0.983319 | 0.9669168 | 21.63755 | 0.065111 | 37.41 |
| 300433 | 2016 | -0.09 | 0.04 | 0.983319 | 0.9669168 | 23.89334 | 0.085589 | 74.18 |
| 989    | 2016 | 0.165 | 0.04 | 0.983319 | 0.9669168 | 22.29142 | 0.157577 | 42.33 |
| 600390 | 2016 | 0.207 | 0.04 | 0.983319 | 0.9669168 | 24.24943 | 0.121103 | 27.84 |
| 989    | 2016 | -0.08 | 0.04 | 0.983319 | 0.9669168 | 22.29142 | 0.157577 | 42.33 |
| 932    | 2016 | -0.02 | 0.04 | 0.983319 | 0.9669168 | 24.98518 | -0.16704 | 59.91 |
| 600476 | 2016 | 0.647 | 0.04 | 0.983319 | 0.9669168 | 20.10336 | 0.011567 | 32.98 |
| 600390 | 2016 | 0.207 | 0.04 | 0.983319 | 0.9669168 | 24.24943 | 0.121103 | 27.84 |
| 600476 | 2016 | 0.647 | 0.04 | 0.983319 | 0.9669168 | 20.10336 | 0.011567 | 32.98 |
| 300187 | 2016 | 0.083 | 0.04 | 0.983319 | 0.9669168 | 21.82051 | 0.110203 | 62.55 |
| 600156 | 2016 | -0.18 | 0.04 | 0.983319 | 0.9669168 | 20.87024 | -0.01045 | 40.31 |
| 157    | 2016 | -0.09 | 0.04 | 0.983319 | 0.9669168 | 25.21349 | -0.02394 | 18.08 |
| 300433 | 2016 | 0.054 | 0.04 | 0.983319 | 0.9669168 | 23.89334 | 0.085589 | 74.18 |
| 2397   | 2016 | -0.62 | 0.04 | 0.983319 | 0.9669168 | 21.6143  | 0.065111 | 37.41 |
| 2452   | 2016 | -0.37 | 0.04 | 0.983319 | 0.9669168 | 21.76963 | 0.091461 | 17.96 |
| 600744 | 2016 | -0.75 | 0.04 | 0.983319 | 0.9669168 | 23.68276 | 0.043801 | 34.18 |
| 300358 | 2016 | 0.048 | 0.04 | 0.983319 | 0.9669168 | 21.79183 | 0.072658 | 49.66 |
| 2097   | 2016 | -0.18 | 0.04 | 0.983319 | 0.9669168 | 23.04295 | 0.029926 | 26.69 |
| 2452   | 2016 | -0.01 | 0.04 | 0.983319 | 0.9669168 | 21.76963 | 0.091461 | 17.96 |
| 600744 | 2016 | -0.93 | 0.04 | 0.983319 | 0.9669168 | 23.68276 | 0.043801 | 34.18 |
| 300267 | 2016 | 0.699 | 0.04 | 0.983319 | 0.9669168 | 22.4158  | 0.155927 | 45.74 |
| 600731 | 2016 | 0.599 | 0.04 | 0.983319 | 0.9669168 | 21.322   | 0.035871 | 22.91 |
| 900    | 2016 | 0.331 | 0.04 | 0.983319 | 0.9669168 | 23.81506 | 0.104779 | 27.19 |
| 2650   | 2016 | 0.202 | 0.04 | 0.983319 | 0.9669168 | 21.7115  | 0.076936 | 18.79 |
| 2452   | 2016 | 0.002 | 0.04 | 0.983319 | 0.9669168 | 21.47866 | 0.091461 | 17.96 |
| 300433 | 2016 | 0.005 | 0.04 | 0.983319 | 0.9669168 | 23.89334 | 0.085589 | 74.18 |
| 989    | 2016 | -0    | 0.04 | 0.983319 | 0.9669168 | 22.29142 | 0.157577 | 42.33 |
| 2452   | 2016 | -0.55 | 0.04 | 0.983319 | 0.9669168 | 21.76963 | 0.091461 | 17.96 |
| 2097   | 2016 | -0.03 | 0.04 | 0.983319 | 0.9669168 | 23.04295 | 0.029926 | 26.69 |
| 300338 | 2016 | 0.295 | 0.04 | 0.983319 | 0.9669168 | 20.68704 | 0.005096 | 25.89 |
| 989    | 2016 | 0.341 | 0.04 | 0.983319 | 0.9669168 | 22.29142 | 0.157577 | 42.33 |
| 603998 | 2016 | 0.053 | 0.04 | 0.983319 | 0.9669168 | 20.96307 | 0.074957 | 36.31 |
| 600390 | 2016 | 0.241 | 0.04 | 0.983319 | 0.9669168 | 24.24943 | 0.121103 | 27.84 |
| 600156 | 2016 | -0.18 | 0.04 | 0.983319 | 0.9669168 | 20.87024 | -0.01045 | 40.31 |
| 600744 | 2016 | -0.95 | 0.04 | 0.983319 | 0.9669168 | 23.68276 | 0.043801 | 34.18 |
| 300338 | 2016 | 0.295 | 0.04 | 0.983319 | 0.9669168 | 20.72818 | 0.005096 | 25.89 |
| 300267 | 2016 | 0.699 | 0.04 | 0.983319 | 0.9669168 | 22.4158  | 0.155927 | 45.74 |
| 600478 | 2016 | 0.061 | 0.04 | 0.983319 | 0.9669168 | 22.37723 | -0.11372 | 17.69 |
| 300298 | 2016 | -0.09 | 0.04 | 0.983319 | 0.9669168 | 21.11091 | 0.089602 | 33.68 |
| 2533   | 2016 | -0.07 | 0.04 | 0.983319 | 0.9669168 | 21.45446 | 0.070986 | 20.83 |
| 157    | 2016 | 0.464 | 0.04 | 0.983319 | 0.9669168 | 25.21349 | -0.02394 | 18.08 |
| 300298 | 2016 | -0.09 | 0.04 | 0.983319 | 0.9669168 | 21.11511 | 0.089602 | 33.68 |
| 300433 | 2016 | 0.03  | 0.04 | 0.983319 | 0.9669168 | 23.65377 | 0.085589 | 74.18 |
| 600975 | 2016 | 0.5   | 0.04 | 0.983319 | 0.9669168 | 21.17657 | 0.133764 | 31.72 |

|        |      |       |      |          |           |          |          |       |
|--------|------|-------|------|----------|-----------|----------|----------|-------|
| 989    | 2016 | 0.606 | 0.04 | 0.983319 | 0.9669168 | 22.29142 | 0.157577 | 42.33 |
| 932    | 2016 | -0.39 | 0.04 | 0.983319 | 0.9669168 | 24.98518 | -0.16704 | 59.91 |
| 300187 | 2016 | 0.083 | 0.04 | 0.983319 | 0.9669168 | 21.82051 | 0.110203 | 62.55 |
| 2397   | 2016 | -0.62 | 0.04 | 0.983319 | 0.9669168 | 21.63755 | 0.065111 | 37.41 |
| 2533   | 2016 | -0.24 | 0.04 | 0.983319 | 0.9669168 | 21.86319 | 0.070986 | 20.83 |
| 300433 | 2016 | -0.34 | 0.04 | 0.983319 | 0.9669168 | 23.89334 | 0.085589 | 74.18 |
| 2097   | 2016 | -0.2  | 0.04 | 0.983319 | 0.9669168 | 23.04295 | 0.029926 | 26.69 |
| 600478 | 2016 | 0.061 | 0.04 | 0.983319 | 0.9669168 | 22.37723 | -0.11372 | 17.69 |
| 300187 | 2016 | 0.083 | 0.04 | 0.983319 | 0.9669168 | 21.82051 | 0.110203 | 62.55 |
| 2397   | 2016 | -0.62 | 0.04 | 0.983319 | 0.9669168 | 21.63755 | 0.065111 | 37.41 |
| 900    | 2016 | -0.78 | 0.04 | 0.983319 | 0.9669168 | 23.81506 | 0.104779 | 27.19 |
| 932    | 2016 | 0.045 | 0.04 | 0.983319 | 0.9669168 | 24.98518 | -0.16704 | 59.91 |
| 300338 | 2016 | 0.289 | 0.04 | 0.983319 | 0.9669168 | 20.68704 | 0.005096 | 25.89 |
| 2397   | 2016 | -0.62 | 0.04 | 0.983319 | 0.9669168 | 21.63755 | 0.065111 | 37.41 |
| 2533   | 2016 | -0.07 | 0.04 | 0.983319 | 0.9669168 | 21.86319 | 0.070986 | 20.83 |
| 998    | 2016 | 1.104 | 0.04 | 0.983319 | 0.9669168 | 22.79553 | 0.086884 | 11.49 |
| 600478 | 2016 | -0.32 | 0.04 | 0.983319 | 0.9669168 | 22.37723 | -0.11372 | 17.69 |
| 932    | 2016 | 0.31  | 0.04 | 0.983319 | 0.9669168 | 23.00367 | -0.16704 | 59.91 |
| 300345 | 2016 | 0.895 | 0.04 | 0.983319 | 0.9669168 | 20.81994 | 0.011259 | 20.55 |
| 2452   | 2016 | -0.29 | 0.04 | 0.983319 | 0.9669168 | 21.76963 | 0.091461 | 17.96 |
| 2452   | 2016 | -0.47 | 0.04 | 0.983319 | 0.9669168 | 21.76963 | 0.091461 | 17.96 |
| 600744 | 2016 | -0.95 | 0.04 | 0.983319 | 0.9669168 | 23.68276 | 0.043801 | 34.18 |
| 2452   | 2016 | -0.27 | 0.04 | 0.983319 | 0.9669168 | 21.76963 | 0.091461 | 17.96 |
| 300490 | 2016 | 0.542 | 0.04 | 0.983319 | 0.9669168 | 20.63183 | 0.08814  | 46.74 |
| 300267 | 2016 | 0.23  | 0.04 | 0.983319 | 0.9669168 | 22.4158  | 0.155927 | 45.74 |
| 2297   | 2016 | 0.916 | 0.04 | 0.983319 | 0.9669168 | 21.5938  | 0.00559  | 15.38 |
| 600731 | 2016 | 0.484 | 0.04 | 0.983319 | 0.9669168 | 21.322   | 0.035871 | 22.91 |
| 600476 | 2016 | 0.647 | 0.04 | 0.983319 | 0.9669168 | 20.10336 | 0.011567 | 32.98 |
| 600744 | 2016 | -0.73 | 0.04 | 0.983319 | 0.9669168 | 23.68276 | 0.043801 | 34.18 |
| 600744 | 2016 | -0.62 | 0.04 | 0.983319 | 0.9669168 | 23.68276 | 0.043801 | 34.18 |
| 2650   | 2016 | 0.202 | 0.04 | 0.983319 | 0.9669168 | 21.77079 | 0.076936 | 18.79 |
| 2097   | 2016 | -0    | 0.04 | 0.983319 | 0.9669168 | 23.04295 | 0.029926 | 26.69 |
| 300338 | 2016 | -0.17 | 0.04 | 0.983319 | 0.9669168 | 20.68704 | 0.005096 | 25.89 |
| 600390 | 2016 | 0.378 | 0.04 | 0.983319 | 0.9669168 | 23.51168 | 0.121103 | 27.84 |
| 989    | 2016 | 0.606 | 0.04 | 0.983319 | 0.9669168 | 22.29142 | 0.157577 | 42.33 |
| 2297   | 2016 | 0.916 | 0.04 | 0.983319 | 0.9669168 | 21.5938  | 0.00559  | 15.38 |
| 300358 | 2016 | 0.139 | 0.04 | 0.983319 | 0.9669168 | 21.64797 | 0.072658 | 49.66 |
| 600731 | 2016 | 0.21  | 0.04 | 0.983319 | 0.9669168 | 21.322   | 0.035871 | 22.91 |
| 600390 | 2016 | 0.378 | 0.04 | 0.983319 | 0.9669168 | 24.24943 | 0.121103 | 27.84 |
| 932    | 2016 | 0.045 | 0.04 | 0.983319 | 0.9669168 | 24.98518 | -0.16704 | 59.91 |
| 932    | 2016 | -0.61 | 0.04 | 0.983319 | 0.9669168 | 24.98518 | -0.16704 | 59.91 |
| 300345 | 2016 | 0.012 | 0.04 | 0.983319 | 0.9669168 | 20.81994 | 0.011259 | 20.55 |
| 932    | 2016 | 0.717 | 0.04 | 0.983319 | 0.9669168 | 24.98518 | -0.16704 | 59.91 |
| 300267 | 2016 | 0.035 | 0.04 | 0.983319 | 0.9669168 | 22.4158  | 0.155927 | 45.74 |
| 300358 | 2016 | 0.085 | 0.04 | 0.983319 | 0.9669168 | 21.79183 | 0.072658 | 49.66 |
| 157    | 2016 | 0.899 | 0.04 | 0.983319 | 0.9669168 | 25.21349 | -0.02394 | 18.08 |
| 2533   | 2016 | -0.57 | 0.04 | 0.983319 | 0.9669168 | 21.86319 | 0.070986 | 20.83 |
| 300267 | 2016 | 0.372 | 0.04 | 0.983319 | 0.9669168 | 22.4158  | 0.155927 | 45.74 |
| 600975 | 2016 | 0.5   | 0.04 | 0.983319 | 0.9669168 | 21.3729  | 0.133764 | 31.72 |
| 2533   | 2016 | -0.07 | 0.04 | 0.983319 | 0.9669168 | 21.86319 | 0.070986 | 20.83 |
| 300267 | 2016 | -0.27 | 0.04 | 0.983319 | 0.9669168 | 22.4158  | 0.155927 | 45.74 |
| 157    | 2016 | 0.464 | 0.04 | 0.983319 | 0.9669168 | 25.21349 | -0.02394 | 18.08 |
| 600744 | 2016 | -0.69 | 0.04 | 0.983319 | 0.9669168 | 23.68276 | 0.043801 | 34.18 |
| 600478 | 2016 | 0.361 | 0.04 | 0.983319 | 0.9669168 | 22.37723 | -0.11372 | 17.69 |



|        |      |       |      |          |           |          |          |       |
|--------|------|-------|------|----------|-----------|----------|----------|-------|
| 998    | 2016 | 1.104 | 0.04 | 0.983319 | 0.9669168 | 22.79553 | 0.086884 | 11.49 |
| 300338 | 2016 | 0.295 | 0.04 | 0.983319 | 0.9669168 | 20.68704 | 0.005096 | 25.89 |
| 998    | 2016 | 1.104 | 0.04 | 0.983319 | 0.9669168 | 22.79553 | 0.086884 | 11.49 |
| 600156 | 2016 | -0.18 | 0.04 | 0.983319 | 0.9669168 | 20.87024 | -0.01045 | 40.31 |
| 600156 | 2016 | -0.18 | 0.04 | 0.983319 | 0.9669168 | 20.87024 | -0.01045 | 40.31 |
| 998    | 2016 | 1.104 | 0.04 | 0.983319 | 0.9669168 | 22.79553 | 0.086884 | 11.49 |
| 300298 | 2016 | -0.09 | 0.04 | 0.983319 | 0.9669168 | 21.11091 | 0.089602 | 33.68 |
| 600156 | 2016 | -0.18 | 0.04 | 0.983319 | 0.9669168 | 20.10336 | -0.01045 | 40.31 |
| 300187 | 2016 | 0.083 | 0.04 | 0.983319 | 0.9669168 | 21.82051 | 0.110203 | 62.55 |
| 998    | 2016 | 1.104 | 0.04 | 0.983319 | 0.9669168 | 22.79553 | 0.086884 | 11.49 |
| 157    | 2016 | 0.065 | 0.04 | 0.983319 | 0.9669168 | 25.21349 | -0.02394 | 18.08 |
| 157    | 2016 | 0.065 | 0.04 | 0.983319 | 0.9669168 | 25.21349 | -0.02394 | 18.08 |
| 989    | 2016 | 0.606 | 0.04 | 0.983319 | 0.9669168 | 22.88742 | 0.157577 | 42.33 |
| 2533   | 2016 | -0.13 | 0.04 | 0.983319 | 0.9669168 | 21.86319 | 0.070986 | 20.83 |
| 600731 | 2016 | 0.599 | 0.04 | 0.983319 | 0.9669168 | 21.322   | 0.035871 | 22.91 |
| 300345 | 2016 | 0.655 | 0.04 | 0.983319 | 0.9669168 | 20.81994 | 0.011259 | 20.55 |
| 2297   | 2016 | 0.916 | 0.04 | 0.983319 | 0.9669168 | 21.5938  | 0.00559  | 15.38 |
| 157    | 2016 | 0.237 | 0.04 | 0.983319 | 0.9669168 | 25.21349 | -0.02394 | 18.08 |
| 600478 | 2016 | -0.23 | 0.04 | 0.983319 | 0.9669168 | 21.7948  | -0.11372 | 17.69 |
| 2097   | 2016 | -0.03 | 0.04 | 0.983319 | 0.9669168 | 23.04295 | 0.029926 | 26.69 |
| 300187 | 2016 | 0.083 | 0.04 | 0.983319 | 0.9669168 | 21.57805 | 0.110203 | 62.55 |
| 603998 | 2016 | 0.593 | 0.04 | 0.983319 | 0.9669168 | 20.96307 | 0.074957 | 36.31 |
| 600478 | 2016 | -0.32 | 0.04 | 0.983319 | 0.9669168 | 22.37723 | -0.11372 | 17.69 |
| 157    | 2016 | 0.464 | 0.04 | 0.983319 | 0.9669168 | 25.21349 | 0.005569 | 18.08 |
| 157    | 2016 | 0.899 | 0.04 | 0.983319 | 0.9669168 | 25.21349 | -0.02394 | 18.08 |
| 600744 | 2016 | -0.95 | 0.04 | 0.983319 | 0.9669168 | 23.68276 | 0.043801 | 34.18 |
| 157    | 2016 | -0.17 | 0.04 | 0.983319 | 0.9669168 | 25.21349 | -0.02394 | 18.08 |
| 600478 | 2016 | 0.061 | 0.04 | 0.983319 | 0.9669168 | 22.37723 | -0.11372 | 17.69 |
| 600731 | 2016 | -0.03 | 0.04 | 0.983319 | 0.9669168 | 21.322   | 0.035871 | 22.91 |
| 600731 | 2016 | 0.652 | 0.04 | 0.983319 | 0.9669168 | 21.322   | 0.035871 | 22.91 |
| 300338 | 2016 | 0.295 | 0.04 | 0.983319 | 0.9669168 | 20.68704 | 0.005096 | 25.89 |
| 600744 | 2016 | -0.95 | 0.04 | 0.983319 | 0.9669168 | 23.68276 | 0.043801 | 34.18 |
| 2533   | 2016 | 0.123 | 0.04 | 0.983319 | 0.9669168 | 21.86319 | 0.070986 | 20.83 |
| 600975 | 2016 | 0.5   | 0.04 | 0.983319 | 0.9669168 | 21.3729  | 0.133764 | 31.72 |
| 603998 | 2016 | 0.593 | 0.04 | 0.983319 | 0.9669168 | 20.88861 | 0.074957 | 36.31 |
| 600478 | 2016 | 0.061 | 0.04 | 0.983319 | 0.9669168 | 22.37723 | -0.11372 | 17.69 |
| 2297   | 2016 | 0.916 | 0.04 | 0.983319 | 0.9669168 | 21.5938  | 0.00559  | 15.38 |
| 600731 | 2016 | 0.652 | 0.04 | 0.983319 | 0.9669168 | 20.89721 | 0.035871 | 22.91 |
| 157    | 2016 | 0.069 | 0.04 | 0.983319 | 0.9669168 | 25.21349 | -0.02394 | 18.08 |
| 600478 | 2016 | 0.061 | 0.04 | 0.983319 | 0.9669168 | 22.37723 | -0.11372 | 17.69 |
| 157    | 2016 | 0.899 | 0.04 | 0.983319 | 0.9669168 | 25.21349 | -0.02394 | 18.08 |
| 2533   | 2016 | -0.07 | 0.04 | 0.983319 | 0.9669168 | 21.86319 | 0.070986 | 20.83 |
| 300267 | 2016 | 0.699 | 0.04 | 0.983319 | 0.9669168 | 22.13756 | 0.155927 | 45.74 |
| 932    | 2016 | -0.02 | 0.04 | 0.983319 | 0.9669168 | 24.98518 | -0.16704 | 59.91 |
| 300358 | 2016 | 0.139 | 0.04 | 0.983319 | 0.9669168 | 21.64797 | 0.072658 | 49.66 |
| 600744 | 2016 | -0.95 | 0.04 | 0.983319 | 0.9669168 | 23.68276 | 0.043801 | 34.18 |
| 2297   | 2016 | 0.916 | 0.04 | 0.983319 | 0.9669168 | 21.5938  | 0.00559  | 15.38 |
| 989    | 2016 | -0.33 | 0.04 | 0.983319 | 0.9669168 | 22.29142 | 0.157577 | 42.33 |
| 900    | 2016 | 0.331 | 0.04 | 0.983319 | 0.9669168 | 23.81506 | 0.104779 | 27.19 |
| 2650   | 2016 | 0.202 | 0.04 | 0.983319 | 0.9669168 | 21.77079 | 0.076936 | 18.79 |
| 989    | 2016 | 0.341 | 0.04 | 0.983319 | 0.9669168 | 22.29142 | 0.157577 | 42.33 |
| 300433 | 2016 | 0.005 | 0.04 | 0.983319 | 0.9669168 | 23.89334 | 0.085589 | 74.18 |
| 2650   | 2016 | 0.202 | 0.04 | 0.983319 | 0.9669168 | 21.77079 | 0.076936 | 18.79 |
| 600744 | 2016 | -0.95 | 0.04 | 0.983319 | 0.9669168 | 23.68276 | 0.043801 | 34.18 |

|        |      |       |      |          |            |          |          |       |
|--------|------|-------|------|----------|------------|----------|----------|-------|
| 2097   | 2016 | -0.18 | 0.04 | 0.983319 | 0.9669168  | 23.04295 | 0.029926 | 26.69 |
| 600731 | 2016 | 0.576 | 0.04 | 0.983319 | 0.9669168  | 21.322   | 0.035871 | 22.91 |
| 300338 | 2016 | -0.17 | 0.04 | 0.983319 | 0.9669168  | 20.68704 | 0.005096 | 25.89 |
| 157    | 2016 | 0.899 | 0.04 | 0.983319 | 0.9669168  | 25.21349 | -0.02394 | 18.08 |
| 2097   | 2016 | -0.18 | 0.04 | 0.983319 | 0.9669168  | 22.766   | 0.029926 | 26.69 |
| 2297   | 2016 | 0.916 | 0.04 | 0.983319 | 0.9669168  | 21.35201 | 0.00559  | 15.38 |
| 2297   | 2016 | 0.916 | 0.04 | 0.983319 | 0.9669168  | 21.5938  | 0.00559  | 15.38 |
| 998    | 2016 | 1.104 | 0.04 | 0.983319 | 0.9669168  | 22.79244 | 0.086884 | 11.49 |
| 2097   | 2016 | -0.18 | 0.04 | 0.983319 | 0.9669168  | 23.04295 | 0.029926 | 26.69 |
| 998    | 2016 | 1.104 | 0.04 | 0.983319 | 0.9669168  | 22.79553 | 0.086884 | 11.49 |
| 600744 | 2016 | -0.95 | 0.04 | 0.983319 | 0.9669168  | 23.68276 | 0.043801 | 34.18 |
| 989    | 2016 | 0.186 | 0.04 | 0.983319 | 0.9669168  | 22.29142 | 0.157577 | 42.33 |
| 2452   | 2016 | -0.64 | 0.04 | 0.983319 | 0.9669168  | 21.76963 | 0.091461 | 17.96 |
| 2533   | 2016 | -0.07 | 0.04 | 0.983319 | 0.9669168  | 21.86319 | 0.070986 | 20.83 |
| 600731 | 2016 | 0.21  | 0.04 | 0.983319 | 0.9669168  | 21.322   | 0.035871 | 22.91 |
| 900    | 2016 | -0.78 | 0.04 | 0.983319 | 0.9669168  | 23.69988 | 0.104779 | 27.19 |
| 2452   | 2016 | -0.47 | 0.04 | 0.983319 | 0.9669168  | 21.76963 | 0.091461 | 17.96 |
| 2452   | 2016 | -0.26 | 0.04 | 0.983319 | 0.9669168  | 21.76963 | 0.091461 | 17.96 |
| 300433 | 2016 | -0.09 | 0.04 | 0.983319 | 0.9669168  | 23.89334 | 0.085589 | 74.18 |
| 600390 | 2016 | 0.241 | 0.04 | 0.983319 | 0.9669168  | 24.24943 | 0.121103 | 27.84 |
| 600731 | 2016 | 0.599 | 0.04 | 0.983319 | 0.9669168  | 21.322   | 0.035871 | 22.91 |
| 2097   | 2016 | -0.2  | 0.04 | 0.983319 | 0.9669168  | 23.04295 | 0.029926 | 26.69 |
| 300490 | 2016 | 0.542 | 0.04 | 0.983319 | 0.9669168  | 20.63183 | 0.08814  | 46.74 |
| 600975 | 2016 | 0.5   | 0.04 | 0.983319 | 0.9669168  | 21.3729  | 0.133764 | 31.72 |
| 157    | 2016 | 0.899 | 0.04 | 0.983319 | 0.9669168  | 25.21349 | -0.02394 | 18.08 |
| 2297   | 2016 | 0.916 | 0.04 | 0.983319 | 0.9669168  | 21.5938  | 0.00559  | 15.38 |
| 157    | 2016 | 0.464 | 0.04 | 0.983319 | 0.9669168  | 25.21349 | -0.02394 | 18.08 |
| 300358 | 2016 | 0.048 | 0.04 | 0.983319 | 0.9669168  | 21.64797 | 0.072658 | 49.66 |
| 300345 | 2016 | 0.012 | 0.04 | 0.983319 | 0.9669168  | 20.81994 | 0.011259 | 20.55 |
| 600744 | 2016 | -0.75 | 0.04 | 0.983319 | 0.9669168  | 23.68276 | 0.043801 | 34.18 |
| 2097   | 2016 | -0    | 0.04 | 0.983319 | 0.9669168  | 23.04295 | 0.029926 | 26.69 |
| 600731 | 2016 | 0.599 | 0.04 | 0.983319 | 0.9669168  | 21.322   | 0.035871 | 22.91 |
| 157    | 2016 | 0.213 | 0.04 | 0.983319 | 0.9669168  | 25.21349 | -0.02394 | 18.08 |
| 2097   | 2016 | -0.18 | 0.04 | 0.983319 | 0.9669168  | 23.04295 | 0.029926 | 26.69 |
| 300345 | 2016 | 0.895 | 0.04 | 0.983319 | 0.9669168  | 20.74327 | 0.011259 | 20.55 |
| 900    | 2016 | -0.62 | 0.04 | 0.983319 | 0.9669168  | 23.81506 | 0.104779 | 27.19 |
| 600478 | 2016 | -0.32 | 0.04 | 0.983319 | 0.9669168  | 22.37723 | -0.11372 | 17.69 |
| 600744 | 2016 | -0.95 | 0.04 | 0.983319 | 0.9669168  | 23.45618 | 0.043801 | 34.18 |
| 600975 | 2016 | 0.5   | 0.04 | 0.983319 | 0.9669168  | 21.3729  | 0.133764 | 31.72 |
| 300338 | 2016 | 0.295 | 0.04 | 0.983319 | 0.9669168  | 20.68704 | 0.005096 | 25.89 |
| 300187 | 2016 | 0.083 | 0.04 | 0.983319 | 0.9669168  | 21.82051 | 0.110203 | 62.55 |
| 601699 | 2016 | -0.55 | 0    | 0.050103 | 0.00251027 | 24.78066 | 0.03949  | 61.03 |
| 601699 | 2016 | -0.42 | 0    | 0.050103 | 0.00251027 | 24.78066 | 0.03949  | 61.03 |
| 300158 | 2016 | 0.525 | 0    | 0.050103 | 0.00251027 | 22.65112 | 0.036636 | 43.79 |
| 601699 | 2016 | -0.78 | 0    | 0.050103 | 0.00251027 | 24.78066 | 0.03949  | 61.03 |
| 300158 | 2016 | -0.36 | 0    | 0.050103 | 0.00251027 | 22.65112 | 0.036636 | 43.79 |
| 300158 | 2016 | -0.61 | 0    | 0.050103 | 0.00251027 | 22.65112 | 0.036636 | 43.79 |
| 601699 | 2016 | -0.42 | 0    | 0.050103 | 0.00251027 | 24.78066 | 0.03949  | 61.03 |
| 300158 | 2016 | -0.21 | 0    | 0.050103 | 0.00251027 | 22.65112 | 0.036636 | 43.79 |
| 300158 | 2016 | 0.525 | 0    | 0.050103 | 0.00251027 | 22.51599 | 0.036636 | 43.79 |
| 300158 | 2016 | -0.8  | 0    | 0.050103 | 0.00251027 | 22.65112 | 0.036636 | 43.79 |
| 300158 | 2016 | 0.525 | 0    | 0.050103 | 0.00251027 | 22.65112 | 0.036636 | 43.79 |
| 601699 | 2016 | -0.55 | 0    | 0.050103 | 0.00251027 | 24.78066 | 0.03949  | 61.03 |
| 601699 | 2016 | -0.78 | 0    | 0.050103 | 0.00251027 | 24.53489 | 0.03949  | 61.03 |

|        |      |       |      |          |            |          |          |       |
|--------|------|-------|------|----------|------------|----------|----------|-------|
| 300158 | 2016 | -0.29 | 0    | 0.050103 | 0.00251027 | 22.65112 | 0.036636 | 43.79 |
| 601699 | 2016 | -0.55 | 0    | 0.050103 | 0.00251027 | 24.78066 | 0.03949  | 61.03 |
| 300158 | 2016 | 0.525 | 0    | 0.050103 | 0.00251027 | 22.65112 | 0.036636 | 43.79 |
| 300158 | 2016 | 0.525 | 0    | 0.050103 | 0.00251027 | 22.65112 | 0.036636 | 43.79 |
| 300158 | 2016 | 0.525 | 0    | 0.050103 | 0.00251027 | 22.65112 | 0.036636 | 43.79 |
| 300473 | 2016 | -0.26 | 0    | 0.178066 | 0.03170745 | 21.39848 | 0.07399  | 37.26 |
| 300473 | 2016 | -0.17 | 0    | 0.178066 | 0.03170745 | 21.39848 | 0.07399  | 37.26 |
| 2487   | 2016 | -0.21 | 0    | 0.178066 | 0.03170745 | 21.66907 | 0.04192  | 47.41 |
| 2487   | 2016 | -0.21 | 0    | 0.178066 | 0.03170745 | 21.66907 | 0.04192  | 47.41 |
| 2487   | 2016 | -0.21 | 0    | 0.178066 | 0.03170745 | 21.66907 | 0.04192  | 47.41 |
| 2487   | 2016 | -0.21 | 0    | 0.178066 | 0.03170745 | 21.66907 | 0.04192  | 47.41 |
| 300473 | 2016 | -0.45 | 0    | 0.178066 | 0.03170745 | 21.39848 | 0.07399  | 37.26 |
| 300473 | 2016 | -0.45 | 0    | 0.178066 | 0.03170745 | 21.39848 | 0.07399  | 37.26 |
| 300473 | 2016 | -0.17 | 0    | 0.178066 | 0.03170745 | 21.39848 | 0.07399  | 37.26 |
| 2487   | 2016 | -0.21 | 0    | 0.178066 | 0.03170745 | 21.50998 | 0.04192  | 47.41 |
| 300473 | 2016 | -0.45 | 0    | 0.178066 | 0.03170745 | 21.39848 | 0.07399  | 37.26 |
| 300473 | 2016 | -0.45 | 0    | 0.178066 | 0.03170745 | 21.40286 | 0.07399  | 37.26 |
| 600199 | 2016 | -0.48 | 0.03 | 0.510826 | 0.26094302 | 21.90866 | 0.007812 | 32.07 |
| 600199 | 2016 | -0.6  | 0.03 | 0.510826 | 0.26094302 | 21.90866 | 0.007812 | 32.07 |
| 600199 | 2016 | -0.6  | 0.03 | 0.510826 | 0.26094302 | 21.84769 | 0.007812 | 32.07 |
| 600199 | 2016 | -0.48 | 0.03 | 0.510826 | 0.26094302 | 21.90866 | 0.007812 | 32.07 |
| 600199 | 2016 | -0.54 | 0.03 | 0.510826 | 0.26094302 | 21.90866 | 0.007812 | 32.07 |
| 600328 | 2016 | -0.6  | 0.01 | 0.112502 | 0.0126568  | 22.57852 | 0.054257 | 33.08 |
| 600328 | 2016 | -0.6  | 0.01 | 0.112502 | 0.0126568  | 22.57852 | 0.054257 | 33.08 |
| 600328 | 2016 | -0.6  | 0.01 | 0.112502 | 0.0126568  | 22.57852 | 0.054257 | 33.08 |
| 600328 | 2016 | -0.6  | 0.01 | 0.112502 | 0.0126568  | 22.57852 | 0.054257 | 33.08 |
| 600328 | 2016 | -0.6  | 0.01 | 0.112502 | 0.0126568  | 21.83643 | 0.054257 | 33.08 |
| 2497   | 2016 | -0.57 | 0.01 | 0.235741 | 0.05557367 | 21.89888 | 0.057052 | 14.7  |
| 2497   | 2016 | -0.57 | 0.01 | 0.235741 | 0.05557367 | 21.89888 | 0.057052 | 14.7  |
| 2497   | 2016 | 0.309 | 0.01 | 0.235741 | 0.05557367 | 21.89888 | 0.057052 | 14.7  |
| 2497   | 2016 | 0.75  | 0.01 | 0.235741 | 0.05557367 | 21.89888 | 0.057052 | 14.7  |
| 2497   | 2016 | 0.309 | 0.01 | 0.235741 | 0.05557367 | 21.89888 | 0.057052 | 14.7  |
| 2497   | 2016 | -0.3  | 0.01 | 0.235741 | 0.05557367 | 21.89888 | 0.057052 | 14.7  |
| 2497   | 2016 | -0.04 | 0.01 | 0.235741 | 0.05557367 | 21.89888 | 0.057052 | 14.7  |
| 2497   | 2016 | -0.24 | 0.01 | 0.235741 | 0.05557367 | 21.89888 | 0.057052 | 14.7  |
| 2497   | 2016 | -0.49 | 0.01 | 0.235741 | 0.05557367 | 21.89888 | 0.057052 | 14.7  |
| 2497   | 2016 | -0.13 | 0.01 | 0.235741 | 0.05557367 | 21.89888 | 0.057052 | 14.7  |
| 2497   | 2016 | -0.24 | 0.01 | 0.235741 | 0.05557367 | 21.89888 | 0.057052 | 14.7  |
| 2497   | 2016 | -0.04 | 0.01 | 0.235741 | 0.05557367 | 21.89888 | 0.057052 | 14.7  |
| 2497   | 2016 | -0.39 | 0.01 | 0.235741 | 0.05557367 | 21.89888 | 0.057052 | 14.7  |
| 2497   | 2016 | 0.088 | 0.01 | 0.235741 | 0.05557367 | 21.69857 | 0.057052 | 14.7  |
| 2497   | 2016 | -0.25 | 0.01 | 0.235741 | 0.05557367 | 21.89888 | 0.057052 | 14.7  |
| 300001 | 2016 | -0.44 | 0    | 0.324862 | 0.10553548 | 23.186   | 0.065754 | 44    |
| 600060 | 2016 | 0.225 | 0    | 0.324862 | 0.10553548 | 23.84525 | 0.131453 | 39.35 |
| 2498   | 2016 | 0.065 | 0    | 0.324862 | 0.10553548 | 22.58532 | 0.093874 | 66.56 |
| 2073   | 2016 | 0.011 | 0    | 0.324862 | 0.10553548 | 22.83254 | -0.16188 | 15.42 |
| 600690 | 2016 | 0.308 | 0    | 0.324862 | 0.10553548 | 25.60041 | 0.178054 | 20.64 |
| 2537   | 2016 | -0.14 | 0    | 0.324862 | 0.10553548 | 23.37971 | 0.038655 | 22.54 |
| 300183 | 2016 | 2.023 | 0    | 0.324862 | 0.10553548 | 21.74892 | 0.138845 | 23.06 |
| 2545   | 2016 | -0.07 | 0    | 0.324862 | 0.10553548 | 23.10272 | 0.019899 | 46.92 |
| 2073   | 2016 | 0.709 | 0    | 0.324862 | 0.10553548 | 22.83254 | -0.16188 | 15.42 |
| 2537   | 2016 | -0.31 | 0    | 0.324862 | 0.10553548 | 23.37971 | 0.038655 | 22.54 |
| 2498   | 2016 | -0.47 | 0    | 0.324862 | 0.10553548 | 22.58532 | 0.093874 | 66.56 |
| 600690 | 2016 | 0.159 | 0    | 0.324862 | 0.10553548 | 25.60041 | 0.178054 | 20.64 |

|        |      |       |   |          |            |          |          |       |
|--------|------|-------|---|----------|------------|----------|----------|-------|
| 600060 | 2016 | 0.664 | 0 | 0.324862 | 0.10553548 | 23.84525 | 0.131453 | 39.35 |
| 2537   | 2016 | 0.752 | 0 | 0.324862 | 0.10553548 | 23.37971 | 0.038655 | 22.54 |
| 300183 | 2016 | 1.981 | 0 | 0.324862 | 0.10553548 | 21.74892 | 0.138845 | 23.06 |
| 300183 | 2016 | 2.023 | 0 | 0.324862 | 0.10553548 | 21.68497 | 0.138845 | 23.06 |
| 600060 | 2016 | 0.641 | 0 | 0.324862 | 0.10553548 | 23.74289 | 0.131453 | 39.35 |
| 300183 | 2016 | 1.825 | 0 | 0.324862 | 0.10553548 | 21.74892 | 0.138845 | 23.06 |
| 600579 | 2016 | 1.05  | 0 | 0.324862 | 0.10553548 | 21.19485 | 0.005217 | 51.56 |
| 2768   | 2016 | 0.677 | 0 | 0.324862 | 0.10553548 | 21.21752 | 0.148821 | 52.5  |
| 600690 | 2016 | 0.026 | 0 | 0.324862 | 0.10553548 | 25.60041 | 0.178054 | 20.64 |
| 2094   | 2016 | -0.03 | 0 | 0.324862 | 0.10553548 | 21.78255 | 0.103638 | 23.06 |
| 2498   | 2016 | -0.6  | 0 | 0.324862 | 0.10553548 | 22.58532 | 0.093874 | 66.56 |
| 600579 | 2016 | 0.479 | 0 | 0.324862 | 0.10553548 | 21.19485 | 0.005217 | 51.56 |
| 300001 | 2016 | -0.1  | 0 | 0.324862 | 0.10553548 | 23.186   | 0.065754 | 44    |
| 600690 | 2016 | 0.271 | 0 | 0.324862 | 0.10553548 | 25.60041 | 0.178054 | 20.64 |
| 600690 | 2016 | 0.689 | 0 | 0.324862 | 0.10553548 | 25.60041 | 0.178054 | 20.64 |
| 2537   | 2016 | 0.314 | 0 | 0.324862 | 0.10553548 | 23.37971 | 0.038655 | 22.54 |
| 600690 | 2016 | 0.689 | 0 | 0.324862 | 0.10553548 | 25.60041 | 0.178054 | 20.64 |
| 599    | 2016 | -0.3  | 0 | 0.324862 | 0.10553548 | 22.70404 | 0.028858 | 23.38 |
| 600336 | 2016 | -0.71 | 0 | 0.324862 | 0.10553548 | 22.14876 | 0.012056 | 39.07 |
| 600690 | 2016 | 0.689 | 0 | 0.324862 | 0.10553548 | 25.60041 | 0.178054 | 20.64 |
| 599    | 2016 | -0.19 | 0 | 0.324862 | 0.10553548 | 22.08246 | 0.028858 | 23.38 |
| 600690 | 2016 | -0.34 | 0 | 0.324862 | 0.10553548 | 24.31301 | 0.178054 | 20.64 |
| 600690 | 2016 | 0.621 | 0 | 0.324862 | 0.10553548 | 25.60041 | 0.178054 | 20.64 |
| 2498   | 2016 | -0.5  | 0 | 0.324862 | 0.10553548 | 22.58532 | 0.093874 | 66.56 |
| 2073   | 2016 | 0.709 | 0 | 0.324862 | 0.10553548 | 22.83254 | -0.16188 | 15.42 |
| 300183 | 2016 | 1.434 | 0 | 0.324862 | 0.10553548 | 21.74892 | 0.138845 | 23.06 |
| 601058 | 2016 | -0.55 | 0 | 0.324862 | 0.10553548 | 23.28109 | 0.081566 | 7.84  |
| 600690 | 2016 | -0.45 | 0 | 0.324862 | 0.10553548 | 25.60041 | 0.178054 | 20.64 |
| 300110 | 2016 | -0.07 | 0 | 0.324862 | 0.10553548 | 21.7257  | 0.014684 | 16.76 |
| 2498   | 2016 | -0.45 | 0 | 0.324862 | 0.10553548 | 22.53507 | 0.093874 | 66.56 |
| 2537   | 2016 | 0.314 | 0 | 0.324862 | 0.10553548 | 22.63529 | 0.038655 | 22.54 |
| 600600 | 2016 | -0.42 | 0 | 0.324862 | 0.10553548 | 24.12703 | 0.065507 | 30.83 |
| 300001 | 2016 | -0.44 | 0 | 0.324862 | 0.10553548 | 23.186   | 0.065754 | 44    |
| 600690 | 2016 | 0.026 | 0 | 0.324862 | 0.10553548 | 25.60041 | 0.178054 | 20.64 |
| 300110 | 2016 | -0.46 | 0 | 0.324862 | 0.10553548 | 21.74653 | 0.014684 | 16.76 |
| 600690 | 2016 | -0.42 | 0 | 0.324862 | 0.10553548 | 25.60041 | 0.178054 | 20.64 |
| 300183 | 2016 | 1.434 | 0 | 0.324862 | 0.10553548 | 21.74892 | 0.138845 | 23.06 |
| 600060 | 2016 | 0.664 | 0 | 0.324862 | 0.10553548 | 23.84525 | 0.131453 | 39.35 |
| 599    | 2016 | -0.3  | 0 | 0.324862 | 0.10553548 | 22.08246 | 0.028858 | 23.38 |
| 600336 | 2016 | 0.024 | 0 | 0.324862 | 0.10553548 | 22.14876 | 0.012056 | 39.07 |
| 2537   | 2016 | 0.752 | 0 | 0.324862 | 0.10553548 | 23.37971 | 0.038655 | 22.54 |
| 600690 | 2016 | -0.64 | 0 | 0.324862 | 0.10553548 | 25.60041 | 0.178054 | 20.64 |
| 600336 | 2016 | -0.58 | 0 | 0.324862 | 0.10553548 | 22.14876 | 0.012056 | 39.07 |
| 300001 | 2016 | -0.2  | 0 | 0.324862 | 0.10553548 | 23.186   | 0.065754 | 44    |
| 2768   | 2016 | -0.01 | 0 | 0.324862 | 0.10553548 | 21.21752 | 0.148821 | 52.5  |
| 2073   | 2016 | 0.673 | 0 | 0.324862 | 0.10553548 | 22.83254 | -0.16188 | 15.42 |
| 600690 | 2016 | 0.327 | 0 | 0.324862 | 0.10553548 | 25.60041 | 0.178054 | 20.64 |
| 600336 | 2016 | -0.71 | 0 | 0.324862 | 0.10553548 | 22.14876 | 0.012056 | 39.07 |
| 300110 | 2016 | 0.017 | 0 | 0.324862 | 0.10553548 | 21.7257  | 0.014684 | 16.76 |
| 2537   | 2016 | -0.57 | 0 | 0.324862 | 0.10553548 | 23.37971 | 0.038655 | 22.54 |
| 300110 | 2016 | -0.07 | 0 | 0.324862 | 0.10553548 | 21.7257  | 0.014684 | 16.76 |
| 2094   | 2016 | 0.415 | 0 | 0.324862 | 0.10553548 | 21.78255 | 0.103638 | 23.06 |
| 600690 | 2016 | 0.045 | 0 | 0.324862 | 0.10553548 | 25.60041 | 0.178054 | 20.64 |
| 300001 | 2016 | -0.12 | 0 | 0.324862 | 0.10553548 | 23.186   | 0.065754 | 44    |

|        |      |       |   |          |            |          |          |       |
|--------|------|-------|---|----------|------------|----------|----------|-------|
| 600690 | 2016 | 0.159 | 0 | 0.324862 | 0.10553548 | 25.60041 | 0.178054 | 20.64 |
| 600579 | 2016 | 0.785 | 0 | 0.324862 | 0.10553548 | 21.19485 | 0.005217 | 51.56 |
| 600690 | 2016 | -0.53 | 0 | 0.324862 | 0.10553548 | 25.60041 | 0.178054 | 20.64 |
| 2545   | 2016 | -0.41 | 0 | 0.324862 | 0.10553548 | 23.10272 | 0.019899 | 46.92 |
| 600690 | 2016 | -0.08 | 0 | 0.324862 | 0.10553548 | 25.60041 | 0.178054 | 20.64 |
| 600690 | 2016 | -0.57 | 0 | 0.324862 | 0.10553548 | 25.60041 | 0.178054 | 20.64 |
| 2094   | 2016 | -0.79 | 0 | 0.324862 | 0.10553548 | 21.78255 | 0.103638 | 23.06 |
| 300001 | 2016 | -0.63 | 0 | 0.324862 | 0.10553548 | 23.186   | 0.065754 | 44    |
| 300001 | 2016 | -0.63 | 0 | 0.324862 | 0.10553548 | 23.186   | 0.065754 | 44    |
| 2498   | 2016 | -0.5  | 0 | 0.324862 | 0.10553548 | 22.58532 | 0.093874 | 66.56 |
| 2545   | 2016 | -0.27 | 0 | 0.324862 | 0.10553548 | 23.10272 | 0.019899 | 46.92 |
| 599    | 2016 | -0.73 | 0 | 0.324862 | 0.10553548 | 22.08246 | 0.028858 | 23.38 |
| 2094   | 2016 | 0.415 | 0 | 0.324862 | 0.10553548 | 21.78255 | 0.103638 | 23.06 |
| 600060 | 2016 | 0.225 | 0 | 0.324862 | 0.10553548 | 23.84525 | 0.131453 | 39.35 |
| 600336 | 2016 | -0.71 | 0 | 0.324862 | 0.10553548 | 22.14876 | 0.012056 | 39.07 |
| 2073   | 2016 | 0.011 | 0 | 0.324862 | 0.10553548 | 22.83254 | -0.16188 | 15.42 |
| 2498   | 2016 | -0.6  | 0 | 0.324862 | 0.10553548 | 22.58532 | 0.093874 | 66.56 |
| 2073   | 2016 | 0.709 | 0 | 0.324862 | 0.10553548 | 22.83254 | -0.16188 | 15.42 |
| 601058 | 2016 | -0.82 | 0 | 0.324862 | 0.10553548 | 23.28109 | 0.081566 | 7.84  |
| 2545   | 2016 | -0.41 | 0 | 0.324862 | 0.10553548 | 23.10272 | 0.019899 | 46.92 |
| 2073   | 2016 | 0.48  | 0 | 0.324862 | 0.10553548 | 22.83254 | -0.16188 | 15.42 |
| 600690 | 2016 | -0.36 | 0 | 0.324862 | 0.10553548 | 25.60041 | 0.178054 | 20.64 |
| 300183 | 2016 | 1.763 | 0 | 0.324862 | 0.10553548 | 21.74892 | 0.138845 | 23.06 |
| 300183 | 2016 | 1.494 | 0 | 0.324862 | 0.10553548 | 21.74892 | 0.138845 | 23.06 |
| 601058 | 2016 | -0.55 | 0 | 0.324862 | 0.10553548 | 23.28109 | 0.081566 | 7.84  |
| 600336 | 2016 | -0.71 | 0 | 0.324862 | 0.10553548 | 22.14876 | 0.012056 | 39.07 |
| 600690 | 2016 | -0.29 | 0 | 0.324862 | 0.10553548 | 25.60041 | 0.178054 | 20.64 |
| 2073   | 2016 | 0.445 | 0 | 0.324862 | 0.10553548 | 22.83254 | -0.16188 | 15.42 |
| 2545   | 2016 | -0.41 | 0 | 0.324862 | 0.10553548 | 23.10272 | 0.019899 | 46.92 |
| 2537   | 2016 | -0.31 | 0 | 0.324862 | 0.10553548 | 23.37971 | 0.038655 | 22.54 |
| 2073   | 2016 | 0.011 | 0 | 0.324862 | 0.10553548 | 22.83254 | -0.16188 | 15.42 |
| 600579 | 2016 | 0.785 | 0 | 0.324862 | 0.10553548 | 20.80923 | 0.005217 | 51.56 |
| 600060 | 2016 | 0.218 | 0 | 0.324862 | 0.10553548 | 23.84525 | 0.131453 | 39.35 |
| 300001 | 2016 | -0.44 | 0 | 0.324862 | 0.10553548 | 23.186   | 0.065754 | 44    |
| 600690 | 2016 | 0.138 | 0 | 0.324862 | 0.10553548 | 25.60041 | 0.178054 | 20.64 |
| 2073   | 2016 | 0.587 | 0 | 0.324862 | 0.10553548 | 22.83254 | -0.16188 | 15.42 |
| 599    | 2016 | -0.41 | 0 | 0.324862 | 0.10553548 | 22.08246 | 0.028858 | 23.38 |
| 300001 | 2016 | -0.2  | 0 | 0.324862 | 0.10553548 | 22.76646 | 0.065754 | 44    |
| 600060 | 2016 | 0.634 | 0 | 0.324862 | 0.10553548 | 23.84525 | 0.131453 | 39.35 |
| 600336 | 2016 | -0.71 | 0 | 0.324862 | 0.10553548 | 22.14876 | 0.012056 | 39.07 |
| 600336 | 2016 | -0.71 | 0 | 0.324862 | 0.10553548 | 22.14876 | 0.012056 | 39.07 |
| 600690 | 2016 | 0.019 | 0 | 0.324862 | 0.10553548 | 25.60041 | 0.178054 | 20.64 |
| 2094   | 2016 | -0.03 | 0 | 0.324862 | 0.10553548 | 21.78255 | 0.103638 | 23.06 |
| 2537   | 2016 | -0.31 | 0 | 0.324862 | 0.10553548 | 23.37971 | 0.038655 | 22.54 |
| 600600 | 2016 | -0.42 | 0 | 0.324862 | 0.10553548 | 23.74471 | 0.065507 | 30.83 |
| 300001 | 2016 | -0.26 | 0 | 0.324862 | 0.10553548 | 23.186   | 0.065754 | 44    |
| 300110 | 2016 | 0.056 | 0 | 0.324862 | 0.10553548 | 21.7257  | 0.014684 | 16.76 |
| 601058 | 2016 | -0.55 | 0 | 0.324862 | 0.10553548 | 23.28109 | 0.081566 | 7.84  |
| 600336 | 2016 | -0.71 | 0 | 0.324862 | 0.10553548 | 22.14876 | 0.012056 | 39.07 |
| 2498   | 2016 | -0.6  | 0 | 0.324862 | 0.10553548 | 22.58532 | 0.093874 | 66.56 |
| 600600 | 2016 | -0.42 | 0 | 0.324862 | 0.10553548 | 24.12703 | 0.065507 | 30.83 |
| 600600 | 2016 | -0.42 | 0 | 0.324862 | 0.10553548 | 24.12703 | 0.065507 | 30.83 |
| 300183 | 2016 | 1.494 | 0 | 0.324862 | 0.10553548 | 21.74892 | 0.138845 | 23.06 |
| 2545   | 2016 | -0.41 | 0 | 0.324862 | 0.10553548 | 23.10272 | 0.019899 | 46.92 |

|        |      |       |   |          |            |          |          |       |
|--------|------|-------|---|----------|------------|----------|----------|-------|
| 600690 | 2016 | 0.689 | 0 | 0.324862 | 0.10553548 | 25.60041 | 0.178054 | 20.64 |
| 599    | 2016 | -0.44 | 0 | 0.324862 | 0.10553548 | 22.08246 | 0.028858 | 23.38 |
| 2498   | 2016 | 0.065 | 0 | 0.324862 | 0.10553548 | 22.58532 | 0.093874 | 66.56 |
| 600336 | 2016 | -0.71 | 0 | 0.324862 | 0.10553548 | 22.14876 | 0.012056 | 39.07 |
| 600336 | 2016 | -0.71 | 0 | 0.324862 | 0.10553548 | 22.14876 | 0.012056 | 39.07 |
| 600060 | 2016 | 0.677 | 0 | 0.324862 | 0.10553548 | 23.84525 | 0.131453 | 39.35 |
| 2545   | 2016 | -0.41 | 0 | 0.324862 | 0.10553548 | 23.10272 | 0.019899 | 46.92 |
| 600690 | 2016 | -0.64 | 0 | 0.324862 | 0.10553548 | 25.60041 | 0.178054 | 20.64 |
| 600690 | 2016 | -0.08 | 0 | 0.324862 | 0.10553548 | 25.60041 | 0.178054 | 20.64 |
| 600600 | 2016 | -0.42 | 0 | 0.324862 | 0.10553548 | 24.12703 | 0.065507 | 30.83 |
| 2768   | 2016 | 0.162 | 0 | 0.324862 | 0.10553548 | 21.12654 | 0.148821 | 52.5  |
| 600690 | 2016 | 0.327 | 0 | 0.324862 | 0.10553548 | 25.60041 | 0.178054 | 20.64 |
| 600690 | 2016 | -0.64 | 0 | 0.324862 | 0.10553548 | 25.60041 | 0.178054 | 20.64 |
| 600690 | 2016 | 0.31  | 0 | 0.324862 | 0.10553548 | 25.60041 | 0.178054 | 20.64 |
| 600690 | 2016 | 0.234 | 0 | 0.324862 | 0.10553548 | 25.60041 | 0.178054 | 20.64 |
| 600690 | 2016 | -0.29 | 0 | 0.324862 | 0.10553548 | 25.60041 | 0.178054 | 20.64 |
| 600690 | 2016 | -0.33 | 0 | 0.324862 | 0.10553548 | 25.60041 | 0.178054 | 20.64 |
| 600690 | 2016 | 0.019 | 0 | 0.324862 | 0.10553548 | 25.60041 | 0.178054 | 20.64 |
| 600336 | 2016 | -0.71 | 0 | 0.324862 | 0.10553548 | 22.14876 | 0.012056 | 39.07 |
| 600690 | 2016 | 0.159 | 0 | 0.324862 | 0.10553548 | 25.60041 | 0.178054 | 20.64 |
| 600336 | 2016 | -0.35 | 0 | 0.324862 | 0.10553548 | 22.14876 | 0.012056 | 39.07 |
| 2537   | 2016 | -0.31 | 0 | 0.324862 | 0.10553548 | 23.37971 | 0.038655 | 22.54 |
| 600060 | 2016 | 0.677 | 0 | 0.324862 | 0.10553548 | 23.84525 | 0.131453 | 39.35 |
| 599    | 2016 | -0.32 | 0 | 0.324862 | 0.10553548 | 22.08246 | 0.028858 | 23.38 |
| 600060 | 2016 | 0.432 | 0 | 0.324862 | 0.10553548 | 23.84525 | 0.131453 | 39.35 |
| 600336 | 2016 | -0.17 | 0 | 0.324862 | 0.10553548 | 22.14876 | 0.012056 | 39.07 |
| 300001 | 2016 | -0.44 | 0 | 0.324862 | 0.10553548 | 23.186   | 0.065754 | 44    |
| 2094   | 2016 | -0.79 | 0 | 0.324862 | 0.10553548 | 21.78255 | 0.103638 | 23.06 |
| 600690 | 2016 | -0.31 | 0 | 0.324862 | 0.10553548 | 25.60041 | 0.178054 | 20.64 |
| 600690 | 2016 | 0.166 | 0 | 0.324862 | 0.10553548 | 25.60041 | 0.178054 | 20.64 |
| 2768   | 2016 | 0.677 | 0 | 0.324862 | 0.10553548 | 21.21752 | 0.148821 | 52.5  |
| 300110 | 2016 | -0.32 | 0 | 0.324862 | 0.10553548 | 21.7257  | 0.014684 | 16.76 |
| 599    | 2016 | -0.3  | 0 | 0.324862 | 0.10553548 | 22.08246 | 0.028858 | 23.38 |
| 600579 | 2016 | 0.658 | 0 | 0.324862 | 0.10553548 | 21.19485 | 0.005217 | 51.56 |
| 600690 | 2016 | 0.086 | 0 | 0.324862 | 0.10553548 | 25.60041 | 0.178054 | 20.64 |
| 600690 | 2016 | -0.64 | 0 | 0.324862 | 0.10553548 | 25.60041 | 0.178054 | 20.64 |
| 600690 | 2016 | -0.64 | 0 | 0.324862 | 0.10553548 | 25.60041 | 0.178054 | 20.64 |
| 600600 | 2016 | -0.42 | 0 | 0.324862 | 0.10553548 | 24.12703 | 0.065507 | 30.83 |
| 2498   | 2016 | -0.5  | 0 | 0.324862 | 0.10553548 | 22.58532 | 0.093874 | 66.56 |
| 600690 | 2016 | -0.11 | 0 | 0.324862 | 0.10553548 | 25.60041 | 0.178054 | 20.64 |
| 2073   | 2016 | 0.011 | 0 | 0.324862 | 0.10553548 | 22.83254 | -0.16188 | 15.42 |
| 601058 | 2016 | -0.82 | 0 | 0.324862 | 0.10553548 | 22.86266 | 0.081566 | 7.84  |
| 600336 | 2016 | -0.17 | 0 | 0.324862 | 0.10553548 | 22.16202 | 0.012056 | 39.07 |
| 600060 | 2016 | 0.677 | 0 | 0.324862 | 0.10553548 | 23.84525 | 0.131453 | 39.35 |
| 300110 | 2016 | 0.056 | 0 | 0.324862 | 0.10553548 | 21.7257  | 0.014684 | 16.76 |
| 2545   | 2016 | -0.07 | 0 | 0.324862 | 0.10553548 | 22.78717 | 0.019899 | 46.92 |
| 600690 | 2016 | -0.25 | 0 | 0.324862 | 0.10553548 | 25.60041 | 0.178054 | 20.64 |
| 601058 | 2016 | -0.56 | 0 | 0.324862 | 0.10553548 | 23.28109 | 0.081566 | 7.84  |
| 600690 | 2016 | 0.224 | 0 | 0.324862 | 0.10553548 | 25.60041 | 0.178054 | 20.64 |
| 300001 | 2016 | -0.21 | 0 | 0.324862 | 0.10553548 | 23.186   | 0.065754 | 44    |
| 2073   | 2016 | 0.488 | 0 | 0.324862 | 0.10553548 | 22.83254 | -0.16188 | 15.42 |
| 300001 | 2016 | -0.63 | 0 | 0.324862 | 0.10553548 | 23.186   | 0.065754 | 44    |
| 599    | 2016 | 0.102 | 0 | 0.324862 | 0.10553548 | 22.08246 | 0.028858 | 23.38 |
| 2537   | 2016 | -0.31 | 0 | 0.324862 | 0.10553548 | 23.37971 | 0.038655 | 22.54 |

|        |      |       |   |          |            |          |          |       |
|--------|------|-------|---|----------|------------|----------|----------|-------|
| 601058 | 2016 | -0.55 | 0 | 0.324862 | 0.10553548 | 23.28109 | 0.081566 | 7.84  |
| 2094   | 2016 | -0.39 | 0 | 0.324862 | 0.10553548 | 21.70081 | 0.103638 | 23.06 |
| 2073   | 2016 | 0.011 | 0 | 0.324862 | 0.10553548 | 22.83254 | -0.16188 | 15.42 |
| 2768   | 2016 | -0.01 | 0 | 0.324862 | 0.10553548 | 21.21752 | 0.148821 | 52.5  |
| 300001 | 2016 | -0.63 | 0 | 0.324862 | 0.10553548 | 23.186   | 0.065754 | 44    |
| 600690 | 2016 | 0.632 | 0 | 0.324862 | 0.10553548 | 25.60041 | 0.178054 | 20.64 |
| 600336 | 2016 | -0.71 | 0 | 0.324862 | 0.10553548 | 22.14876 | 0.012056 | 39.07 |
| 600579 | 2016 | 0.785 | 0 | 0.324862 | 0.10553548 | 21.19485 | 0.005217 | 51.56 |
| 2498   | 2016 | -0.48 | 0 | 0.324862 | 0.10553548 | 22.58532 | 0.093874 | 66.56 |
| 600690 | 2016 | -0.17 | 0 | 0.324862 | 0.10553548 | 25.60041 | 0.178054 | 20.64 |
| 300001 | 2016 | -0.12 | 0 | 0.324862 | 0.10553548 | 23.186   | 0.065754 | 44    |
| 600579 | 2016 | 0.785 | 0 | 0.324862 | 0.10553548 | 21.19485 | 0.005217 | 51.56 |
| 601058 | 2016 | -0.55 | 0 | 0.324862 | 0.10553548 | 23.28109 | 0.081566 | 7.84  |
| 2073   | 2016 | 0.342 | 0 | 0.324862 | 0.10553548 | 22.68664 | -0.16188 | 15.42 |
| 300110 | 2016 | -0.55 | 0 | 0.324862 | 0.10553548 | 21.7257  | 0.014684 | 16.76 |
| 600690 | 2016 | -0.27 | 0 | 0.324862 | 0.10553548 | 25.60041 | 0.178054 | 20.64 |
| 2073   | 2016 | 0.709 | 0 | 0.324862 | 0.10553548 | 22.83254 | -0.16188 | 15.42 |
| 2537   | 2016 | -0.44 | 0 | 0.324862 | 0.10553548 | 23.37971 | 0.038655 | 22.54 |
| 300202 | 2016 | 0.149 | 0 | 0.199955 | 0.03998207 | 21.57233 | 0.165019 | 28.17 |
| 898    | 2016 | -0.25 | 0 | 0.199955 | 0.03998207 | 25.20139 | 0.035661 | 67.29 |
| 2667   | 2016 | 0.393 | 0 | 0.199955 | 0.03998207 | 20.54429 | -0.0321  | 24.86 |
| 300210 | 2016 | -0.05 | 0 | 0.199955 | 0.03998207 | 21.40022 | 0.060657 | 43.94 |
| 898    | 2016 | -0.25 | 0 | 0.199955 | 0.03998207 | 25.20139 | 0.035661 | 67.29 |
| 2123   | 2016 | 0.616 | 0 | 0.199955 | 0.03998207 | 22.6644  | 0.049499 | 14.81 |
| 300210 | 2016 | 0.179 | 0 | 0.199955 | 0.03998207 | 21.45253 | 0.060657 | 43.94 |
| 300210 | 2016 | 0.063 | 0 | 0.199955 | 0.03998207 | 21.40022 | 0.060657 | 43.94 |
| 2123   | 2016 | 0.616 | 0 | 0.199955 | 0.03998207 | 22.6644  | 0.049499 | 14.81 |
| 300210 | 2016 | 0.179 | 0 | 0.199955 | 0.03998207 | 21.45253 | 0.060657 | 43.94 |
| 300210 | 2016 | 0.063 | 0 | 0.199955 | 0.03998207 | 21.40022 | 0.060657 | 43.94 |
| 300210 | 2016 | -0.02 | 0 | 0.199955 | 0.03998207 | 21.45253 | 0.060657 | 43.94 |
| 2123   | 2016 | 0.616 | 0 | 0.199955 | 0.03998207 | 22.6644  | 0.049499 | 14.81 |
| 2123   | 2016 | 0.616 | 0 | 0.199955 | 0.03998207 | 22.6644  | 0.049499 | 14.81 |
| 300210 | 2016 | -0.26 | 0 | 0.199955 | 0.03998207 | 21.45253 | 0.060657 | 43.94 |
| 2123   | 2016 | 0.616 | 0 | 0.199955 | 0.03998207 | 22.6644  | 0.049499 | 14.81 |
| 300202 | 2016 | -0.25 | 0 | 0.199955 | 0.03998207 | 21.69538 | 0.165019 | 28.17 |
| 898    | 2016 | -0.25 | 0 | 0.199955 | 0.03998207 | 25.20139 | 0.035661 | 67.29 |
| 300202 | 2016 | 0.12  | 0 | 0.199955 | 0.03998207 | 21.69538 | 0.165019 | 28.17 |
| 2123   | 2016 | 0.881 | 0 | 0.199955 | 0.03998207 | 22.6644  | 0.049499 | 14.81 |
| 300202 | 2016 | 0.12  | 0 | 0.199955 | 0.03998207 | 21.69538 | 0.165019 | 28.17 |
| 300202 | 2016 | 0.249 | 0 | 0.199955 | 0.03998207 | 21.69538 | 0.165019 | 28.17 |
| 300210 | 2016 | -0.03 | 0 | 0.199955 | 0.03998207 | 21.40022 | 0.060657 | 43.94 |
| 898    | 2016 | -0.25 | 0 | 0.199955 | 0.03998207 | 25.20139 | 0.035661 | 67.29 |
| 898    | 2016 | -0.49 | 0 | 0.199955 | 0.03998207 | 25.20139 | 0.035661 | 67.29 |
| 300202 | 2016 | 0.12  | 0 | 0.199955 | 0.03998207 | 21.69538 | 0.165019 | 28.17 |
| 2667   | 2016 | 0.393 | 0 | 0.199955 | 0.03998207 | 20.54429 | -0.0321  | 24.86 |
| 898    | 2016 | -0.25 | 0 | 0.199955 | 0.03998207 | 25.18414 | 0.035661 | 67.29 |
| 2123   | 2016 | 0.439 | 0 | 0.199955 | 0.03998207 | 22.6644  | 0.049499 | 14.81 |
| 898    | 2016 | -0.49 | 0 | 0.199955 | 0.03998207 | 25.20139 | 0.035661 | 67.29 |
| 2123   | 2016 | 0.881 | 0 | 0.199955 | 0.03998207 | 22.6644  | 0.049499 | 14.81 |
| 898    | 2016 | -0.25 | 0 | 0.199955 | 0.03998207 | 25.20139 | 0.035661 | 67.29 |
| 300202 | 2016 | 0.13  | 0 | 0.199955 | 0.03998207 | 21.69538 | 0.165019 | 28.17 |
| 2123   | 2016 | 0.616 | 0 | 0.199955 | 0.03998207 | 22.6644  | 0.049499 | 14.81 |
| 2667   | 2016 | 0.393 | 0 | 0.199955 | 0.03998207 | 20.54461 | -0.0321  | 24.86 |
| 300210 | 2016 | -0.02 | 0 | 0.199955 | 0.03998207 | 21.45253 | 0.060657 | 43.94 |

|        |      |       |      |          |            |          |          |       |
|--------|------|-------|------|----------|------------|----------|----------|-------|
| 2123   | 2016 | 0.616 | 0    | 0.199955 | 0.03998207 | 22.6644  | 0.049499 | 14.81 |
| 2123   | 2016 | 0.616 | 0    | 0.199955 | 0.03998207 | 22.6644  | 0.049499 | 14.81 |
| 2123   | 2016 | 0.218 | 0    | 0.199955 | 0.03998207 | 22.58279 | 0.049499 | 14.81 |
| 717    | 2016 | -0.16 | 0.05 | 0.108844 | 0.01184694 | 23.42969 | 0.22122  | 53.37 |
| 600673 | 2016 | 0.474 | 0.05 | 0.108844 | 0.01184694 | 23.13719 | 0.013444 | 30.59 |
| 717    | 2016 | -0.37 | 0.05 | 0.108844 | 0.01184694 | 23.42954 | 0.22122  | 53.37 |
| 600673 | 2016 | -0.01 | 0.05 | 0.108844 | 0.01184694 | 23.13719 | 0.013444 | 30.59 |
| 600673 | 2016 | 0.033 | 0.05 | 0.108844 | 0.01184694 | 23.13719 | 0.013444 | 30.59 |
| 717    | 2016 | -0.16 | 0.05 | 0.108844 | 0.01184694 | 23.42969 | 0.22122  | 53.37 |
| 717    | 2016 | -0.37 | 0.05 | 0.108844 | 0.01184694 | 23.42969 | 0.22122  | 53.37 |
| 600673 | 2016 | 0.474 | 0.05 | 0.108844 | 0.01184694 | 23.13719 | 0.013444 | 30.59 |
| 600673 | 2016 | 0.474 | 0.05 | 0.108844 | 0.01184694 | 23.13719 | 0.013444 | 30.59 |
| 600673 | 2016 | -0.85 | 0.05 | 0.108844 | 0.01184694 | 23.13719 | 0.013444 | 30.59 |
| 601    | 2016 | -0.58 | 0.05 | 0.108844 | 0.01184694 | 22.90178 | 0.102976 | 15    |
| 600673 | 2016 | 0.474 | 0.05 | 0.108844 | 0.01184694 | 22.6298  | 0.013444 | 30.59 |
| 601    | 2016 | -0.58 | 0.05 | 0.108844 | 0.01184694 | 22.90178 | 0.102976 | 15    |
| 717    | 2016 | -0.35 | 0.05 | 0.108844 | 0.01184694 | 23.42969 | 0.22122  | 53.37 |
| 600673 | 2016 | -0.19 | 0.05 | 0.108844 | 0.01184694 | 23.13719 | 0.013444 | 30.59 |
| 600673 | 2016 | 0.474 | 0.05 | 0.108844 | 0.01184694 | 23.13719 | 0.013444 | 30.59 |
| 600673 | 2016 | 0.067 | 0.05 | 0.108844 | 0.01184694 | 23.13719 | 0.013444 | 30.59 |
| 601    | 2016 | -0.88 | 0.05 | 0.108844 | 0.01184694 | 22.46103 | 0.102976 | 15    |
| 601    | 2016 | -0.47 | 0.05 | 0.108844 | 0.01184694 | 22.90178 | 0.102976 | 15    |
| 600567 | 2016 | -0.66 | 0.03 | 1.30904  | 1.7135854  | 23.72144 | 0.042586 | 28.06 |
| 600808 | 2016 | -0.01 | 0.03 | 1.30904  | 1.7135854  | 24.91663 | 0.056914 | 45.54 |
| 600808 | 2016 | -0.01 | 0.03 | 1.30904  | 1.7135854  | 24.91663 | 0.056914 | 45.54 |
| 600375 | 2016 | -0.63 | 0.03 | 1.30904  | 1.7135854  | 23.00231 | 0.028084 | 10.89 |
| 600567 | 2016 | -0.75 | 0.03 | 1.30904  | 1.7135854  | 23.72144 | 0.042586 | 28.06 |
| 2147   | 2016 | -0.64 | 0.03 | 1.30904  | 1.7135854  | 23.45521 | 0.205552 | 62.05 |
| 600375 | 2016 | -0.63 | 0.03 | 1.30904  | 1.7135854  | 23.00231 | 0.028084 | 10.89 |
| 2057   | 2016 | -0.31 | 0.03 | 1.30904  | 1.7135854  | 20.34813 | 0.063029 | 25.94 |
| 2347   | 2016 | -0.3  | 0.03 | 1.30904  | 1.7135854  | 21.3111  | 0.008139 | 31.24 |
| 2347   | 2016 | -0.36 | 0.03 | 1.30904  | 1.7135854  | 21.3111  | 0.008139 | 31.24 |
| 2147   | 2016 | -0.31 | 0.03 | 1.30904  | 1.7135854  | 23.45521 | 0.205552 | 62.05 |
| 600567 | 2016 | -0.75 | 0.03 | 1.30904  | 1.7135854  | 23.72144 | 0.042586 | 28.06 |
| 2147   | 2016 | -0.26 | 0.03 | 1.30904  | 1.7135854  | 23.45521 | 0.205552 | 62.05 |
| 600808 | 2016 | -0.67 | 0.03 | 1.30904  | 1.7135854  | 24.91663 | 0.056914 | 45.54 |
| 2057   | 2016 | -0.05 | 0.03 | 1.30904  | 1.7135854  | 20.34813 | 0.063029 | 25.94 |
| 600808 | 2016 | -0.31 | 0.03 | 1.30904  | 1.7135854  | 24.91663 | 0.056914 | 45.54 |
| 600567 | 2016 | -0.73 | 0.03 | 1.30904  | 1.7135854  | 23.72144 | 0.042586 | 28.06 |
| 2057   | 2016 | -0.09 | 0.03 | 1.30904  | 1.7135854  | 20.28896 | 0.063029 | 25.94 |
| 2057   | 2016 | 0.081 | 0.03 | 1.30904  | 1.7135854  | 20.34813 | 0.063029 | 25.94 |
| 2147   | 2016 | -0.85 | 0.03 | 1.30904  | 1.7135854  | 23.45521 | 0.205552 | 62.05 |
| 2147   | 2016 | -0.85 | 0.03 | 1.30904  | 1.7135854  | 23.45521 | 0.205552 | 62.05 |
| 600808 | 2016 | -0.43 | 0.03 | 1.30904  | 1.7135854  | 24.91663 | 0.056914 | 45.54 |
| 600375 | 2016 | -0.33 | 0.03 | 1.30904  | 1.7135854  | 23.00231 | 0.028084 | 10.89 |
| 2147   | 2016 | -0.47 | 0.03 | 1.30904  | 1.7135854  | 23.45521 | 0.205552 | 62.05 |
| 600808 | 2016 | -0.06 | 0.03 | 1.30904  | 1.7135854  | 24.91663 | 0.056914 | 45.54 |
| 600375 | 2016 | -0.63 | 0.03 | 1.30904  | 1.7135854  | 23.00231 | 0.028084 | 10.89 |
| 2347   | 2016 | -0.36 | 0.03 | 1.30904  | 1.7135854  | 21.3111  | 0.008139 | 31.24 |
| 2147   | 2016 | -0.26 | 0.03 | 1.30904  | 1.7135854  | 23.45521 | 0.205552 | 62.05 |
| 600375 | 2016 | -0.22 | 0.03 | 1.30904  | 1.7135854  | 23.00231 | 0.028084 | 10.89 |
| 600808 | 2016 | -0.67 | 0.03 | 1.30904  | 1.7135854  | 24.73313 | 0.056914 | 45.54 |
| 600567 | 2016 | -0.64 | 0.03 | 1.30904  | 1.7135854  | 23.72144 | 0.042586 | 28.06 |
| 2147   | 2016 | -0.85 | 0.03 | 1.30904  | 1.7135854  | 23.45521 | 0.205552 | 62.05 |



|        |      |       |      |          |            |          |          |       |
|--------|------|-------|------|----------|------------|----------|----------|-------|
| 600375 | 2016 | -0.47 | 0.03 | 1.30904  | 1.7135854  | 23.00231 | 0.028084 | 10.89 |
| 2347   | 2016 | -0.36 | 0.03 | 1.30904  | 1.7135854  | 21.3111  | 0.008139 | 31.24 |
| 2147   | 2016 | -0.46 | 0.03 | 1.30904  | 1.7135854  | 23.45521 | 0.205552 | 62.05 |
| 600567 | 2016 | -0.75 | 0.03 | 1.30904  | 1.7135854  | 23.72144 | 0.042586 | 28.06 |
| 600567 | 2016 | -0.11 | 0.03 | 1.30904  | 1.7135854  | 23.72144 | 0.042586 | 28.06 |
| 2347   | 2016 | -0.66 | 0.03 | 1.30904  | 1.7135854  | 21.34876 | 0.008139 | 31.24 |
| 600375 | 2016 | -0.63 | 0.03 | 1.30904  | 1.7135854  | 23.00231 | 0.028084 | 10.89 |
| 2147   | 2016 | 0.471 | 0.03 | 1.30904  | 1.7135854  | 23.45521 | 0.205552 | 62.05 |
| 600375 | 2016 | -0.25 | 0.03 | 1.30904  | 1.7135854  | 23.00231 | 0.028084 | 10.89 |
| 2057   | 2016 | -0.31 | 0.03 | 1.30904  | 1.7135854  | 20.34813 | 0.063029 | 25.94 |
| 600375 | 2016 | -0.25 | 0.03 | 1.30904  | 1.7135854  | 23.00231 | 0.028084 | 10.89 |
| 2057   | 2016 | -0.09 | 0.03 | 1.30904  | 1.7135854  | 20.34813 | 0.063029 | 25.94 |
| 600567 | 2016 | -0.3  | 0.03 | 1.30904  | 1.7135854  | 23.4662  | 0.042586 | 28.06 |
| 2347   | 2016 | 0.002 | 0.03 | 1.30904  | 1.7135854  | 21.3111  | 0.008139 | 31.24 |
| 2147   | 2016 | -0.47 | 0.03 | 1.30904  | 1.7135854  | 23.45521 | 0.205552 | 62.05 |
| 600375 | 2016 | -0.63 | 0.03 | 1.30904  | 1.7135854  | 22.63399 | 0.028084 | 10.89 |
| 2057   | 2016 | 0.081 | 0.03 | 1.30904  | 1.7135854  | 20.34813 | 0.063029 | 25.94 |
| 600375 | 2016 | -0.63 | 0.03 | 1.30904  | 1.7135854  | 23.00231 | 0.028084 | 10.89 |
| 2347   | 2016 | 0.002 | 0.03 | 1.30904  | 1.7135854  | 21.3111  | 0.008139 | 31.24 |
| 2347   | 2016 | -0.66 | 0.03 | 1.30904  | 1.7135854  | 21.3111  | 0.008139 | 31.24 |
| 600375 | 2016 | 0.055 | 0.03 | 1.30904  | 1.7135854  | 23.00231 | 0.028084 | 10.89 |
| 2147   | 2016 | -0.85 | 0.03 | 1.30904  | 1.7135854  | 23.41497 | 0.205552 | 62.05 |
| 600567 | 2016 | -0.33 | 0.03 | 1.30904  | 1.7135854  | 23.72144 | 0.042586 | 28.06 |
| 600375 | 2016 | -0.63 | 0.03 | 1.30904  | 1.7135854  | 23.00231 | 0.028084 | 10.89 |
| 600375 | 2016 | -0.51 | 0.03 | 1.30904  | 1.7135854  | 23.00231 | 0.028084 | 10.89 |
| 603567 | 2016 | 0.556 | 0.02 | 1.458956 | 2.1285537  | 22.58253 | 0.115324 | 67.83 |
| 603567 | 2016 | 0.756 | 0.02 | 1.458956 | 2.1285537  | 22.58253 | 0.115324 | 67.83 |
| 603567 | 2016 | 0.63  | 0.02 | 1.458956 | 2.1285537  | 22.58253 | 0.115324 | 67.83 |
| 603567 | 2016 | 0.756 | 0.02 | 1.458956 | 2.1285537  | 22.42807 | 0.115324 | 67.83 |
| 603567 | 2016 | 0.556 | 0.02 | 1.458956 | 2.1285537  | 22.58253 | 0.115324 | 67.83 |
| 600362 | 2016 | 0.571 | 0.02 | 1.05571  | 1.1145236  | 25.19358 | 0.01927  | 40.53 |
| 300066 | 2016 | -0.46 | 0.02 | 1.05571  | 1.1145236  | 21.29048 | 0.087927 | 40.84 |
| 300066 | 2016 | -0.4  | 0.02 | 1.05571  | 1.1145236  | 21.29048 | 0.087927 | 40.84 |
| 600362 | 2016 | -0.12 | 0.02 | 1.05571  | 1.1145236  | 25.19358 | 0.01927  | 40.53 |
| 600362 | 2016 | -0.47 | 0.02 | 1.05571  | 1.1145236  | 25.19358 | 0.01927  | 40.53 |
| 600362 | 2016 | -0.75 | 0.02 | 1.05571  | 1.1145236  | 25.19358 | 0.01927  | 40.53 |
| 600362 | 2016 | -0.12 | 0.02 | 1.05571  | 1.1145236  | 25.19358 | 0.01927  | 40.53 |
| 600362 | 2016 | -0.3  | 0.02 | 1.05571  | 1.1145236  | 25.19358 | 0.01927  | 40.53 |
| 600362 | 2016 | -0.27 | 0.02 | 1.05571  | 1.1145236  | 25.19358 | 0.01927  | 40.53 |
| 300066 | 2016 | -0.43 | 0.02 | 1.05571  | 1.1145236  | 21.29048 | 0.087927 | 40.84 |
| 300066 | 2016 | -0.43 | 0.02 | 1.05571  | 1.1145236  | 21.29048 | 0.087927 | 40.84 |
| 600362 | 2016 | 0.571 | 0.02 | 1.05571  | 1.1145236  | 25.19358 | 0.01927  | 40.53 |
| 600362 | 2016 | -0.75 | 0.02 | 1.05571  | 1.1145236  | 24.79537 | 0.01927  | 40.53 |
| 300066 | 2016 | -0.46 | 0.02 | 1.05571  | 1.1145236  | 21.17991 | 0.087927 | 40.84 |
| 300066 | 2016 | -0.38 | 0.02 | 1.05571  | 1.1145236  | 21.29048 | 0.087927 | 40.84 |
| 300066 | 2016 | -0.35 | 0.02 | 1.05571  | 1.1145236  | 21.29048 | 0.087927 | 40.84 |
| 952    | 2016 | 0.698 | 0.05 | 0.067875 | 0.00460708 | 21.20998 | 0.220451 | 16.57 |
| 952    | 2016 | -0.03 | 0.05 | 0.067875 | 0.00460708 | 21.21422 | 0.220451 | 16.57 |
| 952    | 2016 | -0.11 | 0.05 | 0.067875 | 0.00460708 | 21.21422 | 0.220451 | 16.57 |
| 952    | 2016 | -0.11 | 0.05 | 0.067875 | 0.00460708 | 21.21422 | 0.220451 | 16.57 |
| 952    | 2016 | -0.31 | 0.05 | 0.067875 | 0.00460708 | 21.21422 | 0.220451 | 16.57 |
| 952    | 2016 | 0.027 | 0.05 | 0.067875 | 0.00460708 | 21.21422 | 0.220451 | 16.57 |
| 952    | 2016 | -0.03 | 0.05 | 0.067875 | 0.00460708 | 21.21422 | 0.220451 | 16.57 |
| 2014   | 2016 | 0.3   | 0.03 | 0.890973 | 0.79383275 | 21.54609 | 0.118197 | 30.61 |

|        |      |       |      |          |            |          |          |       |
|--------|------|-------|------|----------|------------|----------|----------|-------|
| 2014   | 2016 | 0.003 | 0.03 | 0.890973 | 0.79383275 | 21.54609 | 0.118197 | 30.61 |
| 2014   | 2016 | -0.29 | 0.03 | 0.890973 | 0.79383275 | 21.54609 | 0.118197 | 30.61 |
| 2014   | 2016 | -0.51 | 0.03 | 0.890973 | 0.79383275 | 21.54609 | 0.118197 | 30.61 |
| 2014   | 2016 | -0.12 | 0.03 | 0.890973 | 0.79383275 | 21.54609 | 0.118197 | 30.61 |
| 2014   | 2016 | 0.003 | 0.03 | 0.890973 | 0.79383275 | 21.39578 | 0.118197 | 30.61 |
| 2014   | 2016 | -0.51 | 0.03 | 0.890973 | 0.79383275 | 21.54609 | 0.118197 | 30.61 |
| 2014   | 2016 | -0.08 | 0.03 | 0.890973 | 0.79383275 | 21.54609 | 0.118197 | 30.61 |
| 600745 | 2016 | -0.05 | 0.05 | 1.527512 | 2.3332922  | 22.25754 | 0.03753  | 24.16 |
| 600745 | 2016 | -0.02 | 0.05 | 1.527512 | 2.3332922  | 23.27893 | 0.03753  | 24.16 |
| 300276 | 2016 | -0.08 | 0.05 | 1.527512 | 2.3332922  | 20.63842 | 0.026233 | 39.77 |
| 300276 | 2016 | -0.21 | 0.05 | 1.527512 | 2.3332922  | 20.69348 | 0.026233 | 39.77 |
| 300276 | 2016 | -0.11 | 0.05 | 1.527512 | 2.3332922  | 20.69348 | 0.026233 | 39.77 |
| 300276 | 2016 | -0.08 | 0.05 | 1.527512 | 2.3332922  | 20.69348 | 0.026233 | 39.77 |
| 600745 | 2016 | 0.118 | 0.05 | 1.527512 | 2.3332922  | 23.27893 | 0.03753  | 24.16 |
| 708    | 2016 | 0.024 | 0.05 | 1.527512 | 2.3332922  | 22.48922 | 0.078608 | 29.95 |
| 708    | 2016 | 0.024 | 0.05 | 1.527512 | 2.3332922  | 22.48922 | 0.078608 | 29.95 |
| 300276 | 2016 | -0.16 | 0.05 | 1.527512 | 2.3332922  | 20.69348 | 0.026233 | 39.77 |
| 300276 | 2016 | -0.42 | 0.05 | 1.527512 | 2.3332922  | 20.69348 | 0.026233 | 39.77 |
| 708    | 2016 | 0.024 | 0.05 | 1.527512 | 2.3332922  | 22.48922 | 0.078608 | 29.95 |
| 300276 | 2016 | -0.2  | 0.05 | 1.527512 | 2.3332922  | 20.69348 | 0.026233 | 39.77 |
| 600745 | 2016 | -0.02 | 0.05 | 1.527512 | 2.3332922  | 23.27893 | 0.03753  | 24.16 |
| 600745 | 2016 | 0.118 | 0.05 | 1.527512 | 2.3332922  | 23.27893 | 0.03753  | 24.16 |
| 601106 | 2016 | 0.386 | 0.02 | 1.215475 | 1.4773792  | 24.13827 | -0.4336  | 62.11 |
| 601106 | 2016 | 0.017 | 0.02 | 1.215475 | 1.4773792  | 24.13827 | -0.4336  | 62.11 |
| 600187 | 2016 | -0.27 | 0.02 | 1.215475 | 1.4773792  | 22.1483  | 0.005398 | 15.62 |
| 600187 | 2016 | -0.27 | 0.02 | 1.215475 | 1.4773792  | 22.1483  | 0.005398 | 15.62 |
| 601106 | 2016 | 0.435 | 0.02 | 1.215475 | 1.4773792  | 24.13827 | -0.4336  | 62.11 |
| 600187 | 2016 | -0.27 | 0.02 | 1.215475 | 1.4773792  | 22.1483  | 0.005398 | 15.62 |
| 600187 | 2016 | -0.27 | 0.02 | 1.215475 | 1.4773792  | 22.1483  | 0.005398 | 15.62 |
| 601106 | 2016 | 0.05  | 0.02 | 1.215475 | 1.4773792  | 24.13827 | -0.4336  | 62.11 |
| 601106 | 2016 | 0.364 | 0.02 | 1.215475 | 1.4773792  | 24.13827 | -0.4336  | 62.11 |
| 601106 | 2016 | 0.403 | 0.02 | 1.215475 | 1.4773792  | 24.13827 | -0.4336  | 62.11 |
| 601106 | 2016 | 0.893 | 0.02 | 1.215475 | 1.4773792  | 24.13827 | -0.4336  | 62.11 |
| 601106 | 2016 | 0.459 | 0.02 | 1.215475 | 1.4773792  | 24.11068 | -0.4336  | 62.11 |
| 601106 | 2016 | 0.328 | 0.02 | 1.215475 | 1.4773792  | 24.13827 | -0.4336  | 62.11 |
| 600187 | 2016 | -0.27 | 0.02 | 1.215475 | 1.4773792  | 22.1483  | 0.005398 | 15.62 |
| 601106 | 2016 | 0.456 | 0.02 | 1.215475 | 1.4773792  | 24.13827 | -0.4336  | 62.11 |
| 600187 | 2016 | -0.27 | 0.02 | 1.215475 | 1.4773792  | 21.98545 | 0.005398 | 15.62 |
| 601106 | 2016 | 0.456 | 0.02 | 1.215475 | 1.4773792  | 24.13827 | -0.4336  | 62.11 |
| 601106 | 2016 | 0.386 | 0.02 | 1.215475 | 1.4773792  | 24.13827 | -0.4336  | 62.11 |
| 601106 | 2016 | 0.366 | 0.02 | 1.215475 | 1.4773792  | 24.13827 | -0.4336  | 62.11 |
| 2740   | 2016 | -0.85 | 0.04 | 1.235737 | 1.5270455  | 21.37514 | 0.041415 | 23.58 |
| 601899 | 2016 | 0.377 | 0.04 | 1.235737 | 1.5270455  | 25.21435 | 0.054224 | 26.5  |
| 601899 | 2016 | -0.02 | 0.04 | 1.235737 | 1.5270455  | 24.74775 | 0.054224 | 26.5  |
| 600388 | 2016 | 0.215 | 0.04 | 1.235737 | 1.5270455  | 23.40658 | 0.165208 | 17.17 |
| 2682   | 2016 | -0.09 | 0.04 | 1.235737 | 1.5270455  | 22.26413 | 0.038785 | 26.55 |
| 2740   | 2016 | -0.85 | 0.04 | 1.235737 | 1.5270455  | 21.38728 | 0.041415 | 23.58 |
| 600388 | 2016 | 0.046 | 0.04 | 1.235737 | 1.5270455  | 23.40658 | 0.165208 | 17.17 |
| 2682   | 2016 | -0.09 | 0.04 | 1.235737 | 1.5270455  | 22.26413 | 0.038785 | 26.55 |
| 601899 | 2016 | -0.44 | 0.04 | 1.235737 | 1.5270455  | 25.21435 | 0.054224 | 26.5  |
| 603686 | 2016 | -0.5  | 0.04 | 1.235737 | 1.5270455  | 21.64492 | 0.172623 | 22.04 |
| 603686 | 2016 | -0.28 | 0.04 | 1.235737 | 1.5270455  | 21.69623 | 0.172623 | 22.04 |
| 603686 | 2016 | -0.28 | 0.04 | 1.235737 | 1.5270455  | 21.69623 | 0.172623 | 22.04 |
| 601899 | 2016 | -0.21 | 0.04 | 1.235737 | 1.5270455  | 25.21435 | 0.054224 | 26.5  |

|        |      |       |      |          |            |          |          |       |
|--------|------|-------|------|----------|------------|----------|----------|-------|
| 603686 | 2016 | -0.5  | 0.04 | 1.235737 | 1.5270455  | 21.64492 | 0.172623 | 22.04 |
| 2740   | 2016 | -0.85 | 0.04 | 1.235737 | 1.5270455  | 21.37514 | 0.041415 | 23.58 |
| 600388 | 2016 | -0.45 | 0.04 | 1.235737 | 1.5270455  | 23.40658 | 0.165208 | 17.17 |
| 600388 | 2016 | -0.01 | 0.04 | 1.235737 | 1.5270455  | 23.40658 | 0.165208 | 17.17 |
| 601899 | 2016 | 0.093 | 0.04 | 1.235737 | 1.5270455  | 25.21435 | 0.054224 | 26.5  |
| 603686 | 2016 | -0.28 | 0.04 | 1.235737 | 1.5270455  | 21.64492 | 0.172623 | 22.04 |
| 600388 | 2016 | 0.017 | 0.04 | 1.235737 | 1.5270455  | 23.40658 | 0.165208 | 17.17 |
| 600388 | 2016 | -0.01 | 0.04 | 1.235737 | 1.5270455  | 23.40658 | 0.165208 | 17.17 |
| 601899 | 2016 | -0.51 | 0.04 | 1.235737 | 1.5270455  | 25.21435 | 0.054224 | 26.5  |
| 600388 | 2016 | -0.12 | 0.04 | 1.235737 | 1.5270455  | 23.40658 | 0.165208 | 17.17 |
| 2682   | 2016 | -0.09 | 0.04 | 1.235737 | 1.5270455  | 21.61441 | 0.038785 | 26.55 |
| 600388 | 2016 | 0.146 | 0.04 | 1.235737 | 1.5270455  | 23.40658 | 0.165208 | 17.17 |
| 600388 | 2016 | 0.19  | 0.04 | 1.235737 | 1.5270455  | 23.40658 | 0.165208 | 17.17 |
| 600388 | 2016 | 0.046 | 0.04 | 1.235737 | 1.5270455  | 23.40658 | 0.165208 | 17.17 |
| 600388 | 2016 | -0.1  | 0.04 | 1.235737 | 1.5270455  | 23.40658 | 0.165208 | 17.17 |
| 2682   | 2016 | -0.59 | 0.04 | 1.235737 | 1.5270455  | 22.26413 | 0.038785 | 26.55 |
| 601899 | 2016 | 0.093 | 0.04 | 1.235737 | 1.5270455  | 25.21435 | 0.054224 | 26.5  |
| 2682   | 2016 | -0.59 | 0.04 | 1.235737 | 1.5270455  | 22.26413 | 0.038785 | 26.55 |
| 601899 | 2016 | -0.95 | 0.04 | 1.235737 | 1.5270455  | 25.21435 | 0.054224 | 26.5  |
| 600388 | 2016 | 0.12  | 0.04 | 1.235737 | 1.5270455  | 23.40658 | 0.165208 | 17.17 |
| 601899 | 2016 | -0.73 | 0.04 | 1.235737 | 1.5270455  | 25.21435 | 0.054224 | 26.5  |
| 601899 | 2016 | 0.206 | 0.04 | 1.235737 | 1.5270455  | 25.21435 | 0.054224 | 26.5  |
| 601899 | 2016 | -0.52 | 0.04 | 1.235737 | 1.5270455  | 25.21435 | 0.054224 | 26.5  |
| 2682   | 2016 | -0.56 | 0.04 | 1.235737 | 1.5270455  | 22.26413 | 0.038785 | 26.55 |
| 600388 | 2016 | -0.45 | 0.04 | 1.235737 | 1.5270455  | 23.40658 | 0.165208 | 17.17 |
| 600388 | 2016 | 0.032 | 0.04 | 1.235737 | 1.5270455  | 23.40658 | 0.165208 | 17.17 |
| 601899 | 2016 | -0.73 | 0.04 | 1.235737 | 1.5270455  | 25.21435 | 0.054224 | 26.5  |
| 601899 | 2016 | -0.95 | 0.04 | 1.235737 | 1.5270455  | 25.21435 | 0.054224 | 26.5  |
| 600388 | 2016 | 0.435 | 0.04 | 1.235737 | 1.5270455  | 23.20388 | 0.165208 | 17.17 |
| 601011 | 2017 | -0.58 | 0.02 | 1.270351 | 1.6137905  | 23.05112 | 0.024293 | 28.38 |
| 601011 | 2017 | -0.58 | 0.02 | 1.270351 | 1.6137905  | 23.05112 | 0.024293 | 28.38 |
| 601011 | 2017 | -0.58 | 0.02 | 1.270351 | 1.6137905  | 23.05112 | 0.024293 | 28.38 |
| 601011 | 2017 | -0.58 | 0.02 | 1.270351 | 1.6137905  | 22.85984 | 0.024293 | 28.38 |
| 601011 | 2017 | -0.58 | 0.02 | 1.270351 | 1.6137905  | 23.05112 | 0.024293 | 28.38 |
| 601011 | 2017 | -0.58 | 0.02 | 1.270351 | 1.6137905  | 23.05112 | 0.024293 | 28.38 |
| 601011 | 2017 | -0.58 | 0.02 | 1.270351 | 1.6137905  | 23.05112 | 0.024293 | 28.38 |
| 601011 | 2017 | -0.58 | 0.02 | 1.270351 | 1.6137905  | 23.05112 | 0.024293 | 28.38 |
| 2596   | 2017 | -0.21 | 0.11 | 1.41502  | 2.0022824  | 22.32894 | 0.077915 | 14.22 |
| 2596   | 2017 | -0.21 | 0.11 | 1.41502  | 2.0022824  | 22.32894 | 0.077915 | 14.22 |
| 2596   | 2017 | 0.671 | 0.11 | 1.41502  | 2.0022824  | 22.32894 | 0.077915 | 14.22 |
| 2596   | 2017 | 0.23  | 0.11 | 1.41502  | 2.0022824  | 22.32894 | 0.077915 | 14.22 |
| 2596   | 2017 | 0.671 | 0.11 | 1.41502  | 2.0022824  | 22.32894 | 0.077915 | 14.22 |
| 2596   | 2017 | 0.377 | 0.11 | 1.41502  | 2.0022824  | 22.32894 | 0.077915 | 14.22 |
| 2596   | 2017 | 0.671 | 0.11 | 1.41502  | 2.0022824  | 21.9447  | 0.077915 | 14.22 |
| 2684   | 2017 | -0.61 | 0.02 | 0.248896 | 0.06194936 | 23.12443 | -0.06179 | 24.52 |
| 2684   | 2017 | -0.16 | 0.02 | 0.248896 | 0.06194936 | 23.12443 | -0.06179 | 24.52 |
| 600403 | 2017 | -0.78 | 0.02 | 0.248896 | 0.06194936 | 23.92108 | 0.059927 | 63.04 |
| 2684   | 2017 | 0.108 | 0.02 | 0.248896 | 0.06194936 | 23.12443 | -0.06179 | 24.52 |
| 2684   | 2017 | -0.61 | 0.02 | 0.248896 | 0.06194936 | 23.12443 | -0.06179 | 24.52 |
| 2684   | 2017 | 0.049 | 0.02 | 0.248896 | 0.06194936 | 23.12443 | -0.06179 | 24.52 |
| 2684   | 2017 | -0.61 | 0.02 | 0.248896 | 0.06194936 | 23.12443 | -0.06179 | 24.52 |
| 600403 | 2017 | -0.78 | 0.02 | 0.248896 | 0.06194936 | 23.52304 | 0.059927 | 63.04 |
| 2684   | 2017 | -0.17 | 0.02 | 0.248896 | 0.06194936 | 23.12443 | -0.06179 | 24.52 |
| 2684   | 2017 | -0.61 | 0.02 | 0.248896 | 0.06194936 | 23.12443 | -0.06179 | 24.52 |

|        |      |       |      |          |            |          |          |       |
|--------|------|-------|------|----------|------------|----------|----------|-------|
| 2684   | 2017 | -0.61 | 0.02 | 0.248896 | 0.06194936 | 23.12443 | -0.06179 | 24.52 |
| 2684   | 2017 | -0.17 | 0.02 | 0.248896 | 0.06194936 | 23.12443 | -0.06179 | 24.52 |
| 2684   | 2017 | 0.712 | 0.02 | 0.248896 | 0.06194936 | 23.12443 | -0.06179 | 24.52 |
| 2684   | 2017 | -0.35 | 0.02 | 0.248896 | 0.06194936 | 23.12443 | -0.06179 | 24.52 |
| 600403 | 2017 | -0.78 | 0.02 | 0.248896 | 0.06194936 | 23.52304 | 0.059927 | 63.04 |
| 2684   | 2017 | -0.23 | 0.02 | 0.248896 | 0.06194936 | 23.12443 | -0.06179 | 24.52 |
| 2684   | 2017 | -0.17 | 0.02 | 0.248896 | 0.06194936 | 23.12443 | -0.06179 | 24.52 |
| 2684   | 2017 | 0.049 | 0.02 | 0.248896 | 0.06194936 | 23.12443 | -0.06179 | 24.52 |
| 600403 | 2017 | -0.78 | 0.02 | 0.248896 | 0.06194936 | 23.52304 | 0.059927 | 63.04 |
| 2684   | 2017 | -0.61 | 0.02 | 0.248896 | 0.06194936 | 23.12443 | -0.06179 | 24.52 |
| 2684   | 2017 | -0.61 | 0.02 | 0.248896 | 0.06194936 | 23.12443 | -0.06179 | 24.52 |
| 2684   | 2017 | -0.52 | 0.02 | 0.248896 | 0.06194936 | 23.12443 | -0.06179 | 24.52 |
| 2684   | 2017 | -0.61 | 0.02 | 0.248896 | 0.06194936 | 23.12443 | -0.06179 | 24.52 |
| 2684   | 2017 | 0.27  | 0.02 | 0.248896 | 0.06194936 | 23.12443 | -0.06179 | 24.52 |
| 2684   | 2017 | 0.11  | 0.02 | 0.248896 | 0.06194936 | 23.12443 | -0.06179 | 24.52 |
| 2684   | 2017 | -0.61 | 0.02 | 0.248896 | 0.06194936 | 23.12443 | -0.06179 | 24.52 |
| 600403 | 2017 | -0.78 | 0.02 | 0.248896 | 0.06194936 | 23.52304 | 0.059927 | 63.04 |
| 2684   | 2017 | 0.27  | 0.02 | 0.248896 | 0.06194936 | 22.7628  | -0.06179 | 24.52 |
| 2684   | 2017 | 0.27  | 0.02 | 0.248896 | 0.06194936 | 23.12443 | -0.06179 | 24.52 |
| 2684   | 2017 | -0.61 | 0.02 | 0.248896 | 0.06194936 | 23.12443 | -0.06179 | 24.52 |
| 600403 | 2017 | -0.78 | 0.02 | 0.248896 | 0.06194936 | 23.52304 | 0.059927 | 63.04 |
| 2684   | 2017 | -0.05 | 0.02 | 0.248896 | 0.06194936 | 23.12443 | -0.06179 | 24.52 |
| 2684   | 2017 | -0.05 | 0.02 | 0.248896 | 0.06194936 | 23.12443 | -0.06179 | 24.52 |
| 2684   | 2017 | -0.24 | 0.02 | 0.248896 | 0.06194936 | 23.12443 | -0.06179 | 24.52 |
| 2684   | 2017 | 0.27  | 0.02 | 0.248896 | 0.06194936 | 23.12443 | -0.06179 | 24.52 |
| 2684   | 2017 | -0.61 | 0.02 | 0.248896 | 0.06194936 | 23.12443 | -0.06179 | 24.52 |
| 2684   | 2017 | -0.61 | 0.02 | 0.248896 | 0.06194936 | 23.12443 | -0.06179 | 24.52 |
| 600403 | 2017 | -0.78 | 0.02 | 0.248896 | 0.06194936 | 23.52304 | 0.059927 | 63.04 |
| 2684   | 2017 | -0.61 | 0.02 | 0.248896 | 0.06194936 | 23.12443 | -0.06179 | 24.52 |
| 600071 | 2017 | -0.73 | 0.03 | 1.311696 | 1.7205473  | 20.65257 | 0.068732 | 39.46 |
| 600071 | 2017 | -0.73 | 0.03 | 1.311696 | 1.7205473  | 20.65257 | 0.068732 | 39.46 |
| 600071 | 2017 | -0.73 | 0.03 | 1.311696 | 1.7205473  | 20.65257 | 0.068732 | 39.46 |
| 600071 | 2017 | -0.73 | 0.03 | 1.311696 | 1.7205473  | 20.10336 | 0.068732 | 39.46 |
| 600071 | 2017 | -0.73 | 0.03 | 1.311696 | 1.7205473  | 20.65257 | 0.068732 | 39.46 |
| 600071 | 2017 | -0.73 | 0.03 | 1.311696 | 1.7205473  | 20.65257 | 0.068732 | 39.46 |
| 600071 | 2017 | -0.73 | 0.03 | 1.311696 | 1.7205473  | 20.65257 | 0.068732 | 39.46 |
| 600071 | 2017 | -0.73 | 0.03 | 1.311696 | 1.7205473  | 20.65257 | 0.068732 | 39.46 |
| 600071 | 2017 | -0.73 | 0.03 | 1.311696 | 1.7205473  | 20.65257 | 0.068732 | 39.46 |
| 600071 | 2017 | -0.73 | 0.03 | 1.311696 | 1.7205473  | 20.65257 | 0.068732 | 39.46 |
| 600071 | 2017 | -0.73 | 0.03 | 1.311696 | 1.7205473  | 20.65257 | 0.068732 | 39.46 |
| 600071 | 2017 | -0.73 | 0.03 | 1.311696 | 1.7205473  | 20.65257 | 0.068732 | 39.46 |
| 300285 | 2017 | 1.037 | 0.01 | 1.603837 | 2.572294   | 21.91388 | 0.120493 | 25.1  |
| 600308 | 2017 | 0.213 | 0.01 | 1.603837 | 2.572294   | 23.38155 | 0.092822 | 35.64 |
| 600308 | 2017 | 0.213 | 0.01 | 1.603837 | 2.572294   | 23.38155 | 0.092822 | 35.64 |
| 600986 | 2017 | -0.81 | 0.01 | 1.603837 | 2.572294   | 23.0888  | 0.07896  | 12.6  |
| 603026 | 2017 | 0.128 | 0.01 | 1.603837 | 2.572294   | 21.6939  | 0.123215 | 28.21 |
| 2476   | 2017 | 0.784 | 0.01 | 1.603837 | 2.572294   | 20.96675 | 0.000393 | 15.8  |
| 300285 | 2017 | 1.037 | 0.01 | 1.603837 | 2.572294   | 21.91388 | 0.120493 | 25.1  |
| 600308 | 2017 | 0.213 | 0.01 | 1.603837 | 2.572294   | 23.38155 | 0.092822 | 35.64 |
| 603026 | 2017 | -0.05 | 0.01 | 1.603837 | 2.572294   | 21.6939  | 0.123215 | 28.21 |
| 2476   | 2017 | 0.784 | 0.01 | 1.603837 | 2.572294   | 20.96675 | 0.000393 | 15.8  |
| 2476   | 2017 | -0.54 | 0.01 | 1.603837 | 2.572294   | 20.92596 | 0.000393 | 15.8  |
| 300285 | 2017 | 1.037 | 0.01 | 1.603837 | 2.572294   | 21.91388 | 0.120493 | 25.1  |
| 600308 | 2017 | -0.61 | 0.01 | 1.603837 | 2.572294   | 23.09518 | 0.092822 | 35.64 |
| 300285 | 2017 | -0.29 | 0.01 | 1.603837 | 2.572294   | 21.91388 | 0.120493 | 25.1  |

|        |      |       |      |          |            |          |          |       |
|--------|------|-------|------|----------|------------|----------|----------|-------|
| 300285 | 2017 | 1.037 | 0.01 | 1.603837 | 2.572294   | 21.91388 | 0.120493 | 25.1  |
| 600308 | 2017 | 0.213 | 0.01 | 1.603837 | 2.572294   | 23.38155 | 0.092822 | 35.64 |
| 2476   | 2017 | 0.784 | 0.01 | 1.603837 | 2.572294   | 20.96675 | 0.000393 | 15.8  |
| 2476   | 2017 | -0.54 | 0.01 | 1.603837 | 2.572294   | 20.96675 | 0.000393 | 15.8  |
| 600308 | 2017 | 0.213 | 0.01 | 1.603837 | 2.572294   | 23.38155 | 0.092822 | 35.64 |
| 600308 | 2017 | -0.74 | 0.01 | 1.603837 | 2.572294   | 23.38155 | 0.092822 | 35.64 |
| 600986 | 2017 | -0.81 | 0.01 | 1.603837 | 2.572294   | 22.71676 | 0.07896  | 12.6  |
| 300285 | 2017 | 1.037 | 0.01 | 1.603837 | 2.572294   | 21.91388 | 0.120493 | 25.1  |
| 600308 | 2017 | -0.41 | 0.01 | 1.603837 | 2.572294   | 23.38155 | 0.092822 | 35.64 |
| 300285 | 2017 | 1.037 | 0.01 | 1.603837 | 2.572294   | 21.91388 | 0.120493 | 25.1  |
| 300285 | 2017 | 0.374 | 0.01 | 1.603837 | 2.572294   | 21.91388 | 0.120493 | 25.1  |
| 603026 | 2017 | -0.05 | 0.01 | 1.603837 | 2.572294   | 21.6939  | 0.123215 | 28.21 |
| 300285 | 2017 | -0.29 | 0.01 | 1.603837 | 2.572294   | 21.91388 | 0.120493 | 25.1  |
| 300285 | 2017 | 0.833 | 0.01 | 1.603837 | 2.572294   | 21.91388 | 0.120493 | 25.1  |
| 300285 | 2017 | 1.037 | 0.01 | 1.603837 | 2.572294   | 21.91388 | 0.120493 | 25.1  |
| 300285 | 2017 | 1.037 | 0.01 | 1.603837 | 2.572294   | 21.91388 | 0.120493 | 25.1  |
| 600308 | 2017 | 0.213 | 0.01 | 1.603837 | 2.572294   | 23.38155 | 0.092822 | 35.64 |
| 600308 | 2017 | -0.1  | 0.01 | 1.603837 | 2.572294   | 23.38155 | 0.092822 | 35.64 |
| 300285 | 2017 | 0.838 | 0.01 | 1.603837 | 2.572294   | 21.91388 | 0.120493 | 25.1  |
| 603026 | 2017 | 0.128 | 0.01 | 1.603837 | 2.572294   | 21.6939  | 0.123215 | 28.21 |
| 603026 | 2017 | 0.355 | 0.01 | 1.603837 | 2.572294   | 21.57768 | 0.123215 | 28.21 |
| 603026 | 2017 | 0.128 | 0.01 | 1.603837 | 2.572294   | 21.6939  | 0.123215 | 28.21 |
| 300285 | 2017 | 1.037 | 0.01 | 1.603837 | 2.572294   | 21.78046 | 0.120493 | 25.1  |
| 600986 | 2017 | -0.81 | 0.01 | 1.603837 | 2.572294   | 23.0888  | 0.07896  | 12.6  |
| 603026 | 2017 | -0.44 | 0.01 | 1.603837 | 2.572294   | 21.6939  | 0.123215 | 28.21 |
| 603026 | 2017 | 0.055 | 0.01 | 1.603837 | 2.572294   | 21.6939  | 0.123215 | 28.21 |
| 600986 | 2017 | -0.81 | 0.01 | 1.603837 | 2.572294   | 23.0888  | 0.07896  | 12.6  |
| 2476   | 2017 | 0.254 | 0.01 | 1.603837 | 2.572294   | 20.96675 | 0.000393 | 15.8  |
| 2476   | 2017 | 0.784 | 0.01 | 1.603837 | 2.572294   | 20.96675 | 0.000393 | 15.8  |
| 600986 | 2017 | -0.81 | 0.01 | 1.603837 | 2.572294   | 23.0888  | 0.07896  | 12.6  |
| 2249   | 2017 | -0.49 | 0.02 | 0.913323 | 0.83415841 | 23.56046 | 0.046463 | 31.85 |
| 2035   | 2017 | -0.29 | 0.02 | 0.913323 | 0.83415841 | 22.16084 | 0.232785 | 13.86 |
| 2249   | 2017 | -0.49 | 0.02 | 0.913323 | 0.83415841 | 23.56046 | 0.046463 | 31.85 |
| 2249   | 2017 | -0.49 | 0.02 | 0.913323 | 0.83415841 | 23.26753 | 0.046463 | 31.85 |
| 2249   | 2017 | -0.05 | 0.02 | 0.913323 | 0.83415841 | 23.56046 | 0.046463 | 31.85 |
| 603328 | 2017 | 0.58  | 0.02 | 0.913323 | 0.83415841 | 22.4388  | 0.119349 | 74.18 |
| 2616   | 2017 | -0.73 | 0.02 | 0.913323 | 0.83415841 | 22.13975 | 0.04171  | 25.73 |
| 600872 | 2017 | -0.42 | 0.02 | 0.913323 | 0.83415841 | 22.39187 | 0.148227 | 20.14 |
| 2035   | 2017 | -0.39 | 0.02 | 0.913323 | 0.83415841 | 22.16084 | 0.232785 | 13.86 |
| 2249   | 2017 | -0.29 | 0.02 | 0.913323 | 0.83415841 | 23.56046 | 0.046463 | 31.85 |
| 2249   | 2017 | -0.16 | 0.02 | 0.913323 | 0.83415841 | 23.56046 | 0.046463 | 31.85 |
| 2745   | 2017 | -0.61 | 0.02 | 0.913323 | 0.83415841 | 23.66222 | 0.114122 | 67.32 |
| 2249   | 2017 | -0.28 | 0.02 | 0.913323 | 0.83415841 | 23.56046 | 0.046463 | 31.85 |
| 600872 | 2017 | -0.46 | 0.02 | 0.913323 | 0.83415841 | 22.39187 | 0.148227 | 20.14 |
| 2616   | 2017 | -0.51 | 0.02 | 0.913323 | 0.83415841 | 22.13975 | 0.04171  | 25.73 |
| 300562 | 2017 | 0.323 | 0.02 | 0.913323 | 0.83415841 | 20.4421  | 0.033958 | 45.5  |
| 2249   | 2017 | -0.49 | 0.02 | 0.913323 | 0.83415841 | 23.56046 | 0.046463 | 31.85 |
| 600872 | 2017 | -0.42 | 0.02 | 0.913323 | 0.83415841 | 22.39187 | 0.148227 | 20.14 |
| 2668   | 2017 | -0.35 | 0.02 | 0.913323 | 0.83415841 | 23.06644 | 0.11519  | 16.85 |
| 300562 | 2017 | 0.459 | 0.02 | 0.913323 | 0.83415841 | 20.4421  | 0.033958 | 45.5  |
| 2792   | 2017 | 0.471 | 0.02 | 0.913323 | 0.83415841 | 21.81759 | 0.057246 | 39.68 |
| 2511   | 2017 | -0.81 | 0.02 | 0.913323 | 0.83415841 | 22.47972 | 0.114675 | 29.17 |
| 2668   | 2017 | -0.35 | 0.02 | 0.913323 | 0.83415841 | 23.06644 | 0.11519  | 16.85 |
| 2745   | 2017 | -0.4  | 0.02 | 0.913323 | 0.83415841 | 23.66222 | 0.114122 | 67.32 |

|        |      |       |      |          |            |          |          |       |
|--------|------|-------|------|----------|------------|----------|----------|-------|
| 300562 | 2017 | -0.19 | 0.02 | 0.913323 | 0.83415841 | 20.4421  | 0.033958 | 45.5  |
| 2035   | 2017 | -0.05 | 0.02 | 0.913323 | 0.83415841 | 22.16084 | 0.232785 | 13.86 |
| 2511   | 2017 | -0.85 | 0.02 | 0.913323 | 0.83415841 | 22.47972 | 0.114675 | 29.17 |
| 600872 | 2017 | -0.42 | 0.02 | 0.913323 | 0.83415841 | 22.39187 | 0.148227 | 20.14 |
| 300562 | 2017 | 0.63  | 0.02 | 0.913323 | 0.83415841 | 20.4421  | 0.033958 | 45.5  |
| 300562 | 2017 | -0.42 | 0.02 | 0.913323 | 0.83415841 | 20.4421  | 0.033958 | 45.5  |
| 2511   | 2017 | -0.21 | 0.02 | 0.913323 | 0.83415841 | 22.04142 | 0.114675 | 29.17 |
| 2249   | 2017 | -0.49 | 0.02 | 0.913323 | 0.83415841 | 23.56046 | 0.046463 | 31.85 |
| 2792   | 2017 | 0.471 | 0.02 | 0.913323 | 0.83415841 | 21.81759 | 0.057246 | 39.68 |
| 2745   | 2017 | -0.56 | 0.02 | 0.913323 | 0.83415841 | 23.35764 | 0.114122 | 67.32 |
| 2035   | 2017 | -0.29 | 0.02 | 0.913323 | 0.83415841 | 22.16084 | 0.232785 | 13.86 |
| 2511   | 2017 | -0.85 | 0.02 | 0.913323 | 0.83415841 | 22.47972 | 0.114675 | 29.17 |
| 2249   | 2017 | -0.49 | 0.02 | 0.913323 | 0.83415841 | 23.56046 | 0.046463 | 31.85 |
| 300359 | 2017 | 0.842 | 0.02 | 0.913323 | 0.83415841 | 21.77456 | 0.045667 | 31.49 |
| 2745   | 2017 | -0.4  | 0.02 | 0.913323 | 0.83415841 | 23.66222 | 0.114122 | 67.32 |
| 2792   | 2017 | 0.471 | 0.02 | 0.913323 | 0.83415841 | 21.81759 | 0.057246 | 39.68 |
| 300359 | 2017 | 0.842 | 0.02 | 0.913323 | 0.83415841 | 21.77456 | 0.045667 | 31.49 |
| 2249   | 2017 | -0.3  | 0.02 | 0.913323 | 0.83415841 | 23.56046 | 0.046463 | 31.85 |
| 2249   | 2017 | -0.49 | 0.02 | 0.913323 | 0.83415841 | 23.56046 | 0.046463 | 31.85 |
| 2249   | 2017 | -0.49 | 0.02 | 0.913323 | 0.83415841 | 23.56046 | 0.046463 | 31.85 |
| 300562 | 2017 | -0.09 | 0.02 | 0.913323 | 0.83415841 | 20.4421  | 0.033958 | 45.5  |
| 300562 | 2017 | 0.63  | 0.02 | 0.913323 | 0.83415841 | 20.3434  | 0.033958 | 45.5  |
| 2745   | 2017 | -0.66 | 0.02 | 0.913323 | 0.83415841 | 23.66222 | 0.114122 | 67.32 |
| 2249   | 2017 | -0.49 | 0.02 | 0.913323 | 0.83415841 | 23.56046 | 0.046463 | 31.85 |
| 2035   | 2017 | 0.161 | 0.02 | 0.913323 | 0.83415841 | 21.93232 | 0.232785 | 13.86 |
| 2249   | 2017 | 0.173 | 0.02 | 0.913323 | 0.83415841 | 23.56046 | 0.046463 | 31.85 |
| 2616   | 2017 | -0.51 | 0.02 | 0.913323 | 0.83415841 | 22.13975 | 0.04171  | 25.73 |
| 300359 | 2017 | 0.842 | 0.02 | 0.913323 | 0.83415841 | 21.63828 | 0.045667 | 31.49 |
| 2668   | 2017 | -0.35 | 0.02 | 0.913323 | 0.83415841 | 23.06644 | 0.11519  | 16.85 |
| 2035   | 2017 | -0.39 | 0.02 | 0.913323 | 0.83415841 | 22.16084 | 0.232785 | 13.86 |
| 2792   | 2017 | 0.117 | 0.02 | 0.913323 | 0.83415841 | 21.81759 | 0.057246 | 39.68 |
| 2745   | 2017 | -0.4  | 0.02 | 0.913323 | 0.83415841 | 23.66222 | 0.114122 | 67.32 |
| 2745   | 2017 | -0.47 | 0.02 | 0.913323 | 0.83415841 | 23.66222 | 0.114122 | 67.32 |
| 600872 | 2017 | -0.07 | 0.02 | 0.913323 | 0.83415841 | 22.39187 | 0.148227 | 20.14 |
| 2745   | 2017 | -0.4  | 0.02 | 0.913323 | 0.83415841 | 23.66222 | 0.114122 | 67.32 |
| 300359 | 2017 | 0.842 | 0.02 | 0.913323 | 0.83415841 | 21.77456 | 0.045667 | 31.49 |
| 2249   | 2017 | -0.49 | 0.02 | 0.913323 | 0.83415841 | 23.56046 | 0.046463 | 31.85 |
| 2035   | 2017 | -0.29 | 0.02 | 0.913323 | 0.83415841 | 22.16084 | 0.232785 | 13.86 |
| 2035   | 2017 | -0.53 | 0.02 | 0.913323 | 0.83415841 | 22.16084 | 0.232785 | 13.86 |
| 600872 | 2017 | -0.42 | 0.02 | 0.913323 | 0.83415841 | 21.95364 | 0.148227 | 20.14 |
| 2745   | 2017 | -0.61 | 0.02 | 0.913323 | 0.83415841 | 23.66222 | 0.114122 | 67.32 |
| 2511   | 2017 | -0.74 | 0.02 | 0.913323 | 0.83415841 | 22.47972 | 0.114675 | 29.17 |
| 2249   | 2017 | -0.28 | 0.02 | 0.913323 | 0.83415841 | 23.56046 | 0.046463 | 31.85 |
| 300562 | 2017 | -0.42 | 0.02 | 0.913323 | 0.83415841 | 20.4421  | 0.033958 | 45.5  |
| 2035   | 2017 | -0.27 | 0.02 | 0.913323 | 0.83415841 | 22.16084 | 0.232785 | 13.86 |
| 2745   | 2017 | -0.54 | 0.02 | 0.913323 | 0.83415841 | 23.66222 | 0.114122 | 67.32 |
| 2035   | 2017 | -0.27 | 0.02 | 0.913323 | 0.83415841 | 22.16084 | 0.232785 | 13.86 |
| 2668   | 2017 | -0.35 | 0.02 | 0.913323 | 0.83415841 | 23.06644 | 0.11519  | 16.85 |
| 2616   | 2017 | -0.65 | 0.02 | 0.913323 | 0.83415841 | 22.13975 | 0.04171  | 25.73 |
| 2511   | 2017 | -0.85 | 0.02 | 0.913323 | 0.83415841 | 22.47972 | 0.114675 | 29.17 |
| 603328 | 2017 | 0.58  | 0.02 | 0.913323 | 0.83415841 | 22.4388  | 0.119349 | 74.18 |
| 300562 | 2017 | 0.63  | 0.02 | 0.913323 | 0.83415841 | 20.4421  | 0.033958 | 45.5  |
| 2249   | 2017 | -0.49 | 0.02 | 0.913323 | 0.83415841 | 23.56046 | 0.046463 | 31.85 |
| 2668   | 2017 | -0.35 | 0.02 | 0.913323 | 0.83415841 | 22.68123 | 0.11519  | 16.85 |

|        |      |       |      |          |            |          |          |       |
|--------|------|-------|------|----------|------------|----------|----------|-------|
| 300359 | 2017 | 0.842 | 0.02 | 0.913323 | 0.83415841 | 21.77456 | 0.045667 | 31.49 |
| 2249   | 2017 | 0.836 | 0.02 | 0.913323 | 0.83415841 | 23.56046 | 0.046463 | 31.85 |
| 2668   | 2017 | -0.35 | 0.02 | 0.913323 | 0.83415841 | 23.06644 | 0.11519  | 16.85 |
| 2249   | 2017 | -0.49 | 0.02 | 0.913323 | 0.83415841 | 23.56046 | 0.046463 | 31.85 |
| 2616   | 2017 | -0.73 | 0.02 | 0.913323 | 0.83415841 | 21.79005 | 0.04171  | 25.73 |
| 600872 | 2017 | -0.42 | 0.02 | 0.913323 | 0.83415841 | 22.39187 | 0.148227 | 20.14 |
| 2249   | 2017 | -0.32 | 0.02 | 0.913323 | 0.83415841 | 23.56046 | 0.046463 | 31.85 |
| 2035   | 2017 | -0.52 | 0.02 | 0.913323 | 0.83415841 | 22.16084 | 0.232785 | 13.86 |
| 2792   | 2017 | 0.125 | 0.02 | 0.913323 | 0.83415841 | 21.81759 | 0.057246 | 39.68 |
| 2792   | 2017 | 0.117 | 0.02 | 0.913323 | 0.83415841 | 21.77365 | 0.057246 | 39.68 |
| 603328 | 2017 | 0.58  | 0.02 | 0.913323 | 0.83415841 | 22.40904 | 0.119349 | 74.18 |
| 600740 | 2017 | -0.2  | 0    | 0.287682 | 0.08276083 | 22.97726 | 0.034198 | 14.22 |
| 600740 | 2017 | -0.2  | 0    | 0.287682 | 0.08276083 | 23.13247 | 0.034198 | 14.22 |
| 600740 | 2017 | -0.2  | 0    | 0.287682 | 0.08276083 | 23.13247 | 0.034198 | 14.22 |
| 2470   | 2017 | 0.596 | 0.01 | 1.562437 | 2.4412083  | 23.37016 | 0.066673 | 38.85 |
| 915    | 2017 | 0.618 | 0.01 | 1.562437 | 2.4412083  | 21.74392 | 0.203202 | 20.72 |
| 2470   | 2017 | 0.557 | 0.01 | 1.562437 | 2.4412083  | 23.70241 | 0.066673 | 38.85 |
| 2470   | 2017 | 0.425 | 0.01 | 1.562437 | 2.4412083  | 23.70241 | 0.066673 | 38.85 |
| 2588   | 2017 | -0.51 | 0.01 | 1.562437 | 2.4412083  | 22.72008 | 0.061377 | 22.86 |
| 2588   | 2017 | 0.116 | 0.01 | 1.562437 | 2.4412083  | 22.72008 | 0.061377 | 22.86 |
| 2470   | 2017 | 0.596 | 0.01 | 1.562437 | 2.4412083  | 23.70241 | 0.066673 | 38.85 |
| 2470   | 2017 | 0.596 | 0.01 | 1.562437 | 2.4412083  | 23.70241 | 0.066673 | 38.85 |
| 915    | 2017 | -0.44 | 0.01 | 1.562437 | 2.4412083  | 21.74392 | 0.203202 | 20.72 |
| 2588   | 2017 | -0.13 | 0.01 | 1.562437 | 2.4412083  | 22.72008 | 0.061377 | 22.86 |
| 2588   | 2017 | -0.51 | 0.01 | 1.562437 | 2.4412083  | 22.72008 | 0.061377 | 22.86 |
| 2588   | 2017 | 0.116 | 0.01 | 1.562437 | 2.4412083  | 22.72008 | 0.061377 | 22.86 |
| 2588   | 2017 | 0.116 | 0.01 | 1.562437 | 2.4412083  | 22.72008 | 0.061377 | 22.86 |
| 2470   | 2017 | 0.596 | 0.01 | 1.562437 | 2.4412083  | 23.70241 | 0.066673 | 38.85 |
| 2470   | 2017 | 0.494 | 0.01 | 1.562437 | 2.4412083  | 23.70241 | 0.066673 | 38.85 |
| 915    | 2017 | -0.71 | 0.01 | 1.562437 | 2.4412083  | 21.74392 | 0.203202 | 20.72 |
| 2470   | 2017 | 0.264 | 0.01 | 1.562437 | 2.4412083  | 23.70241 | 0.066673 | 38.85 |
| 2588   | 2017 | 0.116 | 0.01 | 1.562437 | 2.4412083  | 22.72008 | 0.061377 | 22.86 |
| 2470   | 2017 | 0.596 | 0.01 | 1.562437 | 2.4412083  | 23.70241 | 0.066673 | 38.85 |
| 2588   | 2017 | 0.116 | 0.01 | 1.562437 | 2.4412083  | 22.72008 | 0.061377 | 22.86 |
| 2588   | 2017 | -0.26 | 0.01 | 1.562437 | 2.4412083  | 22.55843 | 0.061377 | 22.86 |
| 915    | 2017 | 0.136 | 0.01 | 1.562437 | 2.4412083  | 21.74392 | 0.203202 | 20.72 |
| 915    | 2017 | -0.71 | 0.01 | 1.562437 | 2.4412083  | 21.74392 | 0.203202 | 20.72 |
| 2470   | 2017 | 0.596 | 0.01 | 1.562437 | 2.4412083  | 23.70241 | 0.066673 | 38.85 |
| 2588   | 2017 | -0.51 | 0.01 | 1.562437 | 2.4412083  | 22.72008 | 0.061377 | 22.86 |
| 2588   | 2017 | 0.116 | 0.01 | 1.562437 | 2.4412083  | 22.72008 | 0.061377 | 22.86 |
| 2588   | 2017 | 0.116 | 0.01 | 1.562437 | 2.4412083  | 22.72008 | 0.061377 | 22.86 |
| 2588   | 2017 | 0.206 | 0.01 | 1.562437 | 2.4412083  | 22.72008 | 0.061377 | 22.86 |
| 915    | 2017 | -0.04 | 0.01 | 1.562437 | 2.4412083  | 21.74392 | 0.203202 | 20.72 |
| 2470   | 2017 | 0.596 | 0.01 | 1.562437 | 2.4412083  | 23.70241 | 0.066673 | 38.85 |
| 915    | 2017 | 0.618 | 0.01 | 1.562437 | 2.4412083  | 20.49526 | 0.203202 | 20.72 |
| 2588   | 2017 | 0.116 | 0.01 | 1.562437 | 2.4412083  | 22.72008 | 0.061377 | 22.86 |
| 915    | 2017 | -0.44 | 0.01 | 1.562437 | 2.4412083  | 21.74392 | 0.203202 | 20.72 |
| 2588   | 2017 | 0.116 | 0.01 | 1.562437 | 2.4412083  | 22.72008 | 0.061377 | 22.86 |
| 2470   | 2017 | 0.425 | 0.01 | 1.562437 | 2.4412083  | 23.70241 | 0.066673 | 38.85 |
| 915    | 2017 | 0.353 | 0.01 | 1.562437 | 2.4412083  | 21.74392 | 0.203202 | 20.72 |
| 2588   | 2017 | -0.24 | 0.01 | 1.562437 | 2.4412083  | 22.72008 | 0.061377 | 22.86 |
| 2428   | 2017 | 0.621 | 0    | 0.017602 | 0.00030984 | 21.40099 | 0.004197 | 13.72 |
| 2428   | 2017 | 0.621 | 0    | 0.017602 | 0.00030984 | 21.40099 | 0.004197 | 13.72 |
| 2428   | 2017 | -0.37 | 0    | 0.017602 | 0.00030984 | 21.40099 | 0.004197 | 13.72 |

|        |      |       |      |          |            |          |          |       |
|--------|------|-------|------|----------|------------|----------|----------|-------|
| 2428   | 2017 | -0.37 | 0    | 0.017602 | 0.00030984 | 21.40099 | 0.004197 | 13.72 |
| 2428   | 2017 | -0.3  | 0    | 0.017602 | 0.00030984 | 21.40099 | 0.004197 | 13.72 |
| 2428   | 2017 | -0.23 | 0    | 0.017602 | 0.00030984 | 21.33899 | 0.004197 | 13.72 |
| 2428   | 2017 | 0.621 | 0    | 0.017602 | 0.00030984 | 21.40099 | 0.004197 | 13.72 |
| 2428   | 2017 | -0.37 | 0    | 0.017602 | 0.00030984 | 21.40099 | 0.004197 | 13.72 |
| 2428   | 2017 | -0.37 | 0    | 0.017602 | 0.00030984 | 21.40099 | 0.004197 | 13.72 |
| 600303 | 2017 | -0.8  | 0    | 0.877951 | 0.77079808 | 22.77201 | 0.096952 | 15.99 |
| 600303 | 2017 | -0.8  | 0    | 0.877951 | 0.77079808 | 22.77201 | 0.096952 | 15.99 |
| 600303 | 2017 | -0.54 | 0    | 0.877951 | 0.77079808 | 22.77201 | 0.096952 | 15.99 |
| 600303 | 2017 | -0.8  | 0    | 0.877951 | 0.77079808 | 22.77201 | 0.096952 | 15.99 |
| 600303 | 2017 | -0.54 | 0    | 0.877951 | 0.77079808 | 22.50002 | 0.096952 | 15.99 |
| 600303 | 2017 | -0.54 | 0    | 0.877951 | 0.77079808 | 22.77201 | 0.096952 | 15.99 |
| 600303 | 2017 | -0.47 | 0    | 0.877951 | 0.77079808 | 22.77201 | 0.096952 | 15.99 |
| 600303 | 2017 | -0.62 | 0    | 0.877951 | 0.77079808 | 22.77201 | 0.096952 | 15.99 |
| 600291 | 2017 | -0.99 | 0    | 1.351408 | 1.8263032  | 25.74206 | 0.085888 | 10.75 |
| 600291 | 2017 | -0.99 | 0    | 1.351408 | 1.8263032  | 23.58285 | 0.085888 | 10.75 |
| 601216 | 2017 | 0.119 | 0    | 1.351408 | 1.8263032  | 23.83162 | 0.134952 | 31.95 |
| 601216 | 2017 | -0.08 | 0    | 1.351408 | 1.8263032  | 23.43776 | 0.134952 | 31.95 |
| 601216 | 2017 | 0.034 | 0    | 1.351408 | 1.8263032  | 23.83162 | 0.134952 | 31.95 |
| 601216 | 2017 | 0.696 | 0    | 1.351408 | 1.8263032  | 23.83162 | 0.134952 | 31.95 |
| 600291 | 2017 | -0.99 | 0    | 1.351408 | 1.8263032  | 25.74206 | 0.085888 | 10.75 |
| 601216 | 2017 | 0.119 | 0    | 1.351408 | 1.8263032  | 23.83162 | 0.134952 | 31.95 |
| 601216 | 2017 | 0.001 | 0    | 1.351408 | 1.8263032  | 23.83162 | 0.134952 | 31.95 |
| 601216 | 2017 | 0.696 | 0    | 1.351408 | 1.8263032  | 23.83162 | 0.134952 | 31.95 |
| 600291 | 2017 | -0.99 | 0    | 1.351408 | 1.8263032  | 25.74206 | 0.085888 | 10.75 |
| 2205   | 2017 | 0.075 | 0.01 | 0.405465 | 0.16440195 | 21.65057 | 0.015637 | 30.21 |
| 2302   | 2017 | 0.253 | 0.01 | 0.405465 | 0.16440195 | 23.62601 | 0.021223 | 31.43 |
| 2202   | 2017 | 0.487 | 0.01 | 0.405465 | 0.16440195 | 25.01082 | 0.134134 | 18.24 |
| 813    | 2017 | 0.719 | 0.01 | 0.405465 | 0.16440195 | 23.02158 | 0.17497  | 30.14 |
| 2092   | 2017 | -0.29 | 0.01 | 0.405465 | 0.16440195 | 24.74194 | 0.128113 | 19.39 |
| 2302   | 2017 | -0.19 | 0.01 | 0.405465 | 0.16440195 | 23.62601 | 0.021223 | 31.43 |
| 2202   | 2017 | 0.057 | 0.01 | 0.405465 | 0.16440195 | 25.01082 | 0.134134 | 18.24 |
| 2202   | 2017 | 0.667 | 0.01 | 0.405465 | 0.16440195 | 25.01082 | 0.134134 | 18.24 |
| 601069 | 2017 | 0.397 | 0.01 | 0.405465 | 0.16440195 | 21.6015  | 0.012974 | 68.18 |
| 2202   | 2017 | 0.133 | 0.01 | 0.405465 | 0.16440195 | 25.01082 | 0.134134 | 18.24 |
| 300159 | 2017 | 0.156 | 0.01 | 0.405465 | 0.16440195 | 22.91639 | 0.062131 | 15.5  |
| 2092   | 2017 | -0.87 | 0.01 | 0.405465 | 0.16440195 | 24.74194 | 0.128113 | 19.39 |
| 2202   | 2017 | 0.261 | 0.01 | 0.405465 | 0.16440195 | 25.01082 | 0.134134 | 18.24 |
| 2302   | 2017 | -0.14 | 0.01 | 0.405465 | 0.16440195 | 23.62601 | 0.021223 | 31.43 |
| 2202   | 2017 | 0.531 | 0.01 | 0.405465 | 0.16440195 | 24.46815 | 0.134134 | 18.24 |
| 2100   | 2017 | 0.237 | 0.01 | 0.405465 | 0.16440195 | 22.49361 | 0.132162 | 29.47 |
| 2092   | 2017 | -0.87 | 0.01 | 0.405465 | 0.16440195 | 24.74194 | 0.128113 | 19.39 |
| 600256 | 2017 | -0.86 | 0.01 | 0.405465 | 0.16440195 | 24.53201 | 0.033663 | 42.12 |
| 2100   | 2017 | -0.82 | 0.01 | 0.405465 | 0.16440195 | 22.25103 | 0.132162 | 29.47 |
| 2302   | 2017 | 0.695 | 0.01 | 0.405465 | 0.16440195 | 23.62601 | 0.021223 | 31.43 |
| 2202   | 2017 | 0.814 | 0.01 | 0.405465 | 0.16440195 | 25.01082 | 0.134134 | 18.24 |
| 2302   | 2017 | -0.46 | 0.01 | 0.405465 | 0.16440195 | 23.62601 | 0.021223 | 31.43 |
| 600581 | 2017 | -0.7  | 0.01 | 0.405465 | 0.16440195 | 23.6465  | 0.302158 | 50.02 |
| 2302   | 2017 | -0.63 | 0.01 | 0.405465 | 0.16440195 | 23.62601 | 0.021223 | 31.43 |
| 600545 | 2017 | -0.09 | 0.01 | 0.405465 | 0.16440195 | 23.3996  | 0.115215 | 46.38 |
| 600337 | 2017 | -0.66 | 0.01 | 0.405465 | 0.16440195 | 22.65837 | 0.074083 | 23.49 |
| 600337 | 2017 | -0.76 | 0.01 | 0.405465 | 0.16440195 | 22.77896 | 0.074083 | 23.49 |
| 600581 | 2017 | -0.7  | 0.01 | 0.405465 | 0.16440195 | 23.6465  | 0.302158 | 50.02 |
| 813    | 2017 | 0.719 | 0.01 | 0.405465 | 0.16440195 | 22.36012 | 0.17497  | 30.14 |



|        |      |       |      |          |            |          |          |       |
|--------|------|-------|------|----------|------------|----------|----------|-------|
| 600256 | 2017 | -0.99 | 0.01 | 0.405465 | 0.16440195 | 24.53201 | 0.033663 | 42.12 |
| 813    | 2017 | 0.719 | 0.01 | 0.405465 | 0.16440195 | 22.36012 | 0.17497  | 30.14 |
| 2202   | 2017 | 0.543 | 0.01 | 0.405465 | 0.16440195 | 25.01082 | 0.134134 | 18.24 |
| 600419 | 2017 | -0.77 | 0.01 | 0.405465 | 0.16440195 | 21.08056 | 0.112687 | 36.83 |
| 600256 | 2017 | -0.99 | 0.01 | 0.405465 | 0.16440195 | 23.7611  | 0.033663 | 42.12 |
| 2302   | 2017 | -0.3  | 0.01 | 0.405465 | 0.16440195 | 23.62601 | 0.021223 | 31.43 |
| 600888 | 2017 | 0.395 | 0.01 | 0.405465 | 0.16440195 | 23.03931 | 0.034717 | 28.14 |
| 600256 | 2017 | -0.39 | 0.01 | 0.405465 | 0.16440195 | 24.53201 | 0.033663 | 42.12 |
| 600581 | 2017 | -0.7  | 0.01 | 0.405465 | 0.16440195 | 23.6465  | 0.302158 | 50.02 |
| 600419 | 2017 | -0.77 | 0.01 | 0.405465 | 0.16440195 | 21.08056 | 0.112687 | 36.83 |
| 2307   | 2017 | -0.98 | 0.01 | 0.405465 | 0.16440195 | 23.69473 | 0.015586 | 47.13 |
| 2307   | 2017 | -0.41 | 0.01 | 0.405465 | 0.16440195 | 23.69473 | 0.015586 | 47.13 |
| 2100   | 2017 | 0.355 | 0.01 | 0.405465 | 0.16440195 | 22.49361 | 0.132162 | 29.47 |
| 600888 | 2017 | -0.15 | 0.01 | 0.405465 | 0.16440195 | 23.03931 | 0.034717 | 28.14 |
| 2302   | 2017 | -0.34 | 0.01 | 0.405465 | 0.16440195 | 23.62601 | 0.021223 | 31.43 |
| 300159 | 2017 | 0.021 | 0.01 | 0.405465 | 0.16440195 | 22.91639 | 0.062131 | 15.5  |
| 2100   | 2017 | -0.82 | 0.01 | 0.405465 | 0.16440195 | 22.49361 | 0.132162 | 29.47 |
| 2205   | 2017 | 0.17  | 0.01 | 0.405465 | 0.16440195 | 21.65057 | 0.015637 | 30.21 |
| 2307   | 2017 | -0.41 | 0.01 | 0.405465 | 0.16440195 | 23.69473 | 0.015586 | 47.13 |
| 2202   | 2017 | 0.445 | 0.01 | 0.405465 | 0.16440195 | 25.01082 | 0.134134 | 18.24 |
| 2205   | 2017 | -0.49 | 0.01 | 0.405465 | 0.16440195 | 21.65057 | 0.015637 | 30.21 |
| 2202   | 2017 | 0.618 | 0.01 | 0.405465 | 0.16440195 | 25.01082 | 0.134134 | 18.24 |
| 2092   | 2017 | -0.87 | 0.01 | 0.405465 | 0.16440195 | 24.74194 | 0.128113 | 19.39 |
| 2205   | 2017 | -0.49 | 0.01 | 0.405465 | 0.16440195 | 21.65057 | 0.015637 | 30.21 |
| 2100   | 2017 | 0.355 | 0.01 | 0.405465 | 0.16440195 | 22.49361 | 0.132162 | 29.47 |
| 300159 | 2017 | 0.021 | 0.01 | 0.405465 | 0.16440195 | 22.46735 | 0.062131 | 15.5  |
| 813    | 2017 | 0.719 | 0.01 | 0.405465 | 0.16440195 | 22.36012 | 0.17497  | 30.14 |
| 813    | 2017 | 0.719 | 0.01 | 0.405465 | 0.16440195 | 22.36012 | 0.17497  | 30.14 |
| 2092   | 2017 | -0.47 | 0.01 | 0.405465 | 0.16440195 | 24.74194 | 0.128113 | 19.39 |
| 600545 | 2017 | -0.39 | 0.01 | 0.405465 | 0.16440195 | 23.3996  | 0.115215 | 46.38 |
| 2092   | 2017 | -0.21 | 0.01 | 0.405465 | 0.16440195 | 24.74194 | 0.128113 | 19.39 |
| 2205   | 2017 | 0.527 | 0.01 | 0.405465 | 0.16440195 | 21.65057 | 0.015637 | 30.21 |
| 600888 | 2017 | 0.837 | 0.01 | 0.405465 | 0.16440195 | 23.03931 | 0.034717 | 28.14 |
| 2202   | 2017 | 1.193 | 0.01 | 0.405465 | 0.16440195 | 25.01082 | 0.134134 | 18.24 |
| 300159 | 2017 | 0.021 | 0.01 | 0.405465 | 0.16440195 | 22.91639 | 0.062131 | 15.5  |
| 2202   | 2017 | -0.13 | 0.01 | 0.405465 | 0.16440195 | 25.01082 | 0.134134 | 18.24 |
| 300159 | 2017 | 0.021 | 0.01 | 0.405465 | 0.16440195 | 22.91639 | 0.062131 | 15.5  |
| 2302   | 2017 | -0.63 | 0.01 | 0.405465 | 0.16440195 | 23.62601 | 0.021223 | 31.43 |
| 2307   | 2017 | -0.48 | 0.01 | 0.405465 | 0.16440195 | 23.31781 | 0.015586 | 47.13 |
| 2307   | 2017 | -0.41 | 0.01 | 0.405465 | 0.16440195 | 23.69473 | 0.015586 | 47.13 |
| 2302   | 2017 | -0.05 | 0.01 | 0.405465 | 0.16440195 | 23.62601 | 0.021223 | 31.43 |
| 813    | 2017 | 0.719 | 0.01 | 0.405465 | 0.16440195 | 22.36012 | 0.17497  | 30.14 |
| 2092   | 2017 | -0.61 | 0.01 | 0.405465 | 0.16440195 | 24.20591 | 0.128113 | 19.39 |
| 2202   | 2017 | 0.199 | 0.01 | 0.405465 | 0.16440195 | 25.01082 | 0.134134 | 18.24 |
| 300159 | 2017 | 0.021 | 0.01 | 0.405465 | 0.16440195 | 22.91639 | 0.062131 | 15.5  |
| 2302   | 2017 | 0.316 | 0.01 | 0.405465 | 0.16440195 | 23.62601 | 0.021223 | 31.43 |
| 300159 | 2017 | 0.122 | 0.01 | 0.405465 | 0.16440195 | 22.91639 | 0.062131 | 15.5  |
| 600337 | 2017 | 0.563 | 0.01 | 0.405465 | 0.16440195 | 22.77896 | 0.074083 | 23.49 |
| 2202   | 2017 | 0.187 | 0.01 | 0.405465 | 0.16440195 | 25.01082 | 0.134134 | 18.24 |
| 2092   | 2017 | -0.29 | 0.01 | 0.405465 | 0.16440195 | 24.74194 | 0.128113 | 19.39 |
| 2100   | 2017 | 0.237 | 0.01 | 0.405465 | 0.16440195 | 22.49361 | 0.132162 | 29.47 |
| 600256 | 2017 | -0.99 | 0.01 | 0.405465 | 0.16440195 | 24.53201 | 0.033663 | 42.12 |
| 600256 | 2017 | -0.46 | 0.01 | 0.405465 | 0.16440195 | 24.53201 | 0.033663 | 42.12 |
| 2202   | 2017 | 0.564 | 0.01 | 0.405465 | 0.16440195 | 25.01082 | 0.134134 | 18.24 |

|        |      |       |      |          |            |          |          |       |
|--------|------|-------|------|----------|------------|----------|----------|-------|
| 2205   | 2017 | 0.17  | 0.01 | 0.405465 | 0.16440195 | 21.65057 | 0.015637 | 30.21 |
| 300159 | 2017 | 0.021 | 0.01 | 0.405465 | 0.16440195 | 22.91639 | 0.062131 | 15.5  |
| 600545 | 2017 | 0.666 | 0.01 | 0.405465 | 0.16440195 | 23.3996  | 0.115215 | 46.38 |
| 600888 | 2017 | -0.22 | 0.01 | 0.405465 | 0.16440195 | 23.03931 | 0.034717 | 28.14 |
| 2302   | 2017 | -0.63 | 0.01 | 0.405465 | 0.16440195 | 23.62601 | 0.021223 | 31.43 |
| 600888 | 2017 | -0.29 | 0.01 | 0.405465 | 0.16440195 | 22.97633 | 0.034717 | 28.14 |
| 600337 | 2017 | -0.66 | 0.01 | 0.405465 | 0.16440195 | 22.65837 | 0.074083 | 23.49 |
| 2302   | 2017 | 0.43  | 0.01 | 0.405465 | 0.16440195 | 23.62601 | 0.021223 | 31.43 |
| 600337 | 2017 | -0.76 | 0.01 | 0.405465 | 0.16440195 | 22.65837 | 0.074083 | 23.49 |
| 600256 | 2017 | 0.337 | 0.01 | 0.405465 | 0.16440195 | 24.53201 | 0.033663 | 42.12 |
| 600337 | 2017 | -0.58 | 0.01 | 0.405465 | 0.16440195 | 22.77896 | 0.074083 | 23.49 |
| 2202   | 2017 | 0.487 | 0.01 | 0.405465 | 0.16440195 | 25.01082 | 0.134134 | 18.24 |
| 600888 | 2017 | 0.837 | 0.01 | 0.405465 | 0.16440195 | 23.03931 | 0.034717 | 28.14 |
| 600419 | 2017 | -0.77 | 0.01 | 0.405465 | 0.16440195 | 20.69289 | 0.112687 | 36.83 |
| 2302   | 2017 | 0.574 | 0.01 | 0.405465 | 0.16440195 | 23.62601 | 0.021223 | 31.43 |
| 2307   | 2017 | -0.98 | 0.01 | 0.405465 | 0.16440195 | 23.69473 | 0.015586 | 47.13 |
| 600337 | 2017 | 0.563 | 0.01 | 0.405465 | 0.16440195 | 22.65837 | 0.074083 | 23.49 |
| 2302   | 2017 | 0.43  | 0.01 | 0.405465 | 0.16440195 | 23.62601 | 0.021223 | 31.43 |
| 601069 | 2017 | 0.397 | 0.01 | 0.405465 | 0.16440195 | 21.62947 | 0.012974 | 68.18 |
| 600256 | 2017 | -0.39 | 0.01 | 0.405465 | 0.16440195 | 24.53201 | 0.033663 | 42.12 |
| 2307   | 2017 | -0.41 | 0.01 | 0.405465 | 0.16440195 | 23.69473 | 0.015586 | 47.13 |
| 2100   | 2017 | 0.237 | 0.01 | 0.405465 | 0.16440195 | 22.49361 | 0.132162 | 29.47 |
| 2302   | 2017 | -0.06 | 0.01 | 0.405465 | 0.16440195 | 23.62601 | 0.021223 | 31.43 |
| 600545 | 2017 | 0.666 | 0.01 | 0.405465 | 0.16440195 | 23.07029 | 0.115215 | 46.38 |
| 601069 | 2017 | 0.397 | 0.01 | 0.405465 | 0.16440195 | 21.62947 | 0.012974 | 68.18 |
| 2092   | 2017 | -0.48 | 0.01 | 0.405465 | 0.16440195 | 24.74194 | 0.128113 | 19.39 |
| 2205   | 2017 | -0.49 | 0.01 | 0.405465 | 0.16440195 | 21.65057 | 0.015637 | 30.21 |
| 2205   | 2017 | 0.17  | 0.01 | 0.405465 | 0.16440195 | 21.65057 | 0.015637 | 30.21 |
| 2092   | 2017 | -0.87 | 0.01 | 0.405465 | 0.16440195 | 24.74194 | 0.128113 | 19.39 |
| 2307   | 2017 | -0.41 | 0.01 | 0.405465 | 0.16440195 | 23.69473 | 0.015586 | 47.13 |
| 300159 | 2017 | -0.21 | 0.01 | 0.405465 | 0.16440195 | 22.91639 | 0.062131 | 15.5  |
| 2302   | 2017 | -0.4  | 0.01 | 0.405465 | 0.16440195 | 23.62601 | 0.021223 | 31.43 |
| 600545 | 2017 | 0.004 | 0.01 | 0.405465 | 0.16440195 | 23.3996  | 0.115215 | 46.38 |
| 2205   | 2017 | 0.17  | 0.01 | 0.405465 | 0.16440195 | 21.39594 | 0.015637 | 30.21 |
| 2202   | 2017 | 1.193 | 0.01 | 0.405465 | 0.16440195 | 25.01082 | 0.134134 | 18.24 |
| 600545 | 2017 | 0.666 | 0.01 | 0.405465 | 0.16440195 | 23.3996  | 0.115215 | 46.38 |
| 2202   | 2017 | 0.528 | 0.01 | 0.405465 | 0.16440195 | 25.01082 | 0.134134 | 18.24 |
| 2205   | 2017 | 0.17  | 0.01 | 0.405465 | 0.16440195 | 21.65057 | 0.015637 | 30.21 |
| 600888 | 2017 | 0.121 | 0.01 | 0.405465 | 0.16440195 | 23.03931 | 0.034717 | 28.14 |
| 2302   | 2017 | 0.297 | 0.01 | 0.405465 | 0.16440195 | 23.62601 | 0.021223 | 31.43 |
| 2100   | 2017 | 0.237 | 0.01 | 0.405465 | 0.16440195 | 22.49361 | 0.132162 | 29.47 |
| 2100   | 2017 | 0.237 | 0.01 | 0.405465 | 0.16440195 | 22.49361 | 0.132162 | 29.47 |
| 2092   | 2017 | -0.87 | 0.01 | 0.405465 | 0.16440195 | 24.74194 | 0.128113 | 19.39 |
| 600888 | 2017 | 0.395 | 0.01 | 0.405465 | 0.16440195 | 23.03931 | 0.034717 | 28.14 |
| 2302   | 2017 | 0.134 | 0.01 | 0.405465 | 0.16440195 | 22.91313 | 0.021223 | 31.43 |
| 2205   | 2017 | -0.3  | 0.01 | 0.405465 | 0.16440195 | 21.65057 | 0.015637 | 30.21 |
| 600256 | 2017 | -0.39 | 0.01 | 0.405465 | 0.16440195 | 24.53201 | 0.033663 | 42.12 |
| 603333 | 2017 | 0.124 | 0.01 | 1.434748 | 2.0585006  | 21.31672 | 0.011891 | 47.98 |
| 603333 | 2017 | 0.124 | 0.01 | 1.434748 | 2.0585006  | 21.31672 | 0.011891 | 47.98 |
| 603333 | 2017 | 0.124 | 0.01 | 1.434748 | 2.0585006  | 21.31672 | 0.011891 | 47.98 |
| 603333 | 2017 | 0.124 | 0.01 | 1.434748 | 2.0585006  | 21.25692 | 0.011891 | 47.98 |
| 603333 | 2017 | 0.124 | 0.01 | 1.434748 | 2.0585006  | 21.31672 | 0.011891 | 47.98 |
| 300498 | 2017 | -0.29 | 0.02 | 0.005528 | 0.00003056 | 24.61589 | 0.209745 | 7.84  |
| 300498 | 2017 | -0.24 | 0.02 | 0.005528 | 0.00003056 | 24.61589 | 0.209745 | 7.84  |

|        |      |       |      |          |            |          |          |       |
|--------|------|-------|------|----------|------------|----------|----------|-------|
| 300498 | 2017 | -0.29 | 0.02 | 0.005528 | 0.00003056 | 24.61589 | 0.209745 | 7.84  |
| 300498 | 2017 | -0.29 | 0.02 | 0.005528 | 0.00003056 | 24.61589 | 0.209745 | 7.84  |
| 300498 | 2017 | 0.392 | 0.02 | 0.005528 | 0.00003056 | 24.61589 | 0.209745 | 7.84  |
| 300498 | 2017 | -0.29 | 0.02 | 0.005528 | 0.00003056 | 24.61589 | 0.209745 | 7.84  |
| 300498 | 2017 | -0.21 | 0.02 | 0.005528 | 0.00003056 | 24.61589 | 0.209745 | 7.84  |
| 300498 | 2017 | -0.05 | 0.02 | 0.005528 | 0.00003056 | 24.61589 | 0.209745 | 7.84  |
| 300498 | 2017 | -0.29 | 0.02 | 0.005528 | 0.00003056 | 24.61589 | 0.209745 | 7.84  |
| 300498 | 2017 | 0.392 | 0.02 | 0.005528 | 0.00003056 | 24.61589 | 0.209745 | 7.84  |
| 300498 | 2017 | -0.49 | 0.02 | 0.005528 | 0.00003056 | 24.61589 | 0.209745 | 7.84  |
| 300498 | 2017 | 0.392 | 0.02 | 0.005528 | 0.00003056 | 24.61589 | 0.209745 | 7.84  |
| 300498 | 2017 | -0.55 | 0.02 | 0.005528 | 0.00003056 | 24.61589 | 0.209745 | 7.84  |
| 300498 | 2017 | -0.29 | 0.02 | 0.005528 | 0.00003056 | 24.61589 | 0.209745 | 7.84  |
| 300498 | 2017 | -0.29 | 0.02 | 0.005528 | 0.00003056 | 24.61589 | 0.209745 | 7.84  |
| 300498 | 2017 | -0.29 | 0.02 | 0.005528 | 0.00003056 | 24.61589 | 0.209745 | 7.84  |
| 300498 | 2017 | 0.392 | 0.02 | 0.005528 | 0.00003056 | 24.29632 | 0.209745 | 7.84  |
| 300498 | 2017 | -0.29 | 0.02 | 0.005528 | 0.00003056 | 24.61589 | 0.209745 | 7.84  |
| 300498 | 2017 | -0.21 | 0.02 | 0.005528 | 0.00003056 | 24.61589 | 0.209745 | 7.84  |
| 596    | 2017 | -0.6  | 0.04 | 0.510826 | 0.26094302 | 23.04102 | 0.17325  | 53.89 |
| 596    | 2017 | -0.6  | 0.04 | 0.510826 | 0.26094302 | 22.89941 | 0.17325  | 53.89 |
| 596    | 2017 | -0.71 | 0.04 | 0.510826 | 0.26094302 | 23.04102 | 0.17325  | 53.89 |
| 596    | 2017 | -0.71 | 0.04 | 0.510826 | 0.26094302 | 23.04102 | 0.17325  | 53.89 |
| 596    | 2017 | -0.52 | 0.04 | 0.510826 | 0.26094302 | 23.04102 | 0.17325  | 53.89 |
| 596    | 2017 | -0.38 | 0.04 | 0.510826 | 0.26094302 | 23.04102 | 0.17325  | 53.89 |
| 596    | 2017 | -0.55 | 0.04 | 0.510826 | 0.26094302 | 23.04102 | 0.17325  | 53.89 |
| 596    | 2017 | -0.37 | 0.04 | 0.510826 | 0.26094302 | 23.04102 | 0.17325  | 53.89 |
| 596    | 2017 | -0.6  | 0.04 | 0.510826 | 0.26094302 | 23.04102 | 0.17325  | 53.89 |
| 596    | 2017 | -0.45 | 0.04 | 0.510826 | 0.26094302 | 23.04102 | 0.17325  | 53.89 |
| 587    | 2017 | -0.96 | 0.02 | 0.047712 | 0.00227648 | 24.3089  | 0.112001 | 37.04 |
| 587    | 2017 | -0.96 | 0.02 | 0.047712 | 0.00227648 | 24.3089  | 0.112001 | 37.04 |
| 587    | 2017 | -0.96 | 0.02 | 0.047712 | 0.00227648 | 23.10795 | 0.112001 | 37.04 |
| 2054   | 2017 | -0.59 | 0.02 | 0.005528 | 0.00003056 | 21.82549 | 0.018151 | 21.93 |
| 333    | 2017 | -0.44 | 0.02 | 0.005528 | 0.00003056 | 25.74206 | 0.224434 | 33.71 |
| 2076   | 2017 | -0.36 | 0.02 | 0.005528 | 0.00003056 | 21.16952 | 0.033504 | 33.11 |
| 2611   | 2017 | 0.518 | 0.02 | 0.005528 | 0.00003056 | 23.24401 | 0.067525 | 14.72 |
| 2670   | 2017 | -0.77 | 0.02 | 0.005528 | 0.00003056 | 24.05381 | 0.045096 | 16.94 |
| 2676   | 2017 | -0.55 | 0.02 | 0.005528 | 0.00003056 | 21.45087 | -0.04713 | 29    |
| 333    | 2017 | -0.25 | 0.02 | 0.005528 | 0.00003056 | 25.74206 | 0.224434 | 33.71 |
| 2676   | 2017 | -0.4  | 0.02 | 0.005528 | 0.00003056 | 21.45087 | -0.04713 | 29    |
| 967    | 2017 | -0.19 | 0.02 | 0.005528 | 0.00003056 | 23.90838 | 0.054681 | 32.14 |
| 2449   | 2017 | 0.121 | 0.02 | 0.005528 | 0.00003056 | 22.51026 | 0.109259 | 12.9  |
| 300464 | 2017 | -0.33 | 0.02 | 0.005528 | 0.00003056 | 20.7512  | 0.029667 | 50.83 |
| 2543   | 2017 | -0.37 | 0.02 | 0.005528 | 0.00003056 | 22.59661 | 0.132357 | 29.66 |
| 2076   | 2017 | 0.301 | 0.02 | 0.005528 | 0.00003056 | 21.16952 | 0.033504 | 33.11 |
| 300004 | 2017 | -0.11 | 0.02 | 0.005528 | 0.00003056 | 21.95794 | 0.007421 | 12.37 |
| 2611   | 2017 | 0.053 | 0.02 | 0.005528 | 0.00003056 | 23.24401 | 0.067525 | 14.72 |
| 603288 | 2017 | 0.424 | 0.02 | 0.005528 | 0.00003056 | 23.51664 | 0.300189 | 58.24 |
| 967    | 2017 | -0.19 | 0.02 | 0.005528 | 0.00003056 | 23.90838 | 0.054681 | 32.14 |
| 600499 | 2017 | -0.6  | 0.02 | 0.005528 | 0.00003056 | 23.22885 | 0.087401 | 11.03 |
| 973    | 2017 | 0.331 | 0.02 | 0.005528 | 0.00003056 | 22.44274 | 0.048424 | 26.01 |
| 2705   | 2017 | -0.67 | 0.02 | 0.005528 | 0.00003056 | 22.61829 | 0.10951  | 42.43 |
| 300004 | 2017 | -0.05 | 0.02 | 0.005528 | 0.00003056 | 22.07222 | 0.007421 | 12.37 |
| 300004 | 2017 | -0.15 | 0.02 | 0.005528 | 0.00003056 | 22.07222 | 0.007421 | 12.37 |
| 967    | 2017 | 0.601 | 0.02 | 0.005528 | 0.00003056 | 23.90838 | 0.054681 | 32.14 |
| 533    | 2017 | -0.71 | 0.02 | 0.005528 | 0.00003056 | 22.19708 | 0.030575 | 17.37 |
| 300464 | 2017 | -0.22 | 0.02 | 0.005528 | 0.00003056 | 20.7512  | 0.029667 | 50.83 |

|        |      |       |      |          |            |          |          |       |
|--------|------|-------|------|----------|------------|----------|----------|-------|
| 2705   | 2017 | -0.67 | 0.02 | 0.005528 | 0.00003056 | 22.61829 | 0.10951  | 42.43 |
| 2446   | 2017 | 0.75  | 0.02 | 0.005528 | 0.00003056 | 21.94686 | 0.036275 | 18    |
| 2054   | 2017 | 0.736 | 0.02 | 0.005528 | 0.00003056 | 21.82549 | 0.018151 | 21.93 |
| 300464 | 2017 | -0.27 | 0.02 | 0.005528 | 0.00003056 | 20.7512  | 0.029667 | 50.83 |
| 2295   | 2017 | -0.1  | 0.02 | 0.005528 | 0.00003056 | 21.28471 | 0.051674 | 15.41 |
| 333    | 2017 | -0.1  | 0.02 | 0.005528 | 0.00003056 | 25.74206 | 0.224434 | 33.71 |
| 333    | 2017 | 0.273 | 0.02 | 0.005528 | 0.00003056 | 25.74206 | 0.224434 | 33.71 |
| 2611   | 2017 | 0.05  | 0.02 | 0.005528 | 0.00003056 | 23.24401 | 0.067525 | 14.72 |
| 2666   | 2017 | -0.59 | 0.02 | 0.005528 | 0.00003056 | 21.98477 | 0.054695 | 37.54 |
| 2054   | 2017 | 0.736 | 0.02 | 0.005528 | 0.00003056 | 21.82549 | 0.018151 | 21.93 |
| 600499 | 2017 | -0.6  | 0.02 | 0.005528 | 0.00003056 | 22.88907 | 0.087401 | 11.03 |
| 603288 | 2017 | 0.566 | 0.02 | 0.005528 | 0.00003056 | 23.51664 | 0.300189 | 58.24 |
| 600499 | 2017 | -0.2  | 0.02 | 0.005528 | 0.00003056 | 23.22885 | 0.087401 | 11.03 |
| 2054   | 2017 | -0.59 | 0.02 | 0.005528 | 0.00003056 | 21.82549 | 0.018151 | 21.93 |
| 2295   | 2017 | -0.01 | 0.02 | 0.005528 | 0.00003056 | 21.28471 | 0.051674 | 15.41 |
| 967    | 2017 | 0.111 | 0.02 | 0.005528 | 0.00003056 | 23.90838 | 0.054681 | 32.14 |
| 333    | 2017 | 0.177 | 0.02 | 0.005528 | 0.00003056 | 25.74206 | 0.224434 | 33.71 |
| 967    | 2017 | 0.601 | 0.02 | 0.005528 | 0.00003056 | 23.90838 | 0.054681 | 32.14 |
| 2446   | 2017 | 0.919 | 0.02 | 0.005528 | 0.00003056 | 21.94686 | 0.036275 | 18    |
| 921    | 2017 | -0.05 | 0.02 | 0.005528 | 0.00003056 | 23.7963  | 0.292333 | 37.92 |
| 973    | 2017 | -0.22 | 0.02 | 0.005528 | 0.00003056 | 22.44274 | 0.048424 | 26.01 |
| 600499 | 2017 | 0.107 | 0.02 | 0.005528 | 0.00003056 | 23.22885 | 0.087401 | 11.03 |
| 300415 | 2017 | -0.25 | 0.02 | 0.005528 | 0.00003056 | 21.5848  | 0.256803 | 33.75 |
| 973    | 2017 | -0.43 | 0.02 | 0.005528 | 0.00003056 | 22.44274 | 0.048424 | 26.01 |
| 2543   | 2017 | -0.65 | 0.02 | 0.005528 | 0.00003056 | 22.59661 | 0.132357 | 29.66 |
| 300415 | 2017 | -0.13 | 0.02 | 0.005528 | 0.00003056 | 21.5848  | 0.256803 | 33.75 |
| 967    | 2017 | -0.14 | 0.02 | 0.005528 | 0.00003056 | 23.90838 | 0.054681 | 32.14 |
| 600499 | 2017 | -0.41 | 0.02 | 0.005528 | 0.00003056 | 23.22885 | 0.087401 | 11.03 |
| 2676   | 2017 | -0.43 | 0.02 | 0.005528 | 0.00003056 | 21.36569 | -0.04713 | 29    |
| 2054   | 2017 | -0.59 | 0.02 | 0.005528 | 0.00003056 | 21.82549 | 0.018151 | 21.93 |
| 921    | 2017 | 0.049 | 0.02 | 0.005528 | 0.00003056 | 23.7963  | 0.292333 | 37.92 |
| 921    | 2017 | -0.29 | 0.02 | 0.005528 | 0.00003056 | 23.7963  | 0.292333 | 37.92 |
| 2295   | 2017 | -0.01 | 0.02 | 0.005528 | 0.00003056 | 21.28471 | 0.051674 | 15.41 |
| 2611   | 2017 | 0.157 | 0.02 | 0.005528 | 0.00003056 | 23.24401 | 0.067525 | 14.72 |
| 2076   | 2017 | -0.11 | 0.02 | 0.005528 | 0.00003056 | 21.16952 | 0.033504 | 33.11 |
| 300173 | 2017 | -0.46 | 0.02 | 0.005528 | 0.00003056 | 21.68571 | 0.039893 | 21.21 |
| 921    | 2017 | 0.491 | 0.02 | 0.005528 | 0.00003056 | 23.7963  | 0.292333 | 37.92 |
| 300415 | 2017 | -0.22 | 0.02 | 0.005528 | 0.00003056 | 21.5848  | 0.256803 | 33.75 |
| 600323 | 2017 | -0.46 | 0.02 | 0.005528 | 0.00003056 | 23.37034 | 0.114355 | 17.98 |
| 2543   | 2017 | -0.46 | 0.02 | 0.005528 | 0.00003056 | 22.59661 | 0.132357 | 29.66 |
| 300173 | 2017 | -0.25 | 0.02 | 0.005528 | 0.00003056 | 21.68571 | 0.039893 | 21.21 |
| 2446   | 2017 | 0.359 | 0.02 | 0.005528 | 0.00003056 | 21.94686 | 0.036275 | 18    |
| 300417 | 2017 | 0.225 | 0.02 | 0.005528 | 0.00003056 | 20.10336 | 0.092091 | 15.32 |
| 600323 | 2017 | -0.18 | 0.02 | 0.005528 | 0.00003056 | 23.37034 | 0.114355 | 17.98 |
| 300004 | 2017 | 0.355 | 0.02 | 0.005528 | 0.00003056 | 22.07222 | 0.007421 | 12.37 |
| 2291   | 2017 | 0.461 | 0.02 | 0.005528 | 0.00003056 | 21.88128 | -0.22967 | 29.24 |
| 2295   | 2017 | 0.122 | 0.02 | 0.005528 | 0.00003056 | 21.28471 | 0.051674 | 15.41 |
| 600499 | 2017 | -0.24 | 0.02 | 0.005528 | 0.00003056 | 23.22885 | 0.087401 | 11.03 |
| 333    | 2017 | 0.177 | 0.02 | 0.005528 | 0.00003056 | 25.74206 | 0.224434 | 33.71 |
| 2711   | 2017 | 0.054 | 0.02 | 0.005528 | 0.00003056 | 21.62533 | 0.133501 | 52.41 |
| 300464 | 2017 | -0.33 | 0.02 | 0.005528 | 0.00003056 | 20.65008 | 0.029667 | 50.83 |
| 333    | 2017 | 0.212 | 0.02 | 0.005528 | 0.00003056 | 25.74206 | 0.224434 | 33.71 |
| 2543   | 2017 | -0.4  | 0.02 | 0.005528 | 0.00003056 | 22.59661 | 0.132357 | 29.66 |
| 2543   | 2017 | -0.55 | 0.02 | 0.005528 | 0.00003056 | 22.59661 | 0.132357 | 29.66 |

|        |      |       |      |          |            |          |          |       |
|--------|------|-------|------|----------|------------|----------|----------|-------|
| 2543   | 2017 | 0.672 | 0.02 | 0.005528 | 0.00003056 | 22.59661 | 0.132357 | 29.66 |
| 2543   | 2017 | -0.45 | 0.02 | 0.005528 | 0.00003056 | 22.59661 | 0.132357 | 29.66 |
| 333    | 2017 | -0.1  | 0.02 | 0.005528 | 0.00003056 | 25.74206 | 0.224434 | 33.71 |
| 2611   | 2017 | -0.28 | 0.02 | 0.005528 | 0.00003056 | 23.24401 | 0.067525 | 14.72 |
| 2446   | 2017 | 0.227 | 0.02 | 0.005528 | 0.00003056 | 21.94686 | 0.036275 | 18    |
| 333    | 2017 | -0.11 | 0.02 | 0.005528 | 0.00003056 | 25.74206 | 0.224434 | 33.71 |
| 2666   | 2017 | -0.38 | 0.02 | 0.005528 | 0.00003056 | 21.98477 | 0.054695 | 37.54 |
| 967    | 2017 | 0.601 | 0.02 | 0.005528 | 0.00003056 | 23.90838 | 0.054681 | 32.14 |
| 921    | 2017 | -0.39 | 0.02 | 0.005528 | 0.00003056 | 23.7963  | 0.292333 | 37.92 |
| 2611   | 2017 | -0.05 | 0.02 | 0.005528 | 0.00003056 | 22.77843 | 0.067525 | 14.72 |
| 333    | 2017 | -0    | 0.02 | 0.005528 | 0.00003056 | 25.74206 | 0.224434 | 33.71 |
| 2446   | 2017 | -0.06 | 0.02 | 0.005528 | 0.00003056 | 21.94686 | 0.036275 | 18    |
| 300415 | 2017 | -0.12 | 0.02 | 0.005528 | 0.00003056 | 21.5848  | 0.256803 | 33.75 |
| 333    | 2017 | 0.107 | 0.02 | 0.005528 | 0.00003056 | 25.74206 | 0.224434 | 33.71 |
| 300415 | 2017 | -0.1  | 0.02 | 0.005528 | 0.00003056 | 21.15716 | 0.256803 | 33.75 |
| 2676   | 2017 | -0.43 | 0.02 | 0.005528 | 0.00003056 | 21.45087 | -0.04713 | 29    |
| 2076   | 2017 | -0.03 | 0.02 | 0.005528 | 0.00003056 | 21.16952 | 0.033504 | 33.11 |
| 333    | 2017 | -0.1  | 0.02 | 0.005528 | 0.00003056 | 25.74206 | 0.224434 | 33.71 |
| 2449   | 2017 | 0.121 | 0.02 | 0.005528 | 0.00003056 | 22.55907 | 0.109259 | 12.9  |
| 2666   | 2017 | -0.33 | 0.02 | 0.005528 | 0.00003056 | 21.98477 | 0.054695 | 37.54 |
| 2676   | 2017 | -0.43 | 0.02 | 0.005528 | 0.00003056 | 21.45087 | -0.04713 | 29    |
| 2446   | 2017 | 0.919 | 0.02 | 0.005528 | 0.00003056 | 21.94686 | 0.036275 | 18    |
| 2670   | 2017 | -0.77 | 0.02 | 0.005528 | 0.00003056 | 23.53237 | 0.045096 | 16.94 |
| 2449   | 2017 | -0.1  | 0.02 | 0.005528 | 0.00003056 | 22.55907 | 0.109259 | 12.9  |
| 2676   | 2017 | -0.38 | 0.02 | 0.005528 | 0.00003056 | 21.45087 | -0.04713 | 29    |
| 333    | 2017 | 0.675 | 0.02 | 0.005528 | 0.00003056 | 25.74206 | 0.224434 | 33.71 |
| 2446   | 2017 | 0.75  | 0.02 | 0.005528 | 0.00003056 | 21.94686 | 0.036275 | 18    |
| 300173 | 2017 | -0.25 | 0.02 | 0.005528 | 0.00003056 | 21.68571 | 0.039893 | 21.21 |
| 333    | 2017 | -0.09 | 0.02 | 0.005528 | 0.00003056 | 25.74206 | 0.224434 | 33.71 |
| 603288 | 2017 | 0.566 | 0.02 | 0.005528 | 0.00003056 | 23.51664 | 0.300189 | 58.24 |
| 300004 | 2017 | -0.59 | 0.02 | 0.005528 | 0.00003056 | 22.07222 | 0.007421 | 12.37 |
| 973    | 2017 | -0.22 | 0.02 | 0.005528 | 0.00003056 | 22.44274 | 0.048424 | 26.01 |
| 300004 | 2017 | 0.586 | 0.02 | 0.005528 | 3.06E-05   | 22.07222 | 0.007421 | 12.37 |
| 541    | 2017 | -0.43 | 0.02 | 0.005528 | 3.06E-05   | 22.45948 | 0.155391 | 13.47 |
| 333    | 2017 | 0.086 | 0.02 | 0.005528 | 3.06E-05   | 25.74206 | 0.224434 | 33.71 |
| 2676   | 2017 | -0.55 | 0.02 | 0.005528 | 3.06E-05   | 21.45087 | -0.04713 | 29    |
| 2705   | 2017 | -0.45 | 0.02 | 0.005528 | 3.06E-05   | 22.61829 | 0.10951  | 42.43 |
| 600499 | 2017 | -0.12 | 0.02 | 0.005528 | 3.06E-05   | 23.22885 | 0.087401 | 11.03 |
| 973    | 2017 | 0.331 | 0.02 | 0.005528 | 3.06E-05   | 22.44274 | 0.048424 | 26.01 |
| 333    | 2017 | -0.23 | 0.02 | 0.005528 | 0.00003056 | 25.74206 | 0.224434 | 33.71 |
| 333    | 2017 | -0.46 | 0.02 | 0.005528 | 0.00003056 | 25.74206 | 0.224434 | 33.71 |
| 2666   | 2017 | -0.35 | 0.02 | 0.005528 | 0.00003056 | 21.98477 | 0.054695 | 37.54 |
| 2291   | 2017 | 0.461 | 0.02 | 0.005528 | 0.00003056 | 21.88128 | -0.22967 | 29.24 |
| 2543   | 2017 | -0.44 | 0.02 | 0.005528 | 0.00003056 | 22.59661 | 0.132357 | 29.66 |
| 921    | 2017 | -0.13 | 0.02 | 0.005528 | 0.00003056 | 23.7963  | 0.292333 | 37.92 |
| 600499 | 2017 | -0.24 | 0.02 | 0.005528 | 0.00003056 | 23.22885 | 0.087401 | 11.03 |
| 2291   | 2017 | 0.461 | 0.02 | 0.005528 | 0.00003056 | 21.88128 | -0.22967 | 29.24 |
| 541    | 2017 | -0.45 | 0.02 | 0.005528 | 0.00003056 | 22.45948 | 0.155391 | 13.47 |
| 2666   | 2017 | 0.732 | 0.02 | 0.005528 | 0.00003056 | 21.98477 | 0.054695 | 37.54 |
| 300464 | 2017 | 0.073 | 0.02 | 0.005528 | 0.00003056 | 20.7512  | 0.029667 | 50.83 |
| 333    | 2017 | 0.177 | 0.02 | 0.005528 | 0.00003056 | 25.74206 | 0.224434 | 33.71 |
| 2711   | 2017 | 0.054 | 0.02 | 0.005528 | 0.00003056 | 22.00673 | 0.133501 | 52.41 |
| 300173 | 2017 | 0.71  | 0.02 | 0.005528 | 0.00003056 | 21.68571 | 0.039893 | 21.21 |
| 333    | 2017 | -0.1  | 0.02 | 0.005528 | 0.00003056 | 25.74206 | 0.224434 | 33.71 |

|        |      |       |      |          |            |          |          |       |
|--------|------|-------|------|----------|------------|----------|----------|-------|
| 2670   | 2017 | -0.77 | 0.02 | 0.005528 | 0.00003056 | 24.05381 | 0.045096 | 16.94 |
| 333    | 2017 | 0.177 | 0.02 | 0.005528 | 0.00003056 | 25.74206 | 0.224434 | 33.71 |
| 2666   | 2017 | -0.59 | 0.02 | 0.005528 | 0.00003056 | 21.98477 | 0.054695 | 37.54 |
| 967    | 2017 | -0.72 | 0.02 | 0.005528 | 0.00003056 | 23.90838 | 0.054681 | 32.14 |
| 2666   | 2017 | -0.59 | 0.02 | 0.005528 | 0.00003056 | 21.98477 | 0.054695 | 37.54 |
| 300173 | 2017 | -0.25 | 0.02 | 0.005528 | 0.00003056 | 21.68571 | 0.039893 | 21.21 |
| 2711   | 2017 | 0.054 | 0.02 | 0.005528 | 0.00003056 | 22.00673 | 0.133501 | 52.41 |
| 600323 | 2017 | -0.84 | 0.02 | 0.005528 | 0.00003056 | 23.37034 | 0.114355 | 17.98 |
| 300417 | 2017 | 0.225 | 0.02 | 0.005528 | 0.00003056 | 20.10336 | 0.092091 | 15.32 |
| 921    | 2017 | -0.64 | 0.02 | 0.005528 | 0.00003056 | 23.7963  | 0.292333 | 37.92 |
| 921    | 2017 | -0.5  | 0.02 | 0.005528 | 0.00003056 | 23.7963  | 0.292333 | 37.92 |
| 921    | 2017 | -0.57 | 0.02 | 0.005528 | 0.00003056 | 22.71225 | 0.292333 | 37.92 |
| 300417 | 2017 | 0.225 | 0.02 | 0.005528 | 3.06E-05   | 20.10336 | 0.092091 | 15.32 |
| 921    | 2017 | 0.053 | 0.02 | 0.005528 | 3.06E-05   | 23.7963  | 0.292333 | 37.92 |
| 2449   | 2017 | -0.18 | 0.02 | 0.005528 | 3.06E-05   | 22.55907 | 0.109259 | 12.9  |
| 600499 | 2017 | -0.22 | 0.02 | 0.005528 | 3.06E-05   | 23.22885 | 0.087401 | 11.03 |
| 2705   | 2017 | -0.29 | 0.02 | 0.005528 | 3.06E-05   | 22.52794 | 0.10951  | 42.43 |
| 2676   | 2017 | 0.292 | 0.02 | 0.005528 | 3.06E-05   | 21.45087 | -0.04713 | 29    |
| 967    | 2017 | -0.67 | 0.02 | 0.005528 | 3.06E-05   | 22.39352 | 0.054681 | 32.14 |
| 973    | 2017 | -0.31 | 0.02 | 0.005528 | 3.06E-05   | 22.44274 | 0.048424 | 26.01 |
| 921    | 2017 | -0.17 | 0.02 | 0.005528 | 3.06E-05   | 23.7963  | 0.292333 | 37.92 |
| 973    | 2017 | 0.662 | 0.02 | 0.005528 | 0.00003056 | 22.44274 | 0.048424 | 26.01 |
| 973    | 2017 | -0.22 | 0.02 | 0.005528 | 0.00003056 | 22.44274 | 0.048424 | 26.01 |
| 2446   | 2017 | -0.06 | 0.02 | 0.005528 | 0.00003056 | 21.94686 | 0.036275 | 18    |
| 2054   | 2017 | -0.59 | 0.02 | 0.005528 | 0.00003056 | 21.82549 | 0.018151 | 21.93 |
| 973    | 2017 | -0.22 | 0.02 | 0.005528 | 0.00003056 | 22.44274 | 0.048424 | 26.01 |
| 921    | 2017 | 0.039 | 0.02 | 0.005528 | 0.00003056 | 23.7963  | 0.292333 | 37.92 |
| 333    | 2017 | 0.343 | 0.02 | 0.005528 | 0.00003056 | 25.74206 | 0.224434 | 33.71 |
| 2446   | 2017 | 0.863 | 0.02 | 0.005528 | 0.00003056 | 21.94686 | 0.036275 | 18    |
| 533    | 2017 | -0.24 | 0.02 | 0.005528 | 0.00003056 | 22.19708 | 0.030575 | 17.37 |
| 2676   | 2017 | 0.336 | 0.02 | 0.005528 | 0.00003056 | 21.45087 | -0.04713 | 29    |
| 600499 | 2017 | 0.46  | 0.02 | 0.005528 | 0.00003056 | 23.22885 | 0.087401 | 11.03 |
| 600499 | 2017 | -0.6  | 0.02 | 0.005528 | 0.00003056 | 23.22885 | 0.087401 | 11.03 |
| 2054   | 2017 | -0.59 | 0.02 | 0.005528 | 0.00003056 | 21.82549 | 0.018151 | 21.93 |
| 600499 | 2017 | -0.2  | 0.02 | 0.005528 | 0.00003056 | 23.22885 | 0.087401 | 11.03 |
| 300464 | 2017 | -0.08 | 0.02 | 0.005528 | 0.00003056 | 20.7512  | 0.029667 | 50.83 |
| 300173 | 2017 | -0.25 | 0.02 | 0.005528 | 0.00003056 | 21.44106 | 0.039893 | 21.21 |
| 603288 | 2017 | 0.566 | 0.02 | 0.005528 | 0.00003056 | 23.25426 | 0.300189 | 58.24 |
| 2543   | 2017 | -0.44 | 0.02 | 0.005528 | 0.00003056 | 22.17564 | 0.132357 | 29.66 |
| 600499 | 2017 | -0.35 | 0.02 | 0.005528 | 0.00003056 | 23.22885 | 0.087401 | 11.03 |
| 333    | 2017 | -0.1  | 0.02 | 0.005528 | 0.00003056 | 25.74206 | 0.224434 | 33.71 |
| 333    | 2017 | 0.132 | 0.02 | 0.005528 | 0.00003056 | 25.74206 | 0.224434 | 33.71 |
| 2611   | 2017 | -0.05 | 0.02 | 0.005528 | 0.00003056 | 23.24401 | 0.067525 | 14.72 |
| 2611   | 2017 | -0.04 | 0.02 | 0.005528 | 0.00003056 | 23.24401 | 0.067525 | 14.72 |
| 300464 | 2017 | -0.27 | 0.02 | 0.005528 | 0.00003056 | 20.7512  | 0.029667 | 50.83 |
| 2295   | 2017 | 0.122 | 0.02 | 0.005528 | 0.00003056 | 20.84165 | 0.051674 | 15.41 |
| 600323 | 2017 | -0.51 | 0.02 | 0.005528 | 0.00003056 | 23.37034 | 0.114355 | 17.98 |
| 2449   | 2017 | -0.18 | 0.02 | 0.005528 | 0.00003056 | 22.55907 | 0.109259 | 12.9  |
| 2705   | 2017 | -0.67 | 0.02 | 0.005528 | 0.00003056 | 22.61829 | 0.10951  | 42.43 |
| 2076   | 2017 | -0.36 | 0.02 | 0.005528 | 0.00003056 | 21.51704 | 0.033504 | 33.11 |
| 541    | 2017 | -0.43 | 0.02 | 0.005528 | 0.00003056 | 22.46426 | 0.155391 | 13.47 |
| 300415 | 2017 | -0.1  | 0.02 | 0.005528 | 0.00003056 | 21.5848  | 0.256803 | 33.75 |
| 333    | 2017 | -0.1  | 0.02 | 0.005528 | 0.00003056 | 25.74206 | 0.224434 | 33.71 |
| 300415 | 2017 | -0.12 | 0.02 | 0.005528 | 0.00003056 | 21.5848  | 0.256803 | 33.75 |

|        |      |       |      |          |            |          |          |       |
|--------|------|-------|------|----------|------------|----------|----------|-------|
| 300464 | 2017 | -0.49 | 0.02 | 0.005528 | 0.00003056 | 20.7512  | 0.029667 | 50.83 |
| 2705   | 2017 | -0.67 | 0.02 | 0.005528 | 0.00003056 | 22.61829 | 0.10951  | 42.43 |
| 2054   | 2017 | 0.736 | 0.02 | 0.005528 | 0.00003056 | 21.82549 | 0.018151 | 21.93 |
| 2054   | 2017 | -0.59 | 0.02 | 0.005528 | 0.00003056 | 21.82549 | 0.018151 | 21.93 |
| 2054   | 2017 | -0.59 | 0.02 | 0.005528 | 0.00003056 | 21.82549 | 0.018151 | 21.93 |
| 2054   | 2017 | -0.26 | 0.02 | 0.005528 | 0.00003056 | 21.82549 | 0.018151 | 21.93 |
| 603288 | 2017 | 0.566 | 0.02 | 0.005528 | 0.00003056 | 23.51664 | 0.300189 | 58.24 |
| 2054   | 2017 | 0.736 | 0.02 | 0.005528 | 0.00003056 | 21.82549 | 0.018151 | 21.93 |
| 2054   | 2017 | -0.59 | 0.02 | 0.005528 | 0.00003056 | 21.82549 | 0.018151 | 21.93 |
| 600323 | 2017 | -0.48 | 0.02 | 0.005528 | 0.00003056 | 23.37034 | 0.114355 | 17.98 |
| 2670   | 2017 | -0.77 | 0.02 | 0.005528 | 0.00003056 | 24.05381 | 0.045096 | 16.94 |
| 2670   | 2017 | -0.77 | 0.02 | 0.005528 | 0.00003056 | 24.05381 | 0.045096 | 16.94 |
| 973    | 2017 | -0.22 | 0.02 | 0.005528 | 0.00003056 | 22.44274 | 0.048424 | 26.01 |
| 2076   | 2017 | 0.08  | 0.02 | 0.005528 | 0.00003056 | 21.16952 | 0.033504 | 33.11 |
| 300417 | 2017 | 0.225 | 0.02 | 0.005528 | 0.00003056 | 20.10336 | 0.092091 | 15.32 |
| 2705   | 2017 | -0.48 | 0.02 | 0.005528 | 0.00003056 | 22.61829 | 0.10951  | 42.43 |
| 333    | 2017 | -0.05 | 0.02 | 0.005528 | 0.00003056 | 25.74206 | 0.224434 | 33.71 |
| 603288 | 2017 | 0.566 | 0.02 | 0.005528 | 0.00003056 | 23.51664 | 0.300189 | 58.24 |
| 533    | 2017 | 0.135 | 0.02 | 0.005528 | 0.00003056 | 22.19708 | 0.030575 | 17.37 |
| 533    | 2017 | -0.21 | 0.02 | 0.005528 | 0.00003056 | 22.19708 | 0.030575 | 17.37 |
| 300415 | 2017 | 0.116 | 0.02 | 0.005528 | 0.00003056 | 21.5848  | 0.256803 | 33.75 |
| 2705   | 2017 | 0.208 | 0.02 | 0.005528 | 0.00003056 | 22.61829 | 0.10951  | 42.43 |
| 300173 | 2017 | -0.29 | 0.02 | 0.005528 | 0.00003056 | 21.68571 | 0.039893 | 21.21 |
| 600323 | 2017 | -0.84 | 0.02 | 0.005528 | 0.00003056 | 23.37034 | 0.114355 | 17.98 |
| 333    | 2017 | 0.113 | 0.02 | 0.005528 | 0.00003056 | 25.25562 | 0.224434 | 33.71 |
| 2054   | 2017 | -0.59 | 0.02 | 0.005528 | 0.00003056 | 21.82549 | 0.018151 | 21.93 |
| 600499 | 2017 | -0.18 | 0.02 | 0.005528 | 0.00003056 | 23.22885 | 0.087401 | 11.03 |
| 300173 | 2017 | -0.28 | 0.02 | 0.005528 | 0.00003056 | 21.68571 | 0.039893 | 21.21 |
| 2054   | 2017 | 0.736 | 0.02 | 0.005528 | 0.00003056 | 21.82549 | 0.018151 | 21.93 |
| 2076   | 2017 | -0.27 | 0.02 | 0.005528 | 0.00003056 | 21.16952 | 0.033504 | 33.11 |
| 300173 | 2017 | -0.25 | 0.02 | 0.005528 | 0.00003056 | 21.68571 | 0.039893 | 21.21 |
| 333    | 2017 | -0.15 | 0.02 | 0.005528 | 0.00003056 | 25.74206 | 0.224434 | 33.71 |
| 600499 | 2017 | -0.31 | 0.02 | 0.005528 | 0.00003056 | 23.22885 | 0.087401 | 11.03 |
| 2666   | 2017 | 0.732 | 0.02 | 0.005528 | 0.00003056 | 21.98477 | 0.054695 | 37.54 |
| 600323 | 2017 | -0.18 | 0.02 | 0.005528 | 0.00003056 | 22.87071 | 0.114355 | 17.98 |
| 541    | 2017 | -0.78 | 0.02 | 0.005528 | 0.00003056 | 22.45948 | 0.155391 | 13.47 |
| 333    | 2017 | 0.125 | 0.02 | 0.005528 | 0.00003056 | 25.74206 | 0.224434 | 33.71 |
| 921    | 2017 | -0.13 | 0.02 | 0.005528 | 0.00003056 | 23.7963  | 0.292333 | 37.92 |
| 921    | 2017 | 0.053 | 0.02 | 0.005528 | 0.00003056 | 23.7963  | 0.292333 | 37.92 |
| 921    | 2017 | -0.2  | 0.02 | 0.005528 | 0.00003056 | 23.7963  | 0.292333 | 37.92 |
| 333    | 2017 | 0.369 | 0.02 | 0.005528 | 0.00003056 | 25.74206 | 0.224434 | 33.71 |
| 333    | 2017 | -0.39 | 0.02 | 0.005528 | 0.00003056 | 25.74206 | 0.224434 | 33.71 |
| 333    | 2017 | -0.24 | 0.02 | 0.005528 | 0.00003056 | 25.74206 | 0.224434 | 33.71 |
| 333    | 2017 | -0.1  | 0.02 | 0.005528 | 0.00003056 | 25.74206 | 0.224434 | 33.71 |
| 533    | 2017 | -0.21 | 0.02 | 0.005528 | 0.00003056 | 21.20452 | 0.030575 | 17.37 |
| 2705   | 2017 | -0.67 | 0.02 | 0.005528 | 0.00003056 | 22.61829 | 0.10951  | 42.43 |
| 2705   | 2017 | -0.63 | 0.02 | 0.005528 | 0.00003056 | 22.61829 | 0.10951  | 42.43 |
| 973    | 2017 | -0.66 | 0.02 | 0.005528 | 0.00003056 | 22.44274 | 0.048424 | 26.01 |
| 2291   | 2017 | 0.461 | 0.02 | 0.005528 | 0.00003056 | 21.88128 | -0.22967 | 29.24 |
| 2611   | 2017 | 0.13  | 0.02 | 0.005528 | 0.00003056 | 23.24401 | 0.067525 | 14.72 |
| 2054   | 2017 | 0.736 | 0.02 | 0.005528 | 0.00003056 | 21.82549 | 0.018151 | 21.93 |
| 300004 | 2017 | -0.06 | 0.02 | 0.005528 | 0.00003056 | 22.07222 | 0.007421 | 12.37 |
| 2666   | 2017 | -0.59 | 0.02 | 0.005528 | 0.00003056 | 21.98477 | 0.054695 | 37.54 |
| 300417 | 2017 | 0.225 | 0.02 | 0.005528 | 0.00003056 | 20.10336 | 0.092091 | 15.32 |

|        |      |       |      |          |            |          |          |       |
|--------|------|-------|------|----------|------------|----------|----------|-------|
| 2666   | 2017 | -0.22 | 0.02 | 0.005528 | 0.00003056 | 21.62824 | 0.054695 | 37.54 |
| 2711   | 2017 | 0.054 | 0.02 | 0.005528 | 0.00003056 | 22.00673 | 0.133501 | 52.41 |
| 300173 | 2017 | 0.71  | 0.02 | 0.005528 | 0.00003056 | 21.68571 | 0.039893 | 21.21 |
| 333    | 2017 | -0.39 | 0.02 | 0.005528 | 0.00003056 | 25.74206 | 0.224434 | 33.71 |
| 967    | 2017 | -0.15 | 0.02 | 0.005528 | 0.00003056 | 23.90838 | 0.054681 | 32.14 |
| 973    | 2017 | -0.66 | 0.02 | 0.005528 | 0.00003056 | 22.01787 | 0.048424 | 26.01 |
| 333    | 2017 | 0.177 | 0.02 | 0.005528 | 0.00003056 | 25.74206 | 0.224434 | 33.71 |
| 333    | 2017 | 0.022 | 0.02 | 0.005528 | 0.00003056 | 25.74206 | 0.224434 | 33.71 |
| 2291   | 2017 | 0.461 | 0.02 | 0.005528 | 0.00003056 | 21.82191 | -0.22967 | 29.24 |
| 300173 | 2017 | 0.108 | 0.02 | 0.005528 | 0.00003056 | 21.68571 | 0.039893 | 21.21 |
| 2611   | 2017 | -0.04 | 0.02 | 0.005528 | 0.00003056 | 23.24401 | 0.067525 | 14.72 |
| 333    | 2017 | 9E-04 | 0.02 | 0.005528 | 0.00003056 | 25.74206 | 0.224434 | 33.71 |
| 2076   | 2017 | -0.36 | 0.02 | 0.005528 | 0.00003056 | 21.16952 | 0.033504 | 33.11 |
| 333    | 2017 | -0.1  | 0.02 | 0.005528 | 0.00003056 | 25.74206 | 0.224434 | 33.71 |
| 2676   | 2017 | -0.41 | 0.02 | 0.005528 | 0.00003056 | 21.45087 | -0.04713 | 29    |
| 600323 | 2017 | -0.49 | 0.02 | 0.005528 | 0.00003056 | 23.37034 | 0.114355 | 17.98 |
| 533    | 2017 | -0.71 | 0.02 | 0.005528 | 0.00003056 | 22.19708 | 0.030575 | 17.37 |
| 300004 | 2017 | -0.28 | 0.02 | 0.005528 | 0.00003056 | 22.07222 | 0.007421 | 12.37 |
| 2446   | 2017 | 0.382 | 0.02 | 0.005528 | 0.00003056 | 21.74416 | 0.036275 | 18    |
| 2076   | 2017 | -0.03 | 0.02 | 0.005528 | 0.00003056 | 21.16952 | 0.033504 | 33.11 |
| 333    | 2017 | -0.52 | 0.02 | 0.005528 | 0.00003056 | 25.74206 | 0.224434 | 33.71 |
| 541    | 2017 | -0.45 | 0.02 | 0.005528 | 0.00003056 | 22.45948 | 0.155391 | 13.47 |
| 333    | 2017 | -0.1  | 0.02 | 0.005528 | 0.00003056 | 25.74206 | 0.224434 | 33.71 |
| 333    | 2017 | -0.12 | 0.02 | 0.005528 | 0.00003056 | 25.74206 | 0.224434 | 33.71 |
| 300415 | 2017 | 0.116 | 0.02 | 0.005528 | 0.00003056 | 21.5848  | 0.256803 | 33.75 |
| 333    | 2017 | -0.15 | 0.02 | 0.005528 | 0.00003056 | 25.74206 | 0.224434 | 33.71 |
| 333    | 2017 | 0.177 | 0.02 | 0.005528 | 0.00003056 | 25.74206 | 0.224434 | 33.71 |
| 921    | 2017 | -0.39 | 0.02 | 0.005528 | 0.00003056 | 23.7963  | 0.292333 | 37.92 |
| 921    | 2017 | -0.83 | 0.02 | 0.005528 | 0.00003056 | 23.7963  | 0.292333 | 37.92 |
| 300004 | 2017 | -0.11 | 0.02 | 0.005528 | 0.00003056 | 22.07222 | 0.007421 | 12.37 |
| 2705   | 2017 | -0.63 | 0.02 | 0.005528 | 0.00003056 | 22.61829 | 0.10951  | 42.43 |
| 921    | 2017 | -0.39 | 0.02 | 0.005528 | 0.00003056 | 23.7963  | 0.292333 | 37.92 |
| 2543   | 2017 | 0.459 | 0.02 | 0.005528 | 0.00003056 | 22.59661 | 0.132357 | 29.66 |
| 967    | 2017 | -0.67 | 0.02 | 0.005528 | 0.00003056 | 23.90838 | 0.054681 | 32.14 |
| 541    | 2017 | -0.45 | 0.02 | 0.005528 | 0.00003056 | 22.45948 | 0.155391 | 13.47 |
| 2676   | 2017 | -0.77 | 0.02 | 0.005528 | 0.00003056 | 21.45087 | -0.04713 | 29    |
| 973    | 2017 | -0.22 | 0.02 | 0.005528 | 0.00003056 | 22.44274 | 0.048424 | 26.01 |
| 973    | 2017 | -0.44 | 0.02 | 0.005528 | 0.00003056 | 22.44274 | 0.048424 | 26.01 |
| 603288 | 2017 | 0.424 | 0.02 | 0.005528 | 0.00003056 | 23.51664 | 0.300189 | 58.24 |
| 541    | 2017 | -0.78 | 0.02 | 0.005528 | 0.00003056 | 22.45948 | 0.155391 | 13.47 |
| 2054   | 2017 | -0.59 | 0.02 | 0.005528 | 0.00003056 | 21.82549 | 0.018151 | 21.93 |
| 2054   | 2017 | -0.12 | 0.02 | 0.005528 | 0.00003056 | 21.68618 | 0.018151 | 21.93 |
| 333    | 2017 | 0.021 | 0.02 | 0.005528 | 0.00003056 | 25.74206 | 0.224434 | 33.71 |
| 2076   | 2017 | -0.11 | 0.02 | 0.005528 | 0.00003056 | 21.16952 | 0.033504 | 33.11 |
| 921    | 2017 | -0.25 | 0.02 | 0.005528 | 0.00003056 | 23.7963  | 0.292333 | 37.92 |
| 333    | 2017 | -0.49 | 0.02 | 0.005528 | 0.00003056 | 25.74206 | 0.224434 | 33.71 |
| 533    | 2017 | -0.21 | 0.02 | 0.005528 | 0.00003056 | 22.19708 | 0.030575 | 17.37 |
| 333    | 2017 | 0.343 | 0.02 | 0.005528 | 0.00003056 | 25.74206 | 0.224434 | 33.71 |
| 333    | 2017 | -0.2  | 0.02 | 0.005528 | 0.00003056 | 25.74206 | 0.224434 | 33.71 |
| 300173 | 2017 | -0.25 | 0.02 | 0.005528 | 0.00003056 | 21.68571 | 0.039893 | 21.21 |
| 2543   | 2017 | -0.53 | 0.02 | 0.005528 | 0.00003056 | 22.59661 | 0.132357 | 29.66 |
| 333    | 2017 | -0.27 | 0.02 | 0.005528 | 0.00003056 | 25.74206 | 0.224434 | 33.71 |
| 333    | 2017 | 0.012 | 0.02 | 0.005528 | 0.00003056 | 25.74206 | 0.224434 | 33.71 |
| 2676   | 2017 | -0.77 | 0.02 | 0.005528 | 0.00003056 | 21.45087 | -0.04713 | 29    |



|        |      |       |      |          |            |          |          |       |
|--------|------|-------|------|----------|------------|----------|----------|-------|
| 333    | 2017 | 0.085 | 0.02 | 0.005528 | 0.00003056 | 25.74206 | 0.224434 | 33.71 |
| 2705   | 2017 | 0.65  | 0.02 | 0.005528 | 0.00003056 | 22.61829 | 0.10951  | 42.43 |
| 603288 | 2017 | 0.513 | 0.02 | 0.005528 | 0.00003056 | 23.51664 | 0.300189 | 58.24 |
| 922    | 2017 | -0.6  | 0.02 | 0.977131 | 0.95478509 | 21.64483 | 0.077539 | 23.75 |
| 922    | 2017 | -0.6  | 0.02 | 0.977131 | 0.95478509 | 21.73429 | 0.077539 | 23.75 |
| 922    | 2017 | -0.6  | 0.02 | 0.977131 | 0.95478509 | 21.73429 | 0.077539 | 23.75 |
| 922    | 2017 | -0.6  | 0.02 | 0.977131 | 0.95478509 | 21.73429 | 0.077539 | 23.75 |
| 603198 | 2017 | -0.46 | 0.04 | 1.100463 | 1.2110179  | 22.50203 | 0.16167  | 74.18 |
| 600496 | 2017 | -0.05 | 0.04 | 1.100463 | 1.2110179  | 23.17027 | 0.015667 | 24.17 |
| 600496 | 2017 | -0.32 | 0.04 | 1.100463 | 1.2110179  | 23.17027 | 0.015667 | 24.17 |
| 600496 | 2017 | -0.21 | 0.04 | 1.100463 | 1.2110179  | 23.17027 | 0.015667 | 24.17 |
| 600496 | 2017 | -0.07 | 0.04 | 1.100463 | 1.2110179  | 23.17027 | 0.015667 | 24.17 |
| 600496 | 2017 | -0.62 | 0.04 | 1.100463 | 1.2110179  | 23.17027 | 0.015667 | 24.17 |
| 600496 | 2017 | 0.388 | 0.04 | 1.100463 | 1.2110179  | 23.17027 | 0.015667 | 24.17 |
| 600496 | 2017 | 0.704 | 0.04 | 1.100463 | 1.2110179  | 23.17027 | 0.015667 | 24.17 |
| 600496 | 2017 | 0.013 | 0.04 | 1.100463 | 1.2110179  | 23.17027 | 0.015667 | 24.17 |
| 600496 | 2017 | -0.05 | 0.04 | 1.100463 | 1.2110179  | 23.17027 | 0.015667 | 24.17 |
| 600496 | 2017 | -0.24 | 0.04 | 1.100463 | 1.2110179  | 23.17027 | 0.015667 | 24.17 |
| 603198 | 2017 | 0.386 | 0.04 | 1.100463 | 1.2110179  | 22.49656 | 0.16167  | 74.18 |
| 600496 | 2017 | -0.21 | 0.04 | 1.100463 | 1.2110179  | 23.17027 | 0.015667 | 24.17 |
| 600496 | 2017 | -0    | 0.04 | 1.100463 | 1.2110179  | 22.52136 | 0.015667 | 24.17 |
| 600496 | 2017 | -0.07 | 0.04 | 1.100463 | 1.2110179  | 23.17027 | 0.015667 | 24.17 |
| 603198 | 2017 | -0.54 | 0.04 | 1.100463 | 1.2110179  | 22.49656 | 0.16167  | 74.18 |
| 600496 | 2017 | -0.62 | 0.04 | 1.100463 | 1.2110179  | 23.17027 | 0.015667 | 24.17 |
| 600496 | 2017 | -0.05 | 0.04 | 1.100463 | 1.2110179  | 23.17027 | 0.015667 | 24.17 |
| 603198 | 2017 | -0.54 | 0.04 | 1.100463 | 1.21E+00   | 22.49656 | 0.16167  | 74.18 |
| 603198 | 2017 | -0.54 | 0.04 | 1.100463 | 1.21E+00   | 22.49656 | 0.16167  | 74.18 |
| 600496 | 2017 | -0.04 | 0.04 | 1.100463 | 1.21E+00   | 23.17027 | 0.015667 | 24.17 |
| 600496 | 2017 | -0.07 | 0.04 | 1.100463 | 1.21E+00   | 23.17027 | 0.015667 | 24.17 |
| 603198 | 2017 | 0.386 | 0.04 | 1.100463 | 1.21E+00   | 22.49656 | 0.16167  | 74.18 |
| 603198 | 2017 | -0.54 | 0.04 | 1.100463 | 1.21E+00   | 22.49656 | 0.16167  | 74.18 |
| 600395 | 2017 | -0.2  | 0.01 | 0.005528 | 3.06E-05   | 23.22689 | 0.128356 | 58.07 |
| 600395 | 2017 | -0.2  | 0.01 | 0.005528 | 3.06E-05   | 23.16349 | 0.128356 | 58.07 |
| 600395 | 2017 | -0.2  | 0.01 | 0.005528 | 3.06E-05   | 23.22689 | 0.128356 | 58.07 |
| 600395 | 2017 | -0.2  | 0.01 | 0.005528 | 0.00003056 | 23.22689 | 0.128356 | 58.07 |
| 600395 | 2017 | -0.2  | 0.01 | 0.005528 | 0.00003056 | 23.22689 | 0.128356 | 58.07 |
| 600395 | 2017 | -0.2  | 0.01 | 0.005528 | 0.00003056 | 23.22689 | 0.128356 | 58.07 |
| 757    | 2017 | -0.09 | 0.01 | 1.80226  | 3.2481422  | 20.10336 | 0.075964 | 30.74 |
| 757    | 2017 | -0.09 | 0.01 | 1.80226  | 3.2481422  | 20.83248 | 0.075964 | 30.74 |
| 757    | 2017 | -0.09 | 0.01 | 1.80226  | 3.2481422  | 20.83248 | 0.075964 | 30.74 |
| 300239 | 2017 | 0.264 | 0    | 1.95559  | 3.8243317  | 20.69439 | 0.030718 | 32.36 |
| 600111 | 2017 | 0.119 | 0    | 1.95559  | 3.8243317  | 23.7486  | 0.065428 | 30    |
| 600111 | 2017 | 0.462 | 0    | 1.95559  | 3.8243317  | 23.7486  | 0.065428 | 30    |
| 600262 | 2017 | -0.04 | 0    | 1.95559  | 3.8243317  | 21.46185 | 0.039486 | 32.26 |
| 300239 | 2017 | 0.264 | 0    | 1.95559  | 3.8243317  | 20.70897 | 0.030718 | 32.36 |
| 600262 | 2017 | -0.04 | 0    | 1.95559  | 3.8243317  | 21.4356  | 0.039486 | 32.26 |
| 600262 | 2017 | -0.04 | 0    | 1.95559  | 3.8243317  | 21.4356  | 0.039486 | 32.26 |
| 600010 | 2017 | 0.026 | 0    | 1.95559  | 3.8243317  | 25.71126 | 0.041401 | 54.66 |
| 600111 | 2017 | 0.462 | 0    | 1.95559  | 3.8243317  | 23.7486  | 0.065428 | 30    |
| 600967 | 2017 | -0.54 | 0    | 1.95559  | 3.8243317  | 23.6233  | 0.066902 | 51.68 |
| 600111 | 2017 | -0.86 | 0    | 1.95559  | 3.8243317  | 23.7486  | 0.065428 | 30    |
| 600111 | 2017 | 0.462 | 0    | 1.95559  | 3.8243317  | 23.7486  | 0.065428 | 30    |
| 600111 | 2017 | 0.02  | 0    | 1.95559  | 3.8243317  | 23.7486  | 0.065428 | 30    |
| 600967 | 2017 | -0.5  | 0    | 1.95559  | 3.8243317  | 23.54925 | 0.066902 | 51.68 |

|        |      |       |      |          |           |          |          |       |
|--------|------|-------|------|----------|-----------|----------|----------|-------|
| 600111 | 2017 | -0.71 | 0    | 1.95559  | 3.8243317 | 23.7486  | 0.065428 | 30    |
| 600111 | 2017 | 0.462 | 0    | 1.95559  | 3.8243317 | 23.7486  | 0.065428 | 30    |
| 600111 | 2017 | -0.13 | 0    | 1.95559  | 3.8243317 | 23.7486  | 0.065428 | 30    |
| 600967 | 2017 | -0.5  | 0    | 1.95559  | 3.8243317 | 23.6233  | 0.066902 | 51.68 |
| 600111 | 2017 | -0.86 | 0    | 1.95559  | 3.8243317 | 23.7486  | 0.065428 | 30    |
| 600010 | 2017 | 0.026 | 0    | 1.95559  | 3.8243317 | 25.70531 | 0.041401 | 54.66 |
| 600111 | 2017 | 0.462 | 0    | 1.95559  | 3.8243317 | 23.7486  | 0.065428 | 30    |
| 600111 | 2017 | 0.462 | 0    | 1.95559  | 3.8243317 | 23.7486  | 0.065428 | 30    |
| 600111 | 2017 | 0.462 | 0    | 1.95559  | 3.82E+00  | 23.7486  | 0.065428 | 30    |
| 600111 | 2017 | 0.462 | 0    | 1.95559  | 3.82E+00  | 23.7486  | 0.065428 | 30    |
| 600010 | 2017 | 0.026 | 0    | 1.95559  | 3.82E+00  | 25.71126 | 0.041401 | 54.66 |
| 300239 | 2017 | 0.264 | 0    | 1.95559  | 3.82E+00  | 20.69439 | 0.030718 | 32.36 |
| 600111 | 2017 | 0.462 | 0    | 1.95559  | 3.82E+00  | 23.7486  | 0.065428 | 30    |
| 600111 | 2017 | -0.62 | 0    | 1.95559  | 3.82E+00  | 23.7486  | 0.065428 | 30    |
| 600111 | 2017 | 0.462 | 0    | 1.95559  | 3.82E+00  | 23.7486  | 0.065428 | 30    |
| 600967 | 2017 | -0.54 | 0    | 1.95559  | 3.8243317 | 23.6233  | 0.066902 | 51.68 |
| 600111 | 2017 | -0.2  | 0    | 1.95559  | 3.8243317 | 23.7486  | 0.065428 | 30    |
| 600967 | 2017 | -0.5  | 0    | 1.95559  | 3.8243317 | 23.6233  | 0.066902 | 51.68 |
| 600010 | 2017 | 0.026 | 0    | 1.95559  | 3.8243317 | 25.71126 | 0.041401 | 54.66 |
| 600111 | 2017 | 0.462 | 0    | 1.95559  | 3.8243317 | 23.7486  | 0.065428 | 30    |
| 600111 | 2017 | 0.462 | 0    | 1.95559  | 3.8243317 | 23.7486  | 0.065428 | 30    |
| 600111 | 2017 | -0.24 | 0    | 1.95559  | 3.8243317 | 23.7486  | 0.065428 | 30    |
| 600111 | 2017 | -0.22 | 0    | 1.95559  | 3.8243317 | 23.7486  | 0.065428 | 30    |
| 600010 | 2017 | 0.026 | 0    | 1.95559  | 3.8243317 | 25.71126 | 0.041401 | 54.66 |
| 600967 | 2017 | -0.56 | 0    | 1.95559  | 3.8243317 | 23.6233  | 0.066902 | 51.68 |
| 600111 | 2017 | -0.72 | 0    | 1.95559  | 3.8243317 | 23.6103  | 0.065428 | 30    |
| 600111 | 2017 | 0.462 | 0    | 1.95559  | 3.8243317 | 23.7486  | 0.065428 | 30    |
| 600538 | 2017 | 0.364 | 0.05 | 1.104523 | 1.2199699 | 20.47063 | 0.003572 | 28.46 |
| 806    | 2017 | -0.28 | 0.05 | 1.104523 | 1.2199699 | 21.93617 | 0.006407 | 47.79 |
| 603869 | 2017 | 0.75  | 0.05 | 1.104523 | 1.2199699 | 22.25252 | 0.073021 | 34.96 |
| 600538 | 2017 | 0.364 | 0.05 | 1.104523 | 1.2199699 | 20.3609  | 0.003572 | 28.46 |
| 600538 | 2017 | 0.364 | 0.05 | 1.104523 | 1.2199699 | 20.47063 | 0.003572 | 28.46 |
| 806    | 2017 | 0.795 | 0.05 | 1.104523 | 1.2199699 | 21.93617 | 0.006407 | 47.79 |
| 603869 | 2017 | 0.75  | 0.05 | 1.104523 | 1.2199699 | 22.54081 | 0.073021 | 34.96 |
| 806    | 2017 | 0.044 | 0.05 | 1.104523 | 1.2199699 | 21.93617 | 0.006407 | 47.79 |
| 603869 | 2017 | 0.75  | 0.05 | 1.104523 | 1.2199699 | 22.54081 | 0.073021 | 34.96 |
| 806    | 2017 | 0.795 | 0.05 | 1.104523 | 1.2199699 | 21.93617 | 0.006407 | 47.79 |
| 603869 | 2017 | 0.75  | 0.05 | 1.104523 | 1.2199699 | 22.54081 | 0.073021 | 34.96 |
| 806    | 2017 | 0.132 | 0.05 | 1.104523 | 1.2199699 | 21.93617 | 0.006407 | 47.79 |
| 603869 | 2017 | 0.75  | 0.05 | 1.104523 | 1.2199699 | 22.54081 | 0.073021 | 34.96 |
| 806    | 2017 | 0.795 | 0.05 | 1.104523 | 1.2199699 | 21.93617 | 0.006407 | 47.79 |
| 806    | 2017 | -0.53 | 0.05 | 1.104523 | 1.2199699 | 21.93617 | 0.006407 | 47.79 |
| 806    | 2017 | 0.795 | 0.05 | 1.104523 | 1.2199699 | 21.50389 | 0.006407 | 47.79 |
| 603869 | 2017 | -0.13 | 0.05 | 1.104523 | 1.2199699 | 22.54081 | 0.073021 | 34.96 |
| 603869 | 2017 | -0.13 | 0.05 | 1.104523 | 1.2199699 | 22.54081 | 0.073021 | 34.96 |
| 806    | 2017 | -0.2  | 0.05 | 1.104523 | 1.2199699 | 21.93617 | 0.006407 | 47.79 |
| 603869 | 2017 | 0.63  | 0.05 | 1.104523 | 1.2199699 | 22.54081 | 0.073021 | 34.96 |
| 806    | 2017 | 0.795 | 0.05 | 1.104523 | 1.2199699 | 21.93617 | 0.006407 | 47.79 |
| 806    | 2017 | 0.795 | 0.05 | 1.104523 | 1.2199699 | 21.93617 | 0.006407 | 47.79 |
| 603869 | 2017 | -0.57 | 0.05 | 1.104523 | 1.22E+00  | 22.54081 | 0.073021 | 34.96 |
| 300278 | 2017 | 0.585 | 0.03 | 1.49393  | 2.23E+00  | 22.24434 | 0.039822 | 30.15 |
| 300278 | 2017 | 0.585 | 0.03 | 1.49393  | 2.23E+00  | 22.24434 | 0.039822 | 30.15 |
| 300278 | 2017 | -0.41 | 0.03 | 1.49393  | 2.2318258 | 22.24434 | 0.039822 | 30.15 |
| 300278 | 2017 | -0.74 | 0.03 | 1.49393  | 2.2318258 | 22.24434 | 0.039822 | 30.15 |

|        |      |       |      |          |            |          |          |       |
|--------|------|-------|------|----------|------------|----------|----------|-------|
| 300278 | 2017 | -0.36 | 0.03 | 1.49393  | 2.2318258  | 21.71517 | 0.039822 | 30.15 |
| 300278 | 2017 | -0.74 | 0.03 | 1.49393  | 2.2318258  | 22.24434 | 0.039822 | 30.15 |
| 300278 | 2017 | -0.36 | 0.03 | 1.49393  | 2.2318258  | 22.24434 | 0.039822 | 30.15 |
| 300278 | 2017 | 0.585 | 0.03 | 1.49393  | 2.2318258  | 22.24434 | 0.039822 | 30.15 |
| 300278 | 2017 | -0.74 | 0.03 | 1.49393  | 2.2318258  | 22.24434 | 0.039822 | 30.15 |
| 300278 | 2017 | 0.585 | 0.03 | 1.49393  | 2.2318258  | 22.24434 | 0.039822 | 30.15 |
| 300278 | 2017 | 0.585 | 0.03 | 1.49393  | 2.2318258  | 22.24434 | 0.039822 | 30.15 |
| 300278 | 2017 | 0.585 | 0.03 | 1.49393  | 2.2318258  | 22.24434 | 0.039822 | 30.15 |
| 600406 | 2017 | 0.878 | 0.02 | 0.842732 | 0.71019654 | 24.55143 | 0.17513  | 56.96 |
| 300402 | 2017 | 0.106 | 0.02 | 0.842732 | 0.71019654 | 20.97644 | 0.017398 | 57.52 |
| 2080   | 2017 | 0.775 | 0.02 | 0.842732 | 0.71019654 | 23.8341  | 0.088827 | 60.24 |
| 2080   | 2017 | 0.562 | 0.02 | 0.842732 | 0.71019654 | 23.8341  | 0.088827 | 60.24 |
| 300339 | 2017 | 1.177 | 0.02 | 0.842732 | 0.71019654 | 22.4182  | 0.066588 | 17.88 |
| 2182   | 2017 | 0.111 | 0.02 | 0.842732 | 0.71019654 | 22.03744 | 0.098719 | 32.03 |
| 2315   | 2017 | 1.264 | 0.02 | 0.842732 | 0.71019654 | 21.66377 | 0.036829 | 55.64 |
| 600713 | 2017 | -0.99 | 0.02 | 0.842732 | 0.71019654 | 23.49117 | 0.097678 | 26.94 |
| 603111 | 2017 | 0.13  | 0.02 | 0.842732 | 0.71019654 | 22.71218 | 0.07275  | 9.5   |
| 300356 | 2017 | 0.123 | 0.02 | 0.842732 | 0.71019654 | 21.21508 | -0.38052 | 25.67 |
| 603111 | 2017 | 0.069 | 0.02 | 0.842732 | 0.71019654 | 22.71218 | 0.07275  | 9.5   |
| 525    | 2017 | 0.865 | 0.02 | 0.842732 | 0.71019654 | 23.24335 | 0.162642 | 51.75 |
| 525    | 2017 | 0.865 | 0.02 | 0.842732 | 0.71019654 | 23.24335 | 0.162642 | 51.75 |
| 2315   | 2017 | 0.077 | 0.02 | 0.842732 | 0.71019654 | 21.6592  | 0.036829 | 55.64 |
| 2380   | 2017 | 0.496 | 0.02 | 0.842732 | 0.71019654 | 21.60425 | 0.054334 | 25.46 |
| 600970 | 2017 | -0.52 | 0.02 | 0.842732 | 0.71019654 | 23.26932 | 0.123383 | 39.7  |
| 600682 | 2017 | 0.349 | 0.02 | 0.842732 | 0.71019654 | 23.92308 | 0.103871 | 27.32 |
| 600268 | 2017 | -0.52 | 0.02 | 0.842732 | 0.71019654 | 22.98511 | 0.054815 | 54.55 |
| 603518 | 2017 | -0.54 | 0.02 | 0.842732 | 0.71019654 | 22.61285 | 0.119823 | 31.73 |
| 300209 | 2017 | 1.469 | 0.02 | 0.842732 | 0.71019654 | 21.72157 | 0.046901 | 21.25 |
| 2080   | 2017 | 0.775 | 0.02 | 0.842732 | 0.71019654 | 23.8341  | 0.088827 | 60.24 |
| 600268 | 2017 | -0.52 | 0.02 | 0.842732 | 0.71019654 | 22.98511 | 0.054815 | 54.55 |
| 600713 | 2017 | -0.99 | 0.02 | 0.842732 | 0.71019654 | 23.49117 | 0.097678 | 26.94 |
| 600268 | 2017 | 0.809 | 0.02 | 0.842732 | 0.71019654 | 22.98511 | 0.054815 | 54.55 |
| 919    | 2017 | 0.413 | 0.02 | 0.842732 | 0.71019654 | 22.07315 | 0.056627 | 45.23 |
| 600682 | 2017 | 0.349 | 0.02 | 0.842732 | 0.71019654 | 23.03321 | 0.103871 | 27.32 |
| 603528 | 2017 | 0.761 | 0.02 | 0.842732 | 0.71019654 | 21.43426 | 0.073913 | 63.33 |
| 600889 | 2017 | -0.98 | 0.02 | 0.842732 | 0.71019654 | 21.33595 | -0.26323 | 33.02 |
| 600970 | 2017 | 0.805 | 0.02 | 0.842732 | 0.71019654 | 23.26932 | 0.123383 | 39.7  |
| 600970 | 2017 | 0.026 | 0.02 | 0.842732 | 0.71019654 | 23.26932 | 0.123383 | 39.7  |
| 2747   | 2017 | 0.409 | 0.02 | 0.842732 | 0.71019654 | 21.89552 | 0.062491 | 35.52 |
| 525    | 2017 | 0.824 | 0.02 | 0.842732 | 0.71019654 | 23.24335 | 0.162642 | 51.75 |
| 2090   | 2017 | 1.024 | 0.02 | 0.842732 | 0.71019654 | 22.10228 | 0.113189 | 37.15 |
| 600501 | 2017 | 0.023 | 0.02 | 0.842732 | 0.71019654 | 22.27516 | 0.013825 | 25.2  |
| 2546   | 2017 | 0.765 | 0.02 | 0.842732 | 0.71019654 | 21.93704 | 0.037166 | 42.51 |
| 600775 | 2017 | 0.421 | 0.02 | 0.842732 | 0.71019654 | 22.45766 | 0.043725 | 26.59 |
| 525    | 2017 | 0.84  | 0.02 | 0.842732 | 0.71019654 | 23.24335 | 0.162642 | 51.75 |
| 603518 | 2017 | -0.54 | 0.02 | 0.842732 | 0.71019654 | 22.61285 | 0.119823 | 31.73 |
| 300356 | 2017 | 0.521 | 0.02 | 0.842732 | 0.71019654 | 21.32978 | -0.38052 | 25.67 |
| 2090   | 2017 | 1.024 | 0.02 | 0.842732 | 0.71019654 | 22.10228 | 0.113189 | 37.15 |
| 300447 | 2017 | 0.593 | 0.02 | 0.842732 | 0.71019654 | 21.23738 | 0.084641 | 49.5  |
| 600775 | 2017 | 0.437 | 0.02 | 0.842732 | 0.71019654 | 22.45766 | 0.043725 | 26.59 |
| 727    | 2017 | 0.332 | 0.02 | 0.842732 | 0.71019654 | 24.24303 | 0.003414 | 24.51 |
| 300447 | 2017 | 0.521 | 0.02 | 0.842732 | 0.71019654 | 21.29327 | 0.084641 | 49.5  |
| 600501 | 2017 | -0.4  | 0.02 | 0.842732 | 0.71019654 | 22.27516 | 0.013825 | 25.2  |
| 2080   | 2017 | 0.775 | 0.02 | 0.842732 | 0.71019654 | 23.0802  | 0.088827 | 60.24 |

|        |      |       |      |          |            |          |          |       |
|--------|------|-------|------|----------|------------|----------|----------|-------|
| 2165   | 2017 | 0.711 | 0.02 | 0.842732 | 0.71019654 | 21.79887 | 0.029964 | 28    |
| 600406 | 2017 | 0.827 | 0.02 | 0.842732 | 0.71019654 | 24.55143 | 0.17513  | 56.96 |
| 2747   | 2017 | 0.74  | 0.02 | 0.842732 | 0.71019654 | 21.89552 | 0.062491 | 35.52 |
| 600775 | 2017 | 0.2   | 0.02 | 0.842732 | 0.71019654 | 22.45766 | 0.043725 | 26.59 |
| 603111 | 2017 | -0.23 | 0.02 | 0.842732 | 0.71019654 | 22.71218 | 0.07275  | 9.5   |
| 2080   | 2017 | 0.003 | 0.02 | 0.842732 | 0.71019654 | 23.8341  | 0.088827 | 60.24 |
| 2380   | 2017 | 0.496 | 0.02 | 0.842732 | 0.71019654 | 21.60425 | 0.054334 | 25.46 |
| 600268 | 2017 | -0.28 | 0.02 | 0.842732 | 0.71019654 | 22.98511 | 0.054815 | 54.55 |
| 300339 | 2017 | 1.177 | 0.02 | 0.842732 | 0.71019654 | 22.4182  | 0.066588 | 17.88 |
| 2080   | 2017 | -0.02 | 0.02 | 0.842732 | 0.71019654 | 23.8341  | 0.088827 | 60.24 |
| 300284 | 2017 | -0.53 | 0.02 | 0.842732 | 0.71019654 | 22.66084 | 0.127373 | 21.78 |
| 2090   | 2017 | 1.024 | 0.02 | 0.842732 | 0.71019654 | 22.10228 | 0.113189 | 37.15 |
| 300172 | 2017 | 0.34  | 0.02 | 0.842732 | 0.71019654 | 21.42558 | 0.099364 | 28.98 |
| 300284 | 2017 | 0.062 | 0.02 | 0.842732 | 0.71019654 | 22.66084 | 0.127373 | 21.78 |
| 600970 | 2017 | 0.198 | 0.02 | 0.842732 | 0.71019654 | 23.26932 | 0.123383 | 39.7  |
| 600959 | 2017 | -0.66 | 0.02 | 0.842732 | 0.71019654 | 24.19534 | 0.050203 | 18.04 |
| 2546   | 2017 | 0.51  | 0.02 | 0.842732 | 0.71019654 | 21.93704 | 0.037166 | 42.51 |
| 300585 | 2017 | 0.112 | 0.02 | 0.842732 | 0.71019654 | 20.26983 | 0.13145  | 36.35 |
| 2546   | 2017 | 0.601 | 0.02 | 0.842732 | 0.71019654 | 21.93704 | 0.037166 | 42.51 |
| 2315   | 2017 | 0.715 | 0.02 | 0.842732 | 0.71019654 | 21.66377 | 0.036829 | 55.64 |
| 300172 | 2017 | 0.87  | 0.02 | 0.842732 | 0.71019654 | 21.42558 | 0.099364 | 28.98 |
| 600501 | 2017 | -0.4  | 0.02 | 0.842732 | 0.71019654 | 22.27516 | 0.013825 | 25.2  |
| 600970 | 2017 | 0.276 | 0.02 | 0.842732 | 0.71019654 | 23.26932 | 0.123383 | 39.7  |
| 300339 | 2017 | 1.177 | 0.02 | 0.842732 | 0.71019654 | 22.4182  | 0.066588 | 17.88 |
| 600268 | 2017 | 0.015 | 0.02 | 0.842732 | 0.71019654 | 22.98511 | 0.054815 | 54.55 |
| 600268 | 2017 | -0.14 | 0.02 | 0.842732 | 0.71019654 | 22.98511 | 0.054815 | 54.55 |
| 2090   | 2017 | 0.362 | 0.02 | 0.842732 | 0.71019654 | 22.10228 | 0.113189 | 37.15 |
| 300575 | 2017 | 0.72  | 0.02 | 0.842732 | 0.71019654 | 21.26632 | 0.116377 | 30.1  |
| 603111 | 2017 | 0.025 | 0.02 | 0.842732 | 0.71019654 | 22.71218 | 0.07275  | 9.5   |
| 2080   | 2017 | 0.113 | 0.02 | 0.842732 | 0.71019654 | 23.8341  | 0.088827 | 60.24 |
| 2090   | 2017 | 1.024 | 0.02 | 0.842732 | 0.71019654 | 22.10228 | 0.113189 | 37.15 |
| 2090   | 2017 | 1.024 | 0.02 | 0.842732 | 0.71019654 | 22.10228 | 0.113189 | 37.15 |
| 300284 | 2017 | 0.297 | 0.02 | 0.842732 | 0.71019654 | 22.66084 | 0.127373 | 21.78 |
| 603528 | 2017 | 1.07  | 0.02 | 0.842732 | 0.71019654 | 21.43426 | 0.073913 | 63.33 |
| 727    | 2017 | 0.534 | 0.02 | 0.842732 | 0.71019654 | 24.24303 | 0.003414 | 24.51 |
| 600775 | 2017 | 0.301 | 0.02 | 0.842732 | 7.10E-01   | 21.85957 | 0.043725 | 26.59 |
| 2165   | 2017 | 0.711 | 0.02 | 0.842732 | 7.10E-01   | 21.79887 | 0.029964 | 28    |
| 600268 | 2017 | 0.809 | 0.02 | 0.842732 | 7.10E-01   | 22.98511 | 0.054815 | 54.55 |
| 300172 | 2017 | -0.17 | 0.02 | 0.842732 | 7.10E-01   | 21.42558 | 0.099364 | 28.98 |
| 600970 | 2017 | -0.08 | 0.02 | 0.842732 | 7.10E-01   | 23.26932 | 0.123383 | 39.7  |
| 2080   | 2017 | 0.277 | 0.02 | 0.842732 | 7.10E-01   | 23.8341  | 0.088827 | 60.24 |
| 2024   | 2017 | 0.071 | 0.02 | 0.842732 | 0.71019654 | 25.74206 | 0.048423 | 20.96 |
| 300284 | 2017 | 0.794 | 0.02 | 0.842732 | 0.71019654 | 22.66084 | 0.127373 | 21.78 |
| 603066 | 2017 | -0.2  | 0.02 | 0.842732 | 0.71019654 | 20.86412 | 0.095032 | 45.98 |
| 300284 | 2017 | -0.53 | 0.02 | 0.842732 | 0.71019654 | 22.66084 | 0.127373 | 21.78 |
| 727    | 2017 | -0.33 | 0.02 | 0.842732 | 0.71019654 | 24.24303 | 0.003414 | 24.51 |
| 600406 | 2017 | 0.772 | 0.02 | 0.842732 | 0.71019654 | 24.55143 | 0.17513  | 56.96 |
| 300209 | 2017 | 0.617 | 0.02 | 0.842732 | 0.71019654 | 21.72157 | 0.046901 | 21.25 |
| 2380   | 2017 | 0.496 | 0.02 | 0.842732 | 0.71019654 | 21.60885 | 0.054334 | 25.46 |
| 727    | 2017 | 0.534 | 0.02 | 0.842732 | 0.71019654 | 24.24303 | 0.003414 | 24.51 |
| 600562 | 2017 | 0.008 | 0.02 | 0.842732 | 0.71019654 | 21.71199 | 0.094682 | 26.48 |
| 600406 | 2017 | 0.233 | 0.02 | 0.842732 | 0.71019654 | 24.55143 | 0.17513  | 56.96 |
| 300585 | 2017 | 0.517 | 0.02 | 0.842732 | 0.71019654 | 20.26983 | 0.13145  | 36.35 |
| 2747   | 2017 | 0.496 | 0.02 | 0.842732 | 0.71019654 | 21.89552 | 0.062491 | 35.52 |

|        |      |       |      |          |            |          |          |         |
|--------|------|-------|------|----------|------------|----------|----------|---------|
| 2090   | 2017 | 1.024 | 0.02 | 0.842732 | 0.71019654 | 22.10228 | 0.113189 | 37.15   |
| 300209 | 2017 | 1.469 | 0.02 | 0.842732 | 0.71019654 | 21.72157 | 0.046901 | 21.25   |
| 300575 | 2017 | 0.72  | 0.02 | 0.842732 | 0.71019654 | 21.26632 | 0.116377 | 30.1    |
| 600889 | 2017 | -0.98 | 0.02 | 0.842732 | 0.71019654 | 21.33595 | -0.26323 | 33.02   |
| 600268 | 2017 | -0.52 | 0.02 | 0.842732 | 0.71019654 | 22.98511 | 0.054815 | 54.55   |
| 2182   | 2017 | 0.683 | 0.02 | 0.842732 | 7.10E-01   | 22.03744 | 0.098719 | 32.03   |
| 300585 | 2017 | -0.22 | 0.02 | 0.842732 | 7.10E-01   | 20.27012 | 0.13145  | 36.35   |
| 2090   | 2017 | 1.024 | 0.02 | 0.842732 | 7.10E-01   | 21.57551 | 0.113189 | 37.15   |
| 600501 | 2017 | -0.4  | 0.02 | 0.842732 | 7.10E-01   | 22.27516 | 0.013825 | 25.2    |
| 300172 | 2017 | 0.87  | 0.02 | 0.842732 | 7.10E-01   | 21.42558 | 0.099364 | 28.98   |
| 603066 | 2017 | -0.49 | 0.02 | 0.842732 | 7.10E-01   | 20.88745 | 0.095032 | 45.98   |
| 603111 | 2017 | 0.069 | 0.02 | 0.842732 | 7.10E-01   | 22.71218 | 0.07275  | 9.5     |
| 2747   | 2017 | 0.686 | 0.02 | 0.842732 | 7.10E-01   | 21.89552 | 0.062491 | 35.52   |
| 2090   | 2017 | 1.024 | 0.02 | 0.842732 | 0.71019654 | 22.10228 | 0.113189 | 37.15   |
| 2747   | 2017 | 0.961 | 0.02 | 0.842732 | 0.71019654 | 21.89552 | 0.062491 | 35.52   |
| 600970 | 2017 | 0.138 | 0.02 | 0.842732 | 0.71019654 | 23.26932 | 0.123383 | 39.7    |
| 603018 | 2017 | 0.789 | 0.02 | 0.842732 | 0.71019654 | 22.38518 | 0.138242 | 7.84    |
| 600406 | 2017 | 0.836 | 0.02 | 0.842732 | 0.71019654 | 24.22294 | 0.17513  | 56.96   |
| 300447 | 2017 | 0.5   | 0.02 | 0.842732 | 0.71019654 | 21.29327 | 0.084641 | 49.5    |
| 600970 | 2017 | -0.52 | 0.02 | 0.842732 | 0.71019654 | 23.26932 | 0.123383 | 39.7    |
| 300284 | 2017 | 0.794 | 0.02 | 0.842732 | 0.71019654 | 22.66084 | 0.127373 | 21.78   |
| 600406 | 2017 | 0.691 | 0.02 | 0.842732 | 0.71019654 | 24.55143 | 0.17513  | 56.96   |
| 300339 | 2017 | 1.177 | 0.02 | 0.842732 | 0.71019654 | 22.4182  | 0.066588 | 17.88   |
| 525    | 2017 | 0.865 | 0.02 | 0.842732 | 0.71019654 | 22.75735 | 0.162642 | 51.75   |
| 2182   | 2017 | -0.64 | 0.02 | 0.842732 | 0.71019654 | 22.03744 | 0.098719 | 32.03   |
| 603018 | 2017 | -0.2  | 0.02 | 0.842732 | 0.71019654 | 22.38518 | 0.138242 | 7.84    |
| 919    | 2017 | 0.413 | 0.02 | 0.842732 | 0.71019654 | 22.07315 | 0.056627 | 45.23   |
| 300356 | 2017 | 0.521 | 0.02 | 0.842732 | 0.71019654 | 21.32978 | -0.38052 | 25.67   |
| 300585 | 2017 | -0.22 | 0.02 | 0.842732 | 0.71019654 | 20.26983 | 0.13145  | 36.35   |
| 600713 | 2017 | -0.99 | 0.02 | 0.842732 | 0.71019654 | 23.49117 | 0.097678 | 26.94   |
| 2080   | 2017 | 0.562 | 0.02 | 0.842732 | 0.71019654 | 23.8341  | 0.088827 | 60.24   |
| 2380   | 2017 | 0.496 | 0.02 | 0.842732 | 0.71019654 | 21.60425 | 0.054334 | 25.46   |
| 727    | 2017 | 0.332 | 0.02 | 0.842732 | 0.71019654 | 24.24303 | 0.003414 | 24.51   |
| 2024   | 2017 | 0.071 | 0.02 | 0.842732 | 0.71019654 | 25.74206 | 0.048423 | 20.96   |
| 300447 | 2017 | 0.541 | 0.02 | 0.842732 | 0.71019654 | 21.29327 | 0.084641 | 49.5    |
| 300339 | 2017 | 1.177 | 0.02 | 0.842732 | 0.71019654 | 22.4182  | 0.066588 | 17.88   |
| 919    | 2017 | 0.413 | 0.02 | 0.842732 | 0.71019654 | 21.46033 | 0.056627 | 45.23   |
| 601688 | 2017 | 0.532 | 0.02 | 0.842732 | 0.71019654 | 25.74206 | 0.106196 | 23.9445 |
| 2182   | 2017 | -0.49 | 0.02 | 0.842732 | 0.71019654 | 22.03744 | 0.098719 | 32.03   |
| 600562 | 2017 | 0.532 | 0.02 | 0.842732 | 0.71019654 | 21.71199 | 0.094682 | 26.48   |
| 2182   | 2017 | 0.683 | 0.02 | 0.842732 | 0.71019654 | 22.03744 | 0.098719 | 32.03   |
| 919    | 2017 | 0.413 | 0.02 | 0.842732 | 0.71019654 | 22.07315 | 0.056627 | 45.23   |
| 600562 | 2017 | 0.008 | 0.02 | 0.842732 | 0.71019654 | 21.71199 | 0.094682 | 26.48   |
| 2380   | 2017 | 0.496 | 0.02 | 0.842732 | 0.71019654 | 21.60425 | 0.054334 | 25.46   |
| 300172 | 2017 | 0.92  | 0.02 | 0.842732 | 0.71019654 | 21.42558 | 0.099364 | 28.98   |
| 2315   | 2017 | 1.293 | 0.02 | 0.842732 | 0.71019654 | 21.66377 | 0.036829 | 55.64   |
| 300284 | 2017 | -0.53 | 0.02 | 0.842732 | 7.10E-01   | 22.66084 | 0.127373 | 21.78   |
| 600775 | 2017 | 0.353 | 0.02 | 0.842732 | 7.10E-01   | 22.45766 | 0.043725 | 26.59   |
| 603111 | 2017 | 0.29  | 0.02 | 0.842732 | 7.10E-01   | 22.71218 | 0.07275  | 9.5     |
| 2380   | 2017 | 0.496 | 0.02 | 0.842732 | 7.10E-01   | 21.60425 | 0.054334 | 25.46   |
| 525    | 2017 | 0.865 | 0.02 | 0.842732 | 7.10E-01   | 23.24335 | 0.162642 | 51.75   |
| 300339 | 2017 | 1.177 | 0.02 | 0.842732 | 0.71019654 | 22.23909 | 0.066588 | 17.88   |
| 603528 | 2017 | 0.143 | 0.02 | 0.842732 | 0.71019654 | 21.43426 | 0.073913 | 63.33   |
| 2080   | 2017 | -0.45 | 0.02 | 0.842732 | 0.71019654 | 23.8341  | 0.088827 | 60.24   |

|        |      |       |      |          |            |          |          |       |
|--------|------|-------|------|----------|------------|----------|----------|-------|
| 600268 | 2017 | -0.33 | 0.02 | 0.842732 | 0.71019654 | 22.98511 | 0.054815 | 54.55 |
| 2182   | 2017 | -0.64 | 0.02 | 0.842732 | 0.71019654 | 21.80272 | 0.098719 | 32.03 |
| 525    | 2017 | 0.857 | 0.02 | 0.842732 | 0.71019654 | 23.24335 | 0.162642 | 51.75 |
| 600562 | 2017 | 0.039 | 0.02 | 0.842732 | 0.71019654 | 21.71199 | 0.094682 | 26.48 |
| 600970 | 2017 | -0.52 | 0.02 | 0.842732 | 0.71019654 | 23.26932 | 0.123383 | 39.7  |
| 300447 | 2017 | -0.07 | 0.02 | 0.842732 | 0.71019654 | 21.29327 | 0.084641 | 49.5  |
| 2080   | 2017 | -0.04 | 0.02 | 0.842732 | 0.71019654 | 23.8341  | 0.088827 | 60.24 |
| 600268 | 2017 | -0.52 | 0.02 | 0.842732 | 0.71019654 | 22.98511 | 0.054815 | 54.55 |
| 600970 | 2017 | 0.805 | 0.02 | 0.842732 | 0.71019654 | 24.11491 | 0.123383 | 39.7  |
| 603111 | 2017 | 0.141 | 0.02 | 0.842732 | 0.71019654 | 22.71218 | 0.07275  | 9.5   |
| 603111 | 2017 | 0.275 | 0.02 | 0.842732 | 0.71019654 | 22.71218 | 0.07275  | 9.5   |
| 600406 | 2017 | 1.133 | 0.02 | 0.842732 | 0.71019654 | 24.55143 | 0.17513  | 56.96 |
| 600889 | 2017 | -0.98 | 0.02 | 0.842732 | 0.71019654 | 21.33595 | -0.26323 | 33.02 |
| 603900 | 2017 | -0.97 | 0.02 | 0.842732 | 0.71019654 | 21.76386 | 0.135376 | 30.69 |
| 2165   | 2017 | 0.711 | 0.02 | 0.842732 | 0.71019654 | 21.79887 | 0.029964 | 28    |
| 603066 | 2017 | -0.49 | 0.02 | 0.842732 | 0.71019654 | 20.88745 | 0.095032 | 45.98 |
| 600562 | 2017 | 0.384 | 0.02 | 0.842732 | 0.71019654 | 21.27638 | 0.094682 | 26.48 |
| 603018 | 2017 | -0    | 0.02 | 0.842732 | 0.71019654 | 22.38518 | 0.138242 | 7.84  |
| 600268 | 2017 | 0.242 | 0.02 | 0.842732 | 0.71019654 | 22.98511 | 0.054815 | 54.55 |
| 600501 | 2017 | -0.4  | 0.02 | 0.842732 | 0.71019654 | 22.27516 | 0.013825 | 25.2  |
| 603018 | 2017 | 0.259 | 0.02 | 0.842732 | 0.71019654 | 22.38518 | 0.138242 | 7.84  |
| 600682 | 2017 | 0.349 | 0.02 | 0.842732 | 0.71019654 | 23.92308 | 0.103871 | 27.32 |
| 600970 | 2017 | 0.474 | 0.02 | 0.842732 | 0.71019654 | 23.26932 | 0.123383 | 39.7  |
| 300284 | 2017 | 0.794 | 0.02 | 0.842732 | 0.71019654 | 22.66084 | 0.127373 | 21.78 |
| 2546   | 2017 | -0.12 | 0.02 | 0.842732 | 0.71019654 | 21.93704 | 0.037166 | 42.51 |
| 603111 | 2017 | 0.069 | 0.02 | 0.842732 | 0.71019654 | 22.71218 | 0.07275  | 9.5   |
| 2165   | 2017 | 0.711 | 0.02 | 0.842732 | 0.71019654 | 21.79887 | 0.029964 | 28    |
| 600406 | 2017 | 1.022 | 0.02 | 0.842732 | 0.71019654 | 24.55143 | 0.17513  | 56.96 |
| 2182   | 2017 | 0.021 | 0.02 | 0.842732 | 0.71019654 | 22.03744 | 0.098719 | 32.03 |
| 2315   | 2017 | 1.402 | 0.02 | 0.842732 | 0.71019654 | 21.66377 | 0.036829 | 55.64 |
| 300172 | 2017 | 1.003 | 0.02 | 0.842732 | 0.71019654 | 21.1768  | 0.099364 | 28.98 |
| 727    | 2017 | 0.59  | 0.02 | 0.842732 | 0.71019654 | 24.24303 | 0.003414 | 24.51 |
| 603018 | 2017 | 0.789 | 0.02 | 0.842732 | 0.71019654 | 22.38518 | 0.138242 | 7.84  |
| 300402 | 2017 | 0.106 | 0.02 | 0.842732 | 0.71019654 | 20.97644 | 0.017398 | 57.52 |
| 603018 | 2017 | -0.09 | 0.02 | 0.842732 | 0.71019654 | 22.29032 | 0.138242 | 7.84  |
| 600268 | 2017 | -0.14 | 0.02 | 0.842732 | 0.71019654 | 22.98511 | 0.054815 | 54.55 |
| 600268 | 2017 | 0.809 | 0.02 | 0.842732 | 0.71019654 | 22.98511 | 0.054815 | 54.55 |
| 300356 | 2017 | 0.275 | 0.02 | 0.842732 | 0.71019654 | 21.32978 | -0.38052 | 25.67 |
| 2747   | 2017 | 1.402 | 0.02 | 0.842732 | 0.71019654 | 21.89552 | 0.062491 | 35.52 |
| 2546   | 2017 | 0.829 | 0.02 | 0.842732 | 0.71019654 | 21.83106 | 0.037166 | 42.51 |
| 727    | 2017 | 0.59  | 0.02 | 0.842732 | 0.71019654 | 23.24441 | 0.003414 | 24.51 |
| 2747   | 2017 | 0.929 | 0.02 | 0.842732 | 0.71019654 | 21.89552 | 0.062491 | 35.52 |
| 600501 | 2017 | -0.4  | 0.02 | 0.842732 | 0.71019654 | 22.27516 | 0.013825 | 25.2  |
| 600406 | 2017 | 0.878 | 0.02 | 0.842732 | 0.71019654 | 24.55143 | 0.17513  | 56.96 |
| 2090   | 2017 | 0.635 | 0.02 | 0.842732 | 0.71019654 | 22.10228 | 0.113189 | 37.15 |
| 600501 | 2017 | 0.023 | 0.02 | 0.842732 | 0.71019654 | 22.27516 | 0.013825 | 25.2  |
| 600501 | 2017 | 0.927 | 0.02 | 0.842732 | 0.71019654 | 22.27516 | 0.013825 | 25.2  |
| 600501 | 2017 | 0.17  | 0.02 | 0.842732 | 0.71019654 | 22.27516 | 0.013825 | 25.2  |
| 2024   | 2017 | 0.071 | 0.02 | 0.842732 | 0.71019654 | 25.65914 | 0.048423 | 20.96 |
| 300585 | 2017 | 0.112 | 0.02 | 0.842732 | 0.71019654 | 20.26983 | 0.13145  | 36.35 |
| 600268 | 2017 | -0.2  | 0.02 | 0.842732 | 0.71019654 | 22.98511 | 0.054815 | 54.55 |
| 2182   | 2017 | 0.047 | 0.02 | 0.842732 | 0.71019654 | 22.03744 | 0.098719 | 32.03 |
| 600970 | 2017 | 0.309 | 0.02 | 0.842732 | 0.71019654 | 23.26932 | 0.123383 | 39.7  |
| 2747   | 2017 | 0.74  | 0.02 | 0.842732 | 0.71019654 | 21.89552 | 0.062491 | 35.52 |

|        |      |       |      |          |            |          |          |         |
|--------|------|-------|------|----------|------------|----------|----------|---------|
| 300585 | 2017 | -0.22 | 0.02 | 0.842732 | 0.71019654 | 20.26983 | 0.13145  | 36.35   |
| 300339 | 2017 | 1.177 | 0.02 | 0.842732 | 0.71019654 | 22.4182  | 0.066588 | 17.88   |
| 600775 | 2017 | 0.437 | 0.02 | 0.842732 | 0.71019654 | 22.45766 | 0.043725 | 26.59   |
| 300284 | 2017 | -0.53 | 0.02 | 0.842732 | 0.71019654 | 22.66084 | 0.127373 | 21.78   |
| 2090   | 2017 | 1.024 | 0.02 | 0.842732 | 0.71019654 | 22.10228 | 0.113189 | 37.15   |
| 603066 | 2017 | -0.33 | 0.02 | 0.842732 | 0.71019654 | 20.88745 | 0.095032 | 45.98   |
| 600268 | 2017 | 0.147 | 0.02 | 0.842732 | 0.71019654 | 22.98511 | 0.054815 | 54.55   |
| 2080   | 2017 | 0.14  | 0.02 | 0.842732 | 0.71019654 | 23.8341  | 0.088827 | 60.24   |
| 600775 | 2017 | 0.2   | 0.02 | 0.842732 | 0.71019654 | 22.45766 | 0.043725 | 26.59   |
| 603018 | 2017 | 0.126 | 0.02 | 0.842732 | 0.71019654 | 22.38518 | 0.138242 | 7.84    |
| 300284 | 2017 | 0.794 | 0.02 | 0.842732 | 0.71019654 | 22.66084 | 0.127373 | 21.78   |
| 600501 | 2017 | -0.07 | 0.02 | 0.842732 | 0.71019654 | 22.27516 | 0.013825 | 25.2    |
| 300172 | 2017 | 0.031 | 0.02 | 0.842732 | 0.71019654 | 21.42558 | 0.099364 | 28.98   |
| 600501 | 2017 | -0.4  | 0.02 | 0.842732 | 0.71019654 | 22.12124 | 0.013825 | 25.2    |
| 603518 | 2017 | -0.54 | 0.02 | 0.842732 | 0.71019654 | 22.61285 | 0.119823 | 31.73   |
| 2165   | 2017 | 0.711 | 0.02 | 0.842732 | 0.71019654 | 21.79887 | 0.029964 | 28      |
| 600406 | 2017 | 1.133 | 0.02 | 0.842732 | 0.71019654 | 24.55143 | 0.17513  | 56.96   |
| 600889 | 2017 | -0.98 | 0.02 | 0.842732 | 0.71019654 | 21.24491 | -0.26323 | 33.02   |
| 600959 | 2017 | -0.88 | 0.02 | 0.842732 | 0.71019654 | 23.63643 | 0.050203 | 18.04   |
| 600970 | 2017 | -0.08 | 0.02 | 0.842732 | 0.71019654 | 23.26932 | 0.123383 | 39.7    |
| 600970 | 2017 | -0.52 | 0.02 | 0.842732 | 0.71019654 | 23.26932 | 0.123383 | 39.7    |
| 600775 | 2017 | 0.421 | 0.02 | 0.842732 | 0.71019654 | 22.45766 | 0.043725 | 26.59   |
| 603111 | 2017 | -0.01 | 0.02 | 0.842732 | 0.71019654 | 22.71218 | 0.07275  | 9.5     |
| 600775 | 2017 | 0.455 | 0.02 | 0.842732 | 7.10E-01   | 22.45766 | 0.043725 | 26.59   |
| 601688 | 2017 | 0.532 | 0.02 | 0.842732 | 7.10E-01   | 25.74206 | 0.106196 | 23.9445 |
| 603111 | 2017 | 0.275 | 0.02 | 0.842732 | 7.10E-01   | 22.71218 | 0.07275  | 9.5     |
| 2182   | 2017 | 0.021 | 0.02 | 0.842732 | 0.71019654 | 22.03744 | 0.098719 | 32.03   |
| 300209 | 2017 | 0.144 | 0.02 | 0.842732 | 0.71019654 | 21.37349 | 0.046901 | 21.25   |
| 2747   | 2017 | 0.71  | 0.02 | 0.842732 | 0.71019654 | 21.89552 | 0.062491 | 35.52   |
| 2315   | 2017 | 1.058 | 0.02 | 0.842732 | 0.71019654 | 21.66377 | 0.036829 | 55.64   |
| 727    | 2017 | 0.994 | 0.02 | 0.842732 | 0.71019654 | 24.24303 | 0.003414 | 24.51   |
| 2090   | 2017 | 0.362 | 0.02 | 0.842732 | 0.71019654 | 22.10228 | 0.113189 | 37.15   |
| 603900 | 2017 | 0.35  | 0.02 | 0.842732 | 0.71019654 | 21.76344 | 0.135376 | 30.69   |
| 727    | 2017 | -0.33 | 0.02 | 0.842732 | 0.71019654 | 24.24303 | 0.003414 | 24.51   |
| 300339 | 2017 | 1.177 | 0.02 | 0.842732 | 0.71019654 | 22.4182  | 0.066588 | 17.88   |
| 727    | 2017 | 0.573 | 0.02 | 0.842732 | 0.71019654 | 24.24303 | 0.003414 | 24.51   |
| 603111 | 2017 | 0.186 | 0.02 | 0.842732 | 0.71019654 | 22.71218 | 0.07275  | 9.5     |
| 603018 | 2017 | -0.09 | 0.02 | 0.842732 | 0.71019654 | 22.38518 | 0.138242 | 7.84    |
| 603111 | 2017 | -0.37 | 0.02 | 0.842732 | 0.71019654 | 22.71218 | 0.07275  | 9.5     |
| 2090   | 2017 | 0.59  | 0.02 | 0.842732 | 0.71019654 | 22.10228 | 0.113189 | 37.15   |
| 603111 | 2017 | 0.069 | 0.02 | 0.842732 | 0.71019654 | 22.52836 | 0.07275  | 9.5     |
| 727    | 2017 | -0.33 | 0.02 | 0.842732 | 0.71019654 | 24.24303 | 0.003414 | 24.51   |
| 600713 | 2017 | -0.99 | 0.02 | 0.842732 | 0.71019654 | 22.95789 | 0.097678 | 26.94   |
| 300284 | 2017 | -0.01 | 0.02 | 0.842732 | 0.71019654 | 22.66084 | 0.127373 | 21.78   |
| 600713 | 2017 | -0.99 | 0.02 | 0.842732 | 0.71019654 | 23.49117 | 0.097678 | 26.94   |
| 300284 | 2017 | -0.09 | 0.02 | 0.842732 | 0.71019654 | 23.1142  | 0.127373 | 21.78   |
| 2165   | 2017 | 0.711 | 0.02 | 0.842732 | 0.71019654 | 21.79887 | 0.029964 | 28      |
| 600959 | 2017 | -0.66 | 0.02 | 0.842732 | 0.71019654 | 24.19534 | 0.050203 | 18.04   |
| 601688 | 2017 | 0.532 | 0.02 | 0.842732 | 0.71019654 | 25.74206 | 0.106196 | 23.9445 |
| 2747   | 2017 | 0.519 | 0.02 | 0.842732 | 0.71019654 | 21.52544 | 0.062491 | 35.52   |
| 600406 | 2017 | 0.338 | 0.02 | 0.842732 | 0.71019654 | 24.55143 | 0.17513  | 56.96   |
| 600268 | 2017 | -0.01 | 0.02 | 0.842732 | 0.71019654 | 22.98511 | 0.054815 | 54.55   |
| 300209 | 2017 | 1.469 | 0.02 | 0.842732 | 0.71019654 | 21.72157 | 0.046901 | 21.25   |
| 600775 | 2017 | 0.305 | 0.02 | 0.842732 | 0.71019654 | 22.45766 | 0.043725 | 26.59   |

|        |      |       |      |          |            |          |          |       |
|--------|------|-------|------|----------|------------|----------|----------|-------|
| 300209 | 2017 | 0.617 | 0.02 | 0.842732 | 0.71019654 | 21.72157 | 0.046901 | 21.25 |
| 600959 | 2017 | 0.448 | 0.02 | 0.842732 | 0.71019654 | 24.19534 | 0.050203 | 18.04 |
| 2090   | 2017 | 1.024 | 0.02 | 0.842732 | 0.71019654 | 22.10228 | 0.113189 | 37.15 |
| 300585 | 2017 | 0.099 | 0.02 | 0.842732 | 0.71019654 | 20.26983 | 0.13145  | 36.35 |
| 600406 | 2017 | 1.042 | 0.02 | 0.842732 | 0.71019654 | 24.55143 | 0.17513  | 56.96 |
| 2024   | 2017 | 0.071 | 0.02 | 0.842732 | 0.71019654 | 25.74206 | 0.048423 | 20.96 |
| 300209 | 2017 | 0.674 | 0.02 | 0.842732 | 0.71019654 | 21.72157 | 0.046901 | 21.25 |
| 300209 | 2017 | 0.586 | 0.02 | 0.842732 | 0.71019654 | 21.72157 | 0.046901 | 21.25 |
| 727    | 2017 | -0.33 | 0.02 | 0.842732 | 0.71019654 | 24.24303 | 0.003414 | 24.51 |
| 600406 | 2017 | 0.636 | 0.02 | 0.842732 | 0.71019654 | 24.55143 | 0.17513  | 56.96 |
| 300209 | 2017 | 0.144 | 0.02 | 0.842732 | 0.71019654 | 21.72157 | 0.046901 | 21.25 |
| 600268 | 2017 | 0.809 | 0.02 | 0.842732 | 0.71019654 | 23.01745 | 0.054815 | 54.55 |
| 600959 | 2017 | -0.66 | 0.02 | 0.842732 | 0.71019654 | 24.19534 | 0.050203 | 18.04 |
| 300447 | 2017 | 0.816 | 0.02 | 0.842732 | 0.71019654 | 21.29327 | 0.084641 | 49.5  |
| 600268 | 2017 | -0.07 | 0.02 | 0.842732 | 0.71019654 | 22.98511 | 0.054815 | 54.55 |
| 300284 | 2017 | 0.794 | 0.02 | 0.842732 | 0.71019654 | 22.66084 | 0.127373 | 21.78 |
| 727    | 2017 | 0.332 | 0.02 | 0.842732 | 0.71019654 | 24.24303 | 0.003414 | 24.51 |
| 2546   | 2017 | -0.12 | 0.02 | 0.842732 | 0.71019654 | 21.93704 | 0.037166 | 42.51 |
| 2546   | 2017 | -0.12 | 0.02 | 0.842732 | 0.71019654 | 21.93704 | 0.037166 | 42.51 |
| 300172 | 2017 | -0.32 | 0.02 | 0.842732 | 0.71019654 | 21.42558 | 0.099364 | 28.98 |
| 2546   | 2017 | 0.677 | 0.02 | 0.842732 | 0.71019654 | 21.93704 | 0.037166 | 42.51 |
| 600268 | 2017 | 0.809 | 0.02 | 0.842732 | 0.71019654 | 22.98511 | 0.054815 | 54.55 |
| 603066 | 2017 | -0.2  | 0.02 | 0.842732 | 0.71019654 | 20.88745 | 0.095032 | 45.98 |
| 2546   | 2017 | 0.829 | 0.02 | 0.842732 | 0.71019654 | 21.93704 | 0.037166 | 42.51 |
| 2546   | 2017 | -0.12 | 0.02 | 0.842732 | 0.71019654 | 21.93704 | 0.037166 | 42.51 |
| 600775 | 2017 | 0.421 | 0.02 | 0.842732 | 0.71019654 | 22.45766 | 0.043725 | 26.59 |
| 600406 | 2017 | 0.537 | 0.02 | 0.842732 | 0.71019654 | 24.55143 | 0.17513  | 56.96 |
| 2546   | 2017 | -0.12 | 0.02 | 0.842732 | 0.71019654 | 21.93704 | 0.037166 | 42.51 |
| 2546   | 2017 | -0.12 | 0.02 | 0.842732 | 0.71019654 | 21.93704 | 0.037166 | 42.51 |
| 727    | 2017 | 0.542 | 0.02 | 0.842732 | 0.71019654 | 24.24303 | 0.003414 | 24.51 |
| 600970 | 2017 | -0.52 | 0.02 | 0.842732 | 0.71019654 | 23.26932 | 0.123383 | 39.7  |
| 525    | 2017 | 0.865 | 0.02 | 0.842732 | 0.71019654 | 23.24335 | 0.162642 | 51.75 |
| 600406 | 2017 | 0.43  | 0.02 | 0.842732 | 0.71019654 | 24.55143 | 0.17513  | 56.96 |
| 2080   | 2017 | 0.208 | 0.02 | 0.842732 | 0.71019654 | 23.8341  | 0.088827 | 60.24 |
| 2182   | 2017 | 0.494 | 0.02 | 0.842732 | 0.71019654 | 22.03744 | 0.098719 | 32.03 |
| 600406 | 2017 | 0.467 | 0.02 | 0.842732 | 0.71019654 | 24.55143 | 0.17513  | 56.96 |
| 603900 | 2017 | -0.86 | 0.02 | 0.842732 | 0.71019654 | 21.76344 | 0.135376 | 30.69 |
| 600406 | 2017 | 0.47  | 0.02 | 0.842732 | 0.71019654 | 24.55143 | 0.17513  | 56.96 |
| 600406 | 2017 | -0.19 | 0.02 | 0.842732 | 0.71019654 | 24.55143 | 0.17513  | 56.96 |
| 2165   | 2017 | 0.711 | 0.02 | 0.842732 | 0.71019654 | 21.79887 | 0.029964 | 28    |
| 300284 | 2017 | 0.794 | 0.02 | 0.842732 | 0.71019654 | 22.66084 | 0.127373 | 21.78 |
| 2315   | 2017 | 1.402 | 0.02 | 0.842732 | 0.71019654 | 21.66377 | 0.036829 | 55.64 |
| 600268 | 2017 | 0.809 | 0.02 | 0.842732 | 0.71019654 | 22.98511 | 0.054815 | 54.55 |
| 2747   | 2017 | 0.961 | 0.02 | 0.842732 | 0.71019654 | 21.89552 | 0.062491 | 35.52 |
| 300356 | 2017 | -0.14 | 0.02 | 0.842732 | 0.71019654 | 21.32978 | -0.38052 | 25.67 |
| 603018 | 2017 | 0.789 | 0.02 | 0.842732 | 0.71019654 | 22.38518 | 0.138242 | 7.84  |
| 600501 | 2017 | -0.4  | 0.02 | 0.842732 | 0.71019654 | 22.27516 | 0.013825 | 25.2  |
| 2080   | 2017 | 0.113 | 0.02 | 0.842732 | 0.71019654 | 23.8341  | 0.088827 | 60.24 |
| 600406 | 2017 | 0.84  | 0.02 | 0.842732 | 0.71019654 | 24.55143 | 0.17513  | 56.96 |
| 603018 | 2017 | -0.03 | 0.02 | 0.842732 | 0.71019654 | 22.38518 | 0.138242 | 7.84  |
| 300284 | 2017 | -0.53 | 0.02 | 0.842732 | 0.71019654 | 22.66084 | 0.127373 | 21.78 |
| 2024   | 2017 | 0.071 | 0.02 | 0.842732 | 0.71019654 | 25.74206 | 0.048423 | 20.96 |
| 300575 | 2017 | 0.72  | 0.02 | 0.842732 | 0.71019654 | 21.26632 | 0.116377 | 30.1  |
| 2024   | 2017 | 0.071 | 0.02 | 0.842732 | 0.71019654 | 25.74206 | 0.048423 | 20.96 |



|        |      |       |      |          |            |          |          |       |
|--------|------|-------|------|----------|------------|----------|----------|-------|
| 2182   | 2017 | 0.494 | 0.02 | 0.842732 | 0.71019654 | 22.03744 | 0.098719 | 32.03 |
| 2315   | 2017 | 0.862 | 0.02 | 0.842732 | 0.71019654 | 21.66377 | 0.036829 | 55.64 |
| 300172 | 2017 | 0.87  | 0.02 | 0.842732 | 0.71019654 | 21.42558 | 0.099364 | 28.98 |
| 603900 | 2017 | -0.97 | 0.02 | 0.842732 | 0.71019654 | 21.76386 | 0.135376 | 30.69 |
| 300172 | 2017 | 0.583 | 0.02 | 0.842732 | 0.71019654 | 21.42558 | 0.099364 | 28.98 |
| 300172 | 2017 | 0.87  | 0.02 | 0.842732 | 0.71019654 | 21.42558 | 0.099364 | 28.98 |
| 2090   | 2017 | 0.665 | 0.02 | 0.842732 | 0.71019654 | 22.10228 | 0.113189 | 37.15 |
| 603018 | 2017 | -0.44 | 0.02 | 0.842732 | 0.71019654 | 22.38518 | 0.138242 | 7.84  |
| 2080   | 2017 | -0.33 | 0.02 | 0.842732 | 0.71019654 | 23.8341  | 0.088827 | 60.24 |
| 300402 | 2017 | 0.106 | 0.02 | 0.842732 | 0.71019654 | 20.97644 | 0.017398 | 57.52 |
| 600268 | 2017 | 0.036 | 0.02 | 0.842732 | 0.71019654 | 22.98511 | 0.054815 | 54.55 |
| 600970 | 2017 | 0.011 | 0.02 | 0.842732 | 0.71019654 | 23.26932 | 0.123383 | 39.7  |
| 600268 | 2017 | 0.085 | 0.02 | 0.842732 | 0.71019654 | 22.98511 | 0.054815 | 54.55 |
| 600970 | 2017 | 0.805 | 0.02 | 0.842732 | 0.71019654 | 23.26932 | 0.123383 | 39.7  |
| 600406 | 2017 | 1.073 | 0.02 | 0.842732 | 0.71019654 | 24.55143 | 0.17513  | 56.96 |
| 600406 | 2017 | 1.133 | 0.02 | 0.842732 | 0.71019654 | 24.55143 | 0.17513  | 56.96 |
| 2546   | 2017 | -0.12 | 0.02 | 0.842732 | 0.71019654 | 21.93704 | 0.037166 | 42.51 |
| 300209 | 2017 | 0.144 | 0.02 | 0.842732 | 0.71019654 | 21.72157 | 0.046901 | 21.25 |
| 603900 | 2017 | 0.35  | 0.02 | 0.842732 | 0.71019654 | 21.76344 | 0.135376 | 30.69 |
| 2080   | 2017 | -0.55 | 0.02 | 0.842732 | 0.71019654 | 23.8341  | 0.088827 | 60.24 |
| 600970 | 2017 | -0.52 | 0.02 | 0.842732 | 0.71019654 | 23.26932 | 0.123383 | 39.7  |
| 919    | 2017 | 0.413 | 0.02 | 0.842732 | 0.71019654 | 22.07315 | 0.056627 | 45.23 |
| 300356 | 2017 | 0.123 | 0.02 | 0.842732 | 0.71019654 | 21.32978 | -0.38052 | 25.67 |
| 600970 | 2017 | 0.143 | 0.02 | 0.842732 | 0.71019654 | 23.26932 | 0.123383 | 39.7  |
| 600501 | 2017 | -0.01 | 0.02 | 0.842732 | 0.71019654 | 22.27516 | 0.013825 | 25.2  |
| 727    | 2017 | 0.332 | 0.02 | 0.842732 | 0.71019654 | 24.24303 | 0.003414 | 24.51 |
| 600970 | 2017 | -0.36 | 0.02 | 0.842732 | 0.71019654 | 23.26932 | 0.123383 | 39.7  |
| 300284 | 2017 | -0.12 | 0.02 | 0.842732 | 0.71019654 | 22.66084 | 0.127373 | 21.78 |
| 600970 | 2017 | 0.164 | 0.02 | 0.842732 | 0.71019654 | 23.26932 | 0.123383 | 39.7  |
| 600268 | 2017 | 0.322 | 0.02 | 0.842732 | 0.71019654 | 22.98511 | 0.054815 | 54.55 |
| 600268 | 2017 | -0.07 | 0.02 | 0.842732 | 0.71019654 | 22.98511 | 0.054815 | 54.55 |
| 603111 | 2017 | -0.37 | 0.02 | 0.842732 | 0.71019654 | 22.71218 | 0.07275  | 9.5   |
| 300447 | 2017 | 0.593 | 0.02 | 0.842732 | 0.71019654 | 21.29327 | 0.084641 | 49.5  |
| 300172 | 2017 | 0.92  | 0.02 | 0.842732 | 0.71019654 | 21.42558 | 0.099364 | 28.98 |
| 300585 | 2017 | 0.517 | 0.02 | 0.842732 | 0.71019654 | 20.26983 | 0.13145  | 36.35 |
| 300575 | 2017 | 0.72  | 0.02 | 0.842732 | 0.71019654 | 21.15119 | 0.116377 | 30.1  |
| 525    | 2017 | 0.645 | 0.02 | 0.842732 | 0.71019654 | 23.24335 | 0.162642 | 51.75 |
| 603518 | 2017 | -0.54 | 0.02 | 0.842732 | 0.71019654 | 22.61285 | 0.119823 | 31.73 |
| 2080   | 2017 | 0.298 | 0.02 | 0.842732 | 0.71019654 | 23.8341  | 0.088827 | 60.24 |
| 300575 | 2017 | 0.72  | 0.02 | 0.842732 | 0.71019654 | 21.26632 | 0.116377 | 30.1  |
| 300284 | 2017 | 0.794 | 0.02 | 0.842732 | 0.71019654 | 22.66084 | 0.127373 | 21.78 |
| 2165   | 2017 | 0.711 | 0.02 | 0.842732 | 0.71019654 | 21.37523 | 0.029964 | 28    |
| 603518 | 2017 | -0.54 | 0.02 | 0.842732 | 0.71019654 | 22.50159 | 0.119823 | 31.73 |
| 727    | 2017 | 0.507 | 0.02 | 0.842732 | 0.71019654 | 24.24303 | 0.003414 | 24.51 |
| 2315   | 2017 | 1.402 | 0.02 | 0.842732 | 0.71019654 | 21.66377 | 0.036829 | 55.64 |
| 600501 | 2017 | -0.04 | 0.02 | 0.842732 | 0.71019654 | 22.27516 | 0.013825 | 25.2  |
| 600562 | 2017 | 0.605 | 0.02 | 0.842732 | 0.71019654 | 21.71199 | 0.094682 | 26.48 |
| 300284 | 2017 | 0.062 | 0.02 | 0.842732 | 0.71019654 | 22.66084 | 0.127373 | 21.78 |
| 2090   | 2017 | 1.024 | 0.02 | 0.842732 | 0.71019654 | 22.10228 | 0.113189 | 37.15 |
| 600959 | 2017 | -0.66 | 0.02 | 0.842732 | 0.71019654 | 24.19534 | 0.050203 | 18.04 |
| 600406 | 2017 | -0.04 | 0.02 | 0.842732 | 0.71019654 | 24.55143 | 0.17513  | 56.96 |
| 2546   | 2017 | -0.12 | 0.02 | 0.842732 | 0.71019654 | 21.93704 | 0.037166 | 42.51 |
| 727    | 2017 | -0.33 | 0.02 | 0.842732 | 0.71019654 | 24.24303 | 0.003414 | 24.51 |
| 600959 | 2017 | -0.88 | 0.02 | 0.842732 | 0.71019654 | 24.19534 | 0.050203 | 18.04 |

|        |      |       |      |          |            |          |          |       |
|--------|------|-------|------|----------|------------|----------|----------|-------|
| 525    | 2017 | 0.78  | 0.02 | 0.842732 | 0.71019654 | 23.24335 | 0.162642 | 51.75 |
| 600889 | 2017 | -0.98 | 0.02 | 0.842732 | 0.71019654 | 21.33595 | -0.26323 | 33.02 |
| 600970 | 2017 | -0.52 | 0.02 | 0.842732 | 0.71019654 | 23.26932 | 0.123383 | 39.7  |
| 300284 | 2017 | -0.17 | 0.02 | 0.842732 | 0.71019654 | 22.66084 | 0.127373 | 21.78 |
| 600562 | 2017 | 0.008 | 0.02 | 0.842732 | 0.71019654 | 21.71199 | 0.094682 | 26.48 |
| 300356 | 2017 | 0.521 | 0.02 | 0.842732 | 0.71019654 | 21.32978 | -0.38052 | 25.67 |
| 525    | 2017 | 0.865 | 0.02 | 0.842732 | 0.71019654 | 23.24335 | 0.162642 | 51.75 |
| 300284 | 2017 | 0.205 | 0.02 | 0.842732 | 0.71019654 | 22.66084 | 0.127373 | 21.78 |
| 603528 | 2017 | 0.761 | 0.02 | 0.842732 | 0.71019654 | 21.42693 | 0.073913 | 63.33 |
| 600268 | 2017 | 0.809 | 0.02 | 0.842732 | 0.71019654 | 22.98511 | 0.054815 | 54.55 |
| 300356 | 2017 | 0.388 | 0.02 | 0.842732 | 0.71019654 | 21.32978 | -0.38052 | 25.67 |
| 600406 | 2017 | 1.133 | 0.02 | 0.842732 | 0.71019654 | 24.55143 | 0.17513  | 56.96 |
| 300422 | 2017 | 0.498 | 0.05 | 0.03036  | 0.00092176 | 21.86996 | 0.111991 | 21.26 |
| 601996 | 2017 | -0.21 | 0.05 | 0.03036  | 0.00092176 | 21.56278 | 0.063378 | 47.9  |
| 2329   | 2017 | -0.15 | 0.05 | 0.03036  | 0.00092176 | 22.4487  | 0.024175 | 31.4  |
| 600236 | 2017 | -0.1  | 0.05 | 0.03036  | 0.00092176 | 24.44357 | 0.16682  | 51.55 |
| 601996 | 2017 | -0.28 | 0.05 | 0.03036  | 0.00092176 | 21.56278 | 0.063378 | 47.9  |
| 300422 | 2017 | -0.09 | 0.05 | 0.03036  | 0.00092176 | 22.08971 | 0.111991 | 21.26 |
| 2329   | 2017 | -0.15 | 0.05 | 0.03036  | 0.00092176 | 22.4487  | 0.024175 | 31.4  |
| 2592   | 2017 | -0.63 | 0.05 | 0.03036  | 0.00092176 | 21.66901 | 0.06321  | 33.45 |
| 300422 | 2017 | 0.498 | 0.05 | 0.03036  | 0.00092176 | 22.08971 | 0.111991 | 21.26 |
| 600236 | 2017 | 0.442 | 0.05 | 0.03036  | 0.00092176 | 24.44357 | 0.16682  | 51.55 |
| 911    | 2017 | -0.68 | 0.05 | 0.03036  | 0.00092176 | 22.70323 | -0.14011 | 42.2  |
| 600936 | 2017 | 0.098 | 0.05 | 0.03036  | 0.00092176 | 22.72224 | 0.055152 | 27.81 |
| 600936 | 2017 | 0.098 | 0.05 | 0.03036  | 0.00092176 | 22.72224 | 0.055152 | 27.81 |
| 300422 | 2017 | 0.36  | 0.05 | 0.03036  | 0.00092176 | 22.08971 | 0.111991 | 21.26 |
| 2329   | 2017 | -0.15 | 0.05 | 0.03036  | 0.00092176 | 22.4487  | 0.024175 | 31.4  |
| 601996 | 2017 | 0.403 | 0.05 | 0.03036  | 0.00092176 | 21.56278 | 0.063378 | 47.9  |
| 2696   | 2017 | 0.402 | 0.05 | 0.03036  | 0.00092176 | 21.99882 | 0.054349 | 35.69 |
| 600236 | 2017 | -0.29 | 0.05 | 0.03036  | 0.00092176 | 24.44357 | 0.16682  | 51.55 |
| 2329   | 2017 | -0.3  | 0.05 | 0.03036  | 0.00092176 | 22.4487  | 0.024175 | 31.4  |
| 2696   | 2017 | -0.92 | 0.05 | 0.03036  | 0.00092176 | 21.99882 | 0.054349 | 35.69 |
| 300422 | 2017 | -0.08 | 0.05 | 0.03036  | 0.00092176 | 22.08971 | 0.111991 | 21.26 |
| 300422 | 2017 | -0.15 | 0.05 | 0.03036  | 0.00092176 | 22.08971 | 0.111991 | 21.26 |
| 2696   | 2017 | 0.402 | 0.05 | 0.03036  | 0.00092176 | 21.67322 | 0.054349 | 35.69 |
| 2696   | 2017 | 0.402 | 0.05 | 0.03036  | 0.00092176 | 21.99882 | 0.054349 | 35.69 |
| 2329   | 2017 | -0.15 | 0.05 | 0.03036  | 0.00092176 | 22.4487  | 0.024175 | 31.4  |
| 2329   | 2017 | 0.074 | 0.05 | 0.03036  | 0.00092176 | 22.04756 | 0.024175 | 31.4  |
| 2329   | 2017 | -0.15 | 0.05 | 0.03036  | 0.00092176 | 22.4487  | 0.024175 | 31.4  |
| 300422 | 2017 | 0.498 | 0.05 | 0.03036  | 0.00092176 | 22.08971 | 0.111991 | 21.26 |
| 911    | 2017 | 0.647 | 0.05 | 0.03036  | 0.00092176 | 22.72323 | -0.14011 | 42.2  |
| 2592   | 2017 | 0.698 | 0.05 | 0.03036  | 0.00092176 | 21.67016 | 0.06321  | 33.45 |
| 600236 | 2017 | 0.037 | 0.05 | 0.03036  | 0.00092176 | 23.89128 | 0.16682  | 51.55 |
| 600936 | 2017 | 0.098 | 0.05 | 0.03036  | 0.00092176 | 22.72282 | 0.055152 | 27.81 |
| 2592   | 2017 | -0.04 | 0.05 | 0.03036  | 0.00092176 | 21.66901 | 0.06321  | 33.45 |
| 2329   | 2017 | -0.15 | 0.05 | 0.03036  | 0.00092176 | 22.4487  | 0.024175 | 31.4  |
| 600236 | 2017 | -0.29 | 0.05 | 0.03036  | 0.00092176 | 24.44357 | 0.16682  | 51.55 |
| 2329   | 2017 | -0.15 | 0.05 | 0.03036  | 0.00092176 | 22.4487  | 0.024175 | 31.4  |
| 2329   | 2017 | -0.15 | 0.05 | 0.03036  | 0.00092176 | 22.4487  | 0.024175 | 31.4  |
| 2696   | 2017 | 0.402 | 0.05 | 0.03036  | 0.00092176 | 21.99882 | 0.054349 | 35.69 |
| 2329   | 2017 | -0.59 | 0.05 | 0.03036  | 0.00092176 | 22.4487  | 0.024175 | 31.4  |
| 300422 | 2017 | 0.498 | 0.05 | 0.03036  | 0.00092176 | 22.08971 | 0.111991 | 21.26 |
| 600236 | 2017 | -0.29 | 0.05 | 0.03036  | 0.00092176 | 24.44357 | 0.16682  | 51.55 |
| 2696   | 2017 | -0.92 | 0.05 | 0.03036  | 0.00092176 | 21.99882 | 0.054349 | 35.69 |

|        |      |       |      |          |            |          |          |       |
|--------|------|-------|------|----------|------------|----------|----------|-------|
| 601996 | 2017 | -0.46 | 0.05 | 0.03036  | 0.00092176 | 21.56278 | 0.063378 | 47.9  |
| 2592   | 2017 | -0.04 | 0.05 | 0.03036  | 0.00092176 | 21.66901 | 0.06321  | 33.45 |
| 600236 | 2017 | 0.442 | 0.05 | 0.03036  | 0.00092176 | 24.44357 | 0.16682  | 51.55 |
| 911    | 2017 | 0.647 | 0.05 | 0.03036  | 0.00092176 | 22.70323 | -0.14011 | 42.2  |
| 601996 | 2017 | 0.403 | 0.05 | 0.03036  | 0.00092176 | 21.56278 | 0.063378 | 47.9  |
| 911    | 2017 | -0.68 | 0.05 | 0.03036  | 0.00092176 | 22.70323 | -0.14011 | 42.2  |
| 2592   | 2017 | -0.04 | 0.05 | 0.03036  | 0.00092176 | 21.66901 | 0.06321  | 33.45 |
| 601996 | 2017 | -0.48 | 0.05 | 0.03036  | 0.00092176 | 21.51992 | 0.063378 | 47.9  |
| 2696   | 2017 | 0.402 | 0.05 | 0.03036  | 0.00092176 | 21.99882 | 0.054349 | 35.69 |
| 600236 | 2017 | -0.29 | 0.05 | 0.03036  | 0.00092176 | 24.44357 | 0.16682  | 51.55 |
| 2696   | 2017 | -0.04 | 0.05 | 0.03036  | 0.00092176 | 21.99882 | 0.054349 | 35.69 |
| 2592   | 2017 | -0.04 | 0.05 | 0.03036  | 0.00092176 | 21.66901 | 0.06321  | 33.45 |
| 911    | 2017 | -0.38 | 0.05 | 0.03036  | 0.00092176 | 22.70323 | -0.14011 | 42.2  |
| 600236 | 2017 | -0.1  | 0.05 | 0.03036  | 0.00092176 | 24.44357 | 0.16682  | 51.55 |
| 600236 | 2017 | 0.012 | 0.05 | 0.03036  | 0.00092176 | 24.44357 | 0.16682  | 51.55 |
| 600236 | 2017 | -0.29 | 0.05 | 0.03036  | 0.00092176 | 24.44357 | 0.16682  | 51.55 |
| 2329   | 2017 | -0.37 | 0.05 | 0.03036  | 0.00092176 | 22.4487  | 0.024175 | 31.4  |
| 600236 | 2017 | -0.29 | 0.05 | 0.03036  | 0.00092176 | 24.44357 | 0.16682  | 51.55 |
| 911    | 2017 | -0.68 | 0.05 | 0.03036  | 0.00092176 | 22.70323 | -0.14011 | 42.2  |
| 600236 | 2017 | -0.29 | 0.05 | 0.03036  | 0.00092176 | 24.44357 | 0.16682  | 51.55 |
| 300174 | 2017 | 0.499 | 0.03 | 1.485555 | 2.2068734  | 21.02368 | 0.096291 | 24.79 |
| 600483 | 2017 | -0.69 | 0.03 | 1.485555 | 2.2068734  | 23.70718 | 0.07641  | 62.5  |
| 600483 | 2017 | -0.69 | 0.03 | 1.485555 | 2.2068734  | 23.70718 | 0.07641  | 62.5  |
| 300174 | 2017 | 0.058 | 0.03 | 1.485555 | 2.2068734  | 21.02368 | 0.096291 | 24.79 |
| 2300   | 2017 | -0.63 | 0.03 | 1.485555 | 2.2068734  | 21.89887 | 0.079374 | 22.31 |
| 2299   | 2017 | -0.96 | 0.03 | 1.485555 | 2.2068734  | 23.30364 | 0.040628 | 45.71 |
| 2299   | 2017 | -0.96 | 0.03 | 1.485555 | 2.2068734  | 23.04739 | 0.040628 | 45.71 |
| 600483 | 2017 | 0.18  | 0.03 | 1.485555 | 2.2068734  | 23.70718 | 0.07641  | 62.5  |
| 300132 | 2017 | -0.01 | 0.03 | 1.485555 | 2.2068734  | 20.67345 | 0.130141 | 13.95 |
| 300132 | 2017 | -0.01 | 0.03 | 1.485555 | 2.2068734  | 20.67345 | 0.130141 | 13.95 |
| 300174 | 2017 | 0.389 | 0.03 | 1.485555 | 2.2068734  | 20.73666 | 0.096291 | 24.79 |
| 2299   | 2017 | -0.96 | 0.03 | 1.485555 | 2.2068734  | 23.30364 | 0.040628 | 45.71 |
| 2300   | 2017 | 0.699 | 0.03 | 1.485555 | 2.2068734  | 21.89887 | 0.079374 | 22.31 |
| 300174 | 2017 | 0.058 | 0.03 | 1.485555 | 2.2068734  | 21.02368 | 0.096291 | 24.79 |
| 2300   | 2017 | -0.53 | 0.03 | 1.485555 | 2.2068734  | 21.89887 | 0.079374 | 22.31 |
| 2300   | 2017 | 0.699 | 0.03 | 1.485555 | 2.2068734  | 21.89887 | 0.079374 | 22.31 |
| 600483 | 2017 | -0.69 | 0.03 | 1.485555 | 2.2068734  | 23.70718 | 0.07641  | 62.5  |
| 300174 | 2017 | 0.794 | 0.03 | 1.485555 | 2.2068734  | 21.02368 | 0.096291 | 24.79 |
| 2300   | 2017 | -0.63 | 0.03 | 1.485555 | 2.2068734  | 21.82072 | 0.079374 | 22.31 |
| 300174 | 2017 | 0.058 | 0.03 | 1.485555 | 2.2068734  | 21.02368 | 0.096291 | 24.79 |
| 300174 | 2017 | 0.058 | 0.03 | 1.485555 | 2.2068734  | 21.02368 | 0.096291 | 24.79 |
| 600483 | 2017 | -0.69 | 0.03 | 1.485555 | 2.2068734  | 23.70718 | 0.07641  | 62.5  |
| 2299   | 2017 | -0.96 | 0.03 | 1.485555 | 2.2068734  | 23.30364 | 0.040628 | 45.71 |
| 300174 | 2017 | 0.058 | 0.03 | 1.485555 | 2.2068734  | 21.02368 | 0.096291 | 24.79 |
| 2300   | 2017 | -0.63 | 0.03 | 1.485555 | 2.2068734  | 21.89887 | 0.079374 | 22.31 |
| 2299   | 2017 | -0.96 | 0.03 | 1.485555 | 2.2068734  | 23.30364 | 0.040628 | 45.71 |
| 600483 | 2017 | -0.69 | 0.03 | 1.485555 | 2.2068734  | 23.1149  | 0.07641  | 62.5  |
| 300174 | 2017 | 0.499 | 0.03 | 1.485555 | 2.2068734  | 21.02368 | 0.096291 | 24.79 |
| 600483 | 2017 | -0.69 | 0.03 | 1.485555 | 2.2068734  | 23.70718 | 0.07641  | 62.5  |
| 600483 | 2017 | -0.33 | 0.03 | 1.485555 | 2.2068734  | 23.70718 | 0.07641  | 62.5  |
| 2300   | 2017 | -0.63 | 0.03 | 1.485555 | 2.2068734  | 21.89887 | 0.079374 | 22.31 |
| 300132 | 2017 | -0.01 | 0.03 | 1.485555 | 2.2068734  | 20.66005 | 0.130141 | 13.95 |
| 600483 | 2017 | 0.18  | 0.03 | 1.485555 | 2.2068734  | 23.70718 | 0.07641  | 62.5  |
| 2299   | 2017 | -0.96 | 0.03 | 1.485555 | 2.2068734  | 23.30364 | 0.040628 | 45.71 |

|        |      |       |      |          |           |          |          |         |
|--------|------|-------|------|----------|-----------|----------|----------|---------|
| 600590 | 2017 | 0.175 | 0.03 | 1.920259 | 3.6873961 | 23.07597 | 0.066822 | 17.58   |
| 820    | 2017 | 0.501 | 0.03 | 1.920259 | 3.6873961 | 21.70815 | 0.178841 | 54.83   |
| 650    | 2017 | -0.85 | 0.03 | 1.920259 | 3.6873961 | 22.15056 | 0.127043 | 26.27   |
| 550    | 2017 | 0.178 | 0.03 | 1.920259 | 3.6873961 | 23.99602 | 0.054957 | 41.03   |
| 600363 | 2017 | 0.008 | 0.03 | 1.920259 | 3.6873961 | 22.17458 | 0.089857 | 21.73   |
| 650    | 2017 | -0.91 | 0.03 | 1.920259 | 3.6873961 | 22.15056 | 0.127043 | 26.27   |
| 2157   | 2017 | -0.43 | 0.03 | 1.920259 | 3.6873961 | 23.53362 | 0.08304  | 20.1    |
| 2157   | 2017 | -0.43 | 0.03 | 1.920259 | 3.6873961 | 23.53362 | 0.08304  | 20.1    |
| 600363 | 2017 | -0.65 | 0.03 | 1.920259 | 3.6873961 | 22.17458 | 0.089857 | 21.73   |
| 600590 | 2017 | 0.268 | 0.03 | 1.920259 | 3.6873961 | 23.07597 | 0.066822 | 17.58   |
| 600750 | 2017 | -0.64 | 0.03 | 1.920259 | 3.6873961 | 21.93643 | 0.143282 | 43.03   |
| 600750 | 2017 | -0.64 | 0.03 | 1.920259 | 3.6873961 | 21.93643 | 0.143282 | 43.03   |
| 990    | 2017 | -0.22 | 0.03 | 1.920259 | 3.6873961 | 23.76879 | 0.048912 | 33.44   |
| 2157   | 2017 | 0.52  | 0.03 | 1.920259 | 3.6873961 | 23.53362 | 0.08304  | 20.1    |
| 990    | 2017 | -0.68 | 0.03 | 1.920259 | 3.6873961 | 23.76879 | 0.048912 | 33.44   |
| 600590 | 2017 | 0.137 | 0.03 | 1.920259 | 3.6873961 | 23.07597 | 0.066822 | 17.58   |
| 2036   | 2017 | -0.62 | 0.03 | 1.920259 | 3.6873961 | 22.31329 | 0.14231  | 11.93   |
| 600590 | 2017 | 1.056 | 0.03 | 1.920259 | 3.6873961 | 23.07597 | 0.066822 | 17.58   |
| 600316 | 2017 | -0.54 | 0.03 | 1.920259 | 3.6873961 | 22.97961 | 0.006379 | 43.77   |
| 2036   | 2017 | -0.57 | 0.03 | 1.920259 | 3.6873961 | 22.31329 | 0.14231  | 11.93   |
| 550    | 2017 | -0.12 | 0.03 | 1.920259 | 3.6873961 | 23.99602 | 0.054957 | 41.03   |
| 2591   | 2017 | 0.062 | 0.03 | 1.920259 | 3.6873961 | 21.1336  | -0.00108 | 22.03   |
| 600269 | 2017 | -0.82 | 0.03 | 1.920259 | 3.6873961 | 24.25217 | 0.057596 | 51.98   |
| 2036   | 2017 | -0.22 | 0.03 | 1.920259 | 3.6873961 | 22.31329 | 0.14231  | 11.93   |
| 600750 | 2017 | -0.64 | 0.03 | 1.920259 | 3.6873961 | 21.9322  | 0.143282 | 43.03   |
| 990    | 2017 | 0.647 | 0.03 | 1.920259 | 3.6873961 | 23.76879 | 0.048912 | 33.44   |
| 2591   | 2017 | 0.062 | 0.03 | 1.920259 | 3.6873961 | 21.1336  | -0.00108 | 22.03   |
| 603977 | 2017 | -0.32 | 0.03 | 1.920259 | 3.6873961 | 21.00771 | 0.06873  | 41.09   |
| 2036   | 2017 | -0.18 | 0.03 | 1.920259 | 3.6873961 | 22.31329 | 0.14231  | 11.93   |
| 2036   | 2017 | -0.35 | 0.03 | 1.920259 | 3.6873961 | 22.31329 | 0.14231  | 11.93   |
| 600269 | 2017 | -0.94 | 0.03 | 1.920259 | 3.6873961 | 24.25217 | 0.057596 | 51.98   |
| 650    | 2017 | -0.91 | 0.03 | 1.920259 | 3.6873961 | 21.71362 | 0.127043 | 26.27   |
| 600590 | 2017 | 0.368 | 0.03 | 1.920259 | 3.6873961 | 23.07597 | 0.066822 | 17.58   |
| 990    | 2017 | -0.22 | 0.03 | 1.920259 | 3.6873961 | 23.56474 | 0.048912 | 33.44   |
| 600590 | 2017 | 0.397 | 0.03 | 1.920259 | 3.6873961 | 23.07597 | 0.066822 | 17.58   |
| 603977 | 2017 | -0.39 | 0.03 | 1.920259 | 3.6873961 | 20.56336 | 0.06873  | 41.09   |
| 600316 | 2017 | -0.48 | 0.03 | 1.920259 | 3.6873961 | 22.97961 | 0.006379 | 43.77   |
| 600590 | 2017 | 0.175 | 0.03 | 1.920259 | 3.6873961 | 23.07597 | 0.066822 | 17.58   |
| 600590 | 2017 | 1.296 | 0.03 | 1.920259 | 3.6873961 | 23.07597 | 0.066822 | 17.58   |
| 600590 | 2017 | -0.03 | 0.03 | 1.920259 | 3.6873961 | 23.07597 | 0.066822 | 17.58   |
| 600363 | 2017 | -0.37 | 0.03 | 1.920259 | 3.6873961 | 22.17458 | 0.089857 | 21.73   |
| 603977 | 2017 | -0.39 | 0.03 | 1.920259 | 3.6873961 | 21.00771 | 0.06873  | 41.09   |
| 2157   | 2017 | 0.023 | 0.03 | 1.920259 | 3.6873961 | 23.53362 | 0.08304  | 20.1    |
| 603977 | 2017 | 0.744 | 0.03 | 1.920259 | 3.6873961 | 21.00771 | 0.06873  | 41.09   |
| 600590 | 2017 | 0.484 | 0.03 | 1.920259 | 3.6873961 | 23.07597 | 0.066822 | 17.58   |
| 600461 | 2017 | -0.68 | 0.03 | 1.920259 | 3.6873961 | 22.85683 | 0.098146 | 29.4034 |
| 600269 | 2017 | -0.94 | 0.03 | 1.920259 | 3.6873961 | 24.25217 | 0.057596 | 51.98   |
| 2036   | 2017 | -0.62 | 0.03 | 1.920259 | 3.6873961 | 22.31329 | 0.14231  | 11.93   |
| 2157   | 2017 | -0.43 | 0.03 | 1.920259 | 3.6873961 | 23.53362 | 0.08304  | 20.1    |
| 600316 | 2017 | 0.786 | 0.03 | 1.920259 | 3.6873961 | 22.97961 | 0.006379 | 43.77   |
| 600363 | 2017 | -0.65 | 0.03 | 1.920259 | 3.6873961 | 22.17458 | 0.089857 | 21.73   |
| 990    | 2017 | -0.22 | 0.03 | 1.920259 | 3.6873961 | 23.76879 | 0.048912 | 33.44   |
| 2157   | 2017 | -0.43 | 0.03 | 1.920259 | 3.6873961 | 23.53362 | 0.08304  | 20.1    |
| 600461 | 2017 | -0.79 | 0.03 | 1.920259 | 3.6873961 | 22.85683 | 0.098146 | 29.4034 |

|        |      |       |      |          |           |          |          |         |
|--------|------|-------|------|----------|-----------|----------|----------|---------|
| 600590 | 2017 | -0.03 | 0.03 | 1.920259 | 3.6873961 | 23.07597 | 0.066822 | 17.58   |
| 600590 | 2017 | 0.729 | 0.03 | 1.920259 | 3.6873961 | 23.07597 | 0.066822 | 17.58   |
| 820    | 2017 | 0.501 | 0.03 | 1.920259 | 3.6873961 | 22.05719 | 0.178841 | 54.83   |
| 600590 | 2017 | 0.368 | 0.03 | 1.920259 | 3.6873961 | 23.07597 | 0.066822 | 17.58   |
| 2591   | 2017 | 0.062 | 0.03 | 1.920259 | 3.6873961 | 21.1336  | -0.00108 | 22.03   |
| 2036   | 2017 | -0.44 | 0.03 | 1.920259 | 3.6873961 | 22.31329 | 0.14231  | 11.93   |
| 600590 | 2017 | 0.175 | 0.03 | 1.920259 | 3.6873961 | 23.07597 | 0.066822 | 17.58   |
| 2157   | 2017 | -0.8  | 0.03 | 1.920259 | 3.6873961 | 23.53362 | 0.08304  | 20.1    |
| 600590 | 2017 | 0.175 | 0.03 | 1.920259 | 3.6873961 | 23.07597 | 0.066822 | 17.58   |
| 600590 | 2017 | 0.368 | 0.03 | 1.920259 | 3.6873961 | 23.07597 | 0.066822 | 17.58   |
| 600316 | 2017 | -0.54 | 0.03 | 1.920259 | 3.6873961 | 22.97208 | 0.006379 | 43.77   |
| 2036   | 2017 | -0.57 | 0.03 | 1.920259 | 3.6873961 | 22.02586 | 0.14231  | 11.93   |
| 600363 | 2017 | -0.65 | 0.03 | 1.920259 | 3.6873961 | 22.17458 | 0.089857 | 21.73   |
| 2591   | 2017 | 0.062 | 0.03 | 1.920259 | 3.6873961 | 21.1336  | -0.00108 | 22.03   |
| 603977 | 2017 | -0.51 | 0.03 | 1.920259 | 3.6873961 | 21.00771 | 0.06873  | 41.09   |
| 603977 | 2017 | -0.25 | 0.03 | 1.920259 | 3.6873961 | 21.00771 | 0.06873  | 41.09   |
| 2157   | 2017 | -0.43 | 0.03 | 1.920259 | 3.6873961 | 23.53362 | 0.08304  | 20.1    |
| 600363 | 2017 | -0.65 | 0.03 | 1.920259 | 3.6873961 | 22.17458 | 0.089857 | 21.73   |
| 600461 | 2017 | -0.79 | 0.03 | 1.920259 | 3.6873961 | 22.85683 | 0.098146 | 29.4034 |
| 650    | 2017 | -0.91 | 0.03 | 1.920259 | 3.6873961 | 22.15056 | 0.127043 | 26.27   |
| 600363 | 2017 | -0.18 | 0.03 | 1.920259 | 3.6873961 | 22.17458 | 0.089857 | 21.73   |
| 600363 | 2017 | -0.65 | 0.03 | 1.920259 | 3.6873961 | 22.17458 | 0.089857 | 21.73   |
| 2157   | 2017 | -0.11 | 0.03 | 1.920259 | 3.6873961 | 23.53362 | 0.08304  | 20.1    |
| 600363 | 2017 | -0.18 | 0.03 | 1.920259 | 3.6873961 | 22.17458 | 0.089857 | 21.73   |
| 650    | 2017 | -0.91 | 0.03 | 1.920259 | 3.6873961 | 21.71362 | 0.127043 | 26.27   |
| 603977 | 2017 | -0.39 | 0.03 | 1.920259 | 3.6873961 | 21.00771 | 0.06873  | 41.09   |
| 2036   | 2017 | -0.57 | 0.03 | 1.920259 | 3.6873961 | 22.31329 | 0.14231  | 11.93   |
| 600750 | 2017 | -0.64 | 0.03 | 1.920259 | 3.6873961 | 21.93643 | 0.143282 | 43.03   |
| 600363 | 2017 | -0.42 | 0.03 | 1.920259 | 3.6873961 | 22.17458 | 0.089857 | 21.73   |
| 600750 | 2017 | -0.64 | 0.03 | 1.920259 | 3.6873961 | 21.93643 | 0.143282 | 43.03   |
| 600363 | 2017 | -0.21 | 0.03 | 1.920259 | 3.6873961 | 22.17458 | 0.089857 | 21.73   |
| 300453 | 2017 | -0.59 | 0.03 | 1.920259 | 3.6873961 | 20.32359 | 0.072815 | 30.1    |
| 550    | 2017 | -0.12 | 0.03 | 1.920259 | 3.6873961 | 23.8744  | 0.054957 | 41.03   |
| 820    | 2017 | 0.501 | 0.03 | 1.920259 | 3.6873961 | 21.70815 | 0.178841 | 54.83   |
| 2591   | 2017 | 0.062 | 0.03 | 1.920259 | 3.6873961 | 21.1336  | -0.00108 | 22.03   |
| 2591   | 2017 | 0.062 | 0.03 | 1.920259 | 3.6873961 | 21.1336  | -0.00108 | 22.03   |
| 2157   | 2017 | -0.43 | 0.03 | 1.920259 | 3.6873961 | 23.53362 | 0.08304  | 20.1    |
| 600590 | 2017 | -0.03 | 0.03 | 1.920259 | 3.6873961 | 23.07597 | 0.066822 | 17.58   |
| 600590 | 2017 | 0.175 | 0.03 | 1.920259 | 3.6873961 | 23.07597 | 0.066822 | 17.58   |
| 2591   | 2017 | 0.062 | 0.03 | 1.920259 | 3.6873961 | 21.1336  | -0.00108 | 22.03   |
| 600363 | 2017 | -0.51 | 0.03 | 1.920259 | 3.6873961 | 22.17458 | 0.089857 | 21.73   |
| 600316 | 2017 | 0.786 | 0.03 | 1.920259 | 3.6873961 | 22.97961 | 0.006379 | 43.77   |
| 600590 | 2017 | -0.03 | 0.03 | 1.920259 | 3.6873961 | 23.07597 | 0.066822 | 17.58   |
| 603977 | 2017 | -0.53 | 0.03 | 1.920259 | 3.6873961 | 21.00771 | 0.06873  | 41.09   |
| 990    | 2017 | -0.38 | 0.03 | 1.920259 | 3.6873961 | 23.76879 | 0.048912 | 33.44   |
| 600750 | 2017 | 0.689 | 0.03 | 1.920259 | 3.6873961 | 21.93643 | 0.143282 | 43.03   |
| 2157   | 2017 | -0.43 | 0.03 | 1.920259 | 3.6873961 | 23.53362 | 0.08304  | 20.1    |
| 600750 | 2017 | 0.027 | 0.03 | 1.920259 | 3.6873961 | 21.93643 | 0.143282 | 43.03   |
| 600590 | 2017 | 1.296 | 0.03 | 1.920259 | 3.6873961 | 23.07597 | 0.066822 | 17.58   |
| 2157   | 2017 | 0.52  | 0.03 | 1.920259 | 3.6873961 | 23.53362 | 0.08304  | 20.1    |
| 990    | 2017 | -0.5  | 0.03 | 1.920259 | 3.6873961 | 23.76879 | 0.048912 | 33.44   |
| 990    | 2017 | -0.22 | 0.03 | 1.920259 | 3.6873961 | 23.76879 | 0.048912 | 33.44   |
| 600461 | 2017 | -0.69 | 0.03 | 1.920259 | 3.6873961 | 22.85683 | 0.098146 | 29.4034 |
| 2036   | 2017 | -0.4  | 0.03 | 1.920259 | 3.6873961 | 22.31329 | 0.14231  | 11.93   |

|        |      |       |      |          |            |          |          |         |
|--------|------|-------|------|----------|------------|----------|----------|---------|
| 300453 | 2017 | -0.59 | 0.03 | 1.920259 | 3.6873961  | 20.34119 | 0.072815 | 30.1    |
| 600363 | 2017 | -0.65 | 0.03 | 1.920259 | 3.6873961  | 22.17458 | 0.089857 | 21.73   |
| 603977 | 2017 | -0.39 | 0.03 | 1.920259 | 3.6873961  | 21.00771 | 0.06873  | 41.09   |
| 600590 | 2017 | 0.379 | 0.03 | 1.920259 | 3.6873961  | 23.07597 | 0.066822 | 17.58   |
| 603977 | 2017 | -0.58 | 0.03 | 1.920259 | 3.6873961  | 21.00771 | 0.06873  | 41.09   |
| 600363 | 2017 | -0.07 | 0.03 | 1.920259 | 3.6873961  | 22.17458 | 0.089857 | 21.73   |
| 2157   | 2017 | -0.43 | 0.03 | 1.920259 | 3.6873961  | 23.28109 | 0.08304  | 20.1    |
| 600363 | 2017 | -0.65 | 0.03 | 1.920259 | 3.6873961  | 22.17458 | 0.089857 | 21.73   |
| 600750 | 2017 | -0.64 | 0.03 | 1.920259 | 3.6873961  | 21.93643 | 0.143282 | 43.03   |
| 600750 | 2017 | 0.248 | 0.03 | 1.920259 | 3.6873961  | 21.93643 | 0.143282 | 43.03   |
| 600269 | 2017 | -0.8  | 0.03 | 1.920259 | 3.6873961  | 24.25217 | 0.057596 | 51.98   |
| 600590 | 2017 | 0.175 | 0.03 | 1.920259 | 3.6873961  | 22.78484 | 0.066822 | 17.58   |
| 600363 | 2017 | -0.18 | 0.03 | 1.920259 | 3.6873961  | 22.17458 | 0.089857 | 21.73   |
| 2591   | 2017 | 0.062 | 0.03 | 1.920259 | 3.6873961  | 21.04765 | -0.00108 | 22.03   |
| 650    | 2017 | 0.413 | 0.03 | 1.920259 | 3.6873961  | 21.71362 | 0.127043 | 26.27   |
| 990    | 2017 | -0.22 | 0.03 | 1.920259 | 3.6873961  | 23.76879 | 0.048912 | 33.44   |
| 600363 | 2017 | -0.18 | 0.03 | 1.920259 | 3.6873961  | 22.17458 | 0.089857 | 21.73   |
| 550    | 2017 | 0.178 | 0.03 | 1.920259 | 3.6873961  | 23.99602 | 0.054957 | 41.03   |
| 600269 | 2017 | -0.94 | 0.03 | 1.920259 | 3.6873961  | 24.25217 | 0.057596 | 51.98   |
| 600269 | 2017 | -0.5  | 0.03 | 1.920259 | 3.6873961  | 24.1522  | 0.057596 | 51.98   |
| 600363 | 2017 | -0.65 | 0.03 | 1.920259 | 3.6873961  | 22.17458 | 0.089857 | 21.73   |
| 550    | 2017 | -0.11 | 0.03 | 1.920259 | 3.6873961  | 23.99602 | 0.054957 | 41.03   |
| 600590 | 2017 | 0.367 | 0.03 | 1.920259 | 3.6873961  | 23.07597 | 0.066822 | 17.58   |
| 300453 | 2017 | -0.59 | 0.03 | 1.920259 | 3.6873961  | 20.32359 | 0.072815 | 30.1    |
| 600750 | 2017 | 0.5   | 0.03 | 1.920259 | 3.6873961  | 21.93643 | 0.143282 | 43.03   |
| 600363 | 2017 | -0.18 | 0.03 | 1.920259 | 3.6873961  | 21.7643  | 0.089857 | 21.73   |
| 600461 | 2017 | -0.79 | 0.03 | 1.920259 | 3.6873961  | 22.85683 | 0.098146 | 29.4034 |
| 2036   | 2017 | -0.57 | 0.03 | 1.920259 | 3.6873961  | 22.31329 | 0.14231  | 11.93   |
| 600461 | 2017 | -0.64 | 0.03 | 1.920259 | 3.6873961  | 22.29134 | 0.098146 | 29.4034 |
| 650    | 2017 | -0.85 | 0.03 | 1.920259 | 3.6873961  | 22.15056 | 0.127043 | 26.27   |
| 600522 | 2017 | 0.253 | 0.02 | 0.856289 | 0.73323067 | 24.01195 | 0.101185 | 25.05   |
| 2417   | 2017 | 0.172 | 0.02 | 0.856289 | 0.73323067 | 20.10336 | 0.021524 | 19.88   |
| 600522 | 2017 | 0.75  | 0.02 | 0.856289 | 0.73323067 | 24.01195 | 0.101185 | 25.05   |
| 600522 | 2017 | -0.05 | 0.02 | 0.856289 | 0.73323067 | 24.01195 | 0.101185 | 25.05   |
| 2074   | 2017 | -0.12 | 0.02 | 0.856289 | 0.73323067 | 23.56216 | 0.101776 | 24.84   |
| 2044   | 2017 | 0.142 | 0.02 | 0.856289 | 0.73323067 | 23.00145 | 0.090401 | 10.45   |
| 600522 | 2017 | -0.07 | 0.02 | 0.856289 | 0.73323067 | 24.01195 | 0.101185 | 25.05   |
| 600770 | 2017 | -0.37 | 0.02 | 0.856289 | 0.73323067 | 22.60031 | 0.028546 | 24.95   |
| 600862 | 2017 | 0.475 | 0.02 | 0.856289 | 0.73323067 | 22.6842  | 0.02379  | 42.86   |
| 2394   | 2017 | 0.57  | 0.02 | 0.856289 | 0.73323067 | 22.15531 | 0.115844 | 40.45   |
| 300091 | 2017 | -0.45 | 0.02 | 0.856289 | 0.73323067 | 21.97663 | 0.081437 | 17.4    |
| 601222 | 2017 | 0.181 | 0.02 | 0.856289 | 0.73323067 | 23.23117 | 0.07548  | 35.25   |
| 600770 | 2017 | 0.958 | 0.02 | 0.856289 | 0.73323067 | 22.60031 | 0.028546 | 24.95   |
| 600862 | 2017 | 0.501 | 0.02 | 0.856289 | 0.73323067 | 22.6842  | 0.02379  | 42.86   |
| 603968 | 2017 | 0.716 | 0.02 | 0.856289 | 0.73323067 | 21.24382 | 0.120634 | 9.98    |
| 600522 | 2017 | 0.432 | 0.02 | 0.856289 | 0.73323067 | 24.01195 | 0.101185 | 25.05   |
| 2484   | 2017 | 0.352 | 0.02 | 0.856289 | 0.73323067 | 22.0708  | 0.063161 | 31.84   |
| 2349   | 2017 | 0.042 | 0.02 | 0.856289 | 0.73323067 | 21.89933 | 0.071899 | 34.09   |
| 2074   | 2017 | 0.221 | 0.02 | 0.856289 | 0.73323067 | 23.56216 | 0.101776 | 24.84   |
| 2484   | 2017 | -0.48 | 0.02 | 0.856289 | 0.73323067 | 22.0708  | 0.063161 | 31.84   |
| 600770 | 2017 | 0.428 | 0.02 | 0.856289 | 0.73323067 | 22.05807 | 0.028546 | 24.95   |
| 600522 | 2017 | 0.75  | 0.02 | 0.856289 | 0.73323067 | 24.01195 | 0.101185 | 25.05   |
| 2349   | 2017 | 0.042 | 0.02 | 0.856289 | 0.73323067 | 21.89933 | 0.071899 | 34.09   |
| 300265 | 2017 | 0.069 | 0.02 | 0.856289 | 0.73323067 | 21.47037 | 0.045974 | 55.19   |

|        |      |       |      |          |            |          |          |       |
|--------|------|-------|------|----------|------------|----------|----------|-------|
| 2438   | 2017 | -0.05 | 0.02 | 0.856289 | 0.73323067 | 21.79002 | 0.036265 | 15.01 |
| 601222 | 2017 | -0.36 | 0.02 | 0.856289 | 0.73323067 | 23.54309 | 0.07548  | 35.25 |
| 2156   | 2017 | 0.824 | 0.02 | 0.856289 | 0.73323067 | 23.2203  | 0.031503 | 31.25 |
| 2417   | 2017 | 0.172 | 0.02 | 0.856289 | 0.73323067 | 20.10336 | 0.021524 | 19.88 |
| 300265 | 2017 | 0.1   | 0.02 | 0.856289 | 0.73323067 | 21.47037 | 0.045974 | 55.19 |
| 2722   | 2017 | 0.503 | 0.02 | 0.856289 | 0.73323067 | 21.65772 | 0.047921 | 31.08 |
| 603339 | 2017 | 0.051 | 0.02 | 0.856289 | 0.73323067 | 21.31903 | 0.117304 | 39.74 |
| 2074   | 2017 | 0.511 | 0.02 | 0.856289 | 0.73323067 | 23.56216 | 0.101776 | 24.84 |
| 2576   | 2017 | -0.08 | 0.02 | 0.856289 | 0.73323067 | 20.77364 | -0.00135 | 29.98 |
| 603036 | 2017 | 0.206 | 0.02 | 0.856289 | 0.73323067 | 20.79411 | 0.035978 | 14.79 |
| 2074   | 2017 | 0.993 | 0.02 | 0.856289 | 0.73323067 | 23.56216 | 0.101776 | 24.84 |
| 2293   | 2017 | -0.31 | 0.02 | 0.856289 | 0.73323067 | 22.14136 | 0.143708 | 17.73 |
| 600522 | 2017 | 0.485 | 0.02 | 0.856289 | 0.73323067 | 24.01195 | 0.101185 | 25.05 |
| 2349   | 2017 | 0.564 | 0.02 | 0.856289 | 0.73323067 | 21.55571 | 0.071899 | 34.09 |
| 600522 | 2017 | 0.11  | 0.02 | 0.856289 | 0.73323067 | 24.01195 | 0.101185 | 25.05 |
| 2484   | 2017 | -0.03 | 0.02 | 0.856289 | 0.73323067 | 22.0708  | 0.063161 | 31.84 |
| 601222 | 2017 | 0.181 | 0.02 | 0.856289 | 0.73323067 | 23.54309 | 0.07548  | 35.25 |
| 603339 | 2017 | 0.102 | 0.02 | 0.856289 | 0.73323067 | 21.31903 | 0.117304 | 39.74 |
| 2484   | 2017 | -0.13 | 0.02 | 0.856289 | 0.73323067 | 22.0708  | 0.063161 | 31.84 |
| 600522 | 2017 | -0.09 | 0.02 | 0.856289 | 0.73323067 | 24.01195 | 0.101185 | 25.05 |
| 2156   | 2017 | 0.624 | 0.02 | 0.856289 | 0.73323067 | 23.2203  | 0.031503 | 31.25 |
| 300091 | 2017 | -0.38 | 0.02 | 0.856289 | 0.73323067 | 21.97663 | 0.081437 | 17.4  |
| 603389 | 2017 | -0.25 | 0.02 | 0.856289 | 0.73323067 | 20.52756 | 0.069665 | 64.12 |
| 603313 | 2017 | 0.688 | 0.02 | 0.856289 | 0.73323067 | 21.55994 | 0.099317 | 61.96 |
| 2156   | 2017 | 0.657 | 0.02 | 0.856289 | 0.73323067 | 23.2203  | 0.031503 | 31.25 |
| 603313 | 2017 | -0.64 | 0.02 | 0.856289 | 0.73323067 | 21.55994 | 0.099317 | 61.96 |
| 603313 | 2017 | 0.688 | 0.02 | 0.856289 | 0.73323067 | 21.55994 | 0.099317 | 61.96 |
| 2722   | 2017 | -0.16 | 0.02 | 0.856289 | 0.73323067 | 21.28249 | 0.047921 | 31.08 |
| 603036 | 2017 | -0.46 | 0.02 | 0.856289 | 0.73323067 | 20.77434 | 0.035978 | 14.79 |
| 2239   | 2017 | -0.1  | 0.02 | 0.856289 | 0.73323067 | 22.88205 | 0.0706   | 16.25 |
| 600862 | 2017 | 0.501 | 0.02 | 0.856289 | 0.73323067 | 22.6842  | 0.02379  | 42.86 |
| 603036 | 2017 | -0.46 | 0.02 | 0.856289 | 0.73323067 | 20.79411 | 0.035978 | 14.79 |
| 2239   | 2017 | -0.4  | 0.02 | 0.856289 | 0.73323067 | 22.88205 | 0.0706   | 16.25 |
| 603968 | 2017 | 0.716 | 0.02 | 0.856289 | 0.73323067 | 21.24382 | 0.120634 | 9.98  |
| 601222 | 2017 | 0.002 | 0.02 | 0.856289 | 0.73323067 | 23.54309 | 0.07548  | 35.25 |
| 603313 | 2017 | -0.64 | 0.02 | 0.856289 | 0.73323067 | 21.55994 | 0.099317 | 61.96 |
| 2483   | 2017 | 1.026 | 0.02 | 0.856289 | 0.73323067 | 22.19519 | 0.045549 | 43.47 |
| 2293   | 2017 | 0.287 | 0.02 | 0.856289 | 0.73323067 | 22.24675 | 0.143708 | 17.73 |
| 600770 | 2017 | 0.958 | 0.02 | 0.856289 | 0.73323067 | 22.60031 | 0.028546 | 24.95 |
| 600862 | 2017 | 0.419 | 0.02 | 0.856289 | 0.73323067 | 22.6842  | 0.02379  | 42.86 |
| 600862 | 2017 | 0.501 | 0.02 | 0.856289 | 0.73323067 | 22.6842  | 0.02379  | 42.86 |
| 603313 | 2017 | 0.688 | 0.02 | 0.856289 | 0.73323067 | 21.55994 | 0.099317 | 61.96 |
| 603313 | 2017 | 0.688 | 0.02 | 0.856289 | 0.73323067 | 21.55994 | 0.099317 | 61.96 |
| 2349   | 2017 | 0.925 | 0.02 | 0.856289 | 0.73323067 | 21.89933 | 0.071899 | 34.09 |
| 300265 | 2017 | 0.1   | 0.02 | 0.856289 | 0.73323067 | 21.47037 | 0.045974 | 55.19 |
| 2576   | 2017 | 0.125 | 0.02 | 0.856289 | 0.73323067 | 20.77364 | -0.00135 | 29.98 |
| 600389 | 2017 | 0.716 | 0.02 | 0.856289 | 0.73323067 | 21.80594 | 0.159032 | 29.19 |
| 600770 | 2017 | 0.958 | 0.02 | 0.856289 | 0.73323067 | 22.60031 | 0.028546 | 24.95 |
| 2394   | 2017 | -0.75 | 0.02 | 0.856289 | 0.73323067 | 22.15531 | 0.115844 | 40.45 |
| 300421 | 2017 | 0.225 | 0.02 | 0.856289 | 0.73323067 | 21.14007 | 0.06317  | 26.98 |
| 603036 | 2017 | 0.868 | 0.02 | 0.856289 | 0.73323067 | 20.79411 | 0.035978 | 14.79 |
| 600522 | 2017 | 0.325 | 0.02 | 0.856289 | 0.73323067 | 23.65679 | 0.101185 | 25.05 |
| 2074   | 2017 | 0.331 | 0.02 | 0.856289 | 0.73323067 | 23.56216 | 0.101776 | 24.84 |
| 603389 | 2017 | -0.52 | 0.02 | 0.856289 | 0.73323067 | 20.79502 | 0.069665 | 64.12 |

|        |      |       |      |          |            |          |          |       |
|--------|------|-------|------|----------|------------|----------|----------|-------|
| 2074   | 2017 | 0.331 | 0.02 | 0.856289 | 0.73323067 | 23.56216 | 0.101776 | 24.84 |
| 600770 | 2017 | 0.958 | 0.02 | 0.856289 | 0.73323067 | 22.60031 | 0.028546 | 24.95 |
| 35     | 2017 | -0.19 | 0.02 | 0.856289 | 0.73323067 | 22.19268 | 0.073775 | 29.59 |
| 600770 | 2017 | 0.296 | 0.02 | 0.856289 | 0.73323067 | 22.60031 | 0.028546 | 24.95 |
| 603389 | 2017 | -0.69 | 0.02 | 0.856289 | 0.73323067 | 20.79502 | 0.069665 | 64.12 |
| 603389 | 2017 | -0.57 | 0.02 | 0.856289 | 0.73323067 | 20.79502 | 0.069665 | 64.12 |
| 2349   | 2017 | 0.704 | 0.02 | 0.856289 | 0.73323067 | 21.89933 | 0.071899 | 34.09 |
| 2293   | 2017 | -0.31 | 0.02 | 0.856289 | 0.73323067 | 22.24675 | 0.143708 | 17.73 |
| 300280 | 2017 | 0.428 | 0.02 | 0.856289 | 0.73323067 | 20.79061 | 0.007098 | 26.17 |
| 601222 | 2017 | -0.36 | 0.02 | 0.856289 | 0.73323067 | 23.54309 | 0.07548  | 35.25 |
| 601222 | 2017 | -0.36 | 0.02 | 0.856289 | 0.73323067 | 23.54309 | 0.07548  | 35.25 |
| 600862 | 2017 | 0.501 | 0.02 | 0.856289 | 0.73323067 | 21.96816 | 0.02379  | 42.86 |
| 300280 | 2017 | -0.08 | 0.02 | 0.856289 | 0.73323067 | 20.79061 | 0.007098 | 26.17 |
| 600522 | 2017 | 0.019 | 0.02 | 0.856289 | 0.73323067 | 24.01195 | 0.101185 | 25.05 |
| 300091 | 2017 | -0.45 | 0.02 | 0.856289 | 0.73323067 | 21.97663 | 0.081437 | 17.4  |
| 2349   | 2017 | 0.925 | 0.02 | 0.856289 | 0.73323067 | 21.89933 | 0.071899 | 34.09 |
| 600389 | 2017 | 0.716 | 0.02 | 0.856289 | 0.73323067 | 21.7822  | 0.159032 | 29.19 |
| 600862 | 2017 | 0.475 | 0.02 | 0.856289 | 0.73323067 | 22.6842  | 0.02379  | 42.86 |
| 2293   | 2017 | 0.287 | 0.02 | 0.856289 | 0.73323067 | 22.24675 | 0.143708 | 17.73 |
| 603036 | 2017 | 0.111 | 0.02 | 0.856289 | 0.73323067 | 20.79411 | 0.035978 | 14.79 |
| 2293   | 2017 | 0.564 | 0.02 | 0.856289 | 0.73323067 | 22.24675 | 0.143708 | 17.73 |
| 2417   | 2017 | 0.172 | 0.02 | 0.856289 | 0.73323067 | 20.10336 | 0.021524 | 19.88 |
| 603339 | 2017 | 0.051 | 0.02 | 0.856289 | 0.73323067 | 20.92449 | 0.117304 | 39.74 |
| 600862 | 2017 | 0.501 | 0.02 | 0.856289 | 0.73323067 | 22.6842  | 0.02379  | 42.86 |
| 600522 | 2017 | -0.31 | 0.02 | 0.856289 | 0.73323067 | 24.01195 | 0.101185 | 25.05 |
| 2438   | 2017 | -0.43 | 0.02 | 0.856289 | 0.73323067 | 21.67065 | 0.036265 | 15.01 |
| 603339 | 2017 | 0.068 | 0.02 | 0.856289 | 0.73323067 | 21.31903 | 0.117304 | 39.74 |
| 2483   | 2017 | 1.026 | 0.02 | 0.856289 | 0.73323067 | 22.19519 | 0.045549 | 43.47 |
| 600770 | 2017 | 0.075 | 0.02 | 0.856289 | 0.73323067 | 22.60031 | 0.028546 | 24.95 |
| 300265 | 2017 | 0.762 | 0.02 | 0.856289 | 0.73323067 | 21.47037 | 0.045974 | 55.19 |
| 2438   | 2017 | 0.233 | 0.02 | 0.856289 | 0.73323067 | 21.79002 | 0.036265 | 15.01 |
| 300091 | 2017 | -0.18 | 0.02 | 0.856289 | 0.73323067 | 21.97663 | 0.081437 | 17.4  |
| 2438   | 2017 | 0.453 | 0.02 | 0.856289 | 0.73323067 | 21.79002 | 0.036265 | 15.01 |
| 2156   | 2017 | 0.824 | 0.02 | 0.856289 | 0.73323067 | 23.2203  | 0.031503 | 31.25 |
| 600522 | 2017 | 0.529 | 0.02 | 0.856289 | 0.73323067 | 24.01195 | 0.101185 | 25.05 |
| 2293   | 2017 | -0.31 | 0.02 | 0.856289 | 0.73323067 | 22.24675 | 0.143708 | 17.73 |
| 2074   | 2017 | 0.331 | 0.02 | 0.856289 | 0.73323067 | 23.56216 | 0.101776 | 24.84 |
| 2349   | 2017 | 0.925 | 0.02 | 0.856289 | 0.73323067 | 21.89933 | 0.071899 | 34.09 |
| 300091 | 2017 | -0.18 | 0.02 | 0.856289 | 0.73323067 | 21.92844 | 0.081437 | 17.4  |
| 35     | 2017 | 0.14  | 0.02 | 0.856289 | 0.73323067 | 22.81886 | 0.073775 | 29.59 |
| 2074   | 2017 | 0.993 | 0.02 | 0.856289 | 0.73323067 | 23.56216 | 0.101776 | 24.84 |
| 603968 | 2017 | 0.716 | 0.02 | 0.856289 | 0.73323067 | 21.3167  | 0.120634 | 9.98  |
| 2484   | 2017 | -0.17 | 0.02 | 0.856289 | 0.73323067 | 22.0708  | 0.063161 | 31.84 |
| 601222 | 2017 | 0.349 | 0.02 | 0.856289 | 0.73323067 | 23.54309 | 0.07548  | 35.25 |
| 603339 | 2017 | 0.102 | 0.02 | 0.856289 | 0.73323067 | 21.31903 | 0.117304 | 39.74 |
| 603313 | 2017 | -0.03 | 0.02 | 0.856289 | 0.73323067 | 21.55994 | 0.099317 | 61.96 |
| 2484   | 2017 | -0.17 | 0.02 | 0.856289 | 0.73323067 | 21.9525  | 0.063161 | 31.84 |
| 300265 | 2017 | -0.3  | 0.02 | 0.856289 | 0.73323067 | 20.72238 | 0.045974 | 55.19 |
| 2201   | 2017 | 0.67  | 0.02 | 0.856289 | 0.73323067 | 21.66883 | -0.00409 | 46.85 |
| 2156   | 2017 | 0.824 | 0.02 | 0.856289 | 0.73323067 | 23.2203  | 0.031503 | 31.25 |
| 2576   | 2017 | -0.7  | 0.02 | 0.856289 | 7.33E-01   | 20.77364 | -0.00135 | 29.98 |
| 600770 | 2017 | 0.958 | 0.02 | 0.856289 | 7.33E-01   | 22.60031 | 0.028546 | 24.95 |
| 2239   | 2017 | -0.36 | 0.02 | 0.856289 | 7.33E-01   | 22.88205 | 0.0706   | 16.25 |
| 600522 | 2017 | -0.14 | 0.02 | 0.856289 | 7.33E-01   | 24.01195 | 0.101185 | 25.05 |



|        |      |       |      |          |            |          |          |       |
|--------|------|-------|------|----------|------------|----------|----------|-------|
| 2293   | 2017 | 0.564 | 0.02 | 0.856289 | 7.33E-01   | 22.24675 | 0.143708 | 17.73 |
| 600862 | 2017 | 0.501 | 0.02 | 0.856289 | 7.33E-01   | 22.6842  | 0.02379  | 42.86 |
| 601222 | 2017 | -0.62 | 0.02 | 0.856289 | 7.33E-01   | 23.54309 | 0.07548  | 35.25 |
| 2483   | 2017 | 1.026 | 0.02 | 0.856289 | 7.33E-01   | 22.19519 | 0.045549 | 43.47 |
| 300280 | 2017 | 0.428 | 0.02 | 0.856289 | 7.33E-01   | 20.79061 | 0.007098 | 26.17 |
| 600522 | 2017 | -0.58 | 0.02 | 0.856289 | 7.33E-01   | 24.01195 | 0.101185 | 25.05 |
| 2417   | 2017 | 0.172 | 0.02 | 0.856289 | 7.33E-01   | 20.15227 | 0.021524 | 19.88 |
| 600389 | 2017 | 0.716 | 0.02 | 0.856289 | 7.33E-01   | 21.80594 | 0.159032 | 29.19 |
| 603968 | 2017 | 0.716 | 0.02 | 0.856289 | 7.33E-01   | 21.24382 | 0.120634 | 9.98  |
| 2156   | 2017 | -0.5  | 0.02 | 0.856289 | 7.33E-01   | 23.2203  | 0.031503 | 31.25 |
| 300091 | 2017 | -0.18 | 0.02 | 0.856289 | 7.33E-01   | 21.97663 | 0.081437 | 17.4  |
| 2483   | 2017 | 0.555 | 0.02 | 0.856289 | 7.33E-01   | 22.19519 | 0.045549 | 43.47 |
| 2239   | 2017 | -0.28 | 0.02 | 0.856289 | 7.33E-01   | 22.88205 | 0.0706   | 16.25 |
| 2484   | 2017 | -0.48 | 0.02 | 0.856289 | 7.33E-01   | 22.0708  | 0.063161 | 31.84 |
| 2239   | 2017 | -0.1  | 0.02 | 0.856289 | 7.33E-01   | 22.88205 | 0.0706   | 16.25 |
| 2293   | 2017 | -0.31 | 0.02 | 0.856289 | 7.33E-01   | 22.24675 | 0.143708 | 17.73 |
| 2239   | 2017 | 0.567 | 0.02 | 0.856289 | 7.33E-01   | 22.17819 | 0.0706   | 16.25 |
| 600522 | 2017 | 0.086 | 0.02 | 0.856289 | 7.33E-01   | 24.01195 | 0.101185 | 25.05 |
| 2349   | 2017 | 0.925 | 0.02 | 0.856289 | 7.33E-01   | 21.89933 | 0.071899 | 34.09 |
| 2394   | 2017 | 0.57  | 0.02 | 0.856289 | 7.33E-01   | 22.15531 | 0.115844 | 40.45 |
| 600522 | 2017 | 0.087 | 0.02 | 0.856289 | 7.33E-01   | 24.01195 | 0.101185 | 25.05 |
| 2722   | 2017 | 0.503 | 0.02 | 0.856289 | 7.33E-01   | 21.65772 | 0.047921 | 31.08 |
| 2576   | 2017 | 0.125 | 0.02 | 0.856289 | 7.33E-01   | 20.77364 | -0.00135 | 29.98 |
| 2417   | 2017 | 0.172 | 0.02 | 0.856289 | 7.33E-01   | 20.10336 | 0.021524 | 19.88 |
| 2576   | 2017 | -0.04 | 0.02 | 0.856289 | 7.33E-01   | 20.77364 | -0.00135 | 29.98 |
| 2394   | 2017 | -0.24 | 0.02 | 0.856289 | 7.33E-01   | 21.93609 | 0.115844 | 40.45 |
| 2576   | 2017 | -0.7  | 0.02 | 0.856289 | 7.33E-01   | 20.77364 | -0.00135 | 29.98 |
| 2722   | 2017 | 0.006 | 0.02 | 0.856289 | 7.33E-01   | 21.65772 | 0.047921 | 31.08 |
| 601222 | 2017 | -0.36 | 0.02 | 0.856289 | 7.33E-01   | 23.54309 | 0.07548  | 35.25 |
| 300265 | 2017 | 0.321 | 0.02 | 0.856289 | 7.33E-01   | 21.47037 | 0.045974 | 55.19 |
| 2576   | 2017 | 0.125 | 0.02 | 0.856289 | 7.33E-01   | 20.77364 | -0.00135 | 29.98 |
| 2239   | 2017 | -0.76 | 0.02 | 0.856289 | 7.33E-01   | 22.88205 | 0.0706   | 16.25 |
| 300280 | 2017 | -0.08 | 0.02 | 0.856289 | 7.33E-01   | 20.79457 | 0.007098 | 26.17 |
| 600862 | 2017 | 0.353 | 0.02 | 0.856289 | 7.33E-01   | 22.6842  | 0.02379  | 42.86 |
| 2201   | 2017 | 0.67  | 0.02 | 0.856289 | 7.33E-01   | 21.73156 | -0.00409 | 46.85 |
| 600522 | 2017 | 0.75  | 0.02 | 0.856289 | 7.33E-01   | 24.01195 | 0.101185 | 25.05 |
| 2394   | 2017 | 0.57  | 0.02 | 0.856289 | 7.33E-01   | 22.15531 | 0.115844 | 40.45 |
| 2074   | 2017 | 0.993 | 0.02 | 0.856289 | 7.33E-01   | 23.56216 | 0.101776 | 24.84 |
| 601222 | 2017 | -0.43 | 0.02 | 0.856289 | 7.33E-01   | 23.54309 | 0.07548  | 35.25 |
| 601222 | 2017 | -0.16 | 0.02 | 0.856289 | 7.33E-01   | 23.54309 | 0.07548  | 35.25 |
| 2074   | 2017 | 0.082 | 0.02 | 0.856289 | 7.33E-01   | 23.56216 | 0.101776 | 24.84 |
| 600389 | 2017 | 0.716 | 0.02 | 0.856289 | 7.33E-01   | 21.80594 | 0.159032 | 29.19 |
| 603389 | 2017 | -0.69 | 0.02 | 0.856289 | 7.33E-01   | 20.79502 | 0.069665 | 64.12 |
| 2349   | 2017 | 0.594 | 0.02 | 0.856289 | 7.33E-01   | 21.89933 | 0.071899 | 34.09 |
| 2576   | 2017 | -0.01 | 0.02 | 0.856289 | 7.33E-01   | 20.59419 | -0.00135 | 29.98 |
| 603313 | 2017 | 0.688 | 0.02 | 0.856289 | 0.73323067 | 21.47349 | 0.099317 | 61.96 |
| 2201   | 2017 | -0.47 | 0.02 | 0.856289 | 0.73323067 | 21.73156 | -0.00409 | 46.85 |
| 2201   | 2017 | -0.02 | 0.02 | 0.856289 | 0.73323067 | 21.73156 | -0.00409 | 46.85 |
| 300091 | 2017 | -0.18 | 0.02 | 0.856289 | 0.73323067 | 21.97663 | 0.081437 | 17.4  |
| 2394   | 2017 | 0.128 | 0.02 | 0.856289 | 0.73323067 | 22.15531 | 0.115844 | 40.45 |
| 300265 | 2017 | 0.098 | 0.02 | 0.856289 | 0.73323067 | 21.47037 | 0.045974 | 55.19 |
| 600389 | 2017 | -0.13 | 0.02 | 0.856289 | 0.73323067 | 21.80594 | 0.159032 | 29.19 |
| 2438   | 2017 | 0.233 | 0.02 | 0.856289 | 0.73323067 | 21.79002 | 0.036265 | 15.01 |
| 2074   | 2017 | 0.221 | 0.02 | 0.856289 | 0.73323067 | 23.56216 | 0.101776 | 24.84 |

|        |      |       |      |          |            |          |          |       |
|--------|------|-------|------|----------|------------|----------|----------|-------|
| 600522 | 2017 | 0.121 | 0.02 | 0.856289 | 0.73323067 | 24.01195 | 0.101185 | 25.05 |
| 35     | 2017 | -0.33 | 0.02 | 0.856289 | 0.73323067 | 22.81886 | 0.073775 | 29.59 |
| 2722   | 2017 | -0.11 | 0.02 | 0.856289 | 0.73323067 | 21.65772 | 0.047921 | 31.08 |
| 300421 | 2017 | 0.225 | 0.02 | 0.856289 | 0.73323067 | 21.09008 | 0.06317  | 26.98 |
| 300091 | 2017 | -0.38 | 0.02 | 0.856289 | 0.73323067 | 21.97663 | 0.081437 | 17.4  |
| 2239   | 2017 | -0.76 | 0.02 | 0.856289 | 0.73323067 | 22.88205 | 0.0706   | 16.25 |
| 2484   | 2017 | 0.849 | 0.02 | 0.856289 | 0.73323067 | 22.0708  | 0.063161 | 31.84 |
| 2156   | 2017 | 0.009 | 0.02 | 0.856289 | 0.73323067 | 23.2203  | 0.031503 | 31.25 |
| 2349   | 2017 | 0.925 | 0.02 | 0.856289 | 0.73323067 | 21.89933 | 0.071899 | 34.09 |
| 2074   | 2017 | 0.082 | 0.02 | 0.856289 | 0.73323067 | 23.56216 | 0.101776 | 24.84 |
| 35     | 2017 | -0.43 | 0.02 | 0.856289 | 0.73323067 | 22.81886 | 0.073775 | 29.59 |
| 2239   | 2017 | -0.56 | 0.02 | 0.856289 | 0.73323067 | 22.88205 | 0.0706   | 16.25 |
| 2074   | 2017 | -0.11 | 0.02 | 0.856289 | 0.73323067 | 23.56216 | 0.101776 | 24.84 |
| 2349   | 2017 | 0.925 | 0.02 | 0.856289 | 0.73323067 | 21.89933 | 0.071899 | 34.09 |
| 600522 | 2017 | -0.33 | 0.02 | 0.856289 | 0.73323067 | 24.01195 | 0.101185 | 25.05 |
| 600522 | 2017 | 0.113 | 0.02 | 0.856289 | 0.73323067 | 24.01195 | 0.101185 | 25.05 |
| 2722   | 2017 | 0.503 | 0.02 | 0.856289 | 0.73323067 | 21.65772 | 0.047921 | 31.08 |
| 300280 | 2017 | 0.156 | 0.02 | 0.856289 | 0.73323067 | 20.79061 | 0.007098 | 26.17 |
| 2576   | 2017 | 0.622 | 0.02 | 0.856289 | 0.73323067 | 20.77364 | -0.00135 | 29.98 |
| 2293   | 2017 | 0.162 | 0.02 | 0.856289 | 0.73323067 | 22.24675 | 0.143708 | 17.73 |
| 300091 | 2017 | 0.029 | 0.02 | 0.856289 | 0.73323067 | 21.97663 | 0.081437 | 17.4  |
| 2394   | 2017 | 0.57  | 0.02 | 0.856289 | 0.73323067 | 22.15531 | 0.115844 | 40.45 |
| 2074   | 2017 | 0.728 | 0.02 | 0.856289 | 0.73323067 | 22.87169 | 0.101776 | 24.84 |
| 2722   | 2017 | -0.16 | 0.02 | 0.856289 | 0.73323067 | 21.65772 | 0.047921 | 31.08 |
| 600389 | 2017 | -0.21 | 0.02 | 0.856289 | 0.73323067 | 21.80594 | 0.159032 | 29.19 |
| 603036 | 2017 | 0.338 | 0.02 | 0.856289 | 0.73323067 | 20.79411 | 0.035978 | 14.79 |
| 600522 | 2017 | 0.121 | 0.02 | 0.856289 | 0.73323067 | 24.01195 | 0.101185 | 25.05 |
| 600389 | 2017 | 0.716 | 0.02 | 0.856289 | 0.73323067 | 21.80594 | 0.159032 | 29.19 |
| 2484   | 2017 | -0.14 | 0.02 | 0.856289 | 0.73323067 | 22.0708  | 0.063161 | 31.84 |
| 603968 | 2017 | 0.716 | 0.02 | 0.856289 | 0.73323067 | 21.24382 | 0.120634 | 9.98  |
| 2483   | 2017 | 0.143 | 0.02 | 0.856289 | 0.73323067 | 22.19519 | 0.045549 | 43.47 |
| 300091 | 2017 | 0.029 | 0.02 | 0.856289 | 0.73323067 | 21.97663 | 0.081437 | 17.4  |
| 2483   | 2017 | 0.584 | 0.02 | 0.856289 | 0.73323067 | 22.19519 | 0.045549 | 43.47 |
| 2483   | 2017 | 1.026 | 0.02 | 0.856289 | 0.73323067 | 22.19519 | 0.045549 | 43.47 |
| 2483   | 2017 | 0.544 | 0.02 | 0.856289 | 0.73323067 | 21.78143 | 0.045549 | 43.47 |
| 2074   | 2017 | 0.221 | 0.02 | 0.856289 | 0.73323067 | 23.56216 | 0.101776 | 24.84 |
| 2394   | 2017 | -0.43 | 0.02 | 0.856289 | 0.73323067 | 22.15531 | 0.115844 | 40.45 |
| 2484   | 2017 | -0.21 | 0.02 | 0.856289 | 0.73323067 | 22.0708  | 0.063161 | 31.84 |
| 2484   | 2017 | -0.03 | 0.02 | 0.856289 | 0.73323067 | 22.0708  | 0.063161 | 31.84 |
| 601222 | 2017 | -0.36 | 0.02 | 0.856289 | 0.73323067 | 23.54309 | 0.07548  | 35.25 |
| 603968 | 2017 | 0.716 | 0.02 | 0.856289 | 0.73323067 | 21.3167  | 0.120634 | 9.98  |
| 2239   | 2017 | -0.4  | 0.02 | 0.856289 | 0.73323067 | 22.88205 | 0.0706   | 16.25 |
| 300280 | 2017 | 0.428 | 0.02 | 0.856289 | 0.73323067 | 20.79061 | 0.007098 | 26.17 |
| 2239   | 2017 | -0.1  | 0.02 | 0.856289 | 0.73323067 | 22.88205 | 0.0706   | 16.25 |
| 35     | 2017 | -0.33 | 0.02 | 0.856289 | 0.73323067 | 22.81886 | 0.073775 | 29.59 |
| 601222 | 2017 | -0.36 | 0.02 | 0.856289 | 0.73323067 | 23.54309 | 0.07548  | 35.25 |
| 2722   | 2017 | 0.503 | 0.02 | 0.856289 | 0.73323067 | 21.65772 | 0.047921 | 31.08 |
| 2483   | 2017 | -0.3  | 0.02 | 0.856289 | 0.73323067 | 22.19519 | 0.045549 | 43.47 |
| 2483   | 2017 | 0.529 | 0.02 | 0.856289 | 0.73323067 | 22.19519 | 0.045549 | 43.47 |
| 2483   | 2017 | 0.849 | 0.02 | 0.856289 | 0.73323067 | 22.19519 | 0.045549 | 43.47 |
| 35     | 2017 | -0.33 | 0.02 | 0.856289 | 0.73323067 | 22.81886 | 0.025535 | 29.59 |
| 2239   | 2017 | -0.4  | 0.02 | 0.856289 | 0.73323067 | 22.88205 | 0.0706   | 16.25 |
| 603389 | 2017 | -0.4  | 0.02 | 0.856289 | 0.73323067 | 20.79502 | 0.069665 | 64.12 |
| 2156   | 2017 | 0.657 | 0.02 | 0.856289 | 0.73323067 | 23.2203  | 0.031503 | 31.25 |

|        |      |       |      |          |            |          |          |       |
|--------|------|-------|------|----------|------------|----------|----------|-------|
| 2722   | 2017 | 0.503 | 0.02 | 0.856289 | 0.73323067 | 21.65772 | 0.047921 | 31.08 |
| 2044   | 2017 | 0.142 | 0.02 | 0.856289 | 0.73323067 | 23.24735 | 0.090401 | 10.45 |
| 300265 | 2017 | 0.321 | 0.02 | 0.856289 | 0.73323067 | 21.47037 | 0.045974 | 55.19 |
| 600522 | 2017 | 0.087 | 0.02 | 0.856289 | 0.73323067 | 24.01195 | 0.101185 | 25.05 |
| 600389 | 2017 | 0.275 | 0.02 | 0.856289 | 0.73323067 | 21.80594 | 0.159032 | 29.19 |
| 600770 | 2017 | 0.958 | 0.02 | 0.856289 | 0.73323067 | 22.60031 | 0.028546 | 24.95 |
| 300265 | 2017 | -0.07 | 0.02 | 0.856289 | 0.73323067 | 21.47037 | 0.045974 | 55.19 |
| 2722   | 2017 | -0.82 | 0.02 | 0.856289 | 0.73323067 | 21.65772 | 0.047921 | 31.08 |
| 2722   | 2017 | 0.503 | 0.02 | 0.856289 | 0.73323067 | 21.65772 | 0.047921 | 31.08 |
| 2156   | 2017 | 0.624 | 0.02 | 0.856289 | 0.73323067 | 23.2203  | 0.031503 | 31.25 |
| 2576   | 2017 | 0.125 | 0.02 | 0.856289 | 0.73323067 | 20.77364 | -0.00135 | 29.98 |
| 2201   | 2017 | -0.47 | 0.02 | 0.856289 | 0.73323067 | 21.73156 | -0.00409 | 46.85 |
| 300421 | 2017 | 0.225 | 0.02 | 0.856289 | 0.73323067 | 21.14007 | 0.06317  | 26.98 |
| 300265 | 2017 | -0.3  | 0.02 | 0.856289 | 0.73323067 | 21.47037 | 0.045974 | 55.19 |
| 2438   | 2017 | 0.19  | 0.02 | 0.856289 | 0.73323067 | 21.79002 | 0.036265 | 15.01 |
| 603389 | 2017 | -0.55 | 0.02 | 0.856289 | 0.73323067 | 20.79502 | 0.069665 | 64.12 |
| 2483   | 2017 | 1.026 | 0.02 | 0.856289 | 0.73323067 | 22.19519 | 0.045549 | 43.47 |
| 300265 | 2017 | 0.097 | 0.02 | 0.856289 | 0.73323067 | 21.47037 | 0.045974 | 55.19 |
| 601222 | 2017 | -0.36 | 0.02 | 0.856289 | 0.73323067 | 23.54309 | 0.07548  | 35.25 |
| 2044   | 2017 | 0.142 | 0.02 | 0.856289 | 0.73323067 | 23.24735 | 0.090401 | 10.45 |
| 2239   | 2017 | -0.37 | 0.02 | 0.856289 | 0.73323067 | 22.88205 | 0.0706   | 16.25 |
| 2438   | 2017 | 0.453 | 0.02 | 0.856289 | 0.73323067 | 21.79002 | 0.036265 | 15.01 |
| 2156   | 2017 | -0.17 | 0.02 | 0.856289 | 0.73323067 | 22.96916 | 0.031503 | 31.25 |
| 2074   | 2017 | 0.331 | 0.02 | 0.856289 | 0.73323067 | 23.56216 | 0.101776 | 24.84 |
| 601222 | 2017 | -0.36 | 0.02 | 0.856289 | 0.73323067 | 23.54309 | 0.07548  | 35.25 |
| 2349   | 2017 | 0.925 | 0.02 | 0.856289 | 0.73323067 | 21.89933 | 0.071899 | 34.09 |
| 2074   | 2017 | 0.993 | 0.02 | 0.856289 | 0.73323067 | 23.56216 | 0.101776 | 24.84 |
| 2536   | 2017 | 0.151 | 0.02 | 1.02152  | 1.0435022  | 21.87889 | 0.117932 | 35.17 |
| 2714   | 2017 | -0.11 | 0.02 | 1.02152  | 1.0435022  | 23.90318 | 0.185727 | 42.48 |
| 2087   | 2017 | -0.63 | 0.02 | 1.02152  | 1.0435022  | 22.80088 | 0.0895   | 27.3  |
| 2714   | 2017 | -0.11 | 0.02 | 1.02152  | 1.0435022  | 23.65121 | 0.185727 | 42.48 |
| 2536   | 2017 | -0.51 | 0.02 | 1.02152  | 1.0435022  | 21.87889 | 0.117932 | 35.17 |
| 2087   | 2017 | -0.63 | 0.02 | 1.02152  | 1.0435022  | 22.93354 | 0.0895   | 27.3  |
| 2536   | 2017 | -0.51 | 0.02 | 1.02152  | 1.0435022  | 21.87889 | 0.117932 | 35.17 |
| 2536   | 2017 | -0.51 | 0.02 | 1.02152  | 1.0435022  | 21.87889 | 0.117932 | 35.17 |
| 2087   | 2017 | -0.63 | 0.02 | 1.02152  | 1.0435022  | 22.93354 | 0.0895   | 27.3  |
| 2536   | 2017 | -0.18 | 0.02 | 1.02152  | 1.0435022  | 21.87889 | 0.117932 | 35.17 |
| 2714   | 2017 | -0.11 | 0.02 | 1.02152  | 1.0435022  | 23.90318 | 0.185727 | 42.48 |
| 2536   | 2017 | -0.16 | 0.02 | 1.02152  | 1.0435022  | 21.87889 | 0.117932 | 35.17 |
| 2189   | 2017 | -0.02 | 0.02 | 1.02152  | 1.0435022  | 20.63769 | 0.03702  | 38.99 |
| 2189   | 2017 | -0.02 | 0.02 | 1.02152  | 1.0435022  | 20.63769 | 0.03702  | 38.99 |
| 2189   | 2017 | -0.02 | 0.02 | 1.02152  | 1.0435022  | 20.63769 | 0.03702  | 38.99 |
| 2189   | 2017 | -0.02 | 0.02 | 1.02152  | 1.0435022  | 20.5473  | 0.03702  | 38.99 |
| 2536   | 2017 | 0.151 | 0.02 | 1.02152  | 1.0435022  | 21.87889 | 0.117932 | 35.17 |
| 2536   | 2017 | -0.51 | 0.02 | 1.02152  | 1.0435022  | 21.87889 | 0.117932 | 35.17 |
| 2536   | 2017 | -0.07 | 0.02 | 1.02152  | 1.0435022  | 21.7202  | 0.117932 | 35.17 |
| 2189   | 2017 | -0.02 | 0.02 | 1.02152  | 1.0435022  | 20.63769 | 0.03702  | 38.99 |
| 300427 | 2017 | 0.578 | 0.03 | 1.509244 | 2.2778182  | 21.88425 | 0.068211 | 35.42 |
| 600549 | 2017 | -0.27 | 0.03 | 1.509244 | 2.2778182  | 23.65981 | 0.10677  | 31.9  |
| 600549 | 2017 | 0.726 | 0.03 | 1.509244 | 2.2778182  | 23.65981 | 0.10677  | 31.9  |
| 600057 | 2017 | -0.32 | 0.03 | 1.509244 | 2.2778182  | 24.54221 | 0.061988 | 53.97 |
| 300427 | 2017 | 0.468 | 0.03 | 1.509244 | 2.2778182  | 21.88425 | 0.068211 | 35.42 |
| 2614   | 2017 | -0.53 | 0.03 | 1.509244 | 2.2778182  | 22.30174 | 0.121365 | 27.65 |
| 2335   | 2017 | 0.034 | 0.03 | 1.509244 | 2.2778182  | 22.55333 | 0.119393 | 30.92 |

|        |      |       |      |          |           |          |          |       |
|--------|------|-------|------|----------|-----------|----------|----------|-------|
| 2335   | 2017 | 0.382 | 0.03 | 1.509244 | 2.2778182 | 22.55333 | 0.119393 | 30.92 |
| 603306 | 2017 | -0.43 | 0.03 | 1.509244 | 2.2778182 | 21.60271 | 0.129637 | 42.98 |
| 600815 | 2017 | -0.7  | 0.03 | 1.509244 | 2.2778182 | 22.58225 | 0.302158 | 40.98 |
| 701    | 2017 | -0.37 | 0.03 | 1.509244 | 2.2778182 | 23.46387 | 0.014232 | 16.66 |
| 600686 | 2017 | 0.649 | 0.03 | 1.509244 | 2.2778182 | 23.94613 | 0.170836 | 29.99 |
| 2398   | 2017 | 0.586 | 0.03 | 1.509244 | 2.2778182 | 21.86923 | 0.082941 | 17.58 |
| 2228   | 2017 | -0.86 | 0.03 | 1.509244 | 2.2778182 | 22.58918 | 0.068616 | 33.96 |
| 300188 | 2017 | 2.193 | 0.03 | 1.509244 | 2.2778182 | 21.85851 | 0.1116   | 23.12 |
| 2398   | 2017 | 0.233 | 0.03 | 1.509244 | 2.2778182 | 21.86923 | 0.082941 | 17.58 |
| 600057 | 2017 | -0.99 | 0.03 | 1.509244 | 2.2778182 | 24.54221 | 0.061988 | 53.97 |
| 2398   | 2017 | 0.674 | 0.03 | 1.509244 | 2.2778182 | 21.86923 | 0.082941 | 17.58 |
| 2335   | 2017 | 1.187 | 0.03 | 1.509244 | 2.2778182 | 22.55333 | 0.119393 | 30.92 |
| 600686 | 2017 | -0.68 | 0.03 | 1.509244 | 2.2778182 | 23.94613 | 0.170836 | 29.99 |
| 2593   | 2017 | -0.14 | 0.03 | 1.509244 | 2.2778182 | 22.0549  | 0.035925 | 41.04 |
| 300096 | 2017 | 2.04  | 0.03 | 1.509244 | 2.2778182 | 21.37049 | 0.035437 | 16.21 |
| 300188 | 2017 | 2.193 | 0.03 | 1.509244 | 2.2778182 | 21.85851 | 0.1116   | 23.12 |
| 2593   | 2017 | -0.52 | 0.03 | 1.509244 | 2.2778182 | 22.0549  | 0.035925 | 41.04 |
| 2788   | 2017 | 1.406 | 0.03 | 1.509244 | 2.2778182 | 21.65831 | 0.092575 | 35.21 |
| 600549 | 2017 | 0.726 | 0.03 | 1.509244 | 2.2778182 | 23.65981 | 0.10677  | 31.9  |
| 600815 | 2017 | -0.47 | 0.03 | 1.509244 | 2.2778182 | 22.58225 | 0.302158 | 40.98 |
| 300188 | 2017 | 1.96  | 0.03 | 1.509244 | 2.2778182 | 21.85851 | 0.1116   | 23.12 |
| 2593   | 2017 | 0.078 | 0.03 | 1.509244 | 2.2778182 | 22.0549  | 0.035925 | 41.04 |
| 2626   | 2017 | 0.639 | 0.03 | 1.509244 | 2.2778182 | 21.92458 | 0.186691 | 35.34 |
| 2614   | 2017 | -0.49 | 0.03 | 1.509244 | 2.2778182 | 22.30174 | 0.121365 | 27.65 |
| 600815 | 2017 | -0.52 | 0.03 | 1.509244 | 2.2778182 | 22.58225 | 0.302158 | 40.98 |
| 603306 | 2017 | -0.43 | 0.03 | 1.509244 | 2.2778182 | 21.60271 | 0.129637 | 42.98 |
| 600549 | 2017 | -0.18 | 0.03 | 1.509244 | 2.2778182 | 23.65981 | 0.10677  | 31.9  |
| 603909 | 2017 | -0.26 | 0.03 | 1.509244 | 2.2778182 | 20.41642 | 0.096418 | 10.65 |
| 2593   | 2017 | -0.14 | 0.03 | 1.509244 | 2.2778182 | 22.0549  | 0.035925 | 41.04 |
| 300188 | 2017 | 2.153 | 0.03 | 1.509244 | 2.2778182 | 21.85851 | 0.1116   | 23.12 |
| 300188 | 2017 | 2.193 | 0.03 | 1.509244 | 2.2778182 | 21.85851 | 0.1116   | 23.12 |
| 701    | 2017 | -0.93 | 0.03 | 1.509244 | 2.2778182 | 23.46387 | 0.014232 | 16.66 |
| 2398   | 2017 | -0.52 | 0.03 | 1.509244 | 2.2778182 | 21.86923 | 0.082941 | 17.58 |
| 2228   | 2017 | -0.64 | 0.03 | 1.509244 | 2.2778182 | 22.58918 | 0.068616 | 33.96 |
| 600057 | 2017 | -0.5  | 0.03 | 1.509244 | 2.2778182 | 24.54221 | 0.061988 | 53.97 |
| 2626   | 2017 | 0.166 | 0.03 | 1.509244 | 2.2778182 | 21.76812 | 0.186691 | 35.34 |
| 300056 | 2017 | -0.38 | 0.03 | 1.509244 | 2.2778182 | 21.72573 | 0.023869 | 14.89 |
| 2790   | 2017 | -0.27 | 0.03 | 1.509244 | 2.2778182 | 21.20123 | 0.110294 | 12.75 |
| 2398   | 2017 | -0.65 | 0.03 | 1.509244 | 2.2778182 | 21.86923 | 0.082941 | 17.58 |
| 2614   | 2017 | -0.7  | 0.03 | 1.509244 | 2.2778182 | 22.30174 | 0.121365 | 27.65 |
| 300056 | 2017 | -0.11 | 0.03 | 1.509244 | 2.2778182 | 21.30619 | 0.023869 | 14.89 |
| 2614   | 2017 | -0.49 | 0.03 | 1.509244 | 2.2778182 | 22.30174 | 0.121365 | 27.65 |
| 300341 | 2017 | 0.167 | 0.03 | 1.509244 | 2.2778182 | 20.63413 | 0.118162 | 40.92 |
| 2729   | 2017 | -0.65 | 0.03 | 1.509244 | 2.2778182 | 20.10336 | 0.054399 | 43.47 |
| 600563 | 2017 | 0.073 | 0.03 | 1.509244 | 2.2778182 | 21.70323 | 0.188308 | 37.33 |
| 300188 | 2017 | 2.153 | 0.03 | 1.509244 | 2.2778182 | 21.85851 | 0.1116   | 23.12 |
| 600815 | 2017 | -0.7  | 0.03 | 1.509244 | 2.2778182 | 22.58225 | 0.302158 | 40.98 |
| 2398   | 2017 | -0.65 | 0.03 | 1.509244 | 2.2778182 | 21.86923 | 0.082941 | 17.58 |
| 2398   | 2017 | -0.46 | 0.03 | 1.509244 | 2.2778182 | 21.86923 | 0.082941 | 17.58 |
| 300427 | 2017 | 0.413 | 0.03 | 1.509244 | 2.2778182 | 21.88425 | 0.068211 | 35.42 |
| 2614   | 2017 | -0.7  | 0.03 | 1.509244 | 2.2778182 | 22.30174 | 0.121365 | 27.65 |
| 600549 | 2017 | -0.06 | 0.03 | 1.509244 | 2.2778182 | 23.65981 | 0.10677  | 31.9  |
| 300096 | 2017 | 2.04  | 0.03 | 1.509244 | 2.2778182 | 21.37049 | 0.035437 | 16.21 |
| 701    | 2017 | -0.76 | 0.03 | 1.509244 | 2.2778182 | 23.46387 | 0.014232 | 16.66 |

|        |      |       |      |          |           |          |          |       |
|--------|------|-------|------|----------|-----------|----------|----------|-------|
| 300102 | 2017 | 0.385 | 0.03 | 1.509244 | 2.2778182 | 21.92844 | 0.077645 | 11.16 |
| 600686 | 2017 | -0.3  | 0.03 | 1.509244 | 2.2778182 | 23.94613 | 0.170836 | 29.99 |
| 2398   | 2017 | 0.233 | 0.03 | 1.509244 | 2.2778182 | 21.86923 | 0.082941 | 17.58 |
| 2398   | 2017 | -0.65 | 0.03 | 1.509244 | 2.2778182 | 21.86923 | 0.082941 | 17.58 |
| 300341 | 2017 | 0.073 | 0.03 | 1.509244 | 2.2778182 | 20.98151 | 0.118162 | 40.92 |
| 300341 | 2017 | 0.073 | 0.03 | 1.509244 | 2.2778182 | 20.98151 | 0.118162 | 40.92 |
| 2335   | 2017 | -0.14 | 0.03 | 1.509244 | 2.2778182 | 22.55333 | 0.119393 | 30.92 |
| 701    | 2017 | -0.93 | 0.03 | 1.509244 | 2.2778182 | 23.46387 | 0.014232 | 16.66 |
| 600057 | 2017 | -0.99 | 0.03 | 1.509244 | 2.2778182 | 24.54221 | 0.061988 | 53.97 |
| 600815 | 2017 | -0.7  | 0.03 | 1.509244 | 2.2778182 | 22.38227 | 0.302158 | 40.98 |
| 2228   | 2017 | -0.8  | 0.03 | 1.509244 | 2.2778182 | 22.58918 | 0.068616 | 33.96 |
| 600563 | 2017 | 0.073 | 0.03 | 1.509244 | 2.2778182 | 21.70323 | 0.188308 | 37.33 |
| 300188 | 2017 | 1.531 | 0.03 | 1.509244 | 2.2778182 | 21.85851 | 0.1116   | 23.12 |
| 600815 | 2017 | -0.7  | 0.03 | 1.509244 | 2.2778182 | 22.58225 | 0.302158 | 40.98 |
| 300056 | 2017 | -0.38 | 0.03 | 1.509244 | 2.2778182 | 21.72573 | 0.023869 | 14.89 |
| 2729   | 2017 | -0.65 | 0.03 | 1.509244 | 2.2778182 | 20.10336 | 0.054399 | 43.47 |
| 600549 | 2017 | 0.285 | 0.03 | 1.509244 | 2.2778182 | 23.65981 | 0.10677  | 31.9  |
| 2614   | 2017 | 0.098 | 0.03 | 1.509244 | 2.2778182 | 22.30174 | 0.121365 | 27.65 |
| 300341 | 2017 | 0.167 | 0.03 | 1.509244 | 2.2778182 | 20.98151 | 0.118162 | 40.92 |
| 2626   | 2017 | 0.639 | 0.03 | 1.509244 | 2.2778182 | 21.92458 | 0.186691 | 35.34 |
| 2398   | 2017 | 0.343 | 0.03 | 1.509244 | 2.2778182 | 21.86923 | 0.082941 | 17.58 |
| 600549 | 2017 | 0.064 | 0.03 | 1.509244 | 2.2778182 | 23.65981 | 0.10677  | 31.9  |
| 300056 | 2017 | -0.11 | 0.03 | 1.509244 | 2.2778182 | 21.72573 | 0.023869 | 14.89 |
| 300056 | 2017 | -0.11 | 0.03 | 1.509244 | 2.2778182 | 21.72573 | 0.023869 | 14.89 |
| 300188 | 2017 | 1.928 | 0.03 | 1.509244 | 2.2778182 | 21.85851 | 0.1116   | 23.12 |
| 2593   | 2017 | -0.58 | 0.03 | 1.509244 | 2.2778182 | 22.0549  | 0.035925 | 41.04 |
| 603909 | 2017 | -0.62 | 0.03 | 1.509244 | 2.2778182 | 20.41642 | 0.096418 | 10.65 |
| 2614   | 2017 | -0.7  | 0.03 | 1.509244 | 2.2778182 | 22.03932 | 0.121365 | 27.65 |
| 2335   | 2017 | 0.335 | 0.03 | 1.509244 | 2.2778182 | 22.55333 | 0.119393 | 30.92 |
| 2228   | 2017 | -0.86 | 0.03 | 1.509244 | 2.2778182 | 22.58918 | 0.068616 | 33.96 |
| 2335   | 2017 | -0.14 | 0.03 | 1.509244 | 2.2778182 | 22.55333 | 0.119393 | 30.92 |
| 600057 | 2017 | -0.99 | 0.03 | 1.509244 | 2.2778182 | 24.54221 | 0.061988 | 53.97 |
| 300102 | 2017 | 0.858 | 0.03 | 1.509244 | 2.2778182 | 22.38869 | 0.077645 | 11.16 |
| 300102 | 2017 | -0.34 | 0.03 | 1.509244 | 2.2778182 | 22.38869 | 0.077645 | 11.16 |
| 300427 | 2017 | 0.247 | 0.03 | 1.509244 | 2.2778182 | 21.88425 | 0.068211 | 35.42 |
| 600686 | 2017 | -0.19 | 0.03 | 1.509244 | 2.2778182 | 23.94613 | 0.170836 | 29.99 |
| 2228   | 2017 | -0.86 | 0.03 | 1.509244 | 2.2778182 | 22.22884 | 0.068616 | 33.96 |
| 2593   | 2017 | -0.58 | 0.03 | 1.509244 | 2.2778182 | 22.0549  | 0.035925 | 41.04 |
| 300188 | 2017 | 1.247 | 0.03 | 1.509244 | 2.28E+00  | 21.85851 | 0.1116   | 23.12 |
| 600549 | 2017 | 0.064 | 0.03 | 1.509244 | 2.28E+00  | 23.65981 | 0.10677  | 31.9  |
| 2593   | 2017 | -0.47 | 0.03 | 1.509244 | 2.28E+00  | 22.0549  | 0.035925 | 41.04 |
| 600815 | 2017 | -0.2  | 0.03 | 1.509244 | 2.28E+00  | 22.58225 | 0.302158 | 40.98 |
| 600549 | 2017 | 0.726 | 0.03 | 1.509244 | 2.28E+00  | 23.65981 | 0.10677  | 31.9  |
| 2398   | 2017 | 0.233 | 0.03 | 1.509244 | 2.28E+00  | 21.86923 | 0.082941 | 17.58 |
| 2335   | 2017 | 0.794 | 0.03 | 1.509244 | 2.28E+00  | 22.55333 | 0.119393 | 30.92 |
| 300341 | 2017 | 0.167 | 0.03 | 1.509244 | 2.2778182 | 20.98151 | 0.118162 | 40.92 |
| 300096 | 2017 | 2.04  | 0.03 | 1.509244 | 2.2778182 | 21.37049 | 0.035437 | 16.21 |
| 2614   | 2017 | -0.7  | 0.03 | 1.509244 | 2.2778182 | 22.30174 | 0.121365 | 27.65 |
| 701    | 2017 | -0.93 | 0.03 | 1.509244 | 2.2778182 | 23.46387 | 0.014232 | 16.66 |
| 603909 | 2017 | -0.62 | 0.03 | 1.509244 | 2.2778182 | 20.41642 | 0.096418 | 10.65 |
| 2398   | 2017 | 0.674 | 0.03 | 1.509244 | 2.2778182 | 21.86923 | 0.082941 | 17.58 |
| 600815 | 2017 | -0.03 | 0.03 | 1.509244 | 2.2778182 | 22.58225 | 0.302158 | 40.98 |
| 600549 | 2017 | -0.6  | 0.03 | 1.509244 | 2.2778182 | 23.65981 | 0.10677  | 31.9  |
| 300427 | 2017 | 0.578 | 0.03 | 1.509244 | 2.2778182 | 21.57265 | 0.068211 | 35.42 |

|        |      |       |      |          |           |          |          |       |
|--------|------|-------|------|----------|-----------|----------|----------|-------|
| 600057 | 2017 | -0.35 | 0.03 | 1.509244 | 2.2778182 | 24.54221 | 0.061988 | 53.97 |
| 300188 | 2017 | 1.696 | 0.03 | 1.509244 | 2.2778182 | 21.80018 | 0.1116   | 23.12 |
| 600549 | 2017 | -0.6  | 0.03 | 1.509244 | 2.2778182 | 23.65981 | 0.10677  | 31.9  |
| 600549 | 2017 | -0.6  | 0.03 | 1.509244 | 2.2778182 | 23.20508 | 0.10677  | 31.9  |
| 701    | 2017 | -0.93 | 0.03 | 1.509244 | 2.2778182 | 23.46387 | 0.014232 | 16.66 |
| 2398   | 2017 | 0.233 | 0.03 | 1.509244 | 2.2778182 | 21.86923 | 0.082941 | 17.58 |
| 300341 | 2017 | 0.167 | 0.03 | 1.509244 | 2.2778182 | 20.98151 | 0.118162 | 40.92 |
| 2790   | 2017 | -0.27 | 0.03 | 1.509244 | 2.2778182 | 21.20123 | 0.110294 | 12.75 |
| 300096 | 2017 | 2.04  | 0.03 | 1.509244 | 2.2778182 | 21.37049 | 0.035437 | 16.21 |
| 2398   | 2017 | 0.674 | 0.03 | 1.509244 | 2.2778182 | 20.94965 | 0.082941 | 17.58 |
| 300056 | 2017 | -0.38 | 0.03 | 1.509244 | 2.2778182 | 21.72573 | 0.023869 | 14.89 |
| 300096 | 2017 | 0.715 | 0.03 | 1.509244 | 2.2778182 | 21.37049 | 0.035437 | 16.21 |
| 2335   | 2017 | 0.289 | 0.03 | 1.509244 | 2.2778182 | 22.55333 | 0.119393 | 30.92 |
| 2398   | 2017 | 0.224 | 0.03 | 1.509244 | 2.2778182 | 21.86923 | 0.082941 | 17.58 |
| 300341 | 2017 | 0.167 | 0.03 | 1.509244 | 2.2778182 | 20.98151 | 0.118162 | 40.92 |
| 600686 | 2017 | -0.41 | 0.03 | 1.509244 | 2.2778182 | 23.94613 | 0.170836 | 29.99 |
| 300056 | 2017 | -0.38 | 0.03 | 1.509244 | 2.2778182 | 21.72573 | 0.023869 | 14.89 |
| 300188 | 2017 | 0.868 | 0.03 | 1.509244 | 2.2778182 | 21.85851 | 0.1116   | 23.12 |
| 2626   | 2017 | -0.69 | 0.03 | 1.509244 | 2.2778182 | 21.92458 | 0.186691 | 35.34 |
| 2614   | 2017 | -0.7  | 0.03 | 1.509244 | 2.2778182 | 22.30174 | 0.121365 | 27.65 |
| 2398   | 2017 | 0.674 | 0.03 | 1.509244 | 2.2778182 | 21.86923 | 0.082941 | 17.58 |
| 2228   | 2017 | -0.86 | 0.03 | 1.509244 | 2.2778182 | 22.58918 | 0.068616 | 33.96 |
| 600563 | 2017 | 0.073 | 0.03 | 1.509244 | 2.2778182 | 21.70323 | 0.188308 | 37.33 |
| 2790   | 2017 | -0.27 | 0.03 | 1.509244 | 2.2778182 | 21.20157 | 0.110294 | 12.75 |
| 600549 | 2017 | -0.6  | 0.03 | 1.509244 | 2.28E+00  | 23.65981 | 0.10677  | 31.9  |
| 2614   | 2017 | -0.52 | 0.03 | 1.509244 | 2.28E+00  | 22.30174 | 0.121365 | 27.65 |
| 300188 | 2017 | 1.531 | 0.03 | 1.509244 | 2.28E+00  | 21.85851 | 0.1116   | 23.12 |
| 2729   | 2017 | -0.65 | 0.03 | 1.509244 | 2.28E+00  | 20.10336 | 0.054399 | 43.47 |
| 600549 | 2017 | 0.726 | 0.03 | 1.509244 | 2.28E+00  | 23.65981 | 0.10677  | 31.9  |
| 600549 | 2017 | -0.6  | 0.03 | 1.509244 | 2.28E+00  | 23.65981 | 0.10677  | 31.9  |
| 600549 | 2017 | -0.21 | 0.03 | 1.509244 | 2.28E+00  | 23.65981 | 0.10677  | 31.9  |
| 600549 | 2017 | 0.726 | 0.03 | 1.509244 | 2.2778182 | 23.65981 | 0.10677  | 31.9  |
| 300427 | 2017 | 0.38  | 0.03 | 1.509244 | 2.2778182 | 21.88425 | 0.068211 | 35.42 |
| 600686 | 2017 | -0.22 | 0.03 | 1.509244 | 2.2778182 | 21.89695 | 0.170836 | 29.99 |
| 600815 | 2017 | -0.52 | 0.03 | 1.509244 | 2.2778182 | 22.58225 | 0.302158 | 40.98 |
| 2335   | 2017 | 0.377 | 0.03 | 1.509244 | 2.2778182 | 22.55333 | 0.119393 | 30.92 |
| 600686 | 2017 | -0.06 | 0.03 | 1.509244 | 2.2778182 | 23.94613 | 0.170836 | 29.99 |
| 603909 | 2017 | -0.62 | 0.03 | 1.509244 | 2.2778182 | 20.10336 | 0.096418 | 10.65 |
| 300188 | 2017 | 1.531 | 0.03 | 1.509244 | 2.2778182 | 21.85851 | 0.1116   | 23.12 |
| 701    | 2017 | -0.75 | 0.03 | 1.509244 | 2.2778182 | 23.46387 | 0.014232 | 16.66 |
| 600815 | 2017 | -0.26 | 0.03 | 1.509244 | 2.2778182 | 22.58225 | 0.302158 | 40.98 |
| 600563 | 2017 | 0.073 | 0.03 | 1.509244 | 2.2778182 | 21.64213 | 0.188308 | 37.33 |
| 600563 | 2017 | 0.073 | 0.03 | 1.509244 | 2.2778182 | 21.70323 | 0.188308 | 37.33 |
| 2614   | 2017 | -0.46 | 0.03 | 1.509244 | 2.2778182 | 22.30174 | 0.121365 | 27.65 |
| 600549 | 2017 | -0.6  | 0.03 | 1.509244 | 2.2778182 | 23.65981 | 0.10677  | 31.9  |
| 2614   | 2017 | -0.51 | 0.03 | 1.509244 | 2.2778182 | 22.30174 | 0.121365 | 27.65 |
| 300102 | 2017 | 0.374 | 0.03 | 1.509244 | 2.2778182 | 22.38869 | 0.077645 | 11.16 |
| 600057 | 2017 | -0.99 | 0.03 | 1.509244 | 2.2778182 | 23.25507 | 0.061988 | 53.97 |
| 2593   | 2017 | -0.58 | 0.03 | 1.509244 | 2.2778182 | 22.0549  | 0.035925 | 41.04 |
| 701    | 2017 | -0.93 | 0.03 | 1.509244 | 2.2778182 | 23.27582 | 0.014232 | 16.66 |
| 701    | 2017 | -0.93 | 0.03 | 1.509244 | 2.2778182 | 23.46387 | 0.014232 | 16.66 |
| 600686 | 2017 | -0.06 | 0.03 | 1.509244 | 2.2778182 | 23.94613 | 0.170836 | 29.99 |
| 600549 | 2017 | 0.726 | 0.03 | 1.509244 | 2.2778182 | 23.65981 | 0.10677  | 31.9  |
| 300056 | 2017 | -0.24 | 0.03 | 1.509244 | 2.2778182 | 21.72573 | 0.023869 | 14.89 |

|        |      |       |      |          |           |          |          |       |
|--------|------|-------|------|----------|-----------|----------|----------|-------|
| 2335   | 2017 | 0.355 | 0.03 | 1.509244 | 2.2778182 | 22.24873 | 0.119393 | 30.92 |
| 600686 | 2017 | -0.49 | 0.03 | 1.509244 | 2.2778182 | 23.94613 | 0.170836 | 29.99 |
| 2626   | 2017 | 0.639 | 0.03 | 1.509244 | 2.2778182 | 21.92458 | 0.186691 | 35.34 |
| 2335   | 2017 | 0.525 | 0.03 | 1.509244 | 2.2778182 | 22.55333 | 0.119393 | 30.92 |
| 2335   | 2017 | 0.525 | 0.03 | 1.509244 | 2.2778182 | 22.55333 | 0.119393 | 30.92 |
| 300096 | 2017 | 0.715 | 0.03 | 1.509244 | 2.2778182 | 21.37049 | 0.035437 | 16.21 |
| 600686 | 2017 | -0.68 | 0.03 | 1.509244 | 2.2778182 | 23.94613 | 0.170836 | 29.99 |
| 600686 | 2017 | -0.29 | 0.03 | 1.509244 | 2.2778182 | 23.94613 | 0.170836 | 29.99 |
| 300102 | 2017 | 0.858 | 0.03 | 1.509244 | 2.2778182 | 22.38869 | 0.077645 | 11.16 |
| 2626   | 2017 | 0.639 | 0.03 | 1.509244 | 2.2778182 | 21.92458 | 0.186691 | 35.34 |
| 2626   | 2017 | 0.351 | 0.03 | 1.509244 | 2.2778182 | 21.92458 | 0.186691 | 35.34 |
| 2335   | 2017 | 0.377 | 0.03 | 1.509244 | 2.2778182 | 22.55333 | 0.119393 | 30.92 |
| 600686 | 2017 | -0.06 | 0.03 | 1.509244 | 2.2778182 | 23.94613 | 0.170836 | 29.99 |
| 600549 | 2017 | 0.726 | 0.03 | 1.509244 | 2.2778182 | 23.65981 | 0.10677  | 31.9  |
| 2228   | 2017 | -0.86 | 0.03 | 1.509244 | 2.2778182 | 22.58918 | 0.068616 | 33.96 |
| 2398   | 2017 | 0.012 | 0.03 | 1.509244 | 2.2778182 | 21.86923 | 0.082941 | 17.58 |
| 600686 | 2017 | -0.39 | 0.03 | 1.509244 | 2.2778182 | 23.94613 | 0.170836 | 29.99 |
| 300188 | 2017 | 2.193 | 0.03 | 1.509244 | 2.2778182 | 21.85851 | 0.1116   | 23.12 |
| 2228   | 2017 | -0.79 | 0.03 | 1.509244 | 2.2778182 | 22.58918 | 0.068616 | 33.96 |
| 603306 | 2017 | -0.43 | 0.03 | 1.509244 | 2.2778182 | 21.60271 | 0.129637 | 42.98 |
| 2788   | 2017 | 1.406 | 0.03 | 1.509244 | 2.2778182 | 22.35884 | 0.092575 | 35.21 |
| 300427 | 2017 | 0.38  | 0.03 | 1.509244 | 2.2778182 | 21.88425 | 0.068211 | 35.42 |
| 603909 | 2017 | 0.262 | 0.03 | 1.509244 | 2.2778182 | 20.41642 | 0.096418 | 10.65 |
| 300096 | 2017 | 0.715 | 0.03 | 1.509244 | 2.2778182 | 21.37049 | 0.035437 | 16.21 |
| 603909 | 2017 | -0.46 | 0.03 | 1.509244 | 2.2778182 | 20.41642 | 0.096418 | 10.65 |
| 600549 | 2017 | -0.6  | 0.03 | 1.509244 | 2.2778182 | 23.65981 | 0.10677  | 31.9  |
| 300102 | 2017 | 0.858 | 0.03 | 1.509244 | 2.2778182 | 22.38869 | 0.077645 | 11.16 |
| 300102 | 2017 | 0.385 | 0.03 | 1.509244 | 2.2778182 | 22.38869 | 0.077645 | 11.16 |
| 600057 | 2017 | -0.37 | 0.03 | 1.509244 | 2.2778182 | 24.54221 | 0.061988 | 53.97 |
| 2398   | 2017 | -0.65 | 0.03 | 1.509244 | 2.2778182 | 21.86923 | 0.082941 | 17.58 |
| 600057 | 2017 | -0.99 | 0.03 | 1.509244 | 2.2778182 | 24.54221 | 0.061988 | 53.97 |
| 2614   | 2017 | -0.61 | 0.03 | 1.509244 | 2.2778182 | 22.30174 | 0.121365 | 27.65 |
| 2335   | 2017 | -0.14 | 0.03 | 1.509244 | 2.2778182 | 22.55333 | 0.119393 | 30.92 |
| 2593   | 2017 | -0.58 | 0.03 | 1.509244 | 2.2778182 | 22.0549  | 0.035925 | 41.04 |
| 300341 | 2017 | 0.107 | 0.03 | 1.509244 | 2.2778182 | 20.98151 | 0.118162 | 40.92 |
| 300102 | 2017 | 0.534 | 0.03 | 1.509244 | 2.2778182 | 22.38869 | 0.077645 | 11.16 |
| 2614   | 2017 | -0.54 | 0.03 | 1.509244 | 2.2778182 | 22.30174 | 0.121365 | 27.65 |
| 2729   | 2017 | -0.65 | 0.03 | 1.509244 | 2.2778182 | 20.10336 | 0.054399 | 43.47 |
| 603909 | 2017 | 0.704 | 0.03 | 1.509244 | 2.2778182 | 20.41642 | 0.096418 | 10.65 |
| 701    | 2017 | -0.14 | 0.03 | 1.509244 | 2.2778182 | 23.46387 | 0.014232 | 16.66 |
| 2228   | 2017 | -0.86 | 0.03 | 1.509244 | 2.2778182 | 22.58918 | 0.068616 | 33.96 |
| 603909 | 2017 | 0.262 | 0.03 | 1.509244 | 2.2778182 | 20.41642 | 0.096418 | 10.65 |
| 300102 | 2017 | 0.858 | 0.03 | 1.509244 | 2.2778182 | 22.38869 | 0.077645 | 11.16 |
| 2593   | 2017 | -0.58 | 0.03 | 1.509244 | 2.2778182 | 21.56385 | 0.035925 | 41.04 |
| 600549 | 2017 | 0.224 | 0.03 | 1.509244 | 2.2778182 | 23.65981 | 0.10677  | 31.9  |
| 2228   | 2017 | -0.86 | 0.03 | 1.509244 | 2.2778182 | 22.58918 | 0.068616 | 33.96 |
| 701    | 2017 | -0.93 | 0.03 | 1.509244 | 2.2778182 | 23.46387 | 0.014232 | 16.66 |
| 2228   | 2017 | -0.86 | 0.03 | 1.509244 | 2.2778182 | 22.58918 | 0.068616 | 33.96 |
| 2593   | 2017 | -0.58 | 0.03 | 1.509244 | 2.2778182 | 22.0549  | 0.035925 | 41.04 |
| 2729   | 2017 | -0.65 | 0.03 | 1.509244 | 2.2778182 | 20.10336 | 0.054399 | 43.47 |
| 2788   | 2017 | 1.406 | 0.03 | 1.509244 | 2.2778182 | 22.35884 | 0.092575 | 35.21 |
| 2228   | 2017 | -0.86 | 0.03 | 1.509244 | 2.2778182 | 22.58918 | 0.068616 | 33.96 |
| 600549 | 2017 | 0.726 | 0.03 | 1.509244 | 2.2778182 | 23.65981 | 0.10677  | 31.9  |
| 701    | 2017 | -0.93 | 0.03 | 1.509244 | 2.2778182 | 23.46387 | 0.014232 | 16.66 |

|        |      |       |      |          |            |          |          |       |
|--------|------|-------|------|----------|------------|----------|----------|-------|
| 2614   | 2017 | -0.64 | 0.03 | 1.509244 | 2.2778182  | 22.30174 | 0.121365 | 27.65 |
| 2614   | 2017 | -0.56 | 0.03 | 1.509244 | 2.2778182  | 22.30174 | 0.121365 | 27.65 |
| 2626   | 2017 | 0.639 | 0.03 | 1.509244 | 2.2778182  | 21.92458 | 0.186691 | 35.34 |
| 300096 | 2017 | 1.031 | 0.03 | 1.509244 | 2.2778182  | 21.37049 | 0.035437 | 16.21 |
| 2228   | 2017 | -0.4  | 0.03 | 1.509244 | 2.2778182  | 22.58918 | 0.068616 | 33.96 |
| 300096 | 2017 | 1.225 | 0.03 | 1.509244 | 2.2778182  | 21.19564 | 0.035437 | 16.21 |
| 300056 | 2017 | -0.38 | 0.03 | 1.509244 | 2.2778182  | 21.72573 | 0.023869 | 14.89 |
| 2131   | 2017 | -0.78 | 0.05 | 0.059264 | 0.00351219 | 23.31435 | 0.056905 | 15.2  |
| 2641   | 2017 | -0.41 | 0.05 | 0.059264 | 0.00351219 | 22.25636 | 0.071612 | 42.05 |
| 2126   | 2017 | -0.38 | 0.05 | 0.059264 | 0.00351219 | 22.6221  | 0.093061 | 10.04 |
| 2126   | 2017 | -0.56 | 0.05 | 0.059264 | 0.00351219 | 22.6221  | 0.093061 | 10.04 |
| 2126   | 2017 | 0.175 | 0.05 | 0.059264 | 0.00351219 | 22.6221  | 0.093061 | 10.04 |
| 600267 | 2017 | -0.39 | 0.05 | 0.059264 | 0.00351219 | 23.79764 | 0.029404 | 33.22 |
| 2372   | 2017 | -0.4  | 0.05 | 0.059264 | 0.00351219 | 22.15785 | 0.25572  | 36.46 |
| 300351 | 2017 | -0.41 | 0.05 | 0.059264 | 0.00351219 | 21.93608 | 0.056592 | 15.71 |
| 2126   | 2017 | -0.56 | 0.05 | 0.059264 | 0.00351219 | 22.6221  | 0.093061 | 10.04 |
| 2795   | 2017 | -0.7  | 0.05 | 0.059264 | 0.00351219 | 20.44989 | 0.094087 | 38.25 |
| 2126   | 2017 | -0.56 | 0.05 | 0.059264 | 0.00351219 | 22.6221  | 0.093061 | 10.04 |
| 2099   | 2017 | 0.782 | 0.05 | 0.059264 | 0.00351219 | 22.73375 | 0.06658  | 35.52 |
| 2126   | 2017 | -0.56 | 0.05 | 0.059264 | 0.00351219 | 22.6221  | 0.093061 | 10.04 |
| 2250   | 2017 | 0.532 | 0.05 | 0.059264 | 0.00351219 | 22.88112 | 0.036806 | 27.49 |
| 603456 | 2017 | 0.783 | 0.05 | 0.059264 | 0.00351219 | 21.86829 | 0.054756 | 43.97 |
| 2032   | 2017 | -0.34 | 0.05 | 0.059264 | 0.00351219 | 22.93939 | 0.251582 | 74.18 |
| 2403   | 2017 | -0.1  | 0.05 | 0.059264 | 0.00351219 | 22.19005 | 0.072224 | 35.07 |
| 2250   | 2017 | 0.753 | 0.05 | 0.059264 | 0.00351219 | 22.88112 | 0.036806 | 27.49 |
| 2003   | 2017 | -0.19 | 0.05 | 0.059264 | 0.00351219 | 21.83277 | 0.16411  | 29.47 |
| 2003   | 2017 | -0.16 | 0.05 | 0.059264 | 0.00351219 | 21.83277 | 0.16411  | 29.47 |
| 300351 | 2017 | 0.084 | 0.05 | 0.059264 | 0.00351219 | 21.93608 | 0.056592 | 15.71 |
| 600521 | 2017 | 1.131 | 0.05 | 0.059264 | 0.00351219 | 22.83552 | 0.123367 | 26.47 |
| 2326   | 2017 | 0.766 | 0.05 | 0.059264 | 0.00351219 | 22.28872 | 0.067027 | 23.15 |
| 2664   | 2017 | -0.62 | 0.05 | 0.059264 | 0.00351219 | 21.97397 | 0.1362   | 26    |
| 603456 | 2017 | 0.783 | 0.05 | 0.059264 | 0.00351219 | 21.86829 | 0.054756 | 43.97 |
| 603456 | 2017 | 0.783 | 0.05 | 0.059264 | 0.00351219 | 21.86829 | 0.054756 | 43.97 |
| 2686   | 2017 | 0.325 | 0.05 | 0.059264 | 0.00351219 | 21.6727  | 0.09971  | 14.22 |
| 2389   | 2017 | 0.771 | 0.05 | 0.059264 | 0.00351219 | 22.74303 | 0.031967 | 21.8  |
| 2131   | 2017 | -0.58 | 0.05 | 0.059264 | 0.00351219 | 23.31435 | 0.056905 | 15.2  |
| 600512 | 2017 | 0.154 | 0.05 | 0.059264 | 0.00351219 | 23.12172 | 0.028558 | 8.26  |
| 603239 | 2017 | -0.61 | 0.05 | 0.059264 | 0.00351219 | 20.90911 | 0.171234 | 47.21 |
| 2403   | 2017 | -0.46 | 0.05 | 0.059264 | 0.00351219 | 21.98824 | 0.072224 | 35.07 |
| 300351 | 2017 | -0.41 | 0.05 | 0.059264 | 0.00351219 | 21.93608 | 0.056592 | 15.71 |
| 2664   | 2017 | 0.042 | 0.05 | 0.059264 | 0.00351219 | 21.97397 | 0.1362   | 26    |
| 2273   | 2017 | -0.29 | 0.05 | 0.059264 | 0.00351219 | 22.27917 | 0.102188 | 19.72 |
| 2403   | 2017 | -0.64 | 0.05 | 0.059264 | 0.00351219 | 22.19005 | 0.072224 | 35.07 |
| 603239 | 2017 | -0.61 | 0.05 | 0.059264 | 0.00351219 | 20.91287 | 0.171234 | 47.21 |
| 603010 | 2017 | 0.572 | 0.05 | 0.059264 | 0.00351219 | 21.31591 | 0.082806 | 29.35 |
| 2641   | 2017 | -0.41 | 0.05 | 0.059264 | 0.00351219 | 22.25636 | 0.071612 | 42.05 |
| 603010 | 2017 | 0.572 | 0.05 | 0.059264 | 0.00351219 | 21.07287 | 0.082806 | 29.35 |
| 2389   | 2017 | 0.992 | 0.05 | 0.059264 | 0.00351219 | 22.74303 | 0.031967 | 21.8  |
| 2131   | 2017 | -0.12 | 0.05 | 0.059264 | 0.00351219 | 23.31435 | 0.056905 | 15.2  |
| 2126   | 2017 | -0.37 | 0.05 | 0.059264 | 0.00351219 | 22.6221  | 0.093061 | 10.04 |
| 2686   | 2017 | -0.34 | 0.05 | 0.059264 | 0.00351219 | 21.6727  | 0.09971  | 14.22 |
| 2273   | 2017 | -0.38 | 0.05 | 0.059264 | 0.00351219 | 22.36313 | 0.102188 | 19.72 |
| 2686   | 2017 | -0.29 | 0.05 | 0.059264 | 0.00351219 | 21.6727  | 0.09971  | 14.22 |
| 603033 | 2017 | 0.441 | 0.05 | 0.059264 | 0.00351219 | 21.04398 | 0.04988  | 38.48 |



|        |      |       |      |          |            |          |          |       |
|--------|------|-------|------|----------|------------|----------|----------|-------|
| 2273   | 2017 | -0.21 | 0.05 | 0.059264 | 0.00351219 | 22.36313 | 0.102188 | 19.72 |
| 2326   | 2017 | 0.766 | 0.05 | 0.059264 | 0.00351219 | 22.49207 | 0.067027 | 23.15 |
| 2489   | 2017 | -0.82 | 0.05 | 0.059264 | 0.00351219 | 22.8554  | 0.020987 | 37.94 |
| 2389   | 2017 | 0.992 | 0.05 | 0.059264 | 0.00351219 | 22.74303 | 0.031967 | 21.8  |
| 2664   | 2017 | -0.09 | 0.05 | 0.059264 | 0.00351219 | 21.97397 | 0.1362   | 26    |
| 2472   | 2017 | -0.51 | 0.05 | 0.059264 | 0.00351219 | 22.54472 | 0.070455 | 8.77  |
| 2641   | 2017 | -0.21 | 0.05 | 0.059264 | 0.00351219 | 22.25636 | 0.071612 | 42.05 |
| 2003   | 2017 | 0.251 | 0.05 | 0.059264 | 0.00351219 | 21.83277 | 0.16411  | 29.47 |
| 2032   | 2017 | -0.55 | 0.05 | 0.059264 | 0.00351219 | 22.93939 | 0.251582 | 74.18 |
| 2332   | 2017 | -0.07 | 0.05 | 0.059264 | 0.00351219 | 22.35927 | 0.096438 | 21.55 |
| 2131   | 2017 | -0.58 | 0.05 | 0.059264 | 0.00351219 | 23.31435 | 0.056905 | 15.2  |
| 2032   | 2017 | -0.67 | 0.05 | 0.059264 | 0.00351219 | 22.93939 | 0.251582 | 74.18 |
| 603033 | 2017 | 0.441 | 0.05 | 0.059264 | 0.00351219 | 21.03014 | 0.04988  | 38.48 |
| 913    | 2017 | 0.333 | 0.05 | 0.059264 | 0.00351219 | 22.08894 | 0.031103 | 29.77 |
| 2099   | 2017 | 0.488 | 0.05 | 0.059264 | 0.00351219 | 22.73375 | 0.06658  | 35.52 |
| 2273   | 2017 | 0.332 | 0.05 | 0.059264 | 0.00351219 | 22.36313 | 0.102188 | 19.72 |
| 603996 | 2017 | -0.11 | 0.05 | 0.059264 | 0.00351219 | 22.25679 | 0.0976   | 51.16 |
| 2725   | 2017 | -0.64 | 0.05 | 0.059264 | 0.00351219 | 20.83143 | 0.017523 | 12.56 |
| 600521 | 2017 | 0.267 | 0.05 | 0.059264 | 0.00351219 | 22.83552 | 0.123367 | 26.47 |
| 603456 | 2017 | 0.783 | 0.05 | 0.059264 | 0.00351219 | 21.86829 | 0.054756 | 43.97 |
| 2332   | 2017 | -0.07 | 0.05 | 0.059264 | 0.00351219 | 22.35927 | 0.096438 | 21.55 |
| 2250   | 2017 | 0.447 | 0.05 | 0.059264 | 0.00351219 | 22.88112 | 0.036806 | 27.49 |
| 300256 | 2017 | 0.043 | 0.05 | 0.059264 | 0.00351219 | 22.16367 | 0.019715 | 13.47 |
| 2664   | 2017 | 0.042 | 0.05 | 0.059264 | 0.00351219 | 21.97397 | 0.1362   | 26    |
| 300256 | 2017 | 0.043 | 0.05 | 0.059264 | 0.00351219 | 22.91699 | 0.019715 | 13.47 |
| 300256 | 2017 | 0.025 | 0.05 | 0.059264 | 0.00351219 | 22.91699 | 0.019715 | 13.47 |
| 2664   | 2017 | 0.042 | 0.05 | 0.059264 | 0.00351219 | 21.97397 | 0.1362   | 26    |
| 2472   | 2017 | -0.7  | 0.05 | 0.059264 | 0.00351219 | 22.73646 | 0.070455 | 8.77  |
| 2686   | 2017 | -0.56 | 0.05 | 0.059264 | 0.00351219 | 21.6727  | 0.09971  | 14.22 |
| 600521 | 2017 | -0.19 | 0.05 | 0.059264 | 0.00351219 | 22.83552 | 0.123367 | 26.47 |
| 2725   | 2017 | -0.64 | 0.05 | 0.059264 | 0.00351219 | 20.8353  | 0.017523 | 12.56 |
| 2273   | 2017 | -0.29 | 0.05 | 0.059264 | 0.00351219 | 22.36313 | 0.102188 | 19.72 |
| 603520 | 2017 | 1.155 | 0.05 | 0.059264 | 0.00351219 | 21.42308 | 0.09333  | 21.38 |
| 2003   | 2017 | -0.02 | 0.05 | 0.059264 | 0.00351219 | 21.83277 | 0.16411  | 29.47 |
| 2273   | 2017 | -0.29 | 0.05 | 0.059264 | 0.00351219 | 22.36313 | 0.102188 | 19.72 |
| 913    | 2017 | -0.22 | 0.05 | 0.059264 | 0.00351219 | 21.57652 | 0.031103 | 29.77 |
| 2641   | 2017 | -0.65 | 0.05 | 0.059264 | 0.00351219 | 22.25636 | 0.071612 | 42.05 |
| 913    | 2017 | 0.353 | 0.05 | 0.059264 | 0.00351219 | 22.08894 | 0.031103 | 29.77 |
| 603456 | 2017 | 0.783 | 0.05 | 0.059264 | 0.00351219 | 21.86829 | 0.054756 | 43.97 |
| 600521 | 2017 | 0.303 | 0.05 | 0.059264 | 0.00351219 | 22.83552 | 0.123367 | 26.47 |
| 2403   | 2017 | -0.66 | 0.05 | 0.059264 | 0.00351219 | 22.19005 | 0.072224 | 35.07 |
| 603456 | 2017 | 0.783 | 0.05 | 0.059264 | 0.00351219 | 21.76387 | 0.054756 | 43.97 |
| 2112   | 2017 | 0.927 | 0.05 | 0.059264 | 0.00351219 | 20.88759 | -0.32925 | 14.77 |
| 603010 | 2017 | 0.572 | 0.05 | 0.059264 | 0.00351219 | 21.31591 | 0.082806 | 29.35 |
| 2032   | 2017 | -0.55 | 0.05 | 0.059264 | 0.00351219 | 22.41821 | 0.251582 | 74.18 |
| 2099   | 2017 | 0.782 | 0.05 | 0.059264 | 0.00351219 | 22.42028 | 0.06658  | 35.52 |
| 2472   | 2017 | -0.7  | 0.05 | 0.059264 | 0.00351219 | 22.54472 | 0.070455 | 8.77  |
| 603033 | 2017 | 0.441 | 0.05 | 0.059264 | 0.00351219 | 21.04398 | 0.04988  | 38.48 |
| 300351 | 2017 | -0.28 | 0.05 | 0.059264 | 0.00351219 | 21.93608 | 0.056592 | 15.71 |
| 2532   | 2017 | -0.61 | 0.05 | 0.059264 | 0.00351219 | 21.4083  | 0.09174  | 18.61 |
| 300351 | 2017 | -0.02 | 0.05 | 0.059264 | 0.00351219 | 21.93608 | 0.056592 | 15.71 |
| 300351 | 2017 | 0.084 | 0.05 | 0.059264 | 0.00351219 | 21.93608 | 0.056592 | 15.71 |
| 300351 | 2017 | -0.32 | 0.05 | 0.059264 | 0.00351219 | 21.93608 | 0.056592 | 15.71 |
| 300351 | 2017 | -0.41 | 0.05 | 0.059264 | 0.00351219 | 21.93608 | 0.056592 | 15.71 |

|        |      |       |      |          |            |          |          |       |
|--------|------|-------|------|----------|------------|----------|----------|-------|
| 2793   | 2017 | -0.54 | 0.05 | 0.059264 | 0.00351219 | 20.61671 | 0.153612 | 37.54 |
| 2403   | 2017 | -0.7  | 0.05 | 0.059264 | 0.00351219 | 22.19005 | 0.072224 | 35.07 |
| 600267 | 2017 | 0.534 | 0.05 | 0.059264 | 0.00351219 | 23.79764 | 0.029404 | 33.22 |
| 2250   | 2017 | 0.488 | 0.05 | 0.059264 | 0.00351219 | 22.88112 | 0.036806 | 27.49 |
| 600521 | 2017 | 1.131 | 0.05 | 0.059264 | 0.00351219 | 22.83552 | 0.123367 | 26.47 |
| 300351 | 2017 | -0.41 | 0.05 | 0.059264 | 0.00351219 | 21.93608 | 0.056592 | 15.71 |
| 2021   | 2017 | -0.43 | 0.05 | 0.059264 | 0.00351219 | 21.28729 | -0.10009 | 17.45 |
| 2389   | 2017 | 0.771 | 0.05 | 0.059264 | 0.00351219 | 22.66851 | 0.031967 | 21.8  |
| 600267 | 2017 | 0.534 | 0.05 | 0.059264 | 0.00351219 | 23.79764 | 0.029404 | 33.22 |
| 2472   | 2017 | -0.26 | 0.05 | 0.059264 | 0.00351219 | 22.73646 | 0.070455 | 8.77  |
| 2332   | 2017 | 0.592 | 0.05 | 0.059264 | 0.00351219 | 22.35927 | 0.096438 | 21.55 |
| 300256 | 2017 | 0.335 | 0.05 | 0.059264 | 0.00351219 | 22.91699 | 0.019715 | 13.47 |
| 603239 | 2017 | -0.61 | 0.05 | 0.059264 | 0.00351219 | 20.90911 | 0.171234 | 47.21 |
| 2131   | 2017 | -0.56 | 0.05 | 0.059264 | 0.00351219 | 23.31435 | 0.056905 | 15.2  |
| 2664   | 2017 | -0.62 | 0.05 | 0.059264 | 0.00351219 | 21.97397 | 0.1362   | 26    |
| 603222 | 2017 | 0.284 | 0.05 | 0.059264 | 0.00351219 | 20.83592 | 0.060213 | 36.2  |
| 603996 | 2017 | -0.51 | 0.05 | 0.059264 | 0.00351219 | 22.25679 | 0.0976   | 51.16 |
| 2099   | 2017 | -0.05 | 0.05 | 0.059264 | 0.00351219 | 22.73375 | 0.06658  | 35.52 |
| 2489   | 2017 | -0.77 | 0.05 | 0.059264 | 0.00351219 | 22.8554  | 0.020987 | 37.94 |
| 2403   | 2017 | -0.46 | 0.05 | 0.059264 | 0.00351219 | 22.19005 | 0.072224 | 35.07 |
| 600521 | 2017 | 0.303 | 0.05 | 0.059264 | 0.00351219 | 22.83552 | 0.123367 | 26.47 |
| 2332   | 2017 | -0.73 | 0.05 | 0.059264 | 0.00351219 | 22.35927 | 0.096438 | 21.55 |
| 2332   | 2017 | -0.07 | 0.05 | 0.059264 | 0.00351219 | 21.9813  | 0.096438 | 21.55 |
| 2131   | 2017 | -0.66 | 0.05 | 0.059264 | 0.00351219 | 23.31435 | 0.056905 | 15.2  |
| 603085 | 2017 | -0.31 | 0.05 | 0.059264 | 0.00351219 | 21.14602 | 0.071429 | 48.25 |
| 300256 | 2017 | 0.58  | 0.05 | 0.059264 | 0.00351219 | 22.91699 | 0.019715 | 13.47 |
| 2532   | 2017 | -0.42 | 0.05 | 0.059264 | 0.00351219 | 21.4083  | 0.09174  | 18.61 |
| 2686   | 2017 | -0.56 | 0.05 | 0.059264 | 0.00351219 | 21.6727  | 0.09971  | 14.22 |
| 603996 | 2017 | 0.292 | 0.05 | 0.059264 | 0.00351219 | 22.25679 | 0.0976   | 51.16 |
| 2389   | 2017 | 0.771 | 0.05 | 0.059264 | 0.00351219 | 22.74303 | 0.031967 | 21.8  |
| 2126   | 2017 | 0.175 | 0.05 | 0.059264 | 0.00351219 | 22.36166 | 0.093061 | 10.04 |
| 600521 | 2017 | 0.288 | 0.05 | 0.059264 | 0.00351219 | 22.83552 | 0.123367 | 26.47 |
| 300351 | 2017 | -0.41 | 0.05 | 0.059264 | 0.00351219 | 21.93608 | 0.056592 | 15.71 |
| 603010 | 2017 | 0.572 | 0.05 | 0.059264 | 0.00351219 | 21.31591 | 0.082806 | 29.35 |
| 2032   | 2017 | -0.3  | 0.05 | 0.059264 | 0.00351219 | 22.93939 | 0.251582 | 74.18 |
| 600267 | 2017 | -0.15 | 0.05 | 0.059264 | 0.00351219 | 23.22291 | 0.029404 | 33.22 |
| 913    | 2017 | 0.195 | 0.05 | 0.059264 | 0.00351219 | 22.08894 | 0.031103 | 29.77 |
| 2332   | 2017 | -0.24 | 0.05 | 0.059264 | 0.00351219 | 22.35927 | 0.096438 | 21.55 |
| 2326   | 2017 | 0.766 | 0.05 | 0.059264 | 0.00351219 | 22.49207 | 0.067027 | 23.15 |
| 2489   | 2017 | -0.76 | 0.05 | 0.059264 | 0.00351219 | 22.8554  | 0.020987 | 37.94 |
| 2793   | 2017 | -0.54 | 0.05 | 0.059264 | 0.00351219 | 20.61671 | 0.153612 | 37.54 |
| 300256 | 2017 | 0.19  | 0.05 | 0.059264 | 0.00351219 | 22.91699 | 0.019715 | 13.47 |
| 2003   | 2017 | -0.26 | 0.05 | 0.059264 | 0.00351219 | 21.83277 | 0.16411  | 29.47 |
| 2472   | 2017 | -0.37 | 0.05 | 0.059264 | 0.00351219 | 22.73646 | 0.070455 | 8.77  |
| 2641   | 2017 | -0.16 | 0.05 | 0.059264 | 0.00351219 | 22.25636 | 0.071612 | 42.05 |
| 300256 | 2017 | 0.043 | 0.05 | 0.059264 | 0.00351219 | 22.91699 | 0.019715 | 13.47 |
| 603456 | 2017 | 0.783 | 0.05 | 0.059264 | 0.00351219 | 21.86829 | 0.054756 | 43.97 |
| 300256 | 2017 | 0.45  | 0.05 | 0.059264 | 0.00351219 | 22.91699 | 0.019715 | 13.47 |
| 2032   | 2017 | -0.17 | 0.05 | 0.059264 | 0.00351219 | 22.93939 | 0.251582 | 74.18 |
| 2273   | 2017 | 0.028 | 0.05 | 0.059264 | 0.00351219 | 22.36313 | 0.102188 | 19.72 |
| 2489   | 2017 | -0.82 | 0.05 | 0.059264 | 0.00351219 | 22.8554  | 0.020987 | 37.94 |
| 603222 | 2017 | 0.284 | 0.05 | 0.059264 | 0.00351219 | 21.17746 | 0.060213 | 36.2  |
| 2099   | 2017 | 0.782 | 0.05 | 0.059264 | 0.00351219 | 22.73375 | 0.06658  | 35.52 |
| 603520 | 2017 | 1.155 | 0.05 | 0.059264 | 0.00351219 | 21.42308 | 0.09333  | 21.38 |

|        |      |       |      |          |            |          |          |       |
|--------|------|-------|------|----------|------------|----------|----------|-------|
| 2032   | 2017 | -0.37 | 0.05 | 0.059264 | 0.00351219 | 22.93939 | 0.251582 | 74.18 |
| 603010 | 2017 | 0.572 | 0.05 | 0.059264 | 0.00351219 | 21.31591 | 0.082806 | 29.35 |
| 2532   | 2017 | -0.55 | 0.05 | 0.059264 | 0.00351219 | 21.4083  | 0.09174  | 18.61 |
| 2250   | 2017 | 0.458 | 0.05 | 0.059264 | 0.00351219 | 22.88112 | 0.036806 | 27.49 |
| 2250   | 2017 | 0.488 | 0.05 | 0.059264 | 0.00351219 | 22.88112 | 0.036806 | 27.49 |
| 600267 | 2017 | 0.931 | 0.05 | 0.059264 | 0.00351219 | 23.79764 | 0.029404 | 33.22 |
| 2686   | 2017 | -0.56 | 0.05 | 0.059264 | 0.00351219 | 21.27469 | 0.09971  | 14.22 |
| 2372   | 2017 | -0.44 | 0.05 | 0.059264 | 0.00351219 | 21.98749 | 0.25572  | 36.46 |
| 2372   | 2017 | -0.4  | 0.05 | 0.059264 | 0.00351219 | 22.15785 | 0.25572  | 36.46 |
| 2641   | 2017 | -0.53 | 0.05 | 0.059264 | 0.00351219 | 22.25636 | 0.071612 | 42.05 |
| 2489   | 2017 | -0.76 | 0.05 | 0.059264 | 0.00351219 | 22.83581 | 0.020987 | 37.94 |
| 2332   | 2017 | -0.07 | 0.05 | 0.059264 | 0.00351219 | 22.35927 | 0.096438 | 21.55 |
| 603520 | 2017 | 1.155 | 0.05 | 0.059264 | 0.00351219 | 21.0794  | 0.09333  | 21.38 |
| 600521 | 2017 | 0.204 | 0.05 | 0.059264 | 0.00351219 | 22.83552 | 0.123367 | 26.47 |
| 2641   | 2017 | -0.15 | 0.05 | 0.059264 | 0.00351219 | 22.25636 | 0.071612 | 42.05 |
| 2126   | 2017 | 0.041 | 0.05 | 0.059264 | 0.00351219 | 22.6221  | 0.093061 | 10.04 |
| 2250   | 2017 | 0.488 | 0.05 | 0.059264 | 0.00351219 | 22.88112 | 0.036806 | 27.49 |
| 2099   | 2017 | 0.488 | 0.05 | 0.059264 | 0.00351219 | 22.73375 | 0.06658  | 35.52 |
| 600521 | 2017 | 0.204 | 0.05 | 0.059264 | 0.00351219 | 22.83552 | 0.123367 | 26.47 |
| 2532   | 2017 | -0.19 | 0.05 | 0.059264 | 0.00351219 | 21.4083  | 0.09174  | 18.61 |
| 2686   | 2017 | 0.325 | 0.05 | 0.059264 | 0.00351219 | 21.6727  | 0.09971  | 14.22 |
| 603222 | 2017 | 0.284 | 0.05 | 0.059264 | 0.00351219 | 21.17746 | 0.060213 | 36.2  |
| 2389   | 2017 | 0.655 | 0.05 | 0.059264 | 0.00351219 | 22.74303 | 0.031967 | 21.8  |
| 2686   | 2017 | -0.56 | 0.05 | 0.059264 | 0.00351219 | 21.6727  | 0.09971  | 14.22 |
| 2641   | 2017 | -0.41 | 0.05 | 0.059264 | 0.00351219 | 22.25636 | 0.071612 | 42.05 |
| 2126   | 2017 | -0.56 | 0.05 | 0.059264 | 0.00351219 | 22.6221  | 0.093061 | 10.04 |
| 300351 | 2017 | -0.41 | 0.05 | 0.059264 | 0.00351219 | 21.67161 | 0.056592 | 15.71 |
| 2532   | 2017 | -0.61 | 0.05 | 0.059264 | 0.00351219 | 21.4083  | 0.09174  | 18.61 |
| 603085 | 2017 | -0.31 | 0.05 | 0.059264 | 0.00351219 | 21.14602 | 0.071429 | 48.25 |
| 2686   | 2017 | -0.56 | 0.05 | 0.059264 | 0.00351219 | 21.6727  | 0.09971  | 14.22 |
| 603456 | 2017 | 0.783 | 0.05 | 0.059264 | 0.00351219 | 21.86829 | 0.054756 | 43.97 |
| 2326   | 2017 | 0.766 | 0.05 | 0.059264 | 0.00351219 | 22.49207 | 0.067027 | 23.15 |
| 2131   | 2017 | -0.78 | 0.05 | 0.059264 | 0.00351219 | 23.31435 | 0.056905 | 15.2  |
| 913    | 2017 | 0.055 | 0.05 | 0.059264 | 0.00351219 | 22.08894 | 0.031103 | 29.77 |
| 2532   | 2017 | -0.55 | 0.05 | 0.059264 | 0.00351219 | 21.4083  | 0.09174  | 18.61 |
| 2326   | 2017 | 0.766 | 0.05 | 0.059264 | 0.00351219 | 22.49207 | 0.067027 | 23.15 |
| 2131   | 2017 | -0.56 | 0.05 | 0.059264 | 0.00351219 | 23.31435 | 0.056905 | 15.2  |
| 2099   | 2017 | 0.488 | 0.05 | 0.059264 | 0.00351219 | 22.73375 | 0.06658  | 35.52 |
| 2021   | 2017 | -0.43 | 0.05 | 0.059264 | 0.00351219 | 21.28729 | -0.10009 | 17.45 |
| 2273   | 2017 | 0.028 | 0.05 | 0.059264 | 0.00351219 | 22.36313 | 0.102188 | 19.72 |
| 2472   | 2017 | -0.7  | 0.05 | 0.059264 | 0.00351219 | 22.73646 | 0.070455 | 8.77  |
| 2332   | 2017 | -0.3  | 0.05 | 0.059264 | 0.00351219 | 22.35927 | 0.096438 | 21.55 |
| 2403   | 2017 | -0.6  | 0.05 | 0.059264 | 0.00351219 | 22.19005 | 0.072224 | 35.07 |
| 600521 | 2017 | 0.138 | 0.05 | 0.059264 | 0.00351219 | 22.83552 | 0.123367 | 26.47 |
| 600521 | 2017 | -0.06 | 0.05 | 0.059264 | 0.00351219 | 22.68688 | 0.123367 | 26.47 |
| 600521 | 2017 | 0.245 | 0.05 | 0.059264 | 0.00351219 | 22.83552 | 0.123367 | 26.47 |
| 600267 | 2017 | 0.534 | 0.05 | 0.059264 | 0.00351219 | 23.79764 | 0.029404 | 33.22 |
| 600267 | 2017 | -0.15 | 0.05 | 0.059264 | 0.00351219 | 23.79764 | 0.029404 | 33.22 |
| 2131   | 2017 | -0.78 | 0.05 | 0.059264 | 0.00351219 | 23.31435 | 0.056905 | 15.2  |
| 2131   | 2017 | -0.58 | 0.05 | 0.059264 | 0.00351219 | 23.31435 | 0.056905 | 15.2  |
| 2273   | 2017 | -0.55 | 0.05 | 0.059264 | 0.00351219 | 22.36313 | 0.102188 | 19.72 |
| 2131   | 2017 | -0.59 | 0.05 | 0.059264 | 0.00351219 | 22.86456 | 0.056905 | 15.2  |
| 2131   | 2017 | -0.66 | 0.05 | 0.059264 | 0.00351219 | 23.31435 | 0.056905 | 15.2  |
| 2126   | 2017 | -0.56 | 0.05 | 0.059264 | 0.00351219 | 22.6221  | 0.093061 | 10.04 |

|        |      |       |      |          |            |          |          |       |
|--------|------|-------|------|----------|------------|----------|----------|-------|
| 2403   | 2017 | -0.64 | 0.05 | 0.059264 | 0.00351219 | 22.19005 | 0.072224 | 35.07 |
| 2126   | 2017 | -0.13 | 0.05 | 0.059264 | 0.00351219 | 22.6221  | 0.093061 | 10.04 |
| 2126   | 2017 | -0.37 | 0.05 | 0.059264 | 0.00351219 | 22.6221  | 0.093061 | 10.04 |
| 2126   | 2017 | -0.56 | 0.05 | 0.059264 | 0.00351219 | 22.6221  | 0.093061 | 10.04 |
| 2126   | 2017 | -0.56 | 0.05 | 0.059264 | 0.00351219 | 22.6221  | 0.093061 | 10.04 |
| 2403   | 2017 | -0.66 | 0.05 | 0.059264 | 0.00351219 | 22.19005 | 0.072224 | 35.07 |
| 2489   | 2017 | -0.82 | 0.05 | 0.059264 | 0.00351219 | 22.8554  | 0.020987 | 37.94 |
| 2032   | 2017 | -0.17 | 0.05 | 0.059264 | 0.00351219 | 22.93939 | 0.251582 | 74.18 |
| 600267 | 2017 | 0.062 | 0.05 | 0.059264 | 0.00351219 | 23.79764 | 0.029404 | 33.22 |
| 913    | 2017 | -0.44 | 0.05 | 0.059264 | 0.00351219 | 22.08894 | 0.031103 | 29.77 |
| 2021   | 2017 | -0.43 | 0.05 | 0.059264 | 0.00351219 | 21.28729 | -0.10009 | 17.45 |
| 603222 | 2017 | 0.284 | 0.05 | 0.059264 | 0.00351219 | 21.17746 | 0.060213 | 36.2  |
| 2003   | 2017 | -0.26 | 0.05 | 0.059264 | 0.00351219 | 21.83277 | 0.16411  | 29.47 |
| 2112   | 2017 | 0.927 | 0.05 | 0.059264 | 0.00351219 | 20.87907 | -0.32925 | 14.77 |
| 2099   | 2017 | 0.782 | 0.05 | 0.059264 | 0.00351219 | 22.73375 | 0.06658  | 35.52 |
| 2099   | 2017 | 0.488 | 0.05 | 0.059264 | 0.00351219 | 22.73375 | 0.06658  | 35.52 |
| 2664   | 2017 | -0.29 | 0.05 | 0.059264 | 0.00351219 | 21.80231 | 0.1362   | 26    |
| 2795   | 2017 | -0.7  | 0.05 | 0.059264 | 0.00351219 | 20.44989 | 0.094087 | 38.25 |
| 2664   | 2017 | 0.042 | 0.05 | 0.059264 | 0.00351219 | 21.97397 | 0.1362   | 26    |
| 2372   | 2017 | -0.14 | 0.05 | 0.059264 | 0.00351219 | 22.15785 | 0.25572  | 36.46 |
| 2389   | 2017 | 0.587 | 0.05 | 0.059264 | 0.00351219 | 22.74303 | 0.031967 | 21.8  |
| 300351 | 2017 | 0.155 | 0.05 | 0.059264 | 0.00351219 | 21.93608 | 0.056592 | 15.71 |
| 300351 | 2017 | -0.21 | 0.05 | 0.059264 | 0.00351219 | 21.93608 | 0.056592 | 15.71 |
| 2112   | 2017 | 0.927 | 0.05 | 0.059264 | 0.00351219 | 20.87907 | -0.32925 | 14.77 |
| 2021   | 2017 | -0.43 | 0.05 | 0.059264 | 0.00351219 | 21.28729 | -0.10009 | 17.45 |
| 2021   | 2017 | -0.43 | 0.05 | 0.059264 | 0.00351219 | 21.28729 | -0.10009 | 17.45 |
| 2021   | 2017 | -0.43 | 0.05 | 0.059264 | 0.00351219 | 21.04037 | -0.10009 | 17.45 |
| 300351 | 2017 | -0.41 | 0.05 | 0.059264 | 0.00351219 | 21.93608 | 0.056592 | 15.71 |
| 600267 | 2017 | -0.39 | 0.05 | 0.059264 | 0.00351219 | 23.79764 | 0.029404 | 33.22 |
| 2532   | 2017 | -0.61 | 0.05 | 0.059264 | 0.00351219 | 21.32539 | 0.09174  | 18.61 |
| 2250   | 2017 | 0.488 | 0.05 | 0.059264 | 0.00351219 | 22.88112 | 0.036806 | 27.49 |
| 2372   | 2017 | -0.26 | 0.05 | 0.059264 | 0.00351219 | 22.15785 | 0.25572  | 36.46 |
| 603456 | 2017 | 0.783 | 0.05 | 0.059264 | 0.00351219 | 21.86829 | 0.054756 | 43.97 |
| 2389   | 2017 | 0.788 | 0.05 | 0.059264 | 0.00351219 | 22.74303 | 0.031967 | 21.8  |
| 600512 | 2017 | 0.154 | 0.05 | 0.059264 | 0.00351219 | 23.12172 | 0.028558 | 8.26  |
| 2032   | 2017 | -0.55 | 0.05 | 0.059264 | 0.00351219 | 22.93939 | 0.251582 | 74.18 |
| 913    | 2017 | -0.44 | 0.05 | 0.059264 | 0.00351219 | 22.08894 | 0.031103 | 29.77 |
| 2389   | 2017 | 0.688 | 0.05 | 0.059264 | 0.00351219 | 22.74303 | 0.031967 | 21.8  |
| 2032   | 2017 | -0.37 | 0.05 | 0.059264 | 0.00351219 | 22.93939 | 0.251582 | 74.18 |
| 2099   | 2017 | 0.782 | 0.05 | 0.059264 | 0.00351219 | 22.73375 | 0.06658  | 35.52 |
| 600521 | 2017 | 1.131 | 0.05 | 0.059264 | 0.00351219 | 22.83552 | 0.123367 | 26.47 |
| 603996 | 2017 | -0.51 | 0.05 | 0.059264 | 0.00351219 | 22.25679 | 0.0976   | 51.16 |
| 2032   | 2017 | -0.55 | 0.05 | 0.059264 | 0.00351219 | 22.93939 | 0.251582 | 74.18 |
| 2003   | 2017 | -0.63 | 0.05 | 0.059264 | 0.00351219 | 21.83277 | 0.16411  | 29.47 |
| 2489   | 2017 | -0.82 | 0.05 | 0.059264 | 0.00351219 | 22.8554  | 0.020987 | 37.94 |
| 2372   | 2017 | -0.44 | 0.05 | 0.059264 | 0.00351219 | 22.15785 | 0.25572  | 36.46 |
| 2250   | 2017 | 0.09  | 0.05 | 0.059264 | 0.00351219 | 22.53798 | 0.036806 | 27.49 |
| 2472   | 2017 | -0.26 | 0.05 | 0.059264 | 0.00351219 | 22.54472 | 0.070455 | 8.77  |
| 2686   | 2017 | 0.325 | 0.05 | 0.059264 | 0.00351219 | 21.6727  | 0.09971  | 14.22 |
| 2795   | 2017 | -0.7  | 0.05 | 0.059264 | 0.00351219 | 20.44989 | 0.094087 | 38.25 |
| 2472   | 2017 | -0.37 | 0.05 | 0.059264 | 0.00351219 | 22.73646 | 0.070455 | 8.77  |
| 603085 | 2017 | -0.31 | 0.05 | 0.059264 | 0.00351219 | 21.15027 | 0.071429 | 48.25 |
| 2326   | 2017 | 0.766 | 0.05 | 0.059264 | 0.00351219 | 22.49207 | 0.067027 | 23.15 |
| 2532   | 2017 | -0.19 | 0.05 | 0.059264 | 0.00351219 | 21.4083  | 0.09174  | 18.61 |

|        |      |       |      |          |            |          |          |       |
|--------|------|-------|------|----------|------------|----------|----------|-------|
| 2532   | 2017 | -0.61 | 0.05 | 0.059264 | 0.00351219 | 21.4083  | 0.09174  | 18.61 |
| 2273   | 2017 | -0.31 | 0.05 | 0.059264 | 0.00351219 | 22.36313 | 0.102188 | 19.72 |
| 2250   | 2017 | 0.753 | 0.05 | 0.059264 | 0.00351219 | 22.88112 | 0.036806 | 27.49 |
| 2641   | 2017 | -0.22 | 0.05 | 0.059264 | 0.00351219 | 22.25636 | 0.071612 | 42.05 |
| 2332   | 2017 | -0.63 | 0.05 | 0.059264 | 0.00351219 | 22.35927 | 0.096438 | 21.55 |
| 2032   | 2017 | -0.55 | 0.05 | 0.059264 | 0.00351219 | 22.93939 | 0.251582 | 74.18 |
| 913    | 2017 | -0.23 | 0.05 | 0.059264 | 0.00351219 | 22.08894 | 0.031103 | 29.77 |
| 2532   | 2017 | -0.33 | 0.05 | 0.059264 | 0.00351219 | 21.4083  | 0.09174  | 18.61 |
| 2326   | 2017 | 0.766 | 0.05 | 0.059264 | 0.00351219 | 22.49207 | 0.067027 | 23.15 |
| 603996 | 2017 | 0.292 | 0.05 | 0.059264 | 0.00351219 | 22.20361 | 0.0976   | 51.16 |
| 2021   | 2017 | -0.43 | 0.05 | 0.059264 | 0.00351219 | 21.28729 | -0.10009 | 17.45 |
| 603222 | 2017 | 0.284 | 0.05 | 0.059264 | 0.00351219 | 21.17746 | 0.060213 | 36.2  |
| 2003   | 2017 | 0.472 | 0.05 | 0.059264 | 0.00351219 | 21.6142  | 0.16411  | 29.47 |
| 2250   | 2017 | 0.488 | 0.05 | 0.059264 | 0.00351219 | 22.88112 | 0.036806 | 27.49 |
| 2793   | 2017 | -0.54 | 0.05 | 0.059264 | 0.00351219 | 20.62202 | 0.153612 | 37.54 |
| 2099   | 2017 | -0.05 | 0.05 | 0.059264 | 0.00351219 | 22.73375 | 0.06658  | 35.52 |
| 2641   | 2017 | -0.09 | 0.05 | 0.059264 | 0.00351219 | 22.25636 | 0.071612 | 42.05 |
| 2372   | 2017 | -0.04 | 0.05 | 0.059264 | 0.00351219 | 22.15785 | 0.25572  | 36.46 |
| 2003   | 2017 | 0.03  | 0.05 | 0.059264 | 0.00351219 | 21.83277 | 0.16411  | 29.47 |
| 2641   | 2017 | -0.09 | 0.05 | 0.059264 | 0.00351219 | 22.25636 | 0.071612 | 42.05 |
| 2099   | 2017 | 0.782 | 0.05 | 0.059264 | 0.00351219 | 22.73375 | 0.06658  | 35.52 |
| 2686   | 2017 | -0.37 | 0.05 | 0.059264 | 0.00351219 | 21.6727  | 0.09971  | 14.22 |
| 2795   | 2017 | -0.7  | 0.05 | 0.059264 | 0.00351219 | 20.44989 | 0.094087 | 38.25 |
| 2326   | 2017 | 0.766 | 0.05 | 0.059264 | 0.00351219 | 22.49207 | 0.067027 | 23.15 |
| 2126   | 2017 | -0.56 | 0.05 | 0.059264 | 0.00351219 | 22.6221  | 0.093061 | 10.04 |
| 2021   | 2017 | -0.43 | 0.05 | 0.059264 | 0.00351219 | 21.28729 | -0.10009 | 17.45 |
| 2250   | 2017 | 0.753 | 0.05 | 0.059264 | 0.00351219 | 22.88112 | 0.036806 | 27.49 |
| 600512 | 2017 | 0.154 | 0.05 | 0.059264 | 0.00351219 | 22.90609 | 0.028558 | 8.26  |
| 603456 | 2017 | 0.783 | 0.05 | 0.059264 | 0.00351219 | 21.86829 | 0.054756 | 43.97 |
| 603520 | 2017 | 1.155 | 0.05 | 0.059264 | 0.00351219 | 21.42308 | 0.09333  | 21.38 |
| 2641   | 2017 | -0.41 | 0.05 | 0.059264 | 0.00351219 | 22.25636 | 0.071612 | 42.05 |
| 2003   | 2017 | 0.225 | 0.05 | 0.059264 | 0.00351219 | 21.83277 | 0.16411  | 29.47 |
| 2332   | 2017 | -0.73 | 0.05 | 0.059264 | 0.00351219 | 22.35927 | 0.096438 | 21.55 |
| 2332   | 2017 | 0.592 | 0.05 | 0.059264 | 0.00351219 | 22.35927 | 0.096438 | 21.55 |
| 603520 | 2017 | 1.155 | 0.05 | 0.059264 | 0.00351219 | 21.42308 | 0.09333  | 21.38 |
| 2795   | 2017 | -0.7  | 0.05 | 0.059264 | 0.00351219 | 20.37329 | 0.094087 | 38.25 |
| 2725   | 2017 | -0.64 | 0.05 | 0.059264 | 0.00351219 | 20.8353  | 0.017523 | 12.56 |
| 2403   | 2017 | -0.35 | 0.05 | 0.059264 | 0.00351219 | 22.19005 | 0.072224 | 35.07 |
| 2403   | 2017 | -0.64 | 0.05 | 0.059264 | 0.00351219 | 22.19005 | 0.072224 | 35.07 |
| 2326   | 2017 | 0.766 | 0.05 | 0.059264 | 0.00351219 | 22.49207 | 0.067027 | 23.15 |
| 2641   | 2017 | -0.65 | 0.05 | 0.059264 | 0.00351219 | 22.17212 | 0.071612 | 42.05 |
| 2326   | 2017 | 0.766 | 0.05 | 0.059264 | 0.00351219 | 22.49207 | 0.067027 | 23.15 |
| 913    | 2017 | 0.333 | 0.05 | 0.059264 | 0.00351219 | 22.08894 | 0.031103 | 29.77 |
| 600418 | 2017 | 0.243 | 0.04 | 1.54807  | 2.3965195  | 24.51899 | 0.015564 | 23.55 |
| 600761 | 2017 | -0.33 | 0.04 | 1.54807  | 2.3965195  | 22.68208 | 0.108346 | 37.97 |
| 300274 | 2017 | 0.439 | 0.04 | 1.54807  | 2.3965195  | 23.51124 | 0.144426 | 31.14 |
| 600418 | 2017 | -0.4  | 0.04 | 1.54807  | 2.3965195  | 24.51899 | 0.015564 | 23.55 |
| 2556   | 2017 | -0.22 | 0.04 | 1.54807  | 2.3965195  | 22.75965 | 0.060665 | 40.56 |
| 600418 | 2017 | -0.35 | 0.04 | 1.54807  | 2.3965195  | 24.51899 | 0.015564 | 23.55 |
| 603308 | 2017 | 1.613 | 0.04 | 1.54807  | 2.3965195  | 22.6379  | 0.019519 | 30.6  |
| 600418 | 2017 | 0.057 | 0.04 | 1.54807  | 2.3965195  | 24.51899 | 0.015564 | 23.55 |
| 868    | 2017 | -0.69 | 0.04 | 1.54807  | 2.3965195  | 22.80006 | -0.24253 | 21.13 |
| 2743   | 2017 | -0.41 | 0.04 | 1.54807  | 2.3965195  | 22.43156 | 0.035472 | 37.96 |
| 300218 | 2017 | -0.04 | 0.04 | 1.54807  | 2.3965195  | 21.39123 | -0.01444 | 21.9  |

|        |      |       |      |         |           |          |          |       |
|--------|------|-------|------|---------|-----------|----------|----------|-------|
| 600418 | 2017 | -0.41 | 0.04 | 1.54807 | 2.3965195 | 24.51899 | 0.015564 | 23.55 |
| 603011 | 2017 | 0.484 | 0.04 | 1.54807 | 2.3965195 | 21.51173 | 0.024831 | 33.01 |
| 2140   | 2017 | 0.407 | 0.04 | 1.54807 | 2.3965195 | 22.54157 | -0.03111 | 58.33 |
| 713    | 2017 | 0.675 | 0.04 | 1.54807 | 2.3965195 | 21.5085  | 0.01061  | 34.11 |
| 521    | 2017 | -0.31 | 0.04 | 1.54807 | 2.3965195 | 23.49345 | 0.006999 | 22.47 |
| 2230   | 2017 | 1.723 | 0.04 | 1.54807 | 2.3965195 | 23.31406 | 0.060255 | 12.9  |
| 600418 | 2017 | -0.35 | 0.04 | 1.54807 | 2.3965195 | 24.51899 | 0.015564 | 23.55 |
| 300274 | 2017 | 0.434 | 0.04 | 1.54807 | 2.3965195 | 23.51124 | 0.144426 | 31.14 |
| 300274 | 2017 | 0.143 | 0.04 | 1.54807 | 2.3965195 | 23.45976 | 0.144426 | 31.14 |
| 603308 | 2017 | 1.313 | 0.04 | 1.54807 | 2.3965195 | 22.6379  | 0.019519 | 30.6  |
| 600551 | 2017 | 0.455 | 0.04 | 1.54807 | 2.3965195 | 22.40843 | 0.062964 | 56.79 |
| 521    | 2017 | -0.29 | 0.04 | 1.54807 | 2.3965195 | 23.18615 | 0.006999 | 22.47 |
| 2230   | 2017 | 2.495 | 0.04 | 1.54807 | 2.3965195 | 23.31406 | 0.060255 | 12.9  |
| 600551 | 2017 | 0.455 | 0.04 | 1.54807 | 2.3965195 | 22.63153 | 0.062964 | 56.79 |
| 603011 | 2017 | 0.484 | 0.04 | 1.54807 | 2.3965195 | 21.51173 | 0.024831 | 33.01 |
| 300009 | 2017 | 1.27  | 0.04 | 1.54807 | 2.3965195 | 21.53604 | 0.160067 | 27.93 |
| 300009 | 2017 | 1.27  | 0.04 | 1.54807 | 2.3965195 | 21.53604 | 0.160067 | 27.93 |
| 600551 | 2017 | 0.455 | 0.04 | 1.54807 | 2.3965195 | 22.63153 | 0.062964 | 56.79 |
| 300388 | 2017 | 0.534 | 0.04 | 1.54807 | 2.3965195 | 22.81499 | 0.093678 | 37.58 |
| 300009 | 2017 | 0.976 | 0.04 | 1.54807 | 2.3965195 | 21.53604 | 0.160067 | 27.93 |
| 2557   | 2017 | -0.17 | 0.04 | 1.54807 | 2.3965195 | 22.26526 | 0.10272  | 49.95 |
| 600418 | 2017 | 0.811 | 0.04 | 1.54807 | 2.3965195 | 24.51899 | 0.015564 | 23.55 |
| 600063 | 2017 | 0.365 | 0.04 | 1.54807 | 2.3965195 | 22.90501 | 0.017672 | 30.74 |
| 300520 | 2017 | 2.104 | 0.04 | 1.54807 | 2.3965195 | 20.82789 | 0.033752 | 34.01 |
| 300218 | 2017 | -0.15 | 0.04 | 1.54807 | 2.3965195 | 21.30853 | -0.01444 | 21.9  |
| 2230   | 2017 | 2.495 | 0.04 | 1.54807 | 2.3965195 | 23.31406 | 0.060255 | 12.9  |
| 859    | 2017 | 0.579 | 0.04 | 1.54807 | 2.3965195 | 21.48729 | 0.028148 | 25.11 |
| 2331   | 2017 | 0.938 | 0.04 | 1.54807 | 2.3965195 | 21.17795 | 0.064083 | 7.84  |
| 300388 | 2017 | -0.79 | 0.04 | 1.54807 | 2.3965195 | 22.81499 | 0.093678 | 37.58 |
| 600418 | 2017 | -0.29 | 0.04 | 1.54807 | 2.3965195 | 24.51899 | 0.015564 | 23.55 |
| 2230   | 2017 | 1.464 | 0.04 | 1.54807 | 2.3965195 | 23.31406 | 0.060255 | 12.9  |
| 600983 | 2017 | -0.18 | 0.04 | 1.54807 | 2.3965195 | 22.86069 | -0.02492 | 51    |
| 300009 | 2017 | 1.27  | 0.04 | 1.54807 | 2.3965195 | 21.53604 | 0.160067 | 27.93 |
| 300009 | 2017 | 1.27  | 0.04 | 1.54807 | 2.3965195 | 21.53604 | 0.160067 | 27.93 |
| 868    | 2017 | -0.3  | 0.04 | 1.54807 | 2.3965195 | 22.80006 | -0.24253 | 21.13 |
| 300009 | 2017 | 0.976 | 0.04 | 1.54807 | 2.3965195 | 21.33686 | 0.160067 | 27.93 |
| 300009 | 2017 | 1.27  | 0.04 | 1.54807 | 2.3965195 | 21.53604 | 0.160067 | 27.93 |
| 300009 | 2017 | 0.976 | 0.04 | 1.54807 | 2.3965195 | 21.53604 | 0.160067 | 27.93 |
| 600063 | 2017 | 0.365 | 0.04 | 1.54807 | 2.3965195 | 22.90501 | 0.017672 | 30.74 |
| 2690   | 2017 | 0.3   | 0.04 | 1.54807 | 2.3965195 | 21.73223 | 0.165386 | 61.45 |
| 2230   | 2017 | 2.495 | 0.04 | 1.54807 | 2.3965195 | 23.31406 | 0.060255 | 12.9  |
| 859    | 2017 | 0.447 | 0.04 | 1.54807 | 2.3965195 | 21.48729 | 0.028148 | 25.11 |
| 300388 | 2017 | -0.79 | 0.04 | 1.54807 | 2.3965195 | 22.81499 | 0.093678 | 37.58 |
| 2556   | 2017 | 0.367 | 0.04 | 1.54807 | 2.3965195 | 22.75965 | 0.060665 | 40.56 |
| 2230   | 2017 | 2.495 | 0.04 | 1.54807 | 2.3965195 | 23.31406 | 0.060255 | 12.9  |
| 2556   | 2017 | -0.96 | 0.04 | 1.54807 | 2.3965195 | 22.75965 | 0.060665 | 40.56 |
| 600418 | 2017 | -0.29 | 0.04 | 1.54807 | 2.3965195 | 24.51899 | 0.015564 | 23.55 |
| 600444 | 2017 | 0.597 | 0.04 | 1.54807 | 2.3965195 | 20.53398 | 0.302158 | 36.82 |
| 300388 | 2017 | -0.28 | 0.04 | 1.54807 | 2.3965195 | 22.81499 | 0.093678 | 37.58 |
| 600418 | 2017 | -0.25 | 0.04 | 1.54807 | 2.3965195 | 24.51899 | 0.015564 | 23.55 |
| 2690   | 2017 | 0.3   | 0.04 | 1.54807 | 2.3965195 | 21.73223 | 0.165386 | 61.45 |
| 300087 | 2017 | 0.968 | 0.04 | 1.54807 | 2.3965195 | 21.18546 | 0.099638 | 10.72 |
| 300247 | 2017 | -0.47 | 0.04 | 1.54807 | 2.3965195 | 21.81844 | 0.027653 | 14.44 |
| 300247 | 2017 | 0.353 | 0.04 | 1.54807 | 2.3965195 | 21.81844 | 0.027653 | 14.44 |

|        |      |       |      |         |           |          |          |       |
|--------|------|-------|------|---------|-----------|----------|----------|-------|
| 300247 | 2017 | 0.794 | 0.04 | 1.54807 | 2.3965195 | 21.81844 | 0.027653 | 14.44 |
| 2230   | 2017 | 2.495 | 0.04 | 1.54807 | 2.3965195 | 23.31406 | 0.060255 | 12.9  |
| 600444 | 2017 | 1.015 | 0.04 | 1.54807 | 2.3965195 | 20.53398 | 0.302158 | 36.82 |
| 300247 | 2017 | -0.27 | 0.04 | 1.54807 | 2.3965195 | 21.67674 | 0.027653 | 14.44 |
| 600418 | 2017 | -0.08 | 0.04 | 1.54807 | 2.3965195 | 24.51899 | 0.015564 | 23.55 |
| 600990 | 2017 | 0.626 | 0.04 | 1.54807 | 2.3965195 | 22.29879 | 0.094639 | 45.67 |
| 2140   | 2017 | -0.53 | 0.04 | 1.54807 | 2.3965195 | 22.45937 | -0.03111 | 58.33 |
| 2556   | 2017 | -0.33 | 0.04 | 1.54807 | 2.3965195 | 22.75965 | 0.060665 | 40.56 |
| 600444 | 2017 | -0.12 | 0.04 | 1.54807 | 2.3965195 | 20.13401 | 0.302158 | 36.82 |
| 521    | 2017 | -0.16 | 0.04 | 1.54807 | 2.3965195 | 23.49345 | 0.006999 | 22.47 |
| 300009 | 2017 | 1.27  | 0.04 | 1.54807 | 2.3965195 | 21.53604 | 0.160067 | 27.93 |
| 2690   | 2017 | 0.3   | 0.04 | 1.54807 | 2.3965195 | 21.73705 | 0.165386 | 61.45 |
| 603308 | 2017 | 1.203 | 0.04 | 1.54807 | 2.3965195 | 22.6379  | 0.019519 | 30.6  |
| 600551 | 2017 | 0.455 | 0.04 | 1.54807 | 2.3965195 | 22.63153 | 0.062964 | 56.79 |
| 2557   | 2017 | -0.17 | 0.04 | 1.54807 | 2.3965195 | 22.23658 | 0.10272  | 49.95 |
| 600418 | 2017 | -0.37 | 0.04 | 1.54807 | 2.3965195 | 24.51899 | 0.015564 | 23.55 |
| 300520 | 2017 | 2.104 | 0.04 | 1.54807 | 2.3965195 | 20.95702 | 0.033752 | 34.01 |
| 600418 | 2017 | -0.51 | 0.04 | 1.54807 | 2.3965195 | 24.51899 | 0.015564 | 23.55 |
| 600418 | 2017 | 0.039 | 0.04 | 1.54807 | 2.3965195 | 24.51899 | 0.015564 | 23.55 |
| 2230   | 2017 | 1.732 | 0.04 | 1.54807 | 2.3965195 | 23.31406 | 0.060255 | 12.9  |
| 300218 | 2017 | 0.546 | 0.04 | 1.54807 | 2.3965195 | 21.39123 | -0.01444 | 21.9  |
| 713    | 2017 | 0.675 | 0.04 | 1.54807 | 2.3965195 | 21.5085  | 0.01061  | 34.11 |
| 600063 | 2017 | 0.365 | 0.04 | 1.54807 | 2.3965195 | 22.843   | 0.017672 | 30.74 |
| 300247 | 2017 | 0.573 | 0.04 | 1.54807 | 2.3965195 | 21.81844 | 0.027653 | 14.44 |
| 2557   | 2017 | 0.138 | 0.04 | 1.54807 | 2.3965195 | 22.26526 | 0.10272  | 49.95 |
| 868    | 2017 | -0.69 | 0.04 | 1.54807 | 2.3965195 | 22.80006 | -0.24253 | 21.13 |
| 2541   | 2017 | -0.7  | 0.04 | 1.54807 | 2.3965195 | 22.53294 | 0.051988 | 37.03 |
| 600551 | 2017 | 0.214 | 0.04 | 1.54807 | 2.3965195 | 22.63153 | 0.062964 | 56.79 |
| 300247 | 2017 | 0.794 | 0.04 | 1.54807 | 2.3965195 | 21.81844 | 0.027653 | 14.44 |
| 600983 | 2017 | -0.18 | 0.04 | 1.54807 | 2.3965195 | 22.86069 | -0.02492 | 51    |
| 2541   | 2017 | -0.7  | 0.04 | 1.54807 | 2.3965195 | 22.86648 | 0.051988 | 37.03 |
| 859    | 2017 | 0.074 | 0.04 | 1.54807 | 2.3965195 | 21.48729 | 0.028148 | 25.11 |
| 2230   | 2017 | 1.17  | 0.04 | 1.54807 | 2.3965195 | 23.31406 | 0.060255 | 12.9  |
| 2743   | 2017 | -0.38 | 0.04 | 1.54807 | 2.3965195 | 22.51261 | 0.035472 | 37.96 |
| 600063 | 2017 | 0.365 | 0.04 | 1.54807 | 2.3965195 | 22.90501 | 0.017672 | 30.74 |
| 300087 | 2017 | 0.968 | 0.04 | 1.54807 | 2.3965195 | 21.18546 | 0.099638 | 10.72 |
| 300274 | 2017 | 0.439 | 0.04 | 1.54807 | 2.3965195 | 23.51124 | 0.144426 | 31.14 |
| 600418 | 2017 | 0.03  | 0.04 | 1.54807 | 2.3965195 | 24.51899 | 0.015564 | 23.55 |
| 600418 | 2017 | -0.25 | 0.04 | 1.54807 | 2.3965195 | 24.51899 | 0.015564 | 23.55 |
| 300388 | 2017 | -0.63 | 0.04 | 1.54807 | 2.3965195 | 22.81499 | 0.093678 | 37.58 |
| 2743   | 2017 | -0.49 | 0.04 | 1.54807 | 2.3965195 | 22.51261 | 0.035472 | 37.96 |
| 2230   | 2017 | 2.495 | 0.04 | 1.54807 | 2.3965195 | 23.31406 | 0.060255 | 12.9  |
| 600418 | 2017 | 0.811 | 0.04 | 1.54807 | 2.3965195 | 24.51899 | 0.015564 | 23.55 |
| 2140   | 2017 | -0.53 | 0.04 | 1.54807 | 2.3965195 | 22.54157 | -0.03111 | 58.33 |
| 2230   | 2017 | 1.17  | 0.04 | 1.54807 | 2.3965195 | 23.31406 | 0.060255 | 12.9  |
| 2230   | 2017 | 2.495 | 0.04 | 1.54807 | 2.3965195 | 23.31406 | 0.060255 | 12.9  |
| 600063 | 2017 | 0.365 | 0.04 | 1.54807 | 2.3965195 | 22.90501 | 0.017672 | 30.74 |
| 600418 | 2017 | 0.039 | 0.04 | 1.54807 | 2.3965195 | 24.51899 | 0.015564 | 23.55 |
| 600990 | 2017 | 0.184 | 0.04 | 1.54807 | 2.3965195 | 22.5876  | 0.094639 | 45.67 |
| 300009 | 2017 | 1.27  | 0.04 | 1.54807 | 2.3965195 | 21.53604 | 0.160067 | 27.93 |
| 600990 | 2017 | 0.528 | 0.04 | 1.54807 | 2.3965195 | 22.5876  | 0.094639 | 45.67 |
| 300247 | 2017 | 0.794 | 0.04 | 1.54807 | 2.3965195 | 21.81844 | 0.027653 | 14.44 |
| 300388 | 2017 | -0.51 | 0.04 | 1.54807 | 2.3965195 | 22.81499 | 0.093678 | 37.58 |
| 300009 | 2017 | 0.976 | 0.04 | 1.54807 | 2.3965195 | 21.53604 | 0.160067 | 27.93 |

|        |      |       |      |         |           |          |          |       |
|--------|------|-------|------|---------|-----------|----------|----------|-------|
| 300009 | 2017 | 0.608 | 0.04 | 1.54807 | 2.3965195 | 21.53604 | 0.160067 | 27.93 |
| 300087 | 2017 | 0.747 | 0.04 | 1.54807 | 2.3965195 | 21.18546 | 0.099638 | 10.72 |
| 2331   | 2017 | 1.259 | 0.04 | 1.54807 | 2.3965195 | 21.43337 | 0.064083 | 7.84  |
| 600761 | 2017 | -0.35 | 0.04 | 1.54807 | 2.3965195 | 22.68208 | 0.108346 | 37.97 |
| 600761 | 2017 | -0.16 | 0.04 | 1.54807 | 2.3965195 | 22.68208 | 0.108346 | 37.97 |
| 603011 | 2017 | 0.484 | 0.04 | 1.54807 | 2.3965195 | 21.3897  | 0.024831 | 33.01 |
| 2230   | 2017 | 2.495 | 0.04 | 1.54807 | 2.3965195 | 23.31406 | 0.060255 | 12.9  |
| 600551 | 2017 | 0.154 | 0.04 | 1.54807 | 2.3965195 | 22.63153 | 0.062964 | 56.79 |
| 521    | 2017 | -0.03 | 0.04 | 1.54807 | 2.3965195 | 23.49345 | 0.006999 | 22.47 |
| 300009 | 2017 | 1.27  | 0.04 | 1.54807 | 2.3965195 | 21.53604 | 0.160067 | 27.93 |
| 600418 | 2017 | -0.35 | 0.04 | 1.54807 | 2.3965195 | 24.51899 | 0.015564 | 23.55 |
| 2331   | 2017 | 1.468 | 0.04 | 1.54807 | 2.3965195 | 21.43337 | 0.064083 | 7.84  |
| 2743   | 2017 | -0.46 | 0.04 | 1.54807 | 2.3965195 | 22.51261 | 0.035472 | 37.96 |
| 300247 | 2017 | 0.43  | 0.04 | 1.54807 | 2.3965195 | 21.81844 | 0.027653 | 14.44 |
| 713    | 2017 | 0.675 | 0.04 | 1.54807 | 2.3965195 | 21.31079 | 0.01061  | 34.11 |
| 2230   | 2017 | 2.053 | 0.04 | 1.54807 | 2.3965195 | 23.31406 | 0.060255 | 12.9  |
| 300009 | 2017 | 0.976 | 0.04 | 1.54807 | 2.3965195 | 21.53604 | 0.160067 | 27.93 |
| 2230   | 2017 | 1.723 | 0.04 | 1.54807 | 2.3965195 | 22.93019 | 0.060255 | 12.9  |
| 859    | 2017 | 0.277 | 0.04 | 1.54807 | 2.3965195 | 21.48729 | 0.028148 | 25.11 |
| 713    | 2017 | 0.675 | 0.04 | 1.54807 | 2.3965195 | 21.5085  | 0.01061  | 34.11 |
| 2556   | 2017 | -0.27 | 0.04 | 1.54807 | 2.3965195 | 22.2016  | 0.060665 | 40.56 |
| 600418 | 2017 | -0.1  | 0.04 | 1.54807 | 2.3965195 | 24.51899 | 0.015564 | 23.55 |
| 521    | 2017 | -0.53 | 0.04 | 1.54807 | 2.3965195 | 23.49345 | 0.006999 | 22.47 |
| 300218 | 2017 | 0.546 | 0.04 | 1.54807 | 2.3965195 | 21.39123 | -0.01444 | 21.9  |
| 2331   | 2017 | 0.806 | 0.04 | 1.54807 | 2.3965195 | 21.43337 | 0.064083 | 7.84  |
| 300087 | 2017 | 0.968 | 0.04 | 1.54807 | 2.3965195 | 21.18546 | 0.099638 | 10.72 |
| 600418 | 2017 | -0.51 | 0.04 | 1.54807 | 2.3965195 | 24.51899 | 0.015564 | 23.55 |
| 713    | 2017 | 0.675 | 0.04 | 1.54807 | 2.3965195 | 21.5085  | 0.01061  | 34.11 |
| 868    | 2017 | -0.25 | 0.04 | 1.54807 | 2.3965195 | 22.70377 | -0.24253 | 21.13 |
| 300218 | 2017 | -0.04 | 0.04 | 1.54807 | 2.3965195 | 21.39123 | -0.01444 | 21.9  |
| 600418 | 2017 | -0.22 | 0.04 | 1.54807 | 2.3965195 | 24.22863 | 0.015564 | 23.55 |
| 600418 | 2017 | -0.45 | 0.04 | 1.54807 | 2.3965195 | 24.51899 | 0.015564 | 23.55 |
| 300087 | 2017 | 0.902 | 0.04 | 1.54807 | 2.3965195 | 21.18546 | 0.099638 | 10.72 |
| 603308 | 2017 | 1.457 | 0.04 | 1.54807 | 2.3965195 | 22.33347 | 0.019519 | 30.6  |
| 300520 | 2017 | 2.104 | 0.04 | 1.54807 | 2.3965195 | 20.95702 | 0.033752 | 34.01 |
| 521    | 2017 | -0.16 | 0.04 | 1.54807 | 2.3965195 | 23.49345 | 0.006999 | 22.47 |
| 300087 | 2017 | 0.968 | 0.04 | 1.54807 | 2.3965195 | 20.6     | 0.099638 | 10.72 |
| 600990 | 2017 | 0.626 | 0.04 | 1.54807 | 2.3965195 | 22.5876  | 0.094639 | 45.67 |
| 2140   | 2017 | 0.673 | 0.04 | 1.54807 | 2.3965195 | 22.54157 | -0.03111 | 58.33 |
| 2230   | 2017 | 2.495 | 0.04 | 1.54807 | 2.3965195 | 23.31406 | 0.060255 | 12.9  |
| 600983 | 2017 | -0.18 | 0.04 | 1.54807 | 2.3965195 | 22.76564 | -0.02492 | 51    |
| 600761 | 2017 | 0.097 | 0.04 | 1.54807 | 2.3965195 | 22.68208 | 0.108346 | 37.97 |
| 600990 | 2017 | 0.363 | 0.04 | 1.54807 | 2.3965195 | 22.5876  | 0.094639 | 45.67 |
| 300247 | 2017 | 0.412 | 0.04 | 1.54807 | 2.3965195 | 21.81844 | 0.027653 | 14.44 |
| 600418 | 2017 | -0.1  | 0.04 | 1.54807 | 2.3965195 | 24.51899 | 0.015564 | 23.55 |
| 600551 | 2017 | 0.455 | 0.04 | 1.54807 | 2.3965195 | 22.63153 | 0.062964 | 56.79 |
| 2541   | 2017 | -0.17 | 0.04 | 1.54807 | 2.3965195 | 22.53294 | 0.051988 | 37.03 |
| 713    | 2017 | 0.675 | 0.04 | 1.54807 | 2.3965195 | 21.5085  | 0.01061  | 34.11 |
| 603308 | 2017 | 0.619 | 0.04 | 1.54807 | 2.3965195 | 22.6379  | 0.019519 | 30.6  |
| 600418 | 2017 | -0.35 | 0.04 | 1.54807 | 2.3965195 | 24.51899 | 0.015564 | 23.55 |
| 2331   | 2017 | 0.806 | 0.04 | 1.54807 | 2.3965195 | 21.43337 | 0.064083 | 7.84  |
| 600418 | 2017 | -0.51 | 0.04 | 1.54807 | 2.3965195 | 24.51899 | 0.015564 | 23.55 |
| 300247 | 2017 | -0.53 | 0.04 | 1.54807 | 2.3965195 | 21.81844 | 0.027653 | 14.44 |
| 300388 | 2017 | 0.534 | 0.04 | 1.54807 | 2.3965195 | 22.81499 | 0.093678 | 37.58 |



|        |      |       |      |         |           |          |          |       |
|--------|------|-------|------|---------|-----------|----------|----------|-------|
| 859    | 2017 | 0.349 | 0.04 | 1.54807 | 2.3965195 | 21.48729 | 0.028148 | 25.11 |
| 859    | 2017 | 0.226 | 0.04 | 1.54807 | 2.3965195 | 21.39711 | 0.028148 | 25.11 |
| 521    | 2017 | 0.296 | 0.04 | 1.54807 | 2.3965195 | 23.49345 | 0.006999 | 22.47 |
| 300247 | 2017 | 0.538 | 0.04 | 1.54807 | 2.3965195 | 21.81844 | 0.027653 | 14.44 |
| 868    | 2017 | -0.25 | 0.04 | 1.54807 | 2.3965195 | 22.80006 | -0.24253 | 21.13 |
| 859    | 2017 | 0.447 | 0.04 | 1.54807 | 2.3965195 | 21.48729 | 0.028148 | 25.11 |
| 603308 | 2017 | 1.613 | 0.04 | 1.54807 | 2.3965195 | 22.6379  | 0.019519 | 30.6  |
| 868    | 2017 | -0.29 | 0.04 | 1.54807 | 2.3965195 | 22.80006 | -0.24253 | 21.13 |
| 2541   | 2017 | -0.17 | 0.04 | 1.54807 | 2.3965195 | 22.86648 | 0.051988 | 37.03 |
| 600418 | 2017 | -0.27 | 0.04 | 1.54807 | 2.3965195 | 24.51899 | 0.015564 | 23.55 |
| 600063 | 2017 | 0.365 | 0.04 | 1.54807 | 2.3965195 | 22.90501 | 0.017672 | 30.74 |
| 2230   | 2017 | 2.299 | 0.04 | 1.54807 | 2.3965195 | 23.31406 | 0.060255 | 12.9  |
| 2557   | 2017 | -0.1  | 0.04 | 1.54807 | 2.3965195 | 22.26526 | 0.10272  | 49.95 |
| 600761 | 2017 | 0.039 | 0.04 | 1.54807 | 2.3965195 | 22.68208 | 0.108346 | 37.97 |
| 300009 | 2017 | 0.877 | 0.04 | 1.54807 | 2.3965195 | 21.53604 | 0.160067 | 27.93 |
| 600418 | 2017 | -0.35 | 0.04 | 1.54807 | 2.3965195 | 24.51899 | 0.015564 | 23.55 |
| 300247 | 2017 | -0.53 | 0.04 | 1.54807 | 2.3965195 | 21.81844 | 0.027653 | 14.44 |
| 2541   | 2017 | -0.64 | 0.04 | 1.54807 | 2.3965195 | 22.86648 | 0.051988 | 37.03 |
| 300087 | 2017 | 0.968 | 0.04 | 1.54807 | 2.3965195 | 21.18546 | 0.099638 | 10.72 |
| 2230   | 2017 | 2.495 | 0.04 | 1.54807 | 2.3965195 | 23.31406 | 0.060255 | 12.9  |
| 300520 | 2017 | 2.104 | 0.04 | 1.54807 | 2.3965195 | 20.95702 | 0.033752 | 34.01 |
| 300218 | 2017 | -0.15 | 0.04 | 1.54807 | 2.3965195 | 21.39123 | -0.01444 | 21.9  |
| 2331   | 2017 | 1.468 | 0.04 | 1.54807 | 2.3965195 | 21.43337 | 0.064083 | 7.84  |
| 600063 | 2017 | 0.365 | 0.04 | 1.54807 | 2.3965195 | 22.90501 | 0.017672 | 30.74 |
| 600418 | 2017 | -0.51 | 0.04 | 1.54807 | 2.3965195 | 24.51899 | 0.015564 | 23.55 |
| 603011 | 2017 | 0.319 | 0.04 | 1.54807 | 2.3965195 | 21.51173 | 0.024831 | 33.01 |
| 600551 | 2017 | -0.21 | 0.04 | 1.54807 | 2.3965195 | 22.63153 | 0.062964 | 56.79 |
| 868    | 2017 | -0.29 | 0.04 | 1.54807 | 2.3965195 | 22.80006 | -0.24253 | 21.13 |
| 300388 | 2017 | -0.79 | 0.04 | 1.54807 | 2.3965195 | 22.81499 | 0.093678 | 37.58 |
| 2557   | 2017 | 0.138 | 0.04 | 1.54807 | 2.3965195 | 22.26526 | 0.10272  | 49.95 |
| 2230   | 2017 | 2.053 | 0.04 | 1.54807 | 2.3965195 | 23.31406 | 0.060255 | 12.9  |
| 600418 | 2017 | -0.51 | 0.04 | 1.54807 | 2.3965195 | 24.51899 | 0.015564 | 23.55 |
| 2743   | 2017 | -0.41 | 0.04 | 1.54807 | 2.3965195 | 22.51261 | 0.035472 | 37.96 |
| 300009 | 2017 | 0.111 | 0.04 | 1.54807 | 2.3965195 | 21.53604 | 0.160067 | 27.93 |
| 521    | 2017 | 0.049 | 0.04 | 1.54807 | 2.3965195 | 23.49345 | 0.006999 | 22.47 |
| 2331   | 2017 | 0.144 | 0.04 | 1.54807 | 2.3965195 | 21.43337 | 0.064083 | 7.84  |
| 300388 | 2017 | 0.281 | 0.04 | 1.54807 | 2.3965195 | 22.81499 | 0.093678 | 37.58 |
| 300388 | 2017 | -0.79 | 0.04 | 1.54807 | 2.3965195 | 22.81499 | 0.093678 | 37.58 |
| 300274 | 2017 | 0.253 | 0.04 | 1.54807 | 2.3965195 | 23.51124 | 0.144426 | 31.14 |
| 868    | 2017 | -0.69 | 0.04 | 1.54807 | 2.3965195 | 22.80006 | -0.24253 | 21.13 |
| 2230   | 2017 | 2.495 | 0.04 | 1.54807 | 2.3965195 | 23.31406 | 0.060255 | 12.9  |
| 603011 | 2017 | 0.264 | 0.04 | 1.54807 | 2.3965195 | 21.51173 | 0.024831 | 33.01 |
| 2541   | 2017 | -0.39 | 0.04 | 1.54807 | 2.3965195 | 22.86648 | 0.051988 | 37.03 |
| 600761 | 2017 | -0.35 | 0.04 | 1.54807 | 2.3965195 | 22.68208 | 0.108346 | 37.97 |
| 300087 | 2017 | -0.36 | 0.04 | 1.54807 | 2.3965195 | 21.18546 | 0.099638 | 10.72 |
| 300520 | 2017 | 2.104 | 0.04 | 1.54807 | 2.3965195 | 20.95702 | 0.033752 | 34.01 |
| 600418 | 2017 | -0.35 | 0.04 | 1.54807 | 2.3965195 | 24.51899 | 0.015564 | 23.55 |
| 2743   | 2017 | -0.43 | 0.04 | 1.54807 | 2.3965195 | 22.51261 | 0.035472 | 37.96 |
| 600063 | 2017 | 0.365 | 0.04 | 1.54807 | 2.3965195 | 22.90501 | 0.017672 | 30.74 |
| 521    | 2017 | 0.025 | 0.04 | 1.54807 | 2.3965195 | 23.49345 | 0.006999 | 22.47 |
| 600418 | 2017 | -0.35 | 0.04 | 1.54807 | 2.3965195 | 24.51899 | 0.015564 | 23.55 |
| 300274 | 2017 | -0.19 | 0.04 | 1.54807 | 2.3965195 | 23.51124 | 0.144426 | 31.14 |
| 2556   | 2017 | 0.367 | 0.04 | 1.54807 | 2.3965195 | 22.75965 | 0.060665 | 40.56 |
| 600418 | 2017 | -0.35 | 0.04 | 1.54807 | 2.3965195 | 24.51899 | 0.015564 | 23.55 |

|        |      |       |      |          |            |          |          |       |
|--------|------|-------|------|----------|------------|----------|----------|-------|
| 600418 | 2017 | -0.35 | 0.04 | 1.54807  | 2.3965195  | 24.51899 | 0.015564 | 23.55 |
| 600444 | 2017 | 1.015 | 0.04 | 1.54807  | 2.3965195  | 20.53398 | 0.302158 | 36.82 |
| 603011 | 2017 | 0.264 | 0.04 | 1.54807  | 2.3965195  | 21.51173 | 0.024831 | 33.01 |
| 300388 | 2017 | 0.281 | 0.04 | 1.54807  | 2.3965195  | 22.33357 | 0.093678 | 37.58 |
| 2230   | 2017 | 2.184 | 0.04 | 1.54807  | 2.3965195  | 23.31406 | 0.060255 | 12.9  |
| 600761 | 2017 | -0.16 | 0.04 | 1.54807  | 2.3965195  | 22.56342 | 0.108346 | 37.97 |
| 2140   | 2017 | 0.673 | 0.04 | 1.54807  | 2.3965195  | 22.54157 | -0.03111 | 58.33 |
| 300009 | 2017 | 1.27  | 0.04 | 1.54807  | 2.3965195  | 21.53604 | 0.160067 | 27.93 |
| 600990 | 2017 | -0.1  | 0.04 | 1.54807  | 2.3965195  | 22.5876  | 0.094639 | 45.67 |
| 600444 | 2017 | -0.12 | 0.04 | 1.54807  | 2.3965195  | 20.53398 | 0.302158 | 36.82 |
| 2331   | 2017 | 0.806 | 0.04 | 1.54807  | 2.3965195  | 21.43337 | 0.064083 | 7.84  |
| 521    | 2017 | 0.684 | 0.04 | 1.54807  | 2.3965195  | 23.49345 | 0.006999 | 22.47 |
| 2230   | 2017 | 2.495 | 0.04 | 1.54807  | 2.3965195  | 23.31406 | 0.060255 | 12.9  |
| 600983 | 2017 | -0.18 | 0.04 | 1.54807  | 2.3965195  | 22.86069 | -0.02492 | 51    |
| 2230   | 2017 | 1.68  | 0.04 | 1.54807  | 2.3965195  | 23.31406 | 0.060255 | 12.9  |
| 603308 | 2017 | 1.613 | 0.04 | 1.54807  | 2.3965195  | 22.6379  | 0.019519 | 30.6  |
| 2230   | 2017 | 2.495 | 0.04 | 1.54807  | 2.3965195  | 23.31406 | 0.060255 | 12.9  |
| 603308 | 2017 | 1.613 | 0.04 | 1.54807  | 2.3965195  | 22.6379  | 0.019519 | 30.6  |
| 600418 | 2017 | 0.039 | 0.04 | 1.54807  | 2.3965195  | 24.51899 | 0.015564 | 23.55 |
| 600444 | 2017 | -0.12 | 0.04 | 1.54807  | 2.3965195  | 20.53398 | 0.302158 | 36.82 |
| 2140   | 2017 | -0.53 | 0.04 | 1.54807  | 2.3965195  | 22.54157 | -0.03111 | 58.33 |
| 2230   | 2017 | 2.184 | 0.04 | 1.54807  | 2.3965195  | 23.31406 | 0.060255 | 12.9  |
| 2230   | 2017 | 1.17  | 0.04 | 1.54807  | 2.3965195  | 23.31406 | 0.060255 | 12.9  |
| 300247 | 2017 | -0.27 | 0.04 | 1.54807  | 2.3965195  | 21.81844 | 0.027653 | 14.44 |
| 300388 | 2017 | -0.62 | 0.04 | 1.54807  | 2.3965195  | 22.81499 | 0.093678 | 37.58 |
| 600990 | 2017 | -0.1  | 0.04 | 1.54807  | 2.3965195  | 22.5876  | 0.094639 | 45.67 |
| 2541   | 2017 | -0.26 | 0.04 | 1.54807  | 2.3965195  | 22.86648 | 0.051988 | 37.03 |
| 545    | 2017 | 0.028 | 0.07 | 0.510826 | 0.26094302 | 21.73568 | 0.082753 | 37.3  |
| 545    | 2017 | 0.159 | 0.07 | 0.510826 | 0.26094302 | 21.73568 | 0.082753 | 37.3  |
| 545    | 2017 | 0.159 | 0.07 | 0.510826 | 0.26094302 | 21.73568 | 0.082753 | 37.3  |
| 545    | 2017 | 0.185 | 0.07 | 0.510826 | 0.26094302 | 21.5166  | 0.082753 | 37.3  |
| 600809 | 2017 | -0.67 | 0    | 1.142336 | 1.3049315  | 22.72076 | 0.18809  | 69.97 |
| 600809 | 2017 | -0.67 | 0    | 1.142336 | 1.3049315  | 22.91378 | 0.18809  | 69.97 |
| 600809 | 2017 | -0.67 | 0    | 1.142336 | 1.3049315  | 22.91378 | 0.18809  | 69.97 |
| 2457   | 2017 | -0.74 | 0    | 1.409542 | 1.9868074  | 21.75308 | 0.008941 | 21.28 |
| 2457   | 2017 | -0.74 | 0    | 1.409542 | 1.9868074  | 21.75308 | 0.008941 | 21.28 |
| 2457   | 2017 | -0.74 | 0    | 1.409542 | 1.9868074  | 21.75308 | 0.008941 | 21.28 |
| 2457   | 2017 | -0.74 | 0    | 1.409542 | 1.9868074  | 21.75308 | 0.008941 | 21.28 |
| 2457   | 2017 | -0.74 | 0    | 1.409542 | 1.9868074  | 21.72114 | 0.008941 | 21.28 |
| 2457   | 2017 | -0.74 | 0    | 1.409542 | 1.9868074  | 21.75308 | 0.008941 | 21.28 |
| 2457   | 2017 | -0.74 | 0    | 1.409542 | 1.9868074  | 21.75308 | 0.008941 | 21.28 |
| 2457   | 2017 | -0.74 | 0    | 1.409542 | 1.9868074  | 21.75308 | 0.008941 | 21.28 |
| 2457   | 2017 | -0.74 | 0    | 1.409542 | 1.9868074  | 21.75308 | 0.008941 | 21.28 |
| 2457   | 2017 | -0.74 | 0    | 1.409542 | 1.9868074  | 21.75308 | 0.008941 | 21.28 |
| 600781 | 2017 | 0.754 | 0.02 | 1.216403 | 1.4796356  | 23.01379 | 0.166369 | 44.09 |
| 600781 | 2017 | 0.754 | 0.02 | 1.216403 | 1.4796356  | 23.01379 | 0.166369 | 44.09 |
| 600781 | 2017 | 0.754 | 0.02 | 1.216403 | 1.4796356  | 23.01379 | 0.166369 | 44.09 |
| 600781 | 2017 | 0.754 | 0.02 | 1.216403 | 1.4796356  | 23.01379 | 0.166369 | 44.09 |
| 600781 | 2017 | 0.754 | 0.02 | 1.216403 | 1.4796356  | 22.64576 | 0.166369 | 44.09 |
| 600781 | 2017 | 0.754 | 0.02 | 1.216403 | 1.4796356  | 23.01379 | 0.166369 | 44.09 |
| 600887 | 2017 | -0.43 | 0    | 1.951295 | 3.8075535  | 24.6212  | 0.237831 | 9.27  |
| 300355 | 2017 | -0.76 | 0    | 1.951295 | 3.8075535  | 23.24708 | 0.224354 | 23.23 |
| 600887 | 2017 | -0.98 | 0    | 1.951295 | 3.8075535  | 24.6212  | 0.237831 | 9.27  |
| 300355 | 2017 | 0.563 | 0    | 1.951295 | 3.8075535  | 23.24708 | 0.224354 | 23.23 |

|        |      |       |      |          |            |          |          |       |
|--------|------|-------|------|----------|------------|----------|----------|-------|
| 600201 | 2017 | 0.899 | 0    | 1.951295 | 3.8075535  | 22.46085 | 0.193886 | 10.46 |
| 600887 | 2017 | -0.52 | 0    | 1.951295 | 3.8075535  | 24.42693 | 0.237831 | 9.27  |
| 300355 | 2017 | -0.06 | 0    | 1.951295 | 3.8075535  | 23.24708 | 0.224354 | 23.23 |
| 2688   | 2017 | 0.746 | 0    | 1.951295 | 3.8075535  | 21.80843 | 0.067212 | 38.05 |
| 300355 | 2017 | -0.19 | 0    | 1.951295 | 3.8075535  | 23.24708 | 0.224354 | 23.23 |
| 600887 | 2017 | -0.96 | 0    | 1.951295 | 3.8075535  | 24.6212  | 0.237831 | 9.27  |
| 300355 | 2017 | 0.033 | 0    | 1.951295 | 3.8075535  | 23.07087 | 0.224354 | 23.23 |
| 2688   | 2017 | 0.581 | 0    | 1.951295 | 3.8075535  | 21.55641 | 0.067212 | 38.05 |
| 300355 | 2017 | -0.76 | 0    | 1.951295 | 3.8075535  | 23.24708 | 0.224354 | 23.23 |
| 2688   | 2017 | 0.746 | 0    | 1.951295 | 3.8075535  | 21.80843 | 0.067212 | 38.05 |
| 600887 | 2017 | -0.96 | 0    | 1.951295 | 3.8075535  | 24.6212  | 0.237831 | 9.27  |
| 600887 | 2017 | -0.98 | 0    | 1.951295 | 3.8075535  | 24.6212  | 0.237831 | 9.27  |
| 300355 | 2017 | 0.122 | 0    | 1.951295 | 3.8075535  | 23.24708 | 0.224354 | 23.23 |
| 600201 | 2017 | 0.568 | 0    | 1.951295 | 3.8075535  | 22.46085 | 0.193886 | 10.46 |
| 600887 | 2017 | -0.5  | 0    | 1.951295 | 3.8075535  | 24.6212  | 0.237831 | 9.27  |
| 300355 | 2017 | 0.563 | 0    | 1.951295 | 3.8075535  | 23.24708 | 0.224354 | 23.23 |
| 600201 | 2017 | 0.568 | 0    | 1.951295 | 3.8075535  | 22.46085 | 0.193886 | 10.46 |
| 600887 | 2017 | -0.98 | 0    | 1.951295 | 3.8075535  | 24.42693 | 0.237831 | 9.27  |
| 2688   | 2017 | 0.746 | 0    | 1.951295 | 3.8075535  | 21.80843 | 0.067212 | 38.05 |
| 600201 | 2017 | 0.502 | 0    | 1.951295 | 3.8075535  | 22.31934 | 0.193886 | 10.46 |
| 600887 | 2017 | -0.98 | 0    | 1.951295 | 3.8075535  | 24.6212  | 0.237831 | 9.27  |
| 600887 | 2017 | -0.88 | 0    | 1.951295 | 3.8075535  | 24.6212  | 0.237831 | 9.27  |
| 2688   | 2017 | 0.084 | 0    | 1.951295 | 3.8075535  | 21.80843 | 0.067212 | 38.05 |
| 300355 | 2017 | 0.122 | 0    | 1.951295 | 3.8075535  | 23.24708 | 0.224354 | 23.23 |
| 2688   | 2017 | -0.58 | 0    | 1.951295 | 3.8075535  | 21.80843 | 0.067212 | 38.05 |
| 2437   | 2017 | 0.291 | 0.02 | 0.693147 | 0.48045301 | 22.92759 | 0.071786 | 42.63 |
| 2737   | 2017 | 0.645 | 0.02 | 0.693147 | 0.48045301 | 22.22069 | 0.148615 | 41.62 |
| 901    | 2017 | 0.895 | 0.02 | 0.693147 | 0.48045301 | 22.55899 | 0.045544 | 16.88 |
| 600811 | 2017 | 0.339 | 0.02 | 0.693147 | 0.48045301 | 24.59593 | 0.036343 | 16.39 |
| 2698   | 2017 | -0.45 | 0.02 | 0.693147 | 0.48045301 | 21.69758 | 0.060612 | 24.11 |
| 600202 | 2017 | -0.36 | 0.02 | 0.693147 | 0.48045301 | 21.22495 | -0.14691 | 34.03 |
| 600178 | 2017 | -0.31 | 0.02 | 0.693147 | 0.48045301 | 22.06185 | 0.022773 | 51.42 |
| 600853 | 2017 | -0.82 | 0.02 | 0.693147 | 0.48045301 | 23.271   | 0.135105 | 33.34 |
| 711    | 2017 | -0.07 | 0.02 | 0.693147 | 0.48045301 | 22.88804 | 0.06904  | 19.48 |
| 711    | 2017 | -0.55 | 0.02 | 0.693147 | 0.48045301 | 22.88804 | 0.06904  | 19.48 |
| 600853 | 2017 | -0.82 | 0.02 | 0.693147 | 0.48045301 | 23.271   | 0.135105 | 33.34 |
| 600666 | 2017 | 0.141 | 0.02 | 0.693147 | 0.48045301 | 22.69459 | -0.00784 | 19    |
| 600811 | 2017 | 0.339 | 0.02 | 0.693147 | 0.48045301 | 24.59593 | 0.036343 | 16.39 |
| 600726 | 2017 | -0.48 | 0.02 | 0.693147 | 0.48045301 | 23.95758 | -0.4336  | 44.8  |
| 2437   | 2017 | 0.649 | 0.02 | 0.693147 | 0.48045301 | 22.92759 | 0.071786 | 42.63 |
| 2698   | 2017 | 0.212 | 0.02 | 0.693147 | 0.48045301 | 21.69758 | 0.060612 | 24.11 |
| 600853 | 2017 | -0.16 | 0.02 | 0.693147 | 0.48045301 | 23.271   | 0.135105 | 33.34 |
| 300489 | 2017 | 0.755 | 0.02 | 0.693147 | 0.48045301 | 20.22082 | 0.02684  | 27.33 |
| 600202 | 2017 | -0.36 | 0.02 | 0.693147 | 0.48045301 | 21.22495 | -0.14691 | 34.03 |
| 2698   | 2017 | 0.432 | 0.02 | 0.693147 | 0.48045301 | 21.69758 | 0.060612 | 24.11 |
| 600178 | 2017 | 0.725 | 0.02 | 0.693147 | 0.48045301 | 22.06185 | 0.022773 | 51.42 |
| 600726 | 2017 | -0.24 | 0.02 | 0.693147 | 0.48045301 | 23.95758 | -0.4336  | 44.8  |
| 2698   | 2017 | 0.08  | 0.02 | 0.693147 | 0.48045301 | 21.69758 | 0.060612 | 24.11 |
| 600371 | 2017 | -0.53 | 0.02 | 0.693147 | 0.48045301 | 20.4577  | 0.121958 | 48.76 |
| 2437   | 2017 | 0.649 | 0.02 | 0.693147 | 0.48045301 | 22.92759 | 0.071786 | 42.63 |
| 2737   | 2017 | 0.645 | 0.02 | 0.693147 | 0.48045301 | 21.62851 | 0.148615 | 41.62 |
| 600666 | 2017 | 0.115 | 0.02 | 0.693147 | 0.48045301 | 22.69459 | -0.00784 | 19    |
| 901    | 2017 | 0.453 | 0.02 | 0.693147 | 0.48045301 | 22.55899 | 0.045544 | 16.88 |
| 2437   | 2017 | 0.649 | 0.02 | 0.693147 | 0.48045301 | 22.92759 | 0.071786 | 42.63 |

|        |      |       |      |          |            |          |          |       |
|--------|------|-------|------|----------|------------|----------|----------|-------|
| 600726 | 2017 | -0.48 | 0.02 | 0.693147 | 0.48045301 | 23.95758 | -0.4336  | 44.8  |
| 2698   | 2017 | -0.21 | 0.02 | 0.693147 | 0.48045301 | 21.69758 | 0.060612 | 24.11 |
| 600853 | 2017 | -0.69 | 0.02 | 0.693147 | 0.48045301 | 23.271   | 0.135105 | 33.34 |
| 300040 | 2017 | -0.12 | 0.02 | 0.693147 | 0.48045301 | 22.05379 | 0.053657 | 19.75 |
| 711    | 2017 | -0.07 | 0.02 | 0.693147 | 0.48045301 | 22.88804 | 0.06904  | 19.48 |
| 2437   | 2017 | 0.649 | 0.02 | 0.693147 | 0.48045301 | 22.92759 | 0.071786 | 42.63 |
| 600178 | 2017 | 0.725 | 0.02 | 0.693147 | 0.48045301 | 22.06185 | 0.022773 | 51.42 |
| 600666 | 2017 | -0.34 | 0.02 | 0.693147 | 0.48045301 | 22.36409 | -0.00784 | 19    |
| 600666 | 2017 | 0.103 | 0.02 | 0.693147 | 0.48045301 | 22.69459 | -0.00784 | 19    |
| 2698   | 2017 | -0.45 | 0.02 | 0.693147 | 0.48045301 | 21.59527 | 0.060612 | 24.11 |
| 300040 | 2017 | -0.12 | 0.02 | 0.693147 | 0.48045301 | 22.05379 | 0.053657 | 19.75 |
| 711    | 2017 | -0.07 | 0.02 | 0.693147 | 0.48045301 | 22.88804 | 0.06904  | 19.48 |
| 711    | 2017 | -0.73 | 0.02 | 0.693147 | 0.48045301 | 22.88804 | 0.06904  | 19.48 |
| 600726 | 2017 | -0.48 | 0.02 | 0.693147 | 0.48045301 | 23.95758 | -0.4336  | 44.8  |
| 600853 | 2017 | -0.82 | 0.02 | 0.693147 | 0.48045301 | 23.271   | 0.135105 | 33.34 |
| 711    | 2017 | -0.29 | 0.02 | 0.693147 | 0.48045301 | 22.88804 | 0.06904  | 19.48 |
| 300040 | 2017 | -0.12 | 0.02 | 0.693147 | 0.48045301 | 21.74288 | 0.053657 | 19.75 |
| 600701 | 2017 | 0.523 | 0.02 | 0.693147 | 0.48045301 | 23.00565 | -0.15694 | 16.42 |
| 600095 | 2017 | -0.85 | 0.02 | 0.693147 | 0.48045301 | 20.81358 | 0.02758  | 16.08 |
| 600095 | 2017 | -0.85 | 0.02 | 0.693147 | 0.48045301 | 20.81358 | 0.02758  | 16.08 |
| 600289 | 2017 | 1.521 | 0.02 | 0.693147 | 0.48045301 | 21.81595 | -0.4336  | 32.89 |
| 2437   | 2017 | -0.04 | 0.02 | 0.693147 | 0.48045301 | 22.92759 | 0.071786 | 42.63 |
| 2737   | 2017 | 0.645 | 0.02 | 0.693147 | 0.48045301 | 22.22069 | 0.148615 | 41.62 |
| 603023 | 2017 | 0.256 | 0.02 | 0.693147 | 0.48045301 | 20.24078 | 0.122058 | 45.22 |
| 600726 | 2017 | -0.57 | 0.02 | 0.693147 | 0.48045301 | 23.95758 | -0.4336  | 44.8  |
| 603023 | 2017 | 0.256 | 0.02 | 0.693147 | 0.48045301 | 20.24078 | 0.122058 | 45.22 |
| 600666 | 2017 | 0.115 | 0.02 | 0.693147 | 0.48045301 | 22.69459 | -0.00784 | 19    |
| 600038 | 2017 | 0.819 | 0.02 | 0.693147 | 0.48045301 | 22.5113  | 0.060563 | 28.21 |
| 2437   | 2017 | -0.01 | 0.02 | 0.693147 | 0.48045301 | 22.92759 | 0.071786 | 42.63 |
| 600853 | 2017 | -0.56 | 0.02 | 0.693147 | 0.48045301 | 23.271   | 0.135105 | 33.34 |
| 711    | 2017 | -0.13 | 0.02 | 0.693147 | 0.48045301 | 21.97909 | 0.06904  | 19.48 |
| 901    | 2017 | 0.453 | 0.02 | 0.693147 | 0.48045301 | 22.55899 | 0.045544 | 16.88 |
| 300040 | 2017 | -0.12 | 0.02 | 0.693147 | 0.48045301 | 22.05379 | 0.053657 | 19.75 |
| 901    | 2017 | 0.453 | 0.02 | 0.693147 | 0.48045301 | 22.55899 | 0.045544 | 16.88 |
| 901    | 2017 | 0.568 | 0.02 | 0.693147 | 0.48045301 | 22.04697 | 0.045544 | 16.88 |
| 600289 | 2017 | 1.521 | 0.02 | 0.693147 | 0.48045301 | 21.81595 | -0.4336  | 32.89 |
| 600038 | 2017 | 0.34  | 0.02 | 0.693147 | 0.48045301 | 23.83684 | 0.060563 | 28.21 |
| 600726 | 2017 | -0.98 | 0.02 | 0.693147 | 0.48045301 | 23.73761 | -0.4336  | 44.8  |
| 2437   | 2017 | 0.358 | 0.02 | 0.693147 | 0.48045301 | 22.91636 | 0.071786 | 42.63 |
| 600095 | 2017 | -0.85 | 0.02 | 0.693147 | 0.48045301 | 20.81358 | 0.02758  | 16.08 |
| 600811 | 2017 | 0.339 | 0.02 | 0.693147 | 0.48045301 | 24.59593 | 0.036343 | 16.39 |
| 600598 | 2017 | -0.96 | 0.02 | 0.693147 | 0.48045301 | 22.75757 | 0.129773 | 64.14 |
| 901    | 2017 | 0.453 | 0.02 | 0.693147 | 0.48045301 | 22.55899 | 0.045544 | 16.88 |
| 600726 | 2017 | -0.48 | 0.02 | 0.693147 | 0.48045301 | 23.95758 | -0.4336  | 44.8  |
| 901    | 2017 | 0.453 | 0.02 | 0.693147 | 0.48045301 | 22.55899 | 0.045544 | 16.88 |
| 600095 | 2017 | -0.85 | 0.02 | 0.693147 | 0.48045301 | 20.80177 | 0.02758  | 16.08 |
| 2737   | 2017 | 0.645 | 0.02 | 0.693147 | 0.48045301 | 22.22069 | 0.148615 | 41.62 |
| 600289 | 2017 | 1.521 | 0.02 | 0.693147 | 0.48045301 | 21.81595 | -0.4336  | 32.89 |
| 600701 | 2017 | 0.523 | 0.02 | 0.693147 | 0.48045301 | 23.00565 | -0.15694 | 16.42 |
| 600726 | 2017 | -0.48 | 0.02 | 0.693147 | 0.48045301 | 23.95758 | -0.4336  | 44.8  |
| 600202 | 2017 | -0.36 | 0.02 | 0.693147 | 0.48045301 | 21.23461 | -0.14691 | 34.03 |
| 2437   | 2017 | 0.649 | 0.02 | 0.693147 | 0.48045301 | 22.92759 | 0.071786 | 42.63 |
| 2737   | 2017 | 0.645 | 0.02 | 0.693147 | 0.48045301 | 22.22069 | 0.148615 | 41.62 |
| 600371 | 2017 | -0.53 | 0.02 | 0.693147 | 0.48045301 | 20.4577  | 0.121958 | 48.76 |

|        |      |       |      |          |            |          |          |       |
|--------|------|-------|------|----------|------------|----------|----------|-------|
| 600726 | 2017 | -0.48 | 0.02 | 0.693147 | 0.48045301 | 23.95758 | -0.4336  | 44.8  |
| 901    | 2017 | 0.564 | 0.02 | 0.693147 | 0.48045301 | 22.55899 | 0.045544 | 16.88 |
| 2698   | 2017 | 0.011 | 0.02 | 0.693147 | 0.48045301 | 21.69758 | 0.060612 | 24.11 |
| 2737   | 2017 | 0.645 | 0.02 | 0.693147 | 0.48045301 | 22.22069 | 0.148615 | 41.62 |
| 600853 | 2017 | -0.82 | 0.02 | 0.693147 | 0.48045301 | 23.271   | 0.135105 | 33.34 |
| 600666 | 2017 | 0.115 | 0.02 | 0.693147 | 0.48045301 | 22.69459 | -0.00784 | 19    |
| 600666 | 2017 | 0.115 | 0.02 | 0.693147 | 0.48045301 | 22.69459 | -0.00784 | 19    |
| 2698   | 2017 | -0.45 | 0.02 | 0.693147 | 0.48045301 | 21.69758 | 0.060612 | 24.11 |
| 2737   | 2017 | 0.302 | 0.02 | 0.693147 | 0.48045301 | 22.22069 | 0.148615 | 41.62 |
| 901    | 2017 | -0.43 | 0.02 | 0.693147 | 0.48045301 | 22.55899 | 0.045544 | 16.88 |
| 600038 | 2017 | 0.34  | 0.02 | 0.693147 | 0.48045301 | 22.5113  | 0.060563 | 28.21 |
| 600853 | 2017 | -0.16 | 0.02 | 0.693147 | 0.48045301 | 23.271   | 0.135105 | 33.34 |
| 600811 | 2017 | 0.339 | 0.02 | 0.693147 | 0.48045301 | 24.59593 | 0.036343 | 16.39 |
| 711    | 2017 | -0.73 | 0.02 | 0.693147 | 0.48045301 | 22.88804 | 0.06904  | 19.48 |
| 2437   | 2017 | 0.649 | 0.02 | 0.693147 | 0.48045301 | 22.92759 | 0.071786 | 42.63 |
| 600701 | 2017 | 0.523 | 0.02 | 0.693147 | 0.48045301 | 22.64974 | -0.15694 | 16.42 |
| 2698   | 2017 | 0.08  | 0.02 | 0.693147 | 0.48045301 | 21.69758 | 0.060612 | 24.11 |
| 300489 | 2017 | 0.755 | 0.02 | 0.693147 | 0.48045301 | 20.31115 | 0.02684  | 27.33 |
| 901    | 2017 | 0.453 | 0.02 | 0.693147 | 0.48045301 | 22.55899 | 0.045544 | 16.88 |
| 2698   | 2017 | 0.011 | 0.02 | 0.693147 | 0.48045301 | 21.69758 | 0.060612 | 24.11 |
| 600726 | 2017 | -0.48 | 0.02 | 0.693147 | 0.48045301 | 23.95758 | -0.4336  | 44.8  |
| 600289 | 2017 | 1.521 | 0.02 | 0.693147 | 0.48045301 | 21.81595 | -0.4336  | 32.89 |
| 600853 | 2017 | -0.82 | 0.02 | 0.693147 | 0.48045301 | 23.271   | 0.135105 | 33.34 |
| 600289 | 2017 | 1.521 | 0.02 | 0.693147 | 0.48045301 | 21.81595 | -0.4336  | 32.89 |
| 600726 | 2017 | -0.48 | 0.02 | 0.693147 | 0.48045301 | 23.95758 | -0.4336  | 44.8  |
| 2737   | 2017 | 0.645 | 0.02 | 0.693147 | 0.48045301 | 22.22069 | 0.148615 | 41.62 |
| 600038 | 2017 | 0.819 | 0.02 | 0.693147 | 0.48045301 | 23.83684 | 0.060563 | 28.21 |
| 603023 | 2017 | 0.256 | 0.02 | 0.693147 | 0.48045301 | 20.24078 | 0.122058 | 45.22 |
| 2437   | 2017 | 0.649 | 0.02 | 0.693147 | 0.48045301 | 22.92759 | 0.071786 | 42.63 |
| 2437   | 2017 | 0.649 | 0.02 | 0.693147 | 0.48045301 | 22.92759 | 0.071786 | 42.63 |
| 600701 | 2017 | 0.523 | 0.02 | 0.693147 | 0.48045301 | 23.00565 | -0.15694 | 16.42 |
| 600598 | 2017 | -0.96 | 0.02 | 0.693147 | 0.48045301 | 22.75757 | 0.129773 | 64.14 |
| 300040 | 2017 | -0.12 | 0.02 | 0.693147 | 0.48045301 | 22.05379 | 0.053657 | 19.75 |
| 711    | 2017 | -0.73 | 0.02 | 0.693147 | 0.48045301 | 22.88804 | 0.06904  | 19.48 |
| 2437   | 2017 | 0.649 | 0.02 | 0.693147 | 0.48045301 | 22.92759 | 0.071786 | 42.63 |
| 600598 | 2017 | -0.96 | 0.02 | 0.693147 | 0.48045301 | 22.73354 | 0.129773 | 64.14 |
| 600178 | 2017 | -0.29 | 0.02 | 0.693147 | 0.48045301 | 22.06185 | 0.022773 | 51.42 |
| 600701 | 2017 | 0.523 | 0.02 | 0.693147 | 0.48045301 | 23.00565 | -0.15694 | 16.42 |
| 600095 | 2017 | -0.85 | 0.02 | 0.693147 | 0.48045301 | 20.81358 | 0.02758  | 16.08 |
| 600095 | 2017 | -0.85 | 0.02 | 0.693147 | 0.48045301 | 20.81358 | 0.02758  | 16.08 |
| 711    | 2017 | -0.07 | 0.02 | 0.693147 | 0.48045301 | 22.88804 | 0.06904  | 19.48 |
| 600178 | 2017 | -0.28 | 0.02 | 0.693147 | 0.48045301 | 22.06185 | 0.022773 | 51.42 |
| 600726 | 2017 | -0.48 | 0.02 | 0.693147 | 0.48045301 | 23.95758 | -0.4336  | 44.8  |
| 600038 | 2017 | 0.195 | 0.02 | 0.693147 | 0.48045301 | 23.83684 | 0.060563 | 28.21 |
| 2737   | 2017 | 0.547 | 0.02 | 0.693147 | 0.48045301 | 22.22069 | 0.148615 | 41.62 |
| 2737   | 2017 | 0.547 | 0.02 | 0.693147 | 0.48045301 | 22.22069 | 0.148615 | 41.62 |
| 901    | 2017 | 0.568 | 0.02 | 0.693147 | 0.48045301 | 22.55899 | 0.045544 | 16.88 |
| 600038 | 2017 | 0.753 | 0.02 | 0.693147 | 0.48045301 | 23.83684 | 0.060563 | 28.21 |
| 600371 | 2017 | -0.53 | 0.02 | 0.693147 | 0.48045301 | 20.10336 | 0.121958 | 48.76 |
| 600289 | 2017 | 1.521 | 0.02 | 0.693147 | 0.48045301 | 22.13601 | -0.4336  | 32.89 |
| 600666 | 2017 | 0.115 | 0.02 | 0.693147 | 0.48045301 | 22.69459 | -0.00784 | 19    |
| 2437   | 2017 | 0.649 | 0.02 | 0.693147 | 0.48045301 | 22.92759 | 0.071786 | 42.63 |
| 300040 | 2017 | -0.12 | 0.02 | 0.693147 | 0.48045301 | 22.05379 | 0.053657 | 19.75 |
| 2737   | 2017 | 0.645 | 0.02 | 0.693147 | 0.48045301 | 22.22069 | 0.148615 | 41.62 |

|        |      |       |      |          |            |          |          |       |
|--------|------|-------|------|----------|------------|----------|----------|-------|
| 2737   | 2017 | 0.645 | 0.02 | 0.693147 | 0.48045301 | 22.22069 | 0.148615 | 41.62 |
| 600853 | 2017 | -0.69 | 0.02 | 0.693147 | 0.48045301 | 22.8737  | 0.135105 | 33.34 |
| 600289 | 2017 | 1.521 | 0.02 | 0.693147 | 0.48045301 | 21.81595 | -0.4336  | 32.89 |
| 600178 | 2017 | -0.6  | 0.02 | 0.693147 | 0.48045301 | 22.06185 | 0.022773 | 51.42 |
| 600202 | 2017 | -0.36 | 0.02 | 0.693147 | 0.48045301 | 21.22495 | -0.14691 | 34.03 |
| 2437   | 2017 | 0.649 | 0.02 | 0.693147 | 0.48045301 | 22.92759 | 0.071786 | 42.63 |
| 2437   | 2017 | 0.649 | 0.02 | 0.693147 | 0.48045301 | 22.92759 | 0.071786 | 42.63 |
| 711    | 2017 | -0.07 | 0.02 | 0.693147 | 0.48045301 | 22.88804 | 0.06904  | 19.48 |
| 2737   | 2017 | 0.645 | 0.02 | 0.693147 | 0.48045301 | 22.22069 | 0.148615 | 41.62 |
| 901    | 2017 | 0.895 | 0.02 | 0.693147 | 0.48045301 | 22.55899 | 0.045544 | 16.88 |
| 600853 | 2017 | -0.82 | 0.02 | 0.693147 | 0.48045301 | 23.271   | 0.135105 | 33.34 |
| 711    | 2017 | -0.36 | 0.02 | 0.693147 | 0.48045301 | 22.88804 | 0.06904  | 19.48 |
| 600811 | 2017 | 0.339 | 0.02 | 0.693147 | 0.48045301 | 24.15801 | 0.036343 | 16.39 |
| 711    | 2017 | -0.07 | 0.02 | 0.693147 | 0.48045301 | 22.88804 | 0.06904  | 19.48 |
| 600666 | 2017 | 0.986 | 0.02 | 0.693147 | 4.80E-01   | 22.69459 | -0.00784 | 19    |
| 300489 | 2017 | 0.755 | 0.02 | 0.693147 | 4.80E-01   | 20.31115 | 0.02684  | 27.33 |
| 600202 | 2017 | -0.36 | 0.02 | 0.693147 | 4.80E-01   | 21.22495 | -0.14691 | 34.03 |
| 711    | 2017 | -0.13 | 0.02 | 0.693147 | 4.80E-01   | 22.88804 | 0.06904  | 19.48 |
| 600811 | 2017 | 0.339 | 0.02 | 0.693147 | 4.80E-01   | 24.59593 | 0.036343 | 16.39 |
| 600853 | 2017 | -0.82 | 0.02 | 0.693147 | 4.80E-01   | 23.271   | 0.135105 | 33.34 |
| 600701 | 2017 | 0.523 | 0.02 | 0.693147 | 0.48045301 | 23.00565 | -0.15694 | 16.42 |
| 933    | 2017 | -0.95 | 0.02 | 1.95559  | 3.8243317  | 24.25971 | 0.039117 | 24.21 |
| 933    | 2017 | -0.95 | 0.02 | 1.95559  | 3.8243317  | 24.71099 | 0.039117 | 24.21 |
| 933    | 2017 | -0.95 | 0.02 | 1.95559  | 3.8243317  | 24.71099 | 0.039117 | 24.21 |
| 933    | 2017 | -0.62 | 0.02 | 1.95559  | 3.8243317  | 24.71099 | 0.039117 | 24.21 |
| 933    | 2017 | 0.37  | 0.02 | 1.95559  | 3.8243317  | 24.71099 | 0.039117 | 24.21 |
| 933    | 2017 | -0.75 | 0.02 | 1.95559  | 3.8243317  | 24.71099 | 0.039117 | 24.21 |
| 933    | 2017 | -0.69 | 0.02 | 1.95559  | 3.8243317  | 24.71099 | 0.039117 | 24.21 |
| 600307 | 2017 | -0.37 | 0.02 | 1.323243 | 1.750972   | 24.40866 | 0.036157 | 54.79 |
| 2145   | 2017 | 0.291 | 0.02 | 1.323243 | 1.750972   | 22.46357 | 0.129653 | 37.04 |
| 2145   | 2017 | 0.291 | 0.02 | 1.323243 | 1.750972   | 22.46357 | 0.129653 | 37.04 |
| 2145   | 2017 | 0.291 | 0.02 | 1.323243 | 1.750972   | 21.84277 | 0.129653 | 37.04 |
| 600307 | 2017 | -0.37 | 0.02 | 1.323243 | 1.750972   | 24.40866 | 0.036157 | 54.79 |
| 600307 | 2017 | -0.37 | 0.02 | 1.323243 | 1.750972   | 24.40866 | 0.036157 | 54.79 |
| 2145   | 2017 | 0.291 | 0.02 | 1.323243 | 1.750972   | 22.46357 | 0.129653 | 37.04 |
| 600307 | 2017 | -0.22 | 0.02 | 1.323243 | 1.750972   | 24.46993 | 0.036157 | 54.79 |
| 600307 | 2017 | -0.34 | 0.02 | 1.323243 | 1.750972   | 24.40866 | 0.036157 | 54.79 |
| 600307 | 2017 | -0.22 | 0.02 | 1.323243 | 1.750972   | 24.40866 | 0.036157 | 54.79 |
| 600307 | 2017 | -0.37 | 0.02 | 1.323243 | 1.750972   | 24.40866 | 0.036157 | 54.79 |
| 2145   | 2017 | 0.291 | 0.02 | 1.323243 | 1.750972   | 22.46357 | 0.129653 | 37.04 |
| 300254 | 2017 | 0.541 | 0    | 1.239919 | 1.5373994  | 21.14105 | 0.031811 | 11.91 |
| 300254 | 2017 | 0.541 | 0    | 1.239919 | 1.5373994  | 21.14105 | 0.031811 | 11.91 |
| 300254 | 2017 | 0.541 | 0    | 1.239919 | 1.5373994  | 21.14105 | 0.031811 | 11.91 |
| 300254 | 2017 | 0.541 | 0    | 1.239919 | 1.5373994  | 21.14105 | 0.031811 | 11.91 |
| 300254 | 2017 | -0.05 | 0    | 1.239919 | 1.5373994  | 21.14105 | 0.031811 | 11.91 |
| 300254 | 2017 | 0.541 | 0    | 1.239919 | 1.5373994  | 21.14105 | 0.031811 | 11.91 |
| 300254 | 2017 | 0.541 | 0    | 1.239919 | 1.5373994  | 21.14105 | 0.031811 | 11.91 |
| 300254 | 2017 | 0.835 | 0    | 1.239919 | 1.5373994  | 21.14105 | 0.031811 | 11.91 |
| 300254 | 2017 | 0.835 | 0    | 1.239919 | 1.5373994  | 20.81444 | 0.031811 | 11.91 |
| 300254 | 2017 | 0.835 | 0    | 1.239919 | 1.5373994  | 21.14105 | 0.031811 | 11.91 |
| 2185   | 2017 | -0    | 0.02 | 0.510826 | 0.26094302 | 22.9604  | 0.091238 | 25.67 |
| 2772   | 2017 | -0.4  | 0.02 | 0.510826 | 0.26094302 | 22.13219 | 0.054191 | 29.72 |
| 2185   | 2017 | -0.53 | 0.02 | 0.510826 | 0.26094302 | 22.9604  | 0.091238 | 25.67 |
| 2185   | 2017 | -0.09 | 0.02 | 0.510826 | 0.26094302 | 22.9604  | 0.091238 | 25.67 |

|        |      |       |      |          |            |          |          |       |
|--------|------|-------|------|----------|------------|----------|----------|-------|
| 2185   | 2017 | 0.25  | 0.02 | 0.510826 | 0.26094302 | 22.9604  | 0.091238 | 25.67 |
| 2185   | 2017 | 0.261 | 0.02 | 0.510826 | 0.26094302 | 22.9604  | 0.091238 | 25.67 |
| 2185   | 2017 | 0.261 | 0.02 | 0.510826 | 0.26094302 | 22.5768  | 0.091238 | 25.67 |
| 2772   | 2017 | -0.4  | 0.02 | 0.510826 | 0.26094302 | 21.83691 | 0.054191 | 29.72 |
| 2772   | 2017 | -0.4  | 0.02 | 0.510826 | 0.26094302 | 22.13219 | 0.054191 | 29.72 |
| 2185   | 2017 | 0.232 | 0.02 | 0.510826 | 0.26094302 | 22.9604  | 0.091238 | 25.67 |
| 2772   | 2017 | -0.4  | 0.02 | 0.510826 | 0.26094302 | 22.13219 | 0.054191 | 29.72 |
| 2772   | 2017 | -0.4  | 0.02 | 0.510826 | 0.26094302 | 22.13219 | 0.054191 | 29.72 |
| 2772   | 2017 | -0.4  | 0.02 | 0.510826 | 0.26094302 | 22.13219 | 0.054191 | 29.72 |
| 2772   | 2017 | -0.4  | 0.02 | 0.510826 | 0.26094302 | 22.13219 | 0.054191 | 29.72 |
| 2185   | 2017 | 0.291 | 0.02 | 0.510826 | 0.26094302 | 22.9604  | 0.091238 | 25.67 |
| 2185   | 2017 | -0.09 | 0.02 | 0.510826 | 0.26094302 | 22.9604  | 0.091238 | 25.67 |
| 2185   | 2017 | 0.485 | 0.02 | 0.510826 | 0.26094302 | 22.9604  | 0.091238 | 25.67 |
| 2185   | 2017 | -0.09 | 0.02 | 0.510826 | 0.26094302 | 22.9604  | 0.091238 | 25.67 |
| 2185   | 2017 | -0.53 | 0.02 | 0.510826 | 0.26094302 | 22.9604  | 0.091238 | 25.67 |
| 2185   | 2017 | -0.53 | 0.02 | 0.510826 | 0.26094302 | 22.9604  | 0.091238 | 25.67 |
| 795    | 2017 | -0.27 | 0    | 1.2384   | 1.5336339  | 21.68839 | 0.049223 | 39.38 |
| 600495 | 2017 | -0.52 | 0    | 1.2384   | 1.5336339  | 22.06833 | 0.005385 | 30.79 |
| 795    | 2017 | 0.812 | 0    | 1.2384   | 1.5336339  | 21.68839 | 0.049223 | 39.38 |
| 2640   | 2017 | -0.71 | 0    | 1.2384   | 1.5336339  | 22.41927 | 0.155823 | 19.74 |
| 825    | 2017 | -0.64 | 0    | 1.2384   | 1.5336339  | 25.03401 | 0.159794 | 62.7  |
| 600169 | 2017 | 0.548 | 0    | 1.2384   | 1.5336339  | 24.1379  | 0.012348 | 25.84 |
| 600169 | 2017 | 0.327 | 0    | 1.2384   | 1.5336339  | 24.1379  | 0.012348 | 25.84 |
| 600169 | 2017 | 0.548 | 0    | 1.2384   | 1.5336339  | 24.1379  | 0.012348 | 25.84 |
| 983    | 2017 | -0.38 | 0    | 1.2384   | 1.5336339  | 24.78123 | 0.086711 | 54.4  |
| 600546 | 2017 | -0.78 | 0    | 1.2384   | 1.5336339  | 24.54969 | 0.122003 | 57.43 |
| 600169 | 2017 | 0.106 | 0    | 1.2384   | 1.5336339  | 24.1379  | 0.012348 | 25.84 |
| 600169 | 2017 | 0.636 | 0    | 1.2384   | 1.5336339  | 24.1379  | 0.012348 | 25.84 |
| 600546 | 2017 | -0.97 | 0    | 1.2384   | 1.5336339  | 24.31348 | 0.122003 | 57.43 |
| 600546 | 2017 | -0.97 | 0    | 1.2384   | 1.5336339  | 24.54969 | 0.122003 | 57.43 |
| 795    | 2017 | 0.812 | 0    | 1.2384   | 1.5336339  | 21.68839 | 0.049223 | 39.38 |
| 795    | 2017 | 0.149 | 0    | 1.2384   | 1.5336339  | 21.68839 | 0.049223 | 39.38 |
| 600546 | 2017 | -0.97 | 0    | 1.2384   | 1.5336339  | 24.54969 | 0.122003 | 57.43 |
| 600169 | 2017 | 0.401 | 0    | 1.2384   | 1.5336339  | 24.1379  | 0.012348 | 25.84 |
| 2640   | 2017 | -0.71 | 0    | 1.2384   | 1.5336339  | 22.87514 | 0.155823 | 19.74 |
| 795    | 2017 | 0.812 | 0    | 1.2384   | 1.5336339  | 21.68839 | 0.049223 | 39.38 |
| 968    | 2017 | 0.041 | 0    | 1.2384   | 1.5336339  | 22.71833 | 0.145775 | 40.05 |
| 983    | 2017 | -0.88 | 0    | 1.2384   | 1.5336339  | 24.0566  | 0.086711 | 54.4  |
| 795    | 2017 | -0.18 | 0    | 1.2384   | 1.5336339  | 21.68839 | 0.049223 | 39.38 |
| 983    | 2017 | -0.36 | 0    | 1.2384   | 1.5336339  | 24.78123 | 0.086711 | 54.4  |
| 795    | 2017 | 0.812 | 0    | 1.2384   | 1.5336339  | 21.68839 | 0.049223 | 39.38 |
| 968    | 2017 | 0.041 | 0    | 1.2384   | 1.5336339  | 22.71833 | 0.145775 | 40.05 |
| 403    | 2017 | 0.633 | 0    | 1.2384   | 1.5336339  | 21.00134 | 0.028118 | 27.49 |
| 600495 | 2017 | -0.65 | 0    | 1.2384   | 1.5336339  | 22.06833 | 0.005385 | 30.79 |
| 600495 | 2017 | -0.46 | 0    | 1.2384   | 1.5336339  | 22.06833 | 0.005385 | 30.79 |
| 600169 | 2017 | 0.548 | 0    | 1.2384   | 1.5336339  | 23.91309 | 0.012348 | 25.84 |
| 300486 | 2017 | 0.109 | 0    | 1.2384   | 1.5336339  | 20.76153 | 0.054695 | 36.14 |
| 983    | 2017 | -0.38 | 0    | 1.2384   | 1.5336339  | 24.0566  | 0.086711 | 54.4  |
| 600546 | 2017 | -0.97 | 0    | 1.2384   | 1.5336339  | 24.54969 | 0.122003 | 57.43 |
| 300486 | 2017 | 0.109 | 0    | 1.2384   | 1.5336339  | 20.86371 | 0.054695 | 36.14 |
| 825    | 2017 | 0.272 | 0    | 1.2384   | 1.5336339  | 25.03401 | 0.159794 | 62.7  |
| 795    | 2017 | -0.22 | 0    | 1.2384   | 1.5336339  | 21.68839 | 0.049223 | 39.38 |
| 795    | 2017 | -0.18 | 0    | 1.2384   | 1.5336339  | 21.68839 | 0.049223 | 39.38 |
| 600546 | 2017 | -0.78 | 0    | 1.2384   | 1.5336339  | 24.54969 | 0.122003 | 57.43 |

|        |      |       |      |          |           |          |          |       |
|--------|------|-------|------|----------|-----------|----------|----------|-------|
| 825    | 2017 | 0.258 | 0    | 1.2384   | 1.5336339 | 24.99148 | 0.159794 | 62.7  |
| 600495 | 2017 | -0.65 | 0    | 1.2384   | 1.5336339 | 22.06833 | 0.005385 | 30.79 |
| 795    | 2017 | -0.24 | 0    | 1.2384   | 1.5336339 | 21.68839 | 0.049223 | 39.38 |
| 795    | 2017 | 0.149 | 0    | 1.2384   | 1.5336339 | 21.32862 | 0.049223 | 39.38 |
| 403    | 2017 | 0.633 | 0    | 1.2384   | 1.5336339 | 20.10336 | 0.028118 | 27.49 |
| 795    | 2017 | 0.812 | 0    | 1.2384   | 1.5336339 | 21.68839 | 0.049223 | 39.38 |
| 795    | 2017 | 0.812 | 0    | 1.2384   | 1.5336339 | 21.68839 | 0.049223 | 39.38 |
| 300486 | 2017 | 0.109 | 0    | 1.2384   | 1.5336339 | 20.86371 | 0.054695 | 36.14 |
| 403    | 2017 | 0.633 | 0    | 1.2384   | 1.5336339 | 21.00134 | 0.028118 | 27.49 |
| 600546 | 2017 | -0.5  | 0    | 1.2384   | 1.5336339 | 24.54969 | 0.122003 | 57.43 |
| 825    | 2017 | 0.272 | 0    | 1.2384   | 1.5336339 | 25.03401 | 0.159794 | 62.7  |
| 600495 | 2017 | -0.65 | 0    | 1.2384   | 1.5336339 | 22.06833 | 0.005385 | 30.79 |
| 968    | 2017 | 0.041 | 0    | 1.2384   | 1.5336339 | 22.71833 | 0.145775 | 40.05 |
| 600546 | 2017 | -0.97 | 0    | 1.2384   | 1.5336339 | 24.54969 | 0.122003 | 57.43 |
| 968    | 2017 | 0.041 | 0    | 1.2384   | 1.5336339 | 22.11596 | 0.145775 | 40.05 |
| 795    | 2017 | 0.45  | 0    | 1.2384   | 1.5336339 | 21.68839 | 0.049223 | 39.38 |
| 600546 | 2017 | -0.97 | 0    | 1.2384   | 1.5336339 | 24.54969 | 0.122003 | 57.43 |
| 600495 | 2017 | -0.65 | 0    | 1.2384   | 1.5336339 | 22.06833 | 0.005385 | 30.79 |
| 825    | 2017 | -0.64 | 0    | 1.2384   | 1.5336339 | 25.03401 | 0.159794 | 62.7  |
| 968    | 2017 | 0.041 | 0    | 1.2384   | 1.5336339 | 22.71833 | 0.145775 | 40.05 |
| 600546 | 2017 | -0.97 | 0    | 1.2384   | 1.5336339 | 24.54969 | 0.122003 | 57.43 |
| 600546 | 2017 | -0.97 | 0    | 1.2384   | 1.5336339 | 24.54969 | 0.122003 | 57.43 |
| 600495 | 2017 | -0.43 | 0    | 1.2384   | 1.5336339 | 21.82474 | 0.005385 | 30.79 |
| 2640   | 2017 | -0.71 | 0    | 1.2384   | 1.5336339 | 22.87514 | 0.155823 | 19.74 |
| 600546 | 2017 | -0.97 | 0    | 1.2384   | 1.5336339 | 24.54969 | 0.122003 | 57.43 |
| 600169 | 2017 | 0.327 | 0    | 1.2384   | 1.5336339 | 24.1379  | 0.012348 | 25.84 |
| 403    | 2017 | 0.633 | 0    | 1.2384   | 1.5336339 | 21.00134 | 0.028118 | 27.49 |
| 707    | 2017 | 0.604 | 0.03 | 0.104313 | 1.09E-02  | 22.98887 | -0.4336  | 25.11 |
| 300387 | 2017 | 1.139 | 0.03 | 0.104313 | 1.09E-02  | 20.67993 | 0.079354 | 32.09 |
| 707    | 2017 | 0.604 | 0.03 | 0.104313 | 1.09E-02  | 22.98887 | -0.4336  | 25.11 |
| 707    | 2017 | 0.604 | 0.03 | 0.104313 | 1.09E-02  | 22.98887 | -0.4336  | 25.11 |
| 707    | 2017 | 0.604 | 0.03 | 0.104313 | 1.09E-02  | 22.98887 | -0.4336  | 25.11 |
| 300387 | 2017 | 0.791 | 0.03 | 0.104313 | 1.09E-02  | 20.90599 | 0.079354 | 32.09 |
| 707    | 2017 | 0.604 | 0.03 | 0.104313 | 1.09E-02  | 22.98887 | -0.4336  | 25.11 |
| 300387 | 2017 | 0.792 | 0.03 | 0.104313 | 1.09E-02  | 20.90599 | 0.079354 | 32.09 |
| 707    | 2017 | 0.604 | 0.03 | 0.104313 | 1.09E-02  | 22.42776 | -0.4336  | 25.11 |
| 300387 | 2017 | 0.791 | 0.03 | 0.104313 | 1.09E-02  | 20.90599 | 0.079354 | 32.09 |
| 300387 | 2017 | 0.698 | 0.03 | 0.104313 | 1.09E-02  | 20.90599 | 0.079354 | 32.09 |
| 300387 | 2017 | 0.808 | 0.03 | 0.104313 | 1.09E-02  | 20.90599 | 0.079354 | 32.09 |
| 603663 | 2017 | -0.02 | 0.03 | 1.114168 | 1.24E+00  | 20.15251 | 0.115506 | 25.14 |
| 300436 | 2017 | 1.692 | 0.03 | 1.114168 | 1.24E+00  | 20.41738 | 0.060801 | 24.73 |
| 603663 | 2017 | -0.2  | 0.03 | 1.114168 | 1.24E+00  | 20.16744 | 0.115506 | 25.14 |
| 603663 | 2017 | -0.6  | 0.03 | 1.114168 | 1.24E+00  | 20.16744 | 0.115506 | 25.14 |
| 300436 | 2017 | 1.692 | 0.03 | 1.114168 | 1.24E+00  | 20.41738 | 0.060801 | 24.73 |
| 603663 | 2017 | -0.6  | 0.03 | 1.114168 | 1.24E+00  | 20.16744 | 0.115506 | 25.14 |
| 300436 | 2017 | 1.692 | 0.03 | 1.114168 | 1.24E+00  | 20.42771 | 0.060801 | 24.73 |
| 603663 | 2017 | -0.02 | 0.03 | 1.114168 | 1.2413711 | 20.16744 | 0.115506 | 25.14 |
| 850    | 2017 | -0.06 | 0.04 | 1.400255 | 1.9607139 | 22.78658 | 0.017718 | 46.4  |
| 850    | 2017 | -0.1  | 0.04 | 1.400255 | 1.9607139 | 22.78658 | 0.017718 | 46.4  |
| 850    | 2017 | -0.1  | 0.04 | 1.400255 | 1.9607139 | 22.78658 | 0.017718 | 46.4  |
| 850    | 2017 | -0.05 | 0.04 | 1.400255 | 1.9607139 | 22.74394 | 0.017718 | 46.4  |
| 300090 | 2017 | -0.36 | 0.04 | 1.400255 | 1.9607139 | 23.3341  | -0.33972 | 13.69 |
| 300090 | 2017 | -0.36 | 0.04 | 1.400255 | 1.9607139 | 23.3341  | -0.33972 | 13.69 |
| 300090 | 2017 | -0.36 | 0.04 | 1.400255 | 1.9607139 | 23.3341  | -0.33972 | 13.69 |



|        |      |       |      |          |            |          |          |       |
|--------|------|-------|------|----------|------------|----------|----------|-------|
| 300090 | 2017 | -0.19 | 0.04 | 1.400255 | 1.9607139  | 23.3341  | -0.33972 | 13.69 |
| 850    | 2017 | -0.1  | 0.04 | 1.400255 | 1.9607139  | 22.78658 | 0.017718 | 46.4  |
| 300090 | 2017 | -0.38 | 0.04 | 1.400255 | 1.9607139  | 23.3341  | -0.33972 | 13.69 |
| 300090 | 2017 | -0.34 | 0.04 | 1.400255 | 1.9607139  | 23.3341  | -0.33972 | 13.69 |
| 850    | 2017 | -0.05 | 0.04 | 1.400255 | 1.9607139  | 22.78658 | 0.017718 | 46.4  |
| 300090 | 2017 | -0.19 | 0.04 | 1.400255 | 1.9607139  | 23.3341  | -0.33972 | 13.69 |
| 300090 | 2017 | -0.19 | 0.04 | 1.400255 | 1.9607139  | 23.3341  | -0.33972 | 13.69 |
| 850    | 2017 | -0.1  | 0.04 | 1.400255 | 1.9607139  | 22.78658 | 0.017718 | 46.4  |
| 300090 | 2017 | -0.19 | 0.04 | 1.400255 | 1.9607139  | 23.3341  | -0.33972 | 13.69 |
| 300090 | 2017 | 0.63  | 0.04 | 1.400255 | 1.9607139  | 23.12184 | -0.33972 | 13.69 |
| 850    | 2017 | 0.121 | 0.04 | 1.400255 | 1.9607139  | 22.78658 | 0.017718 | 46.4  |
| 850    | 2017 | -0.05 | 0.04 | 1.400255 | 1.9607139  | 22.78658 | 0.017718 | 46.4  |
| 850    | 2017 | -0.01 | 0.04 | 1.400255 | 1.9607139  | 22.78658 | 0.017718 | 46.4  |
| 300090 | 2017 | -0.33 | 0.04 | 1.400255 | 1.9607139  | 23.3341  | -0.33972 | 13.69 |
| 600569 | 2017 | -0.27 | 0.02 | 0.441021 | 0.19449933 | 24.22439 | 0.237685 | 60.14 |
| 2535   | 2017 | -0.35 | 0.02 | 0.441021 | 0.19449933 | 22.76741 | 0.012293 | 29.78 |
| 2535   | 2017 | -0.68 | 0.02 | 0.441021 | 0.19449933 | 22.76741 | 0.012293 | 29.78 |
| 600569 | 2017 | -0.27 | 0.02 | 0.441021 | 0.19449933 | 24.22439 | 0.237685 | 60.14 |
| 600207 | 2017 | -0.96 | 0.02 | 0.441021 | 0.19449933 | 21.56827 | 0.006739 | 47.26 |
| 600207 | 2017 | -0.96 | 0.02 | 0.441021 | 0.19449933 | 21.56827 | 0.006739 | 47.26 |
| 600207 | 2017 | -0.96 | 0.02 | 0.441021 | 0.19449933 | 21.56827 | 0.006739 | 47.26 |
| 2535   | 2017 | -0.68 | 0.02 | 0.441021 | 0.19449933 | 22.58371 | 0.012293 | 29.78 |
| 2535   | 2017 | -0.4  | 0.02 | 0.441021 | 0.19449933 | 22.76741 | 0.012293 | 29.78 |
| 600569 | 2017 | -0.27 | 0.02 | 0.441021 | 0.19449933 | 24.16648 | 0.237685 | 60.14 |
| 2535   | 2017 | -0.68 | 0.02 | 0.441021 | 0.19449933 | 22.76741 | 0.012293 | 29.78 |
| 2535   | 2017 | -0.68 | 0.02 | 0.441021 | 0.19449933 | 22.76741 | 0.012293 | 29.78 |
| 600207 | 2017 | -0.96 | 0.02 | 0.441021 | 0.19449933 | 21.5217  | 0.006739 | 47.26 |
| 2535   | 2017 | -0.68 | 0.02 | 0.441021 | 0.19449933 | 22.76741 | 0.012293 | 29.78 |
| 600207 | 2017 | -0.96 | 0.02 | 0.441021 | 0.19449933 | 21.56827 | 0.006739 | 47.26 |
| 2535   | 2017 | -0.36 | 0.02 | 0.441021 | 0.19449933 | 22.76741 | 0.012293 | 29.78 |
| 2535   | 2017 | -0.68 | 0.02 | 0.441021 | 0.19449933 | 22.76741 | 0.012293 | 29.78 |
| 2535   | 2017 | 0.645 | 0.02 | 0.441021 | 0.19449933 | 22.76741 | 0.012293 | 29.78 |
| 600207 | 2017 | -0.96 | 0.02 | 0.441021 | 0.19449933 | 21.56827 | 0.006739 | 47.26 |
| 2535   | 2017 | -0.68 | 0.02 | 0.441021 | 0.19449933 | 22.76741 | 0.012293 | 29.78 |
| 600207 | 2017 | -0.96 | 0.02 | 0.441021 | 0.19449933 | 21.56827 | 0.006739 | 47.26 |
| 826    | 2017 | -0.14 | 0.03 | 1.697509 | 2.8815357  | 23.98225 | 0.084187 | 16.56 |
| 600141 | 2017 | 0.231 | 0.03 | 1.697509 | 2.8815357  | 23.80257 | 0.084581 | 25.18 |
| 600298 | 2017 | -0.68 | 0.03 | 1.697509 | 2.8815357  | 22.80612 | 0.218069 | 39.98 |
| 600141 | 2017 | -0.23 | 0.03 | 1.697509 | 2.8815357  | 23.80257 | 0.084581 | 25.18 |
| 826    | 2017 | -0.84 | 0.03 | 1.697509 | 2.8815357  | 24.22929 | 0.084187 | 16.56 |
| 422    | 2017 | 0.478 | 0.03 | 1.697509 | 2.8815357  | 24.20608 | -0.4336  | 17.08 |
| 422    | 2017 | -0.85 | 0.03 | 1.697509 | 2.8815357  | 24.20608 | -0.4336  | 17.08 |
| 600141 | 2017 | -0.25 | 0.03 | 1.697509 | 2.8815357  | 23.80257 | 0.084581 | 25.18 |
| 422    | 2017 | 0.478 | 0.03 | 1.697509 | 2.8815357  | 24.20608 | -0.4336  | 17.08 |
| 600141 | 2017 | -0.5  | 0.03 | 1.697509 | 2.8815357  | 23.80257 | 0.084581 | 25.18 |
| 826    | 2017 | -0.18 | 0.03 | 1.697509 | 2.8815357  | 24.22929 | 0.084187 | 16.56 |
| 600141 | 2017 | -0.5  | 0.03 | 1.697509 | 2.8815357  | 23.80257 | 0.084581 | 25.18 |
| 600298 | 2017 | -0.41 | 0.03 | 1.697509 | 2.8815357  | 22.80612 | 0.218069 | 39.98 |
| 422    | 2017 | 0.478 | 0.03 | 1.697509 | 2.8815357  | 24.20608 | -0.4336  | 17.08 |
| 826    | 2017 | -0.14 | 0.03 | 1.697509 | 2.8815357  | 24.22929 | 0.084187 | 16.56 |
| 826    | 2017 | -0.14 | 0.03 | 1.697509 | 2.8815357  | 24.22929 | 0.084187 | 16.56 |
| 600141 | 2017 | -0.25 | 0.03 | 1.697509 | 2.8815357  | 23.38513 | 0.084581 | 25.18 |
| 600141 | 2017 | 0.165 | 0.03 | 1.697509 | 2.8815357  | 23.80257 | 0.084581 | 25.18 |
| 600141 | 2017 | -0.17 | 0.03 | 1.697509 | 2.8815357  | 23.80257 | 0.084581 | 25.18 |

|        |      |       |      |          |           |          |          |       |
|--------|------|-------|------|----------|-----------|----------|----------|-------|
| 826    | 2017 | -0.18 | 0.03 | 1.697509 | 2.8815357 | 24.22929 | 0.084187 | 16.56 |
| 600141 | 2017 | -0.5  | 0.03 | 1.697509 | 2.8815357 | 23.80257 | 0.084581 | 25.18 |
| 826    | 2017 | -0.14 | 0.03 | 1.697509 | 2.8815357 | 24.22929 | 0.084187 | 16.56 |
| 826    | 2017 | -0.14 | 0.03 | 1.697509 | 2.8815357 | 24.22929 | 0.084187 | 16.56 |
| 826    | 2017 | -0.13 | 0.03 | 1.697509 | 2.8815357 | 24.22929 | 0.084187 | 16.56 |
| 600298 | 2017 | -0.57 | 0.03 | 1.697509 | 2.8815357 | 22.80612 | 0.218069 | 39.98 |
| 826    | 2017 | -0.07 | 0.03 | 1.697509 | 2.8815357 | 24.22929 | 0.084187 | 16.56 |
| 600298 | 2017 | -0.57 | 0.03 | 1.697509 | 2.8815357 | 22.80612 | 0.218069 | 39.98 |
| 422    | 2017 | 0.478 | 0.03 | 1.697509 | 2.8815357 | 24.20608 | -0.4336  | 17.08 |
| 422    | 2017 | 0.478 | 0.03 | 1.697509 | 2.8815357 | 23.58817 | -0.4336  | 17.08 |
| 600298 | 2017 | -0.57 | 0.03 | 1.697509 | 2.8815357 | 22.80612 | 0.218069 | 39.98 |
| 600298 | 2017 | -0.62 | 0.03 | 1.697509 | 2.8815357 | 22.6974  | 0.218069 | 39.98 |
| 826    | 2017 | -0.84 | 0.03 | 1.697509 | 2.8815357 | 24.22929 | 0.084187 | 16.56 |
| 826    | 2017 | 0.084 | 0.03 | 1.697509 | 2.8815357 | 24.22929 | 0.084187 | 16.56 |
| 422    | 2017 | 0.478 | 0.03 | 1.697509 | 2.8815357 | 24.20608 | -0.4336  | 17.08 |
| 422    | 2017 | 0.478 | 0.03 | 1.697509 | 2.8815357 | 24.20608 | -0.4336  | 17.08 |
| 422    | 2017 | -0.52 | 0.03 | 1.697509 | 2.8815357 | 24.20608 | -0.4336  | 17.08 |
| 600141 | 2017 | -0.29 | 0.03 | 1.697509 | 2.8815357 | 23.80257 | 0.084581 | 25.18 |
| 600298 | 2017 | -0.61 | 0.03 | 1.697509 | 2.8815357 | 22.80612 | 0.218069 | 39.98 |
| 600141 | 2017 | -0.33 | 0.03 | 1.697509 | 2.8815357 | 23.80257 | 0.084581 | 25.18 |
| 600141 | 2017 | 0.496 | 0.03 | 1.697509 | 2.8815357 | 23.80257 | 0.084581 | 25.18 |
| 826    | 2017 | -0.07 | 0.03 | 1.697509 | 2.8815357 | 24.22929 | 0.084187 | 16.56 |
| 600141 | 2017 | -0.56 | 0.03 | 1.697509 | 2.8815357 | 23.80257 | 0.084581 | 25.18 |
| 600298 | 2017 | -0.57 | 0.03 | 1.697509 | 2.8815357 | 22.80612 | 0.218069 | 39.98 |
| 422    | 2017 | 0.478 | 0.03 | 1.697509 | 2.8815357 | 24.20608 | -0.4336  | 17.08 |
| 422    | 2017 | 0.478 | 0.03 | 1.697509 | 2.8815357 | 24.20608 | -0.4336  | 17.08 |
| 422    | 2017 | 0.478 | 0.03 | 1.697509 | 2.8815357 | 24.20608 | -0.4336  | 17.08 |
| 422    | 2017 | 0.289 | 0.03 | 1.697509 | 2.8815357 | 24.20608 | -0.4336  | 17.08 |
| 422    | 2017 | 0.478 | 0.03 | 1.697509 | 2.8815357 | 24.20608 | -0.4336  | 17.08 |
| 600298 | 2017 | -0.57 | 0.03 | 1.697509 | 2.8815357 | 22.80612 | 0.218069 | 39.98 |
| 600298 | 2017 | -0.68 | 0.03 | 1.697509 | 2.8815357 | 22.80612 | 0.218069 | 39.98 |
| 600141 | 2017 | -0.3  | 0.03 | 1.697509 | 2.8815357 | 23.80257 | 0.084581 | 25.18 |
| 826    | 2017 | -0.14 | 0.03 | 1.697509 | 2.8815357 | 24.22929 | 0.084187 | 16.56 |
| 826    | 2017 | -0.25 | 0.03 | 1.697509 | 2.8815357 | 24.22929 | 0.084187 | 16.56 |
| 300095 | 2017 | -0.58 | 0.03 | 1.508946 | 2.2769173 | 21.69324 | 0.042009 | 21.57 |
| 300095 | 2017 | -0.35 | 0.03 | 1.508946 | 2.2769173 | 21.69324 | 0.042009 | 21.57 |
| 300095 | 2017 | -0.25 | 0.03 | 1.508946 | 2.2769173 | 21.69324 | 0.042009 | 21.57 |
| 2176   | 2017 | 0.186 | 0.03 | 1.508946 | 2.2769173 | 22.94097 | 0.067226 | 16.4  |
| 300095 | 2017 | -0.2  | 0.03 | 1.508946 | 2.2769173 | 21.69324 | 0.042009 | 21.57 |
| 2176   | 2017 | -0.3  | 0.03 | 1.508946 | 2.2769173 | 22.94097 | 0.067226 | 16.4  |
| 2176   | 2017 | -0.59 | 0.03 | 1.508946 | 2.2769173 | 22.59023 | 0.067226 | 16.4  |
| 2176   | 2017 | 0.734 | 0.03 | 1.508946 | 2.2769173 | 22.94097 | 0.067226 | 16.4  |
| 300095 | 2017 | -0.35 | 0.03 | 1.508946 | 2.2769173 | 21.69324 | 0.042009 | 21.57 |
| 2176   | 2017 | 0.186 | 0.03 | 1.508946 | 2.2769173 | 22.94097 | 0.067226 | 16.4  |
| 2176   | 2017 | -0.5  | 0.03 | 1.508946 | 2.2769173 | 22.94097 | 0.067226 | 16.4  |
| 300095 | 2017 | -0.38 | 0.03 | 1.508946 | 2.2769173 | 21.69324 | 0.042009 | 21.57 |
| 300095 | 2017 | -0.35 | 0.03 | 1.508946 | 2.2769173 | 21.69324 | 0.042009 | 21.57 |
| 2176   | 2017 | 0.186 | 0.03 | 1.508946 | 2.2769173 | 22.94097 | 0.067226 | 16.4  |
| 300095 | 2017 | -0.58 | 0.03 | 1.508946 | 2.2769173 | 21.69324 | 0.042009 | 21.57 |
| 300095 | 2017 | -0.25 | 0.03 | 1.508946 | 2.2769173 | 21.69324 | 0.042009 | 21.57 |
| 2176   | 2017 | -0.3  | 0.03 | 1.508946 | 2.2769173 | 22.94097 | 0.067226 | 16.4  |
| 300095 | 2017 | -0.3  | 0.03 | 1.508946 | 2.28E+00  | 21.69324 | 0.042009 | 21.57 |
| 2176   | 2017 | -0.59 | 0.03 | 1.508946 | 2.28E+00  | 22.94097 | 0.067226 | 16.4  |
| 2176   | 2017 | 0.186 | 0.03 | 1.508946 | 2.28E+00  | 22.94097 | 0.067226 | 16.4  |

|        |      |       |      |          |            |          |          |         |
|--------|------|-------|------|----------|------------|----------|----------|---------|
| 2176   | 2017 | 0.734 | 0.03 | 1.508946 | 2.28E+00   | 22.94097 | 0.067226 | 16.4    |
| 2176   | 2017 | 0.186 | 0.03 | 1.508946 | 2.28E+00   | 22.94097 | 0.067226 | 16.4    |
| 300095 | 2017 | -0.35 | 0.03 | 1.508946 | 2.28E+00   | 21.60544 | 0.042009 | 21.57   |
| 561    | 2017 | 1.127 | 0.04 | 0.797482 | 6.36E-01   | 21.74429 | 0.063458 | 41.73   |
| 837    | 2017 | -0.57 | 0.04 | 0.797482 | 6.36E-01   | 22.88668 | 0.01059  | 15.94   |
| 600456 | 2017 | 0.547 | 0.04 | 0.797482 | 6.36E-01   | 22.65474 | 0.009359 | 53.04   |
| 600379 | 2017 | -0.02 | 0.04 | 0.797482 | 6.36E-01   | 20.31973 | 0.072654 | 26.96   |
| 561    | 2017 | 0.82  | 0.04 | 0.797482 | 6.36E-01   | 21.74429 | 0.063458 | 41.73   |
| 837    | 2017 | 0.014 | 0.04 | 0.797482 | 0.63597677 | 22.88668 | 0.01059  | 15.94   |
| 837    | 2017 | -0.09 | 0.04 | 0.797482 | 0.63597677 | 22.88668 | 0.01059  | 15.94   |
| 837    | 2017 | 0.097 | 0.04 | 0.797482 | 0.63597677 | 22.88668 | 0.01059  | 15.94   |
| 837    | 2017 | -0.12 | 0.04 | 0.797482 | 0.63597677 | 22.22495 | 0.01059  | 15.94   |
| 837    | 2017 | -0.57 | 0.04 | 0.797482 | 0.63597677 | 22.88668 | 0.01059  | 15.94   |
| 600379 | 2017 | -0.69 | 0.04 | 0.797482 | 6.36E-01   | 20.37756 | 0.072654 | 26.96   |
| 561    | 2017 | 1.122 | 0.04 | 0.797482 | 6.36E-01   | 21.74429 | 0.063458 | 41.73   |
| 561    | 2017 | 0.82  | 0.04 | 0.797482 | 6.36E-01   | 21.6008  | 0.063458 | 41.73   |
| 561    | 2017 | 1.134 | 0.04 | 0.797482 | 6.36E-01   | 21.74429 | 0.063458 | 41.73   |
| 837    | 2017 | -0.57 | 0.04 | 0.797482 | 6.36E-01   | 22.88668 | 0.01059  | 15.94   |
| 600379 | 2017 | -0.24 | 0.04 | 0.797482 | 6.36E-01   | 20.37756 | 0.072654 | 26.96   |
| 600379 | 2017 | -0.69 | 0.04 | 0.797482 | 6.36E-01   | 20.37756 | 0.072654 | 26.96   |
| 600456 | 2017 | 0.547 | 0.04 | 0.797482 | 6.36E-01   | 22.65474 | 0.009359 | 53.04   |
| 600456 | 2017 | 0.547 | 0.04 | 0.797482 | 6.36E-01   | 22.65474 | 0.009359 | 53.04   |
| 561    | 2017 | 1.134 | 0.04 | 0.797482 | 6.36E-01   | 21.74429 | 0.063458 | 41.73   |
| 837    | 2017 | -0.57 | 0.04 | 0.797482 | 6.36E-01   | 22.88668 | 0.01059  | 15.94   |
| 837    | 2017 | 0.759 | 0.04 | 0.797482 | 6.36E-01   | 22.88668 | 0.01059  | 15.94   |
| 561    | 2017 | 0.6   | 0.04 | 0.797482 | 6.36E-01   | 21.74429 | 0.063458 | 41.73   |
| 837    | 2017 | -0.57 | 0.04 | 0.797482 | 6.36E-01   | 22.88668 | 0.01059  | 15.94   |
| 837    | 2017 | -0.57 | 0.04 | 0.797482 | 0.63597677 | 22.88668 | 0.01059  | 15.94   |
| 837    | 2017 | -0.04 | 0.04 | 0.797482 | 0.63597677 | 22.88668 | 0.01059  | 15.94   |
| 600456 | 2017 | 0.547 | 0.04 | 0.797482 | 0.63597677 | 22.55848 | 0.009359 | 53.04   |
| 837    | 2017 | -0.57 | 0.04 | 0.797482 | 0.63597677 | 22.88668 | 0.01059  | 15.94   |
| 837    | 2017 | 0.229 | 0.04 | 0.797482 | 0.63597677 | 22.88668 | 0.01059  | 15.94   |
| 600379 | 2017 | -0.02 | 0.04 | 0.797482 | 0.63597677 | 20.37756 | 0.072654 | 26.96   |
| 600456 | 2017 | 0.547 | 0.04 | 0.797482 | 0.63597677 | 22.65474 | 0.009359 | 53.04   |
| 837    | 2017 | -0.57 | 0.04 | 0.797482 | 0.63597677 | 22.88668 | 0.01059  | 15.94   |
| 837    | 2017 | 0.229 | 0.04 | 0.797482 | 0.63597677 | 22.88668 | 0.01059  | 15.94   |
| 561    | 2017 | 0.82  | 0.04 | 0.797482 | 0.63597677 | 21.74429 | 0.063458 | 41.73   |
| 561    | 2017 | 1.483 | 0.04 | 0.797482 | 0.63597677 | 21.74429 | 0.063458 | 41.73   |
| 600456 | 2017 | 0.547 | 0.04 | 0.797482 | 0.63597677 | 22.65474 | 0.009359 | 53.04   |
| 837    | 2017 | -0.57 | 0.04 | 0.797482 | 0.63597677 | 22.88668 | 0.01059  | 15.94   |
| 2817   | 2017 | 0.68  | 0.04 | 0.060161 | 0.0036194  | 20.42045 | 0.069689 | 40.56   |
| 2226   | 2017 | -0.26 | 0.04 | 0.060161 | 0.0036194  | 22.35781 | 0.029543 | 28.85   |
| 300475 | 2017 | -0.72 | 0.04 | 0.060161 | 0.0036194  | 21.14275 | 0.070393 | 27.47   |
| 887    | 2017 | 0.144 | 0.04 | 0.060161 | 0.0036194  | 23.45429 | 0.14854  | 45.62   |
| 603599 | 2017 | 0.376 | 0.04 | 0.060161 | 0.0036194  | 22.42661 | 0.081686 | 42.0634 |
| 2226   | 2017 | 0.622 | 0.04 | 0.060161 | 0.0036194  | 22.35781 | 0.029543 | 28.85   |
| 887    | 2017 | -0.56 | 0.04 | 0.060161 | 0.0036194  | 23.45429 | 0.14854  | 45.62   |
| 2226   | 2017 | -0.12 | 0.04 | 0.060161 | 0.0036194  | 22.35781 | 0.029543 | 28.85   |
| 887    | 2017 | -0.56 | 0.04 | 0.060161 | 0.0036194  | 23.45429 | 0.14854  | 45.62   |
| 2817   | 2017 | 0.68  | 0.04 | 0.060161 | 0.0036194  | 20.42045 | 0.069689 | 40.56   |
| 2226   | 2017 | -0.7  | 0.04 | 0.060161 | 0.0036194  | 22.35781 | 0.029543 | 28.85   |
| 2226   | 2017 | -0.26 | 0.04 | 0.060161 | 0.0036194  | 22.35781 | 0.029543 | 28.85   |
| 603599 | 2017 | 0.368 | 0.04 | 0.060161 | 0.0036194  | 22.42661 | 0.081686 | 42.0634 |
| 2226   | 2017 | -0.7  | 0.04 | 0.060161 | 0.0036194  | 22.35781 | 0.029543 | 28.85   |

|        |      |       |      |          |            |          |          |         |
|--------|------|-------|------|----------|------------|----------|----------|---------|
| 887    | 2017 | 0.127 | 0.04 | 0.060161 | 0.0036194  | 23.45429 | 0.14854  | 45.62   |
| 2226   | 2017 | -0.7  | 0.04 | 0.060161 | 0.0036194  | 22.12512 | 0.029543 | 28.85   |
| 300475 | 2017 | -0.61 | 0.04 | 0.060161 | 0.0036194  | 21.10722 | 0.070393 | 27.47   |
| 300475 | 2017 | -0.61 | 0.04 | 0.060161 | 0.0036194  | 21.14275 | 0.070393 | 27.47   |
| 300475 | 2017 | -0.72 | 0.04 | 0.060161 | 0.0036194  | 21.14275 | 0.070393 | 27.47   |
| 887    | 2017 | 0.034 | 0.04 | 0.060161 | 0.0036194  | 23.45429 | 0.14854  | 45.62   |
| 2226   | 2017 | -0.7  | 0.04 | 0.060161 | 0.0036194  | 22.35781 | 0.029543 | 28.85   |
| 887    | 2017 | -0.56 | 0.04 | 0.060161 | 0.0036194  | 23.45429 | 0.14854  | 45.62   |
| 887    | 2017 | 0.32  | 0.04 | 0.060161 | 0.0036194  | 23.45429 | 0.14854  | 45.62   |
| 2226   | 2017 | -0.7  | 0.04 | 0.060161 | 0.0036194  | 22.35781 | 0.029543 | 28.85   |
| 887    | 2017 | 0.039 | 0.04 | 0.060161 | 0.0036194  | 23.45429 | 0.14854  | 45.62   |
| 2817   | 2017 | 0.68  | 0.04 | 0.060161 | 0.0036194  | 20.42045 | 0.069689 | 40.56   |
| 2226   | 2017 | 0.092 | 0.04 | 0.060161 | 0.0036194  | 22.35781 | 0.029543 | 28.85   |
| 300475 | 2017 | -0.72 | 0.04 | 0.060161 | 0.0036194  | 21.14275 | 0.070393 | 27.47   |
| 2226   | 2017 | -0.26 | 0.04 | 0.060161 | 0.0036194  | 22.35781 | 0.029543 | 28.85   |
| 2226   | 2017 | -0.7  | 0.04 | 0.060161 | 0.0036194  | 22.35781 | 0.029543 | 28.85   |
| 2226   | 2017 | 0.291 | 0.04 | 0.060161 | 0.0036194  | 22.35781 | 0.029543 | 28.85   |
| 2760   | 2017 | 0.749 | 0.04 | 0.060161 | 0.0036194  | 20.63587 | -0.17641 | 22.06   |
| 887    | 2017 | -0.23 | 0.04 | 0.060161 | 0.0036194  | 23.45429 | 0.14854  | 45.62   |
| 2226   | 2017 | -0.18 | 0.04 | 0.060161 | 0.0036194  | 22.35781 | 0.029543 | 28.85   |
| 887    | 2017 | 0.667 | 0.04 | 0.060161 | 0.0036194  | 23.45429 | 0.14854  | 45.62   |
| 887    | 2017 | -0.56 | 0.04 | 0.060161 | 0.0036194  | 23.45429 | 0.14854  | 45.62   |
| 887    | 2017 | 0.667 | 0.04 | 0.060161 | 0.0036194  | 23.45429 | 0.14854  | 45.62   |
| 887    | 2017 | 0.144 | 0.04 | 0.060161 | 0.0036194  | 23.45429 | 0.14854  | 45.62   |
| 2817   | 2017 | 0.68  | 0.04 | 0.060161 | 0.0036194  | 20.42045 | 0.069689 | 40.56   |
| 603599 | 2017 | 0.385 | 0.04 | 0.060161 | 0.0036194  | 22.42661 | 0.081686 | 42.0634 |
| 2226   | 2017 | -0.7  | 0.04 | 0.060161 | 0.0036194  | 22.35781 | 0.029543 | 28.85   |
| 2760   | 2017 | 0.749 | 0.04 | 0.060161 | 0.0036194  | 20.64062 | -0.17641 | 22.06   |
| 603599 | 2017 | 0.385 | 0.04 | 0.060161 | 0.0036194  | 22.42661 | 0.081686 | 42.0634 |
| 2226   | 2017 | -0.21 | 0.04 | 0.060161 | 0.0036194  | 22.35781 | 0.029543 | 28.85   |
| 887    | 2017 | 0.135 | 0.04 | 0.060161 | 0.0036194  | 23.45429 | 0.14854  | 45.62   |
| 2226   | 2017 | -0.26 | 0.04 | 0.060161 | 0.0036194  | 22.35781 | 0.029543 | 28.85   |
| 2226   | 2017 | -0.7  | 0.04 | 0.060161 | 0.0036194  | 22.35781 | 0.029543 | 28.85   |
| 603599 | 2017 | 0.368 | 0.04 | 0.060161 | 0.0036194  | 22.24835 | 0.081686 | 42.0634 |
| 2226   | 2017 | 0.092 | 0.04 | 0.060161 | 0.0036194  | 22.35781 | 0.029543 | 28.85   |
| 2760   | 2017 | 0.749 | 0.04 | 0.060161 | 0.0036194  | 20.63587 | -0.17641 | 22.06   |
| 300475 | 2017 | -0.64 | 0.04 | 0.060161 | 0.0036194  | 21.14275 | 0.070393 | 27.47   |
| 887    | 2017 | 0.762 | 0.04 | 0.060161 | 0.0036194  | 22.73676 | 0.14854  | 45.62   |
| 2817   | 2017 | 0.68  | 0.04 | 0.060161 | 0.0036194  | 20.42045 | 0.069689 | 40.56   |
| 2304   | 2017 | -0.96 | 0.02 | 0.10936  | 0.01195963 | 24.49045 | 0.224405 | 34.16   |
| 300160 | 2017 | 0.083 | 0.02 | 0.10936  | 0.01195963 | 21.49565 | 0.087656 | 24.16   |
| 2304   | 2017 | -0.71 | 0.02 | 0.10936  | 0.01195963 | 24.49045 | 0.224405 | 34.16   |
| 2304   | 2017 | -0.78 | 0.02 | 0.10936  | 0.01195963 | 24.49045 | 0.224405 | 34.16   |
| 300160 | 2017 | 0.083 | 0.02 | 0.10936  | 0.01195963 | 21.43758 | 0.087656 | 24.16   |
| 2304   | 2017 | -0.96 | 0.02 | 0.10936  | 0.01195963 | 24.54782 | 0.224405 | 34.16   |
| 2585   | 2017 | -0.66 | 0.02 | 0.10936  | 0.01195963 | 22.92606 | 0.0101   | 27.32   |
| 2304   | 2017 | -0.71 | 0.02 | 0.10936  | 0.01195963 | 24.49045 | 0.224405 | 34.16   |
| 300160 | 2017 | 0.083 | 0.02 | 0.10936  | 0.01195963 | 21.49565 | 0.087656 | 24.16   |
| 2585   | 2017 | -0.66 | 0.02 | 0.10936  | 0.01195963 | 22.92606 | 0.0101   | 27.32   |
| 2304   | 2017 | -0.96 | 0.02 | 0.10936  | 0.01195963 | 24.49045 | 0.224405 | 34.16   |
| 2585   | 2017 | -0.66 | 0.02 | 0.10936  | 0.01195963 | 22.92161 | 0.0101   | 27.32   |
| 2585   | 2017 | -0.66 | 0.02 | 0.10936  | 0.01195963 | 22.92606 | 0.0101   | 27.32   |
| 2585   | 2017 | -0.66 | 0.02 | 0.10936  | 0.01195963 | 22.92606 | 0.0101   | 27.32   |
| 300035 | 2017 | 0.059 | 0.04 | 1.243675 | 1.5467266  | 21.12724 | 0.04221  | 15.56   |

|        |      |       |      |          |            |          |          |       |
|--------|------|-------|------|----------|------------|----------|----------|-------|
| 2549   | 2017 | 0.793 | 0.04 | 1.243675 | 1.5467266  | 20.78333 | 0.0603   | 64.51 |
| 300035 | 2017 | 0.231 | 0.04 | 1.243675 | 1.5467266  | 21.12724 | 0.04221  | 15.56 |
| 2549   | 2017 | 0.303 | 0.04 | 1.243675 | 1.5467266  | 20.90877 | 0.0603   | 64.51 |
| 702    | 2017 | 0.564 | 0.04 | 1.243675 | 1.5467266  | 20.42985 | 0.031286 | 25.13 |
| 702    | 2017 | 0.564 | 0.04 | 1.243675 | 1.5467266  | 20.37509 | 0.031286 | 25.13 |
| 908    | 2017 | 0.265 | 0.04 | 1.243675 | 1.5467266  | 22.30611 | 0.07124  | 19.8  |
| 300035 | 2017 | 0.188 | 0.04 | 1.243675 | 1.5467266  | 21.12724 | 0.04221  | 15.56 |
| 819    | 2017 | 0.349 | 0.04 | 1.243675 | 1.5467266  | 20.52477 | -0.01833 | 23.46 |
| 300035 | 2017 | 0.059 | 0.04 | 1.243675 | 1.5467266  | 21.12724 | 0.04221  | 15.56 |
| 603959 | 2017 | 0.367 | 0.04 | 1.243675 | 1.5467266  | 21.33943 | 0.113211 | 52.5  |
| 2549   | 2017 | 0.324 | 0.04 | 1.243675 | 1.5467266  | 20.90877 | 0.0603   | 64.51 |
| 702    | 2017 | 0.564 | 0.04 | 1.243675 | 1.5467266  | 20.37509 | 0.031286 | 25.13 |
| 600963 | 2017 | 0.577 | 0.04 | 1.243675 | 1.5467266  | 23.28984 | 0.044268 | 27.87 |
| 600963 | 2017 | 0.577 | 0.04 | 1.243675 | 1.5467266  | 23.46026 | 0.044268 | 27.87 |
| 819    | 2017 | 0.349 | 0.04 | 1.243675 | 1.5467266  | 20.52477 | -0.01833 | 23.46 |
| 2549   | 2017 | 0.352 | 0.04 | 1.243675 | 1.5467266  | 20.90877 | 0.0603   | 64.51 |
| 2549   | 2017 | 0.793 | 0.04 | 1.243675 | 1.5467266  | 20.90877 | 0.0603   | 64.51 |
| 819    | 2017 | 0.349 | 0.04 | 1.243675 | 1.5467266  | 20.52477 | -0.01833 | 23.46 |
| 908    | 2017 | 0.927 | 0.04 | 1.243675 | 1.5467266  | 22.30611 | 0.07124  | 19.8  |
| 908    | 2017 | 0.414 | 0.04 | 1.243675 | 1.5467266  | 22.30611 | 0.07124  | 19.8  |
| 908    | 2017 | 0.662 | 0.04 | 1.243675 | 1.5467266  | 22.30611 | 0.07124  | 19.8  |
| 908    | 2017 | 0.927 | 0.04 | 1.243675 | 1.5467266  | 22.49776 | 0.07124  | 19.8  |
| 819    | 2017 | 0.349 | 0.04 | 1.243675 | 1.5467266  | 20.51441 | -0.01833 | 23.46 |
| 908    | 2017 | 0.927 | 0.04 | 1.243675 | 1.5467266  | 22.30611 | 0.07124  | 19.8  |
| 908    | 2017 | 0.927 | 0.04 | 1.243675 | 1.5467266  | 22.30611 | 0.07124  | 19.8  |
| 300035 | 2017 | 0.188 | 0.04 | 1.243675 | 1.5467266  | 21.12724 | 0.04221  | 15.56 |
| 603959 | 2017 | 0.272 | 0.04 | 1.243675 | 1.5467266  | 21.52652 | 0.113211 | 52.5  |
| 603959 | 2017 | 0.234 | 0.04 | 1.243675 | 1.5467266  | 21.52652 | 0.113211 | 52.5  |
| 908    | 2017 | 0.379 | 0.04 | 1.243675 | 1.5467266  | 22.30611 | 0.07124  | 19.8  |
| 300035 | 2017 | 0.188 | 0.04 | 1.243675 | 1.5467266  | 21.12724 | 0.04221  | 15.56 |
| 600963 | 2017 | 0.577 | 0.04 | 1.243675 | 1.5467266  | 23.46026 | 0.044268 | 27.87 |
| 908    | 2017 | 0.927 | 0.04 | 1.243675 | 1.5467266  | 22.30611 | 0.07124  | 19.8  |
| 600963 | 2017 | 0.577 | 0.04 | 1.243675 | 1.5467266  | 23.46026 | 0.044268 | 27.87 |
| 908    | 2017 | 0.927 | 0.04 | 1.243675 | 1.5467266  | 22.30611 | 0.07124  | 19.8  |
| 600963 | 2017 | 0.577 | 0.04 | 1.243675 | 1.5467266  | 23.46026 | 0.044268 | 27.87 |
| 908    | 2017 | 0.927 | 0.04 | 1.243675 | 1.5467266  | 22.30611 | 0.07124  | 19.8  |
| 600963 | 2017 | 0.577 | 0.04 | 1.243675 | 1.5467266  | 23.46026 | 0.044268 | 27.87 |
| 2549   | 2017 | 0.382 | 0.04 | 1.243675 | 1.5467266  | 20.90877 | 0.0603   | 64.51 |
| 908    | 2017 | -0.16 | 0.04 | 1.243675 | 1.5467266  | 22.30611 | 0.07124  | 19.8  |
| 603959 | 2017 | 0.234 | 0.04 | 1.243675 | 1.5467266  | 21.52652 | 0.113211 | 52.5  |
| 819    | 2017 | 0.349 | 0.04 | 1.243675 | 1.5467266  | 20.52477 | -0.01833 | 23.46 |
| 2549   | 2017 | 0.352 | 0.04 | 1.243675 | 1.5467266  | 20.90877 | 0.0603   | 64.51 |
| 603959 | 2017 | 0.367 | 0.04 | 1.243675 | 1.5467266  | 21.52652 | 0.113211 | 52.5  |
| 600963 | 2017 | 0.577 | 0.04 | 1.243675 | 1.5467266  | 23.46026 | 0.044268 | 27.87 |
| 908    | 2017 | 0.927 | 0.04 | 1.243675 | 1.5467266  | 22.30611 | 0.07124  | 19.8  |
| 300035 | 2017 | 0.231 | 0.04 | 1.243675 | 1.5467266  | 20.9125  | 0.04221  | 15.56 |
| 908    | 2017 | 0.927 | 0.04 | 1.243675 | 1.5467266  | 22.30611 | 0.07124  | 19.8  |
| 603158 | 2017 | -0.23 | 0.02 | 0.875365 | 0.76626458 | 21.14412 | 0.131707 | 49.72 |
| 603203 | 2017 | -0.4  | 0.02 | 0.875365 | 0.76626458 | 20.60925 | 0.182263 | 30.41 |
| 600710 | 2017 | -0.48 | 0.02 | 0.875365 | 0.76626458 | 24.44455 | 0.155464 | 23.23 |
| 600710 | 2017 | -0.48 | 0.02 | 0.875365 | 0.76626458 | 24.44455 | 0.155464 | 23.23 |
| 2553   | 2017 | 0.037 | 0.02 | 0.875365 | 0.76626458 | 20.47763 | 0.111913 | 39.6  |
| 601799 | 2017 | -0.47 | 0.02 | 0.875365 | 0.76626458 | 22.58862 | 0.116517 | 37.3  |
| 601100 | 2017 | -0.27 | 0.02 | 0.875365 | 0.76626458 | 22.42697 | 0.098369 | 37.96 |
| 2708   | 2017 | 0.021 | 0.02 | 0.875365 | 0.76626458 | 21.57623 | 0.007991 | 29.57 |
| 2550   | 2017 | 0.403 | 0.02 | 0.875365 | 0.76626458 | 21.83399 | 0.071307 | 19.95 |

|        |      |       |      |          |            |          |          |       |
|--------|------|-------|------|----------|------------|----------|----------|-------|
| 2516   | 2017 | -0.81 | 0.02 | 0.875365 | 0.76626458 | 22.31738 | 0.091812 | 45.65 |
| 2550   | 2017 | 0.804 | 0.02 | 0.875365 | 0.76626458 | 21.83654 | 0.071307 | 19.95 |
| 600510 | 2017 | -0.88 | 0.02 | 0.875365 | 0.76626458 | 23.81804 | 0.056244 | 49.92 |
| 2413   | 2017 | 1.014 | 0.02 | 0.875365 | 0.76626458 | 22.13337 | 0.035917 | 17.3  |
| 300196 | 2017 | -0.08 | 0.02 | 0.875365 | 0.76626458 | 21.66425 | 0.082158 | 40.16 |
| 300169 | 2017 | -0.67 | 0.02 | 0.875365 | 0.76626458 | 21.29488 | -0.03188 | 9.87  |
| 603158 | 2017 | 0.787 | 0.02 | 0.875365 | 0.76626458 | 21.14412 | 0.131707 | 49.72 |
| 600510 | 2017 | -0.88 | 0.02 | 0.875365 | 0.76626458 | 23.81804 | 0.056244 | 49.92 |
| 600710 | 2017 | -0.48 | 0.02 | 0.875365 | 0.76626458 | 24.44455 | 0.155464 | 23.23 |
| 600710 | 2017 | -0.26 | 0.02 | 0.875365 | 0.76626458 | 24.44455 | 0.155464 | 23.23 |
| 2413   | 2017 | 1.014 | 0.02 | 0.875365 | 0.76626458 | 22.13337 | 0.035917 | 17.3  |
| 603158 | 2017 | -0.01 | 0.02 | 0.875365 | 0.76626458 | 21.14412 | 0.131707 | 49.72 |
| 300196 | 2017 | -0.43 | 0.02 | 0.875365 | 0.76626458 | 21.85595 | 0.082158 | 40.16 |
| 2708   | 2017 | -0.36 | 0.02 | 0.875365 | 0.76626458 | 21.57623 | 0.007991 | 29.57 |
| 681    | 2017 | 0.163 | 0.02 | 0.875365 | 0.76626458 | 22.13412 | 0.120058 | 13.98 |
| 600710 | 2017 | -0.77 | 0.02 | 0.875365 | 0.76626458 | 24.44455 | 0.155464 | 23.23 |
| 2413   | 2017 | 1.295 | 0.02 | 0.875365 | 0.76626458 | 22.13337 | 0.035917 | 17.3  |
| 601100 | 2017 | -0.03 | 0.02 | 0.875365 | 0.76626458 | 22.54071 | 0.098369 | 37.96 |
| 600510 | 2017 | -0.88 | 0.02 | 0.875365 | 0.76626458 | 23.81804 | 0.056244 | 49.92 |
| 600510 | 2017 | -0.88 | 0.02 | 0.875365 | 0.76626458 | 23.81804 | 0.056244 | 49.92 |
| 300429 | 2017 | 0.945 | 0.02 | 0.875365 | 0.76626458 | 20.97228 | 0.112194 | 29.8  |
| 600510 | 2017 | -0.88 | 0.02 | 0.875365 | 0.76626458 | 23.81804 | 0.056244 | 49.92 |
| 300196 | 2017 | -0.08 | 0.02 | 0.875365 | 0.76626458 | 21.85595 | 0.082158 | 40.16 |
| 300196 | 2017 | -0.08 | 0.02 | 0.875365 | 0.76626458 | 21.85595 | 0.082158 | 40.16 |
| 2413   | 2017 | 1.736 | 0.02 | 0.875365 | 0.76626458 | 22.13337 | 0.035917 | 17.3  |
| 300169 | 2017 | 0.214 | 0.02 | 0.875365 | 0.76626458 | 21.44814 | -0.03188 | 9.87  |
| 603158 | 2017 | 0.787 | 0.02 | 0.875365 | 0.76626458 | 21.14412 | 0.131707 | 49.72 |
| 600710 | 2017 | -0.35 | 0.02 | 0.875365 | 0.76626458 | 24.44455 | 0.155464 | 23.23 |
| 600710 | 2017 | -0.48 | 0.02 | 0.875365 | 0.76626458 | 22.18804 | 0.155464 | 23.23 |
| 603188 | 2017 | 0.721 | 0.02 | 0.875365 | 0.76626458 | 22.22636 | 0.133332 | 28.84 |
| 603158 | 2017 | -0.28 | 0.02 | 0.875365 | 0.76626458 | 20.85492 | 0.131707 | 49.72 |
| 2553   | 2017 | 0.037 | 0.02 | 0.875365 | 0.76626458 | 20.47763 | 0.111913 | 39.6  |
| 570    | 2017 | -0.66 | 0.02 | 0.875365 | 0.76626458 | 22.03777 | 0.020799 | 30.43 |
| 603188 | 2017 | 0.721 | 0.02 | 0.875365 | 0.76626458 | 22.22636 | 0.133332 | 28.84 |
| 2478   | 2017 | -0.31 | 0.02 | 0.875365 | 0.76626458 | 22.4601  | 0.040493 | 22.35 |
| 300305 | 2017 | -0.06 | 0.02 | 0.875365 | 0.76626458 | 21.17915 | 0.047871 | 23.54 |
| 603203 | 2017 | 0.128 | 0.02 | 0.875365 | 0.76626458 | 20.607   | 0.182263 | 30.41 |
| 2550   | 2017 | 0.844 | 0.02 | 0.875365 | 0.76626458 | 21.83654 | 0.071307 | 19.95 |
| 300305 | 2017 | -0.06 | 0.02 | 0.875365 | 0.76626458 | 21.17813 | 0.047871 | 23.54 |
| 300305 | 2017 | -0.06 | 0.02 | 0.875365 | 0.76626458 | 21.17915 | 0.047871 | 23.54 |
| 603158 | 2017 | -0.3  | 0.02 | 0.875365 | 0.76626458 | 21.14412 | 0.131707 | 49.72 |
| 600710 | 2017 | -0.48 | 0.02 | 0.875365 | 0.76626458 | 24.44455 | 0.155464 | 23.23 |
| 600710 | 2017 | -0.92 | 0.02 | 0.875365 | 0.76626458 | 24.44455 | 0.155464 | 23.23 |
| 603188 | 2017 | 0.721 | 0.02 | 0.875365 | 0.76626458 | 22.22636 | 0.133332 | 28.84 |
| 603158 | 2017 | -0.32 | 0.02 | 0.875365 | 0.76626458 | 21.14412 | 0.131707 | 49.72 |
| 601100 | 2017 | -0.27 | 0.02 | 0.875365 | 0.76626458 | 22.54071 | 0.098369 | 37.96 |
| 300429 | 2017 | 0.945 | 0.02 | 0.875365 | 0.76626458 | 20.97228 | 0.112194 | 29.8  |
| 603819 | 2017 | -0.17 | 0.02 | 0.875365 | 0.76626458 | 20.61954 | 0.041368 | 42.17 |
| 570    | 2017 | -0.66 | 0.02 | 0.875365 | 0.76626458 | 22.03777 | 0.020799 | 30.43 |
| 2623   | 2017 | -0.66 | 0.02 | 0.875365 | 0.76626458 | 22.2789  | -0.00893 | 45    |
| 300190 | 2017 | -0.6  | 0.02 | 0.875365 | 0.76626458 | 22.53803 | 0.038518 | 39.98 |
| 600710 | 2017 | -0.92 | 0.02 | 0.875365 | 0.76626458 | 24.44455 | 0.155464 | 23.23 |
| 300196 | 2017 | -0.08 | 0.02 | 0.875365 | 0.76626458 | 21.85595 | 0.082158 | 40.16 |
| 2478   | 2017 | -0.37 | 0.02 | 0.875365 | 0.76626458 | 22.05042 | 0.040493 | 22.35 |

|        |      |       |      |          |            |          |          |       |
|--------|------|-------|------|----------|------------|----------|----------|-------|
| 600710 | 2017 | -0.12 | 0.02 | 0.875365 | 0.76626458 | 24.44455 | 0.155464 | 23.23 |
| 600710 | 2017 | -0.46 | 0.02 | 0.875365 | 0.76626458 | 24.44455 | 0.155464 | 23.23 |
| 601100 | 2017 | -0.6  | 0.02 | 0.875365 | 0.76626458 | 22.54071 | 0.098369 | 37.96 |
| 600710 | 2017 | -0.48 | 0.02 | 0.875365 | 0.76626458 | 24.44455 | 0.155464 | 23.23 |
| 2550   | 2017 | 0.403 | 0.02 | 0.875365 | 0.76626458 | 21.83654 | 0.071307 | 19.95 |
| 2413   | 2017 | 1.014 | 0.02 | 0.875365 | 0.76626458 | 22.13337 | 0.035917 | 17.3  |
| 2516   | 2017 | -0.44 | 0.02 | 0.875365 | 0.76626458 | 22.31738 | 0.091812 | 45.65 |
| 300190 | 2017 | -0.6  | 0.02 | 0.875365 | 0.76626458 | 22.53803 | 0.038518 | 39.98 |
| 2516   | 2017 | -0.55 | 0.02 | 0.875365 | 0.76626458 | 22.31738 | 0.091812 | 45.65 |
| 603878 | 2017 | 0.175 | 0.02 | 0.875365 | 0.76626458 | 21.66469 | 0.063095 | 16.33 |
| 2623   | 2017 | -0.66 | 0.02 | 0.875365 | 0.76626458 | 22.2789  | -0.00893 | 45    |
| 600710 | 2017 | 0.142 | 0.02 | 0.875365 | 0.76626458 | 24.44455 | 0.155464 | 23.23 |
| 300169 | 2017 | -0.67 | 0.02 | 0.875365 | 0.76626458 | 21.44814 | -0.03188 | 9.87  |
| 300190 | 2017 | -0.43 | 0.02 | 0.875365 | 0.76626458 | 22.53803 | 0.038518 | 39.98 |
| 570    | 2017 | -0.66 | 0.02 | 0.875365 | 0.76626458 | 21.97924 | 0.020799 | 30.43 |
| 603819 | 2017 | -0.17 | 0.02 | 0.875365 | 0.76626458 | 20.6127  | 0.041368 | 42.17 |
| 300190 | 2017 | 0.508 | 0.02 | 0.875365 | 0.76626458 | 22.53803 | 0.038518 | 39.98 |
| 600710 | 2017 | -0.26 | 0.02 | 0.875365 | 0.76626458 | 24.44455 | 0.155464 | 23.23 |
| 300190 | 2017 | -0.27 | 0.02 | 0.875365 | 0.76626458 | 22.53803 | 0.038518 | 39.98 |
| 600710 | 2017 | -0.26 | 0.02 | 0.875365 | 0.76626458 | 24.44455 | 0.155464 | 23.23 |
| 603819 | 2017 | -0.17 | 0.02 | 0.875365 | 0.76626458 | 20.61954 | 0.041368 | 42.17 |
| 681    | 2017 | 0.163 | 0.02 | 0.875365 | 0.76626458 | 22.02918 | 0.120058 | 13.98 |
| 603188 | 2017 | 0.721 | 0.02 | 0.875365 | 0.76626458 | 22.22636 | 0.133332 | 28.84 |
| 300429 | 2017 | 0.945 | 0.02 | 0.875365 | 0.76626458 | 20.97228 | 0.112194 | 29.8  |
| 603203 | 2017 | -0.22 | 0.02 | 0.875365 | 0.76626458 | 20.60925 | 0.182263 | 30.41 |
| 600710 | 2017 | -0.48 | 0.02 | 0.875365 | 0.76626458 | 24.44455 | 0.155464 | 23.23 |
| 600710 | 2017 | -0.48 | 0.02 | 0.875365 | 0.76626458 | 24.44455 | 0.155464 | 23.23 |
| 603188 | 2017 | 0.721 | 0.02 | 0.875365 | 0.76626458 | 21.88711 | 0.133332 | 28.84 |
| 2413   | 2017 | 1.263 | 0.02 | 0.875365 | 0.76626458 | 22.13337 | 0.035917 | 17.3  |
| 300169 | 2017 | 0.214 | 0.02 | 0.875365 | 0.76626458 | 21.44814 | -0.03188 | 9.87  |
| 2478   | 2017 | 0.092 | 0.02 | 0.875365 | 0.76626458 | 22.4601  | 0.040493 | 22.35 |
| 2708   | 2017 | -0.36 | 0.02 | 0.875365 | 0.76626458 | 21.57623 | 0.007991 | 29.57 |
| 2550   | 2017 | 0.805 | 0.02 | 0.875365 | 0.76626458 | 21.83654 | 0.071307 | 19.95 |
| 2550   | 2017 | 0.844 | 0.02 | 0.875365 | 0.76626458 | 21.83654 | 0.071307 | 19.95 |
| 2516   | 2017 | 0.136 | 0.02 | 0.875365 | 0.76626458 | 22.31738 | 0.091812 | 45.65 |
| 300169 | 2017 | 0.214 | 0.02 | 0.875365 | 0.76626458 | 21.44814 | -0.03188 | 9.87  |
| 601100 | 2017 | -0.1  | 0.02 | 0.875365 | 0.76626458 | 22.54071 | 0.098369 | 37.96 |
| 2413   | 2017 | 1.472 | 0.02 | 0.875365 | 0.76626458 | 21.91665 | 0.035917 | 17.3  |
| 2516   | 2017 | -0.44 | 0.02 | 0.875365 | 0.76626458 | 22.31738 | 0.091812 | 45.65 |
| 603158 | 2017 | -0.1  | 0.02 | 0.875365 | 0.76626458 | 21.14412 | 0.131707 | 49.72 |
| 603158 | 2017 | -0.54 | 0.02 | 0.875365 | 0.76626458 | 21.14412 | 0.131707 | 49.72 |
| 2516   | 2017 | -0.5  | 0.02 | 0.875365 | 0.76626458 | 21.9296  | 0.091812 | 45.65 |
| 600710 | 2017 | -0.48 | 0.02 | 0.875365 | 0.76626458 | 24.44455 | 0.155464 | 23.23 |
| 300429 | 2017 | 0.945 | 0.02 | 0.875365 | 0.76626458 | 20.97228 | 0.112194 | 29.8  |
| 300190 | 2017 | 0.066 | 0.02 | 0.875365 | 0.76626458 | 22.35911 | 0.038518 | 39.98 |
| 300169 | 2017 | 0.088 | 0.02 | 0.875365 | 0.76626458 | 21.44814 | -0.03188 | 9.87  |
| 300196 | 2017 | -0.21 | 0.02 | 0.875365 | 0.76626458 | 21.85595 | 0.082158 | 40.16 |
| 600710 | 2017 | -0.18 | 0.02 | 0.875365 | 0.76626458 | 24.44455 | 0.155464 | 23.23 |
| 300196 | 2017 | -0.43 | 0.02 | 0.875365 | 0.76626458 | 21.85595 | 0.082158 | 40.16 |
| 2550   | 2017 | 0.844 | 0.02 | 0.875365 | 0.76626458 | 21.83654 | 0.071307 | 19.95 |
| 300305 | 2017 | -0.06 | 0.02 | 0.875365 | 0.76626458 | 21.17915 | 0.047871 | 23.54 |
| 2553   | 2017 | 0.037 | 0.02 | 0.875365 | 0.76626458 | 20.47763 | 0.111913 | 39.6  |
| 570    | 2017 | -0.66 | 0.02 | 0.875365 | 0.76626458 | 22.03777 | 0.020799 | 30.43 |
| 681    | 2017 | 0.163 | 0.02 | 0.875365 | 0.76626458 | 22.13412 | 0.120058 | 13.98 |

|        |      |       |      |          |            |          |          |       |
|--------|------|-------|------|----------|------------|----------|----------|-------|
| 300190 | 2017 | -0.24 | 0.02 | 0.875365 | 0.76626458 | 22.53803 | 0.038518 | 39.98 |
| 601100 | 2017 | -0.03 | 0.02 | 0.875365 | 0.76626458 | 22.54071 | 0.098369 | 37.96 |
| 2708   | 2017 | 0.226 | 0.02 | 0.875365 | 0.76626458 | 21.57623 | 0.007991 | 29.57 |
| 600710 | 2017 | -0.48 | 0.02 | 0.875365 | 0.76626458 | 24.44455 | 0.155464 | 23.23 |
| 300190 | 2017 | 0.066 | 0.02 | 0.875365 | 0.76626458 | 22.53803 | 0.038518 | 39.98 |
| 603878 | 2017 | 0.175 | 0.02 | 0.875365 | 0.76626458 | 21.66469 | 0.063095 | 16.33 |
| 2516   | 2017 | -0.81 | 0.02 | 0.875365 | 0.76626458 | 22.31738 | 0.091812 | 45.65 |
| 601799 | 2017 | -0.47 | 0.02 | 0.875365 | 0.76626458 | 22.58862 | 0.116517 | 37.3  |
| 2553   | 2017 | 0.037 | 0.02 | 0.875365 | 0.76626458 | 20.48039 | 0.111913 | 39.6  |
| 2623   | 2017 | -0.66 | 0.02 | 0.875365 | 0.76626458 | 22.05291 | -0.00893 | 45    |
| 2623   | 2017 | -0.66 | 0.02 | 0.875365 | 0.76626458 | 22.2789  | -0.00893 | 45    |
| 600710 | 2017 | -0.43 | 0.02 | 0.875365 | 0.76626458 | 24.44455 | 0.155464 | 23.23 |
| 603158 | 2017 | 0.787 | 0.02 | 0.875365 | 0.76626458 | 21.14412 | 0.131707 | 49.72 |
| 300169 | 2017 | 0.214 | 0.02 | 0.875365 | 0.76626458 | 21.44814 | -0.03188 | 9.87  |
| 600710 | 2017 | -0.59 | 0.02 | 0.875365 | 0.76626458 | 24.44455 | 0.155464 | 23.23 |
| 300305 | 2017 | -0.06 | 0.02 | 0.875365 | 0.76626458 | 21.17915 | 0.047871 | 23.54 |
| 2516   | 2017 | -0.5  | 0.02 | 0.875365 | 0.76626458 | 22.31738 | 0.091812 | 45.65 |
| 601100 | 2017 | -0.02 | 0.02 | 0.875365 | 0.76626458 | 22.54071 | 0.098369 | 37.96 |
| 681    | 2017 | 0.163 | 0.02 | 0.875365 | 0.76626458 | 22.13412 | 0.120058 | 13.98 |
| 600510 | 2017 | -0.88 | 0.02 | 0.875365 | 0.76626458 | 23.81804 | 0.056244 | 49.92 |
| 2478   | 2017 | -0.37 | 0.02 | 0.875365 | 0.76626458 | 22.4601  | 0.040493 | 22.35 |
| 300190 | 2017 | 0.508 | 0.02 | 0.875365 | 0.76626458 | 22.53803 | 0.038518 | 39.98 |
| 601799 | 2017 | -0.47 | 0.02 | 0.875365 | 0.76626458 | 22.58804 | 0.116517 | 37.3  |
| 681    | 2017 | 0.163 | 0.02 | 0.875365 | 0.76626458 | 22.13412 | 0.120058 | 13.98 |
| 600710 | 2017 | -0.92 | 0.02 | 0.875365 | 0.76626458 | 24.44455 | 0.155464 | 23.23 |
| 603188 | 2017 | 0.721 | 0.02 | 0.875365 | 0.76626458 | 22.22636 | 0.133332 | 28.84 |
| 2708   | 2017 | 0.226 | 0.02 | 0.875365 | 0.76626458 | 21.3414  | 0.007991 | 29.57 |
| 2478   | 2017 | -0.17 | 0.02 | 0.875365 | 0.76626458 | 22.4601  | 0.040493 | 22.35 |
| 300429 | 2017 | 0.945 | 0.02 | 0.875365 | 0.76626458 | 20.5767  | 0.112194 | 29.8  |
| 2478   | 2017 | -0.21 | 0.02 | 0.875365 | 0.76626458 | 22.4601  | 0.040493 | 22.35 |
| 600710 | 2017 | -0.92 | 0.02 | 0.875365 | 0.76626458 | 24.44455 | 0.155464 | 23.23 |
| 2413   | 2017 | 1.263 | 0.02 | 0.875365 | 0.76626458 | 22.13337 | 0.035917 | 17.3  |
| 600510 | 2017 | -0.88 | 0.02 | 0.875365 | 0.76626458 | 23.81804 | 0.056244 | 49.92 |
| 300190 | 2017 | -0.27 | 0.02 | 0.875365 | 0.76626458 | 22.53803 | 0.038518 | 39.98 |
| 2553   | 2017 | 0.037 | 0.02 | 0.875365 | 0.76626458 | 20.47763 | 0.111913 | 39.6  |
| 601100 | 2017 | -0.27 | 0.02 | 0.875365 | 0.76626458 | 22.54071 | 0.098369 | 37.96 |
| 2516   | 2017 | -0.5  | 0.02 | 0.875365 | 0.76626458 | 22.31738 | 0.091812 | 45.65 |
| 603158 | 2017 | 0.787 | 0.02 | 0.875365 | 0.76626458 | 21.14412 | 0.131707 | 49.72 |
| 2550   | 2017 | 0.844 | 0.02 | 0.875365 | 0.76626458 | 21.83654 | 0.071307 | 19.95 |
| 570    | 2017 | -0.66 | 0.02 | 0.875365 | 0.76626458 | 22.03777 | 0.020799 | 30.43 |
| 603203 | 2017 | -0.22 | 0.02 | 0.875365 | 0.76626458 | 20.607   | 0.182263 | 30.41 |
| 603188 | 2017 | 0.721 | 0.02 | 0.875365 | 0.76626458 | 22.22636 | 0.133332 | 28.84 |
| 603158 | 2017 | 0.787 | 0.02 | 0.875365 | 0.76626458 | 21.14412 | 0.131707 | 49.72 |
| 300429 | 2017 | 0.945 | 0.02 | 0.875365 | 0.76626458 | 20.97228 | 0.112194 | 29.8  |
| 600510 | 2017 | -0.88 | 0.02 | 0.875365 | 0.76626458 | 23.17198 | 0.056244 | 49.92 |
| 300429 | 2017 | 0.945 | 0.02 | 0.875365 | 0.76626458 | 20.97228 | 0.112194 | 29.8  |
| 603188 | 2017 | 0.721 | 0.02 | 0.875365 | 0.76626458 | 22.22636 | 0.133332 | 28.84 |
| 600710 | 2017 | -0.48 | 0.02 | 0.875365 | 0.76626458 | 24.44455 | 0.155464 | 23.23 |
| 603878 | 2017 | 0.175 | 0.02 | 0.875365 | 0.76626458 | 21.66473 | 0.063095 | 16.33 |
| 2623   | 2017 | -0.66 | 0.02 | 0.875365 | 0.76626458 | 22.2789  | -0.00893 | 45    |
| 600127 | 2017 | -0.91 | 0.04 | 0.080387 | 0.00646201 | 21.43584 | 0.013027 | 22.34 |
| 600127 | 2017 | 0.412 | 0.04 | 0.080387 | 0.00646201 | 21.112   | 0.013027 | 22.34 |
| 600127 | 2017 | -0.03 | 0.04 | 0.080387 | 0.00646201 | 21.43584 | 0.013027 | 22.34 |
| 600127 | 2017 | 0.412 | 0.04 | 0.080387 | 0.00646201 | 21.43584 | 0.013027 | 22.34 |



|        |      |       |      |          |            |          |          |       |
|--------|------|-------|------|----------|------------|----------|----------|-------|
| 600127 | 2017 | 0.412 | 0.04 | 0.080387 | 0.00646201 | 21.112   | 0.013027 | 22.34 |
| 600127 | 2017 | 0.412 | 0.04 | 0.080387 | 0.00646201 | 21.43584 | 0.013027 | 22.34 |
| 600127 | 2017 | 0.412 | 0.04 | 0.080387 | 0.00646201 | 21.43584 | 0.013027 | 22.34 |
| 600127 | 2017 | -0.25 | 0.04 | 0.080387 | 0.00646201 | 21.43584 | 0.013027 | 22.34 |
| 600127 | 2017 | 0.059 | 0.04 | 0.080387 | 0.00646201 | 21.43584 | 0.013027 | 22.34 |
| 600810 | 2017 | -0.92 | 0.02 | 1.400483 | 1.9613519  | 23.01901 | 0.043802 | 49.28 |
| 600810 | 2017 | -0.44 | 0.02 | 1.400483 | 1.9613519  | 22.7997  | 0.043802 | 49.28 |
| 600312 | 2017 | 0.602 | 0.02 | 1.400483 | 1.9613519  | 23.67984 | 0.070446 | 40.5  |
| 600312 | 2017 | 0.328 | 0.02 | 1.400483 | 1.9613519  | 23.67984 | 0.070446 | 40.5  |
| 600312 | 2017 | 0.081 | 0.02 | 1.400483 | 1.9613519  | 23.67984 | 0.070446 | 40.5  |
| 600312 | 2017 | 0.434 | 0.02 | 1.400483 | 1.9613519  | 23.67984 | 0.070446 | 40.5  |
| 600810 | 2017 | -0.26 | 0.02 | 1.400483 | 1.9613519  | 23.01901 | 0.043802 | 49.28 |
| 600810 | 2017 | -0.56 | 0.02 | 1.400483 | 1.9613519  | 23.01901 | 0.043802 | 49.28 |
| 600312 | 2017 | -0.26 | 0.02 | 1.400483 | 1.9613519  | 23.67984 | 0.070446 | 40.5  |
| 600810 | 2017 | -0.79 | 0.02 | 1.400483 | 1.9613519  | 23.01901 | 0.043802 | 49.28 |
| 600312 | 2017 | 0.704 | 0.02 | 1.400483 | 1.9613519  | 23.67984 | 0.070446 | 40.5  |
| 600312 | 2017 | 0.434 | 0.02 | 1.400483 | 1.9613519  | 23.67984 | 0.070446 | 40.5  |
| 600312 | 2017 | 0.602 | 0.02 | 1.400483 | 1.9613519  | 23.67984 | 0.070446 | 40.5  |
| 600312 | 2017 | 0.704 | 0.02 | 1.400483 | 1.9613519  | 23.36668 | 0.070446 | 40.5  |
| 600810 | 2017 | -0.82 | 0.02 | 1.400483 | 1.9613519  | 23.01901 | 0.043802 | 49.28 |
| 600312 | 2017 | 0.307 | 0.02 | 1.400483 | 1.9613519  | 23.67984 | 0.070446 | 40.5  |
| 600810 | 2017 | -0.44 | 0.02 | 1.400483 | 1.9613519  | 23.01901 | 0.043802 | 49.28 |
| 600810 | 2017 | -0.39 | 0.02 | 1.400483 | 1.9613519  | 23.01901 | 0.043802 | 49.28 |
| 600312 | 2017 | 0.203 | 0.02 | 1.400483 | 1.9613519  | 23.67984 | 0.070446 | 40.5  |
| 600810 | 2017 | -0.39 | 0.02 | 1.400483 | 1.9613519  | 23.01901 | 0.043802 | 49.28 |
| 600810 | 2017 | -0.48 | 0.02 | 1.400483 | 1.9613519  | 23.01901 | 0.043802 | 49.28 |
| 2544   | 2017 | 0.432 | 0.02 | 0.816761 | 0.66709883 | 22.56838 | 0.096991 | 31.13 |
| 601238 | 2017 | 0.115 | 0.02 | 0.816761 | 0.66709883 | 25.50744 | 0.153694 | 53.65 |
| 2177   | 2017 | 1.563 | 0.02 | 0.816761 | 0.66709883 | 21.44712 | 0.008144 | 20.44 |
| 300155 | 2017 | 0.276 | 0.02 | 0.816761 | 0.66709883 | 21.13708 | 0.011853 | 37.38 |
| 300219 | 2017 | -0.32 | 0.02 | 0.816761 | 0.66709883 | 22.32708 | 0.126216 | 23.99 |
| 2308   | 2017 | 0.974 | 0.02 | 0.816761 | 0.66709883 | 22.18317 | 0.055102 | 33.09 |
| 2683   | 2017 | -0.01 | 0.02 | 0.816761 | 0.66709883 | 22.1401  | 0.055065 | 21.13 |
| 300238 | 2017 | 0.723 | 0.02 | 0.816761 | 0.66709883 | 21.29897 | 0.028605 | 20.76 |
| 2308   | 2017 | 0.936 | 0.02 | 0.816761 | 0.66709883 | 22.18317 | 0.055102 | 33.09 |
| 600029 | 2017 | 0.195 | 0.02 | 0.816761 | 0.66709883 | 25.74206 | 0.109917 | 40.04 |
| 300147 | 2017 | 0.201 | 0.02 | 0.816761 | 0.66709883 | 22.94688 | 0.02887  | 34.11 |
| 300404 | 2017 | 1.062 | 0.02 | 0.816761 | 0.66709883 | 20.1694  | -0.0646  | 38.51 |
| 603608 | 2017 | -0.22 | 0.02 | 0.816761 | 0.66709883 | 21.76454 | 0.091753 | 21.96 |
| 300424 | 2017 | 0.769 | 0.02 | 0.816761 | 0.66709883 | 20.75212 | 0.073378 | 21.99 |
| 601238 | 2017 | -0.55 | 0.02 | 0.816761 | 0.66709883 | 25.50744 | 0.153694 | 53.65 |
| 2311   | 2017 | 0.481 | 0.02 | 0.816761 | 0.66709883 | 23.30048 | 0.179388 | 57.81 |
| 2311   | 2017 | 0.067 | 0.02 | 0.816761 | 0.66709883 | 23.30048 | 0.179388 | 57.81 |
| 300238 | 2017 | 0.551 | 0.02 | 0.816761 | 0.66709883 | 21.29897 | 0.028605 | 20.76 |
| 600029 | 2017 | 0.14  | 0.02 | 0.816761 | 0.66709883 | 25.74206 | 0.109917 | 40.04 |
| 601238 | 2017 | -0.35 | 0.02 | 0.816761 | 0.66709883 | 25.50744 | 0.153694 | 53.65 |
| 600332 | 2017 | 0.024 | 0.02 | 0.816761 | 0.66709883 | 23.63476 | 0.10999  | 45.04 |
| 2045   | 2017 | 0.091 | 0.02 | 0.816761 | 0.66709883 | 22.14994 | 0.085454 | 21.88 |
| 2420   | 2017 | -0.73 | 0.02 | 0.816761 | 0.66709883 | 22.14053 | -0.40236 | 25.98 |
| 300238 | 2017 | 0.462 | 0.02 | 0.816761 | 0.66709883 | 21.29897 | 0.028605 | 20.76 |
| 2030   | 2017 | 1.335 | 0.02 | 0.816761 | 0.66709883 | 22.25837 | 0.036386 | 16.63 |
| 2060   | 2017 | -0.02 | 0.02 | 0.816761 | 0.66709883 | 23.58634 | 0.054652 | 34.53 |
| 300177 | 2017 | 0.875 | 0.02 | 0.816761 | 0.66709883 | 21.63728 | 0.045559 | 26.16 |
| 300335 | 2017 | -0.03 | 0.02 | 0.816761 | 0.66709883 | 21.9381  | 0.169287 | 14.04 |

|        |      |       |      |          |            |          |          |       |
|--------|------|-------|------|----------|------------|----------|----------|-------|
| 2045   | 2017 | 0.143 | 0.02 | 0.816761 | 0.66709883 | 22.14994 | 0.085454 | 21.88 |
| 2045   | 2017 | -0.39 | 0.02 | 0.816761 | 0.66709883 | 22.14994 | 0.085454 | 21.88 |
| 300335 | 2017 | 0.106 | 0.02 | 0.816761 | 0.66709883 | 21.9381  | 0.169287 | 14.04 |
| 600098 | 2017 | -0.58 | 0.02 | 0.816761 | 0.66709883 | 24.37521 | 0.046447 | 62.69 |
| 600685 | 2017 | 0.228 | 0.02 | 0.816761 | 0.66709883 | 24.51103 | 0.008424 | 41.68 |
| 2461   | 2017 | -0.31 | 0.02 | 0.816761 | 0.66709883 | 23.14847 | 0.024779 | 31.98 |
| 300177 | 2017 | 0.286 | 0.02 | 0.816761 | 0.66709883 | 21.63728 | 0.045559 | 26.16 |
| 300424 | 2017 | 0.106 | 0.02 | 0.816761 | 0.66709883 | 20.92906 | 0.073378 | 21.99 |
| 300219 | 2017 | -0.24 | 0.02 | 0.816761 | 0.66709883 | 22.32708 | 0.126216 | 23.99 |
| 300404 | 2017 | 1.062 | 0.02 | 0.816761 | 0.66709883 | 20.12432 | -0.0646  | 38.51 |
| 429    | 2017 | -0.97 | 0.02 | 0.816761 | 0.66709883 | 23.52804 | 0.180897 | 24.55 |
| 2311   | 2017 | 0.481 | 0.02 | 0.816761 | 0.66709883 | 23.30048 | 0.179388 | 57.81 |
| 601238 | 2017 | -0.55 | 0.02 | 0.816761 | 0.66709883 | 25.50744 | 0.153694 | 53.65 |
| 600098 | 2017 | -0.31 | 0.02 | 0.816761 | 0.66709883 | 24.37521 | 0.046447 | 62.69 |
| 2169   | 2017 | 0.407 | 0.02 | 0.816761 | 0.66709883 | 22.16021 | 0.051356 | 19.32 |
| 2311   | 2017 | -0.84 | 0.02 | 0.816761 | 0.66709883 | 23.30048 | 0.179388 | 57.81 |
| 524    | 2017 | -0.99 | 0.02 | 0.816761 | 0.66709883 | 21.73949 | 0.071849 | 44.41 |
| 603608 | 2017 | -0.88 | 0.02 | 0.816761 | 0.66709883 | 21.76454 | 0.091753 | 21.96 |
| 2465   | 2017 | 0.942 | 0.02 | 0.816761 | 0.66709883 | 23.19429 | 0.039766 | 21.76 |
| 300503 | 2017 | 0.512 | 0.02 | 0.816761 | 0.66709883 | 20.87948 | 0.095977 | 35.82 |
| 2030   | 2017 | 1.335 | 0.02 | 0.816761 | 0.66709883 | 22.25837 | 0.036386 | 16.63 |
| 2833   | 2017 | -0.55 | 0.02 | 0.816761 | 0.66709883 | 20.84915 | 0.246222 | 40.24 |
| 600098 | 2017 | -0.58 | 0.02 | 0.816761 | 0.66709883 | 24.37521 | 0.046447 | 62.69 |
| 2572   | 2017 | -0.69 | 0.02 | 0.816761 | 0.66709883 | 22.6777  | 0.184049 | 21.61 |
| 2465   | 2017 | 1.699 | 0.02 | 0.816761 | 0.66709883 | 23.19429 | 0.039766 | 21.76 |
| 600143 | 2017 | 0.728 | 0.02 | 0.816761 | 0.66709883 | 23.75582 | 0.054897 | 18.79 |
| 523    | 2017 | -0.2  | 0.02 | 0.816761 | 0.66709883 | 22.29451 | 0.018369 | 30.04 |
| 600894 | 2017 | -0.04 | 0.02 | 0.816761 | 0.66709883 | 22.94235 | 0.059393 | 56.56 |
| 300219 | 2017 | -0.32 | 0.02 | 0.816761 | 0.66709883 | 22.32708 | 0.126216 | 23.99 |
| 2420   | 2017 | -0.73 | 0.02 | 0.816761 | 0.66709883 | 22.14053 | -0.40236 | 25.98 |
| 2177   | 2017 | 1.563 | 0.02 | 0.816761 | 0.66709883 | 21.44712 | 0.008144 | 20.44 |
| 300310 | 2017 | 0.875 | 0.02 | 0.816761 | 0.66709883 | 22.23884 | 0.060985 | 7.84  |
| 603309 | 2017 | 0.644 | 0.02 | 0.816761 | 0.66709883 | 20.73392 | 0.066953 | 37.39 |
| 300530 | 2017 | 1.207 | 0.02 | 0.816761 | 0.66709883 | 20.11232 | 0.109239 | 60.4  |
| 2311   | 2017 | 0.481 | 0.02 | 0.816761 | 0.66709883 | 23.30048 | 0.179388 | 57.81 |
| 2152   | 2017 | -0.05 | 0.02 | 0.816761 | 0.66709883 | 23.26418 | 0.101642 | 52.52 |
| 2311   | 2017 | 0.481 | 0.02 | 0.816761 | 0.66709883 | 23.30048 | 0.179388 | 57.81 |
| 601238 | 2017 | -0.55 | 0.02 | 0.816761 | 0.66709883 | 25.50744 | 0.153694 | 53.65 |
| 2192   | 2017 | 0.184 | 0.02 | 0.816761 | 0.66709883 | 20.79832 | 0.053512 | 23.65 |
| 300030 | 2017 | 0.891 | 0.02 | 0.816761 | 0.66709883 | 21.28052 | 0.008556 | 23.43 |
| 300219 | 2017 | -0.56 | 0.02 | 0.816761 | 0.66709883 | 22.32708 | 0.126216 | 23.99 |
| 2678   | 2017 | 0.667 | 0.02 | 0.816761 | 0.66709883 | 22.15107 | 0.049549 | 74.18 |
| 300030 | 2017 | 0.733 | 0.02 | 0.816761 | 0.66709883 | 21.28052 | 0.008556 | 23.43 |
| 2169   | 2017 | -0.07 | 0.02 | 0.816761 | 0.66709883 | 22.16021 | 0.051356 | 19.32 |
| 300030 | 2017 | 0.339 | 0.02 | 0.816761 | 0.66709883 | 21.28052 | 0.008556 | 23.43 |
| 2169   | 2017 | 0.382 | 0.02 | 0.816761 | 0.66709883 | 22.16021 | 0.051356 | 19.32 |
| 2420   | 2017 | -0.57 | 0.02 | 0.816761 | 0.66709883 | 22.14053 | -0.40236 | 25.98 |
| 2169   | 2017 | 0.162 | 0.02 | 0.816761 | 0.66709883 | 22.16021 | 0.051356 | 19.32 |
| 601238 | 2017 | -0.55 | 0.02 | 0.816761 | 0.66709883 | 25.50744 | 0.153694 | 53.65 |
| 2311   | 2017 | 0.481 | 0.02 | 0.816761 | 0.66709883 | 23.30048 | 0.179388 | 57.81 |
| 2400   | 2017 | 0.422 | 0.02 | 0.816761 | 0.66709883 | 22.85977 | -0.01906 | 15.3  |
| 2084   | 2017 | -0.02 | 0.02 | 0.816761 | 0.66709883 | 21.61619 | 0.057743 | 27.09 |
| 2169   | 2017 | -0.07 | 0.02 | 0.816761 | 0.66709883 | 22.16021 | 0.051356 | 19.32 |
| 2169   | 2017 | -0.07 | 0.02 | 0.816761 | 0.66709883 | 22.16021 | 0.051356 | 19.32 |

|        |      |       |      |          |            |          |          |       |
|--------|------|-------|------|----------|------------|----------|----------|-------|
| 600894 | 2017 | -0.6  | 0.02 | 0.816761 | 0.66709883 | 22.94235 | 0.059393 | 56.56 |
| 300448 | 2017 | 0.191 | 0.02 | 0.816761 | 0.66709883 | 21.02291 | 0.102382 | 36.14 |
| 2084   | 2017 | -0.46 | 0.02 | 0.816761 | 0.66709883 | 21.61619 | 0.057743 | 27.09 |
| 601238 | 2017 | -0.04 | 0.02 | 0.816761 | 0.66709883 | 25.50744 | 0.153694 | 53.65 |
| 2030   | 2017 | 0.893 | 0.02 | 0.816761 | 0.66709883 | 22.25837 | 0.036386 | 16.63 |
| 2420   | 2017 | -0.73 | 0.02 | 0.816761 | 0.66709883 | 22.14053 | -0.40236 | 25.98 |
| 300530 | 2017 | 1.207 | 0.02 | 0.816761 | 0.66709883 | 20.11232 | 0.109239 | 60.4  |
| 2311   | 2017 | 0.481 | 0.02 | 0.816761 | 0.66709883 | 23.30048 | 0.179388 | 57.81 |
| 2169   | 2017 | 0.737 | 0.02 | 0.816761 | 0.66709883 | 22.16021 | 0.051356 | 19.32 |
| 300177 | 2017 | 1.169 | 0.02 | 0.816761 | 0.66709883 | 21.63728 | 0.045559 | 26.16 |
| 600098 | 2017 | -0.58 | 0.02 | 0.816761 | 0.66709883 | 24.37521 | 0.046447 | 62.69 |
| 300238 | 2017 | 0.551 | 0.02 | 0.816761 | 0.66709883 | 21.29897 | 0.028605 | 20.76 |
| 600143 | 2017 | 0.633 | 0.02 | 0.816761 | 0.66709883 | 23.75582 | 0.054897 | 18.79 |
| 300098 | 2017 | 1.264 | 0.02 | 0.816761 | 0.66709883 | 22.74241 | 0.077624 | 31.58 |
| 2045   | 2017 | 0.143 | 0.02 | 0.816761 | 0.66709883 | 22.14994 | 0.085454 | 21.88 |
| 300404 | 2017 | 1.062 | 0.02 | 0.816761 | 0.66709883 | 20.1694  | -0.0646  | 38.51 |
| 300438 | 2017 | -0.64 | 0.02 | 0.816761 | 0.66709883 | 21.76092 | 0.124301 | 31.94 |
| 300438 | 2017 | 0.354 | 0.02 | 0.816761 | 0.66709883 | 22.02484 | 0.124301 | 31.94 |
| 2152   | 2017 | -0.28 | 0.02 | 0.816761 | 0.66709883 | 23.26418 | 0.101642 | 52.52 |
| 300499 | 2017 | 0.38  | 0.02 | 0.816761 | 0.66709883 | 20.74745 | 0.066462 | 20.55 |
| 2465   | 2017 | 0.942 | 0.02 | 0.816761 | 0.66709883 | 23.19429 | 0.039766 | 21.76 |
| 2544   | 2017 | 0.74  | 0.02 | 0.816761 | 0.66709883 | 22.56838 | 0.096991 | 31.13 |
| 300098 | 2017 | 0.814 | 0.02 | 0.816761 | 0.66709883 | 22.74241 | 0.077624 | 31.58 |
| 2420   | 2017 | -0.73 | 0.02 | 0.816761 | 0.66709883 | 22.14053 | -0.40236 | 25.98 |
| 600098 | 2017 | -0.58 | 0.02 | 0.816761 | 0.66709883 | 24.37521 | 0.046447 | 62.69 |
| 601238 | 2017 | -0.03 | 0.02 | 0.816761 | 0.66709883 | 25.50744 | 0.153694 | 53.65 |
| 2084   | 2017 | -0.46 | 0.02 | 0.816761 | 0.66709883 | 21.61619 | 0.057743 | 27.09 |
| 600143 | 2017 | 0.647 | 0.02 | 0.816761 | 0.66709883 | 23.75582 | 0.054897 | 18.79 |
| 2572   | 2017 | -0.54 | 0.02 | 0.816761 | 0.66709883 | 22.6777  | 0.184049 | 21.61 |
| 2030   | 2017 | 0.784 | 0.02 | 0.816761 | 0.66709883 | 22.25837 | 0.036386 | 16.63 |
| 300177 | 2017 | 1.169 | 0.02 | 0.816761 | 0.66709883 | 21.63728 | 0.045559 | 26.16 |
| 300030 | 2017 | 1.111 | 0.02 | 0.816761 | 0.66709883 | 21.12566 | 0.008556 | 23.43 |
| 600894 | 2017 | -0.24 | 0.02 | 0.816761 | 0.66709883 | 22.94235 | 0.059393 | 56.56 |
| 600685 | 2017 | 0.228 | 0.02 | 0.816761 | 0.66709883 | 24.51103 | 0.008424 | 41.68 |
| 2152   | 2017 | 0.833 | 0.02 | 0.816761 | 0.66709883 | 23.26418 | 0.101642 | 52.52 |
| 300297 | 2017 | 1.325 | 0.02 | 0.816761 | 0.66709883 | 22.83819 | 0.107922 | 15.23 |
| 2192   | 2017 | 0.184 | 0.02 | 0.816761 | 0.66709883 | 20.79832 | 0.053512 | 23.65 |
| 2465   | 2017 | 0.92  | 0.02 | 0.816761 | 0.66709883 | 23.19429 | 0.039766 | 21.76 |
| 600029 | 2017 | 0.195 | 0.02 | 0.816761 | 0.66709883 | 25.74206 | 0.109917 | 40.04 |
| 2060   | 2017 | -0.26 | 0.02 | 0.816761 | 0.66709883 | 23.58634 | 0.054652 | 34.53 |
| 2152   | 2017 | -0.49 | 0.02 | 0.816761 | 0.66709883 | 23.26418 | 0.101642 | 52.52 |
| 2544   | 2017 | 0.418 | 0.02 | 0.816761 | 0.66709883 | 22.56838 | 0.096991 | 31.13 |
| 539    | 2017 | -0.54 | 0.02 | 0.816761 | 0.66709883 | 24.98605 | 0.038303 | 67.39 |
| 2656   | 2017 | 0.617 | 0.02 | 0.816761 | 0.66709883 | 21.94156 | 0.04674  | 28.56 |
| 2030   | 2017 | 0.01  | 0.02 | 0.816761 | 0.66709883 | 22.25837 | 0.036386 | 16.63 |
| 2152   | 2017 | 0.833 | 0.02 | 0.816761 | 0.66709883 | 23.10332 | 0.101642 | 52.52 |
| 2461   | 2017 | 0.084 | 0.02 | 0.816761 | 0.66709883 | 23.14847 | 0.024779 | 31.98 |
| 2027   | 2017 | -0.35 | 0.02 | 0.816761 | 0.66709883 | 23.46762 | 0.302158 | 23.34 |
| 2177   | 2017 | 0.99  | 0.02 | 0.816761 | 0.66709883 | 21.58307 | 0.008144 | 20.44 |
| 600098 | 2017 | -0.42 | 0.02 | 0.816761 | 0.66709883 | 24.37521 | 0.046447 | 62.69 |
| 2152   | 2017 | -0.05 | 0.02 | 0.816761 | 0.66709883 | 23.26418 | 0.101642 | 52.52 |
| 2461   | 2017 | -0.25 | 0.02 | 0.816761 | 0.66709883 | 23.14847 | 0.024779 | 31.98 |
| 2461   | 2017 | -0.22 | 0.02 | 0.816761 | 0.66709883 | 23.14847 | 0.024779 | 31.98 |
| 600894 | 2017 | -0.25 | 0.02 | 0.816761 | 0.66709883 | 22.94235 | 0.059393 | 56.56 |

|        |      |       |      |          |            |          |          |       |
|--------|------|-------|------|----------|------------|----------|----------|-------|
| 300448 | 2017 | 0.004 | 0.02 | 0.816761 | 0.66709883 | 21.02291 | 0.102382 | 36.14 |
| 300499 | 2017 | 0.314 | 0.02 | 0.816761 | 0.66709883 | 20.80468 | 0.066462 | 20.55 |
| 2311   | 2017 | 0.481 | 0.02 | 0.816761 | 0.66709883 | 23.30048 | 0.179388 | 57.81 |
| 2683   | 2017 | -0.43 | 0.02 | 0.816761 | 0.66709883 | 22.56982 | 0.055065 | 21.13 |
| 300030 | 2017 | 0.733 | 0.02 | 0.816761 | 0.66709883 | 21.28052 | 0.008556 | 23.43 |
| 600143 | 2017 | 0.647 | 0.02 | 0.816761 | 0.66709883 | 23.75582 | 0.054897 | 18.79 |
| 2027   | 2017 | -0.69 | 0.02 | 0.816761 | 0.66709883 | 23.46762 | 0.302158 | 23.34 |
| 601238 | 2017 | -0.55 | 0.02 | 0.816761 | 0.66709883 | 25.50744 | 0.153694 | 53.65 |
| 600728 | 2017 | 0.475 | 0.02 | 0.816761 | 0.66709883 | 22.54795 | 0.066329 | 10.34 |
| 600143 | 2017 | 0.755 | 0.02 | 0.816761 | 0.66709883 | 23.75582 | 0.054897 | 18.79 |
| 601238 | 2017 | -0.47 | 0.02 | 0.816761 | 0.66709883 | 25.06037 | 0.153694 | 53.65 |
| 2833   | 2017 | -0.55 | 0.02 | 0.816761 | 0.66709883 | 20.84915 | 0.246222 | 40.24 |
| 2209   | 2017 | 0.92  | 0.02 | 0.816761 | 0.66709883 | 21.22849 | 0.031813 | 19.55 |
| 2152   | 2017 | 0.213 | 0.02 | 0.816761 | 0.66709883 | 23.26418 | 0.101642 | 52.52 |
| 2060   | 2017 | -0.32 | 0.02 | 0.816761 | 0.66709883 | 23.58634 | 0.054652 | 34.53 |
| 2311   | 2017 | 0.333 | 0.02 | 0.816761 | 0.66709883 | 23.30048 | 0.179388 | 57.81 |
| 2152   | 2017 | -0.16 | 0.02 | 0.816761 | 0.66709883 | 23.26418 | 0.101642 | 52.52 |
| 600332 | 2017 | 0.466 | 0.02 | 0.816761 | 0.66709883 | 24.06665 | 0.10999  | 45.04 |
| 429    | 2017 | -0.97 | 0.02 | 0.816761 | 0.66709883 | 23.52804 | 0.180897 | 24.55 |
| 2465   | 2017 | 1.037 | 0.02 | 0.816761 | 0.66709883 | 23.19429 | 0.039766 | 21.76 |
| 300030 | 2017 | 0.733 | 0.02 | 0.816761 | 0.66709883 | 21.28052 | 0.008556 | 23.43 |
| 300438 | 2017 | 0.049 | 0.02 | 0.816761 | 0.66709883 | 22.02484 | 0.124301 | 31.94 |
| 600332 | 2017 | 0.466 | 0.02 | 0.816761 | 0.66709883 | 24.06665 | 0.10999  | 45.04 |
| 300219 | 2017 | -0.27 | 0.02 | 0.816761 | 0.66709883 | 22.32708 | 0.126216 | 23.99 |
| 2420   | 2017 | -0.73 | 0.02 | 0.816761 | 0.66709883 | 22.14053 | -0.40236 | 25.98 |
| 2420   | 2017 | -0.53 | 0.02 | 0.816761 | 0.66709883 | 22.14053 | -0.40236 | 25.98 |
| 2465   | 2017 | 0.595 | 0.02 | 0.816761 | 0.66709883 | 23.19429 | 0.039766 | 21.76 |
| 300147 | 2017 | 0.863 | 0.02 | 0.816761 | 0.66709883 | 22.94688 | 0.02887  | 34.11 |
| 600143 | 2017 | 0.461 | 0.02 | 0.816761 | 0.66709883 | 23.75582 | 0.054897 | 18.79 |
| 2030   | 2017 | 0.01  | 0.02 | 0.816761 | 0.66709883 | 22.25837 | 0.036386 | 16.63 |
| 300530 | 2017 | 1.207 | 0.02 | 0.816761 | 0.66709883 | 20.11232 | 0.109239 | 60.4  |
| 600685 | 2017 | 0.67  | 0.02 | 0.816761 | 0.66709883 | 24.51103 | 0.008424 | 41.68 |
| 2709   | 2017 | -0.22 | 0.02 | 0.816761 | 0.66709883 | 22.02936 | 0.113892 | 39.93 |
| 600098 | 2017 | -0.35 | 0.02 | 0.816761 | 0.66709883 | 24.37521 | 0.046447 | 62.69 |
| 2420   | 2017 | -0.53 | 0.02 | 0.816761 | 0.66709883 | 22.14053 | -0.40236 | 25.98 |
| 2572   | 2017 | -0.51 | 0.02 | 0.816761 | 0.66709883 | 22.6777  | 0.184049 | 21.61 |
| 2572   | 2017 | -0.25 | 0.02 | 0.816761 | 0.66709883 | 22.6777  | 0.184049 | 21.61 |
| 2572   | 2017 | 0.636 | 0.02 | 0.816761 | 0.66709883 | 22.31899 | 0.184049 | 21.61 |
| 300098 | 2017 | 1.264 | 0.02 | 0.816761 | 0.66709883 | 22.74241 | 0.077624 | 31.58 |
| 2084   | 2017 | -0.46 | 0.02 | 0.816761 | 0.66709883 | 21.61619 | 0.057743 | 27.09 |
| 300438 | 2017 | -0.08 | 0.02 | 0.816761 | 0.66709883 | 22.02484 | 0.124301 | 31.94 |
| 300310 | 2017 | 0.345 | 0.02 | 0.816761 | 0.66709883 | 22.23884 | 0.060985 | 7.84  |
| 600685 | 2017 | 0.15  | 0.02 | 0.816761 | 0.66709883 | 24.51103 | 0.008424 | 41.68 |
| 300238 | 2017 | 0.551 | 0.02 | 0.816761 | 0.66709883 | 21.29897 | 0.028605 | 20.76 |
| 300438 | 2017 | -0.64 | 0.02 | 0.816761 | 0.66709883 | 22.02484 | 0.124301 | 31.94 |
| 300098 | 2017 | 1.264 | 0.02 | 0.816761 | 0.66709883 | 22.74241 | 0.077624 | 31.58 |
| 600143 | 2017 | 0.461 | 0.02 | 0.816761 | 0.66709883 | 23.75582 | 0.054897 | 18.79 |
| 600332 | 2017 | 0.466 | 0.02 | 0.816761 | 0.66709883 | 24.06665 | 0.10999  | 45.04 |
| 300310 | 2017 | 0.875 | 0.02 | 0.816761 | 0.66709883 | 22.23884 | 0.060985 | 7.84  |
| 600728 | 2017 | 0.712 | 0.02 | 0.816761 | 0.66709883 | 22.54795 | 0.066329 | 10.34 |
| 539    | 2017 | -0.91 | 0.02 | 0.816761 | 6.67E-01   | 24.98605 | 0.038303 | 67.39 |
| 600332 | 2017 | -0.1  | 0.02 | 0.816761 | 6.67E-01   | 24.06665 | 0.10999  | 45.04 |
| 300448 | 2017 | 0.191 | 0.02 | 0.816761 | 6.67E-01   | 21.02291 | 0.102382 | 36.14 |
| 2461   | 2017 | -0.58 | 0.02 | 0.816761 | 6.67E-01   | 23.14847 | 0.024779 | 31.98 |

|        |      |       |      |          |            |          |          |       |
|--------|------|-------|------|----------|------------|----------|----------|-------|
| 2420   | 2017 | -0.73 | 0.02 | 0.816761 | 6.67E-01   | 22.14053 | -0.40236 | 25.98 |
| 603002 | 2017 | 0.863 | 0.02 | 0.816761 | 6.67E-01   | 21.22481 | 0.07144  | 41.29 |
| 2060   | 2017 | 0.178 | 0.02 | 0.816761 | 6.67E-01   | 23.58634 | 0.054652 | 34.53 |
| 600143 | 2017 | 0.167 | 0.02 | 0.816761 | 6.67E-01   | 23.75582 | 0.054897 | 18.79 |
| 2311   | 2017 | 0.481 | 0.02 | 0.816761 | 6.67E-01   | 23.30048 | 0.179388 | 57.81 |
| 300098 | 2017 | -0.06 | 0.02 | 0.816761 | 6.67E-01   | 22.74241 | 0.077624 | 31.58 |
| 2152   | 2017 | 0.833 | 0.02 | 0.816761 | 6.67E-01   | 23.26418 | 0.101642 | 52.52 |
| 300147 | 2017 | 0.157 | 0.02 | 0.816761 | 6.67E-01   | 22.94688 | 0.02887  | 34.11 |
| 2060   | 2017 | -0.06 | 0.02 | 0.816761 | 6.67E-01   | 23.58634 | 0.054652 | 34.53 |
| 2709   | 2017 | 0.852 | 0.02 | 0.816761 | 6.67E-01   | 22.02936 | 0.113892 | 39.93 |
| 300219 | 2017 | -0.56 | 0.02 | 0.816761 | 6.67E-01   | 22.32708 | 0.126216 | 23.99 |
| 2308   | 2017 | 0.974 | 0.02 | 0.816761 | 6.67E-01   | 22.18317 | 0.055102 | 33.09 |
| 601238 | 2017 | -0.15 | 0.02 | 0.816761 | 6.67E-01   | 25.50744 | 0.153694 | 53.65 |
| 2678   | 2017 | 0.721 | 0.02 | 0.816761 | 6.67E-01   | 22.15107 | 0.049549 | 74.18 |
| 539    | 2017 | -0.25 | 0.02 | 0.816761 | 0.66709883 | 24.98605 | 0.038303 | 67.39 |
| 539    | 2017 | -0.68 | 0.02 | 0.816761 | 0.66709883 | 24.98605 | 0.038303 | 67.39 |
| 2544   | 2017 | -0.17 | 0.02 | 0.816761 | 0.66709883 | 22.56838 | 0.096991 | 31.13 |
| 2420   | 2017 | -0.73 | 0.02 | 0.816761 | 0.66709883 | 22.14053 | -0.40236 | 25.98 |
| 300147 | 2017 | 0.863 | 0.02 | 0.816761 | 0.66709883 | 22.75558 | 0.02887  | 34.11 |
| 300219 | 2017 | 0.099 | 0.02 | 0.816761 | 0.66709883 | 22.32708 | 0.126216 | 23.99 |
| 601238 | 2017 | -0.55 | 0.02 | 0.816761 | 0.66709883 | 25.50744 | 0.153694 | 53.65 |
| 603608 | 2017 | 0.444 | 0.02 | 0.816761 | 0.66709883 | 21.76454 | 0.091753 | 21.96 |
| 300177 | 2017 | 0.728 | 0.02 | 0.816761 | 0.66709883 | 21.63728 | 0.045559 | 26.16 |
| 523    | 2017 | 0.825 | 0.02 | 0.816761 | 0.66709883 | 22.29451 | 0.018369 | 30.04 |
| 2709   | 2017 | 0.41  | 0.02 | 0.816761 | 0.66709883 | 22.02936 | 0.113892 | 39.93 |
| 300147 | 2017 | 0.863 | 0.02 | 0.816761 | 0.66709883 | 22.94688 | 0.02887  | 34.11 |
| 601238 | 2017 | -0.55 | 0.02 | 0.816761 | 0.66709883 | 25.50744 | 0.153694 | 53.65 |
| 2169   | 2017 | -0.01 | 0.02 | 0.816761 | 0.66709883 | 21.8174  | 0.051356 | 19.32 |
| 2311   | 2017 | 0.481 | 0.02 | 0.816761 | 0.66709883 | 23.30048 | 0.179388 | 57.81 |
| 600332 | 2017 | 0.466 | 0.02 | 0.816761 | 0.66709883 | 24.06665 | 0.10999  | 45.04 |
| 2465   | 2017 | 0.374 | 0.02 | 0.816761 | 0.66709883 | 23.19429 | 0.039766 | 21.76 |
| 600098 | 2017 | -0.58 | 0.02 | 0.816761 | 0.66709883 | 24.37521 | 0.046447 | 62.69 |
| 2311   | 2017 | 0.481 | 0.02 | 0.816761 | 0.66709883 | 22.96005 | 0.179388 | 57.81 |
| 2465   | 2017 | 0.942 | 0.02 | 0.816761 | 0.66709883 | 23.19429 | 0.039766 | 21.76 |
| 300219 | 2017 | -0.45 | 0.02 | 0.816761 | 0.66709883 | 22.32708 | 0.126216 | 23.99 |
| 600685 | 2017 | -0.65 | 0.02 | 0.816761 | 0.66709883 | 24.51103 | 0.008424 | 41.68 |
| 300098 | 2017 | 0.873 | 0.02 | 0.816761 | 0.66709883 | 22.74241 | 0.077624 | 31.58 |
| 300310 | 2017 | -0.45 | 0.02 | 0.816761 | 0.66709883 | 22.23884 | 0.060985 | 7.84  |
| 300521 | 2017 | 0.031 | 0.02 | 0.816761 | 0.66709883 | 20.11844 | 0.074217 | 34.12 |
| 2192   | 2017 | -0.33 | 0.02 | 0.816761 | 0.66709883 | 20.79832 | 0.053512 | 23.65 |
| 300335 | 2017 | -0.03 | 0.02 | 0.816761 | 0.66709883 | 21.9381  | 0.169287 | 14.04 |
| 300438 | 2017 | 0.049 | 0.02 | 0.816761 | 0.66709883 | 22.02484 | 0.124301 | 31.94 |
| 300297 | 2017 | 1.325 | 0.02 | 0.816761 | 0.66709883 | 22.83819 | 0.107922 | 15.23 |
| 2656   | 2017 | 0.176 | 0.02 | 0.816761 | 0.66709883 | 21.94156 | 0.04674  | 28.56 |
| 600332 | 2017 | 0.466 | 0.02 | 0.816761 | 0.66709883 | 24.06665 | 0.10999  | 45.04 |
| 600098 | 2017 | -0.27 | 0.02 | 0.816761 | 0.66709883 | 24.37521 | 0.046447 | 62.69 |
| 600332 | 2017 | -0.77 | 0.02 | 0.816761 | 0.66709883 | 24.06665 | 0.10999  | 45.04 |
| 2420   | 2017 | -0.73 | 0.02 | 0.816761 | 0.66709883 | 22.14053 | -0.40236 | 25.98 |
| 601238 | 2017 | -0.1  | 0.02 | 0.816761 | 0.66709883 | 25.50744 | 0.153694 | 53.65 |
| 2177   | 2017 | 0.238 | 0.02 | 0.816761 | 0.66709883 | 21.44712 | 0.008144 | 20.44 |
| 600332 | 2017 | -0.1  | 0.02 | 0.816761 | 0.66709883 | 24.06665 | 0.10999  | 45.04 |
| 2045   | 2017 | -0.39 | 0.02 | 0.816761 | 0.66709883 | 22.14994 | 0.085454 | 21.88 |
| 2709   | 2017 | 0.795 | 0.02 | 0.816761 | 0.66709883 | 22.02936 | 0.113892 | 39.93 |
| 601238 | 2017 | -0.55 | 0.02 | 0.816761 | 0.66709883 | 25.50744 | 0.153694 | 53.65 |

|        |      |       |      |          |            |          |          |       |
|--------|------|-------|------|----------|------------|----------|----------|-------|
| 2683   | 2017 | 0.134 | 0.02 | 0.816761 | 0.66709883 | 22.56982 | 0.055065 | 21.13 |
| 300424 | 2017 | 0.394 | 0.02 | 0.816761 | 0.66709883 | 20.92906 | 0.073378 | 21.99 |
| 600332 | 2017 | -0.86 | 0.02 | 0.816761 | 0.66709883 | 24.06665 | 0.10999  | 45.04 |
| 300177 | 2017 | 0.789 | 0.02 | 0.816761 | 0.66709883 | 21.63728 | 0.045559 | 26.16 |
| 300297 | 2017 | 1.325 | 0.02 | 0.816761 | 0.66709883 | 22.17743 | 0.107922 | 15.23 |
| 600894 | 2017 | 0.09  | 0.02 | 0.816761 | 0.66709883 | 22.94235 | 0.059393 | 56.56 |
| 2465   | 2017 | 1.257 | 0.02 | 0.816761 | 0.66709883 | 23.19429 | 0.039766 | 21.76 |
| 2192   | 2017 | 0.184 | 0.02 | 0.816761 | 0.66709883 | 20.79832 | 0.053512 | 23.65 |
| 600728 | 2017 | 0.475 | 0.02 | 0.816761 | 0.66709883 | 22.54795 | 0.066329 | 10.34 |
| 2152   | 2017 | 0.833 | 0.02 | 0.816761 | 0.66709883 | 23.26418 | 0.101642 | 52.52 |
| 2192   | 2017 | 0.184 | 0.02 | 0.816761 | 0.66709883 | 20.79672 | 0.053512 | 23.65 |
| 603608 | 2017 | -0.22 | 0.02 | 0.816761 | 0.66709883 | 21.76454 | 0.091753 | 21.96 |
| 539    | 2017 | -0.38 | 0.02 | 0.816761 | 0.66709883 | 24.98605 | 0.038303 | 67.39 |
| 2461   | 2017 | -0.58 | 0.02 | 0.816761 | 0.66709883 | 23.05127 | 0.024779 | 31.98 |
| 600098 | 2017 | -0.58 | 0.02 | 0.816761 | 0.66709883 | 24.37521 | 0.046447 | 62.69 |
| 601238 | 2017 | -0.36 | 0.02 | 0.816761 | 0.66709883 | 25.50744 | 0.153694 | 53.65 |
| 300147 | 2017 | -0.46 | 0.02 | 0.816761 | 0.66709883 | 22.94688 | 0.02887  | 34.11 |
| 300530 | 2017 | 1.207 | 0.02 | 0.816761 | 0.66709883 | 20.11232 | 0.109239 | 60.4  |
| 600685 | 2017 | 0.108 | 0.02 | 0.816761 | 0.66709883 | 24.51103 | 0.008424 | 41.68 |
| 2709   | 2017 | -0.47 | 0.02 | 0.816761 | 0.66709883 | 22.02936 | 0.113892 | 39.93 |
| 2709   | 2017 | 0.795 | 0.02 | 0.816761 | 0.66709883 | 22.02936 | 0.113892 | 39.93 |
| 600098 | 2017 | -0.58 | 0.02 | 0.816761 | 0.66709883 | 24.37521 | 0.046447 | 62.69 |
| 2709   | 2017 | -0.03 | 0.02 | 0.816761 | 0.66709883 | 22.02936 | 0.113892 | 39.93 |
| 600894 | 2017 | -0.55 | 0.02 | 0.816761 | 0.66709883 | 22.94235 | 0.059393 | 56.56 |
| 300238 | 2017 | 0.551 | 0.02 | 0.816761 | 0.66709883 | 21.12367 | 0.028605 | 20.76 |
| 300482 | 2017 | 0.11  | 0.02 | 0.816761 | 0.66709883 | 21.25081 | 0.18914  | 24.55 |
| 2461   | 2017 | -0.22 | 0.02 | 0.816761 | 0.66709883 | 23.14847 | 0.024779 | 31.98 |
| 600728 | 2017 | 0.807 | 0.02 | 0.816761 | 0.66709883 | 22.54795 | 0.066329 | 10.34 |
| 2544   | 2017 | 0.785 | 0.02 | 0.816761 | 0.66709883 | 22.56838 | 0.096991 | 31.13 |
| 2027   | 2017 | -0.88 | 0.02 | 0.816761 | 0.66709883 | 23.46762 | 0.302158 | 23.34 |
| 2572   | 2017 | -0.69 | 0.02 | 0.816761 | 0.66709883 | 22.6777  | 0.184049 | 21.61 |
| 2060   | 2017 | 0.032 | 0.02 | 0.816761 | 0.66709883 | 23.58634 | 0.054652 | 34.53 |
| 2045   | 2017 | 0.934 | 0.02 | 0.816761 | 0.66709883 | 22.14994 | 0.085454 | 21.88 |
| 300177 | 2017 | 1.611 | 0.02 | 0.816761 | 0.66709883 | 21.63728 | 0.045559 | 26.16 |
| 600143 | 2017 | -0.57 | 0.02 | 0.816761 | 0.66709883 | 23.75582 | 0.054897 | 18.79 |
| 2027   | 2017 | -0.35 | 0.02 | 0.816761 | 0.66709883 | 23.46762 | 0.302158 | 23.34 |
| 2420   | 2017 | -0.47 | 0.02 | 0.816761 | 0.66709883 | 22.14053 | -0.40236 | 25.98 |
| 300098 | 2017 | 0.734 | 0.02 | 0.816761 | 0.66709883 | 22.74241 | 0.077624 | 31.58 |
| 600098 | 2017 | -0.58 | 0.02 | 0.816761 | 0.66709883 | 24.37521 | 0.046447 | 62.69 |
| 2311   | 2017 | 0.481 | 0.02 | 0.816761 | 0.66709883 | 23.30048 | 0.179388 | 57.81 |
| 300404 | 2017 | 1.062 | 0.02 | 0.816761 | 0.66709883 | 20.1694  | -0.0646  | 38.51 |
| 2833   | 2017 | -0.55 | 0.02 | 0.816761 | 0.66709883 | 20.82647 | 0.246222 | 40.24 |
| 600894 | 2017 | -0.6  | 0.02 | 0.816761 | 0.66709883 | 22.94235 | 0.059393 | 56.56 |
| 2030   | 2017 | 1.335 | 0.02 | 0.816761 | 0.66709883 | 22.25837 | 0.036386 | 16.63 |
| 2311   | 2017 | 0.481 | 0.02 | 0.816761 | 0.66709883 | 23.30048 | 0.179388 | 57.81 |
| 2169   | 2017 | -0.28 | 0.02 | 0.816761 | 0.66709883 | 22.16021 | 0.051356 | 19.32 |
| 2152   | 2017 | -0.16 | 0.02 | 0.816761 | 0.66709883 | 23.26418 | 0.101642 | 52.52 |
| 300297 | 2017 | 1.325 | 0.02 | 0.816761 | 0.66709883 | 22.83819 | 0.107922 | 15.23 |
| 2030   | 2017 | 0.672 | 0.02 | 0.816761 | 0.66709883 | 22.25837 | 0.036386 | 16.63 |
| 600098 | 2017 | -0.52 | 0.02 | 0.816761 | 0.66709883 | 24.37521 | 0.046447 | 62.69 |
| 600728 | 2017 | 0.144 | 0.02 | 0.816761 | 0.66709883 | 22.54795 | 0.066329 | 10.34 |
| 524    | 2017 | -0.99 | 0.02 | 0.816761 | 0.66709883 | 22.21348 | 0.071849 | 44.41 |
| 2030   | 2017 | 1.335 | 0.02 | 0.816761 | 0.66709883 | 22.25837 | 0.036386 | 16.63 |
| 300177 | 2017 | 0.976 | 0.02 | 0.816761 | 0.66709883 | 21.63728 | 0.045559 | 26.16 |

|        |      |       |      |          |            |          |          |       |
|--------|------|-------|------|----------|------------|----------|----------|-------|
| 2683   | 2017 | 0.512 | 0.02 | 0.816761 | 0.66709883 | 22.56982 | 0.055065 | 21.13 |
| 2663   | 2017 | 0.118 | 0.02 | 0.816761 | 0.66709883 | 23.02447 | 0.033934 | 22.87 |
| 2683   | 2017 | -0.31 | 0.02 | 0.816761 | 0.66709883 | 22.56982 | 0.055065 | 21.13 |
| 2311   | 2017 | 0.481 | 0.02 | 0.816761 | 0.66709883 | 23.30048 | 0.179388 | 57.81 |
| 300147 | 2017 | 0.106 | 0.02 | 0.816761 | 0.66709883 | 22.94688 | 0.02887  | 34.11 |
| 2683   | 2017 | -0.2  | 0.02 | 0.816761 | 0.66709883 | 22.56982 | 0.055065 | 21.13 |
| 600685 | 2017 | 0.068 | 0.02 | 0.816761 | 0.66709883 | 24.51103 | 0.008424 | 41.68 |
| 2683   | 2017 | 0.891 | 0.02 | 0.816761 | 0.66709883 | 22.56982 | 0.055065 | 21.13 |
| 2683   | 2017 | -0.01 | 0.02 | 0.816761 | 0.66709883 | 22.56982 | 0.055065 | 21.13 |
| 2311   | 2017 | 0.481 | 0.02 | 0.816761 | 0.66709883 | 23.30048 | 0.179388 | 57.81 |
| 600098 | 2017 | 0.078 | 0.02 | 0.816761 | 0.66709883 | 24.37521 | 0.046447 | 62.69 |
| 300499 | 2017 | 0.332 | 0.02 | 0.816761 | 0.66709883 | 20.80468 | 0.066462 | 20.55 |
| 300177 | 2017 | 1.169 | 0.02 | 0.816761 | 0.66709883 | 21.63728 | 0.045559 | 26.16 |
| 600098 | 2017 | -0.58 | 0.02 | 0.816761 | 0.66709883 | 24.37521 | 0.046447 | 62.69 |
| 2030   | 2017 | 0.649 | 0.02 | 0.816761 | 0.66709883 | 22.25837 | 0.036386 | 16.63 |
| 2308   | 2017 | 0.948 | 0.02 | 0.816761 | 0.66709883 | 22.18317 | 0.055102 | 33.09 |
| 300404 | 2017 | 1.062 | 0.02 | 0.816761 | 0.66709883 | 20.1694  | -0.0646  | 38.51 |
| 603002 | 2017 | 0.863 | 0.02 | 0.816761 | 0.66709883 | 21.22481 | 0.07144  | 41.29 |
| 300521 | 2017 | 0.693 | 0.02 | 0.816761 | 0.66709883 | 20.11844 | 0.074217 | 34.12 |
| 2678   | 2017 | 0.846 | 0.02 | 0.816761 | 0.66709883 | 22.15107 | 0.049549 | 74.18 |
| 2060   | 2017 | 0.218 | 0.02 | 0.816761 | 0.66709883 | 23.58634 | 0.054652 | 34.53 |
| 2027   | 2017 | -0.35 | 0.02 | 0.816761 | 0.66709883 | 23.46762 | 0.302158 | 23.34 |
| 2177   | 2017 | 1.563 | 0.02 | 0.816761 | 0.66709883 | 21.44712 | 0.008144 | 20.44 |
| 600098 | 2017 | 0.078 | 0.02 | 0.816761 | 0.66709883 | 24.37521 | 0.046447 | 62.69 |
| 300503 | 2017 | 0.256 | 0.02 | 0.816761 | 0.66709883 | 20.87948 | 0.095977 | 35.82 |
| 300177 | 2017 | 1.611 | 0.02 | 0.816761 | 0.66709883 | 21.63728 | 0.045559 | 26.16 |
| 600728 | 2017 | 0.542 | 0.02 | 0.816761 | 0.66709883 | 22.54795 | 0.066329 | 10.34 |
| 600143 | 2017 | 0.461 | 0.02 | 0.816761 | 6.67E-01   | 23.75582 | 0.054897 | 18.79 |
| 600685 | 2017 | 0.228 | 0.02 | 0.816761 | 6.67E-01   | 22.98871 | 0.008424 | 41.68 |
| 2060   | 2017 | 0.218 | 0.02 | 0.816761 | 6.67E-01   | 23.10611 | 0.054652 | 34.53 |
| 2027   | 2017 | 0.446 | 0.02 | 0.816761 | 6.67E-01   | 23.46762 | 0.302158 | 23.34 |
| 2544   | 2017 | -0.28 | 0.02 | 0.816761 | 6.67E-01   | 22.56838 | 0.096991 | 31.13 |
| 539    | 2017 | -0.25 | 0.02 | 0.816761 | 6.67E-01   | 24.98605 | 0.038303 | 67.39 |
| 600098 | 2017 | -0.58 | 0.02 | 0.816761 | 6.67E-01   | 24.37521 | 0.046447 | 62.69 |
| 2030   | 2017 | 1.335 | 0.02 | 0.816761 | 6.67E-01   | 22.25837 | 0.036386 | 16.63 |
| 600098 | 2017 | 0.078 | 0.02 | 0.816761 | 6.67E-01   | 24.37521 | 0.046447 | 62.69 |
| 300335 | 2017 | -0.03 | 0.02 | 0.816761 | 6.67E-01   | 21.9381  | 0.169287 | 14.04 |
| 601238 | 2017 | -0.55 | 0.02 | 0.816761 | 0.66709883 | 25.50744 | 0.153694 | 53.65 |
| 603309 | 2017 | -0.24 | 0.02 | 0.816761 | 0.66709883 | 20.73392 | 0.066953 | 37.39 |
| 300177 | 2017 | 1.611 | 0.02 | 0.816761 | 0.66709883 | 21.63728 | 0.045559 | 26.16 |
| 2465   | 2017 | 1.699 | 0.02 | 0.816761 | 0.66709883 | 23.19429 | 0.039766 | 21.76 |
| 300335 | 2017 | -0.29 | 0.02 | 0.816761 | 0.66709883 | 21.9381  | 0.169287 | 14.04 |
| 2709   | 2017 | 0.09  | 0.02 | 0.816761 | 0.66709883 | 22.02936 | 0.113892 | 39.93 |
| 300482 | 2017 | -0.2  | 0.02 | 0.816761 | 0.66709883 | 21.25081 | 0.18914  | 24.55 |
| 300297 | 2017 | 5E-04 | 0.02 | 0.816761 | 0.66709883 | 22.83819 | 0.107922 | 15.23 |
| 600894 | 2017 | -0.6  | 0.02 | 0.816761 | 0.66709883 | 22.94235 | 0.059393 | 56.56 |
| 300503 | 2017 | 0.512 | 0.02 | 0.816761 | 0.66709883 | 20.87948 | 0.095977 | 35.82 |
| 2709   | 2017 | 0.095 | 0.02 | 0.816761 | 0.66709883 | 22.02936 | 0.113892 | 39.93 |
| 300503 | 2017 | 0.256 | 0.02 | 0.816761 | 0.66709883 | 20.87948 | 0.095977 | 35.82 |
| 600728 | 2017 | 0.475 | 0.02 | 0.816761 | 0.66709883 | 22.54795 | 0.066329 | 10.34 |
| 2461   | 2017 | 0.158 | 0.02 | 0.816761 | 0.66709883 | 23.14847 | 0.024779 | 31.98 |
| 600098 | 2017 | -0.38 | 0.02 | 0.816761 | 0.66709883 | 24.37521 | 0.046447 | 62.69 |
| 600098 | 2017 | -0.14 | 0.02 | 0.816761 | 0.66709883 | 24.37521 | 0.046447 | 62.69 |
| 2152   | 2017 | -0.08 | 0.02 | 0.816761 | 0.66709883 | 23.26418 | 0.101642 | 52.52 |

|        |      |       |      |          |            |          |          |       |
|--------|------|-------|------|----------|------------|----------|----------|-------|
| 600728 | 2017 | 0.807 | 0.02 | 0.816761 | 0.66709883 | 22.54795 | 0.066329 | 10.34 |
| 600894 | 2017 | 0.065 | 0.02 | 0.816761 | 0.66709883 | 22.94235 | 0.059393 | 56.56 |
| 300499 | 2017 | -0.15 | 0.02 | 0.816761 | 0.66709883 | 20.80468 | 0.066462 | 20.55 |
| 300499 | 2017 | 0.292 | 0.02 | 0.816761 | 0.66709883 | 20.80468 | 0.066462 | 20.55 |
| 300219 | 2017 | -0.56 | 0.02 | 0.816761 | 0.66709883 | 22.10882 | 0.126216 | 23.99 |
| 600098 | 2017 | -0.36 | 0.02 | 0.816761 | 0.66709883 | 24.37521 | 0.046447 | 62.69 |
| 600029 | 2017 | -0.18 | 0.02 | 0.816761 | 0.66709883 | 25.74206 | 0.109917 | 40.04 |
| 2656   | 2017 | 0.087 | 0.02 | 0.816761 | 0.66709883 | 21.94156 | 0.04674  | 28.56 |
| 2045   | 2017 | 0.934 | 0.02 | 0.816761 | 0.66709883 | 22.14994 | 0.085454 | 21.88 |
| 603861 | 2017 | -0.59 | 0.02 | 0.816761 | 0.66709883 | 21.95675 | 0.067237 | 17.6  |
| 2169   | 2017 | -0.07 | 0.02 | 0.816761 | 0.66709883 | 22.16021 | 0.051356 | 19.32 |
| 600098 | 2017 | -0.36 | 0.02 | 0.816761 | 0.66709883 | 24.37521 | 0.046447 | 62.69 |
| 601238 | 2017 | -0.55 | 0.02 | 0.816761 | 0.66709883 | 25.50744 | 0.153694 | 53.65 |
| 2465   | 2017 | 0.942 | 0.02 | 0.816761 | 0.66709883 | 23.19429 | 0.039766 | 21.76 |
| 300521 | 2017 | 0.031 | 0.02 | 0.816761 | 0.66709883 | 20.11844 | 0.074217 | 34.12 |
| 2709   | 2017 | -0.47 | 0.02 | 0.816761 | 0.66709883 | 22.02936 | 0.113892 | 39.93 |
| 600332 | 2017 | 0.466 | 0.02 | 0.816761 | 0.66709883 | 24.06665 | 0.10999  | 45.04 |
| 2572   | 2017 | -0.69 | 0.02 | 0.816761 | 0.66709883 | 22.6777  | 0.184049 | 21.61 |
| 2311   | 2017 | 0.067 | 0.02 | 0.816761 | 0.66709883 | 23.30048 | 0.179388 | 57.81 |
| 2420   | 2017 | -0.73 | 0.02 | 0.816761 | 0.66709883 | 22.14053 | -0.40236 | 25.98 |
| 2311   | 2017 | 0.481 | 0.02 | 0.816761 | 0.66709883 | 23.30048 | 0.179388 | 57.81 |
| 300482 | 2017 | 0.166 | 0.02 | 0.816761 | 0.66709883 | 21.25081 | 0.18914  | 24.55 |
| 2544   | 2017 | 0.387 | 0.02 | 0.816761 | 0.66709883 | 22.25182 | 0.096991 | 31.13 |
| 2683   | 2017 | -0.01 | 0.02 | 0.816761 | 0.66709883 | 22.56982 | 0.055065 | 21.13 |
| 2420   | 2017 | 0.064 | 0.02 | 0.816761 | 0.66709883 | 21.94115 | -0.40236 | 25.98 |
| 300310 | 2017 | -0.45 | 0.02 | 0.816761 | 0.66709883 | 22.23884 | 0.060985 | 7.84  |
| 300310 | 2017 | 0.434 | 0.02 | 0.816761 | 0.66709883 | 22.23884 | 0.060985 | 7.84  |
| 2045   | 2017 | 0.357 | 0.02 | 0.816761 | 0.66709883 | 22.14994 | 0.085454 | 21.88 |
| 300530 | 2017 | 1.207 | 0.02 | 0.816761 | 0.66709883 | 20.10336 | 0.109239 | 60.4  |
| 300530 | 2017 | 1.207 | 0.02 | 0.816761 | 0.66709883 | 20.11232 | 0.109239 | 60.4  |
| 300177 | 2017 | 0.998 | 0.02 | 0.816761 | 0.66709883 | 21.63728 | 0.045559 | 26.16 |
| 300219 | 2017 | -0.26 | 0.02 | 0.816761 | 0.66709883 | 22.32708 | 0.126216 | 23.99 |
| 429    | 2017 | -0.97 | 0.02 | 0.816761 | 0.66709883 | 23.52804 | 0.180897 | 24.55 |
| 2709   | 2017 | 0.41  | 0.02 | 0.816761 | 0.66709883 | 22.02936 | 0.113892 | 39.93 |
| 2177   | 2017 | 1.058 | 0.02 | 0.816761 | 0.66709883 | 21.44712 | 0.008144 | 20.44 |
| 2030   | 2017 | 0.01  | 0.02 | 0.816761 | 0.66709883 | 22.25837 | 0.036386 | 16.63 |
| 601238 | 2017 | -0.55 | 0.02 | 0.816761 | 0.66709883 | 25.50744 | 0.153694 | 53.65 |
| 2732   | 2017 | -0.58 | 0.02 | 0.816761 | 0.66709883 | 21.01238 | 0.128265 | 40.97 |
| 300238 | 2017 | 0.551 | 0.02 | 0.816761 | 0.66709883 | 21.29897 | 0.028605 | 20.76 |
| 600332 | 2017 | -0.86 | 0.02 | 0.816761 | 0.66709883 | 24.06665 | 0.10999  | 45.04 |
| 2152   | 2017 | 0.226 | 0.02 | 0.816761 | 0.66709883 | 23.26418 | 0.101642 | 52.52 |
| 523    | 2017 | -0.35 | 0.02 | 0.816761 | 0.66709883 | 22.29451 | 0.018369 | 30.04 |
| 601238 | 2017 | -0.46 | 0.02 | 0.816761 | 0.66709883 | 25.50744 | 0.153694 | 53.65 |
| 2311   | 2017 | 0.481 | 0.02 | 0.816761 | 0.66709883 | 23.30048 | 0.179388 | 57.81 |
| 600098 | 2017 | -0.58 | 0.02 | 0.816761 | 0.66709883 | 23.69889 | 0.046447 | 62.69 |
| 2084   | 2017 | -0.46 | 0.02 | 0.816761 | 0.66709883 | 21.46399 | 0.057743 | 27.09 |
| 600143 | 2017 | 0.735 | 0.02 | 0.816761 | 0.66709883 | 23.75582 | 0.054897 | 18.79 |
| 2311   | 2017 | 0.137 | 0.02 | 0.816761 | 0.66709883 | 23.30048 | 0.179388 | 57.81 |
| 600332 | 2017 | -0.1  | 0.02 | 0.816761 | 0.66709883 | 24.06665 | 0.10999  | 45.04 |
| 523    | 2017 | -0.37 | 0.02 | 0.816761 | 0.66709883 | 22.29451 | 0.018369 | 30.04 |
| 601238 | 2017 | -0.25 | 0.02 | 0.816761 | 0.66709883 | 25.50744 | 0.153694 | 53.65 |
| 2683   | 2017 | 0.007 | 0.02 | 0.816761 | 0.66709883 | 22.56982 | 0.055065 | 21.13 |
| 600332 | 2017 | -0.23 | 0.02 | 0.816761 | 0.66709883 | 24.06665 | 0.10999  | 45.04 |
| 300335 | 2017 | -0.03 | 0.02 | 0.816761 | 0.66709883 | 21.9381  | 0.169287 | 14.04 |



|        |      |       |      |          |            |          |          |       |
|--------|------|-------|------|----------|------------|----------|----------|-------|
| 600332 | 2017 | -0.2  | 0.02 | 0.816761 | 0.66709883 | 24.06665 | 0.10999  | 45.04 |
| 600894 | 2017 | 0.385 | 0.02 | 0.816761 | 0.66709883 | 22.94235 | 0.059393 | 56.56 |
| 601238 | 2017 | -0.55 | 0.02 | 0.816761 | 0.66709883 | 25.50744 | 0.153694 | 53.65 |
| 300297 | 2017 | 0.78  | 0.02 | 0.816761 | 0.66709883 | 22.83819 | 0.107922 | 15.23 |
| 2030   | 2017 | 0.424 | 0.02 | 0.816761 | 0.66709883 | 22.25837 | 0.036386 | 16.63 |
| 2465   | 2017 | 0.639 | 0.02 | 0.816761 | 0.66709883 | 23.02427 | 0.039766 | 21.76 |
| 300482 | 2017 | -0.2  | 0.02 | 0.816761 | 0.66709883 | 20.97514 | 0.18914  | 24.55 |
| 2663   | 2017 | 0.023 | 0.02 | 0.816761 | 0.66709883 | 23.02447 | 0.033934 | 22.87 |
| 2732   | 2017 | -0.58 | 0.02 | 0.816761 | 0.66709883 | 21.01238 | 0.128265 | 40.97 |
| 300147 | 2017 | 0.863 | 0.02 | 0.816761 | 0.66709883 | 22.94688 | 0.02887  | 34.11 |
| 300238 | 2017 | 0.551 | 0.02 | 0.816761 | 0.66709883 | 21.29897 | 0.028605 | 20.76 |
| 2169   | 2017 | -0.07 | 0.02 | 0.816761 | 0.66709883 | 22.16021 | 0.051356 | 19.32 |
| 2308   | 2017 | -0.35 | 0.02 | 0.816761 | 0.66709883 | 22.18317 | 0.055102 | 33.09 |
| 300030 | 2017 | 0.41  | 0.02 | 0.816761 | 0.66709883 | 21.28052 | 0.008556 | 23.43 |
| 300297 | 2017 | 0.663 | 0.02 | 0.816761 | 0.66709883 | 22.83819 | 0.107922 | 15.23 |
| 2169   | 2017 | 0.737 | 0.02 | 0.816761 | 0.66709883 | 22.16021 | 0.051356 | 19.32 |
| 2833   | 2017 | -0.55 | 0.02 | 0.816761 | 0.66709883 | 20.84915 | 0.246222 | 40.24 |
| 600728 | 2017 | 0.449 | 0.02 | 0.816761 | 0.66709883 | 22.54795 | 0.066329 | 10.34 |
| 601238 | 2017 | -0.55 | 0.02 | 0.816761 | 0.66709883 | 25.50744 | 0.153694 | 53.65 |
| 300177 | 2017 | 0.916 | 0.02 | 0.816761 | 0.66709883 | 21.63728 | 0.045559 | 26.16 |
| 2465   | 2017 | 1.169 | 0.02 | 0.816761 | 0.66709883 | 23.19429 | 0.039766 | 21.76 |
| 603608 | 2017 | -0.88 | 0.02 | 0.816761 | 0.66709883 | 21.76454 | 0.091753 | 21.96 |
| 600894 | 2017 | -0.24 | 0.02 | 0.816761 | 0.66709883 | 22.94235 | 0.059393 | 56.56 |
| 600894 | 2017 | -0.29 | 0.02 | 0.816761 | 0.66709883 | 22.45035 | 0.059393 | 56.56 |
| 2678   | 2017 | -0.41 | 0.02 | 0.816761 | 0.66709883 | 22.15107 | 0.049549 | 74.18 |
| 600098 | 2017 | -0.58 | 0.02 | 0.816761 | 0.66709883 | 24.37521 | 0.046447 | 62.69 |
| 300503 | 2017 | 0.512 | 0.02 | 0.816761 | 0.66709883 | 20.87948 | 0.095977 | 35.82 |
| 2030   | 2017 | 0.01  | 0.02 | 0.816761 | 0.66709883 | 22.25837 | 0.036386 | 16.63 |
| 603002 | 2017 | 0.863 | 0.02 | 0.816761 | 0.66709883 | 21.15551 | 0.07144  | 41.29 |
| 600098 | 2017 | -0.14 | 0.02 | 0.816761 | 0.66709883 | 24.37521 | 0.046447 | 62.69 |
| 523    | 2017 | 0.825 | 0.02 | 0.816761 | 0.66709883 | 22.29451 | 0.018369 | 30.04 |
| 2678   | 2017 | 0.667 | 0.02 | 0.816761 | 0.66709883 | 22.15107 | 0.049549 | 74.18 |
| 539    | 2017 | -0.47 | 0.02 | 0.816761 | 0.66709883 | 24.98605 | 0.038303 | 67.39 |
| 600728 | 2017 | 0.475 | 0.02 | 0.816761 | 0.66709883 | 22.54795 | 0.066329 | 10.34 |
| 300521 | 2017 | 0.457 | 0.02 | 0.816761 | 0.66709883 | 20.11844 | 0.074217 | 34.12 |
| 300030 | 2017 | -0.21 | 0.02 | 0.816761 | 0.66709883 | 21.28052 | 0.008556 | 23.43 |
| 2709   | 2017 | 0.41  | 0.02 | 0.816761 | 0.66709883 | 22.02936 | 0.113892 | 39.93 |
| 2420   | 2017 | -0.73 | 0.02 | 0.816761 | 0.66709883 | 22.14053 | -0.40236 | 25.98 |
| 539    | 2017 | -0.8  | 0.02 | 0.816761 | 0.66709883 | 24.98605 | 0.038303 | 67.39 |
| 2209   | 2017 | 0.222 | 0.02 | 0.816761 | 0.66709883 | 21.22849 | 0.031813 | 19.55 |
| 2465   | 2017 | 1.025 | 0.02 | 0.816761 | 0.66709883 | 23.19429 | 0.039766 | 21.76 |
| 300404 | 2017 | 1.062 | 0.02 | 0.816761 | 0.66709883 | 20.1694  | -0.0646  | 38.51 |
| 2663   | 2017 | 0.087 | 0.02 | 0.816761 | 0.66709883 | 22.93627 | 0.033934 | 22.87 |
| 300177 | 2017 | 1.611 | 0.02 | 0.816761 | 0.66709883 | 21.63728 | 0.045559 | 26.16 |
| 2732   | 2017 | -0.58 | 0.02 | 0.816761 | 0.66709883 | 20.8154  | 0.128265 | 40.97 |
| 2656   | 2017 | 0.087 | 0.02 | 0.816761 | 0.66709883 | 21.94156 | 0.04674  | 28.56 |
| 2465   | 2017 | 0.595 | 0.02 | 0.816761 | 0.66709883 | 23.19429 | 0.039766 | 21.76 |
| 600143 | 2017 | 0.461 | 0.02 | 0.816761 | 0.66709883 | 23.75582 | 0.054897 | 18.79 |
| 2311   | 2017 | 0.481 | 0.02 | 0.816761 | 0.66709883 | 23.30048 | 0.179388 | 57.81 |
| 600894 | 2017 | -0.22 | 0.02 | 0.816761 | 0.66709883 | 22.94235 | 0.059393 | 56.56 |
| 601238 | 2017 | -0.55 | 0.02 | 0.816761 | 0.66709883 | 25.50744 | 0.153694 | 53.65 |
| 600098 | 2017 | -0.32 | 0.02 | 0.816761 | 0.66709883 | 24.37521 | 0.046447 | 62.69 |
| 523    | 2017 | 0.825 | 0.02 | 0.816761 | 0.66709883 | 22.29451 | 0.018369 | 30.04 |
| 2678   | 2017 | -0.41 | 0.02 | 0.816761 | 0.66709883 | 22.15107 | 0.049549 | 74.18 |

|        |      |       |      |          |            |          |          |       |
|--------|------|-------|------|----------|------------|----------|----------|-------|
| 300030 | 2017 | 0.733 | 0.02 | 0.816761 | 0.66709883 | 21.28052 | 0.008556 | 23.43 |
| 300219 | 2017 | -0.05 | 0.02 | 0.816761 | 0.66709883 | 22.32708 | 0.126216 | 23.99 |
| 300147 | 2017 | 0.863 | 0.02 | 0.816761 | 0.66709883 | 22.94688 | 0.02887  | 34.11 |
| 600143 | 2017 | 0.093 | 0.02 | 0.816761 | 0.66709883 | 23.75582 | 0.054897 | 18.79 |
| 2311   | 2017 | 0.481 | 0.02 | 0.816761 | 0.66709883 | 23.30048 | 0.179388 | 57.81 |
| 2311   | 2017 | 0.481 | 0.02 | 0.816761 | 0.66709883 | 23.30048 | 0.179388 | 57.81 |
| 300155 | 2017 | 0.512 | 0.02 | 0.816761 | 0.66709883 | 21.13708 | 0.011853 | 37.38 |
| 603309 | 2017 | 0.265 | 0.02 | 0.816761 | 0.66709883 | 20.70702 | 0.066953 | 37.39 |
| 2152   | 2017 | 0.391 | 0.02 | 0.816761 | 0.66709883 | 23.26418 | 0.101642 | 52.52 |
| 601238 | 2017 | -0.55 | 0.02 | 0.816761 | 0.66709883 | 25.50744 | 0.153694 | 53.65 |
| 2465   | 2017 | 0.942 | 0.02 | 0.816761 | 0.66709883 | 23.19429 | 0.039766 | 21.76 |
| 601238 | 2017 | -0.55 | 0.02 | 0.816761 | 0.66709883 | 25.50744 | 0.153694 | 53.65 |
| 300335 | 2017 | -0.03 | 0.02 | 0.816761 | 0.66709883 | 21.9381  | 0.169287 | 14.04 |
| 2209   | 2017 | 0.92  | 0.02 | 0.816761 | 0.66709883 | 21.21364 | 0.031813 | 19.55 |
| 539    | 2017 | -0.47 | 0.02 | 0.816761 | 0.66709883 | 24.03738 | 0.038303 | 67.39 |
| 2572   | 2017 | -0.56 | 0.02 | 0.816761 | 0.66709883 | 22.6777  | 0.184049 | 21.61 |
| 539    | 2017 | -0.91 | 0.02 | 0.816761 | 0.66709883 | 24.98605 | 0.038303 | 67.39 |
| 300297 | 2017 | 5E-04 | 0.02 | 0.816761 | 0.66709883 | 22.83819 | 0.107922 | 15.23 |
| 601238 | 2017 | -0.55 | 0.02 | 0.816761 | 0.66709883 | 25.50744 | 0.153694 | 53.65 |
| 539    | 2017 | -0.91 | 0.02 | 0.816761 | 0.66709883 | 24.98605 | 0.038303 | 67.39 |
| 600332 | 2017 | -0.1  | 0.02 | 0.816761 | 0.66709883 | 24.06665 | 0.10999  | 45.04 |
| 603898 | 2017 | -0.34 | 0.02 | 0.816761 | 0.66709883 | 21.64527 | 0.169038 | 39.85 |
| 2030   | 2017 | 0.01  | 0.02 | 0.816761 | 0.66709883 | 22.25837 | 0.036386 | 16.63 |
| 2311   | 2017 | 0.481 | 0.02 | 0.816761 | 0.66709883 | 23.30048 | 0.179388 | 57.81 |
| 601238 | 2017 | -0.34 | 0.02 | 0.816761 | 0.66709883 | 25.50744 | 0.153694 | 53.65 |
| 2045   | 2017 | -0.3  | 0.02 | 0.816761 | 0.66709883 | 22.14994 | 0.085454 | 21.88 |
| 2030   | 2017 | 0.01  | 0.02 | 0.816761 | 0.66709883 | 22.25837 | 0.036386 | 16.63 |
| 523    | 2017 | -0.37 | 0.02 | 0.816761 | 0.66709883 | 22.25211 | 0.018369 | 30.04 |
| 600098 | 2017 | -0.14 | 0.02 | 0.816761 | 0.66709883 | 24.37521 | 0.046447 | 62.69 |
| 300530 | 2017 | 1.207 | 0.02 | 0.816761 | 0.66709883 | 20.11232 | 0.109239 | 60.4  |
| 603861 | 2017 | -0.59 | 0.02 | 0.816761 | 0.66709883 | 21.95675 | 0.067237 | 17.6  |
| 300155 | 2017 | 0.276 | 0.02 | 0.816761 | 0.66709883 | 21.13708 | 0.011853 | 37.38 |
| 600332 | 2017 | 0.466 | 0.02 | 0.816761 | 0.66709883 | 24.06665 | 0.10999  | 45.04 |
| 603608 | 2017 | -0.88 | 0.02 | 0.816761 | 0.66709883 | 21.66781 | 0.091753 | 21.96 |
| 300310 | 2017 | -0.45 | 0.02 | 0.816761 | 0.66709883 | 22.23884 | 0.060985 | 7.84  |
| 300335 | 2017 | -0.07 | 0.02 | 0.816761 | 0.66709883 | 21.40621 | 0.169287 | 14.04 |
| 300335 | 2017 | 0.106 | 0.02 | 0.816761 | 0.66709883 | 21.9381  | 0.169287 | 14.04 |
| 2465   | 2017 | 0.942 | 0.02 | 0.816761 | 0.66709883 | 23.19429 | 0.039766 | 21.76 |
| 600143 | 2017 | -0.13 | 0.02 | 0.816761 | 0.66709883 | 23.75582 | 0.054897 | 18.79 |
| 601238 | 2017 | -0.1  | 0.02 | 0.816761 | 0.66709883 | 25.50744 | 0.153694 | 53.65 |
| 2152   | 2017 | 0.303 | 0.02 | 0.816761 | 0.66709883 | 23.26418 | 0.101642 | 52.52 |
| 2030   | 2017 | 0.01  | 0.02 | 0.816761 | 0.66709883 | 22.25837 | 0.036386 | 16.63 |
| 600098 | 2017 | -0.52 | 0.02 | 0.816761 | 0.66709883 | 24.37521 | 0.046447 | 62.69 |
| 600098 | 2017 | -0.25 | 0.02 | 0.816761 | 0.66709883 | 24.37521 | 0.046447 | 62.69 |
| 524    | 2017 | -0.99 | 0.02 | 0.816761 | 0.66709883 | 22.21348 | 0.071849 | 44.41 |
| 601238 | 2017 | -0.55 | 0.02 | 0.816761 | 0.66709883 | 25.50744 | 0.153694 | 53.65 |
| 2030   | 2017 | 0.01  | 0.02 | 0.816761 | 0.66709883 | 22.25837 | 0.036386 | 16.63 |
| 2192   | 2017 | 0.043 | 0.02 | 0.816761 | 0.66709883 | 20.79832 | 0.053512 | 23.65 |
| 2311   | 2017 | 0.481 | 0.02 | 0.816761 | 0.66709883 | 23.30048 | 0.179388 | 57.81 |
| 2420   | 2017 | -0.73 | 0.02 | 0.816761 | 0.66709883 | 22.14053 | -0.40236 | 25.98 |
| 603309 | 2017 | -0.24 | 0.02 | 0.816761 | 0.66709883 | 20.73392 | 0.066953 | 37.39 |
| 600098 | 2017 | -0.58 | 0.02 | 0.816761 | 0.66709883 | 24.37521 | 0.046447 | 62.69 |
| 2683   | 2017 | -0.01 | 0.02 | 0.816761 | 0.66709883 | 22.56982 | 0.055065 | 21.13 |
| 300098 | 2017 | 1.075 | 0.02 | 0.816761 | 0.66709883 | 22.74241 | 0.077624 | 31.58 |

|        |      |       |      |          |            |          |          |       |
|--------|------|-------|------|----------|------------|----------|----------|-------|
| 2544   | 2017 | 0.387 | 0.02 | 0.816761 | 0.66709883 | 22.56838 | 0.096991 | 31.13 |
| 600029 | 2017 | -0.37 | 0.02 | 0.816761 | 0.66709883 | 25.74206 | 0.109917 | 40.04 |
| 2308   | 2017 | -0.35 | 0.02 | 0.816761 | 0.66709883 | 22.0993  | 0.055102 | 33.09 |
| 2400   | 2017 | 0.422 | 0.02 | 0.816761 | 0.66709883 | 23.02897 | -0.01906 | 15.3  |
| 2152   | 2017 | 0.833 | 0.02 | 0.816761 | 0.66709883 | 23.26418 | 0.101642 | 52.52 |
| 603861 | 2017 | -0.19 | 0.02 | 0.816761 | 0.66709883 | 21.95675 | 0.067237 | 17.6  |
| 600685 | 2017 | -0.01 | 0.02 | 0.816761 | 0.66709883 | 24.51103 | 0.008424 | 41.68 |
| 2311   | 2017 | -0.84 | 0.02 | 0.816761 | 0.66709883 | 23.30048 | 0.179388 | 57.81 |
| 300098 | 2017 | 1.264 | 0.02 | 0.816761 | 0.66709883 | 22.74241 | 0.077624 | 31.58 |
| 539    | 2017 | -0.91 | 0.02 | 0.816761 | 0.66709883 | 24.98605 | 0.038303 | 67.39 |
| 600894 | 2017 | 0.078 | 0.02 | 0.816761 | 0.66709883 | 22.94235 | 0.059393 | 56.56 |
| 300482 | 2017 | -0.2  | 0.02 | 0.816761 | 0.66709883 | 21.25081 | 0.18914  | 24.55 |
| 300147 | 2017 | 0.157 | 0.02 | 0.816761 | 0.66709883 | 22.94688 | 0.02887  | 34.11 |
| 300238 | 2017 | 0.612 | 0.02 | 0.816761 | 0.66709883 | 21.29897 | 0.028605 | 20.76 |
| 2030   | 2017 | 0.893 | 0.02 | 0.816761 | 0.66709883 | 22.25837 | 0.036386 | 16.63 |
| 2084   | 2017 | -0.16 | 0.02 | 0.816761 | 0.66709883 | 21.61619 | 0.057743 | 27.09 |
| 603898 | 2017 | -0.28 | 0.02 | 0.816761 | 0.66709883 | 21.64527 | 0.169038 | 39.85 |
| 600143 | 2017 | 0.608 | 0.02 | 0.816761 | 0.66709883 | 23.41351 | 0.054897 | 18.79 |
| 2311   | 2017 | 0.481 | 0.02 | 0.816761 | 0.66709883 | 23.30048 | 0.179388 | 57.81 |
| 601238 | 2017 | 0.777 | 0.02 | 0.816761 | 0.66709883 | 25.50744 | 0.153694 | 53.65 |
| 539    | 2017 | -0.8  | 0.02 | 0.816761 | 0.66709883 | 24.98605 | 0.038303 | 67.39 |
| 603309 | 2017 | 0.644 | 0.02 | 0.816761 | 0.66709883 | 20.73392 | 0.066953 | 37.39 |
| 600685 | 2017 | 0.003 | 0.02 | 0.816761 | 0.66709883 | 24.51103 | 0.008424 | 41.68 |
| 601238 | 2017 | -0.07 | 0.02 | 0.816761 | 0.66709883 | 25.50744 | 0.153694 | 53.65 |
| 600143 | 2017 | -0.04 | 0.02 | 0.816761 | 0.66709883 | 23.75582 | 0.054897 | 18.79 |
| 300177 | 2017 | 0.286 | 0.02 | 0.816761 | 0.66709883 | 21.63728 | 0.045559 | 26.16 |
| 600029 | 2017 | 0.36  | 0.02 | 0.816761 | 0.66709883 | 25.74206 | 0.109917 | 40.04 |
| 601238 | 2017 | -0.55 | 0.02 | 0.816761 | 0.66709883 | 25.50744 | 0.153694 | 53.65 |
| 300098 | 2017 | 0.896 | 0.02 | 0.816761 | 0.66709883 | 22.56113 | 0.077624 | 31.58 |
| 300335 | 2017 | -0.03 | 0.02 | 0.816761 | 0.66709883 | 21.9381  | 0.169287 | 14.04 |
| 600332 | 2017 | 0.068 | 0.02 | 0.816761 | 0.66709883 | 24.06665 | 0.10999  | 45.04 |
| 600143 | 2017 | 0.703 | 0.02 | 0.816761 | 0.66709883 | 23.75582 | 0.054897 | 18.79 |
| 600332 | 2017 | -0.42 | 0.02 | 0.816761 | 0.66709883 | 24.06665 | 0.10999  | 45.04 |
| 300448 | 2017 | 0.004 | 0.02 | 0.816761 | 0.66709883 | 21.02291 | 0.102382 | 36.14 |
| 300098 | 2017 | 1.264 | 0.02 | 0.816761 | 0.66709883 | 22.74241 | 0.077624 | 31.58 |
| 2084   | 2017 | -0.09 | 0.02 | 0.816761 | 0.66709883 | 21.61619 | 0.057743 | 27.09 |
| 300424 | 2017 | 1.431 | 0.02 | 0.816761 | 0.66709883 | 20.92906 | 0.073378 | 21.99 |
| 600098 | 2017 | -0.58 | 0.02 | 0.816761 | 0.66709883 | 24.37521 | 0.046447 | 62.69 |
| 2084   | 2017 | -0.46 | 0.02 | 0.816761 | 0.66709883 | 21.61619 | 0.057743 | 27.09 |
| 2544   | 2017 | -0.28 | 0.02 | 0.816761 | 0.66709883 | 22.56838 | 0.096991 | 31.13 |
| 429    | 2017 | -0.97 | 0.02 | 0.816761 | 0.66709883 | 23.69485 | 0.180897 | 24.55 |
| 300219 | 2017 | -0.24 | 0.02 | 0.816761 | 0.66709883 | 22.32708 | 0.126216 | 23.99 |
| 300219 | 2017 | -0.24 | 0.02 | 0.816761 | 0.66709883 | 22.32708 | 0.126216 | 23.99 |
| 600143 | 2017 | 0.461 | 0.02 | 0.816761 | 0.66709883 | 23.75582 | 0.054897 | 18.79 |
| 600894 | 2017 | -0.6  | 0.02 | 0.816761 | 0.66709883 | 22.94235 | 0.059393 | 56.56 |
| 2311   | 2017 | 0.481 | 0.02 | 0.816761 | 0.66709883 | 23.30048 | 0.179388 | 57.81 |
| 2400   | 2017 | 0.422 | 0.02 | 0.816761 | 0.66709883 | 23.02897 | -0.01906 | 15.3  |
| 300310 | 2017 | 0.345 | 0.02 | 0.816761 | 0.66709883 | 22.23884 | 0.060985 | 7.84  |
| 600098 | 2017 | -0.03 | 0.02 | 0.816761 | 0.66709883 | 24.37521 | 0.046447 | 62.69 |
| 300482 | 2017 | -0.2  | 0.02 | 0.816761 | 0.66709883 | 21.25081 | 0.18914  | 24.55 |
| 603898 | 2017 | -0.08 | 0.02 | 0.816761 | 0.66709883 | 21.64527 | 0.169038 | 39.85 |
| 2192   | 2017 | -0.33 | 0.02 | 0.816761 | 0.66709883 | 20.79832 | 0.053512 | 23.65 |
| 2192   | 2017 | 0.184 | 0.02 | 0.816761 | 0.66709883 | 20.79832 | 0.053512 | 23.65 |
| 300297 | 2017 | 5E-04 | 0.02 | 0.816761 | 0.66709883 | 22.83819 | 0.107922 | 15.23 |

|        |      |       |      |          |            |          |          |       |
|--------|------|-------|------|----------|------------|----------|----------|-------|
| 600728 | 2017 | 0.365 | 0.02 | 0.816761 | 0.66709883 | 22.54795 | 0.066329 | 10.34 |
| 2308   | 2017 | 0.948 | 0.02 | 0.816761 | 0.66709883 | 22.18317 | 0.055102 | 33.09 |
| 600332 | 2017 | 0.024 | 0.02 | 0.816761 | 0.66709883 | 24.06665 | 0.10999  | 45.04 |
| 2311   | 2017 | 0.481 | 0.02 | 0.816761 | 0.66709883 | 23.30048 | 0.179388 | 57.81 |
| 600728 | 2017 | 0.475 | 0.02 | 0.816761 | 0.66709883 | 22.2683  | 0.066329 | 10.34 |
| 300155 | 2017 | 0.535 | 0.02 | 0.816761 | 0.66709883 | 21.13708 | 0.011853 | 37.38 |
| 2030   | 2017 | 0.01  | 0.02 | 0.816761 | 0.66709883 | 22.25837 | 0.036386 | 16.63 |
| 300177 | 2017 | 1.611 | 0.02 | 0.816761 | 0.66709883 | 21.63728 | 0.045559 | 26.16 |
| 2544   | 2017 | 0.432 | 0.02 | 0.816761 | 0.66709883 | 22.56838 | 0.096991 | 31.13 |
| 429    | 2017 | -0.97 | 0.02 | 0.816761 | 0.66709883 | 23.52804 | 0.180897 | 24.55 |
| 2683   | 2017 | -0.01 | 0.02 | 0.816761 | 0.66709883 | 22.56982 | 0.055065 | 21.13 |
| 300098 | 2017 | 1.264 | 0.02 | 0.816761 | 0.66709883 | 22.74241 | 0.077624 | 31.58 |
| 300424 | 2017 | 0.106 | 0.02 | 0.816761 | 0.66709883 | 20.92906 | 0.073378 | 21.99 |
| 300238 | 2017 | -0.38 | 0.02 | 0.816761 | 0.66709883 | 21.29897 | 0.028605 | 20.76 |
| 2656   | 2017 | 0.617 | 0.02 | 0.816761 | 0.66709883 | 21.95395 | 0.04674  | 28.56 |
| 2465   | 2017 | 0.374 | 0.02 | 0.816761 | 0.66709883 | 23.19429 | 0.039766 | 21.76 |
| 2465   | 2017 | 1.257 | 0.02 | 0.816761 | 0.66709883 | 23.19429 | 0.039766 | 21.76 |
| 2663   | 2017 | 0.685 | 0.02 | 0.816761 | 0.66709883 | 23.02447 | 0.033934 | 22.87 |
| 2084   | 2017 | -0.46 | 0.02 | 0.816761 | 0.66709883 | 21.61619 | 0.057743 | 27.09 |
| 300030 | 2017 | 0.228 | 0.02 | 0.816761 | 0.66709883 | 21.28052 | 0.008556 | 23.43 |
| 539    | 2017 | -0.65 | 0.02 | 0.816761 | 0.66709883 | 24.98605 | 0.038303 | 67.39 |
| 2833   | 2017 | -0.55 | 0.02 | 0.816761 | 0.66709883 | 20.84915 | 0.246222 | 40.24 |
| 300482 | 2017 | -0.2  | 0.02 | 0.816761 | 0.66709883 | 21.25081 | 0.18914  | 24.55 |
| 2027   | 2017 | -0.35 | 0.02 | 0.816761 | 0.66709883 | 24.67045 | 0.302158 | 23.34 |
| 300335 | 2017 | -0.14 | 0.02 | 0.816761 | 0.66709883 | 21.9381  | 0.169287 | 14.04 |
| 2311   | 2017 | 0.481 | 0.02 | 0.816761 | 0.66709883 | 23.30048 | 0.179388 | 57.81 |
| 300521 | 2017 | 0.031 | 0.02 | 0.816761 | 0.66709883 | 20.11844 | 0.074217 | 34.12 |
| 300424 | 2017 | 1.431 | 0.02 | 0.816761 | 0.66709883 | 20.92906 | 0.073378 | 21.99 |
| 300177 | 2017 | 1.048 | 0.02 | 0.816761 | 0.66709883 | 21.63728 | 0.045559 | 26.16 |
| 603861 | 2017 | -0.19 | 0.02 | 0.816761 | 0.66709883 | 21.95675 | 0.067237 | 17.6  |
| 2030   | 2017 | 1.335 | 0.02 | 0.816761 | 0.66709883 | 22.25837 | 0.036386 | 16.63 |
| 2311   | 2017 | 0.481 | 0.02 | 0.816761 | 0.66709883 | 23.30048 | 0.179388 | 57.81 |
| 2311   | 2017 | 0.481 | 0.02 | 0.816761 | 0.66709883 | 23.30048 | 0.179388 | 57.81 |
| 601238 | 2017 | -0.55 | 0.02 | 0.816761 | 0.66709883 | 25.50744 | 0.153694 | 53.65 |
| 300030 | 2017 | 0.733 | 0.02 | 0.816761 | 0.66709883 | 21.28052 | 0.008556 | 23.43 |
| 601238 | 2017 | -0.55 | 0.02 | 0.816761 | 0.66709883 | 25.50744 | 0.153694 | 53.65 |
| 300521 | 2017 | 0.031 | 0.02 | 0.816761 | 0.66709883 | 20.1505  | 0.074217 | 34.12 |
| 2084   | 2017 | -0.16 | 0.02 | 0.816761 | 0.66709883 | 21.61619 | 0.057743 | 27.09 |
| 2709   | 2017 | 0.852 | 0.02 | 0.816761 | 0.66709883 | 22.02936 | 0.113892 | 39.93 |
| 600894 | 2017 | -0.14 | 0.02 | 0.816761 | 0.66709883 | 22.94235 | 0.059393 | 56.56 |
| 523    | 2017 | -0.35 | 0.02 | 0.816761 | 0.66709883 | 22.29451 | 0.018369 | 30.04 |
| 601238 | 2017 | -0.55 | 0.02 | 0.816761 | 0.66709883 | 25.50744 | 0.153694 | 53.65 |
| 601238 | 2017 | -0.18 | 0.02 | 0.816761 | 0.66709883 | 25.50744 | 0.153694 | 53.65 |
| 300404 | 2017 | 1.062 | 0.02 | 0.816761 | 0.66709883 | 20.1694  | -0.0646  | 38.51 |
| 300499 | 2017 | 0.292 | 0.02 | 0.816761 | 0.66709883 | 20.80468 | 0.066462 | 20.55 |
| 603861 | 2017 | -0.19 | 0.02 | 0.816761 | 0.66709883 | 21.95675 | 0.067237 | 17.6  |
| 2663   | 2017 | 0.023 | 0.02 | 0.816761 | 0.66709883 | 23.02447 | 0.033934 | 22.87 |
| 300310 | 2017 | -0.45 | 0.02 | 0.816761 | 0.66709883 | 22.08737 | 0.060985 | 7.84  |
| 2663   | 2017 | 0.244 | 0.02 | 0.816761 | 0.66709883 | 23.02447 | 0.033934 | 22.87 |
| 2209   | 2017 | 0.222 | 0.02 | 0.816761 | 0.66709883 | 21.22849 | 0.031813 | 19.55 |
| 300448 | 2017 | 1.034 | 0.02 | 0.816761 | 0.66709883 | 21.02291 | 0.102382 | 36.14 |
| 300448 | 2017 | 1.034 | 0.02 | 0.816761 | 0.66709883 | 20.95151 | 0.102382 | 36.14 |
| 2465   | 2017 | 0.949 | 0.02 | 0.816761 | 0.66709883 | 23.19429 | 0.039766 | 21.76 |
| 300177 | 2017 | 0.816 | 0.02 | 0.816761 | 0.66709883 | 21.29832 | 0.045559 | 26.16 |

|        |      |       |      |          |            |          |          |       |
|--------|------|-------|------|----------|------------|----------|----------|-------|
| 2030   | 2017 | 0.01  | 0.02 | 0.816761 | 0.66709883 | 22.25837 | 0.036386 | 16.63 |
| 300147 | 2017 | -0.46 | 0.02 | 0.816761 | 0.66709883 | 22.94688 | 0.02887  | 34.11 |
| 600098 | 2017 | -0.3  | 0.02 | 0.816761 | 0.66709883 | 24.37521 | 0.046447 | 62.69 |
| 300335 | 2017 | -0.69 | 0.02 | 0.816761 | 0.66709883 | 21.9381  | 0.169287 | 14.04 |
| 601238 | 2017 | -0.55 | 0.02 | 0.816761 | 0.66709883 | 25.50744 | 0.153694 | 53.65 |
| 2544   | 2017 | -0.28 | 0.02 | 0.816761 | 6.67E-01   | 22.56838 | 0.096991 | 31.13 |
| 429    | 2017 | -0.97 | 0.02 | 0.816761 | 6.67E-01   | 23.52804 | 0.180897 | 24.55 |
| 300310 | 2017 | -0.45 | 0.02 | 0.816761 | 6.67E-01   | 22.23884 | 0.060985 | 7.84  |
| 300177 | 2017 | 1.169 | 0.02 | 0.816761 | 6.67E-01   | 21.63728 | 0.045559 | 26.16 |
| 300030 | 2017 | 0.733 | 0.02 | 0.816761 | 6.67E-01   | 21.28052 | 0.008556 | 23.43 |
| 2027   | 2017 | -0.5  | 0.02 | 0.816761 | 6.67E-01   | 23.46762 | 0.302158 | 23.34 |
| 300147 | 2017 | 0.027 | 0.02 | 0.816761 | 6.67E-01   | 22.94688 | 0.02887  | 34.11 |
| 300503 | 2017 | 0.485 | 0.02 | 0.816761 | 6.67E-01   | 20.81763 | 0.095977 | 35.82 |
| 2683   | 2017 | 0.228 | 0.02 | 0.816761 | 6.67E-01   | 22.56982 | 0.055065 | 21.13 |
| 601238 | 2017 | -0.55 | 0.02 | 0.816761 | 6.67E-01   | 25.50744 | 0.153694 | 53.65 |
| 2465   | 2017 | 0.942 | 0.02 | 0.816761 | 6.67E-01   | 23.19429 | 0.039766 | 21.76 |
| 601238 | 2017 | -0.04 | 0.02 | 0.816761 | 6.67E-01   | 25.50744 | 0.153694 | 53.65 |
| 600332 | 2017 | -0.1  | 0.02 | 0.816761 | 0.66709883 | 24.06665 | 0.10999  | 45.04 |
| 2027   | 2017 | -0.35 | 0.02 | 0.816761 | 0.66709883 | 23.46762 | 0.302158 | 23.34 |
| 2027   | 2017 | -0.58 | 0.02 | 0.816761 | 0.66709883 | 23.46762 | 0.302158 | 23.34 |
| 2060   | 2017 | 0.067 | 0.02 | 0.816761 | 0.66709883 | 23.58634 | 0.054652 | 34.53 |
| 2465   | 2017 | 1.699 | 0.02 | 0.816761 | 0.66709883 | 23.19429 | 0.039766 | 21.76 |
| 603002 | 2017 | 0.863 | 0.02 | 0.816761 | 0.66709883 | 21.22481 | 0.07144  | 41.29 |
| 603898 | 2017 | -0.34 | 0.02 | 0.816761 | 0.66709883 | 21.63395 | 0.169038 | 39.85 |
| 300238 | 2017 | 0.281 | 0.02 | 0.816761 | 0.66709883 | 21.29897 | 0.028605 | 20.76 |
| 600894 | 2017 | 0.02  | 0.02 | 0.816761 | 0.66709883 | 22.94235 | 0.059393 | 56.56 |
| 600332 | 2017 | 0.289 | 0.02 | 0.816761 | 0.66709883 | 24.06665 | 0.10999  | 45.04 |
| 600143 | 2017 | 0.705 | 0.02 | 0.816761 | 0.66709883 | 23.75582 | 0.054897 | 18.79 |
| 2678   | 2017 | -0.41 | 0.02 | 0.816761 | 0.66709883 | 22.1821  | 0.049549 | 74.18 |
| 300482 | 2017 | 0.166 | 0.02 | 0.816761 | 0.66709883 | 21.25081 | 0.18914  | 24.55 |
| 603608 | 2017 | -0.76 | 0.02 | 0.816761 | 0.66709883 | 21.76454 | 0.091753 | 21.96 |
| 2152   | 2017 | -0.04 | 0.02 | 0.816761 | 0.66709883 | 23.26418 | 0.101642 | 52.52 |
| 603861 | 2017 | -0.19 | 0.02 | 0.816761 | 0.66709883 | 21.95675 | 0.067237 | 17.6  |
| 2465   | 2017 | 0.374 | 0.02 | 0.816761 | 0.66709883 | 23.19429 | 0.039766 | 21.76 |
| 300424 | 2017 | 0.769 | 0.02 | 0.816761 | 0.66709883 | 20.92906 | 0.073378 | 21.99 |
| 600332 | 2017 | -0.86 | 0.02 | 0.816761 | 0.66709883 | 24.06665 | 0.10999  | 45.04 |
| 2177   | 2017 | 1.563 | 0.02 | 0.816761 | 0.66709883 | 21.44712 | 0.008144 | 20.44 |
| 603002 | 2017 | 0.863 | 0.02 | 0.816761 | 0.66709883 | 21.22481 | 0.07144  | 41.29 |
| 601238 | 2017 | -0.55 | 0.02 | 0.816761 | 0.66709883 | 25.50744 | 0.153694 | 53.65 |
| 603608 | 2017 | -0.22 | 0.02 | 0.816761 | 0.66709883 | 21.76454 | 0.091753 | 21.96 |
| 600143 | 2017 | -0.29 | 0.02 | 0.816761 | 0.66709883 | 23.75582 | 0.054897 | 18.79 |
| 2420   | 2017 | -0.56 | 0.02 | 0.816761 | 0.66709883 | 22.14053 | -0.40236 | 25.98 |
| 603898 | 2017 | -0.08 | 0.02 | 0.816761 | 0.66709883 | 21.64527 | 0.169038 | 39.85 |
| 300155 | 2017 | 0.276 | 0.02 | 0.816761 | 0.66709883 | 21.13708 | 0.011853 | 37.38 |
| 2678   | 2017 | 0.667 | 0.02 | 0.816761 | 0.66709883 | 22.15107 | 0.049549 | 74.18 |
| 2465   | 2017 | 1.025 | 0.02 | 0.816761 | 0.66709883 | 23.19429 | 0.039766 | 21.76 |
| 300147 | 2017 | 0.863 | 0.02 | 0.816761 | 0.66709883 | 22.94688 | 0.02887  | 34.11 |
| 300297 | 2017 | 5E-04 | 0.02 | 0.816761 | 0.66709883 | 22.83819 | 0.107922 | 15.23 |
| 2045   | 2017 | 0.143 | 0.02 | 0.816761 | 0.66709883 | 22.14994 | 0.085454 | 21.88 |
| 601238 | 2017 | -0.04 | 0.02 | 0.816761 | 0.66709883 | 25.50744 | 0.153694 | 53.65 |
| 300521 | 2017 | 0.693 | 0.02 | 0.816761 | 0.66709883 | 20.11844 | 0.074217 | 34.12 |
| 2177   | 2017 | 1.015 | 0.02 | 0.816761 | 0.66709883 | 21.44712 | 0.008144 | 20.44 |
| 600098 | 2017 | 0.741 | 0.02 | 0.816761 | 0.66709883 | 24.37521 | 0.046447 | 62.69 |
| 600029 | 2017 | 0.36  | 0.02 | 0.816761 | 0.66709883 | 25.74206 | 0.109917 | 40.04 |

|        |      |       |      |          |            |          |          |       |
|--------|------|-------|------|----------|------------|----------|----------|-------|
| 2709   | 2017 | 0.852 | 0.02 | 0.816761 | 0.66709883 | 21.63381 | 0.113892 | 39.93 |
| 2209   | 2017 | 0.266 | 0.02 | 0.816761 | 0.66709883 | 21.22849 | 0.031813 | 19.55 |
| 2045   | 2017 | -0.39 | 0.02 | 0.816761 | 0.66709883 | 22.14994 | 0.085454 | 21.88 |
| 603861 | 2017 | -0.18 | 0.02 | 0.816761 | 0.66709883 | 21.95675 | 0.067237 | 17.6  |
| 300482 | 2017 | -0.2  | 0.02 | 0.816761 | 0.66709883 | 21.25081 | 0.18914  | 24.55 |
| 300219 | 2017 | -0.56 | 0.02 | 0.816761 | 0.66709883 | 22.32708 | 0.126216 | 23.99 |
| 300310 | 2017 | -0.45 | 0.02 | 0.816761 | 0.66709883 | 22.23884 | 0.060985 | 7.84  |
| 600685 | 2017 | 0.036 | 0.02 | 0.816761 | 0.66709883 | 24.51103 | 0.008424 | 41.68 |
| 600098 | 2017 | -0.58 | 0.02 | 0.816761 | 0.66709883 | 24.37521 | 0.046447 | 62.69 |
| 2084   | 2017 | -0.14 | 0.02 | 0.816761 | 0.66709883 | 21.61619 | 0.057743 | 27.09 |
| 2045   | 2017 | 0.028 | 0.02 | 0.816761 | 0.66709883 | 21.9765  | 0.085454 | 21.88 |
| 2461   | 2017 | -0.36 | 0.02 | 0.816761 | 0.66709883 | 23.14847 | 0.024779 | 31.98 |
| 300155 | 2017 | 0.276 | 0.02 | 0.816761 | 0.66709883 | 21.13708 | 0.011853 | 37.38 |
| 603861 | 2017 | -0.18 | 0.02 | 0.816761 | 0.66709883 | 21.80608 | 0.067237 | 17.6  |
| 300238 | 2017 | 0.281 | 0.02 | 0.816761 | 0.66709883 | 21.29897 | 0.028605 | 20.76 |
| 300030 | 2017 | 0.155 | 0.02 | 0.816761 | 0.66709883 | 21.28052 | 0.008556 | 23.43 |
| 600143 | 2017 | 0.609 | 0.02 | 0.816761 | 0.66709883 | 23.75582 | 0.054897 | 18.79 |
| 601238 | 2017 | -0.55 | 0.02 | 0.816761 | 0.66709883 | 25.50744 | 0.153694 | 53.65 |
| 600332 | 2017 | 0.466 | 0.02 | 0.816761 | 0.66709883 | 24.06665 | 0.10999  | 45.04 |
| 2572   | 2017 | -0.56 | 0.02 | 0.816761 | 0.66709883 | 22.6777  | 0.184049 | 21.61 |
| 600029 | 2017 | -0.28 | 0.02 | 0.816761 | 0.66709883 | 25.74206 | 0.109917 | 40.04 |
| 600894 | 2017 | -0.6  | 0.02 | 0.816761 | 0.66709883 | 22.94235 | 0.059393 | 56.56 |
| 300297 | 2017 | 1.325 | 0.02 | 0.816761 | 0.66709883 | 22.83819 | 0.107922 | 15.23 |
| 300219 | 2017 | 0.319 | 0.02 | 0.816761 | 0.66709883 | 22.32708 | 0.126216 | 23.99 |
| 600029 | 2017 | 0.195 | 0.02 | 0.816761 | 0.66709883 | 25.74206 | 0.109917 | 40.04 |
| 2045   | 2017 | 0.028 | 0.02 | 0.816761 | 0.66709883 | 22.14994 | 0.085454 | 21.88 |
| 300147 | 2017 | 0.863 | 0.02 | 0.816761 | 0.66709883 | 22.94688 | 0.02887  | 34.11 |
| 2152   | 2017 | -0.49 | 0.02 | 0.816761 | 0.66709883 | 23.26418 | 0.101642 | 52.52 |
| 2683   | 2017 | 0.007 | 0.02 | 0.816761 | 0.66709883 | 22.56982 | 0.055065 | 21.13 |
| 2311   | 2017 | 0.481 | 0.02 | 0.816761 | 0.66709883 | 23.30048 | 0.179388 | 57.81 |
| 300438 | 2017 | 0.354 | 0.02 | 0.816761 | 0.66709883 | 22.02484 | 0.124301 | 31.94 |
| 600332 | 2017 | -0.42 | 0.02 | 0.816761 | 0.66709883 | 24.06665 | 0.10999  | 45.04 |
| 2311   | 2017 | 0.481 | 0.02 | 0.816761 | 0.66709883 | 23.30048 | 0.179388 | 57.81 |
| 2192   | 2017 | 0.184 | 0.02 | 0.816761 | 0.66709883 | 20.79832 | 0.053512 | 23.65 |
| 300238 | 2017 | 0.281 | 0.02 | 0.816761 | 0.66709883 | 21.29897 | 0.028605 | 20.76 |
| 300238 | 2017 | 0.723 | 0.02 | 0.816761 | 0.66709883 | 21.29897 | 0.028605 | 20.76 |
| 600098 | 2017 | -0.58 | 0.02 | 0.816761 | 0.66709883 | 24.37521 | 0.046447 | 62.69 |
| 2030   | 2017 | 0.838 | 0.02 | 0.816761 | 0.66709883 | 21.47958 | 0.036386 | 16.63 |
| 300424 | 2017 | 0.106 | 0.02 | 0.816761 | 0.66709883 | 20.92906 | 0.073378 | 21.99 |
| 300155 | 2017 | 0.535 | 0.02 | 0.816761 | 0.66709883 | 21.17333 | 0.011853 | 37.38 |
| 600685 | 2017 | -0.65 | 0.02 | 0.816761 | 0.66709883 | 24.51103 | 0.008424 | 41.68 |
| 600143 | 2017 | 0.314 | 0.02 | 0.816761 | 0.66709883 | 23.75582 | 0.054897 | 18.79 |
| 300177 | 2017 | 1.611 | 0.02 | 0.816761 | 0.66709883 | 21.63728 | 0.045559 | 26.16 |
| 2411   | 2017 | 0.624 | 0.04 | 0.864374 | 0.74714183 | 23.40328 | 0.096761 | 37.98 |
| 2411   | 2017 | -0.04 | 0.04 | 0.864374 | 0.74714183 | 23.71444 | 0.096761 | 37.98 |
| 2411   | 2017 | 0.624 | 0.04 | 0.864374 | 0.74714183 | 23.71444 | 0.096761 | 37.98 |
| 2411   | 2017 | 0.624 | 0.04 | 0.864374 | 0.74714183 | 23.71444 | 0.096761 | 37.98 |
| 2411   | 2017 | 0.516 | 0.04 | 0.864374 | 0.74714183 | 23.71444 | 0.096761 | 37.98 |
| 2411   | 2017 | 0.624 | 0.04 | 0.864374 | 0.74714183 | 23.71444 | 0.096761 | 37.98 |
| 2411   | 2017 | 0.624 | 0.04 | 0.864374 | 0.74714183 | 23.71444 | 0.096761 | 37.98 |
| 2411   | 2017 | 0.624 | 0.04 | 0.864374 | 0.74714183 | 23.71444 | 0.096761 | 37.98 |
| 2411   | 2017 | -0.04 | 0.04 | 0.864374 | 0.74714183 | 23.71444 | 0.096761 | 37.98 |
| 2411   | 2017 | 0.491 | 0.04 | 0.864374 | 0.74714183 | 23.71444 | 0.096761 | 37.98 |
| 2411   | 2017 | 0.106 | 0.04 | 0.864374 | 0.74714183 | 23.71444 | 0.096761 | 37.98 |

|        |      |       |      |          |            |          |          |       |
|--------|------|-------|------|----------|------------|----------|----------|-------|
| 2411   | 2017 | 0.624 | 0.04 | 0.864374 | 0.74714183 | 23.71444 | 0.096761 | 37.98 |
| 2411   | 2017 | 0.624 | 0.04 | 0.864374 | 0.74714183 | 23.71444 | 0.096761 | 37.98 |
| 2411   | 2017 | 0.624 | 0.04 | 0.864374 | 0.74714183 | 23.71444 | 0.096761 | 37.98 |
| 2411   | 2017 | 0.624 | 0.04 | 0.864374 | 0.74714183 | 23.71444 | 0.096761 | 37.98 |
| 623    | 2017 | -0.75 | 0.07 | 0.04596  | 0.00211236 | 23.80768 | 0.089847 | 26.66 |
| 623    | 2017 | 0.572 | 0.07 | 0.04596  | 0.00211236 | 23.80768 | 0.089847 | 26.66 |
| 623    | 2017 | 0.572 | 0.07 | 0.04596  | 0.00211236 | 23.68821 | 0.089847 | 26.66 |
| 623    | 2017 | 0.572 | 0.07 | 0.04596  | 0.00211236 | 23.80768 | 0.089847 | 26.66 |
| 623    | 2017 | 0.572 | 0.07 | 0.04596  | 0.00211236 | 23.80768 | 0.089847 | 26.66 |
| 623    | 2017 | 0.572 | 0.07 | 0.04596  | 0.00211236 | 23.80768 | 0.089847 | 26.66 |
| 623    | 2017 | 0.572 | 0.07 | 0.04596  | 0.00211236 | 23.80768 | 0.089847 | 26.66 |
| 623    | 2017 | 0.572 | 0.07 | 0.04596  | 0.00211236 | 23.80768 | 0.089847 | 26.66 |
| 623    | 2017 | 0.572 | 0.07 | 0.04596  | 0.00211236 | 23.80768 | 0.089847 | 26.66 |
| 623    | 2017 | -0.6  | 0.07 | 0.04596  | 0.00211236 | 23.80768 | 0.089847 | 26.66 |
| 623    | 2017 | 0.572 | 0.07 | 0.04596  | 0.00211236 | 23.80768 | 0.089847 | 26.66 |
| 623    | 2017 | -0.26 | 0.07 | 0.04596  | 0.00211236 | 23.80768 | 0.089847 | 26.66 |
| 300080 | 2017 | -0.38 | 0.02 | 0.936229 | 0.87652481 | 22.6242  | -0.40379 | 20.02 |
| 300080 | 2017 | -0.09 | 0.02 | 0.936229 | 0.87652481 | 22.6242  | -0.40379 | 20.02 |
| 300080 | 2017 | 0.003 | 0.02 | 0.936229 | 0.87652481 | 22.6242  | -0.40379 | 20.02 |
| 300080 | 2017 | -0.38 | 0.02 | 0.936229 | 0.87652481 | 22.6242  | -0.40379 | 20.02 |
| 300080 | 2017 | -0.38 | 0.02 | 0.936229 | 0.87652481 | 22.6242  | -0.40379 | 20.02 |
| 300080 | 2017 | -0.36 | 0.02 | 0.936229 | 0.87652481 | 22.6242  | -0.40379 | 20.02 |
| 300080 | 2017 | -0.21 | 0.02 | 0.936229 | 0.87652481 | 22.34596 | -0.40379 | 20.02 |
| 300080 | 2017 | -0.38 | 0.02 | 0.936229 | 0.87652481 | 22.6242  | -0.40379 | 20.02 |
| 300080 | 2017 | -0.09 | 0.02 | 0.936229 | 0.87652481 | 22.6242  | -0.40379 | 20.02 |
| 300080 | 2017 | -0.38 | 0.02 | 0.936229 | 0.87652481 | 22.6242  | -0.40379 | 20.02 |
| 300080 | 2017 | -0.38 | 0.02 | 0.936229 | 0.87652481 | 22.6242  | -0.40379 | 20.02 |
| 300080 | 2017 | -0.38 | 0.02 | 0.936229 | 0.87652481 | 22.6242  | -0.40379 | 20.02 |
| 300080 | 2017 | -0.38 | 0.02 | 0.936229 | 0.87652481 | 22.6242  | -0.40379 | 20.02 |
| 300080 | 2017 | -0.38 | 0.02 | 0.936229 | 0.87652481 | 22.6242  | -0.40379 | 20.02 |
| 510    | 2017 | -0.37 | 0.01 | 0.964615 | 0.93048261 | 21.12925 | 0.048257 | 13.05 |
| 300092 | 2017 | 0.061 | 0.01 | 0.964615 | 0.93048261 | 20.38035 | 0.010948 | 17.99 |
| 510    | 2017 | -0.05 | 0.01 | 0.964615 | 0.93048261 | 20.82443 | 0.048257 | 13.05 |
| 300092 | 2017 | 0.061 | 0.01 | 0.964615 | 0.93048261 | 20.36456 | 0.010948 | 17.99 |
| 510    | 2017 | -0.37 | 0.01 | 0.964615 | 0.93048261 | 21.12925 | 0.048257 | 13.05 |
| 600331 | 2017 | 0.121 | 0.01 | 0.964615 | 0.93048261 | 22.97704 | 0.06271  | 26.88 |
| 510    | 2017 | -0.37 | 0.01 | 0.964615 | 0.93048261 | 21.12925 | 0.048257 | 13.05 |
| 600331 | 2017 | -0.41 | 0.01 | 0.964615 | 0.93048261 | 22.97704 | 0.06271  | 26.88 |
| 600331 | 2017 | -0.67 | 0.01 | 0.964615 | 0.93048261 | 22.97704 | 0.06271  | 26.88 |
| 510    | 2017 | -0.37 | 0.01 | 0.964615 | 0.93048261 | 21.12925 | 0.048257 | 13.05 |
| 510    | 2017 | -0.05 | 0.01 | 0.964615 | 0.93048261 | 21.12925 | 0.048257 | 13.05 |
| 300092 | 2017 | 0.061 | 0.01 | 0.964615 | 0.93048261 | 20.36456 | 0.010948 | 17.99 |
| 510    | 2017 | -0.11 | 0.01 | 0.964615 | 0.93048261 | 21.12925 | 0.048257 | 13.05 |
| 510    | 2017 | -0.37 | 0.01 | 0.964615 | 0.93048261 | 21.12925 | 0.048257 | 13.05 |
| 600331 | 2017 | -0.67 | 0.01 | 0.964615 | 0.93048261 | 22.97704 | 0.06271  | 26.88 |
| 600331 | 2017 | -0.67 | 0.01 | 0.964615 | 0.93048261 | 22.97704 | 0.06271  | 26.88 |
| 600331 | 2017 | 0.121 | 0.01 | 0.964615 | 0.93048261 | 22.65863 | 0.06271  | 26.88 |
| 510    | 2017 | -0.37 | 0.01 | 0.964615 | 0.93048261 | 21.12925 | 0.048257 | 13.05 |
| 2360   | 2017 | 0.58  | 0    | 1.108848 | 1.2295433  | 21.12291 | 0.092426 | 21.22 |
| 2360   | 2017 | 0.58  | 0    | 1.108848 | 1.2295433  | 21.08762 | 0.092426 | 21.22 |
| 2360   | 2017 | 0.58  | 0    | 1.108848 | 1.2295433  | 21.12291 | 0.092426 | 21.22 |
| 2155   | 2017 | -0.42 | 0.04 | 1.486448 | 2.209527   | 22.6528  | 0.063255 | 39.91 |
| 2155   | 2017 | -0.52 | 0.04 | 1.486448 | 2.209527   | 22.6528  | 0.063255 | 39.91 |
| 2155   | 2017 | -0.69 | 0.04 | 1.486448 | 2.209527   | 22.6528  | 0.063255 | 39.91 |
| 2155   | 2017 | -0.38 | 0.04 | 1.486448 | 2.209527   | 22.35987 | 0.063255 | 39.91 |

|        |      |       |      |          |            |          |          |       |
|--------|------|-------|------|----------|------------|----------|----------|-------|
| 2155   | 2017 | -0.1  | 0.04 | 1.486448 | 2.209527   | 22.6528  | 0.063255 | 39.91 |
| 2155   | 2017 | -0.42 | 0.04 | 1.486448 | 2.209527   | 22.6528  | 0.063255 | 39.91 |
| 2155   | 2017 | -0.38 | 0.04 | 1.486448 | 2.209527   | 22.6528  | 0.063255 | 39.91 |
| 2155   | 2017 | -0.69 | 0.04 | 1.486448 | 2.209527   | 22.6528  | 0.063255 | 39.91 |
| 2155   | 2017 | -0.42 | 0.04 | 1.486448 | 2.209527   | 22.6528  | 0.063255 | 39.91 |
| 2155   | 2017 | -0.42 | 0.04 | 1.486448 | 2.209527   | 22.6528  | 0.063255 | 39.91 |
| 2155   | 2017 | 0.635 | 0.04 | 1.486448 | 2.209527   | 22.6528  | 0.063255 | 39.91 |
| 2155   | 2017 | -0.42 | 0.04 | 1.486448 | 2.209527   | 22.6528  | 0.063255 | 39.91 |
| 100    | 2017 | 0.417 | 0.02 | 0.104072 | 0.01083092 | 24.75796 | 0.151742 | 7.84  |
| 100    | 2017 | 0.716 | 0.02 | 0.104072 | 0.01083092 | 24.75796 | 0.151742 | 7.84  |
| 2809   | 2017 | 0.699 | 0.02 | 0.104072 | 0.01083092 | 20.90123 | 0.084505 | 45.93 |
| 100    | 2017 | 0.342 | 0.02 | 0.104072 | 0.01083092 | 24.75796 | 0.151742 | 7.84  |
| 300014 | 2017 | -0.2  | 0.02 | 0.104072 | 0.01083092 | 22.73287 | 0.135458 | 37.31 |
| 100    | 2017 | 0.196 | 0.02 | 0.104072 | 0.01083092 | 24.75796 | 0.151742 | 7.84  |
| 100    | 2017 | -0.06 | 0.02 | 0.104072 | 0.01083092 | 24.75796 | 0.151742 | 7.84  |
| 100    | 2017 | -0.23 | 0.02 | 0.104072 | 0.01083092 | 24.75796 | 0.151742 | 7.84  |
| 100    | 2017 | 0.716 | 0.02 | 0.104072 | 0.01083092 | 24.75796 | 0.151742 | 7.84  |
| 100    | 2017 | -0.5  | 0.02 | 0.104072 | 0.01083092 | 24.75796 | 0.151742 | 7.84  |
| 300014 | 2017 | 0.292 | 0.02 | 0.104072 | 0.01083092 | 22.73287 | 0.135458 | 37.31 |
| 300322 | 2017 | 0.496 | 0.02 | 0.104072 | 0.01083092 | 21.42219 | 0.037771 | 28.99 |
| 300526 | 2017 | 0.136 | 0.02 | 0.104072 | 0.01083092 | 20.56399 | 0.082772 | 33.68 |
| 100    | 2017 | -0.25 | 0.02 | 0.104072 | 0.01083092 | 24.75796 | 0.151742 | 7.84  |
| 300014 | 2017 | 0.181 | 0.02 | 0.104072 | 0.01083092 | 22.73287 | 0.135458 | 37.31 |
| 100    | 2017 | 0.053 | 0.02 | 0.104072 | 0.01083092 | 24.75796 | 0.151742 | 7.84  |
| 100    | 2017 | 0.376 | 0.02 | 0.104072 | 0.01083092 | 24.75796 | 0.151742 | 7.84  |
| 100    | 2017 | -0.41 | 0.02 | 0.104072 | 0.01083092 | 24.75796 | 0.151742 | 7.84  |
| 100    | 2017 | -0.19 | 0.02 | 0.104072 | 0.01083092 | 24.75796 | 0.151742 | 7.84  |
| 2579   | 2017 | 0.143 | 0.02 | 0.104072 | 0.01083092 | 21.23068 | 0.02419  | 29.61 |
| 100    | 2017 | 0.342 | 0.02 | 0.104072 | 0.01083092 | 24.75796 | 0.151742 | 7.84  |
| 100    | 2017 | 0.342 | 0.02 | 0.104072 | 0.01083092 | 24.75796 | 0.151742 | 7.84  |
| 100    | 2017 | -0.26 | 0.02 | 0.104072 | 0.01083092 | 24.75796 | 0.151742 | 7.84  |
| 300322 | 2017 | 0.475 | 0.02 | 0.104072 | 0.01083092 | 20.95834 | 0.037771 | 28.99 |
| 2809   | 2017 | 0.699 | 0.02 | 0.104072 | 0.01083092 | 20.94579 | 0.084505 | 45.93 |
| 100    | 2017 | 0.716 | 0.02 | 0.104072 | 0.01083092 | 24.75796 | 0.151742 | 7.84  |
| 300014 | 2017 | 0.788 | 0.02 | 0.104072 | 0.01083092 | 22.38874 | 0.135458 | 37.31 |
| 100    | 2017 | -0.61 | 0.02 | 0.104072 | 0.01083092 | 24.75796 | 0.151742 | 7.84  |
| 300014 | 2017 | 0.954 | 0.02 | 0.104072 | 0.01083092 | 22.73287 | 0.135458 | 37.31 |
| 300322 | 2017 | 0.083 | 0.02 | 0.104072 | 0.01083092 | 21.42219 | 0.037771 | 28.99 |
| 100    | 2017 | -0.06 | 0.02 | 0.104072 | 0.01083092 | 24.75796 | 0.151742 | 7.84  |
| 100    | 2017 | -0.61 | 0.02 | 0.104072 | 0.01083092 | 25.74206 | 0.151742 | 7.84  |
| 100    | 2017 | 0.053 | 0.02 | 0.104072 | 0.01083092 | 24.75796 | 0.151742 | 7.84  |
| 100    | 2017 | -0.12 | 0.02 | 0.104072 | 0.01083092 | 24.75796 | 0.151742 | 7.84  |
| 2579   | 2017 | -0.21 | 0.02 | 0.104072 | 0.01083092 | 21.23068 | 0.02419  | 29.61 |
| 300526 | 2017 | 0.136 | 0.02 | 0.104072 | 0.01083092 | 20.56399 | 0.082772 | 33.68 |
| 2809   | 2017 | 0.699 | 0.02 | 0.104072 | 0.01083092 | 20.94579 | 0.084505 | 45.93 |
| 100    | 2017 | -0.61 | 0.02 | 0.104072 | 0.01083092 | 24.75796 | 0.151742 | 7.84  |
| 100    | 2017 | 0.356 | 0.02 | 0.104072 | 0.01083092 | 24.75796 | 0.151742 | 7.84  |
| 100    | 2017 | 0.716 | 0.02 | 0.104072 | 0.01083092 | 24.75796 | 0.151742 | 7.84  |
| 300526 | 2017 | 0.136 | 0.02 | 0.104072 | 0.01083092 | 20.51144 | 0.082772 | 33.68 |
| 100    | 2017 | 0.386 | 0.02 | 0.104072 | 0.01083092 | 24.75796 | 0.151742 | 7.84  |
| 100    | 2017 | 0.568 | 0.02 | 0.104072 | 0.01083092 | 24.75796 | 0.151742 | 7.84  |
| 100    | 2017 | 0.342 | 0.02 | 0.104072 | 0.01083092 | 24.75796 | 0.151742 | 7.84  |
| 100    | 2017 | -0.61 | 0.02 | 0.104072 | 0.01083092 | 24.75796 | 0.151742 | 7.84  |
| 100    | 2017 | 0.342 | 0.02 | 0.104072 | 0.01083092 | 24.75796 | 0.151742 | 7.84  |



|        |      |       |      |          |            |          |          |       |
|--------|------|-------|------|----------|------------|----------|----------|-------|
| 300322 | 2017 | 0.475 | 0.02 | 0.104072 | 0.01083092 | 21.42219 | 0.037771 | 28.99 |
| 100    | 2017 | -0.34 | 0.02 | 0.104072 | 0.01083092 | 24.75796 | 0.151742 | 7.84  |
| 100    | 2017 | 0.388 | 0.02 | 0.104072 | 0.01083092 | 24.75796 | 0.151742 | 7.84  |
| 300322 | 2017 | 0.019 | 0.02 | 0.104072 | 0.01083092 | 21.42219 | 0.037771 | 28.99 |
| 300014 | 2017 | 0.503 | 0.02 | 0.104072 | 0.01083092 | 22.73287 | 0.135458 | 37.31 |
| 300322 | 2017 | 0.05  | 0.02 | 0.104072 | 0.01083092 | 21.42219 | 0.037771 | 28.99 |
| 100    | 2017 | -0.53 | 0.02 | 0.104072 | 0.01083092 | 24.75796 | 0.151742 | 7.84  |
| 300014 | 2017 | -0.2  | 0.02 | 0.104072 | 0.01083092 | 22.73287 | 0.135458 | 37.31 |
| 100    | 2017 | 0.384 | 0.02 | 0.104072 | 0.01083092 | 24.75796 | 0.151742 | 7.84  |
| 100    | 2017 | -0.61 | 0.02 | 0.104072 | 0.01083092 | 24.75796 | 0.151742 | 7.84  |
| 2809   | 2017 | 0.699 | 0.02 | 0.104072 | 0.01083092 | 20.94579 | 0.084505 | 45.93 |
| 100    | 2017 | 0.384 | 0.02 | 0.104072 | 0.01083092 | 24.75796 | 0.151742 | 7.84  |
| 100    | 2017 | -0.2  | 0.02 | 0.104072 | 0.01083092 | 24.75796 | 0.151742 | 7.84  |
| 100    | 2017 | -0.61 | 0.02 | 0.104072 | 0.01083092 | 24.75796 | 0.151742 | 7.84  |
| 100    | 2017 | 0.568 | 0.02 | 0.104072 | 0.01083092 | 24.75796 | 0.151742 | 7.84  |
| 300322 | 2017 | 0.475 | 0.02 | 0.104072 | 0.01083092 | 21.42219 | 0.037771 | 28.99 |
| 100    | 2017 | -0.31 | 0.02 | 0.104072 | 0.01083092 | 24.75796 | 0.151742 | 7.84  |
| 300322 | 2017 | 0.475 | 0.02 | 0.104072 | 0.01083092 | 21.42219 | 0.037771 | 28.99 |
| 100    | 2017 | 0.044 | 0.02 | 0.104072 | 0.01083092 | 24.75796 | 0.151742 | 7.84  |
| 100    | 2017 | 0.489 | 0.02 | 0.104072 | 0.01083092 | 24.75796 | 0.151742 | 7.84  |
| 300014 | 2017 | 0.503 | 0.02 | 0.104072 | 0.01083092 | 22.73287 | 0.135458 | 37.31 |
| 2579   | 2017 | 0.673 | 0.02 | 0.104072 | 0.01083092 | 21.23068 | 0.02419  | 29.61 |
| 100    | 2017 | 0.342 | 0.02 | 0.104072 | 0.01083092 | 24.75796 | 0.151742 | 7.84  |
| 2809   | 2017 | 0.699 | 0.02 | 0.104072 | 0.01083092 | 20.94579 | 0.084505 | 45.93 |
| 100    | 2017 | 0.342 | 0.02 | 0.104072 | 0.01083092 | 24.75796 | 0.151742 | 7.84  |
| 300322 | 2017 | 0.475 | 0.02 | 0.104072 | 0.01083092 | 21.42219 | 0.037771 | 28.99 |
| 100    | 2017 | -0.23 | 0.02 | 0.104072 | 0.01083092 | 24.75796 | 0.151742 | 7.84  |
| 100    | 2017 | 0.053 | 0.02 | 0.104072 | 0.01083092 | 24.75796 | 0.065469 | 7.84  |
| 100    | 2017 | 0.342 | 0.02 | 0.104072 | 0.01083092 | 24.75796 | 0.151742 | 7.84  |
| 100    | 2017 | 0.436 | 0.02 | 0.104072 | 0.01083092 | 24.75796 | 0.151742 | 7.84  |
| 300526 | 2017 | 0.136 | 0.02 | 0.104072 | 0.01083092 | 20.56399 | 0.082772 | 33.68 |
| 300526 | 2017 | 0.136 | 0.02 | 0.104072 | 0.01083092 | 20.56399 | 0.082772 | 33.68 |
| 100    | 2017 | 0.716 | 0.02 | 0.104072 | 0.01083092 | 24.75796 | 0.151742 | 7.84  |
| 100    | 2017 | 0.342 | 0.02 | 0.104072 | 0.01083092 | 24.75796 | 0.151742 | 7.84  |
| 100    | 2017 | 0.716 | 0.02 | 0.104072 | 0.01083092 | 24.75796 | 0.151742 | 7.84  |
| 100    | 2017 | 0.341 | 0.02 | 0.104072 | 0.01083092 | 24.75796 | 0.151742 | 7.84  |
| 300014 | 2017 | 0.43  | 0.02 | 0.104072 | 0.01083092 | 22.73287 | 0.135458 | 37.31 |
| 100    | 2017 | 0.444 | 0.02 | 0.104072 | 0.01083092 | 24.75796 | 0.151742 | 7.84  |
| 2579   | 2017 | 0.673 | 0.02 | 0.104072 | 0.01083092 | 21.23068 | 0.02419  | 29.61 |
| 2579   | 2017 | -0.21 | 0.02 | 0.104072 | 0.01083092 | 20.71164 | 0.02419  | 29.61 |
| 100    | 2017 | 0.174 | 0.02 | 0.104072 | 0.01083092 | 24.75796 | 0.151742 | 7.84  |
| 100    | 2017 | 0.526 | 0.02 | 0.104072 | 0.01083092 | 24.75796 | 0.151742 | 7.84  |
| 100    | 2017 | -0.34 | 0.02 | 0.104072 | 0.01083092 | 24.75796 | 0.151742 | 7.84  |
| 100    | 2017 | 0.262 | 0.02 | 0.104072 | 0.01083092 | 24.75796 | 0.151742 | 7.84  |
| 100    | 2017 | 0.342 | 0.02 | 0.104072 | 0.01083092 | 24.75796 | 0.151742 | 7.84  |
| 300014 | 2017 | 0.712 | 0.02 | 0.104072 | 0.01083092 | 22.73287 | 0.135458 | 37.31 |
| 100    | 2017 | 0.716 | 0.02 | 0.104072 | 0.01083092 | 24.75796 | 0.151742 | 7.84  |
| 100    | 2017 | -0.61 | 0.02 | 0.104072 | 0.01083092 | 24.75796 | 0.151742 | 7.84  |
| 2422   | 2017 | -0.42 | 0.01 | 0.87807  | 0.77100608 | 24.05505 | 0.067689 | 26.33 |
| 2190   | 2017 | -0.19 | 0.01 | 0.87807  | 0.77100608 | 22.94262 | -0.06214 | 51.33 |
| 300362 | 2017 | 0.024 | 0.01 | 0.87807  | 0.77100608 | 22.23192 | 0.03781  | 30.43 |
| 300414 | 2017 | 0.245 | 0.01 | 0.87807  | 0.77100608 | 20.6899  | 0.044622 | 40.72 |
| 300559 | 2017 | 1.532 | 0.01 | 0.87807  | 0.77100608 | 20.44563 | 0.112387 | 34.08 |
| 300471 | 2017 | 0.164 | 0.01 | 0.87807  | 0.77100608 | 21.77616 | 0.017204 | 32.29 |

|        |      |       |      |         |            |          |          |       |
|--------|------|-------|------|---------|------------|----------|----------|-------|
| 300127 | 2017 | -0.06 | 0.01 | 0.87807 | 0.77100608 | 20.97902 | 0.159187 | 32.2  |
| 300434 | 2017 | -0.17 | 0.01 | 0.87807 | 0.77100608 | 21.86387 | 0.045709 | 16.63 |
| 600875 | 2017 | -0.21 | 0.01 | 0.87807 | 0.77100608 | 25.09171 | 0.030001 | 41.68 |
| 600392 | 2017 | -0.72 | 0.01 | 0.87807 | 0.77100608 | 22.84566 | 0.060691 | 14.04 |
| 2539   | 2017 | -0.33 | 0.01 | 0.87807 | 0.77100608 | 22.95331 | 0.032443 | 38.94 |
| 2190   | 2017 | 0.265 | 0.01 | 0.87807 | 0.77100608 | 22.94262 | -0.06214 | 51.33 |
| 300101 | 2017 | 1.577 | 0.01 | 0.87807 | 0.77100608 | 20.57787 | 0.044041 | 29.83 |
| 790    | 2017 | -0.39 | 0.01 | 0.87807 | 0.77100608 | 21.00548 | 0.204642 | 18.08 |
| 300425 | 2017 | 0.064 | 0.01 | 0.87807 | 0.77100608 | 21.68253 | 0.061874 | 40.81 |
| 600674 | 2017 | 0.27  | 0.01 | 0.87807 | 0.77100608 | 24.09144 | 0.144054 | 50.66 |
| 600353 | 2017 | -0.68 | 0.01 | 0.87807 | 0.77100608 | 21.2754  | 0.036011 | 27.91 |
| 600438 | 2017 | -0.26 | 0.01 | 0.87807 | 0.77100608 | 23.96384 | 0.148954 | 52.45 |
| 300425 | 2017 | -0.29 | 0.01 | 0.87807 | 0.77100608 | 21.68253 | 0.061874 | 40.81 |
| 2023   | 2017 | 0.936 | 0.01 | 0.87807 | 0.77100608 | 22.28753 | 0.004662 | 17.18 |
| 600438 | 2017 | -0.26 | 0.01 | 0.87807 | 0.77100608 | 23.96384 | 0.148954 | 52.45 |
| 300471 | 2017 | 0.019 | 0.01 | 0.87807 | 0.77100608 | 21.77616 | 0.017204 | 32.29 |
| 600875 | 2017 | 0.027 | 0.01 | 0.87807 | 0.77100608 | 25.09171 | 0.030001 | 41.68 |
| 598    | 2017 | -0.9  | 0.01 | 0.87807 | 0.77100608 | 23.06744 | 0.089957 | 42.1  |
| 600438 | 2017 | -0.26 | 0.01 | 0.87807 | 0.77100608 | 23.96384 | 0.148954 | 52.45 |
| 300467 | 2017 | 0.847 | 0.01 | 0.87807 | 0.77100608 | 22.00074 | 0.033447 | 9.84  |
| 2422   | 2017 | 0.245 | 0.01 | 0.87807 | 0.77100608 | 24.05505 | 0.067689 | 26.33 |
| 2253   | 2017 | 2.47  | 0.01 | 0.87807 | 0.77100608 | 21.14715 | 0.036095 | 8.01  |
| 600779 | 2017 | -0.05 | 0.01 | 0.87807 | 0.77100608 | 21.74891 | 0.212296 | 39.71 |
| 600391 | 2017 | 0.562 | 0.01 | 0.87807 | 0.77100608 | 22.48414 | 0.030421 | 36.02 |
| 600438 | 2017 | -0.33 | 0.01 | 0.87807 | 0.77100608 | 23.96384 | 0.148954 | 52.45 |
| 300540 | 2017 | 0.346 | 0.01 | 0.87807 | 0.77100608 | 20.63271 | 0.031543 | 13.39 |
| 300463 | 2017 | 0.744 | 0.01 | 0.87807 | 0.77100608 | 21.99952 | 0.156309 | 12.2  |
| 600438 | 2017 | 0.549 | 0.01 | 0.87807 | 0.77100608 | 23.96384 | 0.148954 | 52.45 |
| 600392 | 2017 | -0.31 | 0.01 | 0.87807 | 0.77100608 | 22.84566 | 0.060691 | 14.04 |
| 300535 | 2017 | 0.89  | 0.01 | 0.87807 | 0.77100608 | 20.40181 | 0.078088 | 23.13 |
| 2422   | 2017 | 0.907 | 0.01 | 0.87807 | 0.77100608 | 24.05505 | 0.067689 | 26.33 |
| 300471 | 2017 | -0.06 | 0.01 | 0.87807 | 0.77100608 | 21.77616 | 0.017204 | 32.29 |
| 2422   | 2017 | -0.42 | 0.01 | 0.87807 | 0.77100608 | 23.9169  | 0.067689 | 26.33 |
| 600438 | 2017 | -0.26 | 0.01 | 0.87807 | 0.77100608 | 23.96384 | 0.148954 | 52.45 |
| 600438 | 2017 | -0.26 | 0.01 | 0.87807 | 0.77100608 | 23.96384 | 0.148954 | 52.45 |
| 300249 | 2017 | -0.5  | 0.01 | 0.87807 | 0.77100608 | 21.64103 | 0.09145  | 17.6  |
| 601811 | 2017 | 0.361 | 0.01 | 0.87807 | 0.77100608 | 23.23178 | 0.115182 | 49.11 |
| 600875 | 2017 | -0.37 | 0.01 | 0.87807 | 0.77100608 | 25.09171 | 0.030001 | 41.68 |
| 600353 | 2017 | -0.68 | 0.01 | 0.87807 | 0.77100608 | 20.93227 | 0.036011 | 27.91 |
| 600438 | 2017 | -0.61 | 0.01 | 0.87807 | 0.77100608 | 23.96384 | 0.148954 | 52.45 |
| 600875 | 2017 | 0.328 | 0.01 | 0.87807 | 0.77100608 | 25.09171 | 0.030001 | 41.68 |
| 300425 | 2017 | -0.31 | 0.01 | 0.87807 | 0.77100608 | 21.68253 | 0.061874 | 40.81 |
| 2268   | 2017 | 1.468 | 0.01 | 0.87807 | 0.77100608 | 22.47309 | 0.040397 | 37.79 |
| 601811 | 2017 | 0.361 | 0.01 | 0.87807 | 0.77100608 | 23.26768 | 0.115182 | 49.11 |
| 2539   | 2017 | -0.95 | 0.01 | 0.87807 | 0.77100608 | 22.95331 | 0.032443 | 38.94 |
| 2480   | 2017 | 0.068 | 0.01 | 0.87807 | 0.77100608 | 22.44364 | 0.007609 | 22.98 |
| 600392 | 2017 | -0.31 | 0.01 | 0.87807 | 0.77100608 | 22.84566 | 0.060691 | 14.04 |
| 600875 | 2017 | -0.41 | 0.01 | 0.87807 | 0.77100608 | 25.09171 | 0.030001 | 41.68 |
| 2539   | 2017 | -0.95 | 0.01 | 0.87807 | 0.77100608 | 22.95331 | 0.032443 | 38.94 |
| 600466 | 2017 | -0.67 | 0.01 | 0.87807 | 0.77100608 | 25.27967 | 0.065668 | 53.62 |
| 300471 | 2017 | -0.19 | 0.01 | 0.87807 | 0.77100608 | 21.77616 | 0.017204 | 32.29 |
| 600779 | 2017 | -0.05 | 0.01 | 0.87807 | 0.77100608 | 21.74891 | 0.212296 | 39.71 |
| 300019 | 2017 | 0.832 | 0.01 | 0.87807 | 0.77100608 | 20.70081 | 0.068925 | 17.8  |
| 300019 | 2017 | 0.755 | 0.01 | 0.87807 | 0.77100608 | 20.40734 | 0.068925 | 17.8  |

|        |      |       |      |         |            |          |          |       |
|--------|------|-------|------|---------|------------|----------|----------|-------|
| 300467 | 2017 | 1.509 | 0.01 | 0.87807 | 0.77100608 | 21.97972 | 0.033447 | 9.84  |
| 300502 | 2017 | -0.5  | 0.01 | 0.87807 | 0.77100608 | 21.10142 | 0.102133 | 13.8  |
| 600391 | 2017 | 0.562 | 0.01 | 0.87807 | 0.77100608 | 22.48414 | 0.030421 | 36.02 |
| 300366 | 2017 | 1.338 | 0.01 | 0.87807 | 0.77100608 | 22.03765 | 0.058268 | 25.78 |
| 600875 | 2017 | 0.027 | 0.01 | 0.87807 | 0.77100608 | 25.09171 | 0.030001 | 41.68 |
| 300019 | 2017 | 0.832 | 0.01 | 0.87807 | 0.77100608 | 20.70081 | 0.068925 | 17.8  |
| 300414 | 2017 | 0.245 | 0.01 | 0.87807 | 0.77100608 | 20.6899  | 0.044622 | 40.72 |
| 2651   | 2017 | 0.35  | 0.01 | 0.87807 | 0.77100608 | 21.62447 | 0.065092 | 35.12 |
| 600391 | 2017 | 0.562 | 0.01 | 0.87807 | 0.77100608 | 22.48414 | 0.030421 | 36.02 |
| 2422   | 2017 | 0.112 | 0.01 | 0.87807 | 0.77100608 | 24.05505 | 0.067689 | 26.33 |
| 600875 | 2017 | -0.64 | 0.01 | 0.87807 | 0.77100608 | 25.09171 | 0.030001 | 41.68 |
| 2268   | 2017 | 1.569 | 0.01 | 0.87807 | 0.77100608 | 22.47309 | 0.040397 | 37.79 |
| 600875 | 2017 | 0.689 | 0.01 | 0.87807 | 0.77100608 | 25.09171 | 0.030001 | 41.68 |
| 300249 | 2017 | -0.5  | 0.01 | 0.87807 | 0.77100608 | 21.64103 | 0.09145  | 17.6  |
| 300440 | 2017 | 1.651 | 0.01 | 0.87807 | 0.77100608 | 21.32421 | 0.093551 | 50.47 |
| 300470 | 2017 | -0.49 | 0.01 | 0.87807 | 0.77100608 | 20.91375 | 0.121464 | 27.76 |
| 2773   | 2017 | -0.2  | 0.01 | 0.87807 | 0.77100608 | 22.24631 | 0.1818   | 33.28 |
| 300434 | 2017 | -0.17 | 0.01 | 0.87807 | 0.77100608 | 21.86387 | 0.045709 | 16.63 |
| 300028 | 2017 | 0.768 | 0.01 | 0.87807 | 0.77100608 | 20.10336 | -0.4336  | 27.98 |
| 600438 | 2017 | -0.26 | 0.01 | 0.87807 | 0.77100608 | 23.96384 | 0.148954 | 52.45 |
| 2190   | 2017 | 0.418 | 0.01 | 0.87807 | 0.77100608 | 21.44265 | -0.06214 | 51.33 |
| 2268   | 2017 | 1.569 | 0.01 | 0.87807 | 0.77100608 | 22.47309 | 0.040397 | 37.79 |
| 600378 | 2017 | 0.211 | 0.01 | 0.87807 | 0.77100608 | 20.77913 | 0.074021 | 23.82 |
| 300502 | 2017 | -0.5  | 0.01 | 0.87807 | 0.77100608 | 21.06142 | 0.102133 | 13.8  |
| 600466 | 2017 | -0.67 | 0.01 | 0.87807 | 0.77100608 | 25.27967 | 0.065668 | 53.62 |
| 300467 | 2017 | 2.172 | 0.01 | 0.87807 | 0.77100608 | 22.00074 | 0.033447 | 9.84  |
| 2422   | 2017 | -0.42 | 0.01 | 0.87807 | 0.77100608 | 24.05505 | 0.067689 | 26.33 |
| 2422   | 2017 | 0.157 | 0.01 | 0.87807 | 0.77100608 | 24.05505 | 0.067689 | 26.33 |
| 600466 | 2017 | -0.67 | 0.01 | 0.87807 | 0.77100608 | 25.27967 | 0.065668 | 53.62 |
| 300028 | 2017 | 2.093 | 0.01 | 0.87807 | 0.77100608 | 20.10336 | -0.4336  | 27.98 |
| 2422   | 2017 | -0.01 | 0.01 | 0.87807 | 0.77100608 | 24.05505 | 0.067689 | 26.33 |
| 300366 | 2017 | 0.896 | 0.01 | 0.87807 | 0.77100608 | 22.03765 | 0.058268 | 25.78 |
| 598    | 2017 | -0.9  | 0.01 | 0.87807 | 0.77100608 | 23.06744 | 0.089957 | 42.1  |
| 300471 | 2017 | -0.35 | 0.01 | 0.87807 | 0.77100608 | 21.77616 | 0.017204 | 32.29 |
| 2539   | 2017 | -0.95 | 0.01 | 0.87807 | 0.77100608 | 22.95331 | 0.032443 | 38.94 |
| 300362 | 2017 | 0.024 | 0.01 | 0.87807 | 0.77100608 | 22.37522 | 0.03781  | 30.43 |
| 600353 | 2017 | -0.54 | 0.01 | 0.87807 | 0.77100608 | 21.2754  | 0.036011 | 27.91 |
| 300535 | 2017 | 0.89  | 0.01 | 0.87807 | 0.77100608 | 20.40181 | 0.078088 | 23.13 |
| 600466 | 2017 | -0.94 | 0.01 | 0.87807 | 0.77100608 | 25.27967 | 0.065668 | 53.62 |
| 2777   | 2017 | 1.083 | 0.01 | 0.87807 | 0.77100608 | 20.98379 | 0.183072 | 28.35 |
| 2480   | 2017 | 0.13  | 0.01 | 0.87807 | 0.77100608 | 22.44364 | 0.007609 | 22.98 |
| 598    | 2017 | -0.61 | 0.01 | 0.87807 | 0.77100608 | 23.06744 | 0.089957 | 42.1  |
| 2422   | 2017 | -0.09 | 0.01 | 0.87807 | 0.77100608 | 24.05505 | 0.067689 | 26.33 |
| 300463 | 2017 | 0.934 | 0.01 | 0.87807 | 0.77100608 | 21.99952 | 0.156309 | 12.2  |
| 600875 | 2017 | 0.328 | 0.01 | 0.87807 | 0.77100608 | 25.09171 | 0.030001 | 41.68 |
| 600438 | 2017 | -0.58 | 0.01 | 0.87807 | 0.77100608 | 23.96384 | 0.148954 | 52.45 |
| 300425 | 2017 | -0.23 | 0.01 | 0.87807 | 0.77100608 | 21.68253 | 0.061874 | 40.81 |
| 600438 | 2017 | -0.26 | 0.01 | 0.87807 | 0.77100608 | 23.96384 | 0.148954 | 52.45 |
| 2539   | 2017 | -0.95 | 0.01 | 0.87807 | 0.77100608 | 22.95331 | 0.032443 | 38.94 |
| 2253   | 2017 | 1.145 | 0.01 | 0.87807 | 0.77100608 | 21.14715 | 0.036095 | 8.01  |
| 2268   | 2017 | 1.569 | 0.01 | 0.87807 | 0.77100608 | 22.47309 | 0.040397 | 37.79 |
| 2023   | 2017 | 1.443 | 0.01 | 0.87807 | 0.77100608 | 22.28753 | 0.004662 | 17.18 |
| 586    | 2017 | -0.67 | 0.01 | 0.87807 | 0.77100608 | 20.14466 | 0.003603 | 20.68 |
| 2422   | 2017 | 0.245 | 0.01 | 0.87807 | 0.77100608 | 24.05505 | 0.067689 | 26.33 |

|        |      |       |      |         |            |          |          |       |
|--------|------|-------|------|---------|------------|----------|----------|-------|
| 600875 | 2017 | -0.05 | 0.01 | 0.87807 | 0.77100608 | 25.09171 | 0.030001 | 41.68 |
| 300470 | 2017 | -0.05 | 0.01 | 0.87807 | 0.77100608 | 20.87152 | 0.121464 | 27.76 |
| 2773   | 2017 | -0.01 | 0.01 | 0.87807 | 0.77100608 | 22.24631 | 0.1818   | 33.28 |
| 600378 | 2017 | 0.211 | 0.01 | 0.87807 | 0.77100608 | 20.77913 | 0.074021 | 23.82 |
| 600392 | 2017 | 0.6   | 0.01 | 0.87807 | 0.77100608 | 22.84566 | 0.060691 | 14.04 |
| 300249 | 2017 | -0.09 | 0.01 | 0.87807 | 0.77100608 | 21.64103 | 0.09145  | 17.6  |
| 300362 | 2017 | 0.024 | 0.01 | 0.87807 | 0.77100608 | 22.37522 | 0.03781  | 30.43 |
| 2480   | 2017 | 0.074 | 0.01 | 0.87807 | 0.77100608 | 22.44364 | 0.007609 | 22.98 |
| 300249 | 2017 | -0.5  | 0.01 | 0.87807 | 0.77100608 | 21.03581 | 0.09145  | 17.6  |
| 300467 | 2017 | 2.172 | 0.01 | 0.87807 | 0.77100608 | 22.00074 | 0.033447 | 9.84  |
| 2539   | 2017 | -0.35 | 0.01 | 0.87807 | 0.77100608 | 22.95331 | 0.032443 | 38.94 |
| 300471 | 2017 | -0.28 | 0.01 | 0.87807 | 0.77100608 | 21.52629 | 0.017204 | 32.29 |
| 300249 | 2017 | -0.09 | 0.01 | 0.87807 | 0.77100608 | 21.64103 | 0.09145  | 17.6  |
| 300028 | 2017 | 0.768 | 0.01 | 0.87807 | 0.77100608 | 20.10336 | -0.4336  | 27.98 |
| 2023   | 2017 | 0.715 | 0.01 | 0.87807 | 0.77100608 | 22.28753 | 0.004662 | 17.18 |
| 600466 | 2017 | -0.67 | 0.01 | 0.87807 | 0.77100608 | 25.27967 | 0.065668 | 53.62 |
| 300101 | 2017 | 1.541 | 0.01 | 0.87807 | 0.77100608 | 20.96795 | 0.044041 | 29.83 |
| 2023   | 2017 | 1.152 | 0.01 | 0.87807 | 0.77100608 | 22.28753 | 0.004662 | 17.18 |
| 600392 | 2017 | -0.31 | 0.01 | 0.87807 | 0.77100608 | 22.84566 | 0.060691 | 14.04 |
| 600875 | 2017 | -0.64 | 0.01 | 0.87807 | 0.77100608 | 25.09171 | 0.030001 | 41.68 |
| 300559 | 2017 | 1.532 | 0.01 | 0.87807 | 0.77100608 | 20.44563 | 0.112387 | 34.08 |
| 300249 | 2017 | -0.5  | 0.01 | 0.87807 | 0.77100608 | 21.64103 | 0.09145  | 17.6  |
| 600674 | 2017 | -0    | 0.01 | 0.87807 | 0.77100608 | 24.09144 | 0.144054 | 50.66 |
| 790    | 2017 | -0.39 | 0.01 | 0.87807 | 0.77100608 | 21.00548 | 0.204642 | 18.08 |
| 300470 | 2017 | 0.307 | 0.01 | 0.87807 | 0.77100608 | 20.91375 | 0.121464 | 27.76 |
| 2480   | 2017 | 0.56  | 0.01 | 0.87807 | 0.77100608 | 22.44364 | 0.007609 | 22.98 |
| 300470 | 2017 | -0.49 | 0.01 | 0.87807 | 0.77100608 | 20.91375 | 0.121464 | 27.76 |
| 300425 | 2017 | -0.29 | 0.01 | 0.87807 | 0.77100608 | 21.33086 | 0.061874 | 40.81 |
| 600438 | 2017 | 0.549 | 0.01 | 0.87807 | 0.77100608 | 23.96384 | 0.148954 | 52.45 |
| 2023   | 2017 | 0.826 | 0.01 | 0.87807 | 0.77100608 | 22.28753 | 0.004662 | 17.18 |
| 600392 | 2017 | -0.31 | 0.01 | 0.87807 | 0.77100608 | 22.84566 | 0.060691 | 14.04 |
| 2480   | 2017 | 0.272 | 0.01 | 0.87807 | 0.77100608 | 22.44364 | 0.007609 | 22.98 |
| 600392 | 2017 | -0.31 | 0.01 | 0.87807 | 0.77100608 | 22.84566 | 0.060691 | 14.04 |
| 600466 | 2017 | -0.67 | 0.01 | 0.87807 | 0.77100608 | 24.09759 | 0.065668 | 53.62 |
| 2480   | 2017 | 0.078 | 0.01 | 0.87807 | 0.77100608 | 22.44364 | 0.007609 | 22.98 |
| 300425 | 2017 | -0.29 | 0.01 | 0.87807 | 0.77100608 | 21.68253 | 0.061874 | 40.81 |
| 300440 | 2017 | 0.835 | 0.01 | 0.87807 | 0.77100608 | 21.32421 | 0.093551 | 50.47 |
| 600438 | 2017 | 0.27  | 0.01 | 0.87807 | 0.77100608 | 23.96384 | 0.148954 | 52.45 |
| 2253   | 2017 | 1.807 | 0.01 | 0.87807 | 0.77100608 | 21.14715 | 0.036095 | 8.01  |
| 300471 | 2017 | -0.28 | 0.01 | 0.87807 | 0.77100608 | 21.77616 | 0.017204 | 32.29 |
| 300425 | 2017 | -0.31 | 0.01 | 0.87807 | 0.77100608 | 21.68253 | 0.061874 | 40.81 |
| 2422   | 2017 | 0.245 | 0.01 | 0.87807 | 0.77100608 | 24.05505 | 0.067689 | 26.33 |
| 2539   | 2017 | -0.95 | 0.01 | 0.87807 | 0.77100608 | 22.95331 | 0.032443 | 38.94 |
| 2023   | 2017 | 0.494 | 0.01 | 0.87807 | 0.77100608 | 22.28753 | 0.004662 | 17.18 |
| 300440 | 2017 | 0.835 | 0.01 | 0.87807 | 0.77100608 | 21.32421 | 0.093551 | 50.47 |
| 600875 | 2017 | -0.15 | 0.01 | 0.87807 | 0.77100608 | 25.09171 | 0.030001 | 41.68 |
| 300463 | 2017 | 0.438 | 0.01 | 0.87807 | 0.77100608 | 21.99952 | 0.156309 | 12.2  |
| 300019 | 2017 | 0.782 | 0.01 | 0.87807 | 0.77100608 | 20.70081 | 0.068925 | 17.8  |
| 2539   | 2017 | -0.73 | 0.01 | 0.87807 | 0.77100608 | 22.95331 | 0.032443 | 38.94 |
| 2539   | 2017 | -0.95 | 0.01 | 0.87807 | 0.77100608 | 22.95331 | 0.032443 | 38.94 |
| 2539   | 2017 | 0.378 | 0.01 | 0.87807 | 0.77100608 | 22.95331 | 0.032443 | 38.94 |
| 2539   | 2017 | -0.95 | 0.01 | 0.87807 | 0.77100608 | 22.6328  | 0.032443 | 38.94 |
| 600875 | 2017 | -0.19 | 0.01 | 0.87807 | 0.77100608 | 25.09171 | 0.030001 | 41.68 |
| 300467 | 2017 | 0.847 | 0.01 | 0.87807 | 0.77100608 | 22.00074 | 0.033447 | 9.84  |

|        |      |       |      |         |            |          |          |       |
|--------|------|-------|------|---------|------------|----------|----------|-------|
| 2422   | 2017 | 0.819 | 0.01 | 0.87807 | 0.77100608 | 24.05505 | 0.067689 | 26.33 |
| 300362 | 2017 | 0.024 | 0.01 | 0.87807 | 0.77100608 | 22.37522 | 0.03781  | 30.43 |
| 300249 | 2017 | -0.21 | 0.01 | 0.87807 | 0.77100608 | 21.64103 | 0.09145  | 17.6  |
| 300540 | 2017 | 0.242 | 0.01 | 0.87807 | 0.77100608 | 20.68516 | 0.031543 | 13.39 |
| 2539   | 2017 | -0.19 | 0.01 | 0.87807 | 0.77100608 | 22.95331 | 0.032443 | 38.94 |
| 300540 | 2017 | -0.08 | 0.01 | 0.87807 | 0.77100608 | 20.68516 | 0.031543 | 13.39 |
| 2023   | 2017 | 0.494 | 0.01 | 0.87807 | 0.77100608 | 22.28753 | 0.004662 | 17.18 |
| 300019 | 2017 | 0.832 | 0.01 | 0.87807 | 0.77100608 | 20.70081 | 0.068925 | 17.8  |
| 600438 | 2017 | 0.052 | 0.01 | 0.87807 | 0.77100608 | 23.96384 | 0.148954 | 52.45 |
| 600392 | 2017 | -0.31 | 0.01 | 0.87807 | 0.77100608 | 22.84566 | 0.060691 | 14.04 |
| 2190   | 2017 | 0.075 | 0.01 | 0.87807 | 0.77100608 | 22.94262 | -0.06214 | 51.33 |
| 600875 | 2017 | 0.328 | 0.01 | 0.87807 | 0.77100608 | 25.09171 | 0.030001 | 41.68 |
| 300366 | 2017 | 1.338 | 0.01 | 0.87807 | 0.77100608 | 22.03765 | 0.058268 | 25.78 |
| 2422   | 2017 | -0.42 | 0.01 | 0.87807 | 0.77100608 | 24.05505 | 0.067689 | 26.33 |
| 600875 | 2017 | -0.19 | 0.01 | 0.87807 | 0.77100608 | 25.09171 | 0.030001 | 41.68 |
| 300540 | 2017 | 0.457 | 0.01 | 0.87807 | 0.77100608 | 20.68516 | 0.031543 | 13.39 |
| 600438 | 2017 | -0.26 | 0.01 | 0.87807 | 0.77100608 | 23.96384 | 0.148954 | 52.45 |
| 600466 | 2017 | -0.34 | 0.01 | 0.87807 | 0.77100608 | 25.27967 | 0.065668 | 53.62 |
| 2539   | 2017 | -0.95 | 0.01 | 0.87807 | 0.77100608 | 22.95331 | 0.032443 | 38.94 |
| 600391 | 2017 | 0.562 | 0.01 | 0.87807 | 0.77100608 | 22.48414 | 0.030421 | 36.02 |
| 300101 | 2017 | 1.541 | 0.01 | 0.87807 | 0.77100608 | 20.96795 | 0.044041 | 29.83 |
| 2422   | 2017 | -0.19 | 0.01 | 0.87807 | 0.77100608 | 24.05505 | 0.067689 | 26.33 |
| 300019 | 2017 | 0.755 | 0.01 | 0.87807 | 0.77100608 | 20.70081 | 0.068925 | 17.8  |
| 2268   | 2017 | 1.569 | 0.01 | 0.87807 | 0.77100608 | 22.16709 | 0.040397 | 37.79 |
| 600378 | 2017 | 0.211 | 0.01 | 0.87807 | 0.77100608 | 20.77913 | 0.074021 | 23.82 |
| 300249 | 2017 | 0.165 | 0.01 | 0.87807 | 0.77100608 | 21.64103 | 0.09145  | 17.6  |
| 300414 | 2017 | 0.22  | 0.01 | 0.87807 | 0.77100608 | 20.6899  | 0.044622 | 40.72 |
| 2651   | 2017 | 0.35  | 0.01 | 0.87807 | 0.77100608 | 21.62447 | 0.065092 | 35.12 |
| 300414 | 2017 | -0.18 | 0.01 | 0.87807 | 0.77100608 | 20.6899  | 0.044622 | 40.72 |
| 300101 | 2017 | 1.577 | 0.01 | 0.87807 | 0.77100608 | 20.96795 | 0.044041 | 29.83 |
| 2651   | 2017 | 0.105 | 0.01 | 0.87807 | 0.77100608 | 21.62447 | 0.065092 | 35.12 |
| 790    | 2017 | -0.39 | 0.01 | 0.87807 | 0.77100608 | 21.00548 | 0.204642 | 18.08 |
| 2253   | 2017 | 1.145 | 0.01 | 0.87807 | 0.77100608 | 21.14715 | 0.036095 | 8.01  |
| 601811 | 2017 | 0.361 | 0.01 | 0.87807 | 0.77100608 | 23.23178 | 0.115182 | 49.11 |
| 300366 | 2017 | 0.856 | 0.01 | 0.87807 | 0.77100608 | 22.03765 | 0.058268 | 25.78 |
| 2190   | 2017 | 0.393 | 0.01 | 0.87807 | 0.77100608 | 22.94262 | -0.06214 | 51.33 |
| 600391 | 2017 | 0.562 | 0.01 | 0.87807 | 0.77100608 | 22.27533 | 0.030421 | 36.02 |
| 300434 | 2017 | -0.17 | 0.01 | 0.87807 | 0.77100608 | 21.86387 | 0.045709 | 16.63 |
| 300434 | 2017 | -0.17 | 0.01 | 0.87807 | 0.77100608 | 21.64041 | 0.045709 | 16.63 |
| 2253   | 2017 | 2.47  | 0.01 | 0.87807 | 0.77100608 | 21.14715 | 0.036095 | 8.01  |
| 601811 | 2017 | 0.361 | 0.01 | 0.87807 | 0.77100608 | 23.23178 | 0.115182 | 49.11 |
| 2268   | 2017 | 1.487 | 0.01 | 0.87807 | 0.77100608 | 22.47309 | 0.040397 | 37.79 |
| 2422   | 2017 | -0.34 | 0.01 | 0.87807 | 0.77100608 | 24.05505 | 0.067689 | 26.33 |
| 2253   | 2017 | 1.145 | 0.01 | 0.87807 | 0.77100608 | 21.08716 | 0.036095 | 8.01  |
| 2268   | 2017 | 1.569 | 0.01 | 0.87807 | 0.77100608 | 22.47309 | 0.040397 | 37.79 |
| 300535 | 2017 | 0.89  | 0.01 | 0.87807 | 0.77100608 | 20.40181 | 0.078088 | 23.13 |
| 601811 | 2017 | 0.361 | 0.01 | 0.87807 | 0.77100608 | 23.23178 | 0.115182 | 49.11 |
| 300440 | 2017 | 0.326 | 0.01 | 0.87807 | 0.77100608 | 21.2933  | 0.093551 | 50.47 |
| 300463 | 2017 | 0.469 | 0.01 | 0.87807 | 0.77100608 | 21.99952 | 0.156309 | 12.2  |
| 2777   | 2017 | 1.083 | 0.01 | 0.87807 | 0.77100608 | 20.98379 | 0.183072 | 28.35 |
| 600353 | 2017 | -0.52 | 0.01 | 0.87807 | 0.77100608 | 21.2754  | 0.036011 | 27.91 |
| 600674 | 2017 | -0.16 | 0.01 | 0.87807 | 0.77100608 | 24.09144 | 0.144054 | 50.66 |
| 300535 | 2017 | 0.89  | 0.01 | 0.87807 | 0.77100608 | 20.40181 | 0.078088 | 23.13 |
| 600466 | 2017 | -0.67 | 0.01 | 0.87807 | 0.77100608 | 25.27967 | 0.065668 | 53.62 |

|        |      |       |      |         |            |          |          |       |
|--------|------|-------|------|---------|------------|----------|----------|-------|
| 2480   | 2017 | -0.37 | 0.01 | 0.87807 | 0.77100608 | 22.44364 | 0.007609 | 22.98 |
| 600438 | 2017 | -0.29 | 0.01 | 0.87807 | 0.77100608 | 23.96384 | 0.148954 | 52.45 |
| 300470 | 2017 | 0.307 | 0.01 | 0.87807 | 0.77100608 | 20.91375 | 0.121464 | 27.76 |
| 2651   | 2017 | 0.274 | 0.01 | 0.87807 | 0.77100608 | 21.5288  | 0.065092 | 35.12 |
| 300463 | 2017 | 0.464 | 0.01 | 0.87807 | 0.77100608 | 21.99952 | 0.156309 | 12.2  |
| 600875 | 2017 | 0.328 | 0.01 | 0.87807 | 0.77100608 | 25.09171 | 0.030001 | 41.68 |
| 600875 | 2017 | -0.06 | 0.01 | 0.87807 | 0.77100608 | 25.09171 | 0.030001 | 41.68 |
| 300101 | 2017 | 1.541 | 0.01 | 0.87807 | 0.77100608 | 20.96795 | 0.044041 | 29.83 |
| 300463 | 2017 | 0.953 | 0.01 | 0.87807 | 0.77100608 | 21.99952 | 0.156309 | 12.2  |
| 600438 | 2017 | -0.26 | 0.01 | 0.87807 | 0.77100608 | 23.96384 | 0.148954 | 52.45 |
| 300463 | 2017 | 0.935 | 0.01 | 0.87807 | 0.77100608 | 21.66596 | 0.156309 | 12.2  |
| 598    | 2017 | -0.9  | 0.01 | 0.87807 | 0.77100608 | 23.65471 | 0.089957 | 42.1  |
| 601811 | 2017 | 0.361 | 0.01 | 0.87807 | 0.77100608 | 23.23178 | 0.115182 | 49.11 |
| 300414 | 2017 | 0.245 | 0.01 | 0.87807 | 0.77100608 | 20.65352 | 0.044622 | 40.72 |
| 300249 | 2017 | -0.5  | 0.01 | 0.87807 | 0.77100608 | 21.64103 | 0.09145  | 17.6  |
| 300471 | 2017 | 0.203 | 0.01 | 0.87807 | 0.77100608 | 21.77616 | 0.017204 | 32.29 |
| 300440 | 2017 | 0.835 | 0.01 | 0.87807 | 0.77100608 | 21.32421 | 0.093551 | 50.47 |
| 598    | 2017 | -0.74 | 0.01 | 0.87807 | 0.77100608 | 23.65471 | 0.089957 | 42.1  |
| 300471 | 2017 | -0.28 | 0.01 | 0.87807 | 0.77100608 | 21.77616 | 0.017204 | 32.29 |
| 300249 | 2017 | -0.3  | 0.01 | 0.87807 | 0.77100608 | 21.64103 | 0.09145  | 17.6  |
| 300434 | 2017 | -0.17 | 0.01 | 0.87807 | 0.77100608 | 21.86387 | 0.045709 | 16.63 |
| 300434 | 2017 | -0.17 | 0.01 | 0.87807 | 0.77100608 | 21.86387 | 0.045709 | 16.63 |
| 300502 | 2017 | -0.5  | 0.01 | 0.87807 | 0.77100608 | 21.06142 | 0.102133 | 13.8  |
| 300425 | 2017 | -0.67 | 0.01 | 0.87807 | 0.77100608 | 21.68253 | 0.061874 | 40.81 |
| 300425 | 2017 | -0.29 | 0.01 | 0.87807 | 0.77100608 | 21.68253 | 0.061874 | 40.81 |
| 300425 | 2017 | -0.29 | 0.01 | 0.87807 | 0.77100608 | 21.68253 | 0.061874 | 40.81 |
| 2539   | 2017 | 0.378 | 0.01 | 0.87807 | 0.77100608 | 22.95331 | 0.032443 | 38.94 |
| 2539   | 2017 | -0.95 | 0.01 | 0.87807 | 0.77100608 | 22.95331 | 0.032443 | 38.94 |
| 2480   | 2017 | 0.068 | 0.01 | 0.87807 | 0.77100608 | 22.44364 | 0.007609 | 22.98 |
| 2422   | 2017 | 0.546 | 0.01 | 0.87807 | 0.77100608 | 24.05505 | 0.067689 | 26.33 |
| 2480   | 2017 | -0.37 | 0.01 | 0.87807 | 0.77100608 | 22.44364 | 0.007609 | 22.98 |
| 300249 | 2017 | -0.26 | 0.01 | 0.87807 | 0.77100608 | 21.64103 | 0.09145  | 17.6  |
| 586    | 2017 | -0.01 | 0.01 | 0.87807 | 0.77100608 | 20.14466 | 0.003603 | 20.68 |
| 600438 | 2017 | -0.26 | 0.01 | 0.87807 | 0.77100608 | 23.96384 | 0.148954 | 52.45 |
| 2190   | 2017 | 0.382 | 0.01 | 0.87807 | 0.77100608 | 22.94262 | -0.06214 | 51.33 |
| 600392 | 2017 | -0.31 | 0.01 | 0.87807 | 0.77100608 | 22.84566 | 0.060691 | 14.04 |
| 2253   | 2017 | 1.145 | 0.01 | 0.87807 | 0.77100608 | 21.14715 | 0.036095 | 8.01  |
| 300471 | 2017 | 0.203 | 0.01 | 0.87807 | 0.77100608 | 21.77616 | 0.017204 | 32.29 |
| 300434 | 2017 | -0.17 | 0.01 | 0.87807 | 0.77100608 | 21.86387 | 0.045709 | 16.63 |
| 2777   | 2017 | 1.083 | 0.01 | 0.87807 | 0.77100608 | 20.89672 | 0.183072 | 28.35 |
| 2190   | 2017 | 0.141 | 0.01 | 0.87807 | 0.77100608 | 22.94262 | -0.06214 | 51.33 |
| 2539   | 2017 | -0.95 | 0.01 | 0.87807 | 0.77100608 | 22.95331 | 0.032443 | 38.94 |
| 2023   | 2017 | 0.715 | 0.01 | 0.87807 | 0.77100608 | 22.55524 | 0.004662 | 17.18 |
| 2268   | 2017 | 0.686 | 0.01 | 0.87807 | 0.77100608 | 22.47309 | 0.040397 | 37.79 |
| 300028 | 2017 | 2.093 | 0.01 | 0.87807 | 0.77100608 | 20.10336 | -0.4336  | 27.98 |
| 586    | 2017 | -0.67 | 0.01 | 0.87807 | 0.77100608 | 20.14466 | 0.003603 | 20.68 |
| 300366 | 2017 | 0.675 | 0.01 | 0.87807 | 0.77100608 | 22.03765 | 0.058268 | 25.78 |
| 300362 | 2017 | 0.024 | 0.01 | 0.87807 | 0.77100608 | 22.37522 | 0.03781  | 30.43 |
| 2773   | 2017 | -0.01 | 0.01 | 0.87807 | 0.77100608 | 21.86934 | 0.1818   | 33.28 |
| 300362 | 2017 | 0.024 | 0.01 | 0.87807 | 0.77100608 | 22.37522 | 0.03781  | 30.43 |
| 300101 | 2017 | 1.552 | 0.01 | 0.87807 | 0.77100608 | 20.96795 | 0.044041 | 29.83 |
| 2023   | 2017 | 0.936 | 0.01 | 0.87807 | 0.77100608 | 22.28753 | 0.004662 | 17.18 |
| 600392 | 2017 | 0.6   | 0.01 | 0.87807 | 0.77100608 | 22.59296 | 0.060691 | 14.04 |
| 2773   | 2017 | 0.459 | 0.01 | 0.87807 | 0.77100608 | 22.24631 | 0.1818   | 33.28 |

|        |      |       |      |         |            |          |          |       |
|--------|------|-------|------|---------|------------|----------|----------|-------|
| 2773   | 2017 | -0.2  | 0.01 | 0.87807 | 0.77100608 | 22.24631 | 0.1818   | 33.28 |
| 2422   | 2017 | 0.907 | 0.01 | 0.87807 | 0.77100608 | 24.05505 | 0.067689 | 26.33 |
| 600438 | 2017 | -0.26 | 0.01 | 0.87807 | 0.77100608 | 23.62629 | 0.148954 | 52.45 |
| 300471 | 2017 | -0.06 | 0.01 | 0.87807 | 0.77100608 | 21.77616 | 0.017204 | 32.29 |
| 598    | 2017 | -0.9  | 0.01 | 0.87807 | 0.77100608 | 23.06744 | 0.089957 | 42.1  |
| 600392 | 2017 | -0.06 | 0.01 | 0.87807 | 0.77100608 | 22.84566 | 0.060691 | 14.04 |
| 300535 | 2017 | 0.89  | 0.01 | 0.87807 | 0.77100608 | 20.31995 | 0.078088 | 23.13 |
| 586    | 2017 | -0.12 | 0.01 | 0.87807 | 0.77100608 | 20.14466 | 0.003603 | 20.68 |
| 2773   | 2017 | -0.01 | 0.01 | 0.87807 | 0.77100608 | 22.24631 | 0.1818   | 33.28 |
| 300127 | 2017 | -0.06 | 0.01 | 0.87807 | 0.77100608 | 20.97902 | 0.159187 | 32.2  |
| 300502 | 2017 | -0.5  | 0.01 | 0.87807 | 0.77100608 | 21.06142 | 0.102133 | 13.8  |
| 2773   | 2017 | -0.01 | 0.01 | 0.87807 | 0.77100608 | 22.24631 | 0.1818   | 33.28 |
| 2190   | 2017 | 0.261 | 0.01 | 0.87807 | 0.77100608 | 22.94262 | -0.06214 | 51.33 |
| 2749   | 2017 | 0.704 | 0.01 | 0.87807 | 0.77100608 | 20.50043 | 0.216416 | 37.76 |
| 300535 | 2017 | 0.89  | 0.01 | 0.87807 | 0.77100608 | 20.40181 | 0.078088 | 23.13 |
| 2749   | 2017 | 0.704 | 0.01 | 0.87807 | 0.77100608 | 20.70867 | 0.216416 | 37.76 |
| 2190   | 2017 | 0.141 | 0.01 | 0.87807 | 0.77100608 | 22.94262 | -0.06214 | 51.33 |
| 601811 | 2017 | 0.361 | 0.01 | 0.87807 | 0.77100608 | 23.23178 | 0.115182 | 49.11 |
| 598    | 2017 | -0.74 | 0.01 | 0.87807 | 0.77100608 | 23.65471 | 0.089957 | 42.1  |
| 600438 | 2017 | -0.26 | 0.01 | 0.87807 | 0.77100608 | 23.96384 | 0.148954 | 52.45 |
| 601811 | 2017 | 0.361 | 0.01 | 0.87807 | 0.77100608 | 23.23178 | 0.115182 | 49.11 |
| 300502 | 2017 | -0.5  | 0.01 | 0.87807 | 0.77100608 | 21.06142 | 0.102133 | 13.8  |
| 300366 | 2017 | 1.338 | 0.01 | 0.87807 | 0.77100608 | 22.03765 | 0.058268 | 25.78 |
| 2651   | 2017 | 0.312 | 0.01 | 0.87807 | 0.77100608 | 21.62447 | 0.065092 | 35.12 |
| 2480   | 2017 | 0.068 | 0.01 | 0.87807 | 0.77100608 | 22.24905 | 0.007609 | 22.98 |
| 600392 | 2017 | -0.31 | 0.01 | 0.87807 | 0.77100608 | 22.84566 | 0.060691 | 14.04 |
| 300366 | 2017 | 0.013 | 0.01 | 0.87807 | 0.77100608 | 21.75291 | 0.058268 | 25.78 |
| 2422   | 2017 | 0.907 | 0.01 | 0.87807 | 0.77100608 | 24.05505 | 0.067689 | 26.33 |
| 600391 | 2017 | 0.562 | 0.01 | 0.87807 | 0.77100608 | 22.48414 | 0.030421 | 36.02 |
| 600779 | 2017 | -0.05 | 0.01 | 0.87807 | 0.77100608 | 21.74891 | 0.212296 | 39.71 |
| 2651   | 2017 | 0.295 | 0.01 | 0.87807 | 0.77100608 | 21.62447 | 0.065092 | 35.12 |
| 300440 | 2017 | 0.326 | 0.01 | 0.87807 | 0.77100608 | 21.32421 | 0.093551 | 50.47 |
| 2023   | 2017 | 0.494 | 0.01 | 0.87807 | 0.77100608 | 22.28753 | 0.004662 | 17.18 |
| 600674 | 2017 | 0.27  | 0.01 | 0.87807 | 0.77100608 | 23.97672 | 0.144054 | 50.66 |
| 586    | 2017 | -0.13 | 0.01 | 0.87807 | 0.77100608 | 20.14466 | 0.003603 | 20.68 |
| 300440 | 2017 | 0.835 | 0.01 | 0.87807 | 0.77100608 | 21.32421 | 0.093551 | 50.47 |
| 300434 | 2017 | -0.17 | 0.01 | 0.87807 | 0.77100608 | 21.86387 | 0.045709 | 16.63 |
| 600674 | 2017 | -0.16 | 0.01 | 0.87807 | 0.77100608 | 24.09144 | 0.144054 | 50.66 |
| 300101 | 2017 | 1.644 | 0.01 | 0.87807 | 0.77100608 | 20.96795 | 0.044041 | 29.83 |
| 300440 | 2017 | 1.651 | 0.01 | 0.87807 | 0.77100608 | 21.32421 | 0.093551 | 50.47 |
| 300425 | 2017 | -0.3  | 0.01 | 0.87807 | 0.77100608 | 21.68253 | 0.061874 | 40.81 |
| 2422   | 2017 | -0.42 | 0.01 | 0.87807 | 0.77100608 | 24.05505 | 0.067689 | 26.33 |
| 300028 | 2017 | 1.889 | 0.01 | 0.87807 | 0.77100608 | 20.10336 | -0.4336  | 27.98 |
| 600392 | 2017 | -0.31 | 0.01 | 0.87807 | 0.77100608 | 22.84566 | 0.060691 | 14.04 |
| 2539   | 2017 | -0.49 | 0.01 | 0.87807 | 0.77100608 | 22.95331 | 0.032443 | 38.94 |
| 300559 | 2017 | 1.532 | 0.01 | 0.87807 | 0.77100608 | 20.36494 | 0.112387 | 34.08 |
| 300101 | 2017 | 1.514 | 0.01 | 0.87807 | 0.77100608 | 20.96795 | 0.044041 | 29.83 |
| 300414 | 2017 | -0.18 | 0.01 | 0.87807 | 0.77100608 | 20.6899  | 0.044622 | 40.72 |
| 300540 | 2017 | 0.457 | 0.01 | 0.87807 | 0.77100608 | 20.68516 | 0.031543 | 13.39 |
| 2422   | 2017 | -0.19 | 0.01 | 0.87807 | 0.77100608 | 24.05505 | 0.067689 | 26.33 |
| 790    | 2017 | -0.39 | 0.01 | 0.87807 | 0.77100608 | 20.93167 | 0.204642 | 18.08 |
| 790    | 2017 | -0.39 | 0.01 | 0.87807 | 0.77100608 | 21.00548 | 0.204642 | 18.08 |
| 790    | 2017 | -0.39 | 0.01 | 0.87807 | 0.77100608 | 21.00548 | 0.204642 | 18.08 |
| 2268   | 2017 | 1.569 | 0.01 | 0.87807 | 0.77100608 | 22.47309 | 0.040397 | 37.79 |

|        |      |       |      |          |            |          |          |       |
|--------|------|-------|------|----------|------------|----------|----------|-------|
| 2539   | 2017 | -0.95 | 0.01 | 0.87807  | 0.77100608 | 22.95331 | 0.032443 | 38.94 |
| 2749   | 2017 | 0.704 | 0.01 | 0.87807  | 0.77100608 | 20.70867 | 0.216416 | 37.76 |
| 600779 | 2017 | -0.05 | 0.01 | 0.87807  | 0.77100608 | 21.42759 | 0.212296 | 39.71 |
| 2023   | 2017 | 1.267 | 0.01 | 0.87807  | 0.77100608 | 22.28753 | 0.004662 | 17.18 |
| 2777   | 2017 | 1.083 | 0.01 | 0.87807  | 0.77100608 | 20.98379 | 0.183072 | 28.35 |
| 600438 | 2017 | -0.17 | 0.01 | 0.87807  | 0.77100608 | 23.96384 | 0.148954 | 52.45 |
| 600466 | 2017 | -0.43 | 0.01 | 0.87807  | 0.77100608 | 25.27967 | 0.065668 | 53.62 |
| 2268   | 2017 | 1.569 | 0.01 | 0.87807  | 0.77100608 | 22.47309 | 0.040397 | 37.79 |
| 600438 | 2017 | 0.052 | 0.01 | 0.87807  | 0.77100608 | 23.96384 | 0.148954 | 52.45 |
| 300559 | 2017 | 1.532 | 0.01 | 0.87807  | 0.77100608 | 20.44563 | 0.112387 | 34.08 |
| 300127 | 2017 | -0.06 | 0.01 | 0.87807  | 0.77100608 | 20.97026 | 0.159187 | 32.2  |
| 586    | 2017 | -0.13 | 0.01 | 0.87807  | 0.77100608 | 20.10336 | 0.003603 | 20.68 |
| 2773   | 2017 | -0.01 | 0.01 | 0.87807  | 0.77100608 | 22.24631 | 0.1818   | 33.28 |
| 600875 | 2017 | 0.328 | 0.01 | 0.87807  | 0.77100608 | 25.09171 | 0.030001 | 41.68 |
| 2777   | 2017 | 1.083 | 0.01 | 0.87807  | 0.77100608 | 20.98379 | 0.183072 | 28.35 |
| 2253   | 2017 | 1.145 | 0.01 | 0.87807  | 7.71E-01   | 21.14715 | 0.036095 | 8.01  |
| 2190   | 2017 | 0.558 | 0.01 | 0.87807  | 7.71E-01   | 22.94262 | -0.06214 | 51.33 |
| 600875 | 2017 | 0.289 | 0.01 | 0.87807  | 7.71E-01   | 24.49314 | 0.030001 | 41.68 |
| 600466 | 2017 | -0.32 | 0.01 | 0.87807  | 7.71E-01   | 25.27967 | 0.065668 | 53.62 |
| 600353 | 2017 | -0.52 | 0.01 | 0.87807  | 7.71E-01   | 21.2754  | 0.036011 | 27.91 |
| 600875 | 2017 | 0.328 | 0.01 | 0.87807  | 7.71E-01   | 25.09171 | 0.030001 | 41.68 |
| 300540 | 2017 | 0.123 | 0.01 | 0.87807  | 7.71E-01   | 20.68516 | 0.031543 | 13.39 |
| 300028 | 2017 | 2.093 | 0.01 | 0.87807  | 7.71E-01   | 20.10336 | -0.4336  | 27.98 |
| 300559 | 2017 | 1.532 | 0.01 | 0.87807  | 7.71E-01   | 20.44563 | 0.112387 | 34.08 |
| 300471 | 2017 | 0.827 | 0.01 | 0.87807  | 7.71E-01   | 21.77616 | 0.017204 | 32.29 |
| 600438 | 2017 | -0.26 | 0.01 | 0.87807  | 7.71E-01   | 23.96384 | 0.148954 | 52.45 |
| 600438 | 2017 | -0.26 | 0.01 | 0.87807  | 7.71E-01   | 23.96384 | 0.148954 | 52.45 |
| 600438 | 2017 | -0.26 | 0.01 | 0.87807  | 0.77100608 | 23.96384 | 0.148954 | 52.45 |
| 600438 | 2017 | -0.67 | 0.01 | 0.87807  | 0.77100608 | 23.96384 | 0.148954 | 52.45 |
| 2268   | 2017 | 1.569 | 0.01 | 0.87807  | 0.77100608 | 22.47309 | 0.040397 | 37.79 |
| 600392 | 2017 | -0.72 | 0.01 | 0.87807  | 0.77100608 | 22.84566 | 0.060691 | 14.04 |
| 790    | 2017 | -0.39 | 0.01 | 0.87807  | 0.77100608 | 21.00548 | 0.204642 | 18.08 |
| 300101 | 2017 | 1.367 | 0.01 | 0.87807  | 0.77100608 | 20.96795 | 0.044041 | 29.83 |
| 300471 | 2017 | -0.28 | 0.01 | 0.87807  | 0.77100608 | 21.77616 | 0.017204 | 32.29 |
| 600438 | 2017 | -0.26 | 0.01 | 0.87807  | 0.77100608 | 23.96384 | 0.148954 | 52.45 |
| 600518 | 2017 | 0.154 | 0.02 | 1.414904 | 2.0019545  | 24.90215 | 0.083904 | 32.98 |
| 2495   | 2017 | -0.55 | 0.02 | 1.414904 | 2.0019545  | 20.89619 | 0.018857 | 17.15 |
| 2776   | 2017 | 0.511 | 0.02 | 1.414904 | 2.0019545  | 21.69061 | 0.059231 | 29.55 |
| 2031   | 2017 | -0.09 | 0.02 | 1.414904 | 2.0019545  | 22.67133 | 0.037927 | 18.24 |
| 2348   | 2017 | -0.55 | 0.02 | 1.414904 | 2.0019545  | 21.27168 | 0.045003 | 19.76 |
| 2031   | 2017 | 0.788 | 0.02 | 1.414904 | 2.0019545  | 22.67133 | 0.037927 | 18.24 |
| 600518 | 2017 | -0.27 | 0.02 | 1.414904 | 2.0019545  | 24.90215 | 0.083904 | 32.98 |
| 2348   | 2017 | -0.55 | 0.02 | 1.414904 | 2.0019545  | 21.27168 | 0.045003 | 19.76 |
| 600518 | 2017 | 0.215 | 0.02 | 1.414904 | 2.0019545  | 24.90215 | 0.083904 | 32.98 |
| 600518 | 2017 | 0.436 | 0.02 | 1.414904 | 2.0019545  | 24.90215 | 0.083904 | 32.98 |
| 600518 | 2017 | 0.397 | 0.02 | 1.414904 | 2.0019545  | 24.90215 | 0.083904 | 32.98 |
| 600518 | 2017 | -0.89 | 0.02 | 1.414904 | 2.0019545  | 24.90215 | 0.083904 | 32.98 |
| 2776   | 2017 | 0.511 | 0.02 | 1.414904 | 2.0019545  | 21.69781 | 0.059231 | 29.55 |
| 2031   | 2017 | -0.14 | 0.02 | 1.414904 | 2.0019545  | 22.67133 | 0.037927 | 18.24 |
| 600518 | 2017 | 0.388 | 0.02 | 1.414904 | 2.0019545  | 24.90215 | 0.083904 | 32.98 |
| 2348   | 2017 | 0.117 | 0.02 | 1.414904 | 2.0019545  | 21.27168 | 0.045003 | 19.76 |
| 600518 | 2017 | 0.436 | 0.02 | 1.414904 | 2.0019545  | 24.90215 | 0.083904 | 32.98 |
| 2776   | 2017 | 0.511 | 0.02 | 1.414904 | 2.0019545  | 21.69781 | 0.059231 | 29.55 |
| 600518 | 2017 | 0.436 | 0.02 | 1.414904 | 2.0019545  | 24.90215 | 0.083904 | 32.98 |



|        |      |       |      |          |            |          |          |       |
|--------|------|-------|------|----------|------------|----------|----------|-------|
| 2031   | 2017 | -0.14 | 0.02 | 1.414904 | 2.0019545  | 22.67133 | 0.037927 | 18.24 |
| 2031   | 2017 | -0.14 | 0.02 | 1.414904 | 2.0019545  | 22.67133 | 0.037927 | 18.24 |
| 2348   | 2017 | 0.117 | 0.02 | 1.414904 | 2.0019545  | 21.27168 | 0.045003 | 19.76 |
| 2348   | 2017 | -0.37 | 0.02 | 1.414904 | 2.0019545  | 21.17369 | 0.045003 | 19.76 |
| 2495   | 2017 | -0.55 | 0.02 | 1.414904 | 2.0019545  | 20.92606 | 0.018857 | 17.15 |
| 600518 | 2017 | -0.27 | 0.02 | 1.414904 | 2.0019545  | 24.90215 | 0.083904 | 32.98 |
| 600518 | 2017 | 0.154 | 0.02 | 1.414904 | 2.0019545  | 24.90215 | 0.083904 | 32.98 |
| 2031   | 2017 | -0.27 | 0.02 | 1.414904 | 2.0019545  | 22.67133 | 0.037927 | 18.24 |
| 600518 | 2017 | 0.436 | 0.02 | 1.414904 | 2.0019545  | 24.90215 | 0.083904 | 32.98 |
| 2031   | 2017 | -0.17 | 0.02 | 1.414904 | 2.0019545  | 22.3967  | 0.037927 | 18.24 |
| 600518 | 2017 | 0.436 | 0.02 | 1.414904 | 2.0019545  | 24.90215 | 0.083904 | 32.98 |
| 600518 | 2017 | 0.154 | 0.02 | 1.414904 | 2.0019545  | 24.85929 | 0.083904 | 32.98 |
| 600518 | 2017 | 0.436 | 0.02 | 1.414904 | 2.0019545  | 24.90215 | 0.083904 | 32.98 |
| 2495   | 2017 | -0.55 | 0.02 | 1.414904 | 2.0019545  | 20.92606 | 0.018857 | 17.15 |
| 2031   | 2017 | 0.788 | 0.02 | 1.414904 | 2.0019545  | 22.67133 | 0.037927 | 18.24 |
| 629    | 2017 | 0.359 | 0.01 | 0.06535  | 0.00427067 | 23.07209 | 0.202681 | 35.49 |
| 629    | 2017 | 0.237 | 0.01 | 0.06535  | 0.00427067 | 23.07209 | 0.202681 | 35.49 |
| 629    | 2017 | 0.182 | 0.01 | 0.06535  | 0.00427067 | 23.07209 | 0.202681 | 35.49 |
| 629    | 2017 | 0.27  | 0.01 | 0.06535  | 0.00427067 | 23.07209 | 0.202681 | 35.49 |
| 629    | 2017 | 0.25  | 0.01 | 0.06535  | 0.00427067 | 23.07209 | 0.202681 | 35.49 |
| 629    | 2017 | 0.27  | 0.01 | 0.06535  | 0.00427067 | 23.07209 | 0.202681 | 35.49 |
| 629    | 2017 | 0.245 | 0.01 | 0.06535  | 0.00427067 | 23.07209 | 0.202681 | 35.49 |
| 629    | 2017 | 0.245 | 0.01 | 0.06535  | 0.00427067 | 23.07209 | 0.202681 | 35.49 |
| 629    | 2017 | 0.245 | 0.01 | 0.06535  | 0.00427067 | 22.86893 | 0.202681 | 35.49 |
| 949    | 2017 | 0.255 | 0.02 | 1.577385 | 2.4881436  | 22.59189 | 0.00859  | 30.17 |
| 2007   | 2017 | 0.891 | 0.02 | 1.577385 | 2.4881436  | 22.37563 | 0.165982 | 17.94 |
| 2007   | 2017 | 0.59  | 0.02 | 1.577385 | 2.4881436  | 22.37563 | 0.165982 | 17.94 |
| 949    | 2017 | -0.58 | 0.02 | 1.577385 | 2.4881436  | 22.59189 | 0.00859  | 30.17 |
| 2007   | 2017 | 0.891 | 0.02 | 1.577385 | 2.4881436  | 22.37563 | 0.165982 | 17.94 |
| 2007   | 2017 | 0.45  | 0.02 | 1.577385 | 2.4881436  | 22.37563 | 0.165982 | 17.94 |
| 949    | 2017 | 0.255 | 0.02 | 1.577385 | 2.4881436  | 22.59189 | 0.00859  | 30.17 |
| 2007   | 2017 | 0.59  | 0.02 | 1.577385 | 2.4881436  | 22.37563 | 0.165982 | 17.94 |
| 2007   | 2017 | 0.691 | 0.02 | 1.577385 | 2.4881436  | 22.37563 | 0.165982 | 17.94 |
| 2007   | 2017 | 0.891 | 0.02 | 1.577385 | 2.4881436  | 22.37563 | 0.165982 | 17.94 |
| 949    | 2017 | -0.42 | 0.02 | 1.577385 | 2.4881436  | 22.59189 | 0.00859  | 30.17 |
| 2007   | 2017 | 0.891 | 0.02 | 1.577385 | 2.4881436  | 22.00277 | 0.165982 | 17.94 |
| 2007   | 2017 | 0.891 | 0.02 | 1.577385 | 2.4881436  | 22.37563 | 0.165982 | 17.94 |
| 2007   | 2017 | 0.712 | 0.02 | 1.577385 | 2.4881436  | 22.37563 | 0.165982 | 17.94 |
| 949    | 2017 | -0.58 | 0.02 | 1.577385 | 2.4881436  | 22.58618 | 0.00859  | 30.17 |
| 600584 | 2017 | 0.403 | 0.02 | 1.512937 | 2.2889795  | 24.14749 | 0.007678 | 14.28 |
| 2540   | 2017 | -0    | 0.02 | 1.512937 | 2.2889795  | 22.33458 | 0.06516  | 39.07 |
| 300279 | 2017 | -0.16 | 0.02 | 1.512937 | 2.2889795  | 21.90113 | 0.050606 | 21.56 |
| 603090 | 2017 | 0.352 | 0.02 | 1.512937 | 2.2889795  | 20.21361 | 0.054898 | 54.68 |
| 300031 | 2017 | 0.076 | 0.02 | 1.512937 | 2.2889795  | 21.88808 | 0.100654 | 22.75 |
| 300279 | 2017 | -0.6  | 0.02 | 1.512937 | 2.2889795  | 21.90113 | 0.050606 | 21.56 |
| 2009   | 2017 | -0.32 | 0.02 | 1.512937 | 2.2889795  | 22.39502 | 0.042121 | 16.84 |
| 2692   | 2017 | -0.36 | 0.02 | 1.512937 | 2.2889795  | 21.7217  | 0.04633  | 22.18 |
| 603090 | 2017 | -0.37 | 0.02 | 1.512937 | 2.2889795  | 20.21361 | 0.054898 | 54.68 |
| 300135 | 2017 | -0.21 | 0.02 | 1.512937 | 2.2889795  | 21.84358 | 0.029799 | 30.52 |
| 300555 | 2017 | -0.39 | 0.02 | 1.512937 | 2.2889795  | 20.5223  | 0.072364 | 10.46 |
| 600475 | 2017 | -0.43 | 0.02 | 1.512937 | 2.2889795  | 23.04008 | 0.09221  | 72.11 |
| 2778   | 2017 | 0.719 | 0.02 | 1.512937 | 2.2889795  | 20.41426 | 0.049571 | 37.67 |
| 2471   | 2017 | -0.58 | 0.02 | 1.512937 | 2.2889795  | 22.93843 | 0.039782 | 20    |
| 603519 | 2017 | -0.25 | 0.02 | 1.512937 | 2.2889795  | 20.66843 | 0.11543  | 44.81 |

|        |      |       |      |          |           |          |          |       |
|--------|------|-------|------|----------|-----------|----------|----------|-------|
| 2009   | 2017 | 0.338 | 0.02 | 1.512937 | 2.2889795 | 22.39502 | 0.042121 | 16.84 |
| 2455   | 2017 | -0.71 | 0.02 | 1.512937 | 2.2889795 | 21.683   | 0.078936 | 31.78 |
| 600667 | 2017 | -0.14 | 0.02 | 1.512937 | 2.2889795 | 23.54717 | 0.075764 | 36.09 |
| 581    | 2017 | -0.03 | 0.02 | 1.512937 | 2.2889795 | 23.73048 | 0.172441 | 20.22 |
| 300450 | 2017 | -0.01 | 0.02 | 1.512937 | 2.2889795 | 22.61805 | 0.193178 | 37.61 |
| 2610   | 2017 | -0.61 | 0.02 | 1.512937 | 2.2889795 | 23.56134 | 0.019317 | 15.66 |
| 2471   | 2017 | 0.215 | 0.02 | 1.512937 | 2.2889795 | 22.93843 | 0.039782 | 20    |
| 2540   | 2017 | 0.128 | 0.02 | 1.512937 | 2.2889795 | 22.33458 | 0.06516  | 39.07 |
| 300385 | 2017 | 0.229 | 0.02 | 1.512937 | 2.2889795 | 21.50912 | 0.064015 | 39.1  |
| 300135 | 2017 | -0.21 | 0.02 | 1.512937 | 2.2889795 | 21.84358 | 0.029799 | 30.52 |
| 600398 | 2017 | -0.96 | 0.02 | 1.512937 | 2.2889795 | 23.94607 | 0.297864 | 39.31 |
| 2778   | 2017 | 0.719 | 0.02 | 1.512937 | 2.2889795 | 20.41426 | 0.049571 | 37.67 |
| 300135 | 2017 | -0.21 | 0.02 | 1.512937 | 2.2889795 | 21.84358 | 0.029799 | 30.52 |
| 300135 | 2017 | -0.21 | 0.02 | 1.512937 | 2.2889795 | 21.84358 | 0.029799 | 30.52 |
| 890    | 2017 | -0.33 | 0.02 | 1.512937 | 2.2889795 | 22.99416 | 0.157544 | 21.07 |
| 601500 | 2017 | -0.08 | 0.02 | 1.512937 | 2.2889795 | 22.11158 | 0.05682  | 73.19 |
| 738    | 2017 | 0.688 | 0.02 | 1.512937 | 2.2889795 | 22.69403 | 0.039874 | 23.34 |
| 600584 | 2017 | 0.424 | 0.02 | 1.512937 | 2.2889795 | 24.14749 | 0.007678 | 14.28 |
| 300385 | 2017 | -0.43 | 0.02 | 1.512937 | 2.2889795 | 21.50912 | 0.064015 | 39.1  |
| 2692   | 2017 | -0.36 | 0.02 | 1.512937 | 2.2889795 | 21.85842 | 0.04633  | 22.18 |
| 600584 | 2017 | 0.124 | 0.02 | 1.512937 | 2.2889795 | 24.14749 | 0.007678 | 14.28 |
| 300031 | 2017 | 0.051 | 0.02 | 1.512937 | 2.2889795 | 21.88904 | 0.100654 | 22.75 |
| 600475 | 2017 | -0.16 | 0.02 | 1.512937 | 2.2889795 | 23.04008 | 0.09221  | 72.11 |
| 600667 | 2017 | -0.3  | 0.02 | 1.512937 | 2.2889795 | 22.60735 | 0.075764 | 36.09 |
| 603016 | 2017 | 0.584 | 0.02 | 1.512937 | 2.2889795 | 20.67083 | 0.058073 | 38.74 |
| 603016 | 2017 | 0.643 | 0.02 | 1.512937 | 2.2889795 | 20.67083 | 0.058073 | 38.74 |
| 300537 | 2017 | -0.18 | 0.02 | 1.512937 | 2.2889795 | 21.17158 | 0.049557 | 45.33 |
| 601218 | 2017 | -0.22 | 0.02 | 1.512937 | 2.2889795 | 22.13894 | 0.000773 | 36.49 |
| 890    | 2017 | -0.86 | 0.02 | 1.512937 | 2.2889795 | 22.99416 | 0.157544 | 21.07 |
| 603028 | 2017 | 0.707 | 0.02 | 1.512937 | 2.2889795 | 20.68358 | 0.034942 | 28.91 |
| 300135 | 2017 | -0.21 | 0.02 | 1.512937 | 2.2889795 | 21.84358 | 0.029799 | 30.52 |
| 2445   | 2017 | 0.296 | 0.02 | 1.512937 | 2.2889795 | 22.54361 | 0.067102 | 29.27 |
| 603090 | 2017 | 0.73  | 0.02 | 1.512937 | 2.2889795 | 20.21361 | 0.054898 | 54.68 |
| 603416 | 2017 | 0.587 | 0.02 | 1.512937 | 2.2889795 | 20.84291 | 0.132955 | 35.1  |
| 738    | 2017 | 0.798 | 0.02 | 1.512937 | 2.2889795 | 22.69403 | 0.039874 | 23.34 |
| 603519 | 2017 | -0.25 | 0.02 | 1.512937 | 2.2889795 | 20.66843 | 0.11543  | 44.81 |
| 2009   | 2017 | -0.23 | 0.02 | 1.512937 | 2.2889795 | 22.39502 | 0.042121 | 16.84 |
| 603016 | 2017 | -0.13 | 0.02 | 1.512937 | 2.2889795 | 20.67083 | 0.058073 | 38.74 |
| 300537 | 2017 | -0.18 | 0.02 | 1.512937 | 2.2889795 | 20.98318 | 0.049557 | 45.33 |
| 600481 | 2017 | 0.109 | 0.02 | 1.512937 | 2.2889795 | 22.07228 | 0.044809 | 34.33 |
| 2471   | 2017 | 0.414 | 0.02 | 1.512937 | 2.2889795 | 22.62496 | 0.039782 | 20    |
| 600370 | 2017 | -0.3  | 0.02 | 1.512937 | 2.2889795 | 21.28288 | 0.047086 | 50.33 |
| 600584 | 2017 | 0.124 | 0.02 | 1.512937 | 2.2889795 | 24.14749 | 0.007678 | 14.28 |
| 700    | 2017 | -0.42 | 0.02 | 1.512937 | 2.2889795 | 22.74249 | 0.050007 | 33.07 |
| 600481 | 2017 | -0.47 | 0.02 | 1.512937 | 2.2889795 | 22.07228 | 0.044809 | 34.33 |
| 2395   | 2017 | 0.051 | 0.02 | 1.512937 | 2.2889795 | 20.98056 | 0.031891 | 64.73 |
| 738    | 2017 | 0.688 | 0.02 | 1.512937 | 2.2889795 | 22.17671 | 0.039874 | 23.34 |
| 601500 | 2017 | -0.08 | 0.02 | 1.512937 | 2.2889795 | 22.11012 | 0.05682  | 73.19 |
| 603585 | 2017 | 0.486 | 0.02 | 1.512937 | 2.2889795 | 21.43608 | 0.164047 | 40    |
| 2009   | 2017 | -0.32 | 0.02 | 1.512937 | 2.2889795 | 22.39502 | 0.042121 | 16.84 |
| 603016 | 2017 | -0.13 | 0.02 | 1.512937 | 2.2889795 | 20.67083 | 0.058073 | 38.74 |
| 2540   | 2017 | 0.128 | 0.02 | 1.512937 | 2.2889795 | 22.33458 | 0.06516  | 39.07 |
| 300031 | 2017 | 0.479 | 0.02 | 1.512937 | 2.2889795 | 21.88808 | 0.100654 | 22.75 |
| 2692   | 2017 | -0.61 | 0.02 | 1.512937 | 2.2889795 | 21.85842 | 0.04633  | 22.18 |

|        |      |       |      |          |           |          |          |       |
|--------|------|-------|------|----------|-----------|----------|----------|-------|
| 2610   | 2017 | -0.57 | 0.02 | 1.512937 | 2.2889795 | 23.56134 | 0.019317 | 15.66 |
| 2802   | 2017 | 0.223 | 0.02 | 1.512937 | 2.2889795 | 20.29723 | 0.119197 | 57.56 |
| 2540   | 2017 | -0.02 | 0.02 | 1.512937 | 2.2889795 | 22.33458 | 0.06516  | 39.07 |
| 2009   | 2017 | -0.32 | 0.02 | 1.512937 | 2.2889795 | 22.01055 | 0.042121 | 16.84 |
| 2445   | 2017 | 0.296 | 0.02 | 1.512937 | 2.2889795 | 22.77327 | 0.067102 | 29.27 |
| 2471   | 2017 | -0.43 | 0.02 | 1.512937 | 2.2889795 | 22.93843 | 0.039782 | 20    |
| 300279 | 2017 | -0.14 | 0.02 | 1.512937 | 2.2889795 | 21.90113 | 0.050606 | 21.56 |
| 300031 | 2017 | 0.244 | 0.02 | 1.512937 | 2.2889795 | 21.88808 | 0.100654 | 22.75 |
| 601500 | 2017 | -0.08 | 0.02 | 1.512937 | 2.2889795 | 22.11158 | 0.05682  | 73.19 |
| 600370 | 2017 | -0.3  | 0.02 | 1.512937 | 2.2889795 | 21.28288 | 0.047086 | 50.33 |
| 300135 | 2017 | -0.21 | 0.02 | 1.512937 | 2.2889795 | 21.84358 | 0.029799 | 30.52 |
| 2692   | 2017 | -0.23 | 0.02 | 1.512937 | 2.2889795 | 21.85842 | 0.04633  | 22.18 |
| 2540   | 2017 | -0.04 | 0.02 | 1.512937 | 2.2889795 | 22.19267 | 0.06516  | 39.07 |
| 936    | 2017 | 0.337 | 0.02 | 1.512937 | 2.2889795 | 23.10502 | 0.043809 | 44.2  |
| 300337 | 2017 | -0.65 | 0.02 | 1.512937 | 2.2889795 | 21.71428 | 0.004799 | 34.44 |
| 300337 | 2017 | -0.65 | 0.02 | 1.512937 | 2.2889795 | 21.71428 | 0.004799 | 34.44 |
| 2645   | 2017 | 0.42  | 0.02 | 1.512937 | 2.2889795 | 21.40903 | 0.072784 | 49.69 |
| 603585 | 2017 | 0.265 | 0.02 | 1.512937 | 2.2889795 | 21.43608 | 0.164047 | 40    |
| 700    | 2017 | -0.42 | 0.02 | 1.512937 | 2.2889795 | 22.74249 | 0.050007 | 33.07 |
| 2445   | 2017 | 0.296 | 0.02 | 1.512937 | 2.2889795 | 22.77327 | 0.067102 | 29.27 |
| 300279 | 2017 | 0.725 | 0.02 | 1.512937 | 2.2889795 | 21.90113 | 0.050606 | 21.56 |
| 601218 | 2017 | -0.22 | 0.02 | 1.512937 | 2.2889795 | 22.13894 | 0.000773 | 36.49 |
| 936    | 2017 | 0.337 | 0.02 | 1.512937 | 2.2889795 | 23.10502 | 0.043809 | 44.2  |
| 581    | 2017 | 0.036 | 0.02 | 1.512937 | 2.2889795 | 23.73048 | 0.172441 | 20.22 |
| 600481 | 2017 | 0.857 | 0.02 | 1.512937 | 2.2889795 | 22.07228 | 0.044809 | 34.33 |
| 601218 | 2017 | -0.22 | 0.02 | 1.512937 | 2.2889795 | 22.13894 | 0.000773 | 36.49 |
| 890    | 2017 | -0.86 | 0.02 | 1.512937 | 2.2889795 | 22.99416 | 0.157544 | 21.07 |
| 2540   | 2017 | -0.17 | 0.02 | 1.512937 | 2.2889795 | 22.33458 | 0.06516  | 39.07 |
| 600667 | 2017 | -0.58 | 0.02 | 1.512937 | 2.2889795 | 23.54717 | 0.075764 | 36.09 |
| 2445   | 2017 | 0.296 | 0.02 | 1.512937 | 2.2889795 | 22.77327 | 0.067102 | 29.27 |
| 700    | 2017 | -0.3  | 0.02 | 1.512937 | 2.2889795 | 22.44037 | 0.050007 | 33.07 |
| 300337 | 2017 | 0.675 | 0.02 | 1.512937 | 2.2889795 | 21.71428 | 0.004799 | 34.44 |
| 2685   | 2017 | -0.36 | 0.02 | 1.512937 | 2.2889795 | 22.26387 | 0.037042 | 21.67 |
| 300450 | 2017 | -0.04 | 0.02 | 1.512937 | 2.2889795 | 22.42129 | 0.193178 | 37.61 |
| 600398 | 2017 | -0.37 | 0.02 | 1.512937 | 2.2889795 | 23.94607 | 0.297864 | 39.31 |
| 700    | 2017 | -0.66 | 0.02 | 1.512937 | 2.2889795 | 22.74249 | 0.050007 | 33.07 |
| 2009   | 2017 | -0.1  | 0.02 | 1.512937 | 2.2889795 | 22.39502 | 0.042121 | 16.84 |
| 2009   | 2017 | -0.32 | 0.02 | 1.512937 | 2.2889795 | 22.39502 | 0.042121 | 16.84 |
| 2009   | 2017 | -0.32 | 0.02 | 1.512937 | 2.2889795 | 22.39502 | 0.042121 | 16.84 |
| 2645   | 2017 | 0.108 | 0.02 | 1.512937 | 2.2889795 | 21.52775 | 0.072784 | 49.69 |
| 2471   | 2017 | -0.58 | 0.02 | 1.512937 | 2.2889795 | 22.93843 | 0.039782 | 20    |
| 2645   | 2017 | -0.19 | 0.02 | 1.512937 | 2.2889795 | 21.52775 | 0.072784 | 49.69 |
| 890    | 2017 | -0.86 | 0.02 | 1.512937 | 2.2889795 | 22.99416 | 0.157544 | 21.07 |
| 300031 | 2017 | 0.714 | 0.02 | 1.512937 | 2.2889795 | 21.88808 | 0.100654 | 22.75 |
| 300537 | 2017 | 0.733 | 0.02 | 1.512937 | 2.2889795 | 21.17158 | 0.049557 | 45.33 |
| 300135 | 2017 | -0.13 | 0.02 | 1.512937 | 2.2889795 | 21.84358 | 0.029799 | 30.52 |
| 603585 | 2017 | 0.486 | 0.02 | 1.512937 | 2.2889795 | 21.43608 | 0.164047 | 40    |
| 300555 | 2017 | -0.39 | 0.02 | 1.512937 | 2.2889795 | 20.5223  | 0.072364 | 10.46 |
| 603028 | 2017 | 0.707 | 0.02 | 1.512937 | 2.2889795 | 20.68358 | 0.034942 | 28.91 |
| 581    | 2017 | -0.43 | 0.02 | 1.512937 | 2.2889795 | 23.73048 | 0.172441 | 20.22 |
| 600481 | 2017 | 0.109 | 0.02 | 1.512937 | 2.2889795 | 22.07228 | 0.044809 | 34.33 |
| 2692   | 2017 | -0.36 | 0.02 | 1.512937 | 2.2889795 | 21.85842 | 0.04633  | 22.18 |
| 300337 | 2017 | -0.65 | 0.02 | 1.512937 | 2.2889795 | 21.71428 | 0.004799 | 34.44 |
| 300537 | 2017 | 0.733 | 0.02 | 1.512937 | 2.2889795 | 21.17158 | 0.049557 | 45.33 |

|        |      |       |      |          |           |          |          |       |
|--------|------|-------|------|----------|-----------|----------|----------|-------|
| 2455   | 2017 | 0.101 | 0.02 | 1.512937 | 2.2889795 | 21.683   | 0.078936 | 31.78 |
| 600584 | 2017 | 0.12  | 0.02 | 1.512937 | 2.2889795 | 24.14749 | 0.007678 | 14.28 |
| 600398 | 2017 | -0.46 | 0.02 | 1.512937 | 2.2889795 | 23.94607 | 0.297864 | 39.31 |
| 2395   | 2017 | 0.051 | 0.02 | 1.512937 | 2.2889795 | 20.98056 | 0.031891 | 64.73 |
| 603028 | 2017 | 0.707 | 0.02 | 1.512937 | 2.2889795 | 20.68358 | 0.034942 | 28.91 |
| 603416 | 2017 | 0.587 | 0.02 | 1.512937 | 2.2889795 | 20.84349 | 0.132955 | 35.1  |
| 2610   | 2017 | -0.57 | 0.02 | 1.512937 | 2.2889795 | 23.56134 | 0.019317 | 15.66 |
| 2610   | 2017 | -0.57 | 0.02 | 1.512937 | 2.2889795 | 23.56134 | 0.019317 | 15.66 |
| 2610   | 2017 | -0.57 | 0.02 | 1.512937 | 2.2889795 | 23.56134 | 0.019317 | 15.66 |
| 2610   | 2017 | -0.57 | 0.02 | 1.512937 | 2.2889795 | 23.56134 | 0.019317 | 15.66 |
| 2610   | 2017 | -0.57 | 0.02 | 1.512937 | 2.2889795 | 23.56134 | 0.019317 | 15.66 |
| 603016 | 2017 | 0.643 | 0.02 | 1.512937 | 2.2889795 | 20.6297  | 0.058073 | 38.74 |
| 300385 | 2017 | 0.477 | 0.02 | 1.512937 | 2.2889795 | 21.50912 | 0.064015 | 39.1  |
| 890    | 2017 | -0.19 | 0.02 | 1.512937 | 2.2889795 | 22.99416 | 0.157544 | 21.07 |
| 2692   | 2017 | -0.28 | 0.02 | 1.512937 | 2.2889795 | 21.85842 | 0.04633  | 22.18 |
| 300385 | 2017 | 0.477 | 0.02 | 1.512937 | 2.2889795 | 21.4097  | 0.064015 | 39.1  |
| 2645   | 2017 | 0.291 | 0.02 | 1.512937 | 2.2889795 | 21.52775 | 0.072784 | 49.69 |
| 600475 | 2017 | -0.2  | 0.02 | 1.512937 | 2.2889795 | 23.04008 | 0.09221  | 72.11 |
| 600398 | 2017 | -0.96 | 0.02 | 1.512937 | 2.2889795 | 23.67316 | 0.297864 | 39.31 |
| 2445   | 2017 | 0.296 | 0.02 | 1.512937 | 2.2889795 | 22.77327 | 0.067102 | 29.27 |
| 584    | 2017 | 0.124 | 0.02 | 1.512937 | 2.2889795 | 22.02494 | 0.068494 | 18.6  |
| 2471   | 2017 | 0.745 | 0.02 | 1.512937 | 2.2889795 | 22.93843 | 0.039782 | 20    |
| 600475 | 2017 | -0.2  | 0.02 | 1.512937 | 2.2889795 | 23.04008 | 0.09221  | 72.11 |
| 300537 | 2017 | 0.032 | 0.02 | 1.512937 | 2.2889795 | 21.17158 | 0.049557 | 45.33 |
| 300537 | 2017 | 0.733 | 0.02 | 1.512937 | 2.2889795 | 21.17158 | 0.049557 | 45.33 |
| 890    | 2017 | -0.86 | 0.02 | 1.512937 | 2.2889795 | 22.99416 | 0.157544 | 21.07 |
| 603585 | 2017 | 0.486 | 0.02 | 1.512937 | 2.2889795 | 21.43608 | 0.164047 | 40    |
| 300031 | 2017 | 0.383 | 0.02 | 1.512937 | 2.2889795 | 21.88808 | 0.100654 | 22.75 |
| 2009   | 2017 | -0.26 | 0.02 | 1.512937 | 2.2889795 | 22.39502 | 0.042121 | 16.84 |
| 581    | 2017 | 0.036 | 0.02 | 1.512937 | 2.2889795 | 23.73048 | 0.172441 | 20.22 |
| 2471   | 2017 | -0.58 | 0.02 | 1.512937 | 2.2889795 | 22.93843 | 0.039782 | 20    |
| 2645   | 2017 | -0.19 | 0.02 | 1.512937 | 2.2889795 | 21.52775 | 0.072784 | 49.69 |
| 738    | 2017 | -0.53 | 0.02 | 1.512937 | 2.2889795 | 22.69403 | 0.039874 | 23.34 |
| 581    | 2017 | 0.059 | 0.02 | 1.512937 | 2.2889795 | 23.73048 | 0.172441 | 20.22 |
| 300279 | 2017 | -0.6  | 0.02 | 1.512937 | 2.2889795 | 21.90113 | 0.050606 | 21.56 |
| 581    | 2017 | 0.008 | 0.02 | 1.512937 | 2.2889795 | 23.48483 | 0.172441 | 20.22 |
| 890    | 2017 | -0.86 | 0.02 | 1.512937 | 2.2889795 | 21.81226 | 0.157544 | 21.07 |
| 2802   | 2017 | 0.223 | 0.02 | 1.512937 | 2.2889795 | 20.29723 | 0.119197 | 57.56 |
| 2610   | 2017 | -0.46 | 0.02 | 1.512937 | 2.2889795 | 23.56134 | 0.019317 | 15.66 |
| 2455   | 2017 | 0.263 | 0.02 | 1.512937 | 2.2889795 | 21.683   | 0.078936 | 31.78 |
| 600398 | 2017 | -0.96 | 0.02 | 1.512937 | 2.2889795 | 23.94607 | 0.297864 | 39.31 |
| 300537 | 2017 | 0.733 | 0.02 | 1.512937 | 2.2889795 | 21.17158 | 0.049557 | 45.33 |
| 600584 | 2017 | 0.455 | 0.02 | 1.512937 | 2.2889795 | 23.59444 | 0.007678 | 14.28 |
| 600584 | 2017 | 0.002 | 0.02 | 1.512937 | 2.2889795 | 24.14749 | 0.007678 | 14.28 |
| 600584 | 2017 | 0.455 | 0.02 | 1.512937 | 2.2889795 | 24.14749 | 0.007678 | 14.28 |
| 738    | 2017 | 0.798 | 0.02 | 1.512937 | 2.2889795 | 22.69403 | 0.039874 | 23.34 |
| 600584 | 2017 | 0.73  | 0.02 | 1.512937 | 2.2889795 | 24.14749 | 0.007678 | 14.28 |
| 2540   | 2017 | -0.05 | 0.02 | 1.512937 | 2.2889795 | 22.33458 | 0.06516  | 39.07 |
| 600667 | 2017 | -0.14 | 0.02 | 1.512937 | 2.2889795 | 23.54717 | 0.075764 | 36.09 |
| 936    | 2017 | 0.337 | 0.02 | 1.512937 | 2.2889795 | 23.10502 | 0.043809 | 44.2  |
| 2685   | 2017 | -0.31 | 0.02 | 1.512937 | 2.2889795 | 22.49834 | 0.037042 | 21.67 |
| 300385 | 2017 | 0.229 | 0.02 | 1.512937 | 2.2889795 | 21.50912 | 0.064015 | 39.1  |
| 584    | 2017 | -0.5  | 0.02 | 1.512937 | 2.2889795 | 22.02494 | 0.068494 | 18.6  |
| 600584 | 2017 | 0.455 | 0.02 | 1.512937 | 2.2889795 | 24.14749 | 0.007678 | 14.28 |

|        |      |       |      |          |           |          |          |       |
|--------|------|-------|------|----------|-----------|----------|----------|-------|
| 600667 | 2017 | -0.05 | 0.02 | 1.512937 | 2.2889795 | 23.54717 | 0.075764 | 36.09 |
| 600398 | 2017 | -0.96 | 0.02 | 1.512937 | 2.2889795 | 23.94607 | 0.297864 | 39.31 |
| 700    | 2017 | -0.66 | 0.02 | 1.512937 | 2.2889795 | 22.74249 | 0.050007 | 33.07 |
| 601218 | 2017 | -0.22 | 0.02 | 1.512937 | 2.2889795 | 22.07292 | 0.000773 | 36.49 |
| 2009   | 2017 | 0.721 | 0.02 | 1.512937 | 2.2889795 | 22.39502 | 0.042121 | 16.84 |
| 300450 | 2017 | -0.04 | 0.02 | 1.512937 | 2.2889795 | 22.61805 | 0.193178 | 37.61 |
| 700    | 2017 | -0.66 | 0.02 | 1.512937 | 2.2889795 | 22.74249 | 0.050007 | 33.07 |
| 600400 | 2017 | -0.31 | 0.02 | 1.512937 | 2.2889795 | 22.40816 | 0.132523 | 61.28 |
| 600475 | 2017 | 0.069 | 0.02 | 1.512937 | 2.2889795 | 22.65854 | 0.09221  | 72.11 |
| 600475 | 2017 | 0.069 | 0.02 | 1.512937 | 2.2889795 | 23.04008 | 0.09221  | 72.11 |
| 581    | 2017 | 0.059 | 0.02 | 1.512937 | 2.2889795 | 23.73048 | 0.172441 | 20.22 |
| 600667 | 2017 | -0.3  | 0.02 | 1.512937 | 2.2889795 | 23.54717 | 0.075764 | 36.09 |
| 700    | 2017 | -0.42 | 0.02 | 1.512937 | 2.2889795 | 22.74249 | 0.050007 | 33.07 |
| 2610   | 2017 | -0.57 | 0.02 | 1.512937 | 2.2889795 | 23.56134 | 0.019317 | 15.66 |
| 603090 | 2017 | 0.352 | 0.02 | 1.512937 | 2.2889795 | 20.21361 | 0.054898 | 54.68 |
| 300385 | 2017 | 0.229 | 0.02 | 1.512937 | 2.2889795 | 21.50912 | 0.064015 | 39.1  |
| 2778   | 2017 | 0.719 | 0.02 | 1.512937 | 2.2889795 | 20.41426 | 0.049571 | 37.67 |
| 2685   | 2017 | -0.36 | 0.02 | 1.512937 | 2.2889795 | 22.49834 | 0.037042 | 21.67 |
| 600398 | 2017 | -0.37 | 0.02 | 1.512937 | 2.2889795 | 23.94607 | 0.297864 | 39.31 |
| 600667 | 2017 | -0.3  | 0.02 | 1.512937 | 2.2889795 | 23.54717 | 0.075764 | 36.09 |
| 2395   | 2017 | 0.051 | 0.02 | 1.512937 | 2.2889795 | 20.98056 | 0.031891 | 64.73 |
| 600584 | 2017 | 0.403 | 0.02 | 1.512937 | 2.2889795 | 24.14749 | 0.007678 | 14.28 |
| 600667 | 2017 | -0.4  | 0.02 | 1.512937 | 2.2889795 | 23.54717 | 0.075764 | 36.09 |
| 2471   | 2017 | 0.083 | 0.02 | 1.512937 | 2.2889795 | 22.93843 | 0.039782 | 20    |
| 2471   | 2017 | -0.58 | 0.02 | 1.512937 | 2.2889795 | 22.93843 | 0.039782 | 20    |
| 2471   | 2017 | -0.58 | 0.02 | 1.512937 | 2.2889795 | 22.93843 | 0.039782 | 20    |
| 600370 | 2017 | -0.3  | 0.02 | 1.512937 | 2.2889795 | 21.28288 | 0.047086 | 50.33 |
| 2471   | 2017 | 0.745 | 0.02 | 1.512937 | 2.2889795 | 22.93843 | 0.039782 | 20    |
| 2471   | 2017 | 0.414 | 0.02 | 1.512937 | 2.2889795 | 22.93843 | 0.039782 | 20    |
| 2455   | 2017 | -0.61 | 0.02 | 1.512937 | 2.2889795 | 21.683   | 0.078936 | 31.78 |
| 2445   | 2017 | 0.296 | 0.02 | 1.512937 | 2.2889795 | 22.77327 | 0.067102 | 29.27 |
| 300337 | 2017 | 0.391 | 0.02 | 1.512937 | 2.2889795 | 21.71575 | 0.004799 | 34.44 |
| 603585 | 2017 | -0.4  | 0.02 | 1.512937 | 2.2889795 | 21.43608 | 0.164047 | 40    |
| 700    | 2017 | -0.32 | 0.02 | 1.512937 | 2.2889795 | 22.74249 | 0.050007 | 33.07 |
| 2455   | 2017 | -0.71 | 0.02 | 1.512937 | 2.2889795 | 21.683   | 0.078936 | 31.78 |
| 600475 | 2017 | -0.13 | 0.02 | 1.512937 | 2.2889795 | 23.04008 | 0.09221  | 72.11 |
| 2395   | 2017 | 0.051 | 0.02 | 1.512937 | 2.2889795 | 20.7319  | 0.031891 | 64.73 |
| 581    | 2017 | 0.054 | 0.02 | 1.512937 | 2.2889795 | 23.73048 | 0.172441 | 20.22 |
| 581    | 2017 | 0.361 | 0.02 | 1.512937 | 2.2889795 | 23.73048 | 0.172441 | 20.22 |
| 300385 | 2017 | 0.229 | 0.02 | 1.512937 | 2.2889795 | 21.50912 | 0.064015 | 39.1  |
| 584    | 2017 | 0.124 | 0.02 | 1.512937 | 2.2889795 | 21.58247 | 0.068494 | 18.6  |
| 300555 | 2017 | 0.385 | 0.02 | 1.512937 | 2.2889795 | 20.51764 | 0.072364 | 10.46 |
| 300450 | 2017 | -0.04 | 0.02 | 1.512937 | 2.2889795 | 22.61805 | 0.193178 | 37.61 |
| 600481 | 2017 | 0.857 | 0.02 | 1.512937 | 2.2889795 | 22.07228 | 0.044809 | 34.33 |
| 2610   | 2017 | -0.57 | 0.02 | 1.512937 | 2.2889795 | 23.56134 | 0.019317 | 15.66 |
| 600584 | 2017 | 0.73  | 0.02 | 1.512937 | 2.2889795 | 24.14749 | 0.007678 | 14.28 |
| 584    | 2017 | 0.034 | 0.02 | 1.512937 | 2.2889795 | 22.02494 | 0.068494 | 18.6  |
| 300279 | 2017 | 0.228 | 0.02 | 1.512937 | 2.2889795 | 21.90113 | 0.050606 | 21.56 |
| 936    | 2017 | 0.337 | 0.02 | 1.512937 | 2.2889795 | 23.13292 | 0.043809 | 44.2  |
| 600475 | 2017 | -0.32 | 0.02 | 1.512937 | 2.2889795 | 23.04008 | 0.09221  | 72.11 |
| 600475 | 2017 | -0.16 | 0.02 | 1.512937 | 2.2889795 | 23.04008 | 0.09221  | 72.11 |
| 600370 | 2017 | -0.3  | 0.02 | 1.512937 | 2.2889795 | 21.28288 | 0.047086 | 50.33 |
| 603028 | 2017 | 0.707 | 0.02 | 1.512937 | 2.2889795 | 20.68358 | 0.034942 | 28.91 |
| 600667 | 2017 | -0.3  | 0.02 | 1.512937 | 2.2889795 | 23.54717 | 0.075764 | 36.09 |

|        |      |       |      |          |           |          |          |       |
|--------|------|-------|------|----------|-----------|----------|----------|-------|
| 2685   | 2017 | -0.27 | 0.02 | 1.512937 | 2.2889795 | 22.49834 | 0.037042 | 21.67 |
| 300555 | 2017 | 0.489 | 0.02 | 1.512937 | 2.2889795 | 20.5223  | 0.072364 | 10.46 |
| 600220 | 2017 | -0.25 | 0.02 | 1.512937 | 2.2889795 | 22.27545 | 0.058655 | 8.448 |
| 600667 | 2017 | -0.3  | 0.02 | 1.512937 | 2.2889795 | 23.54717 | 0.075764 | 36.09 |
| 581    | 2017 | 0.059 | 0.02 | 1.512937 | 2.2889795 | 23.73048 | 0.172441 | 20.22 |
| 300555 | 2017 | 0.489 | 0.02 | 1.512937 | 2.2889795 | 20.5223  | 0.072364 | 10.46 |
| 890    | 2017 | -0.86 | 0.02 | 1.512937 | 2.2889795 | 22.99416 | 0.157544 | 21.07 |
| 2009   | 2017 | 0.721 | 0.02 | 1.512937 | 2.2889795 | 22.39502 | 0.042121 | 16.84 |
| 600398 | 2017 | -0.96 | 0.02 | 1.512937 | 2.2889795 | 23.94607 | 0.297864 | 39.31 |
| 600398 | 2017 | -0.96 | 0.02 | 1.512937 | 2.2889795 | 23.94607 | 0.297864 | 39.31 |
| 600400 | 2017 | -0.31 | 0.02 | 1.512937 | 2.2889795 | 22.41875 | 0.132523 | 61.28 |
| 2692   | 2017 | -0.36 | 0.02 | 1.512937 | 2.2889795 | 21.85842 | 0.04633  | 22.18 |
| 2009   | 2017 | 7E-04 | 0.02 | 1.512937 | 2.2889795 | 22.39502 | 0.042121 | 16.84 |
| 300337 | 2017 | -0.65 | 0.02 | 1.512937 | 2.2889795 | 21.71428 | 0.004799 | 34.44 |
| 300135 | 2017 | -0.13 | 0.02 | 1.512937 | 2.2889795 | 21.84358 | 0.029799 | 30.52 |
| 2471   | 2017 | -0.05 | 0.02 | 1.512937 | 2.2889795 | 22.93843 | 0.039782 | 20    |
| 2645   | 2017 | -0.57 | 0.02 | 1.512937 | 2.2889795 | 21.52775 | 0.072784 | 49.69 |
| 603416 | 2017 | 0.587 | 0.02 | 1.512937 | 2.2889795 | 20.84349 | 0.132955 | 35.1  |
| 2802   | 2017 | 0.223 | 0.02 | 1.512937 | 2.2889795 | 20.29723 | 0.119197 | 57.56 |
| 600475 | 2017 | -0.2  | 0.02 | 1.512937 | 2.2889795 | 23.04008 | 0.09221  | 72.11 |
| 581    | 2017 | 0.078 | 0.02 | 1.512937 | 2.2889795 | 23.73048 | 0.172441 | 20.22 |
| 300537 | 2017 | 0.733 | 0.02 | 1.512937 | 2.2889795 | 21.17158 | 0.049557 | 45.33 |
| 300279 | 2017 | 0.725 | 0.02 | 1.512937 | 2.2889795 | 21.75489 | 0.050606 | 21.56 |
| 2009   | 2017 | -0.32 | 0.02 | 1.512937 | 2.2889795 | 22.39502 | 0.042121 | 16.84 |
| 2455   | 2017 | -0.61 | 0.02 | 1.512937 | 2.2889795 | 21.683   | 0.078936 | 31.78 |
| 890    | 2017 | -0.19 | 0.02 | 1.512937 | 2.2889795 | 22.99416 | 0.157544 | 21.07 |
| 2471   | 2017 | -0.58 | 0.02 | 1.512937 | 2.2889795 | 22.93843 | 0.039782 | 20    |
| 600481 | 2017 | 0.592 | 0.02 | 1.512937 | 2.2889795 | 21.98264 | 0.044809 | 34.33 |
| 2395   | 2017 | 0.051 | 0.02 | 1.512937 | 2.2889795 | 20.98056 | 0.031891 | 64.73 |
| 300450 | 2017 | -0.04 | 0.02 | 1.512937 | 2.2889795 | 22.61805 | 0.193178 | 37.61 |
| 2685   | 2017 | -0.27 | 0.02 | 1.512937 | 2.2889795 | 22.49834 | 0.037042 | 21.67 |
| 300450 | 2017 | -0.01 | 0.02 | 1.512937 | 2.2889795 | 22.61805 | 0.193178 | 37.61 |
| 700    | 2017 | -0.42 | 0.02 | 1.512937 | 2.2889795 | 22.74249 | 0.050007 | 33.07 |
| 2009   | 2017 | -0.6  | 0.02 | 1.512937 | 2.2889795 | 22.39502 | 0.042121 | 16.84 |
| 600481 | 2017 | 0.109 | 0.02 | 1.512937 | 2.2889795 | 22.07228 | 0.044809 | 34.33 |
| 2009   | 2017 | -0.32 | 0.02 | 1.512937 | 2.2889795 | 22.39502 | 0.042121 | 16.84 |
| 936    | 2017 | 0.337 | 0.02 | 1.512937 | 2.2889795 | 23.10502 | 0.043809 | 44.2  |
| 300337 | 2017 | -0.65 | 0.02 | 1.512937 | 2.2889795 | 21.71428 | 0.004799 | 34.44 |
| 600667 | 2017 | -0.45 | 0.02 | 1.512937 | 2.2889795 | 23.54717 | 0.075764 | 36.09 |
| 600475 | 2017 | -0.2  | 0.02 | 1.512937 | 2.2889795 | 23.04008 | 0.09221  | 72.11 |
| 300337 | 2017 | 0.675 | 0.02 | 1.512937 | 2.2889795 | 21.71428 | 0.004799 | 34.44 |
| 2455   | 2017 | -0.31 | 0.02 | 1.512937 | 2.2889795 | 21.683   | 0.078936 | 31.78 |
| 600475 | 2017 | -0.53 | 0.02 | 1.512937 | 2.2889795 | 23.04008 | 0.09221  | 72.11 |
| 300385 | 2017 | -0.43 | 0.02 | 1.512937 | 2.2889795 | 21.50912 | 0.064015 | 39.1  |
| 300135 | 2017 | -0.21 | 0.02 | 1.512937 | 2.2889795 | 21.84358 | 0.029799 | 30.52 |
| 2455   | 2017 | -0.4  | 0.02 | 1.512937 | 2.2889795 | 21.02686 | 0.078936 | 31.78 |
| 738    | 2017 | 0.798 | 0.02 | 1.512937 | 2.2889795 | 22.69403 | 0.039874 | 23.34 |
| 2471   | 2017 | -0.12 | 0.02 | 1.512937 | 2.2889795 | 22.93843 | 0.039782 | 20    |
| 600370 | 2017 | -0.3  | 0.02 | 1.512937 | 2.2889795 | 20.87772 | 0.047086 | 50.33 |
| 2009   | 2017 | 7E-04 | 0.02 | 1.512937 | 2.2889795 | 22.39502 | 0.042121 | 16.84 |
| 600400 | 2017 | -0.31 | 0.02 | 1.512937 | 2.2889795 | 22.41875 | 0.132523 | 61.28 |
| 600475 | 2017 | -0.2  | 0.02 | 1.512937 | 2.2889795 | 23.04008 | 0.09221  | 72.11 |
| 581    | 2017 | -0.1  | 0.02 | 1.512937 | 2.2889795 | 23.73048 | 0.172441 | 20.22 |
| 2540   | 2017 | -0.07 | 0.02 | 1.512937 | 2.2889795 | 22.33458 | 0.06516  | 39.07 |

|        |      |       |      |          |           |          |          |       |
|--------|------|-------|------|----------|-----------|----------|----------|-------|
| 600584 | 2017 | 0.455 | 0.02 | 1.512937 | 2.2889795 | 24.14749 | 0.007678 | 14.28 |
| 2692   | 2017 | -0.36 | 0.02 | 1.512937 | 2.2889795 | 21.85842 | 0.04633  | 22.18 |
| 581    | 2017 | 0.771 | 0.02 | 1.512937 | 2.2889795 | 23.73048 | 0.172441 | 20.22 |
| 581    | 2017 | 0.059 | 0.02 | 1.512937 | 2.2889795 | 23.73048 | 0.172441 | 20.22 |
| 300135 | 2017 | -0.2  | 0.02 | 1.512937 | 2.2889795 | 21.84358 | 0.029799 | 30.52 |
| 2009   | 2017 | -0.29 | 0.02 | 1.512937 | 2.2889795 | 22.39502 | 0.042121 | 16.84 |
| 581    | 2017 | 0.059 | 0.02 | 1.512937 | 2.2889795 | 23.73048 | 0.172441 | 20.22 |
| 2610   | 2017 | -0.57 | 0.02 | 1.512937 | 2.2889795 | 23.2128  | 0.019317 | 15.66 |
| 601218 | 2017 | -0.22 | 0.02 | 1.512937 | 2.2889795 | 22.13894 | 0.000773 | 36.49 |
| 603090 | 2017 | -0.06 | 0.02 | 1.512937 | 2.2889795 | 20.1661  | 0.054898 | 54.68 |
| 600220 | 2017 | -0.25 | 0.02 | 1.512937 | 2.2889795 | 22.23265 | 0.058655 | 8.448 |
| 600220 | 2017 | -0.25 | 0.02 | 1.512937 | 2.2889795 | 22.27545 | 0.058655 | 8.448 |
| 300279 | 2017 | 0.725 | 0.02 | 1.512937 | 2.2889795 | 21.90113 | 0.050606 | 21.56 |
| 2009   | 2017 | -0.38 | 0.02 | 1.512937 | 2.2889795 | 22.39502 | 0.042121 | 16.84 |
| 603519 | 2017 | -0.25 | 0.02 | 1.512937 | 2.2889795 | 20.66843 | 0.11543  | 44.81 |
| 600475 | 2017 | 0.13  | 0.02 | 1.512937 | 2.2889795 | 23.04008 | 0.09221  | 72.11 |
| 603585 | 2017 | 0.17  | 0.02 | 1.512937 | 2.2889795 | 21.43608 | 0.164047 | 40    |
| 600667 | 2017 | -0.25 | 0.02 | 1.512937 | 2.2889795 | 23.54717 | 0.075764 | 36.09 |
| 2610   | 2017 | -0.57 | 0.02 | 1.512937 | 2.2889795 | 23.56134 | 0.019317 | 15.66 |
| 603090 | 2017 | -0.29 | 0.02 | 1.512937 | 2.2889795 | 20.21361 | 0.054898 | 54.68 |
| 600667 | 2017 | -0.25 | 0.02 | 1.512937 | 2.2889795 | 23.54717 | 0.075764 | 36.09 |
| 600481 | 2017 | 0.164 | 0.02 | 1.512937 | 2.2889795 | 22.07228 | 0.044809 | 34.33 |
| 2455   | 2017 | -0.26 | 0.02 | 1.512937 | 2.2889795 | 21.683   | 0.078936 | 31.78 |
| 2540   | 2017 | -0.17 | 0.02 | 1.512937 | 2.2889795 | 22.33458 | 0.06516  | 39.07 |
| 890    | 2017 | -0.33 | 0.02 | 1.512937 | 2.2889795 | 22.99416 | 0.157544 | 21.07 |
| 581    | 2017 | 0.395 | 0.02 | 1.512937 | 2.2889795 | 23.73048 | 0.172441 | 20.22 |
| 300031 | 2017 | 0.714 | 0.02 | 1.512937 | 2.2889795 | 21.88808 | 0.100654 | 22.75 |
| 300279 | 2017 | -0.6  | 0.02 | 1.512937 | 2.2889795 | 21.90113 | 0.050606 | 21.56 |
| 2471   | 2017 | -0.05 | 0.02 | 1.512937 | 2.2889795 | 22.93843 | 0.039782 | 20    |
| 890    | 2017 | -0.86 | 0.02 | 1.512937 | 2.2889795 | 22.99416 | 0.157544 | 21.07 |
| 584    | 2017 | 0.23  | 0.02 | 1.512937 | 2.2889795 | 22.02494 | 0.068494 | 18.6  |
| 584    | 2017 | 0.124 | 0.02 | 1.512937 | 2.2889795 | 22.02494 | 0.068494 | 18.6  |
| 603028 | 2017 | 0.707 | 0.02 | 1.512937 | 2.2889795 | 20.54666 | 0.034942 | 28.91 |
| 700    | 2017 | -0.66 | 0.02 | 1.512937 | 2.2889795 | 22.74249 | 0.050007 | 33.07 |
| 603585 | 2017 | 0.084 | 0.02 | 1.512937 | 2.2889795 | 20.81968 | 0.164047 | 40    |
| 300279 | 2017 | 0.725 | 0.02 | 1.512937 | 2.2889795 | 21.90113 | 0.050606 | 21.56 |
| 700    | 2017 | 0.669 | 0.02 | 1.512937 | 2.2889795 | 22.74249 | 0.050007 | 33.07 |
| 700    | 2017 | -0.66 | 0.02 | 1.512937 | 2.2889795 | 22.74249 | 0.050007 | 33.07 |
| 300135 | 2017 | -0.21 | 0.02 | 1.512937 | 2.2889795 | 21.63218 | 0.029799 | 30.52 |
| 600422 | 2017 | 0.142 | 0    | 1.464256 | 2.1440451 | 22.56986 | 0.088848 | 29.79 |
| 960    | 2017 | 0.033 | 0    | 1.464256 | 2.1440451 | 24.14273 | 0.073173 | 32.52 |
| 960    | 2017 | 0.486 | 0    | 1.464256 | 2.1440451 | 24.14273 | 0.073173 | 32.52 |
| 878    | 2017 | -0.47 | 0    | 1.464256 | 2.1440451 | 24.1852  | 0.03928  | 45.01 |
| 878    | 2017 | -0.68 | 0    | 1.464256 | 2.1440451 | 23.7356  | 0.03928  | 45.01 |
| 960    | 2017 | -0.18 | 0    | 1.464256 | 2.1440451 | 24.14273 | 0.073173 | 32.52 |
| 2053   | 2017 | -0.49 | 0    | 1.464256 | 2.1440451 | 22.03868 | 0.064339 | 35.27 |
| 600096 | 2017 | -0.2  | 0    | 1.464256 | 2.1440451 | 24.8752  | 0.05154  | 46.7  |
| 600422 | 2017 | -0.27 | 0    | 1.464256 | 2.1440451 | 22.56986 | 0.088848 | 29.79 |
| 948    | 2017 | 0.615 | 0    | 1.464256 | 2.1440451 | 21.67986 | 0.01498  | 26.88 |
| 600422 | 2017 | 0.489 | 0    | 1.464256 | 2.1440451 | 22.56986 | 0.088848 | 29.79 |
| 903    | 2017 | -0.57 | 0    | 1.464256 | 2.1440451 | 23.05807 | 0.047736 | 32.99 |
| 960    | 2017 | 0.045 | 0    | 1.464256 | 2.1440451 | 24.14273 | 0.073173 | 32.52 |
| 600422 | 2017 | -0.17 | 0    | 1.464256 | 2.1440451 | 22.56986 | 0.088848 | 29.79 |
| 878    | 2017 | -0.68 | 0    | 1.464256 | 2.1440451 | 24.1852  | 0.03928  | 45.01 |

|        |      |       |   |          |           |          |          |       |
|--------|------|-------|---|----------|-----------|----------|----------|-------|
| 600096 | 2017 | -0.53 | 0 | 1.464256 | 2.14E+00  | 24.8752  | 0.05154  | 46.7  |
| 300505 | 2017 | 0.589 | 0 | 1.464256 | 2.14E+00  | 20.60749 | 0.090797 | 44.32 |
| 600422 | 2017 | 0.489 | 0 | 1.464256 | 2.14E+00  | 22.56986 | 0.088848 | 29.79 |
| 960    | 2017 | 0.045 | 0 | 1.464256 | 2.14E+00  | 24.14273 | 0.073173 | 32.52 |
| 878    | 2017 | 0.177 | 0 | 1.464256 | 2.14E+00  | 24.1852  | 0.03928  | 45.01 |
| 600422 | 2017 | -0.17 | 0 | 1.464256 | 2.1440451 | 22.56986 | 0.088848 | 29.79 |
| 878    | 2017 | -0.68 | 0 | 1.464256 | 2.1440451 | 24.1852  | 0.03928  | 45.01 |
| 948    | 2017 | 0.615 | 0 | 1.464256 | 2.1440451 | 21.74395 | 0.01498  | 26.88 |
| 878    | 2017 | 0.177 | 0 | 1.464256 | 2.1440451 | 24.1852  | 0.03928  | 45.01 |
| 600459 | 2017 | 0.423 | 0 | 1.464256 | 2.1440451 | 22.37825 | 0.063685 | 39.34 |
| 600459 | 2017 | 0.953 | 0 | 1.464256 | 2.1440451 | 22.37825 | 0.063685 | 39.34 |
| 538    | 2017 | 0.358 | 0 | 1.464256 | 2.1440451 | 24.04479 | 0.172659 | 41.52 |
| 878    | 2017 | -0.72 | 0 | 1.464256 | 2.1440451 | 24.1852  | 0.03928  | 45.01 |
| 600792 | 2017 | 0.489 | 0 | 1.464256 | 2.1440451 | 22.38497 | -0.01341 | 60.19 |
| 600096 | 2017 | -0.3  | 0 | 1.464256 | 2.1440451 | 24.8752  | 0.05154  | 46.7  |
| 600096 | 2017 | 0.383 | 0 | 1.464256 | 2.1440451 | 24.8752  | 0.05154  | 46.7  |
| 2265   | 2017 | -0.07 | 0 | 1.464256 | 2.1440451 | 21.10646 | 0.019295 | 40.89 |
| 807    | 2017 | 0.283 | 0 | 1.464256 | 2.1440451 | 24.30337 | 0.065546 | 42.57 |
| 2053   | 2017 | -0.49 | 0 | 1.464256 | 2.1440451 | 22.03868 | 0.064339 | 35.27 |
| 600096 | 2017 | -0.08 | 0 | 1.464256 | 2.1440451 | 24.8752  | 0.05154  | 46.7  |
| 2750   | 2017 | 1.081 | 0 | 1.464256 | 2.1440451 | 20.48149 | 0.054465 | 43.82 |
| 600792 | 2017 | -0.68 | 0 | 1.464256 | 2.1440451 | 22.38497 | -0.01341 | 60.19 |
| 600096 | 2017 | 0.383 | 0 | 1.464256 | 2.1440451 | 24.8752  | 0.05154  | 46.7  |
| 600422 | 2017 | -0.57 | 0 | 1.464256 | 2.1440451 | 22.56986 | 0.088848 | 29.79 |
| 600096 | 2017 | -0.61 | 0 | 1.464256 | 2.1440451 | 24.8752  | 0.05154  | 46.7  |
| 538    | 2017 | 0.479 | 0 | 1.464256 | 2.1440451 | 24.04479 | 0.172659 | 41.52 |
| 600459 | 2017 | 0.953 | 0 | 1.464256 | 2.1440451 | 22.37825 | 0.063685 | 39.34 |
| 538    | 2017 | -0.85 | 0 | 1.464256 | 2.1440451 | 24.04479 | 0.172659 | 41.52 |
| 948    | 2017 | 0.615 | 0 | 1.464256 | 2.1440451 | 21.74395 | 0.01498  | 26.88 |
| 538    | 2017 | 0.358 | 0 | 1.464256 | 2.1440451 | 23.67786 | 0.172659 | 41.52 |
| 878    | 2017 | -0.44 | 0 | 1.464256 | 2.1440451 | 24.1852  | 0.03928  | 45.01 |
| 300142 | 2017 | 0.522 | 0 | 1.464256 | 2.1440451 | 22.49414 | -0.15692 | 12.99 |
| 878    | 2017 | 7E-04 | 0 | 1.464256 | 2.1440451 | 24.1852  | 0.03928  | 45.01 |
| 2265   | 2017 | -0.22 | 0 | 1.464256 | 2.1440451 | 20.93215 | 0.019295 | 40.89 |
| 600422 | 2017 | -0.17 | 0 | 1.464256 | 2.1440451 | 22.20529 | 0.088848 | 29.79 |
| 807    | 2017 | -0.68 | 0 | 1.464256 | 2.1440451 | 24.30337 | 0.065546 | 42.57 |
| 807    | 2017 | 0.644 | 0 | 1.464256 | 2.1440451 | 24.30337 | 0.065546 | 42.57 |
| 903    | 2017 | -0.52 | 0 | 1.464256 | 2.1440451 | 23.10153 | 0.047736 | 32.99 |
| 807    | 2017 | -0.35 | 0 | 1.464256 | 2.1440451 | 24.30337 | 0.065546 | 42.57 |
| 807    | 2017 | -0.06 | 0 | 1.464256 | 2.1440451 | 24.30337 | 0.065546 | 42.57 |
| 600096 | 2017 | -0.53 | 0 | 1.464256 | 2.1440451 | 24.8752  | 0.05154  | 46.7  |
| 600422 | 2017 | -0.17 | 0 | 1.464256 | 2.1440451 | 22.56986 | 0.088848 | 29.79 |
| 807    | 2017 | 0.644 | 0 | 1.464256 | 2.1440451 | 24.30337 | 0.065546 | 42.57 |
| 960    | 2017 | 0.486 | 0 | 1.464256 | 2.1440451 | 24.14273 | 0.073173 | 32.52 |
| 600792 | 2017 | 0.489 | 0 | 1.464256 | 2.1440451 | 22.38497 | -0.01341 | 60.19 |
| 2053   | 2017 | -0.49 | 0 | 1.464256 | 2.1440451 | 22.03868 | 0.064339 | 35.27 |
| 600422 | 2017 | 0.489 | 0 | 1.464256 | 2.1440451 | 22.56986 | 0.088848 | 29.79 |
| 600792 | 2017 | -0.68 | 0 | 1.464256 | 2.1440451 | 22.38497 | -0.01341 | 60.19 |
| 2750   | 2017 | 0.585 | 0 | 1.464256 | 2.14E+00  | 20.48188 | 0.054465 | 43.82 |
| 2265   | 2017 | -0.07 | 0 | 1.464256 | 2.14E+00  | 21.10646 | 0.019295 | 40.89 |
| 948    | 2017 | 0.615 | 0 | 1.464256 | 2.14E+00  | 21.74395 | 0.01498  | 26.88 |
| 538    | 2017 | 0.358 | 0 | 1.464256 | 2.14E+00  | 24.04479 | 0.172659 | 41.52 |
| 600422 | 2017 | -0.17 | 0 | 1.464256 | 2.14E+00  | 22.56986 | 0.088848 | 29.79 |
| 600792 | 2017 | -0.68 | 0 | 1.464256 | 2.1440451 | 22.38497 | -0.01341 | 60.19 |



|        |      |       |   |          |           |          |          |       |
|--------|------|-------|---|----------|-----------|----------|----------|-------|
| 600459 | 2017 | 0.953 | 0 | 1.464256 | 2.1440451 | 22.37825 | 0.063685 | 39.34 |
| 948    | 2017 | 0.615 | 0 | 1.464256 | 2.1440451 | 21.74395 | 0.01498  | 26.88 |
| 538    | 2017 | -0.48 | 0 | 1.464256 | 2.1440451 | 24.04479 | 0.172659 | 41.52 |
| 807    | 2017 | 0.283 | 0 | 1.464256 | 2.1440451 | 24.30337 | 0.065546 | 42.57 |
| 948    | 2017 | 0.615 | 0 | 1.464256 | 2.1440451 | 21.74395 | 0.01498  | 26.88 |
| 2750   | 2017 | -0.24 | 0 | 1.464256 | 2.1440451 | 20.48149 | 0.054465 | 43.82 |
| 600459 | 2017 | 0.622 | 0 | 1.464256 | 2.1440451 | 22.37825 | 0.063685 | 39.34 |
| 2265   | 2017 | -0.6  | 0 | 1.464256 | 2.1440451 | 21.10646 | 0.019295 | 40.89 |
| 878    | 2017 | -0.48 | 0 | 1.464256 | 2.1440451 | 24.1852  | 0.03928  | 45.01 |
| 600096 | 2017 | -0.28 | 0 | 1.464256 | 2.1440451 | 24.8752  | 0.05154  | 46.7  |
| 903    | 2017 | -0.57 | 0 | 1.464256 | 2.1440451 | 23.10153 | 0.047736 | 32.99 |
| 960    | 2017 | -0.03 | 0 | 1.464256 | 2.1440451 | 24.14273 | 0.073173 | 32.52 |
| 538    | 2017 | -0.08 | 0 | 1.464256 | 2.1440451 | 24.04479 | 0.172659 | 41.52 |
| 600422 | 2017 | -0.2  | 0 | 1.464256 | 2.1440451 | 22.56986 | 0.088848 | 29.79 |
| 600422 | 2017 | -0.17 | 0 | 1.464256 | 2.1440451 | 22.56986 | 0.088848 | 29.79 |
| 2265   | 2017 | -0.6  | 0 | 1.464256 | 2.1440451 | 21.10646 | 0.019295 | 40.89 |
| 948    | 2017 | 0.615 | 0 | 1.464256 | 2.1440451 | 21.74395 | 0.01498  | 26.88 |
| 538    | 2017 | -0.18 | 0 | 1.464256 | 2.1440451 | 24.04479 | 0.172659 | 41.52 |
| 600459 | 2017 | 0.953 | 0 | 1.464256 | 2.1440451 | 22.16326 | 0.063685 | 39.34 |
| 2053   | 2017 | -0.49 | 0 | 1.464256 | 2.1440451 | 22.03868 | 0.064339 | 35.27 |
| 807    | 2017 | 0.291 | 0 | 1.464256 | 2.1440451 | 24.30337 | 0.065546 | 42.57 |
| 600096 | 2017 | 0.383 | 0 | 1.464256 | 2.1440451 | 24.8752  | 0.05154  | 46.7  |
| 300142 | 2017 | 0.522 | 0 | 1.464256 | 2.1440451 | 22.49414 | -0.15692 | 12.99 |
| 807    | 2017 | 0.283 | 0 | 1.464256 | 2.1440451 | 24.30337 | 0.065546 | 42.57 |
| 960    | 2017 | -0.29 | 0 | 1.464256 | 2.1440451 | 24.14273 | 0.073173 | 32.52 |
| 600422 | 2017 | -0.17 | 0 | 1.464256 | 2.1440451 | 22.56986 | 0.088848 | 29.79 |
| 538    | 2017 | -0.11 | 0 | 1.464256 | 2.1440451 | 24.04479 | 0.172659 | 41.52 |
| 300142 | 2017 | 0.522 | 0 | 1.464256 | 2.1440451 | 22.49414 | -0.15692 | 12.99 |
| 807    | 2017 | 0.115 | 0 | 1.464256 | 2.1440451 | 24.30337 | 0.065546 | 42.57 |
| 600422 | 2017 | 0.489 | 0 | 1.464256 | 2.1440451 | 22.56986 | 0.088848 | 29.79 |
| 300142 | 2017 | 1.847 | 0 | 1.464256 | 2.1440451 | 22.49414 | -0.15692 | 12.99 |
| 807    | 2017 | -0.09 | 0 | 1.464256 | 2.1440451 | 24.30337 | 0.065546 | 42.57 |
| 538    | 2017 | -0.85 | 0 | 1.464256 | 2.1440451 | 24.04479 | 0.172659 | 41.52 |
| 300142 | 2017 | 1.019 | 0 | 1.464256 | 2.1440451 | 22.49414 | -0.15692 | 12.99 |
| 903    | 2017 | -0.37 | 0 | 1.464256 | 2.1440451 | 23.10153 | 0.047736 | 32.99 |
| 600792 | 2017 | -0.65 | 0 | 1.464256 | 2.1440451 | 22.35237 | -0.01341 | 60.19 |
| 948    | 2017 | 0.615 | 0 | 1.464256 | 2.1440451 | 21.74395 | 0.01498  | 26.88 |
| 600422 | 2017 | -0.17 | 0 | 1.464256 | 2.1440451 | 22.56986 | 0.088848 | 29.79 |
| 960    | 2017 | 0.005 | 0 | 1.464256 | 2.1440451 | 24.14273 | 0.073173 | 32.52 |
| 948    | 2017 | 0.615 | 0 | 1.464256 | 2.1440451 | 21.74395 | 0.01498  | 26.88 |
| 300142 | 2017 | 1.847 | 0 | 1.464256 | 2.1440451 | 22.49414 | -0.15692 | 12.99 |
| 538    | 2017 | 0.358 | 0 | 1.464256 | 2.1440451 | 24.04479 | 0.172659 | 41.52 |
| 948    | 2017 | 0.615 | 0 | 1.464256 | 2.1440451 | 21.74395 | 0.01498  | 26.88 |
| 807    | 2017 | -0.35 | 0 | 1.464256 | 2.1440451 | 24.30337 | 0.065546 | 42.57 |
| 878    | 2017 | -0.68 | 0 | 1.464256 | 2.1440451 | 24.1852  | 0.03928  | 45.01 |
| 300142 | 2017 | 0.522 | 0 | 1.464256 | 2.1440451 | 22.49414 | -0.15692 | 12.99 |
| 600096 | 2017 | 0.383 | 0 | 1.464256 | 2.1440451 | 24.8752  | 0.05154  | 46.7  |
| 600459 | 2017 | 0.788 | 0 | 1.464256 | 2.1440451 | 22.37825 | 0.063685 | 39.34 |
| 878    | 2017 | -0.68 | 0 | 1.464256 | 2.1440451 | 24.1852  | 0.03928  | 45.01 |
| 807    | 2017 | -0.68 | 0 | 1.464256 | 2.1440451 | 24.30337 | 0.065546 | 42.57 |
| 878    | 2017 | 0.442 | 0 | 1.464256 | 2.1440451 | 24.1852  | 0.03928  | 45.01 |
| 807    | 2017 | 0.283 | 0 | 1.464256 | 2.1440451 | 24.30337 | 0.065546 | 42.57 |
| 960    | 2017 | -0.18 | 0 | 1.464256 | 2.1440451 | 24.14273 | 0.073173 | 32.52 |
| 960    | 2017 | 0.486 | 0 | 1.464256 | 2.1440451 | 24.14273 | 0.073173 | 32.52 |

|        |      |       |      |          |            |          |          |       |
|--------|------|-------|------|----------|------------|----------|----------|-------|
| 807    | 2017 | -0.3  | 0    | 1.464256 | 2.1440451  | 23.70273 | 0.065546 | 42.57 |
| 960    | 2017 | 0.486 | 0    | 1.464256 | 2.1440451  | 24.01628 | 0.073173 | 32.52 |
| 600096 | 2017 | -0.94 | 0    | 1.464256 | 2.1440451  | 24.8752  | 0.05154  | 46.7  |
| 300142 | 2017 | 0.522 | 0    | 1.464256 | 2.1440451  | 22.1017  | -0.15692 | 12.99 |
| 878    | 2017 | -0.72 | 0    | 1.464256 | 2.1440451  | 24.1852  | 0.03928  | 45.01 |
| 948    | 2017 | 0.615 | 0    | 1.464256 | 2.1440451  | 21.74395 | 0.01498  | 26.88 |
| 878    | 2017 | -0.76 | 0    | 1.464256 | 2.1440451  | 24.1852  | 0.03928  | 45.01 |
| 903    | 2017 | -0.4  | 0    | 1.464256 | 2.1440451  | 23.10153 | 0.047736 | 32.99 |
| 600792 | 2017 | -0.69 | 0    | 1.464256 | 2.1440451  | 22.38497 | -0.01341 | 60.19 |
| 538    | 2017 | 0.358 | 0    | 1.464256 | 2.1440451  | 24.04479 | 0.172659 | 41.52 |
| 2053   | 2017 | -0.49 | 0    | 1.464256 | 2.1440451  | 21.5608  | 0.064339 | 35.27 |
| 600096 | 2017 | 0.383 | 0    | 1.464256 | 2.1440451  | 23.99362 | 0.05154  | 46.7  |
| 300142 | 2017 | 0.522 | 0    | 1.464256 | 2.1440451  | 22.49414 | -0.15692 | 12.99 |
| 807    | 2017 | -0.35 | 0    | 1.464256 | 2.1440451  | 24.30337 | 0.065546 | 42.57 |
| 2750   | 2017 | 1.081 | 0    | 1.464256 | 2.1440451  | 20.48149 | 0.054465 | 43.82 |
| 903    | 2017 | -0.7  | 0    | 1.464256 | 2.1440451  | 23.10153 | 0.047736 | 32.99 |
| 948    | 2017 | 0.615 | 0    | 1.464256 | 2.1440451  | 21.74395 | 0.01498  | 26.88 |
| 300505 | 2017 | 0.589 | 0    | 1.464256 | 2.1440451  | 20.62715 | 0.090797 | 44.32 |
| 878    | 2017 | -0.09 | 0    | 1.464256 | 2.1440451  | 24.1852  | 0.03928  | 45.01 |
| 538    | 2017 | 0.479 | 0    | 1.464256 | 2.1440451  | 24.04479 | 0.172659 | 41.52 |
| 300505 | 2017 | 0.589 | 0    | 1.464256 | 2.1440451  | 20.60749 | 0.090797 | 44.32 |
| 2750   | 2017 | -0.24 | 0    | 1.464256 | 2.1440451  | 20.48149 | 0.054465 | 43.82 |
| 600737 | 2017 | -0.85 | 0.01 | 0.03036  | 0.00092176 | 23.56249 | 0.103163 | 51.53 |
| 600737 | 2017 | -0.85 | 0.01 | 0.03036  | 0.00092176 | 23.56249 | 0.103163 | 51.53 |
| 600089 | 2017 | -0.4  | 0.01 | 0.03036  | 0.00092176 | 25.14928 | 0.077662 | 12.02 |
| 600089 | 2017 | -0.66 | 0.01 | 0.03036  | 0.00092176 | 24.30968 | 0.077662 | 12.02 |
| 600089 | 2017 | -0.37 | 0.01 | 0.03036  | 0.00092176 | 25.14928 | 0.077662 | 12.02 |
| 600089 | 2017 | -0.73 | 0.01 | 0.03036  | 0.00092176 | 25.14928 | 0.077662 | 12.02 |
| 600089 | 2017 | -0.58 | 0.01 | 0.03036  | 0.00092176 | 25.14928 | 0.077662 | 12.02 |
| 600089 | 2017 | -0.64 | 0.01 | 0.03036  | 0.00092176 | 25.14928 | 0.077662 | 12.02 |
| 600089 | 2017 | -0.16 | 0.01 | 0.03036  | 0.00092176 | 25.14928 | 0.077662 | 12.02 |
| 600089 | 2017 | -0.64 | 0.01 | 0.03036  | 0.00092176 | 25.14928 | 0.077662 | 12.02 |
| 300313 | 2017 | -0.75 | 0.01 | 0.03036  | 0.00092176 | 20.35358 | 0.017674 | 29.1  |
| 600737 | 2017 | -0.85 | 0.01 | 0.03036  | 0.00092176 | 23.42085 | 0.103163 | 51.53 |
| 600089 | 2017 | -0.29 | 0.01 | 0.03036  | 0.00092176 | 25.14928 | 0.077662 | 12.02 |
| 600737 | 2017 | -0.85 | 0.01 | 0.03036  | 0.00092176 | 23.56249 | 0.103163 | 51.53 |
| 600737 | 2017 | -0.85 | 0.01 | 0.03036  | 0.00092176 | 23.56249 | 0.103163 | 51.53 |
| 300313 | 2017 | -0.75 | 0.01 | 0.03036  | 0.00092176 | 20.35358 | 0.017674 | 29.1  |
| 600089 | 2017 | 0.085 | 0.01 | 0.03036  | 0.00092176 | 25.14928 | 0.077662 | 12.02 |
| 300313 | 2017 | -0.75 | 0.01 | 0.03036  | 0.00092176 | 20.35358 | 0.017674 | 29.1  |
| 600089 | 2017 | 0.015 | 0.01 | 0.03036  | 0.00092176 | 25.14928 | 0.077662 | 12.02 |
| 600089 | 2017 | -0.39 | 0.01 | 0.03036  | 0.00092176 | 25.14928 | 0.077662 | 12.02 |
| 300313 | 2017 | -0.75 | 0.01 | 0.03036  | 0.00092176 | 20.43824 | 0.017674 | 29.1  |
| 600089 | 2017 | -0.58 | 0.01 | 0.03036  | 0.00092176 | 25.14928 | 0.077662 | 12.02 |
| 300313 | 2017 | -0.75 | 0.01 | 0.03036  | 0.00092176 | 20.35358 | 0.017674 | 29.1  |
| 600089 | 2017 | -0.35 | 0.01 | 0.03036  | 0.00092176 | 25.14928 | 0.077662 | 12.02 |
| 600089 | 2017 | -0.73 | 0.01 | 0.03036  | 0.00092176 | 25.14928 | 0.077662 | 12.02 |
| 600737 | 2017 | -0.85 | 0.01 | 0.03036  | 0.00092176 | 23.56249 | 0.103163 | 51.53 |
| 600089 | 2017 | 0.085 | 0.01 | 0.03036  | 0.00092176 | 25.14928 | 0.077662 | 12.02 |
| 600089 | 2017 | -0.73 | 0.01 | 0.03036  | 0.00092176 | 25.14928 | 0.077662 | 12.02 |
| 600089 | 2017 | -0.59 | 0.01 | 0.03036  | 0.00092176 | 25.14928 | 0.077662 | 12.02 |
| 600157 | 2017 | -0.94 | 0    | 0.928565 | 0.86223387 | 24.73459 | 0.03012  | 32.41 |
| 600157 | 2017 | -0.94 | 0    | 0.928565 | 0.86223387 | 25.39771 | 0.03012  | 32.41 |
| 600157 | 2017 | -0.94 | 0    | 0.928565 | 0.86223387 | 25.39771 | 0.03012  | 32.41 |

|        |      |       |      |          |            |          |          |       |
|--------|------|-------|------|----------|------------|----------|----------|-------|
| 600157 | 2017 | -0.94 | 0    | 0.928565 | 0.86223387 | 25.39771 | 0.03012  | 32.41 |
| 600123 | 2017 | -0.73 | 0    | 0.095006 | 0.00902606 | 23.88293 | 0.061636 | 45.11 |
| 600123 | 2017 | -0.73 | 0    | 0.095006 | 0.00902606 | 23.88293 | 0.061636 | 45.11 |
| 600123 | 2017 | -0.73 | 0    | 0.095006 | 0.00902606 | 23.77619 | 0.061636 | 45.11 |
| 404    | 2017 | -0.22 | 0.03 | 1.556745 | 2.4234553  | 23.02367 | 0.053524 | 28.95 |
| 2068   | 2017 | -0.66 | 0.03 | 1.556745 | 2.4234553  | 22.73356 | 0.147664 | 39.69 |
| 2068   | 2017 | -0.46 | 0.03 | 1.556745 | 2.4234553  | 22.73356 | 0.147664 | 39.69 |
| 2068   | 2017 | -0.66 | 0.03 | 1.556745 | 2.4234553  | 22.73356 | 0.147664 | 39.69 |
| 300497 | 2017 | 0.748 | 0.03 | 1.556745 | 2.4234553  | 21.30515 | 0.180486 | 33.78 |
| 404    | 2017 | 0.662 | 0.03 | 1.556745 | 2.4234553  | 23.02367 | 0.053524 | 28.95 |
| 2068   | 2017 | -0.54 | 0.03 | 1.556745 | 2.4234553  | 22.73356 | 0.147664 | 39.69 |
| 2068   | 2017 | 0.664 | 0.03 | 1.556745 | 2.4234553  | 22.73356 | 0.147664 | 39.69 |
| 404    | 2017 | -0.66 | 0.03 | 1.556745 | 2.4234553  | 23.02367 | 0.053524 | 28.95 |
| 404    | 2017 | -0.03 | 0.03 | 1.556745 | 2.4234553  | 23.02367 | 0.053524 | 28.95 |
| 300497 | 2017 | 0.748 | 0.03 | 1.556745 | 2.4234553  | 21.30515 | 0.180486 | 33.78 |
| 404    | 2017 | -0    | 0.03 | 1.556745 | 2.4234553  | 23.02367 | 0.053524 | 28.95 |
| 404    | 2017 | -0.66 | 0.03 | 1.556745 | 2.4234553  | 23.02367 | 0.053524 | 28.95 |
| 404    | 2017 | -0.08 | 0.03 | 1.556745 | 2.4234553  | 23.02367 | 0.053524 | 28.95 |
| 2068   | 2017 | -0.54 | 0.03 | 1.556745 | 2.4234553  | 22.73356 | 0.147664 | 39.69 |
| 300497 | 2017 | 0.748 | 0.03 | 1.556745 | 2.4234553  | 21.30515 | 0.180486 | 33.78 |
| 404    | 2017 | -0.33 | 0.03 | 1.556745 | 2.4234553  | 23.02367 | 0.053524 | 28.95 |
| 2068   | 2017 | -0.39 | 0.03 | 1.556745 | 2.4234553  | 22.73356 | 0.147664 | 39.69 |
| 404    | 2017 | -0.08 | 0.03 | 1.556745 | 2.4234553  | 23.02367 | 0.053524 | 28.95 |
| 2068   | 2017 | -0.44 | 0.03 | 1.556745 | 2.4234553  | 22.73356 | 0.147664 | 39.69 |
| 2068   | 2017 | 0.001 | 0.03 | 1.556745 | 2.4234553  | 22.4718  | 0.147664 | 39.69 |
| 404    | 2017 | -0.03 | 0.03 | 1.556745 | 2.4234553  | 23.02367 | 0.053524 | 28.95 |
| 2068   | 2017 | -0.66 | 0.03 | 1.556745 | 2.4234553  | 22.73356 | 0.147664 | 39.69 |
| 2068   | 2017 | -0.66 | 0.03 | 1.556745 | 2.4234553  | 22.73356 | 0.147664 | 39.69 |
| 300497 | 2017 | 0.748 | 0.03 | 1.556745 | 2.4234553  | 21.16779 | 0.180486 | 33.78 |
| 300497 | 2017 | 0.748 | 0.03 | 1.556745 | 2.4234553  | 21.30515 | 0.180486 | 33.78 |
| 2068   | 2017 | -0.66 | 0.03 | 1.556745 | 2.4234553  | 22.73356 | 0.147664 | 39.69 |
| 2068   | 2017 | -0.44 | 0.03 | 1.556745 | 2.4234553  | 22.73356 | 0.147664 | 39.69 |
| 404    | 2017 | -0.66 | 0.03 | 1.556745 | 2.4234553  | 22.36453 | 0.053524 | 28.95 |
| 2114   | 2017 | -0.4  | 0    | 1.100463 | 1.2110179  | 21.57995 | 0.030226 | 27.4  |
| 2114   | 2017 | -0.4  | 0    | 1.100463 | 1.2110179  | 21.57995 | 0.030226 | 27.4  |
| 600497 | 2017 | 0.533 | 0    | 1.100463 | 1.2110179  | 24.21379 | 0.069843 | 38.19 |
| 600497 | 2017 | -0.34 | 0    | 1.100463 | 1.2110179  | 24.21379 | 0.069843 | 38.19 |
| 600497 | 2017 | -0.26 | 0    | 1.100463 | 1.2110179  | 24.21379 | 0.069843 | 38.19 |
| 600497 | 2017 | -0.35 | 0    | 1.100463 | 1.2110179  | 24.21379 | 0.069843 | 38.19 |
| 600497 | 2017 | -0.66 | 0    | 1.100463 | 1.2110179  | 24.21379 | 0.069843 | 38.19 |
| 2114   | 2017 | -0.4  | 0    | 1.100463 | 1.2110179  | 21.57381 | 0.030226 | 27.4  |
| 600497 | 2017 | -0.79 | 0    | 1.100463 | 1.2110179  | 24.21379 | 0.069843 | 38.19 |
| 600497 | 2017 | -0.44 | 0    | 1.100463 | 1.2110179  | 24.21379 | 0.069843 | 38.19 |
| 600497 | 2017 | -0.44 | 0    | 1.100463 | 1.2110179  | 24.21379 | 0.069843 | 38.19 |
| 600497 | 2017 | -0.57 | 0    | 1.100463 | 1.2110179  | 24.21379 | 0.069843 | 38.19 |
| 600497 | 2017 | 0.533 | 0    | 1.100463 | 1.2110179  | 24.21379 | 0.069843 | 38.19 |
| 600497 | 2017 | -0.41 | 0    | 1.100463 | 1.2110179  | 24.21379 | 0.069843 | 38.19 |
| 600497 | 2017 | -0.44 | 0    | 1.100463 | 1.2110179  | 24.21379 | 0.069843 | 38.19 |
| 600497 | 2017 | -0.41 | 0    | 1.100463 | 1.2110179  | 24.21379 | 0.069843 | 38.19 |
| 2114   | 2017 | -0.4  | 0    | 1.100463 | 1.2110179  | 21.57995 | 0.030226 | 27.4  |
| 2114   | 2017 | -0.4  | 0    | 1.100463 | 1.2110179  | 21.57995 | 0.030226 | 27.4  |
| 600497 | 2017 | -0.35 | 0    | 1.100463 | 1.2110179  | 24.21379 | 0.069843 | 38.19 |
| 600497 | 2017 | 0.533 | 0    | 1.100463 | 1.2110179  | 24.01483 | 0.069843 | 38.19 |
| 761    | 2017 | -0.16 | 0    | 1.209984 | 1.464062   | 24.86637 | 0.108383 | 72.84 |

|        |      |       |      |          |            |          |          |       |
|--------|------|-------|------|----------|------------|----------|----------|-------|
| 761    | 2017 | -0.16 | 0    | 1.209984 | 1.464062   | 24.86637 | 0.108383 | 72.84 |
| 761    | 2017 | -0.16 | 0    | 1.209984 | 1.464062   | 24.86637 | 0.108383 | 72.84 |
| 761    | 2017 | -0.16 | 0    | 1.209984 | 1.464062   | 24.80692 | 0.108383 | 72.84 |
| 761    | 2017 | -0.16 | 0    | 1.209984 | 1.464062   | 24.86637 | 0.108383 | 72.84 |
| 600570 | 2017 | 2.129 | 0.05 | 0.814667 | 0.66368197 | 22.49008 | 0.131869 | 20.72 |
| 600460 | 2017 | 0.662 | 0.05 | 0.814667 | 0.66368197 | 22.55655 | 0.032368 | 41.17 |
| 300203 | 2017 | -0.09 | 0.05 | 0.814667 | 0.66368197 | 22.57612 | 0.144501 | 24.65 |
| 603823 | 2017 | 0.126 | 0.05 | 0.814667 | 0.66368197 | 21.44052 | 0.109218 | 64.45 |
| 300145 | 2017 | 0.273 | 0.05 | 0.814667 | 0.66368197 | 23.01227 | 0.127261 | 26.65 |
| 963    | 2017 | 0.813 | 0.05 | 0.814667 | 0.66368197 | 23.12125 | 0.214354 | 41.77 |
| 2415   | 2017 | 0.212 | 0.05 | 0.814667 | 0.66368197 | 24.66623 | 0.302158 | 39.59 |
| 601177 | 2017 | -0.03 | 0.05 | 0.814667 | 0.66368197 | 21.93042 | 0.016046 | 45.01 |
| 559    | 2017 | -0.3  | 0.05 | 0.814667 | 0.66368197 | 23.16816 | 0.17127  | 56.5  |
| 601177 | 2017 | 0.191 | 0.05 | 0.814667 | 0.66368197 | 22.05614 | 0.016046 | 45.01 |
| 300020 | 2017 | 1.226 | 0.05 | 0.814667 | 0.66368197 | 22.52545 | 0.040373 | 24.34 |
| 2276   | 2017 | -0.57 | 0.05 | 0.814667 | 0.66368197 | 22.67533 | 0.027395 | 30.41 |
| 300582 | 2017 | 0.11  | 0.05 | 0.814667 | 0.66368197 | 21.11104 | 0.027009 | 37.96 |
| 925    | 2017 | -0.26 | 0.05 | 0.814667 | 0.66368197 | 22.51762 | 0.050988 | 10.42 |
| 300266 | 2017 | -0.28 | 0.05 | 0.814667 | 0.66368197 | 22.97223 | 0.092004 | 34.35 |
| 2266   | 2017 | 0.393 | 0.05 | 0.814667 | 0.66368197 | 22.77062 | 0.031173 | 20.22 |
| 2135   | 2017 | -0.54 | 0.05 | 0.814667 | 0.66368197 | 23.03428 | 0.026814 | 30.41 |
| 300078 | 2017 | 1.383 | 0.05 | 0.814667 | 0.66368197 | 21.78856 | 0.062107 | 16.33 |
| 300145 | 2017 | 0.273 | 0.05 | 0.814667 | 0.66368197 | 23.01227 | 0.127261 | 26.65 |
| 603298 | 2017 | -0.61 | 0.05 | 0.814667 | 0.66368197 | 22.36352 | 0.137676 | 44.72 |
| 300078 | 2017 | 0.518 | 0.05 | 0.814667 | 0.66368197 | 21.78856 | 0.062107 | 16.33 |
| 2767   | 2017 | 0.147 | 0.05 | 0.814667 | 0.66368197 | 20.5194  | 0.066038 | 49.06 |
| 2280   | 2017 | 0.252 | 0.05 | 0.814667 | 0.66368197 | 23.44341 | 0.007088 | 22.42 |
| 603816 | 2017 | -0.9  | 0.05 | 0.814667 | 0.66368197 | 22.6044  | 0.206367 | 49.1  |
| 925    | 2017 | 0.533 | 0.05 | 0.814667 | 0.66368197 | 22.51762 | 0.050988 | 10.42 |
| 2493   | 2017 | 0.622 | 0.05 | 0.814667 | 0.66368197 | 24.85127 | 0.080423 | 70.36 |
| 2276   | 2017 | -0.57 | 0.05 | 0.814667 | 0.66368197 | 22.67533 | 0.027395 | 30.41 |
| 300244 | 2017 | 0.615 | 0.05 | 0.814667 | 0.66368197 | 22.72335 | 0.15749  | 38.09 |
| 600570 | 2017 | 2.197 | 0.05 | 0.814667 | 0.66368197 | 22.49008 | 0.131869 | 20.72 |
| 300582 | 2017 | 0.043 | 0.05 | 0.814667 | 0.66368197 | 21.11104 | 0.027009 | 37.96 |
| 2479   | 2017 | -0.34 | 0.05 | 0.814667 | 0.66368197 | 22.35258 | 0.128371 | 38    |
| 300478 | 2017 | 0.246 | 0.05 | 0.814667 | 0.66368197 | 21.03651 | 0.075331 | 38.25 |
| 2276   | 2017 | -0.57 | 0.05 | 0.814667 | 0.66368197 | 22.67533 | 0.027395 | 30.41 |
| 2488   | 2017 | 0.099 | 0.05 | 0.814667 | 0.66368197 | 22.69554 | 0.013052 | 12.52 |
| 2236   | 2017 | 1.028 | 0.05 | 0.814667 | 0.66368197 | 23.78354 | 0.224368 | 38.73 |
| 603816 | 2017 | -0.89 | 0.05 | 0.814667 | 0.66368197 | 22.6044  | 0.206367 | 49.1  |
| 2280   | 2017 | -0.28 | 0.05 | 0.814667 | 0.66368197 | 23.44341 | 0.007088 | 22.42 |
| 2236   | 2017 | 1.028 | 0.05 | 0.814667 | 0.66368197 | 23.78354 | 0.224368 | 38.73 |
| 2280   | 2017 | 0.55  | 0.05 | 0.814667 | 0.66368197 | 23.44341 | 0.007088 | 22.42 |
| 2266   | 2017 | -0.57 | 0.05 | 0.814667 | 0.66368197 | 22.77062 | 0.031173 | 20.22 |
| 603823 | 2017 | 0.833 | 0.05 | 0.814667 | 0.66368197 | 21.22197 | 0.109218 | 64.45 |
| 300144 | 2017 | 0.699 | 0.05 | 0.814667 | 0.66368197 | 22.89285 | 0.142994 | 29.48 |
| 607    | 2017 | -0.9  | 0.05 | 0.814667 | 0.66368197 | 21.97175 | 0.10483  | 48.13 |
| 2534   | 2017 | 0.172 | 0.05 | 0.814667 | 0.66368197 | 22.81526 | 0.132237 | 39    |
| 600677 | 2017 | -0.56 | 0.05 | 0.814667 | 0.66368197 | 23.18899 | -0.38817 | 19.2  |
| 2570   | 2017 | -0.14 | 0.05 | 0.814667 | 0.66368197 | 22.34394 | -0.4336  | 34.21 |
| 2493   | 2017 | 0.622 | 0.05 | 0.814667 | 0.66368197 | 24.85127 | 0.080423 | 70.36 |
| 300025 | 2017 | 0.884 | 0.05 | 0.814667 | 0.66368197 | 21.82484 | -0.18791 | 11.71 |
| 2266   | 2017 | -0.29 | 0.05 | 0.814667 | 0.66368197 | 22.77062 | 0.031173 | 20.22 |
| 925    | 2017 | 0.533 | 0.05 | 0.814667 | 0.66368197 | 22.51762 | 0.050988 | 10.42 |

|        |      |       |      |          |            |          |          |        |
|--------|------|-------|------|----------|------------|----------|----------|--------|
| 2570   | 2017 | -0.14 | 0.05 | 0.814667 | 0.66368197 | 22.34394 | -0.4336  | 34.21  |
| 2115   | 2017 | 0.963 | 0.05 | 0.814667 | 0.66368197 | 22.19015 | 0.024125 | 15.6   |
| 600126 | 2017 | -0.19 | 0.05 | 0.814667 | 0.66368197 | 23.39565 | 0.108202 | 44.69  |
| 300078 | 2017 | 0.588 | 0.05 | 0.814667 | 0.66368197 | 21.78856 | 0.062107 | 16.33  |
| 2552   | 2017 | 0.197 | 0.05 | 0.814667 | 0.66368197 | 20.60836 | -0.22784 | 32.17  |
| 300250 | 2017 | 1.85  | 0.05 | 0.814667 | 0.66368197 | 21.33882 | 0.046081 | 42.31  |
| 2276   | 2017 | -0.57 | 0.05 | 0.814667 | 0.66368197 | 22.67533 | 0.027395 | 30.41  |
| 300078 | 2017 | 0.588 | 0.05 | 0.814667 | 0.66368197 | 21.78856 | 0.062107 | 16.33  |
| 600571 | 2017 | 1.58  | 0.05 | 0.814667 | 0.66368197 | 21.5013  | -0.14534 | 17.76  |
| 600570 | 2017 | 2.036 | 0.05 | 0.814667 | 0.66368197 | 22.39488 | 0.131869 | 20.72  |
| 300020 | 2017 | 0.166 | 0.05 | 0.814667 | 0.66368197 | 22.52545 | 0.040373 | 24.34  |
| 2493   | 2017 | 0.236 | 0.05 | 0.814667 | 0.66368197 | 24.85127 | 0.080423 | 70.36  |
| 2266   | 2017 | -0.31 | 0.05 | 0.814667 | 0.66368197 | 22.77062 | 0.031173 | 20.22  |
| 2444   | 2017 | -0.63 | 0.05 | 0.814667 | 0.66368197 | 22.79288 | 0.091273 | 44.54  |
| 2637   | 2017 | 0.66  | 0.05 | 0.814667 | 0.66368197 | 22.57475 | 0.057845 | 16.58  |
| 2115   | 2017 | 1.183 | 0.05 | 0.814667 | 0.66368197 | 22.19015 | 0.024125 | 15.6   |
| 2236   | 2017 | 1.297 | 0.05 | 0.814667 | 0.66368197 | 23.78354 | 0.224368 | 38.73  |
| 300068 | 2017 | -0.07 | 0.05 | 0.814667 | 0.66368197 | 23.11152 | 0.067892 | 13.61  |
| 300033 | 2017 | 2.419 | 0.05 | 0.814667 | 0.66368197 | 22.16101 | 0.228974 | 36     |
| 300244 | 2017 | 0.615 | 0.05 | 0.814667 | 0.66368197 | 22.72335 | 0.15749  | 38.09  |
| 2236   | 2017 | 0.966 | 0.05 | 0.814667 | 0.66368197 | 23.78354 | 0.224368 | 38.73  |
| 600776 | 2017 | -0.3  | 0.05 | 0.814667 | 0.66368197 | 22.05079 | 0.039097 | 45.439 |
| 600460 | 2017 | 0.028 | 0.05 | 0.814667 | 0.66368197 | 22.55655 | 0.032368 | 41.17  |
| 603298 | 2017 | 0.072 | 0.05 | 0.814667 | 0.66368197 | 22.36352 | 0.137676 | 44.72  |
| 600477 | 2017 | 0.132 | 0.05 | 0.814667 | 0.66368197 | 22.66166 | 0.252524 | 43.65  |
| 300203 | 2017 | 0.448 | 0.05 | 0.814667 | 0.66368197 | 22.57612 | 0.144501 | 24.65  |
| 2276   | 2017 | -0.57 | 0.05 | 0.814667 | 0.66368197 | 22.67533 | 0.027395 | 30.41  |
| 300203 | 2017 | 0.534 | 0.05 | 0.814667 | 0.66368197 | 22.57612 | 0.144501 | 24.65  |
| 600776 | 2017 | 1.024 | 0.05 | 0.814667 | 0.66368197 | 22.05079 | 0.039097 | 45.439 |
| 2115   | 2017 | 0.963 | 0.05 | 0.814667 | 0.66368197 | 22.19015 | 0.024125 | 15.6   |
| 156    | 2017 | 0.25  | 0.05 | 0.814667 | 0.66368197 | 23.3919  | 0.019885 | 41.85  |
| 2276   | 2017 | -0.57 | 0.05 | 0.814667 | 0.66368197 | 22.67533 | 0.027395 | 30.41  |
| 559    | 2017 | -0.08 | 0.05 | 0.814667 | 0.66368197 | 23.16816 | 0.17127  | 56.5   |
| 2280   | 2017 | 0.204 | 0.05 | 0.814667 | 0.66368197 | 23.44341 | 0.007088 | 22.42  |
| 300078 | 2017 | 0.39  | 0.05 | 0.814667 | 0.66368197 | 21.78856 | 0.062107 | 16.33  |
| 925    | 2017 | 0.495 | 0.05 | 0.814667 | 0.66368197 | 22.51762 | 0.050988 | 10.42  |
| 603823 | 2017 | -0.16 | 0.05 | 0.814667 | 0.66368197 | 21.44052 | 0.109218 | 64.45  |
| 300145 | 2017 | 0.273 | 0.05 | 0.814667 | 0.66368197 | 23.01227 | 0.127261 | 26.65  |
| 2247   | 2017 | -0.06 | 0.05 | 0.814667 | 0.66368197 | 22.48566 | 0.095711 | 15.32  |
| 2135   | 2017 | -0.1  | 0.05 | 0.814667 | 0.66368197 | 23.03428 | 0.026814 | 30.41  |
| 2552   | 2017 | 0.579 | 0.05 | 0.814667 | 0.66368197 | 20.60836 | -0.22784 | 32.17  |
| 300244 | 2017 | 0.615 | 0.05 | 0.814667 | 0.66368197 | 22.72335 | 0.15749  | 38.09  |
| 600477 | 2017 | -0.53 | 0.05 | 0.814667 | 0.66368197 | 22.66166 | 0.252524 | 43.65  |
| 2236   | 2017 | 1.011 | 0.05 | 0.814667 | 0.66368197 | 23.78354 | 0.224368 | 38.73  |
| 2276   | 2017 | -0.46 | 0.05 | 0.814667 | 0.66368197 | 22.67533 | 0.027395 | 30.41  |
| 963    | 2017 | 0.151 | 0.05 | 0.814667 | 0.66368197 | 23.49505 | 0.214354 | 41.77  |
| 603816 | 2017 | -0.89 | 0.05 | 0.814667 | 0.66368197 | 22.33878 | 0.206367 | 49.1   |
| 2415   | 2017 | 0.221 | 0.05 | 0.814667 | 0.66368197 | 24.66623 | 0.302158 | 39.59  |
| 2418   | 2017 | -0.75 | 0.05 | 0.814667 | 0.66368197 | 22.98458 | 0.100676 | 15.58  |
| 600776 | 2017 | 0.041 | 0.05 | 0.814667 | 0.66368197 | 22.05079 | 0.039097 | 45.439 |
| 2570   | 2017 | -0.14 | 0.05 | 0.814667 | 0.66368197 | 22.34394 | -0.4336  | 34.21  |
| 2214   | 2017 | 1.422 | 0.05 | 0.814667 | 0.66368197 | 21.07916 | 0.030128 | 29.1   |
| 2280   | 2017 | 0.55  | 0.05 | 0.814667 | 0.66368197 | 23.44341 | 0.007088 | 22.42  |
| 300113 | 2017 | 1.634 | 0.05 | 0.814667 | 0.66368197 | 22.10468 | 0.192403 | 40.37  |

|        |      |       |      |          |            |          |          |        |
|--------|------|-------|------|----------|------------|----------|----------|--------|
| 2214   | 2017 | 0.539 | 0.05 | 0.814667 | 0.66368197 | 21.07916 | 0.030128 | 29.1   |
| 2418   | 2017 | -0.89 | 0.05 | 0.814667 | 0.66368197 | 22.98458 | 0.100676 | 15.58  |
| 2430   | 2017 | -0.27 | 0.05 | 0.814667 | 0.66368197 | 23.12924 | 0.076223 | 54.4   |
| 300025 | 2017 | 0.089 | 0.05 | 0.814667 | 0.66368197 | 21.82484 | -0.18791 | 11.71  |
| 601177 | 2017 | 0.316 | 0.05 | 0.814667 | 0.66368197 | 22.05614 | 0.016046 | 45.01  |
| 2534   | 2017 | 0.172 | 0.05 | 0.814667 | 0.66368197 | 22.81526 | 0.132237 | 39     |
| 600987 | 2017 | -0.54 | 0.05 | 0.814667 | 0.66368197 | 21.59946 | 0.179981 | 34.26  |
| 2019   | 2017 | -0.19 | 0.05 | 0.814667 | 0.66368197 | 22.89434 | 0.186613 | 43.18  |
| 2115   | 2017 | -0.14 | 0.05 | 0.814667 | 0.66368197 | 22.19015 | 0.024125 | 15.6   |
| 2280   | 2017 | -0.28 | 0.05 | 0.814667 | 0.66368197 | 23.44341 | 0.007088 | 22.42  |
| 300270 | 2017 | 0.389 | 0.05 | 0.814667 | 0.66368197 | 20.8272  | 0.064807 | 57.51  |
| 600671 | 2017 | -0.86 | 0.05 | 0.814667 | 0.66368197 | 20.10336 | 0.092483 | 24.63  |
| 600677 | 2017 | 0.022 | 0.05 | 0.814667 | 0.66368197 | 23.18899 | -0.38817 | 19.2   |
| 300512 | 2017 | 0.187 | 0.05 | 0.814667 | 0.66368197 | 21.46736 | 0.132363 | 38.53  |
| 300300 | 2017 | 1.421 | 0.05 | 0.814667 | 0.66368197 | 21.94408 | 0.039523 | 47.73  |
| 2488   | 2017 | 0.039 | 0.05 | 0.814667 | 0.66368197 | 22.69554 | 0.013052 | 12.52  |
| 2135   | 2017 | -0.1  | 0.05 | 0.814667 | 0.66368197 | 23.03428 | 0.026814 | 30.41  |
| 300203 | 2017 | 1.11  | 0.05 | 0.814667 | 0.66368197 | 22.57612 | 0.144501 | 24.65  |
| 300550 | 2017 | 1.661 | 0.05 | 0.814667 | 0.66368197 | 20.32635 | 0.064908 | 56.29  |
| 300020 | 2017 | 1.226 | 0.05 | 0.814667 | 0.66368197 | 22.52545 | 0.040373 | 24.34  |
| 300244 | 2017 | -0.05 | 0.05 | 0.814667 | 0.66368197 | 22.72335 | 0.15749  | 38.09  |
| 600477 | 2017 | -0.2  | 0.05 | 0.814667 | 0.66368197 | 22.66166 | 0.252524 | 43.65  |
| 600763 | 2017 | -0.87 | 0.05 | 0.814667 | 0.66368197 | 21.30801 | 0.206214 | 33.75  |
| 2284   | 2017 | 0.298 | 0.05 | 0.814667 | 0.66368197 | 22.55617 | 0.030322 | 38.82  |
| 2115   | 2017 | 1.183 | 0.05 | 0.814667 | 0.66368197 | 22.0058  | 0.024125 | 15.6   |
| 300068 | 2017 | 0.182 | 0.05 | 0.814667 | 0.66368197 | 23.07093 | 0.067892 | 13.61  |
| 925    | 2017 | 0.356 | 0.05 | 0.814667 | 0.66368197 | 22.51762 | 0.050988 | 10.42  |
| 300347 | 2017 | 0.695 | 0.05 | 0.814667 | 0.66368197 | 21.99951 | 0.117834 | 26.82  |
| 300078 | 2017 | 1.466 | 0.05 | 0.814667 | 0.66368197 | 21.78856 | 0.062107 | 16.33  |
| 603901 | 2017 | -0.44 | 0.05 | 0.814667 | 0.66368197 | 21.56882 | 0.067955 | 42.9   |
| 600570 | 2017 | 2.594 | 0.05 | 0.814667 | 0.66368197 | 22.49008 | 0.131869 | 20.72  |
| 2236   | 2017 | 1.161 | 0.05 | 0.814667 | 0.66368197 | 23.78354 | 0.224368 | 38.73  |
| 600460 | 2017 | 0.028 | 0.05 | 0.814667 | 0.66368197 | 22.55655 | 0.032368 | 41.17  |
| 600677 | 2017 | -0.56 | 0.05 | 0.814667 | 0.66368197 | 23.18899 | -0.38817 | 19.2   |
| 600677 | 2017 | -0.28 | 0.05 | 0.814667 | 0.66368197 | 23.18899 | -0.38817 | 19.2   |
| 603558 | 2017 | -0.74 | 0.05 | 0.814667 | 0.66368197 | 21.91215 | 0.047402 | 40.09  |
| 2122   | 2017 | 0.167 | 0.05 | 0.814667 | 0.66368197 | 22.87529 | 0.01112  | 29.97  |
| 600571 | 2017 | 1.58  | 0.05 | 0.814667 | 0.66368197 | 21.5013  | -0.14534 | 17.76  |
| 300145 | 2017 | 0.054 | 0.05 | 0.814667 | 0.66368197 | 23.01227 | 0.127261 | 26.65  |
| 600677 | 2017 | 0.544 | 0.05 | 0.814667 | 0.66368197 | 23.18899 | -0.38817 | 19.2   |
| 300250 | 2017 | 1.85  | 0.05 | 0.814667 | 0.66368197 | 21.33882 | 0.046081 | 42.31  |
| 600776 | 2017 | 1.024 | 0.05 | 0.814667 | 0.66368197 | 22.05079 | 0.039097 | 45.439 |
| 300203 | 2017 | -0.21 | 0.05 | 0.814667 | 0.66368197 | 22.57612 | 0.144501 | 24.65  |
| 300244 | 2017 | 0.615 | 0.05 | 0.814667 | 0.66368197 | 22.72335 | 0.15749  | 38.09  |
| 2266   | 2017 | 0.116 | 0.05 | 0.814667 | 0.66368197 | 22.57045 | 0.031173 | 20.22  |
| 603816 | 2017 | -0.89 | 0.05 | 0.814667 | 0.66368197 | 22.6044  | 0.206367 | 49.1   |
| 2276   | 2017 | -0.48 | 0.05 | 0.814667 | 0.66368197 | 22.67533 | 0.027395 | 30.41  |
| 2415   | 2017 | 0.482 | 0.05 | 0.814667 | 0.66368197 | 24.66623 | 0.302158 | 39.59  |
| 300133 | 2017 | 0.485 | 0.05 | 0.814667 | 0.66368197 | 23.2521  | 0.090756 | 26.34  |
| 2010   | 2017 | 0.036 | 0.05 | 0.814667 | 0.66368197 | 23.62633 | 0.043158 | 60.56  |
| 300244 | 2017 | 0.615 | 0.05 | 0.814667 | 0.66368197 | 22.72335 | 0.15749  | 38.09  |
| 607    | 2017 | -0.9  | 0.05 | 0.814667 | 0.66368197 | 21.88661 | 0.10483  | 48.13  |
| 2122   | 2017 | -0.4  | 0.05 | 0.814667 | 0.66368197 | 22.87529 | 0.01112  | 29.97  |
| 300144 | 2017 | 0.699 | 0.05 | 0.814667 | 0.66368197 | 22.89285 | 0.142994 | 29.48  |

|        |      |       |      |          |            |          |          |       |
|--------|------|-------|------|----------|------------|----------|----------|-------|
| 600763 | 2017 | -0.49 | 0.05 | 0.814667 | 0.66368197 | 21.30801 | 0.206214 | 33.75 |
| 600477 | 2017 | 0.171 | 0.05 | 0.814667 | 0.66368197 | 22.66166 | 0.252524 | 43.65 |
| 300459 | 2017 | 0.64  | 0.05 | 0.814667 | 0.66368197 | 23.09618 | 0.042864 | 18.29 |
| 300033 | 2017 | 2.419 | 0.05 | 0.814667 | 0.66368197 | 22.16101 | 0.228974 | 36    |
| 2115   | 2017 | 0.994 | 0.05 | 0.814667 | 0.66368197 | 22.19015 | 0.024125 | 15.6  |
| 2019   | 2017 | -0.19 | 0.05 | 0.814667 | 0.66368197 | 22.89434 | 0.186613 | 43.18 |
| 300078 | 2017 | 0.518 | 0.05 | 0.814667 | 0.66368197 | 21.78856 | 0.062107 | 16.33 |
| 300068 | 2017 | -0.09 | 0.05 | 0.814667 | 0.66368197 | 23.11152 | 0.067892 | 13.61 |
| 600677 | 2017 | 0.102 | 0.05 | 0.814667 | 0.66368197 | 23.18899 | -0.38817 | 19.2  |
| 2364   | 2017 | 0.903 | 0.05 | 0.814667 | 0.66368197 | 21.70655 | 0.024834 | 35.56 |
| 2019   | 2017 | -0.19 | 0.05 | 0.814667 | 0.66368197 | 22.89434 | 0.186613 | 43.18 |
| 2430   | 2017 | -0.6  | 0.05 | 0.814667 | 0.66368197 | 23.12924 | 0.076223 | 54.4  |
| 603298 | 2017 | -0.61 | 0.05 | 0.814667 | 0.66368197 | 22.36352 | 0.137676 | 44.72 |
| 603556 | 2017 | 0.513 | 0.05 | 0.814667 | 0.66368197 | 22.58791 | 0.120085 | 48.5  |
| 300144 | 2017 | 0.699 | 0.05 | 0.814667 | 0.66368197 | 22.70187 | 0.142994 | 29.48 |
| 300020 | 2017 | 1.226 | 0.05 | 0.814667 | 0.66368197 | 22.52545 | 0.040373 | 24.34 |
| 2364   | 2017 | 0.722 | 0.05 | 0.814667 | 0.66368197 | 21.70655 | 0.024834 | 35.56 |
| 2801   | 2017 | 0.684 | 0.05 | 0.814667 | 0.66368197 | 20.70867 | 0.128239 | 39.18 |
| 2019   | 2017 | 0.695 | 0.05 | 0.814667 | 0.66368197 | 22.89434 | 0.186613 | 43.18 |
| 300145 | 2017 | 0.273 | 0.05 | 0.814667 | 0.66368197 | 23.01227 | 0.127261 | 26.65 |
| 300145 | 2017 | -0.52 | 0.05 | 0.814667 | 0.66368197 | 23.01227 | 0.127261 | 26.65 |
| 300145 | 2017 | -0.02 | 0.05 | 0.814667 | 0.66368197 | 23.01227 | 0.127261 | 26.65 |
| 559    | 2017 | -0.59 | 0.05 | 0.814667 | 0.66368197 | 22.61956 | 0.17127  | 56.5  |
| 600571 | 2017 | 1.58  | 0.05 | 0.814667 | 0.66368197 | 21.5013  | -0.14534 | 17.76 |
| 300020 | 2017 | 1.12  | 0.05 | 0.814667 | 0.66368197 | 22.52545 | 0.040373 | 24.34 |
| 2010   | 2017 | 0.666 | 0.05 | 0.814667 | 0.66368197 | 23.9046  | 0.043158 | 60.56 |
| 300478 | 2017 | 0.246 | 0.05 | 0.814667 | 0.66368197 | 21.03651 | 0.075331 | 38.25 |
| 603558 | 2017 | -0.51 | 0.05 | 0.814667 | 0.66368197 | 21.91215 | 0.047402 | 40.09 |
| 925    | 2017 | 0.533 | 0.05 | 0.814667 | 0.66368197 | 22.51762 | 0.050988 | 10.42 |
| 300020 | 2017 | -0.1  | 0.05 | 0.814667 | 0.66368197 | 22.52545 | 0.040373 | 24.34 |
| 600677 | 2017 | -0.56 | 0.05 | 0.814667 | 0.66368197 | 23.18899 | -0.38817 | 19.2  |
| 925    | 2017 | 0.732 | 0.05 | 0.814667 | 0.66368197 | 22.05081 | 0.050988 | 10.42 |
| 300145 | 2017 | 0.245 | 0.05 | 0.814667 | 0.66368197 | 22.87255 | 0.127261 | 26.65 |
| 300244 | 2017 | 0.462 | 0.05 | 0.814667 | 0.66368197 | 22.72335 | 0.15749  | 38.09 |
| 300347 | 2017 | 0.695 | 0.05 | 0.814667 | 0.66368197 | 21.99951 | 0.117834 | 26.82 |
| 300113 | 2017 | 1.634 | 0.05 | 0.814667 | 0.66368197 | 22.10468 | 0.192403 | 40.37 |
| 2364   | 2017 | 0.438 | 0.05 | 0.814667 | 0.66368197 | 21.70655 | 0.024834 | 35.56 |
| 2135   | 2017 | -0    | 0.05 | 0.814667 | 0.66368197 | 23.03428 | 0.026814 | 30.41 |
| 559    | 2017 | -0.44 | 0.05 | 0.814667 | 0.66368197 | 23.16816 | 0.17127  | 56.5  |
| 600596 | 2017 | 0.019 | 0.05 | 0.814667 | 0.66368197 | 22.92717 | 0.106973 | 14.42 |
| 2534   | 2017 | 0.987 | 0.05 | 0.814667 | 0.66368197 | 22.81526 | 0.132237 | 39    |
| 2418   | 2017 | -0.75 | 0.05 | 0.814667 | 0.66368197 | 22.98458 | 0.100676 | 15.58 |
| 600460 | 2017 | 0.028 | 0.05 | 0.814667 | 0.66368197 | 22.06141 | 0.032368 | 41.17 |
| 2115   | 2017 | 0.521 | 0.05 | 0.814667 | 0.66368197 | 22.19015 | 0.024125 | 15.6  |
| 600763 | 2017 | -0.34 | 0.05 | 0.814667 | 0.66368197 | 21.30801 | 0.206214 | 33.75 |
| 600677 | 2017 | -0.56 | 0.05 | 0.814667 | 0.66368197 | 23.18899 | -0.38817 | 19.2  |
| 600797 | 2017 | -0.11 | 0.05 | 0.814667 | 0.66368197 | 22.60008 | 0.069747 | 17.01 |
| 300266 | 2017 | 1.045 | 0.05 | 0.814667 | 0.66368197 | 22.97223 | 0.092004 | 34.35 |
| 300266 | 2017 | 0.477 | 0.05 | 0.814667 | 0.66368197 | 22.97223 | 0.092004 | 34.35 |
| 300145 | 2017 | 0.273 | 0.05 | 0.814667 | 0.66368197 | 23.01227 | 0.127261 | 26.65 |
| 300250 | 2017 | 1.85  | 0.05 | 0.814667 | 0.66368197 | 21.33882 | 0.046081 | 42.31 |
| 600797 | 2017 | 0.012 | 0.05 | 0.814667 | 0.66368197 | 22.60008 | 0.069747 | 17.01 |
| 2534   | 2017 | 0.546 | 0.05 | 0.814667 | 0.66368197 | 22.81526 | 0.132237 | 39    |
| 963    | 2017 | -0.51 | 0.05 | 0.814667 | 0.66368197 | 23.49505 | 0.214354 | 41.77 |

|        |      |       |      |          |            |          |          |        |
|--------|------|-------|------|----------|------------|----------|----------|--------|
| 600776 | 2017 | 1.024 | 0.05 | 0.814667 | 0.66368197 | 22.05079 | 0.039097 | 45.439 |
| 600797 | 2017 | 0.012 | 0.05 | 0.814667 | 0.66368197 | 22.60008 | 0.069747 | 17.01  |
| 2284   | 2017 | 0.74  | 0.05 | 0.814667 | 0.66368197 | 22.55617 | 0.030322 | 38.82  |
| 600987 | 2017 | -0.46 | 0.05 | 0.814667 | 0.66368197 | 22.30246 | 0.179981 | 34.26  |
| 2266   | 2017 | -0.57 | 0.05 | 0.814667 | 0.66368197 | 22.77062 | 0.031173 | 20.22  |
| 2534   | 2017 | 0.325 | 0.05 | 0.814667 | 0.66368197 | 22.628   | 0.132237 | 39     |
| 2280   | 2017 | 0.55  | 0.05 | 0.814667 | 0.66368197 | 23.44341 | 0.007088 | 22.42  |
| 2552   | 2017 | 0.579 | 0.05 | 0.814667 | 0.66368197 | 20.60836 | -0.22784 | 32.17  |
| 300250 | 2017 | 1.454 | 0.05 | 0.814667 | 0.66368197 | 21.33882 | 0.046081 | 42.31  |
| 2284   | 2017 | -0.3  | 0.05 | 0.814667 | 0.66368197 | 22.55617 | 0.030322 | 38.82  |
| 603901 | 2017 | -0.02 | 0.05 | 0.814667 | 0.66368197 | 21.56882 | 0.067955 | 42.9   |
| 600460 | 2017 | 0.662 | 0.05 | 0.814667 | 0.66368197 | 22.55655 | 0.032368 | 41.17  |
| 603556 | 2017 | 0.681 | 0.05 | 0.814667 | 0.66368197 | 22.52033 | 0.120085 | 48.5   |
| 2444   | 2017 | -0.63 | 0.05 | 0.814667 | 0.66368197 | 22.79288 | 0.091273 | 44.54  |
| 600576 | 2017 | 1.226 | 0.05 | 0.814667 | 0.66368197 | 21.45824 | 0.049198 | 29.58  |
| 600596 | 2017 | -0.43 | 0.05 | 0.814667 | 0.66368197 | 22.92717 | 0.106973 | 14.42  |
| 300020 | 2017 | 0.858 | 0.05 | 0.814667 | 0.66368197 | 22.52545 | 0.040373 | 24.34  |
| 2236   | 2017 | 1.112 | 0.05 | 0.814667 | 0.66368197 | 23.78354 | 0.224368 | 38.73  |
| 925    | 2017 | 0.533 | 0.05 | 0.814667 | 0.66368197 | 22.51762 | 0.050988 | 10.42  |
| 300244 | 2017 | 0.615 | 0.05 | 0.814667 | 0.66368197 | 22.72335 | 0.15749  | 38.09  |
| 2430   | 2017 | 0.195 | 0.05 | 0.814667 | 0.66368197 | 23.12924 | 0.076223 | 54.4   |
| 925    | 2017 | -0.26 | 0.05 | 0.814667 | 0.66368197 | 22.51762 | 0.050988 | 10.42  |
| 300306 | 2017 | 0.661 | 0.05 | 0.814667 | 0.66368197 | 21.54398 | 0.065476 | 27.85  |
| 2364   | 2017 | 0.722 | 0.05 | 0.814667 | 0.66368197 | 21.70655 | 0.024834 | 35.56  |
| 2418   | 2017 | -0.75 | 0.05 | 0.814667 | 0.66368197 | 22.98458 | 0.100676 | 15.58  |
| 600571 | 2017 | 2.316 | 0.05 | 0.814667 | 0.66368197 | 21.5013  | -0.14534 | 17.76  |
| 2637   | 2017 | 0.762 | 0.05 | 0.814667 | 0.66368197 | 22.57475 | 0.057845 | 16.58  |
| 300025 | 2017 | 0.884 | 0.05 | 0.814667 | 0.66368197 | 21.16762 | -0.18791 | 11.71  |
| 300306 | 2017 | 1.506 | 0.05 | 0.814667 | 0.66368197 | 21.45413 | 0.065476 | 27.85  |
| 559    | 2017 | -0.3  | 0.05 | 0.814667 | 0.66368197 | 23.16816 | 0.17127  | 56.5   |
| 300144 | 2017 | 0.699 | 0.05 | 0.814667 | 0.66368197 | 22.89285 | 0.142994 | 29.48  |
| 2637   | 2017 | 0.66  | 0.05 | 0.814667 | 0.66368197 | 22.57475 | 0.057845 | 16.58  |
| 300306 | 2017 | 0.181 | 0.05 | 0.814667 | 0.66368197 | 21.54398 | 0.065476 | 27.85  |
| 2019   | 2017 | -0.19 | 0.05 | 0.814667 | 0.66368197 | 22.46036 | 0.186613 | 43.18  |
| 300020 | 2017 | 1.226 | 0.05 | 0.814667 | 0.66368197 | 22.52545 | 0.040373 | 24.34  |
| 600477 | 2017 | 0.171 | 0.05 | 0.814667 | 0.66368197 | 22.66166 | 0.252524 | 43.65  |
| 300306 | 2017 | 1.506 | 0.05 | 0.814667 | 0.66368197 | 21.54398 | 0.065476 | 27.85  |
| 2488   | 2017 | 0.099 | 0.05 | 0.814667 | 0.66368197 | 22.69554 | 0.013052 | 12.52  |
| 2625   | 2017 | -0.13 | 0.05 | 0.814667 | 0.66368197 | 22.83889 | 0.010605 | 42.6   |
| 300145 | 2017 | -0.52 | 0.05 | 0.814667 | 0.66368197 | 23.01227 | 0.127261 | 26.65  |
| 300266 | 2017 | 0.087 | 0.05 | 0.814667 | 0.66368197 | 22.97223 | 0.092004 | 34.35  |
| 300020 | 2017 | 1.226 | 0.05 | 0.814667 | 0.66368197 | 22.52545 | 0.040373 | 24.34  |
| 300020 | 2017 | 1.226 | 0.05 | 0.814667 | 0.66368197 | 22.52545 | 0.040373 | 24.34  |
| 2236   | 2017 | 0.896 | 0.05 | 0.814667 | 0.66368197 | 23.78354 | 0.224368 | 38.73  |
| 2115   | 2017 | 0.994 | 0.05 | 0.814667 | 0.66368197 | 22.19015 | 0.024125 | 15.6   |
| 2444   | 2017 | -0.62 | 0.05 | 0.814667 | 0.66368197 | 22.79288 | 0.091273 | 44.54  |
| 600671 | 2017 | -0.48 | 0.05 | 0.814667 | 0.66368197 | 20.10336 | 0.092483 | 24.63  |
| 2444   | 2017 | -0.63 | 0.05 | 0.814667 | 0.66368197 | 22.79288 | 0.091273 | 44.54  |
| 600460 | 2017 | 1.352 | 0.05 | 0.814667 | 0.66368197 | 22.55655 | 0.032368 | 41.17  |
| 603806 | 2017 | 0.565 | 0.05 | 0.814667 | 0.66368197 | 22.46432 | 0.116369 | 56.29  |
| 300553 | 2017 | 0.826 | 0.05 | 0.814667 | 0.66368197 | 20.10336 | 0.065726 | 14.21  |
| 2444   | 2017 | -0.15 | 0.05 | 0.814667 | 0.66368197 | 22.79288 | 0.091273 | 44.54  |
| 2534   | 2017 | 0.172 | 0.05 | 0.814667 | 0.66368197 | 22.81526 | 0.132237 | 39     |
| 2415   | 2017 | 0.212 | 0.05 | 0.814667 | 0.66368197 | 24.66623 | 0.302158 | 39.59  |



|        |      |       |      |          |            |          |          |       |
|--------|------|-------|------|----------|------------|----------|----------|-------|
| 300145 | 2017 | 0.141 | 0.05 | 0.814667 | 0.66368197 | 23.01227 | 0.127261 | 26.65 |
| 603901 | 2017 | -0.52 | 0.05 | 0.814667 | 0.66368197 | 21.56882 | 0.067955 | 42.9  |
| 2280   | 2017 | 0.156 | 0.05 | 0.814667 | 0.66368197 | 23.44341 | 0.007088 | 22.42 |
| 300078 | 2017 | 0.588 | 0.05 | 0.814667 | 0.66368197 | 21.78856 | 0.062107 | 16.33 |
| 2444   | 2017 | 0.031 | 0.05 | 0.814667 | 0.66368197 | 22.79288 | 0.091273 | 44.54 |
| 2415   | 2017 | 0.212 | 0.05 | 0.814667 | 0.66368197 | 24.66623 | 0.302158 | 39.59 |
| 300203 | 2017 | 1.11  | 0.05 | 0.814667 | 0.66368197 | 22.57612 | 0.144501 | 24.65 |
| 600704 | 2017 | 0.371 | 0.05 | 0.814667 | 0.66368197 | 25.17696 | 0.111454 | 33.81 |
| 600570 | 2017 | 1.932 | 0.05 | 0.814667 | 0.66368197 | 22.49008 | 0.131869 | 20.72 |
| 2444   | 2017 | -0.63 | 0.05 | 0.814667 | 0.66368197 | 22.79288 | 0.091273 | 44.54 |
| 300306 | 2017 | 1.506 | 0.05 | 0.814667 | 0.66368197 | 21.54398 | 0.065476 | 27.85 |
| 603816 | 2017 | -0.9  | 0.05 | 0.814667 | 0.66368197 | 22.6044  | 0.206367 | 49.1  |
| 156    | 2017 | 0.361 | 0.05 | 0.814667 | 0.66368197 | 23.06837 | 0.019885 | 41.85 |
| 600460 | 2017 | 0.028 | 0.05 | 0.814667 | 0.66368197 | 22.55655 | 0.032368 | 41.17 |
| 2444   | 2017 | -0.33 | 0.05 | 0.814667 | 0.66368197 | 22.79288 | 0.091273 | 44.54 |
| 300300 | 2017 | 0.411 | 0.05 | 0.814667 | 0.66368197 | 21.94408 | 0.039523 | 47.73 |
| 300020 | 2017 | 1.226 | 0.05 | 0.814667 | 0.66368197 | 22.52545 | 0.040373 | 24.34 |
| 600596 | 2017 | -0.69 | 0.05 | 0.814667 | 0.66368197 | 22.92717 | 0.106973 | 14.42 |
| 600460 | 2017 | 0.028 | 0.05 | 0.814667 | 0.66368197 | 22.55655 | 0.032368 | 41.17 |
| 2364   | 2017 | 1.385 | 0.05 | 0.814667 | 0.66368197 | 21.70655 | 0.024834 | 35.56 |
| 2552   | 2017 | 0.271 | 0.05 | 0.814667 | 0.66368197 | 20.60836 | -0.22784 | 32.17 |
| 2019   | 2017 | -0.19 | 0.05 | 0.814667 | 0.66368197 | 22.89434 | 0.186613 | 43.18 |
| 2266   | 2017 | -0.57 | 0.05 | 0.814667 | 0.66368197 | 22.77062 | 0.031173 | 20.22 |
| 603298 | 2017 | 0.128 | 0.05 | 0.814667 | 0.66368197 | 22.20211 | 0.137676 | 44.72 |
| 603298 | 2017 | -0.61 | 0.05 | 0.814667 | 0.66368197 | 22.36352 | 0.137676 | 44.72 |
| 600677 | 2017 | -0.03 | 0.05 | 0.814667 | 0.66368197 | 23.18899 | -0.38817 | 19.2  |
| 600677 | 2017 | -0.56 | 0.05 | 0.814667 | 0.66368197 | 22.2545  | -0.38817 | 19.2  |
| 2479   | 2017 | -0.31 | 0.05 | 0.814667 | 0.66368197 | 22.35258 | 0.128371 | 38    |
| 300306 | 2017 | 0.623 | 0.05 | 0.814667 | 0.66368197 | 21.54398 | 0.065476 | 27.85 |
| 2625   | 2017 | -0.13 | 0.05 | 0.814667 | 0.66368197 | 22.80116 | 0.010605 | 42.6  |
| 2284   | 2017 | -0.58 | 0.05 | 0.814667 | 0.66368197 | 22.55617 | 0.030322 | 38.82 |
| 2010   | 2017 | -0.66 | 0.05 | 0.814667 | 0.66368197 | 23.9046  | 0.043158 | 60.56 |
| 300435 | 2017 | -0.08 | 0.05 | 0.814667 | 0.66368197 | 20.99334 | 0.078668 | 52.6  |
| 2010   | 2017 | -0.66 | 0.05 | 0.814667 | 0.66368197 | 23.9046  | 0.043158 | 60.56 |
| 2247   | 2017 | -0.06 | 0.05 | 0.814667 | 0.66368197 | 22.48566 | 0.095711 | 15.32 |
| 300203 | 2017 | 0.252 | 0.05 | 0.814667 | 0.66368197 | 22.57612 | 0.144501 | 24.65 |
| 300078 | 2017 | 0.588 | 0.05 | 0.814667 | 0.66368197 | 21.78856 | 0.062107 | 16.33 |
| 2625   | 2017 | -0.13 | 0.05 | 0.814667 | 0.66368197 | 22.83889 | 0.010605 | 42.6  |
| 2364   | 2017 | 0.502 | 0.05 | 0.814667 | 0.66368197 | 21.70655 | 0.024834 | 35.56 |
| 2019   | 2017 | -0.19 | 0.05 | 0.814667 | 0.66368197 | 22.89434 | 0.186613 | 43.18 |
| 300113 | 2017 | 1.634 | 0.05 | 0.814667 | 0.66368197 | 22.10468 | 0.192403 | 40.37 |
| 2010   | 2017 | -0.66 | 0.05 | 0.814667 | 0.66368197 | 23.9046  | 0.043158 | 60.56 |
| 600677 | 2017 | 0.162 | 0.05 | 0.814667 | 0.66368197 | 23.18899 | -0.38817 | 19.2  |
| 603298 | 2017 | 0.054 | 0.05 | 0.814667 | 0.66368197 | 22.36352 | 0.137676 | 44.72 |
| 2625   | 2017 | -0.13 | 0.05 | 0.814667 | 0.66368197 | 22.83889 | 0.010605 | 42.6  |
| 2415   | 2017 | 0.212 | 0.05 | 0.814667 | 0.66368197 | 24.66623 | 0.302158 | 39.59 |
| 300360 | 2017 | -0.35 | 0.05 | 0.814667 | 0.66368197 | 21.6219  | 0.076491 | 22.81 |
| 2010   | 2017 | -0.35 | 0.05 | 0.814667 | 0.66368197 | 23.9046  | 0.043158 | 60.56 |
| 2010   | 2017 | -0.36 | 0.05 | 0.814667 | 0.66368197 | 23.9046  | 0.043158 | 60.56 |
| 2488   | 2017 | 0.701 | 0.05 | 0.814667 | 0.66368197 | 22.66216 | 0.013052 | 12.52 |
| 2493   | 2017 | 0.622 | 0.05 | 0.814667 | 0.66368197 | 24.85127 | 0.080423 | 70.36 |
| 2010   | 2017 | -0.56 | 0.05 | 0.814667 | 0.66368197 | 23.9046  | 0.043158 | 60.56 |
| 2493   | 2017 | -0.15 | 0.05 | 0.814667 | 0.66368197 | 23.78353 | 0.080423 | 70.36 |
| 2493   | 2017 | 0.622 | 0.05 | 0.814667 | 0.66368197 | 24.85127 | 0.080423 | 70.36 |

|        |      |       |      |          |            |          |          |       |
|--------|------|-------|------|----------|------------|----------|----------|-------|
| 600987 | 2017 | 0.646 | 0.05 | 0.814667 | 0.66368197 | 22.30246 | 0.179981 | 34.26 |
| 2637   | 2017 | 0.615 | 0.05 | 0.814667 | 0.66368197 | 22.57475 | 0.057845 | 16.58 |
| 300113 | 2017 | 1.634 | 0.05 | 0.814667 | 0.66368197 | 22.10468 | 0.192403 | 40.37 |
| 600987 | 2017 | -0.52 | 0.05 | 0.814667 | 0.66368197 | 22.30246 | 0.179981 | 34.26 |
| 2552   | 2017 | -0.24 | 0.05 | 0.814667 | 0.66368197 | 20.60836 | -0.22784 | 32.17 |
| 2364   | 2017 | 0.06  | 0.05 | 0.814667 | 0.66368197 | 21.70655 | 0.024834 | 35.56 |
| 600987 | 2017 | 0.646 | 0.05 | 0.814667 | 0.66368197 | 22.30246 | 0.179981 | 34.26 |
| 2276   | 2017 | -0.45 | 0.05 | 0.814667 | 0.66368197 | 22.67533 | 0.027395 | 30.41 |
| 2430   | 2017 | 0.018 | 0.05 | 0.814667 | 0.66368197 | 23.12924 | 0.076223 | 54.4  |
| 603816 | 2017 | -0.9  | 0.05 | 0.814667 | 0.66368197 | 22.6044  | 0.206367 | 49.1  |
| 559    | 2017 | -0.59 | 0.05 | 0.814667 | 0.66368197 | 23.16816 | 0.17127  | 56.5  |
| 2122   | 2017 | -0.4  | 0.05 | 0.814667 | 0.66368197 | 22.87529 | 0.01112  | 29.97 |
| 600704 | 2017 | 0.371 | 0.05 | 0.814667 | 0.66368197 | 25.17696 | 0.111454 | 33.81 |
| 600797 | 2017 | -0.56 | 0.05 | 0.814667 | 0.66368197 | 22.60008 | 0.069747 | 17.01 |
| 2479   | 2017 | -0.37 | 0.05 | 0.814667 | 0.66368197 | 22.35258 | 0.128371 | 38    |
| 300266 | 2017 | -0.01 | 0.05 | 0.814667 | 0.66368197 | 22.97223 | 0.092004 | 34.35 |
| 300582 | 2017 | 0.22  | 0.05 | 0.814667 | 0.66368197 | 21.11104 | 0.027009 | 37.96 |
| 603556 | 2017 | 0.728 | 0.05 | 0.814667 | 0.66368197 | 22.58791 | 0.120085 | 48.5  |
| 300020 | 2017 | 1.12  | 0.05 | 0.814667 | 0.66368197 | 22.52545 | 0.040373 | 24.34 |
| 2010   | 2017 | -0.66 | 0.05 | 0.814667 | 0.66368197 | 23.9046  | 0.043158 | 60.56 |
| 600576 | 2017 | 1.226 | 0.05 | 0.814667 | 0.66368197 | 21.45824 | 0.049198 | 29.58 |
| 300078 | 2017 | 0.671 | 0.05 | 0.814667 | 0.66368197 | 21.78856 | 0.062107 | 16.33 |
| 600704 | 2017 | 0.371 | 0.05 | 0.814667 | 0.66368197 | 25.17696 | 0.111454 | 33.81 |
| 300133 | 2017 | 0.485 | 0.05 | 0.814667 | 0.66368197 | 22.84611 | 0.090756 | 26.34 |
| 2364   | 2017 | 0.771 | 0.05 | 0.814667 | 0.66368197 | 21.70655 | 0.024834 | 35.56 |
| 300020 | 2017 | 1.226 | 0.05 | 0.814667 | 0.66368197 | 22.52545 | 0.040373 | 24.34 |
| 600633 | 2017 | 2.3   | 0.05 | 0.814667 | 0.66368197 | 23.01439 | 0.19973  | 46.32 |
| 600570 | 2017 | 2.447 | 0.05 | 0.814667 | 0.66368197 | 22.49008 | 0.131869 | 20.72 |
| 2415   | 2017 | 0.212 | 0.05 | 0.814667 | 0.66368197 | 24.66623 | 0.302158 | 39.59 |
| 603806 | 2017 | 0.724 | 0.05 | 0.814667 | 0.66368197 | 22.46432 | 0.116369 | 56.29 |
| 2767   | 2017 | 0.084 | 0.05 | 0.814667 | 0.66368197 | 20.5194  | 0.066038 | 49.06 |
| 2415   | 2017 | 0.218 | 0.05 | 0.814667 | 0.66368197 | 24.66623 | 0.302158 | 39.59 |
| 603816 | 2017 | -0.9  | 0.05 | 0.814667 | 0.66368197 | 22.6044  | 0.206367 | 49.1  |
| 2415   | 2017 | 0.212 | 0.05 | 0.814667 | 0.66368197 | 24.66623 | 0.302158 | 39.59 |
| 300113 | 2017 | 1.634 | 0.05 | 0.814667 | 0.66368197 | 22.10468 | 0.192403 | 40.37 |
| 300078 | 2017 | 0.665 | 0.05 | 0.814667 | 0.66368197 | 21.78856 | 0.062107 | 16.33 |
| 600477 | 2017 | 0.171 | 0.05 | 0.814667 | 0.66368197 | 22.66166 | 0.252524 | 43.65 |
| 603901 | 2017 | -0.52 | 0.05 | 0.814667 | 0.66368197 | 21.56882 | 0.067955 | 42.9  |
| 2418   | 2017 | -0.75 | 0.05 | 0.814667 | 0.66368197 | 22.98458 | 0.100676 | 15.58 |
| 2418   | 2017 | -0.89 | 0.05 | 0.814667 | 0.66368197 | 22.98458 | 0.100676 | 15.58 |
| 2418   | 2017 | -0.6  | 0.05 | 0.814667 | 0.66368197 | 22.98458 | 0.100676 | 15.58 |
| 300078 | 2017 | 0.588 | 0.05 | 0.814667 | 0.66368197 | 21.78856 | 0.062107 | 16.33 |
| 2488   | 2017 | -0.06 | 0.05 | 0.814667 | 0.66368197 | 22.69554 | 0.013052 | 12.52 |
| 300078 | 2017 | 0.588 | 0.05 | 0.814667 | 0.66368197 | 21.78856 | 0.062107 | 16.33 |
| 300078 | 2017 | 0.588 | 0.05 | 0.814667 | 0.66368197 | 21.56467 | 0.062107 | 16.33 |
| 600571 | 2017 | 1.58  | 0.05 | 0.814667 | 0.66368197 | 21.5013  | -0.14534 | 17.76 |
| 2276   | 2017 | -0.46 | 0.05 | 0.814667 | 0.66368197 | 22.67533 | 0.027395 | 30.41 |
| 603901 | 2017 | -0.39 | 0.05 | 0.814667 | 0.66368197 | 21.56882 | 0.067955 | 42.9  |
| 600797 | 2017 | 0.214 | 0.05 | 0.814667 | 0.66368197 | 22.60008 | 0.069747 | 17.01 |
| 603298 | 2017 | -0.61 | 0.05 | 0.814667 | 0.66368197 | 22.36352 | 0.137676 | 44.72 |
| 2570   | 2017 | -0.14 | 0.05 | 0.814667 | 0.66368197 | 22.34394 | -0.4336  | 34.21 |
| 603806 | 2017 | 0.724 | 0.05 | 0.814667 | 0.66368197 | 22.29638 | 0.116369 | 56.29 |
| 603806 | 2017 | 0.724 | 0.05 | 0.814667 | 0.66368197 | 22.46432 | 0.116369 | 56.29 |
| 600571 | 2017 | 2.316 | 0.05 | 0.814667 | 0.66368197 | 21.5013  | -0.14534 | 17.76 |

|        |      |       |      |          |            |          |          |        |
|--------|------|-------|------|----------|------------|----------|----------|--------|
| 2019   | 2017 | -0.09 | 0.05 | 0.814667 | 0.66368197 | 22.89434 | 0.186613 | 43.18  |
| 603298 | 2017 | 0.275 | 0.05 | 0.814667 | 0.66368197 | 22.36352 | 0.137676 | 44.72  |
| 600596 | 2017 | -0.69 | 0.05 | 0.814667 | 0.66368197 | 22.92717 | 0.106973 | 14.42  |
| 300020 | 2017 | 1.226 | 0.05 | 0.814667 | 0.66368197 | 22.52545 | 0.040373 | 24.34  |
| 2430   | 2017 | 0.195 | 0.05 | 0.814667 | 0.66368197 | 23.12924 | 0.076223 | 54.4   |
| 2488   | 2017 | -0.18 | 0.05 | 0.814667 | 0.66368197 | 22.69554 | 0.013052 | 12.52  |
| 300306 | 2017 | 0.725 | 0.05 | 0.814667 | 0.66368197 | 21.54398 | 0.065476 | 27.85  |
| 600126 | 2017 | -0.29 | 0.05 | 0.814667 | 0.66368197 | 23.92018 | 0.108202 | 44.69  |
| 600596 | 2017 | -0.14 | 0.05 | 0.814667 | 0.66368197 | 22.92717 | 0.106973 | 14.42  |
| 2019   | 2017 | -0.19 | 0.05 | 0.814667 | 0.66368197 | 22.89434 | 0.186613 | 43.18  |
| 2570   | 2017 | -0.14 | 0.05 | 0.814667 | 0.66368197 | 22.34394 | -0.4336  | 34.21  |
| 2214   | 2017 | 0.539 | 0.05 | 0.814667 | 0.66368197 | 21.07944 | 0.030128 | 29.1   |
| 2236   | 2017 | 0.631 | 0.05 | 0.814667 | 0.66368197 | 23.78354 | 0.224368 | 38.73  |
| 2019   | 2017 | -0.19 | 0.05 | 0.814667 | 0.66368197 | 22.89434 | 0.186613 | 43.18  |
| 2276   | 2017 | -0.57 | 0.05 | 0.814667 | 0.66368197 | 22.67533 | 0.027395 | 30.41  |
| 600776 | 2017 | 0.208 | 0.05 | 0.814667 | 0.66368197 | 22.05079 | 0.039097 | 45.439 |
| 2534   | 2017 | -0.34 | 0.05 | 0.814667 | 0.66368197 | 22.81526 | 0.132237 | 39     |
| 300270 | 2017 | 0.389 | 0.05 | 0.814667 | 0.66368197 | 20.8272  | 0.064807 | 57.51  |
| 925    | 2017 | 0.604 | 0.05 | 0.814667 | 0.66368197 | 22.51762 | 0.050988 | 10.42  |
| 300244 | 2017 | 0.173 | 0.05 | 0.814667 | 0.66368197 | 22.72335 | 0.15749  | 38.09  |
| 600596 | 2017 | 0.053 | 0.05 | 0.814667 | 0.66368197 | 22.92717 | 0.106973 | 14.42  |
| 607    | 2017 | -0.9  | 0.05 | 0.814667 | 0.66368197 | 21.88661 | 0.10483  | 48.13  |
| 600596 | 2017 | 0.019 | 0.05 | 0.814667 | 0.66368197 | 22.92717 | 0.106973 | 14.42  |
| 600126 | 2017 | -0.19 | 0.05 | 0.814667 | 0.66368197 | 23.92018 | 0.108202 | 44.69  |
| 600704 | 2017 | 0.371 | 0.05 | 0.814667 | 0.66368197 | 24.26545 | 0.111454 | 33.81  |
| 2430   | 2017 | -0    | 0.05 | 0.814667 | 0.66368197 | 23.12924 | 0.076223 | 54.4   |
| 300582 | 2017 | 0.11  | 0.05 | 0.814667 | 0.66368197 | 21.11104 | 0.027009 | 37.96  |
| 2430   | 2017 | 0.195 | 0.05 | 0.814667 | 0.66368197 | 23.12924 | 0.076223 | 54.4   |
| 2430   | 2017 | 0.195 | 0.05 | 0.814667 | 0.66368197 | 22.88751 | 0.076223 | 54.4   |
| 2430   | 2017 | -0.6  | 0.05 | 0.814667 | 0.66368197 | 23.12924 | 0.076223 | 54.4   |
| 2625   | 2017 | 0.309 | 0.05 | 0.814667 | 0.66368197 | 22.83889 | 0.010605 | 42.6   |
| 2430   | 2017 | 0.195 | 0.05 | 0.814667 | 0.66368197 | 23.12924 | 0.076223 | 54.4   |
| 906    | 2017 | -0.96 | 0.05 | 0.814667 | 0.66368197 | 22.8159  | 0.06588  | 38.81  |
| 300203 | 2017 | 0.316 | 0.05 | 0.814667 | 0.66368197 | 22.57612 | 0.144501 | 24.65  |
| 2430   | 2017 | 0.195 | 0.05 | 0.814667 | 0.66368197 | 23.12924 | 0.076223 | 54.4   |
| 2430   | 2017 | -0.6  | 0.05 | 0.814667 | 0.66368197 | 23.12924 | 0.076223 | 54.4   |
| 2364   | 2017 | 0.06  | 0.05 | 0.814667 | 0.66368197 | 21.70655 | 0.024834 | 35.56  |
| 600797 | 2017 | 0.012 | 0.05 | 0.814667 | 0.66368197 | 22.60008 | 0.069747 | 17.01  |
| 300145 | 2017 | 0.027 | 0.05 | 0.814667 | 0.66368197 | 23.01227 | 0.127261 | 26.65  |
| 300068 | 2017 | 0.075 | 0.05 | 0.814667 | 0.66368197 | 23.07093 | 0.067892 | 13.61  |
| 2637   | 2017 | -0.56 | 0.05 | 0.814667 | 0.66368197 | 22.57475 | 0.057845 | 16.58  |
| 2430   | 2017 | -0.6  | 0.05 | 0.814667 | 0.66368197 | 23.12924 | 0.076223 | 54.4   |
| 2247   | 2017 | -0.06 | 0.05 | 0.814667 | 0.66368197 | 22.48566 | 0.095711 | 15.32  |
| 2570   | 2017 | 0.065 | 0.05 | 0.814667 | 0.66368197 | 22.3927  | -0.4336  | 34.21  |
| 600671 | 2017 | -0.48 | 0.05 | 0.814667 | 0.66368197 | 20.10336 | 0.092483 | 24.63  |
| 2364   | 2017 | 0.06  | 0.05 | 0.814667 | 0.66368197 | 21.61781 | 0.024834 | 35.56  |
| 2479   | 2017 | -0.37 | 0.05 | 0.814667 | 0.66368197 | 22.35258 | 0.128371 | 38     |
| 559    | 2017 | -0.3  | 0.05 | 0.814667 | 0.66368197 | 23.16816 | 0.17127  | 56.5   |
| 600776 | 2017 | -0.06 | 0.05 | 0.814667 | 0.66368197 | 22.05079 | 0.039097 | 45.439 |
| 300571 | 2017 | 0.841 | 0.05 | 0.814667 | 0.66368197 | 20.4778  | 0.281115 | 26.51  |
| 2508   | 2017 | -0.18 | 0.05 | 0.814667 | 0.66368197 | 22.76879 | 0.277927 | 49.68  |
| 300068 | 2017 | -0.75 | 0.05 | 0.814667 | 0.66368197 | 23.11152 | 0.067892 | 13.61  |
| 2418   | 2017 | -0.89 | 0.05 | 0.814667 | 0.66368197 | 21.92997 | 0.100676 | 15.58  |
| 2444   | 2017 | 0.031 | 0.05 | 0.814667 | 0.66368197 | 22.79288 | 0.091273 | 44.54  |

|        |      |       |      |          |            |          |          |        |
|--------|------|-------|------|----------|------------|----------|----------|--------|
| 559    | 2017 | 0.127 | 0.05 | 0.814667 | 0.66368197 | 23.16816 | 0.17127  | 56.5   |
| 600797 | 2017 | 0.137 | 0.05 | 0.814667 | 0.66368197 | 22.60008 | 0.069747 | 17.01  |
| 300435 | 2017 | -0.08 | 0.05 | 0.814667 | 0.66368197 | 20.99334 | 0.078668 | 52.6   |
| 559    | 2017 | -0.16 | 0.05 | 0.814667 | 0.66368197 | 23.16816 | 0.17127  | 56.5   |
| 300244 | 2017 | 0.615 | 0.05 | 0.814667 | 0.66368197 | 22.72335 | 0.15749  | 38.09  |
| 300306 | 2017 | 0.181 | 0.05 | 0.814667 | 0.66368197 | 21.54398 | 0.065476 | 27.85  |
| 2010   | 2017 | 0.102 | 0.05 | 0.814667 | 0.66368197 | 23.9046  | 0.043158 | 60.56  |
| 300113 | 2017 | 1.634 | 0.05 | 0.814667 | 0.66368197 | 21.82333 | 0.192403 | 40.37  |
| 600571 | 2017 | 1.82  | 0.05 | 0.814667 | 0.66368197 | 21.5013  | -0.14534 | 17.76  |
| 2767   | 2017 | 0.069 | 0.05 | 0.814667 | 0.66368197 | 20.5194  | 0.066038 | 49.06  |
| 2625   | 2017 | -0.01 | 0.05 | 0.814667 | 0.66368197 | 22.83889 | 0.010605 | 42.6   |
| 2019   | 2017 | -0.19 | 0.05 | 0.814667 | 0.66368197 | 22.89434 | 0.186613 | 43.18  |
| 2534   | 2017 | 0.385 | 0.05 | 0.814667 | 0.66368197 | 22.81526 | 0.132237 | 39     |
| 2430   | 2017 | 0.122 | 0.05 | 0.814667 | 0.66368197 | 23.12924 | 0.076223 | 54.4   |
| 300435 | 2017 | -0.08 | 0.05 | 0.814667 | 0.66368197 | 20.97532 | 0.078668 | 52.6   |
| 2479   | 2017 | -0.37 | 0.05 | 0.814667 | 0.66368197 | 22.02992 | 0.128371 | 38     |
| 600477 | 2017 | -0.01 | 0.05 | 0.814667 | 0.66368197 | 22.27368 | 0.252524 | 43.65  |
| 603558 | 2017 | -0.24 | 0.05 | 0.814667 | 0.66368197 | 21.91215 | 0.047402 | 40.09  |
| 2444   | 2017 | 0.195 | 0.05 | 0.814667 | 0.66368197 | 22.79288 | 0.091273 | 44.54  |
| 600776 | 2017 | 0.361 | 0.05 | 0.814667 | 0.66368197 | 22.05079 | 0.039097 | 45.439 |
| 300244 | 2017 | 0.615 | 0.05 | 0.814667 | 0.66368197 | 22.72335 | 0.15749  | 38.09  |
| 2637   | 2017 | 0.66  | 0.05 | 0.814667 | 0.66368197 | 22.57475 | 0.057845 | 16.58  |
| 600987 | 2017 | -0.53 | 0.05 | 0.814667 | 0.66368197 | 22.30246 | 0.179981 | 34.26  |
| 2019   | 2017 | -0.19 | 0.05 | 0.814667 | 0.66368197 | 22.89434 | 0.186613 | 43.18  |
| 909    | 2017 | 0.616 | 0.05 | 0.814667 | 0.66368197 | 22.091   | 0.055781 | 45.33  |
| 603901 | 2017 | -0.63 | 0.05 | 0.814667 | 0.66368197 | 21.56882 | 0.067955 | 42.9   |
| 600460 | 2017 | 0.028 | 0.05 | 0.814667 | 0.66368197 | 22.55655 | 0.032368 | 41.17  |
| 300459 | 2017 | 0.598 | 0.05 | 0.814667 | 0.66368197 | 23.09618 | 0.042864 | 18.29  |
| 300459 | 2017 | 1.468 | 0.05 | 0.814667 | 0.66368197 | 23.09618 | 0.042864 | 18.29  |
| 2247   | 2017 | -0.06 | 0.05 | 0.814667 | 0.66368197 | 22.48566 | 0.095711 | 15.32  |
| 600797 | 2017 | 0.279 | 0.05 | 0.814667 | 0.66368197 | 22.30258 | 0.069747 | 17.01  |
| 2415   | 2017 | 1.537 | 0.05 | 0.814667 | 0.66368197 | 24.66623 | 0.302158 | 39.59  |
| 2552   | 2017 | -0.24 | 0.05 | 0.814667 | 0.66368197 | 20.47118 | -0.22784 | 32.17  |
| 2444   | 2017 | -0.63 | 0.05 | 0.814667 | 0.66368197 | 22.79288 | 0.091273 | 44.54  |
| 2019   | 2017 | -0.19 | 0.05 | 0.814667 | 0.66368197 | 22.89434 | 0.186613 | 43.18  |
| 300078 | 2017 | 0.52  | 0.05 | 0.814667 | 0.66368197 | 21.78856 | 0.062107 | 16.33  |
| 2534   | 2017 | 0.385 | 0.05 | 0.814667 | 0.66368197 | 22.81526 | 0.132237 | 39     |
| 2534   | 2017 | 0.213 | 0.05 | 0.814667 | 0.66368197 | 22.81526 | 0.132237 | 39     |
| 300459 | 2017 | 0.64  | 0.05 | 0.814667 | 0.66368197 | 23.09618 | 0.042864 | 18.29  |
| 559    | 2017 | 0.054 | 0.05 | 0.814667 | 0.66368197 | 23.16816 | 0.17127  | 56.5   |
| 300203 | 2017 | 0.316 | 0.05 | 0.814667 | 0.66368197 | 22.57612 | 0.144501 | 24.65  |
| 300459 | 2017 | 0.64  | 0.05 | 0.814667 | 0.66368197 | 23.01748 | 0.042864 | 18.29  |
| 601177 | 2017 | -0.44 | 0.05 | 0.814667 | 0.66368197 | 22.05614 | 0.016046 | 45.01  |
| 300145 | 2017 | 0.273 | 0.05 | 0.814667 | 0.66368197 | 23.01227 | 0.127261 | 26.65  |
| 607    | 2017 | -0.9  | 0.05 | 0.814667 | 0.66368197 | 21.88661 | 0.10483  | 48.13  |
| 2534   | 2017 | 0.245 | 0.05 | 0.814667 | 0.66368197 | 22.81526 | 0.132237 | 39     |
| 600570 | 2017 | 1.932 | 0.05 | 0.814667 | 0.66368197 | 22.49008 | 0.131869 | 20.72  |
| 600570 | 2017 | 2.594 | 0.05 | 0.814667 | 0.66368197 | 22.49008 | 0.131869 | 20.72  |
| 600570 | 2017 | 2.594 | 0.05 | 0.814667 | 0.66368197 | 22.49008 | 0.131869 | 20.72  |
| 2415   | 2017 | 1.39  | 0.05 | 0.814667 | 0.66368197 | 24.31601 | 0.302158 | 39.59  |
| 603816 | 2017 | -0.83 | 0.05 | 0.814667 | 0.66368197 | 22.6044  | 0.206367 | 49.1   |
| 2284   | 2017 | -0.35 | 0.05 | 0.814667 | 0.66368197 | 22.45769 | 0.030322 | 38.82  |
| 601177 | 2017 | -0.44 | 0.05 | 0.814667 | 0.66368197 | 22.05614 | 0.016046 | 45.01  |
| 2010   | 2017 | 0.666 | 0.05 | 0.814667 | 0.66368197 | 23.9046  | 0.043158 | 60.56  |

|        |      |       |      |          |            |          |          |        |
|--------|------|-------|------|----------|------------|----------|----------|--------|
| 600570 | 2017 | 2.036 | 0.05 | 0.814667 | 0.66368197 | 22.49008 | 0.131869 | 20.72  |
| 600571 | 2017 | 0.992 | 0.05 | 0.814667 | 0.66368197 | 21.5013  | -0.14534 | 17.76  |
| 2637   | 2017 | 0.208 | 0.05 | 0.814667 | 0.66368197 | 22.57475 | 0.057845 | 16.58  |
| 300244 | 2017 | 0.615 | 0.05 | 0.814667 | 0.66368197 | 22.72335 | 0.15749  | 38.09  |
| 2415   | 2017 | 1.206 | 0.05 | 0.814667 | 0.66368197 | 24.66623 | 0.302158 | 39.59  |
| 600671 | 2017 | -0.33 | 0.05 | 0.814667 | 0.66368197 | 20.10336 | 0.092483 | 24.63  |
| 600677 | 2017 | -0.56 | 0.05 | 0.814667 | 0.66368197 | 23.18899 | -0.38817 | 19.2   |
| 600987 | 2017 | 0.646 | 0.05 | 0.814667 | 0.66368197 | 22.30246 | 0.179981 | 34.26  |
| 300266 | 2017 | 0.477 | 0.05 | 0.814667 | 0.66368197 | 22.97223 | 0.092004 | 34.35  |
| 2637   | 2017 | -0.56 | 0.05 | 0.814667 | 0.66368197 | 22.57475 | 0.057845 | 16.58  |
| 909    | 2017 | 0.438 | 0.05 | 0.814667 | 0.66368197 | 22.091   | 0.055781 | 45.33  |
| 603901 | 2017 | -0.56 | 0.05 | 0.814667 | 0.66368197 | 21.4613  | 0.067955 | 42.9   |
| 2236   | 2017 | 1.046 | 0.05 | 0.814667 | 0.66368197 | 23.78354 | 0.224368 | 38.73  |
| 2637   | 2017 | 0.66  | 0.05 | 0.814667 | 0.66368197 | 22.57475 | 0.057845 | 16.58  |
| 2570   | 2017 | -0.14 | 0.05 | 0.814667 | 0.66368197 | 22.34394 | -0.4336  | 34.21  |
| 300347 | 2017 | 0.695 | 0.05 | 0.814667 | 0.66368197 | 21.99951 | 0.117834 | 26.82  |
| 600126 | 2017 | -0.19 | 0.05 | 0.814667 | 0.66368197 | 23.92018 | 0.108202 | 44.69  |
| 2430   | 2017 | -0.6  | 0.05 | 0.814667 | 0.66368197 | 23.12924 | 0.076223 | 54.4   |
| 963    | 2017 | 0.283 | 0.05 | 0.814667 | 0.66368197 | 23.49505 | 0.214354 | 41.77  |
| 2364   | 2017 | 1.385 | 0.05 | 0.814667 | 0.66368197 | 21.70655 | 0.024834 | 35.56  |
| 600576 | 2017 | 1.226 | 0.05 | 0.814667 | 0.66368197 | 21.30528 | 0.049198 | 29.58  |
| 2479   | 2017 | -0.31 | 0.05 | 0.814667 | 0.66368197 | 22.35258 | 0.128371 | 38     |
| 300145 | 2017 | 0.273 | 0.05 | 0.814667 | 0.66368197 | 23.01227 | 0.127261 | 26.65  |
| 2637   | 2017 | 0.66  | 0.05 | 0.814667 | 0.66368197 | 22.07104 | 0.057845 | 16.58  |
| 300478 | 2017 | 0.246 | 0.05 | 0.814667 | 0.66368197 | 21.03651 | 0.075331 | 38.25  |
| 600570 | 2017 | 2.594 | 0.05 | 0.814667 | 0.66368197 | 22.49008 | 0.131869 | 20.72  |
| 603298 | 2017 | 0.128 | 0.05 | 0.814667 | 0.66368197 | 22.36352 | 0.137676 | 44.72  |
| 300553 | 2017 | 0.826 | 0.05 | 0.814667 | 0.66368197 | 20.10336 | 0.065726 | 14.21  |
| 2266   | 2017 | -0.11 | 0.05 | 0.814667 | 0.66368197 | 22.77062 | 0.031173 | 20.22  |
| 300068 | 2017 | -0.22 | 0.05 | 0.814667 | 0.66368197 | 23.11152 | 0.067892 | 13.61  |
| 2552   | 2017 | 0.197 | 0.05 | 0.814667 | 0.66368197 | 20.60836 | -0.22784 | 32.17  |
| 300068 | 2017 | 0.175 | 0.05 | 0.814667 | 0.66368197 | 23.11152 | 0.067892 | 13.61  |
| 2280   | 2017 | 0.156 | 0.05 | 0.814667 | 0.66368197 | 23.05115 | 0.007088 | 22.42  |
| 909    | 2017 | 0.438 | 0.05 | 0.814667 | 0.66368197 | 22.091   | 0.055781 | 45.33  |
| 2010   | 2017 | -0.66 | 0.05 | 0.814667 | 0.66368197 | 23.9046  | 0.043158 | 60.56  |
| 2266   | 2017 | -0.29 | 0.05 | 0.814667 | 0.66368197 | 22.77062 | 0.031173 | 20.22  |
| 600776 | 2017 | 0.041 | 0.05 | 0.814667 | 0.66368197 | 22.05079 | 0.039097 | 45.439 |
| 600633 | 2017 | 2.3   | 0.05 | 0.814667 | 0.66368197 | 23.01439 | 0.19973  | 46.32  |
| 2019   | 2017 | -0.19 | 0.05 | 0.814667 | 0.66368197 | 22.89434 | 0.186613 | 43.18  |
| 2247   | 2017 | -0.06 | 0.05 | 0.814667 | 0.66368197 | 22.48566 | 0.095711 | 15.32  |
| 300550 | 2017 | 1.661 | 0.05 | 0.814667 | 0.66368197 | 20.35643 | 0.064908 | 56.29  |
| 559    | 2017 | 0.072 | 0.05 | 0.814667 | 0.66368197 | 23.16816 | 0.17127  | 56.5   |
| 2247   | 2017 | -0.06 | 0.05 | 0.814667 | 0.66368197 | 22.48566 | 0.095711 | 15.32  |
| 963    | 2017 | 0.283 | 0.05 | 0.814667 | 0.66368197 | 23.49505 | 0.214354 | 41.77  |
| 2284   | 2017 | -0.58 | 0.05 | 0.814667 | 0.66368197 | 22.55617 | 0.030322 | 38.82  |
| 559    | 2017 | -0.37 | 0.05 | 0.814667 | 0.66368197 | 23.16816 | 0.17127  | 56.5   |
| 2236   | 2017 | 1.112 | 0.05 | 0.814667 | 0.66368197 | 23.78354 | 0.224368 | 38.73  |
| 2552   | 2017 | 0.33  | 0.05 | 0.814667 | 0.66368197 | 20.60836 | -0.22784 | 32.17  |
| 603258 | 2017 | 2.535 | 0.05 | 0.814667 | 0.66368197 | 21.37295 | 0.099545 | 11.78  |
| 2236   | 2017 | 1.249 | 0.05 | 0.814667 | 0.66368197 | 23.78354 | 0.224368 | 38.73  |
| 2019   | 2017 | -0.09 | 0.05 | 0.814667 | 0.66368197 | 22.89434 | 0.186613 | 43.18  |
| 603806 | 2017 | 0.228 | 0.05 | 0.814667 | 0.66368197 | 22.46432 | 0.116369 | 56.29  |
| 2115   | 2017 | 0.994 | 0.05 | 0.814667 | 0.66368197 | 22.19015 | 0.024125 | 15.6   |
| 600126 | 2017 | -0.19 | 0.05 | 0.814667 | 0.66368197 | 23.92018 | 0.108202 | 44.69  |

|        |      |       |      |          |            |          |          |       |
|--------|------|-------|------|----------|------------|----------|----------|-------|
| 2284   | 2017 | -0.35 | 0.05 | 0.814667 | 0.66368197 | 22.55617 | 0.030322 | 38.82 |
| 2534   | 2017 | 0.168 | 0.05 | 0.814667 | 0.66368197 | 22.81526 | 0.132237 | 39    |
| 2122   | 2017 | -0.4  | 0.05 | 0.814667 | 0.66368197 | 22.87529 | 0.01112  | 29.97 |
| 603298 | 2017 | -0.61 | 0.05 | 0.814667 | 0.66368197 | 22.36352 | 0.137676 | 44.72 |
| 925    | 2017 | -0.26 | 0.05 | 0.814667 | 0.66368197 | 22.51762 | 0.050988 | 10.42 |
| 300244 | 2017 | 0.615 | 0.05 | 0.814667 | 0.66368197 | 22.72335 | 0.15749  | 38.09 |
| 2214   | 2017 | 1.422 | 0.05 | 0.814667 | 0.66368197 | 21.07916 | 0.030128 | 29.1  |
| 300145 | 2017 | 0.054 | 0.05 | 0.814667 | 0.66368197 | 23.01227 | 0.127261 | 26.65 |
| 2019   | 2017 | -0.19 | 0.05 | 0.814667 | 0.66368197 | 22.89434 | 0.186613 | 43.18 |
| 603816 | 2017 | -0.9  | 0.05 | 0.814667 | 0.66368197 | 22.6044  | 0.206367 | 49.1  |
| 2010   | 2017 | 0.556 | 0.05 | 0.814667 | 0.66368197 | 23.9046  | 0.043158 | 60.56 |
| 600570 | 2017 | 2.594 | 0.05 | 0.814667 | 0.66368197 | 22.49008 | 0.131869 | 20.72 |
| 300250 | 2017 | 1.454 | 0.05 | 0.814667 | 0.66368197 | 21.33882 | 0.046081 | 42.31 |
| 2135   | 2017 | 0.048 | 0.05 | 0.814667 | 0.66368197 | 23.03428 | 0.026814 | 30.41 |
| 300068 | 2017 | -0.07 | 0.05 | 0.814667 | 0.66368197 | 23.11152 | 0.067892 | 13.61 |
| 2493   | 2017 | 0.236 | 0.05 | 0.814667 | 0.66368197 | 24.85127 | 0.080423 | 70.36 |
| 300250 | 2017 | 1.85  | 0.05 | 0.814667 | 0.66368197 | 21.33882 | 0.046081 | 42.31 |
| 2508   | 2017 | -0.18 | 0.05 | 0.814667 | 0.66368197 | 22.79349 | 0.277927 | 49.68 |
| 600571 | 2017 | 1.58  | 0.05 | 0.814667 | 0.66368197 | 21.32787 | -0.14534 | 17.76 |
| 603806 | 2017 | 0.63  | 0.05 | 0.814667 | 0.66368197 | 22.46432 | 0.116369 | 56.29 |
| 603806 | 2017 | 0.724 | 0.05 | 0.814667 | 0.66368197 | 22.46432 | 0.116369 | 56.29 |
| 2236   | 2017 | 0.366 | 0.05 | 0.814667 | 0.66368197 | 23.78354 | 0.224368 | 38.73 |
| 2415   | 2017 | 0.217 | 0.05 | 0.814667 | 0.66368197 | 24.66623 | 0.302158 | 39.59 |
| 2430   | 2017 | 0.062 | 0.05 | 0.814667 | 0.66368197 | 23.12924 | 0.076223 | 54.4  |
| 300250 | 2017 | 1.85  | 0.05 | 0.814667 | 0.66368197 | 21.33882 | 0.046081 | 42.31 |
| 603298 | 2017 | -0.61 | 0.05 | 0.814667 | 0.66368197 | 22.36352 | 0.137676 | 44.72 |
| 300020 | 2017 | 1.226 | 0.05 | 0.814667 | 0.66368197 | 22.52545 | 0.040373 | 24.34 |
| 2570   | 2017 | 0.426 | 0.05 | 0.814667 | 0.66368197 | 22.34394 | -0.4336  | 34.21 |
| 2284   | 2017 | -0.01 | 0.05 | 0.814667 | 0.66368197 | 22.55617 | 0.030322 | 38.82 |
| 2276   | 2017 | -0.24 | 0.05 | 0.814667 | 0.66368197 | 22.67533 | 0.027395 | 30.41 |
| 600460 | 2017 | 0.894 | 0.05 | 0.814667 | 0.66368197 | 22.55655 | 0.032368 | 41.17 |
| 300244 | 2017 | 0.459 | 0.05 | 0.814667 | 0.66368197 | 22.35301 | 0.15749  | 38.09 |
| 603298 | 2017 | 0.717 | 0.05 | 0.814667 | 0.66368197 | 22.36352 | 0.137676 | 44.72 |
| 300020 | 2017 | 1.226 | 0.05 | 0.814667 | 0.66368197 | 22.52545 | 0.040373 | 24.34 |
| 963    | 2017 | 0.283 | 0.05 | 0.814667 | 0.66368197 | 23.49505 | 0.214354 | 41.77 |
| 300203 | 2017 | 0.117 | 0.05 | 0.814667 | 0.66368197 | 22.57612 | 0.144501 | 24.65 |
| 300360 | 2017 | -0.35 | 0.05 | 0.814667 | 0.66368197 | 21.6597  | 0.076491 | 22.81 |
| 603816 | 2017 | -0.89 | 0.05 | 0.814667 | 0.66368197 | 22.6044  | 0.206367 | 49.1  |
| 2135   | 2017 | -0.27 | 0.05 | 0.814667 | 0.66368197 | 22.83133 | 0.026814 | 30.41 |
| 2637   | 2017 | -0.48 | 0.05 | 0.814667 | 0.66368197 | 22.57475 | 0.057845 | 16.58 |
| 2364   | 2017 | 0.722 | 0.05 | 0.814667 | 0.66368197 | 21.70655 | 0.024834 | 35.56 |
| 300300 | 2017 | 1.736 | 0.05 | 0.814667 | 0.66368197 | 21.94408 | 0.039523 | 47.73 |
| 600596 | 2017 | -0.07 | 0.05 | 0.814667 | 0.66368197 | 22.92717 | 0.106973 | 14.42 |
| 600704 | 2017 | 0.371 | 0.05 | 0.814667 | 0.66368197 | 25.17696 | 0.111454 | 33.81 |
| 2266   | 2017 | 0.116 | 0.05 | 0.814667 | 0.66368197 | 22.77062 | 0.031173 | 20.22 |
| 909    | 2017 | 0.656 | 0.05 | 0.814667 | 0.66368197 | 22.091   | 0.055781 | 45.33 |
| 300360 | 2017 | -0.35 | 0.05 | 0.814667 | 0.66368197 | 21.6597  | 0.076491 | 22.81 |
| 300306 | 2017 | 0.512 | 0.05 | 0.814667 | 0.66368197 | 21.54398 | 0.065476 | 27.85 |
| 603901 | 2017 | -0.52 | 0.05 | 0.814667 | 0.66368197 | 21.56882 | 0.067955 | 42.9  |
| 2444   | 2017 | -0.62 | 0.05 | 0.814667 | 0.66368197 | 22.79288 | 0.091273 | 44.54 |
| 603823 | 2017 | 0.171 | 0.05 | 0.814667 | 0.66368197 | 21.44052 | 0.109218 | 64.45 |
| 600671 | 2017 | -0.33 | 0.05 | 0.814667 | 0.66368197 | 20.10336 | 0.092483 | 24.63 |
| 2266   | 2017 | 0.092 | 0.05 | 0.814667 | 0.66368197 | 22.77062 | 0.031173 | 20.22 |
| 603901 | 2017 | -0.44 | 0.05 | 0.814667 | 0.66368197 | 21.56882 | 0.067955 | 42.9  |

|        |      |       |      |          |            |          |          |        |
|--------|------|-------|------|----------|------------|----------|----------|--------|
| 600677 | 2017 | -0.09 | 0.05 | 0.814667 | 0.66368197 | 23.18899 | -0.38817 | 19.2   |
| 600596 | 2017 | -0.69 | 0.05 | 0.814667 | 0.66368197 | 22.92717 | 0.106973 | 14.42  |
| 2276   | 2017 | -0.57 | 0.05 | 0.814667 | 0.66368197 | 22.42558 | 0.027395 | 30.41  |
| 600126 | 2017 | -0.19 | 0.05 | 0.814667 | 0.66368197 | 23.92018 | 0.108202 | 44.69  |
| 300550 | 2017 | 1.661 | 0.05 | 0.814667 | 0.66368197 | 20.35643 | 0.064908 | 56.29  |
| 156    | 2017 | 0.397 | 0.05 | 0.814667 | 0.66368197 | 23.3919  | 0.019885 | 41.85  |
| 2284   | 2017 | -0.58 | 0.05 | 0.814667 | 0.66368197 | 22.55617 | 0.030322 | 38.82  |
| 2444   | 2017 | 0.031 | 0.05 | 0.814667 | 0.66368197 | 22.79288 | 0.091273 | 44.54  |
| 300078 | 2017 | 0.481 | 0.05 | 0.814667 | 0.66368197 | 21.78856 | 0.062107 | 16.33  |
| 2236   | 2017 | 0.449 | 0.05 | 0.814667 | 0.66368197 | 23.2826  | 0.224368 | 38.73  |
| 603558 | 2017 | -0.74 | 0.05 | 0.814667 | 0.66368197 | 21.91215 | 0.047402 | 40.09  |
| 963    | 2017 | 0.283 | 0.05 | 0.814667 | 0.66368197 | 23.49505 | 0.214354 | 41.77  |
| 600596 | 2017 | -0.69 | 0.05 | 0.814667 | 0.66368197 | 22.52526 | 0.106973 | 14.42  |
| 2122   | 2017 | -0.05 | 0.05 | 0.814667 | 0.66368197 | 22.87529 | 0.01112  | 29.97  |
| 600460 | 2017 | 0.028 | 0.05 | 0.814667 | 0.66368197 | 22.55655 | 0.032368 | 41.17  |
| 600126 | 2017 | -0.19 | 0.05 | 0.814667 | 0.66368197 | 23.92018 | 0.108202 | 44.69  |
| 300582 | 2017 | -0.03 | 0.05 | 0.814667 | 0.66368197 | 21.11104 | 0.027009 | 37.96  |
| 300020 | 2017 | 1.226 | 0.05 | 0.814667 | 0.66368197 | 22.56198 | 0.040373 | 24.34  |
| 2493   | 2017 | 0.622 | 0.05 | 0.814667 | 0.66368197 | 24.85127 | 0.080423 | 70.36  |
| 2284   | 2017 | -0.4  | 0.05 | 0.814667 | 0.66368197 | 22.55617 | 0.030322 | 38.82  |
| 600126 | 2017 | 0.504 | 0.05 | 0.814667 | 0.66368197 | 23.92018 | 0.108202 | 44.69  |
| 300025 | 2017 | -0.44 | 0.05 | 0.814667 | 0.66368197 | 21.82484 | -0.18791 | 11.71  |
| 600776 | 2017 | 0.14  | 0.05 | 0.814667 | 0.66368197 | 22.05079 | 0.039097 | 45.439 |
| 600633 | 2017 | 2.3   | 0.05 | 0.814667 | 0.66368197 | 23.01439 | 0.19973  | 46.32  |
| 300553 | 2017 | 0.826 | 0.05 | 0.814667 | 0.66368197 | 20.10336 | 0.065726 | 14.21  |
| 300203 | 2017 | 0.448 | 0.05 | 0.814667 | 0.66368197 | 22.34074 | 0.144501 | 24.65  |
| 300250 | 2017 | 1.754 | 0.05 | 0.814667 | 0.66368197 | 21.24564 | 0.046081 | 42.31  |
| 300250 | 2017 | 1.85  | 0.05 | 0.814667 | 0.66368197 | 21.33882 | 0.046081 | 42.31  |
| 300020 | 2017 | -0.1  | 0.05 | 0.814667 | 0.66368197 | 22.52545 | 0.040373 | 24.34  |
| 2625   | 2017 | -0.01 | 0.05 | 0.814667 | 0.66368197 | 22.83889 | 0.010605 | 42.6   |
| 300459 | 2017 | 1.468 | 0.05 | 0.814667 | 0.66368197 | 23.09618 | 0.042864 | 18.29  |
| 300512 | 2017 | 0.187 | 0.05 | 0.814667 | 0.66368197 | 21.46736 | 0.132363 | 38.53  |
| 2019   | 2017 | -0.19 | 0.05 | 0.814667 | 0.66368197 | 22.89434 | 0.186613 | 43.18  |
| 600987 | 2017 | 0.646 | 0.05 | 0.814667 | 0.66368197 | 22.30246 | 0.179981 | 34.26  |
| 600677 | 2017 | -0.09 | 0.05 | 0.814667 | 0.66368197 | 23.18899 | -0.38817 | 19.2   |
| 300270 | 2017 | 0.389 | 0.05 | 0.814667 | 0.66368197 | 20.84004 | 0.064807 | 57.51  |
| 300512 | 2017 | 0.187 | 0.05 | 0.814667 | 0.66368197 | 21.43    | 0.132363 | 38.53  |
| 300266 | 2017 | 0.603 | 0.05 | 0.814667 | 0.66368197 | 22.97223 | 0.092004 | 34.35  |
| 600677 | 2017 | -0.56 | 0.05 | 0.814667 | 0.66368197 | 23.18899 | -0.38817 | 19.2   |
| 600797 | 2017 | 0.012 | 0.05 | 0.814667 | 0.66368197 | 22.60008 | 0.069747 | 17.01  |
| 300582 | 2017 | 0.094 | 0.05 | 0.814667 | 0.66368197 | 21.11104 | 0.027009 | 37.96  |
| 600570 | 2017 | 2.594 | 0.05 | 0.814667 | 0.66368197 | 22.49008 | 0.131869 | 20.72  |
| 300347 | 2017 | 0.695 | 0.05 | 0.814667 | 0.66368197 | 21.7834  | 0.117834 | 26.82  |
| 300582 | 2017 | 0.22  | 0.05 | 0.814667 | 0.66368197 | 21.05461 | 0.027009 | 37.96  |
| 2010   | 2017 | 0.666 | 0.05 | 0.814667 | 0.66368197 | 23.9046  | 0.043158 | 60.56  |
| 300478 | 2017 | 0.246 | 0.05 | 0.814667 | 0.66368197 | 20.91611 | 0.075331 | 38.25  |
| 600477 | 2017 | -0.2  | 0.05 | 0.814667 | 0.66368197 | 22.66166 | 0.252524 | 43.65  |
| 300306 | 2017 | 0.623 | 0.05 | 0.814667 | 0.66368197 | 21.54398 | 0.065476 | 27.85  |
| 2444   | 2017 | 0.031 | 0.05 | 0.814667 | 0.66368197 | 22.79288 | 0.091273 | 44.54  |
| 300250 | 2017 | 1.85  | 0.05 | 0.814667 | 0.66368197 | 21.33882 | 0.046081 | 42.31  |
| 603558 | 2017 | -0.51 | 0.05 | 0.814667 | 0.66368197 | 21.91215 | 0.047402 | 40.09  |
| 600776 | 2017 | 1.024 | 0.05 | 0.814667 | 0.66368197 | 21.93394 | 0.039097 | 45.439 |
| 300300 | 2017 | 1.736 | 0.05 | 0.814667 | 0.66368197 | 21.94408 | 0.039523 | 47.73  |
| 906    | 2017 | -0.96 | 0.05 | 0.814667 | 6.64E-01   | 22.8159  | 0.06588  | 38.81  |

|        |      |       |      |          |            |          |          |       |
|--------|------|-------|------|----------|------------|----------|----------|-------|
| 603258 | 2017 | 2.535 | 0.05 | 0.814667 | 6.64E-01   | 21.39729 | 0.099545 | 11.78 |
| 2444   | 2017 | -0.37 | 0.05 | 0.814667 | 6.64E-01   | 22.79288 | 0.091273 | 44.54 |
| 2280   | 2017 | 0.384 | 0.05 | 0.814667 | 6.64E-01   | 23.44341 | 0.007088 | 22.42 |
| 300020 | 2017 | 1.226 | 0.05 | 0.814667 | 6.64E-01   | 22.52545 | 0.040373 | 24.34 |
| 2010   | 2017 | -0.66 | 0.05 | 0.814667 | 6.64E-01   | 23.9046  | 0.043158 | 60.56 |
| 300266 | 2017 | 0.162 | 0.05 | 0.814667 | 6.64E-01   | 22.24024 | 0.092004 | 34.35 |
| 2236   | 2017 | 0.366 | 0.05 | 0.814667 | 6.64E-01   | 23.78354 | 0.224368 | 38.73 |
| 925    | 2017 | 0.604 | 0.05 | 0.814667 | 6.64E-01   | 22.51762 | 0.050988 | 10.42 |
| 2122   | 2017 | -0.05 | 0.05 | 0.814667 | 0.66368197 | 22.87529 | 0.01112  | 29.97 |
| 600671 | 2017 | -0.33 | 0.05 | 0.814667 | 0.66368197 | 20.10336 | 0.092483 | 24.63 |
| 300244 | 2017 | 0.615 | 0.05 | 0.814667 | 0.66368197 | 22.72335 | 0.15749  | 38.09 |
| 300512 | 2017 | 0.055 | 0.05 | 0.814667 | 0.66368197 | 21.46736 | 0.132363 | 38.53 |
| 2801   | 2017 | 0.684 | 0.05 | 0.814667 | 0.66368197 | 20.70867 | 0.128239 | 39.18 |
| 2418   | 2017 | -0.75 | 0.05 | 0.814667 | 0.66368197 | 22.98458 | 0.100676 | 15.58 |
| 601177 | 2017 | 0.354 | 0.05 | 0.814667 | 0.66368197 | 22.05614 | 0.016046 | 45.01 |
| 300078 | 2017 | 0.588 | 0.05 | 0.814667 | 0.66368197 | 21.78856 | 0.062107 | 16.33 |
| 300266 | 2017 | -0.28 | 0.05 | 0.814667 | 0.66368197 | 22.97223 | 0.092004 | 34.35 |
| 300478 | 2017 | 0.246 | 0.05 | 0.814667 | 0.66368197 | 21.03651 | 0.075331 | 38.25 |
| 300068 | 2017 | 0.182 | 0.05 | 0.814667 | 0.66368197 | 23.11152 | 0.067892 | 13.61 |
| 156    | 2017 | 0.581 | 0.05 | 0.814667 | 0.66368197 | 23.3919  | 0.061791 | 41.85 |
| 300113 | 2017 | 1.634 | 0.05 | 0.814667 | 0.66368197 | 22.10468 | 0.192403 | 40.37 |
| 300266 | 2017 | 0.055 | 0.05 | 0.814667 | 0.66368197 | 22.97223 | 0.092004 | 34.35 |
| 300571 | 2017 | 0.841 | 0.05 | 0.814667 | 0.66368197 | 20.10336 | 0.281115 | 26.51 |
| 300266 | 2017 | 0.035 | 0.05 | 0.814667 | 0.66368197 | 22.97223 | 0.092004 | 34.35 |
| 300360 | 2017 | -0.35 | 0.05 | 0.814667 | 0.66368197 | 21.6597  | 0.076491 | 22.81 |
| 2430   | 2017 | 0.195 | 0.05 | 0.814667 | 0.66368197 | 23.12924 | 0.076223 | 54.4  |
| 600596 | 2017 | 0.056 | 0.05 | 0.814667 | 0.66368197 | 22.92717 | 0.106973 | 14.42 |
| 2280   | 2017 | 0.55  | 0.05 | 0.814667 | 0.66368197 | 23.44341 | 0.007088 | 22.42 |
| 600633 | 2017 | 2.3   | 0.05 | 0.814667 | 0.66368197 | 23.01439 | 0.19973  | 46.32 |
| 300078 | 2017 | 0.588 | 0.05 | 0.814667 | 0.66368197 | 21.78856 | 0.062107 | 16.33 |
| 603298 | 2017 | -0.61 | 0.05 | 0.814667 | 0.66368197 | 22.36352 | 0.137676 | 44.72 |
| 300078 | 2017 | 0.588 | 0.05 | 0.814667 | 0.66368197 | 21.78856 | 0.062107 | 16.33 |
| 2444   | 2017 | -0.63 | 0.05 | 0.814667 | 0.66368197 | 22.79288 | 0.091273 | 44.54 |
| 963    | 2017 | 0.151 | 0.05 | 0.814667 | 0.66368197 | 23.49505 | 0.214354 | 41.77 |
| 925    | 2017 | 0.533 | 0.05 | 0.814667 | 0.66368197 | 22.51762 | 0.050988 | 10.42 |
| 603901 | 2017 | -0.41 | 0.05 | 0.814667 | 0.66368197 | 21.56882 | 0.067955 | 42.9  |
| 559    | 2017 | -0.59 | 0.05 | 0.814667 | 0.66368197 | 23.16816 | 0.17127  | 56.5  |
| 300300 | 2017 | 1.621 | 0.05 | 0.814667 | 0.66368197 | 21.94408 | 0.039523 | 47.73 |
| 2276   | 2017 | -0.57 | 0.05 | 0.814667 | 0.66368197 | 22.67533 | 0.027395 | 30.41 |
| 300145 | 2017 | 0.032 | 0.05 | 0.814667 | 0.66368197 | 23.01227 | 0.127261 | 26.65 |
| 600460 | 2017 | 0.641 | 0.05 | 0.814667 | 0.66368197 | 22.55655 | 0.032368 | 41.17 |
| 2010   | 2017 | 0.666 | 0.05 | 0.814667 | 0.66368197 | 23.9046  | 0.043158 | 60.56 |
| 603556 | 2017 | 0.804 | 0.05 | 0.814667 | 0.66368197 | 22.58791 | 0.120085 | 48.5  |
| 2236   | 2017 | 1.046 | 0.05 | 0.814667 | 0.66368197 | 23.78354 | 0.224368 | 38.73 |
| 2019   | 2017 | -0.19 | 0.05 | 0.814667 | 0.66368197 | 22.89434 | 0.186613 | 43.18 |
| 559    | 2017 | -0.59 | 0.05 | 0.814667 | 0.66368197 | 23.16816 | 0.17127  | 56.5  |
| 300068 | 2017 | -0    | 0.05 | 0.814667 | 0.66368197 | 23.11152 | 0.067892 | 13.61 |
| 300025 | 2017 | 0.884 | 0.05 | 0.814667 | 0.66368197 | 21.82484 | -0.18791 | 11.71 |
| 300145 | 2017 | 0.273 | 0.05 | 0.814667 | 0.66368197 | 23.01227 | 0.127261 | 26.65 |
| 2508   | 2017 | -0.18 | 0.05 | 0.814667 | 0.66368197 | 22.79349 | 0.277927 | 49.68 |
| 2444   | 2017 | 0.183 | 0.05 | 0.814667 | 0.66368197 | 22.79288 | 0.091273 | 44.54 |
| 2010   | 2017 | -0.66 | 0.05 | 0.814667 | 0.66368197 | 23.9046  | 0.043158 | 60.56 |
| 300025 | 2017 | 0.884 | 0.05 | 0.814667 | 0.66368197 | 21.82484 | -0.18791 | 11.71 |
| 300068 | 2017 | -0.01 | 0.05 | 0.814667 | 0.66368197 | 23.07093 | 0.067892 | 13.61 |



|        |      |       |      |          |            |          |          |       |
|--------|------|-------|------|----------|------------|----------|----------|-------|
| 2214   | 2017 | 1.296 | 0.05 | 0.814667 | 0.66368197 | 21.07916 | 0.030128 | 29.1  |
| 600570 | 2017 | 2.594 | 0.05 | 0.814667 | 0.66368197 | 22.49008 | 0.131869 | 20.72 |
| 300459 | 2017 | 0.54  | 0.05 | 0.814667 | 0.66368197 | 23.09618 | 0.042864 | 18.29 |
| 300145 | 2017 | 0.046 | 0.05 | 0.814667 | 0.66368197 | 23.01227 | 0.127261 | 26.65 |
| 2284   | 2017 | -0.47 | 0.05 | 0.814667 | 0.66368197 | 22.55617 | 0.030322 | 38.82 |
| 2276   | 2017 | 0.753 | 0.05 | 0.814667 | 0.66368197 | 22.67533 | 0.027395 | 30.41 |
| 2010   | 2017 | 0.666 | 0.05 | 0.814667 | 0.66368197 | 23.9046  | 0.043158 | 60.56 |
| 156    | 2017 | 0.692 | 0.05 | 0.814667 | 0.66368197 | 23.3919  | 0.019885 | 41.85 |
| 559    | 2017 | -0.52 | 0.05 | 0.814667 | 0.66368197 | 23.16816 | 0.17127  | 56.5  |
| 603556 | 2017 | 0.681 | 0.05 | 0.814667 | 0.66368197 | 22.58791 | 0.120085 | 48.5  |
| 2247   | 2017 | -0.06 | 0.05 | 0.814667 | 0.66368197 | 22.48566 | 0.095711 | 15.32 |
| 603823 | 2017 | -0.05 | 0.05 | 0.814667 | 0.66368197 | 21.44052 | 0.109218 | 64.45 |
| 2801   | 2017 | 0.684 | 0.05 | 0.814667 | 0.66368197 | 20.70248 | 0.128239 | 39.18 |
| 2444   | 2017 | -0.42 | 0.05 | 0.814667 | 0.66368197 | 22.79288 | 0.091273 | 44.54 |
| 2552   | 2017 | 0.062 | 0.05 | 0.814667 | 0.66368197 | 20.60836 | -0.22784 | 32.17 |
| 2479   | 2017 | -0.37 | 0.05 | 0.814667 | 0.66368197 | 22.35258 | 0.128371 | 38    |
| 300113 | 2017 | 1.634 | 0.05 | 0.814667 | 0.66368197 | 22.10468 | 0.192403 | 40.37 |
| 600477 | 2017 | -0.2  | 0.05 | 0.814667 | 0.66368197 | 22.66166 | 0.252524 | 43.65 |
| 603823 | 2017 | 0.833 | 0.05 | 0.814667 | 0.66368197 | 21.44052 | 0.109218 | 64.45 |
| 603901 | 2017 | -0.52 | 0.05 | 0.814667 | 0.66368197 | 21.56882 | 0.067955 | 42.9  |
| 2284   | 2017 | 0.298 | 0.05 | 0.814667 | 0.66368197 | 22.55617 | 0.030322 | 38.82 |
| 559    | 2017 | -0.36 | 0.05 | 0.814667 | 0.66368197 | 23.16816 | 0.17127  | 56.5  |
| 600596 | 2017 | -0.12 | 0.05 | 0.814667 | 0.66368197 | 22.92717 | 0.106973 | 14.42 |
| 603901 | 2017 | -0.44 | 0.05 | 0.814667 | 0.66368197 | 21.56882 | 0.067955 | 42.9  |
| 603901 | 2017 | 0.033 | 0.05 | 0.814667 | 0.66368197 | 21.56882 | 0.067955 | 42.9  |
| 963    | 2017 | 0.283 | 0.05 | 0.814667 | 0.66368197 | 23.49505 | 0.214354 | 41.77 |
| 600677 | 2017 | -0.12 | 0.05 | 0.814667 | 0.66368197 | 23.18899 | -0.38817 | 19.2  |
| 559    | 2017 | -0.53 | 0.05 | 0.814667 | 0.66368197 | 23.16816 | 0.17127  | 56.5  |
| 559    | 2017 | -0.59 | 0.05 | 0.814667 | 0.66368197 | 23.16816 | 0.17127  | 56.5  |
| 156    | 2017 | 0.692 | 0.05 | 0.814667 | 0.66368197 | 23.3919  | 0.019885 | 41.85 |
| 600633 | 2017 | 2.3   | 0.05 | 0.814667 | 0.66368197 | 23.01439 | 0.19973  | 46.32 |
| 300078 | 2017 | 0.142 | 0.05 | 0.814667 | 0.66368197 | 21.78856 | 0.062107 | 16.33 |
| 2115   | 2017 | 0.994 | 0.05 | 0.814667 | 0.66368197 | 22.19015 | 0.024125 | 15.6  |
| 600677 | 2017 | -0.56 | 0.05 | 0.814667 | 0.66368197 | 23.18899 | -0.38817 | 19.2  |
| 300512 | 2017 | 0.158 | 0.05 | 0.814667 | 0.66368197 | 21.46736 | 0.132363 | 38.53 |
| 600460 | 2017 | 0.601 | 0.05 | 0.814667 | 0.66368197 | 22.55655 | 0.032368 | 41.17 |
| 2418   | 2017 | -0.75 | 0.05 | 0.814667 | 0.66368197 | 22.98458 | 0.100676 | 15.58 |
| 300145 | 2017 | -0.16 | 0.05 | 0.814667 | 0.66368197 | 23.01227 | 0.127261 | 26.65 |
| 300300 | 2017 | 1.621 | 0.05 | 0.814667 | 0.66368197 | 21.83717 | 0.039523 | 47.73 |
| 300306 | 2017 | 0.181 | 0.05 | 0.814667 | 0.66368197 | 21.54398 | 0.065476 | 27.85 |
| 2010   | 2017 | -0.66 | 0.05 | 0.814667 | 0.66368197 | 23.9046  | 0.043158 | 60.56 |
| 2479   | 2017 | -0.37 | 0.05 | 0.814667 | 0.66368197 | 22.35258 | 0.128371 | 38    |
| 2767   | 2017 | 0.072 | 0.05 | 0.814667 | 0.66368197 | 20.5194  | 0.066038 | 49.06 |
| 300306 | 2017 | 0.606 | 0.05 | 0.814667 | 0.66368197 | 21.54398 | 0.065476 | 27.85 |
| 300033 | 2017 | 2.419 | 0.05 | 0.814667 | 0.66368197 | 21.96334 | 0.228974 | 36    |
| 601177 | 2017 | 0.442 | 0.05 | 0.814667 | 0.66368197 | 22.05614 | 0.016046 | 45.01 |
| 559    | 2017 | -0.02 | 0.05 | 0.814667 | 0.66368197 | 23.16816 | 0.17127  | 56.5  |
| 300347 | 2017 | 0.695 | 0.05 | 0.814667 | 0.66368197 | 21.99951 | 0.117834 | 26.82 |
| 600571 | 2017 | 1.323 | 0.05 | 0.814667 | 0.66368197 | 21.5013  | -0.14534 | 17.76 |
| 300512 | 2017 | 0.187 | 0.05 | 0.814667 | 0.66368197 | 21.46736 | 0.132363 | 38.53 |
| 300300 | 2017 | 0.411 | 0.05 | 0.814667 | 0.66368197 | 21.83717 | 0.039523 | 47.73 |
| 559    | 2017 | 0.204 | 0.05 | 0.814667 | 0.66368197 | 23.16816 | 0.17127  | 56.5  |
| 909    | 2017 | 0.656 | 0.05 | 0.814667 | 0.66368197 | 21.05948 | 0.055781 | 45.33 |
| 2266   | 2017 | -0.57 | 0.05 | 0.814667 | 0.66368197 | 22.77062 | 0.031173 | 20.22 |

|        |      |       |      |          |            |          |          |       |
|--------|------|-------|------|----------|------------|----------|----------|-------|
| 300113 | 2017 | 1.634 | 0.05 | 0.814667 | 0.66368197 | 22.10468 | 0.192403 | 40.37 |
| 2637   | 2017 | 0.762 | 0.05 | 0.814667 | 0.66368197 | 22.57475 | 0.057845 | 16.58 |
| 2115   | 2017 | 0.994 | 0.05 | 0.814667 | 0.66368197 | 22.19015 | 0.024125 | 15.6  |
| 300203 | 2017 | -0.21 | 0.05 | 0.814667 | 0.66368197 | 22.57612 | 0.144501 | 24.65 |
| 600797 | 2017 | -0.05 | 0.05 | 0.814667 | 0.66368197 | 22.60008 | 0.069747 | 17.01 |
| 300571 | 2017 | 0.841 | 0.05 | 0.814667 | 0.66368197 | 20.10336 | 0.281115 | 26.51 |
| 2010   | 2017 | 0.666 | 0.05 | 0.814667 | 0.66368197 | 23.9046  | 0.043158 | 60.56 |
| 607    | 2017 | -0.9  | 0.05 | 0.814667 | 0.66368197 | 21.88661 | 0.10483  | 48.13 |
| 2625   | 2017 | 0.044 | 0.05 | 0.814667 | 0.66368197 | 22.83889 | 0.010605 | 42.6  |
| 2415   | 2017 | 0.218 | 0.05 | 0.814667 | 0.66368197 | 24.66623 | 0.302158 | 39.59 |
| 2767   | 2017 | 0.036 | 0.05 | 0.814667 | 0.66368197 | 20.5194  | 0.066038 | 49.06 |
| 300435 | 2017 | -0.08 | 0.05 | 0.814667 | 0.66368197 | 20.99334 | 0.078668 | 52.6  |
| 600576 | 2017 | 1.226 | 0.05 | 0.814667 | 0.66368197 | 21.45824 | 0.049198 | 29.58 |
| 300203 | 2017 | 0.316 | 0.05 | 0.814667 | 0.66368197 | 22.57612 | 0.144501 | 24.65 |
| 2135   | 2017 | -0    | 0.05 | 0.814667 | 0.66368197 | 23.03428 | 0.026814 | 30.41 |
| 2415   | 2017 | 0.212 | 0.05 | 0.814667 | 0.66368197 | 24.66623 | 0.302158 | 39.59 |
| 2637   | 2017 | 0.66  | 0.05 | 0.814667 | 0.66368197 | 22.57475 | 0.057845 | 16.58 |
| 300266 | 2017 | -0.01 | 0.05 | 0.814667 | 0.66368197 | 22.97223 | 0.092004 | 34.35 |
| 2444   | 2017 | -0.38 | 0.05 | 0.814667 | 0.66368197 | 22.62571 | 0.091273 | 44.54 |
| 600797 | 2017 | 0.012 | 0.05 | 0.814667 | 0.66368197 | 22.60008 | 0.069747 | 17.01 |
| 600797 | 2017 | -0.11 | 0.05 | 0.814667 | 0.66368197 | 22.60008 | 0.069747 | 17.01 |
| 156    | 2017 | 0.643 | 0.05 | 0.814667 | 0.66368197 | 23.3919  | 0.019885 | 41.85 |
| 2135   | 2017 | -0.1  | 0.05 | 0.814667 | 0.66368197 | 23.03428 | 0.026814 | 30.41 |
| 600571 | 2017 | 1.465 | 0.05 | 0.814667 | 0.66368197 | 21.5013  | -0.14534 | 17.76 |
| 2493   | 2017 | 0.622 | 0.05 | 0.814667 | 0.66368197 | 24.85127 | 0.080423 | 70.36 |
| 300144 | 2017 | 0.699 | 0.05 | 0.814667 | 0.66368197 | 22.89285 | 0.142994 | 29.48 |
| 600763 | 2017 | -0.49 | 0.05 | 0.814667 | 0.66368197 | 20.73848 | 0.206214 | 33.75 |
| 2570   | 2017 | -0.14 | 0.05 | 0.814667 | 0.66368197 | 22.34394 | -0.4336  | 34.21 |
| 600987 | 2017 | -0.54 | 0.05 | 0.814667 | 0.66368197 | 22.30246 | 0.179981 | 34.26 |
| 600633 | 2017 | 2.3   | 0.05 | 0.814667 | 0.66368197 | 22.7506  | 0.19973  | 46.32 |
| 603556 | 2017 | 1.103 | 0.05 | 0.814667 | 0.66368197 | 22.58791 | 0.120085 | 48.5  |
| 300203 | 2017 | -0.21 | 0.05 | 0.814667 | 0.66368197 | 22.57612 | 0.144501 | 24.65 |
| 300360 | 2017 | -0.35 | 0.05 | 0.814667 | 0.66368197 | 21.6597  | 0.076491 | 22.81 |
| 603901 | 2017 | -0.36 | 0.05 | 0.814667 | 0.66368197 | 21.56882 | 0.067955 | 42.9  |
| 2247   | 2017 | -0.06 | 0.05 | 0.814667 | 0.66368197 | 22.17768 | 0.095711 | 15.32 |
| 2625   | 2017 | -0.13 | 0.05 | 0.814667 | 0.66368197 | 22.83889 | 0.010605 | 42.6  |
| 2534   | 2017 | 0.104 | 0.05 | 0.814667 | 0.66368197 | 22.81526 | 0.132237 | 39    |
| 603298 | 2017 | 0.275 | 0.05 | 0.814667 | 0.66368197 | 22.36352 | 0.137676 | 44.72 |
| 300250 | 2017 | 1.85  | 0.05 | 0.814667 | 0.66368197 | 21.33882 | 0.046081 | 42.31 |
| 300020 | 2017 | -0.1  | 0.05 | 0.814667 | 6.64E-01   | 22.52545 | 0.040373 | 24.34 |
| 300459 | 2017 | 0.64  | 0.05 | 0.814667 | 6.64E-01   | 23.09618 | 0.042864 | 18.29 |
| 2019   | 2017 | -0.19 | 0.05 | 0.814667 | 6.64E-01   | 22.89434 | 0.186613 | 43.18 |
| 300266 | 2017 | -0    | 0.05 | 0.814667 | 6.64E-01   | 22.97223 | 0.092004 | 34.35 |
| 2570   | 2017 | 0.426 | 0.05 | 0.814667 | 6.64E-01   | 22.34394 | -0.4336  | 34.21 |
| 300459 | 2017 | 0.143 | 0.05 | 0.814667 | 6.64E-01   | 23.09618 | 0.042864 | 18.29 |
| 300512 | 2017 | 0.055 | 0.05 | 0.814667 | 6.64E-01   | 21.46736 | 0.132363 | 38.53 |
| 603258 | 2017 | 2.535 | 0.05 | 0.814667 | 6.64E-01   | 21.37295 | 0.099545 | 11.78 |
| 603816 | 2017 | -0.89 | 0.05 | 0.814667 | 6.64E-01   | 22.6044  | 0.206367 | 49.1  |
| 300459 | 2017 | 0.64  | 0.05 | 0.814667 | 6.64E-01   | 23.09618 | 0.042864 | 18.29 |
| 600596 | 2017 | 0.053 | 0.05 | 0.814667 | 0.66368197 | 22.92717 | 0.106973 | 14.42 |
| 2415   | 2017 | 0.212 | 0.05 | 0.814667 | 0.66368197 | 24.66623 | 0.302158 | 39.59 |
| 300244 | 2017 | -0.71 | 0.05 | 0.814667 | 0.66368197 | 22.72335 | 0.15749  | 38.09 |
| 2637   | 2017 | 0.66  | 0.05 | 0.814667 | 0.66368197 | 22.57475 | 0.057845 | 16.58 |
| 300435 | 2017 | -0.08 | 0.05 | 0.814667 | 0.66368197 | 20.99334 | 0.078668 | 52.6  |

|        |      |       |      |          |            |          |          |       |
|--------|------|-------|------|----------|------------|----------|----------|-------|
| 925    | 2017 | 0.18  | 0.05 | 0.814667 | 0.66368197 | 22.51762 | 0.050988 | 10.42 |
| 300360 | 2017 | -0.35 | 0.05 | 0.814667 | 0.66368197 | 21.6597  | 0.076491 | 22.81 |
| 300133 | 2017 | 0.485 | 0.05 | 0.814667 | 0.66368197 | 23.2521  | 0.090756 | 26.34 |
| 603558 | 2017 | -0.51 | 0.05 | 0.814667 | 0.66368197 | 21.91215 | 0.047402 | 40.09 |
| 300203 | 2017 | 0.295 | 0.05 | 0.814667 | 0.66368197 | 22.57612 | 0.144501 | 24.65 |
| 300068 | 2017 | 0.572 | 0.05 | 0.814667 | 0.66368197 | 23.11152 | 0.067892 | 13.61 |
| 300113 | 2017 | 1.634 | 0.05 | 0.814667 | 0.66368197 | 22.10468 | 0.192403 | 40.37 |
| 300360 | 2017 | -0.35 | 0.05 | 0.814667 | 0.66368197 | 21.6597  | 0.076491 | 22.81 |
| 2767   | 2017 | 0.069 | 0.05 | 0.814667 | 0.66368197 | 20.5194  | 0.066038 | 49.06 |
| 906    | 2017 | -0.96 | 0.05 | 0.814667 | 0.66368197 | 23.09895 | 0.06588  | 38.81 |
| 2625   | 2017 | -0.13 | 0.05 | 0.814667 | 6.64E-01   | 22.83889 | 0.010605 | 42.6  |
| 300020 | 2017 | 1.226 | 0.05 | 0.814667 | 6.64E-01   | 22.52545 | 0.040373 | 24.34 |
| 603556 | 2017 | 0.758 | 0.05 | 0.814667 | 6.64E-01   | 22.58791 | 0.120085 | 48.5  |
| 300203 | 2017 | 1.11  | 0.05 | 0.814667 | 6.64E-01   | 22.57612 | 0.144501 | 24.65 |
| 300203 | 2017 | 1.11  | 0.05 | 0.814667 | 6.64E-01   | 22.57612 | 0.144501 | 24.65 |
| 300244 | 2017 | 0.615 | 0.05 | 0.814667 | 0.66368197 | 22.72335 | 0.15749  | 38.09 |
| 603558 | 2017 | -0.51 | 0.05 | 0.814667 | 0.66368197 | 21.90198 | 0.047402 | 40.09 |
| 559    | 2017 | -0.3  | 0.05 | 0.814667 | 0.66368197 | 23.16816 | 0.17127  | 56.5  |
| 603806 | 2017 | 0.724 | 0.05 | 0.814667 | 0.66368197 | 22.46432 | 0.116369 | 56.29 |
| 2115   | 2017 | 1.183 | 0.05 | 0.814667 | 0.66368197 | 22.19015 | 0.024125 | 15.6  |
| 603558 | 2017 | -0.51 | 0.05 | 0.814667 | 0.66368197 | 21.91215 | 0.047402 | 40.09 |
| 601177 | 2017 | 0.316 | 0.05 | 0.814667 | 0.66368197 | 22.05614 | 0.016046 | 45.01 |
| 300025 | 2017 | 0.089 | 0.05 | 0.814667 | 0.66368197 | 21.82484 | -0.18791 | 11.71 |
| 2122   | 2017 | -0.4  | 0.05 | 0.814667 | 0.66368197 | 22.45752 | 0.01112  | 29.97 |
| 2805   | 2017 | -0.1  | 0.01 | 0.168297 | 0.02832388 | 20.40393 | 0.066428 | 43.54 |
| 2805   | 2017 | -0.1  | 0.01 | 0.168297 | 0.02832388 | 20.43753 | 0.066428 | 43.54 |
| 2805   | 2017 | -0.1  | 0.01 | 0.168297 | 0.02832388 | 20.43753 | 0.066428 | 43.54 |
| 528    | 2017 | -0.12 | 0.05 | 0.902868 | 0.81517035 | 23.79864 | 0.035346 | 34.98 |
| 601003 | 2017 | -0.05 | 0.05 | 0.902868 | 0.81517035 | 23.86197 | 0.302158 | 74.18 |
| 601003 | 2017 | -0.05 | 0.05 | 0.902868 | 0.81517035 | 23.86197 | 0.302158 | 74.18 |
| 600249 | 2017 | 0.044 | 0.05 | 0.902868 | 0.81517035 | 21.71861 | -0.09365 | 33.34 |
| 601003 | 2017 | -0.05 | 0.05 | 0.902868 | 0.81517035 | 23.86197 | 0.302158 | 74.18 |
| 528    | 2017 | -0.16 | 0.05 | 0.902868 | 0.81517035 | 23.79864 | 0.035346 | 34.98 |
| 600249 | 2017 | 0.044 | 0.05 | 0.902868 | 0.81517035 | 21.71861 | -0.09365 | 33.34 |
| 600249 | 2017 | 0.044 | 0.05 | 0.902868 | 0.81517035 | 21.71861 | -0.09365 | 33.34 |
| 528    | 2017 | 0.001 | 0.05 | 0.902868 | 0.81517035 | 23.79864 | 0.035346 | 34.98 |
| 528    | 2017 | 0.001 | 0.05 | 0.902868 | 0.81517035 | 23.79864 | 0.035346 | 34.98 |
| 600249 | 2017 | 0.044 | 0.05 | 0.902868 | 0.81517035 | 21.71861 | -0.09365 | 33.34 |
| 528    | 2017 | -0.17 | 0.05 | 0.902868 | 0.81517035 | 23.79864 | 0.035346 | 34.98 |
| 600249 | 2017 | 0.044 | 0.05 | 0.902868 | 0.81517035 | 21.71861 | -0.09365 | 33.34 |
| 600249 | 2017 | 0.044 | 0.05 | 0.902868 | 0.81517035 | 21.71861 | -0.09365 | 33.34 |
| 528    | 2017 | 0.184 | 0.05 | 0.902868 | 0.81517035 | 23.79864 | 0.035346 | 34.98 |
| 528    | 2017 | 0.076 | 0.05 | 0.902868 | 0.81517035 | 23.79864 | 0.035346 | 34.98 |
| 528    | 2017 | 0.235 | 0.05 | 0.902868 | 0.81517035 | 23.79864 | 0.035346 | 34.98 |
| 528    | 2017 | -0.02 | 0.05 | 0.902868 | 0.81517035 | 23.49704 | 0.035346 | 34.98 |
| 600249 | 2017 | -0.24 | 0.05 | 0.902868 | 0.81517035 | 21.71861 | -0.09365 | 33.34 |
| 528    | 2017 | -0.4  | 0.05 | 0.902868 | 0.81517035 | 23.79864 | 0.035346 | 34.98 |
| 528    | 2017 | 0.184 | 0.05 | 0.902868 | 0.81517035 | 23.79864 | 0.035346 | 34.98 |
| 600249 | 2017 | -0.24 | 0.05 | 0.902868 | 0.81517035 | 21.71861 | -0.09365 | 33.34 |
| 528    | 2017 | 0.001 | 0.05 | 0.902868 | 0.81517035 | 23.79864 | 0.035346 | 34.98 |
| 600249 | 2017 | -0.16 | 0.05 | 0.902868 | 0.81517035 | 21.72756 | -0.09365 | 33.34 |
| 528    | 2017 | 0.03  | 0.05 | 0.902868 | 0.81517035 | 23.79864 | 0.035346 | 34.98 |
| 528    | 2017 | -0.22 | 0.05 | 0.902868 | 0.81517035 | 23.79864 | 0.035346 | 34.98 |
| 600479 | 2017 | 0.558 | 0.04 | 0.842481 | 0.7097735  | 21.91321 | 0.110057 | 28.53 |

|        |      |       |      |          |           |          |          |        |
|--------|------|-------|------|----------|-----------|----------|----------|--------|
| 600458 | 2017 | 0.473 | 0.04 | 0.842481 | 0.7097735 | 23.38533 | 0.013315 | 36.43  |
| 601636 | 2017 | 0.697 | 0.04 | 0.842481 | 0.7097735 | 23.26614 | 0.161324 | 32.608 |
| 2567   | 2017 | 0.183 | 0.04 | 0.842481 | 0.7097735 | 22.52015 | 0.098357 | 27.78  |
| 601636 | 2017 | 0.46  | 0.04 | 0.842481 | 0.7097735 | 23.26614 | 0.161324 | 32.608 |
| 600458 | 2017 | -0.23 | 0.04 | 0.842481 | 0.7097735 | 23.38533 | 0.013315 | 36.43  |
| 601636 | 2017 | 0.697 | 0.04 | 0.842481 | 0.7097735 | 23.26614 | 0.161324 | 32.608 |
| 2523   | 2017 | -0.32 | 0.04 | 0.842481 | 0.7097735 | 21.93564 | 0.057122 | 29.05  |
| 601636 | 2017 | 0.476 | 0.04 | 0.842481 | 0.7097735 | 23.26614 | 0.161324 | 32.608 |
| 2567   | 2017 | -0.88 | 0.04 | 0.842481 | 0.7097735 | 22.52015 | 0.098357 | 27.78  |
| 601636 | 2017 | 0.46  | 0.04 | 0.842481 | 0.7097735 | 23.26614 | 0.161324 | 32.608 |
| 600458 | 2017 | -0.23 | 0.04 | 0.842481 | 0.7097735 | 23.38533 | 0.013315 | 36.43  |
| 2523   | 2017 | 0.775 | 0.04 | 0.842481 | 0.7097735 | 21.93564 | 0.057122 | 29.05  |
| 601636 | 2017 | 0.46  | 0.04 | 0.842481 | 0.7097735 | 23.26614 | 0.161324 | 32.608 |
| 600479 | 2017 | -0.05 | 0.04 | 0.842481 | 0.7097735 | 21.91321 | 0.110057 | 28.53  |
| 601636 | 2017 | 0.546 | 0.04 | 0.842481 | 0.7097735 | 23.26614 | 0.161324 | 32.608 |
| 600458 | 2017 | 0.42  | 0.04 | 0.842481 | 0.7097735 | 23.38533 | 0.013315 | 36.43  |
| 600479 | 2017 | -0.03 | 0.04 | 0.842481 | 0.7097735 | 21.91321 | 0.110057 | 28.53  |
| 2567   | 2017 | -0.88 | 0.04 | 0.842481 | 0.7097735 | 22.52015 | 0.098357 | 27.78  |
| 601636 | 2017 | 0.546 | 0.04 | 0.842481 | 0.7097735 | 23.26614 | 0.161324 | 32.608 |
| 2523   | 2017 | -0.32 | 0.04 | 0.842481 | 0.7097735 | 21.93564 | 0.057122 | 29.05  |
| 2523   | 2017 | -0.32 | 0.04 | 0.842481 | 0.7097735 | 21.93564 | 0.057122 | 29.05  |
| 600479 | 2017 | -0.03 | 0.04 | 0.842481 | 0.7097735 | 21.91321 | 0.110057 | 28.53  |
| 600458 | 2017 | -0.05 | 0.04 | 0.842481 | 0.7097735 | 23.38533 | 0.013315 | 36.43  |
| 600479 | 2017 | -0.03 | 0.04 | 0.842481 | 0.7097735 | 21.91321 | 0.110057 | 28.53  |
| 600479 | 2017 | -0.05 | 0.04 | 0.842481 | 0.7097735 | 21.91321 | 0.110057 | 28.53  |
| 2567   | 2017 | 0.448 | 0.04 | 0.842481 | 0.7097735 | 22.52015 | 0.098357 | 27.78  |
| 2523   | 2017 | 0.181 | 0.04 | 0.842481 | 0.7097735 | 21.61982 | 0.057122 | 29.05  |
| 2567   | 2017 | 0.183 | 0.04 | 0.842481 | 0.7097735 | 22.52015 | 0.098357 | 27.78  |
| 600458 | 2017 | -0.38 | 0.04 | 0.842481 | 0.7097735 | 23.38533 | 0.013315 | 36.43  |
| 600479 | 2017 | -0.03 | 0.04 | 0.842481 | 0.7097735 | 21.91321 | 0.110057 | 28.53  |
| 600479 | 2017 | -0.41 | 0.04 | 0.842481 | 0.7097735 | 21.29267 | 0.110057 | 28.53  |
| 2567   | 2017 | 0.183 | 0.04 | 0.842481 | 0.7097735 | 22.52015 | 0.098357 | 27.78  |
| 600458 | 2017 | -0.23 | 0.04 | 0.842481 | 0.7097735 | 23.38533 | 0.013315 | 36.43  |
| 2567   | 2017 | -0.19 | 0.04 | 0.842481 | 0.7097735 | 22.52015 | 0.098357 | 27.78  |
| 2567   | 2017 | 0.448 | 0.04 | 0.842481 | 0.7097735 | 22.52015 | 0.098357 | 27.78  |
| 2567   | 2017 | 0.006 | 0.04 | 0.842481 | 0.7097735 | 22.25906 | 0.098357 | 27.78  |
| 600458 | 2017 | -0.23 | 0.04 | 0.842481 | 0.7097735 | 23.38533 | 0.013315 | 36.43  |
| 2523   | 2017 | 0.364 | 0.04 | 0.842481 | 0.7097735 | 21.93564 | 0.057122 | 29.05  |
| 2523   | 2017 | 0.046 | 0.04 | 0.842481 | 0.7097735 | 21.93564 | 0.057122 | 29.05  |
| 600458 | 2017 | -0.23 | 0.04 | 0.842481 | 0.7097735 | 23.12822 | 0.013315 | 36.43  |
| 2523   | 2017 | 0.775 | 0.04 | 0.842481 | 0.7097735 | 21.93564 | 0.057122 | 29.05  |
| 600479 | 2017 | 0.558 | 0.04 | 0.842481 | 0.7097735 | 21.91321 | 0.110057 | 28.53  |
| 2567   | 2017 | -0.12 | 0.04 | 0.842481 | 0.7097735 | 22.52015 | 0.098357 | 27.78  |
| 600479 | 2017 | 0.028 | 0.04 | 0.842481 | 0.7097735 | 21.91321 | 0.110057 | 28.53  |
| 601636 | 2017 | 0.46  | 0.04 | 0.842481 | 0.7097735 | 22.74945 | 0.161324 | 32.608 |
| 600458 | 2017 | 0.473 | 0.04 | 0.842481 | 0.7097735 | 23.38533 | 0.013315 | 36.43  |
| 603166 | 2017 | 0.076 | 0.05 | 1.026912 | 1.0545472 | 21.87406 | 0.064534 | 69.66  |
| 2175   | 2017 | -0.67 | 0.05 | 1.026912 | 1.0545472 | 21.47587 | -0.24578 | 12.23  |
| 2175   | 2017 | 0.657 | 0.05 | 1.026912 | 1.0545472 | 21.47587 | -0.24578 | 12.23  |
| 2275   | 2017 | -0.4  | 0.05 | 1.026912 | 1.0545472 | 21.89561 | 0.174988 | 61.01  |
| 2275   | 2017 | -0.3  | 0.05 | 1.026912 | 1.0545472 | 21.89561 | 0.174988 | 61.01  |
| 2175   | 2017 | -0.59 | 0.05 | 1.026912 | 1.0545472 | 21.47587 | -0.24578 | 12.23  |
| 2175   | 2017 | -0.59 | 0.05 | 1.026912 | 1.0545472 | 21.47587 | -0.24578 | 12.23  |
| 2275   | 2017 | -0.37 | 0.05 | 1.026912 | 1.0545472 | 21.86116 | 0.174988 | 61.01  |

|        |      |       |      |          |            |          |          |       |
|--------|------|-------|------|----------|------------|----------|----------|-------|
| 603166 | 2017 | 0.771 | 0.05 | 1.026912 | 1.0545472  | 21.87406 | 0.064534 | 69.66 |
| 2166   | 2017 | 0.527 | 0.05 | 1.026912 | 1.0545472  | 21.78692 | 0.195894 | 17.57 |
| 2275   | 2017 | -0.3  | 0.05 | 1.026912 | 1.0545472  | 21.89561 | 0.174988 | 61.01 |
| 2166   | 2017 | 0.527 | 0.05 | 1.026912 | 1.0545472  | 21.09466 | 0.195894 | 17.57 |
| 603166 | 2017 | 0.771 | 0.05 | 1.026912 | 1.0545472  | 21.87406 | 0.064534 | 69.66 |
| 2275   | 2017 | -0.3  | 0.05 | 1.026912 | 1.0545472  | 21.89561 | 0.174988 | 61.01 |
| 2275   | 2017 | -0.4  | 0.05 | 1.026912 | 1.0545472  | 21.89561 | 0.174988 | 61.01 |
| 2275   | 2017 | -0.36 | 0.05 | 1.026912 | 1.0545472  | 21.89561 | 0.174988 | 61.01 |
| 2275   | 2017 | -0.16 | 0.05 | 1.026912 | 1.0545472  | 21.89561 | 0.174988 | 61.01 |
| 2175   | 2017 | -0.59 | 0.05 | 1.026912 | 1.0545472  | 21.47587 | -0.24578 | 12.23 |
| 2175   | 2017 | -0.67 | 0.05 | 1.026912 | 1.0545472  | 21.22542 | -0.24578 | 12.23 |
| 603166 | 2017 | 0.07  | 0.05 | 1.026912 | 1.0545472  | 21.87406 | 0.064534 | 69.66 |
| 603166 | 2017 | 0.035 | 0.05 | 1.026912 | 1.0545472  | 21.53493 | 0.064534 | 69.66 |
| 603166 | 2017 | 0.153 | 0.05 | 1.026912 | 1.0545472  | 21.87406 | 0.064534 | 69.66 |
| 603166 | 2017 | 0.329 | 0.05 | 1.026912 | 1.0545472  | 21.87406 | 0.064534 | 69.66 |
| 2275   | 2017 | -0.3  | 0.05 | 1.026912 | 1.0545472  | 21.89561 | 0.174988 | 61.01 |
| 2166   | 2017 | 0.527 | 0.05 | 1.026912 | 1.0545472  | 21.78692 | 0.195894 | 17.57 |
| 603166 | 2017 | -0.29 | 0.05 | 1.026912 | 1.0545472  | 21.87406 | 0.064534 | 69.66 |
| 603936 | 2017 | -0.12 | 0.02 | 0.693147 | 0.48045301 | 21.58428 | 0.065876 | 30.38 |
| 603936 | 2017 | 0.301 | 0.02 | 0.693147 | 0.48045301 | 21.58428 | 0.065876 | 30.38 |
| 603936 | 2017 | -0.56 | 0.02 | 0.693147 | 0.48045301 | 21.58428 | 0.065876 | 30.38 |
| 603936 | 2017 | 0.172 | 0.02 | 0.693147 | 0.48045301 | 21.58428 | 0.065876 | 30.38 |
| 2288   | 2017 | 0.065 | 0.02 | 0.693147 | 0.48045301 | 21.72297 | 0.031049 | 18.43 |
| 2288   | 2017 | 0.065 | 0.02 | 0.693147 | 0.48045301 | 21.72297 | 0.031049 | 18.43 |
| 603936 | 2017 | -0.12 | 0.02 | 0.693147 | 0.48045301 | 21.58428 | 0.065876 | 30.38 |
| 2288   | 2017 | 0.153 | 0.02 | 0.693147 | 0.48045301 | 21.72297 | 0.031049 | 18.43 |
| 603936 | 2017 | 0.036 | 0.02 | 0.693147 | 0.48045301 | 21.34038 | 0.065876 | 30.38 |
| 2288   | 2017 | 0.065 | 0.02 | 0.693147 | 0.48045301 | 21.72297 | 0.031049 | 18.43 |
| 2288   | 2017 | 0.595 | 0.02 | 0.693147 | 0.48045301 | 21.53134 | 0.031049 | 18.43 |
| 2288   | 2017 | 0.065 | 0.02 | 0.693147 | 0.48045301 | 21.72297 | 0.031049 | 18.43 |
| 2288   | 2017 | 0.595 | 0.02 | 0.693147 | 0.48045301 | 21.72297 | 0.031049 | 18.43 |
| 2288   | 2017 | 0.065 | 0.02 | 0.693147 | 0.48045301 | 21.72297 | 0.031049 | 18.43 |
| 600252 | 2017 | -0.51 | 0.05 | 1.016995 | 1.0342782  | 22.6495  | 0.108083 | 20.53 |
| 600252 | 2017 | -0.84 | 0.05 | 1.016995 | 1.0342782  | 22.6495  | 0.108083 | 20.53 |
| 600252 | 2017 | -0.51 | 0.05 | 1.016995 | 1.0342782  | 22.6495  | 0.108083 | 20.53 |
| 600252 | 2017 | 0.48  | 0.05 | 1.016995 | 1.0342782  | 22.23955 | 0.108083 | 20.53 |
| 600498 | 2017 | 1.523 | 0.03 | 0.849922 | 0.72236714 | 24.09487 | 0.087505 | 44.36 |
| 2281   | 2017 | 0.869 | 0.03 | 0.849922 | 0.72236714 | 22.36473 | 0.103244 | 45.44 |
| 300323 | 2017 | 0.69  | 0.03 | 0.849922 | 0.72236714 | 23.01604 | 0.127926 | 13.46 |
| 852    | 2017 | 0.39  | 0.03 | 0.849922 | 0.72236714 | 22.66875 | 0.018269 | 58.74 |
| 2194   | 2017 | 0.358 | 0.03 | 0.849922 | 0.72236714 | 21.42714 | -0.34685 | 28.99 |
| 600498 | 2017 | 0.861 | 0.03 | 0.849922 | 0.72236714 | 24.09487 | 0.087505 | 44.36 |
| 988    | 2017 | -0.13 | 0.03 | 0.849922 | 0.72236714 | 22.87248 | 0.060274 | 28.68 |
| 988    | 2017 | -0.18 | 0.03 | 0.849922 | 0.72236714 | 22.87248 | 0.060274 | 28.68 |
| 600879 | 2017 | 0.15  | 0.03 | 0.849922 | 0.72236714 | 23.83056 | 0.046184 | 21.57 |
| 600885 | 2017 | -0.61 | 0.03 | 0.849922 | 0.72236714 | 22.7572  | 0.181554 | 34.32 |
| 300567 | 2017 | 1.186 | 0.03 | 0.849922 | 0.72236714 | 20.96541 | 0.195597 | 29.18 |
| 988    | 2017 | 0.265 | 0.03 | 0.849922 | 0.72236714 | 22.87248 | 0.060274 | 28.68 |
| 300220 | 2017 | -0.11 | 0.03 | 0.849922 | 0.72236714 | 20.10336 | -0.17087 | 50.42 |
| 2281   | 2017 | 0.837 | 0.03 | 0.849922 | 0.72236714 | 22.36473 | 0.103244 | 45.44 |
| 300205 | 2017 | 0.716 | 0.03 | 0.849922 | 0.72236714 | 21.33043 | 0.009474 | 26.14 |
| 852    | 2017 | -0.16 | 0.03 | 0.849922 | 0.72236714 | 22.66875 | 0.018269 | 58.74 |
| 600879 | 2017 | 0.128 | 0.03 | 0.849922 | 0.72236714 | 23.83056 | 0.046184 | 21.57 |
| 600079 | 2017 | -0.43 | 0.03 | 0.849922 | 0.72236714 | 23.67048 | 0.139598 | 29.26 |

|        |      |       |      |          |            |          |          |       |
|--------|------|-------|------|----------|------------|----------|----------|-------|
| 600355 | 2017 | 1.063 | 0.03 | 0.849922 | 0.72236714 | 20.10336 | -0.17016 | 12.19 |
| 600079 | 2017 | 0.671 | 0.03 | 0.849922 | 0.72236714 | 24.29015 | 0.139598 | 29.26 |
| 600068 | 2017 | -0.45 | 0.03 | 0.849922 | 0.72236714 | 25.74206 | 0.114443 | 42.34 |
| 665    | 2017 | -0.66 | 0.03 | 0.849922 | 0.72236714 | 22.97026 | 0.054144 | 13.16 |
| 300323 | 2017 | -0.19 | 0.03 | 0.849922 | 0.72236714 | 23.01604 | 0.127926 | 13.46 |
| 600079 | 2017 | -0.43 | 0.03 | 0.849922 | 0.72236714 | 24.29015 | 0.139598 | 29.26 |
| 600035 | 2017 | -0.23 | 0.03 | 0.849922 | 0.72236714 | 23.0874  | 0.094896 | 35.02 |
| 600133 | 2017 | -0.47 | 0.03 | 0.849922 | 0.72236714 | 23.85112 | 0.227647 | 23.24 |
| 300536 | 2017 | -0.25 | 0.03 | 0.849922 | 0.72236714 | 20.70704 | 0.097941 | 32.22 |
| 2377   | 2017 | 0.19  | 0.03 | 0.849922 | 0.72236714 | 22.61187 | 0.009597 | 36.15 |
| 600879 | 2017 | -0.59 | 0.03 | 0.849922 | 0.72236714 | 23.83056 | 0.046184 | 21.57 |
| 600079 | 2017 | -0.43 | 0.03 | 0.849922 | 0.72236714 | 24.29015 | 0.139598 | 29.26 |
| 600079 | 2017 | 0.277 | 0.03 | 0.849922 | 0.72236714 | 24.29015 | 0.139598 | 29.26 |
| 852    | 2017 | 0.39  | 0.03 | 0.849922 | 0.72236714 | 22.66875 | 0.018269 | 58.74 |
| 600345 | 2017 | 0.72  | 0.03 | 0.849922 | 0.72236714 | 21.26381 | 0.164181 | 28.63 |
| 600079 | 2017 | 0.009 | 0.03 | 0.849922 | 0.72236714 | 24.29015 | 0.139598 | 29.26 |
| 600068 | 2017 | -0.53 | 0.03 | 0.849922 | 0.72236714 | 25.74206 | 0.114443 | 42.34 |
| 600998 | 2017 | -0.94 | 0.03 | 0.849922 | 0.72236714 | 24.67544 | 0.075389 | 23.05 |
| 988    | 2017 | -0.13 | 0.03 | 0.849922 | 0.72236714 | 22.87248 | 0.060274 | 28.68 |
| 2194   | 2017 | 0.138 | 0.03 | 0.849922 | 0.72236714 | 21.42714 | -0.34685 | 28.99 |
| 300516 | 2017 | 0.88  | 0.03 | 0.849922 | 0.72236714 | 20.97163 | 0.038144 | 58.25 |
| 300054 | 2017 | 0.551 | 0.03 | 0.849922 | 0.72236714 | 22.08748 | 0.094163 | 15.47 |
| 600998 | 2017 | 0.389 | 0.03 | 0.849922 | 0.72236714 | 24.67544 | 0.075389 | 23.05 |
| 600068 | 2017 | -0.77 | 0.03 | 0.849922 | 0.72236714 | 25.74206 | 0.114443 | 42.34 |
| 600976 | 2017 | 0.276 | 0.03 | 0.849922 | 0.72236714 | 21.02274 | 0.08257  | 22.07 |
| 600885 | 2017 | 0.054 | 0.03 | 0.849922 | 0.72236714 | 22.7572  | 0.181554 | 34.32 |
| 300220 | 2017 | 0.489 | 0.03 | 0.849922 | 0.72236714 | 20.10336 | -0.17087 | 50.42 |
| 300323 | 2017 | 0.633 | 0.03 | 0.849922 | 0.72236714 | 23.01604 | 0.127926 | 13.46 |
| 300323 | 2017 | -0.63 | 0.03 | 0.849922 | 0.72236714 | 22.31605 | 0.127926 | 13.46 |
| 600885 | 2017 | -0.21 | 0.03 | 0.849922 | 0.72236714 | 22.7572  | 0.181554 | 34.32 |
| 300205 | 2017 | 1.378 | 0.03 | 0.849922 | 0.72236714 | 21.33043 | 0.009474 | 26.14 |
| 600993 | 2017 | -0.65 | 0.03 | 0.849922 | 0.72236714 | 21.7363  | 0.135997 | 29.27 |
| 300516 | 2017 | 1.418 | 0.03 | 0.849922 | 0.72236714 | 20.97163 | 0.038144 | 58.25 |
| 600355 | 2017 | 1.725 | 0.03 | 0.849922 | 0.72236714 | 20.10336 | -0.17016 | 12.19 |
| 300018 | 2017 | 1.492 | 0.03 | 0.849922 | 0.72236714 | 21.27766 | 0.067732 | 7.84  |
| 600993 | 2017 | -0.65 | 0.03 | 0.849922 | 0.72236714 | 21.7363  | 0.135997 | 29.27 |
| 300220 | 2017 | 0.076 | 0.03 | 0.849922 | 0.72236714 | 20.10336 | -0.17087 | 50.42 |
| 600879 | 2017 | 0.128 | 0.03 | 0.849922 | 0.72236714 | 23.83056 | 0.046184 | 21.57 |
| 300567 | 2017 | 1.393 | 0.03 | 0.849922 | 0.72236714 | 20.96541 | 0.195597 | 29.18 |
| 600498 | 2017 | 1.523 | 0.03 | 0.849922 | 0.72236714 | 24.09487 | 0.087505 | 44.36 |
| 988    | 2017 | -0.04 | 0.03 | 0.849922 | 0.72236714 | 22.87248 | 0.060274 | 28.68 |
| 600498 | 2017 | 1.413 | 0.03 | 0.849922 | 0.72236714 | 24.09487 | 0.087505 | 44.36 |
| 300323 | 2017 | 0.579 | 0.03 | 0.849922 | 0.72236714 | 23.01604 | 0.127926 | 13.46 |
| 600498 | 2017 | 1.523 | 0.03 | 0.849922 | 0.72236714 | 24.09487 | 0.087505 | 44.36 |
| 600068 | 2017 | -0.66 | 0.03 | 0.849922 | 0.72236714 | 25.74206 | 0.114443 | 42.34 |
| 600885 | 2017 | -0.19 | 0.03 | 0.849922 | 0.72236714 | 22.7572  | 0.181554 | 34.32 |
| 2194   | 2017 | 0.216 | 0.03 | 0.849922 | 0.72236714 | 21.42714 | -0.34685 | 28.99 |
| 600885 | 2017 | -0.3  | 0.03 | 0.849922 | 0.72236714 | 22.7572  | 0.181554 | 34.32 |
| 2414   | 2017 | 1.335 | 0.03 | 0.849922 | 0.72236714 | 22.09821 | 0.017712 | 38.32 |
| 600498 | 2017 | 1.242 | 0.03 | 0.849922 | 0.72236714 | 24.09487 | 0.087505 | 44.36 |
| 988    | 2017 | 0.265 | 0.03 | 0.849922 | 0.72236714 | 22.87248 | 0.060274 | 28.68 |
| 600976 | 2017 | 0.25  | 0.03 | 0.849922 | 0.72236714 | 21.37775 | 0.08257  | 22.07 |
| 600998 | 2017 | -0.13 | 0.03 | 0.849922 | 0.72236714 | 24.67544 | 0.075389 | 23.05 |
| 2414   | 2017 | 1.115 | 0.03 | 0.849922 | 0.72236714 | 22.14054 | 0.017712 | 38.32 |

|        |      |       |      |          |            |          |          |       |
|--------|------|-------|------|----------|------------|----------|----------|-------|
| 665    | 2017 | -0.33 | 0.03 | 0.849922 | 0.72236714 | 22.97026 | 0.054144 | 13.16 |
| 600885 | 2017 | -0.14 | 0.03 | 0.849922 | 0.72236714 | 22.7572  | 0.181554 | 34.32 |
| 300018 | 2017 | 1.661 | 0.03 | 0.849922 | 0.72236714 | 21.27766 | 0.067732 | 7.84  |
| 600998 | 2017 | 0.389 | 0.03 | 0.849922 | 0.72236714 | 24.67544 | 0.075389 | 23.05 |
| 939    | 2017 | 0.184 | 0.03 | 0.849922 | 0.72236714 | 24.37311 | -0.21894 | 29.08 |
| 600885 | 2017 | -0.61 | 0.03 | 0.849922 | 0.72236714 | 22.7572  | 0.181554 | 34.32 |
| 600885 | 2017 | -0.17 | 0.03 | 0.849922 | 0.72236714 | 22.7572  | 0.181554 | 34.32 |
| 600079 | 2017 | -0.65 | 0.03 | 0.849922 | 0.72236714 | 24.29015 | 0.139598 | 29.26 |
| 300054 | 2017 | 0.64  | 0.03 | 0.849922 | 0.72236714 | 22.08748 | 0.094163 | 15.47 |
| 600068 | 2017 | -0.71 | 0.03 | 0.849922 | 0.72236714 | 25.74206 | 0.114443 | 42.34 |
| 988    | 2017 | 0.112 | 0.03 | 0.849922 | 0.72236714 | 22.87248 | 0.060274 | 28.68 |
| 600498 | 2017 | 0.199 | 0.03 | 0.849922 | 0.72236714 | 24.09487 | 0.087505 | 44.36 |
| 600993 | 2017 | -0.65 | 0.03 | 0.849922 | 0.72236714 | 21.7363  | 0.135997 | 29.27 |
| 300184 | 2017 | -0.29 | 0.03 | 0.849922 | 0.72236714 | 22.53595 | 0.077027 | 13.58 |
| 600998 | 2017 | -0.94 | 0.03 | 0.849922 | 0.72236714 | 24.67544 | 0.075389 | 23.05 |
| 988    | 2017 | -0.4  | 0.03 | 0.849922 | 0.72236714 | 22.87248 | 0.060274 | 28.68 |
| 600079 | 2017 | -0.43 | 0.03 | 0.849922 | 0.72236714 | 24.29015 | 0.139598 | 29.26 |
| 2377   | 2017 | 0.289 | 0.03 | 0.849922 | 0.72236714 | 22.61187 | 0.009597 | 36.15 |
| 939    | 2017 | -0.11 | 0.03 | 0.849922 | 0.72236714 | 24.37311 | -0.21894 | 29.08 |
| 300536 | 2017 | -0.25 | 0.03 | 0.849922 | 0.72236714 | 20.70704 | 0.097941 | 32.22 |
| 600976 | 2017 | 0.397 | 0.03 | 0.849922 | 0.72236714 | 21.37775 | 0.08257  | 22.07 |
| 600498 | 2017 | 0.29  | 0.03 | 0.849922 | 0.72236714 | 24.09487 | 0.087505 | 44.36 |
| 988    | 2017 | 0.045 | 0.03 | 0.849922 | 0.72236714 | 22.87248 | 0.060274 | 28.68 |
| 600355 | 2017 | 1.157 | 0.03 | 0.849922 | 0.72236714 | 20.10336 | -0.17016 | 12.19 |
| 600498 | 2017 | 1.523 | 0.03 | 0.849922 | 0.72236714 | 24.09487 | 0.087505 | 44.36 |
| 600879 | 2017 | 0.254 | 0.03 | 0.849922 | 0.72236714 | 23.83056 | 0.046184 | 21.57 |
| 600885 | 2017 | -0.61 | 0.03 | 0.849922 | 0.72236714 | 22.7572  | 0.181554 | 34.32 |
| 988    | 2017 | -0.13 | 0.03 | 0.849922 | 0.72236714 | 22.87248 | 0.060274 | 28.68 |
| 300018 | 2017 | 1.882 | 0.03 | 0.849922 | 0.72236714 | 21.10516 | 0.067732 | 7.84  |
| 600035 | 2017 | -0.74 | 0.03 | 0.849922 | 0.72236714 | 23.0874  | 0.094896 | 35.02 |
| 600879 | 2017 | 0.15  | 0.03 | 0.849922 | 0.72236714 | 23.83056 | 0.046184 | 21.57 |
| 600976 | 2017 | 0.397 | 0.03 | 0.849922 | 0.72236714 | 21.37775 | 0.08257  | 22.07 |
| 300557 | 2017 | 1.413 | 0.03 | 0.849922 | 0.72236714 | 20.18491 | 0.07288  | 25.53 |
| 600345 | 2017 | 0.796 | 0.03 | 0.849922 | 0.72236714 | 21.26381 | 0.164181 | 28.63 |
| 300220 | 2017 | -0.11 | 0.03 | 0.849922 | 0.72236714 | 20.10336 | -0.17087 | 50.42 |
| 300536 | 2017 | -0.25 | 0.03 | 0.849922 | 0.72236714 | 20.70607 | 0.097941 | 32.22 |
| 600079 | 2017 | -0.65 | 0.03 | 0.849922 | 0.72236714 | 24.29015 | 0.139598 | 29.26 |
| 600079 | 2017 | -0.43 | 0.03 | 0.849922 | 0.72236714 | 24.29015 | 0.139598 | 29.26 |
| 600079 | 2017 | -0.43 | 0.03 | 0.849922 | 0.72236714 | 24.29015 | 0.139598 | 29.26 |
| 600998 | 2017 | -0.94 | 0.03 | 0.849922 | 0.72236714 | 24.67544 | 0.075389 | 23.05 |
| 300323 | 2017 | 0.69  | 0.03 | 0.849922 | 0.72236714 | 22.31605 | 0.127926 | 13.46 |
| 600879 | 2017 | 0.191 | 0.03 | 0.849922 | 0.72236714 | 23.83056 | 0.046184 | 21.57 |
| 600355 | 2017 | 1.725 | 0.03 | 0.849922 | 0.72236714 | 20.10336 | -0.17016 | 12.19 |
| 600998 | 2017 | 0.389 | 0.03 | 0.849922 | 0.72236714 | 24.67544 | 0.075389 | 23.05 |
| 600355 | 2017 | 1.521 | 0.03 | 0.849922 | 0.72236714 | 20.10336 | -0.17016 | 12.19 |
| 600068 | 2017 | -0.51 | 0.03 | 0.849922 | 0.72236714 | 25.74206 | 0.114443 | 42.34 |
| 300054 | 2017 | 0.113 | 0.03 | 0.849922 | 0.72236714 | 22.08748 | 0.094163 | 15.47 |
| 300184 | 2017 | -0.29 | 0.03 | 0.849922 | 0.72236714 | 22.53595 | 0.077027 | 13.58 |
| 600345 | 2017 | 0.796 | 0.03 | 0.849922 | 0.72236714 | 21.26381 | 0.164181 | 28.63 |
| 2414   | 2017 | 1.127 | 0.03 | 0.849922 | 0.72236714 | 22.14054 | 0.017712 | 38.32 |
| 600885 | 2017 | -0.14 | 0.03 | 0.849922 | 0.72236714 | 22.7572  | 0.181554 | 34.32 |
| 600079 | 2017 | -0.43 | 0.03 | 0.849922 | 0.72236714 | 24.29015 | 0.139598 | 29.26 |
| 600498 | 2017 | 1.242 | 0.03 | 0.849922 | 0.72236714 | 24.09487 | 0.087505 | 44.36 |
| 300220 | 2017 | 0.417 | 0.03 | 0.849922 | 0.72236714 | 20.10336 | -0.17087 | 50.42 |

|        |      |       |      |          |            |          |          |       |
|--------|------|-------|------|----------|------------|----------|----------|-------|
| 600079 | 2017 | -0.01 | 0.03 | 0.849922 | 0.72236714 | 24.29015 | 0.139598 | 29.26 |
| 300567 | 2017 | 1.404 | 0.03 | 0.849922 | 0.72236714 | 20.96541 | 0.195597 | 29.18 |
| 600879 | 2017 | -0.31 | 0.03 | 0.849922 | 0.72236714 | 23.83056 | 0.046184 | 21.57 |
| 600879 | 2017 | 0.38  | 0.03 | 0.849922 | 0.72236714 | 23.83056 | 0.046184 | 21.57 |
| 600998 | 2017 | -0.27 | 0.03 | 0.849922 | 0.72236714 | 24.67544 | 0.075389 | 23.05 |
| 300220 | 2017 | 0.152 | 0.03 | 0.849922 | 0.72236714 | 20.10336 | -0.17087 | 50.42 |
| 600079 | 2017 | -0.43 | 0.03 | 0.849922 | 0.72236714 | 24.29015 | 0.139598 | 29.26 |
| 600885 | 2017 | -0.61 | 0.03 | 0.849922 | 0.72236714 | 22.04958 | 0.181554 | 34.32 |
| 600885 | 2017 | -0.2  | 0.03 | 0.849922 | 0.72236714 | 22.7572  | 0.181554 | 34.32 |
| 600068 | 2017 | -0.4  | 0.03 | 0.849922 | 0.72236714 | 25.74206 | 0.114443 | 42.34 |
| 600879 | 2017 | -0.76 | 0.03 | 0.849922 | 0.72236714 | 23.83056 | 0.046184 | 21.57 |
| 600498 | 2017 | 0.199 | 0.03 | 0.849922 | 0.72236714 | 24.09487 | 0.087505 | 44.36 |
| 300205 | 2017 | 0.988 | 0.03 | 0.849922 | 0.72236714 | 21.33043 | 0.009474 | 26.14 |
| 988    | 2017 | 0.101 | 0.03 | 0.849922 | 0.72236714 | 22.87248 | 0.060274 | 28.68 |
| 600885 | 2017 | -0.19 | 0.03 | 0.849922 | 0.72236714 | 22.7572  | 0.181554 | 34.32 |
| 600998 | 2017 | 0.389 | 0.03 | 0.849922 | 0.72236714 | 24.67544 | 0.075389 | 23.05 |
| 600355 | 2017 | 1.394 | 0.03 | 0.849922 | 0.72236714 | 20.10336 | -0.17016 | 12.19 |
| 600133 | 2017 | -0.26 | 0.03 | 0.849922 | 0.72236714 | 22.68329 | 0.227647 | 23.24 |
| 600998 | 2017 | -0.27 | 0.03 | 0.849922 | 0.72236714 | 24.18213 | 0.075389 | 23.05 |
| 300516 | 2017 | 1.418 | 0.03 | 0.849922 | 0.72236714 | 20.97163 | 0.038144 | 58.25 |
| 600079 | 2017 | 0.671 | 0.03 | 0.849922 | 0.72236714 | 24.29015 | 0.139598 | 29.26 |
| 600498 | 2017 | 0.956 | 0.03 | 0.849922 | 0.72236714 | 24.09487 | 0.087505 | 44.36 |
| 600079 | 2017 | 0.044 | 0.03 | 0.849922 | 0.72236714 | 24.29015 | 0.139598 | 29.26 |
| 300018 | 2017 | 1.551 | 0.03 | 0.849922 | 0.72236714 | 21.27766 | 0.067732 | 7.84  |
| 300054 | 2017 | 1.019 | 0.03 | 0.849922 | 0.72236714 | 22.08748 | 0.094163 | 15.47 |
| 300220 | 2017 | 0.489 | 0.03 | 0.849922 | 0.72236714 | 20.10336 | -0.17087 | 50.42 |
| 2414   | 2017 | 1.335 | 0.03 | 0.849922 | 0.72236714 | 22.14054 | 0.017712 | 38.32 |
| 600993 | 2017 | -0.65 | 0.03 | 0.849922 | 0.72236714 | 21.65011 | 0.135997 | 29.27 |
| 300184 | 2017 | -0.4  | 0.03 | 0.849922 | 0.72236714 | 22.53595 | 0.077027 | 13.58 |
| 300184 | 2017 | -0.11 | 0.03 | 0.849922 | 0.72236714 | 22.53595 | 0.077027 | 13.58 |
| 988    | 2017 | -0.03 | 0.03 | 0.849922 | 0.72236714 | 22.87248 | 0.060274 | 28.68 |
| 600068 | 2017 | -0.42 | 0.03 | 0.849922 | 0.72236714 | 25.74206 | 0.114443 | 42.34 |
| 600133 | 2017 | 0.371 | 0.03 | 0.849922 | 0.72236714 | 23.85112 | 0.227647 | 23.24 |
| 300567 | 2017 | 1.625 | 0.03 | 0.849922 | 0.72236714 | 20.96541 | 0.195597 | 29.18 |
| 300323 | 2017 | 0.69  | 0.03 | 0.849922 | 0.72236714 | 23.01604 | 0.127926 | 13.46 |
| 2414   | 2017 | 1.026 | 0.03 | 0.849922 | 0.72236714 | 22.14054 | 0.017712 | 38.32 |
| 600885 | 2017 | 0.005 | 0.03 | 0.849922 | 0.72236714 | 22.7572  | 0.181554 | 34.32 |
| 300567 | 2017 | 1.733 | 0.03 | 0.849922 | 0.72236714 | 20.96541 | 0.195597 | 29.18 |
| 600976 | 2017 | 0.25  | 0.03 | 0.849922 | 0.72236714 | 21.37775 | 0.08257  | 22.07 |
| 600998 | 2017 | 0.224 | 0.03 | 0.849922 | 0.72236714 | 24.67544 | 0.075389 | 23.05 |
| 600079 | 2017 | -0.43 | 0.03 | 0.849922 | 0.72236714 | 24.29015 | 0.139598 | 29.26 |
| 665    | 2017 | 0.094 | 0.03 | 0.849922 | 0.72236714 | 22.97026 | 0.054144 | 13.16 |
| 600498 | 2017 | 0.199 | 0.03 | 0.849922 | 0.72236714 | 24.09487 | 0.087505 | 44.36 |
| 988    | 2017 | -0.02 | 0.03 | 0.849922 | 0.72236714 | 22.87248 | 0.060274 | 28.68 |
| 783    | 2017 | 0.668 | 0.03 | 0.849922 | 0.72236714 | 25.452   | 0.057657 | 12.84 |
| 852    | 2017 | -0.05 | 0.03 | 0.849922 | 0.72236714 | 22.66875 | 0.018269 | 58.74 |
| 988    | 2017 | 0.265 | 0.03 | 0.849922 | 0.72236714 | 22.87248 | 0.060274 | 28.68 |
| 988    | 2017 | 0.204 | 0.03 | 0.849922 | 0.72236714 | 22.87248 | 0.060274 | 28.68 |
| 600885 | 2017 | -0.07 | 0.03 | 0.849922 | 0.72236714 | 22.7572  | 0.181554 | 34.32 |
| 988    | 2017 | 0.265 | 0.03 | 0.849922 | 0.72236714 | 22.87248 | 0.060274 | 28.68 |
| 600993 | 2017 | 0.287 | 0.03 | 0.849922 | 0.72236714 | 21.7363  | 0.135997 | 29.27 |
| 300527 | 2017 | 0.483 | 0.03 | 0.849922 | 0.72236714 | 21.8677  | 0.097575 | 47.4  |
| 600498 | 2017 | 1.523 | 0.03 | 0.849922 | 0.72236714 | 24.09487 | 0.087505 | 44.36 |
| 665    | 2017 | 0.094 | 0.03 | 0.849922 | 0.72236714 | 22.92421 | 0.054144 | 13.16 |



|        |      |       |      |          |            |          |          |       |
|--------|------|-------|------|----------|------------|----------|----------|-------|
| 600133 | 2017 | -0.42 | 0.03 | 0.849922 | 0.72236714 | 23.85112 | 0.227647 | 23.24 |
| 300220 | 2017 | 0.549 | 0.03 | 0.849922 | 0.72236714 | 20.10336 | -0.17087 | 50.42 |
| 2194   | 2017 | 0.178 | 0.03 | 0.849922 | 0.72236714 | 21.52467 | -0.34685 | 28.99 |
| 600079 | 2017 | 0.009 | 0.03 | 0.849922 | 0.72236714 | 24.29015 | 0.139598 | 29.26 |
| 300557 | 2017 | 0.236 | 0.03 | 0.849922 | 0.72236714 | 20.18491 | 0.07288  | 25.53 |
| 2281   | 2017 | 0.796 | 0.03 | 0.849922 | 0.72236714 | 22.36473 | 0.103244 | 45.44 |
| 600345 | 2017 | 0.796 | 0.03 | 0.849922 | 0.72236714 | 21.26381 | 0.164181 | 28.63 |
| 2377   | 2017 | 0.455 | 0.03 | 0.849922 | 0.72236714 | 22.42352 | 0.009597 | 36.15 |
| 600079 | 2017 | -0.43 | 0.03 | 0.849922 | 0.72236714 | 24.29015 | 0.139598 | 29.26 |
| 600079 | 2017 | 0.293 | 0.03 | 0.849922 | 0.72236714 | 24.29015 | 0.139598 | 29.26 |
| 300516 | 2017 | 1.266 | 0.03 | 0.849922 | 0.72236714 | 20.97163 | 0.038144 | 58.25 |
| 300205 | 2017 | 0.716 | 0.03 | 0.849922 | 0.72236714 | 21.33043 | 0.009474 | 26.14 |
| 600068 | 2017 | -0.31 | 0.03 | 0.849922 | 0.72236714 | 25.74206 | 0.114443 | 42.34 |
| 665    | 2017 | -0.66 | 0.03 | 0.849922 | 0.72236714 | 22.97026 | 0.054144 | 13.16 |
| 600498 | 2017 | 1.523 | 0.03 | 0.849922 | 0.72236714 | 24.09487 | 0.087505 | 44.36 |
| 988    | 2017 | 0.265 | 0.03 | 0.849922 | 0.72236714 | 22.87248 | 0.060274 | 28.68 |
| 600133 | 2017 | -0.42 | 0.03 | 0.849922 | 0.72236714 | 23.85112 | 0.227647 | 23.24 |
| 600498 | 2017 | 1.523 | 0.03 | 0.849922 | 0.72236714 | 24.09487 | 0.087505 | 44.36 |
| 600998 | 2017 | -0.45 | 0.03 | 0.849922 | 0.72236714 | 24.67544 | 0.075389 | 23.05 |
| 600345 | 2017 | 0.796 | 0.03 | 0.849922 | 0.72236714 | 21.26381 | 0.164181 | 28.63 |
| 600976 | 2017 | 0.397 | 0.03 | 0.849922 | 0.72236714 | 21.37775 | 0.08257  | 22.07 |
| 300527 | 2017 | 0.483 | 0.03 | 0.849922 | 0.72236714 | 21.8677  | 0.097575 | 47.4  |
| 300054 | 2017 | 0.357 | 0.03 | 0.849922 | 0.72236714 | 22.08748 | 0.094163 | 15.47 |
| 600998 | 2017 | -0.94 | 0.03 | 0.849922 | 0.72236714 | 24.67544 | 0.075389 | 23.05 |
| 2377   | 2017 | 0.19  | 0.03 | 0.849922 | 0.72236714 | 22.61187 | 0.009597 | 36.15 |
| 600993 | 2017 | -0.65 | 0.03 | 0.849922 | 0.72236714 | 21.7363  | 0.135997 | 29.27 |
| 600885 | 2017 | 0.054 | 0.03 | 0.849922 | 0.72236714 | 22.7572  | 0.181554 | 34.32 |
| 600879 | 2017 | 0.128 | 0.03 | 0.849922 | 0.72236714 | 23.83056 | 0.046184 | 21.57 |
| 300018 | 2017 | 1.219 | 0.03 | 0.849922 | 0.72236714 | 21.27766 | 0.067732 | 7.84  |
| 783    | 2017 | 0.668 | 0.03 | 0.849922 | 0.72236714 | 25.35928 | 0.057657 | 12.84 |
| 600998 | 2017 | 0.389 | 0.03 | 0.849922 | 0.72236714 | 24.67544 | 0.075389 | 23.05 |
| 600879 | 2017 | 0.406 | 0.03 | 0.849922 | 0.72236714 | 23.83056 | 0.046184 | 21.57 |
| 600498 | 2017 | 1.085 | 0.03 | 0.849922 | 0.72236714 | 24.09487 | 0.087505 | 44.36 |
| 300205 | 2017 | 1.378 | 0.03 | 0.849922 | 0.72236714 | 21.33043 | 0.009474 | 26.14 |
| 939    | 2017 | -0.41 | 0.03 | 0.849922 | 0.72236714 | 24.07319 | -0.21894 | 29.08 |
| 300205 | 2017 | 1.378 | 0.03 | 0.849922 | 0.72236714 | 21.33043 | 0.009474 | 26.14 |
| 988    | 2017 | 0.265 | 0.03 | 0.849922 | 0.72236714 | 22.87248 | 0.060274 | 28.68 |
| 600998 | 2017 | -0.94 | 0.03 | 0.849922 | 0.72236714 | 24.67544 | 0.075389 | 23.05 |
| 600345 | 2017 | 0.796 | 0.03 | 0.849922 | 0.72236714 | 21.26381 | 0.164181 | 28.63 |
| 600998 | 2017 | 0.389 | 0.03 | 0.849922 | 0.72236714 | 24.67544 | 0.075389 | 23.05 |
| 600079 | 2017 | -0.43 | 0.03 | 0.849922 | 0.72236714 | 24.29015 | 0.139598 | 29.26 |
| 600068 | 2017 | -0.47 | 0.03 | 0.849922 | 0.72236714 | 25.74206 | 0.114443 | 42.34 |
| 988    | 2017 | -0.07 | 0.03 | 0.849922 | 0.72236714 | 22.87248 | 0.060274 | 28.68 |
| 600998 | 2017 | 0.389 | 0.03 | 0.849922 | 0.72236714 | 24.67544 | 0.075389 | 23.05 |
| 300557 | 2017 | 1.237 | 0.03 | 0.849922 | 0.72236714 | 20.18491 | 0.07288  | 25.53 |
| 300567 | 2017 | 0.639 | 0.03 | 0.849922 | 0.72236714 | 20.96541 | 0.195597 | 29.18 |
| 600345 | 2017 | 0.79  | 0.03 | 0.849922 | 0.72236714 | 21.26381 | 0.164181 | 28.63 |
| 600345 | 2017 | 0.72  | 0.03 | 0.849922 | 0.72236714 | 21.26381 | 0.164181 | 28.63 |
| 600079 | 2017 | -0.21 | 0.03 | 0.849922 | 0.72236714 | 24.29015 | 0.139598 | 29.26 |
| 300557 | 2017 | 1.413 | 0.03 | 0.849922 | 0.72236714 | 20.18491 | 0.07288  | 25.53 |
| 300205 | 2017 | 1.378 | 0.03 | 0.849922 | 0.72236714 | 21.43729 | 0.009474 | 26.14 |
| 600885 | 2017 | -0.28 | 0.03 | 0.849922 | 0.72236714 | 22.7572  | 0.181554 | 34.32 |
| 600068 | 2017 | 0.006 | 0.03 | 0.849922 | 0.72236714 | 25.74206 | 0.114443 | 42.34 |
| 300184 | 2017 | -0.29 | 0.03 | 0.849922 | 0.72236714 | 22.53595 | 0.077027 | 13.58 |

|        |      |       |      |          |            |          |          |       |
|--------|------|-------|------|----------|------------|----------|----------|-------|
| 600068 | 2017 | -0.34 | 0.03 | 0.849922 | 0.72236714 | 25.74206 | 0.114443 | 42.34 |
| 2281   | 2017 | 0.908 | 0.03 | 0.849922 | 0.72236714 | 22.36473 | 0.103244 | 45.44 |
| 600879 | 2017 | 0.005 | 0.03 | 0.849922 | 0.72236714 | 23.83056 | 0.046184 | 21.57 |
| 600885 | 2017 | -0.61 | 0.03 | 0.849922 | 0.72236714 | 22.7572  | 0.181554 | 34.32 |
| 600079 | 2017 | -0.43 | 0.03 | 0.849922 | 0.72236714 | 24.29015 | 0.139598 | 29.26 |
| 300184 | 2017 | -0.29 | 0.03 | 0.849922 | 0.72236714 | 22.53595 | 0.077027 | 13.58 |
| 600355 | 2017 | 1.446 | 0.03 | 0.849922 | 0.72236714 | 20.10336 | -0.17016 | 12.19 |
| 300557 | 2017 | 0.236 | 0.03 | 0.849922 | 0.72236714 | 20.19625 | 0.07288  | 25.53 |
| 939    | 2017 | -0.11 | 0.03 | 0.849922 | 0.72236714 | 24.37311 | -0.21894 | 29.08 |
| 988    | 2017 | 0.192 | 0.03 | 0.849922 | 0.72236714 | 22.87248 | 0.060274 | 28.68 |
| 2377   | 2017 | 0.19  | 0.03 | 0.849922 | 0.72236714 | 22.61187 | 0.009597 | 36.15 |
| 600035 | 2017 | -0.23 | 0.03 | 0.849922 | 0.72236714 | 23.0874  | 0.094896 | 35.02 |
| 852    | 2017 | -0.08 | 0.03 | 0.849922 | 0.72236714 | 22.66875 | 0.018269 | 58.74 |
| 600068 | 2017 | -0.51 | 0.03 | 0.849922 | 0.72236714 | 25.74206 | 0.114443 | 42.34 |
| 600068 | 2017 | -0.65 | 0.03 | 0.849922 | 0.72236714 | 25.74206 | 0.114443 | 42.34 |
| 600879 | 2017 | -0.31 | 0.03 | 0.849922 | 0.72236714 | 23.83056 | 0.046184 | 21.57 |
| 600133 | 2017 | 0.371 | 0.03 | 0.849922 | 0.72236714 | 23.85112 | 0.227647 | 23.24 |
| 600885 | 2017 | -0.61 | 0.03 | 0.849922 | 0.72236714 | 22.7572  | 0.181554 | 34.32 |
| 600079 | 2017 | 0.671 | 0.03 | 0.849922 | 0.72236714 | 24.29015 | 0.139598 | 29.26 |
| 300567 | 2017 | 1.343 | 0.03 | 0.849922 | 0.72236714 | 20.96541 | 0.195597 | 29.18 |
| 852    | 2017 | -0.11 | 0.03 | 0.849922 | 0.72236714 | 22.66875 | 0.018269 | 58.74 |
| 2414   | 2017 | 1.619 | 0.03 | 0.849922 | 0.72236714 | 22.14054 | 0.017712 | 38.32 |
| 988    | 2017 | 0.265 | 0.03 | 0.849922 | 0.72236714 | 22.87248 | 0.060274 | 28.68 |
| 600133 | 2017 | -0.76 | 0.03 | 0.849922 | 0.72236714 | 23.85112 | 0.227647 | 23.24 |
| 300018 | 2017 | 1.882 | 0.03 | 0.849922 | 0.72236714 | 21.27766 | 0.067732 | 7.84  |
| 600068 | 2017 | -0.66 | 0.03 | 0.849922 | 0.72236714 | 25.74206 | 0.114443 | 42.34 |
| 2281   | 2017 | 0.869 | 0.03 | 0.849922 | 0.72236714 | 22.26584 | 0.103244 | 45.44 |
| 600879 | 2017 | 0.128 | 0.03 | 0.849922 | 0.72236714 | 23.83056 | 0.046184 | 21.57 |
| 600079 | 2017 | 0.625 | 0.03 | 0.849922 | 0.72236714 | 24.29015 | 0.139598 | 29.26 |
| 300184 | 2017 | -0.29 | 0.03 | 0.849922 | 0.72236714 | 22.19307 | 0.077027 | 13.58 |
| 600498 | 2017 | 0.199 | 0.03 | 0.849922 | 0.72236714 | 24.09487 | 0.087505 | 44.36 |
| 939    | 2017 | 0.257 | 0.03 | 0.849922 | 0.72236714 | 24.37311 | -0.21894 | 29.08 |
| 600068 | 2017 | -0.37 | 0.03 | 0.849922 | 0.72236714 | 25.74206 | 0.114443 | 42.34 |
| 600355 | 2017 | 1.521 | 0.03 | 0.849922 | 0.72236714 | 20.10336 | -0.17016 | 12.19 |
| 300054 | 2017 | 1.019 | 0.03 | 0.849922 | 0.72236714 | 22.08748 | 0.094163 | 15.47 |
| 600079 | 2017 | 0.406 | 0.03 | 0.849922 | 0.72236714 | 24.29015 | 0.139598 | 29.26 |
| 2194   | 2017 | 0.178 | 0.03 | 0.849922 | 0.72236714 | 21.42714 | -0.34685 | 28.99 |
| 600885 | 2017 | -0.08 | 0.03 | 0.849922 | 0.72236714 | 22.7572  | 0.181554 | 34.32 |
| 852    | 2017 | -0.11 | 0.03 | 0.849922 | 0.72236714 | 22.25789 | 0.018269 | 58.74 |
| 852    | 2017 | 0.39  | 0.03 | 0.849922 | 0.72236714 | 22.66875 | 0.018269 | 58.74 |
| 300557 | 2017 | 1.237 | 0.03 | 0.849922 | 0.72236714 | 20.18491 | 0.07288  | 25.53 |
| 600993 | 2017 | -0.65 | 0.03 | 0.849922 | 0.72236714 | 21.7363  | 0.135997 | 29.27 |
| 2281   | 2017 | 0.236 | 0.03 | 0.849922 | 0.72236714 | 22.36473 | 0.103244 | 45.44 |
| 783    | 2017 | 0.668 | 0.03 | 0.849922 | 0.72236714 | 25.452   | 0.057657 | 12.84 |
| 300323 | 2017 | 0.574 | 0.03 | 0.849922 | 0.72236714 | 23.01604 | 0.127926 | 13.46 |
| 600068 | 2017 | -0.4  | 0.03 | 0.849922 | 0.72236714 | 25.74206 | 0.114443 | 42.34 |
| 600998 | 2017 | 0.389 | 0.03 | 0.849922 | 0.72236714 | 24.67544 | 0.075389 | 23.05 |
| 300184 | 2017 | -0.29 | 0.03 | 0.849922 | 0.72236714 | 22.53595 | 0.077027 | 13.58 |
| 600879 | 2017 | 0.128 | 0.03 | 0.849922 | 0.72236714 | 23.83056 | 0.046184 | 21.57 |
| 300054 | 2017 | -0.04 | 0.03 | 0.849922 | 0.72236714 | 21.91154 | 0.094163 | 15.47 |
| 2281   | 2017 | 0.869 | 0.03 | 0.849922 | 0.72236714 | 22.36473 | 0.103244 | 45.44 |
| 600993 | 2017 | 0.287 | 0.03 | 0.849922 | 0.72236714 | 21.7363  | 0.135997 | 29.27 |
| 300184 | 2017 | -0.29 | 0.03 | 0.849922 | 0.72236714 | 22.53595 | 0.077027 | 13.58 |
| 600068 | 2017 | -0.29 | 0.03 | 0.849922 | 0.72236714 | 25.74206 | 0.114443 | 42.34 |

|        |      |       |      |          |            |          |          |       |
|--------|------|-------|------|----------|------------|----------|----------|-------|
| 600079 | 2017 | -0.43 | 0.03 | 0.849922 | 0.72236714 | 24.29015 | 0.139598 | 29.26 |
| 600998 | 2017 | 0.389 | 0.03 | 0.849922 | 0.72236714 | 24.67544 | 0.075389 | 23.05 |
| 2414   | 2017 | 0.914 | 0.03 | 0.849922 | 0.72236714 | 22.14054 | 0.017712 | 38.32 |
| 600079 | 2017 | -0.65 | 0.03 | 0.849922 | 0.72236714 | 24.29015 | 0.139598 | 29.26 |
| 600355 | 2017 | 1.578 | 0.03 | 0.849922 | 0.72236714 | 20.10336 | -0.17016 | 12.19 |
| 600068 | 2017 | -0.44 | 0.03 | 0.849922 | 0.72236714 | 25.74206 | 0.114443 | 42.34 |
| 600079 | 2017 | -0.65 | 0.03 | 0.849922 | 0.72236714 | 24.29015 | 0.139598 | 29.26 |
| 852    | 2017 | -0.14 | 0.03 | 0.849922 | 0.72236714 | 22.66875 | 0.018269 | 58.74 |
| 600079 | 2017 | 0.671 | 0.03 | 0.849922 | 0.72236714 | 24.29015 | 0.139598 | 29.26 |
| 300494 | 2017 | 1.822 | 0.03 | 0.849922 | 0.72236714 | 20.73525 | 0.089589 | 38.4  |
| 600068 | 2017 | -0.57 | 0.03 | 0.849922 | 0.72236714 | 25.74206 | 0.114443 | 42.34 |
| 988    | 2017 | 0.118 | 0.03 | 0.849922 | 0.72236714 | 22.87248 | 0.060274 | 28.68 |
| 600885 | 2017 | -0.08 | 0.03 | 0.849922 | 0.72236714 | 22.7572  | 0.181554 | 34.32 |
| 600079 | 2017 | 0.009 | 0.03 | 0.849922 | 0.72236714 | 24.29015 | 0.139598 | 29.26 |
| 600068 | 2017 | -0.4  | 0.03 | 0.849922 | 0.72236714 | 25.74206 | 0.114443 | 42.34 |
| 600079 | 2017 | -0.46 | 0.03 | 0.849922 | 0.72236714 | 24.29015 | 0.139598 | 29.26 |
| 300018 | 2017 | 1.882 | 0.03 | 0.849922 | 0.72236714 | 21.27766 | 0.067732 | 7.84  |
| 600998 | 2017 | 0.389 | 0.03 | 0.849922 | 0.72236714 | 24.67544 | 0.075389 | 23.05 |
| 600035 | 2017 | -0.08 | 0.03 | 0.849922 | 0.72236714 | 23.0874  | 0.094896 | 35.02 |
| 600079 | 2017 | 0.671 | 0.03 | 0.849922 | 0.72236714 | 24.29015 | 0.139598 | 29.26 |
| 600068 | 2017 | -0.57 | 0.03 | 0.849922 | 0.72236714 | 25.74206 | 0.114443 | 42.34 |
| 300220 | 2017 | 0.417 | 0.03 | 0.849922 | 0.72236714 | 20.10336 | -0.17087 | 50.42 |
| 300018 | 2017 | 1.882 | 0.03 | 0.849922 | 0.72236714 | 21.27766 | 0.067732 | 7.84  |
| 600079 | 2017 | -0.65 | 0.03 | 0.849922 | 0.72236714 | 24.29015 | 0.139598 | 29.26 |
| 600035 | 2017 | -0.23 | 0.03 | 0.849922 | 0.72236714 | 22.89891 | 0.094896 | 35.02 |
| 300018 | 2017 | 1.882 | 0.03 | 0.849922 | 0.72236714 | 21.27766 | 0.067732 | 7.84  |
| 600498 | 2017 | 0.346 | 0.03 | 0.849922 | 0.72236714 | 24.09487 | 0.087505 | 44.36 |
| 300054 | 2017 | 0.945 | 0.03 | 0.849922 | 0.72236714 | 22.08748 | 0.094163 | 15.47 |
| 600079 | 2017 | 0.34  | 0.03 | 0.849922 | 0.72236714 | 24.29015 | 0.139598 | 29.26 |
| 600079 | 2017 | 0.009 | 0.03 | 0.849922 | 0.72236714 | 24.29015 | 0.139598 | 29.26 |
| 939    | 2017 | 0.257 | 0.03 | 0.849922 | 0.72236714 | 24.37311 | -0.21894 | 29.08 |
| 300054 | 2017 | 0.945 | 0.03 | 0.849922 | 0.72236714 | 22.08748 | 0.094163 | 15.47 |
| 988    | 2017 | 0.265 | 0.03 | 0.849922 | 0.72236714 | 22.2999  | 0.060274 | 28.68 |
| 300018 | 2017 | 0.888 | 0.03 | 0.849922 | 0.72236714 | 21.27766 | 0.067732 | 7.84  |
| 2377   | 2017 | 0.455 | 0.03 | 0.849922 | 0.72236714 | 22.61187 | 0.009597 | 36.15 |
| 600345 | 2017 | 0.796 | 0.03 | 0.849922 | 0.72236714 | 21.23511 | 0.164181 | 28.63 |
| 300567 | 2017 | 1.695 | 0.03 | 0.849922 | 0.72236714 | 20.79781 | 0.195597 | 29.18 |
| 600879 | 2017 | 0.128 | 0.03 | 0.849922 | 0.72236714 | 23.83056 | 0.046184 | 21.57 |
| 300527 | 2017 | 0.483 | 0.03 | 0.849922 | 0.72236714 | 21.85755 | 0.097575 | 47.4  |
| 2414   | 2017 | 1.127 | 0.03 | 0.849922 | 0.72236714 | 22.14054 | 0.017712 | 38.32 |
| 939    | 2017 | 0.257 | 0.03 | 0.849922 | 0.72236714 | 24.37311 | -0.21894 | 29.08 |
| 300054 | 2017 | 0.167 | 0.03 | 0.849922 | 0.72236714 | 22.08748 | 0.094163 | 15.47 |
| 600498 | 2017 | 1.523 | 0.03 | 0.849922 | 0.72236714 | 23.9733  | 0.087505 | 44.36 |
| 300220 | 2017 | 0.36  | 0.03 | 0.849922 | 0.72236714 | 20.10336 | -0.17087 | 50.42 |
| 600133 | 2017 | -0.95 | 0.03 | 0.849922 | 0.72236714 | 23.85112 | 0.227647 | 23.24 |
| 300516 | 2017 | 0.88  | 0.03 | 0.849922 | 0.72236714 | 20.97072 | 0.038144 | 58.25 |
| 600133 | 2017 | 0.371 | 0.03 | 0.849922 | 0.72236714 | 23.85112 | 0.227647 | 23.24 |
| 300557 | 2017 | 0.904 | 0.03 | 0.849922 | 0.72236714 | 20.18491 | 0.07288  | 25.53 |
| 600355 | 2017 | 1.449 | 0.03 | 0.849922 | 0.72236714 | 20.10336 | -0.17016 | 12.19 |
| 852    | 2017 | 0.215 | 0.03 | 0.849922 | 0.72236714 | 22.66875 | 0.018269 | 58.74 |
| 600079 | 2017 | 0.671 | 0.03 | 0.849922 | 0.72236714 | 24.29015 | 0.139598 | 29.26 |
| 300494 | 2017 | 1.822 | 0.03 | 0.849922 | 0.72236714 | 20.73517 | 0.089589 | 38.4  |
| 600079 | 2017 | -0.43 | 0.03 | 0.849922 | 0.72236714 | 24.29015 | 0.139598 | 29.26 |
| 600079 | 2017 | 0.07  | 0.03 | 0.849922 | 0.72236714 | 24.29015 | 0.139598 | 29.26 |

|        |      |       |      |          |            |          |          |       |
|--------|------|-------|------|----------|------------|----------|----------|-------|
| 600879 | 2017 | 0.286 | 0.03 | 0.849922 | 0.72236714 | 23.83056 | 0.046184 | 21.57 |
| 600498 | 2017 | 0.563 | 0.03 | 0.849922 | 0.72236714 | 24.09487 | 0.087505 | 44.36 |
| 2194   | 2017 | 0.579 | 0.03 | 0.849922 | 0.72236714 | 21.42714 | -0.34685 | 28.99 |
| 939    | 2017 | 0.037 | 0.03 | 0.849922 | 0.72236714 | 24.37311 | -0.21894 | 29.08 |
| 600498 | 2017 | 1.308 | 0.03 | 0.849922 | 0.72236714 | 24.09487 | 0.087505 | 44.36 |
| 2281   | 2017 | 0.869 | 0.03 | 0.849922 | 0.72236714 | 22.36473 | 0.103244 | 45.44 |
| 600068 | 2017 | -0.51 | 0.03 | 0.849922 | 0.72236714 | 25.25629 | 0.114443 | 42.34 |
| 600345 | 2017 | 0.796 | 0.03 | 0.849922 | 0.72236714 | 21.26381 | 0.164181 | 28.63 |
| 2194   | 2017 | 0.216 | 0.03 | 0.849922 | 0.72236714 | 21.42714 | -0.34685 | 28.99 |
| 600993 | 2017 | -0.33 | 0.03 | 0.849922 | 0.72236714 | 21.7363  | 0.135997 | 29.27 |
| 600976 | 2017 | 0.397 | 0.03 | 0.849922 | 0.72236714 | 21.37775 | 0.08257  | 22.07 |
| 600879 | 2017 | 0.06  | 0.03 | 0.849922 | 0.72236714 | 23.04924 | 0.046184 | 21.57 |
| 300494 | 2017 | 1.822 | 0.03 | 0.849922 | 0.72236714 | 20.73517 | 0.089589 | 38.4  |
| 2096   | 2017 | -0.76 | 0.04 | 1.133281 | 1.2843258  | 22.08316 | 0.012447 | 41.62 |
| 2096   | 2017 | -0.76 | 0.04 | 1.133281 | 1.2843258  | 22.08316 | 0.012447 | 41.62 |
| 2096   | 2017 | -0.76 | 0.04 | 1.133281 | 1.2843258  | 22.08316 | 0.012447 | 41.62 |
| 2096   | 2017 | -0.76 | 0.04 | 1.133281 | 1.2843258  | 22.08316 | 0.012447 | 41.62 |
| 2096   | 2017 | -0.59 | 0.04 | 1.133281 | 1.2843258  | 22.08316 | 0.012447 | 41.62 |
| 2096   | 2017 | -0.76 | 0.04 | 1.133281 | 1.2843258  | 22.08316 | 0.012447 | 41.62 |
| 2096   | 2017 | -0.76 | 0.04 | 1.133281 | 1.2843258  | 22.08316 | 0.012447 | 41.62 |
| 2096   | 2017 | -0.76 | 0.04 | 1.133281 | 1.2843258  | 22.08316 | 0.012447 | 41.62 |
| 2096   | 2017 | -0.59 | 0.04 | 1.133281 | 1.2843258  | 22.08316 | 0.012447 | 41.62 |
| 2096   | 2017 | -0.76 | 0.04 | 1.133281 | 1.2843258  | 21.86823 | 0.012447 | 41.62 |
| 2096   | 2017 | -0.76 | 0.04 | 1.133281 | 1.2843258  | 22.08316 | 0.012447 | 41.62 |
| 2096   | 2017 | -0.61 | 0.04 | 1.133281 | 1.2843258  | 22.08316 | 0.012447 | 41.62 |
| 2096   | 2017 | -0.61 | 0.04 | 1.133281 | 1.2843258  | 22.08316 | 0.012447 | 41.62 |
| 2096   | 2017 | -0.09 | 0.04 | 1.133281 | 1.2843258  | 22.08316 | 0.012447 | 41.62 |
| 2096   | 2017 | -0.76 | 0.04 | 1.133281 | 1.2843258  | 22.08316 | 0.012447 | 41.62 |
| 2096   | 2017 | -0.76 | 0.04 | 1.133281 | 1.2843258  | 22.08316 | 0.012447 | 41.62 |
| 300114 | 2017 | 0.306 | 0.04 | 0.900748 | 0.81134653 | 21.51691 | 0.095899 | 50.51 |
| 300114 | 2017 | 0.725 | 0.04 | 0.900748 | 0.81134653 | 21.51691 | 0.095899 | 50.51 |
| 300114 | 2017 | 0.155 | 0.04 | 0.900748 | 0.81134653 | 21.51691 | 0.095899 | 50.51 |
| 300114 | 2017 | 0.155 | 0.04 | 0.900748 | 0.81134653 | 21.51691 | 0.095899 | 50.51 |
| 300114 | 2017 | -0.43 | 0.04 | 0.900748 | 0.81134653 | 21.51691 | 0.095899 | 50.51 |
| 300114 | 2017 | 0.725 | 0.04 | 0.900748 | 0.81134653 | 21.11044 | 0.095899 | 50.51 |
| 300114 | 2017 | -0.29 | 0.04 | 0.900748 | 0.81134653 | 21.51691 | 0.095899 | 50.51 |
| 300114 | 2017 | -0.24 | 0.04 | 0.900748 | 0.81134653 | 21.51691 | 0.095899 | 50.51 |
| 2759   | 2017 | -0.19 | 0.02 | 1.750938 | 3.0657833  | 22.04132 | 0.006626 | 27.22 |
| 2584   | 2017 | -0.48 | 0.02 | 1.750938 | 3.0657833  | 21.63273 | 0.047927 | 15.79 |
| 300093 | 2017 | -0.27 | 0.02 | 1.750938 | 3.0657833  | 21.15682 | 0.019979 | 11.24 |
| 2292   | 2017 | -0.15 | 0.02 | 1.750938 | 3.0657833  | 22.8472  | 0.01396  | 44.36 |
| 2292   | 2017 | 1.01  | 0.02 | 1.750938 | 3.0657833  | 22.8472  | 0.01396  | 44.36 |
| 603398 | 2017 | -0.53 | 0.02 | 1.750938 | 3.0657833  | 20.39095 | 0.099326 | 30.42 |
| 601515 | 2017 | -0.3  | 0.02 | 1.750938 | 3.0657833  | 22.46154 | 0.165231 | 54.4  |
| 601515 | 2017 | -0.52 | 0.02 | 1.750938 | 3.0657833  | 22.46154 | 0.165231 | 54.4  |
| 601515 | 2017 | -0.4  | 0.02 | 1.750938 | 3.0657833  | 22.46154 | 0.165231 | 54.4  |
| 300093 | 2017 | -0.25 | 0.02 | 1.750938 | 3.0657833  | 21.15682 | 0.019979 | 11.24 |
| 600978 | 2017 | -0.17 | 0.02 | 1.750938 | 3.0657833  | 23.53876 | 0.093784 | 29.02 |
| 600978 | 2017 | -0.17 | 0.02 | 1.750938 | 3.0657833  | 23.53876 | 0.093784 | 29.02 |
| 300043 | 2017 | -0.08 | 0.02 | 1.750938 | 3.0657833  | 22.51163 | 0.094637 | 32.77 |
| 600978 | 2017 | -0.17 | 0.02 | 1.750938 | 3.0657833  | 23.53876 | 0.093784 | 29.02 |
| 600978 | 2017 | -0.83 | 0.02 | 1.750938 | 3.0657833  | 23.53876 | 0.093784 | 29.02 |
| 300281 | 2017 | -0.37 | 0.02 | 1.750938 | 3.0657833  | 21.15337 | 0.029538 | 38.84 |
| 601515 | 2017 | -0.52 | 0.02 | 1.750938 | 3.0657833  | 22.46154 | 0.165231 | 54.4  |
| 2584   | 2017 | 0.843 | 0.02 | 1.750938 | 3.0657833  | 21.63273 | 0.047927 | 15.79 |

|        |      |       |      |          |           |          |          |       |
|--------|------|-------|------|----------|-----------|----------|----------|-------|
| 600978 | 2017 | 0.494 | 0.02 | 1.750938 | 3.0657833 | 23.53876 | 0.093784 | 29.02 |
| 300057 | 2017 | -0.6  | 0.02 | 1.750938 | 3.0657833 | 22.44352 | 0.032151 | 41.9  |
| 2759   | 2017 | -0.19 | 0.02 | 1.750938 | 3.0657833 | 22.04132 | 0.006626 | 27.22 |
| 2759   | 2017 | 0.001 | 0.02 | 1.750938 | 3.0657833 | 22.04132 | 0.006626 | 27.22 |
| 2292   | 2017 | -0.13 | 0.02 | 1.750938 | 3.0657833 | 22.8472  | 0.01396  | 44.36 |
| 2741   | 2017 | 0.826 | 0.02 | 1.750938 | 3.0657833 | 21.17951 | 0.081985 | 34.52 |
| 2292   | 2017 | -0.15 | 0.02 | 1.750938 | 3.0657833 | 22.8472  | 0.01396  | 44.36 |
| 2584   | 2017 | 0.843 | 0.02 | 1.750938 | 3.0657833 | 21.63273 | 0.047927 | 15.79 |
| 2759   | 2017 | 0.001 | 0.02 | 1.750938 | 3.0657833 | 22.04132 | 0.006626 | 27.22 |
| 300057 | 2017 | -0.26 | 0.02 | 1.750938 | 3.0657833 | 22.44352 | 0.032151 | 41.9  |
| 2584   | 2017 | 0.843 | 0.02 | 1.750938 | 3.0657833 | 21.63273 | 0.047927 | 15.79 |
| 2212   | 2017 | 1.255 | 0.02 | 1.750938 | 3.0657833 | 22.9876  | 0.053047 | 23.26 |
| 300093 | 2017 | -0.51 | 0.02 | 1.750938 | 3.0657833 | 20.83782 | 0.019979 | 11.24 |
| 300043 | 2017 | -0.12 | 0.02 | 1.750938 | 3.0657833 | 22.51163 | 0.094637 | 32.77 |
| 300281 | 2017 | -0.51 | 0.02 | 1.750938 | 3.0657833 | 21.15337 | 0.029538 | 38.84 |
| 2292   | 2017 | 0.064 | 0.02 | 1.750938 | 3.0657833 | 22.8472  | 0.01396  | 44.36 |
| 600978 | 2017 | -0.17 | 0.02 | 1.750938 | 3.0657833 | 23.53876 | 0.093784 | 29.02 |
| 2212   | 2017 | 1.341 | 0.02 | 1.750938 | 3.0657833 | 22.9876  | 0.053047 | 23.26 |
| 2212   | 2017 | 1.341 | 0.02 | 1.750938 | 3.0657833 | 22.9876  | 0.053047 | 23.26 |
| 603398 | 2017 | -0.53 | 0.02 | 1.750938 | 3.0657833 | 20.39107 | 0.099326 | 30.42 |
| 300043 | 2017 | -0.28 | 0.02 | 1.750938 | 3.0657833 | 22.18897 | 0.094637 | 32.77 |
| 300057 | 2017 | -0.32 | 0.02 | 1.750938 | 3.0657833 | 21.79264 | 0.032151 | 41.9  |
| 300057 | 2017 | -0.26 | 0.02 | 1.750938 | 3.0657833 | 22.44352 | 0.032151 | 41.9  |
| 2292   | 2017 | 0.291 | 0.02 | 1.750938 | 3.0657833 | 22.8472  | 0.01396  | 44.36 |
| 2292   | 2017 | -0.15 | 0.02 | 1.750938 | 3.0657833 | 22.8472  | 0.01396  | 44.36 |
| 600978 | 2017 | -0.17 | 0.02 | 1.750938 | 3.0657833 | 23.53876 | 0.093784 | 29.02 |
| 601515 | 2017 | 0.137 | 0.02 | 1.750938 | 3.0657833 | 22.10538 | 0.165231 | 54.4  |
| 2292   | 2017 | 0.33  | 0.02 | 1.750938 | 3.0657833 | 22.8472  | 0.01396  | 44.36 |
| 601515 | 2017 | 0.358 | 0.02 | 1.750938 | 3.0657833 | 22.46154 | 0.165231 | 54.4  |
| 601515 | 2017 | -0.52 | 0.02 | 1.750938 | 3.0657833 | 22.46154 | 0.165231 | 54.4  |
| 2441   | 2017 | -0.64 | 0.02 | 1.750938 | 3.0657833 | 22.37227 | 0.05117  | 29.1  |
| 2212   | 2017 | 0.017 | 0.02 | 1.750938 | 3.0657833 | 22.9876  | 0.053047 | 23.26 |
| 2433   | 2017 | -0.88 | 0.02 | 1.750938 | 3.0657833 | 22.82189 | 0.058549 | 32.72 |
| 2292   | 2017 | 0.064 | 0.02 | 1.750938 | 3.0657833 | 22.8472  | 0.01396  | 44.36 |
| 2433   | 2017 | -0.88 | 0.02 | 1.750938 | 3.0657833 | 22.82189 | 0.058549 | 32.72 |
| 2292   | 2017 | -0.2  | 0.02 | 1.750938 | 3.0657833 | 22.8472  | 0.01396  | 44.36 |
| 823    | 2017 | -0.39 | 0.02 | 1.750938 | 3.0657833 | 22.35142 | 0.068864 | 30.31 |
| 2584   | 2017 | 0.843 | 0.02 | 1.750938 | 3.0657833 | 21.63273 | 0.047927 | 15.79 |
| 2433   | 2017 | -0.88 | 0.02 | 1.750938 | 3.0657833 | 22.82189 | 0.058549 | 32.72 |
| 2441   | 2017 | -0.91 | 0.02 | 1.750938 | 3.0657833 | 22.14493 | 0.05117  | 29.1  |
| 2584   | 2017 | 0.622 | 0.02 | 1.750938 | 3.0657833 | 21.63273 | 0.047927 | 15.79 |
| 2212   | 2017 | 1.255 | 0.02 | 1.750938 | 3.0657833 | 22.9876  | 0.053047 | 23.26 |
| 600978 | 2017 | -0.38 | 0.02 | 1.750938 | 3.0657833 | 23.45227 | 0.093784 | 29.02 |
| 600978 | 2017 | -0.17 | 0.02 | 1.750938 | 3.0657833 | 23.53876 | 0.093784 | 29.02 |
| 150    | 2017 | -0.61 | 0.02 | 1.750938 | 3.0657833 | 22.75408 | 0.077636 | 37.08 |
| 2212   | 2017 | 1.255 | 0.02 | 1.750938 | 3.0657833 | 22.9876  | 0.053047 | 23.26 |
| 300281 | 2017 | -0.51 | 0.02 | 1.750938 | 3.0657833 | 21.04601 | 0.029538 | 38.84 |
| 300281 | 2017 | -0.32 | 0.02 | 1.750938 | 3.0657833 | 21.15337 | 0.029538 | 38.84 |
| 150    | 2017 | -0.61 | 0.02 | 1.750938 | 3.0657833 | 22.31787 | 0.077636 | 37.08 |
| 2292   | 2017 | -0.2  | 0.02 | 1.750938 | 3.0657833 | 22.8472  | 0.01396  | 44.36 |
| 2741   | 2017 | 0.826 | 0.02 | 1.750938 | 3.07E+00  | 21.17951 | 0.081985 | 34.52 |
| 534    | 2017 | 0.655 | 0.02 | 1.750938 | 3.07E+00  | 21.60293 | 0.049943 | 52.28 |
| 2584   | 2017 | 0.181 | 0.02 | 1.750938 | 3.07E+00  | 21.63273 | 0.047927 | 15.79 |
| 300057 | 2017 | -0.6  | 0.02 | 1.750938 | 3.07E+00  | 22.44352 | 0.032151 | 41.9  |

|        |      |       |      |          |           |          |          |       |
|--------|------|-------|------|----------|-----------|----------|----------|-------|
| 2345   | 2017 | -0.77 | 0.02 | 1.750938 | 3.07E+00  | 22.4099  | 0.08197  | 28.01 |
| 2584   | 2017 | 0.843 | 0.02 | 1.750938 | 3.07E+00  | 21.63273 | 0.047927 | 15.79 |
| 2759   | 2017 | -0.19 | 0.02 | 1.750938 | 3.07E+00  | 22.04132 | 0.006626 | 27.22 |
| 300043 | 2017 | -0.28 | 0.02 | 1.750938 | 3.07E+00  | 22.51163 | 0.094637 | 32.77 |
| 2292   | 2017 | -0.15 | 0.02 | 1.750938 | 3.07E+00  | 22.8472  | 0.01396  | 44.36 |
| 600978 | 2017 | -0.46 | 0.02 | 1.750938 | 3.07E+00  | 23.53876 | 0.093784 | 29.02 |
| 823    | 2017 | -0.63 | 0.02 | 1.750938 | 3.07E+00  | 22.35142 | 0.068864 | 30.31 |
| 2292   | 2017 | 0.818 | 0.02 | 1.750938 | 3.0657833 | 22.8472  | 0.01396  | 44.36 |
| 300057 | 2017 | -0.18 | 0.02 | 1.750938 | 3.0657833 | 22.44352 | 0.032151 | 41.9  |
| 601515 | 2017 | -0.45 | 0.02 | 1.750938 | 3.0657833 | 22.46154 | 0.165231 | 54.4  |
| 2292   | 2017 | -0.15 | 0.02 | 1.750938 | 3.0657833 | 22.8472  | 0.01396  | 44.36 |
| 2212   | 2017 | 1.255 | 0.02 | 1.750938 | 3.0657833 | 22.9876  | 0.053047 | 23.26 |
| 2441   | 2017 | -0.91 | 0.02 | 1.750938 | 3.0657833 | 22.37227 | 0.05117  | 29.1  |
| 601515 | 2017 | -0.52 | 0.02 | 1.750938 | 3.0657833 | 22.46154 | 0.165231 | 54.4  |
| 600978 | 2017 | -0.17 | 0.02 | 1.750938 | 3.0657833 | 23.53876 | 0.093784 | 29.02 |
| 2345   | 2017 | -0.77 | 0.02 | 1.750938 | 3.0657833 | 22.33653 | 0.08197  | 28.01 |
| 2441   | 2017 | -0.72 | 0.02 | 1.750938 | 3.0657833 | 22.37227 | 0.05117  | 29.1  |
| 2433   | 2017 | -0.88 | 0.02 | 1.750938 | 3.0657833 | 22.82189 | 0.058549 | 32.72 |
| 2292   | 2017 | -0.2  | 0.02 | 1.750938 | 3.0657833 | 22.8472  | 0.01396  | 44.36 |
| 600978 | 2017 | -0.17 | 0.02 | 1.750938 | 3.0657833 | 23.53876 | 0.093784 | 29.02 |
| 2759   | 2017 | -0.33 | 0.02 | 1.750938 | 3.0657833 | 22.04132 | 0.006626 | 27.22 |
| 300043 | 2017 | -0.09 | 0.02 | 1.750938 | 3.0657833 | 22.51163 | 0.094637 | 32.77 |
| 300043 | 2017 | -0.09 | 0.02 | 1.750938 | 3.0657833 | 22.51163 | 0.094637 | 32.77 |
| 534    | 2017 | 0.465 | 0.02 | 1.750938 | 3.0657833 | 21.39129 | 0.049943 | 52.28 |
| 150    | 2017 | -0.61 | 0.02 | 1.750938 | 3.0657833 | 22.75408 | 0.077636 | 37.08 |
| 2759   | 2017 | -0.07 | 0.02 | 1.750938 | 3.0657833 | 21.96991 | 0.006626 | 27.22 |
| 823    | 2017 | -0.44 | 0.02 | 1.750938 | 3.0657833 | 22.35142 | 0.068864 | 30.31 |
| 2433   | 2017 | -0.88 | 0.02 | 1.750938 | 3.0657833 | 22.73936 | 0.058549 | 32.72 |
| 300281 | 2017 | -0.51 | 0.02 | 1.750938 | 3.0657833 | 21.15337 | 0.029538 | 38.84 |
| 300043 | 2017 | -0.28 | 0.02 | 1.750938 | 3.0657833 | 22.51163 | 0.094637 | 32.77 |
| 534    | 2017 | 0.781 | 0.02 | 1.750938 | 3.0657833 | 21.60293 | 0.049943 | 52.28 |
| 823    | 2017 | -0.39 | 0.02 | 1.750938 | 3.0657833 | 22.35142 | 0.068864 | 30.31 |
| 2292   | 2017 | -0.15 | 0.02 | 1.750938 | 3.0657833 | 22.8472  | 0.01396  | 44.36 |
| 300093 | 2017 | -0.07 | 0.02 | 1.750938 | 3.0657833 | 21.15682 | 0.019979 | 11.24 |
| 2584   | 2017 | 0.843 | 0.02 | 1.750938 | 3.0657833 | 21.63273 | 0.047927 | 15.79 |
| 534    | 2017 | 0.781 | 0.02 | 1.750938 | 3.0657833 | 21.60293 | 0.049943 | 52.28 |
| 150    | 2017 | -0.61 | 0.02 | 1.750938 | 3.0657833 | 22.75408 | 0.028672 | 37.08 |
| 2762   | 2017 | -0.64 | 0.02 | 1.750938 | 3.0657833 | 20.81159 | 0.09521  | 30.07 |
| 2292   | 2017 | -0.15 | 0.02 | 1.750938 | 3.0657833 | 22.8472  | 0.01396  | 44.36 |
| 300057 | 2017 | -0.31 | 0.02 | 1.750938 | 3.0657833 | 22.44352 | 0.032151 | 41.9  |
| 601515 | 2017 | -0.52 | 0.02 | 1.750938 | 3.0657833 | 22.46154 | 0.165231 | 54.4  |
| 2292   | 2017 | -0.2  | 0.02 | 1.750938 | 3.0657833 | 22.60799 | 0.01396  | 44.36 |
| 823    | 2017 | -0.39 | 0.02 | 1.750938 | 3.0657833 | 22.35142 | 0.068864 | 30.31 |
| 2212   | 2017 | 1.341 | 0.02 | 1.750938 | 3.0657833 | 22.9876  | 0.053047 | 23.26 |
| 300057 | 2017 | -0.6  | 0.02 | 1.750938 | 3.0657833 | 22.44352 | 0.032151 | 41.9  |
| 300043 | 2017 | -0.09 | 0.02 | 1.750938 | 3.0657833 | 22.51163 | 0.094637 | 32.77 |
| 823    | 2017 | -0.5  | 0.02 | 1.750938 | 3.0657833 | 22.35142 | 0.068864 | 30.31 |
| 534    | 2017 | 0.655 | 0.02 | 1.750938 | 3.0657833 | 21.60293 | 0.049943 | 52.28 |
| 823    | 2017 | -0.44 | 0.02 | 1.750938 | 3.0657833 | 22.35142 | 0.068864 | 30.31 |
| 2433   | 2017 | -0.88 | 0.02 | 1.750938 | 3.0657833 | 22.82189 | 0.058549 | 32.72 |
| 2759   | 2017 | -0.24 | 0.02 | 1.750938 | 3.0657833 | 22.04132 | 0.006626 | 27.22 |
| 2762   | 2017 | -0.64 | 0.02 | 1.750938 | 3.0657833 | 20.81579 | 0.09521  | 30.07 |
| 601515 | 2017 | -0.17 | 0.02 | 1.750938 | 3.0657833 | 22.46154 | 0.165231 | 54.4  |
| 2741   | 2017 | 0.826 | 0.02 | 1.750938 | 3.0657833 | 21.06962 | 0.081985 | 34.52 |

|        |      |       |      |          |            |          |          |       |
|--------|------|-------|------|----------|------------|----------|----------|-------|
| 2584   | 2017 | 0.578 | 0.02 | 1.750938 | 3.0657833  | 21.54686 | 0.047927 | 15.79 |
| 603398 | 2017 | -0.53 | 0.02 | 1.750938 | 3.0657833  | 20.39095 | 0.099326 | 30.42 |
| 600978 | 2017 | -0.17 | 0.02 | 1.750938 | 3.0657833  | 23.53876 | 0.093784 | 29.02 |
| 2292   | 2017 | 0.752 | 0.02 | 1.750938 | 3.0657833  | 22.8472  | 0.01396  | 44.36 |
| 150    | 2017 | -0.61 | 0.02 | 1.750938 | 3.0657833  | 22.75408 | 0.077636 | 37.08 |
| 601515 | 2017 | -0.11 | 0.02 | 1.750938 | 3.0657833  | 22.46154 | 0.165231 | 54.4  |
| 300093 | 2017 | -0.23 | 0.02 | 1.750938 | 3.0657833  | 21.15682 | 0.019979 | 11.24 |
| 2584   | 2017 | 0.843 | 0.02 | 1.750938 | 3.0657833  | 21.63273 | 0.047927 | 15.79 |
| 300093 | 2017 | -0.51 | 0.02 | 1.750938 | 3.0657833  | 21.15682 | 0.019979 | 11.24 |
| 150    | 2017 | -0.61 | 0.02 | 1.750938 | 3.0657833  | 22.75408 | 0.077636 | 37.08 |
| 823    | 2017 | -0.39 | 0.02 | 1.750938 | 3.0657833  | 22.35142 | 0.068864 | 30.31 |
| 2212   | 2017 | 1.255 | 0.02 | 1.750938 | 3.0657833  | 22.801   | 0.053047 | 23.26 |
| 2345   | 2017 | -0.77 | 0.02 | 1.750938 | 3.0657833  | 22.4099  | 0.08197  | 28.01 |
| 2441   | 2017 | -0.72 | 0.02 | 1.750938 | 3.0657833  | 22.37227 | 0.05117  | 29.1  |
| 823    | 2017 | -0.54 | 0.02 | 1.750938 | 3.0657833  | 22.35142 | 0.068864 | 30.31 |
| 823    | 2017 | -0.39 | 0.02 | 1.750938 | 3.0657833  | 21.84632 | 0.068864 | 30.31 |
| 300057 | 2017 | -0.32 | 0.02 | 1.750938 | 3.0657833  | 22.44352 | 0.032151 | 41.9  |
| 600978 | 2017 | -0.26 | 0.02 | 1.750938 | 3.0657833  | 23.53876 | 0.093784 | 29.02 |
| 2741   | 2017 | 0.826 | 0.02 | 1.750938 | 3.0657833  | 21.17951 | 0.081985 | 34.52 |
| 300281 | 2017 | -0.32 | 0.02 | 1.750938 | 3.0657833  | 21.15337 | 0.029538 | 38.84 |
| 601515 | 2017 | -0.08 | 0.02 | 1.750938 | 3.0657833  | 22.46154 | 0.165231 | 54.4  |
| 601515 | 2017 | 0.579 | 0.02 | 1.750938 | 3.0657833  | 22.46154 | 0.165231 | 54.4  |
| 534    | 2017 | 1.222 | 0.02 | 1.750938 | 3.0657833  | 21.60293 | 0.049943 | 52.28 |
| 2212   | 2017 | 0.017 | 0.02 | 1.750938 | 3.0657833  | 22.9876  | 0.053047 | 23.26 |
| 300057 | 2017 | -0.31 | 0.02 | 1.750938 | 3.0657833  | 22.44352 | 0.032151 | 41.9  |
| 823    | 2017 | -0.52 | 0.02 | 1.750938 | 3.0657833  | 22.35142 | 0.068864 | 30.31 |
| 2762   | 2017 | -0.64 | 0.02 | 1.750938 | 3.0657833  | 20.81159 | 0.09521  | 30.07 |
| 601515 | 2017 | -0.07 | 0.02 | 1.750938 | 3.0657833  | 22.46154 | 0.165231 | 54.4  |
| 823    | 2017 | -0.63 | 0.02 | 1.750938 | 3.0657833  | 22.35142 | 0.068864 | 30.31 |
| 2741   | 2017 | 0.826 | 0.02 | 1.750938 | 3.0657833  | 21.17951 | 0.081985 | 34.52 |
| 2741   | 2017 | 0.826 | 0.02 | 1.750938 | 3.0657833  | 21.17951 | 0.081985 | 34.52 |
| 2292   | 2017 | -0.05 | 0.02 | 1.750938 | 3.0657833  | 22.8472  | 0.01396  | 44.36 |
| 2292   | 2017 | -0.16 | 0.02 | 1.750938 | 3.0657833  | 22.8472  | 0.01396  | 44.36 |
| 300409 | 2017 | 0.75  | 0.02 | 0.693147 | 0.48045301 | 22.03484 | 0.113178 | 37.03 |
| 300409 | 2017 | 1.028 | 0.02 | 0.693147 | 0.48045301 | 22.03484 | 0.113178 | 37.03 |
| 782    | 2017 | 0.326 | 0.02 | 0.693147 | 0.48045301 | 21.69196 | 0.029739 | 28.5  |
| 2600   | 2017 | -0.68 | 0.02 | 0.693147 | 0.48045301 | 23.42181 | 0.211487 | 18.46 |
| 2723   | 2017 | -0.65 | 0.02 | 0.693147 | 0.48045301 | 20.76846 | 0.011726 | 37.52 |
| 576    | 2017 | 0.592 | 0.02 | 0.693147 | 0.48045301 | 20.91361 | -0.27693 | 41.55 |
| 300149 | 2017 | -0.45 | 0.02 | 0.693147 | 0.48045301 | 20.76554 | 0.067358 | 19    |
| 2600   | 2017 | -0.41 | 0.02 | 0.693147 | 0.48045301 | 23.42181 | 0.211487 | 18.46 |
| 976    | 2017 | -0.27 | 0.02 | 0.693147 | 0.48045301 | 21.99612 | 0.120767 | 18.88 |
| 300403 | 2017 | 0.773 | 0.02 | 0.693147 | 0.48045301 | 21.23193 | 0.107449 | 47.57 |
| 300409 | 2017 | 0.887 | 0.02 | 0.693147 | 0.48045301 | 22.03484 | 0.113178 | 37.03 |
| 300403 | 2017 | -0.09 | 0.02 | 0.693147 | 0.48045301 | 21.23193 | 0.107449 | 47.57 |
| 300403 | 2017 | 0.016 | 0.02 | 0.693147 | 0.48045301 | 21.23193 | 0.107449 | 47.57 |
| 2600   | 2017 | -0.49 | 0.02 | 0.693147 | 0.48045301 | 23.42181 | 0.211487 | 18.46 |
| 2723   | 2017 | -0.67 | 0.02 | 0.693147 | 0.48045301 | 20.76448 | 0.011726 | 37.52 |
| 2723   | 2017 | -0.66 | 0.02 | 0.693147 | 0.48045301 | 20.76448 | 0.011726 | 37.52 |
| 2600   | 2017 | -0.49 | 0.02 | 0.693147 | 0.48045301 | 23.42181 | 0.211487 | 18.46 |
| 2600   | 2017 | -0.35 | 0.02 | 0.693147 | 0.48045301 | 23.42181 | 0.211487 | 18.46 |
| 576    | 2017 | 0.592 | 0.02 | 0.693147 | 0.48045301 | 20.91986 | -0.27693 | 41.55 |
| 300403 | 2017 | -0.09 | 0.02 | 0.693147 | 0.48045301 | 21.23193 | 0.107449 | 47.57 |
| 300149 | 2017 | 0.876 | 0.02 | 0.693147 | 0.48045301 | 20.76554 | 0.067358 | 19    |

|        |      |       |      |          |            |          |          |       |
|--------|------|-------|------|----------|------------|----------|----------|-------|
| 2600   | 2017 | -0.35 | 0.02 | 0.693147 | 0.48045301 | 22.82788 | 0.211487 | 18.46 |
| 300409 | 2017 | 1.028 | 0.02 | 0.693147 | 0.48045301 | 22.03484 | 0.113178 | 37.03 |
| 782    | 2017 | 0.326 | 0.02 | 0.693147 | 0.48045301 | 21.69196 | 0.029739 | 28.5  |
| 300403 | 2017 | 0.079 | 0.02 | 0.693147 | 0.48045301 | 21.23193 | 0.107449 | 47.57 |
| 2600   | 2017 | -0.35 | 0.02 | 0.693147 | 0.48045301 | 23.42181 | 0.211487 | 18.46 |
| 300149 | 2017 | 0.592 | 0.02 | 0.693147 | 0.48045301 | 20.76554 | 0.067358 | 19    |
| 2600   | 2017 | -0.35 | 0.02 | 0.693147 | 0.48045301 | 23.42181 | 0.211487 | 18.46 |
| 2723   | 2017 | -0.65 | 0.02 | 0.693147 | 0.48045301 | 20.76448 | 0.011726 | 37.52 |
| 300340 | 2017 | 0.488 | 0.02 | 0.693147 | 0.48045301 | 21.96014 | 0.083969 | 19.14 |
| 782    | 2017 | 0.326 | 0.02 | 0.693147 | 0.48045301 | 21.69196 | 0.029739 | 28.5  |
| 300403 | 2017 | 0.773 | 0.02 | 0.693147 | 0.48045301 | 21.23193 | 0.107449 | 47.57 |
| 2600   | 2017 | -0.49 | 0.02 | 0.693147 | 0.48045301 | 23.42181 | 0.211487 | 18.46 |
| 2600   | 2017 | -0.35 | 0.02 | 0.693147 | 0.48045301 | 23.42181 | 0.211487 | 18.46 |
| 2600   | 2017 | -0.35 | 0.02 | 0.693147 | 0.48045301 | 23.42181 | 0.211487 | 18.46 |
| 300340 | 2017 | -0.39 | 0.02 | 0.693147 | 0.48045301 | 21.96014 | 0.083969 | 19.14 |
| 782    | 2017 | 0.326 | 0.02 | 0.693147 | 0.48045301 | 21.69196 | 0.029739 | 28.5  |
| 300409 | 2017 | 0.751 | 0.02 | 0.693147 | 0.48045301 | 22.03484 | 0.113178 | 37.03 |
| 300409 | 2017 | 1.028 | 0.02 | 0.693147 | 0.48045301 | 22.03484 | 0.113178 | 37.03 |
| 300149 | 2017 | 0.545 | 0.02 | 0.693147 | 0.48045301 | 20.5519  | 0.067358 | 19    |
| 300340 | 2017 | 0.268 | 0.02 | 0.693147 | 0.48045301 | 21.96014 | 0.083969 | 19.14 |
| 300340 | 2017 | 0.268 | 0.02 | 0.693147 | 0.48045301 | 21.60629 | 0.083969 | 19.14 |
| 300403 | 2017 | 0.243 | 0.02 | 0.693147 | 0.48045301 | 21.23193 | 0.107449 | 47.57 |
| 782    | 2017 | 0.326 | 0.02 | 0.693147 | 0.48045301 | 21.69196 | 0.029739 | 28.5  |
| 300340 | 2017 | 0.741 | 0.02 | 0.693147 | 0.48045301 | 21.96014 | 0.083969 | 19.14 |
| 300409 | 2017 | 1.028 | 0.02 | 0.693147 | 0.48045301 | 22.03484 | 0.113178 | 37.03 |
| 300409 | 2017 | 1.028 | 0.02 | 0.693147 | 0.48045301 | 21.52977 | 0.113178 | 37.03 |
| 2600   | 2017 | -0.63 | 0.02 | 0.693147 | 0.48045301 | 23.42181 | 0.211487 | 18.46 |
| 300409 | 2017 | 1.028 | 0.02 | 0.693147 | 0.48045301 | 22.03484 | 0.113178 | 37.03 |
| 2600   | 2017 | -0.68 | 0.02 | 0.693147 | 0.48045301 | 23.42181 | 0.211487 | 18.46 |
| 2600   | 2017 | 0.421 | 0.02 | 0.693147 | 0.48045301 | 23.42181 | 0.211487 | 18.46 |
| 300409 | 2017 | 0.735 | 0.02 | 0.693147 | 0.48045301 | 22.03484 | 0.113178 | 37.03 |
| 576    | 2017 | 0.592 | 0.02 | 0.693147 | 0.48045301 | 20.91361 | -0.27693 | 41.55 |
| 300340 | 2017 | 0.741 | 0.02 | 0.693147 | 0.48045301 | 21.96014 | 0.083969 | 19.14 |
| 2600   | 2017 | -0.21 | 0.02 | 0.693147 | 0.48045301 | 23.42181 | 0.211487 | 18.46 |
| 976    | 2017 | -0.27 | 0.02 | 0.693147 | 0.48045301 | 22.32454 | 0.120767 | 18.88 |
| 300149 | 2017 | 0.592 | 0.02 | 0.693147 | 0.48045301 | 20.76554 | 0.067358 | 19    |
| 300340 | 2017 | -0.39 | 0.02 | 0.693147 | 0.48045301 | 21.96014 | 0.083969 | 19.14 |
| 300409 | 2017 | 0.649 | 0.02 | 0.693147 | 0.48045301 | 22.03484 | 0.113178 | 37.03 |
| 2600   | 2017 | -0.35 | 0.02 | 0.693147 | 0.48045301 | 23.42181 | 0.211487 | 18.46 |
| 782    | 2017 | 0.326 | 0.02 | 0.693147 | 0.48045301 | 21.62105 | 0.029739 | 28.5  |
| 2600   | 2017 | -0.68 | 0.02 | 0.693147 | 0.48045301 | 23.42181 | 0.211487 | 18.46 |
| 300403 | 2017 | 0.773 | 0.02 | 0.693147 | 0.48045301 | 21.23193 | 0.107449 | 47.57 |
| 300149 | 2017 | 0.523 | 0.02 | 0.693147 | 0.48045301 | 20.76554 | 0.067358 | 19    |
| 2600   | 2017 | -0.68 | 0.02 | 0.693147 | 0.48045301 | 23.42181 | 0.211487 | 18.46 |
| 300149 | 2017 | 0.876 | 0.02 | 0.693147 | 0.48045301 | 20.76554 | 0.067358 | 19    |
| 576    | 2017 | 0.592 | 0.02 | 0.693147 | 0.48045301 | 20.91361 | -0.27693 | 41.55 |
| 300409 | 2017 | -0.03 | 0.02 | 0.693147 | 0.48045301 | 22.03484 | 0.113178 | 37.03 |
| 976    | 2017 | -0.27 | 0.02 | 0.693147 | 0.48045301 | 22.32454 | 0.120767 | 18.88 |
| 2600   | 2017 | -0.35 | 0.02 | 0.693147 | 0.48045301 | 23.42181 | 0.211487 | 18.46 |
| 2723   | 2017 | -0.67 | 0.02 | 0.693147 | 0.48045301 | 20.76448 | 0.011726 | 37.52 |
| 2600   | 2017 | -0.68 | 0.02 | 0.693147 | 0.48045301 | 23.42181 | 0.211487 | 18.46 |
| 976    | 2017 | -0.27 | 0.02 | 0.693147 | 0.48045301 | 22.32454 | 0.120767 | 18.88 |
| 300403 | 2017 | 0.773 | 0.02 | 0.693147 | 0.48045301 | 21.21631 | 0.107449 | 47.57 |
| 300340 | 2017 | -0.39 | 0.02 | 0.693147 | 0.48045301 | 21.96014 | 0.083969 | 19.14 |



|        |      |       |      |          |            |          |          |         |
|--------|------|-------|------|----------|------------|----------|----------|---------|
| 300403 | 2017 | -0.15 | 0.02 | 0.693147 | 0.48045301 | 21.23193 | 0.107449 | 47.57   |
| 603609 | 2017 | -0.41 | 0    | 1.236763 | 1.5295815  | 22.51267 | 0.133454 | 17.62   |
| 300290 | 2017 | 1.465 | 0    | 1.236763 | 1.5295815  | 20.77627 | 0.022265 | 25.89   |
| 300290 | 2017 | 1.465 | 0    | 1.236763 | 1.5295815  | 20.77627 | 0.022265 | 25.89   |
| 410    | 2017 | -0.13 | 0    | 1.236763 | 1.5295815  | 23.78716 | 0.106122 | 30.13   |
| 300293 | 2017 | 0.274 | 0    | 1.236763 | 1.5295815  | 21.64335 | 0.016025 | 42.19   |
| 603609 | 2017 | -0.93 | 0    | 1.236763 | 1.5295815  | 22.51267 | 0.133454 | 17.62   |
| 410    | 2017 | -0.23 | 0    | 1.236763 | 1.5295815  | 23.78716 | 0.106122 | 30.13   |
| 300290 | 2017 | 1.465 | 0    | 1.236763 | 1.5295815  | 20.77627 | 0.022265 | 25.89   |
| 600609 | 2017 | -0.91 | 0    | 1.236763 | 1.5295815  | 21.74948 | 0.302158 | 24.38   |
| 597    | 2017 | 0.395 | 0    | 1.236763 | 1.5295815  | 23.08346 | 0.036129 | 21.05   |
| 603609 | 2017 | 0.397 | 0    | 1.236763 | 1.5295815  | 22.51267 | 0.133454 | 17.62   |
| 603609 | 2017 | -0.66 | 0    | 1.236763 | 1.5295815  | 22.51267 | 0.133454 | 17.62   |
| 600609 | 2017 | -0.91 | 0    | 1.236763 | 1.5295815  | 22.50653 | 0.302158 | 24.38   |
| 300024 | 2017 | 0.85  | 0    | 1.236763 | 1.5295815  | 22.85431 | 0.073787 | 25.27   |
| 597    | 2017 | 0.157 | 0    | 1.236763 | 1.5295815  | 23.08346 | 0.036129 | 21.05   |
| 698    | 2017 | -0.63 | 0    | 1.236763 | 1.5295815  | 23.01174 | 0.051957 | 26.68   |
| 600718 | 2017 | 2.101 | 0    | 1.236763 | 1.5295815  | 23.28121 | 0.098162 | 12.3772 |
| 300290 | 2017 | 1.465 | 0    | 1.236763 | 1.5295815  | 20.77627 | 0.022265 | 25.89   |
| 300024 | 2017 | 1.411 | 0    | 1.236763 | 1.5295815  | 22.85431 | 0.073787 | 25.27   |
| 597    | 2017 | 0.157 | 0    | 1.236763 | 1.5295815  | 23.08346 | 0.036129 | 21.05   |
| 300293 | 2017 | 0.274 | 0    | 1.236763 | 1.5295815  | 21.28605 | 0.016025 | 42.19   |
| 603866 | 2017 | -0.99 | 0    | 1.236763 | 1.5295815  | 21.73063 | 0.162648 | 24.96   |
| 2689   | 2017 | -0.36 | 0    | 1.236763 | 1.5295815  | 21.6471  | 0.022    | 40.53   |
| 600609 | 2017 | -0.91 | 0    | 1.236763 | 1.5295815  | 22.50653 | 0.302158 | 24.38   |
| 603866 | 2017 | -0.99 | 0    | 1.236763 | 1.5295815  | 21.98355 | 0.162648 | 24.96   |
| 600609 | 2017 | -0.85 | 0    | 1.236763 | 1.5295815  | 22.50653 | 0.302158 | 24.38   |
| 600609 | 2017 | -0.74 | 0    | 1.236763 | 1.5295815  | 22.50653 | 0.302158 | 24.38   |
| 300024 | 2017 | 1.07  | 0    | 1.236763 | 1.5295815  | 22.85431 | 0.073787 | 25.27   |
| 600715 | 2017 | 0.028 | 0    | 1.236763 | 1.5295815  | 23.07458 | 0.061056 | 20.35   |
| 600718 | 2017 | 1.658 | 0    | 1.236763 | 1.5295815  | 23.28121 | 0.098162 | 12.3772 |
| 600609 | 2017 | -0.91 | 0    | 1.236763 | 1.5295815  | 22.50653 | 0.302158 | 24.38   |
| 2731   | 2017 | -0.95 | 0    | 1.236763 | 1.5295815  | 21.08674 | 0.048645 | 30.53   |
| 410    | 2017 | -0.07 | 0    | 1.236763 | 1.5295815  | 23.68373 | 0.106122 | 30.13   |
| 600718 | 2017 | 1.987 | 0    | 1.236763 | 1.5295815  | 23.28121 | 0.098162 | 12.3772 |
| 600609 | 2017 | -0.91 | 0    | 1.236763 | 1.5295815  | 22.50653 | 0.302158 | 24.38   |
| 2689   | 2017 | -0.36 | 0    | 1.236763 | 1.5295815  | 21.6471  | 0.022    | 40.53   |
| 600718 | 2017 | 1.416 | 0    | 1.236763 | 1.5295815  | 23.15426 | 0.098162 | 12.3772 |
| 300024 | 2017 | 0.426 | 0    | 1.236763 | 1.5295815  | 22.85431 | 0.073787 | 25.27   |
| 603866 | 2017 | -0.99 | 0    | 1.236763 | 1.5295815  | 21.98355 | 0.162648 | 24.96   |
| 600167 | 2017 | -0.59 | 0    | 1.236763 | 1.5295815  | 23.13348 | 0.131876 | 48.48   |
| 603609 | 2017 | 0.397 | 0    | 1.236763 | 1.5295815  | 22.51267 | 0.133454 | 17.62   |
| 603609 | 2017 | 0.397 | 0    | 1.236763 | 1.5295815  | 22.51267 | 0.133454 | 17.62   |
| 603866 | 2017 | -0.99 | 0    | 1.236763 | 1.5295815  | 21.98355 | 0.162648 | 24.96   |
| 603609 | 2017 | 0.397 | 0    | 1.236763 | 1.5295815  | 22.51267 | 0.133454 | 17.62   |
| 698    | 2017 | -0.7  | 0    | 1.236763 | 1.5295815  | 23.01174 | 0.051957 | 26.68   |
| 300024 | 2017 | 1.411 | 0    | 1.236763 | 1.5295815  | 22.85431 | 0.073787 | 25.27   |
| 300573 | 2017 | 0.972 | 0    | 1.236763 | 1.5295815  | 20.33933 | 0.06946  | 31.71   |
| 2231   | 2017 | -0.37 | 0    | 1.236763 | 1.5295815  | 20.6999  | 0.013904 | 27.95   |
| 300293 | 2017 | 0.274 | 0    | 1.236763 | 1.5295815  | 21.64335 | 0.016025 | 42.19   |
| 698    | 2017 | -0.47 | 0    | 1.236763 | 1.5295815  | 23.01174 | 0.051957 | 26.68   |
| 2689   | 2017 | -0.36 | 0    | 1.236763 | 1.5295815  | 21.6471  | 0.022    | 40.53   |
| 600609 | 2017 | -0.91 | 0    | 1.236763 | 1.5295815  | 22.50653 | 0.302158 | 24.38   |
| 2731   | 2017 | -0.95 | 0    | 1.236763 | 1.5295815  | 21.68849 | 0.048645 | 30.53   |

|        |      |       |   |          |           |          |          |         |
|--------|------|-------|---|----------|-----------|----------|----------|---------|
| 600718 | 2017 | 1.365 | 0 | 1.236763 | 1.5295815 | 23.28121 | 0.098162 | 12.3772 |
| 600609 | 2017 | -0.9  | 0 | 1.236763 | 1.5295815 | 22.50653 | 0.302158 | 24.38   |
| 300024 | 2017 | 1.179 | 0 | 1.236763 | 1.5295815 | 22.85431 | 0.073787 | 25.27   |
| 600609 | 2017 | -0.91 | 0 | 1.236763 | 1.5295815 | 22.50653 | 0.302158 | 24.38   |
| 2689   | 2017 | -0.36 | 0 | 1.236763 | 1.5295815 | 21.6471  | 0.022    | 40.53   |
| 698    | 2017 | -0.47 | 0 | 1.236763 | 1.5295815 | 23.01174 | 0.051957 | 26.68   |
| 597    | 2017 | 0.598 | 0 | 1.236763 | 1.5295815 | 23.08346 | 0.036129 | 21.05   |
| 600718 | 2017 | 1.797 | 0 | 1.236763 | 1.5295815 | 23.28121 | 0.098162 | 12.3772 |
| 600167 | 2017 | -0.31 | 0 | 1.236763 | 1.5295815 | 23.13348 | 0.131876 | 48.48   |
| 603609 | 2017 | 0.397 | 0 | 1.236763 | 1.5295815 | 22.51267 | 0.133454 | 17.62   |
| 603609 | 2017 | 0.397 | 0 | 1.236763 | 1.5295815 | 22.51267 | 0.133454 | 17.62   |
| 597    | 2017 | 0.157 | 0 | 1.236763 | 1.5295815 | 23.08346 | 0.036129 | 21.05   |
| 2731   | 2017 | -0.95 | 0 | 1.236763 | 1.5295815 | 21.68849 | 0.048645 | 30.53   |
| 410    | 2017 | -0.13 | 0 | 1.236763 | 1.5295815 | 23.78716 | 0.106122 | 30.13   |
| 410    | 2017 | 0.21  | 0 | 1.236763 | 1.5295815 | 23.78716 | 0.106122 | 30.13   |
| 698    | 2017 | -0.55 | 0 | 1.236763 | 1.5295815 | 22.60639 | 0.051957 | 26.68   |
| 410    | 2017 | -0.19 | 0 | 1.236763 | 1.5295815 | 23.78716 | 0.106122 | 30.13   |
| 600167 | 2017 | -0.59 | 0 | 1.236763 | 1.5295815 | 23.13348 | 0.131876 | 48.48   |
| 603609 | 2017 | 0.397 | 0 | 1.236763 | 1.5295815 | 22.51267 | 0.133454 | 17.62   |
| 597    | 2017 | 0.598 | 0 | 1.236763 | 1.5295815 | 23.08346 | 0.036129 | 21.05   |
| 600715 | 2017 | 0.028 | 0 | 1.236763 | 1.5295815 | 22.89758 | 0.061056 | 20.35   |
| 2689   | 2017 | -0.36 | 0 | 1.236763 | 1.5295815 | 21.6471  | 0.022    | 40.53   |
| 603609 | 2017 | -0.13 | 0 | 1.236763 | 1.5295815 | 22.51267 | 0.133454 | 17.62   |
| 2231   | 2017 | -0.37 | 0 | 1.236763 | 1.5295815 | 20.71894 | 0.013904 | 27.95   |
| 600167 | 2017 | -0.31 | 0 | 1.236763 | 1.5295815 | 23.13348 | 0.131876 | 48.48   |
| 600718 | 2017 | 1.797 | 0 | 1.236763 | 1.5295815 | 23.28121 | 0.098162 | 12.3772 |
| 300290 | 2017 | 1.465 | 0 | 1.236763 | 1.5295815 | 20.87792 | 0.022265 | 25.89   |
| 300024 | 2017 | 0.667 | 0 | 1.236763 | 1.5295815 | 22.85431 | 0.073787 | 25.27   |
| 2689   | 2017 | -0.36 | 0 | 1.236763 | 1.5295815 | 21.68016 | 0.022    | 40.53   |
| 2689   | 2017 | -0.36 | 0 | 1.236763 | 1.5295815 | 21.6471  | 0.022    | 40.53   |
| 300573 | 2017 | 0.972 | 0 | 1.236763 | 1.5295815 | 20.33241 | 0.06946  | 31.71   |
| 597    | 2017 | -0.06 | 0 | 1.236763 | 1.5295815 | 23.08346 | 0.036129 | 21.05   |
| 300024 | 2017 | 0.78  | 0 | 1.236763 | 1.5295815 | 22.85431 | 0.073787 | 25.27   |
| 410    | 2017 | 0.21  | 0 | 1.236763 | 1.5295815 | 23.78716 | 0.106122 | 30.13   |
| 300024 | 2017 | 0.78  | 0 | 1.236763 | 1.5295815 | 22.85431 | 0.073787 | 25.27   |
| 2731   | 2017 | -0.95 | 0 | 1.236763 | 1.5295815 | 21.68849 | 0.048645 | 30.53   |
| 603609 | 2017 | 0.397 | 0 | 1.236763 | 1.5295815 | 22.51267 | 0.133454 | 17.62   |
| 698    | 2017 | -0.12 | 0 | 1.236763 | 1.5295815 | 23.01174 | 0.051957 | 26.68   |
| 2731   | 2017 | -0.95 | 0 | 1.236763 | 1.5295815 | 21.68849 | 0.048645 | 30.53   |
| 410    | 2017 | -0.16 | 0 | 1.236763 | 1.5295815 | 23.78716 | 0.106122 | 30.13   |
| 2731   | 2017 | -0.95 | 0 | 1.236763 | 1.5295815 | 21.68849 | 0.048645 | 30.53   |
| 300024 | 2017 | 0.984 | 0 | 1.236763 | 1.5295815 | 22.85431 | 0.073787 | 25.27   |
| 603866 | 2017 | -0.99 | 0 | 1.236763 | 1.5295815 | 21.98355 | 0.162648 | 24.96   |
| 600167 | 2017 | -0.31 | 0 | 1.236763 | 1.5295815 | 23.13348 | 0.131876 | 48.48   |
| 600609 | 2017 | -0.91 | 0 | 1.236763 | 1.5295815 | 22.50653 | 0.302158 | 24.38   |
| 603609 | 2017 | -0.84 | 0 | 1.236763 | 1.5295815 | 22.17504 | 0.133454 | 17.62   |
| 597    | 2017 | 0.598 | 0 | 1.236763 | 1.5295815 | 22.75186 | 0.036129 | 21.05   |
| 300024 | 2017 | 1.751 | 0 | 1.236763 | 1.5295815 | 22.74724 | 0.073787 | 25.27   |
| 600167 | 2017 | -0.59 | 0 | 1.236763 | 1.5295815 | 22.70021 | 0.131876 | 48.48   |
| 597    | 2017 | 0.157 | 0 | 1.236763 | 1.5295815 | 23.08346 | 0.036129 | 21.05   |
| 600718 | 2017 | 1.987 | 0 | 1.236763 | 1.5295815 | 23.28121 | 0.098162 | 12.3772 |
| 600167 | 2017 | -0.49 | 0 | 1.236763 | 1.5295815 | 23.13348 | 0.131876 | 48.48   |
| 600715 | 2017 | 0.028 | 0 | 1.236763 | 1.5295815 | 23.07458 | 0.061056 | 20.35   |
| 300024 | 2017 | 0.667 | 0 | 1.236763 | 1.5295815 | 22.85431 | 0.073787 | 25.27   |

|        |      |       |      |          |           |          |          |         |
|--------|------|-------|------|----------|-----------|----------|----------|---------|
| 2231   | 2017 | -0.37 | 0    | 1.236763 | 1.5295815 | 20.71894 | 0.013904 | 27.95   |
| 600718 | 2017 | 2.101 | 0    | 1.236763 | 1.5295815 | 23.28121 | 0.098162 | 12.3772 |
| 300024 | 2017 | 1.411 | 0    | 1.236763 | 1.5295815 | 22.85431 | 0.073787 | 25.27   |
| 410    | 2017 | -0.1  | 0    | 1.236763 | 1.5295815 | 23.78716 | 0.106122 | 30.13   |
| 300573 | 2017 | 0.972 | 0    | 1.236763 | 1.5295815 | 20.33241 | 0.06946  | 31.71   |
| 300198 | 2017 | -0.15 | 0.03 | 1.114168 | 1.2413711 | 21.868   | 0.045982 | 25.96   |
| 2509   | 2017 | -0.52 | 0.03 | 1.114168 | 1.2413711 | 22.88843 | 0.11592  | 18.36   |
| 600493 | 2017 | 0.054 | 0.03 | 1.114168 | 1.2413711 | 20.80806 | 0.035638 | 10.72   |
| 603555 | 2017 | -0.76 | 0.03 | 1.114168 | 1.2413711 | 22.63775 | 0.071482 | 74.18   |
| 603636 | 2017 | 1.173 | 0.03 | 1.114168 | 1.2413711 | 21.3985  | 0.091355 | 56.5    |
| 2029   | 2017 | -0.54 | 0.03 | 1.114168 | 1.2413711 | 22.63523 | 0.062092 | 34.29   |
| 2098   | 2017 | -0.76 | 0.03 | 1.114168 | 1.2413711 | 21.87988 | 0.101036 | 25      |
| 600493 | 2017 | 0.054 | 0.03 | 1.114168 | 1.2413711 | 20.80806 | 0.035638 | 10.72   |
| 2578   | 2017 | -0.19 | 0.03 | 1.114168 | 1.2413711 | 21.22332 | 0.025202 | 27.86   |
| 300198 | 2017 | -0.76 | 0.03 | 1.114168 | 1.2413711 | 21.868   | 0.045982 | 25.96   |
| 300198 | 2017 | -0.09 | 0.03 | 1.114168 | 1.2413711 | 21.53055 | 0.045982 | 25.96   |
| 2098   | 2017 | -0.19 | 0.03 | 1.114168 | 1.2413711 | 21.60712 | 0.101036 | 25      |
| 2174   | 2017 | 1.786 | 0.03 | 1.114168 | 1.2413711 | 22.61577 | 0.163244 | 34.43   |
| 2029   | 2017 | -0.54 | 0.03 | 1.114168 | 1.2413711 | 22.87305 | 0.062092 | 34.29   |
| 603678 | 2017 | -0.7  | 0.03 | 1.114168 | 1.2413711 | 21.59383 | 0.089481 | 40.84   |
| 2517   | 2017 | 1.133 | 0.03 | 1.114168 | 1.2413711 | 22.53231 | 0.302158 | 21.44   |
| 2509   | 2017 | -0.73 | 0.03 | 1.114168 | 1.2413711 | 22.88843 | 0.11592  | 18.36   |
| 2174   | 2017 | 1.918 | 0.03 | 1.114168 | 1.2413711 | 22.69008 | 0.163244 | 34.43   |
| 603678 | 2017 | -0.7  | 0.03 | 1.114168 | 1.2413711 | 21.92126 | 0.089481 | 40.84   |
| 2509   | 2017 | -0.73 | 0.03 | 1.114168 | 1.2413711 | 22.88843 | 0.11592  | 18.36   |
| 2509   | 2017 | -0.73 | 0.03 | 1.114168 | 1.2413711 | 22.88843 | 0.11592  | 18.36   |
| 603636 | 2017 | 1.173 | 0.03 | 1.114168 | 1.2413711 | 21.34786 | 0.091355 | 56.5    |
| 2674   | 2017 | 0.605 | 0.03 | 1.114168 | 1.2413711 | 21.69713 | 0.019201 | 28.04   |
| 603636 | 2017 | 1.173 | 0.03 | 1.114168 | 1.2413711 | 21.3985  | 0.091355 | 56.5    |
| 2174   | 2017 | 1.786 | 0.03 | 1.114168 | 1.2413711 | 22.61577 | 0.163244 | 34.43   |
| 600573 | 2017 | -0.47 | 0.03 | 1.114168 | 1.2413711 | 20.91533 | 0.02113  | 50.08   |
| 2509   | 2017 | -0.53 | 0.03 | 1.114168 | 1.2413711 | 22.88843 | 0.11592  | 18.36   |
| 603636 | 2017 | 1.173 | 0.03 | 1.114168 | 1.2413711 | 21.34786 | 0.091355 | 56.5    |
| 300198 | 2017 | -0.76 | 0.03 | 1.114168 | 1.2413711 | 21.868   | 0.045982 | 25.96   |
| 2509   | 2017 | -0.29 | 0.03 | 1.114168 | 1.2413711 | 22.88843 | 0.11592  | 18.36   |
| 2098   | 2017 | -0.76 | 0.03 | 1.114168 | 1.2413711 | 21.87988 | 0.101036 | 25      |
| 2517   | 2017 | 1.133 | 0.03 | 1.114168 | 1.2413711 | 22.53231 | 0.302158 | 21.44   |
| 2509   | 2017 | -0.73 | 0.03 | 1.114168 | 1.2413711 | 22.88843 | 0.11592  | 18.36   |
| 300198 | 2017 | -0.09 | 0.03 | 1.114168 | 1.2413711 | 21.868   | 0.045982 | 25.96   |
| 603636 | 2017 | 1.173 | 0.03 | 1.114168 | 1.2413711 | 21.3985  | 0.091355 | 56.5    |
| 603555 | 2017 | -0.76 | 0.03 | 1.114168 | 1.2413711 | 22.74912 | 0.071482 | 74.18   |
| 2517   | 2017 | 1.133 | 0.03 | 1.114168 | 1.2413711 | 22.84061 | 0.302158 | 21.44   |
| 2509   | 2017 | -0.73 | 0.03 | 1.114168 | 1.2413711 | 22.3735  | 0.11592  | 18.36   |
| 2509   | 2017 | -0.52 | 0.03 | 1.114168 | 1.2413711 | 22.88843 | 0.11592  | 18.36   |
| 2517   | 2017 | 1.133 | 0.03 | 1.114168 | 1.2413711 | 22.53231 | 0.302158 | 21.44   |
| 2578   | 2017 | -0.19 | 0.03 | 1.114168 | 1.2413711 | 21.25396 | 0.025202 | 27.86   |
| 2509   | 2017 | -0.73 | 0.03 | 1.114168 | 1.2413711 | 22.88843 | 0.11592  | 18.36   |
| 600493 | 2017 | 0.054 | 0.03 | 1.114168 | 1.2413711 | 20.68563 | 0.035638 | 10.72   |
| 603678 | 2017 | -0.7  | 0.03 | 1.114168 | 1.2413711 | 21.92126 | 0.089481 | 40.84   |
| 2509   | 2017 | -0.73 | 0.03 | 1.114168 | 1.2413711 | 22.88843 | 0.11592  | 18.36   |
| 603678 | 2017 | -0.7  | 0.03 | 1.114168 | 1.2413711 | 21.92126 | 0.089481 | 40.84   |
| 2674   | 2017 | 0.605 | 0.03 | 1.114168 | 1.2413711 | 21.69121 | 0.019201 | 28.04   |
| 2674   | 2017 | 0.605 | 0.03 | 1.114168 | 1.2413711 | 21.69713 | 0.019201 | 28.04   |
| 2174   | 2017 | 1.476 | 0.03 | 1.114168 | 1.2413711 | 22.61577 | 0.163244 | 34.43   |

|        |      |       |      |          |            |          |          |       |
|--------|------|-------|------|----------|------------|----------|----------|-------|
| 2174   | 2017 | 1.918 | 0.03 | 1.114168 | 1.2413711  | 22.61577 | 0.163244 | 34.43 |
| 2674   | 2017 | 0.605 | 0.03 | 1.114168 | 1.2413711  | 21.69713 | 0.019201 | 28.04 |
| 2674   | 2017 | 0.605 | 0.03 | 1.114168 | 1.2413711  | 21.69713 | 0.019201 | 28.04 |
| 2174   | 2017 | 1.918 | 0.03 | 1.114168 | 1.2413711  | 22.61577 | 0.163244 | 34.43 |
| 600573 | 2017 | -0.47 | 0.03 | 1.114168 | 1.2413711  | 20.94399 | 0.02113  | 50.08 |
| 2509   | 2017 | -0.73 | 0.03 | 1.114168 | 1.2413711  | 22.88843 | 0.11592  | 18.36 |
| 600573 | 2017 | -0.5  | 0.03 | 1.114168 | 1.2413711  | 20.91533 | 0.02113  | 50.08 |
| 603678 | 2017 | -0.7  | 0.03 | 1.114168 | 1.2413711  | 21.92126 | 0.089481 | 40.84 |
| 603636 | 2017 | 1.173 | 0.03 | 1.114168 | 1.2413711  | 21.3985  | 0.091355 | 56.5  |
| 2174   | 2017 | 1.808 | 0.03 | 1.114168 | 1.2413711  | 22.61577 | 0.163244 | 34.43 |
| 603555 | 2017 | -0.76 | 0.03 | 1.114168 | 1.2413711  | 22.74912 | 0.071482 | 74.18 |
| 2098   | 2017 | -0.76 | 0.03 | 1.114168 | 1.2413711  | 21.87988 | 0.101036 | 25    |
| 600573 | 2017 | -0.77 | 0.03 | 1.114168 | 1.2413711  | 20.91533 | 0.02113  | 50.08 |
| 2674   | 2017 | 0.605 | 0.03 | 1.114168 | 1.2413711  | 21.69713 | 0.019201 | 28.04 |
| 2509   | 2017 | -0.73 | 0.03 | 1.114168 | 1.2413711  | 22.88843 | 0.11592  | 18.36 |
| 2098   | 2017 | -0.76 | 0.03 | 1.114168 | 1.2413711  | 21.87988 | 0.101036 | 25    |
| 2029   | 2017 | -0.54 | 0.03 | 1.114168 | 1.2413711  | 22.63523 | 0.062092 | 34.29 |
| 2098   | 2017 | -0.01 | 0.03 | 1.114168 | 1.2413711  | 21.87988 | 0.101036 | 25    |
| 600573 | 2017 | -0.77 | 0.03 | 1.114168 | 1.2413711  | 20.91533 | 0.02113  | 50.08 |
| 300198 | 2017 | -0.15 | 0.03 | 1.114168 | 1.2413711  | 21.868   | 0.045982 | 25.96 |
| 2578   | 2017 | -0.19 | 0.03 | 1.114168 | 1.2413711  | 21.25396 | 0.025202 | 27.86 |
| 2098   | 2017 | -0.01 | 0.03 | 1.114168 | 1.2413711  | 21.87988 | 0.101036 | 25    |
| 2517   | 2017 | 1.133 | 0.03 | 1.114168 | 1.2413711  | 22.53231 | 0.302158 | 21.44 |
| 600756 | 2017 | 2.261 | 0.01 | 0.510826 | 0.26094302 | 21.78601 | 0.057212 | 19.09 |
| 600756 | 2017 | 2.261 | 0.01 | 0.510826 | 0.26094302 | 21.81892 | 0.057212 | 19.09 |
| 600756 | 2017 | 2.261 | 0.01 | 0.510826 | 0.26094302 | 21.78601 | 0.057212 | 19.09 |
| 300099 | 2017 | 0.49  | 0.01 | 0.510826 | 0.26094302 | 21.37699 | 0.061197 | 30.44 |
| 300099 | 2017 | -0.17 | 0.01 | 0.510826 | 0.26094302 | 21.37699 | 0.061197 | 30.44 |
| 300099 | 2017 | -0.17 | 0.01 | 0.510826 | 0.26094302 | 21.37699 | 0.061197 | 30.44 |
| 600756 | 2017 | 2.261 | 0.01 | 0.510826 | 0.26094302 | 21.78601 | 0.057212 | 19.09 |
| 600756 | 2017 | 2.261 | 0.01 | 0.510826 | 0.26094302 | 21.78601 | 0.057212 | 19.09 |
| 300099 | 2017 | 1.152 | 0.01 | 0.510826 | 0.26094302 | 21.37699 | 0.061197 | 30.44 |
| 300099 | 2017 | -0.17 | 0.01 | 0.510826 | 0.26094302 | 21.37699 | 0.061197 | 30.44 |
| 300099 | 2017 | 1.152 | 0.01 | 0.510826 | 0.26094302 | 21.23912 | 0.061197 | 30.44 |
| 300099 | 2017 | -0.17 | 0.01 | 0.510826 | 0.26094302 | 21.37699 | 0.061197 | 30.44 |
| 600756 | 2017 | 2.261 | 0.01 | 0.510826 | 0.26094302 | 21.78601 | 0.057212 | 19.09 |
| 600756 | 2017 | 2.261 | 0.01 | 0.510826 | 0.26094302 | 21.78601 | 0.057212 | 19.09 |
| 601890 | 2017 | 0.213 | 0.02 | 1.493566 | 2.2307384  | 22.05973 | 0.009008 | 27.7  |
| 601890 | 2017 | -0.23 | 0.02 | 1.493566 | 2.2307384  | 22.05973 | 0.009008 | 27.7  |
| 600854 | 2017 | -0.5  | 0.02 | 1.493566 | 2.2307384  | 21.64003 | -0.01635 | 25.34 |
| 300258 | 2017 | 0.024 | 0.02 | 1.493566 | 2.2307384  | 21.5949  | 0.150181 | 45.8  |
| 300258 | 2017 | 0.192 | 0.02 | 1.493566 | 2.2307384  | 21.5949  | 0.150181 | 45.8  |
| 600854 | 2017 | 0.361 | 0.02 | 1.493566 | 2.2307384  | 21.64003 | -0.01635 | 25.34 |
| 601890 | 2017 | 0.213 | 0.02 | 1.493566 | 2.2307384  | 22.05973 | 0.009008 | 27.7  |
| 300258 | 2017 | 0.277 | 0.02 | 1.493566 | 2.2307384  | 21.5949  | 0.150181 | 45.8  |
| 300258 | 2017 | 0.188 | 0.02 | 1.493566 | 2.2307384  | 21.40531 | 0.150181 | 45.8  |
| 600099 | 2017 | -0.7  | 0.02 | 1.493566 | 2.2307384  | 20.136   | 0.004095 | 42.1  |
| 600099 | 2017 | -0.7  | 0.02 | 1.493566 | 2.2307384  | 20.136   | 0.004095 | 42.1  |
| 300354 | 2017 | 0.662 | 0.02 | 1.493566 | 2.2307384  | 20.10336 | 0.013131 | 52.35 |
| 600854 | 2017 | -0.46 | 0.02 | 1.493566 | 2.2307384  | 21.64003 | -0.01635 | 25.34 |
| 300258 | 2017 | 0.113 | 0.02 | 1.493566 | 2.2307384  | 21.5949  | 0.150181 | 45.8  |
| 600099 | 2017 | -0.7  | 0.02 | 1.493566 | 2.2307384  | 20.10336 | 0.004095 | 42.1  |
| 601890 | 2017 | 0.213 | 0.02 | 1.493566 | 2.2307384  | 22.05973 | 0.009008 | 27.7  |
| 300354 | 2017 | 0.662 | 0.02 | 1.493566 | 2.2307384  | 20.10336 | 0.013131 | 52.35 |

|        |      |       |      |          |            |          |          |       |
|--------|------|-------|------|----------|------------|----------|----------|-------|
| 600854 | 2017 | -0.46 | 0.02 | 1.493566 | 2.2307384  | 21.64003 | -0.01635 | 25.34 |
| 300354 | 2017 | 0.662 | 0.02 | 1.493566 | 2.2307384  | 20.10336 | 0.013131 | 52.35 |
| 600854 | 2017 | -0.46 | 0.02 | 1.493566 | 2.2307384  | 21.7358  | -0.01635 | 25.34 |
| 600854 | 2017 | -0.46 | 0.02 | 1.493566 | 2.2307384  | 21.64003 | -0.01635 | 25.34 |
| 601890 | 2017 | 0.213 | 0.02 | 1.493566 | 2.2307384  | 22.05219 | 0.009008 | 27.7  |
| 300354 | 2017 | 0.662 | 0.02 | 1.493566 | 2.2307384  | 20.10336 | 0.013131 | 52.35 |
| 600099 | 2017 | -0.7  | 0.02 | 1.493566 | 2.2307384  | 20.136   | 0.004095 | 42.1  |
| 300354 | 2017 | 0.662 | 0.02 | 1.493566 | 2.2307384  | 20.10336 | 0.013131 | 52.35 |
| 600854 | 2017 | -0.46 | 0.02 | 1.493566 | 2.2307384  | 21.64003 | -0.01635 | 25.34 |
| 300258 | 2017 | 0.277 | 0.02 | 1.493566 | 2.2307384  | 21.5949  | 0.150181 | 45.8  |
| 600854 | 2017 | -0.46 | 0.02 | 1.493566 | 2.2307384  | 21.64003 | -0.01635 | 25.34 |
| 300354 | 2017 | 0.662 | 0.02 | 1.493566 | 2.2307384  | 20.10336 | 0.013131 | 52.35 |
| 600854 | 2017 | -0.46 | 0.02 | 1.493566 | 2.2307384  | 21.64003 | -0.01635 | 25.34 |
| 601890 | 2017 | 0.166 | 0.02 | 1.493566 | 2.2307384  | 22.05973 | 0.009008 | 27.7  |
| 601890 | 2017 | -0.23 | 0.02 | 1.493566 | 2.2307384  | 22.05973 | 0.009008 | 27.7  |
| 600099 | 2017 | -0.7  | 0.02 | 1.493566 | 2.2307384  | 20.136   | 0.004095 | 42.1  |
| 568    | 2017 | -0.66 | 0.01 | 0.146081 | 0.02133968 | 23.51243 | 0.169927 | 26.02 |
| 568    | 2017 | 0.114 | 0.01 | 0.146081 | 0.02133968 | 23.70671 | 0.169927 | 26.02 |
| 2246   | 2017 | 0.29  | 0.01 | 0.146081 | 0.02133968 | 21.97055 | 0.043789 | 18.06 |
| 2246   | 2017 | 0.687 | 0.01 | 0.146081 | 0.02133968 | 21.97055 | 0.043789 | 18.06 |
| 2246   | 2017 | 0.687 | 0.01 | 0.146081 | 0.02133968 | 21.97055 | 0.043789 | 18.06 |
| 568    | 2017 | -0.26 | 0.01 | 0.146081 | 0.02133968 | 23.70671 | 0.169927 | 26.02 |
| 2246   | 2017 | 0.321 | 0.01 | 0.146081 | 0.02133968 | 21.55978 | 0.043789 | 18.06 |
| 568    | 2017 | -0.66 | 0.01 | 0.146081 | 0.02133968 | 23.70671 | 0.169927 | 26.02 |
| 2246   | 2017 | 0.454 | 0.01 | 0.146081 | 0.02133968 | 21.97055 | 0.043789 | 18.06 |
| 568    | 2017 | 0.196 | 0.01 | 0.146081 | 0.02133968 | 23.70671 | 0.169927 | 26.02 |
| 2246   | 2017 | -0.14 | 0.01 | 0.146081 | 0.02133968 | 21.97055 | 0.043789 | 18.06 |
| 2246   | 2017 | 0.687 | 0.01 | 0.146081 | 0.02133968 | 21.97055 | 0.043789 | 18.06 |
| 568    | 2017 | -0.39 | 0.01 | 0.146081 | 0.02133968 | 23.51243 | 0.169927 | 26.02 |
| 601608 | 2017 | 0.187 | 0.02 | 0.923891 | 0.85357527 | 23.70584 | 0.009023 | 60.49 |
| 2046   | 2017 | 0.613 | 0.02 | 0.923891 | 0.85357527 | 22.04248 | 0.019415 | 56.67 |
| 601038 | 2017 | -0.21 | 0.02 | 0.923891 | 0.85357527 | 23.36964 | 0.006934 | 41.66 |
| 603566 | 2017 | 0.099 | 0.02 | 0.923891 | 0.85357527 | 21.31389 | 0.072784 | 33.24 |
| 2560   | 2017 | -0.62 | 0.02 | 0.923891 | 0.85357527 | 21.54396 | 0.008433 | 24.16 |
| 2046   | 2017 | 0.708 | 0.02 | 0.923891 | 0.85357527 | 22.04248 | 0.019415 | 56.67 |
| 600876 | 2017 | -0.16 | 0.02 | 0.923891 | 0.85357527 | 21.04036 | 0.036785 | 47.21 |
| 300263 | 2017 | -0.15 | 0.02 | 0.923891 | 0.85357527 | 22.0193  | 0.021673 | 20.34 |
| 300263 | 2017 | 0.035 | 0.02 | 0.923891 | 0.85357527 | 22.0193  | 0.021673 | 20.34 |
| 601608 | 2017 | 0.441 | 0.02 | 0.923891 | 0.85357527 | 23.6708  | 0.009023 | 60.49 |
| 2179   | 2017 | 0.614 | 0.02 | 0.923891 | 0.85357527 | 23.02887 | 0.159606 | 41.17 |
| 2613   | 2017 | 0.029 | 0.02 | 0.923891 | 0.85357527 | 21.47591 | -0.02844 | 54.23 |
| 2179   | 2017 | 0.67  | 0.02 | 0.923891 | 0.85357527 | 23.02887 | 0.159606 | 41.17 |
| 601608 | 2017 | 1.103 | 0.02 | 0.923891 | 0.85357527 | 23.70584 | 0.009023 | 60.49 |
| 601038 | 2017 | -0.18 | 0.02 | 0.923891 | 0.85357527 | 23.22437 | 0.006934 | 41.66 |
| 300263 | 2017 | -0.38 | 0.02 | 0.923891 | 8.54E-01   | 22.0193  | 0.021673 | 20.34 |
| 2046   | 2017 | 1.276 | 0.02 | 0.923891 | 8.54E-01   | 22.04248 | 0.019415 | 56.67 |
| 601608 | 2017 | 0.441 | 0.02 | 0.923891 | 8.54E-01   | 23.70584 | 0.009023 | 60.49 |
| 2046   | 2017 | 1.276 | 0.02 | 0.923891 | 8.54E-01   | 22.04248 | 0.019415 | 56.67 |
| 2046   | 2017 | 0.956 | 0.02 | 0.923891 | 8.54E-01   | 22.04248 | 0.019415 | 56.67 |
| 2560   | 2017 | -0.62 | 0.02 | 0.923891 | 8.54E-01   | 21.62581 | 0.008433 | 24.16 |
| 603566 | 2017 | 0.099 | 0.02 | 0.923891 | 8.54E-01   | 21.31389 | 0.072784 | 33.24 |
| 300263 | 2017 | -0.15 | 0.02 | 0.923891 | 8.54E-01   | 22.0193  | 0.021673 | 20.34 |
| 2179   | 2017 | 0.305 | 0.02 | 0.923891 | 8.54E-01   | 23.02887 | 0.159606 | 41.17 |
| 2613   | 2017 | -0.5  | 0.02 | 0.923891 | 8.54E-01   | 21.47591 | -0.02844 | 54.23 |

|        |      |       |      |          |            |          |          |       |
|--------|------|-------|------|----------|------------|----------|----------|-------|
| 2046   | 2017 | 0.708 | 0.02 | 0.923891 | 0.85357527 | 21.66436 | 0.019415 | 56.67 |
| 2046   | 2017 | 1.276 | 0.02 | 0.923891 | 0.85357527 | 22.04248 | 0.019415 | 56.67 |
| 601608 | 2017 | 0.441 | 0.02 | 0.923891 | 0.85357527 | 23.70584 | 0.009023 | 60.49 |
| 603993 | 2017 | -0.75 | 0.02 | 0.923891 | 0.85357527 | 25.30657 | 0.07832  | 24.69 |
| 603993 | 2017 | -0.42 | 0.02 | 0.923891 | 0.85357527 | 25.30657 | 0.07832  | 24.69 |
| 300263 | 2017 | -0.01 | 0.02 | 0.923891 | 0.85357527 | 22.0193  | 0.021673 | 20.34 |
| 300263 | 2017 | 0.044 | 0.02 | 0.923891 | 0.85357527 | 22.0193  | 0.021673 | 20.34 |
| 2179   | 2017 | 0.67  | 0.02 | 0.923891 | 0.85357527 | 23.02887 | 0.159606 | 41.17 |
| 2179   | 2017 | 0.565 | 0.02 | 0.923891 | 0.85357527 | 23.02887 | 0.159606 | 41.17 |
| 2046   | 2017 | 1.03  | 0.02 | 0.923891 | 0.85357527 | 22.04248 | 0.019415 | 56.67 |
| 603993 | 2017 | -0.75 | 0.02 | 0.923891 | 0.85357527 | 25.30657 | 0.07832  | 24.69 |
| 2613   | 2017 | 0.093 | 0.02 | 0.923891 | 0.85357527 | 21.47591 | -0.02844 | 54.23 |
| 601608 | 2017 | 0.441 | 0.02 | 0.923891 | 0.85357527 | 23.70584 | 0.009023 | 60.49 |
| 603566 | 2017 | 0.099 | 0.02 | 0.923891 | 0.85357527 | 21.27545 | 0.072784 | 33.24 |
| 603566 | 2017 | 1.194 | 0.02 | 0.923891 | 0.85357527 | 21.31389 | 0.072784 | 33.24 |
| 600876 | 2017 | -0.16 | 0.02 | 0.923891 | 0.85357527 | 20.97516 | 0.036785 | 47.21 |
| 601608 | 2017 | -0.22 | 0.02 | 0.923891 | 0.85357527 | 23.70584 | 0.009023 | 60.49 |
| 2179   | 2017 | 0.171 | 0.02 | 0.923891 | 0.85357527 | 23.02887 | 0.159606 | 41.17 |
| 601038 | 2017 | -0.3  | 0.02 | 0.923891 | 0.85357527 | 23.36964 | 0.006934 | 41.66 |
| 601608 | 2017 | 0.336 | 0.02 | 0.923891 | 0.85357527 | 23.70584 | 0.009023 | 60.49 |
| 601608 | 2017 | 0.237 | 0.02 | 0.923891 | 0.85357527 | 23.70584 | 0.009023 | 60.49 |
| 603993 | 2017 | -0.09 | 0.02 | 0.923891 | 0.85357527 | 25.30657 | 0.07832  | 24.69 |
| 300263 | 2017 | -0.15 | 0.02 | 0.923891 | 0.85357527 | 22.0193  | 0.021673 | 20.34 |
| 300263 | 2017 | -0.01 | 0.02 | 0.923891 | 0.85357527 | 22.02235 | 0.021673 | 20.34 |
| 2613   | 2017 | 0.162 | 0.02 | 0.923891 | 0.85357527 | 21.47591 | -0.02844 | 54.23 |
| 2179   | 2017 | -0.06 | 0.02 | 0.923891 | 0.85357527 | 22.81883 | 0.159606 | 41.17 |
| 601038 | 2017 | -0.18 | 0.02 | 0.923891 | 0.85357527 | 23.36964 | 0.006934 | 41.66 |
| 603993 | 2017 | -0.75 | 0.02 | 0.923891 | 0.85357527 | 25.30657 | 0.07832  | 24.69 |
| 603566 | 2017 | 0.099 | 0.02 | 0.923891 | 0.85357527 | 21.31389 | 0.072784 | 33.24 |
| 603993 | 2017 | -0.09 | 0.02 | 0.923891 | 0.85357527 | 25.30657 | 0.07832  | 24.69 |
| 300263 | 2017 | -0.15 | 0.02 | 0.923891 | 0.85357527 | 22.0193  | 0.021673 | 20.34 |
| 300263 | 2017 | 0.077 | 0.02 | 0.923891 | 0.85357527 | 22.0193  | 0.021673 | 20.34 |
| 2046   | 2017 | 0.916 | 0.02 | 0.923891 | 0.85357527 | 22.04248 | 0.019415 | 56.67 |
| 603993 | 2017 | -0.75 | 0.02 | 0.923891 | 0.85357527 | 25.30657 | 0.07832  | 24.69 |
| 2560   | 2017 | -0.62 | 0.02 | 0.923891 | 0.85357527 | 21.62581 | 0.008433 | 24.16 |
| 600876 | 2017 | -0.16 | 0.02 | 0.923891 | 0.85357527 | 21.04036 | 0.036785 | 47.21 |
| 603993 | 2017 | -0.75 | 0.02 | 0.923891 | 0.85357527 | 25.30657 | 0.07832  | 24.69 |
| 2613   | 2017 | -0.17 | 0.02 | 0.923891 | 0.85357527 | 21.47591 | -0.02844 | 54.23 |
| 603566 | 2017 | 0.099 | 0.02 | 0.923891 | 0.85357527 | 21.31389 | 0.072784 | 33.24 |
| 2179   | 2017 | -0.26 | 0.02 | 0.923891 | 0.85357527 | 23.02887 | 0.159606 | 41.17 |
| 601038 | 2017 | -0.15 | 0.02 | 0.923891 | 0.85357527 | 23.36964 | 0.006934 | 41.66 |
| 2613   | 2017 | -0.17 | 0.02 | 0.923891 | 0.85357527 | 21.47591 | -0.02844 | 54.23 |
| 2613   | 2017 | 0.382 | 0.02 | 0.923891 | 0.85357527 | 21.47591 | -0.02844 | 54.23 |
| 601038 | 2017 | -0.49 | 0.02 | 0.923891 | 0.85357527 | 23.36964 | 0.006934 | 41.66 |
| 603993 | 2017 | -0.75 | 0.02 | 0.923891 | 0.85357527 | 25.30657 | 0.07832  | 24.69 |
| 601608 | 2017 | 0.441 | 0.02 | 0.923891 | 0.85357527 | 23.70584 | 0.009023 | 60.49 |
| 600876 | 2017 | -0.16 | 0.02 | 0.923891 | 0.85357527 | 21.04036 | 0.036785 | 47.21 |
| 2613   | 2017 | 0.162 | 0.02 | 0.923891 | 0.85357527 | 21.47591 | -0.02844 | 54.23 |
| 2046   | 2017 | 0.945 | 0.02 | 0.923891 | 0.85357527 | 22.04248 | 0.019415 | 56.67 |
| 2179   | 2017 | 0.396 | 0.02 | 0.923891 | 0.85357527 | 23.02887 | 0.159606 | 41.17 |
| 2613   | 2017 | 0.213 | 0.02 | 0.923891 | 0.85357527 | 21.47591 | -0.02844 | 54.23 |
| 300263 | 2017 | -0.38 | 0.02 | 0.923891 | 0.85357527 | 22.0193  | 0.021673 | 20.34 |
| 601038 | 2017 | -0.49 | 0.02 | 0.923891 | 0.85357527 | 23.36964 | 0.006934 | 41.66 |
| 2179   | 2017 | 0.614 | 0.02 | 0.923891 | 0.85357527 | 23.02887 | 0.159606 | 41.17 |

|        |      |       |      |          |            |          |          |       |
|--------|------|-------|------|----------|------------|----------|----------|-------|
| 300263 | 2017 | -0.01 | 0.02 | 0.923891 | 0.85357527 | 22.0193  | 0.021673 | 20.34 |
| 603993 | 2017 | -0.75 | 0.02 | 0.923891 | 0.85357527 | 24.56635 | 0.07832  | 24.69 |
| 601038 | 2017 | -0.49 | 0.02 | 0.923891 | 0.85357527 | 23.36964 | 0.006934 | 41.66 |
| 2179   | 2017 | 0.021 | 0.02 | 0.923891 | 0.85357527 | 23.02887 | 0.159606 | 41.17 |
| 2613   | 2017 | 0.009 | 0.02 | 0.923891 | 0.85357527 | 21.47591 | -0.02844 | 54.23 |
| 2613   | 2017 | 0.062 | 0.02 | 0.923891 | 0.85357527 | 21.10605 | -0.02844 | 54.23 |
| 2179   | 2017 | 0.19  | 0.02 | 0.923891 | 0.85357527 | 23.02887 | 0.159606 | 41.17 |
| 2560   | 2017 | -0.62 | 0.02 | 0.923891 | 0.85357527 | 21.62581 | 0.008433 | 24.16 |
| 600876 | 2017 | -0.16 | 0.02 | 0.923891 | 0.85357527 | 21.04036 | 0.036785 | 47.21 |
| 603566 | 2017 | 1.194 | 0.02 | 0.923891 | 0.85357527 | 21.31389 | 0.072784 | 33.24 |
| 601608 | 2017 | -0.22 | 0.02 | 0.923891 | 0.85357527 | 23.70584 | 0.009023 | 60.49 |
| 2179   | 2017 | 0.19  | 0.02 | 0.923891 | 0.85357527 | 23.02887 | 0.159606 | 41.17 |
| 603566 | 2017 | -0.01 | 0.02 | 0.923891 | 0.85357527 | 21.31389 | 0.072784 | 33.24 |
| 2179   | 2017 | 0.267 | 0.02 | 0.923891 | 0.85357527 | 23.02887 | 0.159606 | 41.17 |
| 603566 | 2017 | -0.01 | 0.02 | 0.923891 | 0.85357527 | 21.31389 | 0.072784 | 33.24 |
| 601038 | 2017 | -0.3  | 0.02 | 0.923891 | 0.85357527 | 23.36964 | 0.006934 | 41.66 |
| 601608 | 2017 | 0.441 | 0.02 | 0.923891 | 0.85357527 | 23.70584 | 0.009023 | 60.49 |
| 2560   | 2017 | -0.62 | 0.02 | 0.923891 | 0.85357527 | 21.62581 | 0.008433 | 24.16 |
| 601038 | 2017 | -0.49 | 0.02 | 0.923891 | 0.85357527 | 23.36964 | 0.006934 | 41.66 |
| 300263 | 2017 | -0.15 | 0.02 | 0.923891 | 0.85357527 | 22.0193  | 0.021673 | 20.34 |
| 600547 | 2017 | -0.04 | 0.01 | 1.307547 | 1.7096794  | 24.4637  | 0.069507 | 44.8  |
| 600547 | 2017 | -0.04 | 0.01 | 1.307547 | 1.7096794  | 24.4637  | 0.069507 | 44.8  |
| 300479 | 2017 | 1.309 | 0.01 | 1.307547 | 1.7096794  | 20.15541 | 0.069472 | 45    |
| 600898 | 2017 | -0.03 | 0.01 | 1.307547 | 1.7096794  | 21.84783 | 0.000317 | 15.84 |
| 603029 | 2017 | 0.49  | 0.01 | 1.307547 | 1.7096794  | 20.65911 | 0.015793 | 60.87 |
| 2242   | 2017 | -0.12 | 0.01 | 1.307547 | 1.7096794  | 22.4005  | 0.198176 | 48.21 |
| 600350 | 2017 | -0.58 | 0.01 | 1.307547 | 1.7096794  | 24.65193 | 0.106276 | 59.67 |
| 600547 | 2017 | -0.59 | 0.01 | 1.307547 | 1.7096794  | 24.4637  | 0.069507 | 44.8  |
| 603029 | 2017 | 0.49  | 0.01 | 1.307547 | 1.7096794  | 20.65911 | 0.015793 | 60.87 |
| 2270   | 2017 | -0.14 | 0.01 | 1.307547 | 1.7096794  | 21.87787 | 0.139951 | 33.34 |
| 300443 | 2017 | -0.58 | 0.01 | 1.307547 | 1.7096794  | 21.27553 | 0.092701 | 43.13 |
| 2242   | 2017 | -0.47 | 0.01 | 1.307547 | 1.7096794  | 22.4005  | 0.198176 | 48.21 |
| 300443 | 2017 | -0.58 | 0.01 | 1.307547 | 1.7096794  | 21.27525 | 0.092701 | 43.13 |
| 600350 | 2017 | -0.06 | 0.01 | 1.307547 | 1.7096794  | 24.65193 | 0.106276 | 59.67 |
| 600350 | 2017 | -0.06 | 0.01 | 1.307547 | 1.7096794  | 24.65193 | 0.106276 | 59.67 |
| 600022 | 2017 | 0.156 | 0.01 | 1.307547 | 1.7096794  | 24.76639 | 0.075927 | 30.26 |
| 600547 | 2017 | -0.73 | 0.01 | 1.307547 | 1.7096794  | 24.4637  | 0.069507 | 44.8  |
| 600350 | 2017 | -0.06 | 0.01 | 1.307547 | 1.7096794  | 24.65193 | 0.106276 | 59.67 |
| 600898 | 2017 | 0.6   | 0.01 | 1.307547 | 1.7096794  | 21.07578 | 0.000317 | 15.84 |
| 300479 | 2017 | 0.402 | 0.01 | 1.307547 | 1.7096794  | 20.10336 | 0.069472 | 45    |
| 600350 | 2017 | -0.96 | 0.01 | 1.307547 | 1.7096794  | 24.65193 | 0.106276 | 59.67 |
| 600547 | 2017 | -0.67 | 0.01 | 1.307547 | 1.7096794  | 23.7189  | 0.069507 | 44.8  |
| 977    | 2017 | 0.43  | 0.01 | 1.307547 | 1.7096794  | 23.60703 | 0.058286 | 41.22 |
| 977    | 2017 | 0.43  | 0.01 | 1.307547 | 1.7096794  | 23.60703 | 0.058286 | 41.22 |
| 2242   | 2017 | -0.06 | 0.01 | 1.307547 | 1.7096794  | 22.4005  | 0.198176 | 48.21 |
| 2242   | 2017 | -0.16 | 0.01 | 1.307547 | 1.7096794  | 22.4005  | 0.198176 | 48.21 |
| 600547 | 2017 | -0.67 | 0.01 | 1.307547 | 1.7096794  | 24.4637  | 0.069507 | 44.8  |
| 2339   | 2017 | 1.075 | 0.01 | 1.307547 | 1.7096794  | 22.00462 | 0.051234 | 7.84  |
| 600022 | 2017 | -0.26 | 0.01 | 1.307547 | 1.7096794  | 24.76639 | 0.075927 | 30.26 |
| 2242   | 2017 | 0.12  | 0.01 | 1.307547 | 1.7096794  | 22.4005  | 0.198176 | 48.21 |
| 2117   | 2017 | 0.033 | 0.01 | 1.307547 | 1.7096794  | 21.52832 | 0.152044 | 12.34 |
| 2339   | 2017 | 0.044 | 0.01 | 1.307547 | 1.7096794  | 22.00462 | 0.051234 | 7.84  |
| 977    | 2017 | 0.539 | 0.01 | 1.307547 | 1.7096794  | 23.60703 | 0.058286 | 41.22 |
| 600022 | 2017 | 0.279 | 0.01 | 1.307547 | 1.7096794  | 24.76639 | 0.075927 | 30.26 |

|        |      |       |      |          |           |          |          |       |
|--------|------|-------|------|----------|-----------|----------|----------|-------|
| 600350 | 2017 | -0.77 | 0.01 | 1.307547 | 1.7096794 | 24.61884 | 0.106276 | 59.67 |
| 2242   | 2017 | 0.193 | 0.01 | 1.307547 | 1.7096794 | 22.4005  | 0.198176 | 48.21 |
| 300479 | 2017 | 0.402 | 0.01 | 1.307547 | 1.7096794 | 20.15541 | 0.069472 | 45    |
| 600350 | 2017 | -0.55 | 0.01 | 1.307547 | 1.7096794 | 24.65193 | 0.106276 | 59.67 |
| 600898 | 2017 | 0.533 | 0.01 | 1.307547 | 1.7096794 | 21.84783 | 0.000317 | 15.84 |
| 2117   | 2017 | 0.317 | 0.01 | 1.307547 | 1.7096794 | 21.52832 | 0.152044 | 12.34 |
| 498    | 2017 | -0.29 | 0.01 | 1.307547 | 1.7096794 | 22.19036 | 0.142149 | 60.66 |
| 2270   | 2017 | -0.14 | 0.01 | 1.307547 | 1.7096794 | 21.87787 | 0.139951 | 33.34 |
| 2117   | 2017 | -0.14 | 0.01 | 1.307547 | 1.7096794 | 21.52832 | 0.152044 | 12.34 |
| 2242   | 2017 | 0.12  | 0.01 | 1.307547 | 1.7096794 | 22.4005  | 0.198176 | 48.21 |
| 2117   | 2017 | -0.35 | 0.01 | 1.307547 | 1.7096794 | 21.52832 | 0.152044 | 12.34 |
| 977    | 2017 | 1.19  | 0.01 | 1.307547 | 1.7096794 | 23.60703 | 0.058286 | 41.22 |
| 600547 | 2017 | -0.92 | 0.01 | 1.307547 | 1.7096794 | 24.4637  | 0.069507 | 44.8  |
| 600022 | 2017 | -0.98 | 0.01 | 1.307547 | 1.7096794 | 24.24211 | 0.075927 | 30.26 |
| 603029 | 2017 | 0.49  | 0.01 | 1.307547 | 1.7096794 | 20.65911 | 0.015793 | 60.87 |
| 2117   | 2017 | 0.979 | 0.01 | 1.307547 | 1.7096794 | 21.52832 | 0.152044 | 12.34 |
| 603029 | 2017 | 0.49  | 0.01 | 1.307547 | 1.7096794 | 20.64083 | 0.015793 | 60.87 |
| 2117   | 2017 | -0.35 | 0.01 | 1.307547 | 1.7096794 | 21.52832 | 0.152044 | 12.34 |
| 2598   | 2017 | -0.31 | 0.01 | 1.307547 | 1.7096794 | 20.82157 | 0.091173 | 29.81 |
| 2242   | 2017 | -0.47 | 0.01 | 1.307547 | 1.7096794 | 22.4005  | 0.198176 | 48.21 |
| 600350 | 2017 | -0.6  | 0.01 | 1.307547 | 1.7096794 | 24.65193 | 0.106276 | 59.67 |
| 600547 | 2017 | -0.69 | 0.01 | 1.307547 | 1.7096794 | 24.4637  | 0.069507 | 44.8  |
| 600022 | 2017 | -0.98 | 0.01 | 1.307547 | 1.7096794 | 24.76639 | 0.075927 | 30.26 |
| 2270   | 2017 | 0.087 | 0.01 | 1.307547 | 1.7096794 | 21.87787 | 0.139951 | 33.34 |
| 2339   | 2017 | 0.379 | 0.01 | 1.307547 | 1.7096794 | 22.00462 | 0.051234 | 7.84  |
| 2242   | 2017 | 0.12  | 0.01 | 1.307547 | 1.7096794 | 22.4005  | 0.198176 | 48.21 |
| 2242   | 2017 | 0.099 | 0.01 | 1.307547 | 1.7096794 | 21.93516 | 0.198176 | 48.21 |
| 600350 | 2017 | -0.06 | 0.01 | 1.307547 | 1.7096794 | 24.65193 | 0.106276 | 59.67 |
| 2117   | 2017 | -0.18 | 0.01 | 1.307547 | 1.7096794 | 21.52832 | 0.152044 | 12.34 |
| 498    | 2017 | 0.41  | 0.01 | 1.307547 | 1.7096794 | 22.19036 | 0.142149 | 60.66 |
| 300479 | 2017 | 1.017 | 0.01 | 1.307547 | 1.7096794 | 20.15541 | 0.069472 | 45    |
| 2117   | 2017 | -0.35 | 0.01 | 1.307547 | 1.7096794 | 21.52832 | 0.152044 | 12.34 |
| 2117   | 2017 | -0.35 | 0.01 | 1.307547 | 1.7096794 | 21.52832 | 0.152044 | 12.34 |
| 2117   | 2017 | -0.18 | 0.01 | 1.307547 | 1.7096794 | 21.43755 | 0.152044 | 12.34 |
| 2598   | 2017 | -0.36 | 0.01 | 1.307547 | 1.7096794 | 20.82157 | 0.091173 | 29.81 |
| 977    | 2017 | 1.201 | 0.01 | 1.307547 | 1.7096794 | 23.50579 | 0.058286 | 41.22 |
| 498    | 2017 | -0.27 | 0.01 | 1.307547 | 1.7096794 | 23.59269 | 0.142149 | 60.66 |
| 2270   | 2017 | -0.14 | 0.01 | 1.307547 | 1.7096794 | 21.97774 | 0.139951 | 33.34 |
| 300479 | 2017 | 1.309 | 0.01 | 1.307547 | 1.7096794 | 20.15541 | 0.069472 | 45    |
| 600022 | 2017 | -0.26 | 0.01 | 1.307547 | 1.7096794 | 24.76639 | 0.075927 | 30.26 |
| 2117   | 2017 | 0.317 | 0.01 | 1.307547 | 1.7096794 | 21.52832 | 0.152044 | 12.34 |
| 977    | 2017 | 0.43  | 0.01 | 1.307547 | 1.7096794 | 23.60703 | 0.058286 | 41.22 |
| 977    | 2017 | 0.873 | 0.01 | 1.307547 | 1.7096794 | 23.60703 | 0.058286 | 41.22 |
| 2598   | 2017 | -0.31 | 0.01 | 1.307547 | 1.7096794 | 20.82157 | 0.091173 | 29.81 |
| 977    | 2017 | 0.87  | 0.01 | 1.307547 | 1.7096794 | 23.60703 | 0.058286 | 41.22 |
| 2242   | 2017 | -0.03 | 0.01 | 1.307547 | 1.7096794 | 22.4005  | 0.198176 | 48.21 |
| 600022 | 2017 | 0.023 | 0.01 | 1.307547 | 1.7096794 | 24.76639 | 0.075927 | 30.26 |
| 2117   | 2017 | -0.18 | 0.01 | 1.307547 | 1.7096794 | 21.52832 | 0.152044 | 12.34 |
| 2242   | 2017 | 0.12  | 0.01 | 1.307547 | 1.7096794 | 22.4005  | 0.198176 | 48.21 |
| 300479 | 2017 | 0.402 | 0.01 | 1.307547 | 1.7096794 | 20.15541 | 0.069472 | 45    |
| 2117   | 2017 | -0.18 | 0.01 | 1.307547 | 1.7096794 | 21.52832 | 0.152044 | 12.34 |
| 2339   | 2017 | 0.647 | 0.01 | 1.307547 | 1.7096794 | 22.00462 | 0.051234 | 7.84  |
| 600547 | 2017 | -0.92 | 0.01 | 1.307547 | 1.7096794 | 24.4637  | 0.069507 | 44.8  |
| 2598   | 2017 | -0.28 | 0.01 | 1.307547 | 1.7096794 | 20.82157 | 0.091173 | 29.81 |



|        |      |       |      |          |            |          |          |       |
|--------|------|-------|------|----------|------------|----------|----------|-------|
| 603029 | 2017 | 0.49  | 0.01 | 1.307547 | 1.7096794  | 20.65911 | 0.015793 | 60.87 |
| 2270   | 2017 | -0.67 | 0.01 | 1.307547 | 1.7096794  | 21.87787 | 0.139951 | 33.34 |
| 2339   | 2017 | 0.457 | 0.01 | 1.307547 | 1.7096794  | 22.00462 | 0.051234 | 7.84  |
| 600898 | 2017 | 0.533 | 0.01 | 1.307547 | 1.7096794  | 21.84783 | 0.000317 | 15.84 |
| 2117   | 2017 | -0.18 | 0.01 | 1.307547 | 1.7096794  | 21.52832 | 0.152044 | 12.34 |
| 2242   | 2017 | -0.47 | 0.01 | 1.307547 | 1.7096794  | 22.4005  | 0.198176 | 48.21 |
| 2242   | 2017 | 0.12  | 0.01 | 1.307547 | 1.7096794  | 22.4005  | 0.198176 | 48.21 |
| 2242   | 2017 | -0.47 | 0.01 | 1.307547 | 1.7096794  | 22.4005  | 0.198176 | 48.21 |
| 2242   | 2017 | -0.08 | 0.01 | 1.307547 | 1.7096794  | 22.4005  | 0.198176 | 48.21 |
| 2242   | 2017 | -0.28 | 0.01 | 1.307547 | 1.7096794  | 22.4005  | 0.198176 | 48.21 |
| 2598   | 2017 | -0.28 | 0.01 | 1.307547 | 1.7096794  | 20.82157 | 0.091173 | 29.81 |
| 977    | 2017 | 0.873 | 0.01 | 1.307547 | 1.7096794  | 23.60703 | 0.058286 | 41.22 |
| 977    | 2017 | 0.873 | 0.01 | 1.307547 | 1.7096794  | 23.60703 | 0.058286 | 41.22 |
| 2339   | 2017 | -0.06 | 0.01 | 1.307547 | 1.7096794  | 22.00462 | 0.051234 | 7.84  |
| 498    | 2017 | -0.27 | 0.01 | 1.307547 | 1.7096794  | 22.19036 | 0.142149 | 60.66 |
| 603029 | 2017 | 0.49  | 0.01 | 1.307547 | 1.7096794  | 20.65911 | 0.015793 | 60.87 |
| 2598   | 2017 | -0.36 | 0.01 | 1.307547 | 1.7096794  | 20.82402 | 0.091173 | 29.81 |
| 2117   | 2017 | -0.18 | 0.01 | 1.307547 | 1.7096794  | 21.52832 | 0.152044 | 12.34 |
| 2117   | 2017 | -0.18 | 0.01 | 1.307547 | 1.7096794  | 21.52832 | 0.152044 | 12.34 |
| 2242   | 2017 | -0.07 | 0.01 | 1.307547 | 1.7096794  | 22.4005  | 0.198176 | 48.21 |
| 603029 | 2017 | 0.49  | 0.01 | 1.307547 | 1.7096794  | 20.65911 | 0.015793 | 60.87 |
| 2242   | 2017 | -0.06 | 0.01 | 1.307547 | 1.7096794  | 22.4005  | 0.198176 | 48.21 |
| 2339   | 2017 | 1.075 | 0.01 | 1.307547 | 1.7096794  | 22.00462 | 0.051234 | 7.84  |
| 2339   | 2017 | 1.179 | 0.01 | 1.307547 | 1.7096794  | 22.00462 | 0.051234 | 7.84  |
| 300443 | 2017 | -0.58 | 0.01 | 1.307547 | 1.7096794  | 21.27525 | 0.092701 | 43.13 |
| 2242   | 2017 | -0.47 | 0.01 | 1.307547 | 1.7096794  | 22.4005  | 0.198176 | 48.21 |
| 600022 | 2017 | 0.279 | 0.01 | 1.307547 | 1.7096794  | 24.76639 | 0.075927 | 30.26 |
| 2270   | 2017 | 0.087 | 0.01 | 1.307547 | 1.7096794  | 21.87787 | 0.139951 | 33.34 |
| 600547 | 2017 | -0.92 | 0.01 | 1.307547 | 1.7096794  | 24.4637  | 0.069507 | 44.8  |
| 2339   | 2017 | 0.315 | 0.01 | 1.307547 | 1.7096794  | 22.00462 | 0.051234 | 7.84  |
| 600350 | 2017 | -0.96 | 0.01 | 1.307547 | 1.7096794  | 24.65193 | 0.106276 | 59.67 |
| 498    | 2017 | -0.27 | 0.01 | 1.307547 | 1.7096794  | 22.19036 | 0.142149 | 60.66 |
| 600547 | 2017 | -0.92 | 0.01 | 1.307547 | 1.7096794  | 24.4637  | 0.069507 | 44.8  |
| 2270   | 2017 | -0.14 | 0.01 | 1.307547 | 1.7096794  | 21.87787 | 0.139951 | 33.34 |
| 2339   | 2017 | 1.179 | 0.01 | 1.307547 | 1.7096794  | 22.00462 | 0.051234 | 7.84  |
| 2339   | 2017 | 0.517 | 0.01 | 1.307547 | 1.7096794  | 21.81943 | 0.051234 | 7.84  |
| 300479 | 2017 | 0.402 | 0.01 | 1.307547 | 1.7096794  | 20.15541 | 0.069472 | 45    |
| 600022 | 2017 | -0.19 | 0.01 | 1.307547 | 1.7096794  | 24.76639 | 0.075927 | 30.26 |
| 2339   | 2017 | 0.706 | 0.01 | 1.307547 | 1.7096794  | 22.00462 | 0.051234 | 7.84  |
| 2339   | 2017 | -0.15 | 0.01 | 1.307547 | 1.7096794  | 22.00462 | 0.051234 | 7.84  |
| 300437 | 2017 | -0.19 | 0.02 | 0.693147 | 0.48045301 | 21.85074 | 0.085452 | 43.64 |
| 300437 | 2017 | 0.166 | 0.02 | 0.693147 | 0.48045301 | 21.85074 | 0.085452 | 43.64 |
| 300437 | 2017 | 0.607 | 0.02 | 0.693147 | 0.48045301 | 21.85074 | 0.085452 | 43.64 |
| 300437 | 2017 | -0.19 | 0.02 | 0.693147 | 0.48045301 | 21.37648 | 0.085452 | 43.64 |
| 300437 | 2017 | 0.418 | 0.02 | 0.693147 | 0.48045301 | 21.85074 | 0.085452 | 43.64 |
| 300437 | 2017 | 0.342 | 0.02 | 0.693147 | 0.48045301 | 21.85074 | 0.085452 | 43.64 |
| 300437 | 2017 | 0.418 | 0.02 | 0.693147 | 0.48045301 | 21.85074 | 0.085452 | 43.64 |
| 505    | 2017 | -0.99 | 0.11 | 1.013046 | 1.026263   | 22.52866 | 0.080255 | 42.06 |
| 505    | 2017 | -0.99 | 0.11 | 1.013046 | 1.026263   | 21.61939 | 0.080255 | 42.06 |
| 600238 | 2017 | -0.68 | 0.11 | 1.013046 | 1.026263   | 21.35863 | -0.13992 | 20.84 |
| 600259 | 2017 | -0.75 | 0.11 | 1.013046 | 1.026263   | 22.19372 | 0.012318 | 42.87 |
| 657    | 2017 | 0.686 | 0.11 | 1.013046 | 1.026263   | 22.72697 | 0.050513 | 60.94 |
| 2693   | 2017 | -0.36 | 0.11 | 1.013046 | 1.026263   | 21.04326 | 0.001745 | 34.45 |
| 601118 | 2017 | -0.99 | 0.11 | 1.013046 | 1.026263   | 23.31614 | -0.03474 | 69.06 |

|        |      |       |      |          |          |          |          |       |
|--------|------|-------|------|----------|----------|----------|----------|-------|
| 793    | 2017 | -0.9  | 0.11 | 1.013046 | 1.026263 | 23.48528 | 0.041717 | 8.41  |
| 572    | 2017 | 0.119 | 0.11 | 1.013046 | 1.026263 | 22.59555 | -0.17118 | 28.8  |
| 503    | 2017 | 2.49  | 0.11 | 1.013046 | 1.026263 | 21.09384 | -0.00022 | 25.74 |
| 793    | 2017 | -0.9  | 0.11 | 1.013046 | 1.026263 | 23.48528 | 0.041717 | 8.41  |
| 572    | 2017 | -0.18 | 0.11 | 1.013046 | 1.026263 | 23.48283 | -0.17118 | 28.8  |
| 300189 | 2017 | 0.715 | 0.11 | 1.013046 | 1.026263 | 21.63611 | 0.000609 | 13.92 |
| 793    | 2017 | -0.9  | 0.11 | 1.013046 | 1.026263 | 23.48528 | 0.041717 | 8.41  |
| 566    | 2017 | 0.345 | 0.11 | 1.013046 | 1.026263 | 23.07914 | 0.015994 | 27.87 |
| 600259 | 2017 | -0.75 | 0.11 | 1.013046 | 1.026263 | 22.19372 | 0.012318 | 42.87 |
| 505    | 2017 | -0.99 | 0.11 | 1.013046 | 1.026263 | 22.52866 | 0.080255 | 42.06 |
| 601118 | 2017 | -0.99 | 0.11 | 1.013046 | 1.026263 | 23.31614 | -0.03474 | 69.06 |
| 601118 | 2017 | -0.99 | 0.11 | 1.013046 | 1.026263 | 23.31614 | -0.03474 | 69.06 |
| 572    | 2017 | -0.18 | 0.11 | 1.013046 | 1.026263 | 23.48283 | -0.17118 | 28.8  |
| 657    | 2017 | -0.19 | 0.11 | 1.013046 | 1.026263 | 22.06321 | 0.050513 | 60.94 |
| 600238 | 2017 | -0.72 | 0.11 | 1.013046 | 1.026263 | 21.38013 | -0.13992 | 20.84 |
| 300086 | 2017 | -0.25 | 0.11 | 1.013046 | 1.026263 | 21.52795 | 0.025009 | 39.49 |
| 566    | 2017 | 0.586 | 0.11 | 1.013046 | 1.026263 | 23.07914 | 0.015994 | 27.87 |
| 657    | 2017 | -0.64 | 0.11 | 1.013046 | 1.026263 | 22.72697 | 0.050513 | 60.94 |
| 657    | 2017 | -0.31 | 0.11 | 1.013046 | 1.026263 | 22.72697 | 0.050513 | 60.94 |
| 600238 | 2017 | -0.72 | 0.11 | 1.013046 | 1.026263 | 21.38013 | -0.13992 | 20.84 |
| 572    | 2017 | -0.32 | 0.11 | 1.013046 | 1.026263 | 23.48283 | -0.17118 | 28.8  |
| 600238 | 2017 | -0.72 | 0.11 | 1.013046 | 1.026263 | 21.38013 | -0.13992 | 20.84 |
| 503    | 2017 | 2.49  | 0.11 | 1.013046 | 1.026263 | 20.59422 | -0.00022 | 25.74 |
| 566    | 2017 | 0.345 | 0.11 | 1.013046 | 1.026263 | 23.07914 | 0.015994 | 27.87 |
| 600259 | 2017 | -0.24 | 0.11 | 1.013046 | 1.026263 | 22.19372 | 0.012318 | 42.87 |
| 600259 | 2017 | -0.84 | 0.11 | 1.013046 | 1.026263 | 22.19372 | 0.012318 | 42.87 |
| 601118 | 2017 | -0.99 | 0.11 | 1.013046 | 1.026263 | 23.31614 | -0.03474 | 69.06 |
| 566    | 2017 | 0.321 | 0.11 | 1.013046 | 1.026263 | 23.07914 | 0.015994 | 27.87 |
| 600259 | 2017 | -0.76 | 0.11 | 1.013046 | 1.026263 | 22.19372 | 0.012318 | 42.87 |
| 600259 | 2017 | -0.56 | 0.11 | 1.013046 | 1.026263 | 22.19372 | 0.012318 | 42.87 |
| 566    | 2017 | 0.586 | 0.11 | 1.013046 | 1.026263 | 23.07914 | 0.015994 | 27.87 |
| 566    | 2017 | 0.345 | 0.11 | 1.013046 | 1.026263 | 23.07914 | 0.015994 | 27.87 |
| 600259 | 2017 | -0.67 | 0.11 | 1.013046 | 1.026263 | 21.71008 | 0.012318 | 42.87 |
| 657    | 2017 | 0.686 | 0.11 | 1.013046 | 1.026263 | 22.72697 | 0.050513 | 60.94 |
| 735    | 2017 | -0.3  | 0.11 | 1.013046 | 1.026263 | 22.54494 | 0.042312 | 17.14 |
| 566    | 2017 | 0.586 | 0.11 | 1.013046 | 1.026263 | 22.90526 | 0.015994 | 27.87 |
| 566    | 2017 | 0.345 | 0.11 | 1.013046 | 1.026263 | 23.07914 | 0.015994 | 27.87 |
| 657    | 2017 | -0.04 | 0.11 | 1.013046 | 1.026263 | 22.72697 | 0.050513 | 60.94 |
| 566    | 2017 | 0.586 | 0.11 | 1.013046 | 1.026263 | 23.07914 | 0.015994 | 27.87 |
| 572    | 2017 | -0.19 | 0.11 | 1.013046 | 1.026263 | 23.48283 | -0.17118 | 28.8  |
| 572    | 2017 | -0.32 | 0.11 | 1.013046 | 1.026263 | 23.48283 | -0.17118 | 28.8  |
| 300189 | 2017 | 0.898 | 0.11 | 1.013046 | 1.03E+00 | 21.63611 | 0.000609 | 13.92 |
| 735    | 2017 | -0.3  | 0.11 | 1.013046 | 1.03E+00 | 22.26409 | 0.042312 | 17.14 |
| 793    | 2017 | 0.343 | 0.11 | 1.013046 | 1.03E+00 | 23.48528 | 0.041717 | 8.41  |
| 300086 | 2017 | -0.25 | 0.11 | 1.013046 | 1.03E+00 | 21.4059  | 0.025009 | 39.49 |
| 2693   | 2017 | -0.36 | 0.11 | 1.013046 | 1.03E+00 | 21.04326 | 0.001745 | 34.45 |
| 600259 | 2017 | -0.88 | 0.11 | 1.013046 | 1.03E+00 | 22.19372 | 0.012318 | 42.87 |
| 2693   | 2017 | -0.36 | 0.11 | 1.013046 | 1.03E+00 | 21.04326 | 0.001745 | 34.45 |
| 572    | 2017 | -0.32 | 0.11 | 1.013046 | 1.03E+00 | 23.48283 | -0.17118 | 28.8  |
| 566    | 2017 | 0.145 | 0.11 | 1.013046 | 1.03E+00 | 23.07914 | 0.015994 | 27.87 |
| 735    | 2017 | -0.34 | 0.11 | 1.013046 | 1.03E+00 | 22.54494 | 0.042312 | 17.14 |
| 503    | 2017 | 2.49  | 0.11 | 1.013046 | 1.03E+00 | 21.09384 | -0.00022 | 25.74 |
| 505    | 2017 | -0.99 | 0.11 | 1.013046 | 1.03E+00 | 22.52866 | 0.080255 | 42.06 |
| 2693   | 2017 | -0.36 | 0.11 | 1.013046 | 1.03E+00 | 20.76299 | 0.001745 | 34.45 |

|        |      |       |      |          |           |          |          |       |
|--------|------|-------|------|----------|-----------|----------|----------|-------|
| 735    | 2017 | 0.375 | 0.11 | 1.013046 | 1.026263  | 22.54494 | 0.042312 | 17.14 |
| 601118 | 2017 | -0.99 | 0.11 | 1.013046 | 1.026263  | 23.1717  | -0.03474 | 69.06 |
| 300086 | 2017 | -0.25 | 0.11 | 1.013046 | 1.026263  | 21.52795 | 0.025009 | 39.49 |
| 2693   | 2017 | -0.36 | 0.11 | 1.013046 | 1.026263  | 21.04326 | 0.001745 | 34.45 |
| 300086 | 2017 | -0.25 | 0.11 | 1.013046 | 1.026263  | 21.52795 | 0.025009 | 39.49 |
| 793    | 2017 | -0.37 | 0.11 | 1.013046 | 1.026263  | 23.48528 | 0.041717 | 8.41  |
| 657    | 2017 | -0.39 | 0.11 | 1.013046 | 1.03E+00  | 22.72697 | 0.050513 | 60.94 |
| 300086 | 2017 | -0.25 | 0.11 | 1.013046 | 1.03E+00  | 21.52795 | 0.025009 | 39.49 |
| 566    | 2017 | 0.586 | 0.11 | 1.013046 | 1.03E+00  | 23.07914 | 0.015994 | 27.87 |
| 793    | 2017 | 0.407 | 0.11 | 1.013046 | 1.03E+00  | 23.48528 | 0.041717 | 8.41  |
| 566    | 2017 | 0.345 | 0.11 | 1.013046 | 1.03E+00  | 23.07914 | 0.015994 | 27.87 |
| 657    | 2017 | -0.64 | 0.11 | 1.013046 | 1.026263  | 22.72697 | 0.050513 | 60.94 |
| 657    | 2017 | 0.33  | 0.11 | 1.013046 | 1.026263  | 22.72697 | 0.050513 | 60.94 |
| 657    | 2017 | -0.04 | 0.11 | 1.013046 | 1.026263  | 22.72697 | 0.050513 | 60.94 |
| 657    | 2017 | 0.686 | 0.11 | 1.013046 | 1.026263  | 22.72697 | 0.050513 | 60.94 |
| 657    | 2017 | -0.07 | 0.11 | 1.013046 | 1.026263  | 22.72697 | 0.050513 | 60.94 |
| 300189 | 2017 | 0.715 | 0.11 | 1.013046 | 1.026263  | 21.63611 | 0.000609 | 13.92 |
| 505    | 2017 | -0.99 | 0.11 | 1.013046 | 1.026263  | 22.52866 | 0.080255 | 42.06 |
| 300086 | 2017 | -0.25 | 0.11 | 1.013046 | 1.026263  | 21.52795 | 0.025009 | 39.49 |
| 566    | 2017 | 0.345 | 0.11 | 1.013046 | 1.026263  | 23.07914 | 0.015994 | 27.87 |
| 300086 | 2017 | -0.25 | 0.11 | 1.013046 | 1.026263  | 21.52795 | 0.025009 | 39.49 |
| 300086 | 2017 | -0.25 | 0.11 | 1.013046 | 1.026263  | 21.52795 | 0.025009 | 39.49 |
| 572    | 2017 | -0.18 | 0.11 | 1.013046 | 1.026263  | 23.48283 | -0.17118 | 28.8  |
| 600259 | 2017 | -0.88 | 0.11 | 1.013046 | 1.026263  | 22.19372 | 0.012318 | 42.87 |
| 793    | 2017 | 0.343 | 0.11 | 1.013046 | 1.026263  | 23.22357 | 0.041717 | 8.41  |
| 735    | 2017 | -0.3  | 0.11 | 1.013046 | 1.026263  | 22.54494 | 0.042312 | 17.14 |
| 793    | 2017 | -0.9  | 0.11 | 1.013046 | 1.026263  | 23.48528 | 0.041717 | 8.41  |
| 600238 | 2017 | -0.72 | 0.11 | 1.013046 | 1.026263  | 21.38013 | -0.13992 | 20.84 |
| 600238 | 2017 | -0.95 | 0.11 | 1.013046 | 1.026263  | 21.38013 | -0.13992 | 20.84 |
| 300189 | 2017 | 0.99  | 0.11 | 1.013046 | 1.026263  | 21.05967 | 0.000609 | 13.92 |
| 572    | 2017 | 0.009 | 0.11 | 1.013046 | 1.026263  | 23.48283 | -0.17118 | 28.8  |
| 300189 | 2017 | 0.99  | 0.11 | 1.013046 | 1.026263  | 21.63611 | 0.000609 | 13.92 |
| 601118 | 2017 | -0.99 | 0.11 | 1.013046 | 1.026263  | 23.31614 | -0.03474 | 69.06 |
| 600259 | 2017 | -0.43 | 0.11 | 1.013046 | 1.026263  | 22.19372 | 0.012318 | 42.87 |
| 300343 | 2017 | 0.589 | 0.01 | 1.951717 | 3.8091975 | 22.52648 | 0.088749 | 23.66 |
| 300343 | 2017 | 0.589 | 0.01 | 1.951717 | 3.8091975 | 22.52648 | 0.088749 | 23.66 |
| 2382   | 2017 | 0.196 | 0.01 | 1.951717 | 3.8091975 | 21.33142 | 0.141408 | 29.72 |
| 600783 | 2017 | 0.263 | 0.01 | 1.951717 | 3.8091975 | 22.44764 | 0.012002 | 68.53 |
| 2088   | 2017 | 0.683 | 0.01 | 1.951717 | 3.8091975 | 21.61522 | 0.11405  | 29    |
| 2810   | 2017 | 0.016 | 0.01 | 1.951717 | 3.8091975 | 20.82642 | 0.068644 | 31.12 |
| 600783 | 2017 | 0.152 | 0.01 | 1.951717 | 3.8091975 | 22.44764 | 0.012002 | 68.53 |
| 600783 | 2017 | 0.484 | 0.01 | 1.951717 | 3.8091975 | 22.44764 | 0.012002 | 68.53 |
| 2671   | 2017 | -0.27 | 0.01 | 1.951717 | 3.8091975 | 22.02648 | 0.022201 | 27.28 |
| 600587 | 2017 | -0.4  | 0.01 | 1.951717 | 3.8091975 | 23.24296 | 0.036105 | 28.77 |
| 600587 | 2017 | -0.35 | 0.01 | 1.951717 | 3.8091975 | 23.24296 | 0.036105 | 28.77 |
| 600783 | 2017 | 0.255 | 0.01 | 1.951717 | 3.8091975 | 22.44764 | 0.012002 | 68.53 |
| 600586 | 2017 | -0.81 | 0.01 | 1.951717 | 3.8091975 | 22.63541 | 0.026415 | 31.38 |
| 2521   | 2017 | 0.642 | 0.01 | 1.951717 | 3.8091975 | 22.21854 | 0.046978 | 16.31 |
| 2408   | 2017 | 0.628 | 0.01 | 1.951717 | 3.8091975 | 22.98971 | 0.126951 | 52.34 |
| 300233 | 2017 | 0.846 | 0.01 | 1.951717 | 3.8091975 | 22.3133  | 0.073712 | 28.49 |
| 2521   | 2017 | 0.642 | 0.01 | 1.951717 | 3.8091975 | 22.21854 | 0.046978 | 16.31 |
| 2581   | 2017 | 0.721 | 0.01 | 1.951717 | 3.8091975 | 22.28283 | 0.134336 | 26.38 |
| 600587 | 2017 | -0.38 | 0.01 | 1.951717 | 3.8091975 | 23.24296 | 0.036105 | 28.77 |
| 300233 | 2017 | 0.625 | 0.01 | 1.951717 | 3.8091975 | 22.3133  | 0.073712 | 28.49 |

|        |      |       |      |          |           |          |          |       |
|--------|------|-------|------|----------|-----------|----------|----------|-------|
| 300233 | 2017 | 0.846 | 0.01 | 1.951717 | 3.8091975 | 22.3133  | 0.073712 | 28.49 |
| 600783 | 2017 | 0.484 | 0.01 | 1.951717 | 3.8091975 | 22.44764 | 0.012002 | 68.53 |
| 2469   | 2017 | 1.205 | 0.01 | 1.951717 | 3.8091975 | 21.23901 | 0.053057 | 23.1  |
| 2469   | 2017 | 0.491 | 0.01 | 1.951717 | 3.8091975 | 21.23901 | 0.053057 | 23.1  |
| 2469   | 2017 | 1.205 | 0.01 | 1.951717 | 3.81E+00  | 21.23901 | 0.053057 | 23.1  |
| 300233 | 2017 | -0.25 | 0.01 | 1.951717 | 3.81E+00  | 22.3133  | 0.073712 | 28.49 |
| 2810   | 2017 | 0.016 | 0.01 | 1.951717 | 3.81E+00  | 20.82642 | 0.068644 | 31.12 |
| 600587 | 2017 | -0.43 | 0.01 | 1.951717 | 3.81E+00  | 23.24296 | 0.036105 | 28.77 |
| 600587 | 2017 | -0.43 | 0.01 | 1.951717 | 3.81E+00  | 23.24296 | 0.036105 | 28.77 |
| 2671   | 2017 | -0.27 | 0.01 | 1.951717 | 3.81E+00  | 22.02648 | 0.022201 | 27.28 |
| 2382   | 2017 | 0.329 | 0.01 | 1.951717 | 3.81E+00  | 21.33142 | 0.141408 | 29.72 |
| 600783 | 2017 | -0.84 | 0.01 | 1.951717 | 3.81E+00  | 22.44764 | 0.012002 | 68.53 |
| 2581   | 2017 | 0.721 | 0.01 | 1.951717 | 3.81E+00  | 22.10917 | 0.134336 | 26.38 |
| 2408   | 2017 | 0.628 | 0.01 | 1.951717 | 3.81E+00  | 22.98971 | 0.126951 | 52.34 |
| 2088   | 2017 | 0.683 | 0.01 | 1.951717 | 3.81E+00  | 21.61522 | 0.11405  | 29    |
| 600783 | 2017 | 0.484 | 0.01 | 1.951717 | 3.81E+00  | 22.44764 | 0.012002 | 68.53 |
| 726    | 2017 | 0.78  | 0.01 | 1.951717 | 3.8091975 | 23.04277 | 0.113609 | 15.21 |
| 726    | 2017 | 0.044 | 0.01 | 1.951717 | 3.8091975 | 23.04277 | 0.113609 | 15.21 |
| 600783 | 2017 | -0.46 | 0.01 | 1.951717 | 3.8091975 | 22.44764 | 0.012002 | 68.53 |
| 600586 | 2017 | -0.3  | 0.01 | 1.951717 | 3.8091975 | 22.98517 | 0.026415 | 31.38 |
| 600587 | 2017 | -0.38 | 0.01 | 1.951717 | 3.8091975 | 23.24296 | 0.036105 | 28.77 |
| 600587 | 2017 | -0.69 | 0.01 | 1.951717 | 3.8091975 | 23.24296 | 0.036105 | 28.77 |
| 600587 | 2017 | -0.22 | 0.01 | 1.951717 | 3.8091975 | 23.24296 | 0.036105 | 28.77 |
| 2581   | 2017 | 0.721 | 0.01 | 1.951717 | 3.8091975 | 22.10917 | 0.134336 | 26.38 |
| 300233 | 2017 | 0.846 | 0.01 | 1.951717 | 3.8091975 | 22.3133  | 0.073712 | 28.49 |
| 600783 | 2017 | 0.484 | 0.01 | 1.951717 | 3.8091975 | 22.44764 | 0.012002 | 68.53 |
| 300243 | 2017 | 0.862 | 0.01 | 1.951717 | 3.8091975 | 20.57939 | 0.059945 | 22.74 |
| 2469   | 2017 | 0.675 | 0.01 | 1.951717 | 3.8091975 | 21.10127 | 0.053057 | 23.1  |
| 2469   | 2017 | 0.675 | 0.01 | 1.951717 | 3.8091975 | 21.23901 | 0.053057 | 23.1  |
| 2671   | 2017 | -0.27 | 0.01 | 1.951717 | 3.8091975 | 21.93803 | 0.022201 | 27.28 |
| 2671   | 2017 | -0.27 | 0.01 | 1.951717 | 3.8091975 | 22.02648 | 0.022201 | 27.28 |
| 600783 | 2017 | -0.51 | 0.01 | 1.951717 | 3.8091975 | 22.44764 | 0.012002 | 68.53 |
| 2810   | 2017 | 0.016 | 0.01 | 1.951717 | 3.8091975 | 20.82642 | 0.068644 | 31.12 |
| 600783 | 2017 | -0.51 | 0.01 | 1.951717 | 3.8091975 | 22.44764 | 0.012002 | 68.53 |
| 2088   | 2017 | 0.683 | 0.01 | 1.951717 | 3.8091975 | 21.61522 | 0.11405  | 29    |
| 600586 | 2017 | -0.3  | 0.01 | 1.951717 | 3.8091975 | 22.98517 | 0.026415 | 31.38 |
| 600587 | 2017 | -0.57 | 0.01 | 1.951717 | 3.8091975 | 22.72345 | 0.036105 | 28.77 |
| 2088   | 2017 | 0.683 | 0.01 | 1.951717 | 3.8091975 | 21.61522 | 0.11405  | 29    |
| 600783 | 2017 | 0.484 | 0.01 | 1.951717 | 3.8091975 | 22.44764 | 0.012002 | 68.53 |
| 600587 | 2017 | -0.14 | 0.01 | 1.951717 | 3.8091975 | 23.24296 | 0.036105 | 28.77 |
| 600783 | 2017 | 0.484 | 0.01 | 1.951717 | 3.8091975 | 22.44764 | 0.012002 | 68.53 |
| 300243 | 2017 | 0.862 | 0.01 | 1.951717 | 3.8091975 | 20.59328 | 0.059945 | 22.74 |
| 600587 | 2017 | -0.5  | 0.01 | 1.951717 | 3.8091975 | 23.24296 | 0.036105 | 28.77 |
| 300343 | 2017 | 0.589 | 0.01 | 1.951717 | 3.8091975 | 22.52648 | 0.088749 | 23.66 |
| 600587 | 2017 | -0.34 | 0.01 | 1.951717 | 3.8091975 | 23.24296 | 0.036105 | 28.77 |
| 2581   | 2017 | 0.721 | 0.01 | 1.951717 | 3.8091975 | 22.10917 | 0.134336 | 26.38 |
| 300233 | 2017 | 0.653 | 0.01 | 1.951717 | 3.8091975 | 22.00715 | 0.073712 | 28.49 |
| 2521   | 2017 | 0.642 | 0.01 | 1.951717 | 3.8091975 | 22.21854 | 0.046978 | 16.31 |
| 2088   | 2017 | 0.683 | 0.01 | 1.951717 | 3.8091975 | 21.61522 | 0.11405  | 29    |
| 600783 | 2017 | 0.484 | 0.01 | 1.951717 | 3.8091975 | 22.44764 | 0.012002 | 68.53 |
| 600783 | 2017 | 0.484 | 0.01 | 1.951717 | 3.8091975 | 22.44764 | 0.012002 | 68.53 |
| 600783 | 2017 | 0.484 | 0.01 | 1.951717 | 3.8091975 | 22.44764 | 0.012002 | 68.53 |
| 2382   | 2017 | 0.66  | 0.01 | 1.951717 | 3.8091975 | 21.33142 | 0.141408 | 29.72 |
| 600783 | 2017 | -0.18 | 0.01 | 1.951717 | 3.8091975 | 22.44764 | 0.012002 | 68.53 |

|        |      |       |      |          |           |          |          |       |
|--------|------|-------|------|----------|-----------|----------|----------|-------|
| 600587 | 2017 | -0.43 | 0.01 | 1.951717 | 3.8091975 | 23.24296 | 0.036105 | 28.77 |
| 2810   | 2017 | 0.016 | 0.01 | 1.951717 | 3.8091975 | 20.82642 | 0.068644 | 31.12 |
| 2671   | 2017 | -0.27 | 0.01 | 1.951717 | 3.8091975 | 22.02648 | 0.022201 | 27.28 |
| 600587 | 2017 | -0.43 | 0.01 | 1.951717 | 3.8091975 | 23.24296 | 0.036105 | 28.77 |
| 600587 | 2017 | -0.34 | 0.01 | 1.951717 | 3.8091975 | 23.24296 | 0.036105 | 28.77 |
| 2408   | 2017 | 0.628 | 0.01 | 1.951717 | 3.8091975 | 22.98971 | 0.126951 | 52.34 |
| 600586 | 2017 | -0.81 | 0.01 | 1.951717 | 3.8091975 | 22.98517 | 0.026415 | 31.38 |
| 2408   | 2017 | 0.628 | 0.01 | 1.951717 | 3.8091975 | 22.98971 | 0.126951 | 52.34 |
| 600783 | 2017 | 0.484 | 0.01 | 1.951717 | 3.8091975 | 22.44764 | 0.012002 | 68.53 |
| 600783 | 2017 | -0.55 | 0.01 | 1.951717 | 3.8091975 | 22.44764 | 0.012002 | 68.53 |
| 2408   | 2017 | 0.628 | 0.01 | 1.951717 | 3.8091975 | 22.92539 | 0.126951 | 52.34 |
| 600783 | 2017 | 0.484 | 0.01 | 1.951717 | 3.8091975 | 22.44764 | 0.012002 | 68.53 |
| 2810   | 2017 | 0.016 | 0.01 | 1.951717 | 3.8091975 | 20.81255 | 0.068644 | 31.12 |
| 2382   | 2017 | -0    | 0.01 | 1.951717 | 3.8091975 | 21.33142 | 0.141408 | 29.72 |
| 2469   | 2017 | 0.101 | 0.01 | 1.951717 | 3.8091975 | 21.23901 | 0.053057 | 23.1  |
| 600586 | 2017 | -0.81 | 0.01 | 1.951717 | 3.8091975 | 22.98517 | 0.026415 | 31.38 |
| 600783 | 2017 | -0.58 | 0.01 | 1.951717 | 3.8091975 | 22.44764 | 0.012002 | 68.53 |
| 726    | 2017 | 0.064 | 0.01 | 1.951717 | 3.8091975 | 22.74582 | 0.113609 | 15.21 |
| 300343 | 2017 | 0.589 | 0.01 | 1.951717 | 3.8091975 | 22.52648 | 0.088749 | 23.66 |
| 300233 | 2017 | 0.356 | 0.01 | 1.951717 | 3.8091975 | 22.3133  | 0.073712 | 28.49 |
| 300243 | 2017 | 0.862 | 0.01 | 1.951717 | 3.8091975 | 20.59328 | 0.059945 | 22.74 |
| 600783 | 2017 | -0.03 | 0.01 | 1.951717 | 3.8091975 | 22.44764 | 0.012002 | 68.53 |
| 2581   | 2017 | 0.721 | 0.01 | 1.951717 | 3.8091975 | 22.10917 | 0.134336 | 26.38 |
| 300233 | 2017 | 0.653 | 0.01 | 1.951717 | 3.8091975 | 22.3133  | 0.073712 | 28.49 |
| 2382   | 2017 | 0.329 | 0.01 | 1.951717 | 3.8091975 | 21.33142 | 0.141408 | 29.72 |
| 600529 | 2017 | 0.362 | 0.01 | 1.951717 | 3.8091975 | 22.15362 | 0.080841 | 15.66 |
| 2088   | 2017 | -0.64 | 0.01 | 1.951717 | 3.8091975 | 21.61522 | 0.11405  | 29    |
| 600783 | 2017 | 0.484 | 0.01 | 1.951717 | 3.8091975 | 22.44764 | 0.012002 | 68.53 |
| 300343 | 2017 | 0.589 | 0.01 | 1.951717 | 3.8091975 | 22.52648 | 0.088749 | 23.66 |
| 726    | 2017 | 0.064 | 0.01 | 1.951717 | 3.8091975 | 23.04277 | 0.113609 | 15.21 |
| 2088   | 2017 | 0.683 | 0.01 | 1.951717 | 3.8091975 | 21.61522 | 0.11405  | 29    |
| 600783 | 2017 | -0    | 0.01 | 1.951717 | 3.8091975 | 22.44764 | 0.012002 | 68.53 |
| 300233 | 2017 | 0.429 | 0.01 | 1.951717 | 3.8091975 | 22.3133  | 0.073712 | 28.49 |
| 2469   | 2017 | 0.101 | 0.01 | 1.951717 | 3.8091975 | 21.23901 | 0.053057 | 23.1  |
| 2088   | 2017 | -0.64 | 0.01 | 1.951717 | 3.8091975 | 21.62161 | 0.11405  | 29    |
| 300233 | 2017 | 0.846 | 0.01 | 1.951717 | 3.8091975 | 22.3133  | 0.073712 | 28.49 |
| 726    | 2017 | 0.064 | 0.01 | 1.951717 | 3.8091975 | 23.04277 | 0.113609 | 15.21 |
| 600783 | 2017 | -0.4  | 0.01 | 1.951717 | 3.8091975 | 22.00787 | 0.012002 | 68.53 |
| 600783 | 2017 | -0.05 | 0.01 | 1.951717 | 3.8091975 | 22.44764 | 0.012002 | 68.53 |
| 2382   | 2017 | 0.329 | 0.01 | 1.951717 | 3.8091975 | 21.33142 | 0.141408 | 29.72 |
| 2408   | 2017 | 0.628 | 0.01 | 1.951717 | 3.8091975 | 22.98971 | 0.126951 | 52.34 |
| 2521   | 2017 | 0.642 | 0.01 | 1.951717 | 3.8091975 | 21.93617 | 0.046978 | 16.31 |
| 600529 | 2017 | 0.362 | 0.01 | 1.951717 | 3.8091975 | 22.12153 | 0.080841 | 15.66 |
| 600783 | 2017 | 0.484 | 0.01 | 1.951717 | 3.8091975 | 22.44764 | 0.012002 | 68.53 |
| 600586 | 2017 | -0.81 | 0.01 | 1.951717 | 3.8091975 | 22.98517 | 0.026415 | 31.38 |
| 300343 | 2017 | 0.589 | 0.01 | 1.951717 | 3.8091975 | 22.16677 | 0.088749 | 23.66 |
| 600783 | 2017 | -0.84 | 0.01 | 1.951717 | 3.8091975 | 22.44764 | 0.012002 | 68.53 |
| 600783 | 2017 | -0.4  | 0.01 | 1.951717 | 3.8091975 | 22.44764 | 0.012002 | 68.53 |
| 600783 | 2017 | -0.21 | 0.01 | 1.951717 | 3.8091975 | 22.44764 | 0.012002 | 68.53 |
| 2581   | 2017 | 0.721 | 0.01 | 1.951717 | 3.8091975 | 22.10917 | 0.134336 | 26.38 |
| 2088   | 2017 | 0.404 | 0.01 | 1.951717 | 3.8091975 | 21.61522 | 0.11405  | 29    |
| 2810   | 2017 | 0.016 | 0.01 | 1.951717 | 3.8091975 | 20.82642 | 0.068644 | 31.12 |
| 2581   | 2017 | 0.721 | 0.01 | 1.951717 | 3.8091975 | 22.10917 | 0.134336 | 26.38 |
| 600783 | 2017 | -0.84 | 0.01 | 1.951717 | 3.8091975 | 22.44764 | 0.012002 | 68.53 |

|        |      |       |      |          |            |          |          |       |
|--------|------|-------|------|----------|------------|----------|----------|-------|
| 600783 | 2017 | 0.484 | 0.01 | 1.951717 | 3.8091975  | 22.44764 | 0.012002 | 68.53 |
| 600586 | 2017 | -0.68 | 0.01 | 1.951717 | 3.8091975  | 22.98517 | 0.026415 | 31.38 |
| 600529 | 2017 | 0.362 | 0.01 | 1.951717 | 3.8091975  | 22.15362 | 0.080841 | 15.66 |
| 300233 | 2017 | 0.846 | 0.01 | 1.951717 | 3.8091975  | 22.3133  | 0.073712 | 28.49 |
| 600783 | 2017 | 0.484 | 0.01 | 1.951717 | 3.8091975  | 22.44764 | 0.012002 | 68.53 |
| 300233 | 2017 | 0.159 | 0.01 | 1.951717 | 3.8091975  | 22.3133  | 0.073712 | 28.49 |
| 2382   | 2017 | -0.4  | 0.01 | 1.951717 | 3.8091975  | 20.96116 | 0.141408 | 29.72 |
| 600783 | 2017 | 0.484 | 0.01 | 1.951717 | 3.8091975  | 22.44764 | 0.012002 | 68.53 |
| 600783 | 2017 | 0.484 | 0.01 | 1.951717 | 3.8091975  | 22.44764 | 0.012002 | 68.53 |
| 600587 | 2017 | -0.43 | 0.01 | 1.951717 | 3.8091975  | 23.24296 | 0.036105 | 28.77 |
| 2581   | 2017 | 0.721 | 0.01 | 1.951717 | 3.8091975  | 22.10917 | 0.134336 | 26.38 |
| 600586 | 2017 | -0.81 | 0.01 | 1.951717 | 3.8091975  | 22.98517 | 0.026415 | 31.38 |
| 600783 | 2017 | 0.253 | 0.01 | 1.951717 | 3.8091975  | 22.44764 | 0.012002 | 68.53 |
| 2521   | 2017 | 0.642 | 0.01 | 1.951717 | 3.8091975  | 22.21854 | 0.046978 | 16.31 |
| 2581   | 2017 | 0.721 | 0.01 | 1.951717 | 3.8091975  | 22.10917 | 0.134336 | 26.38 |
| 300452 | 2017 | 0.68  | 0.04 | 1.398593 | 1.9560635  | 20.31741 | 0.105718 | 26.69 |
| 300452 | 2017 | 0.68  | 0.04 | 1.398593 | 1.9560635  | 20.183   | 0.105718 | 26.69 |
| 300452 | 2017 | 0.68  | 0.04 | 1.398593 | 1.9560635  | 20.31741 | 0.105718 | 26.69 |
| 603369 | 2017 | -0.49 | 0.02 | 0.898217 | 0.80679338 | 22.70057 | 0.169608 | 44.72 |
| 603369 | 2017 | -0.49 | 0.02 | 0.898217 | 0.80679338 | 22.5907  | 0.169608 | 44.72 |
| 603299 | 2017 | -0.66 | 0.02 | 0.898217 | 0.80679338 | 22.22717 | 0.083601 | 48.83 |
| 603369 | 2017 | -0.77 | 0.02 | 0.898217 | 0.80679338 | 22.70057 | 0.169608 | 44.72 |
| 603299 | 2017 | -0.66 | 0.02 | 0.898217 | 0.80679338 | 22.22717 | 0.083601 | 48.83 |
| 603299 | 2017 | -0.48 | 0.02 | 0.898217 | 0.80679338 | 22.22717 | 0.083601 | 48.83 |
| 603299 | 2017 | -0.66 | 0.02 | 0.898217 | 0.80679338 | 22.22717 | 0.083601 | 48.83 |
| 603299 | 2017 | -0.66 | 0.02 | 0.898217 | 0.80679338 | 22.22717 | 0.083601 | 48.83 |
| 603299 | 2017 | -0.5  | 0.02 | 0.898217 | 0.80679338 | 22.22717 | 0.083601 | 48.83 |
| 603299 | 2017 | -0.53 | 0.02 | 0.898217 | 0.80679338 | 22.15746 | 0.083601 | 48.83 |
| 603369 | 2017 | -0.93 | 0.02 | 0.898217 | 0.80679338 | 22.70057 | 0.169608 | 44.72 |
| 603369 | 2017 | -0.93 | 0.02 | 0.898217 | 0.80679338 | 22.70057 | 0.169608 | 44.72 |
| 300457 | 2017 | -0.37 | 0.02 | 0.693147 | 0.48045301 | 21.87111 | 0.180165 | 42.07 |
| 300207 | 2017 | 0.073 | 0.02 | 0.693147 | 0.48045301 | 23.29273 | 0.183019 | 33.82 |
| 300044 | 2017 | 1.072 | 0.02 | 0.693147 | 0.48045301 | 22.04703 | 0.077296 | 14.65 |
| 2334   | 2017 | 1.263 | 0.02 | 0.693147 | 0.48045301 | 21.89236 | 0.108504 | 17.66 |
| 2215   | 2017 | 0.579 | 0.02 | 0.693147 | 0.48045301 | 22.23673 | 0.142671 | 27.02 |
| 2218   | 2017 | 0.332 | 0.02 | 0.693147 | 0.48045301 | 22.47249 | 0.057583 | 32.55 |
| 2215   | 2017 | 0.579 | 0.02 | 0.693147 | 0.48045301 | 22.23673 | 0.142671 | 27.02 |
| 2456   | 2017 | 0.714 | 0.02 | 0.693147 | 0.48045301 | 24.15202 | 0.089338 | 19.29 |
| 2475   | 2017 | -0.33 | 0.02 | 0.693147 | 0.48045301 | 24.01487 | 0.125514 | 48.17 |
| 300546 | 2017 | 0.454 | 0.02 | 0.693147 | 0.48045301 | 20.66435 | 0.125052 | 39.25 |
| 300572 | 2017 | 0.124 | 0.02 | 0.693147 | 0.48045301 | 20.85017 | 0.141372 | 27.88 |
| 300052 | 2017 | 0.869 | 0.02 | 0.693147 | 0.48045301 | 20.85417 | 0.062799 | 27.86 |
| 300207 | 2017 | -0.44 | 0.02 | 0.693147 | 0.48045301 | 23.29273 | 0.183019 | 33.82 |
| 300151 | 2017 | -0.53 | 0.02 | 0.693147 | 0.48045301 | 20.69812 | 0.040844 | 45.86 |
| 60     | 2017 | -0.25 | 0.02 | 0.693147 | 0.48045301 | 23.66078 | 0.105093 | 27.51 |
| 300178 | 2017 | 0.479 | 0.02 | 0.693147 | 0.48045301 | 22.67691 | 0.113122 | 28.64 |
| 2121   | 2017 | 0.81  | 0.02 | 0.693147 | 0.48045301 | 23.45338 | 0.081888 | 43.14 |
| 2681   | 2017 | -0.32 | 0.02 | 0.693147 | 0.48045301 | 22.89595 | 0.07212  | 37.7  |
| 90     | 2017 | -0.19 | 0.02 | 0.693147 | 0.48045301 | 23.97336 | 0.088657 | 23.47 |
| 2475   | 2017 | -0.5  | 0.02 | 0.693147 | 0.48045301 | 24.01487 | 0.125514 | 48.17 |
| 2213   | 2017 | 0.761 | 0.02 | 0.693147 | 0.48045301 | 20.10336 | 0.027672 | 14.56 |
| 2052   | 2017 | 0.519 | 0.02 | 0.693147 | 0.48045301 | 21.31936 | 0.009644 | 16.5  |
| 300136 | 2017 | -0.33 | 0.02 | 0.693147 | 0.48045301 | 22.39722 | 0.302158 | 20.14 |
| 300130 | 2017 | 0.586 | 0.02 | 0.693147 | 0.48045301 | 22.08278 | 0.035605 | 28.87 |

|        |      |       |      |          |            |          |          |       |
|--------|------|-------|------|----------|------------|----------|----------|-------|
| 2238   | 2017 | -0.5  | 0.02 | 0.693147 | 0.48045301 | 22.07978 | 0.088108 | 57.77 |
| 2831   | 2017 | -0    | 0.02 | 0.693147 | 0.48045301 | 22.91861 | 0.185639 | 52.75 |
| 2528   | 2017 | 0.875 | 0.02 | 0.693147 | 0.48045301 | 22.20819 | 0.043314 | 30.7  |
| 2822   | 2017 | -0.49 | 0.02 | 0.693147 | 0.48045301 | 22.14153 | 0.078734 | 33.07 |
| 9      | 2017 | -0.45 | 0.02 | 0.693147 | 0.48045301 | 24.02315 | -0.0567  | 11.91 |
| 300115 | 2017 | 1.059 | 0.02 | 0.693147 | 0.48045301 | 23.03417 | 0.126642 | 42.72 |
| 50     | 2017 | 0.825 | 0.02 | 0.693147 | 0.48045301 | 24.1128  | 0.055766 | 20.81 |
| 300134 | 2017 | -0.08 | 0.02 | 0.693147 | 0.48045301 | 22.67964 | -0.098   | 43.39 |
| 39     | 2017 | -0.18 | 0.02 | 0.693147 | 0.48045301 | 25.59544 | 0.005707 | 58.02 |
| 39     | 2017 | -0.71 | 0.02 | 0.693147 | 0.48045301 | 25.59544 | 0.005707 | 58.02 |
| 300227 | 2017 | -0.48 | 0.02 | 0.693147 | 0.48045301 | 20.78301 | 0.082602 | 18.86 |
| 2191   | 2017 | -0.15 | 0.02 | 0.693147 | 0.48045301 | 22.81806 | 0.100535 | 30.97 |
| 2551   | 2017 | -0.23 | 0.02 | 0.693147 | 0.48045301 | 22.1843  | 0.070767 | 39.58 |
| 300178 | 2017 | 0.479 | 0.02 | 0.693147 | 0.48045301 | 22.67691 | 0.113122 | 28.64 |
| 70     | 2017 | 0.133 | 0.02 | 0.693147 | 0.48045301 | 22.52944 | 0.05761  | 39.18 |
| 2294   | 2017 | 1.137 | 0.02 | 0.693147 | 0.48045301 | 22.64961 | 0.233316 | 65.73 |
| 300162 | 2017 | 0.158 | 0.02 | 0.693147 | 0.48045301 | 21.02774 | 0.019384 | 22.54 |
| 2475   | 2017 | -0.24 | 0.02 | 0.693147 | 0.48045301 | 24.01487 | 0.125514 | 48.17 |
| 300457 | 2017 | -0.27 | 0.02 | 0.693147 | 0.48045301 | 21.87111 | 0.180165 | 42.07 |
| 12     | 2017 | -0.18 | 0.02 | 0.693147 | 4.80E-01   | 23.69547 | 0.064394 | 14.84 |
| 27     | 2017 | -0.18 | 0.02 | 0.693147 | 4.80E-01   | 25.07007 | 0.034182 | 47.82 |
| 300130 | 2017 | 0.069 | 0.02 | 0.693147 | 4.80E-01   | 22.08278 | 0.035605 | 28.87 |
| 2197   | 2017 | -0.19 | 0.02 | 0.693147 | 4.80E-01   | 22.39496 | 0.010473 | 20.32 |
| 999    | 2017 | -0.28 | 0.02 | 0.693147 | 4.80E-01   | 23.508   | 0.131014 | 63.6  |
| 300227 | 2017 | 0.842 | 0.02 | 0.693147 | 4.80E-01   | 20.78301 | 0.082602 | 18.86 |
| 66     | 2017 | 0.368 | 0.02 | 0.693147 | 4.80E-01   | 23.44467 | 0.092092 | 40.91 |
| 600525 | 2017 | 0.151 | 0.02 | 0.693147 | 4.80E-01   | 23.74551 | 0.147776 | 7.84  |
| 2341   | 2017 | -0.34 | 0.02 | 0.693147 | 4.80E-01   | 22.59578 | 0.049358 | 25.59 |
| 2121   | 2017 | 0.925 | 0.02 | 0.693147 | 4.80E-01   | 23.45338 | 0.081888 | 43.14 |
| 2052   | 2017 | 0.633 | 0.02 | 0.693147 | 4.80E-01   | 21.31936 | 0.009644 | 16.5  |
| 300197 | 2017 | 0.198 | 0.02 | 0.693147 | 4.80E-01   | 23.73369 | 0.119324 | 41.56 |
| 60     | 2017 | 0.523 | 0.02 | 0.693147 | 0.48045301 | 23.66078 | 0.105093 | 27.51 |
| 300037 | 2017 | 0.346 | 0.02 | 0.693147 | 0.48045301 | 21.87012 | 0.116608 | 15.09 |
| 62     | 2017 | 0.56  | 0.02 | 0.693147 | 0.48045301 | 22.87101 | 0.025772 | 70.76 |
| 300012 | 2017 | -0.42 | 0.02 | 0.693147 | 0.48045301 | 21.8565  | 0.054239 | 11.72 |
| 2359   | 2017 | -0.53 | 0.02 | 0.693147 | 0.48045301 | 22.68654 | 0.035655 | 35.15 |
| 2052   | 2017 | 0.141 | 0.02 | 0.693147 | 0.48045301 | 21.31936 | 0.009644 | 16.5  |
| 300532 | 2017 | 0.573 | 0.02 | 0.693147 | 0.48045301 | 20.99494 | 0.118284 | 46.12 |
| 12     | 2017 | 0.073 | 0.02 | 0.693147 | 0.48045301 | 23.69547 | 0.064394 | 14.84 |
| 60     | 2017 | -0.14 | 0.02 | 0.693147 | 0.48045301 | 23.66078 | 0.105093 | 27.51 |
| 2139   | 2017 | 0.445 | 0.02 | 0.693147 | 0.48045301 | 21.88924 | 0.108329 | 23.24 |
| 300012 | 2017 | 0.909 | 0.02 | 0.693147 | 0.48045301 | 21.9807  | 0.054239 | 11.72 |
| 300207 | 2017 | -0.03 | 0.02 | 0.693147 | 0.48045301 | 23.29273 | 0.183019 | 33.82 |
| 49     | 2017 | -0.27 | 0.02 | 0.693147 | 0.48045301 | 22.75392 | 0.2004   | 45.23 |
| 600525 | 2017 | 0.458 | 0.02 | 0.693147 | 0.48045301 | 23.74551 | 0.147776 | 7.84  |
| 2340   | 2017 | 0.618 | 0.02 | 0.693147 | 0.48045301 | 23.82563 | 0.082629 | 12.44 |
| 39     | 2017 | -0.65 | 0.02 | 0.693147 | 0.48045301 | 25.59544 | 0.005707 | 58.02 |
| 2325   | 2017 | 0.153 | 0.02 | 0.693147 | 0.48045301 | 23.13825 | 0.033944 | 30.01 |
| 300206 | 2017 | 0.601 | 0.02 | 0.693147 | 0.48045301 | 21.07889 | 0.030303 | 20.86 |
| 300197 | 2017 | -0.02 | 0.02 | 0.693147 | 0.48045301 | 23.73369 | 0.119324 | 41.56 |
| 2213   | 2017 | 0.761 | 0.02 | 0.693147 | 4.80E-01   | 20.10336 | 0.027672 | 14.56 |
| 2660   | 2017 | -0.08 | 0.02 | 0.693147 | 4.80E-01   | 21.44009 | 0.027671 | 30.59 |
| 21     | 2017 | -0.9  | 0.02 | 0.693147 | 4.80E-01   | 23.53264 | -0.02587 | 44.51 |
| 2334   | 2017 | 0.27  | 0.02 | 0.693147 | 4.80E-01   | 21.89236 | 0.108504 | 17.66 |

|        |      |       |      |          |            |          |          |       |
|--------|------|-------|------|----------|------------|----------|----------|-------|
| 2139   | 2017 | 0.445 | 0.02 | 0.693147 | 0.48045301 | 21.88924 | 0.108329 | 23.24 |
| 2594   | 2017 | -0.47 | 0.02 | 0.693147 | 0.48045301 | 25.74206 | 0.082007 | 25.26 |
| 2334   | 2017 | 1.594 | 0.02 | 0.693147 | 0.48045301 | 21.89236 | 0.108504 | 17.66 |
| 300252 | 2017 | -0.01 | 0.02 | 0.693147 | 0.48045301 | 22.49488 | 0.062486 | 34.12 |
| 2227   | 2017 | 0.926 | 0.02 | 0.693147 | 0.48045301 | 20.79148 | 0.018525 | 57.57 |
| 2047   | 2017 | -0.43 | 0.02 | 0.693147 | 0.48045301 | 22.84876 | 0.099929 | 24.48 |
| 63     | 2017 | 0.253 | 0.02 | 0.693147 | 0.48045301 | 25.69282 | 0.212929 | 30.34 |
| 2294   | 2017 | 1.137 | 0.02 | 0.693147 | 0.48045301 | 22.64961 | 0.233316 | 65.73 |
| 2121   | 2017 | 1.332 | 0.02 | 0.693147 | 0.48045301 | 23.45338 | 0.081888 | 43.14 |
| 2724   | 2017 | 0.02  | 0.02 | 0.693147 | 0.48045301 | 21.44693 | 0.086153 | 70.42 |
| 2055   | 2017 | -0.2  | 0.02 | 0.693147 | 0.48045301 | 22.98371 | 0.052418 | 29.92 |
| 300317 | 2017 | -0.28 | 0.02 | 0.693147 | 0.48045301 | 22.92319 | 0.058224 | 26.39 |
| 2551   | 2017 | -0.33 | 0.02 | 0.693147 | 0.48045301 | 22.1843  | 0.070767 | 39.58 |
| 2359   | 2017 | -0.64 | 0.02 | 0.693147 | 0.48045301 | 23.25736 | 0.035655 | 35.15 |
| 300124 | 2017 | 0.484 | 0.02 | 0.693147 | 0.48045301 | 22.92571 | 0.190616 | 18.63 |
| 34     | 2017 | -0.31 | 0.02 | 0.693147 | 0.48045301 | 23.91264 | 0.215374 | 23.66 |
| 78     | 2017 | 0.357 | 0.02 | 0.693147 | 0.48045301 | 24.15287 | 0.21147  | 45.96 |
| 2548   | 2017 | -0.84 | 0.02 | 0.693147 | 0.48045301 | 21.97989 | 0.056841 | 39.65 |
| 300319 | 2017 | 0.011 | 0.02 | 0.693147 | 0.48045301 | 21.85769 | -0.18104 | 27.06 |
| 300568 | 2017 | 0.186 | 0.02 | 0.693147 | 0.48045301 | 21.58767 | 0.068613 | 26.2  |
| 2436   | 2017 | 0.32  | 0.02 | 0.693147 | 0.48045301 | 22.21287 | 0.077427 | 19.76 |
| 66     | 2017 | -0.03 | 0.02 | 0.693147 | 0.48045301 | 23.44467 | 0.05082  | 40.91 |
| 2482   | 2017 | -0.21 | 0.02 | 0.693147 | 0.48045301 | 23.24161 | 0.096247 | 39.71 |
| 300199 | 2017 | 0.545 | 0.02 | 0.693147 | 0.48045301 | 22.3906  | 0.084874 | 25.36 |
| 300232 | 2017 | -0.24 | 0.02 | 0.693147 | 0.48045301 | 22.31078 | 0.140586 | 41.38 |
| 300199 | 2017 | 0.545 | 0.02 | 0.693147 | 0.48045301 | 22.12543 | 0.084874 | 25.36 |
| 300232 | 2017 | -0.43 | 0.02 | 0.693147 | 0.48045301 | 22.31078 | 0.140586 | 41.38 |
| 2008   | 2017 | 0.566 | 0.02 | 0.693147 | 0.48045301 | 23.36965 | 0.234874 | 15.46 |
| 2191   | 2017 | 0.348 | 0.02 | 0.693147 | 0.48045301 | 22.81806 | 0.100535 | 30.97 |
| 2334   | 2017 | 0.27  | 0.02 | 0.693147 | 0.48045301 | 21.89236 | 0.108504 | 17.66 |
| 2121   | 2017 | 0.829 | 0.02 | 0.693147 | 0.48045301 | 23.45338 | 0.081888 | 43.14 |
| 2356   | 2017 | -0.78 | 0.02 | 0.693147 | 0.48045301 | 22.66988 | 0.10405  | 49.28 |
| 39     | 2017 | -0.23 | 0.02 | 0.693147 | 0.48045301 | 25.59544 | 0.005707 | 58.02 |
| 300241 | 2017 | 0.261 | 0.02 | 0.693147 | 0.48045301 | 21.59838 | 0.108298 | 24.8  |
| 48     | 2017 | 0.395 | 0.02 | 0.693147 | 0.48045301 | 21.9703  | -0.19578 | 31.65 |
| 21     | 2017 | -0.11 | 0.02 | 0.693147 | 0.48045301 | 22.78618 | -0.02587 | 44.51 |
| 300134 | 2017 | 0.315 | 0.02 | 0.693147 | 0.48045301 | 22.67964 | -0.098   | 43.39 |
| 2121   | 2017 | 1.332 | 0.02 | 0.693147 | 0.48045301 | 23.45338 | 0.081888 | 43.14 |
| 300197 | 2017 | -0.12 | 0.02 | 0.693147 | 0.48045301 | 23.73369 | 0.119324 | 41.56 |
| 300197 | 2017 | 0.081 | 0.02 | 0.693147 | 0.48045301 | 23.73369 | 0.119324 | 41.56 |
| 300197 | 2017 | 0.198 | 0.02 | 0.693147 | 0.48045301 | 23.73369 | 0.119324 | 41.56 |
| 300197 | 2017 | -0.03 | 0.02 | 0.693147 | 0.48045301 | 23.73369 | 0.119324 | 41.56 |
| 300197 | 2017 | -0.62 | 0.02 | 0.693147 | 0.48045301 | 23.73369 | 0.119324 | 41.56 |
| 300311 | 2017 | 1.937 | 0.02 | 0.693147 | 0.48045301 | 21.58983 | 0.11825  | 39.49 |
| 2456   | 2017 | -0.51 | 0.02 | 0.693147 | 0.48045301 | 24.15202 | 0.089338 | 19.29 |
| 2218   | 2017 | 0.332 | 0.02 | 0.693147 | 0.48045301 | 22.47249 | 0.057583 | 32.55 |
| 62     | 2017 | -0.23 | 0.02 | 0.693147 | 0.48045301 | 22.87101 | 0.102065 | 70.76 |
| 2475   | 2017 | -0.2  | 0.02 | 0.693147 | 0.48045301 | 24.01487 | 0.125514 | 48.17 |
| 66     | 2017 | -0.06 | 0.02 | 0.693147 | 0.48045301 | 23.44467 | 0.05082  | 40.91 |
| 300269 | 2017 | -0.31 | 0.02 | 0.693147 | 0.48045301 | 22.75694 | 0.021003 | 18.81 |
| 2218   | 2017 | 0.332 | 0.02 | 0.693147 | 0.48045301 | 22.47249 | 0.057583 | 32.55 |
| 2681   | 2017 | -0.29 | 0.02 | 0.693147 | 0.48045301 | 22.89595 | 0.07212  | 37.7  |
| 2314   | 2017 | -0.93 | 0.02 | 0.693147 | 0.48045301 | 22.8636  | 0.088439 | 50.03 |
| 21     | 2017 | -0.41 | 0.02 | 0.693147 | 0.48045301 | 23.53264 | -0.02587 | 44.51 |



|        |      |       |      |          |            |          |          |       |
|--------|------|-------|------|----------|------------|----------|----------|-------|
| 2289   | 2017 | 0.569 | 0.02 | 0.693147 | 0.48045301 | 20.41386 | -0.27749 | 8.42  |
| 300241 | 2017 | -0.44 | 0.02 | 0.693147 | 0.48045301 | 21.59838 | 0.108298 | 24.8  |
| 2243   | 2017 | 0.285 | 0.02 | 0.693147 | 0.48045301 | 21.37071 | 0.033161 | 51.52 |
| 2751   | 2017 | 0.248 | 0.02 | 0.693147 | 0.48045301 | 21.52582 | 0.053866 | 27.94 |
| 63     | 2017 | 1.204 | 0.02 | 0.693147 | 0.48045301 | 25.69282 | 0.212929 | 30.34 |
| 2789   | 2017 | -0.14 | 0.02 | 0.693147 | 0.48045301 | 22.01071 | 0.077782 | 45.23 |
| 2256   | 2017 | -0.17 | 0.02 | 0.693147 | 0.48045301 | 22.07361 | 0.065891 | 26.67 |
| 2672   | 2017 | 0.082 | 0.02 | 0.693147 | 0.48045301 | 22.94682 | 0.128037 | 22.53 |
| 66     | 2017 | -0    | 0.02 | 0.693147 | 0.48045301 | 23.44467 | 0.05082  | 40.91 |
| 300570 | 2017 | -0.26 | 0.02 | 0.693147 | 0.48045301 | 20.95733 | 0.089072 | 16.08 |
| 300124 | 2017 | 0.285 | 0.02 | 0.693147 | 0.48045301 | 22.92571 | 0.190616 | 18.63 |
| 2775   | 2017 | -0.19 | 0.02 | 0.693147 | 0.48045301 | 21.70726 | 0.161419 | 20.65 |
| 300232 | 2017 | -0.29 | 0.02 | 0.693147 | 0.48045301 | 22.31078 | 0.140586 | 41.38 |
| 2388   | 2017 | -0.54 | 0.02 | 0.693147 | 0.48045301 | 21.30378 | 0.053824 | 46.42 |
| 300389 | 2017 | -0.19 | 0.02 | 0.693147 | 0.48045301 | 21.3106  | 0.099564 | 25.81 |
| 300131 | 2017 | -0.69 | 0.02 | 0.693147 | 0.48045301 | 22.35561 | 0.085853 | 26.55 |
| 2047   | 2017 | -0.5  | 0.02 | 0.693147 | 0.48045301 | 22.40221 | 0.099929 | 24.48 |
| 2813   | 2017 | 0.055 | 0.02 | 0.693147 | 0.48045301 | 21.20602 | 0.036798 | 67.97 |
| 2831   | 2017 | -0.32 | 0.02 | 0.693147 | 0.48045301 | 22.65939 | 0.185639 | 52.75 |
| 300206 | 2017 | 0.838 | 0.02 | 0.693147 | 0.48045301 | 21.07889 | 0.030303 | 20.86 |
| 300115 | 2017 | -0.27 | 0.02 | 0.693147 | 0.48045301 | 23.03417 | 0.126642 | 42.72 |
| 603118 | 2017 | -0.23 | 0.02 | 0.693147 | 0.48045301 | 22.70093 | 0.022881 | 24.98 |
| 2256   | 2017 | -0.17 | 0.02 | 0.693147 | 0.48045301 | 22.07361 | 0.065891 | 26.67 |
| 300134 | 2017 | 0.363 | 0.02 | 0.693147 | 0.48045301 | 22.67964 | -0.098   | 43.39 |
| 39     | 2017 | -0.84 | 0.02 | 0.693147 | 0.48045301 | 25.59544 | 0.005707 | 58.02 |
| 2763   | 2017 | -0.82 | 0.02 | 0.693147 | 0.48045301 | 21.51149 | 0.132615 | 35.6  |
| 2139   | 2017 | 0.445 | 0.02 | 0.693147 | 0.48045301 | 21.88924 | 0.108329 | 23.24 |
| 2008   | 2017 | 1.228 | 0.02 | 0.693147 | 0.48045301 | 23.36965 | 0.234874 | 15.46 |
| 9      | 2017 | -0.72 | 0.02 | 0.693147 | 0.48045301 | 24.02315 | -0.0567  | 11.91 |
| 2475   | 2017 | -0.44 | 0.02 | 0.693147 | 0.48045301 | 24.01487 | 0.125514 | 48.17 |
| 2341   | 2017 | -0.56 | 0.02 | 0.693147 | 0.48045301 | 22.59578 | 0.049358 | 25.59 |
| 300241 | 2017 | -0.44 | 0.02 | 0.693147 | 0.48045301 | 21.59838 | 0.108298 | 24.8  |
| 2294   | 2017 | 1.137 | 0.02 | 0.693147 | 0.48045301 | 22.64961 | 0.233316 | 65.73 |
| 300207 | 2017 | -0.19 | 0.02 | 0.693147 | 0.48045301 | 23.29273 | 0.183019 | 33.82 |
| 2047   | 2017 | -0.37 | 0.02 | 0.693147 | 0.48045301 | 22.84876 | 0.099929 | 24.48 |
| 2197   | 2017 | 0.943 | 0.02 | 0.693147 | 0.48045301 | 22.39496 | 0.010473 | 20.32 |
| 2334   | 2017 | 1.263 | 0.02 | 0.693147 | 0.48045301 | 21.89236 | 0.108504 | 17.66 |
| 2106   | 2017 | -0.5  | 0.02 | 0.693147 | 0.48045301 | 22.26482 | 0.039185 | 20.84 |
| 2421   | 2017 | 0.048 | 0.02 | 0.693147 | 0.48045301 | 22.42021 | 0.102082 | 18.81 |
| 2816   | 2017 | -0.51 | 0.02 | 0.693147 | 0.48045301 | 20.39021 | 0.030885 | 12.43 |
| 600525 | 2017 | 0.372 | 0.02 | 0.693147 | 0.48045301 | 23.74551 | 0.147776 | 7.84  |
| 49     | 2017 | -0.27 | 0.02 | 0.693147 | 0.48045301 | 22.75392 | 0.2004   | 45.23 |
| 26     | 2017 | -0.35 | 0.02 | 0.693147 | 0.48045301 | 21.99857 | 0.057787 | 37.15 |
| 2816   | 2017 | -0.51 | 0.02 | 0.693147 | 0.48045301 | 20.39021 | 0.030885 | 12.43 |
| 2008   | 2017 | 0.566 | 0.02 | 0.693147 | 0.48045301 | 23.36965 | 0.234874 | 15.46 |
| 2197   | 2017 | 0.048 | 0.02 | 0.693147 | 0.48045301 | 22.39496 | 0.010473 | 20.32 |
| 2815   | 2017 | 0.738 | 0.02 | 0.693147 | 0.48045301 | 21.62984 | 0.175815 | 60.63 |
| 2583   | 2017 | 1.204 | 0.02 | 0.693147 | 0.48045301 | 23.3573  | 0.043335 | 51.43 |
| 39     | 2017 | -0.62 | 0.02 | 0.693147 | 0.48045301 | 25.59544 | 0.005707 | 58.02 |
| 49     | 2017 | -0.18 | 0.02 | 0.693147 | 0.48045301 | 22.75392 | 0.2004   | 45.23 |
| 2137   | 2017 | -0.71 | 0.02 | 0.693147 | 0.48045301 | 21.45448 | 0.045266 | 37.99 |
| 2218   | 2017 | 0.332 | 0.02 | 0.693147 | 0.48045301 | 22.47249 | 0.057583 | 32.55 |
| 2121   | 2017 | 0.405 | 0.02 | 0.693147 | 0.48045301 | 23.45338 | 0.081888 | 43.14 |
| 300303 | 2017 | -0.36 | 0.02 | 0.693147 | 0.48045301 | 21.92271 | 0.024323 | 22.92 |

|        |      |       |      |          |            |          |          |       |
|--------|------|-------|------|----------|------------|----------|----------|-------|
| 2594   | 2017 | -0.19 | 0.02 | 0.693147 | 0.48045301 | 25.74206 | 0.082007 | 25.26 |
| 9      | 2017 | -0.72 | 0.02 | 0.693147 | 0.48045301 | 24.02315 | -0.0567  | 11.91 |
| 300112 | 2017 | -0.28 | 0.02 | 0.693147 | 0.48045301 | 20.9023  | 0.048673 | 21.76 |
| 39     | 2017 | -0.84 | 0.02 | 0.693147 | 0.48045301 | 25.59544 | 0.005707 | 58.02 |
| 2139   | 2017 | 0.126 | 0.02 | 0.693147 | 0.48045301 | 21.88924 | 0.108329 | 23.24 |
| 600525 | 2017 | 0.873 | 0.02 | 0.693147 | 0.48045301 | 23.74551 | 0.147776 | 7.84  |
| 39     | 2017 | -0.38 | 0.02 | 0.693147 | 0.48045301 | 25.59544 | 0.005707 | 58.02 |
| 2672   | 2017 | -0.35 | 0.02 | 0.693147 | 0.48045301 | 22.94682 | 0.128037 | 22.53 |
| 63     | 2017 | 1.204 | 0.02 | 0.693147 | 0.48045301 | 25.69282 | 0.212929 | 30.34 |
| 32     | 2017 | 0.117 | 0.02 | 0.693147 | 0.48045301 | 21.37941 | 0.008329 | 49.18 |
| 9      | 2017 | -0.72 | 0.02 | 0.693147 | 0.48045301 | 24.02315 | -0.0567  | 11.91 |
| 34     | 2017 | -0.31 | 0.02 | 0.693147 | 0.48045301 | 23.91264 | 0.215374 | 23.66 |
| 66     | 2017 | -0.17 | 0.02 | 0.693147 | 0.48045301 | 23.44467 | 0.05082  | 40.91 |
| 2356   | 2017 | -0.65 | 0.02 | 0.693147 | 0.48045301 | 22.66988 | 0.10405  | 49.28 |
| 9      | 2017 | -0.72 | 0.02 | 0.693147 | 0.48045301 | 24.02315 | -0.0567  | 11.91 |
| 19     | 2017 | 0.542 | 0.02 | 0.693147 | 0.48045301 | 21.09328 | -0.0636  | 19.09 |
| 2429   | 2017 | -0.66 | 0.02 | 0.693147 | 0.48045301 | 23.53385 | 0.073162 | 54.5  |
| 2577   | 2017 | -0.53 | 0.02 | 0.693147 | 0.48045301 | 20.98663 | 0.009817 | 62.35 |
| 2654   | 2017 | -0.37 | 0.02 | 0.693147 | 0.48045301 | 22.18356 | 0.053409 | 16.73 |
| 2594   | 2017 | -0.47 | 0.02 | 0.693147 | 0.48045301 | 25.74206 | 0.082007 | 25.26 |
| 2672   | 2017 | -0.62 | 0.02 | 0.693147 | 0.48045301 | 22.94682 | 0.128037 | 22.53 |
| 2121   | 2017 | 0.552 | 0.02 | 0.693147 | 0.48045301 | 23.45338 | 0.081888 | 43.14 |
| 2130   | 2017 | -0.18 | 0.02 | 0.693147 | 0.48045301 | 22.55268 | 0.060011 | 27.47 |
| 9      | 2017 | -0.55 | 0.02 | 0.693147 | 0.48045301 | 24.02315 | -0.0567  | 11.91 |
| 2551   | 2017 | 0.696 | 0.02 | 0.693147 | 0.48045301 | 22.1843  | 0.070767 | 39.58 |
| 2456   | 2017 | 0.714 | 0.02 | 0.693147 | 0.48045301 | 24.15202 | 0.089338 | 19.29 |
| 19     | 2017 | 0.542 | 0.02 | 0.693147 | 0.48045301 | 20.79129 | -0.0636  | 19.09 |
| 600525 | 2017 | 0.482 | 0.02 | 0.693147 | 0.48045301 | 23.74551 | 0.147776 | 7.84  |
| 2138   | 2017 | 0.309 | 0.02 | 0.693147 | 0.48045301 | 22.20931 | 0.084934 | 15.59 |
| 2436   | 2017 | 0.345 | 0.02 | 0.693147 | 0.48045301 | 22.21287 | 0.077427 | 19.76 |
| 78     | 2017 | -0.39 | 0.02 | 0.693147 | 0.48045301 | 24.15287 | 0.21147  | 45.96 |
| 300162 | 2017 | -0.5  | 0.02 | 0.693147 | 0.48045301 | 21.02774 | 0.019384 | 22.54 |
| 300162 | 2017 | -0.06 | 0.02 | 0.693147 | 0.48045301 | 21.02774 | 0.019384 | 22.54 |
| 300162 | 2017 | -0.5  | 0.02 | 0.693147 | 0.48045301 | 21.02774 | 0.019384 | 22.54 |
| 2163   | 2017 | -0.43 | 0.02 | 0.693147 | 0.48045301 | 22.63224 | -0.07214 | 13.74 |
| 66     | 2017 | 0.126 | 0.02 | 0.693147 | 0.48045301 | 23.44467 | 0.05082  | 40.91 |
| 300077 | 2017 | 1.687 | 0.02 | 0.693147 | 0.48045301 | 21.81515 | -0.19198 | 7.84  |
| 2161   | 2017 | 0.635 | 0.02 | 0.693147 | 0.48045301 | 21.54717 | 0.001497 | 24.39 |
| 2052   | 2017 | 0.411 | 0.02 | 0.693147 | 0.48045301 | 21.31936 | 0.009644 | 16.5  |
| 39     | 2017 | -0.51 | 0.02 | 0.693147 | 0.48045301 | 25.59544 | 0.005707 | 58.02 |
| 2139   | 2017 | 0.198 | 0.02 | 0.693147 | 0.48045301 | 21.88924 | 0.108329 | 23.24 |
| 2227   | 2017 | 0.264 | 0.02 | 0.693147 | 0.48045301 | 20.79148 | 0.018525 | 57.57 |
| 2170   | 2017 | -0.54 | 0.02 | 0.693147 | 0.48045301 | 22.25015 | -0.05874 | 28.98 |
| 2356   | 2017 | -0.66 | 0.02 | 0.693147 | 0.48045301 | 22.66988 | 0.10405  | 49.28 |
| 2256   | 2017 | -0.17 | 0.02 | 0.693147 | 0.48045301 | 21.88973 | 0.065891 | 26.67 |
| 300538 | 2017 | -0.16 | 0.02 | 0.693147 | 0.48045301 | 20.10336 | 0.046382 | 25.54 |
| 39     | 2017 | -0.4  | 0.02 | 0.693147 | 0.48045301 | 25.59544 | 0.005707 | 58.02 |
| 2314   | 2017 | -0.93 | 0.02 | 0.693147 | 0.48045301 | 23.97586 | 0.088439 | 50.03 |
| 300333 | 2017 | 2.597 | 0.02 | 0.693147 | 0.48045301 | 20.6092  | 0.042243 | 22.23 |
| 2482   | 2017 | 0.056 | 0.02 | 0.693147 | 0.48045301 | 23.48734 | 0.096247 | 39.71 |
| 2781   | 2017 | 0.765 | 0.02 | 0.693147 | 0.48045301 | 22.19136 | 0.076614 | 42.3  |
| 300532 | 2017 | 0.601 | 0.02 | 0.693147 | 0.48045301 | 20.9863  | 0.118284 | 46.12 |
| 300457 | 2017 | -0.08 | 0.02 | 0.693147 | 0.48045301 | 21.65476 | 0.180165 | 42.07 |
| 2055   | 2017 | 0.24  | 0.02 | 0.693147 | 0.48045301 | 22.98371 | 0.052418 | 29.92 |

|        |      |       |      |          |            |          |          |       |
|--------|------|-------|------|----------|------------|----------|----------|-------|
| 2341   | 2017 | -0.07 | 0.02 | 0.693147 | 0.48045301 | 22.59578 | 0.049358 | 25.59 |
| 300545 | 2017 | 0.436 | 0.02 | 0.693147 | 0.48045301 | 20.76294 | 0.110794 | 64.05 |
| 300077 | 2017 | 1.687 | 0.02 | 0.693147 | 0.48045301 | 21.81515 | -0.19198 | 7.84  |
| 300115 | 2017 | -0.27 | 0.02 | 0.693147 | 0.48045301 | 23.03417 | 0.126642 | 42.72 |
| 2654   | 2017 | -0.54 | 0.02 | 0.693147 | 0.48045301 | 22.18356 | 0.053409 | 16.73 |
| 600380 | 2017 | 0.828 | 0.02 | 0.693147 | 0.48045301 | 23.82388 | 0.302158 | 47.17 |
| 2139   | 2017 | 0.189 | 0.02 | 0.693147 | 0.48045301 | 21.88924 | 0.108329 | 23.24 |
| 300319 | 2017 | -0.68 | 0.02 | 0.693147 | 0.48045301 | 21.85769 | -0.18104 | 27.06 |
| 2672   | 2017 | -0.35 | 0.02 | 0.693147 | 0.48045301 | 22.94682 | 0.128037 | 22.53 |
| 300457 | 2017 | 0.367 | 0.02 | 0.693147 | 0.48045301 | 21.87111 | 0.180165 | 42.07 |
| 39     | 2017 | -0.64 | 0.02 | 0.693147 | 0.48045301 | 25.59544 | 0.005707 | 58.02 |
| 2055   | 2017 | -0.17 | 0.02 | 0.693147 | 0.48045301 | 22.98371 | 0.052418 | 29.92 |
| 40     | 2017 | -0.01 | 0.02 | 0.693147 | 0.48045301 | 24.08723 | 0.04671  | 30.98 |
| 66     | 2017 | -0.17 | 0.02 | 0.693147 | 0.48045301 | 23.44467 | 0.05082  | 40.91 |
| 2106   | 2017 | -0.5  | 0.02 | 0.693147 | 0.48045301 | 22.26482 | 0.039185 | 20.84 |
| 2766   | 2017 | 0.61  | 0.02 | 0.693147 | 0.48045301 | 22.2007  | -0.01973 | 45.31 |
| 2303   | 2017 | -0.67 | 0.02 | 0.693147 | 0.48045301 | 22.5035  | 0.077393 | 43.09 |
| 48     | 2017 | -0.77 | 0.02 | 0.693147 | 0.48045301 | 22.08547 | -0.19578 | 31.65 |
| 2402   | 2017 | 0.109 | 0.02 | 0.693147 | 0.48045301 | 21.38511 | 0.136117 | 17.57 |
| 2359   | 2017 | -0.53 | 0.02 | 0.693147 | 0.48045301 | 23.25736 | 0.035655 | 35.15 |
| 555    | 2017 | 0.937 | 0.02 | 0.693147 | 0.48045301 | 23.09536 | 0.064195 | 40.43 |
| 300546 | 2017 | 0.454 | 0.02 | 0.693147 | 0.48045301 | 20.63954 | 0.125052 | 39.25 |
| 300206 | 2017 | 0.601 | 0.02 | 0.693147 | 0.48045301 | 21.07889 | 0.030303 | 20.86 |
| 2402   | 2017 | -0.12 | 0.02 | 0.693147 | 0.48045301 | 21.38511 | 0.136117 | 17.57 |
| 999    | 2017 | -0.81 | 0.02 | 0.693147 | 0.48045301 | 23.508   | 0.131014 | 63.6  |
| 39     | 2017 | -0.64 | 0.02 | 0.693147 | 0.48045301 | 25.59544 | 0.005707 | 58.02 |
| 16     | 2017 | -0.31 | 0.02 | 0.693147 | 0.48045301 | 23.88276 | 0.302158 | 21.75 |
| 300134 | 2017 | 0.878 | 0.02 | 0.693147 | 0.48045301 | 22.67964 | -0.098   | 43.39 |
| 40     | 2017 | -0.01 | 0.02 | 0.693147 | 0.48045301 | 24.08723 | 0.04671  | 30.98 |
| 2548   | 2017 | 0.113 | 0.02 | 0.693147 | 0.48045301 | 21.97989 | 0.056841 | 39.65 |
| 2138   | 2017 | 0.309 | 0.02 | 0.693147 | 0.48045301 | 22.28526 | 0.084934 | 15.59 |
| 2313   | 2017 | 0.212 | 0.02 | 0.693147 | 0.48045301 | 22.32659 | 0.048983 | 24.69 |
| 2672   | 2017 | 0.044 | 0.02 | 0.693147 | 0.48045301 | 22.94682 | 0.128037 | 22.53 |
| 300301 | 2017 | -0.58 | 0.02 | 0.693147 | 0.48045301 | 22.05966 | 0.040474 | 21.02 |
| 2215   | 2017 | 0.511 | 0.02 | 0.693147 | 0.48045301 | 22.23673 | 0.142671 | 27.02 |
| 32     | 2017 | -0.18 | 0.02 | 0.693147 | 0.48045301 | 21.37941 | 0.008329 | 49.18 |
| 300252 | 2017 | -0.16 | 0.02 | 0.693147 | 0.48045301 | 22.49488 | 0.062486 | 34.12 |
| 50     | 2017 | 0.651 | 0.02 | 0.693147 | 0.48045301 | 24.1128  | 0.055766 | 20.81 |
| 2594   | 2017 | -0.47 | 0.02 | 0.693147 | 0.48045301 | 25.74206 | 0.082007 | 25.26 |
| 2681   | 2017 | -0.28 | 0.02 | 0.693147 | 0.48045301 | 22.89595 | 0.07212  | 37.7  |
| 300136 | 2017 | 0.114 | 0.02 | 0.693147 | 0.48045301 | 22.39722 | 0.302158 | 20.14 |
| 2475   | 2017 | -0.29 | 0.02 | 0.693147 | 0.48045301 | 24.01487 | 0.125514 | 48.17 |
| 300136 | 2017 | 0.154 | 0.02 | 0.693147 | 0.48045301 | 22.27999 | 0.302158 | 20.14 |
| 600525 | 2017 | 0.614 | 0.02 | 0.693147 | 0.48045301 | 23.74551 | 0.147776 | 7.84  |
| 2351   | 2017 | -0.05 | 0.02 | 0.693147 | 0.48045301 | 21.42162 | 0.064347 | 31.7  |
| 300136 | 2017 | 0.176 | 0.02 | 0.693147 | 0.48045301 | 22.39722 | 0.302158 | 20.14 |
| 2191   | 2017 | -0.59 | 0.02 | 0.693147 | 0.48045301 | 22.81806 | 0.100535 | 30.97 |
| 300207 | 2017 | -0.44 | 0.02 | 0.693147 | 0.48045301 | 23.29273 | 0.183019 | 33.82 |
| 2243   | 2017 | 0.104 | 0.02 | 0.693147 | 0.48045301 | 21.37071 | 0.033161 | 51.52 |
| 26     | 2017 | -0.67 | 0.02 | 0.693147 | 0.48045301 | 21.99857 | 0.057787 | 37.15 |
| 2334   | 2017 | 0.27  | 0.02 | 0.693147 | 0.48045301 | 21.89236 | 0.108504 | 17.66 |
| 2724   | 2017 | -0.23 | 0.02 | 0.693147 | 0.48045301 | 21.44693 | 0.086153 | 70.42 |
| 2008   | 2017 | 0.024 | 0.02 | 0.693147 | 0.48045301 | 23.36965 | 0.234874 | 15.46 |
| 2733   | 2017 | -0.65 | 0.02 | 0.693147 | 0.48045301 | 21.9825  | 0.015271 | 36.26 |

|        |      |       |      |          |            |          |          |       |
|--------|------|-------|------|----------|------------|----------|----------|-------|
| 600380 | 2017 | -0.06 | 0.02 | 0.693147 | 0.48045301 | 23.82388 | 0.302158 | 47.17 |
| 39     | 2017 | -0.55 | 0.02 | 0.693147 | 0.48045301 | 25.59544 | 0.005707 | 58.02 |
| 300134 | 2017 | -0.1  | 0.02 | 0.693147 | 0.48045301 | 22.67964 | -0.098   | 43.39 |
| 70     | 2017 | -0.26 | 0.02 | 0.693147 | 0.48045301 | 22.52944 | 0.05761  | 39.18 |
| 2008   | 2017 | 0.365 | 0.02 | 0.693147 | 0.48045301 | 23.36965 | 0.234874 | 15.46 |
| 2672   | 2017 | -0.62 | 0.02 | 0.693147 | 0.48045301 | 22.94682 | 0.128037 | 22.53 |
| 300134 | 2017 | 0.363 | 0.02 | 0.693147 | 0.48045301 | 22.67964 | -0.098   | 43.39 |
| 300134 | 2017 | -0.13 | 0.02 | 0.693147 | 0.48045301 | 22.67964 | -0.098   | 43.39 |
| 300232 | 2017 | -0.55 | 0.02 | 0.693147 | 0.48045301 | 22.31078 | 0.140586 | 41.38 |
| 50     | 2017 | 0.743 | 0.02 | 0.693147 | 0.48045301 | 24.1128  | 0.055766 | 20.81 |
| 2837   | 2017 | 0.205 | 0.02 | 0.693147 | 0.48045301 | 20.95261 | 0.129885 | 28.23 |
| 2475   | 2017 | -0.13 | 0.02 | 0.693147 | 0.48045301 | 24.01487 | 0.125514 | 48.17 |
| 2121   | 2017 | 0.405 | 0.02 | 0.693147 | 0.48045301 | 23.45338 | 0.081888 | 43.14 |
| 300303 | 2017 | 0.017 | 0.02 | 0.693147 | 0.48045301 | 21.92271 | 0.024323 | 22.92 |
| 300134 | 2017 | 0.363 | 0.02 | 0.693147 | 0.48045301 | 22.67964 | -0.098   | 43.39 |
| 68     | 2017 | 0.685 | 0.02 | 0.693147 | 0.48045301 | 21.75421 | 0.063981 | 26.43 |
| 600525 | 2017 | 0.372 | 0.02 | 0.693147 | 0.48045301 | 23.74551 | 0.147776 | 7.84  |
| 300227 | 2017 | -0.07 | 0.02 | 0.693147 | 0.48045301 | 20.78301 | 0.082602 | 18.86 |
| 2618   | 2017 | 1.37  | 0.02 | 0.693147 | 0.48045301 | 21.67523 | 0.014989 | 28.03 |
| 2138   | 2017 | -0.14 | 0.02 | 0.693147 | 0.48045301 | 22.28526 | 0.084934 | 15.59 |
| 300130 | 2017 | 0.658 | 0.02 | 0.693147 | 0.48045301 | 21.97363 | 0.035605 | 28.87 |
| 2340   | 2017 | 0.111 | 0.02 | 0.693147 | 0.48045301 | 23.82563 | 0.082629 | 12.44 |
| 2735   | 2017 | -0.22 | 0.02 | 0.693147 | 0.48045301 | 20.10336 | 0.07261  | 51.51 |
| 39     | 2017 | -0.84 | 0.02 | 0.693147 | 0.48045301 | 25.59544 | 0.005707 | 58.02 |
| 300130 | 2017 | 0.235 | 0.02 | 0.693147 | 0.48045301 | 22.08278 | 0.035605 | 28.87 |
| 300207 | 2017 | 0.884 | 0.02 | 0.693147 | 0.48045301 | 23.29273 | 0.183019 | 33.82 |
| 2191   | 2017 | -0.15 | 0.02 | 0.693147 | 0.48045301 | 22.81806 | 0.100535 | 30.97 |
| 2609   | 2017 | 0.208 | 0.02 | 0.693147 | 0.48045301 | 21.6906  | 0.093088 | 35.37 |
| 2781   | 2017 | 0.008 | 0.02 | 0.693147 | 0.48045301 | 22.19136 | 0.076614 | 42.3  |
| 300162 | 2017 | 0.114 | 0.02 | 0.693147 | 0.48045301 | 20.94801 | 0.019384 | 22.54 |
| 49     | 2017 | -0.64 | 0.02 | 0.693147 | 0.48045301 | 22.75392 | 0.2004   | 45.23 |
| 300130 | 2017 | 0.235 | 0.02 | 0.693147 | 0.48045301 | 22.08278 | 0.035605 | 28.87 |
| 300154 | 2017 | -0.04 | 0.02 | 0.693147 | 0.48045301 | 21.34753 | 0.052606 | 39.52 |
| 2475   | 2017 | -0.5  | 0.02 | 0.693147 | 0.48045301 | 23.15511 | 0.125514 | 48.17 |
| 2672   | 2017 | -0.35 | 0.02 | 0.693147 | 0.48045301 | 22.94682 | 0.128037 | 22.53 |
| 2008   | 2017 | 0.041 | 0.02 | 0.693147 | 0.48045301 | 23.36965 | 0.234874 | 15.46 |
| 1979   | 2017 | -0.99 | 0.02 | 0.693147 | 0.48045301 | 25.74206 | 0.161769 | 66.1  |
| 300037 | 2017 | 0.469 | 0.02 | 0.693147 | 0.48045301 | 22.03136 | 0.116608 | 15.09 |
| 2587   | 2017 | -0.26 | 0.02 | 0.693147 | 0.48045301 | 21.30742 | 0.113127 | 27.72 |
| 2314   | 2017 | -0.93 | 0.02 | 0.693147 | 0.48045301 | 23.97586 | 0.088439 | 50.03 |
| 300112 | 2017 | -0.21 | 0.02 | 0.693147 | 0.48045301 | 20.9023  | 0.048673 | 21.76 |
| 603160 | 2017 | 1.94  | 0.02 | 0.693147 | 0.48045301 | 22.20894 | 0.254448 | 48.41 |
| 300115 | 2017 | 0.449 | 0.02 | 0.693147 | 0.48045301 | 23.03417 | 0.126642 | 42.72 |
| 2475   | 2017 | -0.19 | 0.02 | 0.693147 | 0.48045301 | 24.01487 | 0.125514 | 48.17 |
| 2672   | 2017 | 0.044 | 0.02 | 0.693147 | 0.48045301 | 22.94682 | 0.128037 | 22.53 |
| 300124 | 2017 | 0.484 | 0.02 | 0.693147 | 0.48045301 | 22.92571 | 0.190616 | 18.63 |
| 300124 | 2017 | 0.484 | 0.02 | 0.693147 | 0.48045301 | 22.92571 | 0.190616 | 18.63 |
| 2654   | 2017 | -0.28 | 0.02 | 0.693147 | 0.48045301 | 22.18356 | 0.053409 | 16.73 |
| 300124 | 2017 | 0.506 | 0.02 | 0.693147 | 0.48045301 | 22.92571 | 0.190616 | 18.63 |
| 2823   | 2017 | 0.136 | 0.02 | 0.693147 | 0.48045301 | 21.39418 | 0.134302 | 32.17 |
| 9      | 2017 | -0.21 | 0.02 | 0.693147 | 0.48045301 | 24.02315 | -0.0567  | 11.91 |
| 300556 | 2017 | 0.501 | 0.02 | 0.693147 | 0.48045301 | 20.18637 | 0.032428 | 30.06 |
| 2781   | 2017 | 0.765 | 0.02 | 0.693147 | 0.48045301 | 22.19136 | 0.076614 | 42.3  |
| 300124 | 2017 | 0.484 | 0.02 | 0.693147 | 0.48045301 | 22.92571 | 0.190616 | 18.63 |

|        |      |       |      |          |            |          |          |       |
|--------|------|-------|------|----------|------------|----------|----------|-------|
| 300154 | 2017 | 0.174 | 0.02 | 0.693147 | 0.48045301 | 21.34753 | 0.052606 | 39.52 |
| 600525 | 2017 | 1.144 | 0.02 | 0.693147 | 0.48045301 | 23.13532 | 0.147776 | 7.84  |
| 300154 | 2017 | -0.44 | 0.02 | 0.693147 | 0.48045301 | 21.34753 | 0.052606 | 39.52 |
| 34     | 2017 | -0.31 | 0.02 | 0.693147 | 0.48045301 | 23.91264 | 0.008017 | 23.66 |
| 300531 | 2017 | 0.698 | 0.02 | 0.693147 | 0.48045301 | 20.55932 | 0.088123 | 50.02 |
| 2334   | 2017 | 0.27  | 0.02 | 0.693147 | 0.48045301 | 21.89236 | 0.108504 | 17.66 |
| 2340   | 2017 | -0.55 | 0.02 | 0.693147 | 0.48045301 | 23.82563 | 0.082629 | 12.44 |
| 2313   | 2017 | -0.23 | 0.02 | 0.693147 | 0.48045301 | 22.32659 | 0.048983 | 24.69 |
| 2130   | 2017 | 0.63  | 0.02 | 0.693147 | 0.48045301 | 22.55268 | 0.060011 | 27.47 |
| 300134 | 2017 | 0.363 | 0.02 | 0.693147 | 0.48045301 | 22.67964 | -0.098   | 43.39 |
| 2786   | 2017 | -0.41 | 0.02 | 0.693147 | 0.48045301 | 22.07202 | 0.056555 | 35.74 |
| 600525 | 2017 | 0.009 | 0.02 | 0.693147 | 0.48045301 | 23.74551 | 0.147776 | 7.84  |
| 66     | 2017 | 0.534 | 0.02 | 0.693147 | 0.48045301 | 23.44467 | 0.05082  | 40.91 |
| 300115 | 2017 | 0.396 | 0.02 | 0.693147 | 0.48045301 | 23.03417 | 0.126642 | 42.72 |
| 2137   | 2017 | -0.71 | 0.02 | 0.693147 | 0.48045301 | 21.45448 | 0.045266 | 37.99 |
| 32     | 2017 | 0.558 | 0.02 | 0.693147 | 0.48045301 | 21.37941 | -0.00952 | 49.18 |
| 300115 | 2017 | 0.514 | 0.02 | 0.693147 | 0.48045301 | 23.03417 | 0.126642 | 42.72 |
| 603118 | 2017 | 0.772 | 0.02 | 0.693147 | 0.48045301 | 22.70093 | 0.022881 | 24.98 |
| 16     | 2017 | -0.42 | 0.02 | 0.693147 | 0.48045301 | 23.88276 | 0.302158 | 21.75 |
| 2197   | 2017 | -0.28 | 0.02 | 0.693147 | 0.48045301 | 22.34626 | 0.010473 | 20.32 |
| 300264 | 2017 | 2.389 | 0.02 | 0.693147 | 0.48045301 | 20.62967 | -0.14594 | 29.5  |
| 300136 | 2017 | -0.33 | 0.02 | 0.693147 | 0.48045301 | 22.39722 | 0.302158 | 20.14 |
| 300115 | 2017 | 0.578 | 0.02 | 0.693147 | 0.48045301 | 23.03417 | 0.126642 | 42.72 |
| 2482   | 2017 | -0.01 | 0.02 | 0.693147 | 0.48045301 | 23.48734 | 0.096247 | 39.71 |
| 2594   | 2017 | -0.47 | 0.02 | 0.693147 | 0.48045301 | 25.74206 | 0.082007 | 25.26 |
| 2735   | 2017 | -0.88 | 0.02 | 0.693147 | 0.48045301 | 20.10336 | 0.07261  | 51.51 |
| 300543 | 2017 | -0.61 | 0.02 | 0.693147 | 0.48045301 | 20.82005 | 0.122584 | 36.12 |
| 2055   | 2017 | -0.56 | 0.02 | 0.693147 | 0.48045301 | 22.98371 | 0.052418 | 29.92 |
| 300531 | 2017 | 1.782 | 0.02 | 0.693147 | 0.48045301 | 20.55932 | 0.088123 | 50.02 |
| 19     | 2017 | 0.542 | 0.02 | 0.693147 | 0.48045301 | 20.79129 | -0.0636  | 19.09 |
| 300077 | 2017 | 1.687 | 0.02 | 0.693147 | 0.48045301 | 21.81515 | -0.19198 | 7.84  |
| 2130   | 2017 | 0.63  | 0.02 | 0.693147 | 0.48045301 | 22.55268 | 0.060011 | 27.47 |
| 39     | 2017 | -0.51 | 0.02 | 0.693147 | 0.48045301 | 25.59544 | 0.005707 | 58.02 |
| 300269 | 2017 | -0.31 | 0.02 | 0.693147 | 0.48045301 | 22.75694 | 0.021003 | 18.81 |
| 63     | 2017 | 1.578 | 0.02 | 0.693147 | 0.48045301 | 25.69282 | 0.212929 | 30.34 |
| 300162 | 2017 | -0.5  | 0.02 | 0.693147 | 0.48045301 | 21.02774 | 0.019384 | 22.54 |
| 999    | 2017 | 0.069 | 0.02 | 0.693147 | 0.48045301 | 23.508   | 0.131014 | 63.6  |
| 2168   | 2017 | 0.145 | 0.02 | 0.693147 | 0.48045301 | 21.89703 | -0.07608 | 10.02 |
| 39     | 2017 | -0.55 | 0.02 | 0.693147 | 0.48045301 | 25.59544 | 0.005707 | 58.02 |
| 2837   | 2017 | 0.186 | 0.02 | 0.693147 | 0.48045301 | 20.95261 | 0.129885 | 28.23 |
| 63     | 2017 | 1.023 | 0.02 | 0.693147 | 0.48045301 | 25.69282 | 0.212929 | 30.34 |
| 39     | 2017 | -0.84 | 0.02 | 0.693147 | 0.48045301 | 24.11705 | 0.005707 | 58.02 |
| 2170   | 2017 | 0.781 | 0.02 | 0.693147 | 0.48045301 | 22.25015 | -0.05874 | 28.98 |
| 2594   | 2017 | -0.47 | 0.02 | 0.693147 | 0.48045301 | 25.74206 | 0.082007 | 25.26 |
| 300468 | 2017 | 2.136 | 0.02 | 0.693147 | 0.48045301 | 20.87468 | 0.09287  | 25.71 |
| 39     | 2017 | -0.55 | 0.02 | 0.693147 | 0.48045301 | 25.59544 | 0.005707 | 58.02 |
| 300207 | 2017 | -0.04 | 0.02 | 0.693147 | 0.48045301 | 23.29273 | 0.183019 | 33.82 |
| 300112 | 2017 | -0.28 | 0.02 | 0.693147 | 0.48045301 | 20.9023  | 0.048673 | 21.76 |
| 300112 | 2017 | -0.28 | 0.02 | 0.693147 | 0.48045301 | 20.9023  | 0.048673 | 21.76 |
| 2340   | 2017 | -0.16 | 0.02 | 0.693147 | 0.48045301 | 23.82563 | 0.082629 | 12.44 |
| 2161   | 2017 | 0.394 | 0.02 | 0.693147 | 0.48045301 | 21.54717 | 0.001497 | 24.39 |
| 2256   | 2017 | -0.17 | 0.02 | 0.693147 | 0.48045301 | 22.07361 | 0.065891 | 26.67 |
| 2594   | 2017 | 0.002 | 0.02 | 0.693147 | 0.48045301 | 25.74206 | 0.082007 | 25.26 |
| 50     | 2017 | 0.707 | 0.02 | 0.693147 | 0.48045301 | 24.1128  | 0.003971 | 20.81 |

|        |      |       |      |          |            |          |          |       |
|--------|------|-------|------|----------|------------|----------|----------|-------|
| 12     | 2017 | -0.41 | 0.02 | 0.693147 | 0.48045301 | 23.69547 | 0.064394 | 14.84 |
| 2831   | 2017 | -0.76 | 0.02 | 0.693147 | 0.48045301 | 22.91861 | 0.185639 | 52.75 |
| 300115 | 2017 | 0.54  | 0.02 | 0.693147 | 0.48045301 | 23.03417 | 0.126642 | 42.72 |
| 2316   | 2017 | 0.851 | 0.02 | 0.693147 | 0.48045301 | 21.83763 | 0.046491 | 19.84 |
| 600380 | 2017 | 0.497 | 0.02 | 0.693147 | 0.48045301 | 23.82388 | 0.302158 | 47.17 |
| 300576 | 2017 | 0.514 | 0.02 | 0.693147 | 0.48045301 | 20.10336 | 0.09041  | 13.6  |
| 300012 | 2017 | -0.42 | 0.02 | 0.693147 | 0.48045301 | 21.9807  | 0.054239 | 11.72 |
| 300531 | 2017 | 0.752 | 0.02 | 0.693147 | 0.48045301 | 20.54699 | 0.088123 | 50.02 |
| 2388   | 2017 | -0.54 | 0.02 | 0.693147 | 0.48045301 | 21.25864 | 0.053824 | 46.42 |
| 2130   | 2017 | -0.18 | 0.02 | 0.693147 | 0.48045301 | 22.55268 | 0.060011 | 27.47 |
| 2341   | 2017 | -0.25 | 0.02 | 0.693147 | 0.48045301 | 22.59578 | 0.049358 | 25.59 |
| 2782   | 2017 | -0.68 | 0.02 | 0.693147 | 0.48045301 | 20.86025 | 0.068986 | 35.56 |
| 300077 | 2017 | 1.687 | 0.02 | 0.693147 | 0.48045301 | 21.78775 | -0.19198 | 7.84  |
| 300151 | 2017 | -0.53 | 0.02 | 0.693147 | 0.48045301 | 20.69812 | 0.040844 | 45.86 |
| 2654   | 2017 | -0.54 | 0.02 | 0.693147 | 0.48045301 | 21.78234 | 0.053409 | 16.73 |
| 300124 | 2017 | 0.497 | 0.02 | 0.693147 | 0.48045301 | 22.92571 | 0.190616 | 18.63 |
| 39     | 2017 | -0.55 | 0.02 | 0.693147 | 0.48045301 | 25.59544 | 0.005707 | 58.02 |
| 2303   | 2017 | -0.34 | 0.02 | 0.693147 | 0.48045301 | 22.5035  | 0.077393 | 43.09 |
| 2313   | 2017 | 0.433 | 0.02 | 0.693147 | 0.48045301 | 22.32659 | 0.048983 | 24.69 |
| 27     | 2017 | 0.385 | 0.02 | 0.693147 | 0.48045301 | 25.07007 | 0.034182 | 47.82 |
| 2609   | 2017 | 0.208 | 0.02 | 0.693147 | 0.48045301 | 21.6906  | 0.093088 | 35.37 |
| 39     | 2017 | -0.67 | 0.02 | 0.693147 | 0.48045301 | 25.59544 | 0.005707 | 58.02 |
| 2594   | 2017 | -0.16 | 0.02 | 0.693147 | 0.48045301 | 25.74206 | 0.082007 | 25.26 |
| 2577   | 2017 | -0.18 | 0.02 | 0.693147 | 0.48045301 | 20.98663 | 0.009817 | 62.35 |
| 2215   | 2017 | 0.579 | 0.02 | 0.693147 | 0.48045301 | 22.23673 | 0.142671 | 27.02 |
| 2594   | 2017 | -0.47 | 0.02 | 0.693147 | 0.48045301 | 25.74206 | 0.082007 | 25.26 |
| 2781   | 2017 | 0.198 | 0.02 | 0.693147 | 0.48045301 | 22.09155 | 0.076614 | 42.3  |
| 300545 | 2017 | 0.436 | 0.02 | 0.693147 | 0.48045301 | 20.76084 | 0.110794 | 64.05 |
| 300134 | 2017 | 0.694 | 0.02 | 0.693147 | 0.48045301 | 22.67964 | -0.098   | 43.39 |
| 300227 | 2017 | 0.085 | 0.02 | 0.693147 | 0.48045301 | 20.43973 | 0.082602 | 18.86 |
| 2359   | 2017 | -0.53 | 0.02 | 0.693147 | 0.48045301 | 23.25736 | 0.035655 | 35.15 |
| 39     | 2017 | -0.84 | 0.02 | 0.693147 | 0.48045301 | 25.59544 | 0.005707 | 58.02 |
| 300047 | 2017 | 1.248 | 0.02 | 0.693147 | 0.48045301 | 22.032   | 0.061558 | 10.15 |
| 2130   | 2017 | -0.14 | 0.02 | 0.693147 | 0.48045301 | 22.55268 | 0.060011 | 27.47 |
| 300037 | 2017 | 1.008 | 0.02 | 0.693147 | 0.48045301 | 22.03136 | 0.116608 | 15.09 |
| 300085 | 2017 | 0.661 | 0.02 | 0.693147 | 0.48045301 | 21.52009 | 0.018351 | 18.98 |
| 300044 | 2017 | 0.452 | 0.02 | 0.693147 | 0.48045301 | 22.04703 | 0.077296 | 14.65 |
| 2334   | 2017 | 0.535 | 0.02 | 0.693147 | 0.48045301 | 21.89236 | 0.108504 | 17.66 |
| 300131 | 2017 | -0.69 | 0.02 | 0.693147 | 0.48045301 | 21.62936 | 0.085853 | 26.55 |
| 600380 | 2017 | 0.828 | 0.02 | 0.693147 | 0.48045301 | 23.82388 | 0.302158 | 47.17 |
| 300319 | 2017 | 0.649 | 0.02 | 0.693147 | 0.48045301 | 21.54962 | -0.18104 | 27.06 |
| 2106   | 2017 | -0.5  | 0.02 | 0.693147 | 0.48045301 | 22.26482 | 0.039185 | 20.84 |
| 300207 | 2017 | 0.248 | 0.02 | 0.693147 | 0.48045301 | 23.29273 | 0.183019 | 33.82 |
| 2518   | 2017 | 0.797 | 0.02 | 0.693147 | 0.48045301 | 22.06253 | 0.163711 | 59.06 |
| 2191   | 2017 | 0.348 | 0.02 | 0.693147 | 0.48045301 | 22.81806 | 0.100535 | 30.97 |
| 300052 | 2017 | 0.869 | 0.02 | 0.693147 | 0.48045301 | 20.85417 | 0.062799 | 27.86 |
| 2766   | 2017 | 0.394 | 0.02 | 0.693147 | 0.48045301 | 22.2007  | -0.01973 | 45.31 |
| 2786   | 2017 | -0.63 | 0.02 | 0.693147 | 0.48045301 | 22.07202 | 0.056555 | 35.74 |
| 2334   | 2017 | 0.27  | 0.02 | 0.693147 | 0.48045301 | 21.89236 | 0.108504 | 17.66 |
| 600525 | 2017 | 0.482 | 0.02 | 0.693147 | 0.48045301 | 23.74551 | 0.147776 | 7.84  |
| 2161   | 2017 | 0.394 | 0.02 | 0.693147 | 0.48045301 | 21.54717 | 0.001497 | 24.39 |
| 2334   | 2017 | 0.27  | 0.02 | 0.693147 | 0.48045301 | 21.89236 | 0.108504 | 17.66 |
| 2334   | 2017 | 0.27  | 0.02 | 0.693147 | 0.48045301 | 21.89236 | 0.108504 | 17.66 |
| 300532 | 2017 | 0.655 | 0.02 | 0.693147 | 0.48045301 | 20.9863  | 0.118284 | 46.12 |

|        |      |       |      |          |            |          |          |       |
|--------|------|-------|------|----------|------------|----------|----------|-------|
| 2008   | 2017 | -0.1  | 0.02 | 0.693147 | 0.48045301 | 23.36965 | 0.234874 | 15.46 |
| 300199 | 2017 | 0.545 | 0.02 | 0.693147 | 0.48045301 | 22.3906  | 0.084874 | 25.36 |
| 2786   | 2017 | -0.57 | 0.02 | 0.693147 | 0.48045301 | 22.07202 | 0.056555 | 35.74 |
| 300012 | 2017 | 0.909 | 0.02 | 0.693147 | 0.48045301 | 21.9807  | 0.054239 | 11.72 |
| 300115 | 2017 | 0.396 | 0.02 | 0.693147 | 0.48045301 | 23.03417 | 0.126642 | 42.72 |
| 2008   | 2017 | 0.337 | 0.02 | 0.693147 | 0.48045301 | 23.36965 | 0.234874 | 15.46 |
| 2388   | 2017 | -0.54 | 0.02 | 0.693147 | 0.48045301 | 21.30378 | 0.053824 | 46.42 |
| 2008   | 2017 | 0.345 | 0.02 | 0.693147 | 0.48045301 | 23.36965 | 0.234874 | 15.46 |
| 2781   | 2017 | 0.008 | 0.02 | 0.693147 | 0.48045301 | 22.19136 | 0.076614 | 42.3  |
| 9      | 2017 | 0.167 | 0.02 | 0.693147 | 0.48045301 | 24.02315 | -0.0567  | 11.91 |
| 9      | 2017 | 0.167 | 0.02 | 0.693147 | 0.48045301 | 24.02315 | -0.0567  | 11.91 |
| 34     | 2017 | -0.31 | 0.02 | 0.693147 | 0.48045301 | 22.80577 | 0.215374 | 23.66 |
| 2351   | 2017 | -0.46 | 0.02 | 0.693147 | 0.48045301 | 21.09322 | 0.064347 | 31.7  |
| 2436   | 2017 | 0.486 | 0.02 | 0.693147 | 0.48045301 | 22.21287 | 0.077427 | 19.76 |
| 2121   | 2017 | 0.405 | 0.02 | 0.693147 | 0.48045301 | 23.45338 | 0.081888 | 43.14 |
| 2301   | 2017 | -0.15 | 0.02 | 0.693147 | 0.48045301 | 21.96668 | 0.0576   | 43.14 |
| 2672   | 2017 | -0.32 | 0.02 | 0.693147 | 0.48045301 | 22.94682 | 0.128037 | 22.53 |
| 2369   | 2017 | -0.12 | 0.02 | 0.693147 | 0.48045301 | 22.12726 | 0.005593 | 19.54 |
| 2835   | 2017 | 1.011 | 0.02 | 0.693147 | 0.48045301 | 20.54676 | 0.031427 | 32.03 |
| 300311 | 2017 | 1.817 | 0.02 | 0.693147 | 0.48045301 | 21.5513  | 0.11825  | 39.49 |
| 2436   | 2017 | -0.52 | 0.02 | 0.693147 | 0.48045301 | 22.21287 | 0.077427 | 19.76 |
| 2130   | 2017 | -0.69 | 0.02 | 0.693147 | 0.48045301 | 22.55268 | 0.060011 | 27.47 |
| 2105   | 2017 | -0.72 | 0.02 | 0.693147 | 0.48045301 | 21.0976  | 0.075183 | 41.93 |
| 2325   | 2017 | 0.153 | 0.02 | 0.693147 | 0.48045301 | 23.13825 | 0.033944 | 30.01 |
| 300197 | 2017 | -0.62 | 0.02 | 0.693147 | 0.48045301 | 23.73369 | 0.119324 | 41.56 |
| 300151 | 2017 | -0.53 | 0.02 | 0.693147 | 0.48045301 | 20.69812 | 0.040844 | 45.86 |
| 2583   | 2017 | 1.188 | 0.02 | 0.693147 | 0.48045301 | 23.3573  | 0.043335 | 51.43 |
| 300085 | 2017 | 0.997 | 0.02 | 0.693147 | 0.48045301 | 21.52009 | 0.018351 | 18.98 |
| 2130   | 2017 | -0.2  | 0.02 | 0.693147 | 0.48045301 | 22.55268 | 0.060011 | 27.47 |
| 999    | 2017 | 0.511 | 0.02 | 0.693147 | 0.48045301 | 23.508   | 0.131014 | 63.6  |
| 2008   | 2017 | 0.05  | 0.02 | 0.693147 | 0.48045301 | 23.36965 | 0.234874 | 15.46 |
| 300232 | 2017 | -0.31 | 0.02 | 0.693147 | 0.48045301 | 22.31078 | 0.140586 | 41.38 |
| 2008   | 2017 | -0.1  | 0.02 | 0.693147 | 0.48045301 | 23.36965 | 0.234874 | 15.46 |
| 2197   | 2017 | 0.221 | 0.02 | 0.693147 | 0.48045301 | 22.39496 | 0.010473 | 20.32 |
| 39     | 2017 | -0.84 | 0.02 | 0.693147 | 0.48045301 | 25.59544 | 0.005707 | 58.02 |
| 9      | 2017 | -0.11 | 0.02 | 0.693147 | 0.48045301 | 24.02315 | -0.0567  | 11.91 |
| 2227   | 2017 | 0.986 | 0.02 | 0.693147 | 0.48045301 | 20.79148 | 0.018525 | 57.57 |
| 2609   | 2017 | 1.072 | 0.02 | 0.693147 | 0.48045301 | 21.6906  | 0.093088 | 35.37 |
| 2340   | 2017 | 0.226 | 0.02 | 0.693147 | 0.48045301 | 23.82563 | 0.082629 | 12.44 |
| 2138   | 2017 | 0.444 | 0.02 | 0.693147 | 0.48045301 | 22.28526 | 0.084934 | 15.59 |
| 2008   | 2017 | 0.168 | 0.02 | 0.693147 | 0.48045301 | 23.36965 | 0.234874 | 15.46 |
| 39     | 2017 | -0.18 | 0.02 | 0.693147 | 0.48045301 | 25.59544 | 0.005707 | 58.02 |
| 2763   | 2017 | -0.82 | 0.02 | 0.693147 | 0.48045301 | 21.38328 | 0.132615 | 35.6  |
| 300301 | 2017 | -0.58 | 0.02 | 0.693147 | 0.48045301 | 22.05966 | 0.040474 | 21.02 |
| 2340   | 2017 | 0.618 | 0.02 | 0.693147 | 0.48045301 | 23.82563 | 0.082629 | 12.44 |
| 39     | 2017 | -0.55 | 0.02 | 0.693147 | 0.48045301 | 25.59544 | 0.005707 | 58.02 |
| 2289   | 2017 | 0.569 | 0.02 | 0.693147 | 0.48045301 | 20.41386 | -0.27749 | 8.42  |
| 39     | 2017 | -0.31 | 0.02 | 0.693147 | 0.48045301 | 25.59544 | 0.005707 | 58.02 |
| 2340   | 2017 | -0.42 | 0.02 | 0.693147 | 0.48045301 | 23.82563 | 0.082629 | 12.44 |
| 2609   | 2017 | 1.072 | 0.02 | 0.693147 | 0.48045301 | 21.68651 | 0.093088 | 35.37 |
| 2456   | 2017 | -0.08 | 0.02 | 0.693147 | 0.48045301 | 23.51688 | 0.089338 | 19.29 |
| 2340   | 2017 | -0.55 | 0.02 | 0.693147 | 0.48045301 | 23.82563 | 0.082629 | 12.44 |
| 600380 | 2017 | -0.23 | 0.02 | 0.693147 | 0.48045301 | 23.82388 | 0.302158 | 47.17 |
| 2548   | 2017 | 0.164 | 0.02 | 0.693147 | 0.48045301 | 21.97989 | 0.056841 | 39.65 |

|        |      |       |      |          |            |          |          |       |
|--------|------|-------|------|----------|------------|----------|----------|-------|
| 1979   | 2017 | 0.334 | 0.02 | 0.693147 | 0.48045301 | 25.74206 | 0.161769 | 66.1  |
| 2340   | 2017 | -0.55 | 0.02 | 0.693147 | 0.48045301 | 23.82563 | 0.082629 | 12.44 |
| 603118 | 2017 | 0.109 | 0.02 | 0.693147 | 4.80E-01   | 22.70093 | 0.022881 | 24.98 |
| 2341   | 2017 | -0.56 | 0.02 | 0.693147 | 4.80E-01   | 22.59578 | 0.049358 | 25.59 |
| 2660   | 2017 | -0.64 | 0.02 | 0.693147 | 4.80E-01   | 21.44009 | 0.027671 | 30.59 |
| 9      | 2017 | 0.609 | 0.02 | 0.693147 | 4.80E-01   | 24.02315 | -0.0567  | 11.91 |
| 2121   | 2017 | 1.332 | 0.02 | 0.693147 | 4.80E-01   | 23.45338 | 0.081888 | 43.14 |
| 300131 | 2017 | -0.5  | 0.02 | 0.693147 | 4.80E-01   | 22.35561 | 0.085853 | 26.55 |
| 300311 | 2017 | 1.937 | 0.02 | 0.693147 | 4.80E-01   | 21.5513  | 0.11825  | 39.49 |
| 300232 | 2017 | -0.55 | 0.02 | 0.693147 | 4.80E-01   | 22.31078 | 0.140586 | 41.38 |
| 2294   | 2017 | 1.137 | 0.02 | 0.693147 | 4.80E-01   | 22.64961 | 0.233316 | 65.73 |
| 600380 | 2017 | -0.23 | 0.02 | 0.693147 | 0.48045301 | 23.82388 | 0.302158 | 47.17 |
| 300333 | 2017 | 2.597 | 0.02 | 0.693147 | 0.48045301 | 20.6092  | 0.042243 | 22.23 |
| 2724   | 2017 | -0.31 | 0.02 | 0.693147 | 0.48045301 | 21.44693 | 0.086153 | 70.42 |
| 300227 | 2017 | -0.48 | 0.02 | 0.693147 | 0.48045301 | 20.78301 | 0.082602 | 18.86 |
| 68     | 2017 | 0.366 | 0.02 | 0.693147 | 0.48045301 | 21.75421 | 0.029877 | 26.43 |
| 49     | 2017 | -0.19 | 0.02 | 0.693147 | 0.48045301 | 22.75392 | 0.2004   | 45.23 |
| 300311 | 2017 | 1.937 | 0.02 | 0.693147 | 0.48045301 | 21.5513  | 0.11825  | 39.49 |
| 300154 | 2017 | 0.174 | 0.02 | 0.693147 | 0.48045301 | 21.39262 | 0.052606 | 39.52 |
| 2008   | 2017 | 0.365 | 0.02 | 0.693147 | 0.48045301 | 23.36965 | 0.234874 | 15.46 |
| 600525 | 2017 | 0.349 | 0.02 | 0.693147 | 0.48045301 | 23.74551 | 0.147776 | 7.84  |
| 300241 | 2017 | -0.37 | 0.02 | 0.693147 | 0.48045301 | 21.59838 | 0.108298 | 24.8  |
| 2660   | 2017 | -0.64 | 0.02 | 0.693147 | 0.48045301 | 21.44009 | 0.027671 | 30.59 |
| 2130   | 2017 | -0.14 | 0.02 | 0.693147 | 0.48045301 | 22.55268 | 0.060011 | 27.47 |
| 2341   | 2017 | 0.768 | 0.02 | 0.693147 | 0.48045301 | 22.59578 | 0.049358 | 25.59 |
| 300241 | 2017 | -0.73 | 0.02 | 0.693147 | 0.48045301 | 21.59838 | 0.108298 | 24.8  |
| 2139   | 2017 | 0.034 | 0.02 | 0.693147 | 0.48045301 | 21.84001 | 0.108329 | 23.24 |
| 39     | 2017 | -0.28 | 0.02 | 0.693147 | 0.48045301 | 25.59544 | 0.005707 | 58.02 |
| 300115 | 2017 | 0.474 | 0.02 | 0.693147 | 0.48045301 | 23.03417 | 0.126642 | 42.72 |
| 2815   | 2017 | 0.682 | 0.02 | 0.693147 | 0.48045301 | 22.32125 | 0.175815 | 60.63 |
| 300301 | 2017 | -0.14 | 0.02 | 0.693147 | 0.48045301 | 22.05966 | 0.040474 | 21.02 |
| 2303   | 2017 | -0.01 | 0.02 | 0.693147 | 0.48045301 | 22.5035  | 0.077393 | 43.09 |
| 300131 | 2017 | 0.05  | 0.02 | 0.693147 | 0.48045301 | 22.35561 | 0.085853 | 26.55 |
| 300136 | 2017 | 0.409 | 0.02 | 0.693147 | 0.48045301 | 22.39722 | 0.302158 | 20.14 |
| 300134 | 2017 | 0.502 | 0.02 | 0.693147 | 0.48045301 | 22.64946 | -0.098   | 43.39 |
| 60     | 2017 | -0.27 | 0.02 | 0.693147 | 0.48045301 | 23.66078 | 0.105093 | 27.51 |
| 16     | 2017 | -0.16 | 0.02 | 0.693147 | 0.48045301 | 23.88276 | 0.302158 | 21.75 |
| 300389 | 2017 | -0.19 | 0.02 | 0.693147 | 0.48045301 | 21.3106  | 0.099564 | 25.81 |
| 50     | 2017 | 0.928 | 0.02 | 0.693147 | 0.48045301 | 24.1128  | 0.055766 | 20.81 |
| 2733   | 2017 | -0.21 | 0.02 | 0.693147 | 0.48045301 | 21.9825  | 0.015271 | 36.26 |
| 600525 | 2017 | 0.227 | 0.02 | 0.693147 | 0.48045301 | 23.74551 | 0.147776 | 7.84  |
| 32     | 2017 | -0.42 | 0.02 | 0.693147 | 0.48045301 | 21.37941 | 0.008329 | 49.18 |
| 2456   | 2017 | 4E-04 | 0.02 | 0.693147 | 0.48045301 | 24.15202 | 0.089338 | 19.29 |
| 21     | 2017 | -0.73 | 0.02 | 0.693147 | 0.48045301 | 23.53264 | -0.02587 | 44.51 |
| 300303 | 2017 | -0.55 | 0.02 | 0.693147 | 0.48045301 | 21.92271 | 0.024323 | 22.92 |
| 300303 | 2017 | 0.412 | 0.02 | 0.693147 | 0.48045301 | 21.92271 | 0.024323 | 22.92 |
| 39     | 2017 | -0.44 | 0.02 | 0.693147 | 0.48045301 | 25.59544 | 0.005707 | 58.02 |
| 2475   | 2017 | -0.32 | 0.02 | 0.693147 | 0.48045301 | 24.01487 | 0.125514 | 48.17 |
| 39     | 2017 | -0.62 | 0.02 | 0.693147 | 0.48045301 | 25.59544 | 0.005707 | 58.02 |
| 2681   | 2017 | -0.25 | 0.02 | 0.693147 | 0.48045301 | 22.89595 | 0.07212  | 37.7  |
| 999    | 2017 | 0.087 | 0.02 | 0.693147 | 0.48045301 | 23.508   | 0.131014 | 63.6  |
| 70     | 2017 | -0.36 | 0.02 | 0.693147 | 0.48045301 | 22.52944 | 0.05761  | 39.18 |
| 39     | 2017 | -0.45 | 0.02 | 0.693147 | 0.48045301 | 25.59544 | 0.005707 | 58.02 |
| 300317 | 2017 | -0.69 | 0.02 | 0.693147 | 0.48045301 | 22.92319 | 0.058224 | 26.39 |



|        |      |       |      |          |            |          |          |       |
|--------|------|-------|------|----------|------------|----------|----------|-------|
| 2831   | 2017 | -0.56 | 0.02 | 0.693147 | 0.48045301 | 22.91861 | 0.185639 | 52.75 |
| 300044 | 2017 | 0.394 | 0.02 | 0.693147 | 0.48045301 | 22.04703 | 0.077296 | 14.65 |
| 2121   | 2017 | 1.332 | 0.02 | 0.693147 | 0.48045301 | 23.45338 | 0.081888 | 43.14 |
| 600525 | 2017 | -0.18 | 0.02 | 0.693147 | 0.48045301 | 23.74551 | 0.147776 | 7.84  |
| 2356   | 2017 | -0.78 | 0.02 | 0.693147 | 0.48045301 | 22.66988 | 0.10405  | 49.28 |
| 300044 | 2017 | 1.072 | 0.02 | 0.693147 | 0.48045301 | 22.04703 | 0.077296 | 14.65 |
| 2594   | 2017 | 0.081 | 0.02 | 0.693147 | 0.48045301 | 25.74206 | 0.082007 | 25.26 |
| 300151 | 2017 | -0.35 | 0.02 | 0.693147 | 0.48045301 | 20.48231 | 0.040844 | 45.86 |
| 16     | 2017 | 0.104 | 0.02 | 0.693147 | 0.48045301 | 23.88276 | 0.302158 | 21.75 |
| 2402   | 2017 | -0.57 | 0.02 | 0.693147 | 0.48045301 | 21.46643 | 0.136117 | 17.57 |
| 2130   | 2017 | -0.2  | 0.02 | 0.693147 | 0.48045301 | 22.38525 | 0.060011 | 27.47 |
| 600525 | 2017 | 0.482 | 0.02 | 0.693147 | 0.48045301 | 23.74551 | 0.147776 | 7.84  |
| 39     | 2017 | -0.55 | 0.02 | 0.693147 | 0.48045301 | 25.59544 | 0.005707 | 58.02 |
| 300052 | 2017 | 0.869 | 0.02 | 0.693147 | 0.48045301 | 20.85417 | 0.062799 | 27.86 |
| 39     | 2017 | -0.84 | 0.02 | 0.693147 | 0.48045301 | 25.59544 | 0.005707 | 58.02 |
| 2672   | 2017 | -0.09 | 0.02 | 0.693147 | 0.48045301 | 22.94682 | 0.128037 | 22.53 |
| 2170   | 2017 | 0.707 | 0.02 | 0.693147 | 0.48045301 | 22.25015 | -0.05874 | 28.98 |
| 300162 | 2017 | 0.006 | 0.02 | 0.693147 | 0.48045301 | 21.02774 | 0.019384 | 22.54 |
| 2334   | 2017 | 0.638 | 0.02 | 0.693147 | 0.48045301 | 21.89236 | 0.108504 | 17.66 |
| 300131 | 2017 | -0.5  | 0.02 | 0.693147 | 0.48045301 | 22.35561 | 0.085853 | 26.55 |
| 27     | 2017 | -0.38 | 0.02 | 0.693147 | 0.48045301 | 25.07007 | 0.034182 | 47.82 |
| 300227 | 2017 | 0.842 | 0.02 | 0.693147 | 0.48045301 | 20.78301 | 0.082602 | 18.86 |
| 2301   | 2017 | 0.586 | 0.02 | 0.693147 | 0.48045301 | 22.27341 | 0.0576   | 43.14 |
| 2191   | 2017 | -0.37 | 0.02 | 0.693147 | 0.48045301 | 22.81806 | 0.100535 | 30.97 |
| 63     | 2017 | 1.204 | 0.02 | 0.693147 | 0.48045301 | 25.69282 | 0.212929 | 30.34 |
| 300206 | 2017 | 0.601 | 0.02 | 0.693147 | 0.48045301 | 21.07659 | 0.030303 | 20.86 |
| 2191   | 2017 | -0.59 | 0.02 | 0.693147 | 0.48045301 | 22.81806 | 0.100535 | 30.97 |
| 49     | 2017 | -0.27 | 0.02 | 0.693147 | 0.48045301 | 20.10336 | 0.2004   | 45.23 |
| 2243   | 2017 | 0.214 | 0.02 | 0.693147 | 0.48045301 | 21.37071 | 0.033161 | 51.52 |
| 999    | 2017 | 0.069 | 0.02 | 0.693147 | 0.48045301 | 23.508   | 0.131014 | 63.6  |
| 2055   | 2017 | -0.2  | 0.02 | 0.693147 | 0.48045301 | 22.98371 | 0.052418 | 29.92 |
| 16     | 2017 | -0.29 | 0.02 | 0.693147 | 0.48045301 | 23.88276 | 0.302158 | 21.75 |
| 2161   | 2017 | 0.394 | 0.02 | 0.693147 | 0.48045301 | 21.54717 | 0.001497 | 24.39 |
| 2786   | 2017 | -0.41 | 0.02 | 0.693147 | 0.48045301 | 22.07202 | 0.056555 | 35.74 |
| 2822   | 2017 | -0.49 | 0.02 | 0.693147 | 0.48045301 | 22.14153 | 0.078734 | 33.07 |
| 300556 | 2017 | 0.057 | 0.02 | 0.693147 | 0.48045301 | 20.18637 | 0.032428 | 30.06 |
| 300252 | 2017 | -0.6  | 0.02 | 0.693147 | 0.48045301 | 22.49488 | 0.062486 | 34.12 |
| 2161   | 2017 | 0.394 | 0.02 | 0.693147 | 0.48045301 | 21.54717 | 0.001497 | 24.39 |
| 300538 | 2017 | -0.16 | 0.02 | 0.693147 | 0.48045301 | 20.10336 | 0.046382 | 25.54 |
| 300252 | 2017 | -0.51 | 0.02 | 0.693147 | 0.48045301 | 22.49488 | 0.062486 | 34.12 |
| 300134 | 2017 | -0.1  | 0.02 | 0.693147 | 0.48045301 | 22.67964 | -0.098   | 43.39 |
| 2163   | 2017 | -0.43 | 0.02 | 0.693147 | 0.48045301 | 22.63224 | -0.07214 | 13.74 |
| 26     | 2017 | -0.35 | 0.02 | 0.693147 | 0.48045301 | 21.99857 | 0.054905 | 37.15 |
| 300556 | 2017 | 0.501 | 0.02 | 0.693147 | 0.48045301 | 20.16016 | 0.032428 | 30.06 |
| 2609   | 2017 | 0.487 | 0.02 | 0.693147 | 0.48045301 | 21.6906  | 0.093088 | 35.37 |
| 2130   | 2017 | -0.2  | 0.02 | 0.693147 | 0.48045301 | 22.55268 | 0.060011 | 27.47 |
| 603118 | 2017 | 0.46  | 0.02 | 0.693147 | 0.48045301 | 22.70093 | 0.022881 | 24.98 |
| 300124 | 2017 | 0.369 | 0.02 | 0.693147 | 0.48045301 | 22.92571 | 0.190616 | 18.63 |
| 300457 | 2017 | -0.04 | 0.02 | 0.693147 | 0.48045301 | 21.87111 | 0.180165 | 42.07 |
| 2735   | 2017 | -0.88 | 0.02 | 0.693147 | 0.48045301 | 20.49067 | 0.07261  | 51.51 |
| 300538 | 2017 | -0.16 | 0.02 | 0.693147 | 0.48045301 | 20.16036 | 0.046382 | 25.54 |
| 9      | 2017 | 0.368 | 0.02 | 0.693147 | 0.48045301 | 24.02315 | -0.0567  | 11.91 |
| 300556 | 2017 | -0.31 | 0.02 | 0.693147 | 0.48045301 | 20.18637 | 0.032428 | 30.06 |
| 300572 | 2017 | 0.124 | 0.02 | 0.693147 | 0.48045301 | 20.8172  | 0.141372 | 27.88 |

|        |      |       |      |          |            |          |          |       |
|--------|------|-------|------|----------|------------|----------|----------|-------|
| 2352   | 2017 | 0.438 | 0.02 | 0.693147 | 0.48045301 | 24.77783 | 0.145172 | 61.25 |
| 2733   | 2017 | -0.65 | 0.02 | 0.693147 | 0.48045301 | 21.9825  | 0.015271 | 36.26 |
| 39     | 2017 | -0.18 | 0.02 | 0.693147 | 0.48045301 | 25.59544 | 0.005707 | 58.02 |
| 16     | 2017 | -0.7  | 0.02 | 0.693147 | 0.48045301 | 23.88276 | 0.302158 | 21.75 |
| 26     | 2017 | -0.91 | 0.02 | 0.693147 | 0.48045301 | 21.8291  | 0.057787 | 37.15 |
| 300241 | 2017 | -0.4  | 0.02 | 0.693147 | 0.48045301 | 21.59838 | 0.108298 | 24.8  |
| 2170   | 2017 | 0.334 | 0.02 | 0.693147 | 0.48045301 | 22.25015 | -0.05874 | 28.98 |
| 300124 | 2017 | 1.095 | 0.02 | 0.693147 | 0.48045301 | 22.92571 | 0.190616 | 18.63 |
| 300134 | 2017 | 0.363 | 0.02 | 0.693147 | 0.48045301 | 22.67964 | -0.098   | 43.39 |
| 45     | 2017 | -0.26 | 0.02 | 0.693147 | 0.48045301 | 22.15734 | 0.020909 | 45.78 |
| 2170   | 2017 | 0.781 | 0.02 | 0.693147 | 0.48045301 | 22.25015 | -0.05874 | 28.98 |
| 300565 | 2017 | -0.13 | 0.02 | 0.693147 | 0.48045301 | 20.83257 | 0.078829 | 14.14 |
| 300269 | 2017 | -0.42 | 0.02 | 0.693147 | 0.48045301 | 22.75694 | 0.021003 | 18.81 |
| 66     | 2017 | 1.101 | 0.02 | 0.693147 | 0.48045301 | 23.44467 | 0.05082  | 40.91 |
| 2163   | 2017 | -0.87 | 0.02 | 0.693147 | 0.48045301 | 22.63224 | -0.07214 | 13.74 |
| 2594   | 2017 | -0.47 | 0.02 | 0.693147 | 0.48045301 | 25.74206 | 0.082007 | 25.26 |
| 16     | 2017 | -0.15 | 0.02 | 0.693147 | 0.48045301 | 23.88276 | 0.302158 | 21.75 |
| 39     | 2017 | -0.4  | 0.02 | 0.693147 | 0.48045301 | 25.59544 | 0.005707 | 58.02 |
| 2301   | 2017 | 0.515 | 0.02 | 0.693147 | 0.48045301 | 22.27341 | 0.0576   | 43.14 |
| 12     | 2017 | -0.65 | 0.02 | 0.693147 | 0.48045301 | 23.69547 | 0.064394 | 14.84 |
| 39     | 2017 | -0.65 | 0.02 | 0.693147 | 0.48045301 | 25.59544 | 0.005707 | 58.02 |
| 78     | 2017 | 0.357 | 0.02 | 0.693147 | 0.48045301 | 24.15287 | 0.21147  | 45.96 |
| 300130 | 2017 | 0.235 | 0.02 | 0.693147 | 0.48045301 | 22.08278 | 0.035605 | 28.87 |
| 555    | 2017 | 0.937 | 0.02 | 0.693147 | 0.48045301 | 23.09536 | 0.064195 | 40.43 |
| 300317 | 2017 | -0.26 | 0.02 | 0.693147 | 0.48045301 | 22.92319 | 0.058224 | 26.39 |
| 63     | 2017 | 1.204 | 0.02 | 0.693147 | 0.48045301 | 25.69282 | 0.212929 | 30.34 |
| 300319 | 2017 | -0.22 | 0.02 | 0.693147 | 0.48045301 | 21.85769 | -0.18104 | 27.06 |
| 300232 | 2017 | -0.24 | 0.02 | 0.693147 | 0.48045301 | 22.31078 | 0.140586 | 41.38 |
| 39     | 2017 | -0.84 | 0.02 | 0.693147 | 0.48045301 | 25.59544 | 0.005707 | 58.02 |
| 9      | 2017 | 0.609 | 0.02 | 0.693147 | 0.48045301 | 24.02315 | -0.0567  | 11.91 |
| 2835   | 2017 | 1.011 | 0.02 | 0.693147 | 0.48045301 | 20.4903  | 0.031427 | 32.03 |
| 2620   | 2017 | 0.168 | 0.02 | 0.693147 | 0.48045301 | 22.03912 | 0.064293 | 21.05 |
| 9      | 2017 | -0.27 | 0.02 | 0.693147 | 0.48045301 | 24.02315 | -0.0567  | 11.91 |
| 603160 | 2017 | 1.94  | 0.02 | 0.693147 | 0.48045301 | 22.21699 | 0.254448 | 48.41 |
| 300197 | 2017 | 0.043 | 0.02 | 0.693147 | 0.48045301 | 23.60912 | 0.119324 | 41.56 |
| 9      | 2017 | -0.72 | 0.02 | 0.693147 | 0.48045301 | 24.02315 | -0.0567  | 11.91 |
| 600525 | 2017 | 0.482 | 0.02 | 0.693147 | 0.48045301 | 23.74551 | 0.147776 | 7.84  |
| 600380 | 2017 | 0.828 | 0.02 | 0.693147 | 0.48045301 | 23.82388 | 0.302158 | 47.17 |
| 300317 | 2017 | -0.28 | 0.02 | 0.693147 | 0.48045301 | 22.92319 | 0.058224 | 26.39 |
| 2388   | 2017 | -0.54 | 0.02 | 0.693147 | 0.48045301 | 21.30378 | 0.053824 | 46.42 |
| 12     | 2017 | -0.81 | 0.02 | 0.693147 | 0.48045301 | 23.69547 | 0.064394 | 14.84 |
| 2055   | 2017 | 0.765 | 0.02 | 0.693147 | 0.48045301 | 22.98371 | 0.052418 | 29.92 |
| 2822   | 2017 | -0.3  | 0.02 | 0.693147 | 0.48045301 | 22.14153 | 0.078734 | 33.07 |
| 2138   | 2017 | 0.846 | 0.02 | 0.693147 | 0.48045301 | 22.28526 | 0.084934 | 15.59 |
| 2548   | 2017 | 0.09  | 0.02 | 0.693147 | 0.48045301 | 21.97989 | 0.056841 | 39.65 |
| 9      | 2017 | -0.05 | 0.02 | 0.693147 | 0.48045301 | 24.02315 | -0.0567  | 11.91 |
| 2303   | 2017 | -0.2  | 0.02 | 0.693147 | 0.48045301 | 22.5035  | 0.077393 | 43.09 |
| 603118 | 2017 | 0.324 | 0.02 | 0.693147 | 0.48045301 | 22.70093 | 0.022881 | 24.98 |
| 2055   | 2017 | -0.56 | 0.02 | 0.693147 | 0.48045301 | 22.98371 | 0.052418 | 29.92 |
| 555    | 2017 | -0.06 | 0.02 | 0.693147 | 0.48045301 | 23.09536 | 0.064195 | 40.43 |
| 2482   | 2017 | -0.21 | 0.02 | 0.693147 | 0.48045301 | 23.48734 | 0.096247 | 39.71 |
| 2055   | 2017 | 0.102 | 0.02 | 0.693147 | 0.48045301 | 22.98371 | 0.052418 | 29.92 |
| 39     | 2017 | -0.37 | 0.02 | 0.693147 | 0.48045301 | 25.59544 | 0.005707 | 58.02 |
| 2352   | 2017 | -0.41 | 0.02 | 0.693147 | 0.48045301 | 24.77783 | 0.145172 | 61.25 |

|        |      |       |      |          |            |          |          |       |
|--------|------|-------|------|----------|------------|----------|----------|-------|
| 70     | 2017 | 0.795 | 0.02 | 0.693147 | 0.48045301 | 22.52944 | 0.05761  | 39.18 |
| 300199 | 2017 | 0.285 | 0.02 | 0.693147 | 0.48045301 | 22.3906  | 0.084874 | 25.36 |
| 90     | 2017 | -0.19 | 0.02 | 0.693147 | 0.48045301 | 23.97336 | 0.090795 | 23.47 |
| 2475   | 2017 | -0.5  | 0.02 | 0.693147 | 0.48045301 | 24.01487 | 0.125514 | 48.17 |
| 300130 | 2017 | 0.235 | 0.02 | 0.693147 | 0.48045301 | 22.08278 | 0.035605 | 28.87 |
| 2047   | 2017 | 0.82  | 0.02 | 0.693147 | 0.48045301 | 22.84876 | 0.099929 | 24.48 |
| 300269 | 2017 | -0.42 | 0.02 | 0.693147 | 0.48045301 | 22.75694 | 0.021003 | 18.81 |
| 50     | 2017 | 0.928 | 0.02 | 0.693147 | 0.48045301 | 24.1128  | 0.055766 | 20.81 |
| 39     | 2017 | -0.27 | 0.02 | 0.693147 | 0.48045301 | 25.59544 | 0.005707 | 58.02 |
| 2766   | 2017 | -0.11 | 0.02 | 0.693147 | 0.48045301 | 22.2007  | -0.01973 | 45.31 |
| 2429   | 2017 | -0.34 | 0.02 | 0.693147 | 0.48045301 | 23.53385 | 0.073162 | 54.5  |
| 300151 | 2017 | -0.53 | 0.02 | 0.693147 | 0.48045301 | 20.69812 | 0.040844 | 45.86 |
| 2583   | 2017 | 0.906 | 0.02 | 0.693147 | 0.48045301 | 23.3573  | 0.043335 | 51.43 |
| 21     | 2017 | 0.424 | 0.02 | 0.693147 | 0.48045301 | 23.53264 | -0.02587 | 44.51 |
| 16     | 2017 | -0.82 | 0.02 | 0.693147 | 0.48045301 | 23.88276 | 0.302158 | 21.75 |
| 300037 | 2017 | -0.32 | 0.02 | 0.693147 | 0.48045301 | 22.03136 | 0.116608 | 15.09 |
| 2227   | 2017 | 1.589 | 0.02 | 0.693147 | 0.48045301 | 20.87943 | 0.018525 | 57.57 |
| 300457 | 2017 | -0.19 | 0.02 | 0.693147 | 0.48045301 | 21.87111 | 0.180165 | 42.07 |
| 2227   | 2017 | 0.705 | 0.02 | 0.693147 | 0.48045301 | 20.79148 | 0.018525 | 57.57 |
| 2227   | 2017 | 0.986 | 0.02 | 0.693147 | 0.48045301 | 20.79148 | 0.018525 | 57.57 |
| 2215   | 2017 | 0.511 | 0.02 | 0.693147 | 0.48045301 | 22.23673 | 0.142671 | 27.02 |
| 600525 | 2017 | 0.482 | 0.02 | 0.693147 | 0.48045301 | 23.74551 | 0.147776 | 7.84  |
| 2587   | 2017 | 0.221 | 0.02 | 0.693147 | 0.48045301 | 21.30742 | 0.113127 | 27.72 |
| 66     | 2017 | 0.092 | 0.02 | 0.693147 | 0.48045301 | 23.44467 | 0.05082  | 40.91 |
| 300044 | 2017 | 0.424 | 0.02 | 0.693147 | 0.48045301 | 22.04703 | 0.077296 | 14.65 |
| 300227 | 2017 | 0.052 | 0.02 | 0.693147 | 0.48045301 | 20.78301 | 0.082602 | 18.86 |
| 2008   | 2017 | 0.505 | 0.02 | 0.693147 | 0.48045301 | 23.36965 | 0.234874 | 15.46 |
| 2456   | 2017 | -0.61 | 0.02 | 0.693147 | 0.48045301 | 24.15202 | 0.089338 | 19.29 |
| 2594   | 2017 | -0.47 | 0.02 | 0.693147 | 0.48045301 | 24.78534 | 0.082007 | 25.26 |
| 34     | 2017 | 0.406 | 0.02 | 0.693147 | 0.48045301 | 23.91264 | 0.215374 | 23.66 |
| 2294   | 2017 | 1.137 | 0.02 | 0.693147 | 0.48045301 | 22.64961 | 0.233316 | 65.73 |
| 600525 | 2017 | 0.482 | 0.02 | 0.693147 | 0.48045301 | 23.74551 | 0.147776 | 7.84  |
| 2654   | 2017 | -0.54 | 0.02 | 0.693147 | 0.48045301 | 22.18356 | 0.053409 | 16.73 |
| 39     | 2017 | -0.84 | 0.02 | 0.693147 | 0.48045301 | 25.59544 | 0.005707 | 58.02 |
| 55     | 2017 | -0.36 | 0.02 | 0.693147 | 0.48045301 | 22.75475 | 0.302158 | 8.72  |
| 2008   | 2017 | 0.234 | 0.02 | 0.693147 | 0.48045301 | 23.36965 | 0.234874 | 15.46 |
| 2170   | 2017 | 0.781 | 0.02 | 0.693147 | 0.48045301 | 22.25015 | -0.05874 | 28.98 |
| 300506 | 2017 | -0.56 | 0.02 | 0.693147 | 0.48045301 | 21.2001  | 0.234924 | 50.63 |
| 300037 | 2017 | 1.008 | 0.02 | 0.693147 | 0.48045301 | 22.03136 | 0.116608 | 15.09 |
| 69     | 2017 | -0.86 | 0.02 | 0.693147 | 0.48045301 | 25.10725 | 0.228299 | 53.47 |
| 2672   | 2017 | -0.62 | 0.02 | 0.693147 | 0.48045301 | 22.94682 | 0.128037 | 22.53 |
| 39     | 2017 | -0.55 | 0.02 | 0.693147 | 0.48045301 | 25.59544 | 0.005707 | 58.02 |
| 2008   | 2017 | 0.497 | 0.02 | 0.693147 | 0.48045301 | 23.36965 | 0.234874 | 15.46 |
| 300389 | 2017 | -0.17 | 0.02 | 0.693147 | 0.48045301 | 21.3106  | 0.099564 | 25.81 |
| 2105   | 2017 | -0.72 | 0.02 | 0.693147 | 0.48045301 | 21.0976  | 0.075183 | 41.93 |
| 66     | 2017 | -0.22 | 0.02 | 0.693147 | 0.48045301 | 23.44467 | 0.05082  | 40.91 |
| 39     | 2017 | -0.84 | 0.02 | 0.693147 | 0.48045301 | 25.59544 | 0.005707 | 58.02 |
| 2681   | 2017 | -0.55 | 0.02 | 0.693147 | 0.48045301 | 22.89595 | 0.07212  | 37.7  |
| 600525 | 2017 | 0.261 | 0.02 | 0.693147 | 0.48045301 | 23.74551 | 0.147776 | 7.84  |
| 2294   | 2017 | 1.137 | 0.02 | 0.693147 | 0.48045301 | 22.64961 | 0.233316 | 65.73 |
| 300303 | 2017 | 0.111 | 0.02 | 0.693147 | 0.48045301 | 21.90179 | 0.024323 | 22.92 |
| 300241 | 2017 | -0.73 | 0.02 | 0.693147 | 0.48045301 | 21.59838 | 0.108298 | 24.8  |
| 2213   | 2017 | 0.761 | 0.02 | 0.693147 | 0.48045301 | 20.10336 | 0.027672 | 14.56 |
| 2763   | 2017 | -0.82 | 0.02 | 0.693147 | 0.48045301 | 21.51149 | 0.132615 | 35.6  |

|        |      |       |      |          |            |          |          |       |
|--------|------|-------|------|----------|------------|----------|----------|-------|
| 68     | 2017 | -0.64 | 0.02 | 0.693147 | 0.48045301 | 21.75421 | 0.029877 | 26.43 |
| 39     | 2017 | -0.55 | 0.02 | 0.693147 | 0.48045301 | 25.59544 | 0.005707 | 58.02 |
| 600525 | 2017 | 0.482 | 0.02 | 0.693147 | 0.48045301 | 23.74551 | 0.147776 | 7.84  |
| 600525 | 2017 | 0.813 | 0.02 | 0.693147 | 0.48045301 | 23.74551 | 0.147776 | 7.84  |
| 16     | 2017 | -0.82 | 0.02 | 0.693147 | 0.48045301 | 23.88276 | 0.302158 | 21.75 |
| 300269 | 2017 | -0.42 | 0.02 | 0.693147 | 0.48045301 | 22.75694 | 0.021003 | 18.81 |
| 2218   | 2017 | 0.276 | 0.02 | 0.693147 | 0.48045301 | 22.38492 | 0.057583 | 32.55 |
| 300112 | 2017 | -0.28 | 0.02 | 0.693147 | 0.48045301 | 20.9023  | 0.048673 | 21.76 |
| 2197   | 2017 | 0.221 | 0.02 | 0.693147 | 0.48045301 | 22.39496 | 0.010473 | 20.32 |
| 300232 | 2017 | 0.084 | 0.02 | 0.693147 | 0.48045301 | 22.31078 | 0.140586 | 41.38 |
| 2334   | 2017 | 0.27  | 0.02 | 0.693147 | 0.48045301 | 21.89236 | 0.108504 | 17.66 |
| 60     | 2017 | 0.523 | 0.02 | 0.693147 | 0.48045301 | 23.66078 | 0.105093 | 27.51 |
| 2763   | 2017 | -0.82 | 0.02 | 0.693147 | 0.48045301 | 21.51149 | 0.132615 | 35.6  |
| 300506 | 2017 | -0.56 | 0.02 | 0.693147 | 0.48045301 | 21.2001  | 0.234924 | 50.63 |
| 300134 | 2017 | 0.363 | 0.02 | 0.693147 | 0.48045301 | 22.67964 | -0.098   | 43.39 |
| 2052   | 2017 | 0.633 | 0.02 | 0.693147 | 0.48045301 | 21.31936 | 0.009644 | 16.5  |
| 2816   | 2017 | -0.51 | 0.02 | 0.693147 | 0.48045301 | 20.39021 | 0.030885 | 12.43 |
| 2105   | 2017 | -0.72 | 0.02 | 0.693147 | 0.48045301 | 21.0976  | 0.075183 | 41.93 |
| 45     | 2017 | -0.26 | 0.02 | 0.693147 | 0.48045301 | 22.15734 | 0.020909 | 45.78 |
| 300543 | 2017 | -0.61 | 0.02 | 0.693147 | 0.48045301 | 20.82005 | 0.122584 | 36.12 |
| 2456   | 2017 | -0.4  | 0.02 | 0.693147 | 0.48045301 | 24.15202 | 0.089338 | 19.29 |
| 21     | 2017 | 0.35  | 0.02 | 0.693147 | 0.48045301 | 23.53264 | -0.02587 | 44.51 |
| 2215   | 2017 | 0.579 | 0.02 | 0.693147 | 0.48045301 | 22.23673 | 0.142671 | 27.02 |
| 70     | 2017 | 0.133 | 0.02 | 0.693147 | 0.48045301 | 22.52944 | 0.05761  | 39.18 |
| 2215   | 2017 | 0.579 | 0.02 | 0.693147 | 0.48045301 | 22.23673 | 0.142671 | 27.02 |
| 2215   | 2017 | 0.579 | 0.02 | 0.693147 | 0.48045301 | 22.23673 | 0.142671 | 27.02 |
| 2215   | 2017 | 0.389 | 0.02 | 0.693147 | 0.48045301 | 22.23673 | 0.142671 | 27.02 |
| 300012 | 2017 | -0.42 | 0.02 | 0.693147 | 0.48045301 | 21.9807  | 0.054239 | 11.72 |
| 600380 | 2017 | 0.828 | 0.02 | 0.693147 | 0.48045301 | 22.58315 | 0.302158 | 47.17 |
| 66     | 2017 | 0.082 | 0.02 | 0.693147 | 0.48045301 | 23.44467 | 0.05082  | 40.91 |
| 300227 | 2017 | -0.48 | 0.02 | 0.693147 | 0.48045301 | 20.78301 | 0.082602 | 18.86 |
| 2660   | 2017 | -0.42 | 0.02 | 0.693147 | 0.48045301 | 21.44009 | 0.027671 | 30.59 |
| 40     | 2017 | -0.01 | 0.02 | 0.693147 | 0.48045301 | 23.64965 | -0.01755 | 30.98 |
| 2429   | 2017 | 0.668 | 0.02 | 0.693147 | 0.48045301 | 23.53385 | 0.073162 | 54.5  |
| 2008   | 2017 | 0.282 | 0.02 | 0.693147 | 0.48045301 | 23.36965 | 0.234874 | 15.46 |
| 2594   | 2017 | -0.47 | 0.02 | 0.693147 | 0.48045301 | 25.74206 | 0.082007 | 25.26 |
| 300232 | 2017 | -0.29 | 0.02 | 0.693147 | 0.48045301 | 22.31078 | 0.140586 | 41.38 |
| 300301 | 2017 | -0.58 | 0.02 | 0.693147 | 0.48045301 | 22.05966 | 0.040474 | 21.02 |
| 69     | 2017 | -0.86 | 0.02 | 0.693147 | 0.48045301 | 25.74206 | 0.228299 | 53.47 |
| 300468 | 2017 | 2.136 | 0.02 | 0.693147 | 0.48045301 | 20.87468 | 0.09287  | 25.71 |
| 2303   | 2017 | -0.2  | 0.02 | 0.693147 | 0.48045301 | 22.5035  | 0.077393 | 43.09 |
| 2475   | 2017 | -0.5  | 0.02 | 0.693147 | 0.48045301 | 24.01487 | 0.125514 | 48.17 |
| 2548   | 2017 | 0.482 | 0.02 | 0.693147 | 0.48045301 | 21.97989 | 0.056841 | 39.65 |
| 2161   | 2017 | 1.719 | 0.02 | 0.693147 | 0.48045301 | 21.54717 | 0.001497 | 24.39 |
| 2359   | 2017 | -0.59 | 0.02 | 0.693147 | 0.48045301 | 23.25736 | 0.035655 | 35.15 |
| 39     | 2017 | -0.55 | 0.02 | 0.693147 | 0.48045301 | 25.59544 | 0.005707 | 58.02 |
| 2215   | 2017 | 0.579 | 0.02 | 0.693147 | 0.48045301 | 22.23673 | 0.142671 | 27.02 |
| 2587   | 2017 | 0.221 | 0.02 | 0.693147 | 0.48045301 | 21.30742 | 0.113127 | 27.72 |
| 16     | 2017 | -0.6  | 0.02 | 0.693147 | 0.48045301 | 23.88276 | 0.302158 | 21.75 |
| 69     | 2017 | -0.99 | 0.02 | 0.693147 | 0.48045301 | 25.74206 | 0.228299 | 53.47 |
| 2782   | 2017 | -0.68 | 0.02 | 0.693147 | 0.48045301 | 20.65015 | 0.068986 | 35.56 |
| 2421   | 2017 | -0.48 | 0.02 | 0.693147 | 0.48045301 | 22.42021 | 0.102082 | 18.81 |
| 300269 | 2017 | -0.37 | 0.02 | 0.693147 | 0.48045301 | 22.84213 | 0.021003 | 18.81 |
| 300241 | 2017 | -0.42 | 0.02 | 0.693147 | 0.48045301 | 21.59838 | 0.108298 | 24.8  |

|        |      |       |      |          |            |          |          |       |
|--------|------|-------|------|----------|------------|----------|----------|-------|
| 300167 | 2017 | 0.935 | 0.02 | 0.693147 | 0.48045301 | 20.98273 | -0.01368 | 40.19 |
| 2238   | 2017 | -0.5  | 0.02 | 0.693147 | 0.48045301 | 22.07978 | 0.088108 | 57.77 |
| 2137   | 2017 | -0.27 | 0.02 | 0.693147 | 0.48045301 | 21.45448 | 0.045266 | 37.99 |
| 600525 | 2017 | 0.116 | 0.02 | 0.693147 | 0.48045301 | 23.74551 | 0.147776 | 7.84  |
| 2163   | 2017 | -0.34 | 0.02 | 0.693147 | 0.48045301 | 22.63224 | -0.07214 | 13.74 |
| 300207 | 2017 | -0.11 | 0.02 | 0.693147 | 0.48045301 | 23.29273 | 0.183019 | 33.82 |
| 2369   | 2017 | 0.674 | 0.02 | 0.693147 | 0.48045301 | 22.12726 | 0.005593 | 19.54 |
| 300151 | 2017 | 0.128 | 0.02 | 0.693147 | 0.48045301 | 20.69812 | 0.040844 | 45.86 |
| 300012 | 2017 | -0.42 | 0.02 | 0.693147 | 0.48045301 | 21.9807  | 0.054239 | 11.72 |
| 60     | 2017 | 0.523 | 0.02 | 0.693147 | 0.48045301 | 23.37444 | 0.105093 | 27.51 |
| 555    | 2017 | -0.06 | 0.02 | 0.693147 | 0.48045301 | 21.97107 | 0.064195 | 40.43 |
| 600525 | 2017 | 1.144 | 0.02 | 0.693147 | 0.48045301 | 23.74551 | 0.147776 | 7.84  |
| 300576 | 2017 | 0.514 | 0.02 | 0.693147 | 0.48045301 | 20.10336 | 0.09041  | 13.6  |
| 2456   | 2017 | -0.55 | 0.02 | 0.693147 | 0.48045301 | 24.15202 | 0.089338 | 19.29 |
| 300468 | 2017 | 2.136 | 0.02 | 0.693147 | 0.48045301 | 20.8874  | 0.09287  | 25.71 |
| 300311 | 2017 | 1.937 | 0.02 | 0.693147 | 0.48045301 | 21.5513  | 0.11825  | 39.49 |
| 300264 | 2017 | 2.389 | 0.02 | 0.693147 | 0.48045301 | 20.62967 | -0.14594 | 29.5  |
| 2672   | 2017 | -0.62 | 0.02 | 0.693147 | 0.48045301 | 22.94682 | 0.128037 | 22.53 |
| 34     | 2017 | -0.17 | 0.02 | 0.693147 | 0.48045301 | 23.91264 | 0.215374 | 23.66 |
| 9      | 2017 | -0.72 | 0.02 | 0.693147 | 0.48045301 | 24.02315 | -0.0567  | 11.91 |
| 603118 | 2017 | 0.441 | 0.02 | 0.693147 | 0.48045301 | 22.70093 | 0.022881 | 24.98 |
| 2548   | 2017 | 0.058 | 0.02 | 0.693147 | 0.48045301 | 21.97989 | 0.056841 | 39.65 |
| 2766   | 2017 | 1.212 | 0.02 | 0.693147 | 0.48045301 | 22.2007  | -0.01973 | 45.31 |
| 2813   | 2017 | 0.681 | 0.02 | 0.693147 | 0.48045301 | 21.19023 | 0.036798 | 67.97 |
| 68     | 2017 | -0.64 | 0.02 | 0.693147 | 0.48045301 | 21.1508  | 0.029877 | 26.43 |
| 300112 | 2017 | 0.16  | 0.02 | 0.693147 | 0.48045301 | 20.9023  | 0.048673 | 21.76 |
| 300012 | 2017 | -0.08 | 0.02 | 0.693147 | 0.48045301 | 21.9807  | 0.054239 | 11.72 |
| 2548   | 2017 | 0.482 | 0.02 | 0.693147 | 0.48045301 | 21.97989 | 0.056841 | 39.65 |
| 999    | 2017 | 0.511 | 0.02 | 0.693147 | 0.48045301 | 23.508   | 0.131014 | 63.6  |
| 39     | 2017 | -0.84 | 0.02 | 0.693147 | 0.48045301 | 25.59544 | 0.005707 | 58.02 |
| 2837   | 2017 | 0.186 | 0.02 | 0.693147 | 0.48045301 | 20.95261 | 0.129885 | 28.23 |
| 2681   | 2017 | -0.55 | 0.02 | 0.693147 | 0.48045301 | 22.89595 | 0.07212  | 37.7  |
| 600380 | 2017 | 0.191 | 0.02 | 0.693147 | 0.48045301 | 23.82388 | 0.302158 | 47.17 |
| 300319 | 2017 | -0.23 | 0.02 | 0.693147 | 0.48045301 | 21.85769 | -0.18104 | 27.06 |
| 300532 | 2017 | 0.043 | 0.02 | 0.693147 | 0.48045301 | 20.9863  | 0.118284 | 46.12 |
| 2356   | 2017 | -0.52 | 0.02 | 0.693147 | 0.48045301 | 22.66988 | 0.10405  | 49.28 |
| 2583   | 2017 | 1.3   | 0.02 | 0.693147 | 0.48045301 | 23.3573  | 0.043335 | 51.43 |
| 300167 | 2017 | 0.935 | 0.02 | 0.693147 | 0.48045301 | 20.90071 | -0.01368 | 40.19 |
| 50     | 2017 | 0.488 | 0.02 | 0.693147 | 0.48045301 | 23.82528 | 0.055766 | 20.81 |
| 19     | 2017 | 0.542 | 0.02 | 0.693147 | 0.48045301 | 20.79129 | -0.0636  | 19.09 |
| 9      | 2017 | -0.38 | 0.02 | 0.693147 | 0.48045301 | 24.02315 | -0.0567  | 11.91 |
| 300311 | 2017 | 1.054 | 0.02 | 0.693147 | 0.48045301 | 21.5513  | 0.11825  | 39.49 |
| 39     | 2017 | -0.4  | 0.02 | 0.693147 | 0.48045301 | 25.59544 | 0.005707 | 58.02 |
| 2815   | 2017 | 0.682 | 0.02 | 0.693147 | 0.48045301 | 22.32125 | 0.175815 | 60.63 |
| 2672   | 2017 | -0.35 | 0.02 | 0.693147 | 0.48045301 | 22.94682 | 0.128037 | 22.53 |
| 2105   | 2017 | -0.72 | 0.02 | 0.693147 | 0.48045301 | 21.0976  | 0.075183 | 41.93 |
| 300227 | 2017 | -0.48 | 0.02 | 0.693147 | 0.48045301 | 20.78301 | 0.082602 | 18.86 |
| 2672   | 2017 | -0.62 | 0.02 | 0.693147 | 0.48045301 | 22.94682 | 0.128037 | 22.53 |
| 70     | 2017 | 0.795 | 0.02 | 0.693147 | 0.48045301 | 22.52944 | 0.05761  | 39.18 |
| 2256   | 2017 | -0.17 | 0.02 | 0.693147 | 0.48045301 | 22.07361 | 0.065891 | 26.67 |
| 66     | 2017 | -0.17 | 0.02 | 0.693147 | 0.48045301 | 23.44467 | 0.05082  | 40.91 |
| 63     | 2017 | 1.313 | 0.02 | 0.693147 | 0.48045301 | 25.69282 | 0.118694 | 30.34 |
| 2334   | 2017 | 0.27  | 0.02 | 0.693147 | 0.48045301 | 21.89236 | 0.108504 | 17.66 |
| 12     | 2017 | -0.53 | 0.02 | 0.693147 | 0.48045301 | 23.69547 | 0.064394 | 14.84 |

|        |      |       |      |          |            |          |          |       |
|--------|------|-------|------|----------|------------|----------|----------|-------|
| 2052   | 2017 | 0.411 | 0.02 | 0.693147 | 0.48045301 | 21.31936 | 0.009644 | 16.5  |
| 2620   | 2017 | 0.168 | 0.02 | 0.693147 | 0.48045301 | 22.1481  | 0.064293 | 21.05 |
| 69     | 2017 | -0.72 | 0.02 | 0.693147 | 0.48045301 | 25.74206 | 0.228299 | 53.47 |
| 9      | 2017 | 0.609 | 0.02 | 0.693147 | 0.48045301 | 24.02315 | -0.0567  | 11.91 |
| 90     | 2017 | 0.392 | 0.02 | 0.693147 | 0.48045301 | 23.97336 | 0.088657 | 23.47 |
| 300543 | 2017 | -0.61 | 0.02 | 0.693147 | 0.48045301 | 20.82005 | 0.122584 | 36.12 |
| 300227 | 2017 | -0.48 | 0.02 | 0.693147 | 0.48045301 | 20.78301 | 0.082602 | 18.86 |
| 999    | 2017 | 0.069 | 0.02 | 0.693147 | 0.48045301 | 23.08695 | 0.131014 | 63.6  |
| 300052 | 2017 | 0.869 | 0.02 | 0.693147 | 0.48045301 | 20.9111  | 0.062799 | 27.86 |
| 2672   | 2017 | -0.62 | 0.02 | 0.693147 | 0.48045301 | 22.94682 | 0.128037 | 22.53 |
| 2137   | 2017 | -0.71 | 0.02 | 0.693147 | 0.48045301 | 21.45448 | 0.045266 | 37.99 |
| 300199 | 2017 | 0.545 | 0.02 | 0.693147 | 0.48045301 | 22.3906  | 0.084874 | 25.36 |
| 9      | 2017 | 0.167 | 0.02 | 0.693147 | 0.48045301 | 24.02315 | -0.0567  | 11.91 |
| 62     | 2017 | -0.43 | 0.02 | 0.693147 | 0.48045301 | 22.87101 | 0.102065 | 70.76 |
| 300207 | 2017 | -0.02 | 0.02 | 0.693147 | 0.48045301 | 23.29273 | 0.183019 | 33.82 |
| 2356   | 2017 | -0.52 | 0.02 | 0.693147 | 0.48045301 | 22.66988 | 0.10405  | 49.28 |
| 300457 | 2017 | -0.13 | 0.02 | 0.693147 | 0.48045301 | 21.87111 | 0.180165 | 42.07 |
| 300457 | 2017 | -0.08 | 0.02 | 0.693147 | 0.48045301 | 21.87111 | 0.180165 | 42.07 |
| 39     | 2017 | -0.77 | 0.02 | 0.693147 | 0.48045301 | 25.59544 | 0.005707 | 58.02 |
| 300124 | 2017 | 0.727 | 0.02 | 0.693147 | 0.48045301 | 22.92571 | 0.190616 | 18.63 |
| 300570 | 2017 | -0.59 | 0.02 | 0.693147 | 0.48045301 | 20.95733 | 0.089072 | 16.08 |
| 300506 | 2017 | -0.56 | 0.02 | 0.693147 | 0.48045301 | 21.22024 | 0.234924 | 50.63 |
| 66     | 2017 | -0.17 | 0.02 | 0.693147 | 0.48045301 | 23.44467 | 0.05082  | 40.91 |
| 600525 | 2017 | 0.482 | 0.02 | 0.693147 | 0.48045301 | 23.74551 | 0.147776 | 7.84  |
| 300199 | 2017 | 0.285 | 0.02 | 0.693147 | 0.48045301 | 22.3906  | 0.084874 | 25.36 |
| 16     | 2017 | -0.82 | 0.02 | 0.693147 | 0.48045301 | 23.88276 | 0.302158 | 21.75 |
| 2121   | 2017 | 0.798 | 0.02 | 0.693147 | 0.48045301 | 23.31919 | 0.081888 | 43.14 |
| 39     | 2017 | -0.84 | 0.02 | 0.693147 | 0.48045301 | 25.59544 | 0.005707 | 58.02 |
| 2518   | 2017 | -0.2  | 0.02 | 0.693147 | 0.48045301 | 22.06253 | 0.163711 | 59.06 |
| 2786   | 2017 | -0.52 | 0.02 | 0.693147 | 0.48045301 | 22.07202 | 0.056555 | 35.74 |
| 300044 | 2017 | 1.072 | 0.02 | 0.693147 | 0.48045301 | 22.04703 | 0.077296 | 14.65 |
| 2789   | 2017 | -0.09 | 0.02 | 0.693147 | 0.48045301 | 22.01071 | 0.077782 | 45.23 |
| 39     | 2017 | -0.48 | 0.02 | 0.693147 | 0.48045301 | 25.59544 | 0.005707 | 58.02 |
| 78     | 2017 | -0.6  | 0.02 | 0.693147 | 0.48045301 | 24.15287 | 0.21147  | 45.96 |
| 2289   | 2017 | 0.569 | 0.02 | 0.693147 | 0.48045301 | 20.41386 | -0.27749 | 8.42  |
| 300576 | 2017 | 0.529 | 0.02 | 0.693147 | 0.48045301 | 20.10336 | 0.09041  | 13.6  |
| 600525 | 2017 | -0.18 | 0.02 | 0.693147 | 0.48045301 | 23.74551 | 0.147776 | 7.84  |
| 2303   | 2017 | -0.27 | 0.02 | 0.693147 | 0.48045301 | 22.5035  | 0.077393 | 43.09 |
| 2197   | 2017 | -0.38 | 0.02 | 0.693147 | 0.48045301 | 22.39496 | 0.010473 | 20.32 |
| 12     | 2017 | -0.64 | 0.02 | 0.693147 | 0.48045301 | 23.69547 | 0.064394 | 14.84 |
| 300532 | 2017 | 0.043 | 0.02 | 0.693147 | 0.48045301 | 20.9863  | 0.118284 | 46.12 |
| 2813   | 2017 | 0.681 | 0.02 | 0.693147 | 0.48045301 | 21.20602 | 0.036798 | 67.97 |
| 2191   | 2017 | -0.59 | 0.02 | 0.693147 | 0.48045301 | 22.81806 | 0.100535 | 30.97 |
| 300572 | 2017 | 0.124 | 0.02 | 0.693147 | 0.48045301 | 20.8172  | 0.141372 | 27.88 |
| 2191   | 2017 | 0.291 | 0.02 | 0.693147 | 0.48045301 | 22.81806 | 0.100535 | 30.97 |
| 2672   | 2017 | 0.706 | 0.02 | 0.693147 | 0.48045301 | 22.94682 | 0.128037 | 22.53 |
| 78     | 2017 | 0.357 | 0.02 | 0.693147 | 0.48045301 | 23.29443 | 0.21147  | 45.96 |
| 300047 | 2017 | 1.248 | 0.02 | 0.693147 | 0.48045301 | 22.032   | 0.061558 | 10.15 |
| 66     | 2017 | 0.628 | 0.02 | 0.693147 | 0.48045301 | 23.44467 | 0.05082  | 40.91 |
| 2775   | 2017 | 0.168 | 0.02 | 0.693147 | 0.48045301 | 21.70726 | 0.161419 | 20.65 |
| 600525 | 2017 | -0.18 | 0.02 | 0.693147 | 0.48045301 | 23.74551 | 0.147776 | 7.84  |
| 2191   | 2017 | -0.02 | 0.02 | 0.693147 | 0.48045301 | 22.81806 | 0.100535 | 30.97 |
| 300317 | 2017 | -0.69 | 0.02 | 0.693147 | 0.48045301 | 22.92319 | 0.058224 | 26.39 |
| 39     | 2017 | -0.84 | 0.02 | 0.693147 | 0.48045301 | 25.59544 | 0.005707 | 58.02 |

|        |      |       |      |          |            |          |          |       |
|--------|------|-------|------|----------|------------|----------|----------|-------|
| 2137   | 2017 | -0.18 | 0.02 | 0.693147 | 0.48045301 | 21.45448 | 0.045266 | 37.99 |
| 9      | 2017 | -0.5  | 0.02 | 0.693147 | 0.48045301 | 24.02315 | -0.0567  | 11.91 |
| 600525 | 2017 | 0.703 | 0.02 | 0.693147 | 0.48045301 | 23.74551 | 0.147776 | 7.84  |
| 2356   | 2017 | -0.78 | 0.02 | 0.693147 | 0.48045301 | 22.66988 | 0.10405  | 49.28 |
| 2815   | 2017 | 0.362 | 0.02 | 0.693147 | 0.48045301 | 22.32125 | 0.175815 | 60.63 |
| 300348 | 2017 | 1.339 | 0.02 | 0.693147 | 0.48045301 | 21.26319 | 0.080644 | 21.89 |
| 2735   | 2017 | 0.442 | 0.02 | 0.693147 | 0.48045301 | 20.49067 | 0.07261  | 51.51 |
| 300333 | 2017 | 2.597 | 0.02 | 0.693147 | 0.48045301 | 20.58131 | 0.042243 | 22.23 |
| 600525 | 2017 | 0.293 | 0.02 | 0.693147 | 0.48045301 | 23.74551 | 0.147776 | 7.84  |
| 69     | 2017 | -0.86 | 0.02 | 0.693147 | 4.80E-01   | 25.74206 | 0.228299 | 53.47 |
| 66     | 2017 | -0.17 | 0.02 | 0.693147 | 4.80E-01   | 23.44467 | 0.05082  | 40.91 |
| 2341   | 2017 | -0.56 | 0.02 | 0.693147 | 4.80E-01   | 22.59578 | 0.049358 | 25.59 |
| 90     | 2017 | -0.29 | 0.02 | 0.693147 | 4.80E-01   | 23.97336 | 0.088657 | 23.47 |
| 2314   | 2017 | -0.93 | 0.02 | 0.693147 | 4.80E-01   | 23.97586 | 0.088439 | 50.03 |
| 300206 | 2017 | 0.601 | 0.02 | 0.693147 | 4.80E-01   | 21.07889 | 0.030303 | 20.86 |
| 2766   | 2017 | 1.212 | 0.02 | 0.693147 | 4.80E-01   | 21.83544 | -0.01973 | 45.31 |
| 2402   | 2017 | 0.097 | 0.02 | 0.693147 | 4.80E-01   | 21.38511 | 0.136117 | 17.57 |
| 2121   | 2017 | 0.798 | 0.02 | 0.693147 | 4.80E-01   | 23.45338 | 0.081888 | 43.14 |
| 9      | 2017 | -0.72 | 0.02 | 0.693147 | 4.80E-01   | 24.02315 | -0.0567  | 11.91 |
| 55     | 2017 | -0.5  | 0.02 | 0.693147 | 4.80E-01   | 22.75475 | 0.111414 | 8.72  |
| 39     | 2017 | -0.84 | 0.02 | 0.693147 | 4.80E-01   | 25.59544 | 0.005707 | 58.02 |
| 60     | 2017 | -0.28 | 0.02 | 0.693147 | 0.48045301 | 23.66078 | 0.105093 | 27.51 |
| 90     | 2017 | -0.29 | 0.02 | 0.693147 | 0.48045301 | 22.94329 | 0.088657 | 23.47 |
| 2121   | 2017 | 0.405 | 0.02 | 0.693147 | 0.48045301 | 23.45338 | 0.081888 | 43.14 |
| 2436   | 2017 | 0.32  | 0.02 | 0.693147 | 0.48045301 | 21.75018 | 0.077427 | 19.76 |
| 9      | 2017 | -0.31 | 0.02 | 0.693147 | 0.48045301 | 24.02315 | -0.0567  | 11.91 |
| 2352   | 2017 | -0.63 | 0.02 | 0.693147 | 0.48045301 | 24.77783 | 0.145172 | 61.25 |
| 300227 | 2017 | 0.842 | 0.02 | 0.693147 | 0.48045301 | 20.78301 | 0.082602 | 18.86 |
| 68     | 2017 | -0.64 | 0.02 | 0.693147 | 0.48045301 | 21.75421 | 0.029877 | 26.43 |
| 2218   | 2017 | 0.276 | 0.02 | 0.693147 | 0.48045301 | 22.47249 | 0.057583 | 32.55 |
| 2215   | 2017 | 0.579 | 0.02 | 0.693147 | 0.48045301 | 22.23673 | 0.142671 | 27.02 |
| 300012 | 2017 | -0.42 | 0.02 | 0.693147 | 0.48045301 | 21.9807  | 0.054239 | 11.72 |
| 2475   | 2017 | -0.12 | 0.02 | 0.693147 | 0.48045301 | 24.01487 | 0.125514 | 48.17 |
| 16     | 2017 | -0.28 | 0.02 | 0.693147 | 0.48045301 | 23.88276 | 0.302158 | 21.75 |
| 300531 | 2017 | 1.782 | 0.02 | 0.693147 | 0.48045301 | 20.55932 | 0.088123 | 50.02 |
| 2837   | 2017 | 0.186 | 0.02 | 0.693147 | 0.48045301 | 20.95261 | 0.129885 | 28.23 |
| 2429   | 2017 | -0.3  | 0.02 | 0.693147 | 0.48045301 | 23.53385 | 0.073162 | 54.5  |
| 16     | 2017 | -0.53 | 0.02 | 0.693147 | 0.48045301 | 23.88276 | 0.302158 | 21.75 |
| 300232 | 2017 | 0.084 | 0.02 | 0.693147 | 0.48045301 | 22.31078 | 0.140586 | 41.38 |
| 2594   | 2017 | 0.006 | 0.02 | 0.693147 | 0.48045301 | 25.74206 | 0.082007 | 25.26 |
| 2421   | 2017 | 0.275 | 0.02 | 0.693147 | 0.48045301 | 22.42021 | 0.102082 | 18.81 |
| 27     | 2017 | -0.37 | 0.02 | 0.693147 | 0.48045301 | 25.07007 | 0.034182 | 47.82 |
| 2340   | 2017 | -0.55 | 0.02 | 0.693147 | 0.48045301 | 23.82563 | 0.082629 | 12.44 |
| 2047   | 2017 | 0.82  | 0.02 | 0.693147 | 0.48045301 | 22.84876 | 0.099929 | 24.48 |
| 2577   | 2017 | -0.18 | 0.02 | 0.693147 | 0.48045301 | 20.98663 | 0.009817 | 62.35 |
| 2482   | 2017 | 0.098 | 0.02 | 0.693147 | 0.48045301 | 23.48734 | 0.096247 | 39.71 |
| 1979   | 2017 | -0.99 | 0.02 | 0.693147 | 0.48045301 | 25.74206 | 0.161769 | 66.1  |
| 60     | 2017 | -0.72 | 0.02 | 0.693147 | 0.48045301 | 23.66078 | 0.105093 | 27.51 |
| 2213   | 2017 | 0.761 | 0.02 | 0.693147 | 0.48045301 | 20.10336 | 0.027672 | 14.56 |
| 2766   | 2017 | 0.61  | 0.02 | 0.693147 | 0.48045301 | 22.2007  | -0.01973 | 45.31 |
| 2831   | 2017 | -0.13 | 0.02 | 0.693147 | 0.48045301 | 22.91861 | 0.185639 | 52.75 |
| 2106   | 2017 | -0.5  | 0.02 | 0.693147 | 0.48045301 | 22.26482 | 0.039185 | 20.84 |
| 9      | 2017 | 0.609 | 0.02 | 0.693147 | 0.48045301 | 24.02315 | -0.0567  | 11.91 |
| 600380 | 2017 | 0.828 | 0.02 | 0.693147 | 0.48045301 | 23.82388 | 0.302158 | 47.17 |

|        |      |       |      |          |            |          |          |       |
|--------|------|-------|------|----------|------------|----------|----------|-------|
| 2139   | 2017 | 0.147 | 0.02 | 0.693147 | 0.48045301 | 21.88924 | 0.108329 | 23.24 |
| 39     | 2017 | -0.84 | 0.02 | 0.693147 | 0.48045301 | 25.59544 | 0.005707 | 58.02 |
| 2763   | 2017 | -0.82 | 0.02 | 0.693147 | 0.48045301 | 21.51149 | 0.132615 | 35.6  |
| 300543 | 2017 | -0.44 | 0.02 | 0.693147 | 0.48045301 | 20.82005 | 0.122584 | 36.12 |
| 2294   | 2017 | 1.137 | 0.02 | 0.693147 | 0.48045301 | 22.64961 | 0.233316 | 65.73 |
| 39     | 2017 | -0.45 | 0.02 | 0.693147 | 0.48045301 | 25.59544 | 0.005707 | 58.02 |
| 300134 | 2017 | 0.363 | 0.02 | 0.693147 | 0.48045301 | 22.67964 | -0.098   | 43.39 |
| 300124 | 2017 | 0.727 | 0.02 | 0.693147 | 0.48045301 | 22.92571 | 0.190616 | 18.63 |
| 39     | 2017 | -0.55 | 0.02 | 0.693147 | 0.48045301 | 25.59544 | 0.005707 | 58.02 |
| 300207 | 2017 | 0.248 | 0.02 | 0.693147 | 0.48045301 | 23.29273 | 0.183019 | 33.82 |
| 2341   | 2017 | 0.539 | 0.02 | 0.693147 | 0.48045301 | 22.36764 | 0.049358 | 25.59 |
| 300311 | 2017 | 1.407 | 0.02 | 0.693147 | 0.48045301 | 21.5513  | 0.11825  | 39.49 |
| 300207 | 2017 | -0.44 | 0.02 | 0.693147 | 0.48045301 | 23.29273 | 0.183019 | 33.82 |
| 2243   | 2017 | -0.08 | 0.02 | 0.693147 | 0.48045301 | 21.37071 | 0.033161 | 51.52 |
| 2823   | 2017 | 0.136 | 0.02 | 0.693147 | 0.48045301 | 21.39418 | 0.134302 | 32.17 |
| 300197 | 2017 | -0.47 | 0.02 | 0.693147 | 0.48045301 | 23.73369 | 0.119324 | 41.56 |
| 2733   | 2017 | 0.008 | 0.02 | 0.693147 | 0.48045301 | 21.9825  | 0.015271 | 36.26 |
| 2340   | 2017 | 0.226 | 0.02 | 0.693147 | 0.48045301 | 23.82563 | 0.082629 | 12.44 |
| 300570 | 2017 | -0.26 | 0.02 | 0.693147 | 0.48045301 | 20.95733 | 0.089072 | 16.08 |
| 2733   | 2017 | 0.67  | 0.02 | 0.693147 | 0.48045301 | 21.9825  | 0.015271 | 36.26 |
| 2813   | 2017 | 0.371 | 0.02 | 0.693147 | 0.48045301 | 21.20602 | 0.036798 | 67.97 |
| 300167 | 2017 | 0.935 | 0.02 | 0.693147 | 0.48045301 | 20.98273 | -0.01368 | 40.19 |
| 300531 | 2017 | 0.752 | 0.02 | 0.693147 | 0.48045301 | 20.55932 | 0.088123 | 50.02 |
| 2436   | 2017 | -0.52 | 0.02 | 0.693147 | 0.48045301 | 22.21287 | 0.077427 | 19.76 |
| 39     | 2017 | -0.55 | 0.02 | 0.693147 | 0.48045301 | 25.59544 | 0.005707 | 58.02 |
| 2475   | 2017 | -0.28 | 0.02 | 0.693147 | 0.48045301 | 24.01487 | 0.125514 | 48.17 |
| 78     | 2017 | 0.357 | 0.02 | 0.693147 | 0.48045301 | 24.15287 | 0.126925 | 45.96 |
| 600525 | 2017 | 0.372 | 0.02 | 0.693147 | 0.48045301 | 23.74551 | 0.147776 | 7.84  |
| 2121   | 2017 | 0.744 | 0.02 | 0.693147 | 0.48045301 | 23.45338 | 0.081888 | 43.14 |
| 2138   | 2017 | 0.444 | 0.02 | 0.693147 | 0.48045301 | 22.28526 | 0.084934 | 15.59 |
| 300311 | 2017 | 1.937 | 0.02 | 0.693147 | 0.48045301 | 21.5513  | 0.11825  | 39.49 |
| 2789   | 2017 | -0.14 | 0.02 | 0.693147 | 0.48045301 | 22.01071 | 0.077782 | 45.23 |
| 2170   | 2017 | 0.781 | 0.02 | 0.693147 | 0.48045301 | 22.25015 | -0.05874 | 28.98 |
| 2121   | 2017 | 0.803 | 0.02 | 0.693147 | 0.48045301 | 23.45338 | 0.081888 | 43.14 |
| 300044 | 2017 | 1.072 | 0.02 | 0.693147 | 0.48045301 | 22.18058 | 0.077296 | 14.65 |
| 600380 | 2017 | -0.23 | 0.02 | 0.693147 | 0.48045301 | 23.82388 | 0.302158 | 47.17 |
| 63     | 2017 | 0.253 | 0.02 | 0.693147 | 0.48045301 | 25.69282 | 0.212929 | 30.34 |
| 2594   | 2017 | -0.47 | 0.02 | 0.693147 | 0.48045301 | 25.74206 | 0.082007 | 25.26 |
| 300572 | 2017 | 0.124 | 0.02 | 0.693147 | 0.48045301 | 20.8172  | 0.141372 | 27.88 |
| 300012 | 2017 | 0.909 | 0.02 | 0.693147 | 0.48045301 | 21.9807  | 0.054239 | 11.72 |
| 300136 | 2017 | 0.692 | 0.02 | 0.693147 | 0.48045301 | 22.27999 | 0.302158 | 20.14 |
| 2518   | 2017 | -0.32 | 0.02 | 0.693147 | 0.48045301 | 22.06253 | 0.163711 | 59.06 |
| 2238   | 2017 | -0.5  | 0.02 | 0.693147 | 0.48045301 | 21.86476 | 0.088108 | 57.77 |
| 2548   | 2017 | 0.482 | 0.02 | 0.693147 | 0.48045301 | 21.97989 | 0.056841 | 39.65 |
| 2170   | 2017 | 0.781 | 0.02 | 0.693147 | 0.48045301 | 22.25015 | -0.05874 | 28.98 |
| 2137   | 2017 | -0.52 | 0.02 | 0.693147 | 0.48045301 | 21.16948 | 0.045266 | 37.99 |
| 2055   | 2017 | -0.56 | 0.02 | 0.693147 | 0.48045301 | 22.98371 | 0.052418 | 29.92 |
| 300301 | 2017 | -0.14 | 0.02 | 0.693147 | 0.48045301 | 22.05966 | 0.040474 | 21.02 |
| 2055   | 2017 | 0.575 | 0.02 | 0.693147 | 0.48045301 | 22.98371 | 0.052418 | 29.92 |
| 2294   | 2017 | 1.137 | 0.02 | 0.693147 | 0.48045301 | 22.64961 | 0.233316 | 65.73 |
| 2356   | 2017 | -0.63 | 0.02 | 0.693147 | 0.48045301 | 22.66988 | 0.10405  | 49.28 |
| 1979   | 2017 | 0.334 | 0.02 | 0.693147 | 0.48045301 | 25.74206 | 0.161769 | 66.1  |
| 2654   | 2017 | -0.38 | 0.02 | 0.693147 | 0.48045301 | 22.18356 | 0.053409 | 16.73 |
| 2681   | 2017 | -0.25 | 0.02 | 0.693147 | 0.48045301 | 22.89595 | 0.07212  | 37.7  |



|        |      |       |      |          |            |          |          |       |
|--------|------|-------|------|----------|------------|----------|----------|-------|
| 2456   | 2017 | -0.61 | 0.02 | 0.693147 | 0.48045301 | 24.15202 | 0.089338 | 19.29 |
| 300197 | 2017 | -0.62 | 0.02 | 0.693147 | 0.48045301 | 23.73369 | 0.119324 | 41.56 |
| 2831   | 2017 | -0.76 | 0.02 | 0.693147 | 0.48045301 | 22.91861 | 0.185639 | 52.75 |
| 300037 | 2017 | 0.787 | 0.02 | 0.693147 | 0.48045301 | 22.03136 | 0.116608 | 15.09 |
| 2831   | 2017 | -0.76 | 0.02 | 0.693147 | 0.48045301 | 22.91861 | 0.185639 | 52.75 |
| 55     | 2017 | 0.827 | 0.02 | 0.693147 | 0.48045301 | 22.75475 | 0.302158 | 8.72  |
| 300136 | 2017 | 0.692 | 0.02 | 0.693147 | 0.48045301 | 22.39722 | 0.302158 | 20.14 |
| 21     | 2017 | 0.125 | 0.02 | 0.693147 | 0.48045301 | 23.53264 | -0.02587 | 44.51 |
| 300457 | 2017 | -0.37 | 0.02 | 0.693147 | 0.48045301 | 21.87111 | 0.180165 | 42.07 |
| 2482   | 2017 | 0.913 | 0.02 | 0.693147 | 0.48045301 | 23.48734 | 0.096247 | 39.71 |
| 68     | 2017 | 0.026 | 0.02 | 0.693147 | 0.48045301 | 21.75421 | 0.029877 | 26.43 |
| 2301   | 2017 | -0.15 | 0.02 | 0.693147 | 0.48045301 | 22.27341 | 0.0576   | 43.14 |
| 2163   | 2017 | -0.21 | 0.02 | 0.693147 | 0.48045301 | 22.63224 | -0.07214 | 13.74 |
| 2243   | 2017 | 0.285 | 0.02 | 0.693147 | 0.48045301 | 21.37071 | 0.033161 | 51.52 |
| 2594   | 2017 | 0.854 | 0.02 | 0.693147 | 0.48045301 | 25.74206 | 0.082007 | 25.26 |
| 2289   | 2017 | 0.576 | 0.02 | 0.693147 | 0.48045301 | 20.41386 | -0.27749 | 8.42  |
| 2163   | 2017 | 0.125 | 0.02 | 0.693147 | 0.48045301 | 22.63224 | -0.07214 | 13.74 |
| 50     | 2017 | 0.527 | 0.02 | 0.693147 | 0.48045301 | 24.1128  | 0.055766 | 20.81 |
| 300012 | 2017 | -0.42 | 0.02 | 0.693147 | 0.48045301 | 21.9807  | 0.054239 | 11.72 |
| 60     | 2017 | -0.8  | 0.02 | 0.693147 | 0.48045301 | 23.66078 | 0.105093 | 27.51 |
| 600525 | 2017 | 0.482 | 0.02 | 0.693147 | 0.48045301 | 23.74551 | 0.147776 | 7.84  |
| 2161   | 2017 | 0.891 | 0.02 | 0.693147 | 0.48045301 | 21.54717 | 0.001497 | 24.39 |
| 9      | 2017 | 0.609 | 0.02 | 0.693147 | 0.48045301 | 24.02315 | -0.0567  | 11.91 |
| 2163   | 2017 | 0.208 | 0.02 | 0.693147 | 0.48045301 | 22.63224 | -0.07214 | 13.74 |
| 2672   | 2017 | 0.706 | 0.02 | 0.693147 | 0.48045301 | 22.94682 | 0.128037 | 22.53 |
| 9      | 2017 | 0.609 | 0.02 | 0.693147 | 0.48045301 | 24.02315 | -0.0567  | 11.91 |
| 2369   | 2017 | -0.39 | 0.02 | 0.693147 | 0.48045301 | 22.12726 | 0.005593 | 19.54 |
| 2289   | 2017 | 0.569 | 0.02 | 0.693147 | 0.48045301 | 20.77901 | -0.27749 | 8.42  |
| 48     | 2017 | -0.71 | 0.02 | 0.693147 | 0.48045301 | 22.08547 | -0.21255 | 31.65 |
| 600525 | 2017 | 0.068 | 0.02 | 0.693147 | 0.48045301 | 23.74551 | 0.147776 | 7.84  |
| 999    | 2017 | -0.33 | 0.02 | 0.693147 | 0.48045301 | 23.508   | 0.131014 | 63.6  |
| 2138   | 2017 | 0.307 | 0.02 | 0.693147 | 0.48045301 | 22.28526 | 0.084934 | 15.59 |
| 49     | 2017 | -0.18 | 0.02 | 0.693147 | 0.48045301 | 22.75392 | 0.251257 | 45.23 |
| 2429   | 2017 | -0.22 | 0.02 | 0.693147 | 0.48045301 | 23.53385 | 0.073162 | 54.5  |
| 2303   | 2017 | -0.29 | 0.02 | 0.693147 | 0.48045301 | 22.5035  | 0.077393 | 43.09 |
| 2303   | 2017 | -0.06 | 0.02 | 0.693147 | 0.48045301 | 22.24031 | 0.077393 | 43.09 |
| 300167 | 2017 | 0.935 | 0.02 | 0.693147 | 0.48045301 | 20.98273 | -0.01368 | 40.19 |
| 2055   | 2017 | -0.31 | 0.02 | 0.693147 | 0.48045301 | 22.98371 | 0.052418 | 29.92 |
| 2340   | 2017 | 0.618 | 0.02 | 0.693147 | 0.48045301 | 23.82563 | 0.082629 | 12.44 |
| 2782   | 2017 | -0.68 | 0.02 | 0.693147 | 0.48045301 | 20.86025 | 0.068986 | 35.56 |
| 2735   | 2017 | 0.442 | 0.02 | 0.693147 | 0.48045301 | 20.10336 | 0.07261  | 51.51 |
| 300252 | 2017 | 0.723 | 0.02 | 0.693147 | 0.48045301 | 22.49488 | 0.062486 | 34.12 |
| 2583   | 2017 | 1.188 | 0.02 | 0.693147 | 0.48045301 | 23.3573  | 0.043335 | 51.43 |
| 2139   | 2017 | 0.449 | 0.02 | 0.693147 | 0.48045301 | 21.88924 | 0.108329 | 23.24 |
| 2130   | 2017 | -0.51 | 0.02 | 0.693147 | 0.48045301 | 22.55268 | 0.060011 | 27.47 |
| 2421   | 2017 | 0.541 | 0.02 | 0.693147 | 0.48045301 | 22.42021 | 0.102082 | 18.81 |
| 2402   | 2017 | 0.072 | 0.02 | 0.693147 | 0.48045301 | 21.38511 | 0.136117 | 17.57 |
| 70     | 2017 | 0.02  | 0.02 | 0.693147 | 0.48045301 | 22.52944 | 0.05761  | 39.18 |
| 1979   | 2017 | -0.99 | 0.02 | 0.693147 | 0.48045301 | 25.74206 | 0.161769 | 66.1  |
| 2831   | 2017 | -0.32 | 0.02 | 0.693147 | 0.48045301 | 22.91861 | 0.185639 | 52.75 |
| 2660   | 2017 | -0.42 | 0.02 | 0.693147 | 0.48045301 | 21.44009 | 0.027671 | 30.59 |
| 2351   | 2017 | 0.065 | 0.02 | 0.693147 | 0.48045301 | 21.42162 | 0.064347 | 31.7  |
| 2215   | 2017 | 0.248 | 0.02 | 0.693147 | 0.48045301 | 22.23673 | 0.142671 | 27.02 |
| 999    | 2017 | 0.511 | 0.02 | 0.693147 | 0.48045301 | 23.508   | 0.131014 | 63.6  |

|        |      |       |      |          |            |          |          |       |
|--------|------|-------|------|----------|------------|----------|----------|-------|
| 2813   | 2017 | 0.43  | 0.02 | 0.693147 | 0.48045301 | 21.20602 | 0.036798 | 67.97 |
| 300130 | 2017 | 0.235 | 0.02 | 0.693147 | 0.48045301 | 22.08278 | 0.035605 | 28.87 |
| 300124 | 2017 | 0.478 | 0.02 | 0.693147 | 0.48045301 | 22.92571 | 0.190616 | 18.63 |
| 600380 | 2017 | 0.188 | 0.02 | 0.693147 | 0.48045301 | 23.82388 | 0.302158 | 47.17 |
| 999    | 2017 | 0.069 | 0.02 | 0.693147 | 0.48045301 | 23.508   | 0.131014 | 63.6  |
| 2551   | 2017 | 0.011 | 0.02 | 0.693147 | 0.48045301 | 22.1843  | 0.070767 | 39.58 |
| 300151 | 2017 | -0.53 | 0.02 | 0.693147 | 0.48045301 | 20.69812 | 0.040844 | 45.86 |
| 70     | 2017 | -0.01 | 0.02 | 0.693147 | 0.48045301 | 22.52944 | 0.05761  | 39.18 |
| 2351   | 2017 | -0.05 | 0.02 | 0.693147 | 0.48045301 | 21.42162 | 0.064347 | 31.7  |
| 300207 | 2017 | -0.44 | 0.02 | 0.693147 | 0.48045301 | 23.29273 | 0.183019 | 33.82 |
| 300042 | 2017 | -0.36 | 0.02 | 0.693147 | 0.48045301 | 20.67376 | 0.061844 | 21.63 |
| 2475   | 2017 | -0.5  | 0.02 | 0.693147 | 0.48045301 | 24.01487 | 0.125514 | 48.17 |
| 300252 | 2017 | -0.22 | 0.02 | 0.693147 | 0.48045301 | 22.49488 | 0.062486 | 34.12 |
| 69     | 2017 | -0.86 | 0.02 | 0.693147 | 0.48045301 | 25.74206 | 0.228299 | 53.47 |
| 2008   | 2017 | -0.1  | 0.02 | 0.693147 | 0.48045301 | 23.36965 | 0.234874 | 15.46 |
| 2334   | 2017 | 0.837 | 0.02 | 0.693147 | 0.48045301 | 21.89236 | 0.108504 | 17.66 |
| 50     | 2017 | 0.858 | 0.02 | 0.693147 | 0.48045301 | 24.1128  | 0.055766 | 20.81 |
| 2369   | 2017 | -0.65 | 0.02 | 0.693147 | 0.48045301 | 22.12726 | 0.005593 | 19.54 |
| 32     | 2017 | 0.117 | 0.02 | 0.693147 | 0.48045301 | 21.30479 | 0.008329 | 49.18 |
| 21     | 2017 | -0.41 | 0.02 | 0.693147 | 0.48045301 | 23.53264 | -0.02587 | 44.51 |
| 70     | 2017 | -0.14 | 0.02 | 0.693147 | 0.48045301 | 22.52944 | 0.125464 | 39.18 |
| 300546 | 2017 | 0.454 | 0.02 | 0.693147 | 0.48045301 | 20.66435 | 0.125052 | 39.25 |
| 2654   | 2017 | -0.36 | 0.02 | 0.693147 | 0.48045301 | 22.18356 | 0.053409 | 16.73 |
| 300124 | 2017 | 1.389 | 0.02 | 0.693147 | 0.48045301 | 22.92571 | 0.190616 | 18.63 |
| 300178 | 2017 | 0.479 | 0.02 | 0.693147 | 0.48045301 | 22.67691 | 0.113122 | 28.64 |
| 2672   | 2017 | -0.39 | 0.02 | 0.693147 | 0.48045301 | 22.94682 | 0.128037 | 22.53 |
| 2294   | 2017 | 1.137 | 0.02 | 0.693147 | 0.48045301 | 22.64961 | 0.233316 | 65.73 |
| 16     | 2017 | -0.15 | 0.02 | 0.693147 | 0.48045301 | 23.88276 | 0.302158 | 21.75 |
| 39     | 2017 | -0.84 | 0.02 | 0.693147 | 0.48045301 | 25.59544 | 0.005707 | 58.02 |
| 2313   | 2017 | 0.188 | 0.02 | 0.693147 | 0.48045301 | 22.32659 | 0.048983 | 24.69 |
| 2227   | 2017 | 1.589 | 0.02 | 0.693147 | 0.48045301 | 20.79148 | 0.018525 | 57.57 |
| 300124 | 2017 | 0.727 | 0.02 | 0.693147 | 0.48045301 | 22.92571 | 0.190616 | 18.63 |
| 2816   | 2017 | -0.51 | 0.02 | 0.693147 | 0.48045301 | 20.10336 | 0.030885 | 12.43 |
| 2548   | 2017 | 0.137 | 0.02 | 0.693147 | 0.48045301 | 21.97989 | 0.056841 | 39.65 |
| 300178 | 2017 | 0.479 | 0.02 | 0.693147 | 0.48045301 | 22.32668 | 0.113122 | 28.64 |
| 2388   | 2017 | -0.54 | 0.02 | 0.693147 | 0.48045301 | 21.30378 | 0.053824 | 46.42 |
| 60     | 2017 | -0.18 | 0.02 | 0.693147 | 0.48045301 | 23.66078 | 0.074366 | 27.51 |
| 2551   | 2017 | -0.46 | 0.02 | 0.693147 | 0.48045301 | 22.1843  | 0.070767 | 39.58 |
| 2528   | 2017 | 0.875 | 0.02 | 0.693147 | 0.48045301 | 22.20819 | 0.043314 | 30.7  |
| 39     | 2017 | -0.84 | 0.02 | 0.693147 | 0.48045301 | 25.59544 | 0.005707 | 58.02 |
| 2313   | 2017 | 0.161 | 0.02 | 0.693147 | 0.48045301 | 22.32659 | 0.048983 | 24.69 |
| 300197 | 2017 | 0.263 | 0.02 | 0.693147 | 0.48045301 | 23.73369 | 0.119324 | 41.56 |
| 555    | 2017 | -0.06 | 0.02 | 0.693147 | 0.48045301 | 23.09536 | 0.064195 | 40.43 |
| 2402   | 2017 | -0.23 | 0.02 | 0.693147 | 0.48045301 | 21.38511 | 0.136117 | 17.57 |
| 2008   | 2017 | 0.124 | 0.02 | 0.693147 | 0.48045301 | 23.36965 | 0.234874 | 15.46 |
| 300389 | 2017 | -0.19 | 0.02 | 0.693147 | 0.48045301 | 21.2574  | 0.099564 | 25.81 |
| 2314   | 2017 | -0.93 | 0.02 | 0.693147 | 0.48045301 | 23.97586 | 0.088439 | 50.03 |
| 45     | 2017 | -0.26 | 0.02 | 0.693147 | 0.48045301 | 22.15734 | 0.020909 | 45.78 |
| 2587   | 2017 | 0.021 | 0.02 | 0.693147 | 0.48045301 | 21.30742 | 0.113127 | 27.72 |
| 12     | 2017 | -0.45 | 0.02 | 0.693147 | 0.48045301 | 23.03624 | 0.064394 | 14.84 |
| 2218   | 2017 | -0.46 | 0.02 | 0.693147 | 0.48045301 | 22.47249 | 0.057583 | 32.55 |
| 300531 | 2017 | 0.698 | 0.02 | 0.693147 | 0.48045301 | 20.55932 | 0.088123 | 50.02 |
| 2548   | 2017 | 0.482 | 0.02 | 0.693147 | 0.48045301 | 21.97989 | 0.056841 | 39.65 |
| 1979   | 2017 | -0.55 | 0.02 | 0.693147 | 0.48045301 | 25.74206 | 0.161769 | 66.1  |

|        |      |       |      |          |            |          |          |       |
|--------|------|-------|------|----------|------------|----------|----------|-------|
| 63     | 2017 | 1.578 | 0.02 | 0.693147 | 0.48045301 | 25.69282 | 0.212929 | 30.34 |
| 1979   | 2017 | -0.4  | 0.02 | 0.693147 | 0.48045301 | 25.74206 | 0.161769 | 66.1  |
| 2191   | 2017 | -0.15 | 0.02 | 0.693147 | 0.48045301 | 22.81806 | 0.100535 | 30.97 |
| 45     | 2017 | -0.26 | 0.02 | 0.693147 | 0.48045301 | 21.74271 | 0.014353 | 45.78 |
| 2008   | 2017 | -0.1  | 0.02 | 0.693147 | 0.48045301 | 23.36965 | 0.234874 | 15.46 |
| 2475   | 2017 | -0.24 | 0.02 | 0.693147 | 0.48045301 | 24.01487 | 0.125514 | 48.17 |
| 50     | 2017 | 0.468 | 0.02 | 0.693147 | 0.48045301 | 24.1128  | 0.055766 | 20.81 |
| 2577   | 2017 | -0.33 | 0.02 | 0.693147 | 0.48045301 | 20.98663 | 0.009817 | 62.35 |
| 2139   | 2017 | 0.721 | 0.02 | 0.693147 | 0.48045301 | 21.88924 | 0.108329 | 23.24 |
| 300252 | 2017 | -0.51 | 0.02 | 0.693147 | 0.48045301 | 22.20555 | 0.062486 | 34.12 |
| 2594   | 2017 | -0.19 | 0.02 | 0.693147 | 0.48045301 | 25.74206 | 0.082007 | 25.26 |
| 2215   | 2017 | 0.579 | 0.02 | 0.693147 | 0.48045301 | 22.23673 | 0.142671 | 27.02 |
| 2170   | 2017 | 0.244 | 0.02 | 0.693147 | 0.48045301 | 22.22287 | -0.05874 | 28.98 |
| 2170   | 2017 | 0.244 | 0.02 | 0.693147 | 0.48045301 | 22.25015 | -0.05874 | 28.98 |
| 2766   | 2017 | 0.61  | 0.02 | 0.693147 | 0.48045301 | 22.2007  | -0.01973 | 45.31 |
| 2429   | 2017 | -0.19 | 0.02 | 0.693147 | 0.48045301 | 23.53385 | 0.073162 | 54.5  |
| 2429   | 2017 | -0.17 | 0.02 | 0.693147 | 0.48045301 | 23.29684 | 0.073162 | 54.5  |
| 2256   | 2017 | -0.17 | 0.02 | 0.693147 | 0.48045301 | 22.07361 | 0.065891 | 26.67 |
| 2340   | 2017 | 0.332 | 0.02 | 0.693147 | 0.48045301 | 23.82563 | 0.082629 | 12.44 |
| 300047 | 2017 | 1.248 | 0.02 | 0.693147 | 0.48045301 | 22.032   | 0.061558 | 10.15 |
| 300199 | 2017 | 0.407 | 0.02 | 0.693147 | 0.48045301 | 22.3906  | 0.084874 | 25.36 |
| 300348 | 2017 | 1.339 | 0.02 | 0.693147 | 0.48045301 | 21.10676 | 0.080644 | 21.89 |
| 2518   | 2017 | 0.135 | 0.02 | 0.693147 | 0.48045301 | 22.06253 | 0.163711 | 59.06 |
| 9      | 2017 | 0.609 | 0.02 | 0.693147 | 0.48045301 | 23.23845 | -0.0567  | 11.91 |
| 300264 | 2017 | 2.389 | 0.02 | 0.693147 | 0.48045301 | 20.70239 | -0.14594 | 29.5  |
| 2340   | 2017 | -0.55 | 0.02 | 0.693147 | 0.48045301 | 23.82563 | 0.082629 | 12.44 |
| 2475   | 2017 | -0.5  | 0.02 | 0.693147 | 0.48045301 | 24.01487 | 0.125514 | 48.17 |
| 2303   | 2017 | -0.67 | 0.02 | 0.693147 | 0.48045301 | 22.5035  | 0.077393 | 43.09 |
| 2138   | 2017 | 0.444 | 0.02 | 0.693147 | 0.48045301 | 22.28526 | 0.084934 | 15.59 |
| 40     | 2017 | -0.01 | 0.02 | 0.693147 | 0.48045301 | 24.08723 | 0.04671  | 30.98 |
| 2436   | 2017 | -0.17 | 0.02 | 0.693147 | 0.48045301 | 22.21287 | 0.077427 | 19.76 |
| 2456   | 2017 | -0.43 | 0.02 | 0.693147 | 0.48045301 | 24.15202 | 0.089338 | 19.29 |
| 300047 | 2017 | 1.248 | 0.02 | 0.693147 | 0.48045301 | 22.032   | 0.061558 | 10.15 |
| 2660   | 2017 | -0.42 | 0.02 | 0.693147 | 0.48045301 | 21.22043 | 0.027671 | 30.59 |
| 300269 | 2017 | -0.35 | 0.02 | 0.693147 | 0.48045301 | 22.75694 | 0.021003 | 18.81 |
| 300565 | 2017 | -0.13 | 0.02 | 0.693147 | 0.48045301 | 20.82339 | 0.078829 | 14.14 |
| 39     | 2017 | -0.84 | 0.02 | 0.693147 | 0.48045301 | 25.59544 | 0.005707 | 58.02 |
| 2316   | 2017 | 0.851 | 0.02 | 0.693147 | 0.48045301 | 21.83763 | 0.046491 | 19.84 |
| 2356   | 2017 | -0.78 | 0.02 | 0.693147 | 0.48045301 | 22.66988 | 0.10405  | 49.28 |
| 39     | 2017 | -0.55 | 0.02 | 0.693147 | 0.48045301 | 25.59544 | 0.005707 | 58.02 |
| 300545 | 2017 | 0.436 | 0.02 | 0.693147 | 0.48045301 | 20.76294 | 0.110794 | 64.05 |
| 2518   | 2017 | -0.32 | 0.02 | 0.693147 | 0.48045301 | 22.03295 | 0.163711 | 59.06 |
| 300232 | 2017 | -0.29 | 0.02 | 0.693147 | 0.48045301 | 22.31078 | 0.140586 | 41.38 |
| 12     | 2017 | 0.514 | 0.02 | 0.693147 | 0.48045301 | 23.69547 | 0.064394 | 14.84 |
| 70     | 2017 | -0.04 | 0.02 | 0.693147 | 0.48045301 | 22.52944 | 0.05761  | 39.18 |
| 555    | 2017 | -0.06 | 0.02 | 0.693147 | 0.48045301 | 23.09536 | 0.064195 | 40.43 |
| 2672   | 2017 | -0.35 | 0.02 | 0.693147 | 0.48045301 | 22.94682 | 0.128037 | 22.53 |
| 21     | 2017 | -0.14 | 0.02 | 0.693147 | 0.48045301 | 23.53264 | -0.02587 | 44.51 |
| 39     | 2017 | -0.84 | 0.02 | 0.693147 | 0.48045301 | 25.59544 | 0.005707 | 58.02 |
| 2047   | 2017 | -0.43 | 0.02 | 0.693147 | 0.48045301 | 22.84876 | 0.099929 | 24.48 |
| 2528   | 2017 | 0.875 | 0.02 | 0.693147 | 0.48045301 | 22.20819 | 0.043314 | 30.7  |
| 2681   | 2017 | -0.25 | 0.02 | 0.693147 | 0.48045301 | 22.63711 | 0.07212  | 37.7  |
| 2456   | 2017 | 0.714 | 0.02 | 0.693147 | 0.48045301 | 24.15202 | 0.089338 | 19.29 |
| 300124 | 2017 | 0.449 | 0.02 | 0.693147 | 0.48045301 | 22.92571 | 0.190616 | 18.63 |

|        |      |       |      |          |            |          |          |       |
|--------|------|-------|------|----------|------------|----------|----------|-------|
| 9      | 2017 | -0.72 | 0.02 | 0.693147 | 0.48045301 | 24.02315 | -0.0567  | 11.91 |
| 2587   | 2017 | -0.26 | 0.02 | 0.693147 | 0.48045301 | 21.30742 | 0.113127 | 27.72 |
| 2775   | 2017 | -0.15 | 0.02 | 0.693147 | 0.48045301 | 21.70726 | 0.161419 | 20.65 |
| 999    | 2017 | -0.64 | 0.02 | 0.693147 | 0.48045301 | 23.508   | 0.131014 | 63.6  |
| 27     | 2017 | -0.94 | 0.02 | 0.693147 | 0.48045301 | 25.07007 | 0.034182 | 47.82 |
| 300572 | 2017 | 0.124 | 0.02 | 0.693147 | 0.48045301 | 20.8172  | 0.141372 | 27.88 |
| 300241 | 2017 | -0.42 | 0.02 | 0.693147 | 0.48045301 | 21.59838 | 0.108298 | 24.8  |
| 2191   | 2017 | -0.02 | 0.02 | 0.693147 | 0.48045301 | 22.64044 | 0.100535 | 30.97 |
| 2436   | 2017 | 0.486 | 0.02 | 0.693147 | 0.48045301 | 22.21287 | 0.077427 | 19.76 |
| 19     | 2017 | 0.542 | 0.02 | 0.693147 | 0.48045301 | 20.79129 | -0.0636  | 19.09 |
| 66     | 2017 | 0.553 | 0.02 | 0.693147 | 0.48045301 | 22.96293 | 0.05082  | 40.91 |
| 55     | 2017 | -0.5  | 0.02 | 0.693147 | 0.48045301 | 22.75475 | 0.302158 | 8.72  |
| 2008   | 2017 | -0.1  | 0.02 | 0.693147 | 0.48045301 | 23.36965 | 0.234874 | 15.46 |
| 2139   | 2017 | 0.445 | 0.02 | 0.693147 | 0.48045301 | 21.88924 | 0.108329 | 23.24 |
| 300136 | 2017 | -0.14 | 0.02 | 0.693147 | 0.48045301 | 22.27999 | 0.302158 | 20.14 |
| 70     | 2017 | -0.07 | 0.02 | 0.693147 | 0.48045301 | 22.52944 | 0.05761  | 39.18 |
| 2782   | 2017 | -0.68 | 0.02 | 0.693147 | 0.48045301 | 20.86025 | 0.068986 | 35.56 |
| 300162 | 2017 | 0.114 | 0.02 | 0.693147 | 0.48045301 | 21.02774 | 0.019384 | 22.54 |
| 19     | 2017 | 0.542 | 0.02 | 0.693147 | 0.48045301 | 20.79129 | -0.0636  | 19.09 |
| 16     | 2017 | -0.66 | 0.02 | 0.693147 | 0.48045301 | 23.88276 | 0.302158 | 21.75 |
| 2055   | 2017 | -0.31 | 0.02 | 0.693147 | 0.48045301 | 22.39864 | 0.052418 | 29.92 |
| 2587   | 2017 | -0.26 | 0.02 | 0.693147 | 0.48045301 | 21.30742 | 0.113127 | 27.72 |
| 9      | 2017 | -0.72 | 0.02 | 0.693147 | 0.48045301 | 24.02315 | -0.0567  | 11.91 |
| 300333 | 2017 | 2.597 | 0.02 | 0.693147 | 0.48045301 | 20.6092  | 0.042243 | 22.23 |
| 300319 | 2017 | 0.649 | 0.02 | 0.693147 | 0.48045301 | 21.85769 | -0.18104 | 27.06 |
| 34     | 2017 | 0.406 | 0.02 | 0.693147 | 0.48045301 | 23.91264 | 0.215374 | 23.66 |
| 300207 | 2017 | 0.269 | 0.02 | 0.693147 | 0.48045301 | 23.25866 | 0.183019 | 33.82 |
| 9      | 2017 | -0.19 | 0.02 | 0.693147 | 0.48045301 | 24.02315 | -0.0567  | 11.91 |
| 300506 | 2017 | -0.56 | 0.02 | 0.693147 | 0.48045301 | 21.2001  | 0.234924 | 50.63 |
| 50     | 2017 | 0.851 | 0.02 | 0.693147 | 0.48045301 | 24.1128  | 0.055766 | 20.81 |
| 2369   | 2017 | -0.39 | 0.02 | 0.693147 | 0.48045301 | 22.12726 | 0.005593 | 19.54 |
| 999    | 2017 | 0.069 | 0.02 | 0.693147 | 0.48045301 | 23.508   | 0.131014 | 63.6  |
| 2161   | 2017 | 0.394 | 0.02 | 0.693147 | 0.48045301 | 21.54717 | 0.001497 | 24.39 |
| 9      | 2017 | -0.24 | 0.02 | 0.693147 | 0.48045301 | 24.02315 | -0.0567  | 11.91 |
| 39     | 2017 | -0.84 | 0.02 | 0.693147 | 0.48045301 | 25.59544 | 0.005707 | 58.02 |
| 2137   | 2017 | -0.5  | 0.02 | 0.693147 | 0.48045301 | 21.45448 | 0.045266 | 37.99 |
| 300112 | 2017 | -0.28 | 0.02 | 0.693147 | 0.48045301 | 20.9023  | 0.048673 | 21.76 |
| 2436   | 2017 | 0.284 | 0.02 | 0.693147 | 0.48045301 | 22.21287 | 0.077427 | 19.76 |
| 2781   | 2017 | 0.5   | 0.02 | 0.693147 | 0.48045301 | 22.19136 | 0.076614 | 42.3  |
| 300134 | 2017 | -0.3  | 0.02 | 0.693147 | 0.48045301 | 22.67964 | -0.098   | 43.39 |
| 2191   | 2017 | 0.193 | 0.02 | 0.693147 | 0.48045301 | 22.81806 | 0.100535 | 30.97 |
| 600525 | 2017 | 1.144 | 0.02 | 0.693147 | 0.48045301 | 23.74551 | 0.147776 | 7.84  |
| 999    | 2017 | 0.069 | 0.02 | 0.693147 | 0.48045301 | 23.508   | 0.131014 | 63.6  |
| 9      | 2017 | -0.05 | 0.02 | 0.693147 | 0.48045301 | 24.02315 | -0.0567  | 11.91 |
| 2168   | 2017 | 0.145 | 0.02 | 0.693147 | 0.48045301 | 21.87502 | -0.07608 | 10.02 |
| 2482   | 2017 | -0.21 | 0.02 | 0.693147 | 0.48045301 | 23.48734 | 0.096247 | 39.71 |
| 300115 | 2017 | 0.864 | 0.02 | 0.693147 | 0.48045301 | 23.03417 | 0.126642 | 42.72 |
| 2733   | 2017 | 0.008 | 0.02 | 0.693147 | 0.48045301 | 21.9825  | 0.015271 | 36.26 |
| 2388   | 2017 | -0.54 | 0.02 | 0.693147 | 0.48045301 | 21.30378 | 0.053824 | 46.42 |
| 27     | 2017 | -0.37 | 0.02 | 0.693147 | 0.48045301 | 25.07007 | 0.034182 | 47.82 |
| 2733   | 2017 | -0.65 | 0.02 | 0.693147 | 0.48045301 | 21.9825  | 0.015271 | 36.26 |
| 16     | 2017 | 0.084 | 0.02 | 0.693147 | 0.48045301 | 23.88276 | 0.302158 | 21.75 |
| 2456   | 2017 | -0.14 | 0.02 | 0.693147 | 0.48045301 | 24.15202 | 0.089338 | 19.29 |
| 2831   | 2017 | -0.52 | 0.02 | 0.693147 | 0.48045301 | 22.91861 | 0.185639 | 52.75 |

|        |      |       |      |          |            |          |          |       |
|--------|------|-------|------|----------|------------|----------|----------|-------|
| 2314   | 2017 | -0.93 | 0.02 | 0.693147 | 0.48045301 | 23.97586 | 0.088439 | 50.03 |
| 2008   | 2017 | 0.316 | 0.02 | 0.693147 | 0.48045301 | 23.36965 | 0.234874 | 15.46 |
| 2191   | 2017 | 0.203 | 0.02 | 0.693147 | 0.48045301 | 22.81806 | 0.100535 | 30.97 |
| 300085 | 2017 | 0.997 | 0.02 | 0.693147 | 0.48045301 | 21.52009 | 0.018351 | 18.98 |
| 300047 | 2017 | 1.248 | 0.02 | 0.693147 | 0.48045301 | 22.032   | 0.061558 | 10.15 |
| 78     | 2017 | 0.357 | 0.02 | 0.693147 | 0.48045301 | 24.15287 | 0.21147  | 45.96 |
| 999    | 2017 | 0.511 | 0.02 | 0.693147 | 0.48045301 | 23.508   | 0.131014 | 63.6  |
| 600525 | 2017 | 0.482 | 0.02 | 0.693147 | 0.48045301 | 23.74551 | 0.147776 | 7.84  |
| 16     | 2017 | -0.82 | 0.02 | 0.693147 | 0.48045301 | 23.88276 | 0.302158 | 21.75 |
| 300197 | 2017 | 0.705 | 0.02 | 0.693147 | 0.48045301 | 23.73369 | 0.119324 | 41.56 |
| 9      | 2017 | 0.167 | 0.02 | 0.693147 | 0.48045301 | 24.02315 | -0.0567  | 11.91 |
| 2105   | 2017 | -0.72 | 0.02 | 0.693147 | 0.48045301 | 20.88488 | 0.075183 | 41.93 |
| 39     | 2017 | -0.84 | 0.02 | 0.693147 | 0.48045301 | 25.59544 | 0.005707 | 58.02 |
| 2215   | 2017 | 0.579 | 0.02 | 0.693147 | 0.48045301 | 22.23673 | 0.142671 | 27.02 |
| 12     | 2017 | 0.377 | 0.02 | 0.693147 | 0.48045301 | 23.69547 | 0.064394 | 14.84 |
| 300052 | 2017 | 0.869 | 0.02 | 0.693147 | 0.48045301 | 20.85417 | 0.062799 | 27.86 |
| 2456   | 2017 | 0.714 | 0.02 | 0.693147 | 0.48045301 | 24.15202 | 0.089338 | 19.29 |
| 9      | 2017 | -0.72 | 0.02 | 0.693147 | 0.48045301 | 24.02315 | -0.0567  | 11.91 |
| 600525 | 2017 | 0.072 | 0.02 | 0.693147 | 0.48045301 | 23.74551 | 0.147776 | 7.84  |
| 2416   | 2017 | 0.338 | 0.02 | 0.693147 | 0.48045301 | 23.04343 | 0.07184  | 52.5  |
| 999    | 2017 | -0.81 | 0.02 | 0.693147 | 0.48045301 | 23.508   | 0.131014 | 63.6  |
| 2672   | 2017 | -0.4  | 0.02 | 0.693147 | 0.48045301 | 22.94682 | 0.128037 | 22.53 |
| 2724   | 2017 | -0.31 | 0.02 | 0.693147 | 0.48045301 | 20.93108 | 0.086153 | 70.42 |
| 300241 | 2017 | -0.73 | 0.02 | 0.693147 | 0.48045301 | 21.48288 | 0.108298 | 24.8  |
| 2456   | 2017 | 4E-04 | 0.02 | 0.693147 | 0.48045301 | 24.15202 | 0.089338 | 19.29 |
| 2402   | 2017 | -0.57 | 0.02 | 0.693147 | 0.48045301 | 21.38511 | 0.136117 | 17.57 |
| 2301   | 2017 | 0.586 | 0.02 | 0.693147 | 0.48045301 | 22.27341 | 0.0576   | 43.14 |
| 2733   | 2017 | 0.008 | 0.02 | 0.693147 | 0.48045301 | 21.9825  | 0.015271 | 36.26 |
| 2551   | 2017 | -0.33 | 0.02 | 0.693147 | 0.48045301 | 22.1843  | 0.070767 | 39.58 |
| 2528   | 2017 | 0.875 | 0.02 | 0.693147 | 0.48045301 | 22.20819 | 0.043314 | 30.7  |
| 300568 | 2017 | 0.911 | 0.02 | 0.693147 | 0.48045301 | 21.58767 | 0.068613 | 26.2  |
| 9      | 2017 | -0.72 | 0.02 | 0.693147 | 0.48045301 | 24.02315 | -0.0567  | 11.91 |
| 2008   | 2017 | 1.228 | 0.02 | 0.693147 | 0.48045301 | 23.36965 | 0.234874 | 15.46 |
| 32     | 2017 | -0.36 | 0.02 | 0.693147 | 0.48045301 | 21.37941 | 0.008329 | 49.18 |
| 2191   | 2017 | -0.06 | 0.02 | 0.693147 | 0.48045301 | 22.81806 | 0.100535 | 30.97 |
| 2334   | 2017 | 0.27  | 0.02 | 0.693147 | 0.48045301 | 21.89236 | 0.108504 | 17.66 |
| 9      | 2017 | -0.05 | 0.02 | 0.693147 | 0.48045301 | 24.02315 | -0.0567  | 11.91 |
| 2660   | 2017 | -0.42 | 0.02 | 0.693147 | 0.48045301 | 21.44009 | 0.027671 | 30.59 |
| 300151 | 2017 | -0.41 | 0.02 | 0.693147 | 0.48045301 | 20.69812 | 0.040844 | 45.86 |
| 39     | 2017 | -0.84 | 0.02 | 0.693147 | 0.48045301 | 25.59544 | 0.005707 | 58.02 |
| 2475   | 2017 | -0.44 | 0.02 | 0.693147 | 0.48045301 | 24.01487 | 0.125514 | 48.17 |
| 2456   | 2017 | -0.35 | 0.02 | 0.693147 | 0.48045301 | 24.15202 | 0.089338 | 19.29 |
| 2340   | 2017 | 0.224 | 0.02 | 0.693147 | 0.48045301 | 23.82563 | 0.082629 | 12.44 |
| 2008   | 2017 | 1.228 | 0.02 | 0.693147 | 0.48045301 | 23.36965 | 0.234874 | 15.46 |
| 999    | 2017 | -0.19 | 0.02 | 0.693147 | 0.48045301 | 23.508   | 0.131014 | 63.6  |
| 2008   | 2017 | -0.1  | 0.02 | 0.693147 | 0.48045301 | 23.36965 | 0.234874 | 15.46 |
| 39     | 2017 | -0.76 | 0.02 | 0.693147 | 0.48045301 | 25.59544 | 0.005707 | 58.02 |
| 2301   | 2017 | -0.15 | 0.02 | 0.693147 | 0.48045301 | 22.27341 | 0.0576   | 43.14 |
| 2163   | 2017 | 0.456 | 0.02 | 0.693147 | 0.48045301 | 21.7265  | -0.07214 | 13.74 |
| 300134 | 2017 | 0.363 | 0.02 | 0.693147 | 0.48045301 | 22.67964 | -0.098   | 43.39 |
| 2197   | 2017 | -0.38 | 0.02 | 0.693147 | 0.48045301 | 22.39496 | 0.010473 | 20.32 |
| 2786   | 2017 | -0.57 | 0.02 | 0.693147 | 0.48045301 | 22.07202 | 0.056555 | 35.74 |
| 2672   | 2017 | -0.39 | 0.02 | 0.693147 | 0.48045301 | 22.94682 | 0.128037 | 22.53 |
| 2137   | 2017 | -0.48 | 0.02 | 0.693147 | 0.48045301 | 21.45448 | 0.045266 | 37.99 |

|        |      |       |      |          |            |          |          |       |
|--------|------|-------|------|----------|------------|----------|----------|-------|
| 600525 | 2017 | 0.119 | 0.02 | 0.693147 | 0.48045301 | 23.74551 | 0.147776 | 7.84  |
| 19     | 2017 | 0.542 | 0.02 | 0.693147 | 0.48045301 | 20.79129 | -0.0636  | 19.09 |
| 55     | 2017 | -0.5  | 0.02 | 0.693147 | 0.48045301 | 22.75475 | 0.302158 | 8.72  |
| 2008   | 2017 | 0.234 | 0.02 | 0.693147 | 0.48045301 | 23.36965 | 0.234874 | 15.46 |
| 2130   | 2017 | -0.2  | 0.02 | 0.693147 | 0.48045301 | 22.55268 | 0.060011 | 27.47 |
| 2672   | 2017 | -0.1  | 0.02 | 0.693147 | 0.48045301 | 22.94682 | 0.128037 | 22.53 |
| 600525 | 2017 | 0.482 | 0.02 | 0.693147 | 0.48045301 | 23.74551 | 0.147776 | 7.84  |
| 300269 | 2017 | -0.42 | 0.02 | 0.693147 | 0.48045301 | 22.75694 | 0.021003 | 18.81 |
| 2786   | 2017 | -0.44 | 0.02 | 0.693147 | 0.48045301 | 22.07202 | 0.056555 | 35.74 |
| 60     | 2017 | 0.523 | 0.02 | 0.693147 | 0.48045301 | 23.66078 | 0.105093 | 27.51 |
| 300124 | 2017 | 0.375 | 0.02 | 0.693147 | 0.48045301 | 22.92571 | 0.190616 | 18.63 |
| 60     | 2017 | 0.523 | 0.02 | 0.693147 | 0.48045301 | 23.66078 | 0.105093 | 27.51 |
| 2831   | 2017 | -0.76 | 0.02 | 0.693147 | 0.48045301 | 22.91861 | 0.185639 | 52.75 |
| 2163   | 2017 | -0.05 | 0.02 | 0.693147 | 0.48045301 | 22.63224 | -0.07214 | 13.74 |
| 2369   | 2017 | -0.1  | 0.02 | 0.693147 | 0.48045301 | 22.12726 | 0.005593 | 19.54 |
| 2137   | 2017 | -0.52 | 0.02 | 0.693147 | 0.48045301 | 21.45448 | 0.045266 | 37.99 |
| 1979   | 2017 | -0.99 | 0.02 | 0.693147 | 0.48045301 | 25.74206 | 0.161769 | 66.1  |
| 2352   | 2017 | 0.438 | 0.02 | 0.693147 | 0.48045301 | 24.77783 | 0.145172 | 61.25 |
| 300199 | 2017 | 0.545 | 0.02 | 0.693147 | 0.48045301 | 22.3906  | 0.084874 | 25.36 |
| 300269 | 2017 | -0.42 | 0.02 | 0.693147 | 0.48045301 | 22.75694 | 0.021003 | 18.81 |
| 2303   | 2017 | -0.2  | 0.02 | 0.693147 | 0.48045301 | 22.5035  | 0.077393 | 43.09 |
| 300037 | 2017 | 1.008 | 0.02 | 0.693147 | 0.48045301 | 22.03136 | 0.116608 | 15.09 |
| 2672   | 2017 | -0.53 | 0.02 | 0.693147 | 0.48045301 | 22.94682 | 0.128037 | 22.53 |
| 66     | 2017 | -0.17 | 0.02 | 0.693147 | 0.48045301 | 23.44467 | 0.05082  | 40.91 |
| 70     | 2017 | -0.01 | 0.02 | 0.693147 | 0.48045301 | 22.52944 | 0.05761  | 39.18 |
| 2402   | 2017 | 0.76  | 0.02 | 0.693147 | 0.48045301 | 21.38511 | 0.136117 | 17.57 |
| 2008   | 2017 | 1.062 | 0.02 | 0.693147 | 0.48045301 | 23.36965 | 0.234874 | 15.46 |
| 300484 | 2017 | 0.626 | 0.02 | 0.693147 | 0.48045301 | 20.83789 | 0.181517 | 15.36 |
| 2388   | 2017 | -0.54 | 0.02 | 0.693147 | 0.48045301 | 21.30378 | 0.053824 | 46.42 |
| 600380 | 2017 | 0.45  | 0.02 | 0.693147 | 0.48045301 | 23.82388 | 0.302158 | 47.17 |
| 2256   | 2017 | -0.17 | 0.02 | 0.693147 | 0.48045301 | 22.07361 | 0.065891 | 26.67 |
| 2429   | 2017 | -0.34 | 0.02 | 0.693147 | 0.48045301 | 23.53385 | 0.073162 | 54.5  |
| 39     | 2017 | -0.84 | 0.02 | 0.693147 | 0.48045301 | 25.59544 | 0.005707 | 58.02 |
| 2475   | 2017 | -0.3  | 0.02 | 0.693147 | 0.48045301 | 24.01487 | 0.125514 | 48.17 |
| 300252 | 2017 | -0.6  | 0.02 | 0.693147 | 0.48045301 | 22.49488 | 0.062486 | 34.12 |
| 2356   | 2017 | -0.52 | 0.02 | 0.693147 | 0.48045301 | 22.66988 | 0.10405  | 49.28 |
| 55     | 2017 | -0.36 | 0.02 | 0.693147 | 0.48045301 | 22.75475 | 0.302158 | 8.72  |
| 2008   | 2017 | 0.124 | 0.02 | 0.693147 | 0.48045301 | 23.36965 | 0.234874 | 15.46 |
| 300532 | 2017 | 0.573 | 0.02 | 0.693147 | 0.48045301 | 20.9863  | 0.118284 | 46.12 |
| 2340   | 2017 | 0.618 | 0.02 | 0.693147 | 0.48045301 | 23.36595 | 0.082629 | 12.44 |
| 2008   | 2017 | 0.33  | 0.02 | 0.693147 | 0.48045301 | 23.36965 | 0.234874 | 15.46 |
| 32     | 2017 | -0.77 | 0.02 | 0.693147 | 0.48045301 | 21.37941 | 0.008329 | 49.18 |
| 300042 | 2017 | -0.36 | 0.02 | 0.693147 | 0.48045301 | 20.654   | 0.061844 | 21.63 |
| 300112 | 2017 | -0.21 | 0.02 | 0.693147 | 0.48045301 | 20.9023  | 0.048673 | 21.76 |
| 2766   | 2017 | 0.61  | 0.02 | 0.693147 | 0.48045301 | 22.2007  | -0.01973 | 45.31 |
| 2594   | 2017 | -0.47 | 0.02 | 0.693147 | 0.48045301 | 25.74206 | 0.082007 | 25.26 |
| 300232 | 2017 | -0.38 | 0.02 | 0.693147 | 0.48045301 | 22.31078 | 0.140586 | 41.38 |
| 300232 | 2017 | -0.33 | 0.02 | 0.693147 | 0.48045301 | 22.31078 | 0.140586 | 41.38 |
| 9      | 2017 | -0.5  | 0.02 | 0.693147 | 0.48045301 | 24.02315 | -0.0567  | 11.91 |
| 2313   | 2017 | 1.096 | 0.02 | 0.693147 | 0.48045301 | 22.32659 | 0.048983 | 24.69 |
| 603160 | 2017 | 1.94  | 0.02 | 0.693147 | 0.48045301 | 22.20894 | 0.254448 | 48.41 |
| 300012 | 2017 | -0.42 | 0.02 | 0.693147 | 0.48045301 | 21.9807  | 0.054239 | 11.72 |
| 78     | 2017 | -0.6  | 0.02 | 0.693147 | 0.48045301 | 24.15287 | 0.21147  | 45.96 |
| 300301 | 2017 | -0.57 | 0.02 | 0.693147 | 0.48045301 | 21.81662 | 0.040474 | 21.02 |

|        |      |       |      |          |            |          |          |       |
|--------|------|-------|------|----------|------------|----------|----------|-------|
| 2518   | 2017 | 0.267 | 0.02 | 0.693147 | 0.48045301 | 22.06253 | 0.163711 | 59.06 |
| 2594   | 2017 | -0.29 | 0.02 | 0.693147 | 0.48045301 | 25.74206 | 0.082007 | 25.26 |
| 2551   | 2017 | -0.33 | 0.02 | 0.693147 | 0.48045301 | 22.1843  | 0.070767 | 39.58 |
| 2052   | 2017 | 0.141 | 0.02 | 0.693147 | 0.48045301 | 21.50893 | 0.009644 | 16.5  |
| 300037 | 2017 | 0.478 | 0.02 | 0.693147 | 0.48045301 | 22.03136 | 0.116608 | 15.09 |
| 603118 | 2017 | 0.211 | 0.02 | 0.693147 | 0.48045301 | 22.70093 | 0.022881 | 24.98 |
| 2823   | 2017 | -0.13 | 0.02 | 0.693147 | 0.48045301 | 21.27024 | 0.134302 | 32.17 |
| 39     | 2017 | -0.84 | 0.02 | 0.693147 | 0.48045301 | 25.59544 | 0.005707 | 58.02 |
| 2301   | 2017 | -0.15 | 0.02 | 0.693147 | 4.80E-01   | 22.27341 | 0.0576   | 43.14 |
| 12     | 2017 | -0.81 | 0.02 | 0.693147 | 4.80E-01   | 23.69547 | 0.064394 | 14.84 |
| 2816   | 2017 | -0.51 | 0.02 | 0.693147 | 4.80E-01   | 20.39021 | 0.030885 | 12.43 |
| 2835   | 2017 | 1.011 | 0.02 | 0.693147 | 4.80E-01   | 20.4903  | 0.031427 | 32.03 |
| 2775   | 2017 | 0.168 | 0.02 | 0.693147 | 4.80E-01   | 21.70726 | 0.161419 | 20.65 |
| 300197 | 2017 | -0.62 | 0.02 | 0.693147 | 4.80E-01   | 23.73369 | 0.119324 | 41.56 |
| 2210   | 2017 | -0.5  | 0.02 | 0.693147 | 4.80E-01   | 23.79078 | 0.07385  | 48.48 |
| 300052 | 2017 | 0.869 | 0.02 | 0.693147 | 4.80E-01   | 20.85417 | 0.062799 | 27.86 |
| 555    | 2017 | 1.079 | 0.02 | 0.693147 | 4.80E-01   | 23.09536 | 0.064195 | 40.43 |
| 603118 | 2017 | 0.421 | 0.02 | 0.693147 | 4.80E-01   | 22.70093 | 0.022881 | 24.98 |
| 2416   | 2017 | 0.338 | 0.02 | 0.693147 | 4.80E-01   | 23.24747 | 0.07184  | 52.5  |
| 12     | 2017 | -0.09 | 0.02 | 0.693147 | 0.48045301 | 23.69547 | 0.064394 | 14.84 |
| 2551   | 2017 | -0.05 | 0.02 | 0.693147 | 0.48045301 | 21.66173 | 0.070767 | 39.58 |
| 26     | 2017 | -0.91 | 0.02 | 0.693147 | 0.48045301 | 21.99857 | 0.057787 | 37.15 |
| 600525 | 2017 | -0.18 | 0.02 | 0.693147 | 0.48045301 | 23.74551 | 0.147776 | 7.84  |
| 2681   | 2017 | -0.29 | 0.02 | 0.693147 | 0.48045301 | 22.89595 | 0.07212  | 37.7  |
| 300303 | 2017 | -0.55 | 0.02 | 0.693147 | 0.48045301 | 21.92271 | 0.024323 | 22.92 |
| 2137   | 2017 | -0.33 | 0.02 | 0.693147 | 0.48045301 | 21.45448 | 0.045266 | 37.99 |
| 32     | 2017 | -0.77 | 0.02 | 0.693147 | 0.48045301 | 21.37941 | 0.008329 | 49.18 |
| 300115 | 2017 | 0.645 | 0.02 | 0.693147 | 0.48045301 | 23.03417 | 0.126642 | 42.72 |
| 2548   | 2017 | 0.482 | 0.02 | 0.693147 | 0.48045301 | 21.97989 | 0.056841 | 39.65 |
| 2751   | 2017 | 0.248 | 0.02 | 0.693147 | 0.48045301 | 21.09209 | 0.053866 | 27.94 |
| 2475   | 2017 | -0.5  | 0.02 | 0.693147 | 0.48045301 | 24.01487 | 0.125514 | 48.17 |
| 2781   | 2017 | -0.56 | 0.02 | 0.693147 | 0.48045301 | 22.19136 | 0.076614 | 42.3  |
| 2436   | 2017 | 0.32  | 0.02 | 0.693147 | 0.48045301 | 22.21287 | 0.077427 | 19.76 |
| 2775   | 2017 | -0.19 | 0.02 | 0.693147 | 0.48045301 | 21.71801 | 0.161419 | 20.65 |
| 2191   | 2017 | -0.15 | 0.02 | 0.693147 | 0.48045301 | 22.81806 | 0.100535 | 30.97 |
| 12     | 2017 | -0.3  | 0.02 | 0.693147 | 0.48045301 | 23.69547 | 0.064394 | 14.84 |
| 2782   | 2017 | -0.68 | 0.02 | 0.693147 | 0.48045301 | 20.86025 | 0.068986 | 35.56 |
| 70     | 2017 | -0.36 | 0.02 | 0.693147 | 0.48045301 | 21.88702 | 0.05761  | 39.18 |
| 2782   | 2017 | -0.68 | 0.02 | 0.693147 | 0.48045301 | 20.86025 | 0.068986 | 35.56 |
| 2429   | 2017 | -0.66 | 0.02 | 0.693147 | 0.48045301 | 23.53385 | 0.073162 | 54.5  |
| 55     | 2017 | -0.36 | 0.02 | 0.693147 | 0.48045301 | 21.67037 | 0.302158 | 8.72  |
| 69     | 2017 | -0.86 | 0.02 | 0.693147 | 0.48045301 | 25.74206 | 0.228299 | 53.47 |
| 300206 | 2017 | 0.838 | 0.02 | 0.693147 | 0.48045301 | 21.07889 | 0.030303 | 20.86 |
| 300131 | 2017 | -0.69 | 0.02 | 0.693147 | 0.48045301 | 22.35561 | 0.085853 | 26.55 |
| 2733   | 2017 | 0.081 | 0.02 | 0.693147 | 0.48045301 | 21.70655 | 0.015271 | 36.26 |
| 603118 | 2017 | 0.204 | 0.02 | 0.693147 | 0.48045301 | 22.70093 | 0.022881 | 24.98 |
| 2551   | 2017 | -0.33 | 0.02 | 0.693147 | 0.48045301 | 22.1843  | 0.070767 | 39.58 |
| 300319 | 2017 | 0.649 | 0.02 | 0.693147 | 0.48045301 | 21.85769 | -0.18104 | 27.06 |
| 2008   | 2017 | 0.566 | 0.02 | 0.693147 | 0.48045301 | 23.36965 | 0.234874 | 15.46 |
| 300333 | 2017 | 2.597 | 0.02 | 0.693147 | 0.48045301 | 20.6092  | 0.042243 | 22.23 |
| 300134 | 2017 | 0.48  | 0.02 | 0.693147 | 0.48045301 | 22.67964 | -0.098   | 43.39 |
| 2609   | 2017 | 1.072 | 0.02 | 0.693147 | 0.48045301 | 21.6906  | 0.093088 | 35.37 |
| 300269 | 2017 | -0.42 | 0.02 | 0.693147 | 0.48045301 | 22.75694 | 0.021003 | 18.81 |
| 2402   | 2017 | 0.189 | 0.02 | 0.693147 | 0.48045301 | 21.38511 | 0.136117 | 17.57 |

|        |      |       |      |          |            |          |          |       |
|--------|------|-------|------|----------|------------|----------|----------|-------|
| 2660   | 2017 | -0.08 | 0.02 | 0.693147 | 0.48045301 | 21.44009 | 0.027671 | 30.59 |
| 39     | 2017 | -0.55 | 0.02 | 0.693147 | 0.48045301 | 25.59544 | 0.005707 | 58.02 |
| 2008   | 2017 | 0.786 | 0.02 | 0.693147 | 0.48045301 | 23.36965 | 0.234874 | 15.46 |
| 2170   | 2017 | 0.781 | 0.02 | 0.693147 | 0.48045301 | 22.25015 | -0.05874 | 28.98 |
| 39     | 2017 | -0.84 | 0.02 | 0.693147 | 0.48045301 | 25.59544 | 0.005707 | 58.02 |
| 2786   | 2017 | -0.58 | 0.02 | 0.693147 | 0.48045301 | 21.87128 | 0.056555 | 35.74 |
| 2163   | 2017 | -0.21 | 0.02 | 0.693147 | 0.48045301 | 22.63224 | -0.07214 | 13.74 |
| 2121   | 2017 | 0.67  | 0.02 | 0.693147 | 0.48045301 | 23.45338 | 0.081888 | 43.14 |
| 2813   | 2017 | -0.11 | 0.02 | 0.693147 | 0.48045301 | 21.20602 | 0.036798 | 67.97 |
| 63     | 2017 | 0.253 | 0.02 | 0.693147 | 0.48045301 | 25.69282 | 0.212929 | 30.34 |
| 300037 | 2017 | 0.478 | 0.02 | 0.693147 | 0.48045301 | 22.03136 | 0.116608 | 15.09 |
| 300012 | 2017 | 0.635 | 0.02 | 0.693147 | 0.48045301 | 21.9807  | 0.054239 | 11.72 |
| 2294   | 2017 | 1.137 | 0.02 | 0.693147 | 0.48045301 | 22.64961 | 0.233316 | 65.73 |
| 26     | 2017 | -0.91 | 0.02 | 0.693147 | 0.48045301 | 21.99857 | 0.057787 | 37.15 |
| 2672   | 2017 | -0.35 | 0.02 | 0.693147 | 0.48045301 | 22.94682 | 0.128037 | 22.53 |
| 300543 | 2017 | -0.28 | 0.02 | 0.693147 | 0.48045301 | 20.82005 | 0.122584 | 36.12 |
| 2766   | 2017 | 0.61  | 0.02 | 0.693147 | 0.48045301 | 22.2007  | -0.01973 | 45.31 |
| 2660   | 2017 | -0.42 | 0.02 | 0.693147 | 0.48045301 | 21.44009 | 0.027671 | 30.59 |
| 300154 | 2017 | 0.174 | 0.02 | 0.693147 | 0.48045301 | 21.34753 | 0.052606 | 39.52 |
| 300167 | 2017 | 0.935 | 0.02 | 0.693147 | 0.48045301 | 20.98273 | -0.01368 | 40.19 |
| 12     | 2017 | -0.57 | 0.02 | 0.693147 | 0.48045301 | 23.69547 | 0.064394 | 14.84 |
| 66     | 2017 | -0.17 | 0.02 | 0.693147 | 0.48045301 | 23.44467 | 0.05082  | 40.91 |
| 2789   | 2017 | 0.088 | 0.02 | 0.693147 | 4.80E-01   | 22.02612 | 0.077782 | 45.23 |
| 2823   | 2017 | -0.13 | 0.02 | 0.693147 | 4.80E-01   | 21.39418 | 0.134302 | 32.17 |
| 2161   | 2017 | 0.835 | 0.02 | 0.693147 | 4.80E-01   | 21.48949 | 0.001497 | 24.39 |
| 2577   | 2017 | -0.33 | 0.02 | 0.693147 | 4.80E-01   | 20.98663 | 0.009817 | 62.35 |
| 2163   | 2017 | -0.26 | 0.02 | 0.693147 | 4.80E-01   | 22.63224 | -0.07214 | 13.74 |
| 2402   | 2017 | -0.57 | 0.02 | 0.693147 | 4.80E-01   | 21.38511 | 0.136117 | 17.57 |
| 300576 | 2017 | 0.556 | 0.02 | 0.693147 | 4.80E-01   | 20.10336 | 0.09041  | 13.6  |
| 2660   | 2017 | -0.22 | 0.02 | 0.693147 | 4.80E-01   | 21.44009 | 0.027671 | 30.59 |
| 300232 | 2017 | -0.55 | 0.02 | 0.693147 | 4.80E-01   | 22.31078 | 0.140586 | 41.38 |
| 63     | 2017 | 0.982 | 0.02 | 0.693147 | 4.80E-01   | 25.69282 | 0.212929 | 30.34 |
| 600525 | 2017 | 1.144 | 0.02 | 0.693147 | 4.80E-01   | 23.74551 | 0.147776 | 7.84  |
| 60     | 2017 | -0.23 | 0.02 | 0.693147 | 4.80E-01   | 23.66078 | 0.105093 | 27.51 |
| 16     | 2017 | -0.82 | 0.02 | 0.693147 | 0.48045301 | 23.88276 | 0.302158 | 21.75 |
| 300556 | 2017 | -0.04 | 0.02 | 0.693147 | 0.48045301 | 20.18637 | 0.032428 | 30.06 |
| 2831   | 2017 | -0.38 | 0.02 | 0.693147 | 0.48045301 | 22.91861 | 0.185639 | 52.75 |
| 2654   | 2017 | -0.21 | 0.02 | 0.693147 | 0.48045301 | 22.18356 | 0.053409 | 16.73 |
| 39     | 2017 | -0.55 | 0.02 | 0.693147 | 0.48045301 | 25.59544 | 0.005707 | 58.02 |
| 2130   | 2017 | 0.63  | 0.02 | 0.693147 | 0.48045301 | 22.55268 | 0.060011 | 27.47 |
| 2672   | 2017 | 0.706 | 0.02 | 0.693147 | 0.48045301 | 22.72917 | 0.128037 | 22.53 |
| 2340   | 2017 | 0.618 | 0.02 | 0.693147 | 0.48045301 | 23.82563 | 0.082629 | 12.44 |
| 12     | 2017 | -0.09 | 0.02 | 0.693147 | 0.48045301 | 23.69547 | 0.064394 | 14.84 |
| 2618   | 2017 | 1.37  | 0.02 | 0.693147 | 0.48045301 | 21.67523 | 0.014989 | 28.03 |
| 300252 | 2017 | -0.22 | 0.02 | 0.693147 | 0.48045301 | 22.49488 | 0.062486 | 34.12 |
| 300301 | 2017 | -0.58 | 0.02 | 0.693147 | 0.48045301 | 22.05966 | 0.040474 | 21.02 |
| 300124 | 2017 | 0.449 | 0.02 | 0.693147 | 0.48045301 | 22.42377 | 0.190616 | 18.63 |
| 12     | 2017 | -0.33 | 0.02 | 0.693147 | 0.48045301 | 23.69547 | 0.064394 | 14.84 |
| 2055   | 2017 | -0.56 | 0.02 | 0.693147 | 0.48045301 | 22.98371 | 0.052418 | 29.92 |
| 2334   | 2017 | 0.459 | 0.02 | 0.693147 | 0.48045301 | 21.89236 | 0.108504 | 17.66 |
| 2351   | 2017 | -0.23 | 0.02 | 0.693147 | 0.48045301 | 21.42162 | 0.064347 | 31.7  |
| 2402   | 2017 | 0.263 | 0.02 | 0.693147 | 0.48045301 | 21.38511 | 0.136117 | 17.57 |
| 300252 | 2017 | -0.31 | 0.02 | 0.693147 | 0.48045301 | 22.49488 | 0.062486 | 34.12 |
| 2243   | 2017 | 0.285 | 0.02 | 0.693147 | 0.48045301 | 21.22325 | 0.033161 | 51.52 |



|        |      |       |      |          |            |          |          |       |
|--------|------|-------|------|----------|------------|----------|----------|-------|
| 2816   | 2017 | -0.51 | 0.02 | 0.693147 | 0.48045301 | 20.39021 | 0.030885 | 12.43 |
| 2137   | 2017 | -0.52 | 0.02 | 0.693147 | 0.48045301 | 21.45448 | 0.045266 | 37.99 |
| 600380 | 2017 | -0.5  | 0.02 | 0.693147 | 0.48045301 | 23.82388 | 0.302158 | 47.17 |
| 300136 | 2017 | 0.176 | 0.02 | 0.693147 | 0.48045301 | 22.39722 | 0.302158 | 20.14 |
| 2775   | 2017 | 0.168 | 0.02 | 0.693147 | 0.48045301 | 21.70726 | 0.161419 | 20.65 |
| 63     | 2017 | 0.982 | 0.02 | 0.693147 | 0.48045301 | 25.62435 | 0.212929 | 30.34 |
| 2482   | 2017 | -0.21 | 0.02 | 0.693147 | 0.48045301 | 23.48734 | 0.096247 | 39.71 |
| 16     | 2017 | -0.82 | 0.02 | 0.693147 | 0.48045301 | 23.85714 | 0.302158 | 21.75 |
| 16     | 2017 | -0.69 | 0.02 | 0.693147 | 0.48045301 | 23.88276 | 0.302158 | 21.75 |
| 300556 | 2017 | 0.577 | 0.02 | 0.693147 | 0.48045301 | 20.18637 | 0.032428 | 30.06 |
| 39     | 2017 | -0.84 | 0.02 | 0.693147 | 0.48045301 | 25.59544 | 0.005707 | 58.02 |
| 2475   | 2017 | -0.5  | 0.02 | 0.693147 | 0.48045301 | 24.01487 | 0.125514 | 48.17 |
| 2314   | 2017 | -0.93 | 0.02 | 0.693147 | 0.48045301 | 23.97586 | 0.088439 | 50.03 |
| 16     | 2017 | -0.82 | 0.02 | 0.693147 | 0.48045301 | 23.88276 | 0.302158 | 21.75 |
| 2170   | 2017 | 0.781 | 0.02 | 0.693147 | 0.48045301 | 22.25015 | -0.05874 | 28.98 |
| 2340   | 2017 | 0.442 | 0.02 | 0.693147 | 0.48045301 | 23.82563 | 0.082629 | 12.44 |
| 300252 | 2017 | 0.205 | 0.02 | 0.693147 | 0.48045301 | 22.49488 | 0.062486 | 34.12 |
| 300252 | 2017 | -0.05 | 0.02 | 0.693147 | 0.48045301 | 22.49488 | 0.062486 | 34.12 |
| 2577   | 2017 | -0.18 | 0.02 | 0.693147 | 0.48045301 | 20.98663 | 0.009817 | 62.35 |
| 2334   | 2017 | 0.601 | 0.02 | 0.693147 | 0.48045301 | 21.89236 | 0.108504 | 17.66 |
| 2314   | 2017 | -0.93 | 0.02 | 0.693147 | 0.48045301 | 23.97586 | 0.088439 | 50.03 |
| 2620   | 2017 | 0.168 | 0.02 | 0.693147 | 0.48045301 | 22.1481  | 0.064293 | 21.05 |
| 2106   | 2017 | -0.5  | 0.02 | 0.693147 | 0.48045301 | 21.96656 | 0.039185 | 20.84 |
| 27     | 2017 | -0.24 | 0.02 | 0.693147 | 0.48045301 | 25.07007 | 0.034182 | 47.82 |
| 39     | 2017 | -0.84 | 0.02 | 0.693147 | 0.48045301 | 25.59544 | 0.005707 | 58.02 |
| 2325   | 2017 | 0.153 | 0.02 | 0.693147 | 0.48045301 | 23.11238 | 0.033944 | 30.01 |
| 2161   | 2017 | 0.891 | 0.02 | 0.693147 | 0.48045301 | 21.54717 | 0.001497 | 24.39 |
| 300162 | 2017 | -0.5  | 0.02 | 0.693147 | 0.48045301 | 21.02774 | 0.019384 | 22.54 |
| 2813   | 2017 | 0.331 | 0.02 | 0.693147 | 0.48045301 | 21.20602 | 0.036798 | 67.97 |
| 300037 | 2017 | 0.743 | 0.02 | 0.693147 | 0.48045301 | 22.03136 | 0.116608 | 15.09 |
| 9      | 2017 | -0.15 | 0.02 | 0.693147 | 0.48045301 | 24.02315 | -0.0567  | 11.91 |
| 66     | 2017 | 0.082 | 0.02 | 0.693147 | 0.48045301 | 23.44467 | 0.05082  | 40.91 |
| 2813   | 2017 | -0.11 | 0.02 | 0.693147 | 0.48045301 | 21.20602 | 0.036798 | 67.97 |
| 2813   | 2017 | 0.331 | 0.02 | 0.693147 | 0.48045301 | 21.20602 | 0.036798 | 67.97 |
| 62     | 2017 | 0.56  | 0.02 | 0.693147 | 0.48045301 | 22.87101 | 0.102065 | 70.76 |
| 2303   | 2017 | -0.2  | 0.02 | 0.693147 | 0.48045301 | 22.5035  | 0.077393 | 43.09 |
| 2594   | 2017 | -0.47 | 0.02 | 0.693147 | 0.48045301 | 25.74206 | 0.082007 | 25.26 |
| 2130   | 2017 | -0.3  | 0.02 | 0.693147 | 0.48045301 | 22.55268 | 0.060011 | 27.47 |
| 300112 | 2017 | -0.28 | 0.02 | 0.693147 | 0.48045301 | 20.60352 | 0.048673 | 21.76 |
| 2815   | 2017 | 0.682 | 0.02 | 0.693147 | 0.48045301 | 22.32125 | 0.175815 | 60.63 |
| 2138   | 2017 | 0.304 | 0.02 | 0.693147 | 0.48045301 | 22.28526 | 0.084934 | 15.59 |
| 2815   | 2017 | 0.682 | 0.02 | 0.693147 | 0.48045301 | 22.32125 | 0.175815 | 60.63 |
| 55     | 2017 | -0.36 | 0.02 | 0.693147 | 0.48045301 | 22.75475 | 0.302158 | 8.72  |
| 2816   | 2017 | -0.51 | 0.02 | 0.693147 | 0.48045301 | 20.39021 | 0.030885 | 12.43 |
| 2551   | 2017 | -0.46 | 0.02 | 0.693147 | 0.48045301 | 22.1843  | 0.070767 | 39.58 |
| 300576 | 2017 | 0.556 | 0.02 | 0.693147 | 0.48045301 | 20.10336 | 0.09041  | 13.6  |
| 300457 | 2017 | -0.27 | 0.02 | 0.693147 | 0.48045301 | 21.87111 | 0.180165 | 42.07 |
| 300227 | 2017 | 0.717 | 0.02 | 0.693147 | 0.48045301 | 20.78301 | 0.082602 | 18.86 |
| 2421   | 2017 | 0.541 | 0.02 | 0.693147 | 0.48045301 | 22.42021 | 0.102082 | 18.81 |
| 9      | 2017 | 0.543 | 0.02 | 0.693147 | 0.48045301 | 24.02315 | -0.0567  | 11.91 |
| 34     | 2017 | -0.31 | 0.02 | 0.693147 | 0.48045301 | 23.91264 | 0.215374 | 23.66 |
| 2388   | 2017 | -0.54 | 0.02 | 0.693147 | 0.48045301 | 21.30378 | 0.053824 | 46.42 |
| 300531 | 2017 | 0.698 | 0.02 | 0.693147 | 0.48045301 | 20.55932 | 0.088123 | 50.02 |
| 300112 | 2017 | -0.28 | 0.02 | 0.693147 | 0.48045301 | 20.9023  | 0.048673 | 21.76 |

|        |      |       |      |          |            |          |          |       |
|--------|------|-------|------|----------|------------|----------|----------|-------|
| 55     | 2017 | -0.36 | 0.02 | 0.693147 | 0.48045301 | 22.75475 | 0.302158 | 8.72  |
| 2548   | 2017 | -0.84 | 0.02 | 0.693147 | 0.48045301 | 21.87381 | 0.056841 | 39.65 |
| 60     | 2017 | -0.14 | 0.02 | 0.693147 | 0.48045301 | 23.66078 | 0.105093 | 27.51 |
| 2352   | 2017 | -0.42 | 0.02 | 0.693147 | 0.48045301 | 24.72487 | 0.145172 | 61.25 |
| 300264 | 2017 | 2.389 | 0.02 | 0.693147 | 0.48045301 | 20.62967 | -0.14594 | 29.5  |
| 26     | 2017 | -0.59 | 0.02 | 0.693147 | 0.48045301 | 21.99857 | 0.057787 | 37.15 |
| 2587   | 2017 | -0.26 | 0.02 | 0.693147 | 0.48045301 | 20.9341  | 0.113127 | 27.72 |
| 2238   | 2017 | -0.5  | 0.02 | 0.693147 | 0.48045301 | 22.07978 | 0.088108 | 57.77 |
| 2587   | 2017 | -0.26 | 0.02 | 0.693147 | 0.48045301 | 21.30742 | 0.113127 | 27.72 |
| 2475   | 2017 | -0.5  | 0.02 | 0.693147 | 0.48045301 | 24.01487 | 0.125514 | 48.17 |
| 39     | 2017 | -0.84 | 0.02 | 0.693147 | 0.48045301 | 25.59544 | 0.005707 | 58.02 |
| 21     | 2017 | -0.07 | 0.02 | 0.693147 | 0.48045301 | 23.53264 | 0.096799 | 44.51 |
| 2294   | 2017 | 1.137 | 0.02 | 0.693147 | 0.48045301 | 22.61053 | 0.233316 | 65.73 |
| 2168   | 2017 | 0.145 | 0.02 | 0.693147 | 0.48045301 | 21.89703 | -0.07608 | 10.02 |
| 2837   | 2017 | 0.587 | 0.02 | 0.693147 | 0.48045301 | 20.95261 | 0.129885 | 28.23 |
| 78     | 2017 | 0.357 | 0.02 | 0.693147 | 0.48045301 | 24.15287 | 0.21147  | 45.96 |
| 300124 | 2017 | 0.375 | 0.02 | 0.693147 | 0.48045301 | 22.92571 | 0.190616 | 18.63 |
| 39     | 2017 | -0.18 | 0.02 | 0.693147 | 0.48045301 | 25.59544 | 0.005707 | 58.02 |
| 2256   | 2017 | -0.17 | 0.02 | 0.693147 | 0.48045301 | 22.07361 | 0.065891 | 26.67 |
| 300112 | 2017 | -0.28 | 0.02 | 0.693147 | 0.48045301 | 20.9023  | 0.048673 | 21.76 |
| 2789   | 2017 | 0.088 | 0.02 | 0.693147 | 0.48045301 | 22.01071 | 0.077782 | 45.23 |
| 2577   | 2017 | 0.23  | 0.02 | 0.693147 | 0.48045301 | 20.98663 | 0.009817 | 62.35 |
| 300484 | 2017 | 0.626 | 0.02 | 0.693147 | 0.48045301 | 20.83789 | 0.181517 | 15.36 |
| 39     | 2017 | -0.55 | 0.02 | 0.693147 | 0.48045301 | 25.59544 | 0.005707 | 58.02 |
| 2548   | 2017 | 0.482 | 0.02 | 0.693147 | 0.48045301 | 21.97989 | 0.056841 | 39.65 |
| 2008   | 2017 | 0.456 | 0.02 | 0.693147 | 0.48045301 | 23.36965 | 0.234874 | 15.46 |
| 39     | 2017 | -0.84 | 0.02 | 0.693147 | 0.48045301 | 25.59544 | 0.005707 | 58.02 |
| 12     | 2017 | -0.31 | 0.02 | 0.693147 | 0.48045301 | 23.69547 | 0.064394 | 14.84 |
| 2475   | 2017 | -0.5  | 0.02 | 0.693147 | 0.48045301 | 24.01487 | 0.125514 | 48.17 |
| 2055   | 2017 | -0.27 | 0.02 | 0.693147 | 0.48045301 | 22.98371 | 0.052418 | 29.92 |
| 300531 | 2017 | 0.773 | 0.02 | 0.693147 | 0.48045301 | 20.55932 | 0.088123 | 50.02 |
| 300227 | 2017 | -0.48 | 0.02 | 0.693147 | 0.48045301 | 20.78301 | 0.082602 | 18.86 |
| 2548   | 2017 | 0.482 | 0.02 | 0.693147 | 0.48045301 | 21.97989 | 0.056841 | 39.65 |
| 300532 | 2017 | 0.655 | 0.02 | 0.693147 | 0.48045301 | 20.9863  | 0.118284 | 46.12 |
| 39     | 2017 | -0.55 | 0.02 | 0.693147 | 0.48045301 | 25.59544 | 0.005707 | 58.02 |
| 300124 | 2017 | 1.011 | 0.02 | 0.693147 | 0.48045301 | 22.92571 | 0.190616 | 18.63 |
| 2482   | 2017 | -0.21 | 0.02 | 0.693147 | 0.48045301 | 23.48734 | 0.096247 | 39.71 |
| 2766   | 2017 | 0.83  | 0.02 | 0.693147 | 0.48045301 | 22.2007  | -0.01973 | 45.31 |
| 62     | 2017 | 0.56  | 0.02 | 0.693147 | 0.48045301 | 22.87101 | 0.102065 | 70.76 |
| 2356   | 2017 | -0.63 | 0.02 | 0.693147 | 0.48045301 | 22.66988 | 0.10405  | 49.28 |
| 2816   | 2017 | -0.51 | 0.02 | 0.693147 | 0.48045301 | 20.39021 | 0.030885 | 12.43 |
| 600525 | 2017 | 1.144 | 0.02 | 0.693147 | 0.48045301 | 23.74551 | 0.147776 | 7.84  |
| 27     | 2017 | 0.385 | 0.02 | 0.693147 | 0.48045301 | 25.07007 | 0.034182 | 47.82 |
| 300178 | 2017 | 0.479 | 0.02 | 0.693147 | 0.48045301 | 22.67691 | 0.113122 | 28.64 |
| 2341   | 2017 | 0.768 | 0.02 | 0.693147 | 0.48045301 | 22.59578 | 0.049358 | 25.59 |
| 2475   | 2017 | -0.5  | 0.02 | 0.693147 | 0.48045301 | 24.01487 | 0.125514 | 48.17 |
| 2551   | 2017 | -0.63 | 0.02 | 0.693147 | 0.48045301 | 22.1843  | 0.070767 | 39.58 |
| 300167 | 2017 | 0.935 | 0.02 | 0.693147 | 0.48045301 | 20.98273 | -0.01368 | 40.19 |
| 2215   | 2017 | 0.579 | 0.02 | 0.693147 | 0.48045301 | 22.23673 | 0.142671 | 27.02 |
| 2213   | 2017 | 0.761 | 0.02 | 0.693147 | 0.48045301 | 20.10336 | 0.027672 | 14.56 |
| 2813   | 2017 | -0.03 | 0.02 | 0.693147 | 0.48045301 | 21.20602 | 0.036798 | 67.97 |
| 300241 | 2017 | -0.37 | 0.02 | 0.693147 | 0.48045301 | 21.59838 | 0.108298 | 24.8  |
| 300154 | 2017 | -0.32 | 0.02 | 0.693147 | 0.48045301 | 21.34753 | 0.052606 | 39.52 |
| 300134 | 2017 | 0.044 | 0.02 | 0.693147 | 0.48045301 | 22.67964 | -0.098   | 43.39 |

|        |      |       |      |          |            |          |          |       |
|--------|------|-------|------|----------|------------|----------|----------|-------|
| 300565 | 2017 | -0.13 | 0.02 | 0.693147 | 0.48045301 | 20.82339 | 0.078829 | 14.14 |
| 55     | 2017 | -0.36 | 0.02 | 0.693147 | 0.48045301 | 22.75475 | 0.302158 | 8.72  |
| 300134 | 2017 | 0.363 | 0.02 | 0.693147 | 0.48045301 | 22.67964 | -0.098   | 43.39 |
| 2289   | 2017 | 0.59  | 0.02 | 0.693147 | 0.48045301 | 20.41386 | -0.27749 | 8.42  |
| 2359   | 2017 | -0.53 | 0.02 | 0.693147 | 0.48045301 | 23.25736 | 0.035655 | 35.15 |
| 21     | 2017 | -0.41 | 0.02 | 0.693147 | 0.48045301 | 23.53264 | -0.02587 | 44.51 |
| 300232 | 2017 | -0.4  | 0.02 | 0.693147 | 0.48045301 | 21.9866  | 0.140586 | 41.38 |
| 39     | 2017 | -0.84 | 0.02 | 0.693147 | 0.48045301 | 25.59544 | 0.005707 | 58.02 |
| 2766   | 2017 | 0.482 | 0.02 | 0.693147 | 0.48045301 | 22.2007  | -0.01973 | 45.31 |
| 39     | 2017 | -0.55 | 0.02 | 0.693147 | 4.80E-01   | 25.59544 | 0.005707 | 58.02 |
| 68     | 2017 | 0.525 | 0.02 | 0.693147 | 4.80E-01   | 21.75421 | 0.029877 | 26.43 |
| 603118 | 2017 | 0.421 | 0.02 | 0.693147 | 4.80E-01   | 22.70093 | 0.022881 | 24.98 |
| 21     | 2017 | -0.24 | 0.02 | 0.693147 | 4.80E-01   | 23.53264 | -0.02587 | 44.51 |
| 2139   | 2017 | 0.721 | 0.02 | 0.693147 | 4.80E-01   | 21.88924 | 0.108329 | 23.24 |
| 999    | 2017 | -0.64 | 0.02 | 0.693147 | 4.80E-01   | 23.508   | 0.131014 | 63.6  |
| 300506 | 2017 | -0.56 | 0.02 | 0.693147 | 4.80E-01   | 21.2001  | 0.234924 | 50.63 |
| 2369   | 2017 | -0.1  | 0.02 | 0.693147 | 4.80E-01   | 22.12726 | 0.005593 | 19.54 |
| 300457 | 2017 | -0.04 | 0.02 | 0.693147 | 4.80E-01   | 21.87111 | 0.180165 | 42.07 |
| 69     | 2017 | -0.86 | 0.02 | 0.693147 | 0.48045301 | 25.74206 | 0.142319 | 53.47 |
| 300207 | 2017 | 0.089 | 0.02 | 0.693147 | 0.48045301 | 23.29273 | 0.183019 | 33.82 |
| 2316   | 2017 | 0.851 | 0.02 | 0.693147 | 0.48045301 | 21.57287 | 0.046491 | 19.84 |
| 63     | 2017 | 1.313 | 0.02 | 0.693147 | 0.48045301 | 25.69282 | 0.212929 | 30.34 |
| 39     | 2017 | -0.76 | 0.02 | 0.693147 | 0.48045301 | 25.59544 | 0.005707 | 58.02 |
| 66     | 2017 | -0.17 | 0.02 | 0.693147 | 0.48045301 | 23.44467 | 0.05082  | 40.91 |
| 300124 | 2017 | 0.185 | 0.02 | 0.693147 | 0.48045301 | 22.92571 | 0.190616 | 18.63 |
| 2766   | 2017 | 0.61  | 0.02 | 0.693147 | 0.48045301 | 22.2007  | -0.01973 | 45.31 |
| 2356   | 2017 | -0.52 | 0.02 | 0.693147 | 0.48045301 | 22.06627 | 0.10405  | 49.28 |
| 2775   | 2017 | 0.168 | 0.02 | 0.693147 | 0.48045301 | 21.70726 | 0.161419 | 20.65 |
| 48     | 2017 | -0.71 | 0.02 | 0.693147 | 0.48045301 | 21.9703  | -0.19578 | 31.65 |
| 2008   | 2017 | 0.345 | 0.02 | 0.693147 | 0.48045301 | 23.36965 | 0.234874 | 15.46 |
| 300484 | 2017 | 0.626 | 0.02 | 0.693147 | 0.48045301 | 20.84114 | 0.181517 | 15.36 |
| 2313   | 2017 | 0.219 | 0.02 | 0.693147 | 0.48045301 | 22.32659 | 0.048983 | 24.69 |
| 999    | 2017 | 0.511 | 0.02 | 0.693147 | 0.48045301 | 23.508   | 0.131014 | 63.6  |
| 300130 | 2017 | 0.529 | 0.02 | 0.693147 | 0.48045301 | 22.08278 | 0.035605 | 28.87 |
| 2238   | 2017 | -0.5  | 0.02 | 0.693147 | 0.48045301 | 22.07978 | 0.088108 | 57.77 |
| 300227 | 2017 | -0.48 | 0.02 | 0.693147 | 0.48045301 | 20.78301 | 0.082602 | 18.86 |
| 2551   | 2017 | -0.33 | 0.02 | 0.693147 | 0.48045301 | 22.1843  | 0.070767 | 39.58 |
| 2618   | 2017 | 1.37  | 0.02 | 0.693147 | 0.48045301 | 21.67523 | 0.014989 | 28.03 |
| 2215   | 2017 | 0.579 | 0.02 | 0.693147 | 0.48045301 | 22.23673 | 0.142671 | 27.02 |
| 2594   | 2017 | -0.47 | 0.02 | 0.693147 | 0.48045301 | 25.74206 | 0.082007 | 25.26 |
| 39     | 2017 | -0.84 | 0.02 | 0.693147 | 0.48045301 | 25.59544 | 0.005707 | 58.02 |
| 300167 | 2017 | 0.935 | 0.02 | 0.693147 | 0.48045301 | 20.98273 | -0.01368 | 40.19 |
| 2475   | 2017 | -0.02 | 0.02 | 0.693147 | 0.48045301 | 24.01487 | 0.125514 | 48.17 |
| 2482   | 2017 | -0.21 | 0.02 | 0.693147 | 0.48045301 | 23.48734 | 0.096247 | 39.71 |
| 2436   | 2017 | 0.298 | 0.02 | 0.693147 | 0.48045301 | 22.21287 | 0.077427 | 19.76 |
| 2482   | 2017 | 0.184 | 0.02 | 0.693147 | 0.48045301 | 23.48734 | 0.096247 | 39.71 |
| 2052   | 2017 | 0.633 | 0.02 | 0.693147 | 0.48045301 | 21.31936 | 0.009644 | 16.5  |
| 300052 | 2017 | 0.869 | 0.02 | 0.693147 | 0.48045301 | 20.85417 | 0.062799 | 27.86 |
| 2313   | 2017 | 0.163 | 0.02 | 0.693147 | 0.48045301 | 22.32659 | 0.048983 | 24.69 |
| 300012 | 2017 | -0.42 | 0.02 | 0.693147 | 0.48045301 | 21.9807  | 0.054239 | 11.72 |
| 39     | 2017 | -0.55 | 0.02 | 0.693147 | 0.48045301 | 25.59544 | 0.005707 | 58.02 |
| 2429   | 2017 | -0.22 | 0.02 | 0.693147 | 0.48045301 | 23.53385 | 0.073162 | 54.5  |
| 2672   | 2017 | 0.082 | 0.02 | 0.693147 | 0.48045301 | 22.94682 | 0.128037 | 22.53 |
| 26     | 2017 | -0.91 | 0.02 | 0.693147 | 0.48045301 | 21.99857 | 0.057787 | 37.15 |

|        |      |       |      |          |            |          |          |       |
|--------|------|-------|------|----------|------------|----------|----------|-------|
| 2130   | 2017 | -0.2  | 0.02 | 0.693147 | 0.48045301 | 22.55268 | 0.060011 | 27.47 |
| 300085 | 2017 | -0.01 | 0.02 | 0.693147 | 0.48045301 | 21.52009 | 0.018351 | 18.98 |
| 2243   | 2017 | 0.285 | 0.02 | 0.693147 | 0.48045301 | 21.37071 | 0.033161 | 51.52 |
| 39     | 2017 | -0.65 | 0.02 | 0.693147 | 0.48045301 | 25.59544 | 0.005707 | 58.02 |
| 2008   | 2017 | 0.59  | 0.02 | 0.693147 | 0.48045301 | 23.36965 | 0.234874 | 15.46 |
| 2008   | 2017 | 0.4   | 0.02 | 0.693147 | 0.48045301 | 23.18028 | 0.234874 | 15.46 |
| 2161   | 2017 | 0.786 | 0.02 | 0.693147 | 0.48045301 | 21.54717 | 0.001497 | 24.39 |
| 2210   | 2017 | -0.5  | 0.02 | 0.693147 | 0.48045301 | 23.53909 | 0.07385  | 48.48 |
| 2751   | 2017 | 0.248 | 0.02 | 0.693147 | 0.48045301 | 21.52582 | 0.053866 | 27.94 |
| 600525 | 2017 | 1.144 | 0.02 | 0.693147 | 0.48045301 | 23.74551 | 0.147776 | 7.84  |
| 2130   | 2017 | 0.164 | 0.02 | 0.693147 | 0.48045301 | 22.55268 | 0.060011 | 27.47 |
| 300154 | 2017 | -0.25 | 0.02 | 0.693147 | 0.48045301 | 21.34753 | 0.052606 | 39.52 |
| 2256   | 2017 | -0.17 | 0.02 | 0.693147 | 0.48045301 | 22.07361 | 0.065891 | 26.67 |
| 300317 | 2017 | -0.26 | 0.02 | 0.693147 | 0.48045301 | 22.92319 | 0.058224 | 26.39 |
| 39     | 2017 | -0.55 | 0.02 | 0.693147 | 0.48045301 | 25.59544 | 0.005707 | 58.02 |
| 2583   | 2017 | 1.238 | 0.02 | 0.693147 | 0.48045301 | 23.23397 | 0.043335 | 51.43 |
| 999    | 2017 | 0.069 | 0.02 | 0.693147 | 0.48045301 | 23.508   | 0.131014 | 63.6  |
| 21     | 2017 | -0.9  | 0.02 | 0.693147 | 0.48045301 | 23.53264 | -0.02587 | 44.51 |
| 69     | 2017 | -0.86 | 0.02 | 0.693147 | 0.48045301 | 25.74206 | 0.228299 | 53.47 |
| 2660   | 2017 | -0.37 | 0.02 | 0.693147 | 0.48045301 | 21.44009 | 0.027671 | 30.59 |
| 2106   | 2017 | -0.5  | 0.02 | 0.693147 | 0.48045301 | 22.26482 | 0.039185 | 20.84 |
| 300311 | 2017 | 1.937 | 0.02 | 0.693147 | 0.48045301 | 21.5513  | 0.11825  | 39.49 |
| 300085 | 2017 | -0.01 | 0.02 | 0.693147 | 0.48045301 | 21.29879 | 0.018351 | 18.98 |
| 2528   | 2017 | 0.875 | 0.02 | 0.693147 | 4.80E-01   | 22.04671 | 0.043314 | 30.7  |
| 39     | 2017 | -0.5  | 0.02 | 0.693147 | 4.80E-01   | 25.59544 | 0.005707 | 58.02 |
| 34     | 2017 | -0.31 | 0.02 | 0.693147 | 4.80E-01   | 23.91264 | 0.215374 | 23.66 |
| 2289   | 2017 | 0.59  | 0.02 | 0.693147 | 4.80E-01   | 20.41386 | -0.27749 | 8.42  |
| 999    | 2017 | 0.069 | 0.02 | 0.693147 | 4.80E-01   | 23.508   | 0.131014 | 63.6  |
| 39     | 2017 | -0.84 | 0.02 | 0.693147 | 4.80E-01   | 25.59544 | 0.005707 | 58.02 |
| 2055   | 2017 | -0.03 | 0.02 | 0.693147 | 4.80E-01   | 22.98371 | 0.052418 | 29.92 |
| 300136 | 2017 | -0.04 | 0.02 | 0.693147 | 4.80E-01   | 22.39722 | 0.302158 | 20.14 |
| 2313   | 2017 | -0.23 | 0.02 | 0.693147 | 4.80E-01   | 22.32659 | 0.048983 | 24.69 |
| 2191   | 2017 | -0.26 | 0.02 | 0.693147 | 0.48045301 | 22.81806 | 0.100535 | 30.97 |
| 2672   | 2017 | -0.35 | 0.02 | 0.693147 | 0.48045301 | 22.94682 | 0.128037 | 22.53 |
| 300389 | 2017 | -0.16 | 0.02 | 0.693147 | 0.48045301 | 21.3106  | 0.099564 | 25.81 |
| 2548   | 2017 | 0.482 | 0.02 | 0.693147 | 0.48045301 | 21.97989 | 0.056841 | 39.65 |
| 2340   | 2017 | 0.618 | 0.02 | 0.693147 | 0.48045301 | 23.82563 | 0.082629 | 12.44 |
| 300252 | 2017 | -0.16 | 0.02 | 0.693147 | 0.48045301 | 22.49488 | 0.062486 | 34.12 |
| 600380 | 2017 | -0.23 | 0.02 | 0.693147 | 0.48045301 | 23.82388 | 0.302158 | 47.17 |
| 2456   | 2017 | -0.15 | 0.02 | 0.693147 | 0.48045301 | 24.15202 | 0.089338 | 19.29 |
| 300047 | 2017 | 1.248 | 0.02 | 0.693147 | 0.48045301 | 22.13304 | 0.061558 | 10.15 |
| 2161   | 2017 | 0.394 | 0.02 | 0.693147 | 0.48045301 | 21.54717 | 0.001497 | 24.39 |
| 600525 | 2017 | 0.261 | 0.02 | 0.693147 | 0.48045301 | 23.74551 | 0.147776 | 7.84  |
| 1979   | 2017 | -0.33 | 0.02 | 0.693147 | 0.48045301 | 25.74206 | 0.161769 | 66.1  |
| 2243   | 2017 | 0.285 | 0.02 | 0.693147 | 0.48045301 | 21.37071 | 0.033161 | 51.52 |
| 2548   | 2017 | -0.48 | 0.02 | 0.693147 | 0.48045301 | 21.97989 | 0.056841 | 39.65 |
| 300269 | 2017 | -0.34 | 0.02 | 0.693147 | 0.48045301 | 22.75694 | 0.021003 | 18.81 |
| 300151 | 2017 | -0.53 | 0.02 | 0.693147 | 0.48045301 | 20.69812 | 0.040844 | 45.86 |
| 2789   | 2017 | 0.088 | 0.02 | 0.693147 | 0.48045301 | 22.01071 | 0.077782 | 45.23 |
| 300012 | 2017 | 0.317 | 0.02 | 0.693147 | 0.48045301 | 21.9807  | 0.054239 | 11.72 |
| 600380 | 2017 | 0.828 | 0.02 | 0.693147 | 0.48045301 | 23.82388 | 0.302158 | 47.17 |
| 300227 | 2017 | 0.085 | 0.02 | 0.693147 | 0.48045301 | 20.78301 | 0.082602 | 18.86 |
| 66     | 2017 | 0.17  | 0.02 | 0.693147 | 0.48045301 | 23.44467 | 0.05082  | 40.91 |
| 300197 | 2017 | -0.62 | 0.02 | 0.693147 | 0.48045301 | 23.73369 | 0.119324 | 41.56 |

|        |      |       |      |          |            |          |          |       |
|--------|------|-------|------|----------|------------|----------|----------|-------|
| 300112 | 2017 | -0.28 | 0.02 | 0.693147 | 0.48045301 | 20.9023  | 0.048673 | 21.76 |
| 2781   | 2017 | 0.029 | 0.02 | 0.693147 | 0.48045301 | 22.19136 | 0.076614 | 42.3  |
| 2724   | 2017 | -0.31 | 0.02 | 0.693147 | 0.48045301 | 21.44693 | 0.086153 | 70.42 |
| 300044 | 2017 | 1.072 | 0.02 | 0.693147 | 0.48045301 | 22.04703 | 0.077296 | 14.65 |
| 2130   | 2017 | 0.63  | 0.02 | 0.693147 | 0.48045301 | 22.55268 | 0.060011 | 27.47 |
| 2191   | 2017 | 0.203 | 0.02 | 0.693147 | 0.48045301 | 22.81806 | 0.100535 | 30.97 |
| 2334   | 2017 | 0.27  | 0.02 | 0.693147 | 0.48045301 | 21.89236 | 0.108504 | 17.66 |
| 300012 | 2017 | 0.909 | 0.02 | 0.693147 | 0.48045301 | 21.9807  | 0.054239 | 11.72 |
| 300389 | 2017 | -0.16 | 0.02 | 0.693147 | 0.48045301 | 21.3106  | 0.099564 | 25.81 |
| 2421   | 2017 | 0.13  | 0.02 | 0.693147 | 0.48045301 | 22.42021 | 0.102082 | 18.81 |
| 63     | 2017 | 1.204 | 0.02 | 0.693147 | 0.48045301 | 25.69282 | 0.212929 | 30.34 |
| 2369   | 2017 | 0.011 | 0.02 | 0.693147 | 0.48045301 | 21.81409 | 0.005593 | 19.54 |
| 2388   | 2017 | -0.54 | 0.02 | 0.693147 | 0.48045301 | 21.30378 | 0.053824 | 46.42 |
| 2822   | 2017 | -0.3  | 0.02 | 0.693147 | 0.48045301 | 22.14808 | 0.078734 | 33.07 |
| 12     | 2017 | -0.81 | 0.02 | 0.693147 | 0.48045301 | 23.69547 | 0.064394 | 14.84 |
| 39     | 2017 | -0.84 | 0.02 | 0.693147 | 0.48045301 | 25.59544 | 0.005707 | 58.02 |
| 600380 | 2017 | -0.23 | 0.02 | 0.693147 | 0.48045301 | 23.82388 | 0.302158 | 47.17 |
| 300319 | 2017 | -0.57 | 0.02 | 0.693147 | 0.48045301 | 21.85769 | -0.18104 | 27.06 |
| 2388   | 2017 | -0.54 | 0.02 | 0.693147 | 0.48045301 | 21.30378 | 0.053824 | 46.42 |
| 66     | 2017 | -0.17 | 0.02 | 0.693147 | 0.48045301 | 23.44467 | 0.05082  | 40.91 |
| 603118 | 2017 | 0.077 | 0.02 | 0.693147 | 0.48045301 | 22.70093 | 0.022881 | 24.98 |
| 300207 | 2017 | 0.269 | 0.02 | 0.693147 | 0.48045301 | 23.29273 | 0.183019 | 33.82 |
| 2823   | 2017 | 0.004 | 0.02 | 0.693147 | 0.48045301 | 21.39418 | 0.134302 | 32.17 |
| 300568 | 2017 | 0.911 | 0.02 | 0.693147 | 0.48045301 | 21.58767 | 0.068613 | 26.2  |
| 2340   | 2017 | 0.016 | 0.02 | 0.693147 | 0.48045301 | 23.82563 | 0.082629 | 12.44 |
| 2402   | 2017 | 0.387 | 0.02 | 0.693147 | 0.48045301 | 21.38511 | 0.136117 | 17.57 |
| 300252 | 2017 | -0.03 | 0.02 | 0.693147 | 0.48045301 | 22.49488 | 0.062486 | 34.12 |
| 2583   | 2017 | 1.889 | 0.02 | 0.693147 | 0.48045301 | 23.3573  | 0.043335 | 51.43 |
| 300151 | 2017 | -0.53 | 0.02 | 0.693147 | 0.48045301 | 20.69812 | 0.040844 | 45.86 |
| 300543 | 2017 | -0.28 | 0.02 | 0.693147 | 0.48045301 | 20.68148 | 0.122584 | 36.12 |
| 2482   | 2017 | 0.098 | 0.02 | 0.693147 | 0.48045301 | 23.48734 | 0.096247 | 39.71 |
| 2215   | 2017 | -0.48 | 0.02 | 0.693147 | 0.48045301 | 22.23673 | 0.142671 | 27.02 |
| 2456   | 2017 | -0.25 | 0.02 | 0.693147 | 0.48045301 | 24.15202 | 0.089338 | 19.29 |
| 2822   | 2017 | -0.36 | 0.02 | 0.693147 | 0.48045301 | 22.14153 | 0.078734 | 33.07 |
| 62     | 2017 | 0.56  | 0.02 | 0.693147 | 0.48045301 | 22.87101 | 0.102065 | 70.76 |
| 2161   | 2017 | 0.394 | 0.02 | 0.693147 | 0.48045301 | 21.54717 | 0.001497 | 24.39 |
| 2475   | 2017 | -0.5  | 0.02 | 0.693147 | 0.48045301 | 24.01487 | 0.125514 | 48.17 |
| 300131 | 2017 | -0.69 | 0.02 | 0.693147 | 0.48045301 | 22.35561 | 0.085853 | 26.55 |
| 2475   | 2017 | -0.06 | 0.02 | 0.693147 | 0.48045301 | 24.01487 | 0.125514 | 48.17 |
| 2210   | 2017 | -0.5  | 0.02 | 0.693147 | 0.48045301 | 23.79078 | 0.07385  | 48.48 |
| 2548   | 2017 | 0.164 | 0.02 | 0.693147 | 0.48045301 | 21.97989 | 0.056841 | 39.65 |
| 2831   | 2017 | -0.56 | 0.02 | 0.693147 | 0.48045301 | 22.91861 | 0.185639 | 52.75 |
| 2313   | 2017 | 0.161 | 0.02 | 0.693147 | 0.48045301 | 21.82833 | 0.048983 | 24.69 |
| 2047   | 2017 | -0.43 | 0.02 | 0.693147 | 0.48045301 | 22.84876 | 0.099929 | 24.48 |
| 9      | 2017 | -0.59 | 0.02 | 0.693147 | 0.48045301 | 24.02315 | -0.0567  | 11.91 |
| 39     | 2017 | -0.55 | 0.02 | 0.693147 | 0.48045301 | 25.59544 | 0.005707 | 58.02 |
| 2475   | 2017 | -0.5  | 0.02 | 0.693147 | 0.48045301 | 24.01487 | 0.125514 | 48.17 |
| 2294   | 2017 | 1.137 | 0.02 | 0.693147 | 0.48045301 | 22.64961 | 0.233316 | 65.73 |
| 2191   | 2017 | -0.59 | 0.02 | 0.693147 | 0.48045301 | 22.81806 | 0.100535 | 30.97 |
| 2475   | 2017 | -0.28 | 0.02 | 0.693147 | 0.48045301 | 24.01487 | 0.125514 | 48.17 |
| 2351   | 2017 | -0.05 | 0.02 | 0.693147 | 0.48045301 | 21.42162 | 0.064347 | 31.7  |
| 300206 | 2017 | 0.829 | 0.02 | 0.693147 | 0.48045301 | 21.07889 | 0.030303 | 20.86 |
| 2402   | 2017 | 0.072 | 0.02 | 0.693147 | 0.48045301 | 21.38511 | 0.136117 | 17.57 |
| 2055   | 2017 | -0.56 | 0.02 | 0.693147 | 0.48045301 | 22.98371 | 0.052418 | 29.92 |

|        |      |       |      |          |            |          |          |       |
|--------|------|-------|------|----------|------------|----------|----------|-------|
| 2340   | 2017 | 0.6   | 0.02 | 0.693147 | 0.48045301 | 23.82563 | 0.082629 | 12.44 |
| 300570 | 2017 | -0.47 | 0.02 | 0.693147 | 0.48045301 | 20.94392 | 0.089072 | 16.08 |
| 12     | 2017 | -0.48 | 0.02 | 0.693147 | 0.48045301 | 23.69547 | 0.094382 | 14.84 |
| 2475   | 2017 | -0.5  | 0.02 | 0.693147 | 0.48045301 | 24.01487 | 0.125514 | 48.17 |
| 2294   | 2017 | 1.137 | 0.02 | 0.693147 | 0.48045301 | 22.64961 | 0.233316 | 65.73 |
| 16     | 2017 | -0.46 | 0.02 | 0.693147 | 0.48045301 | 23.88276 | 0.302158 | 21.75 |
| 2130   | 2017 | -0.41 | 0.02 | 0.693147 | 0.48045301 | 22.55268 | 0.060011 | 27.47 |
| 600525 | 2017 | -0.18 | 0.02 | 0.693147 | 0.48045301 | 23.74551 | 0.147776 | 7.84  |
| 600380 | 2017 | -0.23 | 0.02 | 0.693147 | 0.48045301 | 23.82388 | 0.302158 | 47.17 |
| 2789   | 2017 | 0.088 | 0.02 | 0.693147 | 0.48045301 | 22.01071 | 0.077782 | 45.23 |
| 2340   | 2017 | 0.295 | 0.02 | 0.693147 | 0.48045301 | 23.82563 | 0.082629 | 12.44 |
| 300052 | 2017 | 0.869 | 0.02 | 0.693147 | 0.48045301 | 20.85417 | 0.062799 | 27.86 |
| 555    | 2017 | -0.06 | 0.02 | 0.693147 | 0.48045301 | 23.09536 | 0.064195 | 40.43 |
| 9      | 2017 | -0.58 | 0.02 | 0.693147 | 0.48045301 | 24.02315 | -0.0567  | 11.91 |
| 2340   | 2017 | 0.111 | 0.02 | 0.693147 | 0.48045301 | 23.82563 | 0.082629 | 12.44 |
| 300568 | 2017 | 0.186 | 0.02 | 0.693147 | 0.48045301 | 21.58767 | 0.068613 | 26.2  |
| 2163   | 2017 | -0.09 | 0.02 | 0.693147 | 0.48045301 | 22.63224 | -0.07214 | 13.74 |
| 2594   | 2017 | -0.47 | 0.02 | 0.693147 | 0.48045301 | 25.74206 | 0.082007 | 25.26 |
| 2351   | 2017 | -0.05 | 0.02 | 0.693147 | 0.48045301 | 21.42162 | 0.064347 | 31.7  |
| 300112 | 2017 | -0.18 | 0.02 | 0.693147 | 0.48045301 | 20.9023  | 0.048673 | 21.76 |
| 32     | 2017 | -0.77 | 0.02 | 0.693147 | 0.48045301 | 21.37941 | 0.008329 | 49.18 |
| 300568 | 2017 | 0.524 | 0.02 | 0.693147 | 0.48045301 | 21.37225 | 0.068613 | 26.2  |
| 600525 | 2017 | 0.325 | 0.02 | 0.693147 | 0.48045301 | 23.74551 | 0.147776 | 7.84  |
| 2243   | 2017 | 0.214 | 0.02 | 0.693147 | 0.48045301 | 21.37071 | 0.033161 | 51.52 |
| 300042 | 2017 | -0.36 | 0.02 | 0.693147 | 0.48045301 | 20.67376 | 0.061844 | 21.63 |
| 2105   | 2017 | -0.72 | 0.02 | 0.693147 | 0.48045301 | 21.0976  | 0.075183 | 41.93 |
| 9      | 2017 | -0.72 | 0.02 | 0.693147 | 0.48045301 | 24.02315 | -0.0567  | 11.91 |
| 2243   | 2017 | -0.4  | 0.02 | 0.693147 | 0.48045301 | 21.37071 | 0.033161 | 51.52 |
| 2654   | 2017 | -0.1  | 0.02 | 0.693147 | 0.48045301 | 22.18356 | 0.053409 | 16.73 |
| 2421   | 2017 | 0.483 | 0.02 | 0.693147 | 0.48045301 | 22.0648  | 0.102082 | 18.81 |
| 300532 | 2017 | 0.043 | 0.02 | 0.693147 | 0.48045301 | 20.9863  | 0.118284 | 46.12 |
| 2724   | 2017 | -0.25 | 0.02 | 0.693147 | 0.48045301 | 21.44693 | 0.086153 | 70.42 |
| 300012 | 2017 | -0.01 | 0.02 | 0.693147 | 0.48045301 | 21.9807  | 0.054239 | 11.72 |
| 2313   | 2017 | 1.096 | 0.02 | 0.693147 | 0.48045301 | 22.32659 | 0.048983 | 24.69 |
| 2191   | 2017 | -0.12 | 0.02 | 0.693147 | 0.48045301 | 22.81806 | 0.100535 | 30.97 |
| 60     | 2017 | -0.23 | 0.02 | 0.693147 | 0.48045301 | 23.66078 | 0.105093 | 27.51 |
| 49     | 2017 | -0.02 | 0.02 | 0.693147 | 0.48045301 | 22.75392 | 0.2004   | 45.23 |
| 300047 | 2017 | 1.248 | 0.02 | 0.693147 | 0.48045301 | 22.13304 | 0.061558 | 10.15 |
| 600525 | 2017 | 0.387 | 0.02 | 0.693147 | 0.48045301 | 23.74551 | 0.147776 | 7.84  |
| 300136 | 2017 | -0.15 | 0.02 | 0.693147 | 0.48045301 | 22.39722 | 0.302158 | 20.14 |
| 16     | 2017 | 0.501 | 0.02 | 0.693147 | 0.48045301 | 23.88276 | 0.302158 | 21.75 |
| 2340   | 2017 | -0.55 | 0.02 | 0.693147 | 0.48045301 | 23.82563 | 0.082629 | 12.44 |
| 2618   | 2017 | 1.37  | 0.02 | 0.693147 | 0.48045301 | 21.67523 | 0.014989 | 28.03 |
| 2352   | 2017 | -0.23 | 0.02 | 0.693147 | 0.48045301 | 24.77783 | 0.145172 | 61.25 |
| 300115 | 2017 | 0.435 | 0.02 | 0.693147 | 0.48045301 | 23.03417 | 0.126642 | 42.72 |
| 2215   | 2017 | 0.579 | 0.02 | 0.693147 | 0.48045301 | 22.09504 | 0.142671 | 27.02 |
| 300241 | 2017 | -0.47 | 0.02 | 0.693147 | 0.48045301 | 21.59838 | 0.108298 | 24.8  |
| 2163   | 2017 | -0.34 | 0.02 | 0.693147 | 0.48045301 | 22.63224 | -0.07214 | 13.74 |
| 300012 | 2017 | -0.08 | 0.02 | 0.693147 | 0.48045301 | 21.9807  | 0.054239 | 11.72 |
| 2139   | 2017 | 0.034 | 0.02 | 0.693147 | 0.48045301 | 21.88924 | 0.108329 | 23.24 |
| 39     | 2017 | -0.55 | 0.02 | 0.693147 | 0.48045301 | 25.59544 | 0.005707 | 58.02 |
| 600525 | 2017 | 0.482 | 0.02 | 0.693147 | 0.48045301 | 23.74551 | 0.147776 | 7.84  |
| 600525 | 2017 | 0.703 | 0.02 | 0.693147 | 0.48045301 | 23.74551 | 0.147776 | 7.84  |
| 60     | 2017 | 0.523 | 0.02 | 0.693147 | 0.48045301 | 23.66078 | 0.105093 | 27.51 |

|        |      |       |      |          |            |          |          |       |
|--------|------|-------|------|----------|------------|----------|----------|-------|
| 27     | 2017 | -0.37 | 0.02 | 0.693147 | 0.48045301 | 25.07007 | 0.02633  | 47.82 |
| 2654   | 2017 | -0.36 | 0.02 | 0.693147 | 0.48045301 | 22.18356 | 0.053409 | 16.73 |
| 2587   | 2017 | -0.26 | 0.02 | 0.693147 | 0.48045301 | 21.30742 | 0.113127 | 27.72 |
| 2475   | 2017 | -0.24 | 0.02 | 0.693147 | 0.48045301 | 24.01487 | 0.125514 | 48.17 |
| 300012 | 2017 | -0.42 | 0.02 | 0.693147 | 0.48045301 | 21.9807  | 0.054239 | 11.72 |
| 2831   | 2017 | -0    | 0.02 | 0.693147 | 0.48045301 | 22.91861 | 0.185639 | 52.75 |
| 300207 | 2017 | -0.29 | 0.02 | 0.693147 | 0.48045301 | 23.29273 | 0.183019 | 33.82 |
| 300047 | 2017 | 1.248 | 0.02 | 0.693147 | 0.48045301 | 22.032   | 0.061558 | 10.15 |
| 2837   | 2017 | -0.21 | 0.02 | 0.693147 | 0.48045301 | 20.85611 | 0.129885 | 28.23 |
| 39     | 2017 | -0.84 | 0.02 | 0.693147 | 0.48045301 | 25.59544 | 0.005707 | 58.02 |
| 2733   | 2017 | -0.65 | 0.02 | 0.693147 | 0.48045301 | 21.9825  | 0.015271 | 36.26 |
| 2816   | 2017 | -0.51 | 0.02 | 0.693147 | 0.48045301 | 20.39021 | 0.030885 | 12.43 |
| 63     | 2017 | 1.211 | 0.02 | 0.693147 | 0.48045301 | 25.69282 | 0.212929 | 30.34 |
| 300348 | 2017 | 1.339 | 0.02 | 0.693147 | 0.48045301 | 21.10676 | 0.080644 | 21.89 |
| 2047   | 2017 | -0.41 | 0.02 | 0.693147 | 0.48045301 | 22.84876 | 0.099929 | 24.48 |
| 2334   | 2017 | 0.875 | 0.02 | 0.693147 | 0.48045301 | 21.69611 | 0.108504 | 17.66 |
| 39     | 2017 | -0.55 | 0.02 | 0.693147 | 0.48045301 | 25.59544 | 0.005707 | 58.02 |
| 2416   | 2017 | 0.338 | 0.02 | 0.693147 | 0.48045301 | 23.24747 | 0.07184  | 52.5  |
| 300077 | 2017 | 1.687 | 0.02 | 0.693147 | 0.48045301 | 21.81515 | -0.19198 | 7.84  |
| 555    | 2017 | -0.06 | 0.02 | 0.693147 | 0.48045301 | 23.09536 | 0.064195 | 40.43 |
| 300052 | 2017 | 0.869 | 0.02 | 0.693147 | 0.48045301 | 20.85417 | 0.062799 | 27.86 |
| 603118 | 2017 | 0.46  | 0.02 | 0.693147 | 0.48045301 | 22.70528 | 0.022881 | 24.98 |
| 2660   | 2017 | -0.64 | 0.02 | 0.693147 | 0.48045301 | 21.44009 | 0.027671 | 30.59 |
| 39     | 2017 | -0.84 | 0.02 | 0.693147 | 0.48045301 | 25.59544 | 0.073048 | 58.02 |
| 2351   | 2017 | -0.05 | 0.02 | 0.693147 | 0.48045301 | 21.42162 | 0.064347 | 31.7  |
| 2215   | 2017 | 0.434 | 0.02 | 0.693147 | 0.48045301 | 22.23673 | 0.142671 | 27.02 |
| 300319 | 2017 | -0.68 | 0.02 | 0.693147 | 0.48045301 | 21.85769 | -0.18104 | 27.06 |
| 300115 | 2017 | 0.578 | 0.02 | 0.693147 | 0.48045301 | 22.59887 | 0.126642 | 42.72 |
| 9      | 2017 | -0.2  | 0.02 | 0.693147 | 0.48045301 | 24.02315 | 0.032501 | 11.91 |
| 2594   | 2017 | -0.47 | 0.02 | 0.693147 | 0.48045301 | 25.74206 | 0.082007 | 25.26 |
| 999    | 2017 | 0.069 | 0.02 | 0.693147 | 0.48045301 | 23.508   | 0.131014 | 63.6  |
| 19     | 2017 | 0.542 | 0.02 | 0.693147 | 0.48045301 | 20.79129 | -0.0143  | 19.09 |
| 2618   | 2017 | 1.37  | 0.02 | 0.693147 | 0.48045301 | 21.60624 | 0.014989 | 28.03 |
| 300044 | 2017 | 1.072 | 0.02 | 0.693147 | 0.48045301 | 22.04703 | 0.077296 | 14.65 |
| 26     | 2017 | -0.67 | 0.02 | 0.693147 | 0.48045301 | 21.99857 | 0.057787 | 37.15 |
| 39     | 2017 | -0.76 | 0.02 | 0.693147 | 0.48045301 | 25.59544 | 0.005707 | 58.02 |
| 300264 | 2017 | 2.389 | 0.02 | 0.693147 | 0.48045301 | 20.62967 | -0.14594 | 29.5  |
| 2369   | 2017 | -0.1  | 0.02 | 0.693147 | 0.48045301 | 22.12726 | 0.005593 | 19.54 |
| 27     | 2017 | -0.37 | 0.02 | 0.693147 | 0.48045301 | 24.46923 | 0.034182 | 47.82 |
| 2577   | 2017 | 0.356 | 0.02 | 0.693147 | 0.48045301 | 20.98663 | 0.009817 | 62.35 |
| 2191   | 2017 | -0.08 | 0.02 | 0.693147 | 0.48045301 | 22.81806 | 0.100535 | 30.97 |
| 39     | 2017 | -0.55 | 0.02 | 0.693147 | 0.48045301 | 25.59544 | 0.005707 | 58.02 |
| 600525 | 2017 | -0.01 | 0.02 | 0.693147 | 0.48045301 | 23.74551 | 0.147776 | 7.84  |
| 2121   | 2017 | 0.803 | 0.02 | 0.693147 | 0.48045301 | 23.45338 | 0.081888 | 43.14 |
| 300115 | 2017 | 0.794 | 0.02 | 0.693147 | 0.48045301 | 23.03417 | 0.126642 | 42.72 |
| 300047 | 2017 | 1.248 | 0.02 | 0.693147 | 0.48045301 | 22.032   | 0.061558 | 10.15 |
| 300037 | 2017 | 0.743 | 0.02 | 0.693147 | 0.48045301 | 22.03136 | 0.116608 | 15.09 |
| 21     | 2017 | 0.026 | 0.02 | 0.693147 | 0.48045301 | 23.53264 | -0.02587 | 44.51 |
| 2334   | 2017 | 0.518 | 0.02 | 0.693147 | 0.48045301 | 21.89236 | 0.108504 | 17.66 |
| 2577   | 2017 | -0.18 | 0.02 | 0.693147 | 0.48045301 | 21.10642 | 0.009817 | 62.35 |
| 2359   | 2017 | -0.59 | 0.02 | 0.693147 | 0.48045301 | 23.25736 | 0.035655 | 35.15 |
| 16     | 2017 | -0.82 | 0.02 | 0.693147 | 0.48045301 | 23.88276 | 0.302158 | 21.75 |
| 39     | 2017 | -0.84 | 0.02 | 0.693147 | 0.48045301 | 25.59544 | 0.005707 | 58.02 |
| 300012 | 2017 | 0.635 | 0.02 | 0.693147 | 0.48045301 | 21.9807  | 0.054239 | 11.72 |

|        |      |       |      |          |            |          |          |       |
|--------|------|-------|------|----------|------------|----------|----------|-------|
| 300570 | 2017 | -0.59 | 0.02 | 0.693147 | 0.48045301 | 20.95733 | 0.089072 | 16.08 |
| 300207 | 2017 | 0.282 | 0.02 | 0.693147 | 0.48045301 | 23.29273 | 0.183019 | 33.82 |
| 2681   | 2017 | -0.55 | 0.02 | 0.693147 | 0.48045301 | 22.89595 | 0.07212  | 37.7  |
| 2837   | 2017 | 0.289 | 0.02 | 0.693147 | 0.48045301 | 20.95261 | 0.129885 | 28.23 |
| 2831   | 2017 | -0.48 | 0.02 | 0.693147 | 0.48045301 | 22.91861 | 0.185639 | 52.75 |
| 62     | 2017 | -0.43 | 0.02 | 0.693147 | 0.48045301 | 22.35164 | 0.102065 | 70.76 |
| 300317 | 2017 | 0.534 | 0.02 | 0.693147 | 0.48045301 | 22.48436 | 0.058224 | 26.39 |
| 2815   | 2017 | 0.759 | 0.02 | 0.693147 | 0.48045301 | 22.32125 | 0.175815 | 60.63 |
| 2191   | 2017 | -0.59 | 0.02 | 0.693147 | 0.48045301 | 22.81806 | 0.100535 | 30.97 |
| 2687   | 2017 | -0.46 | 0.05 | 1.84827  | 3.4161034  | 21.09135 | 0.073883 | 13.54 |
| 300349 | 2017 | 0.165 | 0.05 | 1.84827  | 3.4161034  | 22.11673 | 0.112175 | 27.5  |
| 300032 | 2017 | -0.14 | 0.05 | 1.84827  | 3.4161034  | 22.67753 | -0.10701 | 39.57 |
| 601877 | 2017 | -0.64 | 0.05 | 1.84827  | 3.4161034  | 24.51098 | 0.14565  | 46.59 |
| 2154   | 2017 | -0.85 | 0.05 | 1.84827  | 3.4161034  | 21.98725 | 0.012041 | 9.98  |
| 600290 | 2017 | -0.43 | 0.05 | 1.84827  | 3.4161034  | 22.74148 | 0.015102 | 30.83 |
| 603568 | 2017 | -0.24 | 0.05 | 1.84827  | 3.4161034  | 22.09236 | 0.219166 | 44.42 |
| 300032 | 2017 | -0.06 | 0.05 | 1.84827  | 3.4161034  | 22.67753 | -0.10701 | 39.57 |
| 300412 | 2017 | -0.21 | 0.05 | 1.84827  | 3.4161034  | 20.91064 | 0.058668 | 35.51 |
| 603568 | 2017 | -0.9  | 0.05 | 1.84827  | 3.4161034  | 22.09236 | 0.219166 | 44.42 |
| 300032 | 2017 | -0.17 | 0.05 | 1.84827  | 3.4161034  | 22.67753 | -0.10701 | 39.57 |
| 600290 | 2017 | -0.42 | 0.05 | 1.84827  | 3.4161034  | 22.74148 | 0.015102 | 30.83 |
| 601877 | 2017 | -0.64 | 0.05 | 1.84827  | 3.4161034  | 24.51098 | 0.14565  | 46.59 |
| 300349 | 2017 | 1.122 | 0.05 | 1.84827  | 3.4161034  | 22.00366 | 0.112175 | 27.5  |
| 600290 | 2017 | -0.43 | 0.05 | 1.84827  | 3.4161034  | 22.36567 | 0.015102 | 30.83 |
| 300032 | 2017 | -0.28 | 0.05 | 1.84827  | 3.4161034  | 22.67753 | -0.10701 | 39.57 |
| 600290 | 2017 | -0.6  | 0.05 | 1.84827  | 3.4161034  | 22.74148 | 0.015102 | 30.83 |
| 600290 | 2017 | -0.16 | 0.05 | 1.84827  | 3.4161034  | 22.74148 | 0.015102 | 30.83 |
| 601877 | 2017 | -0.11 | 0.05 | 1.84827  | 3.4161034  | 24.51098 | 0.14565  | 46.59 |
| 2154   | 2017 | -0.85 | 0.05 | 1.84827  | 3.4161034  | 22.17162 | 0.012041 | 9.98  |
| 2730   | 2017 | -0.53 | 0.05 | 1.84827  | 3.4161034  | 21.17504 | 0.064466 | 51.14 |
| 601877 | 2017 | -0.27 | 0.05 | 1.84827  | 3.4161034  | 24.51098 | 0.14565  | 46.59 |
| 300032 | 2017 | -0.17 | 0.05 | 1.84827  | 3.4161034  | 22.67753 | -0.10701 | 39.57 |
| 603568 | 2017 | -0.9  | 0.05 | 1.84827  | 3.4161034  | 22.09236 | 0.219166 | 44.42 |
| 2629   | 2017 | -0.24 | 0.05 | 1.84827  | 3.4161034  | 20.46056 | -0.04785 | 19.76 |
| 300283 | 2017 | 0.599 | 0.05 | 1.84827  | 3.4161034  | 20.90458 | 0.005758 | 58.43 |
| 603116 | 2017 | -0.35 | 0.05 | 1.84827  | 3.4161034  | 22.06454 | 0.107146 | 43.05 |
| 300283 | 2017 | 0.658 | 0.05 | 1.84827  | 3.4161034  | 21.0936  | 0.005758 | 58.43 |
| 300032 | 2017 | -0.17 | 0.05 | 1.84827  | 3.4161034  | 22.67753 | -0.10701 | 39.57 |
| 300032 | 2017 | -0.17 | 0.05 | 1.84827  | 3.4161034  | 22.67753 | -0.10701 | 39.57 |
| 300349 | 2017 | -0.2  | 0.05 | 1.84827  | 3.4161034  | 22.11673 | 0.112175 | 27.5  |
| 300349 | 2017 | 0.201 | 0.05 | 1.84827  | 3.4161034  | 22.11673 | 0.112175 | 27.5  |
| 300032 | 2017 | -0.17 | 0.05 | 1.84827  | 3.4161034  | 22.67753 | -0.10701 | 39.57 |
| 2687   | 2017 | -0.82 | 0.05 | 1.84827  | 3.4161034  | 20.94813 | 0.073883 | 13.54 |
| 603116 | 2017 | -0.35 | 0.05 | 1.84827  | 3.4161034  | 22.25824 | 0.107146 | 43.05 |
| 603116 | 2017 | -0.35 | 0.05 | 1.84827  | 3.4161034  | 22.25824 | 0.107146 | 43.05 |
| 2563   | 2017 | -0.3  | 0.05 | 1.84827  | 3.4161034  | 23.33651 | 0.111735 | 17.24 |
| 603001 | 2017 | -0.83 | 0.05 | 1.84827  | 3.4161034  | 22.16672 | 0.055217 | 32.73 |
| 300032 | 2017 | -0.72 | 0.05 | 1.84827  | 3.4161034  | 22.67753 | -0.10701 | 39.57 |
| 2730   | 2017 | -0.53 | 0.05 | 1.84827  | 3.4161034  | 21.17504 | 0.064466 | 51.14 |
| 603116 | 2017 | -0.35 | 0.05 | 1.84827  | 3.4161034  | 22.25824 | 0.107146 | 43.05 |
| 300283 | 2017 | 0.658 | 0.05 | 1.84827  | 3.4161034  | 20.90458 | 0.005758 | 58.43 |
| 300032 | 2017 | -0.17 | 0.05 | 1.84827  | 3.4161034  | 22.67753 | -0.10701 | 39.57 |
| 601877 | 2017 | -0.64 | 0.05 | 1.84827  | 3.4161034  | 24.51098 | 0.14565  | 46.59 |
| 2563   | 2017 | -0.43 | 0.05 | 1.84827  | 3.4161034  | 23.33651 | 0.111735 | 17.24 |



|        |      |       |      |         |           |          |          |       |
|--------|------|-------|------|---------|-----------|----------|----------|-------|
| 601877 | 2017 | -0.38 | 0.05 | 1.84827 | 3.4161034 | 24.51098 | 0.14565  | 46.59 |
| 601877 | 2017 | -0.03 | 0.05 | 1.84827 | 3.4161034 | 24.51098 | 0.14565  | 46.59 |
| 2730   | 2017 | -0.31 | 0.05 | 1.84827 | 3.4161034 | 21.17504 | 0.064466 | 51.14 |
| 300032 | 2017 | -0.17 | 0.05 | 1.84827 | 3.4161034 | 22.67753 | -0.10701 | 39.57 |
| 2687   | 2017 | -0.59 | 0.05 | 1.84827 | 3.4161034 | 21.09135 | 0.073883 | 13.54 |
| 300032 | 2017 | -0.28 | 0.05 | 1.84827 | 3.4161034 | 22.60814 | -0.10701 | 39.57 |
| 603116 | 2017 | -0.35 | 0.05 | 1.84827 | 3.4161034 | 22.25824 | 0.107146 | 43.05 |
| 603001 | 2017 | -0.85 | 0.05 | 1.84827 | 3.4161034 | 22.39734 | 0.055217 | 32.73 |
| 300032 | 2017 | -0.72 | 0.05 | 1.84827 | 3.4161034 | 22.67753 | -0.10701 | 39.57 |
| 601877 | 2017 | 0.031 | 0.05 | 1.84827 | 3.4161034 | 24.51098 | 0.14565  | 46.59 |
| 2154   | 2017 | -0.85 | 0.05 | 1.84827 | 3.4161034 | 22.17162 | 0.012041 | 9.98  |
| 2154   | 2017 | -0.85 | 0.05 | 1.84827 | 3.4161034 | 22.17162 | 0.012041 | 9.98  |
| 300412 | 2017 | -0.48 | 0.05 | 1.84827 | 3.4161034 | 20.91064 | 0.058668 | 35.51 |
| 2687   | 2017 | -0.82 | 0.05 | 1.84827 | 3.4161034 | 21.09135 | 0.073883 | 13.54 |
| 300032 | 2017 | -0.17 | 0.05 | 1.84827 | 3.4161034 | 22.67753 | -0.10701 | 39.57 |
| 2730   | 2017 | -0.53 | 0.05 | 1.84827 | 3.4161034 | 21.17504 | 0.064466 | 51.14 |
| 2064   | 2017 | 0.626 | 0.05 | 1.84827 | 3.4161034 | 22.1543  | 0.113379 | 29.66 |
| 300349 | 2017 | -0.2  | 0.05 | 1.84827 | 3.4161034 | 22.11673 | 0.112175 | 27.5  |
| 601877 | 2017 | -0.55 | 0.05 | 1.84827 | 3.4161034 | 24.51098 | 0.14565  | 46.59 |
| 601877 | 2017 | 0.021 | 0.05 | 1.84827 | 3.4161034 | 24.51098 | 0.14565  | 46.59 |
| 601877 | 2017 | -0    | 0.05 | 1.84827 | 3.4161034 | 24.51098 | 0.14565  | 46.59 |
| 300032 | 2017 | -0.09 | 0.05 | 1.84827 | 3.4161034 | 22.67753 | -0.10701 | 39.57 |
| 300349 | 2017 | 0.201 | 0.05 | 1.84827 | 3.4161034 | 22.11673 | 0.112175 | 27.5  |
| 2064   | 2017 | 0.385 | 0.05 | 1.84827 | 3.4161034 | 22.43924 | 0.113379 | 29.66 |
| 601877 | 2017 | -0.38 | 0.05 | 1.84827 | 3.4161034 | 24.51098 | 0.14565  | 46.59 |
| 600290 | 2017 | -0.6  | 0.05 | 1.84827 | 3.4161034 | 22.74148 | 0.015102 | 30.83 |
| 300032 | 2017 | 0.004 | 0.05 | 1.84827 | 3.4161034 | 22.67753 | -0.10701 | 39.57 |
| 601877 | 2017 | 0.173 | 0.05 | 1.84827 | 3.4161034 | 24.51098 | 0.14565  | 46.59 |
| 300032 | 2017 | 0.606 | 0.05 | 1.84827 | 3.4161034 | 22.67753 | -0.10701 | 39.57 |
| 601877 | 2017 | -0.64 | 0.05 | 1.84827 | 3.4161034 | 24.51098 | 0.14565  | 46.59 |
| 601877 | 2017 | -0.45 | 0.05 | 1.84827 | 3.4161034 | 24.51098 | 0.14565  | 46.59 |
| 2154   | 2017 | -0.85 | 0.05 | 1.84827 | 3.4161034 | 22.17162 | 0.012041 | 9.98  |
| 600290 | 2017 | -0.34 | 0.05 | 1.84827 | 3.4161034 | 22.74148 | 0.015102 | 30.83 |
| 603568 | 2017 | -0.24 | 0.05 | 1.84827 | 3.4161034 | 22.09236 | 0.219166 | 44.42 |
| 300412 | 2017 | 0.185 | 0.05 | 1.84827 | 3.4161034 | 20.91064 | 0.058668 | 35.51 |
| 2629   | 2017 | -0.24 | 0.05 | 1.84827 | 3.4161034 | 20.46056 | -0.04785 | 19.76 |
| 2629   | 2017 | -0.24 | 0.05 | 1.84827 | 3.4161034 | 20.46056 | -0.04785 | 19.76 |
| 601877 | 2017 | -0.5  | 0.05 | 1.84827 | 3.4161034 | 24.51098 | 0.14565  | 46.59 |
| 601877 | 2017 | 0.494 | 0.05 | 1.84827 | 3.4161034 | 24.51098 | 0.14565  | 46.59 |
| 2629   | 2017 | -0.24 | 0.05 | 1.84827 | 3.4161034 | 20.39034 | -0.04785 | 19.76 |
| 300412 | 2017 | 0.848 | 0.05 | 1.84827 | 3.4161034 | 20.91064 | 0.058668 | 35.51 |
| 2154   | 2017 | -0.85 | 0.05 | 1.84827 | 3.4161034 | 22.17162 | 0.012041 | 9.98  |
| 601877 | 2017 | 0.683 | 0.05 | 1.84827 | 3.4161034 | 24.51098 | 0.14565  | 46.59 |
| 300412 | 2017 | -0.28 | 0.05 | 1.84827 | 3.4161034 | 20.91064 | 0.058668 | 35.51 |
| 603001 | 2017 | -0.83 | 0.05 | 1.84827 | 3.4161034 | 22.39734 | 0.055217 | 32.73 |
| 600290 | 2017 | -0.42 | 0.05 | 1.84827 | 3.4161034 | 22.74148 | 0.015102 | 30.83 |
| 2687   | 2017 | -0.46 | 0.05 | 1.84827 | 3.4161034 | 21.09135 | 0.073883 | 13.54 |
| 2154   | 2017 | -0.85 | 0.05 | 1.84827 | 3.4161034 | 22.17162 | 0.012041 | 9.98  |
| 601877 | 2017 | -0.64 | 0.05 | 1.84827 | 3.4161034 | 23.90907 | 0.14565  | 46.59 |
| 2629   | 2017 | -0.24 | 0.05 | 1.84827 | 3.4161034 | 20.46056 | -0.04785 | 19.76 |
| 2687   | 2017 | -0.72 | 0.05 | 1.84827 | 3.4161034 | 21.09135 | 0.073883 | 13.54 |
| 601877 | 2017 | -0.64 | 0.05 | 1.84827 | 3.4161034 | 24.51098 | 0.14565  | 46.59 |
| 601877 | 2017 | -0.5  | 0.05 | 1.84827 | 3.4161034 | 24.51098 | 0.14565  | 46.59 |
| 2154   | 2017 | -0.85 | 0.05 | 1.84827 | 3.4161034 | 22.17162 | 0.012041 | 9.98  |

|        |      |       |      |          |            |          |          |       |
|--------|------|-------|------|----------|------------|----------|----------|-------|
| 300032 | 2017 | -0.28 | 0.05 | 1.84827  | 3.4161034  | 22.67753 | -0.10701 | 39.57 |
| 601877 | 2017 | -0.25 | 0.05 | 1.84827  | 3.4161034  | 24.51098 | 0.14565  | 46.59 |
| 2629   | 2017 | -0.24 | 0.05 | 1.84827  | 3.4161034  | 20.46056 | -0.04785 | 19.76 |
| 300412 | 2017 | -0.28 | 0.05 | 1.84827  | 3.4161034  | 20.91064 | 0.058668 | 35.51 |
| 600290 | 2017 | -0.42 | 0.05 | 1.84827  | 3.4161034  | 22.74148 | 0.015102 | 30.83 |
| 603568 | 2017 | -0.5  | 0.05 | 1.84827  | 3.4161034  | 21.33323 | 0.219166 | 44.42 |
| 2064   | 2017 | 0.361 | 0.05 | 1.84827  | 3.4161034  | 22.43924 | 0.113379 | 29.66 |
| 2563   | 2017 | -0.29 | 0.05 | 1.84827  | 3.4161034  | 23.33651 | 0.111735 | 17.24 |
| 601877 | 2017 | -0.34 | 0.05 | 1.84827  | 3.4161034  | 24.51098 | 0.14565  | 46.59 |
| 600290 | 2017 | -0.6  | 0.05 | 1.84827  | 3.4161034  | 22.74148 | 0.015102 | 30.83 |
| 601877 | 2017 | -0.64 | 0.05 | 1.84827  | 3.4161034  | 24.51098 | 0.14565  | 46.59 |
| 2154   | 2017 | -0.85 | 0.05 | 1.84827  | 3.4161034  | 22.17162 | 0.012041 | 9.98  |
| 300032 | 2017 | -0.17 | 0.05 | 1.84827  | 3.4161034  | 22.67753 | -0.10701 | 39.57 |
| 2730   | 2017 | -0.53 | 0.05 | 1.84827  | 3.4161034  | 21.17504 | 0.064466 | 51.14 |
| 300412 | 2017 | -0.11 | 0.05 | 1.84827  | 3.4161034  | 20.91064 | 0.058668 | 35.51 |
| 2563   | 2017 | -0.43 | 0.05 | 1.84827  | 3.4161034  | 23.31602 | 0.111735 | 17.24 |
| 2064   | 2017 | 0.626 | 0.05 | 1.84827  | 3.4161034  | 22.43924 | 0.113379 | 29.66 |
| 2730   | 2017 | -0.31 | 0.05 | 1.84827  | 3.4161034  | 21.0046  | 0.064466 | 51.14 |
| 603001 | 2017 | -0.88 | 0.05 | 1.84827  | 3.4161034  | 22.39734 | 0.055217 | 32.73 |
| 2629   | 2017 | -0.24 | 0.05 | 1.84827  | 3.4161034  | 20.46056 | -0.04785 | 19.76 |
| 600290 | 2017 | -0.42 | 0.05 | 1.84827  | 3.4161034  | 22.74148 | 0.015102 | 30.83 |
| 603116 | 2017 | -0.35 | 0.05 | 1.84827  | 3.4161034  | 22.25824 | 0.107146 | 43.05 |
| 603001 | 2017 | -0.88 | 0.05 | 1.84827  | 3.4161034  | 22.39734 | 0.055217 | 32.73 |
| 2730   | 2017 | -0.48 | 0.05 | 1.84827  | 3.4161034  | 21.17504 | 0.064466 | 51.14 |
| 601877 | 2017 | -0.11 | 0.05 | 1.84827  | 3.4161034  | 24.51098 | 0.14565  | 46.59 |
| 2064   | 2017 | 0.361 | 0.05 | 1.84827  | 3.4161034  | 22.43924 | 0.113379 | 29.66 |
| 300412 | 2017 | -0.08 | 0.05 | 1.84827  | 3.4161034  | 20.91064 | 0.058668 | 35.51 |
| 300349 | 2017 | 0.217 | 0.05 | 1.84827  | 3.4161034  | 22.11673 | 0.112175 | 27.5  |
| 2563   | 2017 | -0.29 | 0.05 | 1.84827  | 3.4161034  | 23.33651 | 0.111735 | 17.24 |
| 300283 | 2017 | 0.602 | 0.05 | 1.84827  | 3.4161034  | 21.0936  | 0.005758 | 58.43 |
| 300283 | 2017 | 0.599 | 0.05 | 1.84827  | 3.4161034  | 20.90458 | 0.005758 | 58.43 |
| 601877 | 2017 | 0.683 | 0.05 | 1.84827  | 3.4161034  | 24.51098 | 0.14565  | 46.59 |
| 601877 | 2017 | 0.021 | 0.05 | 1.84827  | 3.4161034  | 24.51098 | 0.14565  | 46.59 |
| 300349 | 2017 | 0.165 | 0.05 | 1.84827  | 3.4161034  | 22.11673 | 0.112175 | 27.5  |
| 2154   | 2017 | -0.85 | 0.05 | 1.84827  | 3.4161034  | 22.17162 | 0.012041 | 9.98  |
| 2687   | 2017 | -0.16 | 0.05 | 1.84827  | 3.4161034  | 21.09135 | 0.073883 | 13.54 |
| 2629   | 2017 | -0.24 | 0.05 | 1.84827  | 3.4161034  | 20.46056 | -0.04785 | 19.76 |
| 300349 | 2017 | 0.228 | 0.05 | 1.84827  | 3.4161034  | 22.11673 | 0.112175 | 27.5  |
| 300412 | 2017 | -0.48 | 0.05 | 1.84827  | 3.4161034  | 20.6948  | 0.058668 | 35.51 |
| 300032 | 2017 | -0.72 | 0.05 | 1.84827  | 3.4161034  | 22.67753 | -0.10701 | 39.57 |
| 601877 | 2017 | 0.041 | 0.05 | 1.84827  | 3.4161034  | 24.51098 | 0.14565  | 46.59 |
| 601015 | 2017 | -0.86 | 0.04 | 0.83772  | 0.70177431 | 23.36388 | 0.044332 | 43.52 |
| 601015 | 2017 | -0.86 | 0.04 | 0.83772  | 0.70177431 | 22.74502 | 0.044332 | 43.52 |
| 601015 | 2017 | -0.86 | 0.04 | 0.83772  | 0.70177431 | 23.36388 | 0.044332 | 43.52 |
| 601015 | 2017 | -0.86 | 0.04 | 0.83772  | 0.70177431 | 23.36388 | 0.044332 | 43.52 |
| 601015 | 2017 | -0.86 | 0.04 | 0.83772  | 0.70177431 | 23.36388 | 0.044332 | 43.52 |
| 601015 | 2017 | -0.86 | 0.04 | 0.83772  | 0.70177431 | 23.36388 | 0.044332 | 43.52 |
| 2251   | 2017 | 0.347 | 0.04 | 0.248461 | 0.06173294 | 23.49707 | 0.023399 | 36.99 |
| 2125   | 2017 | -0.46 | 0.04 | 0.248461 | 0.06173294 | 21.47271 | 0.045281 | 29.51 |
| 600416 | 2017 | 1.026 | 0.04 | 0.248461 | 0.06173294 | 23.36303 | 0.011798 | 33.54 |
| 519    | 2017 | 0.27  | 0.04 | 0.248461 | 0.06173294 | 22.99834 | 0.015976 | 23.3  |
| 600416 | 2017 | 0.694 | 0.04 | 0.248461 | 0.06173294 | 23.81592 | 0.011798 | 33.54 |
| 519    | 2017 | -0.56 | 0.04 | 0.248461 | 0.06173294 | 22.99834 | 0.015976 | 23.3  |
| 2125   | 2017 | -0.46 | 0.04 | 0.248461 | 0.06173294 | 21.66205 | 0.045281 | 29.51 |

|        |      |       |      |          |            |          |          |       |
|--------|------|-------|------|----------|------------|----------|----------|-------|
| 600416 | 2017 | 0.032 | 0.04 | 0.248461 | 0.06173294 | 23.81592 | 0.011798 | 33.54 |
| 600416 | 2017 | 0.663 | 0.04 | 0.248461 | 0.06173294 | 23.81592 | 0.011798 | 33.54 |
| 519    | 2017 | -0.56 | 0.04 | 0.248461 | 0.06173294 | 22.99834 | 0.015976 | 23.3  |
| 519    | 2017 | -0.35 | 0.04 | 0.248461 | 0.06173294 | 22.99834 | 0.015976 | 23.3  |
| 600416 | 2017 | 0.668 | 0.04 | 0.248461 | 0.06173294 | 23.81592 | 0.011798 | 33.54 |
| 600416 | 2017 | 0.668 | 0.04 | 0.248461 | 0.06173294 | 23.81592 | 0.011798 | 33.54 |
| 2251   | 2017 | 0.347 | 0.04 | 0.248461 | 0.06173294 | 23.49707 | 0.023399 | 36.99 |
| 600416 | 2017 | 0.668 | 0.04 | 0.248461 | 0.06173294 | 23.81592 | 0.011798 | 33.54 |
| 519    | 2017 | 0.126 | 0.04 | 0.248461 | 0.06173294 | 22.59457 | 0.015976 | 23.3  |
| 519    | 2017 | 0.601 | 0.04 | 0.248461 | 0.06173294 | 22.99834 | 0.015976 | 23.3  |
| 519    | 2017 | 0.128 | 0.04 | 0.248461 | 0.06173294 | 22.99834 | 0.015976 | 23.3  |
| 2251   | 2017 | 0.347 | 0.04 | 0.248461 | 0.06173294 | 23.4118  | 0.023399 | 36.99 |
| 519    | 2017 | 0.455 | 0.04 | 0.248461 | 0.06173294 | 22.99834 | 0.015976 | 23.3  |
| 519    | 2017 | 0.128 | 0.04 | 0.248461 | 0.06173294 | 22.99834 | 0.015976 | 23.3  |
| 600416 | 2017 | 0.596 | 0.04 | 0.248461 | 0.06173294 | 23.81592 | 0.011798 | 33.54 |
| 519    | 2017 | -0.35 | 0.04 | 0.248461 | 0.06173294 | 22.99834 | 0.015976 | 23.3  |
| 600416 | 2017 | 0.679 | 0.04 | 0.248461 | 0.06173294 | 23.81592 | 0.011798 | 33.54 |
| 519    | 2017 | -0.56 | 0.04 | 0.248461 | 0.06173294 | 22.99834 | 0.015976 | 23.3  |
| 2125   | 2017 | -0.46 | 0.04 | 0.248461 | 0.06173294 | 21.66205 | 0.045281 | 29.51 |
| 600416 | 2017 | 0.668 | 0.04 | 0.248461 | 0.06173294 | 23.81592 | 0.011798 | 33.54 |
| 519    | 2017 | -0.56 | 0.04 | 0.248461 | 0.06173294 | 22.99834 | 0.015976 | 23.3  |
| 600416 | 2017 | 1.026 | 0.04 | 0.248461 | 0.06173294 | 23.81592 | 0.011798 | 33.54 |
| 600416 | 2017 | 0.562 | 0.04 | 0.248461 | 0.06173294 | 23.81592 | 0.011798 | 33.54 |
| 300094 | 2017 | -0.65 | 0.02 | 0.069101 | 0.00477489 | 22.09244 | 0.073956 | 32.49 |
| 300094 | 2017 | -0.64 | 0.02 | 0.069101 | 0.00477489 | 22.09244 | 0.073956 | 32.49 |
| 600433 | 2017 | -0.13 | 0.02 | 0.069101 | 0.00477489 | 22.06601 | 0.017775 | 29.1  |
| 600433 | 2017 | -0.13 | 0.02 | 0.069101 | 0.00477489 | 22.08097 | 0.017775 | 29.1  |
| 300094 | 2017 | -0.65 | 0.02 | 0.069101 | 0.00477489 | 22.09244 | 0.073956 | 32.49 |
| 300094 | 2017 | -0.62 | 0.02 | 0.069101 | 0.00477489 | 22.09244 | 0.073956 | 32.49 |
| 600433 | 2017 | -0.24 | 0.02 | 0.069101 | 0.00477489 | 22.06601 | 0.017775 | 29.1  |
| 600433 | 2017 | -0.57 | 0.02 | 0.069101 | 0.00477489 | 22.06601 | 0.017775 | 29.1  |
| 300094 | 2017 | -0.5  | 0.02 | 0.069101 | 0.00477489 | 22.09244 | 0.073956 | 32.49 |
| 600433 | 2017 | -0.57 | 0.02 | 0.069101 | 0.00477489 | 22.06601 | 0.017775 | 29.1  |
| 300094 | 2017 | -0.5  | 0.02 | 0.069101 | 0.00477489 | 21.90221 | 0.073956 | 32.49 |
| 300094 | 2017 | -0.59 | 0.02 | 0.069101 | 0.00477489 | 22.09244 | 0.073956 | 32.49 |
| 2571   | 2017 | -0.48 | 0.04 | 0.017602 | 0.00030984 | 21.35639 | 0.039505 | 42.24 |
| 300577 | 2017 | -0.63 | 0.04 | 0.017602 | 0.00030984 | 20.71293 | 0.284385 | 61.47 |
| 2597   | 2017 | -0.13 | 0.04 | 0.017602 | 0.00030984 | 22.45906 | 0.302158 | 44.25 |
| 2597   | 2017 | -0.13 | 0.04 | 0.017602 | 0.00030984 | 22.45906 | 0.302158 | 44.25 |
| 2571   | 2017 | -0.88 | 0.04 | 0.017602 | 0.00030984 | 21.39951 | 0.039505 | 42.24 |
| 600218 | 2017 | -0.64 | 0.04 | 0.017602 | 0.00030984 | 22.04227 | 0.030656 | 34.32 |
| 600218 | 2017 | -0.06 | 0.04 | 0.017602 | 0.00030984 | 22.04227 | 0.030656 | 34.32 |
| 600218 | 2017 | 0.027 | 0.04 | 0.017602 | 0.00030984 | 21.94092 | 0.030656 | 34.32 |
| 300577 | 2017 | -0.72 | 0.04 | 0.017602 | 0.00030984 | 20.71293 | 0.284385 | 61.47 |
| 2571   | 2017 | -0.92 | 0.04 | 0.017602 | 0.00030984 | 21.35639 | 0.039505 | 42.24 |
| 600218 | 2017 | -0.35 | 0.04 | 0.017602 | 0.00030984 | 22.04227 | 0.030656 | 34.32 |
| 600218 | 2017 | 0.027 | 0.04 | 0.017602 | 0.00030984 | 22.04227 | 0.030656 | 34.32 |
| 2597   | 2017 | -0.13 | 0.04 | 0.017602 | 0.00030984 | 22.45906 | 0.302158 | 44.25 |
| 2571   | 2017 | -0.92 | 0.04 | 0.017602 | 0.00030984 | 21.35639 | 0.039505 | 42.24 |
| 2571   | 2017 | -0.87 | 0.04 | 0.017602 | 0.00030984 | 21.35639 | 0.039505 | 42.24 |
| 300577 | 2017 | -0.72 | 0.04 | 0.017602 | 0.00030984 | 20.71293 | 0.284385 | 61.47 |
| 600218 | 2017 | -0.35 | 0.04 | 0.017602 | 0.00030984 | 22.04227 | 0.030656 | 34.32 |
| 300577 | 2017 | -0.8  | 0.04 | 0.017602 | 0.00030984 | 20.71293 | 0.284385 | 61.47 |
| 2597   | 2017 | -0.13 | 0.04 | 0.017602 | 0.00030984 | 22.4511  | 0.302158 | 44.25 |

|        |      |       |      |          |            |          |          |       |
|--------|------|-------|------|----------|------------|----------|----------|-------|
| 600218 | 2017 | 0.027 | 0.04 | 0.017602 | 0.00030984 | 22.04227 | 0.030656 | 34.32 |
| 600218 | 2017 | -0.26 | 0.04 | 0.017602 | 0.00030984 | 22.04227 | 0.030656 | 34.32 |
| 600218 | 2017 | 0.193 | 0.04 | 0.017602 | 0.00030984 | 22.04227 | 0.030656 | 34.32 |
| 300577 | 2017 | -0.63 | 0.04 | 0.017602 | 0.00030984 | 20.71293 | 0.284385 | 61.47 |
| 300577 | 2017 | -0.69 | 0.04 | 0.017602 | 0.00030984 | 20.48    | 0.284385 | 61.47 |
| 2571   | 2017 | -0.92 | 0.04 | 0.017602 | 0.00030984 | 21.35639 | 0.039505 | 42.24 |
| 2597   | 2017 | -0.13 | 0.04 | 0.017602 | 0.00030984 | 22.45906 | 0.302158 | 44.25 |
| 300577 | 2017 | -0.72 | 0.04 | 0.017602 | 0.00030984 | 20.71293 | 0.284385 | 61.47 |
| 639    | 2017 | -0.46 | 0.01 | 0.312375 | 0.0975781  | 21.87335 | 0.142954 | 35.98 |
| 600960 | 2017 | 0.132 | 0.01 | 0.312375 | 0.0975781  | 22.63744 | 0.049508 | 23.04 |
| 600448 | 2017 | 0.815 | 0.01 | 0.312375 | 0.0975781  | 21.9617  | 0.004736 | 14.26 |
| 601678 | 2017 | 0.349 | 0.01 | 0.312375 | 0.0975781  | 22.79193 | 0.144164 | 10.79 |
| 600960 | 2017 | 0.402 | 0.01 | 0.312375 | 0.0975781  | 22.63744 | 0.049508 | 23.04 |
| 639    | 2017 | -0.46 | 0.01 | 0.312375 | 0.0975781  | 22.76538 | 0.142954 | 35.98 |
| 601678 | 2017 | 0.578 | 0.01 | 0.312375 | 0.0975781  | 22.79193 | 0.144164 | 10.79 |
| 601678 | 2017 | 0.349 | 0.01 | 0.312375 | 0.0975781  | 22.79193 | 0.144164 | 10.79 |
| 600960 | 2017 | 0.581 | 0.01 | 0.312375 | 0.0975781  | 22.63744 | 0.049508 | 23.04 |
| 601678 | 2017 | 0.48  | 0.01 | 0.312375 | 0.0975781  | 22.7379  | 0.144164 | 10.79 |
| 600960 | 2017 | -0.66 | 0.01 | 0.312375 | 0.0975781  | 22.63744 | 0.049508 | 23.04 |
| 600448 | 2017 | 0.815 | 0.01 | 0.312375 | 0.0975781  | 21.9617  | 0.004736 | 14.26 |
| 601678 | 2017 | 0.48  | 0.01 | 0.312375 | 0.0975781  | 22.79193 | 0.144164 | 10.79 |
| 600960 | 2017 | 0.402 | 0.01 | 0.312375 | 0.0975781  | 22.63744 | 0.049508 | 23.04 |
| 600448 | 2017 | 0.815 | 0.01 | 0.312375 | 0.0975781  | 21.96822 | 0.004736 | 14.26 |
| 600960 | 2017 | -0.39 | 0.01 | 0.312375 | 0.0975781  | 22.63744 | 0.049508 | 23.04 |
| 600448 | 2017 | 0.815 | 0.01 | 0.312375 | 0.0975781  | 21.9617  | 0.004736 | 14.26 |
| 600960 | 2017 | 0.667 | 0.01 | 0.312375 | 0.0975781  | 22.41748 | 0.049508 | 23.04 |
| 601678 | 2017 | -0.11 | 0.01 | 0.312375 | 0.0975781  | 22.79193 | 0.144164 | 10.79 |
| 600960 | 2017 | 0.352 | 0.01 | 0.312375 | 0.0975781  | 22.63744 | 0.049508 | 23.04 |
| 600960 | 2017 | -0.66 | 0.01 | 0.312375 | 0.0975781  | 22.63744 | 0.049508 | 23.04 |
| 600448 | 2017 | 0.815 | 0.01 | 0.312375 | 0.0975781  | 21.9617  | 0.004736 | 14.26 |
| 601678 | 2017 | 0.349 | 0.01 | 0.312375 | 0.0975781  | 22.79193 | 0.144164 | 10.79 |
| 639    | 2017 | -0.46 | 0.01 | 0.312375 | 0.0975781  | 22.76538 | 0.142954 | 35.98 |
| 601678 | 2017 | 0.349 | 0.01 | 0.312375 | 0.0975781  | 22.79193 | 0.144164 | 10.79 |
| 601678 | 2017 | 0.441 | 0.01 | 0.312375 | 0.0975781  | 22.79193 | 0.144164 | 10.79 |
| 600069 | 2017 | -0.99 | 0.02 | 0.310026 | 0.09611632 | 22.1881  | 0.006097 | 47.35 |
| 600069 | 2017 | -0.99 | 0.02 | 0.310026 | 0.09611632 | 22.11087 | 0.006097 | 47.35 |
| 895    | 2017 | -0.95 | 0.02 | 0.310026 | 0.09611632 | 23.86263 | 0.291617 | 59.27 |
| 895    | 2017 | -0.94 | 0.02 | 0.310026 | 0.09611632 | 23.86263 | 0.291617 | 59.27 |
| 895    | 2017 | -0.94 | 0.02 | 0.310026 | 0.09611632 | 23.86263 | 0.291617 | 59.27 |
| 600069 | 2017 | -0.99 | 0.02 | 0.310026 | 0.09611632 | 22.11087 | 0.006097 | 47.35 |
| 600069 | 2017 | -0.99 | 0.02 | 0.310026 | 0.09611632 | 22.11087 | 0.006097 | 47.35 |
| 895    | 2017 | -0.94 | 0.02 | 0.310026 | 0.09611632 | 23.86263 | 0.291617 | 59.27 |
| 895    | 2017 | -0.95 | 0.02 | 0.310026 | 0.09611632 | 23.86263 | 0.291617 | 59.27 |
| 895    | 2017 | -0.94 | 0.02 | 0.310026 | 0.09611632 | 23.86263 | 0.291617 | 59.27 |
| 600069 | 2017 | -0.99 | 0.02 | 0.310026 | 0.09611632 | 22.11087 | 0.006097 | 47.35 |
| 895    | 2017 | -0.94 | 0.02 | 0.310026 | 0.09611632 | 23.86263 | 0.291617 | 59.27 |
| 600069 | 2017 | -0.99 | 0.02 | 0.310026 | 0.09611632 | 22.11087 | 0.006097 | 47.35 |
| 895    | 2017 | -0.94 | 0.02 | 0.310026 | 0.09611632 | 23.86263 | 0.291617 | 59.27 |
| 895    | 2017 | -0.94 | 0.02 | 0.310026 | 0.09611632 | 23.86263 | 0.291617 | 59.27 |
| 895    | 2017 | -0.94 | 0.02 | 0.310026 | 0.09611632 | 23.64032 | 0.291617 | 59.27 |
| 300237 | 2017 | -0.14 | 0.01 | 0.968649 | 0.93828088 | 22.81593 | 0.184276 | 26.29 |
| 300237 | 2017 | 0.858 | 0.01 | 0.968649 | 0.93828088 | 22.81593 | 0.184276 | 26.29 |
| 488    | 2017 | -0.65 | 0.01 | 0.968649 | 0.93828088 | 25.38316 | 0.124164 | 15.13 |
| 2241   | 2017 | 0.955 | 0.01 | 0.968649 | 0.93828088 | 24.00307 | 0.141227 | 23.91 |

|        |      |       |      |          |            |          |          |       |
|--------|------|-------|------|----------|------------|----------|----------|-------|
| 677    | 2017 | 0.619 | 0.01 | 0.968649 | 0.93828088 | 20.55455 | 0.011881 | 23.15 |
| 2595   | 2017 | 0.158 | 0.01 | 0.968649 | 0.93828088 | 22.25593 | 0.173027 | 29.92 |
| 2083   | 2017 | 0.48  | 0.01 | 0.968649 | 0.93828088 | 22.64643 | 0.124391 | 27.66 |
| 2241   | 2017 | -0.37 | 0.01 | 0.968649 | 0.93828088 | 24.00307 | 0.141227 | 23.91 |
| 2526   | 2017 | 0.631 | 0.01 | 0.968649 | 0.93828088 | 21.84191 | 0.034662 | 20.86 |
| 2241   | 2017 | 0.19  | 0.01 | 0.968649 | 0.93828088 | 24.00307 | 0.141227 | 23.91 |
| 880    | 2017 | -0.01 | 0.01 | 0.968649 | 0.93828088 | 21.98106 | 0.017587 | 30.59 |
| 2241   | 2017 | 0.183 | 0.01 | 0.968649 | 0.93828088 | 24.00307 | 0.141227 | 23.91 |
| 677    | 2017 | 0.619 | 0.01 | 0.968649 | 0.93828088 | 20.55455 | 0.011881 | 23.15 |
| 2595   | 2017 | 0.158 | 0.01 | 0.968649 | 0.93828088 | 22.25022 | 0.173027 | 29.92 |
| 677    | 2017 | 0.619 | 0.01 | 0.968649 | 0.93828088 | 20.10336 | 0.011881 | 23.15 |
| 2241   | 2017 | -0.22 | 0.01 | 0.968649 | 0.93828088 | 24.00307 | 0.141227 | 23.91 |
| 338    | 2017 | -0.12 | 0.01 | 0.968649 | 0.93828088 | 25.74206 | 0.162867 | 24.23 |
| 2241   | 2017 | 0.661 | 0.01 | 0.968649 | 0.93828088 | 24.00307 | 0.141227 | 23.91 |
| 488    | 2017 | -0.65 | 0.01 | 0.968649 | 0.93828088 | 24.8168  | 0.124164 | 15.13 |
| 338    | 2017 | -0.14 | 0.01 | 0.968649 | 0.93828088 | 25.74206 | 0.162867 | 24.23 |
| 2526   | 2017 | -0.69 | 0.01 | 0.968649 | 0.93828088 | 21.84191 | 0.034662 | 20.86 |
| 600076 | 2017 | 0.547 | 0.01 | 0.968649 | 0.93828088 | 22.31052 | 0.135335 | 21.31 |
| 2526   | 2017 | -0.5  | 0.01 | 0.968649 | 0.93828088 | 21.84191 | 0.034662 | 20.86 |
| 2490   | 2017 | -0.63 | 0.01 | 0.968649 | 0.93828088 | 22.43892 | 0.018164 | 32.06 |
| 300237 | 2017 | -0.1  | 0.01 | 0.968649 | 0.93828088 | 22.81593 | 0.184276 | 26.29 |
| 338    | 2017 | -0.52 | 0.01 | 0.968649 | 0.93828088 | 25.74206 | 0.162867 | 24.23 |
| 2107   | 2017 | 0.773 | 0.01 | 0.968649 | 0.93828088 | 20.56719 | 0.123209 | 50.27 |
| 300391 | 2017 | 0.131 | 0.01 | 0.968649 | 0.93828088 | 21.40077 | 0.072456 | 52.98 |
| 2241   | 2017 | 0.328 | 0.01 | 0.968649 | 0.93828088 | 24.00307 | 0.141227 | 23.91 |
| 338    | 2017 | -0.52 | 0.01 | 0.968649 | 0.93828088 | 25.74206 | 0.162867 | 24.23 |
| 488    | 2017 | -0.65 | 0.01 | 0.968649 | 0.93828088 | 25.38316 | 0.124164 | 15.13 |
| 488    | 2017 | -0.65 | 0.01 | 0.968649 | 0.93828088 | 25.38316 | 0.124164 | 15.13 |
| 677    | 2017 | 0.619 | 0.01 | 0.968649 | 0.93828088 | 20.55455 | 0.011881 | 23.15 |
| 338    | 2017 | -0.52 | 0.01 | 0.968649 | 0.93828088 | 25.74206 | 0.162867 | 24.23 |
| 300391 | 2017 | 0.205 | 0.01 | 0.968649 | 0.93828088 | 21.24255 | 0.072456 | 52.98 |
| 2107   | 2017 | 0.773 | 0.01 | 0.968649 | 0.93828088 | 20.39116 | 0.123209 | 50.27 |
| 300237 | 2017 | -0.02 | 0.01 | 0.968649 | 0.93828088 | 22.81593 | 0.184276 | 26.29 |
| 2526   | 2017 | 0.631 | 0.01 | 0.968649 | 0.93828088 | 21.84191 | 0.034662 | 20.86 |
| 338    | 2017 | -0.67 | 0.01 | 0.968649 | 0.93828088 | 25.74206 | 0.162867 | 24.23 |
| 300391 | 2017 | 0.131 | 0.01 | 0.968649 | 0.93828088 | 21.40077 | 0.072456 | 52.98 |
| 2655   | 2017 | 0.088 | 0.01 | 0.968649 | 0.93828088 | 20.81862 | -0.3743  | 15.27 |
| 2083   | 2017 | 0.48  | 0.01 | 0.968649 | 0.93828088 | 22.72601 | 0.124391 | 27.66 |
| 338    | 2017 | 0.046 | 0.01 | 0.968649 | 0.93828088 | 25.74206 | 0.162867 | 24.23 |
| 600076 | 2017 | 0.547 | 0.01 | 0.968649 | 0.93828088 | 22.44559 | 0.135335 | 21.31 |
| 300391 | 2017 | -0.46 | 0.01 | 0.968649 | 0.93828088 | 21.40077 | 0.072456 | 52.98 |
| 2241   | 2017 | -0.21 | 0.01 | 0.968649 | 0.93828088 | 24.00307 | 0.141227 | 23.91 |
| 300391 | 2017 | 0.154 | 0.01 | 0.968649 | 0.93828088 | 21.40077 | 0.072456 | 52.98 |
| 300391 | 2017 | 0.094 | 0.01 | 0.968649 | 0.93828088 | 21.40077 | 0.072456 | 52.98 |
| 2526   | 2017 | 0.631 | 0.01 | 0.968649 | 0.93828088 | 21.68281 | 0.034662 | 20.86 |
| 300237 | 2017 | 0.102 | 0.01 | 0.968649 | 0.93828088 | 22.81593 | 0.184276 | 26.29 |
| 2241   | 2017 | 0.14  | 0.01 | 0.968649 | 0.93828088 | 24.00307 | 0.141227 | 23.91 |
| 2526   | 2017 | -0.36 | 0.01 | 0.968649 | 0.93828088 | 21.84191 | 0.034662 | 20.86 |
| 338    | 2017 | 0.102 | 0.01 | 0.968649 | 0.93828088 | 25.74206 | 0.162867 | 24.23 |
| 2241   | 2017 | 0.183 | 0.01 | 0.968649 | 0.93828088 | 24.00307 | 0.141227 | 23.91 |
| 2526   | 2017 | -0.69 | 0.01 | 0.968649 | 0.93828088 | 21.84191 | 0.034662 | 20.86 |
| 338    | 2017 | -0.41 | 0.01 | 0.968649 | 0.93828088 | 24.82717 | 0.162867 | 24.23 |
| 488    | 2017 | -0.65 | 0.01 | 0.968649 | 0.93828088 | 25.38316 | 0.124164 | 15.13 |
| 2107   | 2017 | 0.773 | 0.01 | 0.968649 | 0.93828088 | 20.56719 | 0.123209 | 50.27 |

|        |      |       |      |          |            |          |          |       |
|--------|------|-------|------|----------|------------|----------|----------|-------|
| 677    | 2017 | 0.619 | 0.01 | 0.968649 | 0.93828088 | 20.55455 | 0.011881 | 23.15 |
| 338    | 2017 | -0.52 | 0.01 | 0.968649 | 0.93828088 | 25.74206 | 0.162867 | 24.23 |
| 300237 | 2017 | 0.031 | 0.01 | 0.968649 | 0.93828088 | 22.81593 | 0.184276 | 26.29 |
| 300391 | 2017 | -0.46 | 0.01 | 0.968649 | 0.93828088 | 21.40077 | 0.072456 | 52.98 |
| 2655   | 2017 | 0.088 | 0.01 | 0.968649 | 0.93828088 | 20.82546 | -0.3743  | 15.27 |
| 338    | 2017 | -0.01 | 0.01 | 0.968649 | 0.93828088 | 25.74206 | 0.162867 | 24.23 |
| 880    | 2017 | -0.01 | 0.01 | 0.968649 | 0.93828088 | 22.00873 | 0.017587 | 30.59 |
| 338    | 2017 | -0.52 | 0.01 | 0.968649 | 0.93828088 | 25.74206 | 0.162867 | 24.23 |
| 600076 | 2017 | 0.547 | 0.01 | 0.968649 | 0.93828088 | 22.31052 | 0.135335 | 21.31 |
| 2526   | 2017 | 0.631 | 0.01 | 0.968649 | 0.93828088 | 21.84191 | 0.034662 | 20.86 |
| 2241   | 2017 | 0.043 | 0.01 | 0.968649 | 0.93828088 | 24.00307 | 0.141227 | 23.91 |
| 338    | 2017 | -0.15 | 0.01 | 0.968649 | 0.93828088 | 25.74206 | 0.162867 | 24.23 |
| 2490   | 2017 | -0.63 | 0.01 | 0.968649 | 0.93828088 | 22.55149 | 0.018164 | 32.06 |
| 2655   | 2017 | 0.088 | 0.01 | 0.968649 | 0.93828088 | 20.81862 | -0.3743  | 15.27 |
| 338    | 2017 | -0.52 | 0.01 | 0.968649 | 0.93828088 | 25.74206 | 0.162867 | 24.23 |
| 2107   | 2017 | 0.773 | 0.01 | 0.968649 | 0.93828088 | 20.56719 | 0.123209 | 50.27 |
| 600076 | 2017 | 0.547 | 0.01 | 0.968649 | 0.93828088 | 22.31052 | 0.135335 | 21.31 |
| 2241   | 2017 | 0.328 | 0.01 | 0.968649 | 0.93828088 | 24.00307 | 0.141227 | 23.91 |
| 488    | 2017 | -0.65 | 0.01 | 0.968649 | 0.93828088 | 25.38316 | 0.124164 | 15.13 |
| 488    | 2017 | -0.65 | 0.01 | 0.968649 | 0.93828088 | 25.38316 | 0.124164 | 15.13 |
| 2595   | 2017 | 0.158 | 0.01 | 0.968649 | 0.93828088 | 22.25022 | 0.173027 | 29.92 |
| 2526   | 2017 | 0.631 | 0.01 | 0.968649 | 0.93828088 | 21.84191 | 0.034662 | 20.86 |
| 488    | 2017 | -0.65 | 0.01 | 0.968649 | 0.93828088 | 25.38316 | 0.124164 | 15.13 |
| 2107   | 2017 | 0.773 | 0.01 | 0.968649 | 0.93828088 | 20.56719 | 0.123209 | 50.27 |
| 2241   | 2017 | 0.661 | 0.01 | 0.968649 | 0.93828088 | 24.00307 | 0.141227 | 23.91 |
| 338    | 2017 | -0.52 | 0.01 | 0.968649 | 0.93828088 | 25.74206 | 0.162867 | 24.23 |
| 338    | 2017 | -0.63 | 0.01 | 0.968649 | 0.93828088 | 25.74206 | 0.162867 | 24.23 |
| 2526   | 2017 | -0.36 | 0.01 | 0.968649 | 0.93828088 | 21.84191 | 0.034662 | 20.86 |
| 300237 | 2017 | 0.036 | 0.01 | 0.968649 | 0.93828088 | 22.81593 | 0.184276 | 26.29 |
| 2107   | 2017 | 0.773 | 0.01 | 0.968649 | 0.93828088 | 20.56719 | 0.123209 | 50.27 |
| 2526   | 2017 | -0.69 | 0.01 | 0.968649 | 0.93828088 | 21.84191 | 0.034662 | 20.86 |
| 2490   | 2017 | -0.63 | 0.01 | 0.968649 | 0.93828088 | 22.55149 | 0.018164 | 32.06 |
| 338    | 2017 | -0.52 | 0.01 | 0.968649 | 0.93828088 | 25.74206 | 0.162867 | 24.23 |
| 2526   | 2017 | 0.631 | 0.01 | 0.968649 | 0.93828088 | 21.84191 | 0.034662 | 20.86 |
| 488    | 2017 | -0.65 | 0.01 | 0.968649 | 0.93828088 | 25.38316 | 0.124164 | 15.13 |
| 338    | 2017 | -0.27 | 0.01 | 0.968649 | 0.93828088 | 25.74206 | 0.162867 | 24.23 |
| 300237 | 2017 | 0.527 | 0.01 | 0.968649 | 0.93828088 | 22.81593 | 0.184276 | 26.29 |
| 338    | 2017 | 0.046 | 0.01 | 0.968649 | 0.93828088 | 25.74206 | 0.162867 | 24.23 |
| 338    | 2017 | -0.52 | 0.01 | 0.968649 | 0.93828088 | 25.74206 | 0.162867 | 24.23 |
| 880    | 2017 | -0.01 | 0.01 | 0.968649 | 0.93828088 | 22.00873 | 0.017587 | 30.59 |
| 338    | 2017 | -0.52 | 0.01 | 0.968649 | 0.93828088 | 25.74206 | 0.162867 | 24.23 |
| 880    | 2017 | -0.01 | 0.01 | 0.968649 | 0.93828088 | 22.00873 | 0.017587 | 30.59 |
| 2083   | 2017 | 0.48  | 0.01 | 0.968649 | 0.93828088 | 22.72601 | 0.124391 | 27.66 |
| 300237 | 2017 | 0.858 | 0.01 | 0.968649 | 0.93828088 | 21.89698 | 0.184276 | 26.29 |
| 300237 | 2017 | -0.47 | 0.01 | 0.968649 | 0.93828088 | 22.81593 | 0.184276 | 26.29 |
| 488    | 2017 | -0.65 | 0.01 | 0.968649 | 0.93828088 | 25.38316 | 0.124164 | 15.13 |
| 2241   | 2017 | 0.183 | 0.01 | 0.968649 | 0.93828088 | 23.91972 | 0.141227 | 23.91 |
| 2241   | 2017 | -0.37 | 0.01 | 0.968649 | 0.93828088 | 24.00307 | 0.141227 | 23.91 |
| 338    | 2017 | -0.52 | 0.01 | 0.968649 | 0.93828088 | 25.74206 | 0.162867 | 24.23 |
| 600568 | 2017 | 0.36  | 0.03 | 1.268921 | 1.6101602  | 22.7073  | 0.02608  | 29.52 |
| 600568 | 2017 | 0.33  | 0.03 | 1.268921 | 1.6101602  | 22.56587 | 0.02608  | 29.52 |
| 600568 | 2017 | 0.33  | 0.03 | 1.268921 | 1.6101602  | 22.7073  | 0.02608  | 29.52 |
| 600568 | 2017 | 0.691 | 0.03 | 1.268921 | 1.6101602  | 22.7073  | 0.02608  | 29.52 |
| 600568 | 2017 | 0.33  | 0.03 | 1.268921 | 1.6101602  | 22.7073  | 0.02608  | 29.52 |

|        |      |       |      |          |            |          |          |       |
|--------|------|-------|------|----------|------------|----------|----------|-------|
| 600568 | 2017 | 0.33  | 0.03 | 1.268921 | 1.6101602  | 22.7073  | 0.02608  | 29.52 |
| 600568 | 2017 | 0.346 | 0.03 | 1.268921 | 1.6101602  | 22.7073  | 0.02608  | 29.52 |
| 603268 | 2017 | -0.63 | 0.02 | 1.00186  | 1.0037231  | 20.92583 | 0.08381  | 29.04 |
| 300408 | 2017 | 0.156 | 0.02 | 1.00186  | 1.0037231  | 22.72938 | 0.182939 | 37.07 |
| 603268 | 2017 | -0.63 | 0.02 | 1.00186  | 1.0037231  | 20.92583 | 0.08381  | 29.04 |
| 2836   | 2017 | 0.109 | 0.02 | 1.00186  | 1.0037231  | 20.10336 | 0.111435 | 64.77 |
| 300089 | 2017 | -0.52 | 0.02 | 1.00186  | 1.0037231  | 21.72399 | 0.040282 | 32.99 |
| 603838 | 2017 | 0.711 | 0.02 | 1.00186  | 1.0037231  | 20.46211 | 0.060411 | 9.65  |
| 300408 | 2017 | 0.152 | 0.02 | 1.00186  | 1.0037231  | 22.72938 | 0.182939 | 37.07 |
| 603268 | 2017 | 0.601 | 0.02 | 1.00186  | 1.0037231  | 20.92583 | 0.08381  | 29.04 |
| 300089 | 2017 | -0.31 | 0.02 | 1.00186  | 1.0037231  | 21.72399 | 0.040282 | 32.99 |
| 603838 | 2017 | 0.711 | 0.02 | 1.00186  | 1.0037231  | 20.48698 | 0.060411 | 9.65  |
| 300408 | 2017 | 0.156 | 0.02 | 1.00186  | 1.00E+00   | 22.62869 | 0.182939 | 37.07 |
| 300089 | 2017 | -0.52 | 0.02 | 1.00186  | 1.00E+00   | 21.72399 | 0.040282 | 32.99 |
| 300089 | 2017 | -0.27 | 0.02 | 1.00186  | 1.00E+00   | 21.68629 | 0.040282 | 32.99 |
| 300408 | 2017 | 0.119 | 0.02 | 1.00186  | 1.00E+00   | 22.72938 | 0.182939 | 37.07 |
| 603268 | 2017 | -0.6  | 0.02 | 1.00186  | 1.00E+00   | 20.80835 | 0.08381  | 29.04 |
| 300089 | 2017 | 0.14  | 0.02 | 1.00186  | 1.0037231  | 21.72399 | 0.040282 | 32.99 |
| 300408 | 2017 | 0.119 | 0.02 | 1.00186  | 1.0037231  | 22.72938 | 0.182939 | 37.07 |
| 2836   | 2017 | 0.109 | 0.02 | 1.00186  | 1.0037231  | 20.10336 | 0.111435 | 64.77 |
| 603838 | 2017 | 0.711 | 0.02 | 1.00186  | 1.0037231  | 20.48698 | 0.060411 | 9.65  |
| 603838 | 2017 | 0.711 | 0.02 | 1.00186  | 1.0037231  | 20.48698 | 0.060411 | 9.65  |
| 603838 | 2017 | 0.711 | 0.02 | 1.00186  | 1.0037231  | 20.48698 | 0.060411 | 9.65  |
| 2836   | 2017 | -0.29 | 0.02 | 1.00186  | 1.0037231  | 20.10336 | 0.111435 | 64.77 |
| 2836   | 2017 | -0.29 | 0.02 | 1.00186  | 1.0037231  | 20.10336 | 0.111435 | 64.77 |
| 603268 | 2017 | -0.58 | 0.02 | 1.00186  | 1.0037231  | 20.92583 | 0.08381  | 29.04 |
| 2836   | 2017 | -0.04 | 0.02 | 1.00186  | 1.0037231  | 20.10336 | 0.111435 | 64.77 |
| 300089 | 2017 | -0.38 | 0.02 | 1.00186  | 1.0037231  | 21.72399 | 0.040282 | 32.99 |
| 603268 | 2017 | -0.72 | 0.02 | 1.00186  | 1.0037231  | 20.92583 | 0.08381  | 29.04 |
| 300089 | 2017 | 0.14  | 0.02 | 1.00186  | 1.0037231  | 21.72399 | 0.040282 | 32.99 |
| 300089 | 2017 | 0.802 | 0.02 | 1.00186  | 1.0037231  | 21.72399 | 0.040282 | 32.99 |
| 2225   | 2017 | -0.19 | 0.02 | 0.005528 | 0.00003056 | 22.28884 | 0.012651 | 16.12 |
| 2225   | 2017 | -0.53 | 0.02 | 0.005528 | 0.00003056 | 22.28884 | 0.012651 | 16.12 |
| 300481 | 2017 | 1.198 | 0.02 | 0.005528 | 0.00003056 | 20.26559 | 0.14273  | 49.08 |
| 2225   | 2017 | 0.357 | 0.02 | 0.005528 | 0.00003056 | 22.28884 | 0.012651 | 16.12 |
| 300481 | 2017 | 1.009 | 0.02 | 0.005528 | 0.00003056 | 20.26041 | 0.14273  | 49.08 |
| 2225   | 2017 | -0.09 | 0.02 | 0.005528 | 0.00003056 | 22.28884 | 0.012651 | 16.12 |
| 2225   | 2017 | 0.357 | 0.02 | 0.005528 | 0.00003056 | 22.28884 | 0.012651 | 16.12 |
| 300481 | 2017 | 1.198 | 0.02 | 0.005528 | 0.00003056 | 20.26559 | 0.14273  | 49.08 |
| 300481 | 2017 | 0.977 | 0.02 | 0.005528 | 0.00003056 | 20.26559 | 0.14273  | 49.08 |
| 2225   | 2017 | -0.53 | 0.02 | 0.005528 | 0.00003056 | 22.28884 | 0.012651 | 16.12 |
| 2225   | 2017 | -0.13 | 0.02 | 0.005528 | 0.00003056 | 22.28884 | 0.012651 | 16.12 |
| 2225   | 2017 | 0.357 | 0.02 | 0.005528 | 0.00003056 | 22.28884 | 0.012651 | 16.12 |
| 300481 | 2017 | 0.977 | 0.02 | 0.005528 | 0.00003056 | 20.26559 | 0.14273  | 49.08 |
| 2225   | 2017 | -0.53 | 0.02 | 0.005528 | 0.00003056 | 22.28884 | 0.012651 | 16.12 |
| 2225   | 2017 | 0.798 | 0.02 | 0.005528 | 0.00003056 | 22.28884 | 0.012651 | 16.12 |
| 2225   | 2017 | -0.53 | 0.02 | 0.005528 | 0.00003056 | 22.157   | 0.012651 | 16.12 |
| 2225   | 2017 | -0.53 | 0.02 | 0.005528 | 0.00003056 | 22.28884 | 0.012651 | 16.12 |
| 2675   | 2017 | 0.684 | 0.01 | 1.95559  | 3.8243317  | 22.38589 | 0.080495 | 19.62 |
| 600309 | 2017 | -0.66 | 0.01 | 1.95559  | 3.8243317  | 24.91031 | 0.302158 | 47.92 |
| 603779 | 2017 | -0.58 | 0.01 | 1.95559  | 3.8243317  | 21.35672 | 0.045674 | 47.23 |
| 2374   | 2017 | -0.21 | 0.01 | 1.95559  | 3.8243317  | 22.57515 | 0.028816 | 13.34 |
| 2041   | 2017 | 0.557 | 0.01 | 1.95559  | 3.8243317  | 22.21527 | 0.036289 | 53.19 |
| 2643   | 2017 | 0.91  | 0.01 | 1.95559  | 3.8243317  | 22.23884 | 0.094665 | 20.54 |

|        |      |       |      |         |           |          |          |       |
|--------|------|-------|------|---------|-----------|----------|----------|-------|
| 2355   | 2017 | -0.58 | 0.01 | 1.95559 | 3.8243317 | 22.17795 | 0.044716 | 33.84 |
| 2353   | 2017 | 0.439 | 0.01 | 1.95559 | 3.8243317 | 23.05513 | 0.009268 | 22.4  |
| 2353   | 2017 | 0.426 | 0.01 | 1.95559 | 3.8243317 | 23.05513 | 0.009268 | 22.4  |
| 811    | 2017 | 0.133 | 0.01 | 1.95559 | 3.8243317 | 22.43867 | 0.116121 | 29.15 |
| 811    | 2017 | -0.51 | 0.01 | 1.95559 | 3.8243317 | 21.9814  | 0.116121 | 29.15 |
| 811    | 2017 | -0.41 | 0.01 | 1.95559 | 3.8243317 | 22.43867 | 0.116121 | 29.15 |
| 2041   | 2017 | 0.493 | 0.01 | 1.95559 | 3.8243317 | 22.21527 | 0.036289 | 53.19 |
| 300308 | 2017 | 0.012 | 0.01 | 1.95559 | 3.8243317 | 22.77867 | 0.040317 | 20.97 |
| 300224 | 2017 | 1.081 | 0.01 | 1.95559 | 3.8243317 | 22.07044 | 0.031615 | 50.17 |
| 600309 | 2017 | 0.666 | 0.01 | 1.95559 | 3.8243317 | 24.91031 | 0.302158 | 47.92 |
| 300308 | 2017 | 0.012 | 0.01 | 1.95559 | 3.8243317 | 22.77867 | 0.040317 | 20.97 |
| 600309 | 2017 | 0.666 | 0.01 | 1.95559 | 3.8243317 | 24.91031 | 0.302158 | 47.92 |
| 2374   | 2017 | -0.19 | 0.01 | 1.95559 | 3.8243317 | 22.57515 | 0.028816 | 13.34 |
| 300423 | 2017 | -0.45 | 0.01 | 1.95559 | 3.8243317 | 20.40326 | 0.056975 | 44.26 |
| 2643   | 2017 | 0.91  | 0.01 | 1.95559 | 3.8243317 | 22.23884 | 0.094665 | 20.54 |
| 682    | 2017 | 0.575 | 0.01 | 1.95559 | 3.8243317 | 22.28998 | 0.059065 | 19.74 |
| 2254   | 2017 | 0.137 | 0.01 | 1.95559 | 3.8243317 | 21.68606 | 0.048763 | 35.5  |
| 601966 | 2017 | -0.19 | 0.01 | 1.95559 | 3.8243317 | 23.41598 | 0.120335 | 50.35 |
| 2353   | 2017 | 0.439 | 0.01 | 1.95559 | 3.8243317 | 23.05513 | 0.009268 | 22.4  |
| 600309 | 2017 | 0.666 | 0.01 | 1.95559 | 3.8243317 | 24.91031 | 0.302158 | 47.92 |
| 600309 | 2017 | 0.666 | 0.01 | 1.95559 | 3.8243317 | 24.37026 | 0.302158 | 47.92 |
| 2374   | 2017 | -0.11 | 0.01 | 1.95559 | 3.8243317 | 22.57515 | 0.028816 | 13.34 |
| 2237   | 2017 | 0.406 | 0.01 | 1.95559 | 3.8243317 | 23.28284 | 0.084625 | 35.87 |
| 2254   | 2017 | 0.137 | 0.01 | 1.95559 | 3.8243317 | 21.62174 | 0.048763 | 35.5  |
| 811    | 2017 | 0.819 | 0.01 | 1.95559 | 3.8243317 | 22.43867 | 0.116121 | 29.15 |
| 2237   | 2017 | 0.229 | 0.01 | 1.95559 | 3.8243317 | 23.28284 | 0.084625 | 35.87 |
| 2374   | 2017 | -0.11 | 0.01 | 1.95559 | 3.8243317 | 22.57515 | 0.028816 | 13.34 |
| 682    | 2017 | 1.142 | 0.01 | 1.95559 | 3.8243317 | 22.28998 | 0.059065 | 19.74 |
| 2353   | 2017 | 0.439 | 0.01 | 1.95559 | 3.8243317 | 22.78189 | 0.009268 | 22.4  |
| 811    | 2017 | 0.819 | 0.01 | 1.95559 | 3.8243317 | 22.43867 | 0.116121 | 29.15 |
| 2041   | 2017 | 0.493 | 0.01 | 1.95559 | 3.8243317 | 22.21527 | 0.036289 | 53.19 |
| 600309 | 2017 | 0.658 | 0.01 | 1.95559 | 3.8243317 | 24.91031 | 0.302158 | 47.92 |
| 2353   | 2017 | 0.439 | 0.01 | 1.95559 | 3.8243317 | 23.05513 | 0.009268 | 22.4  |
| 2353   | 2017 | 0.439 | 0.01 | 1.95559 | 3.8243317 | 23.05513 | 0.009268 | 22.4  |
| 2353   | 2017 | 0.334 | 0.01 | 1.95559 | 3.8243317 | 23.05513 | 0.009268 | 22.4  |
| 300105 | 2017 | 0.51  | 0.01 | 1.95559 | 3.8243317 | 21.59653 | 0.007079 | 23.25 |
| 2374   | 2017 | -0.21 | 0.01 | 1.95559 | 3.8243317 | 22.57515 | 0.028816 | 13.34 |
| 300105 | 2017 | 0.51  | 0.01 | 1.95559 | 3.8243317 | 21.59433 | 0.007079 | 23.25 |
| 2726   | 2017 | 0.333 | 0.01 | 1.95559 | 3.8243317 | 21.47748 | 0.09768  | 45.96 |
| 300308 | 2017 | 0.718 | 0.01 | 1.95559 | 3.8243317 | 22.77867 | 0.040317 | 20.97 |
| 2254   | 2017 | -0.6  | 0.01 | 1.95559 | 3.8243317 | 21.68606 | 0.048763 | 35.5  |
| 2643   | 2017 | 0.91  | 0.01 | 1.95559 | 3.8243317 | 22.23884 | 0.094665 | 20.54 |
| 601966 | 2017 | 0.712 | 0.01 | 1.95559 | 3.8243317 | 23.68782 | 0.120335 | 50.35 |
| 2675   | 2017 | -0.48 | 0.01 | 1.95559 | 3.8243317 | 22.38589 | 0.080495 | 19.62 |
| 300105 | 2017 | 0.51  | 0.01 | 1.95559 | 3.8243317 | 21.59433 | 0.007079 | 23.25 |
| 2353   | 2017 | 0.439 | 0.01 | 1.95559 | 3.8243317 | 23.05513 | 0.009268 | 22.4  |
| 300224 | 2017 | 0.124 | 0.01 | 1.95559 | 3.8243317 | 21.94099 | 0.031615 | 50.17 |
| 2355   | 2017 | 0.572 | 0.01 | 1.95559 | 3.8243317 | 22.17795 | 0.044716 | 33.84 |
| 811    | 2017 | -0.06 | 0.01 | 1.95559 | 3.8243317 | 22.43867 | 0.116121 | 29.15 |
| 2237   | 2017 | 0.671 | 0.01 | 1.95559 | 3.8243317 | 23.28284 | 0.084625 | 35.87 |
| 811    | 2017 | -0.37 | 0.01 | 1.95559 | 3.8243317 | 22.43867 | 0.116121 | 29.15 |
| 2726   | 2017 | 0.333 | 0.01 | 1.95559 | 3.8243317 | 21.65688 | 0.09768  | 45.96 |
| 300105 | 2017 | 0.51  | 0.01 | 1.95559 | 3.8243317 | 21.59433 | 0.007079 | 23.25 |
| 300308 | 2017 | 0.012 | 0.01 | 1.95559 | 3.8243317 | 22.77867 | 0.040317 | 20.97 |



|        |      |       |      |         |           |          |          |       |
|--------|------|-------|------|---------|-----------|----------|----------|-------|
| 2363   | 2017 | -0.51 | 0.01 | 1.95559 | 3.8243317 | 21.9161  | 0.023136 | 42.24 |
| 682    | 2017 | -0.18 | 0.01 | 1.95559 | 3.8243317 | 22.28998 | 0.059065 | 19.74 |
| 682    | 2017 | -0.18 | 0.01 | 1.95559 | 3.8243317 | 22.28998 | 0.059065 | 19.74 |
| 811    | 2017 | 0.133 | 0.01 | 1.95559 | 3.8243317 | 22.43867 | 0.116121 | 29.15 |
| 601966 | 2017 | 0.712 | 0.01 | 1.95559 | 3.8243317 | 23.68782 | 0.120335 | 50.35 |
| 2254   | 2017 | -0.6  | 0.01 | 1.95559 | 3.8243317 | 21.68606 | 0.048763 | 35.5  |
| 2355   | 2017 | 0.572 | 0.01 | 1.95559 | 3.8243317 | 22.17795 | 0.044716 | 33.84 |
| 2254   | 2017 | 0.137 | 0.01 | 1.95559 | 3.8243317 | 21.68606 | 0.048763 | 35.5  |
| 2254   | 2017 | 0.137 | 0.01 | 1.95559 | 3.8243317 | 21.68606 | 0.048763 | 35.5  |
| 2355   | 2017 | 0.121 | 0.01 | 1.95559 | 3.8243317 | 22.17795 | 0.044716 | 33.84 |
| 601966 | 2017 | -0.26 | 0.01 | 1.95559 | 3.8243317 | 23.68782 | 0.120335 | 50.35 |
| 300224 | 2017 | -0.24 | 0.01 | 1.95559 | 3.8243317 | 22.07044 | 0.031615 | 50.17 |
| 682    | 2017 | 1.142 | 0.01 | 1.95559 | 3.8243317 | 21.47771 | 0.059065 | 19.74 |
| 2355   | 2017 | -0.58 | 0.01 | 1.95559 | 3.8243317 | 22.17795 | 0.044716 | 33.84 |
| 2353   | 2017 | 0.397 | 0.01 | 1.95559 | 3.8243317 | 23.05513 | 0.009268 | 22.4  |
| 300105 | 2017 | 0.51  | 0.01 | 1.95559 | 3.8243317 | 21.59433 | 0.007079 | 23.25 |
| 2675   | 2017 | 0.684 | 0.01 | 1.95559 | 3.8243317 | 22.38589 | 0.080495 | 19.62 |
| 682    | 2017 | 0.459 | 0.01 | 1.95559 | 3.8243317 | 22.28998 | 0.059065 | 19.74 |
| 2374   | 2017 | -0.11 | 0.01 | 1.95559 | 3.8243317 | 22.11156 | 0.028816 | 13.34 |
| 300224 | 2017 | 0.124 | 0.01 | 1.95559 | 3.8243317 | 22.07044 | 0.031615 | 50.17 |
| 2254   | 2017 | 0.137 | 0.01 | 1.95559 | 3.8243317 | 21.68606 | 0.048763 | 35.5  |
| 2254   | 2017 | 0.137 | 0.01 | 1.95559 | 3.8243317 | 21.68606 | 0.048763 | 35.5  |
| 2353   | 2017 | 0.145 | 0.01 | 1.95559 | 3.8243317 | 23.05513 | 0.009268 | 22.4  |
| 2355   | 2017 | 0.572 | 0.01 | 1.95559 | 3.8243317 | 22.17795 | 0.044716 | 33.84 |
| 2353   | 2017 | 0.439 | 0.01 | 1.95559 | 3.8243317 | 23.05513 | 0.009268 | 22.4  |
| 300224 | 2017 | 1.081 | 0.01 | 1.95559 | 3.8243317 | 22.07044 | 0.031615 | 50.17 |
| 2254   | 2017 | 0.063 | 0.01 | 1.95559 | 3.8243317 | 21.68606 | 0.048763 | 35.5  |
| 2237   | 2017 | 0.671 | 0.01 | 1.95559 | 3.8243317 | 23.26216 | 0.084625 | 35.87 |
| 300308 | 2017 | 0.012 | 0.01 | 1.95559 | 3.8243317 | 22.77867 | 0.040317 | 20.97 |
| 2363   | 2017 | -0.51 | 0.01 | 1.95559 | 3.8243317 | 21.91588 | 0.023136 | 42.24 |
| 2643   | 2017 | 0.91  | 0.01 | 1.95559 | 3.8243317 | 22.18263 | 0.094665 | 20.54 |
| 2041   | 2017 | 0.604 | 0.01 | 1.95559 | 3.8243317 | 22.21527 | 0.036289 | 53.19 |
| 2353   | 2017 | 0.324 | 0.01 | 1.95559 | 3.8243317 | 23.05513 | 0.009268 | 22.4  |
| 682    | 2017 | -0.18 | 0.01 | 1.95559 | 3.8243317 | 22.28998 | 0.059065 | 19.74 |
| 2355   | 2017 | 0.168 | 0.01 | 1.95559 | 3.8243317 | 22.08798 | 0.044716 | 33.84 |
| 682    | 2017 | 0.569 | 0.01 | 1.95559 | 3.8243317 | 22.28998 | 0.059065 | 19.74 |
| 2643   | 2017 | 0.91  | 0.01 | 1.95559 | 3.8243317 | 22.23884 | 0.094665 | 20.54 |
| 300308 | 2017 | 0.895 | 0.01 | 1.95559 | 3.8243317 | 22.25333 | 0.040317 | 20.97 |
| 2643   | 2017 | 0.91  | 0.01 | 1.95559 | 3.8243317 | 22.23884 | 0.094665 | 20.54 |
| 2643   | 2017 | 0.91  | 0.01 | 1.95559 | 3.8243317 | 22.23884 | 0.094665 | 20.54 |
| 2643   | 2017 | 0.91  | 0.01 | 1.95559 | 3.8243317 | 22.23884 | 0.094665 | 20.54 |
| 601966 | 2017 | -0.46 | 0.01 | 1.95559 | 3.8243317 | 23.68782 | 0.120335 | 50.35 |
| 682    | 2017 | -0.18 | 0.01 | 1.95559 | 3.8243317 | 22.28998 | 0.059065 | 19.74 |
| 2726   | 2017 | -0.55 | 0.01 | 1.95559 | 3.8243317 | 21.65688 | 0.09768  | 45.96 |
| 2726   | 2017 | -0.99 | 0.01 | 1.95559 | 3.8243317 | 21.65688 | 0.09768  | 45.96 |
| 2353   | 2017 | -0.03 | 0.01 | 1.95559 | 3.8243317 | 23.05513 | 0.009268 | 22.4  |
| 2675   | 2017 | 0.684 | 0.01 | 1.95559 | 3.8243317 | 22.38589 | 0.080495 | 19.62 |
| 2726   | 2017 | 0.333 | 0.01 | 1.95559 | 3.8243317 | 21.65688 | 0.09768  | 45.96 |
| 2355   | 2017 | -0.58 | 0.01 | 1.95559 | 3.8243317 | 22.17795 | 0.044716 | 33.84 |
| 2355   | 2017 | 0.523 | 0.01 | 1.95559 | 3.8243317 | 22.17795 | 0.044716 | 33.84 |
| 811    | 2017 | -0.51 | 0.01 | 1.95559 | 3.8243317 | 22.43867 | 0.116121 | 29.15 |
| 603779 | 2017 | -0.58 | 0.01 | 1.95559 | 3.8243317 | 21.15408 | 0.045674 | 47.23 |
| 682    | 2017 | -0.18 | 0.01 | 1.95559 | 3.8243317 | 22.28998 | 0.059065 | 19.74 |
| 601966 | 2017 | -0.19 | 0.01 | 1.95559 | 3.8243317 | 23.68782 | 0.120335 | 50.35 |

|        |      |       |      |          |           |          |          |       |
|--------|------|-------|------|----------|-----------|----------|----------|-------|
| 300224 | 2017 | -0.24 | 0.01 | 1.95559  | 3.8243317 | 22.07044 | 0.031615 | 50.17 |
| 2675   | 2017 | 0.684 | 0.01 | 1.95559  | 3.8243317 | 22.38589 | 0.080495 | 19.62 |
| 2353   | 2017 | 0.145 | 0.01 | 1.95559  | 3.8243317 | 23.05513 | 0.009268 | 22.4  |
| 600309 | 2017 | 0.666 | 0.01 | 1.95559  | 3.8243317 | 24.91031 | 0.302158 | 47.92 |
| 2041   | 2017 | 0.935 | 0.01 | 1.95559  | 3.8243317 | 21.57568 | 0.036289 | 53.19 |
| 682    | 2017 | 1.142 | 0.01 | 1.95559  | 3.8243317 | 22.28998 | 0.059065 | 19.74 |
| 2363   | 2017 | -0.51 | 0.01 | 1.95559  | 3.8243317 | 21.91588 | 0.023136 | 42.24 |
| 811    | 2017 | 0.005 | 0.01 | 1.95559  | 3.8243317 | 22.43867 | 0.116121 | 29.15 |
| 300105 | 2017 | 0.51  | 0.01 | 1.95559  | 3.8243317 | 21.59433 | 0.007079 | 23.25 |
| 2643   | 2017 | 0.91  | 0.01 | 1.95559  | 3.8243317 | 22.23884 | 0.094665 | 20.54 |
| 2374   | 2017 | -0.11 | 0.01 | 1.95559  | 3.8243317 | 22.57515 | 0.028816 | 13.34 |
| 2675   | 2017 | -0.54 | 0.01 | 1.95559  | 3.8243317 | 22.38589 | 0.080495 | 19.62 |
| 2726   | 2017 | -0.55 | 0.01 | 1.95559  | 3.8243317 | 21.65688 | 0.09768  | 45.96 |
| 2675   | 2017 | -0.2  | 0.01 | 1.95559  | 3.8243317 | 22.38589 | 0.080495 | 19.62 |
| 811    | 2017 | -0.41 | 0.01 | 1.95559  | 3.8243317 | 22.43867 | 0.116121 | 29.15 |
| 603779 | 2017 | -0.58 | 0.01 | 1.95559  | 3.8243317 | 21.35672 | 0.045674 | 47.23 |
| 300224 | 2017 | -0.24 | 0.01 | 1.95559  | 3.8243317 | 22.07044 | 0.031615 | 50.17 |
| 300423 | 2017 | -0.45 | 0.01 | 1.95559  | 3.8243317 | 20.40326 | 0.056975 | 44.26 |
| 300224 | 2017 | 0.124 | 0.01 | 1.95559  | 3.8243317 | 22.07044 | 0.031615 | 50.17 |
| 2041   | 2017 | -0.39 | 0.01 | 1.95559  | 3.8243317 | 22.21527 | 0.036289 | 53.19 |
| 682    | 2017 | 1.142 | 0.01 | 1.95559  | 3.8243317 | 22.28998 | 0.059065 | 19.74 |
| 682    | 2017 | -0.18 | 0.01 | 1.95559  | 3.8243317 | 22.28998 | 0.059065 | 19.74 |
| 2675   | 2017 | -0.64 | 0.01 | 1.95559  | 3.8243317 | 22.10228 | 0.080495 | 19.62 |
| 600309 | 2017 | 0.653 | 0.01 | 1.95559  | 3.8243317 | 24.91031 | 0.302158 | 47.92 |
| 600309 | 2017 | 0.658 | 0.01 | 1.95559  | 3.8243317 | 24.91031 | 0.302158 | 47.92 |
| 2237   | 2017 | 0.229 | 0.01 | 1.95559  | 3.8243317 | 23.28284 | 0.084625 | 35.87 |
| 600309 | 2017 | 0.632 | 0.01 | 1.95559  | 3.8243317 | 24.91031 | 0.302158 | 47.92 |
| 300423 | 2017 | -0.45 | 0.01 | 1.95559  | 3.8243317 | 20.40326 | 0.056975 | 44.26 |
| 601966 | 2017 | -0.42 | 0.01 | 1.95559  | 3.8243317 | 23.68782 | 0.120335 | 50.35 |
| 2675   | 2017 | 0.684 | 0.01 | 1.95559  | 3.8243317 | 22.38589 | 0.080495 | 19.62 |
| 300308 | 2017 | 0.895 | 0.01 | 1.95559  | 3.8243317 | 22.77867 | 0.040317 | 20.97 |
| 300109 | 2017 | 1.107 | 0.02 | 1.398889 | 1.9568903 | 21.39552 | 0.071134 | 19.67 |
| 2423   | 2017 | 0.138 | 0.02 | 1.398889 | 1.9568903 | 21.95462 | -0.16406 | 67.42 |
| 2448   | 2017 | -0.19 | 0.02 | 1.398889 | 1.9568903 | 22.06458 | 0.113816 | 17.78 |
| 2601   | 2017 | -0.63 | 0.02 | 1.398889 | 1.9568903 | 23.76045 | 0.194153 | 20.5  |
| 2601   | 2017 | 0.036 | 0.02 | 1.398889 | 1.9568903 | 23.56381 | 0.194153 | 20.5  |
| 600469 | 2017 | 0.718 | 0.02 | 1.398889 | 1.9568903 | 22.64414 | -0.24752 | 42.58 |
| 600469 | 2017 | -0.23 | 0.02 | 1.398889 | 1.9568903 | 22.72306 | -0.24752 | 42.58 |
| 2448   | 2017 | -0.33 | 0.02 | 1.398889 | 1.9568903 | 22.06458 | 0.113816 | 17.78 |
| 300109 | 2017 | 0.328 | 0.02 | 1.398889 | 1.9568903 | 21.39552 | 0.071134 | 19.67 |
| 2448   | 2017 | -0    | 0.02 | 1.398889 | 1.9568903 | 22.06458 | 0.113816 | 17.78 |
| 2448   | 2017 | -0.19 | 0.02 | 1.398889 | 1.9568903 | 22.06458 | 0.113816 | 17.78 |
| 600531 | 2017 | -0.72 | 0.02 | 1.398889 | 1.9568903 | 23.10819 | 0.090103 | 34.61 |
| 600469 | 2017 | 0.718 | 0.02 | 1.398889 | 1.9568903 | 22.72306 | -0.24752 | 42.58 |
| 2407   | 2017 | -0.59 | 0.02 | 1.398889 | 1.9568903 | 22.67431 | 0.09408  | 13.53 |
| 2423   | 2017 | 0.017 | 0.02 | 1.398889 | 1.9568903 | 21.95462 | -0.16406 | 67.42 |
| 2601   | 2017 | -0.54 | 0.02 | 1.398889 | 1.9568903 | 23.76045 | 0.194153 | 20.5  |
| 2601   | 2017 | 0.099 | 0.02 | 1.398889 | 1.9568903 | 23.76045 | 0.194153 | 20.5  |
| 2601   | 2017 | 0.393 | 0.02 | 1.398889 | 1.9568903 | 23.76045 | 0.194153 | 20.5  |
| 2448   | 2017 | 0.14  | 0.02 | 1.398889 | 1.9568903 | 22.06458 | 0.113816 | 17.78 |
| 2601   | 2017 | -0.41 | 0.02 | 1.398889 | 1.9568903 | 23.76045 | 0.194153 | 20.5  |
| 2601   | 2017 | -0.54 | 0.02 | 1.398889 | 1.9568903 | 23.76045 | 0.194153 | 20.5  |
| 2601   | 2017 | 0.393 | 0.02 | 1.398889 | 1.9568903 | 23.76045 | 0.194153 | 20.5  |
| 2423   | 2017 | -0.54 | 0.02 | 1.398889 | 1.9568903 | 21.95462 | -0.16406 | 67.42 |

|        |      |       |      |          |            |          |          |       |
|--------|------|-------|------|----------|------------|----------|----------|-------|
| 600469 | 2017 | -0.2  | 0.02 | 1.398889 | 1.9568903  | 22.72306 | -0.24752 | 42.58 |
| 2407   | 2017 | -0.59 | 0.02 | 1.398889 | 1.9568903  | 22.47058 | 0.09408  | 13.53 |
| 2448   | 2017 | -0.19 | 0.02 | 1.398889 | 1.9568903  | 22.06458 | 0.113816 | 17.78 |
| 2423   | 2017 | -0.54 | 0.02 | 1.398889 | 1.9568903  | 21.95462 | -0.16406 | 67.42 |
| 2448   | 2017 | 0.682 | 0.02 | 1.398889 | 1.9568903  | 22.06458 | 0.113816 | 17.78 |
| 2407   | 2017 | -0.59 | 0.02 | 1.398889 | 1.9568903  | 22.67431 | 0.09408  | 13.53 |
| 2601   | 2017 | 0.125 | 0.02 | 1.398889 | 1.9568903  | 23.76045 | 0.194153 | 20.5  |
| 2407   | 2017 | 0.221 | 0.02 | 1.398889 | 1.9568903  | 22.67431 | 0.09408  | 13.53 |
| 2448   | 2017 | 0.803 | 0.02 | 1.398889 | 1.9568903  | 22.06458 | 0.113816 | 17.78 |
| 2448   | 2017 | -0.35 | 0.02 | 1.398889 | 1.9568903  | 22.06458 | 0.113816 | 17.78 |
| 2423   | 2017 | -0.54 | 0.02 | 1.398889 | 1.9568903  | 21.95462 | -0.16406 | 67.42 |
| 600531 | 2017 | -0.55 | 0.02 | 1.398889 | 1.9568903  | 23.10819 | 0.090103 | 34.61 |
| 600531 | 2017 | -0.94 | 0.02 | 1.398889 | 1.9568903  | 23.12008 | 0.090103 | 34.61 |
| 300109 | 2017 | 1.107 | 0.02 | 1.398889 | 1.9568903  | 21.39552 | 0.071134 | 19.67 |
| 300109 | 2017 | -0.14 | 0.02 | 1.398889 | 1.9568903  | 21.39552 | 0.071134 | 19.67 |
| 300109 | 2017 | 0.445 | 0.02 | 1.398889 | 1.9568903  | 21.39552 | 0.071134 | 19.67 |
| 300109 | 2017 | 0.859 | 0.02 | 1.398889 | 1.9568903  | 21.36519 | 0.071134 | 19.67 |
| 600531 | 2017 | -0.55 | 0.02 | 1.398889 | 1.9568903  | 23.10819 | 0.090103 | 34.61 |
| 2448   | 2017 | -0.3  | 0.02 | 1.398889 | 1.9568903  | 22.06458 | 0.113816 | 17.78 |
| 2407   | 2017 | -0.59 | 0.02 | 1.398889 | 1.9568903  | 22.67431 | 0.09408  | 13.53 |
| 600531 | 2017 | -0.72 | 0.02 | 1.398889 | 1.9568903  | 23.10819 | 0.090103 | 34.61 |
| 2407   | 2017 | -0.22 | 0.02 | 1.398889 | 1.9568903  | 22.67431 | 0.09408  | 13.53 |
| 2601   | 2017 | 0.612 | 0.02 | 1.398889 | 1.9568903  | 23.76045 | 0.194153 | 20.5  |
| 2448   | 2017 | 0.078 | 0.02 | 1.398889 | 1.9568903  | 22.06458 | 0.113816 | 17.78 |
| 2448   | 2017 | 0.201 | 0.02 | 1.398889 | 1.9568903  | 21.8846  | 0.113816 | 17.78 |
| 2407   | 2017 | -0.59 | 0.02 | 1.398889 | 1.9568903  | 22.67431 | 0.09408  | 13.53 |
| 600469 | 2017 | -0.23 | 0.02 | 1.398889 | 1.9568903  | 22.72306 | -0.24752 | 42.58 |
| 2601   | 2017 | -0.54 | 0.02 | 1.398889 | 1.9568903  | 23.76045 | 0.194153 | 20.5  |
| 300109 | 2017 | -0.14 | 0.02 | 1.398889 | 1.9568903  | 21.39552 | 0.071134 | 19.67 |
| 2448   | 2017 | 0.174 | 0.02 | 1.398889 | 1.9568903  | 22.06458 | 0.113816 | 17.78 |
| 2448   | 2017 | -0.52 | 0.02 | 1.398889 | 1.9568903  | 22.06458 | 0.113816 | 17.78 |
| 600469 | 2017 | -0.23 | 0.02 | 1.398889 | 1.9568903  | 22.72306 | -0.24752 | 42.58 |
| 2601   | 2017 | -0.41 | 0.02 | 1.398889 | 1.9568903  | 23.76045 | 0.194153 | 20.5  |
| 600531 | 2017 | -0.72 | 0.02 | 1.398889 | 1.9568903  | 23.10819 | 0.090103 | 34.61 |
| 600531 | 2017 | -0.87 | 0.02 | 1.398889 | 1.9568903  | 23.10819 | 0.090103 | 34.61 |
| 300109 | 2017 | -0.22 | 0.02 | 1.398889 | 1.9568903  | 21.39552 | 0.071134 | 19.67 |
| 300109 | 2017 | -0.22 | 0.02 | 1.398889 | 1.9568903  | 21.39552 | 0.071134 | 19.67 |
| 2448   | 2017 | -0    | 0.02 | 1.398889 | 1.9568903  | 22.06458 | 0.113816 | 17.78 |
| 2407   | 2017 | -0.14 | 0.02 | 1.398889 | 1.9568903  | 22.67431 | 0.09408  | 13.53 |
| 2423   | 2017 | 0.138 | 0.02 | 1.398889 | 1.9568903  | 21.92226 | -0.16406 | 67.42 |
| 2423   | 2017 | -0.54 | 0.02 | 1.398889 | 1.9568903  | 21.95462 | -0.16406 | 67.42 |
| 2407   | 2017 | 0.221 | 0.02 | 1.398889 | 1.9568903  | 22.67431 | 0.09408  | 13.53 |
| 2407   | 2017 | -0.02 | 0.02 | 1.398889 | 1.9568903  | 22.67431 | 0.09408  | 13.53 |
| 600182 | 2017 | 0.41  | 0.02 | 0.230523 | 0.05314106 | 20.20239 | 0.082601 | 44.43 |
| 600182 | 2017 | 0.41  | 0.02 | 0.230523 | 0.05314106 | 21.74888 | 0.082601 | 44.43 |
| 600182 | 2017 | 0.41  | 0.02 | 0.230523 | 0.05314106 | 21.74888 | 0.082601 | 44.43 |
| 2812   | 2017 | -0.59 | 0    | 1.108848 | 1.2295433  | 21.43523 | 0.094212 | 27.06 |
| 2812   | 2017 | -0.42 | 0    | 1.108848 | 1.2295433  | 21.43523 | 0.094212 | 27.06 |
| 2812   | 2017 | -0.45 | 0    | 1.108848 | 1.2295433  | 21.20882 | 0.094212 | 27.06 |
| 2812   | 2017 | -0.44 | 0    | 1.108848 | 1.2295433  | 21.43523 | 0.094212 | 27.06 |
| 2812   | 2017 | -0.59 | 0    | 1.108848 | 1.2295433  | 21.43523 | 0.094212 | 27.06 |
| 2812   | 2017 | -0.21 | 0    | 1.108848 | 1.2295433  | 21.43523 | 0.094212 | 27.06 |
| 2812   | 2017 | -0.42 | 0    | 1.108848 | 1.2295433  | 21.43523 | 0.094212 | 27.06 |
| 513    | 2017 | -0.51 | 0.02 | 1.401748 | 1.964897   | 23.48944 | 0.302158 | 34.2  |

|        |      |       |      |          |          |          |          |       |
|--------|------|-------|------|----------|----------|----------|----------|-------|
| 300458 | 2017 | 2.647 | 0.02 | 1.401748 | 1.964897 | 21.5798  | -0.00084 | 9.23  |
| 651    | 2017 | -0.07 | 0.02 | 1.401748 | 1.964897 | 25.74206 | 0.302158 | 18.22 |
| 513    | 2017 | 0.247 | 0.02 | 1.401748 | 1.964897 | 23.48944 | 0.302158 | 34.2  |
| 300146 | 2017 | -0.07 | 0.02 | 1.401748 | 1.964897 | 22.53378 | 0.149418 | 48.34 |
| 300273 | 2017 | 0.296 | 0.02 | 1.401748 | 1.964897 | 22.09628 | 0.038078 | 20.01 |
| 513    | 2017 | 0.81  | 0.02 | 1.401748 | 1.964897 | 23.48944 | 0.302158 | 34.2  |
| 300050 | 2017 | 0.922 | 0.02 | 1.401748 | 1.964897 | 21.89648 | 0.03551  | 21    |
| 513    | 2017 | -0.25 | 0.02 | 1.401748 | 1.964897 | 23.48944 | 0.302158 | 34.2  |
| 300246 | 2017 | -0.03 | 0.02 | 1.401748 | 1.964897 | 20.5004  | 0.127626 | 33.53 |
| 300146 | 2017 | 0.039 | 0.02 | 1.401748 | 1.964897 | 22.53378 | 0.149418 | 48.34 |
| 532    | 2017 | 0.687 | 0.02 | 1.401748 | 1.964897 | 21.57199 | 0.074689 | 14.49 |
| 300529 | 2017 | 0.033 | 0.02 | 1.401748 | 1.964897 | 21.25531 | 0.204422 | 47.82 |
| 300050 | 2017 | 0.922 | 0.02 | 1.401748 | 1.964897 | 21.98398 | 0.03551  | 21    |
| 513    | 2017 | 0.285 | 0.02 | 1.401748 | 1.964897 | 23.48944 | 0.302158 | 34.2  |
| 300273 | 2017 | 0.959 | 0.02 | 1.401748 | 1.964897 | 22.09628 | 0.038078 | 20.01 |
| 532    | 2017 | 0.687 | 0.02 | 1.401748 | 1.964897 | 21.57199 | 0.074689 | 14.49 |
| 513    | 2017 | 0.368 | 0.02 | 1.401748 | 1.964897 | 23.48944 | 0.302158 | 34.2  |
| 300458 | 2017 | 2.647 | 0.02 | 1.401748 | 1.964897 | 21.5798  | -0.00084 | 9.23  |
| 300146 | 2017 | -0.07 | 0.02 | 1.401748 | 1.964897 | 22.53378 | 0.149418 | 48.34 |
| 300246 | 2017 | -0.34 | 0.02 | 1.401748 | 1.964897 | 20.5004  | 0.127626 | 33.53 |
| 651    | 2017 | -0.62 | 0.02 | 1.401748 | 1.964897 | 25.74206 | 0.302158 | 18.22 |
| 300458 | 2017 | 2.647 | 0.02 | 1.401748 | 1.964897 | 21.5798  | -0.00084 | 9.23  |
| 300381 | 2017 | 0.883 | 0.02 | 1.401748 | 1.964897 | 22.07011 | 0.050155 | 34.82 |
| 300381 | 2017 | 0.883 | 0.02 | 1.401748 | 1.964897 | 22.07011 | 0.050155 | 34.82 |
| 651    | 2017 | 0.139 | 0.02 | 1.401748 | 1.964897 | 25.74206 | 0.302158 | 18.22 |
| 2180   | 2017 | 0.938 | 0.02 | 1.401748 | 1.964897 | 23.0823  | 0.202927 | 65.38 |
| 2180   | 2017 | 0.087 | 0.02 | 1.401748 | 1.964897 | 24.29357 | 0.202927 | 65.38 |
| 651    | 2017 | 0.612 | 0.02 | 1.401748 | 1.964897 | 25.74206 | 0.302158 | 18.22 |
| 300273 | 2017 | 0.296 | 0.02 | 1.401748 | 1.964897 | 22.09628 | 0.038078 | 20.01 |
| 2180   | 2017 | -0.01 | 0.02 | 1.401748 | 1.964897 | 24.29357 | 0.202927 | 65.38 |
| 651    | 2017 | -0.62 | 0.02 | 1.401748 | 1.964897 | 25.74206 | 0.302158 | 18.22 |
| 651    | 2017 | 0.281 | 0.02 | 1.401748 | 1.964897 | 25.74206 | 0.302158 | 18.22 |
| 2063   | 2017 | 1.404 | 0.02 | 1.401748 | 1.964897 | 21.63747 | 0.079562 | 12.03 |
| 651    | 2017 | 0.205 | 0.02 | 1.401748 | 1.964897 | 25.74206 | 0.302158 | 18.22 |
| 513    | 2017 | -0.14 | 0.02 | 1.401748 | 1.964897 | 23.48944 | 0.302158 | 34.2  |
| 651    | 2017 | -0.07 | 0.02 | 1.401748 | 1.964897 | 25.74206 | 0.302158 | 18.22 |
| 300053 | 2017 | 0.045 | 0.02 | 1.401748 | 1.964897 | 21.73636 | 0.058293 | 18.37 |
| 300050 | 2017 | 0.259 | 0.02 | 1.401748 | 1.964897 | 21.98398 | 0.03551  | 21    |
| 651    | 2017 | 0.258 | 0.02 | 1.401748 | 1.964897 | 25.74206 | 0.302158 | 18.22 |
| 300246 | 2017 | -0.34 | 0.02 | 1.401748 | 1.964897 | 20.5004  | 0.127626 | 33.53 |
| 2180   | 2017 | 0.074 | 0.02 | 1.401748 | 1.964897 | 24.29357 | 0.202927 | 65.38 |
| 300246 | 2017 | -0.34 | 0.02 | 1.401748 | 1.964897 | 20.13579 | 0.127626 | 33.53 |
| 651    | 2017 | -0.25 | 0.02 | 1.401748 | 1.964897 | 25.74206 | 0.302158 | 18.22 |
| 300246 | 2017 | -0.03 | 0.02 | 1.401748 | 1.964897 | 20.5004  | 0.127626 | 33.53 |
| 2141   | 2017 | -0.06 | 0.02 | 1.401748 | 1.964897 | 21.07454 | 0.00348  | 26.03 |
| 300246 | 2017 | -0.34 | 0.02 | 1.401748 | 1.964897 | 20.5004  | 0.127626 | 33.53 |
| 651    | 2017 | -0.62 | 0.02 | 1.401748 | 1.964897 | 25.74206 | 0.302158 | 18.22 |
| 2180   | 2017 | 0.306 | 0.02 | 1.401748 | 1.964897 | 24.29357 | 0.202927 | 65.38 |
| 651    | 2017 | -0.62 | 0.02 | 1.401748 | 1.964897 | 25.74206 | 0.302158 | 18.22 |
| 532    | 2017 | -0.64 | 0.02 | 1.401748 | 1.964897 | 21.57199 | 0.074689 | 14.49 |
| 300273 | 2017 | 0.296 | 0.02 | 1.401748 | 1.964897 | 22.09628 | 0.038078 | 20.01 |
| 300053 | 2017 | -0.33 | 0.02 | 1.401748 | 1.964897 | 21.49758 | 0.058293 | 18.37 |
| 2492   | 2017 | 0.03  | 0.02 | 1.401748 | 1.964897 | 20.88805 | 0.049149 | 42.6  |
| 300246 | 2017 | -0.19 | 0.02 | 1.401748 | 1.964897 | 20.5004  | 0.127626 | 33.53 |

|        |      |       |      |          |          |          |          |       |
|--------|------|-------|------|----------|----------|----------|----------|-------|
| 2141   | 2017 | -0.06 | 0.02 | 1.401748 | 1.964897 | 21.07454 | 0.00348  | 26.03 |
| 651    | 2017 | -0.2  | 0.02 | 1.401748 | 1.964897 | 25.74206 | 0.302158 | 18.22 |
| 300529 | 2017 | -0.63 | 0.02 | 1.401748 | 1.964897 | 21.25531 | 0.204422 | 47.82 |
| 300381 | 2017 | 0.883 | 0.02 | 1.401748 | 1.964897 | 22.07011 | 0.050155 | 34.82 |
| 2063   | 2017 | 1.595 | 0.02 | 1.401748 | 1.964897 | 21.63747 | 0.079562 | 12.03 |
| 300273 | 2017 | 0.296 | 0.02 | 1.401748 | 1.964897 | 22.09628 | 0.038078 | 20.01 |
| 651    | 2017 | -0.13 | 0.02 | 1.401748 | 1.964897 | 25.74206 | 0.302158 | 18.22 |
| 300273 | 2017 | 0.959 | 0.02 | 1.401748 | 1.964897 | 22.4403  | 0.038078 | 20.01 |
| 300273 | 2017 | 0.296 | 0.02 | 1.401748 | 1.964897 | 22.09628 | 0.038078 | 20.01 |
| 2063   | 2017 | 1.853 | 0.02 | 1.401748 | 1.964897 | 21.63747 | 0.079562 | 12.03 |
| 651    | 2017 | 0.038 | 0.02 | 1.401748 | 1.964897 | 25.74206 | 0.302158 | 18.22 |
| 300146 | 2017 | -0.07 | 0.02 | 1.401748 | 1.964897 | 22.53378 | 0.149418 | 48.34 |
| 300273 | 2017 | 0.517 | 0.02 | 1.401748 | 1.964897 | 22.09628 | 0.038078 | 20.01 |
| 2141   | 2017 | 0.954 | 0.02 | 1.401748 | 1.964897 | 21.07454 | 0.00348  | 26.03 |
| 2492   | 2017 | -0.37 | 0.02 | 1.401748 | 1.964897 | 21.17624 | 0.049149 | 42.6  |
| 532    | 2017 | 0.043 | 0.02 | 1.401748 | 1.964897 | 21.57199 | 0.074689 | 14.49 |
| 300561 | 2017 | 0.33  | 0.02 | 1.401748 | 1.964897 | 20.45882 | 0.11694  | 37.78 |
| 651    | 2017 | 0.203 | 0.02 | 1.401748 | 1.964897 | 25.74206 | 0.302158 | 18.22 |
| 651    | 2017 | 0.032 | 0.02 | 1.401748 | 1.964897 | 25.74206 | 0.302158 | 18.22 |
| 651    | 2017 | -0.34 | 0.02 | 1.401748 | 1.964897 | 25.74206 | 0.302158 | 18.22 |
| 2180   | 2017 | 0.199 | 0.02 | 1.401748 | 1.964897 | 24.29357 | 0.202927 | 65.38 |
| 2180   | 2017 | -0.31 | 0.02 | 1.401748 | 1.964897 | 24.29357 | 0.202927 | 65.38 |
| 300050 | 2017 | 0.591 | 0.02 | 1.401748 | 1.964897 | 21.98398 | 0.03551  | 21    |
| 2492   | 2017 | -0.76 | 0.02 | 1.401748 | 1.964897 | 21.17624 | 0.049149 | 42.6  |
| 2492   | 2017 | 0.03  | 0.02 | 1.401748 | 1.964897 | 21.17624 | 0.049149 | 42.6  |
| 300381 | 2017 | 0.883 | 0.02 | 1.401748 | 1.964897 | 22.07011 | 0.050155 | 34.82 |
| 300381 | 2017 | 0.883 | 0.02 | 1.401748 | 1.964897 | 22.07011 | 0.050155 | 34.82 |
| 2141   | 2017 | -0.06 | 0.02 | 1.401748 | 1.964897 | 21.07454 | 0.00348  | 26.03 |
| 651    | 2017 | -0.13 | 0.02 | 1.401748 | 1.964897 | 25.74206 | 0.302158 | 18.22 |
| 651    | 2017 | -0.06 | 0.02 | 1.401748 | 1.964897 | 25.74206 | 0.302158 | 18.22 |
| 2017   | 2017 | 0.974 | 0.02 | 1.401748 | 1.964897 | 21.16251 | 0.039627 | 29.13 |
| 651    | 2017 | -0.62 | 0.02 | 1.401748 | 1.964897 | 25.74206 | 0.302158 | 18.22 |
| 651    | 2017 | -0.07 | 0.02 | 1.401748 | 1.964897 | 25.74206 | 0.302158 | 18.22 |
| 513    | 2017 | 0.81  | 0.02 | 1.401748 | 1.964897 | 23.48944 | 0.302158 | 34.2  |
| 651    | 2017 | 0.111 | 0.02 | 1.401748 | 1.96E+00 | 25.74206 | 0.302158 | 18.22 |
| 2492   | 2017 | -0.76 | 0.02 | 1.401748 | 1.96E+00 | 21.17624 | 0.049149 | 42.6  |
| 300053 | 2017 | 0.108 | 0.02 | 1.401748 | 1.96E+00 | 21.73636 | 0.058293 | 18.37 |
| 300146 | 2017 | -0.69 | 0.02 | 1.401748 | 1.96E+00 | 22.53378 | 0.149418 | 48.34 |
| 300381 | 2017 | 0.883 | 0.02 | 1.401748 | 1.96E+00 | 21.58855 | 0.050155 | 34.82 |
| 2180   | 2017 | 0.142 | 0.02 | 1.401748 | 1.96E+00 | 24.29357 | 0.202927 | 65.38 |
| 651    | 2017 | 0.038 | 0.02 | 1.401748 | 1.964897 | 25.74206 | 0.302158 | 18.22 |
| 300053 | 2017 | 0.991 | 0.02 | 1.401748 | 1.964897 | 21.73636 | 0.058293 | 18.37 |
| 300273 | 2017 | 0.296 | 0.02 | 1.401748 | 1.964897 | 22.09628 | 0.038078 | 20.01 |
| 300529 | 2017 | -0.63 | 0.02 | 1.401748 | 1.964897 | 21.25416 | 0.204422 | 47.82 |
| 513    | 2017 | 0.81  | 0.02 | 1.401748 | 1.964897 | 23.48944 | 0.302158 | 34.2  |
| 300053 | 2017 | 0.328 | 0.02 | 1.401748 | 1.964897 | 21.73636 | 0.058293 | 18.37 |
| 300050 | 2017 | 0.591 | 0.02 | 1.401748 | 1.964897 | 21.98398 | 0.03551  | 21    |
| 300561 | 2017 | 0.33  | 0.02 | 1.401748 | 1.964897 | 20.4588  | 0.11694  | 37.78 |
| 300529 | 2017 | -0.38 | 0.02 | 1.401748 | 1.964897 | 21.25531 | 0.204422 | 47.82 |
| 300529 | 2017 | 0.033 | 0.02 | 1.401748 | 1.964897 | 21.25531 | 0.204422 | 47.82 |
| 651    | 2017 | -0.05 | 0.02 | 1.401748 | 1.964897 | 25.74206 | 0.302158 | 18.22 |
| 300246 | 2017 | -0.34 | 0.02 | 1.401748 | 1.964897 | 20.5004  | 0.127626 | 33.53 |
| 300458 | 2017 | 2.647 | 0.02 | 1.401748 | 1.964897 | 21.5798  | -0.00084 | 9.23  |
| 300050 | 2017 | 0.591 | 0.02 | 1.401748 | 1.964897 | 21.98398 | 0.03551  | 21    |

|        |      |       |      |          |          |          |          |       |
|--------|------|-------|------|----------|----------|----------|----------|-------|
| 300458 | 2017 | 2.647 | 0.02 | 1.401748 | 1.964897 | 21.5798  | -0.00084 | 9.23  |
| 2141   | 2017 | 0.071 | 0.02 | 1.401748 | 1.964897 | 21.07454 | 0.00348  | 26.03 |
| 651    | 2017 | -0.62 | 0.02 | 1.401748 | 1.964897 | 25.74206 | 0.302158 | 18.22 |
| 2063   | 2017 | 1.404 | 0.02 | 1.401748 | 1.964897 | 21.62753 | 0.079562 | 12.03 |
| 651    | 2017 | 0.038 | 0.02 | 1.401748 | 1.964897 | 25.74206 | 0.302158 | 18.22 |
| 2141   | 2017 | -0.06 | 0.02 | 1.401748 | 1.964897 | 21.07454 | 0.00348  | 26.03 |
| 651    | 2017 | 0.7   | 0.02 | 1.401748 | 1.964897 | 25.74206 | 0.302158 | 18.22 |
| 300458 | 2017 | 2.647 | 0.02 | 1.401748 | 1.964897 | 21.5798  | -0.00084 | 9.23  |
| 300053 | 2017 | 0.991 | 0.02 | 1.401748 | 1.964897 | 21.73636 | 0.058293 | 18.37 |
| 300381 | 2017 | 0.883 | 0.02 | 1.401748 | 1.964897 | 22.07011 | 0.050155 | 34.82 |
| 2180   | 2017 | 0.039 | 0.02 | 1.401748 | 1.964897 | 24.29357 | 0.202927 | 65.38 |
| 300561 | 2017 | 0.33  | 0.02 | 1.401748 | 1.964897 | 20.4588  | 0.11694  | 37.78 |
| 2141   | 2017 | -0.06 | 0.02 | 1.401748 | 1.964897 | 21.07454 | 0.00348  | 26.03 |
| 532    | 2017 | -0.18 | 0.02 | 1.401748 | 1.964897 | 21.57199 | 0.074689 | 14.49 |
| 513    | 2017 | 0.81  | 0.02 | 1.401748 | 1.964897 | 23.48944 | 0.302158 | 34.2  |
| 300381 | 2017 | 0.883 | 0.02 | 1.401748 | 1.964897 | 22.07011 | 0.050155 | 34.82 |
| 651    | 2017 | 0.2   | 0.02 | 1.401748 | 1.964897 | 25.74206 | 0.302158 | 18.22 |
| 651    | 2017 | -0.05 | 0.02 | 1.401748 | 1.964897 | 25.74206 | 0.302158 | 18.22 |
| 300381 | 2017 | 0.883 | 0.02 | 1.401748 | 1.964897 | 22.07011 | 0.050155 | 34.82 |
| 513    | 2017 | 0.81  | 0.02 | 1.401748 | 1.964897 | 23.48944 | 0.302158 | 34.2  |
| 300246 | 2017 | -0.28 | 0.02 | 1.401748 | 1.964897 | 20.5004  | 0.127626 | 33.53 |
| 2017   | 2017 | 0.974 | 0.02 | 1.401748 | 1.964897 | 21.13568 | 0.039627 | 29.13 |
| 300053 | 2017 | 0.045 | 0.02 | 1.401748 | 1.964897 | 21.73636 | 0.058293 | 18.37 |
| 300246 | 2017 | 0.325 | 0.02 | 1.401748 | 1.964897 | 20.5004  | 0.127626 | 33.53 |
| 300381 | 2017 | 0.883 | 0.02 | 1.401748 | 1.96E+00 | 22.07011 | 0.050155 | 34.82 |
| 2141   | 2017 | -0.06 | 0.02 | 1.401748 | 1.96E+00 | 21.20022 | 0.00348  | 26.03 |
| 300246 | 2017 | -0.34 | 0.02 | 1.401748 | 1.96E+00 | 20.5004  | 0.127626 | 33.53 |
| 651    | 2017 | -0.62 | 0.02 | 1.401748 | 1.96E+00 | 25.74206 | 0.302158 | 18.22 |
| 300050 | 2017 | 0.922 | 0.02 | 1.401748 | 1.96E+00 | 21.98398 | 0.03551  | 21    |
| 513    | 2017 | 0.81  | 0.02 | 1.401748 | 1.96E+00 | 23.48944 | 0.302158 | 34.2  |
| 651    | 2017 | -0.29 | 0.02 | 1.401748 | 1.96E+00 | 25.74206 | 0.302158 | 18.22 |
| 300146 | 2017 | -0.69 | 0.02 | 1.401748 | 1.96E+00 | 22.53378 | 0.149418 | 48.34 |
| 651    | 2017 | 0.038 | 0.02 | 1.401748 | 1.96E+00 | 25.74206 | 0.302158 | 18.22 |
| 2180   | 2017 | -0.21 | 0.02 | 1.401748 | 1.964897 | 24.29357 | 0.202927 | 65.38 |
| 513    | 2017 | 0.28  | 0.02 | 1.401748 | 1.964897 | 23.48944 | 0.302158 | 34.2  |
| 2180   | 2017 | 0.938 | 0.02 | 1.401748 | 1.964897 | 24.29357 | 0.202927 | 65.38 |
| 300381 | 2017 | 0.883 | 0.02 | 1.401748 | 1.964897 | 22.07011 | 0.050155 | 34.82 |
| 651    | 2017 | -0.07 | 0.02 | 1.401748 | 1.964897 | 25.74206 | 0.302158 | 18.22 |
| 300050 | 2017 | 0.591 | 0.02 | 1.401748 | 1.964897 | 21.98398 | 0.03551  | 21    |
| 300458 | 2017 | 2.647 | 0.02 | 1.401748 | 1.964897 | 21.52173 | -0.00084 | 9.23  |
| 651    | 2017 | 0.132 | 0.02 | 1.401748 | 1.964897 | 25.74206 | 0.302158 | 18.22 |
| 513    | 2017 | 0.368 | 0.02 | 1.401748 | 1.964897 | 23.48944 | 0.302158 | 34.2  |
| 300273 | 2017 | 0.296 | 0.02 | 1.401748 | 1.964897 | 22.09628 | 0.038078 | 20.01 |
| 300146 | 2017 | -0.07 | 0.02 | 1.401748 | 1.964897 | 22.45669 | 0.149418 | 48.34 |
| 2017   | 2017 | 0.974 | 0.02 | 1.401748 | 1.96E+00 | 21.16251 | 0.039627 | 29.13 |
| 651    | 2017 | -0.27 | 0.02 | 1.401748 | 1.96E+00 | 25.74206 | 0.302158 | 18.22 |
| 532    | 2017 | -0.21 | 0.02 | 1.401748 | 1.96E+00 | 21.33703 | 0.074689 | 14.49 |
| 300146 | 2017 | 0.523 | 0.02 | 1.401748 | 1.96E+00 | 22.53378 | 0.149418 | 48.34 |
| 651    | 2017 | -0.62 | 0.02 | 1.401748 | 1.96E+00 | 25.74206 | 0.302158 | 18.22 |
| 2063   | 2017 | 1.026 | 0.02 | 1.401748 | 1.964897 | 21.63747 | 0.079562 | 12.03 |
| 2063   | 2017 | 0.742 | 0.02 | 1.401748 | 1.964897 | 21.63747 | 0.079562 | 12.03 |
| 2017   | 2017 | 0.974 | 0.02 | 1.401748 | 1.964897 | 21.16251 | 0.039627 | 29.13 |
| 513    | 2017 | -0.51 | 0.02 | 1.401748 | 1.964897 | 23.48944 | 0.302158 | 34.2  |
| 513    | 2017 | 0.81  | 0.02 | 1.401748 | 1.964897 | 23.48944 | 0.302158 | 34.2  |

|        |      |       |      |          |            |          |          |       |
|--------|------|-------|------|----------|------------|----------|----------|-------|
| 300146 | 2017 | 0.523 | 0.02 | 1.401748 | 1.964897   | 22.53378 | 0.149418 | 48.34 |
| 651    | 2017 | -0.27 | 0.02 | 1.401748 | 1.964897   | 25.74206 | 0.302158 | 18.22 |
| 513    | 2017 | 0.81  | 0.02 | 1.401748 | 1.964897   | 23.25598 | 0.302158 | 34.2  |
| 300458 | 2017 | 2.647 | 0.02 | 1.401748 | 1.964897   | 21.5798  | -0.00084 | 9.23  |
| 300050 | 2017 | 0.48  | 0.02 | 1.401748 | 1.964897   | 21.98398 | 0.03551  | 21    |
| 2141   | 2017 | 0.954 | 0.02 | 1.401748 | 1.964897   | 21.07454 | 0.00348  | 26.03 |
| 2063   | 2017 | 1.853 | 0.02 | 1.401748 | 1.964897   | 21.63747 | 0.079562 | 12.03 |
| 2661   | 2017 | -0.57 | 0.04 | 0.875849 | 0.76711088 | 21.81964 | 0.052034 | 44.49 |
| 2661   | 2017 | 0.453 | 0.04 | 0.875849 | 0.76711088 | 21.7524  | 0.052034 | 44.49 |
| 2661   | 2017 | -0.87 | 0.04 | 0.875849 | 0.76711088 | 21.7524  | 0.052034 | 44.49 |
| 300123 | 2017 | -0.51 | 0.04 | 0.875849 | 0.76711088 | 22.29972 | 0.022084 | 29.47 |
| 603989 | 2017 | 0.108 | 0.04 | 0.875849 | 0.76711088 | 21.52103 | 0.156399 | 48.84 |
| 2412   | 2017 | 0.685 | 0.04 | 0.875849 | 0.76711088 | 21.25414 | 0.089242 | 42.13 |
| 300123 | 2017 | -0.51 | 0.04 | 0.875849 | 0.76711088 | 22.29972 | 0.022084 | 29.47 |
| 300123 | 2017 | -0.51 | 0.04 | 0.875849 | 0.76711088 | 22.29972 | 0.022084 | 29.47 |
| 2412   | 2017 | 0.685 | 0.04 | 0.875849 | 0.76711088 | 21.25414 | 0.089242 | 42.13 |
| 300123 | 2017 | -0.51 | 0.04 | 0.875849 | 0.76711088 | 22.29972 | 0.022084 | 29.47 |
| 300123 | 2017 | -0.51 | 0.04 | 0.875849 | 0.76711088 | 22.29972 | 0.022084 | 29.47 |
| 603989 | 2017 | -0.55 | 0.04 | 0.875849 | 0.76711088 | 21.56961 | 0.156399 | 48.84 |
| 2412   | 2017 | 0.685 | 0.04 | 0.875849 | 0.76711088 | 21.25414 | 0.089242 | 42.13 |
| 603989 | 2017 | 0.075 | 0.04 | 0.875849 | 0.76711088 | 21.56961 | 0.156399 | 48.84 |
| 300123 | 2017 | -0.51 | 0.04 | 0.875849 | 0.76711088 | 22.29972 | 0.022084 | 29.47 |
| 2412   | 2017 | 0.685 | 0.04 | 0.875849 | 0.76711088 | 21.25414 | 0.089242 | 42.13 |
| 2661   | 2017 | -0.68 | 0.04 | 0.875849 | 0.76711088 | 21.81964 | 0.052034 | 44.49 |
| 603989 | 2017 | 0.108 | 0.04 | 0.875849 | 0.76711088 | 21.56961 | 0.156399 | 48.84 |
| 2412   | 2017 | 0.685 | 0.04 | 0.875849 | 0.76711088 | 21.23601 | 0.089242 | 42.13 |
| 2661   | 2017 | -0.68 | 0.04 | 0.875849 | 0.76711088 | 21.81964 | 0.052034 | 44.49 |
| 2661   | 2017 | -0.43 | 0.04 | 0.875849 | 0.76711088 | 21.81964 | 0.052034 | 44.49 |
| 300123 | 2017 | -0.51 | 0.04 | 0.875849 | 0.76711088 | 22.29972 | 0.022084 | 29.47 |
| 300123 | 2017 | -0.51 | 0.04 | 0.875849 | 0.76711088 | 22.29972 | 0.022084 | 29.47 |
| 603989 | 2017 | -0.06 | 0.04 | 0.875849 | 0.76711088 | 21.56961 | 0.156399 | 48.84 |
| 603989 | 2017 | 0.108 | 0.04 | 0.875849 | 0.76711088 | 21.56961 | 0.156399 | 48.84 |
| 2412   | 2017 | 0.685 | 0.04 | 0.875849 | 0.76711088 | 21.25414 | 0.089242 | 42.13 |
| 603989 | 2017 | 0.771 | 0.04 | 0.875849 | 0.76711088 | 21.56961 | 0.156399 | 48.84 |
| 300123 | 2017 | -0.51 | 0.04 | 0.875849 | 0.76711088 | 22.29972 | 0.022084 | 29.47 |
| 300123 | 2017 | -0.51 | 0.04 | 0.875849 | 0.76711088 | 22.60295 | 0.022084 | 29.47 |
| 2530   | 2017 | 0.611 | 0.02 | 1.423309 | 2.0258072  | 22.29051 | 0.059567 | 19.75 |
| 816    | 2017 | -0.21 | 0.02 | 1.423309 | 2.0258072  | 22.54233 | -0.08781 | 26.06 |
| 2530   | 2017 | 0.429 | 0.02 | 1.423309 | 2.0258072  | 22.29051 | 0.059567 | 19.75 |
| 600805 | 2017 | -0.18 | 0.02 | 1.423309 | 2.0258072  | 22.99156 | -0.04678 | 28.05 |
| 816    | 2017 | -0.14 | 0.02 | 1.423309 | 2.0258072  | 22.54233 | -0.08781 | 26.06 |
| 2323   | 2017 | 0.438 | 0.02 | 1.423309 | 2.0258072  | 22.09642 | 0.302158 | 44.68 |
| 2496   | 2017 | 0.777 | 0.02 | 1.423309 | 2.0258072  | 22.81759 | 0.103594 | 42.2  |
| 600805 | 2017 | -0.23 | 0.02 | 1.423309 | 2.0258072  | 22.99156 | -0.04678 | 28.05 |
| 2530   | 2017 | 0.498 | 0.02 | 1.423309 | 2.0258072  | 22.29051 | 0.059567 | 19.75 |
| 2496   | 2017 | -0.55 | 0.02 | 1.423309 | 2.0258072  | 22.81759 | 0.103594 | 42.2  |
| 2496   | 2017 | 0.724 | 0.02 | 1.423309 | 2.0258072  | 22.81759 | 0.103594 | 42.2  |
| 2496   | 2017 | 0.777 | 0.02 | 1.423309 | 2.0258072  | 22.81759 | 0.103594 | 42.2  |
| 816    | 2017 | 0.084 | 0.02 | 1.423309 | 2.0258072  | 22.36926 | -0.08781 | 26.06 |
| 600805 | 2017 | -0.18 | 0.02 | 1.423309 | 2.0258072  | 22.99156 | -0.04678 | 28.05 |
| 600805 | 2017 | 0.041 | 0.02 | 1.423309 | 2.0258072  | 22.99156 | -0.04678 | 28.05 |
| 600805 | 2017 | 0.433 | 0.02 | 1.423309 | 2.0258072  | 22.99156 | -0.04678 | 28.05 |
| 600805 | 2017 | 0.433 | 0.02 | 1.423309 | 2.0258072  | 22.99156 | -0.04678 | 28.05 |
| 2530   | 2017 | 0.644 | 0.02 | 1.423309 | 2.0258072  | 22.29051 | 0.059567 | 19.75 |

|        |      |       |      |          |           |          |          |       |
|--------|------|-------|------|----------|-----------|----------|----------|-------|
| 2530   | 2017 | 0.718 | 0.02 | 1.423309 | 2.0258072 | 22.29051 | 0.059567 | 19.75 |
| 2530   | 2017 | 0.644 | 0.02 | 1.423309 | 2.0258072 | 22.29051 | 0.059567 | 19.75 |
| 2530   | 2017 | 0.644 | 0.02 | 1.423309 | 2.0258072 | 22.29051 | 0.059567 | 19.75 |
| 816    | 2017 | -0.21 | 0.02 | 1.423309 | 2.0258072 | 22.54233 | -0.08781 | 26.06 |
| 600805 | 2017 | -0.23 | 0.02 | 1.423309 | 2.0258072 | 22.99156 | -0.04678 | 28.05 |
| 2323   | 2017 | 0.226 | 0.02 | 1.423309 | 2.0258072 | 21.70023 | 0.302158 | 44.68 |
| 2530   | 2017 | 0.895 | 0.02 | 1.423309 | 2.0258072 | 22.29051 | 0.059567 | 19.75 |
| 2530   | 2017 | 0.498 | 0.02 | 1.423309 | 2.0258072 | 22.29051 | 0.059567 | 19.75 |
| 2496   | 2017 | 0.777 | 0.02 | 1.423309 | 2.0258072 | 22.57361 | 0.103594 | 42.2  |
| 2323   | 2017 | -0.44 | 0.02 | 1.423309 | 2.0258072 | 21.70023 | 0.302158 | 44.68 |
| 600805 | 2017 | 0.041 | 0.02 | 1.423309 | 2.0258072 | 22.99156 | -0.04678 | 28.05 |
| 816    | 2017 | 0.084 | 0.02 | 1.423309 | 2.0258072 | 22.54233 | -0.08781 | 26.06 |
| 2323   | 2017 | -0.44 | 0.02 | 1.423309 | 2.0258072 | 21.70023 | 0.302158 | 44.68 |
| 2323   | 2017 | -0.44 | 0.02 | 1.423309 | 2.0258072 | 21.70023 | 0.302158 | 44.68 |
| 600805 | 2017 | 0.041 | 0.02 | 1.423309 | 2.0258072 | 22.99156 | -0.04678 | 28.05 |
| 2323   | 2017 | 0.802 | 0.02 | 1.423309 | 2.0258072 | 21.70023 | 0.302158 | 44.68 |
| 2496   | 2017 | 0.777 | 0.02 | 1.423309 | 2.0258072 | 22.81759 | 0.103594 | 42.2  |
| 816    | 2017 | -0.13 | 0.02 | 1.423309 | 2.0258072 | 22.54233 | -0.08781 | 26.06 |
| 2496   | 2017 | 0.777 | 0.02 | 1.423309 | 2.0258072 | 22.81759 | 0.103594 | 42.2  |
| 2496   | 2017 | 0.777 | 0.02 | 1.423309 | 2.0258072 | 22.81759 | 0.103594 | 42.2  |
| 2496   | 2017 | 0.777 | 0.02 | 1.423309 | 2.0258072 | 22.81759 | 0.103594 | 42.2  |
| 2323   | 2017 | 0.226 | 0.02 | 1.423309 | 2.0258072 | 21.70023 | 0.302158 | 44.68 |
| 816    | 2017 | 0.652 | 0.02 | 1.423309 | 2.0258072 | 22.54233 | -0.08781 | 26.06 |
| 2530   | 2017 | 0.644 | 0.02 | 1.423309 | 2.0258072 | 22.29051 | 0.059567 | 19.75 |
| 2530   | 2017 | 1.116 | 0.02 | 1.423309 | 2.0258072 | 22.09019 | 0.059567 | 19.75 |
| 2530   | 2017 | 0.644 | 0.02 | 1.423309 | 2.0258072 | 22.29051 | 0.059567 | 19.75 |
| 2323   | 2017 | -0.44 | 0.02 | 1.423309 | 2.0258072 | 21.70023 | 0.302158 | 44.68 |
| 2530   | 2017 | 0.644 | 0.02 | 1.423309 | 2.0258072 | 22.29051 | 0.059567 | 19.75 |
| 2530   | 2017 | 0.644 | 0.02 | 1.423309 | 2.0258072 | 22.29051 | 0.059567 | 19.75 |
| 600805 | 2017 | 0.041 | 0.02 | 1.423309 | 2.0258072 | 22.99156 | -0.04678 | 28.05 |
| 600805 | 2017 | -0.26 | 0.02 | 1.423309 | 2.0258072 | 23.05762 | -0.04678 | 28.05 |
| 2496   | 2017 | 0.777 | 0.02 | 1.423309 | 2.0258072 | 22.81759 | 0.103594 | 42.2  |
| 600805 | 2017 | 0.041 | 0.02 | 1.423309 | 2.0258072 | 22.99156 | -0.04678 | 28.05 |
| 2496   | 2017 | 0.512 | 0.02 | 1.423309 | 2.0258072 | 22.81759 | 0.103594 | 42.2  |
| 59     | 2017 | -0.76 | 0    | 1.267243 | 1.6059042 | 24.15623 | 0.153278 | 32.16 |
| 59     | 2017 | -0.15 | 0    | 1.267243 | 1.6059042 | 24.03748 | 0.153278 | 32.16 |
| 59     | 2017 | -0.15 | 0    | 1.267243 | 1.6059042 | 24.15623 | 0.153278 | 32.16 |
| 59     | 2017 | -0.15 | 0    | 1.267243 | 1.6059042 | 24.15623 | 0.123324 | 32.16 |
| 59     | 2017 | -0.64 | 0    | 1.267243 | 1.6059042 | 24.15623 | 0.153278 | 32.16 |
| 59     | 2017 | -0.95 | 0    | 1.267243 | 1.6059042 | 24.15623 | 0.153278 | 32.16 |
| 2366   | 2017 | -0.03 | 0.01 | 1.778461 | 3.1629233 | 22.69028 | 0.302158 | 43.1  |
| 2366   | 2017 | -0.06 | 0.01 | 1.778461 | 3.1629233 | 22.69028 | 0.302158 | 43.1  |
| 2366   | 2017 | -0.1  | 0.01 | 1.778461 | 3.1629233 | 22.69028 | 0.302158 | 43.1  |
| 2366   | 2017 | -0.16 | 0.01 | 1.778461 | 3.1629233 | 22.69028 | 0.302158 | 43.1  |
| 603027 | 2017 | -0.19 | 0.01 | 1.778461 | 3.1629233 | 20.90236 | 0.135523 | 43.53 |
| 2366   | 2017 | -0.06 | 0.01 | 1.778461 | 3.1629233 | 22.10174 | 0.302158 | 43.1  |
| 603027 | 2017 | 0.471 | 0.01 | 1.778461 | 3.1629233 | 20.90236 | 0.135523 | 43.53 |
| 603027 | 2017 | -0.85 | 0.01 | 1.778461 | 3.1629233 | 20.82303 | 0.135523 | 43.53 |
| 603027 | 2017 | -0.85 | 0.01 | 1.778461 | 3.1629233 | 20.90236 | 0.135523 | 43.53 |
| 603027 | 2017 | 0.471 | 0.01 | 1.778461 | 3.1629233 | 20.90236 | 0.135523 | 43.53 |
| 2366   | 2017 | -0.06 | 0.01 | 1.778461 | 3.1629233 | 22.69028 | 0.302158 | 43.1  |
| 2366   | 2017 | -0.1  | 0.01 | 1.778461 | 3.1629233 | 22.69028 | 0.302158 | 43.1  |
| 962    | 2017 | 0.762 | 0    | 1.409542 | 1.9868074 | 21.43769 | -0.34246 | 45.8  |
| 600165 | 2017 | 0.242 | 0    | 1.409542 | 1.9868074 | 21.55576 | 0.040335 | 29.2  |



|        |      |       |      |          |            |          |          |       |
|--------|------|-------|------|----------|------------|----------|----------|-------|
| 962    | 2017 | 0.762 | 0    | 1.409542 | 1.9868074  | 21.41401 | -0.34246 | 45.8  |
| 600165 | 2017 | 0.132 | 0    | 1.409542 | 1.9868074  | 21.55576 | 0.040335 | 29.2  |
| 600165 | 2017 | -0.2  | 0    | 1.409542 | 1.9868074  | 21.55576 | 0.040335 | 29.2  |
| 962    | 2017 | 0.762 | 0    | 1.409542 | 1.9868074  | 21.43769 | -0.34246 | 45.8  |
| 962    | 2017 | 0.762 | 0    | 1.409542 | 1.9868074  | 21.43769 | -0.34246 | 45.8  |
| 962    | 2017 | 0.762 | 0    | 1.409542 | 1.9868074  | 21.43769 | -0.34246 | 45.8  |
| 962    | 2017 | 0.762 | 0    | 1.409542 | 1.9868074  | 21.43769 | -0.34246 | 45.8  |
| 962    | 2017 | 0.762 | 0    | 1.409542 | 1.9868074  | 21.43769 | -0.34246 | 45.8  |
| 600165 | 2017 | 0.242 | 0    | 1.409542 | 1.9868074  | 21.51629 | 0.040335 | 29.2  |
| 600165 | 2017 | 0.132 | 0    | 1.409542 | 1.9868074  | 21.55576 | 0.040335 | 29.2  |
| 600165 | 2017 | 0.242 | 0    | 1.409542 | 1.9868074  | 21.55576 | 0.040335 | 29.2  |
| 600165 | 2017 | 0.242 | 0    | 1.409542 | 1.9868074  | 21.55576 | 0.040335 | 29.2  |
| 600352 | 2017 | -0.73 | 0.05 | 0.059264 | 0.00351219 | 24.55955 | 0.144328 | 11.98 |
| 600261 | 2017 | -0.3  | 0.05 | 0.059264 | 0.00351219 | 22.59457 | 0.11872  | 32.14 |
| 2617   | 2017 | -0.69 | 0.05 | 0.059264 | 0.00351219 | 22.56477 | 0.123311 | 37.77 |
| 600790 | 2017 | -0.47 | 0.05 | 0.059264 | 0.00351219 | 22.89091 | 0.078785 | 35.78 |
| 600387 | 2017 | 0.619 | 0.05 | 0.059264 | 0.00351219 | 23.01173 | -0.00609 | 18.49 |
| 2263   | 2017 | 0.732 | 0.05 | 0.059264 | 0.00351219 | 21.92136 | -0.25958 | 28.09 |
| 2590   | 2017 | -0.05 | 0.05 | 0.059264 | 0.00351219 | 21.97474 | 0.070084 | 45.86 |
| 2001   | 2017 | 0.802 | 0.05 | 0.059264 | 0.00351219 | 23.62374 | 0.122448 | 48.55 |
| 600216 | 2017 | 0.661 | 0.05 | 0.059264 | 0.00351219 | 23.00498 | 0.030793 | 22.51 |
| 2203   | 2017 | -0.16 | 0.05 | 0.059264 | 0.00351219 | 23.44981 | 0.130461 | 48.31 |
| 2440   | 2017 | 0.73  | 0.05 | 0.059264 | 0.00351219 | 22.91816 | 0.130388 | 16.73 |
| 2006   | 2017 | -0.22 | 0.05 | 0.059264 | 0.00351219 | 21.30115 | 0.09166  | 30.16 |
| 603703 | 2017 | -0.35 | 0.05 | 0.059264 | 0.00351219 | 20.79926 | 0.045457 | 33.32 |
| 2520   | 2017 | 0.23  | 0.05 | 0.059264 | 0.00351219 | 21.69104 | 0.03364  | 44.78 |
| 603703 | 2017 | -0.35 | 0.05 | 0.059264 | 0.00351219 | 20.76762 | 0.045457 | 33.32 |
| 2520   | 2017 | 0.23  | 0.05 | 0.059264 | 0.00351219 | 21.386   | 0.03364  | 44.78 |
| 2440   | 2017 | 0.73  | 0.05 | 0.059264 | 0.00351219 | 22.91816 | 0.130388 | 16.73 |
| 2633   | 2017 | -0.62 | 0.05 | 0.059264 | 0.00351219 | 20.23405 | 0.010393 | 28.12 |
| 603667 | 2017 | -0.5  | 0.05 | 0.059264 | 0.00351219 | 21.19547 | 0.078988 | 26.46 |
| 2699   | 2017 | -0.21 | 0.05 | 0.059264 | 0.00351219 | 22.24669 | 0.051568 | 37.76 |
| 2011   | 2017 | -0.34 | 0.05 | 0.059264 | 0.00351219 | 23.35298 | 0.018427 | 29.48 |
| 2011   | 2017 | -0.75 | 0.05 | 0.059264 | 0.00351219 | 23.35298 | 0.018427 | 29.48 |
| 600352 | 2017 | 0.59  | 0.05 | 0.059264 | 0.00351219 | 24.55955 | 0.144328 | 11.98 |
| 705    | 2017 | 0.47  | 0.05 | 0.059264 | 0.00351219 | 21.44166 | 0.045303 | 19.94 |
| 2085   | 2017 | -0.29 | 0.05 | 0.059264 | 0.00351219 | 23.03075 | 0.153028 | 45.69 |
| 600261 | 2017 | -0.4  | 0.05 | 0.059264 | 0.00351219 | 22.59457 | 0.11872  | 32.14 |
| 2011   | 2017 | 0.427 | 0.05 | 0.059264 | 0.00351219 | 23.02462 | 0.018427 | 29.48 |
| 2590   | 2017 | -0.56 | 0.05 | 0.059264 | 0.00351219 | 21.97474 | 0.070084 | 45.86 |
| 600526 | 2017 | -0.13 | 0.05 | 0.059264 | 0.00351219 | 22.84318 | -0.08356 | 25.67 |
| 2440   | 2017 | 0.73  | 0.05 | 0.059264 | 0.00351219 | 22.91816 | 0.130388 | 16.73 |
| 300316 | 2017 | 0.129 | 0.05 | 0.059264 | 0.00351219 | 22.49989 | 0.100432 | 48.47 |
| 300316 | 2017 | -0.07 | 0.05 | 0.059264 | 0.00351219 | 22.51772 | 0.100432 | 48.47 |
| 300316 | 2017 | -0.1  | 0.05 | 0.059264 | 0.00351219 | 22.51772 | 0.100432 | 48.47 |
| 2085   | 2017 | -0.36 | 0.05 | 0.059264 | 0.00351219 | 23.03075 | 0.153028 | 45.69 |
| 600352 | 2017 | 0.59  | 0.05 | 0.059264 | 0.00351219 | 23.59404 | 0.144328 | 11.98 |
| 2050   | 2017 | -0.61 | 0.05 | 0.059264 | 0.00351219 | 23.23676 | 0.157835 | 37.18 |
| 2011   | 2017 | -0.53 | 0.05 | 0.059264 | 0.00351219 | 23.35298 | 0.018427 | 29.48 |
| 2006   | 2017 | -0.25 | 0.05 | 0.059264 | 0.00351219 | 21.30115 | 0.09166  | 30.16 |
| 600387 | 2017 | -0.71 | 0.05 | 0.059264 | 0.00351219 | 21.94186 | -0.00609 | 18.49 |
| 600580 | 2017 | -0.01 | 0.05 | 0.059264 | 0.00351219 | 23.54318 | 0.111037 | 32.8  |
| 2440   | 2017 | 0.73  | 0.05 | 0.059264 | 3.51E-03   | 22.91816 | 0.130388 | 16.73 |
| 600059 | 2017 | 0.079 | 0.05 | 0.059264 | 3.51E-03   | 22.25866 | 0.041062 | 41.39 |

|        |      |       |      |          |            |          |          |       |
|--------|------|-------|------|----------|------------|----------|----------|-------|
| 600580 | 2017 | -0.21 | 0.05 | 0.059264 | 3.51E-03   | 23.54318 | 0.111037 | 32.8  |
| 603667 | 2017 | -0.5  | 0.05 | 0.059264 | 3.51E-03   | 21.19547 | 0.078988 | 26.46 |
| 600526 | 2017 | -0.57 | 0.05 | 0.059264 | 3.51E-03   | 22.84318 | -0.08356 | 25.67 |
| 2590   | 2017 | -0.05 | 0.05 | 0.059264 | 3.51E-03   | 21.97474 | 0.070084 | 45.86 |
| 600261 | 2017 | -0.37 | 0.05 | 0.059264 | 3.51E-03   | 22.59457 | 0.11872  | 32.14 |
| 2224   | 2017 | 0.382 | 0.05 | 0.059264 | 3.51E-03   | 21.4041  | 0.092607 | 34.97 |
| 2375   | 2017 | -0.51 | 0.05 | 0.059264 | 0.00351219 | 23.33036 | 0.047548 | 32.77 |
| 601579 | 2017 | -0.88 | 0.05 | 0.059264 | 0.00351219 | 22.04239 | 0.06017  | 32.97 |
| 2574   | 2017 | -0.85 | 0.05 | 0.059264 | 0.00351219 | 22.07975 | 0.027713 | 29.96 |
| 600059 | 2017 | -0.25 | 0.05 | 0.059264 | 0.00351219 | 22.25866 | 0.041062 | 41.39 |
| 600216 | 2017 | 0.794 | 0.05 | 0.059264 | 0.00351219 | 23.00498 | 0.030793 | 22.51 |
| 2001   | 2017 | -0.02 | 0.05 | 0.059264 | 0.00351219 | 23.62374 | 0.122448 | 48.55 |
| 2006   | 2017 | -0.58 | 0.05 | 0.059264 | 0.00351219 | 21.30115 | 0.09166  | 30.16 |
| 600059 | 2017 | 0.079 | 0.05 | 0.059264 | 0.00351219 | 22.25866 | 0.041062 | 41.39 |
| 2203   | 2017 | -0.48 | 0.05 | 0.059264 | 0.00351219 | 23.44981 | 0.130461 | 48.31 |
| 600173 | 2017 | 0.493 | 0.05 | 0.059264 | 0.00351219 | 22.47457 | 0.174145 | 43.32 |
| 600580 | 2017 | 0.264 | 0.05 | 0.059264 | 0.00351219 | 23.54318 | 0.111037 | 32.8  |
| 600580 | 2017 | -0.24 | 0.05 | 0.059264 | 0.00351219 | 23.54318 | 0.111037 | 32.8  |
| 600580 | 2017 | -0.12 | 0.05 | 0.059264 | 0.00351219 | 23.54318 | 0.111037 | 32.8  |
| 600790 | 2017 | -0.58 | 0.05 | 0.059264 | 0.00351219 | 22.58606 | 0.078785 | 35.78 |
| 600580 | 2017 | -0.14 | 0.05 | 0.059264 | 0.00351219 | 23.54318 | 0.111037 | 32.8  |
| 2050   | 2017 | -0.46 | 0.05 | 0.059264 | 0.00351219 | 23.23676 | 0.157835 | 37.18 |
| 600580 | 2017 | -0.07 | 0.05 | 0.059264 | 0.00351219 | 23.54318 | 0.111037 | 32.8  |
| 600070 | 2017 | -0.31 | 0.05 | 0.059264 | 0.00351219 | 22.00554 | 0.087292 | 19.4  |
| 600580 | 2017 | -0.12 | 0.05 | 0.059264 | 0.00351219 | 23.54318 | 0.111037 | 32.8  |
| 2020   | 2017 | 0.665 | 0.05 | 0.059264 | 0.00351219 | 22.31332 | 0.067336 | 20.11 |
| 603667 | 2017 | 0.04  | 0.05 | 0.059264 | 0.00351219 | 21.19547 | 0.078988 | 26.46 |
| 600216 | 2017 | 0.794 | 0.05 | 0.059264 | 0.00351219 | 23.00498 | 0.030793 | 22.51 |
| 300316 | 2017 | -0.2  | 0.05 | 0.059264 | 0.00351219 | 22.51772 | 0.100432 | 48.47 |
| 2203   | 2017 | -0.44 | 0.05 | 0.059264 | 0.00351219 | 23.44981 | 0.130461 | 48.31 |
| 600580 | 2017 | -0.51 | 0.05 | 0.059264 | 0.00351219 | 23.54318 | 0.111037 | 32.8  |
| 600216 | 2017 | 0.617 | 0.05 | 0.059264 | 0.00351219 | 22.90592 | 0.030793 | 22.51 |
| 2085   | 2017 | -0.63 | 0.05 | 0.059264 | 0.00351219 | 23.03075 | 0.153028 | 45.69 |
| 2011   | 2017 | -0.45 | 0.05 | 0.059264 | 0.00351219 | 23.35298 | 0.018427 | 29.48 |
| 600173 | 2017 | 0.493 | 0.05 | 0.059264 | 0.00351219 | 22.10289 | 0.174145 | 43.32 |
| 600059 | 2017 | 0.079 | 0.05 | 0.059264 | 0.00351219 | 22.25866 | 0.041062 | 41.39 |
| 600059 | 2017 | 0.079 | 0.05 | 0.059264 | 0.00351219 | 22.18344 | 0.041062 | 41.39 |
| 600387 | 2017 | 0.619 | 0.05 | 0.059264 | 0.00351219 | 23.01173 | -0.00609 | 18.49 |
| 2375   | 2017 | -0.19 | 0.05 | 0.059264 | 0.00351219 | 23.71579 | 0.047548 | 32.77 |
| 2011   | 2017 | -0.75 | 0.05 | 0.059264 | 0.00351219 | 23.35298 | 0.018427 | 29.48 |
| 600352 | 2017 | 0.266 | 0.05 | 0.059264 | 0.00351219 | 24.55955 | 0.144328 | 11.98 |
| 600352 | 2017 | 0.59  | 0.05 | 0.059264 | 0.00351219 | 24.55955 | 0.144328 | 11.98 |
| 600352 | 2017 | 0.59  | 0.05 | 0.059264 | 0.00351219 | 24.55955 | 0.144328 | 11.98 |
| 600352 | 2017 | 0.59  | 0.05 | 0.059264 | 0.00351219 | 24.55955 | 0.144328 | 11.98 |
| 2440   | 2017 | 0.73  | 0.05 | 0.059264 | 0.00351219 | 22.91816 | 0.130388 | 16.73 |
| 2602   | 2017 | -0.28 | 0.05 | 0.059264 | 0.00351219 | 22.58171 | 0.153941 | 26.58 |
| 600352 | 2017 | 0.59  | 0.05 | 0.059264 | 0.00351219 | 24.55955 | 0.144328 | 11.98 |
| 600580 | 2017 | -0.16 | 0.05 | 0.059264 | 0.00351219 | 23.54318 | 0.111037 | 32.8  |
| 603311 | 2017 | 0.334 | 0.05 | 0.059264 | 0.00351219 | 20.51967 | 0.112374 | 50.7  |
| 2020   | 2017 | 0.621 | 0.05 | 0.059264 | 0.00351219 | 22.31332 | 0.067336 | 20.11 |
| 2617   | 2017 | -0.69 | 0.05 | 0.059264 | 0.00351219 | 22.56477 | 0.123311 | 37.77 |
| 2006   | 2017 | -0.28 | 0.05 | 0.059264 | 0.00351219 | 21.27367 | 0.09166  | 30.16 |
| 2085   | 2017 | -0.63 | 0.05 | 0.059264 | 0.00351219 | 23.03075 | 0.153028 | 45.69 |
| 2758   | 2017 | -0.63 | 0.05 | 0.059264 | 0.00351219 | 20.62542 | 0.068779 | 26.25 |

|        |      |       |      |          |            |          |          |       |
|--------|------|-------|------|----------|------------|----------|----------|-------|
| 2699   | 2017 | 0.307 | 0.05 | 0.059264 | 0.00351219 | 22.24669 | 0.051568 | 37.76 |
| 2375   | 2017 | -0.48 | 0.05 | 0.059264 | 0.00351219 | 23.33036 | 0.047548 | 32.77 |
| 2758   | 2017 | -0.63 | 0.05 | 0.059264 | 0.00351219 | 20.91668 | 0.068779 | 26.25 |
| 600526 | 2017 | 0.75  | 0.05 | 0.059264 | 0.00351219 | 22.84318 | -0.08356 | 25.67 |
| 2050   | 2017 | -0.58 | 0.05 | 0.059264 | 0.00351219 | 23.23676 | 0.157835 | 37.18 |
| 603008 | 2017 | -0.34 | 0.05 | 0.059264 | 0.00351219 | 22.47904 | 0.102863 | 24.57 |
| 2085   | 2017 | -0.4  | 0.05 | 0.059264 | 0.00351219 | 23.03075 | 0.153028 | 45.69 |
| 600261 | 2017 | -0.3  | 0.05 | 0.059264 | 0.00351219 | 22.59457 | 0.11872  | 32.14 |
| 600352 | 2017 | -0.4  | 0.05 | 0.059264 | 0.00351219 | 24.55955 | 0.144328 | 11.98 |
| 600526 | 2017 | -0.57 | 0.05 | 0.059264 | 3.51E-03   | 22.84318 | -0.08356 | 25.67 |
| 300316 | 2017 | 0.054 | 0.05 | 0.059264 | 3.51E-03   | 22.51772 | 0.100432 | 48.47 |
| 603008 | 2017 | -0.7  | 0.05 | 0.059264 | 3.51E-03   | 22.47904 | 0.102863 | 24.57 |
| 2001   | 2017 | 0.859 | 0.05 | 0.059264 | 3.51E-03   | 23.62374 | 0.122448 | 48.55 |
| 2440   | 2017 | -0.59 | 0.05 | 0.059264 | 3.51E-03   | 22.91816 | 0.130388 | 16.73 |
| 2263   | 2017 | 0.732 | 0.05 | 0.059264 | 0.00351219 | 21.92136 | -0.25958 | 28.09 |
| 600580 | 2017 | -0.12 | 0.05 | 0.059264 | 0.00351219 | 23.54318 | 0.111037 | 32.8  |
| 2520   | 2017 | -0.06 | 0.05 | 0.059264 | 0.00351219 | 21.69104 | 0.03364  | 44.78 |
| 2020   | 2017 | 1.062 | 0.05 | 0.059264 | 0.00351219 | 22.31332 | 0.067336 | 20.11 |
| 2224   | 2017 | 0.382 | 0.05 | 0.059264 | 0.00351219 | 21.3407  | 0.092607 | 34.97 |
| 600352 | 2017 | 0.59  | 0.05 | 0.059264 | 0.00351219 | 24.55955 | 0.144328 | 11.98 |
| 2633   | 2017 | -0.62 | 0.05 | 0.059264 | 0.00351219 | 20.23405 | 0.010393 | 28.12 |
| 600070 | 2017 | -0.09 | 0.05 | 0.059264 | 0.00351219 | 22.00554 | 0.087292 | 19.4  |
| 603008 | 2017 | -0.7  | 0.05 | 0.059264 | 0.00351219 | 22.47904 | 0.102863 | 24.57 |
| 2011   | 2017 | -0.36 | 0.05 | 0.059264 | 0.00351219 | 23.35298 | 0.018427 | 29.48 |
| 2020   | 2017 | -0.26 | 0.05 | 0.059264 | 0.00351219 | 22.31332 | 0.067336 | 20.11 |
| 600261 | 2017 | -0.18 | 0.05 | 0.059264 | 0.00351219 | 22.59457 | 0.11872  | 32.14 |
| 600526 | 2017 | -0.13 | 0.05 | 0.059264 | 0.00351219 | 22.84318 | -0.08356 | 25.67 |
| 600261 | 2017 | -0.28 | 0.05 | 0.059264 | 0.00351219 | 22.10845 | 0.11872  | 32.14 |
| 600261 | 2017 | -0.18 | 0.05 | 0.059264 | 0.00351219 | 22.59457 | 0.11872  | 32.14 |
| 603667 | 2017 | -0.36 | 0.05 | 0.059264 | 0.00351219 | 21.19547 | 0.078988 | 26.46 |
| 600059 | 2017 | 0.41  | 0.05 | 0.059264 | 0.00351219 | 22.25866 | 0.041062 | 41.39 |
| 2050   | 2017 | -0.37 | 0.05 | 0.059264 | 0.00351219 | 22.7764  | 0.157835 | 37.18 |
| 2011   | 2017 | -0.75 | 0.05 | 0.059264 | 0.00351219 | 23.35298 | 0.018427 | 29.48 |
| 600070 | 2017 | 0.575 | 0.05 | 0.059264 | 0.00351219 | 22.00554 | 0.087292 | 19.4  |
| 2574   | 2017 | -0.85 | 0.05 | 0.059264 | 0.00351219 | 22.07975 | 0.027713 | 29.96 |
| 600580 | 2017 | -0.07 | 0.05 | 0.059264 | 0.00351219 | 23.54318 | 0.111037 | 32.8  |
| 2617   | 2017 | -0.69 | 0.05 | 0.059264 | 0.00351219 | 22.56477 | 0.123311 | 37.77 |
| 600387 | 2017 | 0.619 | 0.05 | 0.059264 | 0.00351219 | 23.01173 | -0.00609 | 18.49 |
| 2001   | 2017 | 0.859 | 0.05 | 0.059264 | 0.00351219 | 23.62374 | 0.122448 | 48.55 |
| 601579 | 2017 | -0.65 | 0.05 | 0.059264 | 0.00351219 | 22.10844 | 0.06017  | 32.97 |
| 600526 | 2017 | -0.19 | 0.05 | 0.059264 | 0.00351219 | 22.84318 | -0.08356 | 25.67 |
| 2590   | 2017 | -0.41 | 0.05 | 0.059264 | 0.00351219 | 21.97474 | 0.070084 | 45.86 |
| 2050   | 2017 | -0.47 | 0.05 | 0.059264 | 0.00351219 | 23.23676 | 0.157835 | 37.18 |
| 600216 | 2017 | 0.794 | 0.05 | 0.059264 | 0.00351219 | 23.00498 | 0.030793 | 22.51 |
| 600261 | 2017 | -0.4  | 0.05 | 0.059264 | 0.00351219 | 22.59457 | 0.11872  | 32.14 |
| 2001   | 2017 | 0.802 | 0.05 | 0.059264 | 0.00351219 | 23.62374 | 0.122448 | 48.55 |
| 600059 | 2017 | 0.079 | 0.05 | 0.059264 | 0.00351219 | 22.25866 | 0.041062 | 41.39 |
| 601579 | 2017 | -0.88 | 0.05 | 0.059264 | 0.00351219 | 22.10844 | 0.06017  | 32.97 |
| 600387 | 2017 | -0.24 | 0.05 | 0.059264 | 3.51E-03   | 23.01173 | -0.00609 | 18.49 |
| 2001   | 2017 | 0.72  | 0.05 | 0.059264 | 3.51E-03   | 23.62374 | 0.122448 | 48.55 |
| 601579 | 2017 | -0.52 | 0.05 | 0.059264 | 3.51E-03   | 22.10844 | 0.06017  | 32.97 |
| 2085   | 2017 | -0.63 | 0.05 | 0.059264 | 3.51E-03   | 23.03075 | 0.153028 | 45.69 |
| 2590   | 2017 | -0.29 | 0.05 | 0.059264 | 3.51E-03   | 21.67036 | 0.070084 | 45.86 |
| 2574   | 2017 | -0.85 | 0.05 | 0.059264 | 3.51E-03   | 22.07342 | 0.027713 | 29.96 |

|        |      |       |      |          |            |          |          |       |
|--------|------|-------|------|----------|------------|----------|----------|-------|
| 2590   | 2017 | -0.68 | 0.05 | 0.059264 | 3.51E-03   | 21.97474 | 0.070084 | 45.86 |
| 600070 | 2017 | 0.575 | 0.05 | 0.059264 | 3.51E-03   | 21.65404 | 0.087292 | 19.4  |
| 2602   | 2017 | -0.28 | 0.05 | 0.059264 | 3.51E-03   | 22.58171 | 0.153941 | 26.58 |
| 2001   | 2017 | 0.859 | 0.05 | 0.059264 | 3.51E-03   | 23.62374 | 0.122448 | 48.55 |
| 300316 | 2017 | 0.054 | 0.05 | 0.059264 | 3.51E-03   | 22.51772 | 0.100432 | 48.47 |
| 2263   | 2017 | 0.732 | 0.05 | 0.059264 | 3.51E-03   | 21.92136 | -0.25958 | 28.09 |
| 2617   | 2017 | 0.101 | 0.05 | 0.059264 | 3.51E-03   | 22.56477 | 0.123311 | 37.77 |
| 2203   | 2017 | -0.16 | 0.05 | 0.059264 | 3.51E-03   | 23.44981 | 0.130461 | 48.31 |
| 300316 | 2017 | -0.2  | 0.05 | 0.059264 | 3.51E-03   | 22.51772 | 0.100432 | 48.47 |
| 705    | 2017 | 0.47  | 0.05 | 0.059264 | 3.51E-03   | 21.23926 | 0.045303 | 19.94 |
| 2633   | 2017 | -0.62 | 0.05 | 0.059264 | 3.51E-03   | 20.25047 | 0.010393 | 28.12 |
| 2590   | 2017 | -0.39 | 0.05 | 0.059264 | 3.51E-03   | 21.97474 | 0.070084 | 45.86 |
| 603311 | 2017 | 0.334 | 0.05 | 0.059264 | 0.00351219 | 20.61799 | 0.112374 | 50.7  |
| 600526 | 2017 | 0.75  | 0.05 | 0.059264 | 0.00351219 | 22.84318 | -0.08356 | 25.67 |
| 600526 | 2017 | -0.57 | 0.05 | 0.059264 | 0.00351219 | 22.84318 | -0.08356 | 25.67 |
| 2011   | 2017 | -0.75 | 0.05 | 0.059264 | 0.00351219 | 23.35298 | 0.018427 | 29.48 |
| 600352 | 2017 | 0.59  | 0.05 | 0.059264 | 0.00351219 | 24.55955 | 0.144328 | 11.98 |
| 600580 | 2017 | -0.34 | 0.05 | 0.059264 | 0.00351219 | 23.54318 | 0.111037 | 32.8  |
| 2699   | 2017 | -0.36 | 0.05 | 0.059264 | 0.00351219 | 22.24669 | 0.051568 | 37.76 |
| 2375   | 2017 | -0.64 | 0.05 | 0.059264 | 0.00351219 | 23.33036 | 0.047548 | 32.77 |
| 2699   | 2017 | -0.36 | 0.05 | 0.059264 | 0.00351219 | 22.24669 | 0.051568 | 37.76 |
| 2520   | 2017 | -0.06 | 0.05 | 0.059264 | 0.00351219 | 21.69104 | 0.03364  | 44.78 |
| 2602   | 2017 | -0.28 | 0.05 | 0.059264 | 0.00351219 | 22.58171 | 0.153941 | 26.58 |
| 2758   | 2017 | -0.63 | 0.05 | 0.059264 | 0.00351219 | 20.91668 | 0.068779 | 26.25 |
| 600352 | 2017 | 0.59  | 0.05 | 0.059264 | 0.00351219 | 24.55955 | 0.144328 | 11.98 |
| 600352 | 2017 | 0.59  | 0.05 | 0.059264 | 0.00351219 | 24.55955 | 0.144328 | 11.98 |
| 600261 | 2017 | -0.35 | 0.05 | 0.059264 | 0.00351219 | 22.59457 | 0.11872  | 32.14 |
| 2375   | 2017 | 0.004 | 0.05 | 0.059264 | 0.00351219 | 23.33036 | 0.047548 | 32.77 |
| 2085   | 2017 | 0.037 | 0.05 | 0.059264 | 0.00351219 | 23.03075 | 0.153028 | 45.69 |
| 2050   | 2017 | 0.049 | 0.05 | 0.059264 | 0.00351219 | 23.23676 | 0.157835 | 37.18 |
| 2085   | 2017 | -0.42 | 0.05 | 0.059264 | 0.00351219 | 23.03075 | 0.153028 | 45.69 |
| 2602   | 2017 | -0.28 | 0.05 | 0.059264 | 0.00351219 | 22.58171 | 0.153941 | 26.58 |
| 2085   | 2017 | -0.46 | 0.05 | 0.059264 | 0.00351219 | 23.03075 | 0.153028 | 45.69 |
| 600352 | 2017 | 0.59  | 0.05 | 0.059264 | 0.00351219 | 24.55955 | 0.144328 | 11.98 |
| 2224   | 2017 | 0.382 | 0.05 | 0.059264 | 0.00351219 | 21.4041  | 0.092607 | 34.97 |
| 2020   | 2017 | 0.495 | 0.05 | 0.059264 | 0.00351219 | 22.20105 | 0.067336 | 20.11 |
| 2085   | 2017 | -0.41 | 0.05 | 0.059264 | 0.00351219 | 22.45095 | 0.153028 | 45.69 |
| 600352 | 2017 | 0.59  | 0.05 | 0.059264 | 0.00351219 | 24.55955 | 0.144328 | 11.98 |
| 2085   | 2017 | -0.63 | 0.05 | 0.059264 | 0.00351219 | 23.03075 | 0.153028 | 45.69 |
| 2006   | 2017 | -0.42 | 0.05 | 0.059264 | 0.00351219 | 21.30115 | 0.09166  | 30.16 |
| 2263   | 2017 | 0.732 | 0.05 | 0.059264 | 0.00351219 | 21.89161 | -0.25958 | 28.09 |
| 705    | 2017 | 0.47  | 0.05 | 0.059264 | 0.00351219 | 21.44166 | 0.045303 | 19.94 |
| 2001   | 2017 | 0.751 | 0.05 | 0.059264 | 0.00351219 | 23.62374 | 0.122448 | 48.55 |
| 2375   | 2017 | 0.004 | 0.05 | 0.059264 | 0.00351219 | 23.33036 | 0.047548 | 32.77 |
| 2001   | 2017 | 0.859 | 0.05 | 0.059264 | 0.00351219 | 23.62374 | 0.122448 | 48.55 |
| 600580 | 2017 | -0.12 | 0.05 | 0.059264 | 0.00351219 | 23.05135 | 0.111037 | 32.8  |
| 600070 | 2017 | -0.75 | 0.05 | 0.059264 | 0.00351219 | 22.00554 | 0.087292 | 19.4  |
| 2375   | 2017 | -0.37 | 0.05 | 0.059264 | 0.00351219 | 23.71579 | 0.047548 | 32.77 |
| 600059 | 2017 | 0.079 | 0.05 | 0.059264 | 0.00351219 | 22.25866 | 0.041062 | 41.39 |
| 2699   | 2017 | -0.36 | 0.05 | 0.059264 | 0.00351219 | 22.24669 | 0.051568 | 37.76 |
| 600387 | 2017 | -0.71 | 0.05 | 0.059264 | 0.00351219 | 23.01173 | -0.00609 | 18.49 |
| 600526 | 2017 | 0.75  | 0.05 | 0.059264 | 0.00351219 | 22.84318 | -0.08356 | 25.67 |
| 2617   | 2017 | -0.53 | 0.05 | 0.059264 | 0.00351219 | 22.56477 | 0.123311 | 37.77 |
| 2590   | 2017 | 0.648 | 0.05 | 0.059264 | 0.00351219 | 21.97474 | 0.070084 | 45.86 |

|        |      |       |      |          |            |          |          |       |
|--------|------|-------|------|----------|------------|----------|----------|-------|
| 2011   | 2017 | -0.75 | 0.05 | 0.059264 | 0.00351219 | 23.35298 | 0.018427 | 29.48 |
| 2011   | 2017 | -0.75 | 0.05 | 0.059264 | 0.00351219 | 23.35298 | 0.018427 | 29.48 |
| 2602   | 2017 | -0.28 | 0.05 | 0.059264 | 0.00351219 | 22.58171 | 0.153941 | 26.58 |
| 2050   | 2017 | -0.61 | 0.05 | 0.059264 | 0.00351219 | 23.23676 | 0.157835 | 37.18 |
| 2699   | 2017 | -0.36 | 0.05 | 0.059264 | 0.00351219 | 22.22859 | 0.051568 | 37.76 |
| 2440   | 2017 | -0.09 | 0.05 | 0.059264 | 0.00351219 | 22.91816 | 0.130388 | 16.73 |
| 2011   | 2017 | 0.133 | 0.05 | 0.059264 | 0.00351219 | 23.35298 | 0.018427 | 29.48 |
| 300411 | 2017 | 0.083 | 0.05 | 0.059264 | 0.00351219 | 22.06346 | 0.020728 | 19.72 |
| 2224   | 2017 | 0.382 | 0.05 | 0.059264 | 0.00351219 | 21.4041  | 0.092607 | 34.97 |
| 2050   | 2017 | -0.32 | 0.05 | 0.059264 | 0.00351219 | 23.23676 | 0.157835 | 37.18 |
| 2050   | 2017 | -0.58 | 0.05 | 0.059264 | 0.00351219 | 23.23676 | 0.157835 | 37.18 |
| 2263   | 2017 | 0.732 | 0.05 | 0.059264 | 0.00351219 | 21.92136 | -0.25958 | 28.09 |
| 2203   | 2017 | -0.48 | 0.05 | 0.059264 | 0.00351219 | 23.03863 | 0.130461 | 48.31 |
| 603667 | 2017 | -0.36 | 0.05 | 0.059264 | 0.00351219 | 21.25977 | 0.078988 | 26.46 |
| 2011   | 2017 | -0.31 | 0.05 | 0.059264 | 0.00351219 | 23.35298 | 0.018427 | 29.48 |
| 2263   | 2017 | 0.732 | 0.05 | 0.059264 | 0.00351219 | 21.92136 | -0.25958 | 28.09 |
| 603008 | 2017 | -0.7  | 0.05 | 0.059264 | 0.00351219 | 22.47904 | 0.102863 | 24.57 |
| 600216 | 2017 | 0.794 | 0.05 | 0.059264 | 0.00351219 | 23.00498 | 0.030793 | 22.51 |
| 2520   | 2017 | 0.177 | 0.05 | 0.059264 | 0.00351219 | 21.69104 | 0.03364  | 44.78 |
| 600070 | 2017 | 0.575 | 0.05 | 0.059264 | 0.00351219 | 22.00554 | 0.087292 | 19.4  |
| 2617   | 2017 | -0.53 | 0.05 | 0.059264 | 0.00351219 | 22.56477 | 0.123311 | 37.77 |
| 600059 | 2017 | 0.079 | 0.05 | 0.059264 | 0.00351219 | 22.25866 | 0.041062 | 41.39 |
| 600352 | 2017 | 0.59  | 0.05 | 0.059264 | 0.00351219 | 24.55955 | 0.144328 | 11.98 |
| 2440   | 2017 | 0.73  | 0.05 | 0.059264 | 0.00351219 | 22.91816 | 0.130388 | 16.73 |
| 2011   | 2017 | 0.122 | 0.05 | 0.059264 | 0.00351219 | 23.35298 | 0.018427 | 29.48 |
| 2050   | 2017 | -0.52 | 0.05 | 0.059264 | 0.00351219 | 23.23676 | 0.157835 | 37.18 |
| 2203   | 2017 | -0.46 | 0.05 | 0.059264 | 0.00351219 | 23.44981 | 0.130461 | 48.31 |
| 600790 | 2017 | -0.47 | 0.05 | 0.059264 | 0.00351219 | 22.89091 | 0.078785 | 35.78 |
| 2085   | 2017 | -0.63 | 0.05 | 0.059264 | 0.00351219 | 23.03075 | 0.153028 | 45.69 |
| 601579 | 2017 | -0.52 | 0.05 | 0.059264 | 0.00351219 | 22.10844 | 0.06017  | 32.97 |
| 300411 | 2017 | 0.091 | 0.05 | 0.059264 | 0.00351219 | 22.06346 | 0.020728 | 19.72 |
| 2050   | 2017 | -0.02 | 0.05 | 0.059264 | 0.00351219 | 23.23676 | 0.157835 | 37.18 |
| 603008 | 2017 | -0.78 | 0.05 | 0.059264 | 0.00351219 | 22.47904 | 0.102863 | 24.57 |
| 2011   | 2017 | -0.75 | 0.05 | 0.059264 | 0.00351219 | 23.35298 | 0.018427 | 29.48 |
| 2001   | 2017 | 0.859 | 0.05 | 0.059264 | 0.00351219 | 23.62374 | 0.122448 | 48.55 |
| 2574   | 2017 | -0.85 | 0.05 | 0.059264 | 0.00351219 | 22.07975 | 0.027713 | 29.96 |
| 2440   | 2017 | 0.73  | 0.05 | 0.059264 | 0.00351219 | 22.44457 | 0.130388 | 16.73 |
| 2020   | 2017 | 1.062 | 0.05 | 0.059264 | 0.00351219 | 22.31332 | 0.067336 | 20.11 |
| 600526 | 2017 | 0.75  | 0.05 | 0.059264 | 0.00351219 | 22.84318 | -0.08356 | 25.67 |
| 2440   | 2017 | 0.73  | 0.05 | 0.059264 | 0.00351219 | 22.91816 | 0.130388 | 16.73 |
| 2203   | 2017 | -0.48 | 0.05 | 0.059264 | 0.00351219 | 23.44981 | 0.130461 | 48.31 |
| 2203   | 2017 | -0.29 | 0.05 | 0.059264 | 0.00351219 | 23.44981 | 0.130461 | 48.31 |
| 2203   | 2017 | -0.48 | 0.05 | 0.059264 | 0.00351219 | 23.44981 | 0.130461 | 48.31 |
| 2440   | 2017 | 0.73  | 0.05 | 0.059264 | 0.00351219 | 22.91816 | 0.130388 | 16.73 |
| 2001   | 2017 | 0.802 | 0.05 | 0.059264 | 0.00351219 | 23.62374 | 0.122448 | 48.55 |
| 603703 | 2017 | -0.35 | 0.05 | 0.059264 | 0.00351219 | 20.79926 | 0.045457 | 33.32 |
| 300316 | 2017 | 0.46  | 0.05 | 0.059264 | 0.00351219 | 22.51772 | 0.100432 | 48.47 |
| 2617   | 2017 | -0.69 | 0.05 | 0.059264 | 0.00351219 | 22.56477 | 0.123311 | 37.77 |
| 2617   | 2017 | -0.69 | 0.05 | 0.059264 | 0.00351219 | 22.25934 | 0.123311 | 37.77 |
| 2011   | 2017 | -0.75 | 0.05 | 0.059264 | 0.00351219 | 23.35298 | 0.018427 | 29.48 |
| 2699   | 2017 | -0.21 | 0.05 | 0.059264 | 0.00351219 | 22.24669 | 0.051568 | 37.76 |
| 603008 | 2017 | -0.34 | 0.05 | 0.059264 | 0.00351219 | 22.3032  | 0.102863 | 24.57 |
| 603008 | 2017 | -0.78 | 0.05 | 0.059264 | 0.00351219 | 22.47904 | 0.102863 | 24.57 |
| 2203   | 2017 | -0.48 | 0.05 | 0.059264 | 0.00351219 | 23.44981 | 0.130461 | 48.31 |

|        |      |       |      |          |            |          |          |       |
|--------|------|-------|------|----------|------------|----------|----------|-------|
| 300411 | 2017 | 0.091 | 0.05 | 0.059264 | 0.00351219 | 22.06346 | 0.020728 | 19.72 |
| 600580 | 2017 | -0.17 | 0.05 | 0.059264 | 0.00351219 | 23.54318 | 0.111037 | 32.8  |
| 2050   | 2017 | -0.39 | 0.05 | 0.059264 | 0.00351219 | 23.23676 | 0.157835 | 37.18 |
| 2440   | 2017 | 0.73  | 0.05 | 0.059264 | 0.00351219 | 22.91816 | 0.130388 | 16.73 |
| 2011   | 2017 | -0.7  | 0.05 | 0.059264 | 0.00351219 | 23.35298 | 0.018427 | 29.48 |
| 603008 | 2017 | -0.78 | 0.05 | 0.059264 | 0.00351219 | 22.47904 | 0.102863 | 24.57 |
| 600352 | 2017 | 0.59  | 0.05 | 0.059264 | 0.00351219 | 24.55955 | 0.144328 | 11.98 |
| 300411 | 2017 | 0.083 | 0.05 | 0.059264 | 0.00351219 | 22.06346 | 0.020728 | 19.72 |
| 2011   | 2017 | -0.31 | 0.05 | 0.059264 | 0.00351219 | 23.35298 | 0.018427 | 29.48 |
| 2020   | 2017 | 1.062 | 0.05 | 0.059264 | 0.00351219 | 22.31332 | 0.067336 | 20.11 |
| 2011   | 2017 | -0.75 | 0.05 | 0.059264 | 0.00351219 | 23.35298 | 0.018427 | 29.48 |
| 2050   | 2017 | 0.143 | 0.05 | 0.059264 | 0.00351219 | 23.23676 | 0.157835 | 37.18 |
| 2440   | 2017 | -0.59 | 0.05 | 0.059264 | 0.00351219 | 22.91816 | 0.130388 | 16.73 |
| 2440   | 2017 | 0.73  | 0.05 | 0.059264 | 0.00351219 | 22.91816 | 0.130388 | 16.73 |
| 600790 | 2017 | -0.25 | 0.05 | 0.059264 | 0.00351219 | 22.89091 | 0.078785 | 35.78 |
| 2440   | 2017 | 0.73  | 0.05 | 0.059264 | 0.00351219 | 22.91816 | 0.130388 | 16.73 |
| 2011   | 2017 | -0.75 | 0.05 | 0.059264 | 0.00351219 | 23.35298 | 0.018427 | 29.48 |
| 2001   | 2017 | 0.859 | 0.05 | 0.059264 | 0.00351219 | 23.62374 | 0.122448 | 48.55 |
| 600580 | 2017 | -0.07 | 0.05 | 0.059264 | 0.00351219 | 23.54318 | 0.111037 | 32.8  |
| 603667 | 2017 | 0.04  | 0.05 | 0.059264 | 0.00351219 | 21.19547 | 0.078988 | 26.46 |
| 2011   | 2017 | -0.75 | 0.05 | 0.059264 | 0.00351219 | 23.35298 | 0.018427 | 29.48 |
| 2011   | 2017 | -0.49 | 0.05 | 0.059264 | 0.00351219 | 23.35298 | 0.018427 | 29.48 |
| 2006   | 2017 | -0.25 | 0.05 | 0.059264 | 0.00351219 | 21.30115 | 0.09166  | 30.16 |
| 2375   | 2017 | -0.16 | 0.05 | 0.059264 | 0.00351219 | 23.33036 | 0.047548 | 32.77 |
| 2375   | 2017 | -0.64 | 0.05 | 0.059264 | 0.00351219 | 23.33036 | 0.047548 | 32.77 |
| 603008 | 2017 | -0.45 | 0.05 | 0.059264 | 0.00351219 | 22.47904 | 0.102863 | 24.57 |
| 2375   | 2017 | -0.48 | 0.05 | 0.059264 | 0.00351219 | 23.33036 | 0.047548 | 32.77 |
| 600526 | 2017 | 0.75  | 0.05 | 0.059264 | 0.00351219 | 22.69862 | -0.08356 | 25.67 |
| 2011   | 2017 | -0.75 | 0.05 | 0.059264 | 0.00351219 | 23.35298 | 0.018427 | 29.48 |
| 2001   | 2017 | 0.859 | 0.05 | 0.059264 | 0.00351219 | 23.28616 | 0.122448 | 48.55 |
| 600261 | 2017 | -0.62 | 0.05 | 0.059264 | 0.00351219 | 22.59457 | 0.11872  | 32.14 |
| 600526 | 2017 | 0.75  | 0.05 | 0.059264 | 0.00351219 | 22.84318 | -0.08356 | 25.67 |
| 2011   | 2017 | -0.55 | 0.05 | 0.059264 | 0.00351219 | 23.35298 | 0.018427 | 29.48 |
| 2020   | 2017 | 1.062 | 0.05 | 0.059264 | 0.00351219 | 22.31332 | 0.067336 | 20.11 |
| 2617   | 2017 | -0.69 | 0.05 | 0.059264 | 0.00351219 | 22.56477 | 0.123311 | 37.77 |
| 600352 | 2017 | 0.59  | 0.05 | 0.059264 | 0.00351219 | 24.55955 | 0.144328 | 11.98 |
| 2011   | 2017 | -0.75 | 0.05 | 0.059264 | 0.00351219 | 23.35298 | 0.018427 | 29.48 |
| 2224   | 2017 | 0.382 | 0.05 | 0.059264 | 0.00351219 | 21.4041  | 0.092607 | 34.97 |
| 2590   | 2017 | -0.39 | 0.05 | 0.059264 | 0.00351219 | 21.97474 | 0.070084 | 45.86 |
| 2375   | 2017 | -0.64 | 0.05 | 0.059264 | 0.00351219 | 23.33036 | 0.047548 | 32.77 |
| 600580 | 2017 | 0.154 | 0.05 | 0.059264 | 0.00351219 | 23.54318 | 0.111037 | 32.8  |
| 2011   | 2017 | -0.45 | 0.05 | 0.059264 | 0.00351219 | 23.35298 | 0.018427 | 29.48 |
| 600580 | 2017 | -0.33 | 0.05 | 0.059264 | 0.00351219 | 23.54318 | 0.111037 | 32.8  |
| 2020   | 2017 | 1.062 | 0.05 | 0.059264 | 0.00351219 | 22.31332 | 0.067336 | 20.11 |
| 600261 | 2017 | -0.22 | 0.05 | 0.059264 | 0.00351219 | 22.59457 | 0.11872  | 32.14 |
| 2006   | 2017 | -0.44 | 0.05 | 0.059264 | 0.00351219 | 21.30115 | 0.09166  | 30.16 |
| 600173 | 2017 | 0.493 | 0.05 | 0.059264 | 0.00351219 | 22.47457 | 0.174145 | 43.32 |
| 603008 | 2017 | -0.78 | 0.05 | 0.059264 | 0.00351219 | 22.47904 | 0.102863 | 24.57 |
| 2085   | 2017 | -0.46 | 0.05 | 0.059264 | 0.00351219 | 23.03075 | 0.153028 | 45.69 |
| 2224   | 2017 | 0.382 | 0.05 | 0.059264 | 0.00351219 | 21.4041  | 0.092607 | 34.97 |
| 2590   | 2017 | -0.16 | 0.05 | 0.059264 | 0.00351219 | 21.97474 | 0.070084 | 45.86 |
| 2011   | 2017 | -0.75 | 0.05 | 0.059264 | 0.00351219 | 23.35298 | 0.018427 | 29.48 |
| 300316 | 2017 | 0.015 | 0.05 | 0.059264 | 0.00351219 | 22.51772 | 0.100432 | 48.47 |
| 600352 | 2017 | 0.59  | 0.05 | 0.059264 | 0.00351219 | 24.55955 | 0.144328 | 11.98 |

|        |      |       |      |          |            |          |          |       |
|--------|------|-------|------|----------|------------|----------|----------|-------|
| 2574   | 2017 | -0.85 | 0.05 | 0.059264 | 0.00351219 | 22.07975 | 0.027713 | 29.96 |
| 600070 | 2017 | -0.31 | 0.05 | 0.059264 | 0.00351219 | 22.00554 | 0.087292 | 19.4  |
| 2602   | 2017 | -0.28 | 0.05 | 0.059264 | 0.00351219 | 21.86944 | 0.153941 | 26.58 |
| 600070 | 2017 | -0.55 | 0.05 | 0.059264 | 0.00351219 | 22.00554 | 0.087292 | 19.4  |
| 300411 | 2017 | 0.051 | 0.05 | 0.059264 | 0.00351219 | 22.06346 | 0.020728 | 19.72 |
| 2006   | 2017 | -0.22 | 0.05 | 0.059264 | 0.00351219 | 21.30115 | 0.09166  | 30.16 |
| 600580 | 2017 | -0.12 | 0.05 | 0.059264 | 0.00351219 | 23.54318 | 0.111037 | 32.8  |
| 2617   | 2017 | -0.69 | 0.05 | 0.059264 | 0.00351219 | 22.56477 | 0.123311 | 37.77 |
| 2440   | 2017 | 0.73  | 0.05 | 0.059264 | 0.00351219 | 22.91816 | 0.130388 | 16.73 |
| 2085   | 2017 | -0.63 | 0.05 | 0.059264 | 0.00351219 | 23.03075 | 0.153028 | 45.69 |
| 600526 | 2017 | 0.75  | 0.05 | 0.059264 | 0.00351219 | 22.84318 | -0.08356 | 25.67 |
| 2590   | 2017 | -0.39 | 0.05 | 0.059264 | 0.00351219 | 21.97474 | 0.070084 | 45.86 |
| 601579 | 2017 | -0.52 | 0.05 | 0.059264 | 0.00351219 | 22.10844 | 0.06017  | 32.97 |
| 603008 | 2017 | -0.6  | 0.05 | 0.059264 | 0.00351219 | 22.47904 | 0.102863 | 24.57 |
| 2203   | 2017 | -0.69 | 0.05 | 0.059264 | 0.00351219 | 23.44981 | 0.130461 | 48.31 |
| 2520   | 2017 | -0.06 | 0.05 | 0.059264 | 0.00351219 | 21.69104 | 0.03364  | 44.78 |
| 600216 | 2017 | 0.654 | 0.05 | 0.059264 | 0.00351219 | 23.00498 | 0.030793 | 22.51 |
| 2263   | 2017 | 0.732 | 0.05 | 0.059264 | 0.00351219 | 21.92136 | -0.25958 | 28.09 |
| 2011   | 2017 | -0.75 | 0.05 | 0.059264 | 0.00351219 | 23.35298 | 0.018427 | 29.48 |
| 2590   | 2017 | -0.19 | 0.05 | 0.059264 | 0.00351219 | 21.97474 | 0.070084 | 45.86 |
| 603311 | 2017 | 0.334 | 0.05 | 0.059264 | 0.00351219 | 20.61799 | 0.112374 | 50.7  |
| 2050   | 2017 | -0.02 | 0.05 | 0.059264 | 0.00351219 | 23.23676 | 0.157835 | 37.18 |
| 300411 | 2017 | 0.051 | 0.05 | 0.059264 | 0.00351219 | 22.01847 | 0.020728 | 19.72 |
| 2011   | 2017 | -0.75 | 0.05 | 0.059264 | 0.00351219 | 23.35298 | 0.018427 | 29.48 |
| 601208 | 2017 | 0.827 | 0.01 | 0.06535  | 0.00427067 | 21.60347 | 0.044836 | 22.94 |
| 600839 | 2017 | -0.68 | 0.01 | 0.06535  | 0.00427067 | 24.90414 | 0.031709 | 23.22 |
| 600839 | 2017 | -0.75 | 0.01 | 0.06535  | 0.00427067 | 24.90414 | 0.031709 | 23.22 |
| 801    | 2017 | 0.488 | 0.01 | 0.06535  | 0.00427067 | 22.33182 | 0.000344 | 47.61 |
| 2258   | 2017 | 0.521 | 0.01 | 0.06535  | 0.00427067 | 22.23057 | 0.157415 | 27.36 |
| 876    | 2017 | 0.008 | 0.01 | 0.06535  | 0.00427067 | 24.47163 | 0.111768 | 29.08 |
| 2258   | 2017 | 0.566 | 0.01 | 0.06535  | 0.00427067 | 21.89458 | 0.157415 | 27.36 |
| 300432 | 2017 | -0.23 | 0.01 | 0.06535  | 0.00427067 | 22.4295  | 0.092115 | 27.78 |
| 600839 | 2017 | -0.75 | 0.01 | 0.06535  | 0.00427067 | 24.90414 | 0.031709 | 23.22 |
| 876    | 2017 | 0.34  | 0.01 | 0.06535  | 0.00427067 | 24.47163 | 0.111768 | 29.08 |
| 600839 | 2017 | -0.75 | 0.01 | 0.06535  | 0.00427067 | 24.90414 | 0.031709 | 23.22 |
| 2258   | 2017 | 0.642 | 0.01 | 0.06535  | 0.00427067 | 22.23057 | 0.157415 | 27.36 |
| 601208 | 2017 | 0.827 | 0.01 | 0.06535  | 0.00427067 | 21.82665 | 0.044836 | 22.94 |
| 600839 | 2017 | -0.52 | 0.01 | 0.06535  | 0.00427067 | 24.90414 | 0.031709 | 23.22 |
| 600839 | 2017 | -0.56 | 0.01 | 0.06535  | 0.00427067 | 24.90414 | 0.031709 | 23.22 |
| 600839 | 2017 | -0.16 | 0.01 | 0.06535  | 0.00427067 | 24.90414 | 0.031709 | 23.22 |
| 300432 | 2017 | 0.34  | 0.01 | 0.06535  | 0.00427067 | 22.4295  | 0.092115 | 27.78 |
| 876    | 2017 | -0.31 | 0.01 | 0.06535  | 0.00427067 | 24.47163 | 0.111768 | 29.08 |
| 601208 | 2017 | 0.716 | 0.01 | 0.06535  | 0.00427067 | 21.82665 | 0.044836 | 22.94 |
| 801    | 2017 | 0.467 | 0.01 | 0.06535  | 0.00427067 | 22.33182 | 0.000344 | 47.61 |
| 801    | 2017 | 0.507 | 0.01 | 0.06535  | 0.00427067 | 22.33182 | 0.000344 | 47.61 |
| 601208 | 2017 | 0.827 | 0.01 | 0.06535  | 0.00427067 | 21.82665 | 0.044836 | 22.94 |
| 801    | 2017 | -0.34 | 0.01 | 0.06535  | 0.00427067 | 22.33182 | 0.000344 | 47.61 |
| 600839 | 2017 | -0.19 | 0.01 | 0.06535  | 0.00427067 | 24.90414 | 0.031709 | 23.22 |
| 600839 | 2017 | -0.41 | 0.01 | 0.06535  | 0.00427067 | 24.90414 | 0.031709 | 23.22 |
| 600839 | 2017 | -0.52 | 0.01 | 0.06535  | 0.00427067 | 24.90414 | 0.031709 | 23.22 |
| 876    | 2017 | 0.085 | 0.01 | 0.06535  | 0.00427067 | 24.47163 | 0.111768 | 29.08 |
| 2258   | 2017 | 0.642 | 0.01 | 0.06535  | 0.00427067 | 22.23057 | 0.157415 | 27.36 |
| 801    | 2017 | -0.34 | 0.01 | 0.06535  | 0.00427067 | 22.33182 | 0.000344 | 47.61 |
| 801    | 2017 | -0.34 | 0.01 | 0.06535  | 0.00427067 | 22.33182 | 0.000344 | 47.61 |

|        |      |       |      |         |            |          |          |       |
|--------|------|-------|------|---------|------------|----------|----------|-------|
| 2258   | 2017 | 0.642 | 0.01 | 0.06535 | 0.00427067 | 22.23057 | 0.157415 | 27.36 |
| 300432 | 2017 | 0.672 | 0.01 | 0.06535 | 0.00427067 | 22.4295  | 0.092115 | 27.78 |
| 600839 | 2017 | 0.579 | 0.01 | 0.06535 | 0.00427067 | 24.90414 | 0.031709 | 23.22 |
| 600839 | 2017 | -0.75 | 0.01 | 0.06535 | 0.00427067 | 24.90414 | 0.031709 | 23.22 |
| 600839 | 2017 | -0.45 | 0.01 | 0.06535 | 0.00427067 | 24.90414 | 0.031709 | 23.22 |
| 600839 | 2017 | 0.579 | 0.01 | 0.06535 | 0.00427067 | 24.90414 | 0.031709 | 23.22 |
| 600839 | 2017 | -0.75 | 0.01 | 0.06535 | 0.00427067 | 24.90414 | 0.031709 | 23.22 |
| 600839 | 2017 | -0.04 | 0.01 | 0.06535 | 0.00427067 | 24.90414 | 0.031709 | 23.22 |
| 600839 | 2017 | 0.579 | 0.01 | 0.06535 | 0.00427067 | 24.90414 | 0.031709 | 23.22 |
| 876    | 2017 | 0.34  | 0.01 | 0.06535 | 0.00427067 | 24.47163 | 0.111768 | 29.08 |
| 876    | 2017 | -0.24 | 0.01 | 0.06535 | 0.00427067 | 24.47163 | 0.111768 | 29.08 |
| 876    | 2017 | -0.31 | 0.01 | 0.06535 | 0.00427067 | 24.47163 | 0.111768 | 29.08 |
| 600839 | 2017 | -0.75 | 0.01 | 0.06535 | 0.00427067 | 24.90414 | 0.031709 | 23.22 |
| 601208 | 2017 | 0.753 | 0.01 | 0.06535 | 0.00427067 | 21.82665 | 0.044836 | 22.94 |
| 801    | 2017 | -0.23 | 0.01 | 0.06535 | 0.00427067 | 22.33182 | 0.000344 | 47.61 |
| 600839 | 2017 | -0.12 | 0.01 | 0.06535 | 0.00427067 | 24.90414 | 0.031709 | 23.22 |
| 2258   | 2017 | 0.583 | 0.01 | 0.06535 | 0.00427067 | 22.23057 | 0.157415 | 27.36 |
| 601208 | 2017 | 0.716 | 0.01 | 0.06535 | 0.00427067 | 21.82665 | 0.044836 | 22.94 |
| 801    | 2017 | 0.323 | 0.01 | 0.06535 | 0.00427067 | 22.33182 | 0.000344 | 47.61 |
| 600839 | 2017 | 0.472 | 0.01 | 0.06535 | 0.00427067 | 24.90414 | 0.031709 | 23.22 |
| 600839 | 2017 | 0.138 | 0.01 | 0.06535 | 0.00427067 | 24.90414 | 0.031709 | 23.22 |
| 300432 | 2017 | -0.19 | 0.01 | 0.06535 | 0.00427067 | 22.4295  | 0.092115 | 27.78 |
| 600839 | 2017 | 0.201 | 0.01 | 0.06535 | 0.00427067 | 24.90414 | 0.031709 | 23.22 |
| 601208 | 2017 | 0.716 | 0.01 | 0.06535 | 0.00427067 | 21.82665 | 0.044836 | 22.94 |
| 801    | 2017 | 0.985 | 0.01 | 0.06535 | 0.00427067 | 22.33182 | 0.000344 | 47.61 |
| 600839 | 2017 | -0.45 | 0.01 | 0.06535 | 0.00427067 | 24.90414 | 0.031709 | 23.22 |
| 600839 | 2017 | -0.56 | 0.01 | 0.06535 | 0.00427067 | 24.00292 | 0.031709 | 23.22 |
| 600839 | 2017 | -0.19 | 0.01 | 0.06535 | 0.00427067 | 24.90414 | 0.031709 | 23.22 |
| 601208 | 2017 | 0.827 | 0.01 | 0.06535 | 0.00427067 | 21.82665 | 0.044836 | 22.94 |
| 600839 | 2017 | -0.08 | 0.01 | 0.06535 | 0.00427067 | 24.90414 | 0.031709 | 23.22 |
| 300432 | 2017 | -0.12 | 0.01 | 0.06535 | 0.00427067 | 22.4295  | 0.092115 | 27.78 |
| 876    | 2017 | -0.06 | 0.01 | 0.06535 | 0.00427067 | 24.47163 | 0.111768 | 29.08 |
| 801    | 2017 | 0.502 | 0.01 | 0.06535 | 0.00427067 | 21.42355 | 0.000344 | 47.61 |
| 600839 | 2017 | -0.19 | 0.01 | 0.06535 | 0.00427067 | 24.90414 | 0.031709 | 23.22 |
| 600839 | 2017 | -0.38 | 0.01 | 0.06535 | 0.00427067 | 24.90414 | 0.031709 | 23.22 |
| 601208 | 2017 | 0.716 | 0.01 | 0.06535 | 0.00427067 | 21.82665 | 0.044836 | 22.94 |
| 876    | 2017 | -0.31 | 0.01 | 0.06535 | 0.00427067 | 24.47163 | 0.111768 | 29.08 |
| 300432 | 2017 | -0.23 | 0.01 | 0.06535 | 0.00427067 | 22.21932 | 0.092115 | 27.78 |
| 600839 | 2017 | -0.75 | 0.01 | 0.06535 | 0.00427067 | 24.90414 | 0.031709 | 23.22 |
| 600839 | 2017 | 0.012 | 0.01 | 0.06535 | 0.00427067 | 24.90414 | 0.031709 | 23.22 |
| 876    | 2017 | -0.98 | 0.01 | 0.06535 | 0.00427067 | 24.47163 | 0.111768 | 29.08 |
| 600839 | 2017 | -0.75 | 0.01 | 0.06535 | 0.00427067 | 24.90414 | 0.031709 | 23.22 |
| 600839 | 2017 | -0.19 | 0.01 | 0.06535 | 0.00427067 | 24.90414 | 0.031709 | 23.22 |
| 801    | 2017 | 0.867 | 0.01 | 0.06535 | 0.00427067 | 22.33182 | 0.000344 | 47.61 |
| 2258   | 2017 | 0.642 | 0.01 | 0.06535 | 0.00427067 | 22.23057 | 0.157415 | 27.36 |
| 876    | 2017 | -0.13 | 0.01 | 0.06535 | 0.00427067 | 23.86123 | 0.111768 | 29.08 |
| 801    | 2017 | 0.596 | 0.01 | 0.06535 | 0.00427067 | 22.33182 | 0.000344 | 47.61 |
| 600839 | 2017 | -0.75 | 0.01 | 0.06535 | 0.00427067 | 24.90414 | 0.031709 | 23.22 |
| 600839 | 2017 | -0.75 | 0.01 | 0.06535 | 0.00427067 | 24.90414 | 0.031709 | 23.22 |
| 600839 | 2017 | -0.23 | 0.01 | 0.06535 | 0.00427067 | 24.90414 | 0.031709 | 23.22 |
| 2258   | 2017 | 0.642 | 0.01 | 0.06535 | 0.00427067 | 22.23057 | 0.157415 | 27.36 |
| 801    | 2017 | 0.985 | 0.01 | 0.06535 | 0.00427067 | 22.33182 | 0.000344 | 47.61 |
| 600839 | 2017 | -0.3  | 0.01 | 0.06535 | 0.00427067 | 24.90414 | 0.031709 | 23.22 |
| 876    | 2017 | -0.61 | 0.01 | 0.06535 | 0.00427067 | 24.47163 | 0.111768 | 29.08 |



|        |      |       |      |          |            |          |          |       |
|--------|------|-------|------|----------|------------|----------|----------|-------|
| 601208 | 2017 | 0.716 | 0.01 | 0.06535  | 0.00427067 | 21.82665 | 0.044836 | 22.94 |
| 600839 | 2017 | -0.75 | 0.01 | 0.06535  | 0.00427067 | 24.90414 | 0.031709 | 23.22 |
| 600839 | 2017 | -0.58 | 0.01 | 0.06535  | 0.00427067 | 24.90414 | 0.031709 | 23.22 |
| 600839 | 2017 | -0.5  | 0.01 | 0.06535  | 0.00427067 | 24.90414 | 0.031709 | 23.22 |
| 600839 | 2017 | 0.579 | 0.01 | 0.06535  | 0.00427067 | 24.90414 | 0.031709 | 23.22 |
| 300432 | 2017 | -0.39 | 0.01 | 0.06535  | 0.00427067 | 22.4295  | 0.092115 | 27.78 |
| 600839 | 2017 | 0.201 | 0.01 | 0.06535  | 0.00427067 | 24.90414 | 0.031709 | 23.22 |
| 876    | 2017 | -0.31 | 0.01 | 0.06535  | 0.00427067 | 24.47163 | 0.111768 | 29.08 |
| 423    | 2017 | 0.042 | 0.01 | 0.962866 | 0.92711069 | 23.23903 | 0.20706  | 23.14 |
| 300121 | 2017 | 0.842 | 0.01 | 0.962866 | 0.92711069 | 21.20793 | 0.237875 | 38.97 |
| 300121 | 2017 | 0.842 | 0.01 | 0.962866 | 0.92711069 | 21.20793 | 0.237875 | 38.97 |
| 957    | 2017 | -0.63 | 0.01 | 0.962866 | 0.92711069 | 23.24307 | 0.068645 | 21.07 |
| 300121 | 2017 | 0.577 | 0.01 | 0.962866 | 0.92711069 | 21.20793 | 0.237875 | 38.97 |
| 830    | 2017 | -0.43 | 0.01 | 0.962866 | 0.92711069 | 24.04739 | 0.185847 | 33.6  |
| 830    | 2017 | -0.67 | 0.01 | 0.962866 | 0.92711069 | 24.04739 | 0.185847 | 33.6  |
| 830    | 2017 | -0.43 | 0.01 | 0.962866 | 0.92711069 | 24.04739 | 0.185847 | 33.6  |
| 830    | 2017 | 0.656 | 0.01 | 0.962866 | 0.92711069 | 24.04739 | 0.185847 | 33.6  |
| 423    | 2017 | -0.05 | 0.01 | 0.962866 | 0.92711069 | 23.23903 | 0.20706  | 23.14 |
| 830    | 2017 | -0.01 | 0.01 | 0.962866 | 0.92711069 | 24.04739 | 0.185847 | 33.6  |
| 423    | 2017 | 0.06  | 0.01 | 0.962866 | 0.92711069 | 23.22914 | 0.20706  | 23.14 |
| 830    | 2017 | 0.259 | 0.01 | 0.962866 | 0.92711069 | 24.04739 | 0.185847 | 33.6  |
| 830    | 2017 | -0.43 | 0.01 | 0.962866 | 0.92711069 | 24.04739 | 0.185847 | 33.6  |
| 423    | 2017 | 0.06  | 0.01 | 0.962866 | 0.92711069 | 23.23903 | 0.20706  | 23.14 |
| 300121 | 2017 | 0.577 | 0.01 | 0.962866 | 0.92711069 | 21.20793 | 0.237875 | 38.97 |
| 830    | 2017 | -0.11 | 0.01 | 0.962866 | 0.92711069 | 24.04739 | 0.185847 | 33.6  |
| 423    | 2017 | 0.042 | 0.01 | 0.962866 | 0.92711069 | 23.23903 | 0.20706  | 23.14 |
| 300121 | 2017 | 0.842 | 0.01 | 0.962866 | 0.92711069 | 20.95683 | 0.237875 | 38.97 |
| 957    | 2017 | -0.1  | 0.01 | 0.962866 | 0.92711069 | 23.24307 | 0.068645 | 21.07 |
| 830    | 2017 | 0.215 | 0.01 | 0.962866 | 0.92711069 | 24.04739 | 0.185847 | 33.6  |
| 423    | 2017 | -0.01 | 0.01 | 0.962866 | 0.92711069 | 23.23903 | 0.20706  | 23.14 |
| 957    | 2017 | -0.31 | 0.01 | 0.962866 | 0.92711069 | 23.24307 | 0.068645 | 21.07 |
| 423    | 2017 | 0.001 | 0.01 | 0.962866 | 0.92711069 | 23.23903 | 0.20706  | 23.14 |
| 830    | 2017 | -0.11 | 0.01 | 0.962866 | 0.92711069 | 24.04739 | 0.185847 | 33.6  |
| 830    | 2017 | 0.656 | 0.01 | 0.962866 | 0.92711069 | 24.04739 | 0.185847 | 33.6  |
| 423    | 2017 | 0.61  | 0.01 | 0.962866 | 0.92711069 | 23.23903 | 0.20706  | 23.14 |
| 957    | 2017 | -0.18 | 0.01 | 0.962866 | 0.92711069 | 23.24307 | 0.068645 | 21.07 |
| 830    | 2017 | -0.11 | 0.01 | 0.962866 | 0.92711069 | 24.04739 | 0.185847 | 33.6  |
| 830    | 2017 | 0.656 | 0.01 | 0.962866 | 0.92711069 | 23.87501 | 0.185847 | 33.6  |
| 830    | 2017 | -0.43 | 0.01 | 0.962866 | 0.92711069 | 24.04739 | 0.185847 | 33.6  |
| 830    | 2017 | -0.04 | 0.01 | 0.962866 | 0.92711069 | 24.04739 | 0.185847 | 33.6  |
| 830    | 2017 | -0.67 | 0.01 | 0.962866 | 0.92711069 | 24.04739 | 0.185847 | 33.6  |
| 957    | 2017 | -0.1  | 0.01 | 0.962866 | 0.92711069 | 23.24307 | 0.068645 | 21.07 |
| 300121 | 2017 | 0.842 | 0.01 | 0.962866 | 0.92711069 | 21.20793 | 0.237875 | 38.97 |
| 423    | 2017 | 0.042 | 0.01 | 0.962866 | 0.92711069 | 23.23903 | 0.20706  | 23.14 |
| 830    | 2017 | 0.656 | 0.01 | 0.962866 | 0.92711069 | 24.04739 | 0.185847 | 33.6  |
| 957    | 2017 | -0.22 | 0.01 | 0.962866 | 0.92711069 | 23.20792 | 0.068645 | 21.07 |
| 830    | 2017 | -0.67 | 0.01 | 0.962866 | 0.92711069 | 24.04739 | 0.185847 | 33.6  |
| 830    | 2017 | -0.1  | 0.01 | 0.962866 | 0.92711069 | 24.04739 | 0.185847 | 33.6  |
| 300121 | 2017 | 0.621 | 0.01 | 0.962866 | 0.92711069 | 21.20793 | 0.237875 | 38.97 |
| 300063 | 2017 | 0.579 | 0.02 | 0.862018 | 0.74307549 | 21.98984 | -0.16777 | 23.5  |
| 2715   | 2017 | 0.663 | 0.02 | 0.862018 | 0.74307549 | 20.36487 | 0.018793 | 12.91 |
| 300176 | 2017 | -0.82 | 0.02 | 0.862018 | 0.74307549 | 21.69742 | 0.302158 | 29.23 |
| 2101   | 2017 | 0.098 | 0.02 | 0.862018 | 0.74307549 | 22.78955 | 0.075004 | 14.5  |
| 636    | 2017 | -0.18 | 0.02 | 0.862018 | 0.74307549 | 22.56839 | 0.057202 | 20.03 |

|        |      |       |      |          |            |          |          |       |
|--------|------|-------|------|----------|------------|----------|----------|-------|
| 300063 | 2017 | 0.579 | 0.02 | 0.862018 | 0.74307549 | 21.98984 | -0.16777 | 23.5  |
| 2806   | 2017 | 0.837 | 0.02 | 0.862018 | 0.74307549 | 20.25316 | 0.075772 | 42.79 |
| 300063 | 2017 | 0.579 | 0.02 | 0.862018 | 0.74307549 | 21.98984 | -0.16777 | 23.5  |
| 300063 | 2017 | 0.579 | 0.02 | 0.862018 | 0.74307549 | 21.98984 | -0.16777 | 23.5  |
| 636    | 2017 | -0.26 | 0.02 | 0.862018 | 0.74307549 | 22.56839 | 0.057202 | 20.03 |
| 600866 | 2017 | 0.713 | 0.02 | 0.862018 | 0.74307549 | 21.09394 | -0.17314 | 14.94 |
| 2806   | 2017 | 0.174 | 0.02 | 0.862018 | 0.74307549 | 20.25316 | 0.075772 | 42.79 |
| 2101   | 2017 | -0.25 | 0.02 | 0.862018 | 0.74307549 | 22.78955 | 0.075004 | 14.5  |
| 600866 | 2017 | 0.713 | 0.02 | 0.862018 | 0.74307549 | 21.09394 | -0.17314 | 14.94 |
| 2101   | 2017 | -0.15 | 0.02 | 0.862018 | 0.74307549 | 22.78955 | 0.075004 | 14.5  |
| 636    | 2017 | 0.042 | 0.02 | 0.862018 | 0.74307549 | 22.56839 | 0.057202 | 20.03 |
| 2101   | 2017 | 0.372 | 0.02 | 0.862018 | 0.74307549 | 22.78955 | 0.075004 | 14.5  |
| 300063 | 2017 | 0.579 | 0.02 | 0.862018 | 0.74307549 | 21.6261  | -0.16777 | 23.5  |
| 2101   | 2017 | -0.25 | 0.02 | 0.862018 | 0.74307549 | 22.78955 | 0.075004 | 14.5  |
| 300063 | 2017 | 0.579 | 0.02 | 0.862018 | 0.74307549 | 21.98984 | -0.16777 | 23.5  |
| 636    | 2017 | -0.43 | 0.02 | 0.862018 | 0.74307549 | 22.56839 | 0.057202 | 20.03 |
| 636    | 2017 | 0.263 | 0.02 | 0.862018 | 0.74307549 | 22.56839 | 0.057202 | 20.03 |
| 636    | 2017 | 0.263 | 0.02 | 0.862018 | 0.74307549 | 22.56839 | 0.057202 | 20.03 |
| 2806   | 2017 | 0.174 | 0.02 | 0.862018 | 0.74307549 | 20.25316 | 0.075772 | 42.79 |
| 636    | 2017 | 0.705 | 0.02 | 0.862018 | 0.74307549 | 22.56839 | 0.057202 | 20.03 |
| 636    | 2017 | 0.263 | 0.02 | 0.862018 | 0.74307549 | 22.56839 | 0.057202 | 20.03 |
| 636    | 2017 | -0.09 | 0.02 | 0.862018 | 0.74307549 | 22.56839 | 0.057202 | 20.03 |
| 2806   | 2017 | 0.395 | 0.02 | 0.862018 | 0.74307549 | 20.25316 | 0.075772 | 42.79 |
| 2101   | 2017 | -0.25 | 0.02 | 0.862018 | 0.74307549 | 22.78955 | 0.075004 | 14.5  |
| 300176 | 2017 | -0.82 | 0.02 | 0.862018 | 0.74307549 | 21.69742 | 0.302158 | 29.23 |
| 636    | 2017 | 0.263 | 0.02 | 0.862018 | 0.74307549 | 22.56839 | 0.057202 | 20.03 |
| 2715   | 2017 | 0.663 | 0.02 | 0.862018 | 0.74307549 | 20.20531 | 0.018793 | 12.91 |
| 2101   | 2017 | 0.073 | 0.02 | 0.862018 | 0.74307549 | 22.78955 | 0.075004 | 14.5  |
| 300176 | 2017 | -0.82 | 0.02 | 0.862018 | 0.74307549 | 21.69742 | 0.302158 | 29.23 |
| 2101   | 2017 | -0.25 | 0.02 | 0.862018 | 0.74307549 | 22.78955 | 0.075004 | 14.5  |
| 636    | 2017 | 0.705 | 0.02 | 0.862018 | 0.74307549 | 22.56839 | 0.057202 | 20.03 |
| 636    | 2017 | 0.238 | 0.02 | 0.862018 | 0.74307549 | 22.54057 | 0.057202 | 20.03 |
| 2806   | 2017 | 0.837 | 0.02 | 0.862018 | 0.74307549 | 20.25316 | 0.075772 | 42.79 |
| 300063 | 2017 | 0.579 | 0.02 | 0.862018 | 0.74307549 | 21.98984 | -0.16777 | 23.5  |
| 2101   | 2017 | -0.51 | 0.02 | 0.862018 | 0.74307549 | 22.78955 | 0.075004 | 14.5  |
| 600866 | 2017 | 0.713 | 0.02 | 0.862018 | 0.74307549 | 21.09394 | -0.17314 | 14.94 |
| 636    | 2017 | 0.042 | 0.02 | 0.862018 | 0.74307549 | 22.56839 | 0.057202 | 20.03 |
| 300176 | 2017 | -0.82 | 0.02 | 0.862018 | 0.74307549 | 21.30347 | 0.302158 | 29.23 |
| 300063 | 2017 | 0.579 | 0.02 | 0.862018 | 0.74307549 | 21.98984 | -0.16777 | 23.5  |
| 600866 | 2017 | 0.713 | 0.02 | 0.862018 | 0.74307549 | 21.22205 | -0.17314 | 14.94 |
| 2806   | 2017 | 0.307 | 0.02 | 0.862018 | 0.74307549 | 20.10336 | 0.075772 | 42.79 |
| 2101   | 2017 | -0.25 | 0.02 | 0.862018 | 0.74307549 | 22.78955 | 0.075004 | 14.5  |
| 636    | 2017 | 0.399 | 0.02 | 0.862018 | 0.74307549 | 22.56839 | 0.057202 | 20.03 |
| 2715   | 2017 | 0.663 | 0.02 | 0.862018 | 0.74307549 | 20.36487 | 0.018793 | 12.91 |
| 300176 | 2017 | -0.82 | 0.02 | 0.862018 | 0.74307549 | 21.69742 | 0.302158 | 29.23 |
| 2806   | 2017 | 0.174 | 0.02 | 0.862018 | 0.74307549 | 20.25316 | 0.075772 | 42.79 |
| 2101   | 2017 | -0.25 | 0.02 | 0.862018 | 0.74307549 | 22.78955 | 0.075004 | 14.5  |
| 300063 | 2017 | 0.579 | 0.02 | 0.862018 | 0.74307549 | 21.98984 | -0.16777 | 23.5  |
| 600866 | 2017 | 0.713 | 0.02 | 0.862018 | 0.74307549 | 21.09394 | -0.17314 | 14.94 |
| 636    | 2017 | 0.705 | 0.02 | 0.862018 | 0.74307549 | 22.56839 | 0.057202 | 20.03 |
| 2101   | 2017 | 0.019 | 0.02 | 0.862018 | 0.74307549 | 22.37707 | 0.075004 | 14.5  |
| 2630   | 2017 | -0.37 | 0.01 | 1.000215 | 1.0004291  | 23.38137 | 0.05786  | 23.05 |
| 2630   | 2017 | 0.466 | 0.01 | 1.000215 | 1.0004291  | 23.38137 | 0.05786  | 23.05 |
| 600558 | 2017 | -0.47 | 0.01 | 1.000215 | 1.0004291  | 21.5196  | 0.028085 | 33.14 |

|        |      |       |      |          |            |          |          |       |
|--------|------|-------|------|----------|------------|----------|----------|-------|
| 2272   | 2017 | -0.7  | 0.01 | 1.000215 | 1.0004291  | 20.91242 | 0.005429 | 18.15 |
| 600558 | 2017 | -0.47 | 0.01 | 1.000215 | 1.0004291  | 21.5196  | 0.028085 | 33.14 |
| 2630   | 2017 | 0.466 | 0.01 | 1.000215 | 1.0004291  | 23.16052 | 0.05786  | 23.05 |
| 2630   | 2017 | -0.58 | 0.01 | 1.000215 | 1.0004291  | 23.38137 | 0.05786  | 23.05 |
| 2630   | 2017 | -0.51 | 0.01 | 1.000215 | 1.0004291  | 23.38137 | 0.05786  | 23.05 |
| 600558 | 2017 | 0.75  | 0.01 | 1.000215 | 1.0004291  | 21.7751  | 0.028085 | 33.14 |
| 600558 | 2017 | -0.01 | 0.01 | 1.000215 | 1.0004291  | 21.5196  | 0.028085 | 33.14 |
| 2272   | 2017 | -0.7  | 0.01 | 1.000215 | 1.0004291  | 21.17485 | 0.005429 | 18.15 |
| 2272   | 2017 | -0.37 | 0.01 | 1.000215 | 1.0004291  | 21.17485 | 0.005429 | 18.15 |
| 2272   | 2017 | -0.7  | 0.01 | 1.000215 | 1.0004291  | 21.17485 | 0.005429 | 18.15 |
| 2630   | 2017 | -0.27 | 0.01 | 1.000215 | 1.0004291  | 23.38137 | 0.05786  | 23.05 |
| 2630   | 2017 | -0.27 | 0.01 | 1.000215 | 1.0004291  | 23.38137 | 0.05786  | 23.05 |
| 2272   | 2017 | -0.7  | 0.01 | 1.000215 | 1.0004291  | 21.17485 | 0.005429 | 18.15 |
| 2630   | 2017 | -0.34 | 0.01 | 1.000215 | 1.0004291  | 23.38137 | 0.05786  | 23.05 |
| 2272   | 2017 | 0.059 | 0.01 | 1.000215 | 1.0004291  | 21.17485 | 0.005429 | 18.15 |
| 600558 | 2017 | -0.35 | 0.01 | 1.000215 | 1.0004291  | 21.5196  | 0.028085 | 33.14 |
| 2630   | 2017 | -0.05 | 0.01 | 1.000215 | 1.0004291  | 23.38137 | 0.05786  | 23.05 |
| 600558 | 2017 | -0.28 | 0.01 | 1.000215 | 1.0004291  | 21.5196  | 0.028085 | 33.14 |
| 2630   | 2017 | -0.27 | 0.01 | 1.000215 | 1.0004291  | 23.38137 | 0.05786  | 23.05 |
| 600558 | 2017 | 0.189 | 0.01 | 1.000215 | 1.0004291  | 21.5196  | 0.028085 | 33.14 |
| 600558 | 2017 | -0.28 | 0.01 | 1.000215 | 1.0004291  | 21.5196  | 0.028085 | 33.14 |
| 600558 | 2017 | 0.75  | 0.01 | 1.000215 | 1.0004291  | 21.5196  | 0.028085 | 33.14 |
| 2272   | 2017 | -0.4  | 0.01 | 1.000215 | 1.0004291  | 21.17485 | 0.005429 | 18.15 |
| 2630   | 2017 | -0.53 | 0.01 | 1.000215 | 1.0004291  | 23.38137 | 0.05786  | 23.05 |
| 2630   | 2017 | -0.71 | 0.01 | 1.000215 | 1.0004291  | 23.38137 | 0.05786  | 23.05 |
| 619    | 2017 | -0.72 | 0.04 | 0.297252 | 0.08835854 | 21.98131 | 0.005618 | 30.63 |
| 300088 | 2017 | 0.075 | 0.04 | 0.297252 | 0.08835854 | 22.73661 | 0.124695 | 18.97 |
| 600255 | 2017 | -0.69 | 0.04 | 0.297252 | 0.08835854 | 22.49592 | 0.052677 | 10    |
| 2298   | 2017 | -0.44 | 0.04 | 0.297252 | 0.08835854 | 22.49166 | 0.043214 | 18.1  |
| 2298   | 2017 | -0.44 | 0.04 | 0.297252 | 0.08835854 | 22.49166 | 0.043214 | 18.1  |
| 300088 | 2017 | 0.546 | 0.04 | 0.297252 | 0.08835854 | 22.73661 | 0.124695 | 18.97 |
| 2298   | 2017 | 0.409 | 0.04 | 0.297252 | 0.08835854 | 22.49166 | 0.043214 | 18.1  |
| 2171   | 2017 | 0.463 | 0.04 | 0.297252 | 0.08835854 | 22.27813 | 0.105018 | 40.38 |
| 2171   | 2017 | 0.448 | 0.04 | 0.297252 | 0.08835854 | 22.27813 | 0.105018 | 40.38 |
| 300088 | 2017 | -0.78 | 0.04 | 0.297252 | 0.08835854 | 22.73661 | 0.124695 | 18.97 |
| 2171   | 2017 | 0.617 | 0.04 | 0.297252 | 0.08835854 | 22.27813 | 0.105018 | 40.38 |
| 2298   | 2017 | -0.11 | 0.04 | 0.297252 | 0.08835854 | 22.49166 | 0.043214 | 18.1  |
| 2298   | 2017 | 0.882 | 0.04 | 0.297252 | 0.08835854 | 22.49166 | 0.043214 | 18.1  |
| 600255 | 2017 | -0.69 | 0.04 | 0.297252 | 0.08835854 | 22.49592 | 0.052677 | 10    |
| 600255 | 2017 | -0.69 | 0.04 | 0.297252 | 0.08835854 | 22.49592 | 0.052677 | 10    |
| 619    | 2017 | -0.57 | 0.04 | 0.297252 | 0.08835854 | 21.98131 | 0.005618 | 30.63 |
| 2361   | 2017 | 0.012 | 0.04 | 0.297252 | 0.08835854 | 21.87825 | 0.066372 | 22.78 |
| 2361   | 2017 | 0.077 | 0.04 | 0.297252 | 0.08835854 | 21.87825 | 0.066372 | 22.78 |
| 2298   | 2017 | -0.04 | 0.04 | 0.297252 | 0.08835854 | 22.49166 | 0.043214 | 18.1  |
| 619    | 2017 | -0.38 | 0.04 | 0.297252 | 0.08835854 | 21.98131 | 0.005618 | 30.63 |
| 2361   | 2017 | 0.795 | 0.04 | 0.297252 | 0.08835854 | 21.71601 | 0.066372 | 22.78 |
| 153    | 2017 | 0.401 | 0.04 | 0.297252 | 0.08835854 | 21.55809 | 0.053544 | 11.3  |
| 2361   | 2017 | 0.795 | 0.04 | 0.297252 | 0.08835854 | 21.87825 | 0.066372 | 22.78 |
| 300088 | 2017 | 0.15  | 0.04 | 0.297252 | 0.08835854 | 22.73661 | 0.124695 | 18.97 |
| 600255 | 2017 | -0.69 | 0.04 | 0.297252 | 0.08835854 | 22.49592 | 0.052677 | 10    |
| 2361   | 2017 | 0.795 | 0.04 | 0.297252 | 0.08835854 | 21.87825 | 0.066372 | 22.78 |
| 153    | 2017 | 0.401 | 0.04 | 0.297252 | 0.08835854 | 21.74129 | 0.053544 | 11.3  |
| 300088 | 2017 | 0.3   | 0.04 | 0.297252 | 0.08835854 | 22.73661 | 0.124695 | 18.97 |
| 300088 | 2017 | 0.52  | 0.04 | 0.297252 | 0.08835854 | 22.73661 | 0.124695 | 18.97 |

|        |      |       |      |          |            |          |          |       |
|--------|------|-------|------|----------|------------|----------|----------|-------|
| 2555   | 2017 | 0.97  | 0.04 | 0.297252 | 0.08835854 | 22.93813 | 0.252036 | 18.79 |
| 2361   | 2017 | 0.795 | 0.04 | 0.297252 | 0.08835854 | 21.87825 | 0.066372 | 22.78 |
| 153    | 2017 | 0.306 | 0.04 | 0.297252 | 0.08835854 | 21.74129 | 0.053544 | 11.3  |
| 2171   | 2017 | 0.617 | 0.04 | 0.297252 | 0.08835854 | 22.27813 | 0.105018 | 40.38 |
| 300088 | 2017 | -0.78 | 0.04 | 0.297252 | 0.08835854 | 22.73661 | 0.124695 | 18.97 |
| 2555   | 2017 | 1.581 | 0.04 | 0.297252 | 0.08835854 | 22.80299 | 0.252036 | 18.79 |
| 2171   | 2017 | 0.482 | 0.04 | 0.297252 | 0.08835854 | 22.27813 | 0.105018 | 40.38 |
| 2171   | 2017 | 0.617 | 0.04 | 0.297252 | 0.08835854 | 22.27813 | 0.105018 | 40.38 |
| 2361   | 2017 | 0.795 | 0.04 | 0.297252 | 0.08835854 | 21.87825 | 0.066372 | 22.78 |
| 2298   | 2017 | 0.251 | 0.04 | 0.297252 | 0.08835854 | 22.49166 | 0.043214 | 18.1  |
| 600255 | 2017 | -0.69 | 0.04 | 0.297252 | 0.08835854 | 22.49592 | 0.052677 | 10    |
| 2361   | 2017 | 0.012 | 0.04 | 0.297252 | 0.08835854 | 21.87825 | 0.066372 | 22.78 |
| 619    | 2017 | -0.57 | 0.04 | 0.297252 | 0.08835854 | 21.7447  | 0.005618 | 30.63 |
| 619    | 2017 | -0.48 | 0.04 | 0.297252 | 0.08835854 | 21.98131 | 0.005618 | 30.63 |
| 300088 | 2017 | 0.016 | 0.04 | 0.297252 | 0.08835854 | 22.73661 | 0.124695 | 18.97 |
| 2171   | 2017 | 0.617 | 0.04 | 0.297252 | 0.08835854 | 22.27813 | 0.105018 | 40.38 |
| 2298   | 2017 | 0.464 | 0.04 | 0.297252 | 0.08835854 | 22.49166 | 0.043214 | 18.1  |
| 300088 | 2017 | 0.104 | 0.04 | 0.297252 | 0.08835854 | 22.40272 | 0.124695 | 18.97 |
| 2555   | 2017 | 1.013 | 0.04 | 0.297252 | 0.08835854 | 22.93813 | 0.252036 | 18.79 |
| 600255 | 2017 | -0.69 | 0.04 | 0.297252 | 0.08835854 | 22.22955 | 0.052677 | 10    |
| 153    | 2017 | 0.401 | 0.04 | 0.297252 | 0.08835854 | 21.74129 | 0.053544 | 11.3  |
| 619    | 2017 | -0.19 | 0.04 | 0.297252 | 0.08835854 | 21.98131 | 0.005618 | 30.63 |
| 2171   | 2017 | 0.617 | 0.04 | 0.297252 | 0.08835854 | 22.27813 | 0.105018 | 40.38 |
| 2298   | 2017 | 0.464 | 0.04 | 0.297252 | 0.08835854 | 22.49166 | 0.043214 | 18.1  |
| 600255 | 2017 | -0.69 | 0.04 | 0.297252 | 0.08835854 | 22.49592 | 0.052677 | 10    |
| 2555   | 2017 | 1.581 | 0.04 | 0.297252 | 0.08835854 | 22.93813 | 0.252036 | 18.79 |
| 300088 | 2017 | -0.22 | 0.04 | 0.297252 | 0.08835854 | 22.73661 | 0.124695 | 18.97 |
| 619    | 2017 | -0.72 | 0.04 | 0.297252 | 8.84E-02   | 21.98131 | 0.005618 | 30.63 |
| 2298   | 2017 | -0.44 | 0.04 | 0.297252 | 8.84E-02   | 22.49166 | 0.043214 | 18.1  |
| 300088 | 2017 | 0.546 | 0.04 | 0.297252 | 8.84E-02   | 22.73661 | 0.124695 | 18.97 |
| 2555   | 2017 | 0.97  | 0.04 | 0.297252 | 8.84E-02   | 22.93813 | 0.252036 | 18.79 |
| 300088 | 2017 | -0.78 | 0.04 | 0.297252 | 8.84E-02   | 22.73661 | 0.124695 | 18.97 |
| 2171   | 2017 | 0.617 | 0.04 | 0.297252 | 8.84E-02   | 22.27813 | 0.105018 | 40.38 |
| 300088 | 2017 | 0.38  | 0.04 | 0.297252 | 8.84E-02   | 22.73661 | 0.124695 | 18.97 |
| 2298   | 2017 | 0.209 | 0.04 | 0.297252 | 8.84E-02   | 22.49166 | 0.043214 | 18.1  |
| 300088 | 2017 | -0.78 | 0.04 | 0.297252 | 8.84E-02   | 22.73661 | 0.124695 | 18.97 |
| 619    | 2017 | -0.41 | 0.04 | 0.297252 | 8.84E-02   | 21.98131 | 0.005618 | 30.63 |
| 2171   | 2017 | 0.617 | 0.04 | 0.297252 | 8.84E-02   | 21.99723 | 0.105018 | 40.38 |
| 153    | 2017 | 0.496 | 0.04 | 0.297252 | 8.84E-02   | 21.74129 | -0.01156 | 11.3  |
| 153    | 2017 | 0.401 | 0.04 | 0.297252 | 8.84E-02   | 21.74129 | 0.053544 | 11.3  |
| 2298   | 2017 | 0.882 | 0.04 | 0.297252 | 8.84E-02   | 22.49166 | 0.043214 | 18.1  |
| 2298   | 2017 | -0.06 | 0.04 | 0.297252 | 8.84E-02   | 22.35136 | 0.043214 | 18.1  |
| 153    | 2017 | 0.401 | 0.04 | 0.297252 | 8.84E-02   | 21.74129 | 0.053544 | 11.3  |
| 2298   | 2017 | 0.882 | 0.04 | 0.297252 | 8.84E-02   | 22.49166 | 0.043214 | 18.1  |
| 300228 | 2017 | 0.033 | 0.02 | 0.898381 | 8.07E-01   | 22.15978 | 0.027359 | 9.24  |
| 300393 | 2017 | 0.152 | 0.02 | 0.898381 | 0.80708752 | 22.54679 | 0.098697 | 36.71 |
| 600487 | 2017 | -0.39 | 0.02 | 0.898381 | 0.80708752 | 24.06359 | 0.202103 | 19.93 |
| 600487 | 2017 | -0.22 | 0.02 | 0.898381 | 0.80708752 | 24.06359 | 0.202103 | 19.93 |
| 300013 | 2017 | 0.875 | 0.02 | 0.898381 | 0.80708752 | 21.47695 | 0.103327 | 11.04 |
| 551    | 2017 | 0.214 | 0.02 | 0.898381 | 0.80708752 | 22.16251 | 0.063595 | 34.33 |
| 2491   | 2017 | 0.296 | 0.02 | 0.898381 | 0.80708752 | 22.88302 | 0.13249  | 36.9  |
| 300393 | 2017 | 0.04  | 0.02 | 0.898381 | 0.80708752 | 22.13983 | 0.098697 | 36.71 |
| 2631   | 2017 | -0.62 | 0.02 | 0.898381 | 0.80708752 | 21.59546 | 0.054996 | 54.86 |
| 2384   | 2017 | -0.12 | 0.02 | 0.898381 | 0.80708752 | 23.81945 | 0.068071 | 18.41 |

|        |      |       |      |          |            |          |          |       |
|--------|------|-------|------|----------|------------|----------|----------|-------|
| 2384   | 2017 | -0.33 | 0.02 | 0.898381 | 0.80708752 | 23.81945 | 0.068071 | 18.41 |
| 600487 | 2017 | 0.537 | 0.02 | 0.898381 | 0.80708752 | 24.06359 | 0.202103 | 19.93 |
| 2150   | 2017 | -0.84 | 0.02 | 0.898381 | 0.80708752 | 21.091   | 0.070406 | 38.32 |
| 2309   | 2017 | -0.19 | 0.02 | 0.898381 | 0.80708752 | 24.18366 | 0.041465 | 34.86 |
| 2450   | 2017 | 0.785 | 0.02 | 0.898381 | 0.80708752 | 24.25731 | 0.137323 | 24.06 |
| 2309   | 2017 | 0.323 | 0.02 | 0.898381 | 0.80708752 | 24.18366 | 0.041465 | 34.86 |
| 2245   | 2017 | -0.13 | 0.02 | 0.898381 | 0.80708752 | 22.59791 | 0.146821 | 32.19 |
| 777    | 2017 | -0.57 | 0.02 | 0.898381 | 0.80708752 | 21.44899 | 0.031108 | 17.92 |
| 551    | 2017 | 0.14  | 0.02 | 0.898381 | 0.80708752 | 22.16251 | 0.063595 | 34.33 |
| 2150   | 2017 | -0.55 | 0.02 | 0.898381 | 0.80708752 | 21.091   | 0.070406 | 38.32 |
| 300522 | 2017 | 0.42  | 0.02 | 0.898381 | 0.80708752 | 20.26869 | 0.090739 | 39.65 |
| 2450   | 2017 | 0.762 | 0.02 | 0.898381 | 0.80708752 | 24.25731 | 0.137323 | 24.06 |
| 2172   | 2017 | 0.082 | 0.02 | 0.898381 | 0.80708752 | 22.42862 | 0.095667 | 48.97 |
| 2172   | 2017 | 0.082 | 0.02 | 0.898381 | 0.80708752 | 22.42862 | 0.095667 | 48.97 |
| 2450   | 2017 | 0.762 | 0.02 | 0.898381 | 0.80708752 | 24.25731 | 0.137323 | 24.06 |
| 2426   | 2017 | -0.24 | 0.02 | 0.898381 | 0.80708752 | 23.64066 | 0.051329 | 27.69 |
| 300128 | 2017 | -0.68 | 0.02 | 0.898381 | 0.80708752 | 22.08923 | 0.036384 | 21.3  |
| 300416 | 2017 | -0.03 | 0.02 | 0.898381 | 0.80708752 | 20.7764  | 0.115307 | 47.77 |
| 600200 | 2017 | 0.57  | 0.02 | 0.898381 | 0.80708752 | 22.25681 | 0.046141 | 17.01 |
| 600487 | 2017 | 0.158 | 0.02 | 0.898381 | 0.80708752 | 24.06359 | 0.202103 | 19.93 |
| 2450   | 2017 | 0.682 | 0.02 | 0.898381 | 0.80708752 | 24.25731 | 0.137323 | 24.06 |
| 2519   | 2017 | 0.515 | 0.02 | 0.898381 | 0.80708752 | 22.36975 | 0.051506 | 30.35 |
| 2079   | 2017 | -0.32 | 0.02 | 0.898381 | 0.80708752 | 21.40687 | 0.091663 | 34.28 |
| 2245   | 2017 | -0.13 | 0.02 | 0.898381 | 0.80708752 | 22.59791 | 0.146821 | 32.19 |
| 2547   | 2017 | -0.67 | 0.02 | 0.898381 | 0.80708752 | 22.57745 | -0.1279  | 38.54 |
| 2367   | 2017 | 0.043 | 0.02 | 0.898381 | 0.80708752 | 22.44777 | 0.08674  | 44.96 |
| 2309   | 2017 | -0.64 | 0.02 | 0.898381 | 0.80708752 | 24.18366 | 0.041465 | 34.86 |
| 2491   | 2017 | 0.445 | 0.02 | 0.898381 | 0.80708752 | 22.88302 | 0.13249  | 36.9  |
| 2091   | 2017 | 0.342 | 0.02 | 0.898381 | 0.80708752 | 23.6555  | 0.126167 | 33.48 |
| 2652   | 2017 | -0.24 | 0.02 | 0.898381 | 0.80708752 | 21.00748 | 0.142098 | 24.02 |
| 600487 | 2017 | -0.61 | 0.02 | 0.898381 | 0.80708752 | 24.06359 | 0.202103 | 19.93 |
| 300393 | 2017 | 0.175 | 0.02 | 0.898381 | 0.80708752 | 22.54679 | 0.098697 | 36.71 |
| 2514   | 2017 | -0.41 | 0.02 | 0.898381 | 0.80708752 | 21.1921  | 0.046113 | 24.07 |
| 300390 | 2017 | 0.665 | 0.02 | 0.898381 | 0.80708752 | 20.75229 | 0.040884 | 34.75 |
| 600487 | 2017 | -0.23 | 0.02 | 0.898381 | 0.80708752 | 24.06359 | 0.202103 | 19.93 |
| 2426   | 2017 | -0.26 | 0.02 | 0.898381 | 0.80708752 | 23.24617 | 0.051329 | 27.69 |
| 2652   | 2017 | -0.2  | 0.02 | 0.898381 | 0.80708752 | 21.74434 | 0.142098 | 24.02 |
| 600105 | 2017 | -0.29 | 0.02 | 0.898381 | 0.80708752 | 22.27337 | 0.112394 | 36.46 |
| 603800 | 2017 | -0.43 | 0.02 | 0.898381 | 0.80708752 | 21.07969 | 0.029097 | 39.15 |
| 2309   | 2017 | 0.484 | 0.02 | 0.898381 | 0.80708752 | 24.18366 | 0.041465 | 34.86 |
| 2491   | 2017 | -0.04 | 0.02 | 0.898381 | 0.80708752 | 22.88302 | 0.13249  | 36.9  |
| 2091   | 2017 | 0.342 | 0.02 | 0.898381 | 0.80708752 | 23.6555  | 0.126167 | 33.48 |
| 2547   | 2017 | -0.4  | 0.02 | 0.898381 | 0.80708752 | 22.83976 | -0.1279  | 38.54 |
| 600200 | 2017 | 0.57  | 0.02 | 0.898381 | 0.80708752 | 22.25681 | 0.046141 | 17.01 |
| 2309   | 2017 | -0.64 | 0.02 | 0.898381 | 0.80708752 | 24.18366 | 0.041465 | 34.86 |
| 2426   | 2017 | -0.21 | 0.02 | 0.898381 | 0.80708752 | 23.64066 | 0.051329 | 27.69 |
| 300509 | 2017 | 0.363 | 0.02 | 0.898381 | 0.80708752 | 20.94205 | 0.098233 | 33    |
| 2255   | 2017 | 0.119 | 0.02 | 0.898381 | 0.80708752 | 22.6238  | 0.029746 | 13.4  |
| 2531   | 2017 | -0.56 | 0.02 | 0.898381 | 0.80708752 | 23.03212 | 0.096171 | 29.81 |
| 2787   | 2017 | -0.35 | 0.02 | 0.898381 | 0.80708752 | 20.92447 | 0.092775 | 43.18 |
| 300382 | 2017 | -0.1  | 0.02 | 0.898381 | 0.80708752 | 21.052   | 0.123009 | 64.83 |
| 300211 | 2017 | 0.255 | 0.02 | 0.898381 | 0.80708752 | 20.17458 | 0.007301 | 48.4  |
| 2384   | 2017 | -0.11 | 0.02 | 0.898381 | 0.80708752 | 23.81945 | 0.068071 | 18.41 |
| 2463   | 2017 | -0.02 | 0.02 | 0.898381 | 0.80708752 | 22.4337  | 0.058345 | 20.19 |

|        |      |       |      |          |            |          |          |       |
|--------|------|-------|------|----------|------------|----------|----------|-------|
| 600487 | 2017 | 0.714 | 0.02 | 0.898381 | 0.80708752 | 24.06359 | 0.202103 | 19.93 |
| 300128 | 2017 | -0.42 | 0.02 | 0.898381 | 0.80708752 | 22.08923 | 0.036384 | 21.3  |
| 2384   | 2017 | -0.55 | 0.02 | 0.898381 | 0.80708752 | 23.81945 | 0.068071 | 18.41 |
| 2787   | 2017 | -0.35 | 0.02 | 0.898381 | 0.80708752 | 21.02609 | 0.092775 | 43.18 |
| 2309   | 2017 | 0.291 | 0.02 | 0.898381 | 0.80708752 | 24.18366 | 0.041465 | 34.86 |
| 2491   | 2017 | 0.856 | 0.02 | 0.898381 | 0.80708752 | 22.88302 | 0.13249  | 36.9  |
| 300261 | 2017 | 1.127 | 0.02 | 0.898381 | 0.80708752 | 21.88148 | 0.038095 | 35.8  |
| 2160   | 2017 | -0.09 | 0.02 | 0.898381 | 0.80708752 | 22.59904 | 0.051875 | 25.43 |
| 2309   | 2017 | 0.026 | 0.02 | 0.898381 | 0.80708752 | 24.18366 | 0.041465 | 34.86 |
| 300128 | 2017 | -0.68 | 0.02 | 0.898381 | 0.80708752 | 22.08923 | 0.036384 | 21.3  |
| 603928 | 2017 | 0.75  | 0.02 | 0.898381 | 0.80708752 | 21.07444 | 0.119241 | 28.17 |
| 603017 | 2017 | 0.074 | 0.02 | 0.898381 | 0.80708752 | 21.78083 | 0.092444 | 36.85 |
| 600487 | 2017 | 0.714 | 0.02 | 0.898381 | 0.80708752 | 24.06359 | 0.202103 | 19.93 |
| 2564   | 2017 | -0.14 | 0.02 | 0.898381 | 0.80708752 | 23.84063 | 0.101435 | 23.79 |
| 603929 | 2017 | 0.662 | 0.02 | 0.898381 | 0.80708752 | 21.05466 | 0.128629 | 53.99 |
| 2635   | 2017 | -0.17 | 0.02 | 0.898381 | 0.80708752 | 22.66203 | 0.057394 | 27.13 |
| 300165 | 2017 | 0.655 | 0.02 | 0.898381 | 0.80708752 | 21.53486 | 0.068104 | 34.35 |
| 2453   | 2017 | 0.545 | 0.02 | 0.898381 | 0.80708752 | 21.50973 | 0.014272 | 22.09 |
| 300325 | 2017 | -0.05 | 0.02 | 0.898381 | 0.80708752 | 22.22926 | 0.011566 | 38.48 |
| 600487 | 2017 | 0.112 | 0.02 | 0.898381 | 0.80708752 | 24.06359 | 0.202103 | 19.93 |
| 300522 | 2017 | 0.42  | 0.02 | 0.898381 | 0.80708752 | 20.26869 | 0.090739 | 39.65 |
| 300549 | 2017 | 0.023 | 0.02 | 0.898381 | 0.80708752 | 20.45478 | 0.151535 | 33.77 |
| 2160   | 2017 | -0.09 | 0.02 | 0.898381 | 0.80708752 | 22.59904 | 0.051875 | 25.43 |
| 2435   | 2017 | -0.18 | 0.02 | 0.898381 | 0.80708752 | 22.64267 | 0.061881 | 37.61 |
| 300292 | 2017 | -0    | 0.02 | 0.898381 | 0.80708752 | 21.98352 | 0.08317  | 23.55 |
| 2547   | 2017 | -0.47 | 0.02 | 0.898381 | 0.80708752 | 22.83976 | -0.1279  | 38.54 |
| 603355 | 2017 | -0.14 | 0.02 | 0.898381 | 0.80708752 | 22.11181 | 0.112778 | 45.79 |
| 603800 | 2017 | -0.43 | 0.02 | 0.898381 | 0.80708752 | 21.07854 | 0.029097 | 39.15 |
| 2127   | 2017 | -0.15 | 0.02 | 0.898381 | 0.80708752 | 22.06365 | 0.175606 | 26.64 |
| 300128 | 2017 | -0.68 | 0.02 | 0.898381 | 0.80708752 | 22.08923 | 0.036384 | 21.3  |
| 300393 | 2017 | -0.32 | 0.02 | 0.898381 | 0.80708752 | 22.54679 | 0.098697 | 36.71 |
| 300382 | 2017 | 0.986 | 0.02 | 0.898381 | 0.80708752 | 21.052   | 0.123009 | 64.83 |
| 2635   | 2017 | 0.087 | 0.02 | 0.898381 | 0.80708752 | 22.8887  | 0.057394 | 27.13 |
| 300261 | 2017 | 1.127 | 0.02 | 0.898381 | 0.80708752 | 21.88148 | 0.038095 | 35.8  |
| 300228 | 2017 | 0.695 | 0.02 | 0.898381 | 0.80708752 | 22.15978 | 0.027359 | 9.24  |
| 300128 | 2017 | -0.68 | 0.02 | 0.898381 | 0.80708752 | 22.08923 | 0.036384 | 21.3  |
| 2333   | 2017 | -0.28 | 0.02 | 0.898381 | 0.80708752 | 21.22063 | -0.02742 | 65.46 |
| 600487 | 2017 | -0.04 | 0.02 | 0.898381 | 0.80708752 | 24.06359 | 0.202103 | 19.93 |
| 300211 | 2017 | 0.255 | 0.02 | 0.898381 | 0.80708752 | 20.17458 | 0.007301 | 48.4  |
| 300228 | 2017 | -0.36 | 0.02 | 0.898381 | 0.80708752 | 22.15978 | 0.027359 | 9.24  |
| 600487 | 2017 | 0.3   | 0.02 | 0.898381 | 0.80708752 | 24.06359 | 0.202103 | 19.93 |
| 2089   | 2017 | -0.39 | 0.02 | 0.898381 | 0.80708752 | 21.8518  | -0.0484  | 18.05 |
| 2435   | 2017 | -0.18 | 0.02 | 0.898381 | 0.80708752 | 22.64267 | 0.061881 | 37.61 |
| 2463   | 2017 | -0    | 0.02 | 0.898381 | 0.80708752 | 22.51374 | 0.058345 | 20.19 |
| 2255   | 2017 | 0.119 | 0.02 | 0.898381 | 8.07E-01   | 22.6238  | 0.029746 | 13.4  |
| 2435   | 2017 | -0.18 | 0.02 | 0.898381 | 8.07E-01   | 22.64267 | 0.061881 | 37.61 |
| 2309   | 2017 | -0.23 | 0.02 | 0.898381 | 8.07E-01   | 24.18366 | 0.041465 | 34.86 |
| 300128 | 2017 | -0.68 | 0.02 | 0.898381 | 8.07E-01   | 22.08923 | 0.036384 | 21.3  |
| 603699 | 2017 | 0.529 | 0.02 | 0.898381 | 8.07E-01   | 22.1646  | 0.07789  | 53.15 |
| 600487 | 2017 | -0.01 | 0.02 | 0.898381 | 8.07E-01   | 24.06359 | 0.202103 | 19.93 |
| 2453   | 2017 | 0.545 | 0.02 | 0.898381 | 8.07E-01   | 21.23054 | 0.014272 | 22.09 |
| 2091   | 2017 | 0.077 | 0.02 | 0.898381 | 8.07E-01   | 23.6555  | 0.126167 | 33.48 |
| 2075   | 2017 | 0.071 | 0.02 | 0.898381 | 8.07E-01   | 22.9908  | 0.230399 | 20.34 |
| 2631   | 2017 | -0.62 | 0.02 | 0.898381 | 8.07E-01   | 21.52832 | 0.054996 | 54.86 |

|        |      |       |      |          |            |          |          |       |
|--------|------|-------|------|----------|------------|----------|----------|-------|
| 300382 | 2017 | 0.241 | 0.02 | 0.898381 | 0.80708752 | 21.02245 | 0.123009 | 64.83 |
| 2309   | 2017 | -0.53 | 0.02 | 0.898381 | 0.80708752 | 24.18366 | 0.041465 | 34.86 |
| 300393 | 2017 | 0.308 | 0.02 | 0.898381 | 0.80708752 | 22.54679 | 0.098697 | 36.71 |
| 603990 | 2017 | 1.4   | 0.02 | 0.898381 | 0.80708752 | 20.25566 | 0.117825 | 16.96 |
| 300192 | 2017 | -0.51 | 0.02 | 0.898381 | 0.80708752 | 21.25526 | 0.006882 | 37.45 |
| 2635   | 2017 | 0.052 | 0.02 | 0.898381 | 0.80708752 | 22.8887  | 0.057394 | 27.13 |
| 2564   | 2017 | 0.332 | 0.02 | 0.898381 | 0.80708752 | 23.84063 | 0.101435 | 23.79 |
| 2384   | 2017 | -0.22 | 0.02 | 0.898381 | 0.80708752 | 23.81945 | 0.068071 | 18.41 |
| 603005 | 2017 | 1.342 | 0.02 | 0.898381 | 0.80708752 | 21.47243 | 0.053391 | 23.88 |
| 300390 | 2017 | 0.665 | 0.02 | 0.898381 | 0.80708752 | 20.75229 | 0.040884 | 34.75 |
| 300509 | 2017 | 0.365 | 0.02 | 0.898381 | 0.80708752 | 20.94205 | 0.098233 | 33    |
| 2631   | 2017 | 0.585 | 0.02 | 0.898381 | 0.80708752 | 21.52832 | 0.054996 | 54.86 |
| 2384   | 2017 | -0.4  | 0.02 | 0.898381 | 0.80708752 | 23.81945 | 0.068071 | 18.41 |
| 2160   | 2017 | -0.09 | 0.02 | 0.898381 | 0.80708752 | 22.59904 | 0.051875 | 25.43 |
| 600487 | 2017 | 5E-04 | 0.02 | 0.898381 | 0.80708752 | 24.06359 | 0.202103 | 19.93 |
| 2450   | 2017 | 1.163 | 0.02 | 0.898381 | 0.80708752 | 24.25731 | 0.137323 | 24.06 |
| 300416 | 2017 | -0.03 | 0.02 | 0.898381 | 0.80708752 | 20.7764  | 0.115307 | 47.77 |
| 300013 | 2017 | -0.45 | 0.02 | 0.898381 | 0.80708752 | 21.47695 | 0.103327 | 11.04 |
| 2514   | 2017 | -0.18 | 0.02 | 0.898381 | 0.80708752 | 20.91779 | 0.046113 | 24.07 |
| 300325 | 2017 | 0.184 | 0.02 | 0.898381 | 0.80708752 | 22.22926 | 0.011566 | 38.48 |
| 300346 | 2017 | 1.737 | 0.02 | 0.898381 | 0.80708752 | 21.00724 | 0.028922 | 12.2  |
| 600487 | 2017 | 0.107 | 0.02 | 0.898381 | 0.80708752 | 24.06359 | 0.202103 | 19.93 |
| 2089   | 2017 | -0.44 | 0.02 | 0.898381 | 0.80708752 | 22.25211 | -0.0484  | 18.05 |
| 600487 | 2017 | -0.08 | 0.02 | 0.898381 | 0.80708752 | 24.06359 | 0.202103 | 19.93 |
| 300165 | 2017 | 0.655 | 0.02 | 0.898381 | 0.80708752 | 21.53486 | 0.068104 | 34.35 |
| 300331 | 2017 | -0.02 | 0.02 | 0.898381 | 0.80708752 | 21.33435 | 0.054652 | 22.22 |
| 2333   | 2017 | -0.28 | 0.02 | 0.898381 | 0.80708752 | 21.21152 | -0.02742 | 65.46 |
| 600105 | 2017 | -0.49 | 0.02 | 0.898381 | 0.80708752 | 22.27337 | 0.112394 | 36.46 |
| 603355 | 2017 | 0.027 | 0.02 | 0.898381 | 0.80708752 | 22.36569 | 0.112778 | 45.79 |
| 2426   | 2017 | 0.019 | 0.02 | 0.898381 | 0.80708752 | 23.64066 | 0.051329 | 27.69 |
| 551    | 2017 | 0.103 | 0.02 | 0.898381 | 0.80708752 | 22.16251 | 0.063595 | 34.33 |
| 2453   | 2017 | 0.545 | 0.02 | 0.898381 | 0.80708752 | 21.50973 | 0.014272 | 22.09 |
| 2453   | 2017 | 0.545 | 0.02 | 0.898381 | 0.80708752 | 21.50973 | 0.014272 | 22.09 |
| 603005 | 2017 | 1.342 | 0.02 | 0.898381 | 0.80708752 | 21.47243 | 0.053391 | 23.88 |
| 300128 | 2017 | 0.646 | 0.02 | 0.898381 | 0.80708752 | 22.08923 | 0.036384 | 21.3  |
| 2652   | 2017 | -0.1  | 0.02 | 0.898381 | 0.80708752 | 21.74434 | 0.142098 | 24.02 |
| 300500 | 2017 | -0.29 | 0.02 | 0.898381 | 0.80708752 | 20.74563 | 0.104764 | 48.47 |
| 551    | 2017 | 0.097 | 0.02 | 0.898381 | 0.80708752 | 22.16251 | 0.063595 | 34.33 |
| 603929 | 2017 | 0.662 | 0.02 | 0.898381 | 0.80708752 | 21.23183 | 0.128629 | 53.99 |
| 2081   | 2017 | 6E-04 | 0.02 | 0.898381 | 0.80708752 | 24.06203 | 0.163968 | 24.7  |
| 300416 | 2017 | 0.416 | 0.02 | 0.898381 | 0.80708752 | 20.56148 | 0.115307 | 47.77 |
| 300141 | 2017 | 1.153 | 0.02 | 0.898381 | 0.80708752 | 20.90468 | 0.012279 | 44.57 |
| 2519   | 2017 | 0.515 | 0.02 | 0.898381 | 0.80708752 | 22.36975 | 0.051506 | 30.35 |
| 2160   | 2017 | 0.127 | 0.02 | 0.898381 | 0.80708752 | 22.59904 | 0.051875 | 25.43 |
| 2333   | 2017 | -0.28 | 0.02 | 0.898381 | 0.80708752 | 21.21152 | -0.02742 | 65.46 |
| 2387   | 2017 | 1.19  | 0.02 | 0.898381 | 0.80708752 | 22.94218 | 0.019941 | 29.82 |
| 2089   | 2017 | -0.51 | 0.02 | 0.898381 | 0.80708752 | 22.25211 | -0.0484  | 18.05 |
| 300013 | 2017 | 0.875 | 0.02 | 0.898381 | 0.80708752 | 21.47695 | 0.103327 | 11.04 |
| 601700 | 2017 | 0.532 | 0.02 | 0.898381 | 0.80708752 | 22.2286  | 0.04624  | 29.24 |
| 300165 | 2017 | 0.655 | 0.02 | 0.898381 | 0.80708752 | 21.53486 | 0.068104 | 34.35 |
| 2808   | 2017 | 0.676 | 0.02 | 0.898381 | 0.80708752 | 20.24989 | 0.056283 | 39.52 |
| 603660 | 2017 | 2.291 | 0.02 | 0.898381 | 0.80708752 | 21.38935 | 0.194678 | 26.49 |
| 2426   | 2017 | -0.21 | 0.02 | 0.898381 | 0.80708752 | 23.64066 | 0.051329 | 27.69 |
| 2245   | 2017 | -0.13 | 0.02 | 0.898381 | 0.80708752 | 21.90274 | 0.146821 | 32.19 |

|        |      |       |      |          |            |          |          |       |
|--------|------|-------|------|----------|------------|----------|----------|-------|
| 2089   | 2017 | -0.45 | 0.02 | 0.898381 | 0.80708752 | 22.25211 | -0.0484  | 18.05 |
| 300128 | 2017 | -0.68 | 0.02 | 0.898381 | 0.80708752 | 22.08923 | 0.036384 | 21.3  |
| 2531   | 2017 | -0.07 | 0.02 | 0.898381 | 0.80708752 | 23.03212 | 0.096171 | 29.81 |
| 603800 | 2017 | -0.43 | 0.02 | 0.898381 | 0.80708752 | 21.07854 | 0.029097 | 39.15 |
| 300128 | 2017 | -0.41 | 0.02 | 0.898381 | 0.80708752 | 22.08923 | 0.036384 | 21.3  |
| 300128 | 2017 | -0.02 | 0.02 | 0.898381 | 0.80708752 | 22.08923 | 0.036384 | 21.3  |
| 2127   | 2017 | -0.27 | 0.02 | 0.898381 | 0.80708752 | 22.06365 | 0.175606 | 26.64 |
| 2333   | 2017 | -0.28 | 0.02 | 0.898381 | 0.80708752 | 21.21152 | -0.02742 | 65.46 |
| 300215 | 2017 | -0.3  | 0.02 | 0.898381 | 0.80708752 | 22.05619 | 0.063346 | 26.4  |
| 2450   | 2017 | 0.682 | 0.02 | 0.898381 | 0.80708752 | 24.25731 | 0.137323 | 24.06 |
| 300141 | 2017 | 1.153 | 0.02 | 0.898381 | 0.80708752 | 20.90468 | 0.012279 | 44.57 |
| 300393 | 2017 | 0.227 | 0.02 | 0.898381 | 0.80708752 | 22.54679 | 0.098697 | 36.71 |
| 603355 | 2017 | -0.53 | 0.02 | 0.898381 | 0.80708752 | 22.36569 | 0.112778 | 45.79 |
| 603355 | 2017 | -0.39 | 0.02 | 0.898381 | 0.80708752 | 22.36569 | 0.112778 | 45.79 |
| 2075   | 2017 | 0.071 | 0.02 | 0.898381 | 0.80708752 | 22.9908  | 0.230399 | 20.34 |
| 2453   | 2017 | 0.545 | 0.02 | 0.898381 | 0.80708752 | 21.50973 | 0.014272 | 22.09 |
| 300260 | 2017 | -0.67 | 0.02 | 0.898381 | 0.80708752 | 20.86493 | 0.031276 | 28.12 |
| 603017 | 2017 | -0.46 | 0.02 | 0.898381 | 0.80708752 | 21.78083 | 0.092444 | 36.85 |
| 2091   | 2017 | -0.98 | 0.02 | 0.898381 | 0.80708752 | 23.6555  | 0.126167 | 33.48 |
| 2450   | 2017 | 0.622 | 0.02 | 0.898381 | 0.80708752 | 24.25731 | 0.137323 | 24.06 |
| 300500 | 2017 | 0.104 | 0.02 | 0.898381 | 0.80708752 | 20.74563 | 0.104764 | 48.47 |
| 2245   | 2017 | -0.13 | 0.02 | 0.898381 | 0.80708752 | 22.59791 | 0.146821 | 32.19 |
| 2245   | 2017 | 0.712 | 0.02 | 0.898381 | 0.80708752 | 22.59791 | 0.146821 | 32.19 |
| 600487 | 2017 | 0.051 | 0.02 | 0.898381 | 0.80708752 | 24.06359 | 0.202103 | 19.93 |
| 551    | 2017 | 0.214 | 0.02 | 0.898381 | 0.80708752 | 22.16251 | 0.063595 | 34.33 |
| 600487 | 2017 | 0.02  | 0.02 | 0.898381 | 0.80708752 | 24.06359 | 0.202103 | 19.93 |
| 600487 | 2017 | 0.714 | 0.02 | 0.898381 | 0.80708752 | 24.06359 | 0.202103 | 19.93 |
| 600487 | 2017 | -0.17 | 0.02 | 0.898381 | 0.80708752 | 24.06359 | 0.202103 | 19.93 |
| 300325 | 2017 | -0.05 | 0.02 | 0.898381 | 0.80708752 | 22.22926 | 0.011566 | 38.48 |
| 300260 | 2017 | -0.67 | 0.02 | 0.898381 | 0.80708752 | 20.86493 | 0.031276 | 28.12 |
| 603828 | 2017 | 0.164 | 0.02 | 0.898381 | 0.80708752 | 21.80806 | 0.058275 | 37.61 |
| 2453   | 2017 | 0.545 | 0.02 | 0.898381 | 0.80708752 | 21.50973 | 0.014272 | 22.09 |
| 300500 | 2017 | -0.38 | 0.02 | 0.898381 | 0.80708752 | 20.74563 | 0.104764 | 48.47 |
| 300346 | 2017 | 1.764 | 0.02 | 0.898381 | 0.80708752 | 21.01996 | 0.028922 | 12.2  |
| 603660 | 2017 | 1.408 | 0.02 | 0.898381 | 0.80708752 | 21.38935 | 0.194678 | 26.49 |
| 2787   | 2017 | -0.18 | 0.02 | 0.898381 | 0.80708752 | 21.02609 | 0.092775 | 43.18 |
| 2367   | 2017 | -0.17 | 0.02 | 0.898381 | 0.80708752 | 22.44777 | 0.08674  | 44.96 |
| 600487 | 2017 | -0.32 | 0.02 | 0.898381 | 0.80708752 | 24.06359 | 0.202103 | 19.93 |
| 2091   | 2017 | 0.077 | 0.02 | 0.898381 | 0.80708752 | 23.6555  | 0.126167 | 33.48 |
| 300394 | 2017 | -0.26 | 0.02 | 0.898381 | 0.80708752 | 20.60609 | 0.135011 | 46.95 |
| 300215 | 2017 | -0.3  | 0.02 | 0.898381 | 0.80708752 | 22.05619 | 0.063346 | 26.4  |
| 2172   | 2017 | 0.414 | 0.02 | 0.898381 | 0.80708752 | 21.83876 | 0.095667 | 48.97 |
| 603828 | 2017 | 0.282 | 0.02 | 0.898381 | 0.80708752 | 21.99199 | 0.058275 | 37.61 |
| 300509 | 2017 | 0.339 | 0.02 | 0.898381 | 0.80708752 | 20.94205 | 0.098233 | 33    |
| 2290   | 2017 | -0.35 | 0.02 | 0.898381 | 0.80708752 | 21.89748 | 0.001963 | 29.49 |
| 2547   | 2017 | -0.35 | 0.02 | 0.898381 | 0.80708752 | 22.83976 | -0.1279  | 38.54 |
| 300013 | 2017 | 0.467 | 0.02 | 0.898381 | 0.80708752 | 21.47695 | 0.103327 | 11.04 |
| 2808   | 2017 | 0.676 | 0.02 | 0.898381 | 0.80708752 | 20.24989 | 0.056283 | 39.52 |
| 300382 | 2017 | 0.148 | 0.02 | 0.898381 | 0.80708752 | 21.052   | 0.123009 | 64.83 |
| 300416 | 2017 | 0.155 | 0.02 | 0.898381 | 0.80708752 | 20.7764  | 0.115307 | 47.77 |
| 600105 | 2017 | -0.49 | 0.02 | 0.898381 | 0.80708752 | 22.27337 | 0.112394 | 36.46 |
| 2255   | 2017 | 0.197 | 0.02 | 0.898381 | 0.80708752 | 22.6238  | 0.029746 | 13.4  |
| 2426   | 2017 | -0.26 | 0.02 | 0.898381 | 0.80708752 | 23.64066 | 0.051329 | 27.69 |
| 300013 | 2017 | 0.875 | 0.02 | 0.898381 | 0.80708752 | 21.47695 | 0.103327 | 11.04 |



|        |      |       |      |          |            |          |          |       |
|--------|------|-------|------|----------|------------|----------|----------|-------|
| 300013 | 2017 | 0.875 | 0.02 | 0.898381 | 0.80708752 | 21.47695 | 0.103327 | 11.04 |
| 600487 | 2017 | 0.162 | 0.02 | 0.898381 | 0.80708752 | 24.06359 | 0.202103 | 19.93 |
| 2453   | 2017 | 0.545 | 0.02 | 0.898381 | 0.80708752 | 21.50973 | 0.014272 | 22.09 |
| 603355 | 2017 | -0.36 | 0.02 | 0.898381 | 0.80708752 | 22.36569 | 0.112778 | 45.79 |
| 2426   | 2017 | 0.796 | 0.02 | 0.898381 | 0.80708752 | 23.64066 | 0.051329 | 27.69 |
| 2547   | 2017 | 0.655 | 0.02 | 0.898381 | 0.80708752 | 22.83976 | -0.1279  | 38.54 |
| 600105 | 2017 | 0.169 | 0.02 | 0.898381 | 0.80708752 | 22.27337 | 0.112394 | 36.46 |
| 2514   | 2017 | -0.41 | 0.02 | 0.898381 | 0.80708752 | 21.1921  | 0.046113 | 24.07 |
| 551    | 2017 | 0.214 | 0.02 | 0.898381 | 0.80708752 | 22.16251 | 0.063595 | 34.33 |
| 300292 | 2017 | -0.33 | 0.02 | 0.898381 | 0.80708752 | 21.98352 | 0.08317  | 23.55 |
| 300331 | 2017 | -0.05 | 0.02 | 0.898381 | 0.80708752 | 21.33435 | 0.054652 | 22.22 |
| 300215 | 2017 | -0.3  | 0.02 | 0.898381 | 0.80708752 | 22.05619 | 0.063346 | 26.4  |
| 2564   | 2017 | -0.14 | 0.02 | 0.898381 | 0.80708752 | 23.84063 | 0.101435 | 23.79 |
| 2808   | 2017 | 0.676 | 0.02 | 0.898381 | 0.80708752 | 20.24989 | 0.056283 | 39.52 |
| 2453   | 2017 | 0.545 | 0.02 | 0.898381 | 0.80708752 | 21.50973 | 0.014272 | 22.09 |
| 2564   | 2017 | -0.36 | 0.02 | 0.898381 | 0.80708752 | 23.84063 | 0.101435 | 23.79 |
| 2290   | 2017 | -0.35 | 0.02 | 0.898381 | 0.80708752 | 21.89748 | 0.001963 | 29.49 |
| 2491   | 2017 | 0.399 | 0.02 | 0.898381 | 0.80708752 | 22.88302 | 0.13249  | 36.9  |
| 2079   | 2017 | -0.05 | 0.02 | 0.898381 | 0.80708752 | 21.40687 | 0.091663 | 34.28 |
| 777    | 2017 | -0.57 | 0.02 | 0.898381 | 0.80708752 | 21.44899 | 0.031108 | 17.92 |
| 2514   | 2017 | -0.3  | 0.02 | 0.898381 | 0.80708752 | 21.1921  | 0.046113 | 24.07 |
| 300013 | 2017 | 0.875 | 0.02 | 0.898381 | 0.80708752 | 21.47695 | 0.103327 | 11.04 |
| 2631   | 2017 | -0.62 | 0.02 | 0.898381 | 0.80708752 | 21.52832 | 0.054996 | 54.86 |
| 551    | 2017 | 0.214 | 0.02 | 0.898381 | 0.80708752 | 22.16251 | 0.063595 | 34.33 |
| 2491   | 2017 | 0.296 | 0.02 | 0.898381 | 0.80708752 | 22.88302 | 0.13249  | 36.9  |
| 2384   | 2017 | -0.22 | 0.02 | 0.898381 | 0.80708752 | 23.81945 | 0.068071 | 18.41 |
| 2081   | 2017 | 0.017 | 0.02 | 0.898381 | 0.80708752 | 24.06203 | 0.163968 | 24.7  |
| 2531   | 2017 | -0.07 | 0.02 | 0.898381 | 0.80708752 | 23.03212 | 0.096171 | 29.81 |
| 2384   | 2017 | -0.22 | 0.02 | 0.898381 | 0.80708752 | 23.81945 | 0.068071 | 18.41 |
| 2426   | 2017 | -0.2  | 0.02 | 0.898381 | 0.80708752 | 23.64066 | 0.051329 | 27.69 |
| 600487 | 2017 | -0.28 | 0.02 | 0.898381 | 0.80708752 | 24.06359 | 0.202103 | 19.93 |
| 2547   | 2017 | -0.01 | 0.02 | 0.898381 | 0.80708752 | 22.83976 | -0.1279  | 38.54 |
| 2081   | 2017 | 0.167 | 0.02 | 0.898381 | 0.80708752 | 24.06203 | 0.163968 | 24.7  |
| 2290   | 2017 | 0.123 | 0.02 | 0.898381 | 0.80708752 | 21.89748 | 0.001963 | 29.49 |
| 300228 | 2017 | 0.695 | 0.02 | 0.898381 | 0.80708752 | 22.15978 | 0.027359 | 9.24  |
| 300165 | 2017 | 0.457 | 0.02 | 0.898381 | 0.80708752 | 21.53486 | 0.068104 | 34.35 |
| 2290   | 2017 | 0.303 | 0.02 | 0.898381 | 0.80708752 | 21.89748 | 0.001963 | 29.49 |
| 2631   | 2017 | -0.57 | 0.02 | 0.898381 | 0.80708752 | 21.52832 | 0.054996 | 54.86 |
| 2290   | 2017 | 0.299 | 0.02 | 0.898381 | 0.80708752 | 21.89748 | 0.001963 | 29.49 |
| 2519   | 2017 | -0.15 | 0.02 | 0.898381 | 0.80708752 | 22.36975 | 0.051506 | 30.35 |
| 2491   | 2017 | 0.245 | 0.02 | 0.898381 | 0.80708752 | 22.88302 | 0.13249  | 36.9  |
| 300128 | 2017 | -0.47 | 0.02 | 0.898381 | 0.80708752 | 22.08923 | 0.036384 | 21.3  |
| 551    | 2017 | 0.214 | 0.02 | 0.898381 | 0.80708752 | 22.16251 | 0.063595 | 34.33 |
| 2245   | 2017 | -0.45 | 0.02 | 0.898381 | 0.80708752 | 22.59791 | 0.146821 | 32.19 |
| 300261 | 2017 | 1.127 | 0.02 | 0.898381 | 0.80708752 | 21.88148 | 0.038095 | 35.8  |
| 2150   | 2017 | -0.64 | 0.02 | 0.898381 | 0.80708752 | 21.091   | 0.070406 | 38.32 |
| 2564   | 2017 | -0.14 | 0.02 | 0.898381 | 0.80708752 | 23.84063 | 0.101435 | 23.79 |
| 603990 | 2017 | 1.4   | 0.02 | 0.898381 | 0.80708752 | 20.28077 | 0.117825 | 16.96 |
| 2089   | 2017 | -0.39 | 0.02 | 0.898381 | 0.80708752 | 22.25211 | -0.0484  | 18.05 |
| 600105 | 2017 | 0.169 | 0.02 | 0.898381 | 0.80708752 | 22.27337 | 0.112394 | 36.46 |
| 300394 | 2017 | -0.1  | 0.02 | 0.898381 | 0.80708752 | 20.52261 | 0.135011 | 46.95 |
| 2255   | 2017 | 0.197 | 0.02 | 0.898381 | 0.80708752 | 22.34939 | 0.029746 | 13.4  |
| 600487 | 2017 | -0.08 | 0.02 | 0.898381 | 0.80708752 | 24.06359 | 0.202103 | 19.93 |
| 2450   | 2017 | 0.682 | 0.02 | 0.898381 | 0.80708752 | 24.25731 | 0.137323 | 24.06 |

|        |      |       |      |          |            |          |          |       |
|--------|------|-------|------|----------|------------|----------|----------|-------|
| 2079   | 2017 | -0.49 | 0.02 | 0.898381 | 0.80708752 | 21.40687 | 0.091663 | 34.28 |
| 2808   | 2017 | 0.676 | 0.02 | 0.898381 | 0.80708752 | 20.24989 | 0.056283 | 39.52 |
| 2089   | 2017 | -0.44 | 0.02 | 0.898381 | 0.80708752 | 22.25211 | -0.0484  | 18.05 |
| 2435   | 2017 | -0.18 | 0.02 | 0.898381 | 0.80708752 | 22.64267 | 0.061881 | 37.61 |
| 2333   | 2017 | -0.28 | 0.02 | 0.898381 | 0.80708752 | 21.21152 | -0.02742 | 65.46 |
| 2450   | 2017 | 0.18  | 0.02 | 0.898381 | 0.80708752 | 24.25731 | 0.137323 | 24.06 |
| 2367   | 2017 | 0.522 | 0.02 | 0.898381 | 0.80708752 | 22.32257 | 0.08674  | 44.96 |
| 603355 | 2017 | 0.027 | 0.02 | 0.898381 | 0.80708752 | 22.36569 | 0.112778 | 45.79 |
| 603828 | 2017 | 0.282 | 0.02 | 0.898381 | 0.80708752 | 21.99199 | 0.058275 | 37.61 |
| 300260 | 2017 | -0.67 | 0.02 | 0.898381 | 0.80708752 | 20.86493 | 0.031276 | 28.12 |
| 2787   | 2017 | -0.05 | 0.02 | 0.898381 | 0.80708752 | 21.02609 | 0.092775 | 43.18 |
| 2079   | 2017 | -0.32 | 0.02 | 0.898381 | 0.80708752 | 21.40687 | 0.091663 | 34.28 |
| 2426   | 2017 | -0.14 | 0.02 | 0.898381 | 0.80708752 | 23.64066 | 0.051329 | 27.69 |
| 300260 | 2017 | -0.67 | 0.02 | 0.898381 | 0.80708752 | 20.79168 | 0.031276 | 28.12 |
| 2547   | 2017 | 0.655 | 0.02 | 0.898381 | 0.80708752 | 22.83976 | -0.1279  | 38.54 |
| 300393 | 2017 | 0.308 | 0.02 | 0.898381 | 0.80708752 | 22.54679 | 0.098697 | 36.71 |
| 2564   | 2017 | 0.968 | 0.02 | 0.898381 | 0.80708752 | 22.77571 | 0.101435 | 23.79 |
| 300394 | 2017 | -0.2  | 0.02 | 0.898381 | 0.80708752 | 20.60609 | 0.135011 | 46.95 |
| 551    | 2017 | 0.214 | 0.02 | 0.898381 | 0.80708752 | 22.16251 | 0.063595 | 34.33 |
| 2547   | 2017 | -0.01 | 0.02 | 0.898381 | 0.80708752 | 22.83976 | -0.1279  | 38.54 |
| 603699 | 2017 | -0.8  | 0.02 | 0.898381 | 0.80708752 | 22.1646  | 0.07789  | 53.15 |
| 2367   | 2017 | -0.23 | 0.02 | 0.898381 | 0.80708752 | 22.44777 | 0.08674  | 44.96 |
| 2547   | 2017 | -0.4  | 0.02 | 0.898381 | 0.80708752 | 22.83976 | -0.1279  | 38.54 |
| 600487 | 2017 | -0.61 | 0.02 | 0.898381 | 0.80708752 | 24.06359 | 0.202103 | 19.93 |
| 551    | 2017 | -0.01 | 0.02 | 0.898381 | 0.80708752 | 22.16251 | 0.063595 | 34.33 |
| 2426   | 2017 | -0.35 | 0.02 | 0.898381 | 0.80708752 | 23.64066 | 0.051329 | 27.69 |
| 2160   | 2017 | 0.571 | 0.02 | 0.898381 | 0.80708752 | 22.59904 | 0.051875 | 25.43 |
| 300128 | 2017 | -0.08 | 0.02 | 0.898381 | 0.80708752 | 22.08923 | 0.036384 | 21.3  |
| 2491   | 2017 | 0.157 | 0.02 | 0.898381 | 0.80708752 | 22.88302 | 0.13249  | 36.9  |
| 2491   | 2017 | -0.47 | 0.02 | 0.898381 | 0.80708752 | 22.88302 | 0.13249  | 36.9  |
| 600487 | 2017 | -0.61 | 0.02 | 0.898381 | 0.80708752 | 24.06359 | 0.202103 | 19.93 |
| 600487 | 2017 | 0.051 | 0.02 | 0.898381 | 0.80708752 | 24.06359 | 0.202103 | 19.93 |
| 2519   | 2017 | -0.15 | 0.02 | 0.898381 | 0.80708752 | 22.36975 | 0.051506 | 30.35 |
| 300215 | 2017 | -0.3  | 0.02 | 0.898381 | 0.80708752 | 22.05619 | 0.063346 | 26.4  |
| 603660 | 2017 | 1.84  | 0.02 | 0.898381 | 0.80708752 | 21.38935 | 0.194678 | 26.49 |
| 2787   | 2017 | -0.19 | 0.02 | 0.898381 | 0.80708752 | 21.02609 | 0.092775 | 43.18 |
| 2491   | 2017 | 0.505 | 0.02 | 0.898381 | 0.80708752 | 22.88302 | 0.13249  | 36.9  |
| 2091   | 2017 | 0.077 | 0.02 | 0.898381 | 0.80708752 | 23.6555  | 0.126167 | 33.48 |
| 2089   | 2017 | -0.45 | 0.02 | 0.898381 | 0.80708752 | 22.25211 | -0.0484  | 18.05 |
| 2384   | 2017 | 0.116 | 0.02 | 0.898381 | 0.80708752 | 23.81945 | 0.068071 | 18.41 |
| 551    | 2017 | 0.087 | 0.02 | 0.898381 | 0.80708752 | 22.16251 | 0.063595 | 34.33 |
| 2519   | 2017 | -0.15 | 0.02 | 0.898381 | 0.80708752 | 22.36975 | 0.051506 | 30.35 |
| 300346 | 2017 | 1.94  | 0.02 | 0.898381 | 0.80708752 | 21.01996 | 0.028922 | 12.2  |
| 2079   | 2017 | -0.32 | 0.02 | 0.898381 | 0.80708752 | 21.40687 | 0.091663 | 34.28 |
| 2367   | 2017 | -0.12 | 0.02 | 0.898381 | 0.80708752 | 22.44777 | 0.08674  | 44.96 |
| 603660 | 2017 | 1.739 | 0.02 | 0.898381 | 0.80708752 | 21.38935 | 0.194678 | 26.49 |
| 2635   | 2017 | -0.11 | 0.02 | 0.898381 | 0.80708752 | 22.8887  | 0.057394 | 27.13 |
| 300331 | 2017 | 0.275 | 0.02 | 0.898381 | 0.80708752 | 21.33435 | 0.054652 | 22.22 |
| 2426   | 2017 | -0.22 | 0.02 | 0.898381 | 0.80708752 | 23.64066 | 0.051329 | 27.69 |
| 2435   | 2017 | -0.18 | 0.02 | 0.898381 | 0.80708752 | 22.64267 | 0.061881 | 37.61 |
| 2808   | 2017 | 0.095 | 0.02 | 0.898381 | 0.80708752 | 20.24989 | 0.056283 | 39.52 |
| 2547   | 2017 | -0.67 | 0.02 | 0.898381 | 0.80708752 | 22.83976 | -0.1279  | 38.54 |
| 300331 | 2017 | 0.214 | 0.02 | 0.898381 | 0.80708752 | 21.33435 | 0.054652 | 22.22 |
| 600736 | 2017 | -0.25 | 0.02 | 0.898381 | 0.80708752 | 23.99581 | 0.103817 | 40.57 |

|        |      |       |      |          |            |          |          |       |
|--------|------|-------|------|----------|------------|----------|----------|-------|
| 2547   | 2017 | -0.67 | 0.02 | 0.898381 | 0.80708752 | 22.83976 | -0.1279  | 38.54 |
| 601599 | 2017 | -0.97 | 0.02 | 0.898381 | 0.80708752 | 22.58117 | 0.115476 | 13.3  |
| 300393 | 2017 | 0.838 | 0.02 | 0.898381 | 0.80708752 | 22.54679 | 0.098697 | 36.71 |
| 600736 | 2017 | -0.39 | 0.02 | 0.898381 | 0.80708752 | 23.99581 | 0.103817 | 40.57 |
| 2514   | 2017 | -0.41 | 0.02 | 0.898381 | 0.80708752 | 21.1921  | 0.046113 | 24.07 |
| 300331 | 2017 | 0.349 | 0.02 | 0.898381 | 0.80708752 | 21.33435 | 0.054652 | 22.22 |
| 300292 | 2017 | 0.176 | 0.02 | 0.898381 | 0.80708752 | 21.98352 | 0.08317  | 23.55 |
| 603828 | 2017 | -0.09 | 0.02 | 0.898381 | 0.80708752 | 21.99199 | 0.058275 | 37.61 |
| 2384   | 2017 | 0.612 | 0.02 | 0.898381 | 0.80708752 | 23.48447 | 0.068071 | 18.41 |
| 2079   | 2017 | -0.32 | 0.02 | 0.898381 | 0.80708752 | 21.40687 | 0.091663 | 34.28 |
| 600736 | 2017 | 0.246 | 0.02 | 0.898381 | 0.80708752 | 23.99581 | 0.103817 | 40.57 |
| 2787   | 2017 | -0.05 | 0.02 | 0.898381 | 0.80708752 | 21.02609 | 0.092775 | 43.18 |
| 551    | 2017 | 0.214 | 0.02 | 0.898381 | 0.80708752 | 22.16251 | 0.063595 | 34.33 |
| 2564   | 2017 | -0.14 | 0.02 | 0.898381 | 0.80708752 | 23.84063 | 0.101435 | 23.79 |
| 2426   | 2017 | -0.53 | 0.02 | 0.898381 | 0.80708752 | 23.64066 | 0.051329 | 27.69 |
| 2491   | 2017 | 0.296 | 0.02 | 0.898381 | 0.80708752 | 22.88302 | 0.13249  | 36.9  |
| 2255   | 2017 | 0.119 | 0.02 | 0.898381 | 0.80708752 | 22.6238  | 0.029746 | 13.4  |
| 2426   | 2017 | 0.118 | 0.02 | 0.898381 | 0.80708752 | 23.64066 | 0.051329 | 27.69 |
| 300346 | 2017 | 1.94  | 0.02 | 0.898381 | 0.80708752 | 21.01996 | 0.028922 | 12.2  |
| 600105 | 2017 | -0.27 | 0.02 | 0.898381 | 0.80708752 | 21.91687 | 0.112394 | 36.46 |
| 2808   | 2017 | 0.676 | 0.02 | 0.898381 | 0.80708752 | 20.12124 | 0.056283 | 39.52 |
| 2091   | 2017 | 0.048 | 0.02 | 0.898381 | 0.80708752 | 23.6555  | 0.126167 | 33.48 |
| 600200 | 2017 | 0.57  | 0.02 | 0.898381 | 0.80708752 | 21.81962 | 0.046141 | 17.01 |
| 601700 | 2017 | 0.532 | 0.02 | 0.898381 | 0.80708752 | 22.2286  | 0.04624  | 29.24 |
| 600487 | 2017 | 0.162 | 0.02 | 0.898381 | 0.80708752 | 24.06359 | 0.202103 | 19.93 |
| 603005 | 2017 | 1.404 | 0.02 | 0.898381 | 0.80708752 | 21.47243 | 0.053391 | 23.88 |
| 300500 | 2017 | -0.21 | 0.02 | 0.898381 | 0.80708752 | 20.74563 | 0.104764 | 48.47 |
| 600487 | 2017 | 0.05  | 0.02 | 0.898381 | 0.80708752 | 24.06359 | 0.202103 | 19.93 |
| 2463   | 2017 | -0.6  | 0.02 | 0.898381 | 0.80708752 | 22.51374 | 0.058345 | 20.19 |
| 300215 | 2017 | -0.3  | 0.02 | 0.898381 | 0.80708752 | 22.04174 | 0.063346 | 26.4  |
| 2491   | 2017 | 0.296 | 0.02 | 0.898381 | 0.80708752 | 22.88302 | 0.13249  | 36.9  |
| 603928 | 2017 | 0.75  | 0.02 | 0.898381 | 0.80708752 | 21.07444 | 0.119241 | 28.17 |
| 2089   | 2017 | -0.45 | 0.02 | 0.898381 | 0.80708752 | 22.25211 | -0.0484  | 18.05 |
| 300013 | 2017 | 0.875 | 0.02 | 0.898381 | 0.80708752 | 21.47695 | 0.103327 | 11.04 |
| 603017 | 2017 | -0.28 | 0.02 | 0.898381 | 0.80708752 | 21.55088 | 0.092444 | 36.85 |
| 300500 | 2017 | -0.13 | 0.02 | 0.898381 | 0.80708752 | 20.66231 | 0.104764 | 48.47 |
| 300128 | 2017 | -0.68 | 0.02 | 0.898381 | 0.80708752 | 22.08923 | 0.036384 | 21.3  |
| 2531   | 2017 | -0.56 | 0.02 | 0.898381 | 0.80708752 | 23.03212 | 0.096171 | 29.81 |
| 2255   | 2017 | 0.876 | 0.02 | 0.898381 | 0.80708752 | 22.6238  | 0.029746 | 13.4  |
| 300500 | 2017 | 0.104 | 0.02 | 0.898381 | 0.80708752 | 20.74563 | 0.104764 | 48.47 |
| 300382 | 2017 | 0.096 | 0.02 | 0.898381 | 0.80708752 | 21.052   | 0.123009 | 64.83 |
| 300522 | 2017 | 0.42  | 0.02 | 0.898381 | 0.80708752 | 20.26869 | 0.090739 | 39.65 |
| 551    | 2017 | 0.094 | 0.02 | 0.898381 | 0.80708752 | 22.16251 | 0.063595 | 34.33 |
| 2309   | 2017 | -0.05 | 0.02 | 0.898381 | 0.80708752 | 24.18366 | 0.041465 | 34.86 |
| 2787   | 2017 | -0.18 | 0.02 | 0.898381 | 0.80708752 | 21.02609 | 0.092775 | 43.18 |
| 2150   | 2017 | 0.483 | 0.02 | 0.898381 | 0.80708752 | 21.091   | 0.070406 | 38.32 |
| 2631   | 2017 | -0.74 | 0.02 | 0.898381 | 0.80708752 | 21.52832 | 0.054996 | 54.86 |
| 300013 | 2017 | -0.45 | 0.02 | 0.898381 | 0.80708752 | 21.30871 | 0.103327 | 11.04 |
| 603699 | 2017 | -0.43 | 0.02 | 0.898381 | 0.80708752 | 22.1646  | 0.07789  | 53.15 |
| 2384   | 2017 | -0.55 | 0.02 | 0.898381 | 0.80708752 | 23.81945 | 0.068071 | 18.41 |
| 2091   | 2017 | 0.077 | 0.02 | 0.898381 | 0.80708752 | 23.6555  | 0.126167 | 33.48 |
| 2384   | 2017 | -0.26 | 0.02 | 0.898381 | 0.80708752 | 23.81945 | 0.068071 | 18.41 |
| 300261 | 2017 | 1.127 | 0.02 | 0.898381 | 0.80708752 | 21.88148 | 0.038095 | 35.8  |
| 601700 | 2017 | -0.13 | 0.02 | 0.898381 | 0.80708752 | 22.14661 | 0.04624  | 29.24 |

|        |      |       |      |          |            |          |          |       |
|--------|------|-------|------|----------|------------|----------|----------|-------|
| 2453   | 2017 | 0.545 | 0.02 | 0.898381 | 0.80708752 | 21.50973 | 0.014272 | 22.09 |
| 2635   | 2017 | 5E-05 | 0.02 | 0.898381 | 0.80708752 | 22.8887  | 0.057394 | 27.13 |
| 777    | 2017 | -0.57 | 0.02 | 0.898381 | 0.80708752 | 21.44899 | 0.031108 | 17.92 |
| 2127   | 2017 | -0.17 | 0.02 | 0.898381 | 0.80708752 | 22.06365 | 0.175606 | 26.64 |
| 601700 | 2017 | 0.532 | 0.02 | 0.898381 | 0.80708752 | 22.2286  | 0.04624  | 29.24 |
| 300292 | 2017 | 0.176 | 0.02 | 0.898381 | 0.80708752 | 21.98352 | 0.08317  | 23.55 |
| 603928 | 2017 | 0.75  | 0.02 | 0.898381 | 0.80708752 | 21.07444 | 0.119241 | 28.17 |
| 603355 | 2017 | -0.36 | 0.02 | 0.898381 | 0.80708752 | 22.36569 | 0.112778 | 45.79 |
| 2547   | 2017 | -0.4  | 0.02 | 0.898381 | 0.80708752 | 22.83976 | -0.1279  | 38.54 |
| 601700 | 2017 | -0.13 | 0.02 | 0.898381 | 0.80708752 | 22.14661 | 0.04624  | 29.24 |
| 300416 | 2017 | -0.03 | 0.02 | 0.898381 | 0.80708752 | 20.7764  | 0.115307 | 47.77 |
| 603660 | 2017 | 2.291 | 0.02 | 0.898381 | 0.80708752 | 21.32995 | 0.194678 | 26.49 |
| 300416 | 2017 | 0.416 | 0.02 | 0.898381 | 0.80708752 | 20.7764  | 0.115307 | 47.77 |
| 603017 | 2017 | -0.41 | 0.02 | 0.898381 | 0.80708752 | 21.78083 | 0.092444 | 36.85 |
| 2245   | 2017 | 0.049 | 0.02 | 0.898381 | 0.80708752 | 22.59791 | 0.146821 | 32.19 |
| 2081   | 2017 | -0.5  | 0.02 | 0.898381 | 0.80708752 | 23.76301 | 0.163968 | 24.7  |
| 2079   | 2017 | -0.32 | 0.02 | 0.898381 | 0.80708752 | 21.40687 | 0.091663 | 34.28 |
| 2309   | 2017 | 0.323 | 0.02 | 0.898381 | 0.80708752 | 24.18366 | 0.041465 | 34.86 |
| 2309   | 2017 | 0.026 | 0.02 | 0.898381 | 0.80708752 | 24.18366 | 0.041465 | 34.86 |
| 551    | 2017 | 0.214 | 0.02 | 0.898381 | 0.80708752 | 22.16251 | 0.063595 | 34.33 |
| 2290   | 2017 | 0.123 | 0.02 | 0.898381 | 0.80708752 | 21.89748 | 0.001963 | 29.49 |
| 601700 | 2017 | 0.09  | 0.02 | 0.898381 | 0.80708752 | 22.2286  | 0.04624  | 29.24 |
| 300128 | 2017 | 0.646 | 0.02 | 0.898381 | 0.80708752 | 21.63133 | 0.036384 | 21.3  |
| 2255   | 2017 | 0.119 | 0.02 | 0.898381 | 0.80708752 | 22.6238  | 0.029746 | 13.4  |
| 600487 | 2017 | 0.051 | 0.02 | 0.898381 | 0.80708752 | 24.06359 | 0.202103 | 19.93 |
| 300192 | 2017 | -0.51 | 0.02 | 0.898381 | 0.80708752 | 21.09152 | 0.006882 | 37.45 |
| 600105 | 2017 | 0.831 | 0.02 | 0.898381 | 0.80708752 | 22.27337 | 0.112394 | 36.46 |
| 2309   | 2017 | 0.026 | 0.02 | 0.898381 | 0.80708752 | 24.18366 | 0.041465 | 34.86 |
| 603017 | 2017 | -0.59 | 0.02 | 0.898381 | 0.80708752 | 21.78083 | 0.092444 | 36.85 |
| 2367   | 2017 | -0.01 | 0.02 | 0.898381 | 0.80708752 | 22.44777 | 0.08674  | 44.96 |
| 2426   | 2017 | -0.53 | 0.02 | 0.898381 | 0.80708752 | 23.64066 | 0.051329 | 27.69 |
| 601599 | 2017 | -0.97 | 0.02 | 0.898381 | 0.80708752 | 22.31963 | 0.115476 | 13.3  |
| 600105 | 2017 | 0.169 | 0.02 | 0.898381 | 0.80708752 | 22.27337 | 0.112394 | 36.46 |
| 300549 | 2017 | 0.023 | 0.02 | 0.898381 | 0.80708752 | 20.45478 | 0.151535 | 33.77 |
| 300509 | 2017 | 0.339 | 0.02 | 0.898381 | 0.80708752 | 20.94805 | 0.098233 | 33    |
| 2435   | 2017 | -0.18 | 0.02 | 0.898381 | 0.80708752 | 22.38872 | 0.061881 | 37.61 |
| 2450   | 2017 | 0.622 | 0.02 | 0.898381 | 0.80708752 | 24.25731 | 0.137323 | 24.06 |
| 2387   | 2017 | 1.19  | 0.02 | 0.898381 | 0.80708752 | 22.94218 | 0.019941 | 29.82 |
| 300228 | 2017 | -0.63 | 0.02 | 0.898381 | 0.80708752 | 21.90588 | 0.027359 | 9.24  |
| 2160   | 2017 | 0.836 | 0.02 | 0.898381 | 0.80708752 | 22.59904 | 0.051875 | 25.43 |
| 300261 | 2017 | 1.127 | 0.02 | 0.898381 | 0.80708752 | 21.88148 | 0.038095 | 35.8  |
| 300261 | 2017 | 1.127 | 0.02 | 0.898381 | 0.80708752 | 21.88148 | 0.038095 | 35.8  |
| 300128 | 2017 | -0.68 | 0.02 | 0.898381 | 0.80708752 | 22.08923 | 0.036384 | 21.3  |
| 2160   | 2017 | -0.09 | 0.02 | 0.898381 | 0.80708752 | 22.59904 | 0.051875 | 25.43 |
| 300261 | 2017 | 1.127 | 0.02 | 0.898381 | 0.80708752 | 21.88148 | 0.038095 | 35.8  |
| 300342 | 2017 | -0.44 | 0.02 | 0.898381 | 0.80708752 | 21.29335 | 0.13957  | 45.52 |
| 300342 | 2017 | -0.44 | 0.02 | 0.898381 | 0.80708752 | 21.32581 | 0.13957  | 45.52 |
| 300260 | 2017 | -0.67 | 0.02 | 0.898381 | 0.80708752 | 20.86493 | 0.031276 | 28.12 |
| 2491   | 2017 | 0.296 | 0.02 | 0.898381 | 0.80708752 | 22.88302 | 0.13249  | 36.9  |
| 300342 | 2017 | 0.197 | 0.02 | 0.898381 | 0.80708752 | 21.29335 | 0.13957  | 45.52 |
| 600487 | 2017 | -0.07 | 0.02 | 0.898381 | 0.80708752 | 24.06359 | 0.202103 | 19.93 |
| 2091   | 2017 | 0.077 | 0.02 | 0.898381 | 0.80708752 | 22.84546 | 0.126167 | 33.48 |
| 300393 | 2017 | -0.3  | 0.02 | 0.898381 | 0.80708752 | 22.54679 | 0.098697 | 36.71 |
| 600200 | 2017 | 0.57  | 0.02 | 0.898381 | 0.80708752 | 22.25681 | 0.046141 | 17.01 |

|        |      |       |      |          |            |          |          |       |
|--------|------|-------|------|----------|------------|----------|----------|-------|
| 2091   | 2017 | 0.342 | 0.02 | 0.898381 | 0.80708752 | 23.6555  | 0.126167 | 33.48 |
| 300228 | 2017 | -0.23 | 0.02 | 0.898381 | 0.80708752 | 22.15978 | 0.027359 | 9.24  |
| 551    | 2017 | 0.147 | 0.02 | 0.898381 | 0.80708752 | 21.14754 | 0.063595 | 34.33 |
| 603928 | 2017 | 0.75  | 0.02 | 0.898381 | 0.80708752 | 21.07334 | 0.119241 | 28.17 |
| 2384   | 2017 | 0.116 | 0.02 | 0.898381 | 0.80708752 | 23.81945 | 0.068071 | 18.41 |
| 777    | 2017 | -0.57 | 0.02 | 0.898381 | 0.80708752 | 21.44899 | 0.031108 | 17.92 |
| 300141 | 2017 | 1.153 | 0.02 | 0.898381 | 0.80708752 | 20.90468 | 0.012279 | 44.57 |
| 300342 | 2017 | 0.15  | 0.02 | 0.898381 | 0.80708752 | 21.29335 | 0.13957  | 45.52 |
| 603699 | 2017 | -0.8  | 0.02 | 0.898381 | 0.80708752 | 22.1646  | 0.07789  | 53.15 |
| 600105 | 2017 | -0.36 | 0.02 | 0.898381 | 0.80708752 | 22.27337 | 0.112394 | 36.46 |
| 2081   | 2017 | -0.14 | 0.02 | 0.898381 | 0.80708752 | 24.06203 | 0.163968 | 24.7  |
| 600736 | 2017 | -0.39 | 0.02 | 0.898381 | 0.80708752 | 23.99581 | 0.103817 | 40.57 |
| 2808   | 2017 | 0.676 | 0.02 | 0.898381 | 0.80708752 | 20.24989 | 0.056283 | 39.52 |
| 300346 | 2017 | 1.764 | 0.02 | 0.898381 | 0.80708752 | 21.01996 | 0.028922 | 12.2  |
| 300346 | 2017 | 1.737 | 0.02 | 0.898381 | 0.80708752 | 21.01996 | 0.028922 | 12.2  |
| 551    | 2017 | 0.056 | 0.02 | 0.898381 | 0.80708752 | 22.16251 | 0.063595 | 34.33 |
| 300013 | 2017 | 0.634 | 0.02 | 0.898381 | 0.80708752 | 21.47695 | 0.103327 | 11.04 |
| 300292 | 2017 | -0.11 | 0.02 | 0.898381 | 0.80708752 | 21.79175 | 0.08317  | 23.55 |
| 2450   | 2017 | -0.04 | 0.02 | 0.898381 | 0.80708752 | 23.77687 | 0.137323 | 24.06 |
| 300013 | 2017 | 0.875 | 0.02 | 0.898381 | 0.80708752 | 21.47695 | 0.103327 | 11.04 |
| 2547   | 2017 | -0.4  | 0.02 | 0.898381 | 0.80708752 | 22.83976 | -0.1279  | 38.54 |
| 2531   | 2017 | 0.107 | 0.02 | 0.898381 | 0.80708752 | 23.03212 | 0.096171 | 29.81 |
| 300346 | 2017 | 1.764 | 0.02 | 0.898381 | 0.80708752 | 21.01996 | 0.028922 | 12.2  |
| 2255   | 2017 | -0.45 | 0.02 | 0.898381 | 0.80708752 | 22.6238  | 0.029746 | 13.4  |
| 300325 | 2017 | 0.92  | 0.02 | 0.898381 | 0.80708752 | 22.22926 | 0.011566 | 38.48 |
| 300416 | 2017 | 0.28  | 0.02 | 0.898381 | 0.80708752 | 20.7764  | 0.115307 | 47.77 |
| 300331 | 2017 | 0.349 | 0.02 | 0.898381 | 0.80708752 | 21.2032  | 0.054652 | 22.22 |
| 2367   | 2017 | 0.075 | 0.02 | 0.898381 | 0.80708752 | 22.44777 | 0.08674  | 44.96 |
| 2426   | 2017 | 0.575 | 0.02 | 0.898381 | 0.80708752 | 23.64066 | 0.051329 | 27.69 |
| 300331 | 2017 | 0.047 | 0.02 | 0.898381 | 0.80708752 | 21.33435 | 0.054652 | 22.22 |
| 600736 | 2017 | -0.39 | 0.02 | 0.898381 | 0.80708752 | 23.99581 | 0.103817 | 40.57 |
| 300228 | 2017 | -0.27 | 0.02 | 0.898381 | 0.80708752 | 22.15978 | 0.027359 | 9.24  |
| 2635   | 2017 | 0.001 | 0.02 | 0.898381 | 0.80708752 | 22.8887  | 0.057394 | 27.13 |
| 2309   | 2017 | -0.31 | 0.02 | 0.898381 | 0.80708752 | 24.18366 | 0.041465 | 34.86 |
| 2564   | 2017 | -0.14 | 0.02 | 0.898381 | 0.80708752 | 23.84063 | 0.101435 | 23.79 |
| 300141 | 2017 | 1.153 | 0.02 | 0.898381 | 0.80708752 | 20.90468 | 0.012279 | 44.57 |
| 300165 | 2017 | 0.707 | 0.02 | 0.898381 | 0.80708752 | 21.53486 | 0.068104 | 34.35 |
| 300522 | 2017 | 0.704 | 0.02 | 0.898381 | 0.80708752 | 20.26869 | 0.090739 | 39.65 |
| 2426   | 2017 | 0.299 | 0.02 | 0.898381 | 0.80708752 | 23.64066 | 0.051329 | 27.69 |
| 777    | 2017 | -0.57 | 0.02 | 0.898381 | 0.80708752 | 21.44899 | 0.031108 | 17.92 |
| 300390 | 2017 | 0.098 | 0.02 | 0.898381 | 0.80708752 | 20.75229 | 0.040884 | 34.75 |
| 300013 | 2017 | 0.875 | 0.02 | 0.898381 | 0.80708752 | 21.47695 | 0.103327 | 11.04 |
| 603928 | 2017 | 0.75  | 0.02 | 0.898381 | 0.80708752 | 21.07444 | 0.119241 | 28.17 |
| 2160   | 2017 | 0.571 | 0.02 | 0.898381 | 0.80708752 | 22.59904 | 0.051875 | 25.43 |
| 551    | 2017 | 0.214 | 0.02 | 0.898381 | 0.80708752 | 22.16251 | 0.063595 | 34.33 |
| 2547   | 2017 | -0.4  | 0.02 | 0.898381 | 0.80708752 | 22.83976 | -0.1279  | 38.54 |
| 300522 | 2017 | 1.082 | 0.02 | 0.898381 | 0.80708752 | 20.26869 | 0.090739 | 39.65 |
| 2463   | 2017 | 0.058 | 0.02 | 0.898381 | 0.80708752 | 22.51374 | 0.058345 | 20.19 |
| 777    | 2017 | -0.57 | 0.02 | 0.898381 | 0.80708752 | 21.42785 | 0.031108 | 17.92 |
| 2387   | 2017 | 1.019 | 0.02 | 0.898381 | 0.80708752 | 22.94218 | 0.019941 | 29.82 |
| 600200 | 2017 | 0.57  | 0.02 | 0.898381 | 0.80708752 | 22.25681 | 0.046141 | 17.01 |
| 2150   | 2017 | 0.483 | 0.02 | 0.898381 | 0.80708752 | 21.091   | 0.070406 | 38.32 |
| 300228 | 2017 | 0.695 | 0.02 | 0.898381 | 0.80708752 | 22.15978 | 0.027359 | 9.24  |
| 600487 | 2017 | -0    | 0.02 | 0.898381 | 0.80708752 | 24.06359 | 0.202103 | 19.93 |

|        |      |       |      |          |            |          |          |       |
|--------|------|-------|------|----------|------------|----------|----------|-------|
| 300416 | 2017 | -0.03 | 0.02 | 0.898381 | 0.80708752 | 20.7764  | 0.115307 | 47.77 |
| 2519   | 2017 | 0.224 | 0.02 | 0.898381 | 0.80708752 | 22.2634  | 0.051506 | 30.35 |
| 2631   | 2017 | -0.62 | 0.02 | 0.898381 | 0.80708752 | 21.52832 | 0.054996 | 54.86 |
| 300228 | 2017 | -0.63 | 0.02 | 0.898381 | 0.80708752 | 22.15978 | 0.027359 | 9.24  |
| 300325 | 2017 | 0.92  | 0.02 | 0.898381 | 0.80708752 | 22.09019 | 0.011566 | 38.48 |
| 2519   | 2017 | 0.736 | 0.02 | 0.898381 | 0.80708752 | 22.36975 | 0.051506 | 30.35 |
| 300522 | 2017 | 0.42  | 0.02 | 0.898381 | 0.80708752 | 20.24982 | 0.090739 | 39.65 |
| 300165 | 2017 | 0.096 | 0.02 | 0.898381 | 0.80708752 | 21.53486 | 0.068104 | 34.35 |
| 2463   | 2017 | 0.058 | 0.02 | 0.898381 | 0.80708752 | 22.51374 | 0.058345 | 20.19 |
| 2426   | 2017 | 0.021 | 0.02 | 0.898381 | 0.80708752 | 23.64066 | 0.051329 | 27.69 |
| 2160   | 2017 | 0.836 | 0.02 | 0.898381 | 0.80708752 | 22.59904 | 0.051875 | 25.43 |
| 603699 | 2017 | -0.68 | 0.02 | 0.898381 | 0.80708752 | 22.13218 | 0.07789  | 53.15 |
| 2514   | 2017 | 0.174 | 0.02 | 0.898381 | 0.80708752 | 21.1921  | 0.046113 | 24.07 |
| 600105 | 2017 | 0.169 | 0.02 | 0.898381 | 0.80708752 | 22.27337 | 0.112394 | 36.46 |
| 600736 | 2017 | -0.25 | 0.02 | 0.898381 | 0.80708752 | 23.15061 | 0.103817 | 40.57 |
| 300390 | 2017 | -0.13 | 0.02 | 0.898381 | 0.80708752 | 20.75229 | 0.040884 | 34.75 |
| 2631   | 2017 | -0.62 | 0.02 | 0.898381 | 0.80708752 | 21.52832 | 0.054996 | 54.86 |
| 300382 | 2017 | 0.169 | 0.02 | 0.898381 | 0.80708752 | 21.052   | 0.123009 | 64.83 |
| 300416 | 2017 | 0.261 | 0.02 | 0.898381 | 0.80708752 | 20.7764  | 0.115307 | 47.77 |
| 2453   | 2017 | 0.545 | 0.02 | 0.898381 | 0.80708752 | 21.50973 | 0.014272 | 22.09 |
| 600200 | 2017 | 0.57  | 0.02 | 0.898381 | 0.80708752 | 22.25681 | 0.046141 | 17.01 |
| 2384   | 2017 | -0.55 | 0.02 | 0.898381 | 0.80708752 | 23.81945 | 0.068071 | 18.41 |
| 300013 | 2017 | 0.634 | 0.02 | 0.898381 | 0.80708752 | 21.47695 | 0.103327 | 11.04 |
| 300390 | 2017 | 0.665 | 0.02 | 0.898381 | 0.80708752 | 20.75229 | 0.040884 | 34.75 |
| 2514   | 2017 | -0.3  | 0.02 | 0.898381 | 0.80708752 | 21.1921  | 0.046113 | 24.07 |
| 603800 | 2017 | -0.43 | 0.02 | 0.898381 | 0.80708752 | 21.07854 | 0.029097 | 39.15 |
| 2547   | 2017 | -0.23 | 0.02 | 0.898381 | 0.80708752 | 22.83976 | -0.1279  | 38.54 |
| 300393 | 2017 | -0.49 | 0.02 | 0.898381 | 0.80708752 | 22.54679 | 0.098697 | 36.71 |
| 2652   | 2017 | -0.24 | 0.02 | 0.898381 | 0.80708752 | 21.74434 | 0.142098 | 24.02 |
| 300211 | 2017 | 0.255 | 0.02 | 0.898381 | 0.80708752 | 20.17458 | 0.007301 | 48.4  |
| 2491   | 2017 | 0.296 | 0.02 | 0.898381 | 0.80708752 | 22.88302 | 0.13249  | 36.9  |
| 2635   | 2017 | 0.087 | 0.02 | 0.898381 | 0.80708752 | 22.8887  | 0.057394 | 27.13 |
| 600487 | 2017 | -0.2  | 0.02 | 0.898381 | 0.80708752 | 24.06359 | 0.202103 | 19.93 |
| 300325 | 2017 | 0.209 | 0.02 | 0.898381 | 0.80708752 | 22.22926 | 0.011566 | 38.48 |
| 2075   | 2017 | 0.071 | 0.02 | 0.898381 | 0.80708752 | 22.9908  | 0.230399 | 20.34 |
| 300292 | 2017 | 0.328 | 0.02 | 0.898381 | 0.80708752 | 21.98352 | 0.08317  | 23.55 |
| 2309   | 2017 | -0.09 | 0.02 | 0.898381 | 0.80708752 | 23.36572 | 0.041465 | 34.86 |
| 300261 | 2017 | 1.127 | 0.02 | 0.898381 | 0.80708752 | 21.88148 | 0.038095 | 35.8  |
| 2564   | 2017 | -0.36 | 0.02 | 0.898381 | 0.80708752 | 23.84063 | 0.101435 | 23.79 |
| 300228 | 2017 | 0.067 | 0.02 | 0.898381 | 0.80708752 | 22.15978 | 0.027359 | 9.24  |
| 300549 | 2017 | 0.023 | 0.02 | 0.898381 | 0.80708752 | 20.45478 | 0.151535 | 33.77 |
| 300394 | 2017 | -0.26 | 0.02 | 0.898381 | 0.80708752 | 20.60609 | 0.135011 | 46.95 |
| 300394 | 2017 | -0.16 | 0.02 | 0.898381 | 0.80708752 | 20.60609 | 0.135011 | 46.95 |
| 300394 | 2017 | -0.26 | 0.02 | 0.898381 | 0.80708752 | 20.60609 | 0.135011 | 46.95 |
| 601599 | 2017 | -0.97 | 0.02 | 0.898381 | 0.80708752 | 22.58117 | 0.115476 | 13.3  |
| 300500 | 2017 | 0.104 | 0.02 | 0.898381 | 0.80708752 | 20.74563 | 0.104764 | 48.47 |
| 2255   | 2017 | 0.153 | 0.02 | 0.898381 | 0.80708752 | 22.6238  | 0.029746 | 13.4  |
| 300192 | 2017 | -0.51 | 0.02 | 0.898381 | 0.80708752 | 21.25526 | 0.006882 | 37.45 |
| 551    | 2017 | -0.12 | 0.02 | 0.898381 | 0.80708752 | 22.16251 | 0.063595 | 34.33 |
| 300292 | 2017 | 0.176 | 0.02 | 0.898381 | 0.80708752 | 21.98352 | 0.08317  | 23.55 |
| 300261 | 2017 | 1.127 | 0.02 | 0.898381 | 0.80708752 | 21.60707 | 0.038095 | 35.8  |
| 2255   | 2017 | 0.119 | 0.02 | 0.898381 | 0.80708752 | 22.6238  | 0.029746 | 13.4  |
| 600736 | 2017 | -0.39 | 0.02 | 0.898381 | 0.80708752 | 23.99581 | 0.103817 | 40.57 |
| 603800 | 2017 | -0.43 | 0.02 | 0.898381 | 0.80708752 | 21.07854 | 0.029097 | 39.15 |

|        |      |       |      |          |            |          |          |       |
|--------|------|-------|------|----------|------------|----------|----------|-------|
| 603660 | 2017 | 1.859 | 0.02 | 0.898381 | 0.80708752 | 21.38935 | 0.194678 | 26.49 |
| 2547   | 2017 | 0.103 | 0.02 | 0.898381 | 0.80708752 | 22.83976 | -0.1279  | 38.54 |
| 2150   | 2017 | -0.6  | 0.02 | 0.898381 | 0.80708752 | 21.091   | 0.070406 | 38.32 |
| 2150   | 2017 | -0.84 | 0.02 | 0.898381 | 0.80708752 | 21.091   | 0.070406 | 38.32 |
| 603660 | 2017 | 1.913 | 0.02 | 0.898381 | 0.80708752 | 21.32995 | 0.194678 | 26.49 |
| 2453   | 2017 | 0.545 | 0.02 | 0.898381 | 0.80708752 | 21.50973 | 0.014272 | 22.09 |
| 300228 | 2017 | 0.067 | 0.02 | 0.898381 | 0.80708752 | 22.15978 | 0.027359 | 9.24  |
| 603800 | 2017 | -0.43 | 0.02 | 0.898381 | 0.80708752 | 21.07854 | 0.029097 | 39.15 |
| 300292 | 2017 | 0.067 | 0.02 | 0.898381 | 0.80708752 | 21.98352 | 0.08317  | 23.55 |
| 2491   | 2017 | 0.856 | 0.02 | 0.898381 | 0.80708752 | 22.75766 | 0.13249  | 36.9  |
| 2075   | 2017 | 0.071 | 0.02 | 0.898381 | 0.80708752 | 21.68232 | 0.230399 | 20.34 |
| 300013 | 2017 | 0.875 | 0.02 | 0.898381 | 0.80708752 | 21.47695 | 0.103327 | 11.04 |
| 2089   | 2017 | -0.49 | 0.02 | 0.898381 | 0.80708752 | 22.25211 | -0.0484  | 18.05 |
| 300382 | 2017 | 0.241 | 0.02 | 0.898381 | 0.80708752 | 21.052   | 0.123009 | 64.83 |
| 2081   | 2017 | 0.704 | 0.02 | 0.898381 | 0.80708752 | 24.06203 | 0.163968 | 24.7  |
| 2091   | 2017 | 0.077 | 0.02 | 0.898381 | 0.80708752 | 23.6555  | 0.126167 | 33.48 |
| 2255   | 2017 | 0.119 | 0.02 | 0.898381 | 0.80708752 | 22.6238  | 0.029746 | 13.4  |
| 601599 | 2017 | -0.97 | 0.02 | 0.898381 | 0.80708752 | 22.58117 | 0.115476 | 13.3  |
| 603699 | 2017 | 0.088 | 0.02 | 0.898381 | 0.80708752 | 22.1646  | 0.07789  | 53.15 |
| 2255   | 2017 | 0.213 | 0.02 | 0.898381 | 0.80708752 | 22.6238  | 0.029746 | 13.4  |
| 603017 | 2017 | 0.074 | 0.02 | 0.898381 | 8.07E-01   | 21.78083 | 0.092444 | 36.85 |
| 603660 | 2017 | 2.061 | 0.02 | 0.898381 | 8.07E-01   | 21.38935 | 0.194678 | 26.49 |
| 2564   | 2017 | -0.14 | 0.02 | 0.898381 | 8.07E-01   | 23.84063 | 0.101435 | 23.79 |
| 300141 | 2017 | 1.153 | 0.02 | 0.898381 | 8.07E-01   | 20.90468 | 0.012279 | 44.57 |
| 300165 | 2017 | 0.096 | 0.02 | 0.898381 | 8.07E-01   | 21.53486 | 0.068104 | 34.35 |
| 600487 | 2017 | -0.08 | 0.02 | 0.898381 | 8.07E-01   | 24.06359 | 0.202103 | 19.93 |
| 300331 | 2017 | 0.349 | 0.02 | 0.898381 | 8.07E-01   | 21.33435 | 0.054652 | 22.22 |
| 2367   | 2017 | -0.23 | 0.02 | 0.898381 | 8.07E-01   | 22.44777 | 0.08674  | 44.96 |
| 300416 | 2017 | -0.03 | 0.02 | 0.898381 | 0.80708752 | 20.7764  | 0.115307 | 47.77 |
| 2367   | 2017 | 0.089 | 0.02 | 0.898381 | 0.80708752 | 22.44777 | 0.08674  | 44.96 |
| 2245   | 2017 | -0.13 | 0.02 | 0.898381 | 0.80708752 | 22.59791 | 0.146821 | 32.19 |
| 2081   | 2017 | -0.14 | 0.02 | 0.898381 | 0.80708752 | 24.06203 | 0.163968 | 24.7  |
| 2635   | 2017 | -0.17 | 0.02 | 0.898381 | 0.80708752 | 22.8887  | 0.057394 | 27.13 |
| 603355 | 2017 | -0    | 0.02 | 0.898381 | 0.80708752 | 22.36569 | 0.112778 | 45.79 |
| 2547   | 2017 | 0.103 | 0.02 | 0.898381 | 0.80708752 | 22.83976 | -0.1279  | 38.54 |
| 2079   | 2017 | -0.32 | 0.02 | 0.898381 | 0.80708752 | 21.2741  | 0.091663 | 34.28 |
| 2808   | 2017 | -0.44 | 0.02 | 0.898381 | 0.80708752 | 20.24989 | 0.056283 | 39.52 |
| 2079   | 2017 | -0.25 | 0.02 | 0.898381 | 0.80708752 | 21.40687 | 0.091663 | 34.28 |
| 300215 | 2017 | -0.3  | 0.02 | 0.898381 | 0.80708752 | 22.05619 | 0.063346 | 26.4  |
| 603017 | 2017 | -0.59 | 0.02 | 0.898381 | 0.80708752 | 21.78083 | 0.092444 | 36.85 |
| 300292 | 2017 | 0.176 | 0.02 | 0.898381 | 0.80708752 | 21.98352 | 0.08317  | 23.55 |
| 2309   | 2017 | -0.37 | 0.02 | 0.898381 | 0.80708752 | 24.18366 | 0.041465 | 34.86 |
| 2384   | 2017 | -0.22 | 0.02 | 0.898381 | 0.80708752 | 23.81945 | 0.068071 | 18.41 |
| 2245   | 2017 | -0.37 | 0.02 | 0.898381 | 0.80708752 | 22.59791 | 0.146821 | 32.19 |
| 603660 | 2017 | 1.739 | 0.02 | 0.898381 | 0.80708752 | 21.38935 | 0.194678 | 26.49 |
| 2387   | 2017 | 1.19  | 0.02 | 0.898381 | 0.80708752 | 22.94218 | 0.019941 | 29.82 |
| 2367   | 2017 | -0.14 | 0.02 | 0.898381 | 0.80708752 | 22.44777 | 0.08674  | 44.96 |
| 300342 | 2017 | 0.197 | 0.02 | 0.898381 | 0.80708752 | 21.29335 | 0.13957  | 45.52 |
| 551    | 2017 | -0.28 | 0.02 | 0.898381 | 0.80708752 | 22.16251 | 0.063595 | 34.33 |
| 2384   | 2017 | -0.22 | 0.02 | 0.898381 | 0.80708752 | 23.81945 | 0.068071 | 18.41 |
| 300325 | 2017 | -0.4  | 0.02 | 0.898381 | 0.80708752 | 22.22926 | 0.011566 | 38.48 |
| 300393 | 2017 | -0.49 | 0.02 | 0.898381 | 0.80708752 | 22.54679 | 0.098697 | 36.71 |
| 2367   | 2017 | 0.522 | 0.02 | 0.898381 | 0.80708752 | 22.44777 | 0.08674  | 44.96 |
| 2384   | 2017 | -0.4  | 0.02 | 0.898381 | 0.80708752 | 23.81945 | 0.068071 | 18.41 |

|        |      |       |      |          |            |          |          |       |
|--------|------|-------|------|----------|------------|----------|----------|-------|
| 2631   | 2017 | 0.585 | 0.02 | 0.898381 | 0.80708752 | 21.52832 | 0.054996 | 54.86 |
| 600200 | 2017 | 0.57  | 0.02 | 0.898381 | 0.80708752 | 22.25681 | 0.046141 | 17.01 |
| 2172   | 2017 | -0.03 | 0.02 | 0.898381 | 0.80708752 | 21.83876 | 0.095667 | 48.97 |
| 300141 | 2017 | 1.153 | 0.02 | 0.898381 | 0.80708752 | 20.90468 | 0.012279 | 44.57 |
| 300390 | 2017 | 0.665 | 0.02 | 0.898381 | 0.80708752 | 20.75229 | 0.040884 | 34.75 |
| 777    | 2017 | -0.57 | 0.02 | 0.898381 | 0.80708752 | 21.44899 | 0.031108 | 17.92 |
| 551    | 2017 | 0.214 | 0.02 | 0.898381 | 0.80708752 | 22.16251 | 0.063595 | 34.33 |
| 300165 | 2017 | 0.726 | 0.02 | 0.898381 | 0.80708752 | 21.53486 | 0.068104 | 34.35 |
| 2309   | 2017 | 0.286 | 0.02 | 0.898381 | 0.80708752 | 24.18366 | 0.041465 | 34.86 |
| 2367   | 2017 | 0.089 | 0.02 | 0.898381 | 0.80708752 | 22.44777 | 0.08674  | 44.96 |
| 601599 | 2017 | -0.97 | 0.02 | 0.898381 | 0.80708752 | 22.58117 | 0.115476 | 13.3  |
| 2635   | 2017 | -0.17 | 0.02 | 0.898381 | 0.80708752 | 22.8887  | 0.057394 | 27.13 |
| 2387   | 2017 | 1.019 | 0.02 | 0.898381 | 0.80708752 | 20.98029 | 0.019941 | 29.82 |
| 603699 | 2017 | 0.088 | 0.02 | 0.898381 | 0.80708752 | 22.1646  | 0.07789  | 53.15 |
| 300013 | 2017 | 0.875 | 0.02 | 0.898381 | 0.80708752 | 21.47695 | 0.103327 | 11.04 |
| 603017 | 2017 | 0.074 | 0.02 | 0.898381 | 0.80708752 | 21.78083 | 0.092444 | 36.85 |
| 2808   | 2017 | -0.44 | 0.02 | 0.898381 | 0.80708752 | 20.24989 | 0.056283 | 39.52 |
| 601700 | 2017 | 0.532 | 0.02 | 0.898381 | 0.80708752 | 22.14661 | 0.04624  | 29.24 |
| 2127   | 2017 | -0.15 | 0.02 | 0.898381 | 0.80708752 | 22.06365 | 0.175606 | 26.64 |
| 300165 | 2017 | 0.726 | 0.02 | 0.898381 | 0.80708752 | 21.53486 | 0.068104 | 34.35 |
| 2160   | 2017 | -0.09 | 0.02 | 0.898381 | 0.80708752 | 22.44367 | 0.051875 | 25.43 |
| 551    | 2017 | 0.214 | 0.02 | 0.898381 | 0.80708752 | 22.16251 | 0.063595 | 34.33 |
| 2531   | 2017 | -0.13 | 0.02 | 0.898381 | 0.80708752 | 23.03212 | 0.096171 | 29.81 |
| 300390 | 2017 | 0.665 | 0.02 | 0.898381 | 0.80708752 | 20.56818 | 0.040884 | 34.75 |
| 603929 | 2017 | 0.662 | 0.02 | 0.898381 | 0.80708752 | 21.23183 | 0.128629 | 53.99 |
| 2631   | 2017 | -0.62 | 0.02 | 0.898381 | 0.80708752 | 21.52832 | 0.054996 | 54.86 |
| 300260 | 2017 | -0.67 | 0.02 | 0.898381 | 0.80708752 | 20.86493 | 0.031276 | 28.12 |
| 2426   | 2017 | 0.406 | 0.02 | 0.898381 | 0.80708752 | 23.64066 | 0.051329 | 27.69 |
| 2491   | 2017 | 0.296 | 0.02 | 0.898381 | 0.80708752 | 22.88302 | 0.13249  | 36.9  |
| 300522 | 2017 | 1.082 | 0.02 | 0.898381 | 0.80708752 | 20.26869 | 0.090739 | 39.65 |
| 2808   | 2017 | -0.44 | 0.02 | 0.898381 | 0.80708752 | 20.24989 | 0.056283 | 39.52 |
| 603005 | 2017 | 1.39  | 0.02 | 0.898381 | 0.80708752 | 21.47243 | 0.053391 | 23.88 |
| 300394 | 2017 | -0.26 | 0.02 | 0.898381 | 0.80708752 | 20.60609 | 0.135011 | 46.95 |
| 300141 | 2017 | 1.153 | 0.02 | 0.898381 | 0.80708752 | 20.56985 | 0.012279 | 44.57 |
| 300325 | 2017 | -0.4  | 0.02 | 0.898381 | 0.80708752 | 22.22926 | 0.011566 | 38.48 |
| 2564   | 2017 | 0.004 | 0.02 | 0.898381 | 0.80708752 | 23.84063 | 0.101435 | 23.79 |
| 300390 | 2017 | -0.13 | 0.02 | 0.898381 | 0.80708752 | 20.75229 | 0.040884 | 34.75 |
| 603660 | 2017 | 1.84  | 0.02 | 0.898381 | 0.80708752 | 21.38935 | 0.194678 | 26.49 |
| 551    | 2017 | -0.45 | 0.02 | 0.898381 | 0.80708752 | 22.16251 | 0.063595 | 34.33 |
| 603017 | 2017 | 0.074 | 0.02 | 0.898381 | 0.80708752 | 21.78083 | 0.092444 | 36.85 |
| 2079   | 2017 | -0.32 | 0.02 | 0.898381 | 0.80708752 | 21.40687 | 0.091663 | 34.28 |
| 2255   | 2017 | 0.008 | 0.02 | 0.898381 | 0.80708752 | 22.6238  | 0.029746 | 13.4  |
| 2150   | 2017 | -0.84 | 0.02 | 0.898381 | 0.80708752 | 20.84997 | 0.070406 | 38.32 |
| 603828 | 2017 | -0.19 | 0.02 | 0.898381 | 0.80708752 | 21.99199 | 0.058275 | 37.61 |
| 300394 | 2017 | -0.26 | 0.02 | 0.898381 | 0.80708752 | 20.60609 | 0.135011 | 46.95 |
| 2081   | 2017 | 0.1   | 0.02 | 0.898381 | 0.80708752 | 24.06203 | 0.163968 | 24.7  |
| 600736 | 2017 | -0.39 | 0.02 | 0.898381 | 0.80708752 | 23.99581 | 0.103817 | 40.57 |
| 2531   | 2017 | -0.11 | 0.02 | 0.898381 | 0.80708752 | 22.58643 | 0.096171 | 29.81 |
| 2514   | 2017 | -0.01 | 0.02 | 0.898381 | 0.80708752 | 21.1921  | 0.046113 | 24.07 |
| 2426   | 2017 | 0.184 | 0.02 | 0.898381 | 0.80708752 | 23.64066 | 0.051329 | 27.69 |
| 300260 | 2017 | -0.67 | 0.02 | 0.898381 | 0.80708752 | 20.86493 | 0.031276 | 28.12 |
| 2519   | 2017 | 0.206 | 0.02 | 0.898381 | 0.80708752 | 22.36975 | 0.051506 | 30.35 |
| 2463   | 2017 | 0.058 | 0.02 | 0.898381 | 0.80708752 | 22.51374 | 0.058345 | 20.19 |
| 300509 | 2017 | 0.365 | 0.02 | 0.898381 | 0.80708752 | 20.94205 | 0.098233 | 33    |



|        |      |       |      |          |            |          |          |       |
|--------|------|-------|------|----------|------------|----------|----------|-------|
| 2081   | 2017 | 0.222 | 0.02 | 0.898381 | 0.80708752 | 24.06203 | 0.163968 | 24.7  |
| 300325 | 2017 | 0.92  | 0.02 | 0.898381 | 0.80708752 | 22.22926 | 0.011566 | 38.48 |
| 2426   | 2017 | -0.53 | 0.02 | 0.898381 | 0.80708752 | 23.64066 | 0.051329 | 27.69 |
| 2426   | 2017 | -0.13 | 0.02 | 0.898381 | 0.80708752 | 23.64066 | 0.051329 | 27.69 |
| 2127   | 2017 | -0.27 | 0.02 | 0.898381 | 0.80708752 | 22.06365 | 0.175606 | 26.64 |
| 600487 | 2017 | 0.017 | 0.02 | 0.898381 | 0.80708752 | 23.51999 | 0.202103 | 19.93 |
| 300416 | 2017 | -0.03 | 0.02 | 0.898381 | 0.80708752 | 20.7764  | 0.115307 | 47.77 |
| 600105 | 2017 | -0.36 | 0.02 | 0.898381 | 0.80708752 | 22.27337 | 0.112394 | 36.46 |
| 600487 | 2017 | -0.02 | 0.02 | 0.898381 | 0.80708752 | 24.06359 | 0.202103 | 19.93 |
| 300394 | 2017 | -0.26 | 0.02 | 0.898381 | 0.80708752 | 20.60609 | 0.135011 | 46.95 |
| 2652   | 2017 | -0.1  | 0.02 | 0.898381 | 0.80708752 | 21.74434 | 0.142098 | 24.02 |
| 603005 | 2017 | 1.404 | 0.02 | 0.898381 | 0.80708752 | 21.48595 | 0.053391 | 23.88 |
| 2787   | 2017 | -0.19 | 0.02 | 0.898381 | 0.80708752 | 21.02609 | 0.092775 | 43.18 |
| 600736 | 2017 | -0.39 | 0.02 | 0.898381 | 0.80708752 | 23.99581 | 0.103817 | 40.57 |
| 300228 | 2017 | 0.695 | 0.02 | 0.898381 | 0.80708752 | 22.15978 | 0.027359 | 9.24  |
| 603828 | 2017 | -0.06 | 0.02 | 0.898381 | 0.80708752 | 21.99199 | 0.058275 | 37.61 |
| 300165 | 2017 | 0.096 | 0.02 | 0.898381 | 0.80708752 | 21.38486 | 0.068104 | 34.35 |
| 2290   | 2017 | 0.311 | 0.02 | 0.898381 | 0.80708752 | 21.62236 | 0.001963 | 29.49 |
| 2547   | 2017 | -0.67 | 0.02 | 0.898381 | 0.80708752 | 22.83976 | -0.1279  | 38.54 |
| 2075   | 2017 | 0.071 | 0.02 | 0.898381 | 0.80708752 | 22.9908  | 0.230399 | 20.34 |
| 300228 | 2017 | -0.14 | 0.02 | 0.898381 | 0.80708752 | 22.15978 | 0.027359 | 9.24  |
| 600487 | 2017 | 0.295 | 0.02 | 0.898381 | 0.80708752 | 24.06359 | 0.202103 | 19.93 |
| 2309   | 2017 | -0.07 | 0.02 | 0.898381 | 0.80708752 | 24.18366 | 0.041465 | 34.86 |
| 2564   | 2017 | -0.25 | 0.02 | 0.898381 | 0.80708752 | 23.84063 | 0.101435 | 23.79 |
| 2519   | 2017 | 0.517 | 0.02 | 0.898381 | 0.80708752 | 22.36975 | 0.051506 | 30.35 |
| 2631   | 2017 | -0.43 | 0.02 | 0.898381 | 0.80708752 | 21.52832 | 0.054996 | 54.86 |
| 2089   | 2017 | -0.5  | 0.02 | 0.898381 | 0.80708752 | 22.25211 | -0.0484  | 18.05 |
| 600105 | 2017 | -0.49 | 0.02 | 0.898381 | 0.80708752 | 22.27337 | 0.112394 | 36.46 |
| 2426   | 2017 | -0.53 | 0.02 | 0.898381 | 0.80708752 | 23.64066 | 0.051329 | 27.69 |
| 2079   | 2017 | 0.834 | 0.02 | 0.898381 | 0.80708752 | 21.40687 | 0.091663 | 34.28 |
| 2531   | 2017 | -0.04 | 0.02 | 0.898381 | 0.80708752 | 23.03212 | 0.096171 | 29.81 |
| 2245   | 2017 | -0.13 | 0.02 | 0.898381 | 0.80708752 | 22.59791 | 0.146821 | 32.19 |
| 2127   | 2017 | -0.27 | 0.02 | 0.898381 | 0.80708752 | 22.22699 | 0.175606 | 26.64 |
| 2367   | 2017 | 0.043 | 0.02 | 0.898381 | 0.80708752 | 22.44777 | 0.08674  | 44.96 |
| 603990 | 2017 | 1.4   | 0.02 | 0.898381 | 0.80708752 | 20.25566 | 0.117825 | 16.96 |
| 2387   | 2017 | 1.166 | 0.02 | 0.898381 | 0.80708752 | 22.94218 | 0.019941 | 29.82 |
| 637    | 2017 | -0.47 | 0.02 | 0.934309 | 0.87293408 | 20.91314 | 0.118999 | 29.5  |
| 637    | 2017 | -0.47 | 0.02 | 0.934309 | 0.87293408 | 20.51367 | 0.118999 | 29.5  |
| 637    | 2017 | -0.47 | 0.02 | 0.934309 | 0.87293408 | 20.91314 | 0.118999 | 29.5  |
| 600566 | 2017 | 0.598 | 0.03 | 1.29541  | 1.6780869  | 22.61977 | 0.278056 | 51.48 |
| 600703 | 2017 | 0.522 | 0.03 | 1.29541  | 1.6780869  | 23.95156 | 0.160024 | 29.76 |
| 600566 | 2017 | 0.598 | 0.03 | 1.29541  | 1.6780869  | 22.61977 | 0.278056 | 51.48 |
| 600703 | 2017 | -0.04 | 0.03 | 1.29541  | 1.6780869  | 23.95156 | 0.160024 | 29.76 |
| 600566 | 2017 | 0.598 | 0.03 | 1.29541  | 1.6780869  | 22.61977 | 0.278056 | 51.48 |
| 600703 | 2017 | 0.354 | 0.03 | 1.29541  | 1.6780869  | 23.95156 | 0.160024 | 29.76 |
| 300395 | 2017 | -0.35 | 0.03 | 1.29541  | 1.6780869  | 20.87577 | 0.134418 | 12.98 |
| 300395 | 2017 | -0.35 | 0.03 | 1.29541  | 1.6780869  | 20.87577 | 0.134418 | 12.98 |
| 600260 | 2017 | -0.11 | 0.03 | 1.29541  | 1.6780869  | 23.64741 | 0.157543 | 23.29 |
| 553    | 2017 | 0.459 | 0.03 | 1.29541  | 1.6780869  | 24.40245 | 0.082324 | 74.18 |
| 600566 | 2017 | 0.598 | 0.03 | 1.29541  | 1.6780869  | 22.61977 | 0.278056 | 51.48 |
| 600566 | 2017 | 0.598 | 0.03 | 1.29541  | 1.6780869  | 22.61977 | 0.278056 | 51.48 |
| 300395 | 2017 | 0.531 | 0.03 | 1.29541  | 1.6780869  | 20.82793 | 0.134418 | 12.98 |
| 600703 | 2017 | 0.382 | 0.03 | 1.29541  | 1.6780869  | 23.95156 | 0.160024 | 29.76 |
| 600260 | 2017 | -0.27 | 0.03 | 1.29541  | 1.6780869  | 23.64741 | 0.157543 | 23.29 |

|        |      |       |      |          |           |          |          |       |
|--------|------|-------|------|----------|-----------|----------|----------|-------|
| 760    | 2017 | 0.909 | 0.03 | 1.29541  | 1.6780869 | 21.44416 | -0.09361 | 14.91 |
| 300395 | 2017 | -0.35 | 0.03 | 1.29541  | 1.6780869 | 20.87577 | 0.134418 | 12.98 |
| 600703 | 2017 | 0.579 | 0.03 | 1.29541  | 1.6780869 | 23.95156 | 0.160024 | 29.76 |
| 600703 | 2017 | 0.363 | 0.03 | 1.29541  | 1.6780869 | 23.95156 | 0.160024 | 29.76 |
| 553    | 2017 | 0.459 | 0.03 | 1.29541  | 1.6780869 | 23.74862 | 0.082324 | 74.18 |
| 760    | 2017 | 0.909 | 0.03 | 1.29541  | 1.6780869 | 21.60132 | -0.09361 | 14.91 |
| 600260 | 2017 | -0.15 | 0.03 | 1.29541  | 1.6780869 | 23.64741 | 0.157543 | 23.29 |
| 600260 | 2017 | 5E-04 | 0.03 | 1.29541  | 1.6780869 | 23.64741 | 0.157543 | 23.29 |
| 600703 | 2017 | -0.38 | 0.03 | 1.29541  | 1.6780869 | 23.95156 | 0.160024 | 29.76 |
| 600260 | 2017 | -0.39 | 0.03 | 1.29541  | 1.6780869 | 23.64741 | 0.157543 | 23.29 |
| 760    | 2017 | 0.909 | 0.03 | 1.29541  | 1.6780869 | 21.60132 | -0.09361 | 14.91 |
| 600703 | 2017 | -0.38 | 0.03 | 1.29541  | 1.6780869 | 23.95156 | 0.160024 | 29.76 |
| 600703 | 2017 | 0.701 | 0.03 | 1.29541  | 1.6780869 | 23.95156 | 0.160024 | 29.76 |
| 553    | 2017 | 0.459 | 0.03 | 1.29541  | 1.6780869 | 24.40245 | 0.082324 | 74.18 |
| 600260 | 2017 | -0.11 | 0.03 | 1.29541  | 1.6780869 | 23.64741 | 0.157543 | 23.29 |
| 600260 | 2017 | -0.11 | 0.03 | 1.29541  | 1.6780869 | 23.64741 | 0.157543 | 23.29 |
| 600260 | 2017 | 0.936 | 0.03 | 1.29541  | 1.6780869 | 23.64741 | 0.157543 | 23.29 |
| 600260 | 2017 | -0.15 | 0.03 | 1.29541  | 1.6780869 | 23.64741 | 0.157543 | 23.29 |
| 600703 | 2017 | -0.38 | 0.03 | 1.29541  | 1.6780869 | 23.95156 | 0.160024 | 29.76 |
| 600260 | 2017 | -0.11 | 0.03 | 1.29541  | 1.6780869 | 23.64741 | 0.157543 | 23.29 |
| 600566 | 2017 | 0.598 | 0.03 | 1.29541  | 1.6780869 | 22.61977 | 0.278056 | 51.48 |
| 600566 | 2017 | 0.598 | 0.03 | 1.29541  | 1.6780869 | 22.61977 | 0.278056 | 51.48 |
| 600260 | 2017 | 0.406 | 0.03 | 1.29541  | 1.6780869 | 23.48825 | 0.157543 | 23.29 |
| 600566 | 2017 | 0.598 | 0.03 | 1.29541  | 1.6780869 | 22.61977 | 0.278056 | 51.48 |
| 600703 | 2017 | -0.38 | 0.03 | 1.29541  | 1.6780869 | 23.95156 | 0.160024 | 29.76 |
| 600566 | 2017 | 0.598 | 0.03 | 1.29541  | 1.6780869 | 22.94037 | 0.278056 | 51.48 |
| 600703 | 2017 | 0.122 | 0.03 | 1.29541  | 1.6780869 | 23.95156 | 0.160024 | 29.76 |
| 600260 | 2017 | -0.39 | 0.03 | 1.29541  | 1.6780869 | 23.64741 | 0.157543 | 23.29 |
| 600566 | 2017 | 0.598 | 0.03 | 1.29541  | 1.6780869 | 22.61977 | 0.278056 | 51.48 |
| 600703 | 2017 | 0.35  | 0.03 | 1.29541  | 1.6780869 | 23.45552 | 0.160024 | 29.76 |
| 300395 | 2017 | 0.178 | 0.03 | 1.29541  | 1.6780869 | 20.87577 | 0.134418 | 12.98 |
| 600703 | 2017 | -0.38 | 0.03 | 1.29541  | 1.6780869 | 23.95156 | 0.160024 | 29.76 |
| 300395 | 2017 | 0.531 | 0.03 | 1.29541  | 1.6780869 | 20.87577 | 0.134418 | 12.98 |
| 627    | 2017 | 0.484 | 0.03 | 0.245123 | 0.0600851 | 25.66788 | 0.100292 | 37    |
| 821    | 2017 | -0.09 | 0.03 | 0.245123 | 0.0600851 | 21.83259 | 0.082833 | 26.42 |
| 2783   | 2017 | -0.15 | 0.03 | 0.245123 | 0.0600851 | 21.59552 | 0.083372 | 16.72 |
| 627    | 2017 | -0.01 | 0.03 | 0.245123 | 0.0600851 | 23.5069  | 0.100292 | 37    |
| 2783   | 2017 | -0.66 | 0.03 | 0.245123 | 0.0600851 | 21.59552 | 0.083372 | 16.72 |
| 902    | 2017 | -0.52 | 0.03 | 0.245123 | 0.0600851 | 22.89177 | 0.118522 | 47.53 |
| 821    | 2017 | -0.05 | 0.03 | 0.245123 | 0.0600851 | 21.83259 | 0.082833 | 26.42 |
| 627    | 2017 | -0.84 | 0.03 | 0.245123 | 0.0600851 | 25.66788 | 0.100292 | 37    |
| 821    | 2017 | -0.09 | 0.03 | 0.245123 | 0.0600851 | 21.69915 | 0.082833 | 26.42 |
| 2783   | 2017 | -0.27 | 0.03 | 0.245123 | 0.0600851 | 21.59552 | 0.083372 | 16.72 |
| 2783   | 2017 | -0.15 | 0.03 | 0.245123 | 0.0600851 | 21.33568 | 0.083372 | 16.72 |
| 2783   | 2017 | -0.16 | 0.03 | 0.245123 | 0.0600851 | 21.59552 | 0.083372 | 16.72 |
| 627    | 2017 | -0.84 | 0.03 | 0.245123 | 0.0600851 | 25.66788 | 0.100292 | 37    |
| 2783   | 2017 | -0.66 | 0.03 | 0.245123 | 0.0600851 | 21.59552 | 0.083372 | 16.72 |
| 821    | 2017 | -0.17 | 0.03 | 0.245123 | 0.0600851 | 21.83259 | 0.082833 | 26.42 |
| 627    | 2017 | -0.01 | 0.03 | 0.245123 | 0.0600851 | 25.66788 | 0.100292 | 37    |
| 902    | 2017 | -0.52 | 0.03 | 0.245123 | 0.0600851 | 22.89177 | 0.118522 | 47.53 |
| 902    | 2017 | -0.52 | 0.03 | 0.245123 | 0.0600851 | 22.89177 | 0.118522 | 47.53 |
| 2783   | 2017 | -0.27 | 0.03 | 0.245123 | 0.0600851 | 21.59552 | 0.083372 | 16.72 |
| 627    | 2017 | -0.01 | 0.03 | 0.245123 | 0.0600851 | 25.66788 | 0.100292 | 37    |
| 2783   | 2017 | 0.669 | 0.03 | 0.245123 | 0.0600851 | 21.59552 | 0.083372 | 16.72 |

|        |      |       |      |          |            |          |          |       |
|--------|------|-------|------|----------|------------|----------|----------|-------|
| 902    | 2017 | -0.52 | 0.03 | 0.245123 | 0.0600851  | 22.89177 | 0.118522 | 47.53 |
| 821    | 2017 | -0.05 | 0.03 | 0.245123 | 0.0600851  | 21.83259 | 0.082833 | 26.42 |
| 821    | 2017 | -0.06 | 0.03 | 0.245123 | 0.0600851  | 21.83259 | 0.082833 | 26.42 |
| 627    | 2017 | -0.84 | 0.03 | 0.245123 | 0.0600851  | 25.66788 | 0.100292 | 37    |
| 821    | 2017 | -0.49 | 0.03 | 0.245123 | 0.0600851  | 21.83259 | 0.082833 | 26.42 |
| 821    | 2017 | -0.27 | 0.03 | 0.245123 | 0.0600851  | 21.83259 | 0.082833 | 26.42 |
| 902    | 2017 | -0.52 | 0.03 | 0.245123 | 0.0600851  | 22.50301 | 0.118522 | 47.53 |
| 821    | 2017 | -0.09 | 0.03 | 0.245123 | 0.0600851  | 21.83259 | 0.082833 | 26.42 |
| 902    | 2017 | -0.52 | 0.03 | 0.245123 | 0.0600851  | 22.89177 | 0.118522 | 47.53 |
| 821    | 2017 | -0.49 | 0.03 | 0.245123 | 0.0600851  | 21.83259 | 0.082833 | 26.42 |
| 821    | 2017 | -0.15 | 0.03 | 0.245123 | 0.0600851  | 21.83259 | 0.082833 | 26.42 |
| 2783   | 2017 | -0.35 | 0.03 | 0.245123 | 0.0600851  | 21.59552 | 0.083372 | 16.72 |
| 603737 | 2017 | -0.67 | 0.03 | 0.04596  | 0.00211236 | 21.46003 | 0.157255 | 65.61 |
| 2217   | 2017 | -0.6  | 0.03 | 0.04596  | 0.00211236 | 23.77936 | 0.115952 | 19.72 |
| 2217   | 2017 | -0.13 | 0.03 | 0.04596  | 0.00211236 | 23.77936 | 0.115952 | 19.72 |
| 2217   | 2017 | -0.2  | 0.03 | 0.04596  | 0.00211236 | 23.77936 | 0.115952 | 19.72 |
| 2217   | 2017 | -0.6  | 0.03 | 0.04596  | 0.00211236 | 23.77936 | 0.115952 | 19.72 |
| 2217   | 2017 | -0.11 | 0.03 | 0.04596  | 0.00211236 | 23.77936 | 0.115952 | 19.72 |
| 2217   | 2017 | -0.6  | 0.03 | 0.04596  | 0.00211236 | 23.77936 | 0.115952 | 19.72 |
| 2217   | 2017 | -0.6  | 0.03 | 0.04596  | 0.00211236 | 23.77936 | 0.115952 | 19.72 |
| 2217   | 2017 | 0.338 | 0.03 | 0.04596  | 0.00211236 | 23.11192 | 0.115952 | 19.72 |
| 2217   | 2017 | -0.23 | 0.03 | 0.04596  | 0.00211236 | 23.77936 | 0.115952 | 19.72 |
| 2217   | 2017 | 0.284 | 0.03 | 0.04596  | 0.00211236 | 23.77936 | 0.115952 | 19.72 |
| 603737 | 2017 | -0.67 | 0.03 | 0.04596  | 0.00211236 | 21.46003 | 0.157255 | 65.61 |
| 2217   | 2017 | -0.6  | 0.03 | 0.04596  | 0.00211236 | 23.77936 | 0.115952 | 19.72 |
| 603737 | 2017 | -0.67 | 0.03 | 0.04596  | 0.00211236 | 21.46003 | 0.157255 | 65.61 |
| 2217   | 2017 | 0.034 | 0.03 | 0.04596  | 0.00211236 | 23.77936 | 0.115952 | 19.72 |
| 2217   | 2017 | -0.22 | 0.03 | 0.04596  | 0.00211236 | 23.77936 | 0.115952 | 19.72 |
| 2217   | 2017 | -0.33 | 0.03 | 0.04596  | 0.00211236 | 23.77936 | 0.115952 | 19.72 |
| 603737 | 2017 | -0.67 | 0.03 | 0.04596  | 0.00211236 | 21.31483 | 0.157255 | 65.61 |
| 603737 | 2017 | -0.67 | 0.03 | 0.04596  | 0.00211236 | 21.46003 | 0.157255 | 65.61 |
| 2217   | 2017 | 0.725 | 0.03 | 0.04596  | 0.00211236 | 23.77936 | 0.115952 | 19.72 |
| 2217   | 2017 | -0.6  | 0.03 | 0.04596  | 0.00211236 | 23.77936 | 0.115952 | 19.72 |
| 2217   | 2017 | -0.21 | 0.03 | 0.04596  | 0.00211236 | 23.77936 | 0.115952 | 19.72 |
| 818    | 2017 | -0.89 | 0    | 0.090064 | 0.00811147 | 21.93198 | 0.10064  | 28.66 |
| 751    | 2017 | 0.335 | 0    | 0.090064 | 0.00811147 | 22.14879 | 0.09102  | 23.59 |
| 818    | 2017 | -0.89 | 0    | 0.090064 | 0.00811147 | 22.05886 | 0.10064  | 28.66 |
| 751    | 2017 | 0.335 | 0    | 0.090064 | 0.00811147 | 22.14884 | 0.09102  | 23.59 |
| 818    | 2017 | -0.89 | 0    | 0.090064 | 0.00811147 | 21.93198 | 0.10064  | 28.66 |
| 818    | 2017 | -0.89 | 0    | 0.090064 | 0.00811147 | 21.93198 | 0.10064  | 28.66 |
| 818    | 2017 | -0.89 | 0    | 0.090064 | 0.00811147 | 21.93198 | 0.10064  | 28.66 |
| 818    | 2017 | -0.89 | 0    | 0.090064 | 0.00811147 | 21.93198 | 0.10064  | 28.66 |
| 818    | 2017 | -0.89 | 0    | 0.090064 | 0.00811147 | 21.93198 | 0.10064  | 28.66 |
| 818    | 2017 | -0.89 | 0    | 0.090064 | 0.00811147 | 21.93198 | 0.10064  | 28.66 |
| 818    | 2017 | -0.89 | 0    | 0.090064 | 0.00811147 | 21.93198 | 0.10064  | 28.66 |
| 751    | 2017 | 0.335 | 0    | 0.090064 | 0.00811147 | 22.14879 | 0.09102  | 23.59 |
| 600502 | 2017 | -0.27 | 0.04 | 0.060161 | 0.0036194  | 24.87442 | 0.088419 | 32.32 |
| 2005   | 2017 | 0.095 | 0.04 | 0.060161 | 0.0036194  | 23.27894 | -0.14972 | 16.57 |
| 600552 | 2017 | -0.38 | 0.04 | 0.060161 | 0.0036194  | 22.38461 | 0.041277 | 21.74 |
| 2005   | 2017 | -0.32 | 0.04 | 0.060161 | 0.0036194  | 23.35829 | -0.14972 | 16.57 |
| 930    | 2017 | -0.32 | 0.04 | 0.060161 | 0.0036194  | 22.50765 | 0.127292 | 15.76 |
| 2005   | 2017 | -0.57 | 0.04 | 0.060161 | 0.0036194  | 23.35829 | -0.14972 | 16.57 |
| 2005   | 2017 | -0.57 | 0.04 | 0.060161 | 0.0036194  | 23.35829 | -0.14972 | 16.57 |
| 2005   | 2017 | -0.1  | 0.04 | 0.060161 | 0.0036194  | 23.35829 | -0.14972 | 16.57 |
| 2005   | 2017 | -0.09 | 0.04 | 0.060161 | 0.0036194  | 23.35829 | -0.14972 | 16.57 |

|        |      |       |      |          |           |          |          |       |
|--------|------|-------|------|----------|-----------|----------|----------|-------|
| 930    | 2017 | 0.371 | 0.04 | 0.060161 | 0.0036194 | 22.50765 | 0.127292 | 15.76 |
| 2005   | 2017 | -0.57 | 0.04 | 0.060161 | 0.0036194 | 23.35829 | -0.14972 | 16.57 |
| 2005   | 2017 | 0.757 | 0.04 | 0.060161 | 0.0036194 | 23.35829 | -0.14972 | 16.57 |
| 2005   | 2017 | -0.21 | 0.04 | 0.060161 | 0.0036194 | 23.35829 | -0.14972 | 16.57 |
| 930    | 2017 | -0.23 | 0.04 | 0.060161 | 0.0036194 | 22.4132  | 0.127292 | 15.76 |
| 2005   | 2017 | -0.57 | 0.04 | 0.060161 | 0.0036194 | 23.35829 | -0.14972 | 16.57 |
| 2005   | 2017 | -0.44 | 0.04 | 0.060161 | 0.0036194 | 23.35829 | -0.14972 | 16.57 |
| 600502 | 2017 | 0.083 | 0.04 | 0.060161 | 0.0036194 | 24.87442 | 0.088419 | 32.32 |
| 930    | 2017 | 0.568 | 0.04 | 0.060161 | 0.0036194 | 22.50765 | 0.127292 | 15.76 |
| 2005   | 2017 | -0.57 | 0.04 | 0.060161 | 0.0036194 | 23.35829 | -0.14972 | 16.57 |
| 600552 | 2017 | 0.028 | 0.04 | 0.060161 | 0.0036194 | 22.38461 | 0.041277 | 21.74 |
| 600552 | 2017 | -0.71 | 0.04 | 0.060161 | 0.0036194 | 22.38461 | 0.041277 | 21.74 |
| 600552 | 2017 | 0.285 | 0.04 | 0.060161 | 0.0036194 | 22.38461 | 0.041277 | 21.74 |
| 2005   | 2017 | -0.51 | 0.04 | 0.060161 | 0.0036194 | 23.35829 | -0.14972 | 16.57 |
| 600502 | 2017 | -0.8  | 0.04 | 0.060161 | 0.0036194 | 24.87442 | 0.088419 | 32.32 |
| 600502 | 2017 | 0.525 | 0.04 | 0.060161 | 3.62E-03  | 24.87442 | 0.088419 | 32.32 |
| 2005   | 2017 | 0.757 | 0.04 | 0.060161 | 3.62E-03  | 23.35829 | -0.14972 | 16.57 |
| 600502 | 2017 | 0.083 | 0.04 | 0.060161 | 3.62E-03  | 24.87442 | 0.088419 | 32.32 |
| 600552 | 2017 | -0.2  | 0.04 | 0.060161 | 3.62E-03  | 22.38461 | 0.041277 | 21.74 |
| 600552 | 2017 | -0.05 | 0.04 | 0.060161 | 3.62E-03  | 22.38461 | 0.041277 | 21.74 |
| 2005   | 2017 | -0.57 | 0.04 | 0.060161 | 3.62E-03  | 23.35829 | -0.14972 | 16.57 |
| 600552 | 2017 | 0.024 | 0.04 | 0.060161 | 0.0036194 | 22.38461 | 0.041277 | 21.74 |
| 600502 | 2017 | -0.19 | 0.04 | 0.060161 | 0.0036194 | 24.87442 | 0.088419 | 32.32 |
| 2005   | 2017 | -0.57 | 0.04 | 0.060161 | 0.0036194 | 23.35829 | -0.14972 | 16.57 |
| 600502 | 2017 | -0.04 | 0.04 | 0.060161 | 0.0036194 | 24.87442 | 0.088419 | 32.32 |
| 930    | 2017 | -0.32 | 0.04 | 0.060161 | 0.0036194 | 22.50765 | 0.127292 | 15.76 |
| 600502 | 2017 | -0.8  | 0.04 | 0.060161 | 0.0036194 | 24.87442 | 0.088419 | 32.32 |
| 2005   | 2017 | -0.57 | 0.04 | 0.060161 | 0.0036194 | 23.35829 | -0.14972 | 16.57 |
| 600502 | 2017 | -0.34 | 0.04 | 0.060161 | 0.0036194 | 24.87442 | 0.088419 | 32.32 |
| 2005   | 2017 | -0.57 | 0.04 | 0.060161 | 0.0036194 | 23.35829 | -0.14972 | 16.57 |
| 2005   | 2017 | -0.57 | 0.04 | 0.060161 | 0.0036194 | 23.35829 | -0.14972 | 16.57 |
| 2005   | 2017 | -0.33 | 0.04 | 0.060161 | 0.0036194 | 23.35829 | -0.14972 | 16.57 |
| 600552 | 2017 | -0.71 | 0.04 | 0.060161 | 0.0036194 | 22.38461 | 0.041277 | 21.74 |
| 600552 | 2017 | -0.29 | 0.04 | 0.060161 | 0.0036194 | 22.38461 | 0.041277 | 21.74 |
| 2005   | 2017 | -0.35 | 0.04 | 0.060161 | 0.0036194 | 23.35829 | -0.14972 | 16.57 |
| 2005   | 2017 | -0.35 | 0.04 | 0.060161 | 0.0036194 | 23.35829 | -0.14972 | 16.57 |
| 600502 | 2017 | -0.14 | 0.04 | 0.060161 | 0.0036194 | 24.87442 | 0.088419 | 32.32 |
| 600502 | 2017 | -0.58 | 0.04 | 0.060161 | 0.0036194 | 24.87442 | 0.088419 | 32.32 |
| 930    | 2017 | -0.32 | 0.04 | 0.060161 | 0.0036194 | 22.50765 | 0.127292 | 15.76 |
| 930    | 2017 | 0.374 | 0.04 | 0.060161 | 0.0036194 | 22.50765 | 0.127292 | 15.76 |
| 2005   | 2017 | 0.316 | 0.04 | 0.060161 | 0.0036194 | 23.35829 | -0.14972 | 16.57 |
| 600502 | 2017 | -0.36 | 0.04 | 0.060161 | 0.0036194 | 24.87442 | 0.088419 | 32.32 |
| 600552 | 2017 | -0.71 | 0.04 | 0.060161 | 0.0036194 | 21.76657 | 0.041277 | 21.74 |
| 600552 | 2017 | -0.11 | 0.04 | 0.060161 | 0.0036194 | 22.38461 | 0.041277 | 21.74 |
| 930    | 2017 | 0.568 | 0.04 | 0.060161 | 0.0036194 | 22.50765 | 0.127292 | 15.76 |
| 600552 | 2017 | 0.024 | 0.04 | 0.060161 | 0.0036194 | 22.38461 | 0.041277 | 21.74 |
| 600502 | 2017 | -0.36 | 0.04 | 0.060161 | 0.0036194 | 24.87442 | 0.088419 | 32.32 |
| 600502 | 2017 | -0.34 | 0.04 | 0.060161 | 0.0036194 | 24.87442 | 0.088419 | 32.32 |
| 2005   | 2017 | -0.08 | 0.04 | 0.060161 | 0.0036194 | 23.35829 | -0.14972 | 16.57 |
| 2005   | 2017 | -0.57 | 0.04 | 0.060161 | 0.0036194 | 23.35829 | -0.14972 | 16.57 |
| 600502 | 2017 | 0.525 | 0.04 | 0.060161 | 0.0036194 | 24.87442 | 0.088419 | 32.32 |
| 600502 | 2017 | -0.14 | 0.04 | 0.060161 | 0.0036194 | 24.87442 | 0.088419 | 32.32 |
| 600502 | 2017 | 0.083 | 0.04 | 0.060161 | 0.0036194 | 24.87442 | 0.088419 | 32.32 |
| 2005   | 2017 | -0.57 | 0.04 | 0.060161 | 0.0036194 | 23.35829 | -0.14972 | 16.57 |

|        |      |       |      |          |            |          |          |       |
|--------|------|-------|------|----------|------------|----------|----------|-------|
| 2005   | 2017 | -0.57 | 0.04 | 0.060161 | 0.0036194  | 23.35829 | -0.14972 | 16.57 |
| 930    | 2017 | 0.568 | 0.04 | 0.060161 | 0.0036194  | 22.50765 | 0.127292 | 15.76 |
| 600502 | 2017 | 0.083 | 0.04 | 0.060161 | 0.0036194  | 24.08231 | 0.088419 | 32.32 |
| 300257 | 2017 | -0.24 | 0.05 | 0.802598 | 0.64416398 | 22.51223 | 0.030842 | 56.54 |
| 600160 | 2017 | 0.598 | 0.05 | 0.802598 | 0.64416398 | 23.28427 | 0.086768 | 38.65 |
| 2061   | 2017 | -0.58 | 0.05 | 0.802598 | 0.64416398 | 23.96449 | 0.207331 | 60.24 |
| 2061   | 2017 | -0.58 | 0.05 | 0.802598 | 0.64416398 | 22.43247 | 0.207331 | 60.24 |
| 600160 | 2017 | 0.598 | 0.05 | 0.802598 | 0.64416398 | 23.28427 | 0.086768 | 38.65 |
| 2061   | 2017 | 0.745 | 0.05 | 0.802598 | 0.64416398 | 23.96449 | 0.207331 | 60.24 |
| 2061   | 2017 | 0.745 | 0.05 | 0.802598 | 0.64416398 | 23.96449 | 0.207331 | 60.24 |
| 2061   | 2017 | -0.14 | 0.05 | 0.802598 | 0.64416398 | 23.96449 | 0.207331 | 60.24 |
| 2061   | 2017 | -0.17 | 0.05 | 0.802598 | 0.64416398 | 23.96449 | 0.207331 | 60.24 |
| 2061   | 2017 | -0.18 | 0.05 | 0.802598 | 0.64416398 | 23.96449 | 0.207331 | 60.24 |
| 600160 | 2017 | -0.29 | 0.05 | 0.802598 | 0.64416398 | 23.28427 | 0.086768 | 38.65 |
| 600160 | 2017 | -0.06 | 0.05 | 0.802598 | 0.64416398 | 23.17706 | 0.086768 | 38.65 |
| 600160 | 2017 | 0.598 | 0.05 | 0.802598 | 0.64416398 | 23.28427 | 0.086768 | 38.65 |
| 300257 | 2017 | -0.68 | 0.05 | 0.802598 | 0.64416398 | 22.51223 | 0.030842 | 56.54 |
| 600160 | 2017 | 0.598 | 0.05 | 0.802598 | 0.64416398 | 23.28427 | 0.086768 | 38.65 |
| 300257 | 2017 | -0.68 | 0.05 | 0.802598 | 0.64416398 | 22.51223 | 0.030842 | 56.54 |
| 600160 | 2017 | -0.06 | 0.05 | 0.802598 | 0.64416398 | 23.28427 | 0.086768 | 38.65 |
| 2061   | 2017 | -0.25 | 0.05 | 0.802598 | 0.64416398 | 23.96449 | 0.207331 | 60.24 |
| 2061   | 2017 | -0.14 | 0.05 | 0.802598 | 0.64416398 | 23.96449 | 0.207331 | 60.24 |
| 300257 | 2017 | -0.68 | 0.05 | 0.802598 | 0.64416398 | 22.2599  | 0.030842 | 56.54 |
| 600160 | 2017 | -0.06 | 0.05 | 0.802598 | 0.64416398 | 23.28427 | 0.086768 | 38.65 |
| 2061   | 2017 | -0.18 | 0.05 | 0.802598 | 0.64416398 | 23.96449 | 0.207331 | 60.24 |
| 2061   | 2017 | -0.14 | 0.05 | 0.802598 | 0.64416398 | 23.96449 | 0.207331 | 60.24 |
| 300257 | 2017 | -0.68 | 0.05 | 0.802598 | 0.64416398 | 22.51223 | 0.030842 | 56.54 |
| 300257 | 2017 | -0.68 | 0.05 | 0.802598 | 0.64416398 | 22.51223 | 0.030842 | 56.54 |
| 300257 | 2017 | -0.5  | 0.05 | 0.802598 | 0.64416398 | 22.51223 | 0.030842 | 56.54 |
| 600160 | 2017 | 0.156 | 0.05 | 0.802598 | 0.64416398 | 23.28427 | 0.086768 | 38.65 |
| 300257 | 2017 | -0.68 | 0.05 | 0.802598 | 0.64416398 | 22.51223 | 0.030842 | 56.54 |
| 600160 | 2017 | 0.598 | 0.05 | 0.802598 | 0.64416398 | 23.28427 | 0.086768 | 38.65 |
| 2061   | 2017 | -0.14 | 0.05 | 0.802598 | 0.64416398 | 23.96449 | 0.207331 | 60.24 |
| 300257 | 2017 | -0.68 | 0.05 | 0.802598 | 0.64416398 | 22.51223 | 0.030842 | 56.54 |
| 600160 | 2017 | 0.598 | 0.05 | 0.802598 | 0.64416398 | 23.28427 | 0.086768 | 38.65 |
| 600160 | 2017 | 0.083 | 0.05 | 0.802598 | 0.64416398 | 23.28427 | 0.086768 | 38.65 |
| 2061   | 2017 | -0.2  | 0.05 | 0.802598 | 0.64416398 | 23.96449 | 0.207331 | 60.24 |
| 300257 | 2017 | -0.39 | 0.05 | 0.802598 | 0.64416398 | 22.51223 | 0.030842 | 56.54 |
| 2061   | 2017 | -0.14 | 0.05 | 0.802598 | 0.64416398 | 23.96449 | 0.207331 | 60.24 |
| 2061   | 2017 | 0.745 | 0.05 | 0.802598 | 0.64416398 | 23.96449 | 0.207331 | 60.24 |
| 600160 | 2017 | -0.73 | 0.05 | 0.802598 | 0.64416398 | 23.28427 | 0.086768 | 38.65 |
| 600160 | 2017 | 0.598 | 0.05 | 0.802598 | 0.64416398 | 23.28427 | 0.086768 | 38.65 |
| 600160 | 2017 | -0.4  | 0.05 | 0.802598 | 0.64416398 | 23.28427 | 0.086768 | 38.65 |
| 300257 | 2017 | -0.5  | 0.05 | 0.802598 | 0.64416398 | 22.51223 | 0.030842 | 56.54 |
| 600160 | 2017 | 0.598 | 0.05 | 0.802598 | 0.64416398 | 23.28427 | 0.086768 | 38.65 |
| 606    | 2017 | 0.397 | 0    | 0.181916 | 0.0330933  | 22.06823 | 0.026494 | 16.78 |
| 601168 | 2017 | -0.12 | 0    | 0.181916 | 0.0330933  | 24.19823 | 0.019665 | 28.21 |
| 600869 | 2017 | -0.3  | 0    | 0.181916 | 0.0330933  | 23.6606  | 0.014888 | 67.14 |
| 600243 | 2017 | -0.56 | 0    | 0.181916 | 0.0330933  | 21.80607 | 0.00921  | 11.85 |
| 600243 | 2017 | 0.034 | 0    | 0.181916 | 0.0330933  | 21.80607 | 0.00921  | 11.85 |
| 600869 | 2017 | 0.031 | 0    | 0.181916 | 0.0330933  | 23.6606  | 0.014888 | 67.14 |
| 600243 | 2017 | -0.03 | 0    | 0.181916 | 0.0330933  | 21.80607 | 0.00921  | 11.85 |
| 600243 | 2017 | -0.27 | 0    | 0.181916 | 0.0330933  | 21.80607 | 0.00921  | 11.85 |
| 600243 | 2017 | 0.107 | 0    | 0.181916 | 0.0330933  | 21.80607 | 0.00921  | 11.85 |

|        |      |       |      |          |           |          |          |       |
|--------|------|-------|------|----------|-----------|----------|----------|-------|
| 606    | 2017 | 0.397 | 0    | 0.181916 | 0.0330933 | 22.06823 | 0.026494 | 16.78 |
| 600243 | 2017 | -0.27 | 0    | 0.181916 | 0.0330933 | 21.80607 | 0.00921  | 11.85 |
| 606    | 2017 | 0.397 | 0    | 0.181916 | 0.0330933 | 22.06823 | 0.026494 | 16.78 |
| 600243 | 2017 | 0.77  | 0    | 0.181916 | 0.0330933 | 21.80607 | 0.00921  | 11.85 |
| 600243 | 2017 | -0.27 | 0    | 0.181916 | 0.0330933 | 21.80607 | 0.00921  | 11.85 |
| 600869 | 2017 | -0.62 | 0    | 0.181916 | 0.0330933 | 23.6606  | 0.014888 | 67.14 |
| 600714 | 2017 | 0.108 | 0    | 0.181916 | 0.0330933 | 20.29584 | 0.02031  | 42.5  |
| 600869 | 2017 | -0.34 | 0    | 0.181916 | 0.0330933 | 23.6606  | 0.014888 | 67.14 |
| 600771 | 2017 | 0.316 | 0    | 0.181916 | 0.0330933 | 21.64658 | 0.126412 | 23.22 |
| 601168 | 2017 | -0.25 | 0    | 0.181916 | 0.0330933 | 23.70663 | 0.019665 | 28.21 |
| 601168 | 2017 | -0.25 | 0    | 0.181916 | 0.0330933 | 24.19823 | 0.019665 | 28.21 |
| 601168 | 2017 | -0.21 | 0    | 0.181916 | 0.0330933 | 24.19823 | 0.019665 | 28.21 |
| 600869 | 2017 | -0.62 | 0    | 0.181916 | 0.0330933 | 23.6606  | 0.014888 | 67.14 |
| 600869 | 2017 | -0.34 | 0    | 0.181916 | 0.0330933 | 23.6606  | 0.014888 | 67.14 |
| 600869 | 2017 | -0.34 | 0    | 0.181916 | 0.0330933 | 23.6606  | 0.014888 | 67.14 |
| 600869 | 2017 | 0.488 | 0    | 0.181916 | 0.0330933 | 23.6606  | 0.014888 | 67.14 |
| 601168 | 2017 | -0.68 | 0    | 0.181916 | 0.0330933 | 24.19823 | 0.019665 | 28.21 |
| 600243 | 2017 | -0.22 | 0    | 0.181916 | 0.0330933 | 21.80607 | 0.00921  | 11.85 |
| 606    | 2017 | 0.397 | 0    | 0.181916 | 0.0330933 | 21.76859 | 0.026494 | 16.78 |
| 601168 | 2017 | -0.78 | 0    | 0.181916 | 0.0330933 | 24.19823 | 0.019665 | 28.21 |
| 601168 | 2017 | 0.546 | 0    | 0.181916 | 0.0330933 | 24.19823 | 0.019665 | 28.21 |
| 600771 | 2017 | 0.383 | 0    | 0.181916 | 0.0330933 | 21.64658 | 0.126412 | 23.22 |
| 600714 | 2017 | 0.108 | 0    | 0.181916 | 0.0330933 | 20.29584 | 0.02031  | 42.5  |
| 601168 | 2017 | -0.37 | 0    | 0.181916 | 0.0330933 | 24.19823 | 0.019665 | 28.21 |
| 606    | 2017 | 0.397 | 0    | 0.181916 | 0.0330933 | 22.06823 | 0.026494 | 16.78 |
| 600771 | 2017 | 0.648 | 0    | 0.181916 | 0.0330933 | 21.78999 | 0.126412 | 23.22 |
| 601168 | 2017 | -0.29 | 0    | 0.181916 | 0.0330933 | 24.19823 | 0.019665 | 28.21 |
| 600869 | 2017 | -0.31 | 0    | 0.181916 | 0.0330933 | 23.6606  | 0.014888 | 67.14 |
| 600869 | 2017 | -0.77 | 0    | 0.181916 | 0.0330933 | 23.6606  | 0.014888 | 67.14 |
| 600243 | 2017 | -0.27 | 0    | 0.181916 | 0.0330933 | 21.39605 | 0.00921  | 11.85 |
| 600869 | 2017 | -0.84 | 0    | 0.181916 | 0.0330933 | 23.6606  | 0.014888 | 67.14 |
| 600869 | 2017 | -0.84 | 0    | 0.181916 | 0.0330933 | 22.9512  | 0.014888 | 67.14 |
| 601168 | 2017 | 0.325 | 0    | 0.181916 | 0.0330933 | 24.19823 | 0.019665 | 28.21 |
| 601168 | 2017 | -0.21 | 0    | 0.181916 | 0.0330933 | 24.19823 | 0.019665 | 28.21 |
| 601168 | 2017 | 0.104 | 0    | 0.181916 | 0.0330933 | 24.19823 | 0.019665 | 28.21 |
| 600243 | 2017 | -0.56 | 0    | 0.181916 | 0.0330933 | 21.80607 | 0.00921  | 11.85 |
| 600869 | 2017 | -0.62 | 0    | 0.181916 | 0.0330933 | 23.6606  | 0.014888 | 67.14 |
| 601168 | 2017 | -0.78 | 0    | 0.181916 | 0.0330933 | 24.19823 | 0.019665 | 28.21 |
| 600243 | 2017 | -0.27 | 0    | 0.181916 | 0.0330933 | 21.80607 | 0.00921  | 11.85 |
| 600714 | 2017 | 0.108 | 0    | 0.181916 | 0.0330933 | 20.23954 | 0.02031  | 42.5  |
| 600869 | 2017 | -0.84 | 0    | 0.181916 | 0.0330933 | 23.6606  | 0.014888 | 67.14 |
| 600243 | 2017 | -0.27 | 0    | 0.181916 | 0.0330933 | 21.80607 | 0.00921  | 11.85 |
| 600771 | 2017 | 0.648 | 0    | 0.181916 | 0.0330933 | 21.64658 | 0.126412 | 23.22 |
| 600771 | 2017 | 0.316 | 0    | 0.181916 | 0.0330933 | 21.64658 | 0.126412 | 23.22 |
| 600869 | 2017 | -0.62 | 0    | 0.181916 | 0.0330933 | 23.6606  | 0.014888 | 67.14 |
| 600243 | 2017 | -0.27 | 0    | 0.181916 | 0.0330933 | 21.80607 | 0.00921  | 11.85 |
| 601168 | 2017 | -0.12 | 0    | 0.181916 | 0.0330933 | 24.19823 | 0.019665 | 28.21 |
| 600243 | 2017 | -0.56 | 0    | 0.181916 | 0.0330933 | 21.80607 | 0.00921  | 11.85 |
| 600439 | 2017 | -0.6  | 0.02 | 1.310362 | 1.7170474 | 22.21655 | 0.080671 | 32.34 |
| 600439 | 2017 | -0.6  | 0.02 | 1.310362 | 1.7170474 | 22.21655 | 0.080671 | 32.34 |
| 400    | 2017 | 0.444 | 0.02 | 1.310362 | 1.7170474 | 23.45169 | 0.083915 | 41.28 |
| 400    | 2017 | 0.669 | 0.02 | 1.310362 | 1.7170474 | 23.45169 | 0.083915 | 41.28 |
| 2358   | 2017 | 0.209 | 0.02 | 1.310362 | 1.7170474 | 22.86912 | 0.089895 | 21.33 |
| 2406   | 2017 | -0.36 | 0.02 | 1.310362 | 1.7170474 | 21.72602 | 0.079795 | 27.66 |

|        |      |       |      |          |            |          |          |       |
|--------|------|-------|------|----------|------------|----------|----------|-------|
| 400    | 2017 | 0.926 | 0.02 | 1.310362 | 1.7170474  | 23.45169 | 0.083915 | 41.28 |
| 400    | 2017 | 1.18  | 0.02 | 1.310362 | 1.7170474  | 23.45169 | 0.083915 | 41.28 |
| 400    | 2017 | 0.641 | 0.02 | 1.310362 | 1.7170474  | 23.45169 | 0.083915 | 41.28 |
| 2406   | 2017 | -0.52 | 0.02 | 1.310362 | 1.7170474  | 21.72602 | 0.079795 | 27.66 |
| 2358   | 2017 | 0.209 | 0.02 | 1.310362 | 1.7170474  | 22.829   | 0.089895 | 21.33 |
| 400    | 2017 | 1.098 | 0.02 | 1.310362 | 1.7170474  | 23.45169 | 0.083915 | 41.28 |
| 400    | 2017 | 1.18  | 0.02 | 1.310362 | 1.7170474  | 23.45169 | 0.083915 | 41.28 |
| 400    | 2017 | 0.775 | 0.02 | 1.310362 | 1.7170474  | 23.45169 | 0.083915 | 41.28 |
| 2406   | 2017 | -0.27 | 0.02 | 1.310362 | 1.7170474  | 21.72602 | 0.079795 | 27.66 |
| 2406   | 2017 | -0.27 | 0.02 | 1.310362 | 1.7170474  | 21.72602 | 0.079795 | 27.66 |
| 400    | 2017 | 0.926 | 0.02 | 1.310362 | 1.7170474  | 23.45169 | 0.083915 | 41.28 |
| 2406   | 2017 | -0.52 | 0.02 | 1.310362 | 1.7170474  | 21.72602 | 0.079795 | 27.66 |
| 2358   | 2017 | -0.31 | 0.02 | 1.310362 | 1.7170474  | 22.86912 | 0.089895 | 21.33 |
| 600439 | 2017 | -0.69 | 0.02 | 1.310362 | 1.7170474  | 22.21655 | 0.080671 | 32.34 |
| 400    | 2017 | 1.13  | 0.02 | 1.310362 | 1.7170474  | 23.45169 | 0.083915 | 41.28 |
| 400    | 2017 | -0.14 | 0.02 | 1.310362 | 1.7170474  | 23.45169 | 0.083915 | 41.28 |
| 400    | 2017 | 0.66  | 0.02 | 1.310362 | 1.7170474  | 23.45169 | 0.083915 | 41.28 |
| 600439 | 2017 | -0.64 | 0.02 | 1.310362 | 1.7170474  | 22.1741  | 0.080671 | 32.34 |
| 400    | 2017 | 0.799 | 0.02 | 1.310362 | 1.7170474  | 23.45169 | 0.083915 | 41.28 |
| 400    | 2017 | 0.671 | 0.02 | 1.310362 | 1.7170474  | 23.45169 | 0.083915 | 41.28 |
| 400    | 2017 | 0.297 | 0.02 | 1.310362 | 1.7170474  | 23.45169 | 0.083915 | 41.28 |
| 2358   | 2017 | 0.147 | 0.02 | 1.310362 | 1.7170474  | 22.86912 | 0.089895 | 21.33 |
| 400    | 2017 | 1.015 | 0.02 | 1.310362 | 1.7170474  | 23.21005 | 0.083915 | 41.28 |
| 600439 | 2017 | -0.69 | 0.02 | 1.310362 | 1.7170474  | 22.21655 | 0.080671 | 32.34 |
| 600439 | 2017 | -0.6  | 0.02 | 1.310362 | 1.7170474  | 22.21655 | 0.080671 | 32.34 |
| 2358   | 2017 | -0.31 | 0.02 | 1.310362 | 1.7170474  | 22.86912 | 0.089895 | 21.33 |
| 2358   | 2017 | -0.31 | 0.02 | 1.310362 | 1.7170474  | 22.86912 | 0.089895 | 21.33 |
| 2406   | 2017 | -0.52 | 0.02 | 1.310362 | 1.7170474  | 21.71701 | 0.079795 | 27.66 |
| 833    | 2017 | -0.93 | 0.05 | 0.87855  | 0.77185051 | 21.80316 | 0.029412 | 31.31 |
| 833    | 2017 | -0.93 | 0.05 | 0.87855  | 0.77185051 | 21.94131 | 0.029412 | 31.31 |
| 833    | 2017 | -0.93 | 0.05 | 0.87855  | 0.77185051 | 21.94131 | 0.029412 | 31.31 |
| 833    | 2017 | -0.93 | 0.05 | 0.87855  | 0.77185051 | 21.94131 | 0.029412 | 31.31 |
| 833    | 2017 | -0.93 | 0.05 | 0.87855  | 0.77185051 | 21.94131 | 0.029412 | 31.31 |
| 600996 | 2017 | 0.416 | 0.01 | 0.693147 | 0.48045301 | 22.86647 | 0.104273 | 42.52 |
| 733    | 2017 | -0.73 | 0.01 | 0.693147 | 0.48045301 | 22.92013 | 0.048331 | 36.13 |
| 300288 | 2017 | 1.043 | 0.01 | 0.693147 | 0.48045301 | 21.14735 | 0.068839 | 36.25 |
| 600523 | 2017 | -0.62 | 0.01 | 0.693147 | 0.48045301 | 22.02034 | 0.085429 | 37.01 |
| 589    | 2017 | -0.37 | 0.01 | 0.693147 | 0.48045301 | 22.99698 | -0.06638 | 25.33 |
| 851    | 2017 | 0.766 | 0.01 | 0.693147 | 0.48045301 | 22.82348 | 0.053923 | 12.81 |
| 600765 | 2017 | -0.27 | 0.01 | 0.693147 | 0.48045301 | 23.25624 | 0.025599 | 29.48 |
| 733    | 2017 | -0.05 | 0.01 | 0.693147 | 0.48045301 | 22.92013 | 0.048331 | 36.13 |
| 920    | 2017 | -0.53 | 0.01 | 0.693147 | 0.48045301 | 21.32136 | 0.131033 | 42.64 |
| 733    | 2017 | -0.05 | 0.01 | 0.693147 | 0.48045301 | 22.92013 | 0.048331 | 36.13 |
| 600765 | 2017 | 0.508 | 0.01 | 0.693147 | 0.48045301 | 23.25624 | 0.025599 | 29.48 |
| 603058 | 2017 | 0.664 | 0.01 | 0.693147 | 0.48045301 | 20.67457 | 0.109111 | 45.9  |
| 2025   | 2017 | 0.351 | 0.01 | 0.693147 | 0.48045301 | 22.20306 | 0.122064 | 41.65 |
| 851    | 2017 | 0.849 | 0.01 | 0.693147 | 0.48045301 | 22.82348 | 0.053923 | 12.81 |
| 603058 | 2017 | 0.664 | 0.01 | 0.693147 | 0.48045301 | 20.67457 | 0.109111 | 45.9  |
| 920    | 2017 | -0.53 | 0.01 | 0.693147 | 0.48045301 | 21.32136 | 0.131033 | 42.64 |
| 2025   | 2017 | 0.522 | 0.01 | 0.693147 | 0.48045301 | 21.8171  | 0.122064 | 41.65 |
| 603058 | 2017 | -0.34 | 0.01 | 0.693147 | 0.48045301 | 20.67457 | 0.109111 | 45.9  |
| 603058 | 2017 | -0.25 | 0.01 | 0.693147 | 0.48045301 | 20.67457 | 0.109111 | 45.9  |
| 600523 | 2017 | -0.13 | 0.01 | 0.693147 | 0.48045301 | 22.02034 | 0.085429 | 37.01 |
| 851    | 2017 | 0.187 | 0.01 | 0.693147 | 0.48045301 | 22.82348 | 0.053923 | 12.81 |

|        |      |       |      |          |            |          |          |       |
|--------|------|-------|------|----------|------------|----------|----------|-------|
| 2037   | 2017 | -0.3  | 0.01 | 0.693147 | 0.48045301 | 21.84828 | 0.041118 | 30    |
| 300288 | 2017 | 1.043 | 0.01 | 0.693147 | 0.48045301 | 21.14735 | 0.068839 | 36.25 |
| 600523 | 2017 | 0.484 | 0.01 | 0.693147 | 0.48045301 | 22.02034 | 0.085429 | 37.01 |
| 600765 | 2017 | -0.54 | 0.01 | 0.693147 | 0.48045301 | 23.25624 | 0.025599 | 29.48 |
| 600594 | 2017 | -0.7  | 0.01 | 0.693147 | 0.48045301 | 22.69658 | 0.086967 | 23.15 |
| 733    | 2017 | -0.07 | 0.01 | 0.693147 | 0.48045301 | 22.11882 | 0.048331 | 36.13 |
| 600765 | 2017 | 0.155 | 0.01 | 0.693147 | 0.48045301 | 23.25624 | 0.025599 | 29.48 |
| 589    | 2017 | -0.37 | 0.01 | 0.693147 | 0.48045301 | 22.99698 | -0.06638 | 25.33 |
| 600523 | 2017 | 0.484 | 0.01 | 0.693147 | 0.48045301 | 22.02034 | 0.085429 | 37.01 |
| 733    | 2017 | -0.73 | 0.01 | 0.693147 | 0.48045301 | 22.92013 | 0.048331 | 36.13 |
| 733    | 2017 | -0.05 | 0.01 | 0.693147 | 0.48045301 | 22.92013 | 0.048331 | 36.13 |
| 733    | 2017 | -0.08 | 0.01 | 0.693147 | 0.48045301 | 22.92013 | 0.048331 | 36.13 |
| 733    | 2017 | -0.05 | 0.01 | 0.693147 | 0.48045301 | 22.92013 | 0.048331 | 36.13 |
| 733    | 2017 | -0.53 | 0.01 | 0.693147 | 0.48045301 | 22.92013 | 0.048331 | 36.13 |
| 600594 | 2017 | 0.186 | 0.01 | 0.693147 | 0.48045301 | 22.69658 | 0.086967 | 23.15 |
| 600227 | 2017 | -0.49 | 0.01 | 0.693147 | 0.48045301 | 22.65688 | 0.007916 | 28.27 |
| 2025   | 2017 | 0.758 | 0.01 | 0.693147 | 0.48045301 | 22.20306 | 0.122064 | 41.65 |
| 300288 | 2017 | 1.043 | 0.01 | 0.693147 | 0.48045301 | 21.14735 | 0.068839 | 36.25 |
| 920    | 2017 | -0.53 | 0.01 | 0.693147 | 0.48045301 | 21.32136 | 0.131033 | 42.64 |
| 733    | 2017 | 0.197 | 0.01 | 0.693147 | 0.48045301 | 22.92013 | 0.048331 | 36.13 |
| 300288 | 2017 | 1.043 | 0.01 | 0.693147 | 0.48045301 | 21.14735 | 0.068839 | 36.25 |
| 600523 | 2017 | 0.484 | 0.01 | 0.693147 | 0.48045301 | 22.02034 | 0.085429 | 37.01 |
| 851    | 2017 | 0.849 | 0.01 | 0.693147 | 0.48045301 | 22.82348 | 0.053923 | 12.81 |
| 600523 | 2017 | 0.484 | 0.01 | 0.693147 | 0.48045301 | 22.02034 | 0.085429 | 37.01 |
| 920    | 2017 | -0.53 | 0.01 | 0.693147 | 0.48045301 | 21.32136 | 0.131033 | 42.64 |
| 600765 | 2017 | 0.155 | 0.01 | 0.693147 | 0.48045301 | 23.25624 | 0.025599 | 29.48 |
| 2025   | 2017 | 0.92  | 0.01 | 0.693147 | 0.48045301 | 22.20306 | 0.122064 | 41.65 |
| 2025   | 2017 | 0.204 | 0.01 | 0.693147 | 0.48045301 | 22.20306 | 0.122064 | 41.65 |
| 600594 | 2017 | -0.7  | 0.01 | 0.693147 | 0.48045301 | 22.52523 | 0.086967 | 23.15 |
| 733    | 2017 | -0.73 | 0.01 | 0.693147 | 0.48045301 | 22.92013 | 0.048331 | 36.13 |
| 733    | 2017 | -0.06 | 0.01 | 0.693147 | 0.48045301 | 22.92013 | 0.048331 | 36.13 |
| 2025   | 2017 | 0.863 | 0.01 | 0.693147 | 0.48045301 | 22.20306 | 0.122064 | 41.65 |
| 2037   | 2017 | -0.3  | 0.01 | 0.693147 | 0.48045301 | 22.7815  | 0.041118 | 30    |
| 603058 | 2017 | -0.31 | 0.01 | 0.693147 | 0.48045301 | 20.62417 | 0.109111 | 45.9  |
| 600227 | 2017 | -0.47 | 0.01 | 0.693147 | 0.48045301 | 22.65688 | 0.007916 | 28.27 |
| 2025   | 2017 | 0.59  | 0.01 | 0.693147 | 0.48045301 | 22.20306 | 0.122064 | 41.65 |
| 600523 | 2017 | -0.03 | 0.01 | 0.693147 | 0.48045301 | 22.02034 | 0.085429 | 37.01 |
| 600523 | 2017 | 0.484 | 0.01 | 0.693147 | 0.48045301 | 22.02034 | 0.085429 | 37.01 |
| 2025   | 2017 | 0.579 | 0.01 | 0.693147 | 0.48045301 | 22.20306 | 0.122064 | 41.65 |
| 2025   | 2017 | 0.92  | 0.01 | 0.693147 | 0.48045301 | 22.20306 | 0.122064 | 41.65 |
| 600996 | 2017 | 0.416 | 0.01 | 0.693147 | 0.48045301 | 22.86647 | 0.104273 | 42.52 |
| 600765 | 2017 | -0.15 | 0.01 | 0.693147 | 0.48045301 | 23.25624 | 0.025599 | 29.48 |
| 2025   | 2017 | 0.39  | 0.01 | 0.693147 | 0.48045301 | 22.20306 | 0.122064 | 41.65 |
| 600227 | 2017 | -0.55 | 0.01 | 0.693147 | 0.48045301 | 22.65688 | 0.007916 | 28.27 |
| 600765 | 2017 | -0.6  | 0.01 | 0.693147 | 0.48045301 | 23.25624 | 0.025599 | 29.48 |
| 600523 | 2017 | 0.484 | 0.01 | 0.693147 | 0.48045301 | 22.02034 | 0.085429 | 37.01 |
| 600765 | 2017 | 0.508 | 0.01 | 0.693147 | 0.48045301 | 23.25624 | 0.025599 | 29.48 |
| 600765 | 2017 | 0.155 | 0.01 | 0.693147 | 0.48045301 | 23.25624 | 0.025599 | 29.48 |
| 600227 | 2017 | -0.38 | 0.01 | 0.693147 | 0.48045301 | 22.65688 | 0.007916 | 28.27 |
| 600765 | 2017 | 0.079 | 0.01 | 0.693147 | 0.48045301 | 23.25624 | 0.025599 | 29.48 |
| 589    | 2017 | -0.37 | 0.01 | 0.693147 | 0.48045301 | 22.95621 | -0.06638 | 25.33 |
| 733    | 2017 | -0.4  | 0.01 | 0.693147 | 0.48045301 | 22.92013 | 0.048331 | 36.13 |
| 600227 | 2017 | 0.508 | 0.01 | 0.693147 | 0.48045301 | 22.65688 | 0.007916 | 28.27 |
| 600765 | 2017 | 0.155 | 0.01 | 0.693147 | 0.48045301 | 23.25624 | 0.025599 | 29.48 |



|        |      |       |      |          |            |          |          |       |
|--------|------|-------|------|----------|------------|----------|----------|-------|
| 2025   | 2017 | 0.663 | 0.01 | 0.693147 | 0.48045301 | 22.20306 | 0.122064 | 41.65 |
| 600523 | 2017 | -0.62 | 0.01 | 0.693147 | 0.48045301 | 21.5106  | 0.085429 | 37.01 |
| 300288 | 2017 | 1.043 | 0.01 | 0.693147 | 0.48045301 | 21.14735 | 0.068839 | 36.25 |
| 600765 | 2017 | 0.376 | 0.01 | 0.693147 | 0.48045301 | 23.25624 | 0.025599 | 29.48 |
| 733    | 2017 | 0.346 | 0.01 | 0.693147 | 0.48045301 | 22.92013 | 0.048331 | 36.13 |
| 733    | 2017 | -0.13 | 0.01 | 0.693147 | 0.48045301 | 22.92013 | 0.048331 | 36.13 |
| 920    | 2017 | -0.53 | 0.01 | 0.693147 | 0.48045301 | 21.32136 | 0.131033 | 42.64 |
| 851    | 2017 | 0.849 | 0.01 | 0.693147 | 0.48045301 | 22.82348 | 0.053923 | 12.81 |
| 851    | 2017 | 0.766 | 0.01 | 0.693147 | 0.48045301 | 22.30679 | 0.053923 | 12.81 |
| 2025   | 2017 | 0.548 | 0.01 | 0.693147 | 0.48045301 | 22.20306 | 0.122064 | 41.65 |
| 600227 | 2017 | -0.38 | 0.01 | 0.693147 | 0.48045301 | 22.63343 | 0.007916 | 28.27 |
| 600765 | 2017 | -0.37 | 0.01 | 0.693147 | 0.48045301 | 23.25624 | 0.025599 | 29.48 |
| 2037   | 2017 | -0.3  | 0.01 | 0.693147 | 0.48045301 | 22.7815  | 0.041118 | 30    |
| 600594 | 2017 | 0.628 | 0.01 | 0.693147 | 0.48045301 | 22.69658 | 0.086967 | 23.15 |
| 300288 | 2017 | 0.954 | 0.01 | 0.693147 | 0.48045301 | 21.14735 | 0.068839 | 36.25 |
| 2037   | 2017 | -0.3  | 0.01 | 0.693147 | 0.48045301 | 22.7815  | 0.041118 | 30    |
| 600523 | 2017 | 0.103 | 0.01 | 0.693147 | 0.48045301 | 22.02034 | 0.085429 | 37.01 |
| 600523 | 2017 | -0.03 | 0.01 | 0.693147 | 0.48045301 | 22.02034 | 0.085429 | 37.01 |
| 589    | 2017 | -0.37 | 0.01 | 0.693147 | 0.48045301 | 22.99698 | -0.06638 | 25.33 |
| 600996 | 2017 | 0.416 | 0.01 | 0.693147 | 0.48045301 | 22.85927 | 0.104273 | 42.52 |
| 600765 | 2017 | 0.267 | 0.01 | 0.693147 | 0.48045301 | 22.05638 | 0.025599 | 29.48 |
| 733    | 2017 | 0.594 | 0.01 | 0.693147 | 0.48045301 | 22.92013 | 0.048331 | 36.13 |
| 600523 | 2017 | 0.484 | 0.01 | 0.693147 | 0.48045301 | 22.02034 | 0.085429 | 37.01 |
| 600765 | 2017 | 0.155 | 0.01 | 0.693147 | 0.48045301 | 23.25624 | 0.025599 | 29.48 |
| 851    | 2017 | 0.849 | 0.01 | 0.693147 | 0.48045301 | 22.82348 | 0.053923 | 12.81 |
| 600523 | 2017 | 0.484 | 0.01 | 0.693147 | 0.48045301 | 22.02034 | 0.085429 | 37.01 |
| 300288 | 2017 | -0.28 | 0.01 | 0.693147 | 0.48045301 | 21.14735 | 0.068839 | 36.25 |
| 600523 | 2017 | -0.41 | 0.01 | 0.693147 | 0.48045301 | 22.02034 | 0.085429 | 37.01 |
| 920    | 2017 | -0.59 | 0.01 | 0.693147 | 0.48045301 | 21.32136 | 0.131033 | 42.64 |
| 600523 | 2017 | 0.484 | 0.01 | 0.693147 | 0.48045301 | 22.02034 | 0.085429 | 37.01 |
| 733    | 2017 | -0.07 | 0.01 | 0.693147 | 0.48045301 | 22.92013 | 0.048331 | 36.13 |
| 600523 | 2017 | 0.081 | 0.01 | 0.693147 | 0.48045301 | 22.02034 | 0.085429 | 37.01 |
| 851    | 2017 | 0.849 | 0.01 | 0.693147 | 0.48045301 | 22.82348 | 0.053923 | 12.81 |
| 603058 | 2017 | -0.46 | 0.01 | 0.693147 | 0.48045301 | 20.67457 | 0.109111 | 45.9  |
| 600765 | 2017 | 0.349 | 0.01 | 0.693147 | 0.48045301 | 23.25624 | 0.025599 | 29.48 |
| 300288 | 2017 | 0.681 | 0.01 | 0.693147 | 0.48045301 | 21.00873 | 0.068839 | 36.25 |
| 2037   | 2017 | -0.3  | 0.01 | 0.693147 | 0.48045301 | 22.7815  | 0.041118 | 30    |
| 600594 | 2017 | 0.628 | 0.01 | 0.693147 | 0.48045301 | 22.69658 | 0.086967 | 23.15 |
| 920    | 2017 | -0.53 | 0.01 | 0.693147 | 0.48045301 | 21.25651 | 0.131033 | 42.64 |
| 2037   | 2017 | -0.3  | 0.01 | 0.693147 | 0.48045301 | 22.7815  | 0.041118 | 30    |
| 589    | 2017 | -0.37 | 0.01 | 0.693147 | 0.48045301 | 22.99698 | -0.06638 | 25.33 |
| 600594 | 2017 | -0.7  | 0.01 | 0.693147 | 0.48045301 | 22.69658 | 0.086967 | 23.15 |
| 2037   | 2017 | -0.3  | 0.01 | 0.693147 | 0.48045301 | 22.7815  | 0.041118 | 30    |
| 2798   | 2017 | -0.78 | 0.01 | 0.936955 | 0.87788458 | 20.954   | 0.051888 | 20.79 |
| 2798   | 2017 | -0.78 | 0.01 | 0.936955 | 0.87788458 | 20.90455 | 0.051888 | 20.79 |
| 2798   | 2017 | -0.78 | 0.01 | 0.936955 | 0.87788458 | 20.954   | 0.051888 | 20.79 |
| 2798   | 2017 | -0.78 | 0.01 | 0.936955 | 0.87788458 | 20.954   | 0.051888 | 20.79 |
| 2798   | 2017 | -0.78 | 0.01 | 0.936955 | 0.87788458 | 20.954   | 0.051888 | 20.79 |
| 600988 | 2017 | 0.521 | 0    | 0.976396 | 0.95334854 | 22.05383 | 0.101651 | 30.27 |
| 600988 | 2017 | 0.521 | 0    | 0.976396 | 0.95334854 | 22.28881 | 0.101651 | 30.27 |
| 600988 | 2017 | 0.521 | 0    | 0.976396 | 0.95334854 | 22.28881 | 0.101651 | 30.27 |
| 600988 | 2017 | 0.521 | 0    | 0.976396 | 0.95334854 | 22.28881 | 0.101651 | 30.27 |
| 600988 | 2017 | 0.521 | 0    | 0.976396 | 0.95334854 | 22.28881 | 0.101651 | 30.27 |
| 2501   | 2017 | -0.63 | 0.07 | 0.04596  | 0.00211236 | 23.44625 | 0.065442 | 14.48 |

|        |      |       |      |          |            |          |          |       |
|--------|------|-------|------|----------|------------|----------|----------|-------|
| 2501   | 2017 | -0.63 | 0.07 | 0.04596  | 0.00211236 | 23.44625 | 0.065442 | 14.48 |
| 2501   | 2017 | -0.63 | 0.07 | 0.04596  | 0.00211236 | 23.44625 | 0.065442 | 14.48 |
| 2501   | 2017 | -0.63 | 0.07 | 0.04596  | 0.00211236 | 23.36152 | 0.065442 | 14.48 |
| 2501   | 2017 | -0.63 | 0.07 | 0.04596  | 0.00211236 | 23.44625 | 0.065442 | 14.48 |
| 2501   | 2017 | -0.63 | 0.07 | 0.04596  | 0.00211236 | 23.44625 | 0.065442 | 14.48 |
| 300405 | 2017 | 0.691 | 0    | 0.005528 | 0.00003056 | 21.32697 | 0.023807 | 43.46 |
| 300082 | 2017 | 0.356 | 0    | 0.005528 | 0.00003056 | 22.56405 | 0.069623 | 53.39 |
| 300082 | 2017 | 0.687 | 0    | 0.005528 | 0.00003056 | 22.56405 | 0.069623 | 53.39 |
| 300405 | 2017 | 0.691 | 0    | 0.005528 | 0.00003056 | 21.32697 | 0.023807 | 43.46 |
| 300082 | 2017 | 0.687 | 0    | 0.005528 | 0.00003056 | 22.56405 | 0.069623 | 53.39 |
| 300082 | 2017 | 0.356 | 0    | 0.005528 | 0.00003056 | 22.56405 | 0.069623 | 53.39 |
| 300082 | 2017 | 0.687 | 0    | 0.005528 | 0.00003056 | 22.56405 | 0.069623 | 53.39 |
| 300082 | 2017 | -0.34 | 0    | 0.005528 | 0.00003056 | 22.56405 | 0.069623 | 53.39 |
| 300082 | 2017 | 0.687 | 0    | 0.005528 | 0.00003056 | 22.56405 | 0.069623 | 53.39 |
| 300405 | 2017 | 0.691 | 0    | 0.005528 | 0.00003056 | 21.32697 | 0.023807 | 43.46 |
| 300082 | 2017 | -0    | 0    | 0.005528 | 0.00003056 | 22.56405 | 0.069623 | 53.39 |
| 300082 | 2017 | -0.44 | 0    | 0.005528 | 0.00003056 | 22.56405 | 0.069623 | 53.39 |
| 300082 | 2017 | 0.356 | 0    | 0.005528 | 0.00003056 | 22.56405 | 0.069623 | 53.39 |
| 300405 | 2017 | 0.691 | 0    | 0.005528 | 0.00003056 | 21.25691 | 0.023807 | 43.46 |
| 300082 | 2017 | 0.025 | 0    | 0.005528 | 0.00003056 | 22.56405 | 0.069623 | 53.39 |
| 300405 | 2017 | 0.691 | 0    | 0.005528 | 0.00003056 | 21.32697 | 0.023807 | 43.46 |
| 300082 | 2017 | 0.025 | 0    | 0.005528 | 0.00003056 | 21.85938 | 0.069623 | 53.39 |
| 300405 | 2017 | 0.691 | 0    | 0.005528 | 0.00003056 | 21.32697 | 0.023807 | 43.46 |
| 300547 | 2017 | -0.22 | 0.01 | 0.451985 | 0.2042908  | 20.63906 | 0.163217 | 16.25 |
| 300547 | 2017 | -0.66 | 0.01 | 0.451985 | 0.2042908  | 20.63906 | 0.163217 | 16.25 |
| 300547 | 2017 | -0.5  | 0.01 | 0.451985 | 0.2042908  | 20.59211 | 0.163217 | 16.25 |
| 300547 | 2017 | -0.22 | 0.01 | 0.451985 | 0.2042908  | 20.63906 | 0.163217 | 16.25 |
| 300547 | 2017 | -0.66 | 0.01 | 0.451985 | 0.2042908  | 20.63906 | 0.163217 | 16.25 |
| 600351 | 2017 | -0.04 | 0    | 1.295231 | 1.6776223  | 22.1977  | 0.068562 | 24.77 |
| 600351 | 2017 | -0.48 | 0    | 1.295231 | 1.6776223  | 22.1977  | 0.068562 | 24.77 |
| 2753   | 2017 | 0.773 | 0    | 1.295231 | 1.6776223  | 21.28416 | 0.193668 | 29.13 |
| 600351 | 2017 | -0.48 | 0    | 1.295231 | 1.6776223  | 22.1977  | 0.068562 | 24.77 |
| 831    | 2017 | -0.94 | 0    | 1.295231 | 1.6776223  | 21.50055 | 0.01532  | 23.98 |
| 831    | 2017 | -0.9  | 0    | 1.295231 | 1.6776223  | 21.50055 | 0.01532  | 23.98 |
| 600351 | 2017 | -0.48 | 0    | 1.295231 | 1.6776223  | 22.1977  | 0.068562 | 24.77 |
| 831    | 2017 | -0.94 | 0    | 1.295231 | 1.6776223  | 21.92866 | 0.01532  | 23.98 |
| 600351 | 2017 | -0.48 | 0    | 1.295231 | 1.6776223  | 22.1977  | 0.068562 | 24.77 |
| 831    | 2017 | -0.3  | 0    | 1.295231 | 1.6776223  | 21.92866 | 0.01532  | 23.98 |
| 831    | 2017 | -0.9  | 0    | 1.295231 | 1.6776223  | 21.50055 | 0.01532  | 23.98 |
| 2753   | 2017 | 0.773 | 0    | 1.295231 | 1.6776223  | 21.28416 | 0.193668 | 29.13 |
| 2753   | 2017 | 0.773 | 0    | 1.295231 | 1.6776223  | 21.28416 | 0.193668 | 29.13 |
| 600351 | 2017 | -0.48 | 0    | 1.295231 | 1.6776223  | 22.12902 | 0.068562 | 24.77 |
| 600351 | 2017 | -0.04 | 0    | 1.295231 | 1.6776223  | 22.1977  | 0.068562 | 24.77 |
| 600351 | 2017 | -0.18 | 0    | 1.295231 | 1.6776223  | 22.1977  | 0.068562 | 24.77 |
| 600351 | 2017 | -0.48 | 0    | 1.295231 | 1.6776223  | 22.1977  | 0.068562 | 24.77 |
| 600351 | 2017 | -0.48 | 0    | 1.295231 | 1.6776223  | 22.1977  | 0.068562 | 24.77 |
| 600557 | 2017 | 0.813 | 0.02 | 1.350264 | 1.8232136  | 22.4085  | 0.10524  | 28.06 |
| 600557 | 2017 | 0.813 | 0.02 | 1.350264 | 1.8232136  | 22.4085  | 0.10524  | 28.06 |
| 603366 | 2017 | -0.26 | 0.02 | 1.350264 | 1.8232136  | 22.56718 | 0.015361 | 57.75 |
| 600276 | 2017 | 1.026 | 0.02 | 1.350264 | 1.8232136  | 23.61582 | 0.206543 | 24.31 |
| 600557 | 2017 | 0.813 | 0.02 | 1.350264 | 1.8232136  | 22.4085  | 0.10524  | 28.06 |
| 603366 | 2017 | -0.26 | 0.02 | 1.350264 | 1.8232136  | 22.56718 | 0.015361 | 57.75 |
| 603366 | 2017 | -0.7  | 0.02 | 1.350264 | 1.8232136  | 22.56718 | 0.015361 | 57.75 |
| 603366 | 2017 | -0.28 | 0.02 | 1.350264 | 1.8232136  | 22.56718 | 0.015361 | 57.75 |

|        |      |       |      |          |            |          |          |       |
|--------|------|-------|------|----------|------------|----------|----------|-------|
| 603688 | 2017 | 0.192 | 0.02 | 1.350264 | 1.8232136  | 21.0451  | 0.083251 | 29.34 |
| 603366 | 2017 | -0.26 | 0.02 | 1.350264 | 1.8232136  | 22.56718 | 0.015361 | 57.75 |
| 603366 | 2017 | -0.44 | 0.02 | 1.350264 | 1.8232136  | 22.56718 | 0.015361 | 57.75 |
| 603366 | 2017 | -0.19 | 0.02 | 1.350264 | 1.8232136  | 22.56718 | 0.015361 | 57.75 |
| 603366 | 2017 | 0.62  | 0.02 | 1.350264 | 1.8232136  | 22.56718 | 0.015361 | 57.75 |
| 603366 | 2017 | -0.32 | 0.02 | 1.350264 | 1.8232136  | 22.56718 | 0.015361 | 57.75 |
| 603366 | 2017 | -0.16 | 0.02 | 1.350264 | 1.8232136  | 22.56718 | 0.015361 | 57.75 |
| 603688 | 2017 | 0.247 | 0.02 | 1.350264 | 1.8232136  | 21.0451  | 0.083251 | 29.34 |
| 603688 | 2017 | -0.64 | 0.02 | 1.350264 | 1.8232136  | 21.0451  | 0.083251 | 29.34 |
| 600276 | 2017 | 1.203 | 0.02 | 1.350264 | 1.8232136  | 23.61582 | 0.206543 | 24.31 |
| 603366 | 2017 | -0.26 | 0.02 | 1.350264 | 1.8232136  | 22.56718 | 0.015361 | 57.75 |
| 603366 | 2017 | 0.62  | 0.02 | 1.350264 | 1.8232136  | 22.56718 | 0.015361 | 57.75 |
| 603688 | 2017 | -0.64 | 0.02 | 1.350264 | 1.8232136  | 21.02584 | 0.083251 | 29.34 |
| 603688 | 2017 | -0.64 | 0.02 | 1.350264 | 1.8232136  | 21.0451  | 0.083251 | 29.34 |
| 600276 | 2017 | 1.203 | 0.02 | 1.350264 | 1.8232136  | 23.61582 | 0.206543 | 24.31 |
| 603366 | 2017 | -0.7  | 0.02 | 1.350264 | 1.8232136  | 22.56718 | 0.015361 | 57.75 |
| 600557 | 2017 | 0.813 | 0.02 | 1.350264 | 1.8232136  | 22.35148 | 0.10524  | 28.06 |
| 600557 | 2017 | 0.813 | 0.02 | 1.350264 | 1.8232136  | 22.4085  | 0.10524  | 28.06 |
| 600276 | 2017 | 0.062 | 0.02 | 1.350264 | 1.8232136  | 23.49035 | 0.206543 | 24.31 |
| 603366 | 2017 | -0.19 | 0.02 | 1.350264 | 1.8232136  | 22.56718 | 0.015361 | 57.75 |
| 603366 | 2017 | -0.26 | 0.02 | 1.350264 | 1.8232136  | 22.56718 | 0.015361 | 57.75 |
| 600276 | 2017 | 1.221 | 0.02 | 1.350264 | 1.8232136  | 23.61582 | 0.206543 | 24.31 |
| 603366 | 2017 | -0.04 | 0.02 | 1.350264 | 1.8232136  | 22.41917 | 0.015361 | 57.75 |
| 603688 | 2017 | -0.64 | 0.02 | 1.350264 | 1.8232136  | 21.0451  | 0.083251 | 29.34 |
| 600557 | 2017 | 0.813 | 0.02 | 1.350264 | 1.8232136  | 22.4085  | 0.10524  | 28.06 |
| 603688 | 2017 | 0.247 | 0.02 | 1.350264 | 1.8232136  | 21.0451  | 0.083251 | 29.34 |
| 600557 | 2017 | 0.813 | 0.02 | 1.350264 | 1.8232136  | 22.4085  | 0.10524  | 28.06 |
| 603366 | 2017 | -0.26 | 0.02 | 1.350264 | 1.8232136  | 22.56718 | 0.015361 | 57.75 |
| 600276 | 2017 | 1.221 | 0.02 | 1.350264 | 1.8232136  | 23.61582 | 0.206543 | 24.31 |
| 600276 | 2017 | 0.581 | 0.02 | 1.350264 | 1.8232136  | 23.61582 | 0.206543 | 24.31 |
| 603366 | 2017 | -0.47 | 0.02 | 1.350264 | 1.8232136  | 22.56718 | 0.015361 | 57.75 |
| 810    | 2017 | 0.139 | 0.01 | 0.202027 | 0.04081489 | 22.14937 | 0.034491 | 54.58 |
| 810    | 2017 | 0.139 | 0.01 | 0.202027 | 0.04081489 | 22.74837 | 0.034491 | 54.58 |
| 731    | 2017 | 0.39  | 0.01 | 0.202027 | 0.04081489 | 22.19884 | 0.05442  | 12.18 |
| 2466   | 2017 | 0.631 | 0.01 | 0.202027 | 0.04081489 | 23.6047  | 0.24557  | 35.81 |
| 731    | 2017 | 0.39  | 0.01 | 0.202027 | 0.04081489 | 22.19884 | 0.05442  | 12.18 |
| 810    | 2017 | 0.302 | 0.01 | 0.202027 | 0.04081489 | 22.74837 | 0.034491 | 54.58 |
| 2466   | 2017 | 0.631 | 0.01 | 0.202027 | 4.08E-02   | 23.6047  | 0.24557  | 35.81 |
| 810    | 2017 | 0.061 | 0.01 | 0.202027 | 4.08E-02   | 22.74837 | 0.034491 | 54.58 |
| 810    | 2017 | -0.28 | 0.01 | 0.202027 | 4.08E-02   | 22.74837 | 0.034491 | 54.58 |
| 2466   | 2017 | -0.11 | 0.01 | 0.202027 | 4.08E-02   | 22.67032 | 0.24557  | 35.81 |
| 731    | 2017 | -0.93 | 0.01 | 0.202027 | 4.08E-02   | 22.04854 | 0.05442  | 12.18 |
| 2466   | 2017 | 0.631 | 0.01 | 0.202027 | 4.08E-02   | 23.6047  | 0.24557  | 35.81 |
| 2466   | 2017 | 0.631 | 0.01 | 0.202027 | 4.08E-02   | 23.6047  | 0.24557  | 35.81 |
| 810    | 2017 | 0.061 | 0.01 | 0.202027 | 4.08E-02   | 22.74837 | 0.034491 | 54.58 |
| 2466   | 2017 | 0.631 | 0.01 | 0.202027 | 4.08E-02   | 23.6047  | 0.24557  | 35.81 |
| 2466   | 2017 | 0.631 | 0.01 | 0.202027 | 4.08E-02   | 23.6047  | 0.24557  | 35.81 |
| 2466   | 2017 | 0.385 | 0.01 | 0.202027 | 4.08E-02   | 23.6047  | 0.24557  | 35.81 |
| 731    | 2017 | -0.05 | 0.01 | 0.202027 | 4.08E-02   | 22.19884 | 0.05442  | 12.18 |
| 2466   | 2017 | 0.631 | 0.01 | 0.202027 | 4.08E-02   | 23.6047  | 0.24557  | 35.81 |
| 810    | 2017 | 0.061 | 0.01 | 0.202027 | 4.08E-02   | 22.74837 | 0.034491 | 54.58 |
| 810    | 2017 | 0.854 | 0.01 | 0.202027 | 4.08E-02   | 22.74837 | 0.034491 | 54.58 |
| 2466   | 2017 | -0.11 | 0.01 | 0.202027 | 0.04081489 | 23.6047  | 0.24557  | 35.81 |
| 731    | 2017 | -0.93 | 0.01 | 0.202027 | 0.04081489 | 22.19884 | 0.05442  | 12.18 |

|        |      |       |      |          |            |          |          |       |
|--------|------|-------|------|----------|------------|----------|----------|-------|
| 600112 | 2017 | -0.23 | 0.01 | 0.005528 | 0.00003056 | 21.79113 | 0.01137  | 18.34 |
| 600112 | 2017 | -0.01 | 0.01 | 0.005528 | 0.00003056 | 21.79113 | 0.01137  | 18.34 |
| 600519 | 2017 | 0.078 | 0.01 | 0.005528 | 0.00003056 | 25.62565 | 0.302088 | 61.99 |
| 600112 | 2017 | -0.19 | 0.01 | 0.005528 | 0.00003056 | 21.79113 | 0.01137  | 18.34 |
| 600112 | 2017 | -0.01 | 0.01 | 0.005528 | 0.00003056 | 21.79113 | 0.01137  | 18.34 |
| 600992 | 2017 | 0.993 | 0.01 | 0.005528 | 0.00003056 | 21.53462 | 0.016144 | 23.46 |
| 600112 | 2017 | -0.67 | 0.01 | 0.005528 | 0.00003056 | 21.79113 | 0.01137  | 18.34 |
| 600112 | 2017 | -0.01 | 0.01 | 0.005528 | 0.00003056 | 21.79113 | 0.01137  | 18.34 |
| 600519 | 2017 | 0.078 | 0.01 | 0.005528 | 0.00003056 | 25.62565 | 0.302088 | 61.99 |
| 600112 | 2017 | -0.18 | 0.01 | 0.005528 | 0.00003056 | 21.79113 | 0.01137  | 18.34 |
| 600112 | 2017 | -0.15 | 0.01 | 0.005528 | 0.00003056 | 21.79113 | 0.01137  | 18.34 |
| 600992 | 2017 | 0.993 | 0.01 | 0.005528 | 0.00003056 | 21.53462 | 0.016144 | 23.46 |
| 600112 | 2017 | -0.23 | 0.01 | 0.005528 | 0.00003056 | 21.79113 | 0.01137  | 18.34 |
| 600519 | 2017 | 0.078 | 0.01 | 0.005528 | 0.00003056 | 24.89879 | 0.302088 | 61.99 |
| 600992 | 2017 | 0.993 | 0.01 | 0.005528 | 0.00003056 | 21.53462 | 0.016144 | 23.46 |
| 600112 | 2017 | -0.23 | 0.01 | 0.005528 | 0.00003056 | 21.36179 | 0.01137  | 18.34 |
| 2582   | 2017 | -0.04 | 0.02 | 1.553917 | 2.4146579  | 22.363   | 0.029735 | 30.59 |
| 603658 | 2017 | 0.411 | 0.02 | 1.553917 | 2.4146579  | 21.50594 | 0.26617  | 67.49 |
| 300259 | 2017 | -0.18 | 0.02 | 1.553917 | 2.4146579  | 21.55831 | 0.088639 | 35.62 |
| 603658 | 2017 | 0.102 | 0.02 | 1.553917 | 2.4146579  | 21.50594 | 0.26617  | 67.49 |
| 2132   | 2017 | -0.67 | 0.02 | 1.553917 | 2.4146579  | 22.24256 | 0.024134 | 29.12 |
| 300259 | 2017 | -0.18 | 0.02 | 1.553917 | 2.4146579  | 21.55831 | 0.088639 | 35.62 |
| 601677 | 2017 | -0.56 | 0.02 | 1.553917 | 2.4146579  | 22.87989 | 0.066725 | 17.95 |
| 300259 | 2017 | 0.046 | 0.02 | 1.553917 | 2.4146579  | 21.55831 | 0.088639 | 35.62 |
| 603508 | 2017 | 1.421 | 0.02 | 1.553917 | 2.4146579  | 21.73985 | 0.050496 | 25.01 |
| 603658 | 2017 | 0.956 | 0.02 | 1.553917 | 2.4146579  | 21.50594 | 0.26617  | 67.49 |
| 2431   | 2017 | 0.472 | 0.02 | 1.553917 | 2.4146579  | 23.47545 | 0.055082 | 11.1  |
| 600222 | 2017 | 0.074 | 0.02 | 1.553917 | 2.4146579  | 21.7558  | 0.004885 | 23.08 |
| 300179 | 2017 | -0.38 | 0.02 | 1.553917 | 2.4146579  | 20.70396 | 0.076289 | 28.23 |
| 300259 | 2017 | -0.18 | 0.02 | 1.553917 | 2.4146579  | 21.55831 | 0.088639 | 35.62 |
| 601717 | 2017 | -0.2  | 0.02 | 1.553917 | 2.4146579  | 23.67581 | 0.029387 | 30.08 |
| 603658 | 2017 | 0.602 | 0.02 | 1.553917 | 2.4146579  | 21.50594 | 0.26617  | 67.49 |
| 600066 | 2017 | -0.04 | 0.02 | 1.553917 | 2.4146579  | 24.31137 | 0.202991 | 37.19 |
| 600222 | 2017 | 0.408 | 0.02 | 1.553917 | 2.4146579  | 21.7558  | 0.004885 | 23.08 |
| 544    | 2017 | 0.56  | 0.02 | 1.553917 | 2.4146579  | 22.51243 | 0.058007 | 68.73 |
| 600595 | 2017 | -0.5  | 0.02 | 1.553917 | 2.4146579  | 23.9646  | -0.08688 | 53.92 |
| 600066 | 2017 | -0.45 | 0.02 | 1.553917 | 2.4146579  | 24.31137 | 0.202991 | 37.19 |
| 300064 | 2017 | -0.33 | 0.02 | 1.553917 | 2.4146579  | 22.90354 | 0.032228 | 20.46 |
| 300248 | 2017 | 0.342 | 0.02 | 1.553917 | 2.4146579  | 21.43528 | 0.087092 | 20.29 |
| 300259 | 2017 | -0.05 | 0.02 | 1.553917 | 2.4146579  | 21.55831 | 0.088639 | 35.62 |
| 300007 | 2017 | 0.481 | 0.02 | 1.553917 | 2.4146579  | 21.84894 | 0.078251 | 21.74 |
| 300248 | 2017 | 1.498 | 0.02 | 1.553917 | 2.4146579  | 21.43528 | 0.087092 | 20.29 |
| 603508 | 2017 | 1.373 | 0.02 | 1.553917 | 2.4146579  | 21.73985 | 0.050496 | 25.01 |
| 2132   | 2017 | -0.34 | 0.02 | 1.553917 | 2.4146579  | 22.58601 | 0.024134 | 29.12 |
| 601717 | 2017 | -0.64 | 0.02 | 1.553917 | 2.4146579  | 23.67581 | 0.029387 | 30.08 |
| 300179 | 2017 | -0.02 | 0.02 | 1.553917 | 2.4146579  | 20.70396 | 0.076289 | 28.23 |
| 603508 | 2017 | 0.822 | 0.02 | 1.553917 | 2.4146579  | 21.73985 | 0.050496 | 25.01 |
| 300007 | 2017 | 0.734 | 0.02 | 1.553917 | 2.4146579  | 22.17698 | 0.078251 | 21.74 |
| 300259 | 2017 | -0.18 | 0.02 | 1.553917 | 2.4146579  | 21.55831 | 0.088639 | 35.62 |
| 603658 | 2017 | 0.956 | 0.02 | 1.553917 | 2.4146579  | 21.47853 | 0.26617  | 67.49 |
| 603508 | 2017 | 1.012 | 0.02 | 1.553917 | 2.4146579  | 21.73985 | 0.050496 | 25.01 |
| 544    | 2017 | 0.56  | 0.02 | 1.553917 | 2.4146579  | 22.51243 | 0.058007 | 68.73 |
| 300248 | 2017 | 1.485 | 0.02 | 1.553917 | 2.4146579  | 21.43528 | 0.087092 | 20.29 |
| 300007 | 2017 | 0.509 | 0.02 | 1.553917 | 2.4146579  | 22.17698 | 0.078251 | 21.74 |

|        |      |       |      |          |           |          |          |       |
|--------|------|-------|------|----------|-----------|----------|----------|-------|
| 300259 | 2017 | 0.046 | 0.02 | 1.553917 | 2.4146579 | 21.55831 | 0.088639 | 35.62 |
| 600222 | 2017 | 0.069 | 0.02 | 1.553917 | 2.4146579 | 21.7558  | 0.004885 | 23.08 |
| 600066 | 2017 | -0.45 | 0.02 | 1.553917 | 2.41E+00  | 24.25137 | 0.202991 | 37.19 |
| 600595 | 2017 | -0.74 | 0.02 | 1.553917 | 2.41E+00  | 23.9646  | -0.08688 | 53.92 |
| 601717 | 2017 | -0.2  | 0.02 | 1.553917 | 2.41E+00  | 23.67581 | 0.029387 | 30.08 |
| 2582   | 2017 | 0.018 | 0.02 | 1.553917 | 2.4146579 | 22.363   | 0.029735 | 30.59 |
| 601677 | 2017 | -0.67 | 0.02 | 1.553917 | 2.4146579 | 22.87989 | 0.066725 | 17.95 |
| 2132   | 2017 | -0.08 | 0.02 | 1.553917 | 2.4146579 | 22.58601 | 0.024134 | 29.12 |
| 600066 | 2017 | -0.06 | 0.02 | 1.553917 | 2.4146579 | 24.31137 | 0.202991 | 37.19 |
| 2431   | 2017 | -0.52 | 0.02 | 1.553917 | 2.4146579 | 23.38981 | 0.055082 | 11.1  |
| 300248 | 2017 | 1.667 | 0.02 | 1.553917 | 2.4146579 | 21.43528 | 0.087092 | 20.29 |
| 2296   | 2017 | 0.875 | 0.02 | 1.553917 | 2.4146579 | 21.5337  | -0.1036  | 12.61 |
| 300480 | 2017 | 0.86  | 0.02 | 1.553917 | 2.4146579 | 20.43835 | 0.058086 | 47.88 |
| 300480 | 2017 | 0.86  | 0.02 | 1.553917 | 2.4146579 | 20.43835 | 0.058086 | 47.88 |
| 300480 | 2017 | 0.728 | 0.02 | 1.553917 | 2.4146579 | 20.43835 | 0.058086 | 47.88 |
| 2296   | 2017 | 1.419 | 0.02 | 1.553917 | 2.4146579 | 21.5337  | -0.1036  | 12.61 |
| 2132   | 2017 | -0.08 | 0.02 | 1.553917 | 2.4146579 | 22.58601 | 0.024134 | 29.12 |
| 300259 | 2017 | 0.046 | 0.02 | 1.553917 | 2.4146579 | 21.55831 | 0.088639 | 35.62 |
| 2431   | 2017 | -0.3  | 0.02 | 1.553917 | 2.4146579 | 23.47545 | 0.055082 | 11.1  |
| 603508 | 2017 | 0.822 | 0.02 | 1.553917 | 2.4146579 | 21.73985 | 0.050496 | 25.01 |
| 2296   | 2017 | 0.284 | 0.02 | 1.553917 | 2.4146579 | 21.5337  | -0.1036  | 12.61 |
| 600222 | 2017 | 0.744 | 0.02 | 1.553917 | 2.4146579 | 21.7558  | 0.004885 | 23.08 |
| 544    | 2017 | 0.56  | 0.02 | 1.553917 | 2.4146579 | 22.51243 | 0.058007 | 68.73 |
| 2582   | 2017 | -0.07 | 0.02 | 1.553917 | 2.4146579 | 22.21283 | 0.029735 | 30.59 |
| 2296   | 2017 | 0.889 | 0.02 | 1.553917 | 2.4146579 | 21.5337  | -0.1036  | 12.61 |
| 601717 | 2017 | -0.19 | 0.02 | 1.553917 | 2.4146579 | 23.40469 | 0.029387 | 30.08 |
| 603508 | 2017 | 1.471 | 0.02 | 1.553917 | 2.4146579 | 21.73985 | 0.050496 | 25.01 |
| 601717 | 2017 | -0.2  | 0.02 | 1.553917 | 2.4146579 | 23.67581 | 0.029387 | 30.08 |
| 300007 | 2017 | 0.481 | 0.02 | 1.553917 | 2.4146579 | 22.17698 | 0.078251 | 21.74 |
| 544    | 2017 | 0.56  | 0.02 | 1.553917 | 2.4146579 | 22.51243 | 0.058007 | 68.73 |
| 2296   | 2017 | 1.198 | 0.02 | 1.553917 | 2.4146579 | 21.5337  | -0.1036  | 12.61 |
| 300007 | 2017 | 0.481 | 0.02 | 1.553917 | 2.4146579 | 22.17698 | 0.078251 | 21.74 |
| 300007 | 2017 | 0.415 | 0.02 | 1.553917 | 2.4146579 | 22.17698 | 0.078251 | 21.74 |
| 300007 | 2017 | 0.358 | 0.02 | 1.553917 | 2.4146579 | 22.17698 | 0.078251 | 21.74 |
| 600222 | 2017 | 0.744 | 0.02 | 1.553917 | 2.4146579 | 21.7558  | 0.004885 | 23.08 |
| 300007 | 2017 | -0.25 | 0.02 | 1.553917 | 2.4146579 | 22.17698 | 0.078251 | 21.74 |
| 300007 | 2017 | 1.077 | 0.02 | 1.553917 | 2.4146579 | 22.17698 | 0.078251 | 21.74 |
| 2431   | 2017 | -0.04 | 0.02 | 1.553917 | 2.4146579 | 23.47545 | 0.055082 | 11.1  |
| 300007 | 2017 | 1.077 | 0.02 | 1.553917 | 2.4146579 | 22.17698 | 0.078251 | 21.74 |
| 600222 | 2017 | 0.401 | 0.02 | 1.553917 | 2.4146579 | 21.63286 | 0.004885 | 23.08 |
| 600066 | 2017 | -0.35 | 0.02 | 1.553917 | 2.4146579 | 24.31137 | 0.202991 | 37.19 |
| 600595 | 2017 | -0.88 | 0.02 | 1.553917 | 2.4146579 | 23.63148 | -0.08688 | 53.92 |
| 2431   | 2017 | 0.472 | 0.02 | 1.553917 | 2.4146579 | 23.47545 | 0.055082 | 11.1  |
| 2582   | 2017 | -0.04 | 0.02 | 1.553917 | 2.4146579 | 22.363   | 0.029735 | 30.59 |
| 300007 | 2017 | 0.481 | 0.02 | 1.553917 | 2.4146579 | 22.17698 | 0.078251 | 21.74 |
| 300007 | 2017 | -0.25 | 0.02 | 1.553917 | 2.4146579 | 22.17698 | 0.078251 | 21.74 |
| 300007 | 2017 | 0.415 | 0.02 | 1.553917 | 2.4146579 | 22.17698 | 0.078251 | 21.74 |
| 600066 | 2017 | -0.06 | 0.02 | 1.553917 | 2.4146579 | 24.31137 | 0.202991 | 37.19 |
| 2216   | 2017 | -0.86 | 0.02 | 1.553917 | 2.4146579 | 22.1963  | 0.035987 | 10.37 |
| 2216   | 2017 | -0.69 | 0.02 | 1.553917 | 2.4146579 | 21.90831 | 0.035987 | 10.37 |
| 300259 | 2017 | 0.046 | 0.02 | 1.553917 | 2.4146579 | 21.55831 | 0.088639 | 35.62 |
| 300007 | 2017 | 1.077 | 0.02 | 1.553917 | 2.4146579 | 22.17698 | 0.078251 | 21.74 |
| 601717 | 2017 | -0.11 | 0.02 | 1.553917 | 2.4146579 | 23.67581 | 0.029387 | 30.08 |
| 2132   | 2017 | -0.39 | 0.02 | 1.553917 | 2.4146579 | 22.58601 | 0.024134 | 29.12 |

|        |      |       |      |          |           |          |          |       |
|--------|------|-------|------|----------|-----------|----------|----------|-------|
| 601717 | 2017 | -0.64 | 0.02 | 1.553917 | 2.4146579 | 23.67581 | 0.029387 | 30.08 |
| 2431   | 2017 | 0.803 | 0.02 | 1.553917 | 2.4146579 | 23.47545 | 0.055082 | 11.1  |
| 600066 | 2017 | -0.47 | 0.02 | 1.553917 | 2.4146579 | 24.31137 | 0.202991 | 37.19 |
| 600222 | 2017 | -0.58 | 0.02 | 1.553917 | 2.4146579 | 21.7558  | 0.004885 | 23.08 |
| 601677 | 2017 | -0.67 | 0.02 | 1.553917 | 2.4146579 | 22.87989 | 0.066725 | 17.95 |
| 600595 | 2017 | -0.88 | 0.02 | 1.553917 | 2.4146579 | 23.9646  | -0.08688 | 53.92 |
| 300480 | 2017 | 0.198 | 0.02 | 1.553917 | 2.4146579 | 20.36941 | 0.058086 | 47.88 |
| 2431   | 2017 | -0.52 | 0.02 | 1.553917 | 2.4146579 | 23.47545 | 0.055082 | 11.1  |
| 300248 | 2017 | 0.342 | 0.02 | 1.553917 | 2.4146579 | 21.34355 | 0.087092 | 20.29 |
| 544    | 2017 | 0.56  | 0.02 | 1.553917 | 2.4146579 | 22.63442 | 0.058007 | 68.73 |
| 600595 | 2017 | -0.5  | 0.02 | 1.553917 | 2.4146579 | 23.9646  | -0.08688 | 53.92 |
| 601717 | 2017 | -0.2  | 0.02 | 1.553917 | 2.4146579 | 23.67581 | 0.029387 | 30.08 |
| 300480 | 2017 | 0.198 | 0.02 | 1.553917 | 2.4146579 | 20.43835 | 0.058086 | 47.88 |
| 300259 | 2017 | -0.18 | 0.02 | 1.553917 | 2.4146579 | 21.55831 | 0.088639 | 35.62 |
| 2431   | 2017 | -0.52 | 0.02 | 1.553917 | 2.4146579 | 23.47545 | 0.055082 | 11.1  |
| 2582   | 2017 | -0.07 | 0.02 | 1.553917 | 2.4146579 | 22.363   | 0.029735 | 30.59 |
| 300064 | 2017 | -0.33 | 0.02 | 1.553917 | 2.4146579 | 22.93072 | 0.032228 | 20.46 |
| 2582   | 2017 | 0.018 | 0.02 | 1.553917 | 2.4146579 | 22.363   | 0.029735 | 30.59 |
| 600595 | 2017 | -0.87 | 0.02 | 1.553917 | 2.4146579 | 23.9646  | -0.08688 | 53.92 |
| 300259 | 2017 | -0.05 | 0.02 | 1.553917 | 2.4146579 | 21.55831 | 0.088639 | 35.62 |
| 601677 | 2017 | -0.67 | 0.02 | 1.553917 | 2.4146579 | 22.87989 | 0.066725 | 17.95 |
| 601717 | 2017 | -0.2  | 0.02 | 1.553917 | 2.4146579 | 23.67581 | 0.029387 | 30.08 |
| 300007 | 2017 | 1.077 | 0.02 | 1.553917 | 2.4146579 | 22.17698 | 0.078251 | 21.74 |
| 2296   | 2017 | 0.871 | 0.02 | 1.553917 | 2.4146579 | 21.5337  | -0.1036  | 12.61 |
| 300179 | 2017 | -0.38 | 0.02 | 1.553917 | 2.4146579 | 20.72944 | 0.076289 | 28.23 |
| 2296   | 2017 | 0.094 | 0.02 | 1.553917 | 2.4146579 | 21.5337  | -0.1036  | 12.61 |
| 600222 | 2017 | 0.069 | 0.02 | 1.553917 | 2.4146579 | 21.7558  | 0.004885 | 23.08 |
| 2296   | 2017 | 0.725 | 0.02 | 1.553917 | 2.4146579 | 21.5337  | -0.1036  | 12.61 |
| 603658 | 2017 | 0.496 | 0.02 | 1.553917 | 2.4146579 | 21.50594 | 0.26617  | 67.49 |
| 300064 | 2017 | -0.33 | 0.02 | 1.553917 | 2.4146579 | 22.93072 | 0.032228 | 20.46 |
| 300259 | 2017 | -0.18 | 0.02 | 1.553917 | 2.4146579 | 21.55831 | 0.088639 | 35.62 |
| 300248 | 2017 | 1.498 | 0.02 | 1.553917 | 2.4146579 | 21.43528 | 0.087092 | 20.29 |
| 601717 | 2017 | -0.2  | 0.02 | 1.553917 | 2.4146579 | 23.67581 | 0.029387 | 30.08 |
| 601717 | 2017 | 0.686 | 0.02 | 1.553917 | 2.4146579 | 23.67581 | 0.029387 | 30.08 |
| 600595 | 2017 | -0.5  | 0.02 | 1.553917 | 2.4146579 | 23.9646  | -0.08688 | 53.92 |
| 300248 | 2017 | 1.667 | 0.02 | 1.553917 | 2.4146579 | 21.43528 | 0.087092 | 20.29 |
| 600595 | 2017 | -0.5  | 0.02 | 1.553917 | 2.4146579 | 23.9646  | -0.08688 | 53.92 |
| 2296   | 2017 | 0.889 | 0.02 | 1.553917 | 2.4146579 | 21.5337  | -0.1036  | 12.61 |
| 601717 | 2017 | -0.1  | 0.02 | 1.553917 | 2.4146579 | 23.67581 | 0.029387 | 30.08 |
| 601717 | 2017 | -0.2  | 0.02 | 1.553917 | 2.4146579 | 23.67581 | 0.029387 | 30.08 |
| 2431   | 2017 | -0.52 | 0.02 | 1.553917 | 2.4146579 | 23.47545 | 0.055082 | 11.1  |
| 601717 | 2017 | -0.1  | 0.02 | 1.553917 | 2.4146579 | 23.67581 | 0.029387 | 30.08 |
| 2296   | 2017 | 1.041 | 0.02 | 1.553917 | 2.4146579 | 21.5337  | -0.1036  | 12.61 |
| 601717 | 2017 | -0.2  | 0.02 | 1.553917 | 2.4146579 | 23.67581 | 0.029387 | 30.08 |
| 601717 | 2017 | -0.3  | 0.02 | 1.553917 | 2.4146579 | 23.67581 | 0.029387 | 30.08 |
| 300259 | 2017 | 0.016 | 0.02 | 1.553917 | 2.4146579 | 21.45039 | 0.088639 | 35.62 |
| 2296   | 2017 | 0.889 | 0.02 | 1.553917 | 2.4146579 | 21.49153 | -0.1036  | 12.61 |
| 2132   | 2017 | -0.2  | 0.02 | 1.553917 | 2.4146579 | 22.24256 | 0.024134 | 29.12 |
| 2216   | 2017 | -0.86 | 0.02 | 1.553917 | 2.4146579 | 22.1963  | 0.035987 | 10.37 |
| 300179 | 2017 | 0.138 | 0.02 | 1.553917 | 2.4146579 | 20.70396 | 0.076289 | 28.23 |
| 600595 | 2017 | -0.94 | 0.02 | 1.553917 | 2.4146579 | 23.9646  | -0.08688 | 53.92 |
| 603508 | 2017 | 0.822 | 0.02 | 1.553917 | 2.4146579 | 21.6808  | 0.050496 | 25.01 |
| 300179 | 2017 | 0.138 | 0.02 | 1.553917 | 2.4146579 | 20.70396 | 0.076289 | 28.23 |
| 603508 | 2017 | 1.522 | 0.02 | 1.553917 | 2.4146579 | 21.73985 | 0.050496 | 25.01 |

|        |      |       |      |          |            |          |          |       |
|--------|------|-------|------|----------|------------|----------|----------|-------|
| 603508 | 2017 | 1.012 | 0.02 | 1.553917 | 2.4146579  | 21.73985 | 0.050496 | 25.01 |
| 2132   | 2017 | -0.02 | 0.02 | 1.553917 | 2.4146579  | 22.58601 | 0.024134 | 29.12 |
| 2216   | 2017 | -0.7  | 0.02 | 1.553917 | 2.4146579  | 21.90831 | 0.035987 | 10.37 |
| 601717 | 2017 | -0.64 | 0.02 | 1.553917 | 2.4146579  | 23.67581 | 0.029387 | 30.08 |
| 601677 | 2017 | -0.83 | 0.02 | 1.553917 | 2.4146579  | 22.665   | 0.066725 | 17.95 |
| 300007 | 2017 | 0.481 | 0.02 | 1.553917 | 2.4146579  | 22.17698 | 0.078251 | 21.74 |
| 300007 | 2017 | 0.194 | 0.02 | 1.553917 | 2.4146579  | 22.17698 | 0.078251 | 21.74 |
| 300259 | 2017 | -0.18 | 0.02 | 1.553917 | 2.4146579  | 21.55831 | 0.088639 | 35.62 |
| 2431   | 2017 | -0.52 | 0.02 | 1.553917 | 2.4146579  | 23.47545 | 0.055082 | 11.1  |
| 2216   | 2017 | -0.69 | 0.02 | 1.553917 | 2.4146579  | 22.1963  | 0.035987 | 10.37 |
| 300007 | 2017 | 0.491 | 0.02 | 1.553917 | 2.4146579  | 22.17698 | 0.078251 | 21.74 |
| 601717 | 2017 | 0.496 | 0.02 | 1.553917 | 2.4146579  | 23.67581 | 0.029387 | 30.08 |
| 2716   | 2017 | 0.879 | 0.04 | 1.492186 | 2.22662    | 22.98253 | 0.068023 | 32.56 |
| 2716   | 2017 | 0.879 | 0.04 | 1.492186 | 2.22662    | 22.91932 | 0.068023 | 32.56 |
| 2716   | 2017 | 0.879 | 0.04 | 1.492186 | 2.22662    | 22.98253 | 0.068023 | 32.56 |
| 683    | 2017 | -0.88 | 0    | 0.994203 | 0.98843995 | 23.81605 | 0.089206 | 33.34 |
| 683    | 2017 | -0.84 | 0    | 0.994203 | 0.98843995 | 23.81605 | 0.089206 | 33.34 |
| 600295 | 2017 | -0.58 | 0    | 0.994203 | 0.98843995 | 24.55323 | 0.074779 | 40.7  |
| 683    | 2017 | -0.84 | 0    | 0.994203 | 0.98843995 | 23.81605 | 0.089206 | 33.34 |
| 683    | 2017 | -0.78 | 0    | 0.994203 | 0.98843995 | 23.81605 | 0.089206 | 33.34 |
| 600295 | 2017 | 0.412 | 0    | 0.994203 | 0.98843995 | 24.55323 | 0.074779 | 40.7  |
| 683    | 2017 | -0.88 | 0    | 0.994203 | 0.98843995 | 23.81605 | 0.089206 | 33.34 |
| 600295 | 2017 | -0.85 | 0    | 0.994203 | 0.98843995 | 24.55323 | 0.074779 | 40.7  |
| 600295 | 2017 | 0.412 | 0    | 0.994203 | 0.98843995 | 23.44583 | 0.074779 | 40.7  |
| 683    | 2017 | -0.84 | 0    | 0.994203 | 0.98843995 | 23.09169 | 0.089206 | 33.34 |
| 683    | 2017 | -0.84 | 0    | 0.994203 | 0.98843995 | 23.81605 | 0.089206 | 33.34 |
| 600295 | 2017 | -0.42 | 0    | 0.994203 | 0.98843995 | 24.55323 | 0.074779 | 40.7  |
| 683    | 2017 | -0.84 | 0    | 0.994203 | 0.98843995 | 23.81605 | 0.089206 | 33.34 |
| 600295 | 2017 | -0.42 | 0    | 0.994203 | 0.98843995 | 24.55323 | 0.074779 | 40.7  |
| 600295 | 2017 | -0.42 | 0    | 0.994203 | 0.98843995 | 24.55323 | 0.074779 | 40.7  |
| 600295 | 2017 | -0.85 | 0    | 0.994203 | 0.98843995 | 24.55323 | 0.074779 | 40.7  |
| 600086 | 2017 | -0.39 | 0.03 | 0.190238 | 0.03619036 | 22.8817  | 0.071535 | 31.78 |
| 2694   | 2017 | -0.84 | 0.03 | 0.190238 | 0.03619036 | 21.75699 | 0.094741 | 25.72 |
| 2694   | 2017 | -0.58 | 0.03 | 0.190238 | 0.03619036 | 21.75699 | 0.094741 | 25.72 |
| 2694   | 2017 | -0.58 | 0.03 | 0.190238 | 0.03619036 | 21.75699 | 0.094741 | 25.72 |
| 2694   | 2017 | -0.58 | 0.03 | 0.190238 | 0.03619036 | 21.75699 | 0.094741 | 25.72 |
| 2694   | 2017 | -0.84 | 0.03 | 0.190238 | 0.03619036 | 21.75699 | 0.094741 | 25.72 |
| 2694   | 2017 | -0.58 | 0.03 | 0.190238 | 0.03619036 | 21.50403 | 0.094741 | 25.72 |
| 2694   | 2017 | -0.58 | 0.03 | 0.190238 | 0.03619036 | 21.75699 | 0.094741 | 25.72 |
| 600086 | 2017 | -0.39 | 0.03 | 0.190238 | 0.03619036 | 23.25064 | 0.071535 | 31.78 |
| 2694   | 2017 | -0.65 | 0.03 | 0.190238 | 0.03619036 | 21.75699 | 0.094741 | 25.72 |
| 2694   | 2017 | -0.58 | 0.03 | 0.190238 | 0.03619036 | 21.75699 | 0.094741 | 25.72 |
| 600086 | 2017 | -0.39 | 0.03 | 0.190238 | 0.03619036 | 23.25064 | 0.071535 | 31.78 |
| 2056   | 2017 | 0.299 | 0.05 | 0.21197  | 0.04493135 | 22.60256 | 0.126534 | 50.15 |
| 2779   | 2017 | -0.36 | 0.05 | 0.21197  | 0.04493135 | 20.54889 | 0.037553 | 51.55 |
| 2619   | 2017 | 0.289 | 0.05 | 0.21197  | 0.04493135 | 22.65917 | 0.071287 | 12.07 |
| 2634   | 2017 | -0.13 | 0.05 | 0.21197  | 0.04493135 | 20.61951 | 0.061804 | 37.5  |
| 600572 | 2017 | 0.613 | 0.05 | 0.21197  | 0.04493135 | 22.96612 | 0.124917 | 28.17 |
| 2615   | 2017 | -0.49 | 0.05 | 0.21197  | 0.04493135 | 21.22791 | 0.126442 | 48.4  |
| 300027 | 2017 | -0.24 | 0.05 | 0.21197  | 0.04493135 | 23.7267  | 0.093539 | 20.84 |
| 2632   | 2017 | 0.083 | 0.05 | 0.21197  | 0.04493135 | 21.53971 | 0.066823 | 40.98 |
| 2632   | 2017 | -0.01 | 0.05 | 0.21197  | 0.04493135 | 21.53971 | 0.066823 | 40.98 |
| 300234 | 2017 | 0.231 | 0.05 | 0.21197  | 0.04493135 | 20.91749 | -0.01199 | 33.36 |
| 2703   | 2017 | 0.774 | 0.05 | 0.21197  | 0.04493135 | 21.46731 | 0.017954 | 43.56 |

|        |      |       |      |         |            |          |          |       |
|--------|------|-------|------|---------|------------|----------|----------|-------|
| 2632   | 2017 | -0.6  | 0.05 | 0.21197 | 0.04493135 | 21.53971 | 0.066823 | 40.98 |
| 601113 | 2017 | 0.727 | 0.05 | 0.21197 | 0.04493135 | 22.29481 | 0.036444 | 40.52 |
| 601113 | 2017 | 0.727 | 0.05 | 0.21197 | 0.04493135 | 22.29481 | 0.036444 | 40.52 |
| 300234 | 2017 | 0.231 | 0.05 | 0.21197 | 0.04493135 | 20.91749 | -0.01199 | 33.36 |
| 300234 | 2017 | 0.231 | 0.05 | 0.21197 | 0.04493135 | 20.91749 | -0.01199 | 33.36 |
| 600572 | 2017 | 0.613 | 0.05 | 0.21197 | 0.04493135 | 22.96612 | 0.124917 | 28.17 |
| 300027 | 2017 | 0.292 | 0.05 | 0.21197 | 0.04493135 | 23.7267  | 0.093539 | 20.84 |
| 600572 | 2017 | 0.613 | 0.05 | 0.21197 | 0.04493135 | 22.96612 | 0.124917 | 28.17 |
| 2634   | 2017 | 0.007 | 0.05 | 0.21197 | 0.04493135 | 20.86236 | 0.061804 | 37.5  |
| 2632   | 2017 | 0.105 | 0.05 | 0.21197 | 0.04493135 | 21.53971 | 0.066823 | 40.98 |
| 2199   | 2017 | 0.652 | 0.05 | 0.21197 | 0.04493135 | 20.10336 | 0.003237 | 14.8  |
| 601113 | 2017 | 0.727 | 0.05 | 0.21197 | 0.04493135 | 22.29481 | 0.036444 | 40.52 |
| 2434   | 2017 | 0.733 | 0.05 | 0.21197 | 0.04493135 | 22.93328 | 0.105055 | 28.45 |
| 2056   | 2017 | 0.299 | 0.05 | 0.21197 | 0.04493135 | 22.60256 | 0.126534 | 50.15 |
| 2434   | 2017 | 0.236 | 0.05 | 0.21197 | 0.04493135 | 22.93328 | 0.105055 | 28.45 |
| 600572 | 2017 | 0.613 | 0.05 | 0.21197 | 0.04493135 | 22.96612 | 0.124917 | 28.17 |
| 600668 | 2017 | 0.145 | 0.05 | 0.21197 | 0.04493135 | 22.15256 | 0.137066 | 16.15 |
| 2619   | 2017 | 0.289 | 0.05 | 0.21197 | 0.04493135 | 22.65917 | 0.071287 | 12.07 |
| 2779   | 2017 | -0.36 | 0.05 | 0.21197 | 0.04493135 | 20.54889 | 0.037553 | 51.55 |
| 601113 | 2017 | 0.727 | 0.05 | 0.21197 | 0.04493135 | 22.17147 | 0.036444 | 40.52 |
| 2634   | 2017 | -0.21 | 0.05 | 0.21197 | 0.04493135 | 20.86236 | 0.061804 | 37.5  |
| 600668 | 2017 | 0.543 | 0.05 | 0.21197 | 0.04493135 | 22.15256 | 0.137066 | 16.15 |
| 980    | 2017 | -0.46 | 0.05 | 0.21197 | 0.04493135 | 24.22858 | 0.074241 | 38.86 |
| 2632   | 2017 | 0.105 | 0.05 | 0.21197 | 0.04493135 | 21.53971 | 0.066823 | 40.98 |
| 980    | 2017 | -0.67 | 0.05 | 0.21197 | 0.04493135 | 24.22858 | 0.074241 | 38.86 |
| 2615   | 2017 | -0.49 | 0.05 | 0.21197 | 0.04493135 | 21.22791 | 0.126442 | 48.4  |
| 2703   | 2017 | 0.774 | 0.05 | 0.21197 | 0.04493135 | 21.46731 | 0.017954 | 43.56 |
| 600572 | 2017 | 0.613 | 0.05 | 0.21197 | 0.04493135 | 22.96612 | 0.124917 | 28.17 |
| 739    | 2017 | 0.665 | 0.05 | 0.21197 | 0.04493135 | 22.46217 | 0.084129 | 26.74 |
| 600572 | 2017 | 0.171 | 0.05 | 0.21197 | 0.04493135 | 22.96612 | 0.124917 | 28.17 |
| 739    | 2017 | 0.665 | 0.05 | 0.21197 | 0.04493135 | 22.46217 | 0.084129 | 26.74 |
| 980    | 2017 | -0.46 | 0.05 | 0.21197 | 0.04493135 | 24.22858 | 0.074241 | 38.86 |
| 300027 | 2017 | 0.231 | 0.05 | 0.21197 | 0.04493135 | 23.7267  | 0.093539 | 20.84 |
| 600572 | 2017 | 0.613 | 0.05 | 0.21197 | 0.04493135 | 22.96612 | 0.124917 | 28.17 |
| 2632   | 2017 | 0.503 | 0.05 | 0.21197 | 0.04493135 | 21.53971 | 0.066823 | 40.98 |
| 2199   | 2017 | 0.652 | 0.05 | 0.21197 | 0.04493135 | 20.18406 | 0.003237 | 14.8  |
| 739    | 2017 | 0.665 | 0.05 | 0.21197 | 0.04493135 | 22.46217 | 0.084129 | 26.74 |
| 2619   | 2017 | 0.289 | 0.05 | 0.21197 | 0.04493135 | 22.51095 | 0.071287 | 12.07 |
| 300234 | 2017 | 0.231 | 0.05 | 0.21197 | 0.04493135 | 20.91749 | -0.01199 | 33.36 |
| 2199   | 2017 | 0.652 | 0.05 | 0.21197 | 0.04493135 | 20.18406 | 0.003237 | 14.8  |
| 2632   | 2017 | 0.194 | 0.05 | 0.21197 | 0.04493135 | 21.53971 | 0.066823 | 40.98 |
| 600572 | 2017 | 0.018 | 0.05 | 0.21197 | 0.04493135 | 22.96612 | 0.124917 | 28.17 |
| 2615   | 2017 | -0.53 | 0.05 | 0.21197 | 0.04493135 | 21.22791 | 0.126442 | 48.4  |
| 2056   | 2017 | 0.299 | 0.05 | 0.21197 | 0.04493135 | 22.60256 | 0.126534 | 50.15 |
| 600572 | 2017 | 0.613 | 0.05 | 0.21197 | 0.04493135 | 22.96612 | 0.124917 | 28.17 |
| 2634   | 2017 | 0.007 | 0.05 | 0.21197 | 0.04493135 | 20.86236 | 0.061804 | 37.5  |
| 2632   | 2017 | -0.6  | 0.05 | 0.21197 | 0.04493135 | 21.4712  | 0.066823 | 40.98 |
| 2632   | 2017 | 0.123 | 0.05 | 0.21197 | 0.04493135 | 21.53971 | 0.066823 | 40.98 |
| 2703   | 2017 | -0.42 | 0.05 | 0.21197 | 0.04493135 | 20.85569 | 0.017954 | 43.56 |
| 2199   | 2017 | 0.652 | 0.05 | 0.21197 | 0.04493135 | 20.18406 | 0.003237 | 14.8  |
| 739    | 2017 | 0.268 | 0.05 | 0.21197 | 0.04493135 | 22.46217 | 0.084129 | 26.74 |
| 600572 | 2017 | -0.61 | 0.05 | 0.21197 | 0.04493135 | 22.96612 | 0.124917 | 28.17 |
| 739    | 2017 | 0.665 | 0.05 | 0.21197 | 0.04493135 | 22.46217 | 0.084129 | 26.74 |
| 600572 | 2017 | 0.282 | 0.05 | 0.21197 | 0.04493135 | 22.96612 | 0.124917 | 28.17 |



|        |      |       |      |         |            |          |          |       |
|--------|------|-------|------|---------|------------|----------|----------|-------|
| 2703   | 2017 | 0.025 | 0.05 | 0.21197 | 0.04493135 | 21.46731 | 0.017954 | 43.56 |
| 600668 | 2017 | 0.543 | 0.05 | 0.21197 | 0.04493135 | 22.15256 | 0.137066 | 16.15 |
| 980    | 2017 | -0.67 | 0.05 | 0.21197 | 0.04493135 | 23.53621 | 0.074241 | 38.86 |
| 300027 | 2017 | 0.182 | 0.05 | 0.21197 | 0.04493135 | 23.7267  | 0.093539 | 20.84 |
| 600572 | 2017 | 0.613 | 0.05 | 0.21197 | 0.04493135 | 22.96612 | 0.124917 | 28.17 |
| 739    | 2017 | 0.665 | 0.05 | 0.21197 | 0.04493135 | 21.55767 | 0.084129 | 26.74 |
| 600668 | 2017 | -0.02 | 0.05 | 0.21197 | 0.04493135 | 22.15256 | 0.137066 | 16.15 |
| 739    | 2017 | 0.665 | 0.05 | 0.21197 | 0.04493135 | 22.46217 | 0.084129 | 26.74 |
| 739    | 2017 | 0.665 | 0.05 | 0.21197 | 0.04493135 | 22.46217 | 0.084129 | 26.74 |
| 2056   | 2017 | 0.299 | 0.05 | 0.21197 | 0.04493135 | 22.60256 | 0.126534 | 50.15 |
| 2056   | 2017 | 0.299 | 0.05 | 0.21197 | 0.04493135 | 22.59124 | 0.126534 | 50.15 |
| 2615   | 2017 | -0.51 | 0.05 | 0.21197 | 0.04493135 | 21.22791 | 0.126442 | 48.4  |
| 2779   | 2017 | -0.36 | 0.05 | 0.21197 | 0.04493135 | 20.54889 | 0.037553 | 51.55 |
| 600668 | 2017 | 0.543 | 0.05 | 0.21197 | 0.04493135 | 22.15256 | 0.137066 | 16.15 |
| 2619   | 2017 | 0.289 | 0.05 | 0.21197 | 0.04493135 | 22.65917 | 0.071287 | 12.07 |
| 600572 | 2017 | 0.613 | 0.05 | 0.21197 | 0.04493135 | 22.96612 | 0.124917 | 28.17 |
| 739    | 2017 | 0.665 | 0.05 | 0.21197 | 0.04493135 | 22.46217 | 0.084129 | 26.74 |
| 600668 | 2017 | 0.543 | 0.05 | 0.21197 | 0.04493135 | 22.15256 | 0.137066 | 16.15 |
| 600572 | 2017 | 0.613 | 0.05 | 0.21197 | 0.04493135 | 22.96612 | 0.124917 | 28.17 |
| 600572 | 2017 | -0.71 | 0.05 | 0.21197 | 0.04493135 | 22.96612 | 0.124917 | 28.17 |
| 600572 | 2017 | 0.613 | 0.05 | 0.21197 | 0.04493135 | 22.91502 | 0.124917 | 28.17 |
| 2703   | 2017 | -0.55 | 0.05 | 0.21197 | 0.04493135 | 21.46731 | 0.017954 | 43.56 |
| 739    | 2017 | 0.665 | 0.05 | 0.21197 | 0.04493135 | 22.46217 | 0.084129 | 26.74 |
| 739    | 2017 | 0.665 | 0.05 | 0.21197 | 0.04493135 | 22.46217 | 0.084129 | 26.74 |
| 739    | 2017 | -0.47 | 0.05 | 0.21197 | 0.04493135 | 22.46217 | 0.084129 | 26.74 |
| 2199   | 2017 | 0.652 | 0.05 | 0.21197 | 0.04493135 | 20.18406 | 0.003237 | 14.8  |
| 600572 | 2017 | 0.613 | 0.05 | 0.21197 | 0.04493135 | 22.96612 | 0.124917 | 28.17 |
| 2434   | 2017 | -0.28 | 0.05 | 0.21197 | 0.04493135 | 22.93328 | 0.105055 | 28.45 |
| 600668 | 2017 | -0.45 | 0.05 | 0.21197 | 0.04493135 | 22.15256 | 0.137066 | 16.15 |
| 2634   | 2017 | -0.21 | 0.05 | 0.21197 | 0.04493135 | 20.86236 | 0.061804 | 37.5  |
| 2632   | 2017 | 0.105 | 0.05 | 0.21197 | 0.04493135 | 21.53971 | 0.066823 | 40.98 |
| 2615   | 2017 | -0.51 | 0.05 | 0.21197 | 0.04493135 | 21.09326 | 0.126442 | 48.4  |
| 2434   | 2017 | 0.733 | 0.05 | 0.21197 | 0.04493135 | 22.93328 | 0.105055 | 28.45 |
| 2434   | 2017 | -0.06 | 0.05 | 0.21197 | 0.04493135 | 22.93328 | 0.105055 | 28.45 |
| 980    | 2017 | -0.37 | 0.05 | 0.21197 | 0.04493135 | 24.22858 | 0.074241 | 38.86 |
| 980    | 2017 | -0.67 | 0.05 | 0.21197 | 0.04493135 | 24.22858 | 0.074241 | 38.86 |
| 739    | 2017 | 0.665 | 0.05 | 0.21197 | 0.04493135 | 22.46217 | 0.084129 | 26.74 |
| 2632   | 2017 | 0.105 | 0.05 | 0.21197 | 0.04493135 | 21.53971 | 0.066823 | 40.98 |
| 2615   | 2017 | -0.51 | 0.05 | 0.21197 | 0.04493135 | 21.22791 | 0.126442 | 48.4  |
| 739    | 2017 | 0.665 | 0.05 | 0.21197 | 0.04493135 | 22.46217 | 0.084129 | 26.74 |
| 601113 | 2017 | 0.727 | 0.05 | 0.21197 | 0.04493135 | 22.29481 | 0.036444 | 40.52 |
| 600668 | 2017 | 0.543 | 0.05 | 0.21197 | 0.04493135 | 22.15256 | 0.137066 | 16.15 |
| 600572 | 2017 | 0.613 | 0.05 | 0.21197 | 0.04493135 | 22.96612 | 0.124917 | 28.17 |
| 2434   | 2017 | -0.04 | 0.05 | 0.21197 | 0.04493135 | 22.93328 | 0.105055 | 28.45 |
| 600668 | 2017 | 0.543 | 0.05 | 0.21197 | 0.04493135 | 21.72869 | 0.137066 | 16.15 |
| 739    | 2017 | 0.665 | 0.05 | 0.21197 | 0.04493135 | 22.46217 | 0.084129 | 26.74 |
| 600668 | 2017 | -0.02 | 0.05 | 0.21197 | 0.04493135 | 22.15256 | 0.137066 | 16.15 |
| 2615   | 2017 | -0.53 | 0.05 | 0.21197 | 0.04493135 | 21.22791 | 0.126442 | 48.4  |
| 2434   | 2017 | 0.417 | 0.05 | 0.21197 | 0.04493135 | 22.93328 | 0.105055 | 28.45 |
| 600572 | 2017 | 0.613 | 0.05 | 0.21197 | 0.04493135 | 22.96612 | 0.124917 | 28.17 |
| 600668 | 2017 | -0.45 | 0.05 | 0.21197 | 0.04493135 | 22.15256 | 0.137066 | 16.15 |
| 300027 | 2017 | -0.24 | 0.05 | 0.21197 | 0.04493135 | 23.50131 | 0.093539 | 20.84 |
| 2434   | 2017 | -0.28 | 0.05 | 0.21197 | 0.04493135 | 22.93328 | 0.105055 | 28.45 |
| 300027 | 2017 | -0.24 | 0.05 | 0.21197 | 0.04493135 | 23.7267  | 0.093539 | 20.84 |

|        |      |       |      |          |            |          |          |       |
|--------|------|-------|------|----------|------------|----------|----------|-------|
| 2703   | 2017 | 0.112 | 0.05 | 0.21197  | 0.04493135 | 21.46731 | 0.017954 | 43.56 |
| 2434   | 2017 | -0.26 | 0.05 | 0.21197  | 0.04493135 | 22.93328 | 0.105055 | 28.45 |
| 739    | 2017 | 0.304 | 0.05 | 0.21197  | 0.04493135 | 22.46217 | 0.084129 | 26.74 |
| 2703   | 2017 | 0.025 | 0.05 | 0.21197  | 0.04493135 | 21.46731 | 0.017954 | 43.56 |
| 601113 | 2017 | 0.727 | 0.05 | 0.21197  | 0.04493135 | 22.29481 | 0.036444 | 40.52 |
| 300234 | 2017 | 0.231 | 0.05 | 0.21197  | 0.04493135 | 20.90693 | -0.01199 | 33.36 |
| 2632   | 2017 | 0.105 | 0.05 | 0.21197  | 0.04493135 | 21.53971 | 0.066823 | 40.98 |
| 600572 | 2017 | 0.447 | 0.05 | 0.21197  | 0.04493135 | 22.96612 | 0.124917 | 28.17 |
| 600572 | 2017 | -0.16 | 0.05 | 0.21197  | 0.04493135 | 22.96612 | 0.124917 | 28.17 |
| 2199   | 2017 | 0.652 | 0.05 | 0.21197  | 0.04493135 | 20.18406 | 0.003237 | 14.8  |
| 2619   | 2017 | 0.289 | 0.05 | 0.21197  | 0.04493135 | 22.65917 | 0.071287 | 12.07 |
| 2434   | 2017 | -0.26 | 0.05 | 0.21197  | 0.04493135 | 22.78672 | 0.105055 | 28.45 |
| 2615   | 2017 | -0.49 | 0.05 | 0.21197  | 0.04493135 | 21.22791 | 0.126442 | 48.4  |
| 600470 | 2017 | -0.24 | 0.04 | 1.500042 | 2.2501251  | 22.42955 | 0.020313 | 25.49 |
| 630    | 2017 | -0.15 | 0.04 | 1.500042 | 2.2501251  | 24.59016 | 0.039903 | 36.53 |
| 630    | 2017 | -0.81 | 0.04 | 1.500042 | 2.2501251  | 24.59016 | 0.039903 | 36.53 |
| 630    | 2017 | -0.4  | 0.04 | 1.500042 | 2.2501251  | 24.59016 | 0.039903 | 36.53 |
| 600577 | 2017 | -0.29 | 0.04 | 1.500042 | 2.2501251  | 22.47699 | 0.123985 | 21.8  |
| 630    | 2017 | -0.48 | 0.04 | 1.500042 | 2.2501251  | 24.59016 | 0.039903 | 36.53 |
| 630    | 2017 | -0.56 | 0.04 | 1.500042 | 2.2501251  | 24.59016 | 0.039903 | 36.53 |
| 630    | 2017 | -0.81 | 0.04 | 1.500042 | 2.2501251  | 24.59016 | 0.039903 | 36.53 |
| 600470 | 2017 | -0.42 | 0.04 | 1.500042 | 2.2501251  | 22.42955 | 0.020313 | 25.49 |
| 630    | 2017 | -0.15 | 0.04 | 1.500042 | 2.2501251  | 24.59016 | 0.039903 | 36.53 |
| 600237 | 2017 | 0.364 | 0.04 | 1.500042 | 2.2501251  | 21.30521 | 0.011414 | 16.76 |
| 2136   | 2017 | -0.58 | 0.04 | 1.500042 | 2.2501251  | 20.71344 | 0.246266 | 30.91 |
| 2136   | 2017 | -0.25 | 0.04 | 1.500042 | 2.2501251  | 20.71344 | 0.246266 | 30.91 |
| 600470 | 2017 | 0.233 | 0.04 | 1.500042 | 2.2501251  | 22.42955 | 0.020313 | 25.49 |
| 630    | 2017 | -0.81 | 0.04 | 1.500042 | 2.2501251  | 24.59016 | 0.039903 | 36.53 |
| 600470 | 2017 | -0.59 | 0.04 | 1.500042 | 2.2501251  | 22.42955 | 0.020313 | 25.49 |
| 630    | 2017 | -0.81 | 0.04 | 1.500042 | 2.2501251  | 24.28961 | 0.039903 | 36.53 |
| 600577 | 2017 | -0.29 | 0.04 | 1.500042 | 2.2501251  | 22.47699 | 0.123985 | 21.8  |
| 600470 | 2017 | -0.59 | 0.04 | 1.500042 | 2.2501251  | 22.42955 | 0.020313 | 25.49 |
| 2136   | 2017 | -0.25 | 0.04 | 1.500042 | 2.2501251  | 20.63605 | 0.246266 | 30.91 |
| 600577 | 2017 | 0.108 | 0.04 | 1.500042 | 2.2501251  | 22.47699 | 0.123985 | 21.8  |
| 2136   | 2017 | -0.58 | 0.04 | 1.500042 | 2.2501251  | 20.71344 | 0.246266 | 30.91 |
| 600577 | 2017 | -0.29 | 0.04 | 1.500042 | 2.2501251  | 22.47699 | 0.123985 | 21.8  |
| 600577 | 2017 | -0.29 | 0.04 | 1.500042 | 2.2501251  | 22.47699 | 0.123985 | 21.8  |
| 600577 | 2017 | 0.596 | 0.04 | 1.500042 | 2.2501251  | 22.47699 | 0.123985 | 21.8  |
| 600470 | 2017 | 0.517 | 0.04 | 1.500042 | 2.2501251  | 22.026   | 0.020313 | 25.49 |
| 630    | 2017 | -0.81 | 0.04 | 1.500042 | 2.2501251  | 24.59016 | 0.039903 | 36.53 |
| 2136   | 2017 | -0.36 | 0.04 | 1.500042 | 2.2501251  | 20.71344 | 0.246266 | 30.91 |
| 600470 | 2017 | -0.59 | 0.04 | 1.500042 | 2.2501251  | 22.42955 | 0.020313 | 25.49 |
| 630    | 2017 | 0.07  | 0.04 | 1.500042 | 2.2501251  | 24.59016 | 0.039903 | 36.53 |
| 600470 | 2017 | -0.48 | 0.04 | 1.500042 | 2.2501251  | 22.42955 | 0.020313 | 25.49 |
| 600577 | 2017 | -0.29 | 0.04 | 1.500042 | 2.2501251  | 22.47699 | 0.123985 | 21.8  |
| 630    | 2017 | 0.07  | 0.04 | 1.500042 | 2.2501251  | 24.59016 | 0.039903 | 36.53 |
| 600237 | 2017 | -0.63 | 0.04 | 1.500042 | 2.2501251  | 21.42341 | 0.011414 | 16.76 |
| 630    | 2017 | -0.59 | 0.04 | 1.500042 | 2.2501251  | 24.59016 | 0.039903 | 36.53 |
| 630    | 2017 | -0.81 | 0.04 | 1.500042 | 2.2501251  | 24.59016 | 0.039903 | 36.53 |
| 600470 | 2017 | -0.81 | 0.04 | 1.500042 | 2.2501251  | 22.42955 | 0.020313 | 25.49 |
| 600577 | 2017 | 0.596 | 0.04 | 1.500042 | 2.2501251  | 22.47699 | 0.123985 | 21.8  |
| 600237 | 2017 | 0.39  | 0.04 | 1.500042 | 2.2501251  | 21.42341 | 0.011414 | 16.76 |
| 600577 | 2017 | -0.29 | 0.04 | 1.500042 | 2.2501251  | 22.47699 | 0.123985 | 21.8  |
| 600577 | 2017 | 0.108 | 0.04 | 1.500042 | 2.2501251  | 21.65192 | 0.123985 | 21.8  |

|        |      |       |      |          |            |          |          |       |
|--------|------|-------|------|----------|------------|----------|----------|-------|
| 630    | 2017 | 0.512 | 0.04 | 1.500042 | 2.2501251  | 24.59016 | 0.039903 | 36.53 |
| 600470 | 2017 | 0.233 | 0.04 | 1.500042 | 2.2501251  | 22.42955 | 0.020313 | 25.49 |
| 600577 | 2017 | -0.14 | 0.04 | 1.500042 | 2.2501251  | 22.47699 | 0.123985 | 21.8  |
| 600237 | 2017 | 0.277 | 0.04 | 1.500042 | 2.2501251  | 21.42341 | 0.011414 | 16.76 |
| 600237 | 2017 | 0.39  | 0.04 | 1.500042 | 2.2501251  | 21.42341 | 0.011414 | 16.76 |
| 630    | 2017 | 0.07  | 0.04 | 1.500042 | 2.2501251  | 24.59016 | 0.039903 | 36.53 |
| 600237 | 2017 | 0.033 | 0.04 | 1.500042 | 2.2501251  | 21.42341 | 0.011414 | 16.76 |
| 630    | 2017 | 0.07  | 0.04 | 1.500042 | 2.2501251  | 24.59016 | 0.039903 | 36.53 |
| 595    | 2017 | 0.263 | 0    | 0.510826 | 0.26094302 | 21.3542  | 0.036138 | 53.05 |
| 595    | 2017 | 0.326 | 0    | 0.510826 | 0.26094302 | 21.3542  | 0.036138 | 53.05 |
| 595    | 2017 | 0.704 | 0    | 0.510826 | 0.26094302 | 21.3542  | 0.036138 | 53.05 |
| 862    | 2017 | -0.43 | 0    | 0.510826 | 0.26094302 | 22.94017 | -0.07206 | 40.23 |
| 595    | 2017 | 0.326 | 0    | 0.510826 | 0.26094302 | 21.3542  | 0.036138 | 53.05 |
| 862    | 2017 | -0.43 | 0    | 0.510826 | 0.26094302 | 22.94017 | -0.07206 | 40.23 |
| 862    | 2017 | -0.43 | 0    | 0.510826 | 0.26094302 | 22.94017 | -0.07206 | 40.23 |
| 815    | 2017 | -0.74 | 0    | 0.510826 | 0.26094302 | 21.75206 | 0.012658 | 20.86 |
| 862    | 2017 | -0.43 | 0    | 0.510826 | 0.26094302 | 22.66997 | -0.07206 | 40.23 |
| 595    | 2017 | 0.704 | 0    | 0.510826 | 0.26094302 | 21.2532  | 0.036138 | 53.05 |
| 862    | 2017 | -0.43 | 0    | 0.510826 | 0.26094302 | 22.94017 | -0.07206 | 40.23 |
| 815    | 2017 | -0.49 | 0    | 0.510826 | 0.26094302 | 21.75206 | 0.012658 | 20.86 |
| 862    | 2017 | -0.43 | 0    | 0.510826 | 0.26094302 | 22.94017 | -0.07206 | 40.23 |
| 815    | 2017 | -0.93 | 0    | 0.510826 | 0.26094302 | 21.69671 | 0.012658 | 20.86 |
| 862    | 2017 | -0.43 | 0    | 0.510826 | 0.26094302 | 22.94017 | -0.07206 | 40.23 |
| 815    | 2017 | -0.93 | 0    | 0.510826 | 0.26094302 | 21.75206 | 0.012658 | 20.86 |
| 862    | 2017 | -0.43 | 0    | 0.510826 | 0.26094302 | 22.94017 | -0.07206 | 40.23 |
| 862    | 2017 | -0.43 | 0    | 0.510826 | 0.26094302 | 22.94017 | -0.07206 | 40.23 |
| 815    | 2017 | -0.49 | 0    | 0.510826 | 0.26094302 | 21.75206 | 0.012658 | 20.86 |
| 595    | 2017 | 0.704 | 0    | 0.510826 | 0.26094302 | 21.3542  | 0.036138 | 53.05 |
| 603399 | 2017 | -0.3  | 0    | 0.069101 | 0.00477489 | 22.21264 | 0.102099 | 32    |
| 603399 | 2017 | -0.3  | 0    | 0.069101 | 0.00477489 | 22.21264 | 0.102099 | 32    |
| 603399 | 2017 | -0.3  | 0    | 0.069101 | 0.00477489 | 22.21264 | 0.102099 | 32    |
| 603399 | 2017 | 0.359 | 0    | 0.069101 | 0.00477489 | 22.21264 | 0.102099 | 32    |
| 603399 | 2017 | -0.97 | 0    | 0.069101 | 0.00477489 | 21.94708 | 0.102099 | 32    |
| 600305 | 2017 | -0.01 | 0.02 | 1.290456 | 1.6652771  | 21.66675 | 0.149156 | 44.63 |
| 2077   | 2017 | 0.214 | 0.02 | 1.290456 | 1.6652771  | 22.71285 | 0.007001 | 48.97 |
| 910    | 2017 | 0.244 | 0.02 | 1.290456 | 1.6652771  | 22.57043 | 0.200951 | 45.42 |
| 2104   | 2017 | -0.06 | 0.02 | 1.290456 | 1.6652771  | 21.4588  | 0.08726  | 20.21 |
| 2223   | 2017 | -0.23 | 0.02 | 1.290456 | 1.6652771  | 22.61466 | 0.112647 | 26.53 |
| 600844 | 2017 | 0.533 | 0.02 | 1.290456 | 1.6652771  | 22.06001 | 0.127778 | 17.45 |
| 910    | 2017 | 0.078 | 0.02 | 1.290456 | 1.6652771  | 22.57043 | 0.200951 | 45.42 |
| 910    | 2017 | 0.078 | 0.02 | 1.290456 | 1.6652771  | 22.57043 | 0.200951 | 45.42 |
| 2223   | 2017 | -0.17 | 0.02 | 1.290456 | 1.6652771  | 22.61466 | 0.112647 | 26.53 |
| 2223   | 2017 | -0.23 | 0.02 | 1.290456 | 1.6652771  | 22.61466 | 0.112647 | 26.53 |
| 300217 | 2017 | 0.691 | 0.02 | 1.290456 | 1.6652771  | 21.81263 | 0.049822 | 14.68 |
| 2223   | 2017 | -0.65 | 0.02 | 1.290456 | 1.6652771  | 22.61466 | 0.112647 | 26.53 |
| 2223   | 2017 | -0.23 | 0.02 | 1.290456 | 1.6652771  | 22.61466 | 0.112647 | 26.53 |
| 910    | 2017 | -0.31 | 0.02 | 1.290456 | 1.6652771  | 22.57043 | 0.200951 | 45.42 |
| 2104   | 2017 | 0.949 | 0.02 | 1.290456 | 1.6652771  | 21.5056  | 0.08726  | 20.21 |
| 2223   | 2017 | -0.24 | 0.02 | 1.290456 | 1.6652771  | 22.61466 | 0.112647 | 26.53 |
| 603007 | 2017 | 0.182 | 0.02 | 1.290456 | 1.6652771  | 21.53418 | 0.177884 | 41.7  |
| 600844 | 2017 | 0.533 | 0.02 | 1.290456 | 1.6652771  | 22.06001 | 0.127778 | 17.45 |
| 600844 | 2017 | 0.533 | 0.02 | 1.290456 | 1.6652771  | 21.82864 | 0.127778 | 17.45 |
| 2077   | 2017 | -0.76 | 0.02 | 1.290456 | 1.6652771  | 22.49447 | 0.007001 | 48.97 |
| 300217 | 2017 | -0.63 | 0.02 | 1.290456 | 1.6652771  | 21.58036 | 0.049822 | 14.68 |

|        |      |       |      |          |           |          |          |       |
|--------|------|-------|------|----------|-----------|----------|----------|-------|
| 600844 | 2017 | 0.533 | 0.02 | 1.290456 | 1.6652771 | 22.06001 | 0.127778 | 17.45 |
| 2077   | 2017 | -0.76 | 0.02 | 1.290456 | 1.6652771 | 22.71285 | 0.007001 | 48.97 |
| 600305 | 2017 | -0.07 | 0.02 | 1.290456 | 1.6652771 | 21.66675 | 0.149156 | 44.63 |
| 2077   | 2017 | 0.563 | 0.02 | 1.290456 | 1.6652771 | 22.71285 | 0.007001 | 48.97 |
| 600844 | 2017 | 0.533 | 0.02 | 1.290456 | 1.6652771 | 22.06001 | 0.127778 | 17.45 |
| 600305 | 2017 | -0.07 | 0.02 | 1.290456 | 1.6652771 | 21.66675 | 0.149156 | 44.63 |
| 910    | 2017 | 0.078 | 0.02 | 1.290456 | 1.6652771 | 22.57043 | 0.200951 | 45.42 |
| 600746 | 2017 | 0.369 | 0.02 | 1.290456 | 1.6652771 | 20.29159 | 0.149059 | 54.81 |
| 2223   | 2017 | -0.23 | 0.02 | 1.290456 | 1.6652771 | 22.54979 | 0.112647 | 26.53 |
| 2223   | 2017 | -0.23 | 0.02 | 1.290456 | 1.6652771 | 22.61466 | 0.112647 | 26.53 |
| 2223   | 2017 | -0.17 | 0.02 | 1.290456 | 1.6652771 | 22.61466 | 0.112647 | 26.53 |
| 603007 | 2017 | 0.009 | 0.02 | 1.290456 | 1.6652771 | 21.68283 | 0.177884 | 41.7  |
| 2104   | 2017 | 0.949 | 0.02 | 1.290456 | 1.6652771 | 21.5056  | 0.08726  | 20.21 |
| 2104   | 2017 | 0.202 | 0.02 | 1.290456 | 1.6652771 | 21.5056  | 0.08726  | 20.21 |
| 2223   | 2017 | -0.23 | 0.02 | 1.290456 | 1.6652771 | 22.61466 | 0.112647 | 26.53 |
| 2223   | 2017 | -0.27 | 0.02 | 1.290456 | 1.6652771 | 22.61466 | 0.112647 | 26.53 |
| 2077   | 2017 | 0.214 | 0.02 | 1.290456 | 1.6652771 | 22.71285 | 0.007001 | 48.97 |
| 2223   | 2017 | -0.23 | 0.02 | 1.290456 | 1.6652771 | 22.61466 | 0.112647 | 26.53 |
| 603007 | 2017 | -0.55 | 0.02 | 1.290456 | 1.6652771 | 21.68283 | 0.177884 | 41.7  |
| 603007 | 2017 | -0.24 | 0.02 | 1.290456 | 1.6652771 | 21.68283 | 0.177884 | 41.7  |
| 603007 | 2017 | -0.15 | 0.02 | 1.290456 | 1.6652771 | 21.68283 | 0.177884 | 41.7  |
| 603007 | 2017 | -0.55 | 0.02 | 1.290456 | 1.6652771 | 21.68283 | 0.177884 | 41.7  |
| 300217 | 2017 | -0.63 | 0.02 | 1.290456 | 1.6652771 | 21.81263 | 0.049822 | 14.68 |
| 910    | 2017 | 0.078 | 0.02 | 1.290456 | 1.6652771 | 22.57043 | 0.200951 | 45.42 |
| 910    | 2017 | 0.133 | 0.02 | 1.290456 | 1.6652771 | 22.57043 | 0.200951 | 45.42 |
| 600305 | 2017 | 0.254 | 0.02 | 1.290456 | 1.6652771 | 21.66675 | 0.149156 | 44.63 |
| 300217 | 2017 | -0.63 | 0.02 | 1.290456 | 1.6652771 | 21.81263 | 0.049822 | 14.68 |
| 2223   | 2017 | -0.23 | 0.02 | 1.290456 | 1.6652771 | 22.61466 | 0.112647 | 26.53 |
| 300217 | 2017 | -0.63 | 0.02 | 1.290456 | 1.6652771 | 21.81263 | 0.049822 | 14.68 |
| 910    | 2017 | 0.078 | 0.02 | 1.290456 | 1.6652771 | 22.57043 | 0.200951 | 45.42 |
| 2223   | 2017 | -0.23 | 0.02 | 1.290456 | 1.6652771 | 22.61466 | 0.112647 | 26.53 |
| 910    | 2017 | 0.078 | 0.02 | 1.290456 | 1.6652771 | 22.57043 | 0.200951 | 45.42 |
| 2223   | 2017 | -0.25 | 0.02 | 1.290456 | 1.6652771 | 22.61466 | 0.112647 | 26.53 |
| 910    | 2017 | 0.078 | 0.02 | 1.290456 | 1.6652771 | 22.57043 | 0.200951 | 45.42 |
| 600305 | 2017 | 0.519 | 0.02 | 1.290456 | 1.6652771 | 21.66675 | 0.149156 | 44.63 |
| 910    | 2017 | 0.078 | 0.02 | 1.290456 | 1.6652771 | 22.57043 | 0.200951 | 45.42 |
| 2077   | 2017 | -0.76 | 0.02 | 1.290456 | 1.6652771 | 22.71285 | 0.007001 | 48.97 |
| 600305 | 2017 | 0.519 | 0.02 | 1.290456 | 1.6652771 | 21.66675 | 0.149156 | 44.63 |
| 600746 | 2017 | 0.369 | 0.02 | 1.290456 | 1.6652771 | 20.29159 | 0.149059 | 54.81 |
| 600305 | 2017 | 0.519 | 0.02 | 1.290456 | 1.6652771 | 21.52898 | 0.149156 | 44.63 |
| 2223   | 2017 | -0.52 | 0.02 | 1.290456 | 1.6652771 | 22.61466 | 0.112647 | 26.53 |
| 600305 | 2017 | -0.81 | 0.02 | 1.290456 | 1.6652771 | 21.66675 | 0.149156 | 44.63 |
| 600746 | 2017 | 0.369 | 0.02 | 1.290456 | 1.6652771 | 20.29159 | 0.149059 | 54.81 |
| 910    | 2017 | 0.019 | 0.02 | 1.290456 | 1.6652771 | 22.57043 | 0.200951 | 45.42 |
| 603007 | 2017 | 0.182 | 0.02 | 1.290456 | 1.6652771 | 21.68283 | 0.177884 | 41.7  |
| 910    | 2017 | 0.078 | 0.02 | 1.290456 | 1.6652771 | 22.57043 | 0.200951 | 45.42 |
| 603007 | 2017 | 0.182 | 0.02 | 1.290456 | 1.6652771 | 21.68283 | 0.177884 | 41.7  |
| 600305 | 2017 | 0.519 | 0.02 | 1.290456 | 1.6652771 | 21.66675 | 0.149156 | 44.63 |
| 2104   | 2017 | -0.06 | 0.02 | 1.290456 | 1.6652771 | 21.5056  | 0.08726  | 20.21 |
| 910    | 2017 | 0.244 | 0.02 | 1.290456 | 1.6652771 | 22.57043 | 0.200951 | 45.42 |
| 910    | 2017 | 0.019 | 0.02 | 1.290456 | 1.6652771 | 22.57043 | 0.200951 | 45.42 |
| 910    | 2017 | -0.25 | 0.02 | 1.290456 | 1.6652771 | 22.57043 | 0.200951 | 45.42 |
| 2223   | 2017 | -0.23 | 0.02 | 1.290456 | 1.6652771 | 22.61466 | 0.112647 | 26.53 |
| 600305 | 2017 | 0.519 | 0.02 | 1.290456 | 1.6652771 | 21.66675 | 0.149156 | 44.63 |

|        |      |       |      |          |           |          |          |       |
|--------|------|-------|------|----------|-----------|----------|----------|-------|
| 2077   | 2017 | 0.563 | 0.02 | 1.290456 | 1.6652771 | 22.71285 | 0.007001 | 48.97 |
| 910    | 2017 | -0.75 | 0.02 | 1.290456 | 1.6652771 | 22.57043 | 0.200951 | 45.42 |
| 300217 | 2017 | 0.161 | 0.02 | 1.290456 | 1.6652771 | 21.81263 | 0.049822 | 14.68 |
| 600305 | 2017 | 0.519 | 0.02 | 1.290456 | 1.6652771 | 21.66675 | 0.149156 | 44.63 |
| 300217 | 2017 | 0.691 | 0.02 | 1.290456 | 1.6652771 | 21.81263 | 0.049822 | 14.68 |
| 2077   | 2017 | -0.76 | 0.02 | 1.290456 | 1.6652771 | 22.71285 | 0.007001 | 48.97 |
| 2104   | 2017 | 0.901 | 0.02 | 1.290456 | 1.6652771 | 21.5056  | 0.08726  | 20.21 |
| 910    | 2017 | 0.078 | 0.02 | 1.290456 | 1.6652771 | 22.0955  | 0.200951 | 45.42 |
| 2223   | 2017 | -0.03 | 0.02 | 1.290456 | 1.6652771 | 22.61466 | 0.112647 | 26.53 |
| 2104   | 2017 | 1.262 | 0.02 | 1.290456 | 1.6652771 | 21.4588  | 0.08726  | 20.21 |
| 910    | 2017 | 0.078 | 0.02 | 1.290456 | 1.6652771 | 22.57043 | 0.200951 | 45.42 |
| 910    | 2017 | 0.078 | 0.02 | 1.290456 | 1.6652771 | 22.57043 | 0.200951 | 45.42 |
| 600305 | 2017 | 0.519 | 0.02 | 1.290456 | 1.6652771 | 21.66675 | 0.149156 | 44.63 |
| 300510 | 2017 | -0.25 | 0.07 | 1.618806 | 2.6205312 | 21.82661 | 0.055159 | 35.08 |
| 600148 | 2017 | -0.27 | 0.07 | 1.618806 | 2.6205312 | 20.75373 | 0.074946 | 32.07 |
| 30     | 2017 | -0.48 | 0.07 | 1.618806 | 2.6205312 | 23.06164 | 0.143543 | 24.41 |
| 30     | 2017 | -0.67 | 0.07 | 1.618806 | 2.6205312 | 23.06164 | 0.143543 | 24.41 |
| 2338   | 2017 | 1.305 | 0.07 | 1.618806 | 2.6205312 | 20.68269 | 0.060104 | 42.65 |
| 30     | 2017 | -0.67 | 0.07 | 1.618806 | 2.6205312 | 23.06164 | 0.143543 | 24.41 |
| 600881 | 2017 | -0.89 | 0.07 | 1.618806 | 2.6205312 | 24.41022 | 0.100931 | 9.08  |
| 600881 | 2017 | -0.94 | 0.07 | 1.618806 | 2.6205312 | 24.41022 | 0.100931 | 9.08  |
| 600148 | 2017 | -0.27 | 0.07 | 1.618806 | 2.6205312 | 20.75373 | 0.074946 | 32.07 |
| 600742 | 2017 | -0.92 | 0.07 | 1.618806 | 2.6205312 | 22.42912 | 0.112366 | 20.14 |
| 300510 | 2017 | -0.25 | 0.07 | 1.618806 | 2.6205312 | 21.82661 | 0.055159 | 35.08 |
| 600110 | 2017 | -0.73 | 0.07 | 1.618806 | 2.6205312 | 22.55057 | 0.091363 | 9.05  |
| 600881 | 2017 | 0.382 | 0.07 | 1.618806 | 2.6205312 | 24.41022 | 0.100931 | 9.08  |
| 661    | 2017 | 0.948 | 0.07 | 1.618806 | 2.6205312 | 22.71816 | 0.178375 | 22.36 |
| 661    | 2017 | 0.948 | 0.07 | 1.618806 | 2.6205312 | 22.71816 | 0.178375 | 22.36 |
| 2338   | 2017 | 0.79  | 0.07 | 1.618806 | 2.6205312 | 20.68269 | 0.060104 | 42.65 |
| 600110 | 2017 | -0.73 | 0.07 | 1.618806 | 2.6205312 | 22.55057 | 0.091363 | 9.05  |
| 300396 | 2017 | 1.238 | 0.07 | 1.618806 | 2.6205312 | 21.339   | 0.149277 | 53.8  |
| 600881 | 2017 | -0.94 | 0.07 | 1.618806 | 2.6205312 | 24.41022 | 0.100931 | 9.08  |
| 600881 | 2017 | -0.94 | 0.07 | 1.618806 | 2.6205312 | 24.41022 | 0.100931 | 9.08  |
| 661    | 2017 | 0.948 | 0.07 | 1.618806 | 2.6205312 | 22.71816 | 0.178375 | 22.36 |
| 600881 | 2017 | -0.94 | 0.07 | 1.618806 | 2.6205312 | 24.41022 | 0.100931 | 9.08  |
| 600110 | 2017 | -0.73 | 0.07 | 1.618806 | 2.6205312 | 22.55057 | 0.091363 | 9.05  |
| 875    | 2017 | -0.31 | 0.07 | 1.618806 | 2.6205312 | 24.28377 | -0.03478 | 19.61 |
| 600742 | 2017 | -0.92 | 0.07 | 1.618806 | 2.6205312 | 22.90248 | 0.112366 | 20.14 |
| 300510 | 2017 | -0.02 | 0.07 | 1.618806 | 2.6205312 | 21.66207 | 0.055159 | 35.08 |
| 2338   | 2017 | 0.737 | 0.07 | 1.618806 | 2.6205312 | 20.68269 | 0.060104 | 42.65 |
| 546    | 2017 | 0.613 | 0.07 | 1.618806 | 2.6205312 | 22.80153 | 0.103953 | 37.46 |
| 875    | 2017 | -0.31 | 0.07 | 1.618806 | 2.6205312 | 24.28377 | -0.03478 | 19.61 |
| 600742 | 2017 | -0.47 | 0.07 | 1.618806 | 2.6205312 | 22.90248 | 0.112366 | 20.14 |
| 30     | 2017 | -0.67 | 0.07 | 1.618806 | 2.6205312 | 23.06164 | 0.143543 | 24.41 |
| 661    | 2017 | 0.948 | 0.07 | 1.618806 | 2.6205312 | 22.71816 | 0.178375 | 22.36 |
| 600110 | 2017 | -0.73 | 0.07 | 1.618806 | 2.6205312 | 22.55057 | 0.091363 | 9.05  |
| 300510 | 2017 | 0.148 | 0.07 | 1.618806 | 2.6205312 | 21.82661 | 0.055159 | 35.08 |
| 30     | 2017 | -0.54 | 0.07 | 1.618806 | 2.6205312 | 23.06164 | 0.143543 | 24.41 |
| 300396 | 2017 | 1.181 | 0.07 | 1.618806 | 2.6205312 | 21.339   | 0.149277 | 53.8  |
| 30     | 2017 | -0.67 | 0.07 | 1.618806 | 2.6205312 | 23.06164 | 0.129481 | 24.41 |
| 600742 | 2017 | -0.43 | 0.07 | 1.618806 | 2.6205312 | 22.90248 | 0.112366 | 20.14 |
| 30     | 2017 | -0.56 | 0.07 | 1.618806 | 2.6205312 | 23.06164 | 0.143543 | 24.41 |
| 600881 | 2017 | -0.89 | 0.07 | 1.618806 | 2.6205312 | 24.41022 | 0.100931 | 9.08  |
| 2338   | 2017 | 1.305 | 0.07 | 1.618806 | 2.6205312 | 20.68269 | 0.060104 | 42.65 |

|        |      |       |      |          |           |          |          |       |
|--------|------|-------|------|----------|-----------|----------|----------|-------|
| 300510 | 2017 | 0.148 | 0.07 | 1.618806 | 2.6205312 | 21.82661 | 0.055159 | 35.08 |
| 875    | 2017 | -0.31 | 0.07 | 1.618806 | 2.6205312 | 23.75057 | -0.03478 | 19.61 |
| 546    | 2017 | -0.12 | 0.07 | 1.618806 | 2.6205312 | 22.80153 | 0.103953 | 37.46 |
| 30     | 2017 | -0.51 | 0.07 | 1.618806 | 2.6205312 | 23.06164 | 0.143543 | 24.41 |
| 661    | 2017 | 0.948 | 0.07 | 1.618806 | 2.6205312 | 21.93537 | 0.178375 | 22.36 |
| 875    | 2017 | -0.31 | 0.07 | 1.618806 | 2.6205312 | 24.28377 | -0.03478 | 19.61 |
| 600110 | 2017 | -0.58 | 0.07 | 1.618806 | 2.6205312 | 22.55057 | 0.091363 | 9.05  |
| 30     | 2017 | -0.58 | 0.07 | 1.618806 | 2.6205312 | 23.06164 | 0.143543 | 24.41 |
| 300396 | 2017 | 1.259 | 0.07 | 1.618806 | 2.6205312 | 21.339   | 0.149277 | 53.8  |
| 600110 | 2017 | -0.58 | 0.07 | 1.618806 | 2.6205312 | 22.55057 | 0.091363 | 9.05  |
| 600110 | 2017 | -0.58 | 0.07 | 1.618806 | 2.6205312 | 22.55057 | 0.091363 | 9.05  |
| 661    | 2017 | 0.948 | 0.07 | 1.618806 | 2.6205312 | 22.71816 | 0.178375 | 22.36 |
| 661    | 2017 | 0.948 | 0.07 | 1.618806 | 2.6205312 | 22.71816 | 0.178375 | 22.36 |
| 600189 | 2017 | -0.89 | 0.07 | 1.618806 | 2.6205312 | 22.53544 | 0.019786 | 37.36 |
| 30     | 2017 | -0.67 | 0.07 | 1.618806 | 2.6205312 | 23.06164 | 0.143543 | 24.41 |
| 30     | 2017 | -0.67 | 0.07 | 1.618806 | 2.6205312 | 23.06164 | 0.143543 | 24.41 |
| 2338   | 2017 | -0.02 | 0.07 | 1.618806 | 2.6205312 | 20.68269 | 0.060104 | 42.65 |
| 600148 | 2017 | -0.27 | 0.07 | 1.618806 | 2.6205312 | 20.75373 | 0.074946 | 32.07 |
| 300510 | 2017 | -0.07 | 0.07 | 1.618806 | 2.6205312 | 21.82661 | 0.055159 | 35.08 |
| 300396 | 2017 | 1.385 | 0.07 | 1.618806 | 2.6205312 | 21.339   | 0.149277 | 53.8  |
| 30     | 2017 | -0.67 | 0.07 | 1.618806 | 2.6205312 | 23.06164 | 0.143543 | 24.41 |
| 600881 | 2017 | -0.94 | 0.07 | 1.618806 | 2.6205312 | 24.41022 | 0.100931 | 9.08  |
| 600110 | 2017 | -0.73 | 0.07 | 1.618806 | 2.6205312 | 22.13331 | 0.091363 | 9.05  |
| 600189 | 2017 | -0.89 | 0.07 | 1.618806 | 2.6205312 | 22.53544 | 0.019786 | 37.36 |
| 546    | 2017 | 0.613 | 0.07 | 1.618806 | 2.6205312 | 22.80153 | 0.103953 | 37.46 |
| 600742 | 2017 | -0.92 | 0.07 | 1.618806 | 2.6205312 | 22.90248 | 0.112366 | 20.14 |
| 600110 | 2017 | -0.73 | 0.07 | 1.618806 | 2.6205312 | 22.55057 | 0.091363 | 9.05  |
| 2338   | 2017 | 1.305 | 0.07 | 1.618806 | 2.6205312 | 20.53175 | 0.060104 | 42.65 |
| 600742 | 2017 | -0.43 | 0.07 | 1.618806 | 2.6205312 | 22.90248 | 0.112366 | 20.14 |
| 546    | 2017 | 0.083 | 0.07 | 1.618806 | 2.6205312 | 22.80153 | 0.103953 | 37.46 |
| 600881 | 2017 | -0.94 | 0.07 | 1.618806 | 2.6205312 | 24.7872  | 0.100931 | 9.08  |
| 600742 | 2017 | -0.92 | 0.07 | 1.618806 | 2.6205312 | 22.90248 | 0.112366 | 20.14 |
| 300510 | 2017 | -0.11 | 0.07 | 1.618806 | 2.6205312 | 21.82661 | 0.055159 | 35.08 |
| 546    | 2017 | -0.05 | 0.07 | 1.618806 | 2.6205312 | 22.02643 | 0.103953 | 37.46 |
| 600742 | 2017 | -0.92 | 0.07 | 1.618806 | 2.6205312 | 22.90248 | 0.112366 | 20.14 |
| 600881 | 2017 | -0.94 | 0.07 | 1.618806 | 2.6205312 | 24.41022 | 0.100931 | 9.08  |
| 600742 | 2017 | -0.92 | 0.07 | 1.618806 | 2.6205312 | 22.90248 | 0.112366 | 20.14 |
| 30     | 2017 | -0.67 | 0.07 | 1.618806 | 2.6205312 | 23.06164 | 0.143543 | 24.41 |
| 600742 | 2017 | -0.92 | 0.07 | 1.618806 | 2.6205312 | 22.90248 | 0.112366 | 20.14 |
| 2338   | 2017 | 0.674 | 0.07 | 1.618806 | 2.6205312 | 20.68269 | 0.060104 | 42.65 |
| 600110 | 2017 | -0.73 | 0.07 | 1.618806 | 2.6205312 | 22.55057 | 0.091363 | 9.05  |
| 600189 | 2017 | -0.89 | 0.07 | 1.618806 | 2.6205312 | 22.3701  | 0.019786 | 37.36 |
| 2338   | 2017 | 0.927 | 0.07 | 1.618806 | 2.6205312 | 20.68269 | 0.060104 | 42.65 |
| 600881 | 2017 | -0.94 | 0.07 | 1.618806 | 2.6205312 | 24.41022 | 0.100931 | 9.08  |
| 661    | 2017 | 0.948 | 0.07 | 1.618806 | 2.6205312 | 22.71816 | 0.178375 | 22.36 |
| 546    | 2017 | -0.36 | 0.07 | 1.618806 | 2.6205312 | 22.80153 | 0.103953 | 37.46 |
| 300396 | 2017 | 1.385 | 0.07 | 1.618806 | 2.6205312 | 21.1211  | 0.149277 | 53.8  |
| 30     | 2017 | -0.67 | 0.07 | 1.618806 | 2.6205312 | 23.06164 | 0.143543 | 24.41 |
| 546    | 2017 | 0.613 | 0.07 | 1.618806 | 2.6205312 | 22.80153 | 0.103953 | 37.46 |
| 600110 | 2017 | -0.55 | 0.07 | 1.618806 | 2.6205312 | 22.55057 | 0.091363 | 9.05  |
| 30     | 2017 | -0.54 | 0.07 | 1.618806 | 2.6205312 | 23.06164 | 0.143543 | 24.41 |
| 30     | 2017 | 0.653 | 0.07 | 1.618806 | 2.6205312 | 23.06164 | 0.143543 | 24.41 |
| 2338   | 2017 | -0.02 | 0.07 | 1.618806 | 2.6205312 | 20.68269 | 0.060104 | 42.65 |
| 600881 | 2017 | 0.382 | 0.07 | 1.618806 | 2.6205312 | 24.41022 | 0.100931 | 9.08  |

|        |      |       |      |          |           |          |          |       |
|--------|------|-------|------|----------|-----------|----------|----------|-------|
| 600881 | 2017 | -0.94 | 0.07 | 1.618806 | 2.6205312 | 24.41022 | 0.100931 | 9.08  |
| 300396 | 2017 | 1.385 | 0.07 | 1.618806 | 2.6205312 | 21.339   | 0.149277 | 53.8  |
| 30     | 2017 | -0.61 | 0.07 | 1.618806 | 2.6205312 | 22.7752  | 0.143543 | 24.41 |
| 600148 | 2017 | -0.27 | 0.07 | 1.618806 | 2.6205312 | 20.75373 | 0.074946 | 32.07 |
| 600189 | 2017 | -0.89 | 0.07 | 1.618806 | 2.6205312 | 22.53544 | 0.019786 | 37.36 |
| 2338   | 2017 | 1.305 | 0.07 | 1.618806 | 2.6205312 | 20.68269 | 0.060104 | 42.65 |
| 600148 | 2017 | -0.27 | 0.07 | 1.618806 | 2.6205312 | 20.24785 | 0.074946 | 32.07 |
| 600742 | 2017 | -0.92 | 0.07 | 1.618806 | 2.6205312 | 22.90248 | 0.112366 | 20.14 |
| 600881 | 2017 | -0.94 | 0.07 | 1.618806 | 2.6205312 | 24.41022 | 0.100931 | 9.08  |
| 30     | 2017 | -0.67 | 0.07 | 1.618806 | 2.6205312 | 23.06164 | 0.143543 | 24.41 |
| 875    | 2017 | -0.31 | 0.07 | 1.618806 | 2.6205312 | 24.28377 | -0.03478 | 19.61 |
| 600881 | 2017 | -0.94 | 0.07 | 1.618806 | 2.6205312 | 24.41022 | 0.100931 | 9.08  |
| 661    | 2017 | 0.948 | 0.07 | 1.618806 | 2.6205312 | 22.71816 | 0.178375 | 22.36 |
| 2338   | 2017 | 1.305 | 0.07 | 1.618806 | 2.6205312 | 20.68269 | 0.060104 | 42.65 |
| 600881 | 2017 | -0.94 | 0.07 | 1.618806 | 2.6205312 | 24.41022 | 0.100931 | 9.08  |
| 600478 | 2017 | 1.232 | 0.04 | 1.002727 | 1.0054609 | 22.63109 | 0.011915 | 17.76 |
| 917    | 2017 | 0.392 | 0.04 | 1.002727 | 1.0054609 | 23.89076 | -0.02105 | 16.66 |
| 601098 | 2017 | 0.385 | 0.04 | 1.002727 | 1.0054609 | 23.70255 | 0.115788 | 61.46 |
| 300267 | 2017 | 0.616 | 0.04 | 1.002727 | 1.0054609 | 22.46725 | 0.095127 | 41.44 |
| 300433 | 2017 | -0.42 | 0.04 | 1.002727 | 1.0054609 | 24.29904 | 0.120446 | 74.18 |
| 932    | 2017 | 0.173 | 0.04 | 1.002727 | 1.0054609 | 25.03982 | 0.302158 | 60.32 |
| 600156 | 2017 | -0.83 | 0.04 | 1.002727 | 1.0054609 | 20.10336 | -0.17926 | 40.31 |
| 932    | 2017 | 0.138 | 0.04 | 1.002727 | 1.0054609 | 25.03982 | 0.302158 | 60.32 |
| 300267 | 2017 | 0.616 | 0.04 | 1.002727 | 1.0054609 | 22.46725 | 0.095127 | 41.44 |
| 504    | 2017 | 0.739 | 0.04 | 1.002727 | 1.0054609 | 20.10336 | -0.28224 | 25.58 |
| 157    | 2017 | 0.843 | 0.04 | 1.002727 | 1.0054609 | 25.1439  | 0.032646 | 17.78 |
| 2533   | 2017 | 0.058 | 0.04 | 1.002727 | 1.0054609 | 21.97812 | 0.053143 | 20.83 |
| 300515 | 2017 | 0.531 | 0.04 | 1.002727 | 1.0054609 | 20.11934 | 0.052734 | 34.5  |
| 998    | 2017 | 1.083 | 0.04 | 1.002727 | 1.0054609 | 23.28642 | 0.138682 | 9.49  |
| 917    | 2017 | 0.392 | 0.04 | 1.002727 | 1.0054609 | 23.46745 | -0.02105 | 16.66 |
| 989    | 2017 | -0.42 | 0.04 | 1.002727 | 1.0054609 | 22.49424 | 0.159873 | 42.33 |
| 300015 | 2017 | 0.366 | 0.04 | 1.002727 | 1.0054609 | 22.95466 | 0.144875 | 40.78 |
| 300338 | 2017 | 0.854 | 0.04 | 1.002727 | 1.0054609 | 21.82707 | 0.078209 | 15.9  |
| 917    | 2017 | 0.392 | 0.04 | 1.002727 | 1.0054609 | 23.89076 | -0.02105 | 16.66 |
| 504    | 2017 | -0.14 | 0.04 | 1.002727 | 1.0054609 | 20.10336 | -0.28224 | 25.58 |
| 300345 | 2017 | 1.181 | 0.04 | 1.002727 | 1.0054609 | 20.74084 | -0.0715  | 20.55 |
| 2761   | 2017 | -0.77 | 0.04 | 1.002727 | 1.0054609 | 20.68975 | 0.034567 | 28.51 |
| 601098 | 2017 | 0.385 | 0.04 | 1.002727 | 1.0054609 | 23.70255 | 0.115788 | 61.46 |
| 2397   | 2017 | -0.34 | 0.04 | 1.002727 | 1.0054609 | 21.91734 | 0.038476 | 18.21 |
| 2533   | 2017 | -0.54 | 0.04 | 1.002727 | 1.0054609 | 21.97812 | 0.053143 | 20.83 |
| 600731 | 2017 | 0.671 | 0.04 | 1.002727 | 1.0054609 | 21.35608 | 0.071398 | 22.91 |
| 157    | 2017 | 0.512 | 0.04 | 1.002727 | 1.0054609 | 25.1439  | 0.032646 | 17.78 |
| 2097   | 2017 | -0.37 | 0.04 | 1.002727 | 1.0054609 | 23.23187 | 0.043717 | 24.79 |
| 2261   | 2017 | 1.455 | 0.04 | 1.002727 | 1.0054609 | 22.19763 | 0.017125 | 17.33 |
| 600744 | 2017 | -0.27 | 0.04 | 1.002727 | 1.0054609 | 23.66005 | -0.41535 | 34.18 |
| 300345 | 2017 | 1.422 | 0.04 | 1.002727 | 1.0054609 | 20.74084 | -0.0715  | 20.55 |
| 603998 | 2017 | 0.781 | 0.04 | 1.002727 | 1.0054609 | 20.96598 | 0.062284 | 36.41 |
| 300433 | 2017 | -0.24 | 0.04 | 1.002727 | 1.0054609 | 24.29904 | 0.120446 | 74.18 |
| 157    | 2017 | -0.1  | 0.04 | 1.002727 | 1.0054609 | 25.1439  | 0.032646 | 17.78 |
| 300338 | 2017 | 0.854 | 0.04 | 1.002727 | 1.0054609 | 21.82707 | 0.078209 | 15.9  |
| 300490 | 2017 | 0.685 | 0.04 | 1.002727 | 1.0054609 | 21.55545 | 0.045013 | 43.67 |
| 300267 | 2017 | 0.616 | 0.04 | 1.002727 | 1.0054609 | 22.21213 | 0.095127 | 41.44 |
| 989    | 2017 | -0.76 | 0.04 | 1.002727 | 1.0054609 | 22.49424 | 0.159873 | 42.33 |
| 300490 | 2017 | 0.685 | 0.04 | 1.002727 | 1.0054609 | 21.55545 | 0.045013 | 43.67 |

|        |      |       |      |          |           |          |          |       |
|--------|------|-------|------|----------|-----------|----------|----------|-------|
| 157    | 2017 | 0.101 | 0.04 | 1.002727 | 1.0054609 | 25.1439  | 0.032646 | 17.78 |
| 2297   | 2017 | 0.078 | 0.04 | 1.002727 | 1.0054609 | 21.53619 | -0.04165 | 15.38 |
| 2261   | 2017 | 1.455 | 0.04 | 1.002727 | 1.0054609 | 22.19763 | 0.017125 | 17.33 |
| 2397   | 2017 | -0.49 | 0.04 | 1.002727 | 1.0054609 | 21.91734 | 0.038476 | 18.21 |
| 600744 | 2017 | -0.4  | 0.04 | 1.002727 | 1.0054609 | 23.66005 | -0.41535 | 34.18 |
| 157    | 2017 | 0.402 | 0.04 | 1.002727 | 1.0054609 | 25.1439  | 0.032646 | 17.78 |
| 600156 | 2017 | -0.76 | 0.04 | 1.002727 | 1.0054609 | 20.76123 | -0.17926 | 40.31 |
| 601098 | 2017 | 0.385 | 0.04 | 1.002727 | 1.0054609 | 23.70255 | 0.115788 | 61.46 |
| 600476 | 2017 | 0.72  | 0.04 | 1.002727 | 1.0054609 | 20.10336 | 0.010582 | 32.98 |
| 2452   | 2017 | 0.003 | 0.04 | 1.002727 | 1.0054609 | 21.78383 | 0.044869 | 18.33 |
| 300490 | 2017 | 0.628 | 0.04 | 1.002727 | 1.0054609 | 21.55545 | 0.045013 | 43.67 |
| 2297   | 2017 | 0.342 | 0.04 | 1.002727 | 1.0054609 | 21.53619 | -0.04165 | 15.38 |
| 300015 | 2017 | -0.32 | 0.04 | 1.002727 | 1.0054609 | 22.95466 | 0.144875 | 40.78 |
| 998    | 2017 | 1.083 | 0.04 | 1.002727 | 1.0054609 | 23.28642 | 0.138682 | 9.49  |
| 600744 | 2017 | -0.48 | 0.04 | 1.002727 | 1.0054609 | 23.66005 | -0.41535 | 34.18 |
| 2533   | 2017 | -0.02 | 0.04 | 1.002727 | 1.0054609 | 21.97812 | 0.053143 | 20.83 |
| 2097   | 2017 | -0.24 | 0.04 | 1.002727 | 1.0054609 | 23.23187 | 0.043717 | 24.79 |
| 300338 | 2017 | 0.08  | 0.04 | 1.002727 | 1.0054609 | 21.82707 | 0.078209 | 15.9  |
| 300267 | 2017 | 0.616 | 0.04 | 1.002727 | 1.0054609 | 22.46725 | 0.095127 | 41.44 |
| 932    | 2017 | -0.11 | 0.04 | 1.002727 | 1.0054609 | 25.03982 | 0.302158 | 60.32 |
| 300490 | 2017 | 0.906 | 0.04 | 1.002727 | 1.0054609 | 21.55545 | 0.045013 | 43.67 |
| 2297   | 2017 | 0.872 | 0.04 | 1.002727 | 1.0054609 | 21.25946 | -0.04165 | 15.38 |
| 300490 | 2017 | 0.574 | 0.04 | 1.002727 | 1.0054609 | 21.55545 | 0.045013 | 43.67 |
| 300338 | 2017 | 0.854 | 0.04 | 1.002727 | 1.0054609 | 21.61531 | 0.078209 | 15.9  |
| 300015 | 2017 | -0.96 | 0.04 | 1.002727 | 1.0054609 | 22.95466 | 0.144875 | 40.78 |
| 300345 | 2017 | 1.091 | 0.04 | 1.002727 | 1.0054609 | 20.74084 | -0.0715  | 20.55 |
| 300267 | 2017 | 0.616 | 0.04 | 1.002727 | 1.0054609 | 22.46725 | 0.095127 | 41.44 |
| 300358 | 2017 | -0.15 | 0.04 | 1.002727 | 1.0054609 | 22.09837 | 0.069174 | 46.16 |
| 157    | 2017 | 0.084 | 0.04 | 1.002727 | 1.0054609 | 25.1439  | 0.032646 | 17.78 |
| 932    | 2017 | 0.275 | 0.04 | 1.002727 | 1.0054609 | 22.85313 | 0.302158 | 60.32 |
| 300187 | 2017 | -0.05 | 0.04 | 1.002727 | 1.0054609 | 21.88402 | 0.086111 | 62.56 |
| 2097   | 2017 | -0.18 | 0.04 | 1.002727 | 1.0054609 | 23.23187 | 0.043717 | 24.79 |
| 600478 | 2017 | 0.54  | 0.04 | 1.002727 | 1.0054609 | 22.63109 | 0.011915 | 17.76 |
| 300187 | 2017 | -0.05 | 0.04 | 1.002727 | 1.0054609 | 21.88402 | 0.086111 | 62.56 |
| 600478 | 2017 | 0.658 | 0.04 | 1.002727 | 1.0054609 | 22.63109 | 0.011915 | 17.76 |
| 600744 | 2017 | -0.93 | 0.04 | 1.002727 | 1.0054609 | 23.45437 | -0.41535 | 34.18 |
| 600156 | 2017 | -0.76 | 0.04 | 1.002727 | 1.0054609 | 20.76123 | -0.17926 | 40.31 |
| 2097   | 2017 | -0.17 | 0.04 | 1.002727 | 1.0054609 | 23.23187 | 0.043717 | 24.79 |
| 300298 | 2017 | 0.156 | 0.04 | 1.002727 | 1.0054609 | 21.23175 | 0.185627 | 30.97 |
| 900    | 2017 | -0.66 | 0.04 | 1.002727 | 1.0054609 | 23.85867 | 0.095573 | 27.19 |
| 2761   | 2017 | -0.77 | 0.04 | 1.002727 | 1.0054609 | 20.65722 | 0.034567 | 28.51 |
| 300298 | 2017 | 0.156 | 0.04 | 1.002727 | 1.0054609 | 21.23175 | 0.185627 | 30.97 |
| 932    | 2017 | 0.173 | 0.04 | 1.002727 | 1.0054609 | 25.03982 | 0.302158 | 60.32 |
| 300358 | 2017 | 0.004 | 0.04 | 1.002727 | 1.0054609 | 22.09837 | 0.069174 | 46.16 |
| 300267 | 2017 | 0.616 | 0.04 | 1.002727 | 1.0054609 | 22.46725 | 0.095127 | 41.44 |
| 2452   | 2017 | -0.07 | 0.04 | 1.002727 | 1.0054609 | 21.78383 | 0.044869 | 18.33 |
| 900    | 2017 | -0.66 | 0.04 | 1.002727 | 1.0054609 | 23.72024 | 0.095573 | 27.19 |
| 600744 | 2017 | -0.4  | 0.04 | 1.002727 | 1.0054609 | 23.66005 | -0.41535 | 34.18 |
| 2097   | 2017 | 0.077 | 0.04 | 1.002727 | 1.0054609 | 22.98038 | 0.043717 | 24.79 |
| 2533   | 2017 | -0.54 | 0.04 | 1.002727 | 1.0054609 | 21.97812 | 0.053143 | 20.83 |
| 600744 | 2017 | -0.27 | 0.04 | 1.002727 | 1.0054609 | 23.66005 | -0.41535 | 34.18 |
| 998    | 2017 | 1.083 | 0.04 | 1.002727 | 1.0054609 | 23.28642 | 0.138682 | 9.49  |
| 932    | 2017 | -0.15 | 0.04 | 1.002727 | 1.0054609 | 25.03982 | 0.302158 | 60.32 |
| 2397   | 2017 | -0.46 | 0.04 | 1.002727 | 1.0054609 | 21.91734 | 0.038476 | 18.21 |



|        |      |       |      |          |           |          |          |       |
|--------|------|-------|------|----------|-----------|----------|----------|-------|
| 300298 | 2017 | 0.156 | 0.04 | 1.002727 | 1.0054609 | 21.24917 | 0.185627 | 30.97 |
| 603998 | 2017 | 0.781 | 0.04 | 1.002727 | 1.0054609 | 21.04022 | 0.062284 | 36.41 |
| 2097   | 2017 | -0.17 | 0.04 | 1.002727 | 1.0054609 | 23.23187 | 0.043717 | 24.79 |
| 600975 | 2017 | -0.97 | 0.04 | 1.002727 | 1.0054609 | 21.29864 | 0.029484 | 30.95 |
| 2261   | 2017 | 1.455 | 0.04 | 1.002727 | 1.0054609 | 22.19763 | 0.017125 | 17.33 |
| 2452   | 2017 | -0.16 | 0.04 | 1.002727 | 1.0054609 | 21.78383 | 0.044869 | 18.33 |
| 300433 | 2017 | -0.2  | 0.04 | 1.002727 | 1.0054609 | 24.09135 | 0.120446 | 74.18 |
| 300515 | 2017 | 0.534 | 0.04 | 1.002727 | 1.0054609 | 20.11934 | 0.052734 | 34.5  |
| 2261   | 2017 | 1.455 | 0.04 | 1.002727 | 1.0054609 | 22.04373 | 0.017125 | 17.33 |
| 2452   | 2017 | 0.724 | 0.04 | 1.002727 | 1.0054609 | 21.78383 | 0.044869 | 18.33 |
| 2452   | 2017 | 0.003 | 0.04 | 1.002727 | 1.0054609 | 21.78383 | 0.044869 | 18.33 |
| 300345 | 2017 | 1.091 | 0.04 | 1.002727 | 1.0054609 | 20.65182 | -0.0715  | 20.55 |
| 2452   | 2017 | -0.09 | 0.04 | 1.002727 | 1.0054609 | 21.78383 | 0.044869 | 18.33 |
| 300515 | 2017 | 0.716 | 0.04 | 1.002727 | 1.0054609 | 20.11934 | 0.052734 | 34.5  |
| 2452   | 2017 | 0.003 | 0.04 | 1.002727 | 1.0054609 | 21.78383 | 0.044869 | 18.33 |
| 2452   | 2017 | 0.003 | 0.04 | 1.002727 | 1.0054609 | 21.78383 | 0.044869 | 18.33 |
| 600156 | 2017 | -0.76 | 0.04 | 1.002727 | 1.0054609 | 20.76123 | -0.17926 | 40.31 |
| 917    | 2017 | 0.392 | 0.04 | 1.002727 | 1.0054609 | 23.89076 | -0.02105 | 16.66 |
| 504    | 2017 | 0.739 | 0.04 | 1.002727 | 1.0054609 | 20.10336 | -0.28224 | 25.58 |
| 2452   | 2017 | -0.14 | 0.04 | 1.002727 | 1.0054609 | 21.78383 | 0.044869 | 18.33 |
| 2452   | 2017 | -0.16 | 0.04 | 1.002727 | 1.0054609 | 21.78383 | 0.044869 | 18.33 |
| 2761   | 2017 | -0.77 | 0.04 | 1.002727 | 1.0054609 | 20.65722 | 0.034567 | 28.51 |
| 300015 | 2017 | -0.96 | 0.04 | 1.002727 | 1.0054609 | 22.95466 | 0.144875 | 40.78 |
| 600478 | 2017 | 0.568 | 0.04 | 1.002727 | 1.0054609 | 22.63109 | 0.011915 | 17.76 |
| 300433 | 2017 | -0.42 | 0.04 | 1.002727 | 1.0054609 | 24.29904 | 0.120446 | 74.18 |
| 600478 | 2017 | 0.658 | 0.04 | 1.002727 | 1.0054609 | 22.63109 | 0.011915 | 17.76 |
| 600478 | 2017 | 0.658 | 0.04 | 1.002727 | 1.0054609 | 22.63109 | 0.011915 | 17.76 |
| 300015 | 2017 | -0.87 | 0.04 | 1.002727 | 1.0054609 | 22.95466 | 0.144875 | 40.78 |
| 600975 | 2017 | -0.97 | 0.04 | 1.002727 | 1.0054609 | 21.17822 | 0.029484 | 30.95 |
| 2761   | 2017 | -0.77 | 0.04 | 1.002727 | 1.0054609 | 20.65722 | 0.034567 | 28.51 |
| 300267 | 2017 | 0.616 | 0.04 | 1.002727 | 1.0054609 | 22.46725 | 0.095127 | 41.44 |
| 2297   | 2017 | 0.872 | 0.04 | 1.002727 | 1.0054609 | 21.53619 | -0.04165 | 15.38 |
| 998    | 2017 | 1.083 | 0.04 | 1.002727 | 1.0054609 | 23.18351 | 0.138682 | 9.49  |
| 300358 | 2017 | 0.227 | 0.04 | 1.002727 | 1.0054609 | 22.09837 | 0.069174 | 46.16 |
| 600731 | 2017 | 0.671 | 0.04 | 1.002727 | 1.0054609 | 21.35608 | 0.071398 | 22.91 |
| 300267 | 2017 | 0.616 | 0.04 | 1.002727 | 1.0054609 | 22.46725 | 0.095127 | 41.44 |
| 2261   | 2017 | 1.426 | 0.04 | 1.002727 | 1.0054609 | 22.19763 | 0.017125 | 17.33 |
| 300345 | 2017 | 1.422 | 0.04 | 1.002727 | 1.0054609 | 20.74084 | -0.0715  | 20.55 |
| 300515 | 2017 | 0.716 | 0.04 | 1.002727 | 1.0054609 | 20.11934 | 0.052734 | 34.5  |
| 2533   | 2017 | 0.118 | 0.04 | 1.002727 | 1.0054609 | 21.97812 | 0.053143 | 20.83 |
| 157    | 2017 | 0.843 | 0.04 | 1.002727 | 1.0054609 | 25.1439  | 0.032646 | 17.78 |
| 600731 | 2017 | -0.61 | 0.04 | 1.002727 | 1.0054609 | 21.35608 | 0.071398 | 22.91 |
| 2097   | 2017 | -0.17 | 0.04 | 1.002727 | 1.0054609 | 23.23187 | 0.043717 | 24.79 |
| 917    | 2017 | 0.392 | 0.04 | 1.002727 | 1.0054609 | 23.89076 | -0.02105 | 16.66 |
| 300187 | 2017 | -0.05 | 0.04 | 1.002727 | 1.0054609 | 21.88402 | 0.086111 | 62.56 |
| 600478 | 2017 | 0.883 | 0.04 | 1.002727 | 1.0054609 | 22.63109 | 0.011915 | 17.76 |
| 2650   | 2017 | 0.142 | 0.04 | 1.002727 | 1.0054609 | 21.70065 | 0.07736  | 18.79 |
| 2097   | 2017 | -0.51 | 0.04 | 1.002727 | 1.0054609 | 23.23187 | 0.043717 | 24.79 |
| 2452   | 2017 | -0.09 | 0.04 | 1.002727 | 1.0054609 | 21.78383 | 0.044869 | 18.33 |
| 2261   | 2017 | 1.455 | 0.04 | 1.002727 | 1.0054609 | 22.19763 | 0.017125 | 17.33 |
| 600744 | 2017 | -0.48 | 0.04 | 1.002727 | 1.0054609 | 23.66005 | -0.41535 | 34.18 |
| 998    | 2017 | 1.083 | 0.04 | 1.002727 | 1.0054609 | 23.28642 | 0.138682 | 9.49  |
| 989    | 2017 | -0.42 | 0.04 | 1.002727 | 1.0054609 | 22.49424 | 0.159873 | 42.33 |
| 300187 | 2017 | -0.05 | 0.04 | 1.002727 | 1.0054609 | 21.78019 | 0.086111 | 62.56 |

|        |      |       |      |          |           |          |          |       |
|--------|------|-------|------|----------|-----------|----------|----------|-------|
| 300267 | 2017 | 0.616 | 0.04 | 1.002727 | 1.0054609 | 22.46725 | 0.095127 | 41.44 |
| 932    | 2017 | 0.259 | 0.04 | 1.002727 | 1.0054609 | 25.03982 | 0.302158 | 60.32 |
| 600731 | 2017 | 0.671 | 0.04 | 1.002727 | 1.0054609 | 21.35608 | 0.071398 | 22.91 |
| 998    | 2017 | 1.083 | 0.04 | 1.002727 | 1.0054609 | 23.28642 | 0.138682 | 9.49  |
| 601098 | 2017 | 0.385 | 0.04 | 1.002727 | 1.0054609 | 23.19362 | 0.115788 | 61.46 |
| 600975 | 2017 | -0.97 | 0.04 | 1.002727 | 1.0054609 | 21.29864 | 0.029484 | 30.95 |
| 989    | 2017 | -0.76 | 0.04 | 1.002727 | 1.0054609 | 22.86816 | 0.159873 | 42.33 |
| 300433 | 2017 | -0.16 | 0.04 | 1.002727 | 1.0054609 | 24.29904 | 0.120446 | 74.18 |
| 917    | 2017 | 0.392 | 0.04 | 1.002727 | 1.0054609 | 23.89076 | -0.02105 | 16.66 |
| 2097   | 2017 | -0.17 | 0.04 | 1.002727 | 1.0054609 | 23.23187 | 0.043717 | 24.79 |
| 600478 | 2017 | 0.457 | 0.04 | 1.002727 | 1.0054609 | 22.63109 | 0.011915 | 17.76 |
| 600478 | 2017 | 0.658 | 0.04 | 1.002727 | 1.0054609 | 22.63109 | 0.011915 | 17.76 |
| 300298 | 2017 | 0.156 | 0.04 | 1.002727 | 1.0054609 | 21.23175 | 0.185627 | 30.97 |
| 300358 | 2017 | 0.089 | 0.04 | 1.002727 | 1.0054609 | 22.09837 | 0.069174 | 46.16 |
| 600744 | 2017 | -0.27 | 0.04 | 1.002727 | 1.0054609 | 23.66005 | -0.41535 | 34.18 |
| 300358 | 2017 | 0.099 | 0.04 | 1.002727 | 1.0054609 | 21.98025 | 0.069174 | 46.16 |
| 600731 | 2017 | -0.35 | 0.04 | 1.002727 | 1.0054609 | 21.35608 | 0.071398 | 22.91 |
| 600731 | 2017 | -0.65 | 0.04 | 1.002727 | 1.0054609 | 21.35608 | 0.071398 | 22.91 |
| 603998 | 2017 | 0.781 | 0.04 | 1.002727 | 1.01E+00  | 21.04022 | 0.062284 | 36.41 |
| 157    | 2017 | 0.181 | 0.04 | 1.002727 | 1.01E+00  | 25.1439  | 0.032646 | 17.78 |
| 600478 | 2017 | 0.658 | 0.04 | 1.002727 | 1.01E+00  | 22.63109 | 0.011915 | 17.76 |
| 300433 | 2017 | -0.2  | 0.04 | 1.002727 | 1.01E+00  | 24.29904 | 0.120446 | 74.18 |
| 300433 | 2017 | -0.35 | 0.04 | 1.002727 | 1.01E+00  | 24.29904 | 0.120446 | 74.18 |
| 600744 | 2017 | -0.27 | 0.04 | 1.002727 | 1.01E+00  | 23.66005 | -0.41535 | 34.18 |
| 600731 | 2017 | -0.65 | 0.04 | 1.002727 | 1.0054609 | 21.35608 | 0.071398 | 22.91 |
| 2761   | 2017 | -0.77 | 0.04 | 1.002727 | 1.0054609 | 20.65722 | 0.034567 | 28.51 |
| 2397   | 2017 | -0.57 | 0.04 | 1.002727 | 1.0054609 | 21.91734 | 0.038476 | 18.21 |
| 600731 | 2017 | -0.65 | 0.04 | 1.002727 | 1.0054609 | 20.87656 | 0.071398 | 22.91 |
| 2452   | 2017 | -0.09 | 0.04 | 1.002727 | 1.0054609 | 21.51498 | 0.044869 | 18.33 |
| 300490 | 2017 | 0.745 | 0.04 | 1.002727 | 1.0054609 | 21.39473 | 0.045013 | 43.67 |
| 932    | 2017 | 0.733 | 0.04 | 1.002727 | 1.0054609 | 25.03982 | 0.302158 | 60.32 |
| 600975 | 2017 | -0.97 | 0.04 | 1.002727 | 1.0054609 | 21.29864 | 0.029484 | 30.95 |
| 300490 | 2017 | 0.574 | 0.04 | 1.002727 | 1.0054609 | 21.55545 | 0.045013 | 43.67 |
| 2261   | 2017 | 1.455 | 0.04 | 1.002727 | 1.0054609 | 22.19763 | 0.017125 | 17.33 |
| 600975 | 2017 | -0.97 | 0.04 | 1.002727 | 1.0054609 | 21.29864 | 0.029484 | 30.95 |
| 600478 | 2017 | 0.658 | 0.04 | 1.002727 | 1.0054609 | 22.63109 | 0.011915 | 17.76 |
| 157    | 2017 | 0.843 | 0.04 | 1.002727 | 1.0054609 | 25.1439  | 0.006906 | 17.78 |
| 2650   | 2017 | 0.142 | 0.04 | 1.002727 | 1.0054609 | 21.7798  | 0.07736  | 18.79 |
| 2650   | 2017 | 0.142 | 0.04 | 1.002727 | 1.0054609 | 21.7798  | 0.07736  | 18.79 |
| 2533   | 2017 | 0.041 | 0.04 | 1.002727 | 1.0054609 | 21.97812 | 0.053143 | 20.83 |
| 300338 | 2017 | 0.854 | 0.04 | 1.002727 | 1.0054609 | 21.82707 | 0.078209 | 15.9  |
| 998    | 2017 | 1.083 | 0.04 | 1.002727 | 1.0054609 | 23.28642 | 0.138682 | 9.49  |
| 601098 | 2017 | 0.385 | 0.04 | 1.002727 | 1.0054609 | 23.70255 | 0.115788 | 61.46 |
| 157    | 2017 | 0.843 | 0.04 | 1.002727 | 1.0054609 | 25.1439  | 0.032646 | 17.78 |
| 2297   | 2017 | 0.872 | 0.04 | 1.002727 | 1.0054609 | 21.53619 | -0.04165 | 15.38 |
| 600478 | 2017 | 0.658 | 0.04 | 1.002727 | 1.0054609 | 22.63109 | 0.011915 | 17.76 |
| 2397   | 2017 | -0.63 | 0.04 | 1.002727 | 1.0054609 | 21.92108 | 0.038476 | 18.21 |
| 2650   | 2017 | 0.142 | 0.04 | 1.002727 | 1.0054609 | 21.7798  | 0.07736  | 18.79 |
| 900    | 2017 | -0.66 | 0.04 | 1.002727 | 1.0054609 | 23.85867 | 0.095573 | 27.19 |
| 989    | 2017 | -0.31 | 0.04 | 1.002727 | 1.0054609 | 22.49424 | 0.159873 | 42.33 |
| 504    | 2017 | -0.59 | 0.04 | 1.002727 | 1.0054609 | 20.10336 | -0.28224 | 25.58 |
| 300187 | 2017 | -0.05 | 0.04 | 1.002727 | 1.0054609 | 21.88402 | 0.086111 | 62.56 |
| 600476 | 2017 | 0.72  | 0.04 | 1.002727 | 1.0054609 | 20.10336 | 0.010582 | 32.98 |
| 157    | 2017 | 0.402 | 0.04 | 1.002727 | 1.0054609 | 25.1439  | 0.032646 | 17.78 |

|        |      |       |      |          |           |          |          |       |
|--------|------|-------|------|----------|-----------|----------|----------|-------|
| 2297   | 2017 | 0.872 | 0.04 | 1.002727 | 1.0054609 | 21.53619 | -0.04165 | 15.38 |
| 300187 | 2017 | -0.05 | 0.04 | 1.002727 | 1.0054609 | 21.88402 | 0.086111 | 62.56 |
| 600744 | 2017 | -0.43 | 0.04 | 1.002727 | 1.0054609 | 23.66005 | -0.41535 | 34.18 |
| 989    | 2017 | -0.41 | 0.04 | 1.002727 | 1.0054609 | 22.49424 | 0.159873 | 42.33 |
| 603998 | 2017 | 0.781 | 0.04 | 1.002727 | 1.0054609 | 21.04022 | 0.062284 | 36.41 |
| 504    | 2017 | -0.59 | 0.04 | 1.002727 | 1.0054609 | 20.10336 | -0.28224 | 25.58 |
| 601098 | 2017 | 0.385 | 0.04 | 1.002727 | 1.0054609 | 23.70255 | 0.115788 | 61.46 |
| 600731 | 2017 | -0.31 | 0.04 | 1.002727 | 1.0054609 | 21.35608 | 0.071398 | 22.91 |
| 2097   | 2017 | -0.68 | 0.04 | 1.002727 | 1.0054609 | 23.23187 | 0.043717 | 24.79 |
| 989    | 2017 | -0.42 | 0.04 | 1.002727 | 1.0054609 | 22.49424 | 0.159873 | 42.33 |
| 600731 | 2017 | 0.671 | 0.04 | 1.002727 | 1.0054609 | 21.35608 | 0.071398 | 22.91 |
| 600744 | 2017 | -0.76 | 0.04 | 1.002727 | 1.0054609 | 23.66005 | -0.41535 | 34.18 |
| 603998 | 2017 | 0.781 | 0.04 | 1.002727 | 1.0054609 | 21.04022 | 0.062284 | 36.41 |
| 2261   | 2017 | 1.455 | 0.04 | 1.002727 | 1.0054609 | 22.19763 | 0.017125 | 17.33 |
| 600478 | 2017 | 0.658 | 0.04 | 1.002727 | 1.0054609 | 22.63109 | 0.011915 | 17.76 |
| 600731 | 2017 | 0.671 | 0.04 | 1.002727 | 1.0054609 | 21.35608 | 0.071398 | 22.91 |
| 600478 | 2017 | 0.592 | 0.04 | 1.002727 | 1.0054609 | 22.63109 | 0.011915 | 17.76 |
| 300015 | 2017 | -0.96 | 0.04 | 1.002727 | 1.0054609 | 22.95466 | 0.144875 | 40.78 |
| 2297   | 2017 | 0.872 | 0.04 | 1.002727 | 1.0054609 | 21.53619 | -0.04165 | 15.38 |
| 600156 | 2017 | -0.19 | 0.04 | 1.002727 | 1.0054609 | 20.76123 | -0.17926 | 40.31 |
| 989    | 2017 | -0.76 | 0.04 | 1.002727 | 1.0054609 | 22.49424 | 0.159873 | 42.33 |
| 900    | 2017 | -0.66 | 0.04 | 1.002727 | 1.0054609 | 23.85867 | 0.095573 | 27.19 |
| 157    | 2017 | 0.101 | 0.04 | 1.002727 | 1.0054609 | 25.1439  | 0.032646 | 17.78 |
| 157    | 2017 | 0.121 | 0.04 | 1.002727 | 1.0054609 | 25.1439  | 0.032646 | 17.78 |
| 300338 | 2017 | 0.08  | 0.04 | 1.002727 | 1.0054609 | 21.82707 | 0.078209 | 15.9  |
| 998    | 2017 | 1.083 | 0.04 | 1.002727 | 1.0054609 | 23.28642 | 0.138682 | 9.49  |
| 157    | 2017 | 0.101 | 0.04 | 1.002727 | 1.0054609 | 25.1439  | 0.032646 | 17.78 |
| 601098 | 2017 | 0.385 | 0.04 | 1.002727 | 1.0054609 | 23.70255 | 0.115788 | 61.46 |
| 603998 | 2017 | 0.781 | 0.04 | 1.002727 | 1.0054609 | 21.04022 | 0.062284 | 36.41 |
| 2297   | 2017 | 0.342 | 0.04 | 1.002727 | 1.0054609 | 21.53619 | -0.04165 | 15.38 |
| 600478 | 2017 | 0.599 | 0.04 | 1.002727 | 1.0054609 | 22.63109 | 0.011915 | 17.76 |
| 300490 | 2017 | 0.685 | 0.04 | 1.002727 | 1.0054609 | 21.55545 | 0.045013 | 43.67 |
| 2452   | 2017 | -0.07 | 0.04 | 1.002727 | 1.0054609 | 21.78383 | 0.044869 | 18.33 |
| 900    | 2017 | -0.66 | 0.04 | 1.002727 | 1.0054609 | 23.85867 | 0.095573 | 27.19 |
| 603998 | 2017 | 0.781 | 0.04 | 1.002727 | 1.0054609 | 21.04022 | 0.062284 | 36.41 |
| 998    | 2017 | 1.083 | 0.04 | 1.002727 | 1.0054609 | 23.28642 | 0.138682 | 9.49  |
| 989    | 2017 | -0.42 | 0.04 | 1.002727 | 1.0054609 | 22.49424 | 0.159873 | 42.33 |
| 2533   | 2017 | -0.54 | 0.04 | 1.002727 | 1.0054609 | 21.97812 | 0.053143 | 20.83 |
| 300338 | 2017 | 0.088 | 0.04 | 1.002727 | 1.0054609 | 21.82707 | 0.078209 | 15.9  |
| 917    | 2017 | 0.392 | 0.04 | 1.002727 | 1.0054609 | 23.89076 | -0.02105 | 16.66 |
| 600744 | 2017 | -0.43 | 0.04 | 1.002727 | 1.0054609 | 23.66005 | -0.41535 | 34.18 |
| 600478 | 2017 | 0.658 | 0.04 | 1.002727 | 1.0054609 | 22.0739  | 0.011915 | 17.76 |
| 600744 | 2017 | -0.93 | 0.04 | 1.002727 | 1.0054609 | 23.66005 | -0.41535 | 34.18 |
| 917    | 2017 | 0.392 | 0.04 | 1.002727 | 1.0054609 | 23.89076 | -0.02105 | 16.66 |
| 157    | 2017 | -0.04 | 0.04 | 1.002727 | 1.0054609 | 25.1439  | 0.032646 | 17.78 |
| 600744 | 2017 | -0.27 | 0.04 | 1.002727 | 1.0054609 | 23.66005 | -0.41535 | 34.18 |
| 300433 | 2017 | -0.39 | 0.04 | 1.002727 | 1.0054609 | 24.29904 | 0.120446 | 74.18 |
| 2650   | 2017 | 0.142 | 0.04 | 1.002727 | 1.0054609 | 21.7798  | 0.07736  | 18.79 |
| 2533   | 2017 | 0.265 | 0.04 | 1.002727 | 1.0054609 | 21.47718 | 0.053143 | 20.83 |
| 2261   | 2017 | 1.603 | 0.04 | 1.002727 | 1.0054609 | 22.19763 | 0.017125 | 17.33 |
| 603998 | 2017 | 0.781 | 0.04 | 1.002727 | 1.0054609 | 21.04022 | 0.062284 | 36.41 |
| 2533   | 2017 | -0.54 | 0.04 | 1.002727 | 1.0054609 | 21.97812 | 0.053143 | 20.83 |
| 157    | 2017 | 0.101 | 0.04 | 1.002727 | 1.0054609 | 25.05387 | 0.032646 | 17.78 |
| 601098 | 2017 | 0.385 | 0.04 | 1.002727 | 1.0054609 | 23.70255 | 0.115788 | 61.46 |

|        |      |       |      |          |            |          |          |       |
|--------|------|-------|------|----------|------------|----------|----------|-------|
| 998    | 2017 | 1.083 | 0.04 | 1.002727 | 1.0054609  | 23.28642 | 0.138682 | 9.49  |
| 157    | 2017 | 0.121 | 0.04 | 1.002727 | 1.0054609  | 25.1439  | 0.032646 | 17.78 |
| 998    | 2017 | 1.083 | 0.04 | 1.002727 | 1.0054609  | 23.28642 | 0.138682 | 9.49  |
| 989    | 2017 | 0.569 | 0.04 | 1.002727 | 1.0054609  | 22.49424 | 0.159873 | 42.33 |
| 600156 | 2017 | -0.76 | 0.04 | 1.002727 | 1.0054609  | 20.76123 | -0.17926 | 40.31 |
| 989    | 2017 | -0.42 | 0.04 | 1.002727 | 1.0054609  | 22.49424 | 0.159873 | 42.33 |
| 300015 | 2017 | -0.96 | 0.04 | 1.002727 | 1.0054609  | 22.95466 | 0.144875 | 40.78 |
| 300267 | 2017 | 0.616 | 0.04 | 1.002727 | 1.0054609  | 22.46725 | 0.095127 | 41.44 |
| 300338 | 2017 | 0.854 | 0.04 | 1.002727 | 1.0054609  | 21.82707 | 0.078209 | 15.9  |
| 2761   | 2017 | -0.77 | 0.04 | 1.002727 | 1.0054609  | 20.65722 | 0.034567 | 28.51 |
| 2397   | 2017 | -0.34 | 0.04 | 1.002727 | 1.0054609  | 21.91734 | 0.038476 | 18.21 |
| 300358 | 2017 | 0.099 | 0.04 | 1.002727 | 1.0054609  | 22.09837 | 0.069174 | 46.16 |
| 300015 | 2017 | -0.87 | 0.04 | 1.002727 | 1.0054609  | 22.55638 | 0.144875 | 40.78 |
| 300433 | 2017 | -0.22 | 0.04 | 1.002727 | 1.0054609  | 24.29904 | 0.120446 | 74.18 |
| 2397   | 2017 | -0.63 | 0.04 | 1.002727 | 1.0054609  | 21.91734 | 0.038476 | 18.21 |
| 600476 | 2017 | 0.72  | 0.04 | 1.002727 | 1.0054609  | 20.10336 | 0.010582 | 32.98 |
| 917    | 2017 | 0.392 | 0.04 | 1.002727 | 1.0054609  | 23.89076 | -0.02105 | 16.66 |
| 600744 | 2017 | -0.27 | 0.04 | 1.002727 | 1.0054609  | 23.66005 | -0.41535 | 34.18 |
| 998    | 2017 | 1.083 | 0.04 | 1.002727 | 1.0054609  | 23.28642 | 0.138682 | 9.49  |
| 2097   | 2017 | -0.23 | 0.04 | 1.002727 | 1.0054609  | 23.23187 | 0.043717 | 24.79 |
| 300515 | 2017 | 0.531 | 0.04 | 1.002727 | 1.0054609  | 20.11934 | 0.052734 | 34.5  |
| 300158 | 2017 | 0.064 | 0    | 0.039108 | 0.00152945 | 22.75319 | 0.052265 | 43.81 |
| 300158 | 2017 | -0.36 | 0    | 0.039108 | 0.00152945 | 22.75319 | 0.052265 | 43.81 |
| 300158 | 2017 | -0.36 | 0    | 0.039108 | 0.00152945 | 22.75319 | 0.052265 | 43.81 |
| 300158 | 2017 | 0.19  | 0    | 0.039108 | 0.00152945 | 22.75319 | 0.052265 | 43.81 |
| 300158 | 2017 | 0.632 | 0    | 0.039108 | 0.00152945 | 22.75319 | 0.052265 | 43.81 |
| 300158 | 2017 | -0.36 | 0    | 0.039108 | 0.00152945 | 22.75319 | 0.052265 | 43.81 |
| 300158 | 2017 | -0.36 | 0    | 0.039108 | 0.00152945 | 22.75319 | 0.052265 | 43.81 |
| 300158 | 2017 | 0.632 | 0    | 0.039108 | 0.00152945 | 22.75319 | 0.052265 | 43.81 |
| 300158 | 2017 | -0.36 | 0    | 0.039108 | 0.00152945 | 22.75319 | 0.052265 | 43.81 |
| 300158 | 2017 | 0.632 | 0    | 0.039108 | 0.00152945 | 22.75319 | 0.052265 | 43.81 |
| 300158 | 2017 | 0.632 | 0    | 0.039108 | 0.00152945 | 22.60113 | 0.052265 | 43.81 |
| 300473 | 2017 | -0.74 | 0    | 0.069101 | 0.00477489 | 22.17472 | 0.079767 | 35.51 |
| 300473 | 2017 | -0.74 | 0    | 0.069101 | 0.00477489 | 22.17472 | 0.079767 | 35.51 |
| 2487   | 2017 | -0.55 | 0    | 0.069101 | 0.00477489 | 21.73705 | 0.023864 | 47.41 |
| 300473 | 2017 | -0.74 | 0    | 0.069101 | 0.00477489 | 22.17472 | 0.079767 | 35.51 |
| 2487   | 2017 | -0.55 | 0    | 0.069101 | 0.00477489 | 21.50009 | 0.023864 | 47.41 |
| 300473 | 2017 | -0.74 | 0    | 0.069101 | 0.00477489 | 22.17472 | 0.079767 | 35.51 |
| 300473 | 2017 | -0.74 | 0    | 0.069101 | 0.00477489 | 21.60442 | 0.079767 | 35.51 |
| 300473 | 2017 | -0.74 | 0    | 0.069101 | 0.00477489 | 22.17472 | 0.079767 | 35.51 |
| 300473 | 2017 | -0.74 | 0    | 0.069101 | 0.00477489 | 22.17472 | 0.079767 | 35.51 |
| 2487   | 2017 | -0.55 | 0    | 0.069101 | 0.00477489 | 21.73705 | 0.023864 | 47.41 |
| 2487   | 2017 | -0.55 | 0    | 0.069101 | 0.00477489 | 21.73705 | 0.023864 | 47.41 |
| 2487   | 2017 | -0.55 | 0    | 0.069101 | 0.00477489 | 21.73705 | 0.023864 | 47.41 |
| 300473 | 2017 | -0.74 | 0    | 0.069101 | 0.00477489 | 22.17472 | 0.079767 | 35.51 |
| 600199 | 2017 | -0.48 | 0.04 | 0.510826 | 0.26094302 | 21.86557 | 0.004067 | 32.07 |
| 600199 | 2017 | -0.6  | 0.04 | 0.510826 | 0.26094302 | 21.86557 | 0.004067 | 32.07 |
| 600199 | 2017 | -0.26 | 0.04 | 0.510826 | 0.26094302 | 21.86557 | 0.004067 | 32.07 |
| 600199 | 2017 | -0.6  | 0.04 | 0.510826 | 0.26094302 | 21.79645 | 0.004067 | 32.07 |
| 600199 | 2017 | -0.26 | 0.04 | 0.510826 | 0.26094302 | 21.86557 | 0.004067 | 32.07 |
| 600328 | 2017 | -0.86 | 0    | 0.290266 | 0.08425434 | 22.62401 | 0.15956  | 33.08 |
| 600328 | 2017 | -0.63 | 0    | 0.290266 | 0.08425434 | 22.62401 | 0.15956  | 33.08 |
| 600328 | 2017 | -0.2  | 0    | 0.290266 | 0.08425434 | 22.62401 | 0.15956  | 33.08 |
| 600328 | 2017 | -0.69 | 0    | 0.290266 | 0.08425434 | 22.62401 | 0.15956  | 33.08 |

|        |      |       |      |          |            |          |          |       |
|--------|------|-------|------|----------|------------|----------|----------|-------|
| 600328 | 2017 | -0.57 | 0    | 0.290266 | 0.08425434 | 21.76935 | 0.15956  | 33.08 |
| 600328 | 2017 | -0.63 | 0    | 0.290266 | 0.08425434 | 22.62401 | 0.15956  | 33.08 |
| 600328 | 2017 | -0.86 | 0    | 0.290266 | 0.08425434 | 22.62401 | 0.15956  | 33.08 |
| 600328 | 2017 | -0.86 | 0    | 0.290266 | 0.08425434 | 22.62401 | 0.15956  | 33.08 |
| 603738 | 2017 | -0.72 | 0.03 | 0.915358 | 0.83788008 | 20.96056 | 0.108917 | 42.59 |
| 603738 | 2017 | -0.19 | 0.03 | 0.915358 | 0.83788008 | 20.96056 | 0.108917 | 42.59 |
| 603738 | 2017 | -0.17 | 0.03 | 0.915358 | 0.83788008 | 20.96056 | 0.108917 | 42.59 |
| 603738 | 2017 | 0.033 | 0.03 | 0.915358 | 0.83788008 | 20.96056 | 0.108917 | 42.59 |
| 603738 | 2017 | -0.17 | 0.03 | 0.915358 | 0.83788008 | 20.96056 | 0.108917 | 42.59 |
| 603738 | 2017 | -0.19 | 0.03 | 0.915358 | 0.83788008 | 20.96056 | 0.108917 | 42.59 |
| 603738 | 2017 | -0.18 | 0.03 | 0.915358 | 0.83788008 | 20.96056 | 0.108917 | 42.59 |
| 603738 | 2017 | -0.17 | 0.03 | 0.915358 | 0.83788008 | 20.67525 | 0.108917 | 42.59 |
| 603738 | 2017 | -0.19 | 0.03 | 0.915358 | 0.83788008 | 20.96056 | 0.108917 | 42.59 |
| 2497   | 2017 | -0.12 | 0.01 | 0.06535  | 0.00427067 | 22.19172 | 0.09478  | 14.32 |
| 2497   | 2017 | -0.12 | 0.01 | 0.06535  | 0.00427067 | 22.19172 | 0.09478  | 14.32 |
| 2497   | 2017 | -0.62 | 0.01 | 0.06535  | 0.00427067 | 22.19172 | 0.09478  | 14.32 |
| 2497   | 2017 | -0.12 | 0.01 | 0.06535  | 0.00427067 | 22.19172 | 0.09478  | 14.32 |
| 2497   | 2017 | 0.229 | 0.01 | 0.06535  | 0.00427067 | 22.19172 | 0.09478  | 14.32 |
| 2497   | 2017 | 0.045 | 0.01 | 0.06535  | 0.00427067 | 22.19172 | 0.09478  | 14.32 |
| 2497   | 2017 | -0.35 | 0.01 | 0.06535  | 0.00427067 | 22.19172 | 0.09478  | 14.32 |
| 2497   | 2017 | -0.55 | 0.01 | 0.06535  | 0.00427067 | 22.19172 | 0.09478  | 14.32 |
| 2497   | 2017 | -0.23 | 0.01 | 0.06535  | 0.00427067 | 22.19172 | 0.09478  | 14.32 |
| 2497   | 2017 | -0.12 | 0.01 | 0.06535  | 0.00427067 | 22.19172 | 0.09478  | 14.32 |
| 2497   | 2017 | -0.51 | 0.01 | 0.06535  | 0.00427067 | 22.19172 | 0.09478  | 14.32 |
| 2497   | 2017 | -0.12 | 0.01 | 0.06535  | 0.00427067 | 22.19172 | 0.09478  | 14.32 |
| 2497   | 2017 | -0.25 | 0.01 | 0.06535  | 0.00427067 | 22.19172 | 0.09478  | 14.32 |
| 2497   | 2017 | -0.12 | 0.01 | 0.06535  | 0.00427067 | 22.19172 | 0.09478  | 14.32 |
| 2497   | 2017 | -0.12 | 0.01 | 0.06535  | 0.00427067 | 22.19172 | 0.09478  | 14.32 |
| 2497   | 2017 | 0.707 | 0.01 | 0.06535  | 0.00427067 | 22.19172 | 0.09478  | 14.32 |
| 2497   | 2017 | -0.29 | 0.01 | 0.06535  | 0.00427067 | 21.76618 | 0.09478  | 14.32 |
| 2497   | 2017 | -0.12 | 0.01 | 0.06535  | 0.00427067 | 22.19172 | 0.09478  | 14.32 |
| 600579 | 2017 | 0.872 | 0.01 | 1.211651 | 1.4680983  | 21.19307 | -0.04058 | 51.56 |
| 2073   | 2017 | 0.372 | 0.01 | 1.211651 | 1.4680983  | 22.85061 | 0.01573  | 15.53 |
| 300001 | 2017 | -0.1  | 0.01 | 1.211651 | 1.4680983  | 23.23083 | 0.068219 | 44    |
| 2073   | 2017 | -0.03 | 0.01 | 1.211651 | 1.4680983  | 22.85061 | 0.01573  | 15.53 |
| 300001 | 2017 | -0.29 | 0.01 | 1.211651 | 1.4680983  | 23.23083 | 0.068219 | 44    |
| 603421 | 2017 | 1.52  | 0.01 | 1.211651 | 1.4680983  | 21.71931 | 0.145    | 28.26 |
| 600060 | 2017 | 0.662 | 0.01 | 1.211651 | 1.4680983  | 23.92999 | 0.071812 | 39.53 |
| 600336 | 2017 | -0.68 | 0.01 | 1.211651 | 1.4680983  | 22.31213 | 0.016293 | 39.07 |
| 300001 | 2017 | 0.268 | 0.01 | 1.211651 | 1.4680983  | 23.23083 | 0.068219 | 44    |
| 300569 | 2017 | -0.72 | 0.01 | 1.211651 | 1.4680983  | 21.62942 | 0.057025 | 30    |
| 2537   | 2017 | 0.809 | 0.01 | 1.211651 | 1.4680983  | 23.66564 | 0.063472 | 22.54 |
| 600690 | 2017 | 0.501 | 0.01 | 1.211651 | 1.4680983  | 25.74206 | 0.193618 | 20.64 |
| 600600 | 2017 | -0.99 | 0.01 | 1.211651 | 1.4680983  | 24.15644 | 0.077766 | 30.83 |
| 603798 | 2017 | 0.616 | 0.01 | 1.211651 | 1.4680983  | 20.75628 | 0.141611 | 29.69 |
| 600690 | 2017 | 0.713 | 0.01 | 1.211651 | 1.4680983  | 25.74206 | 0.193618 | 20.64 |
| 2073   | 2017 | 0.582 | 0.01 | 1.211651 | 1.4680983  | 22.85061 | 0.01573  | 15.53 |
| 599    | 2017 | 0.038 | 0.01 | 1.211651 | 1.4680983  | 22.84909 | 0.036325 | 23.87 |
| 600336 | 2017 | -0.73 | 0.01 | 1.211651 | 1.4680983  | 22.31213 | 0.016293 | 39.07 |
| 2768   | 2017 | -0.18 | 0.01 | 1.211651 | 1.4680983  | 21.50445 | 0.193092 | 52.5  |
| 2094   | 2017 | 0.394 | 0.01 | 1.211651 | 1.4680983  | 22.26234 | 0.155178 | 22.16 |
| 600690 | 2017 | 0.713 | 0.01 | 1.211651 | 1.4680983  | 25.74206 | 0.193618 | 20.64 |
| 300183 | 2017 | 1.872 | 0.01 | 1.211651 | 1.4680983  | 21.84491 | 0.087145 | 22.23 |
| 600690 | 2017 | -0.28 | 0.01 | 1.211651 | 1.4680983  | 25.74206 | 0.193618 | 20.64 |

|        |      |       |      |          |           |          |          |       |
|--------|------|-------|------|----------|-----------|----------|----------|-------|
| 2073   | 2017 | -0.03 | 0.01 | 1.211651 | 1.4680983 | 22.85061 | 0.01573  | 15.53 |
| 300110 | 2017 | 0.71  | 0.01 | 1.211651 | 1.4680983 | 21.78352 | 0.025219 | 16.76 |
| 600336 | 2017 | -0.29 | 0.01 | 1.211651 | 1.4680983 | 22.31213 | 0.016293 | 39.07 |
| 600336 | 2017 | -0.23 | 0.01 | 1.211651 | 1.4680983 | 22.31213 | 0.016293 | 39.07 |
| 300183 | 2017 | 1.778 | 0.01 | 1.211651 | 1.4680983 | 21.84491 | 0.087145 | 22.23 |
| 300001 | 2017 | -0.11 | 0.01 | 1.211651 | 1.4680983 | 23.23083 | 0.068219 | 44    |
| 600690 | 2017 | -0.38 | 0.01 | 1.211651 | 1.4680983 | 25.74206 | 0.193618 | 20.64 |
| 600690 | 2017 | -0.61 | 0.01 | 1.211651 | 1.4680983 | 25.74206 | 0.193618 | 20.64 |
| 600690 | 2017 | -0.41 | 0.01 | 1.211651 | 1.4680983 | 25.74206 | 0.193618 | 20.64 |
| 600690 | 2017 | -0.35 | 0.01 | 1.211651 | 1.4680983 | 25.74206 | 0.193618 | 20.64 |
| 600336 | 2017 | -0.24 | 0.01 | 1.211651 | 1.4680983 | 22.19187 | 0.016293 | 39.07 |
| 600336 | 2017 | -0.35 | 0.01 | 1.211651 | 1.4680983 | 22.31213 | 0.016293 | 39.07 |
| 600690 | 2017 | 0.713 | 0.01 | 1.211651 | 1.4680983 | 25.74206 | 0.193618 | 20.64 |
| 599    | 2017 | 0.058 | 0.01 | 1.211651 | 1.4680983 | 22.84909 | 0.036325 | 23.87 |
| 2073   | 2017 | 0.237 | 0.01 | 1.211651 | 1.4680983 | 22.85061 | 0.01573  | 15.53 |
| 300110 | 2017 | 0.15  | 0.01 | 1.211651 | 1.4680983 | 21.78352 | 0.025219 | 16.76 |
| 600690 | 2017 | -0.06 | 0.01 | 1.211651 | 1.4680983 | 25.74206 | 0.193618 | 20.64 |
| 300110 | 2017 | -0.61 | 0.01 | 1.211651 | 1.4680983 | 21.78352 | 0.025219 | 16.76 |
| 603421 | 2017 | 1.52  | 0.01 | 1.211651 | 1.4680983 | 21.78749 | 0.145    | 28.26 |
| 600690 | 2017 | 0.492 | 0.01 | 1.211651 | 1.4680983 | 25.74206 | 0.193618 | 20.64 |
| 2537   | 2017 | 0.2   | 0.01 | 1.211651 | 1.4680983 | 22.64434 | 0.063472 | 22.54 |
| 2073   | 2017 | -0.12 | 0.01 | 1.211651 | 1.4680983 | 22.85061 | 0.01573  | 15.53 |
| 600690 | 2017 | 0.65  | 0.01 | 1.211651 | 1.4680983 | 25.74206 | 0.193618 | 20.64 |
| 600690 | 2017 | -0.46 | 0.01 | 1.211651 | 1.4680983 | 25.74206 | 0.193618 | 20.64 |
| 600690 | 2017 | -0.61 | 0.01 | 1.211651 | 1.4680983 | 25.74206 | 0.193618 | 20.64 |
| 2498   | 2017 | 0.762 | 0.01 | 1.211651 | 1.4680983 | 22.55179 | 0.054092 | 66.58 |
| 2545   | 2017 | -0.66 | 0.01 | 1.211651 | 1.4680983 | 22.78311 | 0.035434 | 47.21 |
| 600336 | 2017 | -0.29 | 0.01 | 1.211651 | 1.4680983 | 22.31213 | 0.016293 | 39.07 |
| 300183 | 2017 | 2.313 | 0.01 | 1.211651 | 1.4680983 | 21.81734 | 0.087145 | 22.23 |
| 2537   | 2017 | 0.809 | 0.01 | 1.211651 | 1.4680983 | 23.66564 | 0.063472 | 22.54 |
| 600579 | 2017 | 0.604 | 0.01 | 1.211651 | 1.4680983 | 20.80558 | -0.04058 | 51.56 |
| 600690 | 2017 | 0.327 | 0.01 | 1.211651 | 1.4680983 | 25.74206 | 0.193618 | 20.64 |
| 2545   | 2017 | -0.66 | 0.01 | 1.211651 | 1.4680983 | 23.11898 | 0.035434 | 47.21 |
| 600600 | 2017 | -0.48 | 0.01 | 1.211651 | 1.4680983 | 23.71168 | 0.077766 | 30.83 |
| 599    | 2017 | 0.701 | 0.01 | 1.211651 | 1.4680983 | 22.84909 | 0.036325 | 23.87 |
| 600579 | 2017 | 0.978 | 0.01 | 1.211651 | 1.4680983 | 21.19307 | -0.04058 | 51.56 |
| 2545   | 2017 | -0.66 | 0.01 | 1.211651 | 1.4680983 | 23.11898 | 0.035434 | 47.21 |
| 600579 | 2017 | 0.872 | 0.01 | 1.211651 | 1.4680983 | 21.19307 | -0.04058 | 51.56 |
| 600060 | 2017 | 0.26  | 0.01 | 1.211651 | 1.4680983 | 23.79256 | 0.071812 | 39.53 |
| 300001 | 2017 | -0.15 | 0.01 | 1.211651 | 1.4680983 | 23.23083 | 0.068219 | 44    |
| 2073   | 2017 | -0.03 | 0.01 | 1.211651 | 1.4680983 | 22.85061 | 0.01573  | 15.53 |
| 600060 | 2017 | 0.658 | 0.01 | 1.211651 | 1.4680983 | 23.92999 | 0.071812 | 39.53 |
| 2537   | 2017 | 0.809 | 0.01 | 1.211651 | 1.4680983 | 23.66564 | 0.063472 | 22.54 |
| 600600 | 2017 | -0.48 | 0.01 | 1.211651 | 1.4680983 | 24.15644 | 0.077766 | 30.83 |
| 600336 | 2017 | -0.23 | 0.01 | 1.211651 | 1.4680983 | 22.31213 | 0.016293 | 39.07 |
| 300110 | 2017 | -0.5  | 0.01 | 1.211651 | 1.4680983 | 21.78352 | 0.025219 | 16.76 |
| 600690 | 2017 | 0.051 | 0.01 | 1.211651 | 1.4680983 | 25.74206 | 0.193618 | 20.64 |
| 600336 | 2017 | -0.29 | 0.01 | 1.211651 | 1.4680983 | 22.31213 | 0.016293 | 39.07 |
| 603421 | 2017 | 0.946 | 0.01 | 1.211651 | 1.4680983 | 21.71931 | 0.145    | 28.26 |
| 600600 | 2017 | -0.99 | 0.01 | 1.211651 | 1.4680983 | 24.15644 | 0.077766 | 30.83 |
| 300183 | 2017 | 1.872 | 0.01 | 1.211651 | 1.4680983 | 21.84491 | 0.087145 | 22.23 |
| 603577 | 2017 | -0.58 | 0.01 | 1.211651 | 1.4680983 | 21.19054 | 0.053717 | 28.09 |
| 600690 | 2017 | -0.37 | 0.01 | 1.211651 | 1.4680983 | 25.74206 | 0.193618 | 20.64 |
| 600579 | 2017 | 0.872 | 0.01 | 1.211651 | 1.4680983 | 21.19307 | -0.04058 | 51.56 |

|        |      |       |      |          |           |          |          |       |
|--------|------|-------|------|----------|-----------|----------|----------|-------|
| 600690 | 2017 | 0.713 | 0.01 | 1.211651 | 1.4680983 | 25.74206 | 0.193618 | 20.64 |
| 600690 | 2017 | -0.61 | 0.01 | 1.211651 | 1.4680983 | 25.74206 | 0.193618 | 20.64 |
| 600690 | 2017 | -0.06 | 0.01 | 1.211651 | 1.4680983 | 25.74206 | 0.193618 | 20.64 |
| 600336 | 2017 | -0.29 | 0.01 | 1.211651 | 1.4680983 | 22.31213 | 0.016293 | 39.07 |
| 600579 | 2017 | 0.872 | 0.01 | 1.211651 | 1.4680983 | 21.19307 | -0.04058 | 51.56 |
| 600690 | 2017 | -0.46 | 0.01 | 1.211651 | 1.4680983 | 25.74206 | 0.193618 | 20.64 |
| 2768   | 2017 | -0.18 | 0.01 | 1.211651 | 1.4680983 | 21.50445 | 0.193092 | 52.5  |
| 2498   | 2017 | -0.36 | 0.01 | 1.211651 | 1.4680983 | 22.55179 | 0.054092 | 66.58 |
| 600690 | 2017 | 0.02  | 0.01 | 1.211651 | 1.4680983 | 25.74206 | 0.193618 | 20.64 |
| 2073   | 2017 | -0.12 | 0.01 | 1.211651 | 1.4680983 | 22.70038 | 0.01573  | 15.53 |
| 2073   | 2017 | -0.12 | 0.01 | 1.211651 | 1.4680983 | 22.85061 | 0.01573  | 15.53 |
| 2768   | 2017 | -0.09 | 0.01 | 1.211651 | 1.4680983 | 21.50445 | 0.193092 | 52.5  |
| 600336 | 2017 | -0.49 | 0.01 | 1.211651 | 1.4680983 | 22.31213 | 0.016293 | 39.07 |
| 300001 | 2017 | -0.53 | 0.01 | 1.211651 | 1.4680983 | 23.23083 | 0.068219 | 44    |
| 2073   | 2017 | -0.03 | 0.01 | 1.211651 | 1.4680983 | 22.85061 | 0.01573  | 15.53 |
| 600690 | 2017 | -0.49 | 0.01 | 1.211651 | 1.4680983 | 25.74206 | 0.193618 | 20.64 |
| 2073   | 2017 | 0.36  | 0.01 | 1.211651 | 1.4680983 | 22.85061 | 0.01573  | 15.53 |
| 603421 | 2017 | 0.327 | 0.01 | 1.211651 | 1.4680983 | 21.71931 | 0.145    | 28.26 |
| 600690 | 2017 | -0.28 | 0.01 | 1.211651 | 1.4680983 | 25.74206 | 0.193618 | 20.64 |
| 300001 | 2017 | 0.003 | 0.01 | 1.211651 | 1.4680983 | 23.23083 | 0.068219 | 44    |
| 599    | 2017 | 0.018 | 0.01 | 1.211651 | 1.4680983 | 22.29552 | 0.036325 | 23.87 |
| 2094   | 2017 | -0.93 | 0.01 | 1.211651 | 1.4680983 | 22.26234 | 0.155178 | 22.16 |
| 2545   | 2017 | -0.66 | 0.01 | 1.211651 | 1.4680983 | 23.11898 | 0.035434 | 47.21 |
| 600336 | 2017 | -0.73 | 0.01 | 1.211651 | 1.4680983 | 22.31213 | 0.016293 | 39.07 |
| 600690 | 2017 | 0.206 | 0.01 | 1.211651 | 1.4680983 | 25.74206 | 0.193618 | 20.64 |
| 300001 | 2017 | -0.26 | 0.01 | 1.211651 | 1.4680983 | 23.23083 | 0.068219 | 44    |
| 2537   | 2017 | -0.52 | 0.01 | 1.211651 | 1.4680983 | 23.66564 | 0.063472 | 22.54 |
| 603577 | 2017 | -0.58 | 0.01 | 1.211651 | 1.4680983 | 21.19054 | 0.053717 | 28.09 |
| 600690 | 2017 | -0.39 | 0.01 | 1.211651 | 1.4680983 | 25.74206 | 0.193618 | 20.64 |
| 600690 | 2017 | 0.547 | 0.01 | 1.211651 | 1.4680983 | 25.74206 | 0.193618 | 20.64 |
| 2537   | 2017 | 0.209 | 0.01 | 1.211651 | 1.4680983 | 23.66564 | 0.063472 | 22.54 |
| 600690 | 2017 | -0.61 | 0.01 | 1.211651 | 1.4680983 | 25.74206 | 0.193618 | 20.64 |
| 2537   | 2017 | -0.52 | 0.01 | 1.211651 | 1.4680983 | 23.66564 | 0.063472 | 22.54 |
| 2498   | 2017 | -0.32 | 0.01 | 1.211651 | 1.4680983 | 22.55179 | 0.054092 | 66.58 |
| 601058 | 2017 | -0.86 | 0.01 | 1.211651 | 1.4680983 | 23.43497 | 0.052943 | 14.21 |
| 600690 | 2017 | 0.713 | 0.01 | 1.211651 | 1.4680983 | 25.74206 | 0.193618 | 20.64 |
| 601058 | 2017 | -0.68 | 0.01 | 1.211651 | 1.4680983 | 23.43497 | 0.052943 | 14.21 |
| 601058 | 2017 | -0.68 | 0.01 | 1.211651 | 1.4680983 | 23.43497 | 0.052943 | 14.21 |
| 300001 | 2017 | -0.2  | 0.01 | 1.211651 | 1.4680983 | 23.23083 | 0.068219 | 44    |
| 2545   | 2017 | -0.66 | 0.01 | 1.211651 | 1.4680983 | 23.11898 | 0.035434 | 47.21 |
| 599    | 2017 | 0.018 | 0.01 | 1.211651 | 1.4680983 | 22.84909 | 0.036325 | 23.87 |
| 603421 | 2017 | 0.659 | 0.01 | 1.211651 | 1.4680983 | 21.71931 | 0.145    | 28.26 |
| 600060 | 2017 | 0.26  | 0.01 | 1.211651 | 1.4680983 | 23.92999 | 0.071812 | 39.53 |
| 600060 | 2017 | 0.26  | 0.01 | 1.211651 | 1.4680983 | 23.92999 | 0.071812 | 39.53 |
| 600690 | 2017 | -0.45 | 0.01 | 1.211651 | 1.4680983 | 25.74206 | 0.193618 | 20.64 |
| 2545   | 2017 | -0.66 | 0.01 | 1.211651 | 1.4680983 | 23.11898 | 0.035434 | 47.21 |
| 600060 | 2017 | 0.258 | 0.01 | 1.211651 | 1.4680983 | 23.92999 | 0.071812 | 39.53 |
| 300110 | 2017 | 0.15  | 0.01 | 1.211651 | 1.4680983 | 21.78352 | 0.025219 | 16.76 |
| 2094   | 2017 | 0.394 | 0.01 | 1.211651 | 1.4680983 | 22.03501 | 0.155178 | 22.16 |
| 2498   | 2017 | -0.56 | 0.01 | 1.211651 | 1.4680983 | 22.55179 | 0.054092 | 66.58 |
| 600690 | 2017 | -0.48 | 0.01 | 1.211651 | 1.4680983 | 25.74206 | 0.193618 | 20.64 |
| 600060 | 2017 | 0.684 | 0.01 | 1.211651 | 1.4680983 | 23.92999 | 0.071812 | 39.53 |
| 2537   | 2017 | 0.809 | 0.01 | 1.211651 | 1.4680983 | 23.66564 | 0.063472 | 22.54 |
| 600336 | 2017 | -0.29 | 0.01 | 1.211651 | 1.4680983 | 22.31213 | 0.016293 | 39.07 |

|        |      |       |      |          |           |          |          |       |
|--------|------|-------|------|----------|-----------|----------|----------|-------|
| 603421 | 2017 | 1.063 | 0.01 | 1.211651 | 1.4680983 | 21.71931 | 0.145    | 28.26 |
| 2073   | 2017 | -0.03 | 0.01 | 1.211651 | 1.4680983 | 22.85061 | 0.01573  | 15.53 |
| 300569 | 2017 | -0.72 | 0.01 | 1.211651 | 1.4680983 | 21.62942 | 0.057025 | 30    |
| 600600 | 2017 | -0.73 | 0.01 | 1.211651 | 1.4680983 | 24.15644 | 0.077766 | 30.83 |
| 601058 | 2017 | -0.68 | 0.01 | 1.211651 | 1.4680983 | 23.43497 | 0.052943 | 14.21 |
| 300569 | 2017 | -0.72 | 0.01 | 1.211651 | 1.4680983 | 21.62942 | 0.057025 | 30    |
| 600690 | 2017 | 0.206 | 0.01 | 1.211651 | 1.4680983 | 25.74206 | 0.193618 | 20.64 |
| 300001 | 2017 | -0.18 | 0.01 | 1.211651 | 1.4680983 | 23.23083 | 0.068219 | 44    |
| 603798 | 2017 | 0.616 | 0.01 | 1.211651 | 1.4680983 | 20.6526  | 0.141611 | 29.69 |
| 599    | 2017 | 0.701 | 0.01 | 1.211651 | 1.4680983 | 22.84909 | 0.036325 | 23.87 |
| 600600 | 2017 | -0.99 | 0.01 | 1.211651 | 1.4680983 | 24.15644 | 0.077766 | 30.83 |
| 300001 | 2017 | -0.53 | 0.01 | 1.211651 | 1.4680983 | 23.23083 | 0.068219 | 44    |
| 300569 | 2017 | -0.72 | 0.01 | 1.211651 | 1.4680983 | 21.62942 | 0.057025 | 30    |
| 600690 | 2017 | 0.051 | 0.01 | 1.211651 | 1.4680983 | 25.74206 | 0.193618 | 20.64 |
| 300183 | 2017 | 1.651 | 0.01 | 1.211651 | 1.4680983 | 21.84491 | 0.087145 | 22.23 |
| 2073   | 2017 | 0.332 | 0.01 | 1.211651 | 1.4680983 | 22.85061 | 0.01573  | 15.53 |
| 2094   | 2017 | 0.394 | 0.01 | 1.211651 | 1.4680983 | 22.26234 | 0.155178 | 22.16 |
| 2768   | 2017 | -0.62 | 0.01 | 1.211651 | 1.4680983 | 21.50445 | 0.193092 | 52.5  |
| 2073   | 2017 | 0.548 | 0.01 | 1.211651 | 1.4680983 | 22.85061 | 0.01573  | 15.53 |
| 601058 | 2017 | -0.68 | 0.01 | 1.211651 | 1.4680983 | 22.94492 | 0.052943 | 14.21 |
| 2537   | 2017 | -0.52 | 0.01 | 1.211651 | 1.4680983 | 23.66564 | 0.063472 | 22.54 |
| 300001 | 2017 | -0.18 | 0.01 | 1.211651 | 1.4680983 | 23.23083 | 0.068219 | 44    |
| 300183 | 2017 | 2.048 | 0.01 | 1.211651 | 1.4680983 | 21.84491 | 0.087145 | 22.23 |
| 2537   | 2017 | 0.809 | 0.01 | 1.211651 | 1.4680983 | 23.66564 | 0.063472 | 22.54 |
| 300183 | 2017 | 1.651 | 0.01 | 1.211651 | 1.4680983 | 21.84491 | 0.087145 | 22.23 |
| 599    | 2017 | 0.058 | 0.01 | 1.211651 | 1.4680983 | 22.84909 | 0.036325 | 23.87 |
| 600690 | 2017 | -0.61 | 0.01 | 1.211651 | 1.4680983 | 25.74206 | 0.193618 | 20.64 |
| 300001 | 2017 | -0.39 | 0.01 | 1.211651 | 1.4680983 | 23.23083 | 0.068219 | 44    |
| 603577 | 2017 | -0.58 | 0.01 | 1.211651 | 1.4680983 | 21.18289 | 0.053717 | 28.09 |
| 600060 | 2017 | 0.26  | 0.01 | 1.211651 | 1.4680983 | 23.92999 | 0.071812 | 39.53 |
| 600336 | 2017 | -0.29 | 0.01 | 1.211651 | 1.4680983 | 22.31213 | 0.016293 | 39.07 |
| 2073   | 2017 | 0.041 | 0.01 | 1.211651 | 1.4680983 | 22.85061 | 0.01573  | 15.53 |
| 2498   | 2017 | -0.56 | 0.01 | 1.211651 | 1.4680983 | 22.55179 | 0.054092 | 66.58 |
| 2537   | 2017 | -0.52 | 0.01 | 1.211651 | 1.4680983 | 23.66564 | 0.063472 | 22.54 |
| 300569 | 2017 | -0.72 | 0.01 | 1.211651 | 1.4680983 | 21.48033 | 0.057025 | 30    |
| 600579 | 2017 | 0.872 | 0.01 | 1.211651 | 1.4680983 | 21.19307 | -0.04058 | 51.56 |
| 600690 | 2017 | -0.06 | 0.01 | 1.211651 | 1.4680983 | 25.74206 | 0.193618 | 20.64 |
| 300569 | 2017 | -0.72 | 0.01 | 1.211651 | 1.4680983 | 21.62942 | 0.057025 | 30    |
| 2545   | 2017 | -0.66 | 0.01 | 1.211651 | 1.4680983 | 23.11898 | 0.035434 | 47.21 |
| 601058 | 2017 | -0.68 | 0.01 | 1.211651 | 1.4680983 | 23.43497 | 0.052943 | 14.21 |
| 2073   | 2017 | 0.487 | 0.01 | 1.211651 | 1.4680983 | 22.85061 | 0.01573  | 15.53 |
| 300001 | 2017 | 0.798 | 0.01 | 1.211651 | 1.4680983 | 23.23083 | 0.068219 | 44    |
| 600690 | 2017 | 0.047 | 0.01 | 1.211651 | 1.4680983 | 25.74206 | 0.193618 | 20.64 |
| 300001 | 2017 | -0.53 | 0.01 | 1.211651 | 1.4680983 | 23.23083 | 0.068219 | 44    |
| 600336 | 2017 | -0.34 | 0.01 | 1.211651 | 1.4680983 | 22.31213 | 0.016293 | 39.07 |
| 603798 | 2017 | 0.616 | 0.01 | 1.211651 | 1.4680983 | 20.75628 | 0.141611 | 29.69 |
| 600690 | 2017 | 0.713 | 0.01 | 1.211651 | 1.4680983 | 25.74206 | 0.193618 | 20.64 |
| 2545   | 2017 | -0.66 | 0.01 | 1.211651 | 1.4680983 | 23.11898 | 0.035434 | 47.21 |
| 2498   | 2017 | -0.32 | 0.01 | 1.211651 | 1.4680983 | 22.55179 | 0.054092 | 66.58 |
| 600690 | 2017 | -0.56 | 0.01 | 1.211651 | 1.4680983 | 25.74206 | 0.193618 | 20.64 |
| 600690 | 2017 | -0.08 | 0.01 | 1.211651 | 1.4680983 | 24.31241 | 0.193618 | 20.64 |
| 600060 | 2017 | 0.684 | 0.01 | 1.211651 | 1.4680983 | 23.92999 | 0.071812 | 39.53 |
| 601058 | 2017 | -0.68 | 0.01 | 1.211651 | 1.4680983 | 23.43497 | 0.052943 | 14.21 |
| 600690 | 2017 | -0.61 | 0.01 | 1.211651 | 1.4680983 | 25.74206 | 0.193618 | 20.64 |



|        |      |       |      |          |            |          |          |       |
|--------|------|-------|------|----------|------------|----------|----------|-------|
| 300110 | 2017 | -0.06 | 0.01 | 1.211651 | 1.4680983  | 21.78352 | 0.025219 | 16.76 |
| 2498   | 2017 | -0.32 | 0.01 | 1.211651 | 1.4680983  | 22.55179 | 0.054092 | 66.58 |
| 2073   | 2017 | 1.2   | 0.01 | 1.211651 | 1.4680983  | 22.85061 | 0.01573  | 15.53 |
| 2498   | 2017 | -0.32 | 0.01 | 1.211651 | 1.4680983  | 22.55179 | 0.054092 | 66.58 |
| 2768   | 2017 | -0.18 | 0.01 | 1.211651 | 1.4680983  | 21.44455 | 0.193092 | 52.5  |
| 300183 | 2017 | 1.737 | 0.01 | 1.211651 | 1.4680983  | 21.84491 | 0.087145 | 22.23 |
| 600690 | 2017 | 0.334 | 0.01 | 1.211651 | 1.4680983  | 25.74206 | 0.193618 | 20.64 |
| 2094   | 2017 | 0.394 | 0.01 | 1.211651 | 1.4680983  | 22.26234 | 0.155178 | 22.16 |
| 300183 | 2017 | 1.737 | 0.01 | 1.211651 | 1.4680983  | 21.84491 | 0.087145 | 22.23 |
| 600690 | 2017 | -0.47 | 0.01 | 1.211651 | 1.4680983  | 25.74206 | 0.193618 | 20.64 |
| 2498   | 2017 | -0.32 | 0.01 | 1.211651 | 1.4680983  | 22.55179 | 0.054092 | 66.58 |
| 300001 | 2017 | -0.13 | 0.01 | 1.211651 | 1.4680983  | 22.81696 | 0.068219 | 44    |
| 601058 | 2017 | -0.86 | 0.01 | 1.211651 | 1.4680983  | 23.43497 | 0.052943 | 14.21 |
| 603577 | 2017 | -0.58 | 0.01 | 1.211651 | 1.4680983  | 21.19054 | 0.053717 | 28.09 |
| 603577 | 2017 | -0.58 | 0.01 | 1.211651 | 1.4680983  | 21.19054 | 0.053717 | 28.09 |
| 600060 | 2017 | 0.684 | 0.01 | 1.211651 | 1.4680983  | 23.92999 | 0.071812 | 39.53 |
| 600690 | 2017 | 0.22  | 0.01 | 1.211651 | 1.4680983  | 25.74206 | 0.193618 | 20.64 |
| 600060 | 2017 | 0.26  | 0.01 | 1.211651 | 1.4680983  | 23.92999 | 0.071812 | 39.53 |
| 599    | 2017 | 0.018 | 0.01 | 1.211651 | 1.4680983  | 22.84909 | 0.036325 | 23.87 |
| 600690 | 2017 | -0.61 | 0.01 | 1.211651 | 1.4680983  | 25.74206 | 0.193618 | 20.64 |
| 600600 | 2017 | -0.99 | 0.01 | 1.211651 | 1.4680983  | 24.15644 | 0.077766 | 30.83 |
| 2537   | 2017 | 0.809 | 0.01 | 1.211651 | 1.4680983  | 23.66564 | 0.063472 | 22.54 |
| 2498   | 2017 | -0.39 | 0.01 | 1.211651 | 1.4680983  | 22.55179 | 0.054092 | 66.58 |
| 599    | 2017 | 0.038 | 0.01 | 1.211651 | 1.4680983  | 22.84909 | 0.036325 | 23.87 |
| 600060 | 2017 | 0.551 | 0.01 | 1.211651 | 1.4680983  | 23.92999 | 0.071812 | 39.53 |
| 2073   | 2017 | 0.372 | 0.01 | 1.211651 | 1.4680983  | 22.85061 | 0.01573  | 15.53 |
| 600336 | 2017 | -0.73 | 0.01 | 1.211651 | 1.4680983  | 22.31213 | 0.016293 | 39.07 |
| 600690 | 2017 | 0.713 | 0.01 | 1.211651 | 1.4680983  | 25.74206 | 0.193618 | 20.64 |
| 600060 | 2017 | 0.684 | 0.01 | 1.211651 | 1.4680983  | 23.92999 | 0.071812 | 39.53 |
| 300110 | 2017 | -0.5  | 0.01 | 1.211651 | 1.4680983  | 21.71414 | 0.025219 | 16.76 |
| 300183 | 2017 | 1.253 | 0.01 | 1.211651 | 1.4680983  | 21.84491 | 0.087145 | 22.23 |
| 599    | 2017 | -0.21 | 0.01 | 1.211651 | 1.4680983  | 22.84909 | 0.036325 | 23.87 |
| 2498   | 2017 | -0.32 | 0.01 | 1.211651 | 1.4680983  | 22.49826 | 0.054092 | 66.58 |
| 2073   | 2017 | -0.03 | 0.01 | 1.211651 | 1.4680983  | 22.85061 | 0.01573  | 15.53 |
| 2094   | 2017 | -0.93 | 0.01 | 1.211651 | 1.4680983  | 22.26234 | 0.155178 | 22.16 |
| 600690 | 2017 | -0.52 | 0.01 | 1.211651 | 1.4680983  | 25.74206 | 0.193618 | 20.64 |
| 2545   | 2017 | -0.66 | 0.01 | 1.211651 | 1.4680983  | 23.11898 | 0.035434 | 47.21 |
| 2094   | 2017 | 0.205 | 0.01 | 1.211651 | 1.4680983  | 22.26234 | 0.155178 | 22.16 |
| 600690 | 2017 | 0.713 | 0.01 | 1.211651 | 1.4680983  | 25.74206 | 0.193618 | 20.64 |
| 300210 | 2017 | 0.291 | 0    | 0.017602 | 0.00030984 | 21.49368 | 0.043355 | 43.94 |
| 2123   | 2017 | 0.092 | 0    | 0.017602 | 0.00030984 | 22.63431 | 0.050486 | 19.03 |
| 300210 | 2017 | 0.291 | 0    | 0.017602 | 0.00030984 | 21.58262 | 0.043355 | 43.94 |
| 2667   | 2017 | -0.12 | 0    | 0.017602 | 0.00030984 | 20.59695 | 0.030167 | 24.86 |
| 898    | 2017 | -0.32 | 0    | 0.017602 | 0.00030984 | 25.21419 | 0.11138  | 58.31 |
| 603315 | 2017 | 0.398 | 0    | 0.017602 | 0.00030984 | 21.04552 | 0.009034 | 55.43 |
| 2123   | 2017 | 0.551 | 0    | 0.017602 | 0.00030984 | 22.63431 | 0.050486 | 19.03 |
| 2123   | 2017 | 1.056 | 0    | 0.017602 | 0.00030984 | 22.63431 | 0.050486 | 19.03 |
| 898    | 2017 | -0.32 | 0    | 0.017602 | 0.00030984 | 25.21419 | 0.11138  | 58.31 |
| 300202 | 2017 | 0.646 | 0    | 0.017602 | 0.00030984 | 21.69683 | 0.030206 | 28.21 |
| 2123   | 2017 | 0.89  | 0    | 0.017602 | 0.00030984 | 22.63431 | 0.050486 | 19.03 |
| 603315 | 2017 | 0.398 | 0    | 0.017602 | 0.00030984 | 21.04552 | 0.009034 | 55.43 |
| 2123   | 2017 | 0.89  | 0    | 0.017602 | 0.00030984 | 22.63431 | 0.050486 | 19.03 |
| 2123   | 2017 | 1.056 | 0    | 0.017602 | 0.00030984 | 22.63431 | 0.050486 | 19.03 |
| 2123   | 2017 | 0.89  | 0    | 0.017602 | 0.00030984 | 22.63431 | 0.050486 | 19.03 |

|        |      |       |      |          |            |          |          |       |
|--------|------|-------|------|----------|------------|----------|----------|-------|
| 300210 | 2017 | -0.15 | 0    | 0.017602 | 0.00030984 | 21.58262 | 0.043355 | 43.94 |
| 300202 | 2017 | 1.214 | 0    | 0.017602 | 0.00030984 | 21.69683 | 0.030206 | 28.21 |
| 2123   | 2017 | 0.89  | 0    | 0.017602 | 0.00030984 | 22.63431 | 0.050486 | 19.03 |
| 2667   | 2017 | -0.12 | 0    | 0.017602 | 0.00030984 | 20.59435 | 0.030167 | 24.86 |
| 300202 | 2017 | 1.214 | 0    | 0.017602 | 0.00030984 | 21.69683 | 0.030206 | 28.21 |
| 603315 | 2017 | 0.398 | 0    | 0.017602 | 0.00030984 | 20.96493 | 0.009034 | 55.43 |
| 300210 | 2017 | -0.15 | 0    | 0.017602 | 0.00030984 | 21.58262 | 0.043355 | 43.94 |
| 300210 | 2017 | 0.023 | 0    | 0.017602 | 0.00030984 | 21.58262 | 0.043355 | 43.94 |
| 300210 | 2017 | -0.15 | 0    | 0.017602 | 0.00030984 | 21.58262 | 0.043355 | 43.94 |
| 300210 | 2017 | -0.15 | 0    | 0.017602 | 0.00030984 | 21.58262 | 0.043355 | 43.94 |
| 300202 | 2017 | 1.214 | 0    | 0.017602 | 0.00030984 | 21.69683 | 0.030206 | 28.21 |
| 300202 | 2017 | 0.197 | 0    | 0.017602 | 0.00030984 | 21.69683 | 0.030206 | 28.21 |
| 2123   | 2017 | 1.056 | 0    | 0.017602 | 0.00030984 | 22.63431 | 0.050486 | 19.03 |
| 300202 | 2017 | 1.214 | 0    | 0.017602 | 0.00030984 | 21.69683 | 0.030206 | 28.21 |
| 300210 | 2017 | -0.15 | 0    | 0.017602 | 0.00030984 | 21.58262 | 0.043355 | 43.94 |
| 2123   | 2017 | 0.671 | 0    | 0.017602 | 0.00030984 | 22.63431 | 0.050486 | 19.03 |
| 898    | 2017 | -0.32 | 0    | 0.017602 | 0.00030984 | 25.21419 | 0.11138  | 58.31 |
| 300210 | 2017 | -0.15 | 0    | 0.017602 | 0.00030984 | 21.58262 | 0.043355 | 43.94 |
| 2123   | 2017 | 0.89  | 0    | 0.017602 | 0.00030984 | 22.63431 | 0.050486 | 19.03 |
| 898    | 2017 | -0.32 | 0    | 0.017602 | 0.00030984 | 25.21419 | 0.11138  | 58.31 |
| 300202 | 2017 | 0.197 | 0    | 0.017602 | 0.00030984 | 21.69683 | 0.030206 | 28.21 |
| 898    | 2017 | -0.32 | 0    | 0.017602 | 0.00030984 | 25.18884 | 0.11138  | 58.31 |
| 2123   | 2017 | 0.89  | 0    | 0.017602 | 0.00030984 | 22.48316 | 0.050486 | 19.03 |
| 300202 | 2017 | -0.11 | 0    | 0.017602 | 0.00030984 | 21.69683 | 0.030206 | 28.21 |
| 300202 | 2017 | 0.433 | 0    | 0.017602 | 0.00030984 | 21.50715 | 0.030206 | 28.21 |
| 2667   | 2017 | -0.12 | 0    | 0.017602 | 0.00030984 | 20.59695 | 0.030167 | 24.86 |
| 898    | 2017 | -0.32 | 0    | 0.017602 | 0.00030984 | 25.21419 | 0.11138  | 58.31 |
| 600567 | 2017 | -0.03 | 0.04 | 0.992034 | 0.98413218 | 24.01653 | 0.193411 | 28.08 |
| 2147   | 2017 | -0.17 | 0.04 | 0.992034 | 0.98413218 | 23.52265 | 0.188928 | 62.05 |
| 600567 | 2017 | -0.07 | 0.04 | 0.992034 | 0.98413218 | 24.01653 | 0.193411 | 28.08 |
| 2347   | 2017 | 0.013 | 0.04 | 0.992034 | 0.98413218 | 21.41461 | -0.09479 | 31.24 |
| 2147   | 2017 | -0.67 | 0.04 | 0.992034 | 0.98413218 | 23.52265 | 0.188928 | 62.05 |
| 2057   | 2017 | 0.142 | 0.04 | 0.992034 | 0.98413218 | 21.22026 | 0.108703 | 23.09 |
| 600375 | 2017 | -0.28 | 0.04 | 0.992034 | 0.98413218 | 23.08786 | 0.02308  | 10.89 |
| 2347   | 2017 | 0.013 | 0.04 | 0.992034 | 0.98413218 | 21.41461 | -0.09479 | 31.24 |
| 2147   | 2017 | -0.2  | 0.04 | 0.992034 | 0.98413218 | 23.59262 | 0.188928 | 62.05 |
| 600375 | 2017 | -0.28 | 0.04 | 0.992034 | 0.98413218 | 23.08786 | 0.02308  | 10.89 |
| 600808 | 2017 | 0.228 | 0.04 | 0.992034 | 0.98413218 | 25.00259 | 0.186224 | 45.54 |
| 600808 | 2017 | -0.75 | 0.04 | 0.992034 | 0.98413218 | 25.00259 | 0.186224 | 45.54 |
| 600808 | 2017 | 0.575 | 0.04 | 0.992034 | 0.98413218 | 25.00259 | 0.186224 | 45.54 |
| 600808 | 2017 | -0.15 | 0.04 | 0.992034 | 0.98413218 | 25.00259 | 0.186224 | 45.54 |
| 600375 | 2017 | -0.43 | 0.04 | 0.992034 | 0.98413218 | 23.08786 | 0.02308  | 10.89 |
| 600375 | 2017 | -0.21 | 0.04 | 0.992034 | 0.98413218 | 23.08786 | 0.02308  | 10.89 |
| 2347   | 2017 | 0.013 | 0.04 | 0.992034 | 0.98413218 | 21.4079  | -0.09479 | 31.24 |
| 2347   | 2017 | 0.145 | 0.04 | 0.992034 | 0.98413218 | 21.41461 | -0.09479 | 31.24 |
| 2347   | 2017 | 0.013 | 0.04 | 0.992034 | 0.98413218 | 21.41461 | -0.09479 | 31.24 |
| 600375 | 2017 | -0.45 | 0.04 | 0.992034 | 0.98413218 | 23.08786 | 0.02308  | 10.89 |
| 600375 | 2017 | -0.6  | 0.04 | 0.992034 | 0.98413218 | 23.08786 | 0.02308  | 10.89 |
| 600375 | 2017 | -0.2  | 0.04 | 0.992034 | 0.98413218 | 23.08786 | 0.02308  | 10.89 |
| 2147   | 2017 | 0.462 | 0.04 | 0.992034 | 0.98413218 | 23.52265 | 0.188928 | 62.05 |
| 2147   | 2017 | -0.67 | 0.04 | 0.992034 | 0.98413218 | 23.52265 | 0.188928 | 62.05 |
| 2147   | 2017 | -0.11 | 0.04 | 0.992034 | 0.98413218 | 23.52265 | 0.188928 | 62.05 |
| 600375 | 2017 | -0.43 | 0.04 | 0.992034 | 0.98413218 | 23.08786 | 0.02308  | 10.89 |
| 2347   | 2017 | 0.178 | 0.04 | 0.992034 | 0.98413218 | 21.41461 | -0.09479 | 31.24 |

|        |      |       |      |          |            |          |          |       |
|--------|------|-------|------|----------|------------|----------|----------|-------|
| 2057   | 2017 | 0.013 | 0.04 | 0.992034 | 0.98413218 | 21.22026 | 0.108703 | 23.09 |
| 600375 | 2017 | -0.6  | 0.04 | 0.992034 | 0.98413218 | 22.68643 | 0.02308  | 10.89 |
| 600567 | 2017 | -0.4  | 0.04 | 0.992034 | 0.98413218 | 23.64795 | 0.193411 | 28.08 |
| 2057   | 2017 | 0.107 | 0.04 | 0.992034 | 0.98413218 | 21.22026 | 0.108703 | 23.09 |
| 2057   | 2017 | -0.44 | 0.04 | 0.992034 | 0.98413218 | 21.22026 | 0.108703 | 23.09 |
| 600567 | 2017 | -0.17 | 0.04 | 0.992034 | 0.98413218 | 24.01653 | 0.193411 | 28.08 |
| 2147   | 2017 | -0.67 | 0.04 | 0.992034 | 0.98413218 | 23.52265 | 0.188928 | 62.05 |
| 600808 | 2017 | -0.24 | 0.04 | 0.992034 | 0.98413218 | 24.81836 | 0.186224 | 45.54 |
| 2347   | 2017 | -0.22 | 0.04 | 0.992034 | 0.98413218 | 21.41461 | -0.09479 | 31.24 |
| 2147   | 2017 | -0.2  | 0.04 | 0.992034 | 0.98413218 | 23.52265 | 0.188928 | 62.05 |
| 600567 | 2017 | -0.09 | 0.04 | 0.992034 | 0.98413218 | 24.01653 | 0.193411 | 28.08 |
| 600808 | 2017 | -0.75 | 0.04 | 0.992034 | 0.98413218 | 25.00259 | 0.186224 | 45.54 |
| 600808 | 2017 | -0.75 | 0.04 | 0.992034 | 0.98413218 | 25.00259 | 0.186224 | 45.54 |
| 2347   | 2017 | -0.22 | 0.04 | 0.992034 | 0.98413218 | 21.41461 | -0.09479 | 31.24 |
| 2057   | 2017 | -0.44 | 0.04 | 0.992034 | 0.98413218 | 21.22026 | 0.108703 | 23.09 |
| 2057   | 2017 | 0.351 | 0.04 | 0.992034 | 0.98413218 | 21.22026 | 0.108703 | 23.09 |
| 2057   | 2017 | 0.263 | 0.04 | 0.992034 | 0.98413218 | 21.01954 | 0.108703 | 23.09 |
| 2147   | 2017 | -0.67 | 0.04 | 0.992034 | 0.98413218 | 23.52265 | 0.188928 | 62.05 |
| 2147   | 2017 | -0.67 | 0.04 | 0.992034 | 0.98413218 | 23.52265 | 0.188928 | 62.05 |
| 600567 | 2017 | -0.4  | 0.04 | 0.992034 | 0.98413218 | 24.01653 | 0.193411 | 28.08 |
| 600375 | 2017 | -0.43 | 0.04 | 0.992034 | 0.98413218 | 23.08786 | 0.02308  | 10.89 |
| 2347   | 2017 | -0.13 | 0.04 | 0.992034 | 0.98413218 | 21.41461 | -0.09479 | 31.24 |
| 600567 | 2017 | -0.09 | 0.04 | 0.992034 | 0.98413218 | 24.01653 | 0.193411 | 28.08 |
| 600375 | 2017 | 0.067 | 0.04 | 0.992034 | 0.98413218 | 23.08786 | 0.02308  | 10.89 |
| 2147   | 2017 | -0.12 | 0.04 | 0.992034 | 0.98413218 | 23.52265 | 0.188928 | 62.05 |
| 600808 | 2017 | 0.228 | 0.04 | 0.992034 | 0.98413218 | 25.00259 | 0.186224 | 45.54 |
| 2057   | 2017 | -0.44 | 0.04 | 0.992034 | 0.98413218 | 21.22026 | 0.108703 | 23.09 |
| 600375 | 2017 | -0.43 | 0.04 | 0.992034 | 0.98413218 | 23.08786 | 0.02308  | 10.89 |
| 600808 | 2017 | 0.131 | 0.04 | 0.992034 | 0.98413218 | 25.00259 | 0.186224 | 45.54 |
| 600808 | 2017 | -0.31 | 0.04 | 0.992034 | 0.98413218 | 25.00259 | 0.186224 | 45.54 |
| 2347   | 2017 | 0.013 | 0.04 | 0.992034 | 0.98413218 | 21.41461 | -0.09479 | 31.24 |
| 2057   | 2017 | -0.44 | 0.04 | 0.992034 | 0.98413218 | 21.22026 | 0.108703 | 23.09 |
| 600808 | 2017 | -0.48 | 0.04 | 0.992034 | 0.98413218 | 25.00259 | 0.186224 | 45.54 |
| 600567 | 2017 | -0.09 | 0.04 | 0.992034 | 0.98413218 | 24.01653 | 0.193411 | 28.08 |
| 600375 | 2017 | 0.042 | 0.04 | 0.992034 | 0.98413218 | 23.08786 | 0.02308  | 10.89 |
| 600375 | 2017 | -0.43 | 0.04 | 0.992034 | 0.98413218 | 23.08786 | 0.02308  | 10.89 |
| 600808 | 2017 | -0.37 | 0.04 | 0.992034 | 0.98413218 | 25.00259 | 0.186224 | 45.54 |
| 600567 | 2017 | -0.09 | 0.04 | 0.992034 | 0.98413218 | 24.01653 | 0.193411 | 28.08 |
| 600808 | 2017 | -0.36 | 0.04 | 0.992034 | 0.98413218 | 25.00259 | 0.186224 | 45.54 |
| 2057   | 2017 | 0.263 | 0.04 | 0.992034 | 0.98413218 | 21.22026 | 0.108703 | 23.09 |
| 603567 | 2017 | 0.346 | 0.02 | 0.891632 | 0.79500687 | 22.65277 | 0.111815 | 67.83 |
| 603567 | 2017 | 0.56  | 0.02 | 0.891632 | 0.79500687 | 22.65277 | 0.111815 | 67.83 |
| 603567 | 2017 | 0.511 | 0.02 | 0.891632 | 0.79500687 | 22.65277 | 0.111815 | 67.83 |
| 603567 | 2017 | 0.431 | 0.02 | 0.891632 | 0.79500687 | 22.65277 | 0.111815 | 67.83 |
| 603567 | 2017 | 0.37  | 0.02 | 0.891632 | 0.79500687 | 22.65277 | 0.111815 | 67.83 |
| 603567 | 2017 | 0.511 | 0.02 | 0.891632 | 0.79500687 | 22.65277 | 0.111815 | 67.83 |
| 603567 | 2017 | 0.56  | 0.02 | 0.891632 | 0.79500687 | 22.45023 | 0.111815 | 67.83 |
| 600362 | 2017 | -0.72 | 0.03 | 0.208401 | 0.04343098 | 25.3028  | 0.034246 | 40.53 |
| 600362 | 2017 | -0.72 | 0.03 | 0.208401 | 0.04343098 | 25.3028  | 0.034246 | 40.53 |
| 600362 | 2017 | -0.08 | 0.03 | 0.208401 | 0.04343098 | 25.3028  | 0.034246 | 40.53 |
| 600362 | 2017 | -0.38 | 0.03 | 0.208401 | 0.04343098 | 25.3028  | 0.034246 | 40.53 |
| 300066 | 2017 | 0.004 | 0.03 | 0.208401 | 0.04343098 | 21.31359 | 0.05091  | 40.84 |
| 600362 | 2017 | -0.27 | 0.03 | 0.208401 | 0.04343098 | 25.3028  | 0.034246 | 40.53 |
| 300066 | 2017 | 0.019 | 0.03 | 0.208401 | 0.04343098 | 21.31359 | 0.05091  | 40.84 |

|        |      |       |      |          |            |          |          |       |
|--------|------|-------|------|----------|------------|----------|----------|-------|
| 600362 | 2017 | -0.72 | 0.03 | 0.208401 | 0.04343098 | 24.88071 | 0.034246 | 40.53 |
| 600362 | 2017 | -0.38 | 0.03 | 0.208401 | 0.04343098 | 25.3028  | 0.034246 | 40.53 |
| 300066 | 2017 | 0.004 | 0.03 | 0.208401 | 0.04343098 | 21.31359 | 0.05091  | 40.84 |
| 300066 | 2017 | 0.004 | 0.03 | 0.208401 | 0.04343098 | 21.31359 | 0.05091  | 40.84 |
| 300066 | 2017 | 0.032 | 0.03 | 0.208401 | 0.04343098 | 21.31359 | 0.05091  | 40.84 |
| 600362 | 2017 | -0.27 | 0.03 | 0.208401 | 0.04343098 | 25.3028  | 0.034246 | 40.53 |
| 600362 | 2017 | -0.38 | 0.03 | 0.208401 | 0.04343098 | 25.3028  | 0.034246 | 40.53 |
| 600362 | 2017 | -0.72 | 0.03 | 0.208401 | 0.04343098 | 25.3028  | 0.034246 | 40.53 |
| 600362 | 2017 | -0.38 | 0.03 | 0.208401 | 0.04343098 | 25.3028  | 0.034246 | 40.53 |
| 300066 | 2017 | 0.004 | 0.03 | 0.208401 | 0.04343098 | 21.20381 | 0.05091  | 40.84 |
| 300066 | 2017 | 0.032 | 0.03 | 0.208401 | 0.04343098 | 21.31359 | 0.05091  | 40.84 |
| 600362 | 2017 | -0.68 | 0.03 | 0.208401 | 0.04343098 | 25.3028  | 0.034246 | 40.53 |
| 952    | 2017 | 0.822 | 0.03 | 0.922993 | 0.85191612 | 21.21911 | 0.138592 | 16.57 |
| 952    | 2017 | 0.822 | 0.03 | 0.922993 | 0.85191612 | 21.21911 | 0.138592 | 16.57 |
| 952    | 2017 | 0.159 | 0.03 | 0.922993 | 0.85191612 | 21.21911 | 0.138592 | 16.57 |
| 952    | 2017 | -0.12 | 0.03 | 0.922993 | 0.85191612 | 21.21911 | 0.138592 | 16.57 |
| 952    | 2017 | -0.34 | 0.03 | 0.922993 | 0.85191612 | 21.21911 | 0.138592 | 16.57 |
| 952    | 2017 | -0.12 | 0.03 | 0.922993 | 0.85191612 | 21.17985 | 0.138592 | 16.57 |
| 952    | 2017 | -0.01 | 0.03 | 0.922993 | 0.85191612 | 21.21911 | 0.138592 | 16.57 |
| 2014   | 2017 | 0.822 | 0.04 | 0.297252 | 0.08835854 | 21.59927 | 0.117617 | 31.7  |
| 2014   | 2017 | 0.086 | 0.04 | 0.297252 | 0.08835854 | 21.43449 | 0.117617 | 31.7  |
| 2014   | 2017 | 0.822 | 0.04 | 0.297252 | 0.08835854 | 21.59927 | 0.117617 | 31.7  |
| 2014   | 2017 | -0.5  | 0.04 | 0.297252 | 0.08835854 | 21.59927 | 0.117617 | 31.7  |
| 2014   | 2017 | 0.822 | 0.04 | 0.297252 | 0.08835854 | 21.59927 | 0.117617 | 31.7  |
| 2014   | 2017 | 0.381 | 0.04 | 0.297252 | 0.08835854 | 21.59927 | 0.117617 | 31.7  |
| 2014   | 2017 | -0.24 | 0.04 | 0.297252 | 0.08835854 | 21.59927 | 0.117617 | 31.7  |
| 2014   | 2017 | -0.17 | 0.04 | 0.297252 | 0.08835854 | 21.59927 | 0.117617 | 31.7  |
| 603067 | 2017 | 0.074 | 0.03 | 0.925248 | 0.85608477 | 20.92743 | 0.089659 | 49.48 |
| 300276 | 2017 | -0.06 | 0.03 | 0.925248 | 0.85608477 | 22.22712 | 0.02624  | 31.22 |
| 300276 | 2017 | 0.06  | 0.03 | 0.925248 | 0.85608477 | 22.22712 | 0.02624  | 31.22 |
| 300276 | 2017 | -0.26 | 0.03 | 0.925248 | 0.85608477 | 22.00277 | 0.02624  | 31.22 |
| 600745 | 2017 | 0.769 | 0.03 | 0.925248 | 0.85608477 | 22.5735  | 0.091343 | 24.16 |
| 300276 | 2017 | -0.53 | 0.03 | 0.925248 | 0.85608477 | 22.22712 | 0.02624  | 31.22 |
| 600745 | 2017 | 0.858 | 0.03 | 0.925248 | 0.85608477 | 22.5735  | 0.091343 | 24.16 |
| 300276 | 2017 | -0.53 | 0.03 | 0.925248 | 0.85608477 | 22.22712 | 0.02624  | 31.22 |
| 600745 | 2017 | 0.729 | 0.03 | 0.925248 | 0.85608477 | 23.11344 | 0.091343 | 24.16 |
| 708    | 2017 | 0.702 | 0.03 | 0.925248 | 0.85608477 | 22.60711 | 0.098032 | 29.95 |
| 600745 | 2017 | 0.984 | 0.03 | 0.925248 | 0.85608477 | 23.11344 | 0.091343 | 24.16 |
| 708    | 2017 | 0.702 | 0.03 | 0.925248 | 0.85608477 | 22.60711 | 0.098032 | 29.95 |
| 708    | 2017 | 0.702 | 0.03 | 0.925248 | 0.85608477 | 22.60711 | 0.098032 | 29.95 |
| 300276 | 2017 | -0.06 | 0.03 | 0.925248 | 0.85608477 | 22.22712 | 0.02624  | 31.22 |
| 600745 | 2017 | 0.669 | 0.03 | 0.925248 | 0.85608477 | 22.5735  | 0.091343 | 24.16 |
| 300276 | 2017 | -0.09 | 0.03 | 0.925248 | 0.85608477 | 22.22712 | 0.02624  | 31.22 |
| 603067 | 2017 | 0.074 | 0.03 | 0.925248 | 0.85608477 | 20.9185  | 0.089659 | 49.48 |
| 300276 | 2017 | -0.53 | 0.03 | 0.925248 | 0.85608477 | 22.00277 | 0.02624  | 31.22 |
| 603067 | 2017 | 0.074 | 0.03 | 0.925248 | 0.85608477 | 20.92743 | 0.089659 | 49.48 |
| 300276 | 2017 | -0.09 | 0.03 | 0.925248 | 0.85608477 | 22.22712 | 0.02624  | 31.22 |
| 600745 | 2017 | 0.769 | 0.03 | 0.925248 | 0.85608477 | 23.11344 | 0.091343 | 24.16 |
| 600745 | 2017 | 0.32  | 0.03 | 0.925248 | 0.85608477 | 23.11344 | 0.091343 | 24.16 |
| 600745 | 2017 | 1.204 | 0.03 | 0.925248 | 0.85608477 | 23.11344 | 0.091343 | 24.16 |
| 2390   | 2017 | -0.94 | 0.01 | 0.693147 | 0.48045301 | 23.20441 | 0.049046 | 21.04 |
| 2390   | 2017 | 0.117 | 0.01 | 0.693147 | 0.48045301 | 23.20441 | 0.049046 | 21.04 |
| 2390   | 2017 | 0.117 | 0.01 | 0.693147 | 0.48045301 | 23.20441 | 0.049046 | 21.04 |
| 2390   | 2017 | 0.117 | 0.01 | 0.693147 | 0.48045301 | 22.79041 | 0.049046 | 21.04 |

|        |      |       |      |          |            |          |          |       |
|--------|------|-------|------|----------|------------|----------|----------|-------|
| 2390   | 2017 | -0.23 | 0.01 | 0.693147 | 0.48045301 | 23.20441 | 0.049046 | 21.04 |
| 2390   | 2017 | 0.117 | 0.01 | 0.693147 | 0.48045301 | 23.20441 | 0.049046 | 21.04 |
| 2390   | 2017 | -0.06 | 0.01 | 0.693147 | 0.48045301 | 23.20441 | 0.049046 | 21.04 |
| 2390   | 2017 | -0.45 | 0.01 | 0.693147 | 0.48045301 | 23.20441 | 0.049046 | 21.04 |
| 2390   | 2017 | -0.61 | 0.01 | 0.693147 | 0.48045301 | 23.20441 | 0.049046 | 21.04 |
| 600187 | 2017 | 0.367 | 0.02 | 1.399184 | 1.957715   | 22.24707 | 0.003961 | 13.74 |
| 600187 | 2017 | 0.367 | 0.02 | 1.399184 | 1.957715   | 22.24707 | 0.003961 | 13.74 |
| 601106 | 2017 | -0.06 | 0.02 | 1.399184 | 1.957715   | 24.23121 | 0.006921 | 63.88 |
| 601106 | 2017 | 0.075 | 0.02 | 1.399184 | 1.957715   | 24.23121 | 0.006921 | 63.88 |
| 600187 | 2017 | 0.367 | 0.02 | 1.399184 | 1.957715   | 22.24707 | 0.003961 | 13.74 |
| 601106 | 2017 | 0.605 | 0.02 | 1.399184 | 1.957715   | 24.23121 | 0.006921 | 63.88 |
| 601106 | 2017 | -0.06 | 0.02 | 1.399184 | 1.957715   | 24.23121 | 0.006921 | 63.88 |
| 600187 | 2017 | 0.367 | 0.02 | 1.399184 | 1.957715   | 22.24707 | 0.003961 | 13.74 |
| 601106 | 2017 | -0.15 | 0.02 | 1.399184 | 1.96E+00   | 24.23121 | 0.006921 | 63.88 |
| 600187 | 2017 | 0.367 | 0.02 | 1.399184 | 1.96E+00   | 22.11398 | 0.003961 | 13.74 |
| 601106 | 2017 | 0.09  | 0.02 | 1.399184 | 1.96E+00   | 24.23121 | 0.006921 | 63.88 |
| 601106 | 2017 | 0.09  | 0.02 | 1.399184 | 1.957715   | 24.23121 | 0.006921 | 63.88 |
| 601106 | 2017 | -0.28 | 0.02 | 1.399184 | 1.957715   | 24.23121 | 0.006921 | 63.88 |
| 601106 | 2017 | 0.605 | 0.02 | 1.399184 | 1.957715   | 24.23121 | 0.006921 | 63.88 |
| 601106 | 2017 | -0.04 | 0.02 | 1.399184 | 1.957715   | 24.23121 | 0.006921 | 63.88 |
| 601106 | 2017 | -0.49 | 0.02 | 1.399184 | 1.957715   | 24.23121 | 0.006921 | 63.88 |
| 601106 | 2017 | -0.19 | 0.02 | 1.399184 | 1.957715   | 24.21914 | 0.006921 | 63.88 |
| 600187 | 2017 | 0.367 | 0.02 | 1.399184 | 1.957715   | 22.24707 | 0.003961 | 13.74 |
| 601899 | 2017 | 0.364 | 0.03 | 0.739107 | 0.54627938 | 25.21544 | 0.086273 | 25.88 |
| 600388 | 2017 | 0.856 | 0.03 | 0.739107 | 0.54627938 | 23.17641 | 0.159395 | 17.17 |
| 600388 | 2017 | 0.298 | 0.03 | 0.739107 | 0.54627938 | 23.17641 | 0.159395 | 17.17 |
| 2740   | 2017 | -0.88 | 0.03 | 0.739107 | 0.54627938 | 21.67711 | 0.043545 | 23.58 |
| 601899 | 2017 | -0.96 | 0.03 | 0.739107 | 0.54627938 | 25.21544 | 0.086273 | 25.88 |
| 600388 | 2017 | 0.106 | 0.03 | 0.739107 | 0.54627938 | 23.17641 | 0.159395 | 17.17 |
| 600388 | 2017 | 0.177 | 0.03 | 0.739107 | 0.54627938 | 23.17641 | 0.159395 | 17.17 |
| 603686 | 2017 | -0.53 | 0.03 | 0.739107 | 0.54627938 | 22.07408 | 0.12088  | 20.06 |
| 601899 | 2017 | -0.39 | 0.03 | 0.739107 | 0.54627938 | 25.21544 | 0.086273 | 25.88 |
| 2740   | 2017 | -0.88 | 0.03 | 0.739107 | 0.54627938 | 21.67711 | 0.043545 | 23.58 |
| 2682   | 2017 | -0.54 | 0.03 | 0.739107 | 0.54627938 | 22.69237 | 0.064525 | 29.1  |
| 603686 | 2017 | -0.53 | 0.03 | 0.739107 | 0.54627938 | 22.0227  | 0.12088  | 20.06 |
| 600388 | 2017 | -0.06 | 0.03 | 0.739107 | 0.54627938 | 23.17641 | 0.159395 | 17.17 |
| 601899 | 2017 | -0.39 | 0.03 | 0.739107 | 0.54627938 | 25.21544 | 0.086273 | 25.88 |
| 601899 | 2017 | -0.49 | 0.03 | 0.739107 | 0.54627938 | 25.21544 | 0.086273 | 25.88 |
| 2682   | 2017 | -0.82 | 0.03 | 0.739107 | 0.54627938 | 22.69237 | 0.064525 | 29.1  |
| 2740   | 2017 | -0.88 | 0.03 | 0.739107 | 0.54627938 | 21.58342 | 0.043545 | 23.58 |
| 601899 | 2017 | -0.96 | 0.03 | 0.739107 | 0.54627938 | 25.21544 | 0.086273 | 25.88 |
| 601899 | 2017 | -0.96 | 0.03 | 0.739107 | 0.54627938 | 25.21544 | 0.086273 | 25.88 |
| 601899 | 2017 | -0.96 | 0.03 | 0.739107 | 0.54627938 | 25.21544 | 0.086273 | 25.88 |
| 600388 | 2017 | -0.17 | 0.03 | 0.739107 | 0.54627938 | 23.17641 | 0.159395 | 17.17 |
| 2740   | 2017 | -0.88 | 0.03 | 0.739107 | 0.54627938 | 21.67711 | 0.043545 | 23.58 |
| 600388 | 2017 | 0.183 | 0.03 | 0.739107 | 0.54627938 | 23.17641 | 0.159395 | 17.17 |
| 601899 | 2017 | -0.96 | 0.03 | 0.739107 | 0.54627938 | 25.21544 | 0.086273 | 25.88 |
| 600388 | 2017 | 0.934 | 0.03 | 0.739107 | 0.54627938 | 23.17641 | 0.159395 | 17.17 |
| 601899 | 2017 | -0.83 | 0.03 | 0.739107 | 0.54627938 | 25.21544 | 0.086273 | 25.88 |
| 601899 | 2017 | -0.39 | 0.03 | 0.739107 | 0.54627938 | 25.21544 | 0.086273 | 25.88 |
| 603686 | 2017 | -0.14 | 0.03 | 0.739107 | 0.54627938 | 22.07408 | 0.12088  | 20.06 |
| 600388 | 2017 | -0.39 | 0.03 | 0.739107 | 0.54627938 | 23.17641 | 0.159395 | 17.17 |
| 601899 | 2017 | -0.52 | 0.03 | 0.739107 | 0.54627938 | 25.21544 | 0.086273 | 25.88 |
| 601899 | 2017 | -0.52 | 0.03 | 0.739107 | 0.54627938 | 25.21544 | 0.086273 | 25.88 |

|        |      |       |      |          |            |          |          |       |
|--------|------|-------|------|----------|------------|----------|----------|-------|
| 601899 | 2017 | 0.099 | 0.03 | 0.739107 | 0.54627938 | 25.21544 | 0.086273 | 25.88 |
| 600388 | 2017 | -0.39 | 0.03 | 0.739107 | 0.54627938 | 23.17641 | 0.159395 | 17.17 |
| 600388 | 2017 | 0.167 | 0.03 | 0.739107 | 0.54627938 | 23.17641 | 0.159395 | 17.17 |
| 601899 | 2017 | -0.73 | 0.03 | 0.739107 | 0.54627938 | 25.21544 | 0.086273 | 25.88 |
| 600388 | 2017 | 0.272 | 0.03 | 0.739107 | 0.54627938 | 23.17641 | 0.159395 | 17.17 |
| 600388 | 2017 | 0.139 | 0.03 | 0.739107 | 0.54627938 | 23.17641 | 0.159395 | 17.17 |
| 601899 | 2017 | 0.199 | 0.03 | 0.739107 | 0.54627938 | 25.21544 | 0.086273 | 25.88 |
| 2682   | 2017 | -0.01 | 0.03 | 0.739107 | 0.54627938 | 22.69237 | 0.064525 | 29.1  |
| 600388 | 2017 | -0.39 | 0.03 | 0.739107 | 0.54627938 | 23.17641 | 0.159395 | 17.17 |
| 601899 | 2017 | 0.099 | 0.03 | 0.739107 | 0.54627938 | 24.80535 | 0.086273 | 25.88 |
| 601899 | 2017 | -0.51 | 0.03 | 0.739107 | 0.54627938 | 25.21544 | 0.086273 | 25.88 |
| 2740   | 2017 | -0.88 | 0.03 | 0.739107 | 0.54627938 | 21.67711 | 0.043545 | 23.58 |
| 600388 | 2017 | 0.272 | 0.03 | 0.739107 | 0.54627938 | 23.17641 | 0.159395 | 17.17 |
| 600388 | 2017 | -0.04 | 0.03 | 0.739107 | 0.54627938 | 23.40383 | 0.159395 | 17.17 |
| 2682   | 2017 | -0.95 | 0.03 | 0.739107 | 0.54627938 | 22.69237 | 0.064525 | 29.1  |
| 601899 | 2017 | -0.52 | 0.03 | 0.739107 | 0.54627938 | 25.21544 | 0.086273 | 25.88 |
| 2682   | 2017 | -0.01 | 0.03 | 0.739107 | 0.54627938 | 22.13957 | 0.064525 | 29.1  |
| 603686 | 2017 | -0.16 | 0.03 | 0.739107 | 0.54627938 | 22.07408 | 0.12088  | 20.06 |
| 601899 | 2017 | -0.96 | 0.03 | 0.739107 | 0.54627938 | 25.21544 | 0.086273 | 25.88 |
| 601899 | 2017 | -0.08 | 0.03 | 0.739107 | 0.54627938 | 25.21544 | 0.086273 | 25.88 |
| 2682   | 2017 | -0.01 | 0.03 | 0.739107 | 0.54627938 | 22.69237 | 0.064525 | 29.1  |
| 2682   | 2017 | -0.83 | 0.03 | 0.739107 | 0.54627938 | 22.69237 | 0.064525 | 29.1  |
| 600388 | 2017 | 0.167 | 0.03 | 0.739107 | 0.54627938 | 23.17641 | 0.159395 | 17.17 |
| 603686 | 2017 | -0.14 | 0.03 | 0.739107 | 0.54627938 | 22.07408 | 0.12088  | 20.06 |
| 600388 | 2017 | 0.192 | 0.03 | 0.739107 | 0.54627938 | 23.17641 | 0.159395 | 17.17 |
| 2682   | 2017 | -0.01 | 0.03 | 0.739107 | 0.54627938 | 22.69237 | 0.064525 | 29.1  |

| age | Debt     | ind | indg |
|-----|----------|-----|------|
| 4   | 0.380015 | C   | 1    |
| 4   | 0.380015 | C   | 1    |
| 4   | 0.380015 | C   | 1    |
| 4   | 0.380015 | C   | 1    |
| 4   | 0.380015 | C   | 1    |
| 4   | 0.380015 | C   | 1    |
| 4   | 0.380015 | C   | 1    |
| 4   | 0.380015 | C   | 1    |
| 4   | 0.337938 | C   | 1    |
| 4   | 0.337938 | C   | 1    |
| 4   | 0.337938 | C   | 1    |
| 12  | 0.446339 | B   | 1    |
| 3   | 0.456722 | C   | 1    |
| 3   | 0.456722 | C   | 1    |
| 3   | 0.456722 | C   | 1    |
| 12  | 0.446339 | B   | 1    |
| 3   | 0.456722 | C   | 1    |
| 3   | 0.456722 | C   | 1    |
| 3   | 0.456722 | C   | 1    |
| 12  | 0.446339 | B   | 1    |
| 3   | 0.456722 | C   | 1    |
| 3   | 0.456722 | C   | 1    |
| 3   | 0.456722 | C   | 1    |
| 12  | 0.446339 | B   | 1    |
| 12  | 0.446339 | B   | 1    |
| 3   | 0.456722 | C   | 1    |
| 3   | 0.456722 | C   | 1    |
| 18  | 0.42441  | C   | 1    |
| 18  | 0.42441  | C   | 1    |
| 13  | 0.414395 | R   | 0    |
| 18  | 0.42441  | C   | 1    |
| 13  | 0.414395 | R   | 0    |
| 18  | 0.42441  | C   | 1    |
| 18  | 0.42441  | C   | 1    |
| 18  | 0.42441  | C   | 1    |
| 13  | 0.414395 | R   | 0    |
| 13  | 0.414395 | R   | 0    |
| 13  | 0.414395 | R   | 0    |
| 18  | 0.42441  | C   | 1    |
| 1   | 0.306581 | C   | 1    |
| 5   | 0.431855 | C   | 1    |
| 17  | 0.457634 | C   | 1    |
| 5   | 0.197284 | C   | 1    |
| 4   | 0.303185 | C   | 1    |
| 17  | 0.457634 | C   | 1    |
| 4   | 0.303185 | C   | 1    |
| 3   | 0.270091 | C   | 1    |
| 17  | 0.457634 | C   | 1    |
| 5   | 0.431855 | C   | 1    |
| 4   | 0.239161 | I   | 0    |
| 17  | 0.457634 | C   | 1    |
| 4   | 0.303185 | C   | 1    |
| 1   | 0.735843 | N   | 0    |
| 1   | 0.695091 | C   | 1    |

|    |          |   |   |
|----|----------|---|---|
| 5  | 0.197284 | C | 1 |
| 5  | 0.431855 | C | 1 |
| 5  | 0.197284 | C | 1 |
| 3  | 0.270091 | C | 1 |
| 5  | 0.431855 | C | 1 |
| 6  | 0.367266 | C | 1 |
| 1  | 0.306581 | C | 1 |
| 1  | 0.695091 | C | 1 |
| 1  | 0.735843 | N | 0 |
| 5  | 0.431855 | C | 1 |
| 5  | 0.197284 | C | 1 |
| 5  | 0.431855 | C | 1 |
| 4  | 0.399737 | C | 1 |
| 5  | 0.431855 | C | 1 |
| 1  | 0.695091 | C | 1 |
| 4  | 0.303185 | C | 1 |
| 1  | 0.695091 | C | 1 |
| 4  | 0.399737 | C | 1 |
| 4  | 0.399737 | C | 1 |
| 6  | 0.367266 | C | 1 |
| 4  | 0.239161 | I | 0 |
| 5  | 0.431855 | C | 1 |
| 1  | 0.695091 | C | 1 |
| 6  | 0.367266 | C | 1 |
| 5  | 0.431855 | C | 1 |
| 6  | 0.367266 | C | 1 |
| 3  | 0.270091 | C | 1 |
| 6  | 0.367266 | C | 1 |
| 17 | 0.457634 | C | 1 |
| 6  | 0.367266 | C | 1 |
| 4  | 0.303185 | C | 1 |
| 4  | 0.303185 | C | 1 |
| 5  | 0.431855 | C | 1 |
| 1  | 0.695091 | C | 1 |
| 4  | 0.399737 | C | 1 |
| 17 | 0.457634 | C | 1 |
| 1  | 0.735843 | N | 0 |
| 5  | 0.431855 | C | 1 |
| 17 | 0.457634 | C | 1 |
| 1  | 0.306581 | C | 1 |
| 4  | 0.399737 | C | 1 |
| 5  | 0.431855 | C | 1 |
| 4  | 0.303185 | C | 1 |
| 3  | 0.270091 | C | 1 |
| 1  | 0.735843 | N | 0 |
| 4  | 0.399737 | C | 1 |
| 5  | 0.431855 | C | 1 |
| 1  | 0.306581 | C | 1 |
| 5  | 0.431855 | C | 1 |
| 6  | 0.367266 | C | 1 |
| 5  | 0.431855 | C | 1 |
| 4  | 0.399737 | C | 1 |
| 1  | 0.306581 | C | 1 |
| 5  | 0.197284 | C | 1 |



|    |          |   |   |
|----|----------|---|---|
| 1  | 0.306581 | C | 1 |
| 17 | 0.457634 | C | 1 |
| 17 | 0.457634 | C | 1 |
| 5  | 0.197284 | C | 1 |
| 1  | 0.306581 | C | 1 |
| 1  | 0.735843 | N | 0 |
| 3  | 0.270091 | C | 1 |
| 4  | 0.239161 | I | 0 |
| 1  | 0.735843 | N | 0 |
| 1  | 0.695091 | C | 1 |
| 1  | 0.306581 | C | 1 |
| 4  | 0.303185 | C | 1 |
| 4  | 0.399737 | C | 1 |
| 3  | 0.270091 | C | 1 |
| 5  | 0.197284 | C | 1 |
| 3  | 0.262451 | C | 1 |
| 3  | 0.262451 | C | 1 |
| 15 | 0.591402 | C | 1 |
| 15 | 0.591402 | C | 1 |
| 5  | 0.288901 | C | 1 |
| 11 | 0.565006 | I | 0 |
| 15 | 0.591402 | C | 1 |
| 3  | 0.262451 | C | 1 |
| 15 | 0.591402 | C | 1 |
| 11 | 0.565006 | I | 0 |
| 3  | 0.262451 | C | 1 |
| 5  | 0.288901 | C | 1 |
| 11 | 0.565006 | I | 0 |
| 11 | 0.565006 | I | 0 |
| 5  | 0.288901 | C | 1 |
| 15 | 0.591402 | C | 1 |
| 5  | 0.288901 | C | 1 |
| 11 | 0.565006 | I | 0 |
| 5  | 0.288901 | C | 1 |
| 3  | 0.262451 | C | 1 |
| 15 | 0.591402 | C | 1 |
| 11 | 0.565006 | I | 0 |
| 3  | 0.262451 | C | 1 |
| 15 | 0.591402 | C | 1 |
| 3  | 0.262451 | C | 1 |
| 15 | 0.591402 | C | 1 |
| 3  | 0.262451 | C | 1 |
| 15 | 0.591402 | C | 1 |
| 11 | 0.565006 | I | 0 |
| 15 | 0.591402 | C | 1 |
| 7  | 0.49405  | C | 1 |
| 20 | 0.38127  | C | 1 |
| 1  | 0.163854 | C | 1 |
| 5  | 0.464388 | C | 1 |
| 7  | 0.49405  | C | 1 |
| 4  | 0.441756 | C | 1 |
| 5  | 0.464388 | C | 1 |
| 5  | 0.464388 | C | 1 |
| 11 | 0.434118 | C | 1 |

|    |          |   |   |
|----|----------|---|---|
| 1  | 0.148585 | I | 0 |
| 7  | 0.49405  | C | 1 |
| 1  | 0.163854 | C | 1 |
| 4  | 0.441756 | C | 1 |
| 11 | 0.434118 | C | 1 |
| 7  | 0.49405  | C | 1 |
| 5  | 0.464388 | C | 1 |
| 7  | 0.49405  | C | 1 |
| 7  | 0.49405  | C | 1 |
| 20 | 0.38127  | C | 1 |
| 20 | 0.38127  | C | 1 |
| 7  | 0.49405  | C | 1 |
| 11 | 0.434118 | C | 1 |
| 11 | 0.434118 | C | 1 |
| 4  | 0.441756 | C | 1 |
| 7  | 0.49405  | C | 1 |
| 20 | 0.38127  | C | 1 |
| 3  | 0.584884 | C | 1 |
| 20 | 0.38127  | C | 1 |
| 3  | 0.584884 | C | 1 |
| 3  | 0.584884 | C | 1 |
| 11 | 0.434118 | C | 1 |
| 7  | 0.49405  | C | 1 |
| 20 | 0.38127  | C | 1 |
| 7  | 0.49405  | C | 1 |
| 5  | 0.464388 | C | 1 |
| 5  | 0.464388 | C | 1 |
| 4  | 0.441756 | C | 1 |
| 20 | 0.38127  | C | 1 |
| 4  | 0.441756 | C | 1 |
| 1  | 0.148585 | I | 0 |
| 1  | 0.163854 | C | 1 |
| 11 | 0.434118 | C | 1 |
| 11 | 0.434118 | C | 1 |
| 7  | 0.49405  | C | 1 |
| 3  | 0.584884 | C | 1 |
| 3  | 0.584884 | C | 1 |
| 1  | 0.148585 | I | 0 |
| 7  | 0.49405  | C | 1 |
| 11 | 0.434118 | C | 1 |
| 7  | 0.49405  | C | 1 |
| 20 | 0.38127  | C | 1 |
| 7  | 0.49405  | C | 1 |
| 11 | 0.434118 | C | 1 |
| 7  | 0.49405  | C | 1 |
| 16 | 0.192871 | C | 1 |
| 16 | 0.192871 | C | 1 |
| 4  | 0.393744 | C | 1 |
| 16 | 0.192871 | C | 1 |
| 4  | 0.393744 | C | 1 |
| 4  | 0.393744 | C | 1 |
| 5  | 0.308398 | C | 1 |
| 5  | 0.308398 | C | 1 |
| 4  | 0.393744 | C | 1 |

|    |          |   |   |
|----|----------|---|---|
| 16 | 0.192871 | C | 1 |
| 4  | 0.393744 | C | 1 |
| 5  | 0.308398 | C | 1 |
| 5  | 0.308398 | C | 1 |
| 4  | 0.393744 | C | 1 |
| 16 | 0.192871 | C | 1 |
| 16 | 0.192871 | C | 1 |
| 5  | 0.308398 | C | 1 |
| 5  | 0.308398 | C | 1 |
| 5  | 0.308398 | C | 1 |
| 5  | 0.308398 | C | 1 |
| 16 | 0.192871 | C | 1 |
| 16 | 0.192871 | C | 1 |
| 4  | 0.393744 | C | 1 |
| 5  | 0.308398 | C | 1 |
| 4  | 0.393744 | C | 1 |
| 4  | 0.393744 | C | 1 |
| 4  | 0.393744 | C | 1 |
| 4  | 0.393744 | C | 1 |
| 4  | 0.393744 | C | 1 |
| 4  | 0.393744 | C | 1 |
| 5  | 0.252624 | C | 1 |
| 5  | 0.252624 | C | 1 |
| 5  | 0.252624 | C | 1 |
| 5  | 0.252624 | C | 1 |
| 5  | 0.252624 | C | 1 |
| 5  | 0.252624 | C | 1 |
| 5  | 0.252624 | C | 1 |
| 5  | 0.252624 | C | 1 |
| 15 | 0.749556 | C | 1 |
| 15 | 0.749556 | C | 1 |
| 15 | 0.749556 | C | 1 |
| 15 | 0.749556 | C | 1 |
| 15 | 0.749556 | C | 1 |
| 15 | 0.749556 | C | 1 |
| 15 | 0.749556 | C | 1 |
| 15 | 0.749556 | C | 1 |
| 15 | 0.749556 | C | 1 |
| 15 | 0.749556 | C | 1 |
| 4  | 0.403472 | C | 1 |
| 4  | 0.403472 | C | 1 |
| 4  | 0.403472 | C | 1 |
| 4  | 0.403472 | C | 1 |
| 4  | 0.403472 | C | 1 |
| 9  | 0.676864 | C | 1 |
| 15 | 0.366101 | F | 0 |
| 9  | 0.373178 | C | 1 |
| 15 | 0.689282 | B | 1 |
| 19 | 0.636635 | C | 1 |
| 6  | 0.799053 | E | 1 |
| 8  | 0.669207 | C | 1 |
| 7  | 0.428097 | C | 1 |
| 8  | 0.669207 | C | 1 |
| 4  | 0.249198 | C | 1 |
| 7  | 0.428097 | C | 1 |
| 7  | 0.428097 | C | 1 |

|               |   |
|---------------|---|
| 6 0.651992 C  | 1 |
| 15 0.689282 B | 1 |
| 15 0.689282 B | 1 |
| 16 0.637895 C | 1 |
| 9 0.373178 C  | 1 |
| 8 0.669207 C  | 1 |
| 8 0.669207 C  | 1 |
| 19 0.636635 C | 1 |
| 16 0.637895 C | 1 |
| 16 0.637895 C | 1 |
| 15 0.689282 B | 1 |
| 9 0.676864 C  | 1 |
| 4 0.249198 C  | 1 |
| 16 0.637895 C | 1 |
| 19 0.636635 C | 1 |
| 15 0.366101 F | 0 |
| 6 0.651992 C  | 1 |
| 16 0.637895 C | 1 |
| 6 0.651992 C  | 1 |
| 9 0.676864 C  | 1 |
| 9 0.676864 C  | 1 |
| 6 0.651992 C  | 1 |
| 8 0.669207 C  | 1 |
| 15 0.689282 B | 1 |
| 9 0.676864 C  | 1 |
| 16 0.637895 C | 1 |
| 9 0.676864 C  | 1 |
| 8 0.669207 C  | 1 |
| 4 0.249198 C  | 1 |
| 15 0.689282 B | 1 |
| 6 0.799053 E  | 1 |
| 6 0.651992 C  | 1 |
| 6 0.651992 C  | 1 |
| 7 0.428097 C  | 1 |
| 8 0.669207 C  | 1 |
| 7 0.428097 C  | 1 |
| 9 0.373178 C  | 1 |
| 15 0.366101 F | 0 |
| 16 0.637895 C | 1 |
| 8 0.669207 C  | 1 |
| 15 0.366101 F | 0 |
| 8 0.669207 C  | 1 |
| 7 0.428097 C  | 1 |
| 15 0.366101 F | 0 |
| 8 0.669207 C  | 1 |
| 19 0.636635 C | 1 |
| 6 0.799053 E  | 1 |
| 6 0.799053 E  | 1 |
| 9 0.676864 C  | 1 |
| 6 0.651992 C  | 1 |
| 8 0.669207 C  | 1 |
| 7 0.428097 C  | 1 |
| 9 0.676864 C  | 1 |
| 6 0.651992 C  | 1 |

|    |          |   |   |
|----|----------|---|---|
| 8  | 0.669207 | C | 1 |
| 19 | 0.636635 | C | 1 |
| 9  | 0.676864 | C | 1 |
| 6  | 0.651992 | C | 1 |
| 15 | 0.366101 | F | 0 |
| 9  | 0.373178 | C | 1 |
| 6  | 0.651992 | C | 1 |
| 9  | 0.676864 | C | 1 |
| 6  | 0.651992 | C | 1 |
| 7  | 0.428097 | C | 1 |
| 4  | 0.249198 | C | 1 |
| 19 | 0.636635 | C | 1 |
| 9  | 0.373178 | C | 1 |
| 6  | 0.799053 | E | 1 |
| 4  | 0.249198 | C | 1 |
| 7  | 0.428097 | C | 1 |
| 7  | 0.428097 | C | 1 |
| 6  | 0.651992 | C | 1 |
| 6  | 0.799053 | E | 1 |
| 6  | 0.651992 | C | 1 |
| 9  | 0.676864 | C | 1 |
| 3  | 0.157905 | C | 1 |
| 3  | 0.157905 | C | 1 |
| 3  | 0.157905 | C | 1 |
| 3  | 0.157905 | C | 1 |
| 3  | 0.157905 | C | 1 |
| 19 | 0.327075 | C | 1 |
| 19 | 0.327075 | C | 1 |
| 19 | 0.327075 | C | 1 |
| 19 | 0.327075 | C | 1 |
| 19 | 0.327075 | C | 1 |
| 19 | 0.580846 | C | 1 |
| 19 | 0.580846 | C | 1 |
| 19 | 0.580846 | C | 1 |
| 16 | 0.686989 | C | 1 |
| 3  | 0.254968 | G | 0 |
| 9  | 0.299025 | C | 1 |
| 6  | 0.160301 | C | 1 |
| 3  | 0.254968 | G | 0 |
| 4  | 0.230638 | C | 1 |
| 3  | 0.336103 | C | 1 |
| 6  | 0.160301 | C | 1 |
| 15 | 0.519717 | C | 1 |
| 1  | 0.487302 | C | 1 |
| 1  | 0.487302 | C | 1 |
| 6  | 0.160301 | C | 1 |
| 9  | 0.20925  | C | 1 |
| 4  | 0.230638 | C | 1 |
| 4  | 0.561926 | C | 1 |
| 13 | 0.478926 | C | 1 |
| 2  | 0.565113 | C | 1 |
| 2  | 0.565113 | C | 1 |
| 3  | 0.174488 | C | 1 |
| 9  | 0.299025 | C | 1 |

|    |          |   |   |
|----|----------|---|---|
| 15 | 0.602416 | D | 1 |
| 15 | 0.369212 | N | 0 |
| 6  | 0.160301 | C | 1 |
| 9  | 0.20925  | C | 1 |
| 13 | 0.478926 | C | 1 |
| 6  | 0.160301 | C | 1 |
| 2  | 0.565113 | C | 1 |
| 9  | 0.20925  | C | 1 |
| 3  | 0.336103 | C | 1 |
| 16 | 0.686989 | C | 1 |
| 16 | 0.686989 | C | 1 |
| 2  | 0.565113 | C | 1 |
| 16 | 0.686989 | C | 1 |
| 4  | 0.230638 | C | 1 |
| 2  | 0.565113 | C | 1 |
| 16 | 0.686989 | C | 1 |
| 2  | 0.565113 | C | 1 |
| 4  | 0.230638 | C | 1 |
| 9  | 0.299025 | C | 1 |
| 4  | 0.337139 | C | 1 |
| 15 | 0.369212 | N | 0 |
| 1  | 0.487302 | C | 1 |
| 2  | 0.565113 | C | 1 |
| 2  | 0.565113 | C | 1 |
| 2  | 0.565113 | C | 1 |
| 1  | 0.2389   | C | 1 |
| 9  | 0.20925  | C | 1 |
| 9  | 0.20925  | C | 1 |
| 9  | 0.20925  | C | 1 |
| 9  | 0.20925  | C | 1 |
| 2  | 0.565113 | C | 1 |
| 2  | 0.565113 | C | 1 |
| 4  | 0.561926 | C | 1 |
| 4  | 0.230638 | C | 1 |
| 15 | 0.519717 | C | 1 |
| 9  | 0.20925  | C | 1 |
| 7  | 0.616076 | C | 1 |
| 15 | 0.519717 | C | 1 |
| 9  | 0.20925  | C | 1 |
| 9  | 0.20925  | C | 1 |
| 15 | 0.519717 | C | 1 |
| 16 | 0.686989 | C | 1 |
| 6  | 0.398014 | C | 1 |
| 2  | 0.565113 | C | 1 |
| 1  | 0.487302 | C | 1 |
| 5  | 0.32946  | C | 1 |
| 13 | 0.478926 | C | 1 |
| 4  | 0.230638 | C | 1 |
| 7  | 0.616076 | C | 1 |
| 7  | 0.616076 | C | 1 |
| 4  | 0.337139 | C | 1 |
| 4  | 0.337139 | C | 1 |
| 15 | 0.369212 | N | 0 |
| 2  | 0.565113 | C | 1 |

|    |          |   |   |
|----|----------|---|---|
| 21 | 0.49158  | C | 1 |
| 2  | 0.565113 | C | 1 |
| 15 | 0.519717 | C | 1 |
| 5  | 0.216064 | C | 1 |
| 2  | 0.565113 | C | 1 |
| 2  | 0.565113 | C | 1 |
| 2  | 0.565113 | C | 1 |
| 16 | 0.686989 | C | 1 |
| 13 | 0.478926 | C | 1 |
| 15 | 0.602416 | D | 1 |
| 16 | 0.686989 | C | 1 |
| 2  | 0.565113 | C | 1 |
| 21 | 0.49158  | C | 1 |
| 15 | 0.519717 | C | 1 |
| 15 | 0.519717 | C | 1 |
| 6  | 0.160301 | C | 1 |
| 5  | 0.216064 | C | 1 |
| 6  | 0.1866   | C | 1 |
| 1  | 0.2389   | C | 1 |
| 15 | 0.369212 | N | 0 |
| 16 | 0.686989 | C | 1 |
| 6  | 0.160301 | C | 1 |
| 2  | 0.565113 | C | 1 |
| 2  | 0.565113 | C | 1 |
| 13 | 0.478926 | C | 1 |
| 4  | 0.337139 | C | 1 |
| 13 | 0.478926 | C | 1 |
| 5  | 0.216064 | C | 1 |
| 9  | 0.299025 | C | 1 |
| 4  | 0.230638 | C | 1 |
| 1  | 0.487302 | C | 1 |
| 3  | 0.174488 | C | 1 |
| 16 | 0.686989 | C | 1 |
| 13 | 0.478926 | C | 1 |
| 22 | 0.163774 | C | 1 |
| 15 | 0.519717 | C | 1 |
| 22 | 0.163774 | C | 1 |
| 15 | 0.519717 | C | 1 |
| 15 | 0.369212 | N | 0 |
| 2  | 0.565113 | C | 1 |
| 13 | 0.478926 | C | 1 |
| 5  | 0.216064 | C | 1 |
| 1  | 0.2389   | C | 1 |
| 7  | 0.616076 | C | 1 |
| 2  | 0.565113 | C | 1 |
| 3  | 0.174488 | C | 1 |
| 13 | 0.478926 | C | 1 |
| 1  | 0.2389   | C | 1 |
| 2  | 0.565113 | C | 1 |
| 2  | 0.565113 | C | 1 |
| 2  | 0.565113 | C | 1 |
| 21 | 0.49158  | C | 1 |
| 2  | 0.565113 | C | 1 |
| 2  | 0.565113 | C | 1 |

|    |          |   |   |
|----|----------|---|---|
| 3  | 0.336103 | C | 1 |
| 2  | 0.565113 | C | 1 |
| 15 | 0.369212 | N | 0 |
| 13 | 0.478926 | C | 1 |
| 16 | 0.686989 | C | 1 |
| 2  | 0.565113 | C | 1 |
| 2  | 0.565113 | C | 1 |
| 9  | 0.299025 | C | 1 |
| 15 | 0.369212 | N | 0 |
| 2  | 0.565113 | C | 1 |
| 4  | 0.561926 | C | 1 |
| 2  | 0.565113 | C | 1 |
| 1  | 0.2389   | C | 1 |
| 3  | 0.336103 | C | 1 |
| 9  | 0.20925  | C | 1 |
| 4  | 0.337139 | C | 1 |
| 3  | 0.336103 | C | 1 |
| 21 | 0.49158  | C | 1 |
| 6  | 0.160301 | C | 1 |
| 4  | 0.561926 | C | 1 |
| 2  | 0.565113 | C | 1 |
| 13 | 0.478926 | C | 1 |
| 9  | 0.20925  | C | 1 |
| 16 | 0.686989 | C | 1 |
| 1  | 0.2389   | C | 1 |
| 3  | 0.254968 | G | 0 |
| 2  | 0.565113 | C | 1 |
| 5  | 0.216064 | C | 1 |
| 2  | 0.565113 | C | 1 |
| 16 | 0.686989 | C | 1 |
| 15 | 0.369212 | N | 0 |
| 6  | 0.1866   | C | 1 |
| 21 | 0.49158  | C | 1 |
| 2  | 0.565113 | C | 1 |
| 2  | 0.565113 | C | 1 |
| 22 | 0.163774 | C | 1 |
| 6  | 0.1866   | C | 1 |
| 22 | 0.163774 | C | 1 |
| 3  | 0.336103 | C | 1 |
| 13 | 0.478926 | C | 1 |
| 9  | 0.299025 | C | 1 |
| 6  | 0.1866   | C | 1 |
| 3  | 0.254968 | G | 0 |
| 1  | 0.487302 | C | 1 |
| 6  | 0.1866   | C | 1 |
| 15 | 0.369212 | N | 0 |
| 3  | 0.174488 | C | 1 |
| 9  | 0.299025 | C | 1 |
| 6  | 0.1866   | C | 1 |
| 2  | 0.565113 | C | 1 |
| 13 | 0.478926 | C | 1 |
| 15 | 0.519717 | C | 1 |
| 9  | 0.20925  | C | 1 |
| 16 | 0.686989 | C | 1 |



|    |          |   |   |
|----|----------|---|---|
| 5  | 0.216064 | C | 1 |
| 7  | 0.616076 | C | 1 |
| 3  | 0.174488 | C | 1 |
| 13 | 0.478926 | C | 1 |
| 4  | 0.230638 | C | 1 |
| 6  | 0.398014 | C | 1 |
| 16 | 0.686989 | C | 1 |
| 2  | 0.565113 | C | 1 |
| 13 | 0.478926 | C | 1 |
| 9  | 0.20925  | C | 1 |
| 3  | 0.174488 | C | 1 |
| 2  | 0.565113 | C | 1 |
| 1  | 0.487302 | C | 1 |
| 4  | 0.561926 | C | 1 |
| 15 | 0.602416 | D | 1 |
| 6  | 0.1866   | C | 1 |
| 3  | 0.254968 | G | 0 |
| 3  | 0.254968 | G | 0 |
| 15 | 0.369212 | N | 0 |
| 1  | 0.487302 | C | 1 |
| 13 | 0.478926 | C | 1 |
| 2  | 0.565113 | C | 1 |
| 6  | 0.398014 | C | 1 |
| 2  | 0.565113 | C | 1 |
| 2  | 0.565113 | C | 1 |
| 5  | 0.32946  | C | 1 |
| 5  | 0.32946  | C | 1 |
| 5  | 0.32946  | C | 1 |
| 5  | 0.216064 | C | 1 |
| 5  | 0.32946  | C | 1 |
| 6  | 0.1866   | C | 1 |
| 2  | 0.565113 | C | 1 |
| 15 | 0.602416 | D | 1 |
| 2  | 0.565113 | C | 1 |
| 7  | 0.616076 | C | 1 |
| 13 | 0.478926 | C | 1 |
| 16 | 0.686989 | C | 1 |
| 15 | 0.519717 | C | 1 |
| 9  | 0.20925  | C | 1 |
| 4  | 0.337139 | C | 1 |
| 16 | 0.686989 | C | 1 |
| 6  | 0.398014 | C | 1 |
| 2  | 0.565113 | C | 1 |
| 4  | 0.230638 | C | 1 |
| 3  | 0.336103 | C | 1 |
| 21 | 0.49158  | C | 1 |
| 2  | 0.565113 | C | 1 |
| 2  | 0.565113 | C | 1 |
| 13 | 0.478926 | C | 1 |
| 2  | 0.565113 | C | 1 |
| 1  | 0.2389   | C | 1 |
| 16 | 0.686989 | C | 1 |
| 2  | 0.565113 | C | 1 |
| 3  | 0.336103 | C | 1 |

|    |          |   |   |
|----|----------|---|---|
| 15 | 0.519717 | C | 1 |
| 6  | 0.160301 | C | 1 |
| 3  | 0.336103 | C | 1 |
| 4  | 0.561926 | C | 1 |
| 13 | 0.478926 | C | 1 |
| 3  | 0.336103 | C | 1 |
| 3  | 0.174488 | C | 1 |
| 16 | 0.686989 | C | 1 |
| 15 | 0.519717 | C | 1 |
| 13 | 0.478926 | C | 1 |
| 2  | 0.565113 | C | 1 |
| 4  | 0.337139 | C | 1 |
| 2  | 0.565113 | C | 1 |
| 1  | 0.487302 | C | 1 |
| 4  | 0.337139 | C | 1 |
| 21 | 0.49158  | C | 1 |
| 4  | 0.561926 | C | 1 |
| 6  | 0.398014 | C | 1 |
| 4  | 0.337139 | C | 1 |
| 4  | 0.230638 | C | 1 |
| 22 | 0.163774 | C | 1 |
| 16 | 0.686989 | C | 1 |
| 15 | 0.602416 | D | 1 |
| 9  | 0.299025 | C | 1 |
| 3  | 0.174488 | C | 1 |
| 15 | 0.602416 | D | 1 |
| 16 | 0.424114 | C | 1 |
| 16 | 0.424114 | C | 1 |
| 16 | 0.424114 | C | 1 |
| 16 | 0.424114 | C | 1 |
| 11 | 0.495424 | C | 1 |
| 14 | 0.923242 | C | 1 |
| 14 | 0.923242 | C | 1 |
| 5  | 0.47711  | N | 0 |
| 12 | 0.509348 | C | 1 |
| 18 | 0.566617 | C | 1 |
| 17 | 0.150539 | C | 1 |
| 18 | 0.566617 | C | 1 |
| 17 | 0.150539 | C | 1 |
| 4  | 0.466186 | C | 1 |
| 14 | 0.923242 | C | 1 |
| 12 | 0.509348 | C | 1 |
| 5  | 0.47711  | N | 0 |
| 4  | 0.466186 | C | 1 |
| 12 | 0.509348 | C | 1 |
| 5  | 0.47711  | N | 0 |
| 5  | 0.47711  | N | 0 |
| 5  | 0.47711  | N | 0 |
| 14 | 0.923242 | C | 1 |
| 12 | 0.509348 | C | 1 |
| 12 | 0.509348 | C | 1 |
| 12 | 0.509348 | C | 1 |
| 14 | 0.923242 | C | 1 |
| 4  | 0.466186 | C | 1 |

|    |          |   |   |
|----|----------|---|---|
| 14 | 0.923242 | C | 1 |
| 14 | 0.923242 | C | 1 |
| 5  | 0.47711  | N | 0 |
| 12 | 0.509348 | C | 1 |
| 12 | 0.509348 | C | 1 |
| 4  | 0.466186 | C | 1 |
| 17 | 0.150539 | C | 1 |
| 5  | 0.47711  | N | 0 |
| 12 | 0.509348 | C | 1 |
| 14 | 0.923242 | C | 1 |
| 11 | 0.495424 | C | 1 |
| 5  | 0.379184 | C | 1 |
| 12 | 0.509348 | C | 1 |
| 11 | 0.495424 | C | 1 |
| 14 | 0.923242 | C | 1 |
| 12 | 0.509348 | C | 1 |
| 12 | 0.509348 | C | 1 |
| 18 | 0.566617 | C | 1 |
| 5  | 0.379184 | C | 1 |
| 11 | 0.495424 | C | 1 |
| 14 | 0.923242 | C | 1 |
| 5  | 0.47711  | N | 0 |
| 12 | 0.509348 | C | 1 |
| 18 | 0.566617 | C | 1 |
| 18 | 0.566617 | C | 1 |
| 18 | 0.566617 | C | 1 |
| 12 | 0.509348 | C | 1 |
| 12 | 0.509348 | C | 1 |
| 12 | 0.509348 | C | 1 |
| 18 | 0.566617 | C | 1 |
| 12 | 0.509348 | C | 1 |
| 14 | 0.923242 | C | 1 |
| 12 | 0.509348 | C | 1 |
| 12 | 0.509348 | C | 1 |
| 4  | 0.466186 | C | 1 |
| 12 | 0.509348 | C | 1 |
| 12 | 0.509348 | C | 1 |
| 12 | 0.509348 | C | 1 |
| 11 | 0.495424 | C | 1 |
| 4  | 0.466186 | C | 1 |
| 11 | 0.495424 | C | 1 |
| 4  | 0.466186 | C | 1 |
| 4  | 0.466186 | C | 1 |
| 5  | 0.379184 | C | 1 |
| 17 | 0.150539 | C | 1 |
| 5  | 0.47711  | N | 0 |
| 11 | 0.495424 | C | 1 |
| 17 | 0.150539 | C | 1 |
| 5  | 0.379184 | C | 1 |
| 14 | 0.923242 | C | 1 |
| 12 | 0.509348 | C | 1 |
| 12 | 0.509348 | C | 1 |
| 14 | 0.923242 | C | 1 |
| 12 | 0.509348 | C | 1 |

|    |          |   |   |
|----|----------|---|---|
| 12 | 0.509348 | C | 1 |
| 5  | 0.379184 | C | 1 |
| 11 | 0.495424 | C | 1 |
| 17 | 0.150539 | C | 1 |
| 4  | 0.466186 | C | 1 |
| 12 | 0.509348 | C | 1 |
| 14 | 0.923242 | C | 1 |
| 14 | 0.923242 | C | 1 |
| 12 | 0.509348 | C | 1 |
| 12 | 0.509348 | C | 1 |
| 14 | 0.923242 | C | 1 |
| 14 | 0.923242 | C | 1 |
| 15 | 0.363497 | C | 1 |
| 15 | 0.363497 | C | 1 |
| 15 | 0.363497 | C | 1 |
| 6  | 0.690923 | A | 0 |
| 6  | 0.690923 | A | 0 |
| 6  | 0.690923 | A | 0 |
| 15 | 0.363497 | C | 1 |
| 6  | 0.690923 | A | 0 |
| 15 | 0.363497 | C | 1 |
| 6  | 0.690923 | A | 0 |
| 6  | 0.690923 | A | 0 |
| 15 | 0.363497 | C | 1 |
| 13 | 0.661083 | E | 1 |
| 13 | 0.661083 | E | 1 |
| 13 | 0.661083 | E | 1 |
| 13 | 0.661083 | E | 1 |
| 13 | 0.661083 | E | 1 |
| 13 | 0.661083 | E | 1 |
| 13 | 0.661083 | E | 1 |
| 13 | 0.661083 | E | 1 |
| 13 | 0.661083 | E | 1 |
| 13 | 0.661083 | E | 1 |
| 13 | 0.661083 | E | 1 |
| 13 | 0.661083 | E | 1 |
| 13 | 0.661083 | E | 1 |
| 13 | 0.661083 | E | 1 |
| 13 | 0.661083 | E | 1 |
| 13 | 0.661083 | E | 1 |
| 13 | 0.661083 | E | 1 |
| 13 | 0.661083 | E | 1 |
| 13 | 0.661083 | E | 1 |
| 13 | 0.661083 | E | 1 |
| 4  | 0.30626  | C | 1 |
| 13 | 0.331697 | C | 1 |
| 5  | 0.351074 | B | 1 |
| 13 | 0.331697 | C | 1 |
| 13 | 0.331697 | C | 1 |
| 13 | 0.331697 | C | 1 |
| 4  | 0.30626  | C | 1 |
| 17 | 0.58123  | C | 1 |
| 4  | 0.30626  | C | 1 |
| 4  | 0.30626  | C | 1 |
| 1  | 0.601713 | C | 1 |
| 17 | 0.58123  | C | 1 |

|    |          |   |   |
|----|----------|---|---|
| 18 | 0.376104 | A | 0 |
| 4  | 0.30626  | C | 1 |
| 13 | 0.331697 | C | 1 |
| 4  | 0.30626  | C | 1 |
| 5  | 0.351074 | B | 1 |
| 5  | 0.351074 | B | 1 |
| 5  | 0.351074 | B | 1 |
| 18 | 0.376104 | A | 0 |
| 1  | 0.601713 | C | 1 |
| 13 | 0.331697 | C | 1 |
| 1  | 0.601713 | C | 1 |
| 17 | 0.58123  | C | 1 |
| 17 | 0.58123  | C | 1 |
| 4  | 0.30626  | C | 1 |
| 17 | 0.58123  | C | 1 |
| 1  | 0.601713 | C | 1 |
| 1  | 0.601713 | C | 1 |
| 4  | 0.30626  | C | 1 |
| 5  | 0.351074 | B | 1 |
| 17 | 0.58123  | C | 1 |
| 5  | 0.351074 | B | 1 |
| 4  | 0.30626  | C | 1 |
| 1  | 0.601713 | C | 1 |
| 17 | 0.58123  | C | 1 |
| 13 | 0.331697 | C | 1 |
| 17 | 0.58123  | C | 1 |
| 17 | 0.58123  | C | 1 |
| 1  | 0.601713 | C | 1 |
| 5  | 0.351074 | B | 1 |
| 18 | 0.376104 | A | 0 |
| 1  | 0.601713 | C | 1 |
| 17 | 0.58123  | C | 1 |
| 18 | 0.387735 | C | 1 |
| 18 | 0.387735 | C | 1 |
| 18 | 0.387735 | C | 1 |
| 15 | 0.670948 | C | 1 |
| 18 | 0.318577 | C | 1 |
| 14 | 0.673616 | C | 1 |
| 18 | 0.318577 | C | 1 |
| 14 | 0.673616 | C | 1 |
| 18 | 0.318577 | C | 1 |
| 18 | 0.318577 | C | 1 |
| 18 | 0.318577 | C | 1 |
| 18 | 0.318577 | C | 1 |
| 18 | 0.318577 | C | 1 |
| 18 | 0.318577 | C | 1 |
| 15 | 0.670948 | C | 1 |
| 18 | 0.318577 | C | 1 |
| 18 | 0.318577 | C | 1 |
| 4  | 0.094222 | C | 1 |
| 11 | 0.26826  | C | 1 |
| 4  | 0.094222 | C | 1 |
| 18 | 0.318577 | C | 1 |
| 18 | 0.318577 | C | 1 |
| 18 | 0.318577 | C | 1 |

|    |          |   |   |
|----|----------|---|---|
| 14 | 0.673616 | C | 1 |
| 15 | 0.670948 | C | 1 |
| 15 | 0.670948 | C | 1 |
| 15 | 0.670948 | C | 1 |
| 11 | 0.26826  | C | 1 |
| 18 | 0.318577 | C | 1 |
| 11 | 0.26826  | C | 1 |
| 4  | 0.094222 | C | 1 |
| 18 | 0.318577 | C | 1 |
| 18 | 0.318577 | C | 1 |
| 18 | 0.318577 | C | 1 |
| 11 | 0.26826  | C | 1 |
| 14 | 0.673616 | C | 1 |
| 18 | 0.318577 | C | 1 |
| 18 | 0.318577 | C | 1 |
| 18 | 0.318577 | C | 1 |
| 18 | 0.318577 | C | 1 |
| 18 | 0.318577 | C | 1 |
| 18 | 0.318577 | C | 1 |
| 18 | 0.318577 | C | 1 |
| 14 | 0.673616 | C | 1 |
| 11 | 0.26826  | C | 1 |
| 18 | 0.318577 | C | 1 |
| 18 | 0.318577 | C | 1 |
| 17 | 0.234055 | C | 1 |
| 12 | 0.250181 | F | 0 |
| 17 | 0.234055 | C | 1 |
| 17 | 0.234055 | C | 1 |
| 17 | 0.234055 | C | 1 |
| 12 | 0.250181 | F | 0 |
| 17 | 0.234055 | C | 1 |
| 17 | 0.234055 | C | 1 |
| 17 | 0.234055 | C | 1 |
| 12 | 0.250181 | F | 0 |
| 17 | 0.234055 | C | 1 |
| 4  | 0.545402 | C | 1 |
| 4  | 0.545402 | C | 1 |
| 4  | 0.545402 | C | 1 |
| 4  | 0.545402 | C | 1 |
| 4  | 0.545402 | C | 1 |
| 4  | 0.545402 | C | 1 |
| 4  | 0.545402 | C | 1 |
| 4  | 0.545402 | C | 1 |
| 12 | 0.431673 | C | 1 |
| 1  | 0.541777 | C | 1 |
| 3  | 0.484426 | M | 0 |
| 19 | 0.292716 | C | 1 |
| 3  | 0.355089 | I | 0 |
| 16 | 0.756443 | C | 1 |
| 1  | 0.542915 | C | 1 |
| 15 | 0.826111 | C | 1 |
| 8  | 0.623715 | C | 1 |
| 22 | 0.519008 | C | 1 |
| 12 | 0.431673 | C | 1 |
| 16 | 0.756443 | C | 1 |

|    |          |   |   |
|----|----------|---|---|
| 16 | 0.756443 | C | 1 |
| 15 | 0.826111 | C | 1 |
| 3  | 0.484426 | M | 0 |
| 9  | 0.541512 | C | 1 |
| 18 | 0.429146 | C | 1 |
| 11 | 0.637527 | F | 0 |
| 14 | 0.506054 | C | 1 |
| 3  | 0.484426 | M | 0 |
| 4  | 0.199047 | C | 1 |
| 15 | 0.826111 | C | 1 |
| 15 | 0.826111 | C | 1 |
| 12 | 0.499911 | I | 0 |
| 19 | 0.292716 | C | 1 |
| 9  | 0.541512 | C | 1 |
| 12 | 0.431673 | C | 1 |
| 9  | 0.541512 | C | 1 |
| 1  | 0.087957 | C | 1 |
| 22 | 0.519008 | C | 1 |
| 1  | 0.542915 | C | 1 |
| 16 | 0.756443 | C | 1 |
| 1  | 0.541777 | C | 1 |
| 12 | 0.499911 | I | 0 |
| 12 | 0.499911 | I | 0 |
| 10 | 0.761901 | E | 1 |
| 8  | 0.390035 | C | 1 |
| 1  | 0.087957 | C | 1 |
| 4  | 0.3114   | N | 0 |
| 14 | 0.506054 | C | 1 |
| 4  | 0.3114   | N | 0 |
| 1  | 0.541777 | C | 1 |
| 3  | 0.355089 | I | 0 |
| 9  | 0.613958 | C | 1 |
| 9  | 0.613958 | C | 1 |
| 10 | 0.761901 | E | 1 |
| 3  | 0.348862 | C | 1 |
| 3  | 0.348862 | C | 1 |
| 18 | 0.456002 | C | 1 |
| 19 | 0.786691 | F | 0 |
| 16 | 0.756443 | C | 1 |
| 4  | 0.3114   | N | 0 |
| 4  | 0.3114   | N | 0 |
| 14 | 0.506054 | C | 1 |
| 3  | 0.484426 | M | 0 |
| 16 | 0.756443 | C | 1 |
| 1  | 0.542915 | C | 1 |
| 19 | 0.351899 | C | 1 |
| 16 | 0.756443 | C | 1 |
| 1  | 0.542915 | C | 1 |
| 10 | 0.761901 | E | 1 |
| 18 | 0.456002 | C | 1 |
| 12 | 0.499911 | I | 0 |
| 14 | 0.506054 | C | 1 |
| 10 | 0.761901 | E | 1 |
| 19 | 0.292716 | C | 1 |

|    |          |   |   |
|----|----------|---|---|
| 4  | 0.077441 | I | 0 |
| 18 | 0.429146 | C | 1 |
| 1  | 0.541777 | C | 1 |
| 6  | 0.176108 | I | 0 |
| 10 | 0.761901 | E | 1 |
| 4  | 0.3114   | N | 0 |
| 9  | 0.613958 | C | 1 |
| 9  | 0.613958 | C | 1 |
| 1  | 0.542915 | C | 1 |
| 1  | 0.087957 | C | 1 |
| 22 | 0.519008 | C | 1 |
| 14 | 0.506054 | C | 1 |
| 4  | 0.077441 | I | 0 |
| 19 | 0.292716 | C | 1 |
| 8  | 0.390035 | C | 1 |
| 9  | 0.613958 | C | 1 |
| 22 | 0.519008 | C | 1 |
| 3  | 0.355089 | I | 0 |
| 8  | 0.623715 | C | 1 |
| 18 | 0.456002 | C | 1 |
| 10 | 0.761901 | E | 1 |
| 12 | 0.431673 | C | 1 |
| 18 | 0.456002 | C | 1 |
| 6  | 0.176108 | I | 0 |
| 4  | 0.3114   | N | 0 |
| 3  | 0.348862 | C | 1 |
| 19 | 0.292716 | C | 1 |
| 15 | 0.826111 | C | 1 |
| 3  | 0.484426 | M | 0 |
| 12 | 0.499911 | I | 0 |
| 16 | 0.756443 | C | 1 |
| 5  | 0.211579 | C | 1 |
| 1  | 0.542915 | C | 1 |
| 10 | 0.761901 | E | 1 |
| 16 | 0.756443 | C | 1 |
| 19 | 0.292716 | C | 1 |
| 3  | 0.355089 | I | 0 |
| 1  | 0.53158  | M | 0 |
| 9  | 0.541512 | C | 1 |
| 16 | 0.756443 | C | 1 |
| 18 | 0.429146 | C | 1 |
| 8  | 0.390035 | C | 1 |
| 22 | 0.519008 | C | 1 |
| 1  | 0.087957 | C | 1 |
| 4  | 0.199047 | C | 1 |
| 12 | 0.499911 | I | 0 |
| 9  | 0.613958 | C | 1 |
| 1  | 0.53158  | M | 0 |
| 18 | 0.456002 | C | 1 |
| 10 | 0.761901 | E | 1 |
| 9  | 0.613958 | C | 1 |
| 15 | 0.826111 | C | 1 |
| 16 | 0.756443 | C | 1 |
| 9  | 0.541512 | C | 1 |



|    |          |   |   |
|----|----------|---|---|
| 4  | 0.199047 | C | 1 |
| 9  | 0.613958 | C | 1 |
| 8  | 0.623715 | C | 1 |
| 22 | 0.519008 | C | 1 |
| 14 | 0.506054 | C | 1 |
| 9  | 0.613958 | C | 1 |
| 8  | 0.623715 | C | 1 |
| 4  | 0.199047 | C | 1 |
| 1  | 0.53158  | M | 0 |
| 10 | 0.761901 | E | 1 |
| 16 | 0.756443 | C | 1 |
| 3  | 0.484426 | M | 0 |
| 3  | 0.484426 | M | 0 |
| 16 | 0.756443 | C | 1 |
| 8  | 0.390035 | C | 1 |
| 4  | 0.199047 | C | 1 |
| 14 | 0.506054 | C | 1 |
| 19 | 0.786691 | F | 0 |
| 14 | 0.506054 | C | 1 |
| 12 | 0.499911 | I | 0 |
| 11 | 0.637527 | F | 0 |
| 4  | 0.3114   | N | 0 |
| 11 | 0.637527 | F | 0 |
| 18 | 0.429146 | C | 1 |
| 19 | 0.292716 | C | 1 |
| 19 | 0.292716 | C | 1 |
| 4  | 0.3114   | N | 0 |
| 1  | 0.53158  | M | 0 |
| 16 | 0.756443 | C | 1 |
| 4  | 0.3114   | N | 0 |
| 18 | 0.429146 | C | 1 |
| 4  | 0.3114   | N | 0 |
| 18 | 0.429146 | C | 1 |
| 12 | 0.499911 | I | 0 |
| 15 | 0.826111 | C | 1 |
| 11 | 0.637527 | F | 0 |
| 1  | 0.53158  | M | 0 |
| 3  | 0.484426 | M | 0 |
| 4  | 0.199047 | C | 1 |
| 1  | 0.542915 | C | 1 |
| 12 | 0.499911 | I | 0 |
| 3  | 0.484426 | M | 0 |
| 12 | 0.499911 | I | 0 |
| 10 | 0.761901 | E | 1 |
| 15 | 0.826111 | C | 1 |
| 14 | 0.506054 | C | 1 |
| 9  | 0.541512 | C | 1 |
| 6  | 0.176108 | I | 0 |
| 10 | 0.761901 | E | 1 |
| 1  | 0.541777 | C | 1 |
| 4  | 0.199047 | C | 1 |
| 5  | 0.211579 | C | 1 |
| 4  | 0.199047 | C | 1 |
| 16 | 0.756443 | C | 1 |

|    |          |   |   |
|----|----------|---|---|
| 4  | 0.077441 | I | 0 |
| 15 | 0.826111 | C | 1 |
| 14 | 0.506054 | C | 1 |
| 3  | 0.348862 | C | 1 |
| 19 | 0.292716 | C | 1 |
| 9  | 0.541512 | C | 1 |
| 4  | 0.077441 | I | 0 |
| 16 | 0.756443 | C | 1 |
| 1  | 0.542915 | C | 1 |
| 12 | 0.431673 | C | 1 |
| 9  | 0.613958 | C | 1 |
| 8  | 0.623715 | C | 1 |
| 5  | 0.211579 | C | 1 |
| 8  | 0.390035 | C | 1 |
| 16 | 0.756443 | C | 1 |
| 3  | 0.484426 | M | 0 |
| 16 | 0.756443 | C | 1 |
| 8  | 0.623715 | C | 1 |
| 12 | 0.499911 | I | 0 |
| 3  | 0.348862 | C | 1 |
| 18 | 0.581643 | K | 1 |
| 12 | 0.431673 | C | 1 |
| 5  | 0.211579 | C | 1 |
| 22 | 0.519008 | C | 1 |
| 19 | 0.351899 | C | 1 |
| 9  | 0.541512 | C | 1 |
| 4  | 0.199047 | C | 1 |
| 16 | 0.756443 | C | 1 |
| 6  | 0.176108 | I | 0 |
| 3  | 0.484426 | M | 0 |
| 8  | 0.623715 | C | 1 |
| 12 | 0.499911 | I | 0 |
| 18 | 0.429146 | C | 1 |
| 19 | 0.292716 | C | 1 |
| 12 | 0.499911 | I | 0 |
| 8  | 0.623715 | C | 1 |
| 1  | 0.542915 | C | 1 |
| 9  | 0.541512 | C | 1 |
| 4  | 0.077441 | I | 0 |
| 18 | 0.456002 | C | 1 |
| 3  | 0.484426 | M | 0 |
| 19 | 0.292716 | C | 1 |
| 12 | 0.499911 | I | 0 |
| 5  | 0.211579 | C | 1 |
| 4  | 0.3114   | N | 0 |
| 3  | 0.484426 | M | 0 |
| 11 | 0.637527 | F | 0 |
| 4  | 0.077441 | I | 0 |
| 8  | 0.623715 | C | 1 |
| 19 | 0.292716 | C | 1 |
| 4  | 0.077441 | I | 0 |
| 4  | 0.199047 | C | 1 |
| 4  | 0.077441 | I | 0 |
| 19 | 0.351899 | C | 1 |

|    |          |   |   |
|----|----------|---|---|
| 4  | 0.3114   | N | 0 |
| 9  | 0.613958 | C | 1 |
| 4  | 0.077441 | I | 0 |
| 16 | 0.756443 | C | 1 |
| 19 | 0.351899 | C | 1 |
| 14 | 0.506054 | C | 1 |
| 16 | 0.756443 | C | 1 |
| 9  | 0.541512 | C | 1 |
| 5  | 0.211579 | C | 1 |
| 19 | 0.786691 | F | 0 |
| 18 | 0.429146 | C | 1 |
| 10 | 0.761901 | E | 1 |
| 9  | 0.541512 | C | 1 |
| 4  | 0.077441 | I | 0 |
| 19 | 0.351899 | C | 1 |
| 1  | 0.087957 | C | 1 |
| 4  | 0.199047 | C | 1 |
| 10 | 0.761901 | E | 1 |
| 16 | 0.756443 | C | 1 |
| 16 | 0.756443 | C | 1 |
| 5  | 0.211579 | C | 1 |
| 14 | 0.506054 | C | 1 |
| 8  | 0.623715 | C | 1 |
| 18 | 0.581643 | K | 1 |
| 8  | 0.390035 | C | 1 |
| 1  | 0.53158  | M | 0 |
| 8  | 0.390035 | C | 1 |
| 10 | 0.761901 | E | 1 |
| 10 | 0.761901 | E | 1 |
| 3  | 0.348862 | C | 1 |
| 8  | 0.623715 | C | 1 |
| 12 | 0.431673 | C | 1 |
| 1  | 0.53158  | M | 0 |
| 3  | 0.355089 | I | 0 |
| 4  | 0.077441 | I | 0 |
| 16 | 0.756443 | C | 1 |
| 1  | 0.53158  | M | 0 |
| 22 | 0.519008 | C | 1 |
| 3  | 0.484426 | M | 0 |
| 9  | 0.613958 | C | 1 |
| 16 | 0.756443 | C | 1 |
| 3  | 0.484426 | M | 0 |
| 4  | 0.3114   | N | 0 |
| 11 | 0.637527 | F | 0 |
| 18 | 0.581643 | K | 1 |
| 6  | 0.176108 | I | 0 |
| 18 | 0.384817 | C | 1 |
| 16 | 0.708903 | C | 1 |
| 4  | 0.171353 | C | 1 |
| 4  | 0.209107 | C | 1 |
| 5  | 0.375896 | C | 1 |
| 16 | 0.708903 | C | 1 |
| 3  | 0.432883 | A | 0 |
| 5  | 0.375896 | C | 1 |

|    |          |   |   |
|----|----------|---|---|
| 4  | 0.209107 | C | 1 |
| 18 | 0.384817 | C | 1 |
| 3  | 0.432883 | A | 0 |
| 5  | 0.375896 | C | 1 |
| 4  | 0.171353 | C | 1 |
| 16 | 0.708903 | C | 1 |
| 5  | 0.375896 | C | 1 |
| 5  | 0.375896 | C | 1 |
| 16 | 0.708903 | C | 1 |
| 3  | 0.432883 | A | 0 |
| 4  | 0.209107 | C | 1 |
| 4  | 0.171353 | C | 1 |
| 3  | 0.432883 | A | 0 |
| 5  | 0.375896 | C | 1 |
| 4  | 0.209107 | C | 1 |
| 18 | 0.384817 | C | 1 |
| 16 | 0.708903 | C | 1 |
| 3  | 0.432883 | A | 0 |
| 18 | 0.384817 | C | 1 |
| 5  | 0.375896 | C | 1 |
| 5  | 0.375896 | C | 1 |
| 5  | 0.375896 | C | 1 |
| 16 | 0.708903 | C | 1 |
| 16 | 0.708903 | C | 1 |
| 5  | 0.375896 | C | 1 |
| 16 | 0.708903 | C | 1 |
| 3  | 0.432883 | A | 0 |
| 4  | 0.209107 | C | 1 |
| 4  | 0.209107 | C | 1 |
| 11 | 0.453357 | C | 1 |
| 11 | 0.453357 | C | 1 |
| 14 | 0.407934 | C | 1 |
| 3  | 0.152932 | C | 1 |
| 13 | 0.547942 | C | 1 |
| 8  | 0.636224 | C | 1 |
| 13 | 0.547942 | C | 1 |
| 3  | 0.152932 | C | 1 |
| 4  | 0.187173 | C | 1 |
| 3  | 0.152932 | C | 1 |
| 4  | 0.187173 | C | 1 |
| 13 | 0.547942 | C | 1 |
| 15 | 0.467764 | C | 1 |
| 8  | 0.636224 | C | 1 |
| 14 | 0.407934 | C | 1 |
| 14 | 0.407934 | C | 1 |
| 19 | 0.120874 | C | 1 |
| 14 | 0.407934 | C | 1 |
| 8  | 0.636224 | C | 1 |
| 13 | 0.547942 | C | 1 |
| 12 | 0.756251 | C | 1 |
| 14 | 0.407934 | C | 1 |
| 8  | 0.636224 | C | 1 |
| 11 | 0.453357 | C | 1 |
| 8  | 0.636224 | C | 1 |

|    |          |   |   |
|----|----------|---|---|
| 14 | 0.407934 | C | 1 |
| 13 | 0.547942 | C | 1 |
| 8  | 0.636224 | C | 1 |
| 19 | 0.120874 | C | 1 |
| 13 | 0.547942 | C | 1 |
| 8  | 0.636224 | C | 1 |
| 22 | 0.430844 | C | 1 |
| 19 | 0.120874 | C | 1 |
| 13 | 0.547942 | C | 1 |
| 14 | 0.407934 | C | 1 |
| 22 | 0.430844 | C | 1 |
| 11 | 0.453357 | C | 1 |
| 13 | 0.547942 | C | 1 |
| 12 | 0.756251 | C | 1 |
| 13 | 0.547942 | C | 1 |
| 13 | 0.547942 | C | 1 |
| 19 | 0.120874 | C | 1 |
| 14 | 0.407934 | C | 1 |
| 11 | 0.453357 | C | 1 |
| 14 | 0.407934 | C | 1 |
| 12 | 0.756251 | C | 1 |
| 4  | 0.187173 | C | 1 |
| 19 | 0.120874 | C | 1 |
| 13 | 0.547942 | C | 1 |
| 3  | 0.152932 | C | 1 |
| 8  | 0.636224 | C | 1 |
| 12 | 0.756251 | C | 1 |
| 13 | 0.547942 | C | 1 |
| 11 | 0.453357 | C | 1 |
| 4  | 0.187173 | C | 1 |
| 14 | 0.407934 | C | 1 |
| 14 | 0.407934 | C | 1 |
| 14 | 0.407934 | C | 1 |
| 11 | 0.453357 | C | 1 |
| 14 | 0.407934 | C | 1 |
| 15 | 0.467764 | C | 1 |
| 19 | 0.120874 | C | 1 |
| 15 | 0.467764 | C | 1 |
| 4  | 0.187173 | C | 1 |
| 14 | 0.407934 | C | 1 |
| 19 | 0.120874 | C | 1 |
| 11 | 0.453357 | C | 1 |
| 12 | 0.756251 | C | 1 |
| 15 | 0.467764 | C | 1 |
| 13 | 0.547942 | C | 1 |
| 13 | 0.547942 | C | 1 |
| 8  | 0.636224 | C | 1 |
| 4  | 0.187173 | C | 1 |
| 12 | 0.756251 | C | 1 |
| 4  | 0.187173 | C | 1 |
| 15 | 0.467764 | C | 1 |
| 4  | 0.187173 | C | 1 |
| 14 | 0.407934 | C | 1 |
| 13 | 0.547942 | C | 1 |

|    |          |   |   |
|----|----------|---|---|
| 4  | 0.187173 | C | 1 |
| 4  | 0.187173 | C | 1 |
| 8  | 0.636224 | C | 1 |
| 14 | 0.407934 | C | 1 |
| 15 | 0.467764 | C | 1 |
| 4  | 0.187173 | C | 1 |
| 12 | 0.756251 | C | 1 |
| 19 | 0.120874 | C | 1 |
| 13 | 0.547942 | C | 1 |
| 22 | 0.430844 | C | 1 |
| 14 | 0.407934 | C | 1 |
| 11 | 0.453357 | C | 1 |
| 14 | 0.407934 | C | 1 |
| 19 | 0.120874 | C | 1 |
| 13 | 0.547942 | C | 1 |
| 3  | 0.152932 | C | 1 |
| 15 | 0.467764 | C | 1 |
| 8  | 0.636224 | C | 1 |
| 13 | 0.547942 | C | 1 |
| 9  | 0.674466 | C | 1 |
| 1  | 0.501664 | A | 0 |
| 4  | 0.406436 | C | 1 |
| 4  | 0.406436 | C | 1 |
| 9  | 0.674466 | C | 1 |
| 4  | 0.406436 | C | 1 |
| 1  | 0.501664 | A | 0 |
| 4  | 0.406436 | C | 1 |
| 8  | 0.320136 | C | 1 |
| 8  | 0.320136 | C | 1 |
| 4  | 0.406436 | C | 1 |
| 4  | 0.406436 | C | 1 |
| 4  | 0.406436 | C | 1 |
| 4  | 0.406436 | C | 1 |
| 8  | 0.320136 | C | 1 |
| 8  | 0.320136 | C | 1 |
| 8  | 0.320136 | C | 1 |
| 4  | 0.406436 | C | 1 |
| 9  | 0.674466 | C | 1 |
| 1  | 0.501664 | A | 0 |
| 4  | 0.405232 | C | 1 |
| 7  | 0.460042 | C | 1 |
| 5  | 0.27038  | C | 1 |
| 5  | 0.506538 | C | 1 |
| 13 | 0.484921 | C | 1 |
| 5  | 0.32542  | I | 0 |
| 4  | 0.232075 | I | 0 |
| 7  | 0.460042 | C | 1 |
| 5  | 0.176348 | M | 0 |
| 22 | 0.764673 | C | 1 |
| 5  | 0.27038  | C | 1 |
| 21 | 0.666229 | C | 1 |
| 4  | 0.411487 | C | 1 |
| 22 | 0.764673 | C | 1 |
| 5  | 0.506538 | C | 1 |

|    |          |   |   |
|----|----------|---|---|
| 5  | 0.176348 | M | 0 |
| 13 | 0.484921 | C | 1 |
| 22 | 0.764673 | C | 1 |
| 18 | 0.705449 | F | 0 |
| 22 | 0.764673 | C | 1 |
| 4  | 0.405232 | C | 1 |
| 4  | 0.411487 | C | 1 |
| 5  | 0.519805 | C | 1 |
| 7  | 0.460042 | C | 1 |
| 5  | 0.506538 | C | 1 |
| 5  | 0.32542  | I | 0 |
| 5  | 0.27038  | C | 1 |
| 22 | 0.764673 | C | 1 |
| 4  | 0.232075 | I | 0 |
| 4  | 0.411487 | C | 1 |
| 18 | 0.705449 | F | 0 |
| 4  | 0.444351 | C | 1 |
| 21 | 0.666229 | C | 1 |
| 4  | 0.232075 | I | 0 |
| 21 | 0.666229 | C | 1 |
| 4  | 0.232075 | I | 0 |
| 13 | 0.484921 | C | 1 |
| 5  | 0.176348 | M | 0 |
| 3  | 0.13757  | C | 1 |
| 4  | 0.411487 | C | 1 |
| 5  | 0.176348 | M | 0 |
| 5  | 0.176348 | M | 0 |
| 1  | 0.242775 | C | 1 |
| 5  | 0.21876  | I | 0 |
| 5  | 0.176348 | M | 0 |
| 4  | 0.405232 | C | 1 |
| 5  | 0.176348 | M | 0 |
| 13 | 0.484921 | C | 1 |
| 5  | 0.27038  | C | 1 |
| 5  | 0.176348 | M | 0 |
| 4  | 0.444351 | C | 1 |
| 5  | 0.176348 | M | 0 |
| 13 | 0.484921 | C | 1 |
| 5  | 0.27038  | C | 1 |
| 4  | 0.405232 | C | 1 |
| 5  | 0.27038  | C | 1 |
| 4  | 0.405232 | C | 1 |
| 3  | 0.13757  | C | 1 |
| 4  | 0.232075 | I | 0 |
| 13 | 0.484921 | C | 1 |
| 7  | 0.460042 | C | 1 |
| 5  | 0.506538 | C | 1 |
| 4  | 0.444351 | C | 1 |
| 4  | 0.444351 | C | 1 |
| 5  | 0.519805 | C | 1 |
| 4  | 0.411487 | C | 1 |
| 13 | 0.117242 | C | 1 |
| 22 | 0.764673 | C | 1 |
| 5  | 0.176348 | M | 0 |

|    |          |   |   |
|----|----------|---|---|
| 5  | 0.519805 | C | 1 |
| 13 | 0.117242 | C | 1 |
| 5  | 0.519805 | C | 1 |
| 22 | 0.764673 | C | 1 |
| 21 | 0.666229 | C | 1 |
| 7  | 0.460042 | C | 1 |
| 22 | 0.764673 | C | 1 |
| 7  | 0.460042 | C | 1 |
| 5  | 0.519805 | C | 1 |
| 13 | 0.484921 | C | 1 |
| 13 | 0.484921 | C | 1 |
| 18 | 0.705449 | F | 0 |
| 5  | 0.176348 | M | 0 |
| 3  | 0.13757  | C | 1 |
| 5  | 0.21876  | I | 0 |
| 21 | 0.666229 | C | 1 |
| 5  | 0.21876  | I | 0 |
| 5  | 0.519805 | C | 1 |
| 4  | 0.405232 | C | 1 |
| 18 | 0.705449 | F | 0 |
| 4  | 0.405232 | C | 1 |
| 13 | 0.484921 | C | 1 |
| 5  | 0.176348 | M | 0 |
| 22 | 0.764673 | C | 1 |
| 5  | 0.27038  | C | 1 |
| 21 | 0.666229 | C | 1 |
| 4  | 0.232075 | I | 0 |
| 21 | 0.666229 | C | 1 |
| 4  | 0.411487 | C | 1 |
| 13 | 0.117242 | C | 1 |
| 5  | 0.519805 | C | 1 |
| 4  | 0.405232 | C | 1 |
| 5  | 0.32542  | I | 0 |
| 13 | 0.484921 | C | 1 |
| 1  | 0.242775 | C | 1 |
| 4  | 0.405232 | C | 1 |
| 5  | 0.176348 | M | 0 |
| 4  | 0.444351 | C | 1 |
| 5  | 0.27038  | C | 1 |
| 1  | 0.242775 | C | 1 |
| 5  | 0.32542  | I | 0 |
| 5  | 0.506538 | C | 1 |
| 13 | 0.484921 | C | 1 |
| 22 | 0.764673 | C | 1 |
| 7  | 0.460042 | C | 1 |
| 13 | 0.484921 | C | 1 |
| 5  | 0.176348 | M | 0 |
| 4  | 0.444351 | C | 1 |
| 5  | 0.506538 | C | 1 |
| 5  | 0.519805 | C | 1 |
| 4  | 0.411487 | C | 1 |
| 1  | 0.242775 | C | 1 |
| 4  | 0.411487 | C | 1 |
| 22 | 0.764673 | C | 1 |



|    |          |   |   |
|----|----------|---|---|
| 5  | 0.21876  | I | 0 |
| 18 | 0.705449 | F | 0 |
| 5  | 0.32542  | I | 0 |
| 4  | 0.232075 | I | 0 |
| 3  | 0.13757  | C | 1 |
| 22 | 0.764673 | C | 1 |
| 13 | 0.484921 | C | 1 |
| 4  | 0.405232 | C | 1 |
| 5  | 0.506538 | C | 1 |
| 5  | 0.32542  | I | 0 |
| 21 | 0.666229 | C | 1 |
| 5  | 0.506538 | C | 1 |
| 7  | 0.460042 | C | 1 |
| 3  | 0.13757  | C | 1 |
| 13 | 0.484921 | C | 1 |
| 5  | 0.506538 | C | 1 |
| 13 | 0.117242 | C | 1 |
| 5  | 0.176348 | M | 0 |
| 5  | 0.21876  | I | 0 |
| 18 | 0.705449 | F | 0 |
| 4  | 0.411487 | C | 1 |
| 5  | 0.519805 | C | 1 |
| 5  | 0.519805 | C | 1 |
| 21 | 0.666229 | C | 1 |
| 13 | 0.117242 | C | 1 |
| 13 | 0.484921 | C | 1 |
| 1  | 0.242775 | C | 1 |
| 21 | 0.666229 | C | 1 |
| 5  | 0.21876  | I | 0 |
| 4  | 0.444351 | C | 1 |
| 6  | 0.09764  | C | 1 |
| 11 | 0.660671 | C | 1 |
| 11 | 0.446834 | C | 1 |
| 19 | 0.267228 | C | 1 |
| 4  | 0.581935 | C | 1 |
| 14 | 0.740259 | C | 1 |
| 18 | 0.268832 | A | 0 |
| 14 | 0.740259 | C | 1 |
| 18 | 0.268832 | A | 0 |
| 11 | 0.660671 | C | 1 |
| 7  | 0.222538 | I | 0 |
| 14 | 0.740259 | C | 1 |
| 7  | 0.222538 | I | 0 |
| 18 | 0.767251 | C | 1 |
| 14 | 0.740259 | C | 1 |
| 4  | 0.581935 | C | 1 |
| 11 | 0.675165 | C | 1 |
| 1  | 0.611499 | C | 1 |
| 7  | 0.222538 | I | 0 |
| 4  | 0.235012 | C | 1 |
| 4  | 0.581935 | C | 1 |
| 7  | 0.222538 | I | 0 |
| 8  | 0.653375 | E | 1 |
| 7  | 0.222538 | I | 0 |

|    |          |   |   |
|----|----------|---|---|
| 4  | 0.235012 | C | 1 |
| 14 | 0.740259 | C | 1 |
| 18 | 0.507033 | C | 1 |
| 4  | 0.434887 | C | 1 |
| 4  | 0.434887 | C | 1 |
| 18 | 0.507033 | C | 1 |
| 14 | 0.740259 | C | 1 |
| 4  | 0.581935 | C | 1 |
| 14 | 0.740259 | C | 1 |
| 3  | 0.113748 | C | 1 |
| 7  | 0.222538 | I | 0 |
| 14 | 0.740259 | C | 1 |
| 1  | 0.611499 | C | 1 |
| 14 | 0.740259 | C | 1 |
| 4  | 0.644013 | C | 1 |
| 8  | 0.653375 | E | 1 |
| 17 | 0.244063 | C | 1 |
| 4  | 0.235012 | C | 1 |
| 18 | 0.268832 | A | 0 |
| 4  | 0.235012 | C | 1 |
| 5  | 0.290764 | I | 0 |
| 18 | 0.767251 | C | 1 |
| 4  | 0.434887 | C | 1 |
| 4  | 0.360102 | C | 1 |
| 18 | 0.507033 | C | 1 |
| 4  | 0.434887 | C | 1 |
| 22 | 0.622796 | C | 1 |
| 1  | 0.769542 | N | 0 |
| 14 | 0.740259 | C | 1 |
| 5  | 0.290764 | I | 0 |
| 8  | 0.653375 | E | 1 |
| 11 | 0.675165 | C | 1 |
| 4  | 0.644013 | C | 1 |
| 3  | 0.113748 | C | 1 |
| 19 | 0.267228 | C | 1 |
| 14 | 0.740259 | C | 1 |
| 1  | 0.769542 | N | 0 |
| 14 | 0.740259 | C | 1 |
| 7  | 0.222538 | I | 0 |
| 18 | 0.767251 | C | 1 |
| 1  | 0.378571 | C | 1 |
| 18 | 0.767251 | C | 1 |
| 6  | 0.09764  | C | 1 |
| 18 | 0.507033 | C | 1 |
| 14 | 0.740259 | C | 1 |
| 11 | 0.660671 | C | 1 |
| 1  | 0.769542 | N | 0 |
| 1  | 0.378571 | C | 1 |
| 7  | 0.222538 | I | 0 |
| 1  | 0.769542 | N | 0 |
| 22 | 0.622796 | C | 1 |
| 8  | 0.653375 | E | 1 |
| 14 | 0.740259 | C | 1 |
| 7  | 0.222538 | I | 0 |

|    |          |   |   |
|----|----------|---|---|
| 6  | 0.09764  | C | 1 |
| 14 | 0.740259 | C | 1 |
| 8  | 0.653375 | E | 1 |
| 18 | 0.507033 | C | 1 |
| 18 | 0.767251 | C | 1 |
| 4  | 0.644013 | C | 1 |
| 11 | 0.660671 | C | 1 |
| 5  | 0.2905   | A | 0 |
| 1  | 0.769542 | N | 0 |
| 17 | 0.244063 | C | 1 |
| 19 | 0.267228 | C | 1 |
| 14 | 0.740259 | C | 1 |
| 5  | 0.290764 | I | 0 |
| 6  | 0.09764  | C | 1 |
| 14 | 0.740259 | C | 1 |
| 7  | 0.222538 | I | 0 |
| 4  | 0.360102 | C | 1 |
| 19 | 0.267228 | C | 1 |
| 5  | 0.290764 | I | 0 |
| 5  | 0.2905   | A | 0 |
| 5  | 0.2905   | A | 0 |
| 5  | 0.290764 | I | 0 |
| 1  | 0.611499 | C | 1 |
| 1  | 0.769542 | N | 0 |
| 6  | 0.09764  | C | 1 |
| 18 | 0.268832 | A | 0 |
| 5  | 0.290764 | I | 0 |
| 11 | 0.446834 | C | 1 |
| 18 | 0.767251 | C | 1 |
| 18 | 0.507033 | C | 1 |
| 11 | 0.675165 | C | 1 |
| 11 | 0.675165 | C | 1 |
| 19 | 0.267228 | C | 1 |
| 7  | 0.222538 | I | 0 |
| 4  | 0.235012 | C | 1 |
| 14 | 0.740259 | C | 1 |
| 1  | 0.769542 | N | 0 |
| 1  | 0.769542 | N | 0 |
| 14 | 0.740259 | C | 1 |
| 11 | 0.675165 | C | 1 |
| 22 | 0.622796 | C | 1 |
| 18 | 0.767251 | C | 1 |
| 4  | 0.644013 | C | 1 |
| 22 | 0.622796 | C | 1 |
| 5  | 0.2905   | A | 0 |
| 14 | 0.740259 | C | 1 |
| 1  | 0.611499 | C | 1 |
| 17 | 0.244063 | C | 1 |
| 4  | 0.581935 | C | 1 |
| 7  | 0.222538 | I | 0 |
| 17 | 0.244063 | C | 1 |
| 5  | 0.2905   | A | 0 |
| 14 | 0.740259 | C | 1 |
| 1  | 0.378571 | C | 1 |

|    |          |   |   |
|----|----------|---|---|
| 1  | 0.611499 | C | 1 |
| 11 | 0.446834 | C | 1 |
| 14 | 0.740259 | C | 1 |
| 7  | 0.222538 | I | 0 |
| 4  | 0.360102 | C | 1 |
| 4  | 0.581935 | C | 1 |
| 19 | 0.267228 | C | 1 |
| 4  | 0.644013 | C | 1 |
| 17 | 0.244063 | C | 1 |
| 7  | 0.222538 | I | 0 |
| 7  | 0.222538 | I | 0 |
| 11 | 0.446834 | C | 1 |
| 14 | 0.740259 | C | 1 |
| 18 | 0.507033 | C | 1 |
| 17 | 0.244063 | C | 1 |
| 6  | 0.09764  | C | 1 |
| 1  | 0.611499 | C | 1 |
| 4  | 0.235012 | C | 1 |
| 22 | 0.622796 | C | 1 |
| 11 | 0.660671 | C | 1 |
| 18 | 0.767251 | C | 1 |
| 19 | 0.267228 | C | 1 |
| 4  | 0.644013 | C | 1 |
| 1  | 0.769542 | N | 0 |
| 18 | 0.268832 | A | 0 |
| 18 | 0.268832 | A | 0 |
| 14 | 0.740259 | C | 1 |
| 22 | 0.622796 | C | 1 |
| 4  | 0.434887 | C | 1 |
| 8  | 0.653375 | E | 1 |
| 4  | 0.235012 | C | 1 |
| 3  | 0.113748 | C | 1 |
| 22 | 0.622796 | C | 1 |
| 14 | 0.740259 | C | 1 |
| 4  | 0.434887 | C | 1 |
| 1  | 0.378571 | C | 1 |
| 22 | 0.622796 | C | 1 |
| 4  | 0.235012 | C | 1 |
| 14 | 0.740259 | C | 1 |
| 7  | 0.222538 | I | 0 |
| 17 | 0.244063 | C | 1 |
| 18 | 0.507033 | C | 1 |
| 19 | 0.267228 | C | 1 |
| 1  | 0.769542 | N | 0 |
| 4  | 0.235012 | C | 1 |
| 14 | 0.740259 | C | 1 |
| 7  | 0.222538 | I | 0 |
| 14 | 0.740259 | C | 1 |
| 6  | 0.09764  | C | 1 |
| 21 | 0.32973  | C | 1 |
| 21 | 0.32973  | C | 1 |
| 21 | 0.32973  | C | 1 |
| 17 | 0.923242 | C | 1 |
| 17 | 0.923242 | C | 1 |

|    |          |   |   |
|----|----------|---|---|
| 17 | 0.923242 | C | 1 |
| 17 | 0.923242 | C | 1 |
| 17 | 0.923242 | C | 1 |
| 17 | 0.923242 | C | 1 |
| 17 | 0.923242 | C | 1 |
| 16 | 0.188856 | C | 1 |
| 3  | 0.44063  | C | 1 |
| 3  | 0.512029 | N | 0 |
| 3  | 0.512029 | N | 0 |
| 3  | 0.512029 | N | 0 |
| 3  | 0.512029 | N | 0 |
| 3  | 0.44063  | C | 1 |
| 16 | 0.188856 | C | 1 |
| 3  | 0.512029 | N | 0 |
| 19 | 0.491662 | C | 1 |
| 19 | 0.491662 | C | 1 |
| 3  | 0.512029 | N | 0 |
| 19 | 0.491662 | C | 1 |
| 3  | 0.44063  | C | 1 |
| 19 | 0.491662 | C | 1 |
| 3  | 0.44063  | C | 1 |
| 3  | 0.512029 | N | 0 |
| 19 | 0.491662 | C | 1 |
| 19 | 0.491662 | C | 1 |
| 3  | 0.44063  | C | 1 |
| 16 | 0.188856 | C | 1 |
| 16 | 0.283365 | C | 1 |
| 3  | 0.137526 | C | 1 |
| 22 | 0.635793 | C | 1 |
| 21 | 0.894475 | E | 1 |
| 15 | 0.329456 | I | 0 |
| 5  | 0.582516 | C | 1 |
| 1  | 0.306579 | C | 1 |
| 5  | 0.582516 | C | 1 |
| 16 | 0.655222 | C | 1 |
| 22 | 0.635793 | C | 1 |
| 5  | 0.582516 | C | 1 |
| 16 | 0.283365 | C | 1 |
| 5  | 0.298851 | C | 1 |
| 3  | 0.137526 | C | 1 |
| 15 | 0.710769 | C | 1 |
| 5  | 0.298851 | C | 1 |
| 15 | 0.710769 | C | 1 |
| 21 | 0.894475 | E | 1 |
| 5  | 0.298851 | C | 1 |
| 22 | 0.635793 | C | 1 |
| 18 | 0.343083 | C | 1 |
| 5  | 0.298851 | C | 1 |
| 1  | 0.306579 | C | 1 |
| 5  | 0.582516 | C | 1 |
| 22 | 0.635793 | C | 1 |
| 17 | 0.488878 | C | 1 |
| 21 | 0.494745 | F | 0 |
| 15 | 0.329456 | I | 0 |

|                |   |
|----------------|---|
| 15 0. 710769 C | 1 |
| 17 0. 488878 C | 1 |
| 1 0. 306579 C  | 1 |
| 21 0. 494745 F | 0 |
| 22 0. 635793 C | 1 |
| 5 0. 582516 C  | 1 |
| 1 0. 306579 C  | 1 |
| 18 0. 343083 C | 1 |
| 16 0. 283365 C | 1 |
| 5 0. 582516 C  | 1 |
| 15 0. 329456 I | 0 |
| 5 0. 298851 C  | 1 |
| 15 0. 329456 I | 0 |
| 1 0. 306579 C  | 1 |
| 5 0. 582516 C  | 1 |
| 22 0. 635793 C | 1 |
| 5 0. 582516 C  | 1 |
| 21 0. 894475 E | 1 |
| 22 0. 635793 C | 1 |
| 5 0. 582516 C  | 1 |
| 3 0. 137526 C  | 1 |
| 15 0. 329456 I | 0 |
| 21 0. 894475 E | 1 |
| 21 0. 894475 E | 1 |
| 3 0. 137526 C  | 1 |
| 3 0. 137526 C  | 1 |
| 16 0. 655222 C | 1 |
| 3 0. 137526 C  | 1 |
| 17 0. 488878 C | 1 |
| 1 0. 306579 C  | 1 |
| 5 0. 582516 C  | 1 |
| 5 0. 582516 C  | 1 |
| 15 0. 710769 C | 1 |
| 22 0. 456414 C | 1 |
| 21 0. 894475 E | 1 |
| 17 0. 488878 C | 1 |
| 16 0. 283365 C | 1 |
| 3 0. 137526 C  | 1 |
| 22 0. 635793 C | 1 |
| 18 0. 343083 C | 1 |
| 1 0. 306579 C  | 1 |
| 22 0. 635793 C | 1 |
| 16 0. 655222 C | 1 |
| 15 0. 329456 I | 0 |
| 21 0. 894475 E | 1 |
| 21 0. 894475 E | 1 |
| 16 0. 283365 C | 1 |
| 5 0. 298851 C  | 1 |
| 16 0. 655222 C | 1 |
| 18 0. 343083 C | 1 |
| 18 0. 343083 C | 1 |
| 15 0. 329456 I | 0 |
| 22 0. 456414 C | 1 |
| 21 0. 494745 F | 0 |

|    |          |   |   |
|----|----------|---|---|
| 3  | 0.137526 | C | 1 |
| 16 | 0.283365 | C | 1 |
| 22 | 0.635793 | C | 1 |
| 16 | 0.283365 | C | 1 |
| 1  | 0.306579 | C | 1 |
| 5  | 0.582516 | C | 1 |
| 5  | 0.582516 | C | 1 |
| 17 | 0.488878 | C | 1 |
| 16 | 0.283365 | C | 1 |
| 21 | 0.494745 | F | 0 |
| 21 | 0.894475 | E | 1 |
| 22 | 0.456414 | C | 1 |
| 16 | 0.655222 | C | 1 |
| 21 | 0.494745 | F | 0 |
| 3  | 0.137526 | C | 1 |
| 21 | 0.894475 | E | 1 |
| 22 | 0.456414 | C | 1 |
| 16 | 0.283365 | C | 1 |
| 22 | 0.456414 | C | 1 |
| 16 | 0.283365 | C | 1 |
| 21 | 0.894475 | E | 1 |
| 16 | 0.283365 | C | 1 |
| 22 | 0.456414 | C | 1 |
| 1  | 0.306579 | C | 1 |
| 17 | 0.488878 | C | 1 |
| 22 | 0.456414 | C | 1 |
| 1  | 0.306579 | C | 1 |
| 17 | 0.867773 | C | 1 |
| 17 | 0.867773 | C | 1 |
| 12 | 0.665244 | C | 1 |
| 17 | 0.867773 | C | 1 |
| 17 | 0.867773 | C | 1 |
| 11 | 0.600533 | C | 1 |
| 12 | 0.665244 | C | 1 |
| 1  | 0.082934 | C | 1 |
| 1  | 0.082934 | C | 1 |
| 12 | 0.665244 | C | 1 |
| 11 | 0.600533 | C | 1 |
| 11 | 0.600533 | C | 1 |
| 10 | 0.28943  | C | 1 |
| 10 | 0.28943  | C | 1 |
| 11 | 0.600533 | C | 1 |
| 12 | 0.665244 | C | 1 |
| 10 | 0.28943  | C | 1 |
| 17 | 0.867773 | C | 1 |
| 19 | 0.725467 | C | 1 |
| 17 | 0.867773 | C | 1 |
| 12 | 0.665244 | C | 1 |
| 10 | 0.28943  | C | 1 |
| 10 | 0.28943  | C | 1 |
| 19 | 0.725467 | C | 1 |
| 1  | 0.082934 | C | 1 |
| 11 | 0.600533 | C | 1 |
| 10 | 0.28943  | C | 1 |

|    |          |   |   |
|----|----------|---|---|
| 1  | 0.082934 | C | 1 |
| 10 | 0.28943  | C | 1 |
| 10 | 0.28943  | C | 1 |
| 17 | 0.867773 | C | 1 |
| 10 | 0.28943  | C | 1 |
| 12 | 0.665244 | C | 1 |
| 10 | 0.28943  | C | 1 |
| 12 | 0.665244 | C | 1 |
| 10 | 0.28943  | C | 1 |
| 12 | 0.665244 | C | 1 |
| 11 | 0.600533 | C | 1 |
| 19 | 0.725467 | C | 1 |
| 12 | 0.665244 | C | 1 |
| 12 | 0.665244 | C | 1 |
| 19 | 0.725467 | C | 1 |
| 12 | 0.665244 | C | 1 |
| 16 | 0.829324 | C | 1 |
| 16 | 0.829324 | C | 1 |
| 16 | 0.829324 | C | 1 |
| 16 | 0.829324 | C | 1 |
| 16 | 0.829324 | C | 1 |
| 8  | 0.381362 | C | 1 |
| 5  | 0.244103 | C | 1 |
| 8  | 0.176711 | C | 1 |
| 5  | 0.195914 | C | 1 |
| 4  | 0.558817 | C | 1 |
| 1  | 0.230135 | C | 1 |
| 14 | 0.195152 | C | 1 |
| 5  | 0.244103 | C | 1 |
| 1  | 0.101778 | C | 1 |
| 8  | 0.381362 | C | 1 |
| 9  | 0.473602 | C | 1 |
| 16 | 0.593356 | C | 1 |
| 4  | 0.537871 | C | 1 |
| 14 | 0.195152 | C | 1 |
| 8  | 0.104674 | L | 0 |
| 12 | 0.414107 | C | 1 |
| 8  | 0.176711 | C | 1 |
| 1  | 0.101778 | C | 1 |
| 16 | 0.593356 | C | 1 |
| 18 | 0.443767 | C | 1 |
| 18 | 0.443767 | C | 1 |
| 7  | 0.415804 | C | 1 |
| 16 | 0.593356 | C | 1 |
| 5  | 0.365404 | C | 1 |
| 5  | 0.365404 | C | 1 |
| 9  | 0.473602 | C | 1 |
| 9  | 0.473602 | C | 1 |
| 8  | 0.176711 | C | 1 |
| 14 | 0.195152 | C | 1 |
| 5  | 0.365404 | C | 1 |
| 4  | 0.537871 | C | 1 |
| 12 | 0.414107 | C | 1 |
| 1  | 0.101778 | C | 1 |



|    |          |   |   |
|----|----------|---|---|
| 1  | 0.230135 | C | 1 |
| 8  | 0.381362 | C | 1 |
| 5  | 0.365404 | C | 1 |
| 4  | 0.537871 | C | 1 |
| 5  | 0.365404 | C | 1 |
| 14 | 0.195152 | C | 1 |
| 7  | 0.415804 | C | 1 |
| 5  | 0.365404 | C | 1 |
| 5  | 0.365404 | C | 1 |
| 4  | 0.537871 | C | 1 |
| 9  | 0.473602 | C | 1 |
| 4  | 0.17194  | C | 1 |
| 7  | 0.415804 | C | 1 |
| 4  | 0.17194  | C | 1 |
| 8  | 0.381362 | C | 1 |
| 3  | 0.13897  | C | 1 |
| 4  | 0.558817 | C | 1 |
| 4  | 0.537871 | C | 1 |
| 3  | 0.13897  | C | 1 |
| 5  | 0.244103 | C | 1 |
| 4  | 0.17194  | C | 1 |
| 3  | 0.13897  | C | 1 |
| 5  | 0.365404 | C | 1 |
| 4  | 0.537871 | C | 1 |
| 18 | 0.443767 | C | 1 |
| 15 | 0.508123 | C | 1 |
| 16 | 0.593356 | C | 1 |
| 4  | 0.537871 | C | 1 |
| 14 | 0.195152 | C | 1 |
| 5  | 0.365404 | C | 1 |
| 7  | 0.415804 | C | 1 |
| 4  | 0.17194  | C | 1 |
| 3  | 0.13897  | C | 1 |
| 14 | 0.195152 | C | 1 |
| 9  | 0.473602 | C | 1 |
| 4  | 0.537871 | C | 1 |
| 4  | 0.537871 | C | 1 |
| 8  | 0.104674 | L | 0 |
| 5  | 0.365404 | C | 1 |
| 14 | 0.195152 | C | 1 |
| 5  | 0.244103 | C | 1 |
| 4  | 0.558817 | C | 1 |
| 8  | 0.176711 | C | 1 |
| 4  | 0.537871 | C | 1 |
| 3  | 0.13897  | C | 1 |
| 14 | 0.195152 | C | 1 |
| 8  | 0.104674 | L | 0 |
| 4  | 0.537871 | C | 1 |
| 5  | 0.195914 | C | 1 |
| 12 | 0.414107 | C | 1 |
| 4  | 0.558817 | C | 1 |
| 8  | 0.104674 | L | 0 |
| 5  | 0.365404 | C | 1 |
| 7  | 0.415804 | C | 1 |



|    |          |   |   |
|----|----------|---|---|
| 8  | 0.252166 | C | 1 |
| 8  | 0.252166 | C | 1 |
| 11 | 0.197623 | C | 1 |
| 19 | 0.584694 | C | 1 |
| 18 | 0.382267 | C | 1 |
| 18 | 0.382267 | C | 1 |
| 18 | 0.382267 | C | 1 |
| 15 | 0.636522 | B | 1 |
| 11 | 0.197623 | C | 1 |
| 19 | 0.584694 | C | 1 |
| 11 | 0.197623 | C | 1 |
| 18 | 0.382267 | C | 1 |
| 18 | 0.382267 | C | 1 |
| 11 | 0.197623 | C | 1 |
| 18 | 0.382267 | C | 1 |
| 15 | 0.636522 | B | 1 |
| 11 | 0.197623 | C | 1 |
| 17 | 0.695064 | C | 1 |
| 15 | 0.636522 | B | 1 |
| 15 | 0.636522 | B | 1 |
| 17 | 0.695064 | C | 1 |
| 11 | 0.197623 | C | 1 |
| 15 | 0.636522 | B | 1 |
| 19 | 0.584694 | C | 1 |
| 18 | 0.382267 | C | 1 |
| 18 | 0.382267 | C | 1 |
| 17 | 0.695064 | C | 1 |
| 11 | 0.197623 | C | 1 |
| 17 | 0.695064 | C | 1 |
| 18 | 0.382267 | C | 1 |
| 17 | 0.695064 | C | 1 |
| 1  | 0.440414 | C | 1 |
| 18 | 0.865886 | C | 1 |
| 18 | 0.865886 | C | 1 |
| 1  | 0.440414 | C | 1 |
| 1  | 0.440414 | C | 1 |
| 18 | 0.865886 | C | 1 |
| 18 | 0.865886 | C | 1 |
| 18 | 0.865886 | C | 1 |
| 4  | 0.630997 | E | 1 |
| 4  | 0.583983 | C | 1 |
| 10 | 0.460496 | C | 1 |
| 8  | 0.427913 | C | 1 |
| 17 | 0.692674 | K | 1 |
| 8  | 0.427913 | C | 1 |
| 19 | 0.499979 | C | 1 |
| 19 | 0.499979 | C | 1 |
| 10 | 0.460496 | C | 1 |
| 9  | 0.816406 | E | 1 |
| 8  | 0.427913 | C | 1 |
| 3  | 0.068284 | C | 1 |
| 4  | 0.803465 | E | 1 |
| 10 | 0.460496 | C | 1 |
| 4  | 0.250171 | C | 1 |

|    |          |   |   |
|----|----------|---|---|
| 3  | 0.068284 | C | 1 |
| 17 | 0.526699 | C | 1 |
| 22 | 0.65148  | C | 1 |
| 5  | 0.068284 | C | 1 |
| 4  | 0.630997 | E | 1 |
| 9  | 0.816406 | E | 1 |
| 4  | 0.630997 | E | 1 |
| 10 | 0.460496 | C | 1 |
| 22 | 0.65148  | C | 1 |
| 17 | 0.692674 | K | 1 |
| 17 | 0.692674 | K | 1 |
| 22 | 0.65148  | C | 1 |
| 11 | 0.850784 | E | 1 |
| 8  | 0.313981 | G | 0 |
| 11 | 0.850784 | E | 1 |
| 19 | 0.499979 | C | 1 |
| 3  | 0.072894 | C | 1 |
| 4  | 0.803465 | E | 1 |
| 4  | 0.630997 | E | 1 |
| 17 | 0.526699 | C | 1 |
| 4  | 0.583983 | C | 1 |
| 4  | 0.250171 | C | 1 |
| 15 | 0.252362 | C | 1 |
| 15 | 0.299282 | C | 1 |
| 8  | 0.427913 | C | 1 |
| 10 | 0.460496 | C | 1 |
| 5  | 0.474464 | C | 1 |
| 8  | 0.507829 | C | 1 |
| 4  | 0.630997 | E | 1 |
| 8  | 0.242709 | L | 0 |
| 8  | 0.242709 | L | 0 |
| 8  | 0.507829 | C | 1 |
| 19 | 0.499979 | C | 1 |
| 15 | 0.252362 | C | 1 |
| 5  | 0.474464 | C | 1 |
| 15 | 0.252362 | C | 1 |
| 3  | 0.394524 | C | 1 |
| 22 | 0.65148  | C | 1 |
| 4  | 0.250171 | C | 1 |
| 9  | 0.816406 | E | 1 |
| 19 | 0.499979 | C | 1 |
| 3  | 0.068284 | C | 1 |
| 8  | 0.242709 | L | 0 |
| 1  | 0.190597 | C | 1 |
| 8  | 0.427913 | C | 1 |
| 8  | 0.407885 | L | 0 |
| 3  | 0.068284 | C | 1 |
| 19 | 0.499979 | C | 1 |
| 6  | 0.12212  | I | 0 |
| 15 | 0.299282 | C | 1 |
| 10 | 0.460496 | C | 1 |
| 4  | 0.803465 | E | 1 |
| 15 | 0.252362 | C | 1 |
| 5  | 0.182969 | C | 1 |

|    |          |   |   |
|----|----------|---|---|
| 1  | 0.53693  | C | 1 |
| 3  | 0.125977 | C | 1 |
| 8  | 0.407885 | L | 0 |
| 15 | 0.299282 | C | 1 |
| 8  | 0.242709 | L | 0 |
| 17 | 0.692674 | K | 1 |
| 5  | 0.288352 | G | 0 |
| 8  | 0.242709 | L | 0 |
| 8  | 0.427913 | C | 1 |
| 11 | 0.850784 | E | 1 |
| 10 | 0.460496 | C | 1 |
| 3  | 0.394524 | C | 1 |
| 3  | 0.394524 | C | 1 |
| 8  | 0.427913 | C | 1 |
| 15 | 0.252362 | C | 1 |
| 4  | 0.403468 | C | 1 |
| 15 | 0.299282 | C | 1 |
| 5  | 0.182969 | C | 1 |
| 5  | 0.288352 | G | 0 |
| 5  | 0.630003 | C | 1 |
| 17 | 0.526699 | C | 1 |
| 5  | 0.288352 | G | 0 |
| 4  | 0.250171 | C | 1 |
| 5  | 0.068284 | C | 1 |
| 3  | 0.394524 | C | 1 |
| 3  | 0.125977 | C | 1 |
| 8  | 0.313981 | G | 0 |
| 8  | 0.427913 | C | 1 |
| 19 | 0.499979 | C | 1 |
| 8  | 0.313981 | G | 0 |
| 17 | 0.692674 | K | 1 |
| 15 | 0.252362 | C | 1 |
| 3  | 0.068284 | C | 1 |
| 15 | 0.299282 | C | 1 |
| 4  | 0.630997 | E | 1 |
| 15 | 0.252362 | C | 1 |
| 11 | 0.283547 | C | 1 |
| 3  | 0.125977 | C | 1 |
| 1  | 0.53693  | C | 1 |
| 8  | 0.407885 | L | 0 |
| 11 | 0.283547 | C | 1 |
| 5  | 0.474464 | C | 1 |
| 4  | 0.250171 | C | 1 |
| 5  | 0.182969 | C | 1 |
| 17 | 0.526699 | C | 1 |
| 3  | 0.394524 | C | 1 |
| 8  | 0.507829 | C | 1 |
| 8  | 0.507829 | C | 1 |
| 10 | 0.460496 | C | 1 |
| 17 | 0.526699 | C | 1 |
| 8  | 0.313981 | G | 0 |
| 15 | 0.252362 | C | 1 |
| 8  | 0.507829 | C | 1 |
| 19 | 0.499979 | C | 1 |

|    |          |   |   |
|----|----------|---|---|
| 17 | 0.692674 | K | 1 |
| 4  | 0.803465 | E | 1 |
| 4  | 0.403468 | C | 1 |
| 15 | 0.252362 | C | 1 |
| 6  | 0.12212  | I | 0 |
| 5  | 0.630003 | C | 1 |
| 8  | 0.507829 | C | 1 |
| 15 | 0.252362 | C | 1 |
| 15 | 0.252362 | C | 1 |
| 5  | 0.630003 | C | 1 |
| 10 | 0.460496 | C | 1 |
| 4  | 0.583983 | C | 1 |
| 5  | 0.630003 | C | 1 |
| 3  | 0.394524 | C | 1 |
| 3  | 0.072894 | C | 1 |
| 1  | 0.190597 | C | 1 |
| 4  | 0.583983 | C | 1 |
| 10 | 0.460496 | C | 1 |
| 11 | 0.283547 | C | 1 |
| 1  | 0.53693  | C | 1 |
| 10 | 0.460496 | C | 1 |
| 5  | 0.474464 | C | 1 |
| 6  | 0.12212  | I | 0 |
| 4  | 0.583983 | C | 1 |
| 17 | 0.692674 | K | 1 |
| 5  | 0.068284 | C | 1 |
| 9  | 0.816406 | E | 1 |
| 10 | 0.460496 | C | 1 |
| 15 | 0.252362 | C | 1 |
| 4  | 0.803465 | E | 1 |
| 22 | 0.65148  | C | 1 |
| 15 | 0.252362 | C | 1 |
| 5  | 0.630003 | C | 1 |
| 17 | 0.692674 | K | 1 |
| 4  | 0.583983 | C | 1 |
| 11 | 0.283547 | C | 1 |
| 11 | 0.283547 | C | 1 |
| 15 | 0.252362 | C | 1 |
| 15 | 0.252362 | C | 1 |
| 4  | 0.403468 | C | 1 |
| 11 | 0.850784 | E | 1 |
| 1  | 0.190597 | C | 1 |
| 6  | 0.12212  | I | 0 |
| 17 | 0.526699 | C | 1 |
| 3  | 0.072894 | C | 1 |
| 12 | 0.590967 | C | 1 |
| 1  | 0.190597 | C | 1 |
| 8  | 0.507829 | C | 1 |
| 6  | 0.12212  | I | 0 |
| 8  | 0.313981 | G | 0 |
| 8  | 0.407885 | L | 0 |
| 11 | 0.283547 | C | 1 |
| 4  | 0.803465 | E | 1 |
| 4  | 0.803465 | E | 1 |

|    |          |   |   |
|----|----------|---|---|
| 8  | 0.313981 | G | 0 |
| 17 | 0.526699 | C | 1 |
| 11 | 0.283547 | C | 1 |
| 1  | 0.190597 | C | 1 |
| 11 | 0.850784 | E | 1 |
| 3  | 0.072894 | C | 1 |
| 5  | 0.068284 | C | 1 |
| 19 | 0.499979 | C | 1 |
| 5  | 0.474464 | C | 1 |
| 17 | 0.526699 | C | 1 |
| 5  | 0.068284 | C | 1 |
| 17 | 0.692674 | K | 1 |
| 1  | 0.53693  | C | 1 |
| 8  | 0.427913 | C | 1 |
| 9  | 0.816406 | E | 1 |
| 11 | 0.283547 | C | 1 |
| 3  | 0.068284 | C | 1 |
| 8  | 0.407885 | L | 0 |
| 3  | 0.068284 | C | 1 |
| 5  | 0.474464 | C | 1 |
| 4  | 0.803465 | E | 1 |
| 5  | 0.474464 | C | 1 |
| 5  | 0.474464 | C | 1 |
| 5  | 0.474464 | C | 1 |
| 3  | 0.068284 | C | 1 |
| 5  | 0.474464 | C | 1 |
| 17 | 0.692674 | K | 1 |
| 12 | 0.590967 | C | 1 |
| 5  | 0.182969 | C | 1 |
| 3  | 0.072894 | C | 1 |
| 8  | 0.427913 | C | 1 |
| 5  | 0.630003 | C | 1 |
| 11 | 0.283547 | C | 1 |
| 5  | 0.182969 | C | 1 |
| 15 | 0.252362 | C | 1 |
| 3  | 0.068284 | C | 1 |
| 15 | 0.252362 | C | 1 |
| 8  | 0.242709 | L | 0 |
| 12 | 0.590967 | C | 1 |
| 4  | 0.403468 | C | 1 |
| 10 | 0.460496 | C | 1 |
| 4  | 0.403468 | C | 1 |
| 6  | 0.12212  | I | 0 |
| 15 | 0.299282 | C | 1 |
| 5  | 0.288352 | G | 0 |
| 15 | 0.252362 | C | 1 |
| 3  | 0.394524 | C | 1 |
| 5  | 0.288352 | G | 0 |
| 11 | 0.850784 | E | 1 |
| 4  | 0.583983 | C | 1 |
| 12 | 0.590967 | C | 1 |
| 17 | 0.526699 | C | 1 |
| 15 | 0.299282 | C | 1 |
| 19 | 0.499979 | C | 1 |

|    |          |   |   |
|----|----------|---|---|
| 6  | 0.12212  | I | 0 |
| 8  | 0.427913 | C | 1 |
| 12 | 0.590967 | C | 1 |
| 1  | 0.53693  | C | 1 |
| 4  | 0.583983 | C | 1 |
| 5  | 0.068284 | C | 1 |
| 10 | 0.460496 | C | 1 |
| 22 | 0.65148  | C | 1 |
| 4  | 0.403468 | C | 1 |
| 5  | 0.474464 | C | 1 |
| 4  | 0.630997 | E | 1 |
| 11 | 0.850784 | E | 1 |
| 12 | 0.590967 | C | 1 |
| 10 | 0.460496 | C | 1 |
| 5  | 0.525351 | C | 1 |
| 5  | 0.525351 | C | 1 |
| 5  | 0.525351 | C | 1 |
| 5  | 0.525351 | C | 1 |
| 5  | 0.525351 | C | 1 |
| 5  | 0.525351 | C | 1 |
| 5  | 0.525351 | C | 1 |
| 17 | 0.366515 | C | 1 |
| 5  | 0.525351 | C | 1 |
| 17 | 0.366515 | C | 1 |
| 5  | 0.525351 | C | 1 |
| 5  | 0.525351 | C | 1 |
| 17 | 0.366515 | C | 1 |
| 5  | 0.525351 | C | 1 |
| 4  | 0.570079 | C | 1 |
| 4  | 0.570079 | C | 1 |
| 14 | 0.831965 | C | 1 |
| 16 | 0.628607 | D | 1 |
| 4  | 0.570079 | C | 1 |
| 16 | 0.628607 | D | 1 |
| 16 | 0.628607 | D | 1 |
| 4  | 0.570079 | C | 1 |
| 4  | 0.570079 | C | 1 |
| 16 | 0.628607 | D | 1 |
| 14 | 0.831965 | C | 1 |
| 4  | 0.570079 | C | 1 |
| 4  | 0.570079 | C | 1 |
| 4  | 0.570079 | C | 1 |
| 4  | 0.570079 | C | 1 |
| 16 | 0.628607 | D | 1 |
| 4  | 0.570079 | C | 1 |
| 16 | 0.628607 | D | 1 |
| 4  | 0.570079 | C | 1 |
| 16 | 0.628607 | D | 1 |
| 14 | 0.831965 | C | 1 |
| 17 | 0.192124 | C | 1 |
| 17 | 0.192124 | C | 1 |
| 17 | 0.15608  | C | 1 |
| 17 | 0.15608  | C | 1 |
| 17 | 0.15608  | C | 1 |
| 17 | 0.192124 | C | 1 |



|    |          |   |   |
|----|----------|---|---|
| 5  | 0.675561 | C | 1 |
| 5  | 0.675561 | C | 1 |
| 17 | 0.15608  | C | 1 |
| 17 | 0.15608  | C | 1 |
| 5  | 0.675561 | C | 1 |
| 17 | 0.15608  | C | 1 |
| 5  | 0.675561 | C | 1 |
| 17 | 0.15608  | C | 1 |
| 17 | 0.15608  | C | 1 |
| 5  | 0.675561 | C | 1 |
| 17 | 0.15608  | C | 1 |
| 17 | 0.15608  | C | 1 |
| 5  | 0.675561 | C | 1 |
| 5  | 0.675561 | C | 1 |
| 19 | 0.798186 | C | 1 |
| 16 | 0.717265 | C | 1 |
| 19 | 0.798186 | C | 1 |
| 16 | 0.717265 | C | 1 |
| 16 | 0.717265 | C | 1 |
| 17 | 0.603521 | N | 0 |
| 19 | 0.798186 | C | 1 |
| 16 | 0.717265 | C | 1 |
| 19 | 0.798186 | C | 1 |
| 17 | 0.603521 | N | 0 |
| 15 | 0.472739 | C | 1 |
| 17 | 0.603521 | N | 0 |
| 19 | 0.798186 | C | 1 |
| 16 | 0.717265 | C | 1 |
| 15 | 0.472739 | C | 1 |
| 16 | 0.717265 | C | 1 |
| 19 | 0.798186 | C | 1 |
| 19 | 0.798186 | C | 1 |
| 19 | 0.798186 | C | 1 |
| 15 | 0.472739 | C | 1 |
| 16 | 0.717265 | C | 1 |
| 15 | 0.472739 | C | 1 |
| 16 | 0.717265 | C | 1 |
| 15 | 0.472739 | C | 1 |
| 19 | 0.798186 | C | 1 |
| 19 | 0.798186 | C | 1 |
| 17 | 0.603521 | N | 0 |
| 17 | 0.603521 | N | 0 |
| 17 | 0.603521 | N | 0 |
| 16 | 0.717265 | C | 1 |
| 16 | 0.717265 | C | 1 |
| 15 | 0.472739 | C | 1 |
| 17 | 0.603521 | N | 0 |
| 19 | 0.798186 | C | 1 |
| 16 | 0.717265 | C | 1 |
| 17 | 0.603521 | N | 0 |
| 15 | 0.472739 | C | 1 |
| 15 | 0.472739 | C | 1 |
| 19 | 0.798186 | C | 1 |
| 17 | 0.603521 | N | 0 |



|    |          |   |   |
|----|----------|---|---|
| 6  | 0.322467 | C | 1 |
| 6  | 0.322467 | C | 1 |
| 4  | 0.100401 | C | 1 |
| 4  | 0.100401 | C | 1 |
| 4  | 0.100401 | C | 1 |
| 4  | 0.100401 | C | 1 |
| 4  | 0.100401 | C | 1 |
| 6  | 0.322467 | C | 1 |
| 16 | 0.346886 | C | 1 |
| 16 | 0.346886 | C | 1 |
| 18 | 0.132886 | C | 1 |
| 11 | 0.664003 | C | 1 |
| 11 | 0.664003 | C | 1 |
| 6  | 0.119378 | C | 1 |
| 11 | 0.664003 | C | 1 |
| 16 | 0.346886 | C | 1 |
| 4  | 0.26968  | N | 0 |
| 4  | 0.26968  | N | 0 |
| 4  | 0.26968  | N | 0 |
| 11 | 0.664003 | C | 1 |
| 16 | 0.346886 | C | 1 |
| 11 | 0.664003 | C | 1 |
| 16 | 0.346886 | C | 1 |
| 11 | 0.664003 | C | 1 |
| 18 | 0.132886 | C | 1 |
| 16 | 0.346886 | C | 1 |
| 16 | 0.346886 | C | 1 |
| 11 | 0.664003 | C | 1 |
| 16 | 0.346886 | C | 1 |
| 11 | 0.664003 | C | 1 |
| 18 | 0.132886 | C | 1 |
| 4  | 0.26968  | N | 0 |
| 16 | 0.346886 | C | 1 |
| 11 | 0.664003 | C | 1 |
| 18 | 0.132886 | C | 1 |
| 16 | 0.346886 | C | 1 |
| 16 | 0.346886 | C | 1 |
| 11 | 0.664003 | C | 1 |
| 4  | 0.26968  | N | 0 |
| 4  | 0.26968  | N | 0 |
| 11 | 0.664003 | C | 1 |
| 6  | 0.119378 | C | 1 |
| 16 | 0.346886 | C | 1 |
| 18 | 0.132886 | C | 1 |
| 6  | 0.119378 | C | 1 |
| 5  | 0.214847 | C | 1 |
| 1  | 0.230263 | C | 1 |
| 4  | 0.25426  | C | 1 |
| 4  | 0.190132 | C | 1 |
| 4  | 0.190132 | C | 1 |
| 4  | 0.319927 | C | 1 |
| 4  | 0.420235 | N | 0 |
| 4  | 0.319927 | C | 1 |
| 4  | 0.25426  | C | 1 |

|    |          |   |   |
|----|----------|---|---|
| 4  | 0.319927 | C | 1 |
| 4  | 0.381957 | C | 1 |
| 4  | 0.420235 | N | 0 |
| 5  | 0.092696 | C | 1 |
| 19 | 0.370253 | F | 0 |
| 4  | 0.190132 | C | 1 |
| 1  | 0.183614 | C | 1 |
| 4  | 0.25426  | C | 1 |
| 4  | 0.25426  | C | 1 |
| 5  | 0.214847 | C | 1 |
| 4  | 0.420235 | N | 0 |
| 5  | 0.665797 | C | 1 |
| 4  | 0.076598 | C | 1 |
| 21 | 0.374924 | C | 1 |
| 21 | 0.374924 | C | 1 |
| 1  | 0.230263 | C | 1 |
| 4  | 0.332806 | C | 1 |
| 1  | 0.183614 | C | 1 |
| 4  | 0.381957 | C | 1 |
| 5  | 0.092696 | C | 1 |
| 1  | 0.230263 | C | 1 |
| 5  | 0.092696 | C | 1 |
| 13 | 0.620545 | K | 1 |
| 1  | 0.230263 | C | 1 |
| 4  | 0.191799 | C | 1 |
| 13 | 0.620545 | K | 1 |
| 19 | 0.370253 | F | 0 |
| 21 | 0.374924 | C | 1 |
| 4  | 0.191799 | C | 1 |
| 4  | 0.190132 | C | 1 |
| 6  | 0.578397 | C | 1 |
| 4  | 0.319927 | C | 1 |
| 4  | 0.381957 | C | 1 |
| 4  | 0.25426  | C | 1 |
| 6  | 0.578397 | C | 1 |
| 13 | 0.620545 | K | 1 |
| 4  | 0.332806 | C | 1 |
| 4  | 0.25426  | C | 1 |
| 4  | 0.191799 | C | 1 |
| 4  | 0.319927 | C | 1 |
| 4  | 0.332806 | C | 1 |
| 3  | 0.068284 | C | 1 |
| 1  | 0.230263 | C | 1 |
| 4  | 0.190132 | C | 1 |
| 5  | 0.214847 | C | 1 |
| 3  | 0.068284 | C | 1 |
| 6  | 0.578397 | C | 1 |
| 6  | 0.578397 | C | 1 |
| 5  | 0.092696 | C | 1 |
| 4  | 0.420235 | N | 0 |
| 6  | 0.578397 | C | 1 |
| 6  | 0.578397 | C | 1 |
| 5  | 0.092696 | C | 1 |
| 6  | 0.578397 | C | 1 |

|    |          |   |   |
|----|----------|---|---|
| 5  | 0.665797 | C | 1 |
| 5  | 0.214847 | C | 1 |
| 4  | 0.190132 | C | 1 |
| 5  | 0.665797 | C | 1 |
| 5  | 0.665797 | C | 1 |
| 19 | 0.370253 | F | 0 |
| 4  | 0.332806 | C | 1 |
| 4  | 0.332806 | C | 1 |
| 4  | 0.420235 | N | 0 |
| 4  | 0.190132 | C | 1 |
| 5  | 0.665797 | C | 1 |
| 5  | 0.214847 | C | 1 |
| 5  | 0.665797 | C | 1 |
| 5  | 0.214847 | C | 1 |
| 4  | 0.332806 | C | 1 |
| 1  | 0.230263 | C | 1 |
| 4  | 0.420235 | N | 0 |
| 1  | 0.183614 | C | 1 |
| 21 | 0.374924 | C | 1 |
| 19 | 0.370253 | F | 0 |
| 4  | 0.076598 | C | 1 |
| 3  | 0.068284 | C | 1 |
| 21 | 0.374924 | C | 1 |
| 4  | 0.319927 | C | 1 |
| 4  | 0.319927 | C | 1 |
| 4  | 0.25426  | C | 1 |
| 19 | 0.370253 | F | 0 |
| 4  | 0.420235 | N | 0 |
| 5  | 0.665797 | C | 1 |
| 4  | 0.420235 | N | 0 |
| 4  | 0.076598 | C | 1 |
| 17 | 0.502307 | C | 1 |
| 17 | 0.502307 | C | 1 |
| 17 | 0.502307 | C | 1 |
| 17 | 0.502307 | C | 1 |
| 17 | 0.502307 | C | 1 |
| 17 | 0.502307 | C | 1 |
| 10 | 0.537999 | C | 1 |
| 9  | 0.820096 | E | 1 |
| 19 | 0.28734  | C | 1 |
| 22 | 0.788377 | C | 1 |
| 8  | 0.381416 | C | 1 |
| 3  | 0.436259 | B | 1 |
| 9  | 0.376709 | C | 1 |
| 4  | 0.126345 | C | 1 |
| 4  | 0.126345 | C | 1 |
| 3  | 0.412835 | C | 1 |
| 8  | 0.580902 | C | 1 |
| 3  | 0.331371 | I | 0 |
| 19 | 0.28734  | C | 1 |
| 3  | 0.412835 | C | 1 |
| 6  | 0.377226 | C | 1 |
| 11 | 0.428716 | C | 1 |
| 9  | 0.376709 | C | 1 |

|    |          |   |   |
|----|----------|---|---|
| 3  | 0.161282 | D | 1 |
| 3  | 0.331371 | I | 0 |
| 19 | 0.28734  | C | 1 |
| 22 | 0.788377 | C | 1 |
| 5  | 0.237752 | C | 1 |
| 4  | 0.231838 | C | 1 |
| 8  | 0.176714 | C | 1 |
| 22 | 0.788377 | C | 1 |
| 3  | 0.436259 | B | 1 |
| 5  | 0.470705 | C | 1 |
| 4  | 0.476716 | C | 1 |
| 11 | 0.621166 | L | 0 |
| 6  | 0.353548 | C | 1 |
| 10 | 0.537999 | C | 1 |
| 4  | 0.476716 | C | 1 |
| 6  | 0.377226 | C | 1 |
| 17 | 0.267756 | C | 1 |
| 10 | 0.537999 | C | 1 |
| 3  | 0.161282 | D | 1 |
| 4  | 0.231838 | C | 1 |
| 8  | 0.176714 | C | 1 |
| 5  | 0.202109 | I | 0 |
| 3  | 0.21635  | C | 1 |
| 5  | 0.470705 | C | 1 |
| 3  | 0.412835 | C | 1 |
| 5  | 0.470705 | C | 1 |
| 5  | 0.297002 | C | 1 |
| 7  | 0.588995 | C | 1 |
| 6  | 0.377226 | C | 1 |
| 8  | 0.580902 | C | 1 |
| 8  | 0.285063 | C | 1 |
| 8  | 0.580902 | C | 1 |
| 4  | 0.231838 | C | 1 |
| 10 | 0.537999 | C | 1 |
| 10 | 0.537999 | C | 1 |
| 5  | 0.237752 | C | 1 |
| 11 | 0.362302 | C | 1 |
| 6  | 0.377226 | C | 1 |
| 10 | 0.537999 | C | 1 |
| 19 | 0.28734  | C | 1 |
| 3  | 0.412835 | C | 1 |
| 11 | 0.428716 | C | 1 |
| 5  | 0.656484 | L | 0 |
| 10 | 0.537999 | C | 1 |
| 10 | 0.537999 | C | 1 |
| 9  | 0.376709 | C | 1 |
| 9  | 0.820096 | E | 1 |
| 12 | 0.733836 | G | 0 |
| 1  | 0.267236 | C | 1 |
| 22 | 0.68796  | C | 1 |
| 5  | 0.590325 | C | 1 |
| 11 | 0.362302 | C | 1 |
| 5  | 0.237752 | C | 1 |
| 22 | 0.788377 | C | 1 |

|    |          |   |   |
|----|----------|---|---|
| 11 | 0.428716 | C | 1 |
| 3  | 0.161282 | D | 1 |
| 11 | 0.362302 | C | 1 |
| 4  | 0.23098  | C | 1 |
| 3  | 0.436259 | B | 1 |
| 22 | 0.788377 | C | 1 |
| 8  | 0.285063 | C | 1 |
| 8  | 0.381416 | C | 1 |
| 5  | 0.470705 | C | 1 |
| 3  | 0.161282 | D | 1 |
| 6  | 0.377226 | C | 1 |
| 12 | 0.733836 | G | 0 |
| 6  | 0.377226 | C | 1 |
| 3  | 0.412835 | C | 1 |
| 5  | 0.237752 | C | 1 |
| 6  | 0.377226 | C | 1 |
| 3  | 0.27142  | C | 1 |
| 5  | 0.590325 | C | 1 |
| 1  | 0.219918 | C | 1 |
| 9  | 0.820096 | E | 1 |
| 5  | 0.470705 | C | 1 |
| 6  | 0.377226 | C | 1 |
| 5  | 0.590325 | C | 1 |
| 3  | 0.412835 | C | 1 |
| 11 | 0.362302 | C | 1 |
| 3  | 0.340671 | E | 1 |
| 8  | 0.285063 | C | 1 |
| 8  | 0.285063 | C | 1 |
| 4  | 0.649788 | I | 0 |
| 4  | 0.23098  | C | 1 |
| 5  | 0.656484 | L | 0 |
| 4  | 0.126345 | C | 1 |
| 3  | 0.441247 | I | 0 |
| 12 | 0.733836 | G | 0 |
| 6  | 0.377226 | C | 1 |
| 12 | 0.733836 | G | 0 |
| 3  | 0.412835 | C | 1 |
| 4  | 0.126345 | C | 1 |
| 5  | 0.237752 | C | 1 |
| 8  | 0.580902 | C | 1 |
| 10 | 0.537999 | C | 1 |
| 8  | 0.580902 | C | 1 |
| 19 | 0.583877 | I | 0 |
| 19 | 0.28734  | C | 1 |
| 6  | 0.377226 | C | 1 |
| 5  | 0.237752 | C | 1 |
| 5  | 0.590325 | C | 1 |
| 4  | 0.23098  | C | 1 |
| 3  | 0.436259 | B | 1 |
| 22 | 0.788377 | C | 1 |
| 11 | 0.621166 | L | 0 |
| 11 | 0.428716 | C | 1 |
| 8  | 0.285063 | C | 1 |
| 5  | 0.297002 | C | 1 |

|    |          |   |   |
|----|----------|---|---|
| 4  | 0.23098  | C | 1 |
| 3  | 0.441247 | I | 0 |
| 22 | 0.68796  | C | 1 |
| 5  | 0.237752 | C | 1 |
| 11 | 0.621166 | L | 0 |
| 4  | 0.173057 | C | 1 |
| 17 | 0.267756 | C | 1 |
| 8  | 0.381416 | C | 1 |
| 6  | 0.377226 | C | 1 |
| 19 | 0.28734  | C | 1 |
| 5  | 0.202109 | I | 0 |
| 8  | 0.381416 | C | 1 |
| 8  | 0.381416 | C | 1 |
| 17 | 0.267756 | C | 1 |
| 3  | 0.27142  | C | 1 |
| 3  | 0.21635  | C | 1 |
| 4  | 0.476716 | C | 1 |
| 4  | 0.23098  | C | 1 |
| 3  | 0.412835 | C | 1 |
| 3  | 0.412835 | C | 1 |
| 4  | 0.173057 | C | 1 |
| 4  | 0.476716 | C | 1 |
| 6  | 0.377226 | C | 1 |
| 7  | 0.588995 | C | 1 |
| 8  | 0.176714 | C | 1 |
| 3  | 0.441247 | I | 0 |
| 3  | 0.331371 | I | 0 |
| 5  | 0.237752 | C | 1 |
| 3  | 0.21635  | C | 1 |
| 3  | 0.412835 | C | 1 |
| 5  | 0.590325 | C | 1 |
| 11 | 0.428716 | C | 1 |
| 11 | 0.362302 | C | 1 |
| 19 | 0.28734  | C | 1 |
| 11 | 0.428716 | C | 1 |
| 3  | 0.412835 | C | 1 |
| 6  | 0.353548 | C | 1 |
| 11 | 0.621166 | L | 0 |
| 3  | 0.161282 | D | 1 |
| 6  | 0.377226 | C | 1 |
| 19 | 0.28734  | C | 1 |
| 4  | 0.476716 | C | 1 |
| 3  | 0.331371 | I | 0 |
| 3  | 0.412835 | C | 1 |
| 8  | 0.580902 | C | 1 |
| 3  | 0.412835 | C | 1 |
| 4  | 0.476716 | C | 1 |
| 4  | 0.23098  | C | 1 |
| 3  | 0.412835 | C | 1 |
| 19 | 0.583877 | I | 0 |
| 6  | 0.353548 | C | 1 |
| 4  | 0.126345 | C | 1 |
| 11 | 0.428716 | C | 1 |
| 4  | 0.126345 | C | 1 |



|    |          |   |   |
|----|----------|---|---|
| 6  | 0.247034 | C | 1 |
| 4  | 0.126345 | C | 1 |
| 3  | 0.412835 | C | 1 |
| 6  | 0.377226 | C | 1 |
| 4  | 0.126345 | C | 1 |
| 6  | 0.377226 | C | 1 |
| 11 | 0.362302 | C | 1 |
| 11 | 0.362302 | C | 1 |
| 4  | 0.476716 | C | 1 |
| 9  | 0.376709 | C | 1 |
| 11 | 0.428716 | C | 1 |
| 3  | 0.331371 | I | 0 |
| 11 | 0.428716 | C | 1 |
| 5  | 0.297002 | C | 1 |
| 19 | 0.28734  | C | 1 |
| 6  | 0.247034 | C | 1 |
| 11 | 0.428716 | C | 1 |
| 4  | 0.23098  | C | 1 |
| 5  | 0.202109 | I | 0 |
| 3  | 0.412835 | C | 1 |
| 6  | 0.353548 | C | 1 |
| 3  | 0.412835 | C | 1 |
| 3  | 0.412835 | C | 1 |
| 5  | 0.590325 | C | 1 |
| 10 | 0.537999 | C | 1 |
| 3  | 0.412835 | C | 1 |
| 6  | 0.377226 | C | 1 |
| 3  | 0.436259 | B | 1 |
| 4  | 0.476716 | C | 1 |
| 6  | 0.247034 | C | 1 |
| 4  | 0.173057 | C | 1 |
| 8  | 0.381416 | C | 1 |
| 5  | 0.590325 | C | 1 |
| 19 | 0.28734  | C | 1 |
| 3  | 0.412835 | C | 1 |
| 11 | 0.428716 | C | 1 |
| 11 | 0.428716 | C | 1 |
| 3  | 0.331371 | I | 0 |
| 6  | 0.377226 | C | 1 |
| 5  | 0.297002 | C | 1 |
| 11 | 0.621166 | L | 0 |
| 5  | 0.297002 | C | 1 |
| 4  | 0.173057 | C | 1 |
| 11 | 0.362302 | C | 1 |
| 6  | 0.377226 | C | 1 |
| 3  | 0.412835 | C | 1 |
| 5  | 0.470705 | C | 1 |
| 3  | 0.436259 | B | 1 |
| 8  | 0.580902 | C | 1 |
| 3  | 0.412835 | C | 1 |
| 3  | 0.412835 | C | 1 |
| 4  | 0.126345 | C | 1 |
| 5  | 0.470705 | C | 1 |
| 3  | 0.27142  | C | 1 |

|    |          |   |   |
|----|----------|---|---|
| 4  | 0.649788 | I | 0 |
| 5  | 0.297002 | C | 1 |
| 3  | 0.161282 | D | 1 |
| 5  | 0.656484 | L | 0 |
| 7  | 0.588995 | C | 1 |
| 19 | 0.583877 | I | 0 |
| 12 | 0.733836 | G | 0 |
| 3  | 0.441247 | I | 0 |
| 1  | 0.267236 | C | 1 |
| 5  | 0.297002 | C | 1 |
| 5  | 0.590325 | C | 1 |
| 5  | 0.237752 | C | 1 |
| 3  | 0.513812 | C | 1 |
| 5  | 0.590325 | C | 1 |
| 5  | 0.202109 | I | 0 |
| 3  | 0.436259 | B | 1 |
| 6  | 0.377226 | C | 1 |
| 6  | 0.353548 | C | 1 |
| 9  | 0.376709 | C | 1 |
| 8  | 0.580902 | C | 1 |
| 5  | 0.590325 | C | 1 |
| 6  | 0.353548 | C | 1 |
| 11 | 0.621166 | L | 0 |
| 11 | 0.428716 | C | 1 |
| 4  | 0.173057 | C | 1 |
| 3  | 0.412835 | C | 1 |
| 22 | 0.788377 | C | 1 |
| 3  | 0.412835 | C | 1 |
| 5  | 0.470705 | C | 1 |
| 19 | 0.583877 | I | 0 |
| 3  | 0.340671 | E | 1 |
| 3  | 0.436259 | B | 1 |
| 3  | 0.412835 | C | 1 |
| 6  | 0.377226 | C | 1 |
| 3  | 0.412835 | C | 1 |
| 9  | 0.820096 | E | 1 |
| 3  | 0.513812 | C | 1 |
| 5  | 0.297002 | C | 1 |
| 1  | 0.219918 | C | 1 |
| 5  | 0.297002 | C | 1 |
| 5  | 0.297002 | C | 1 |
| 11 | 0.621166 | L | 0 |
| 1  | 0.267236 | C | 1 |
| 11 | 0.621166 | L | 0 |
| 4  | 0.649788 | I | 0 |
| 8  | 0.176714 | C | 1 |
| 6  | 0.377226 | C | 1 |
| 6  | 0.377226 | C | 1 |
| 3  | 0.436259 | B | 1 |
| 12 | 0.733836 | G | 0 |
| 6  | 0.377226 | C | 1 |
| 3  | 0.412835 | C | 1 |
| 6  | 0.353548 | C | 1 |
| 11 | 0.428716 | C | 1 |

|    |          |   |   |
|----|----------|---|---|
| 4  | 0.231838 | C | 1 |
| 11 | 0.428716 | C | 1 |
| 22 | 0.788377 | C | 1 |
| 11 | 0.621166 | L | 0 |
| 8  | 0.381416 | C | 1 |
| 10 | 0.537999 | C | 1 |
| 4  | 0.476716 | C | 1 |
| 1  | 0.267236 | C | 1 |
| 3  | 0.441247 | I | 0 |
| 6  | 0.353548 | C | 1 |
| 3  | 0.27142  | C | 1 |
| 3  | 0.412835 | C | 1 |
| 3  | 0.21635  | C | 1 |
| 9  | 0.820096 | E | 1 |
| 3  | 0.436259 | B | 1 |
| 6  | 0.377226 | C | 1 |
| 5  | 0.297002 | C | 1 |
| 4  | 0.173057 | C | 1 |
| 22 | 0.788377 | C | 1 |
| 3  | 0.340671 | E | 1 |
| 3  | 0.331371 | I | 0 |
| 11 | 0.362302 | C | 1 |
| 6  | 0.377226 | C | 1 |
| 4  | 0.126345 | C | 1 |
| 4  | 0.231838 | C | 1 |
| 1  | 0.219918 | C | 1 |
| 19 | 0.28734  | C | 1 |
| 4  | 0.476716 | C | 1 |
| 1  | 0.267236 | C | 1 |
| 9  | 0.820096 | E | 1 |
| 1  | 0.267236 | C | 1 |
| 4  | 0.231838 | C | 1 |
| 6  | 0.353548 | C | 1 |
| 5  | 0.297002 | C | 1 |
| 5  | 0.297002 | C | 1 |
| 8  | 0.176714 | C | 1 |
| 3  | 0.412835 | C | 1 |
| 1  | 0.267236 | C | 1 |
| 17 | 0.624744 | L | 0 |
| 11 | 0.362302 | C | 1 |
| 3  | 0.412835 | C | 1 |
| 5  | 0.590325 | C | 1 |
| 4  | 0.23098  | C | 1 |
| 19 | 0.583877 | I | 0 |
| 5  | 0.297002 | C | 1 |
| 19 | 0.583877 | I | 0 |
| 22 | 0.68796  | C | 1 |
| 3  | 0.161282 | D | 1 |
| 6  | 0.353548 | C | 1 |
| 11 | 0.362302 | C | 1 |
| 17 | 0.267756 | C | 1 |
| 3  | 0.441247 | I | 0 |
| 8  | 0.381416 | C | 1 |
| 11 | 0.362302 | C | 1 |

|    |          |   |   |
|----|----------|---|---|
| 17 | 0.624744 | L | 0 |
| 3  | 0.21635  | C | 1 |
| 6  | 0.377226 | C | 1 |
| 19 | 0.28734  | C | 1 |
| 3  | 0.331371 | I | 0 |
| 8  | 0.176714 | C | 1 |
| 5  | 0.297002 | C | 1 |
| 3  | 0.340671 | E | 1 |
| 3  | 0.412835 | C | 1 |
| 7  | 0.588995 | C | 1 |
| 6  | 0.377226 | C | 1 |
| 9  | 0.376709 | C | 1 |
| 6  | 0.377226 | C | 1 |
| 6  | 0.377226 | C | 1 |
| 3  | 0.340671 | E | 1 |
| 4  | 0.649788 | I | 0 |
| 4  | 0.173057 | C | 1 |
| 4  | 0.649788 | I | 0 |
| 22 | 0.68796  | C | 1 |
| 4  | 0.126345 | C | 1 |
| 5  | 0.237752 | C | 1 |
| 5  | 0.590325 | C | 1 |
| 12 | 0.733836 | G | 0 |
| 5  | 0.590325 | C | 1 |
| 12 | 0.733836 | G | 0 |
| 8  | 0.176714 | C | 1 |
| 3  | 0.441247 | I | 0 |
| 3  | 0.412835 | C | 1 |
| 5  | 0.297002 | C | 1 |
| 8  | 0.285063 | C | 1 |
| 8  | 0.381416 | C | 1 |
| 5  | 0.297002 | C | 1 |
| 22 | 0.68796  | C | 1 |
| 19 | 0.583877 | I | 0 |
| 7  | 0.588995 | C | 1 |
| 6  | 0.377226 | C | 1 |
| 5  | 0.237752 | C | 1 |
| 1  | 0.267236 | C | 1 |
| 9  | 0.376709 | C | 1 |
| 4  | 0.126345 | C | 1 |
| 3  | 0.21635  | C | 1 |
| 3  | 0.513812 | C | 1 |
| 11 | 0.362302 | C | 1 |
| 11 | 0.621166 | L | 0 |
| 11 | 0.362302 | C | 1 |
| 5  | 0.590325 | C | 1 |
| 5  | 0.590325 | C | 1 |
| 5  | 0.237752 | C | 1 |
| 1  | 0.267236 | C | 1 |
| 3  | 0.513812 | C | 1 |
| 1  | 0.267236 | C | 1 |
| 6  | 0.377226 | C | 1 |
| 11 | 0.621166 | L | 0 |
| 5  | 0.590325 | C | 1 |

|    |          |   |   |
|----|----------|---|---|
| 22 | 0.788377 | C | 1 |
| 6  | 0.377226 | C | 1 |
| 3  | 0.161282 | D | 1 |
| 9  | 0.376709 | C | 1 |
| 5  | 0.590325 | C | 1 |
| 8  | 0.580902 | C | 1 |
| 3  | 0.412835 | C | 1 |
| 3  | 0.27142  | C | 1 |
| 3  | 0.436259 | B | 1 |
| 9  | 0.820096 | E | 1 |
| 17 | 0.624744 | L | 0 |
| 11 | 0.362302 | C | 1 |
| 3  | 0.340671 | E | 1 |
| 4  | 0.476716 | C | 1 |
| 9  | 0.376709 | C | 1 |
| 6  | 0.377226 | C | 1 |
| 8  | 0.285063 | C | 1 |
| 22 | 0.788377 | C | 1 |
| 11 | 0.362302 | C | 1 |
| 11 | 0.428716 | C | 1 |
| 8  | 0.381416 | C | 1 |
| 8  | 0.580902 | C | 1 |
| 3  | 0.21635  | C | 1 |
| 5  | 0.407483 | C | 1 |
| 5  | 0.407483 | C | 1 |
| 5  | 0.407483 | C | 1 |
| 5  | 0.407483 | C | 1 |
| 5  | 0.407483 | C | 1 |
| 5  | 0.407483 | C | 1 |
| 5  | 0.407483 | C | 1 |
| 5  | 0.407483 | C | 1 |
| 5  | 0.407483 | C | 1 |
| 5  | 0.407483 | C | 1 |
| 16 | 0.711657 | B | 1 |
| 16 | 0.711657 | B | 1 |
| 16 | 0.711657 | B | 1 |
| 5  | 0.297333 | C | 1 |
| 22 | 0.484045 | C | 1 |
| 22 | 0.484045 | C | 1 |
| 22 | 0.484045 | C | 1 |
| 22 | 0.484045 | C | 1 |
| 22 | 0.484045 | C | 1 |
| 22 | 0.484045 | C | 1 |
| 14 | 0.481793 | C | 1 |
| 14 | 0.481793 | C | 1 |
| 14 | 0.481793 | C | 1 |
| 14 | 0.481793 | C | 1 |
| 5  | 0.297333 | C | 1 |
| 22 | 0.484045 | C | 1 |
| 5  | 0.297333 | C | 1 |
| 14 | 0.481793 | C | 1 |
| 22 | 0.484045 | C | 1 |
| 22 | 0.484045 | C | 1 |
| 14 | 0.481793 | C | 1 |

|               |   |
|---------------|---|
| 5 0.179034 C  | 1 |
| 5 0.179034 C  | 1 |
| 5 0.179034 C  | 1 |
| 5 0.179034 C  | 1 |
| 5 0.179034 C  | 1 |
| 8 0.404013 B  | 1 |
| 8 0.404013 B  | 1 |
| 8 0.404013 B  | 1 |
| 8 0.404013 B  | 1 |
| 8 0.404013 B  | 1 |
| 8 0.404013 B  | 1 |
| 8 0.404013 B  | 1 |
| 8 0.404013 B  | 1 |
| 8 0.404013 B  | 1 |
| 8 0.404013 B  | 1 |
| 8 0.404013 B  | 1 |
| 8 0.404013 B  | 1 |
| 8 0.404013 B  | 1 |
| 8 0.404013 B  | 1 |
| 11 0.663286 C | 1 |
| 3 0.566486 C  | 1 |
| 6 0.287108 C  | 1 |
| 11 0.663286 C | 1 |
| 11 0.663286 C | 1 |
| 11 0.663286 C | 1 |
| 11 0.663286 C | 1 |
| 11 0.663286 C | 1 |
| 11 0.663286 C | 1 |
| 11 0.663286 C | 1 |
| 11 0.663286 C | 1 |
| 6 0.287108 C  | 1 |
| 3 0.566486 C  | 1 |
| 11 0.663286 C | 1 |
| 11 0.663286 C | 1 |
| 6 0.287108 C  | 1 |
| 11 0.663286 C | 1 |
| 11 0.663286 C | 1 |
| 11 0.663286 C | 1 |
| 4 0.482132 C  | 1 |
| 3 0.566486 C  | 1 |
| 11 0.663286 C | 1 |
| 11 0.663286 C | 1 |
| 11 0.663286 C | 1 |
| 3 0.566486 C  | 1 |
| 11 0.663286 C | 1 |
| 6 0.287108 C  | 1 |
| 11 0.663286 C | 1 |
| 11 0.663286 C | 1 |
| 4 0.482132 C  | 1 |
| 11 0.663286 C | 1 |
| 11 0.663286 C | 1 |
| 11 0.663286 C | 1 |
| 6 0.287108 C  | 1 |
| 11 0.663286 C | 1 |
| 11 0.663286 C | 1 |
| 11 0.663286 C | 1 |



|    |          |   |   |
|----|----------|---|---|
| 22 | 0.233003 | D | 1 |
| 7  | 0.181705 | I | 0 |
| 6  | 0.2633   | C | 1 |
| 20 | 0.517645 | C | 1 |
| 21 | 0.701407 | I | 0 |
| 20 | 0.721626 | C | 1 |
| 11 | 0.576054 | C | 1 |
| 5  | 0.50566  | C | 1 |
| 4  | 0.441469 | I | 0 |
| 7  | 0.616891 | D | 1 |
| 14 | 0.607568 | C | 1 |
| 6  | 0.622567 | C | 1 |
| 20 | 0.721626 | C | 1 |
| 5  | 0.525431 | C | 1 |
| 12 | 0.387144 | C | 1 |
| 8  | 0.403575 | C | 1 |
| 11 | 0.576054 | C | 1 |
| 5  | 0.347311 | C | 1 |
| 11 | 0.576054 | C | 1 |
| 17 | 0.369928 | C | 1 |
| 6  | 0.354844 | C | 1 |
| 11 | 0.174659 | C | 1 |
| 11 | 0.576054 | C | 1 |
| 4  | 0.651579 | C | 1 |
| 20 | 0.721626 | C | 1 |
| 11 | 0.576054 | C | 1 |
| 12 | 0.387144 | C | 1 |
| 11 | 0.174659 | C | 1 |
| 6  | 0.622567 | C | 1 |
| 6  | 0.354844 | C | 1 |
| 6  | 0.622567 | C | 1 |
| 8  | 0.403575 | C | 1 |
| 6  | 0.2633   | C | 1 |
| 17 | 0.369928 | C | 1 |
| 6  | 0.354844 | C | 1 |
| 5  | 0.50566  | C | 1 |
| 20 | 0.721626 | C | 1 |
| 1  | 0.568148 | C | 1 |
| 20 | 0.721626 | C | 1 |
| 7  | 0.451566 | I | 0 |
| 11 | 0.576054 | C | 1 |
| 1  | 0.214515 | I | 0 |
| 6  | 0.354844 | C | 1 |
| 21 | 0.701407 | I | 0 |
| 5  | 0.347311 | C | 1 |
| 20 | 0.517645 | C | 1 |
| 5  | 0.525431 | C | 1 |
| 12 | 0.387144 | C | 1 |
| 6  | 0.354844 | C | 1 |
| 14 | 0.607568 | C | 1 |
| 6  | 0.354844 | C | 1 |
| 4  | 0.651579 | C | 1 |
| 7  | 0.451566 | I | 0 |
| 20 | 0.517645 | C | 1 |



|    |          |   |   |
|----|----------|---|---|
| 5  | 0.525431 | C | 1 |
| 13 | 0.234023 | C | 1 |
| 16 | 0.910071 | C | 1 |
| 5  | 0.068401 | C | 1 |
| 22 | 0.233003 | D | 1 |
| 11 | 0.576054 | C | 1 |
| 11 | 0.576054 | C | 1 |
| 20 | 0.137367 | R | 0 |
| 4  | 0.651579 | C | 1 |
| 8  | 0.403575 | C | 1 |
| 4  | 0.651579 | C | 1 |
| 8  | 0.403575 | C | 1 |
| 7  | 0.616891 | D | 1 |
| 6  | 0.2633   | C | 1 |
| 4  | 0.441469 | I | 0 |
| 5  | 0.50566  | C | 1 |
| 16 | 0.910071 | C | 1 |
| 8  | 0.403575 | C | 1 |
| 11 | 0.576054 | C | 1 |
| 20 | 0.721626 | C | 1 |
| 8  | 0.403575 | C | 1 |
| 5  | 0.50566  | C | 1 |
| 4  | 0.651579 | C | 1 |
| 12 | 0.387144 | C | 1 |
| 6  | 0.2633   | C | 1 |
| 4  | 0.651579 | C | 1 |
| 7  | 0.616891 | D | 1 |
| 20 | 0.721626 | C | 1 |
| 22 | 0.233003 | D | 1 |
| 22 | 0.233003 | D | 1 |
| 14 | 0.607568 | C | 1 |
| 7  | 0.451566 | I | 0 |
| 17 | 0.369928 | C | 1 |
| 6  | 0.354844 | C | 1 |
| 17 | 0.369928 | C | 1 |
| 17 | 0.369928 | C | 1 |
| 13 | 0.234023 | C | 1 |
| 22 | 0.233003 | D | 1 |
| 8  | 0.403575 | C | 1 |
| 5  | 0.525431 | C | 1 |
| 3  | 0.254135 | C | 1 |
| 13 | 0.234023 | C | 1 |
| 12 | 0.387144 | C | 1 |
| 21 | 0.701407 | I | 0 |
| 5  | 0.347311 | C | 1 |
| 14 | 0.607568 | C | 1 |
| 5  | 0.50566  | C | 1 |
| 5  | 0.525431 | C | 1 |
| 4  | 0.651579 | C | 1 |
| 4  | 0.651579 | C | 1 |
| 20 | 0.721626 | C | 1 |
| 4  | 0.651579 | C | 1 |
| 3  | 0.254135 | C | 1 |
| 14 | 0.24395  | C | 1 |

|    |          |   |   |
|----|----------|---|---|
| 5  | 0.50566  | C | 1 |
| 14 | 0.24395  | C | 1 |
| 4  | 0.441469 | I | 0 |
| 7  | 0.181705 | I | 0 |
| 3  | 0.254135 | C | 1 |
| 5  | 0.50566  | C | 1 |
| 20 | 0.137367 | R | 0 |
| 4  | 0.651579 | C | 1 |
| 5  | 0.50566  | C | 1 |
| 20 | 0.721626 | C | 1 |
| 6  | 0.622567 | C | 1 |
| 5  | 0.525431 | C | 1 |
| 5  | 0.525431 | C | 1 |
| 21 | 0.701407 | I | 0 |
| 20 | 0.721626 | C | 1 |
| 5  | 0.347311 | C | 1 |
| 3  | 0.254135 | C | 1 |
| 11 | 0.174659 | C | 1 |
| 7  | 0.181705 | I | 0 |
| 5  | 0.068401 | C | 1 |
| 6  | 0.354844 | C | 1 |
| 20 | 0.137367 | R | 0 |
| 11 | 0.576054 | C | 1 |
| 8  | 0.403575 | C | 1 |
| 5  | 0.50566  | C | 1 |
| 5  | 0.50566  | C | 1 |
| 20 | 0.721626 | C | 1 |
| 5  | 0.50566  | C | 1 |
| 20 | 0.517645 | C | 1 |
| 11 | 0.174659 | C | 1 |
| 4  | 0.441469 | I | 0 |
| 5  | 0.50566  | C | 1 |
| 11 | 0.576054 | C | 1 |
| 4  | 0.441469 | I | 0 |
| 7  | 0.181705 | I | 0 |
| 11 | 0.576054 | C | 1 |
| 1  | 0.568148 | C | 1 |
| 4  | 0.651579 | C | 1 |
| 5  | 0.347311 | C | 1 |
| 20 | 0.721626 | C | 1 |
| 11 | 0.576054 | C | 1 |
| 20 | 0.137367 | R | 0 |
| 1  | 0.214515 | I | 0 |
| 21 | 0.701407 | I | 0 |
| 6  | 0.622567 | C | 1 |
| 5  | 0.50566  | C | 1 |
| 12 | 0.387144 | C | 1 |
| 14 | 0.607568 | C | 1 |
| 6  | 0.2633   | C | 1 |
| 4  | 0.441469 | I | 0 |
| 11 | 0.174659 | C | 1 |
| 20 | 0.517645 | C | 1 |
| 5  | 0.525431 | C | 1 |
| 17 | 0.369928 | C | 1 |

|    |          |   |   |
|----|----------|---|---|
| 16 | 0.910071 | C | 1 |
| 4  | 0.441469 | I | 0 |
| 8  | 0.403575 | C | 1 |
| 17 | 0.369928 | C | 1 |
| 5  | 0.50566  | C | 1 |
| 1  | 0.568148 | C | 1 |
| 6  | 0.354844 | C | 1 |
| 7  | 0.451566 | I | 0 |
| 7  | 0.451566 | I | 0 |
| 7  | 0.451566 | I | 0 |
| 5  | 0.50566  | C | 1 |
| 14 | 0.607568 | C | 1 |
| 22 | 0.233003 | D | 1 |
| 7  | 0.181705 | I | 0 |
| 7  | 0.181705 | I | 0 |
| 7  | 0.181705 | I | 0 |
| 3  | 0.254135 | C | 1 |
| 11 | 0.174659 | C | 1 |
| 16 | 0.910071 | C | 1 |
| 7  | 0.451566 | I | 0 |
| 16 | 0.910071 | C | 1 |
| 20 | 0.721626 | C | 1 |
| 8  | 0.403575 | C | 1 |
| 4  | 0.651579 | C | 1 |
| 20 | 0.137367 | R | 0 |
| 20 | 0.721626 | C | 1 |
| 14 | 0.24395  | C | 1 |
| 5  | 0.347311 | C | 1 |
| 20 | 0.517645 | C | 1 |
| 20 | 0.517645 | C | 1 |
| 20 | 0.721626 | C | 1 |
| 5  | 0.50566  | C | 1 |
| 5  | 0.068401 | C | 1 |
| 5  | 0.525431 | C | 1 |
| 20 | 0.721626 | C | 1 |
| 11 | 0.576054 | C | 1 |
| 5  | 0.50566  | C | 1 |
| 11 | 0.576054 | C | 1 |
| 11 | 0.174659 | C | 1 |
| 11 | 0.576054 | C | 1 |
| 20 | 0.721626 | C | 1 |
| 16 | 0.910071 | C | 1 |
| 20 | 0.137367 | R | 0 |
| 1  | 0.568148 | C | 1 |
| 13 | 0.234023 | C | 1 |
| 5  | 0.347311 | C | 1 |
| 12 | 0.387144 | C | 1 |
| 1  | 0.214515 | I | 0 |
| 13 | 0.234023 | C | 1 |
| 7  | 0.451566 | I | 0 |
| 5  | 0.50566  | C | 1 |
| 7  | 0.616891 | D | 1 |
| 4  | 0.441469 | I | 0 |
| 5  | 0.50566  | C | 1 |

|    |          |   |   |
|----|----------|---|---|
| 18 | 0.317129 | C | 1 |
| 18 | 0.317129 | C | 1 |
| 18 | 0.317129 | C | 1 |
| 3  | 0.128007 | C | 1 |
| 3  | 0.128007 | C | 1 |
| 3  | 0.128007 | C | 1 |
| 3  | 0.128007 | C | 1 |
| 3  | 0.128007 | C | 1 |
| 3  | 0.128007 | C | 1 |
| 15 | 0.852307 | C | 1 |
| 15 | 0.852307 | C | 1 |
| 15 | 0.852307 | C | 1 |
| 20 | 0.528908 | C | 1 |
| 20 | 0.528908 | C | 1 |
| 20 | 0.528908 | C | 1 |
| 20 | 0.528908 | C | 1 |
| 20 | 0.528908 | C | 1 |
| 20 | 0.528908 | C | 1 |
| 20 | 0.528908 | C | 1 |
| 20 | 0.528908 | C | 1 |
| 20 | 0.528908 | C | 1 |
| 20 | 0.528908 | C | 1 |
| 5  | 0.072293 | C | 1 |
| 5  | 0.068284 | C | 1 |
| 14 | 0.505621 | C | 1 |
| 5  | 0.068284 | C | 1 |
| 11 | 0.291431 | C | 1 |
| 14 | 0.505621 | C | 1 |
| 14 | 0.505621 | C | 1 |
| 14 | 0.505621 | C | 1 |
| 14 | 0.505621 | C | 1 |
| 5  | 0.072293 | C | 1 |
| 14 | 0.505621 | C | 1 |
| 14 | 0.505621 | C | 1 |
| 14 | 0.505621 | C | 1 |
| 11 | 0.291431 | C | 1 |
| 11 | 0.291431 | C | 1 |
| 11 | 0.291431 | C | 1 |
| 14 | 0.505621 | C | 1 |
| 5  | 0.068284 | C | 1 |
| 14 | 0.505621 | C | 1 |
| 5  | 0.072293 | C | 1 |
| 14 | 0.505621 | C | 1 |
| 11 | 0.291431 | C | 1 |
| 14 | 0.505621 | C | 1 |
| 11 | 0.068284 | C | 1 |
| 11 | 0.068284 | C | 1 |
| 16 | 0.494523 | C | 1 |
| 11 | 0.068284 | C | 1 |
| 11 | 0.068284 | C | 1 |
| 11 | 0.068284 | C | 1 |
| 16 | 0.494523 | C | 1 |
| 16 | 0.494523 | C | 1 |
| 11 | 0.068284 | C | 1 |

|    |          |   |   |
|----|----------|---|---|
| 5  | 0.680639 | C | 1 |
| 17 | 0.222287 | C | 1 |
| 18 | 0.470709 | C | 1 |
| 5  | 0.408265 | R | 0 |
| 16 | 0.614575 | C | 1 |
| 16 | 0.614575 | C | 1 |
| 15 | 0.64364  | C | 1 |
| 4  | 0.555464 | C | 1 |
| 5  | 0.680639 | C | 1 |
| 17 | 0.222287 | C | 1 |
| 4  | 0.794872 | C | 1 |
| 18 | 0.277251 | C | 1 |
| 15 | 0.64364  | C | 1 |
| 5  | 0.680639 | C | 1 |
| 11 | 0.564555 | C | 1 |
| 5  | 0.408265 | R | 0 |
| 4  | 0.366583 | C | 1 |
| 12 | 0.738282 | C | 1 |
| 4  | 0.136527 | C | 1 |
| 12 | 0.493966 | C | 1 |
| 18 | 0.277251 | C | 1 |
| 12 | 0.493966 | C | 1 |
| 16 | 0.517492 | C | 1 |
| 5  | 0.570581 | C | 1 |
| 11 | 0.564555 | C | 1 |
| 3  | 0.528305 | C | 1 |
| 12 | 0.738282 | C | 1 |
| 14 | 0.623515 | C | 1 |
| 11 | 0.564555 | C | 1 |
| 18 | 0.470709 | C | 1 |
| 3  | 0.293367 | C | 1 |
| 12 | 0.493966 | C | 1 |
| 5  | 0.680639 | C | 1 |
| 5  | 0.680639 | C | 1 |
| 4  | 0.794872 | C | 1 |
| 5  | 0.583511 | C | 1 |
| 3  | 0.281451 | C | 1 |
| 18 | 0.277251 | C | 1 |
| 15 | 0.64364  | C | 1 |
| 3  | 0.293367 | C | 1 |
| 18 | 0.470709 | C | 1 |
| 18 | 0.277251 | C | 1 |
| 5  | 0.408265 | R | 0 |
| 5  | 0.680639 | C | 1 |
| 4  | 0.136527 | C | 1 |
| 18 | 0.277251 | C | 1 |
| 18 | 0.470709 | C | 1 |
| 12 | 0.738282 | C | 1 |
| 4  | 0.555464 | C | 1 |
| 12 | 0.672208 | C | 1 |
| 12 | 0.672208 | C | 1 |
| 16 | 0.614575 | C | 1 |
| 18 | 0.470709 | C | 1 |
| 5  | 0.680639 | C | 1 |

|    |          |   |   |
|----|----------|---|---|
| 17 | 0.222287 | C | 1 |
| 18 | 0.470709 | C | 1 |
| 12 | 0.738282 | C | 1 |
| 4  | 0.366583 | C | 1 |
| 5  | 0.583511 | C | 1 |
| 18 | 0.277251 | C | 1 |
| 12 | 0.493966 | C | 1 |
| 12 | 0.118318 | C | 1 |
| 15 | 0.64364  | C | 1 |
| 4  | 0.794872 | C | 1 |
| 22 | 0.590335 | C | 1 |
| 18 | 0.277251 | C | 1 |
| 4  | 0.366583 | C | 1 |
| 12 | 0.493966 | C | 1 |
| 5  | 0.680639 | C | 1 |
| 22 | 0.590335 | C | 1 |
| 22 | 0.590335 | C | 1 |
| 12 | 0.738282 | C | 1 |
| 4  | 0.122925 | C | 1 |
| 12 | 0.672208 | C | 1 |
| 6  | 0.121371 | I | 0 |
| 3  | 0.281451 | C | 1 |
| 4  | 0.122925 | C | 1 |
| 4  | 0.136527 | C | 1 |
| 12 | 0.672208 | C | 1 |
| 3  | 0.528305 | C | 1 |
| 3  | 0.528305 | C | 1 |
| 3  | 0.528305 | C | 1 |
| 3  | 0.528305 | C | 1 |
| 3  | 0.377237 | C | 1 |
| 17 | 0.222287 | C | 1 |
| 15 | 0.64364  | C | 1 |
| 3  | 0.281451 | C | 1 |
| 11 | 0.564555 | C | 1 |
| 16 | 0.517492 | C | 1 |
| 18 | 0.470709 | C | 1 |
| 4  | 0.794872 | C | 1 |
| 4  | 0.555464 | C | 1 |
| 18 | 0.277251 | C | 1 |
| 12 | 0.738282 | C | 1 |
| 18 | 0.277251 | C | 1 |
| 17 | 0.222287 | C | 1 |
| 18 | 0.470709 | C | 1 |
| 16 | 0.614575 | C | 1 |
| 4  | 0.794872 | C | 1 |
| 6  | 0.121371 | I | 0 |
| 16 | 0.614575 | C | 1 |
| 5  | 0.680639 | C | 1 |
| 11 | 0.564555 | C | 1 |
| 6  | 0.121371 | I | 0 |
| 1  | 0.465402 | C | 1 |
| 5  | 0.408265 | R | 0 |
| 3  | 0.293367 | C | 1 |
| 17 | 0.222287 | C | 1 |

|    |          |   |   |
|----|----------|---|---|
| 5  | 0.680639 | C | 1 |
| 11 | 0.564555 | C | 1 |
| 5  | 0.583511 | C | 1 |
| 18 | 0.277251 | C | 1 |
| 5  | 0.680639 | C | 1 |
| 18 | 0.470709 | C | 1 |
| 11 | 0.564555 | C | 1 |
| 6  | 0.121371 | I | 0 |
| 12 | 0.738282 | C | 1 |
| 4  | 0.122925 | C | 1 |
| 17 | 0.222287 | C | 1 |
| 5  | 0.680639 | C | 1 |
| 5  | 0.570581 | C | 1 |
| 17 | 0.222287 | C | 1 |
| 1  | 0.211651 | C | 1 |
| 5  | 0.570581 | C | 1 |
| 5  | 0.680639 | C | 1 |
| 11 | 0.564555 | C | 1 |
| 17 | 0.222287 | C | 1 |
| 17 | 0.222287 | C | 1 |
| 15 | 0.64364  | C | 1 |
| 11 | 0.564555 | C | 1 |
| 11 | 0.564555 | C | 1 |
| 3  | 0.528305 | C | 1 |
| 11 | 0.564555 | C | 1 |
| 5  | 0.583511 | C | 1 |
| 4  | 0.794872 | C | 1 |
| 15 | 0.64364  | C | 1 |
| 11 | 0.564555 | C | 1 |
| 5  | 0.583511 | C | 1 |
| 11 | 0.564555 | C | 1 |
| 22 | 0.590335 | C | 1 |
| 18 | 0.470709 | C | 1 |
| 3  | 0.377237 | C | 1 |
| 1  | 0.465402 | C | 1 |
| 11 | 0.564555 | C | 1 |
| 3  | 0.528305 | C | 1 |
| 16 | 0.517492 | C | 1 |
| 4  | 0.555464 | C | 1 |
| 18 | 0.277251 | C | 1 |
| 22 | 0.590335 | C | 1 |
| 4  | 0.184282 | C | 1 |
| 18 | 0.277251 | C | 1 |
| 15 | 0.64364  | C | 1 |
| 1  | 0.211651 | C | 1 |
| 4  | 0.555464 | C | 1 |
| 1  | 0.211651 | C | 1 |
| 12 | 0.493966 | C | 1 |
| 4  | 0.794872 | C | 1 |
| 22 | 0.590335 | C | 1 |
| 4  | 0.794872 | C | 1 |
| 12 | 0.493966 | C | 1 |
| 17 | 0.222287 | C | 1 |
| 12 | 0.738282 | C | 1 |

|    |          |   |   |
|----|----------|---|---|
| 3  | 0.377237 | C | 1 |
| 17 | 0.222287 | C | 1 |
| 5  | 0.583511 | C | 1 |
| 5  | 0.583511 | C | 1 |
| 12 | 0.493966 | C | 1 |
| 17 | 0.222287 | C | 1 |
| 11 | 0.564555 | C | 1 |
| 5  | 0.583511 | C | 1 |
| 14 | 0.623515 | C | 1 |
| 12 | 0.672208 | C | 1 |
| 16 | 0.614575 | C | 1 |
| 5  | 0.238395 | C | 1 |
| 12 | 0.672208 | C | 1 |
| 12 | 0.672208 | C | 1 |
| 1  | 0.465402 | C | 1 |
| 12 | 0.118318 | C | 1 |
| 5  | 0.238395 | C | 1 |
| 5  | 0.680639 | C | 1 |
| 12 | 0.738282 | C | 1 |
| 14 | 0.623515 | C | 1 |
| 12 | 0.118318 | C | 1 |
| 4  | 0.184282 | C | 1 |
| 5  | 0.408265 | R | 0 |
| 5  | 0.570581 | C | 1 |
| 16 | 0.614575 | C | 1 |
| 5  | 0.238395 | C | 1 |
| 4  | 0.184282 | C | 1 |
| 5  | 0.570581 | C | 1 |
| 4  | 0.122925 | C | 1 |
| 5  | 0.583511 | C | 1 |
| 16 | 0.614575 | C | 1 |
| 3  | 0.377237 | C | 1 |
| 4  | 0.184282 | C | 1 |
| 12 | 0.118318 | C | 1 |
| 5  | 0.680639 | C | 1 |
| 15 | 0.64364  | C | 1 |
| 12 | 0.738282 | C | 1 |
| 11 | 0.564555 | C | 1 |
| 4  | 0.136527 | C | 1 |
| 5  | 0.680639 | C | 1 |
| 5  | 0.238395 | C | 1 |
| 1  | 0.465402 | C | 1 |
| 4  | 0.122925 | C | 1 |
| 3  | 0.377237 | C | 1 |
| 5  | 0.238395 | C | 1 |
| 17 | 0.222287 | C | 1 |
| 16 | 0.517492 | C | 1 |
| 5  | 0.680639 | C | 1 |
| 17 | 0.222287 | C | 1 |
| 16 | 0.517492 | C | 1 |
| 4  | 0.184282 | C | 1 |
| 4  | 0.122925 | C | 1 |
| 12 | 0.738282 | C | 1 |
| 12 | 0.493966 | C | 1 |



|    |          |   |   |
|----|----------|---|---|
| 5  | 0.680639 | C | 1 |
| 17 | 0.222287 | C | 1 |
| 12 | 0.738282 | C | 1 |
| 6  | 0.121371 | I | 0 |
| 12 | 0.118318 | C | 1 |
| 12 | 0.493966 | C | 1 |
| 11 | 0.564555 | C | 1 |
| 1  | 0.465402 | C | 1 |
| 5  | 0.570581 | C | 1 |
| 6  | 0.121371 | I | 0 |
| 12 | 0.672208 | C | 1 |
| 4  | 0.794872 | C | 1 |
| 4  | 0.136527 | C | 1 |
| 4  | 0.794872 | C | 1 |
| 16 | 0.614575 | C | 1 |
| 17 | 0.222287 | C | 1 |
| 22 | 0.590335 | C | 1 |
| 22 | 0.590335 | C | 1 |
| 16 | 0.614575 | C | 1 |
| 4  | 0.122925 | C | 1 |
| 18 | 0.895575 | C | 1 |
| 12 | 0.428502 | C | 1 |
| 5  | 0.516808 | C | 1 |
| 17 | 0.729198 | C | 1 |
| 16 | 0.450751 | I | 0 |
| 17 | 0.773096 | C | 1 |
| 15 | 0.325854 | C | 1 |
| 22 | 0.298748 | C | 1 |
| 15 | 0.684501 | C | 1 |
| 18 | 0.534644 | C | 1 |
| 5  | 0.516808 | C | 1 |
| 5  | 0.516808 | C | 1 |
| 15 | 0.684501 | C | 1 |
| 12 | 0.428502 | C | 1 |
| 12 | 0.428502 | C | 1 |
| 17 | 0.729198 | C | 1 |
| 16 | 0.450751 | I | 0 |
| 12 | 0.428502 | C | 1 |
| 16 | 0.450751 | I | 0 |
| 18 | 0.895575 | C | 1 |
| 9  | 0.497801 | N | 0 |
| 17 | 0.773096 | C | 1 |
| 18 | 0.534644 | C | 1 |
| 17 | 0.773096 | C | 1 |
| 5  | 0.516808 | C | 1 |
| 22 | 0.298748 | C | 1 |
| 17 | 0.773096 | C | 1 |
| 22 | 0.298748 | C | 1 |
| 18 | 0.895575 | C | 1 |
| 18 | 0.895575 | C | 1 |
| 12 | 0.428502 | C | 1 |
| 16 | 0.450751 | I | 0 |
| 7  | 0.365465 | C | 1 |
| 15 | 0.684501 | C | 1 |

|                |   |
|----------------|---|
| 5 0. 516808 C  | 1 |
| 15 0. 325854 C | 1 |
| 15 0. 325854 C | 1 |
| 16 0. 450751 I | 0 |
| 18 0. 895575 C | 1 |
| 15 0. 684501 C | 1 |
| 15 0. 325854 C | 1 |
| 22 0. 298748 C | 1 |
| 18 0. 895575 C | 1 |
| 18 0. 895575 C | 1 |
| 15 0. 684501 C | 1 |
| 16 0. 483835 C | 1 |
| 17 0. 729198 C | 1 |
| 5 0. 516808 C  | 1 |
| 9 0. 509648 C  | 1 |
| 16 0. 483835 C | 1 |
| 16 0. 450751 I | 0 |
| 12 0. 428502 C | 1 |
| 15 0. 684501 C | 1 |
| 16 0. 483835 C | 1 |
| 15 0. 684501 C | 1 |
| 15 0. 684501 C | 1 |
| 5 0. 516808 C  | 1 |
| 17 0. 729198 C | 1 |
| 16 0. 450751 I | 0 |
| 22 0. 298748 C | 1 |
| 9 0. 497801 N  | 0 |
| 17 0. 729198 C | 1 |
| 17 0. 729198 C | 1 |
| 9 0. 509648 C  | 1 |
| 17 0. 773096 C | 1 |
| 22 0. 298748 C | 1 |
| 17 0. 729198 C | 1 |
| 16 0. 483835 C | 1 |
| 17 0. 773096 C | 1 |
| 18 0. 534644 C | 1 |
| 15 0. 684501 C | 1 |
| 17 0. 729198 C | 1 |
| 5 0. 516808 C  | 1 |
| 12 0. 428502 C | 1 |
| 22 0. 298748 C | 1 |
| 17 0. 773096 C | 1 |
| 17 0. 729198 C | 1 |
| 17 0. 729198 C | 1 |
| 15 0. 325854 C | 1 |
| 17 0. 729198 C | 1 |
| 22 0. 298748 C | 1 |
| 16 0. 450751 I | 0 |
| 16 0. 450751 I | 0 |
| 18 0. 895575 C | 1 |
| 15 0. 325854 C | 1 |
| 15 0. 325854 C | 1 |
| 15 0. 325854 C | 1 |
| 22 0. 298748 C | 1 |

|    |          |   |   |
|----|----------|---|---|
| 17 | 0.729198 | C | 1 |
| 17 | 0.729198 | C | 1 |
| 15 | 0.684501 | C | 1 |
| 5  | 0.516808 | C | 1 |
| 16 | 0.450751 | I | 0 |
| 15 | 0.325854 | C | 1 |
| 18 | 0.895575 | C | 1 |
| 17 | 0.773096 | C | 1 |
| 18 | 0.895575 | C | 1 |
| 15 | 0.325854 | C | 1 |
| 18 | 0.895575 | C | 1 |
| 17 | 0.729198 | C | 1 |
| 16 | 0.483835 | C | 1 |
| 18 | 0.895575 | C | 1 |
| 15 | 0.325854 | C | 1 |
| 16 | 0.450751 | I | 0 |
| 9  | 0.497801 | N | 0 |
| 7  | 0.365465 | C | 1 |
| 18 | 0.534644 | C | 1 |
| 15 | 0.325854 | C | 1 |
| 5  | 0.516808 | C | 1 |
| 12 | 0.428502 | C | 1 |
| 9  | 0.509648 | C | 1 |
| 15 | 0.325854 | C | 1 |
| 5  | 0.516808 | C | 1 |
| 22 | 0.298748 | C | 1 |
| 18 | 0.534644 | C | 1 |
| 18 | 0.534644 | C | 1 |
| 17 | 0.773096 | C | 1 |
| 16 | 0.450751 | I | 0 |
| 17 | 0.773096 | C | 1 |
| 15 | 0.684501 | C | 1 |
| 7  | 0.365465 | C | 1 |
| 3  | 0.545356 | L | 0 |
| 1  | 0.220485 | C | 1 |
| 18 | 0.648887 | C | 1 |
| 18 | 0.648887 | C | 1 |
| 18 | 0.648887 | C | 1 |
| 18 | 0.648887 | C | 1 |
| 3  | 0.545356 | L | 0 |
| 18 | 0.648887 | C | 1 |
| 19 | 0.594021 | C | 1 |
| 19 | 0.594021 | C | 1 |
| 18 | 0.648887 | C | 1 |
| 18 | 0.648887 | C | 1 |
| 18 | 0.648887 | C | 1 |
| 19 | 0.594021 | C | 1 |
| 19 | 0.594021 | C | 1 |
| 18 | 0.648887 | C | 1 |
| 19 | 0.594021 | C | 1 |
| 18 | 0.648887 | C | 1 |
| 18 | 0.648887 | C | 1 |
| 1  | 0.220485 | C | 1 |
| 18 | 0.648887 | C | 1 |

|    |          |   |   |
|----|----------|---|---|
| 19 | 0.594021 | C | 1 |
| 1  | 0.220485 | C | 1 |
| 1  | 0.220485 | C | 1 |
| 18 | 0.648887 | C | 1 |
| 3  | 0.545356 | L | 0 |
| 1  | 0.220485 | C | 1 |
| 18 | 0.648887 | C | 1 |
| 18 | 0.648887 | C | 1 |
| 18 | 0.648887 | C | 1 |
| 18 | 0.648887 | C | 1 |
| 19 | 0.594021 | C | 1 |
| 19 | 0.574696 | C | 1 |
| 19 | 0.574696 | C | 1 |
| 19 | 0.574696 | C | 1 |
| 9  | 0.670094 | C | 1 |
| 9  | 0.670094 | C | 1 |
| 9  | 0.670094 | C | 1 |
| 9  | 0.670094 | C | 1 |
| 19 | 0.574696 | C | 1 |
| 9  | 0.670094 | C | 1 |
| 9  | 0.670094 | C | 1 |
| 9  | 0.670094 | C | 1 |
| 9  | 0.670094 | C | 1 |
| 19 | 0.574696 | C | 1 |
| 19 | 0.574696 | C | 1 |
| 9  | 0.670094 | C | 1 |
| 19 | 0.574696 | C | 1 |
| 19 | 0.574696 | C | 1 |
| 9  | 0.670094 | C | 1 |
| 11 | 0.666628 | B | 1 |
| 11 | 0.666628 | B | 1 |
| 11 | 0.666628 | B | 1 |
| 11 | 0.666628 | B | 1 |
| 11 | 0.666628 | B | 1 |
| 11 | 0.666628 | B | 1 |
| 11 | 0.666628 | B | 1 |
| 11 | 0.666628 | B | 1 |
| 11 | 0.666628 | B | 1 |
| 11 | 0.666628 | B | 1 |
| 11 | 0.666628 | B | 1 |
| 11 | 0.666628 | B | 1 |
| 11 | 0.666628 | B | 1 |
| 11 | 0.666628 | B | 1 |
| 11 | 0.666628 | B | 1 |
| 17 | 0.720229 | C | 1 |
| 17 | 0.720229 | C | 1 |
| 17 | 0.720229 | C | 1 |
| 17 | 0.720229 | C | 1 |
| 17 | 0.720229 | C | 1 |
| 21 | 0.640637 | C | 1 |
| 4  | 0.40496  | C | 1 |
| 8  | 0.732663 | E | 1 |
| 7  | 0.190341 | I | 0 |
| 4  | 0.538082 | Q | 0 |
| 6  | 0.409916 | I | 0 |
| 8  | 0.732663 | E | 1 |
| 1  | 0.332594 | C | 1 |

|    |          |   |   |
|----|----------|---|---|
| 12 | 0.442772 | C | 1 |
| 4  | 0.311223 | C | 1 |
| 5  | 0.363466 | C | 1 |
| 5  | 0.363466 | C | 1 |
| 21 | 0.640637 | C | 1 |
| 7  | 0.397482 | C | 1 |
| 14 | 0.445308 | C | 1 |
| 16 | 0.715811 | C | 1 |
| 3  | 0.509828 | I | 0 |
| 4  | 0.311223 | C | 1 |
| 12 | 0.689439 | E | 1 |
| 7  | 0.429182 | C | 1 |
| 5  | 0.363466 | C | 1 |
| 12 | 0.689439 | E | 1 |
| 5  | 0.566388 | C | 1 |
| 14 | 0.445308 | C | 1 |
| 12 | 0.357955 | I | 0 |
| 22 | 0.581709 | F | 0 |
| 22 | 0.581709 | F | 0 |
| 18 | 0.496751 | I | 0 |
| 13 | 0.299625 | I | 0 |
| 11 | 0.231966 | C | 1 |
| 4  | 0.436852 | C | 1 |
| 15 | 0.269583 | R | 0 |
| 7  | 0.190341 | I | 0 |
| 5  | 0.322853 | C | 1 |
| 15 | 0.269583 | R | 0 |
| 3  | 0.068284 | C | 1 |
| 5  | 0.255056 | C | 1 |
| 5  | 0.322853 | C | 1 |
| 5  | 0.322853 | C | 1 |
| 15 | 0.269583 | R | 0 |
| 5  | 0.363466 | C | 1 |
| 19 | 0.697306 | F | 0 |
| 5  | 0.243313 | C | 1 |
| 21 | 0.640637 | C | 1 |
| 5  | 0.243313 | C | 1 |
| 7  | 0.397482 | C | 1 |
| 5  | 0.243313 | C | 1 |
| 1  | 0.117156 | C | 1 |
| 3  | 0.068284 | C | 1 |
| 8  | 0.531029 | C | 1 |
| 5  | 0.243313 | C | 1 |
| 12 | 0.357955 | I | 0 |
| 5  | 0.656219 | C | 1 |
| 4  | 0.436852 | C | 1 |
| 7  | 0.429182 | C | 1 |
| 7  | 0.397482 | C | 1 |
| 6  | 0.3786   | I | 0 |
| 5  | 0.370099 | C | 1 |
| 6  | 0.409916 | I | 0 |
| 5  | 0.469012 | C | 1 |
| 5  | 0.515346 | C | 1 |
| 8  | 0.531029 | C | 1 |

|    |          |   |   |
|----|----------|---|---|
| 21 | 0.640637 | C | 1 |
| 5  | 0.255056 | C | 1 |
| 4  | 0.601656 | C | 1 |
| 8  | 0.732663 | E | 1 |
| 22 | 0.581709 | F | 0 |
| 14 | 0.445308 | C | 1 |
| 5  | 0.322853 | C | 1 |
| 5  | 0.469012 | C | 1 |
| 7  | 0.190341 | I | 0 |
| 7  | 0.429182 | C | 1 |
| 7  | 0.397482 | C | 1 |
| 6  | 0.409916 | I | 0 |
| 4  | 0.40496  | C | 1 |
| 4  | 0.538082 | Q | 0 |
| 16 | 0.715811 | C | 1 |
| 21 | 0.640637 | C | 1 |
| 6  | 0.391922 | C | 1 |
| 5  | 0.371644 | D | 1 |
| 12 | 0.357955 | I | 0 |
| 5  | 0.578367 | C | 1 |
| 5  | 0.371644 | D | 1 |
| 5  | 0.507713 | C | 1 |
| 6  | 0.409916 | I | 0 |
| 5  | 0.566388 | C | 1 |
| 3  | 0.068284 | C | 1 |
| 5  | 0.370099 | C | 1 |
| 6  | 0.391922 | C | 1 |
| 13 | 0.299625 | I | 0 |
| 1  | 0.117156 | C | 1 |
| 5  | 0.566388 | C | 1 |
| 4  | 0.601656 | C | 1 |
| 6  | 0.382164 | C | 1 |
| 22 | 0.581709 | F | 0 |
| 5  | 0.656219 | C | 1 |
| 11 | 0.231966 | C | 1 |
| 8  | 0.732663 | E | 1 |
| 8  | 0.732663 | E | 1 |
| 5  | 0.578367 | C | 1 |
| 12 | 0.689439 | E | 1 |
| 4  | 0.601656 | C | 1 |
| 9  | 0.141569 | I | 0 |
| 18 | 0.496751 | I | 0 |
| 12 | 0.357955 | I | 0 |
| 5  | 0.255056 | C | 1 |
| 22 | 0.581709 | F | 0 |
| 3  | 0.509828 | I | 0 |
| 15 | 0.269583 | R | 0 |
| 5  | 0.255056 | C | 1 |
| 16 | 0.798141 | S | 0 |
| 11 | 0.366453 | C | 1 |
| 4  | 0.311223 | C | 1 |
| 5  | 0.578367 | C | 1 |
| 4  | 0.248195 | C | 1 |
| 12 | 0.357955 | I | 0 |

|    |          |   |   |
|----|----------|---|---|
| 4  | 0.538082 | Q | 0 |
| 5  | 0.469012 | C | 1 |
| 4  | 0.361858 | C | 1 |
| 4  | 0.255116 | C | 1 |
| 4  | 0.40496  | C | 1 |
| 5  | 0.322853 | C | 1 |
| 21 | 0.640637 | C | 1 |
| 1  | 0.117156 | C | 1 |
| 8  | 0.531029 | C | 1 |
| 4  | 0.361858 | C | 1 |
| 12 | 0.442772 | C | 1 |
| 3  | 0.068284 | C | 1 |
| 5  | 0.322853 | C | 1 |
| 21 | 0.640637 | C | 1 |
| 4  | 0.601656 | C | 1 |
| 6  | 0.382164 | C | 1 |
| 5  | 0.469012 | C | 1 |
| 5  | 0.566388 | C | 1 |
| 19 | 0.193429 | C | 1 |
| 6  | 0.382164 | C | 1 |
| 22 | 0.581709 | F | 0 |
| 5  | 0.566388 | C | 1 |
| 4  | 0.40496  | C | 1 |
| 14 | 0.445308 | C | 1 |
| 21 | 0.640637 | C | 1 |
| 13 | 0.299625 | I | 0 |
| 5  | 0.243313 | C | 1 |
| 5  | 0.469012 | C | 1 |
| 19 | 0.697306 | F | 0 |
| 6  | 0.391922 | C | 1 |
| 21 | 0.640637 | C | 1 |
| 19 | 0.193429 | C | 1 |
| 5  | 0.243313 | C | 1 |
| 12 | 0.689439 | E | 1 |
| 19 | 0.193429 | C | 1 |
| 4  | 0.40496  | C | 1 |
| 19 | 0.193429 | C | 1 |
| 14 | 0.445308 | C | 1 |
| 7  | 0.397482 | C | 1 |
| 5  | 0.322853 | C | 1 |
| 5  | 0.371644 | D | 1 |
| 5  | 0.322853 | C | 1 |
| 15 | 0.715924 | F | 0 |
| 19 | 0.697306 | F | 0 |
| 5  | 0.515346 | C | 1 |
| 6  | 0.409916 | I | 0 |
| 4  | 0.248195 | C | 1 |
| 7  | 0.190341 | I | 0 |
| 5  | 0.656219 | C | 1 |
| 7  | 0.397482 | C | 1 |
| 16 | 0.715811 | C | 1 |
| 5  | 0.243313 | C | 1 |
| 11 | 0.366453 | C | 1 |
| 4  | 0.436852 | C | 1 |

|    |          |   |   |
|----|----------|---|---|
| 5  | 0.469012 | C | 1 |
| 8  | 0.531029 | C | 1 |
| 21 | 0.640637 | C | 1 |
| 5  | 0.219062 | I | 0 |
| 5  | 0.564477 | C | 1 |
| 4  | 0.538082 | Q | 0 |
| 5  | 0.219062 | I | 0 |
| 6  | 0.409916 | I | 0 |
| 22 | 0.581709 | F | 0 |
| 5  | 0.564477 | C | 1 |
| 5  | 0.507713 | C | 1 |
| 5  | 0.219062 | I | 0 |
| 4  | 0.436852 | C | 1 |
| 5  | 0.469012 | C | 1 |
| 21 | 0.640637 | C | 1 |
| 14 | 0.445308 | C | 1 |
| 8  | 0.732663 | E | 1 |
| 5  | 0.469012 | C | 1 |
| 7  | 0.429182 | C | 1 |
| 5  | 0.469012 | C | 1 |
| 5  | 0.255056 | C | 1 |
| 15 | 0.715924 | F | 0 |
| 22 | 0.581709 | F | 0 |
| 21 | 0.640637 | C | 1 |
| 5  | 0.507713 | C | 1 |
| 11 | 0.366453 | C | 1 |
| 6  | 0.3786   | I | 0 |
| 5  | 0.515346 | C | 1 |
| 22 | 0.581709 | F | 0 |
| 22 | 0.581709 | F | 0 |
| 5  | 0.515346 | C | 1 |
| 6  | 0.402175 | I | 0 |
| 4  | 0.538082 | Q | 0 |
| 5  | 0.578367 | C | 1 |
| 4  | 0.248195 | C | 1 |
| 21 | 0.640637 | C | 1 |
| 5  | 0.578367 | C | 1 |
| 15 | 0.269583 | R | 0 |
| 4  | 0.538082 | Q | 0 |
| 5  | 0.578367 | C | 1 |
| 4  | 0.436852 | C | 1 |
| 5  | 0.219062 | I | 0 |
| 6  | 0.409916 | I | 0 |
| 5  | 0.219062 | I | 0 |
| 6  | 0.616481 | I | 0 |
| 5  | 0.371644 | D | 1 |
| 3  | 0.509828 | I | 0 |
| 16 | 0.798141 | S | 0 |
| 18 | 0.496751 | I | 0 |
| 7  | 0.429182 | C | 1 |
| 11 | 0.231966 | C | 1 |
| 22 | 0.581709 | F | 0 |
| 5  | 0.255056 | C | 1 |
| 5  | 0.363466 | C | 1 |



|    |          |   |   |
|----|----------|---|---|
| 5  | 0.255056 | C | 1 |
| 4  | 0.361858 | C | 1 |
| 5  | 0.578367 | C | 1 |
| 5  | 0.255056 | C | 1 |
| 6  | 0.409916 | I | 0 |
| 12 | 0.442772 | C | 1 |
| 5  | 0.656219 | C | 1 |
| 22 | 0.581709 | F | 0 |
| 5  | 0.370099 | C | 1 |
| 1  | 0.117156 | C | 1 |
| 8  | 0.339487 | C | 1 |
| 21 | 0.640637 | C | 1 |
| 12 | 0.357955 | I | 0 |
| 6  | 0.616481 | I | 0 |
| 11 | 0.231966 | C | 1 |
| 8  | 0.339487 | C | 1 |
| 5  | 0.578367 | C | 1 |
| 19 | 0.193429 | C | 1 |
| 19 | 0.193429 | C | 1 |
| 6  | 0.382164 | C | 1 |
| 6  | 0.409916 | I | 0 |
| 6  | 0.409916 | I | 0 |
| 21 | 0.640637 | C | 1 |
| 8  | 0.531029 | C | 1 |
| 5  | 0.469012 | C | 1 |
| 4  | 0.361858 | C | 1 |
| 6  | 0.409916 | I | 0 |
| 18 | 0.496751 | I | 0 |
| 18 | 0.496751 | I | 0 |
| 13 | 0.299625 | I | 0 |
| 19 | 0.193429 | C | 1 |
| 4  | 0.361858 | C | 1 |
| 16 | 0.715811 | C | 1 |
| 12 | 0.689439 | E | 1 |
| 5  | 0.578367 | C | 1 |
| 4  | 0.248195 | C | 1 |
| 5  | 0.578367 | C | 1 |
| 12 | 0.357955 | I | 0 |
| 7  | 0.190341 | I | 0 |
| 11 | 0.231966 | C | 1 |
| 4  | 0.601656 | C | 1 |
| 5  | 0.507713 | C | 1 |
| 3  | 0.068284 | C | 1 |
| 6  | 0.402175 | I | 0 |
| 1  | 0.117156 | C | 1 |
| 4  | 0.436852 | C | 1 |
| 16 | 0.715811 | C | 1 |
| 4  | 0.142781 | I | 0 |
| 11 | 0.231966 | C | 1 |
| 5  | 0.363466 | C | 1 |
| 16 | 0.798141 | S | 0 |
| 6  | 0.409916 | I | 0 |
| 5  | 0.564477 | C | 1 |
| 5  | 0.255056 | C | 1 |

|    |          |   |   |
|----|----------|---|---|
| 7  | 0.190341 | I | 0 |
| 4  | 0.538082 | Q | 0 |
| 8  | 0.531029 | C | 1 |
| 5  | 0.507713 | C | 1 |
| 1  | 0.117156 | C | 1 |
| 6  | 0.616481 | I | 0 |
| 7  | 0.429182 | C | 1 |
| 8  | 0.339487 | C | 1 |
| 13 | 0.299625 | I | 0 |
| 8  | 0.339487 | C | 1 |
| 12 | 0.442772 | C | 1 |
| 4  | 0.373216 | N | 0 |
| 4  | 0.538082 | Q | 0 |
| 5  | 0.322853 | C | 1 |
| 5  | 0.656219 | C | 1 |
| 13 | 0.299625 | I | 0 |
| 4  | 0.373216 | N | 0 |
| 4  | 0.538082 | Q | 0 |
| 8  | 0.339487 | C | 1 |
| 19 | 0.193429 | C | 1 |
| 22 | 0.581709 | F | 0 |
| 4  | 0.373216 | N | 0 |
| 3  | 0.509828 | I | 0 |
| 5  | 0.322853 | C | 1 |
| 16 | 0.715811 | C | 1 |
| 9  | 0.141569 | I | 0 |
| 11 | 0.366453 | C | 1 |
| 6  | 0.409916 | I | 0 |
| 12 | 0.442772 | C | 1 |
| 8  | 0.339487 | C | 1 |
| 5  | 0.243313 | C | 1 |
| 5  | 0.322853 | C | 1 |
| 12 | 0.442772 | C | 1 |
| 4  | 0.538082 | Q | 0 |
| 6  | 0.3786   | I | 0 |
| 4  | 0.361858 | C | 1 |
| 15 | 0.715924 | F | 0 |
| 5  | 0.566388 | C | 1 |
| 5  | 0.363466 | C | 1 |
| 16 | 0.798141 | S | 0 |
| 4  | 0.142781 | I | 0 |
| 11 | 0.231966 | C | 1 |
| 1  | 0.332594 | C | 1 |
| 1  | 0.332594 | C | 1 |
| 5  | 0.363466 | C | 1 |
| 5  | 0.469012 | C | 1 |
| 6  | 0.391922 | C | 1 |
| 5  | 0.515346 | C | 1 |
| 22 | 0.581709 | F | 0 |
| 5  | 0.578367 | C | 1 |
| 7  | 0.429182 | C | 1 |
| 3  | 0.509828 | I | 0 |
| 4  | 0.601656 | C | 1 |
| 4  | 0.601656 | C | 1 |

|    |          |   |   |
|----|----------|---|---|
| 4  | 0.601656 | C | 1 |
| 15 | 0.715924 | F | 0 |
| 4  | 0.601656 | C | 1 |
| 16 | 0.798141 | S | 0 |
| 4  | 0.373216 | N | 0 |
| 6  | 0.391922 | C | 1 |
| 6  | 0.3786   | I | 0 |
| 1  | 0.332594 | C | 1 |
| 12 | 0.689439 | E | 1 |
| 4  | 0.255116 | C | 1 |
| 4  | 0.373216 | N | 0 |
| 21 | 0.640637 | C | 1 |
| 13 | 0.299625 | I | 0 |
| 5  | 0.566388 | C | 1 |
| 5  | 0.219062 | I | 0 |
| 3  | 0.509828 | I | 0 |
| 7  | 0.397482 | C | 1 |
| 21 | 0.640637 | C | 1 |
| 13 | 0.299625 | I | 0 |
| 3  | 0.509828 | I | 0 |
| 14 | 0.445308 | C | 1 |
| 7  | 0.429182 | C | 1 |
| 5  | 0.371644 | D | 1 |
| 5  | 0.322853 | C | 1 |
| 4  | 0.361858 | C | 1 |
| 4  | 0.361858 | C | 1 |
| 5  | 0.469012 | C | 1 |
| 4  | 0.142781 | I | 0 |
| 22 | 0.581709 | F | 0 |
| 4  | 0.311223 | C | 1 |
| 4  | 0.311223 | C | 1 |
| 4  | 0.311223 | C | 1 |
| 4  | 0.142781 | I | 0 |
| 11 | 0.231966 | C | 1 |
| 6  | 0.382164 | C | 1 |
| 8  | 0.531029 | C | 1 |
| 15 | 0.715924 | F | 0 |
| 4  | 0.40496  | C | 1 |
| 4  | 0.373216 | N | 0 |
| 7  | 0.190341 | I | 0 |
| 11 | 0.366453 | C | 1 |
| 5  | 0.515346 | C | 1 |
| 6  | 0.616481 | I | 0 |
| 16 | 0.715811 | C | 1 |
| 6  | 0.409916 | I | 0 |
| 7  | 0.397482 | C | 1 |
| 5  | 0.255056 | C | 1 |
| 4  | 0.40496  | C | 1 |
| 12 | 0.689439 | E | 1 |
| 15 | 0.715924 | F | 0 |
| 21 | 0.640637 | C | 1 |
| 4  | 0.40496  | C | 1 |
| 5  | 0.255056 | C | 1 |
| 6  | 0.382164 | C | 1 |

|    |          |   |   |
|----|----------|---|---|
| 21 | 0.640637 | C | 1 |
| 6  | 0.3786   | I | 0 |
| 5  | 0.469012 | C | 1 |
| 13 | 0.299625 | I | 0 |
| 4  | 0.373216 | N | 0 |
| 5  | 0.255056 | C | 1 |
| 6  | 0.391922 | C | 1 |
| 5  | 0.469012 | C | 1 |
| 4  | 0.248195 | C | 1 |
| 4  | 0.436852 | C | 1 |
| 5  | 0.255056 | C | 1 |
| 6  | 0.3786   | I | 0 |
| 13 | 0.299625 | I | 0 |
| 5  | 0.507713 | C | 1 |
| 5  | 0.371644 | D | 1 |
| 4  | 0.601656 | C | 1 |
| 14 | 0.445308 | C | 1 |
| 7  | 0.190341 | I | 0 |
| 5  | 0.656219 | C | 1 |
| 5  | 0.656219 | C | 1 |
| 5  | 0.219062 | I | 0 |
| 12 | 0.442772 | C | 1 |
| 4  | 0.361858 | C | 1 |
| 18 | 0.496751 | I | 0 |
| 5  | 0.219062 | I | 0 |
| 5  | 0.564477 | C | 1 |
| 8  | 0.531029 | C | 1 |
| 6  | 0.616481 | I | 0 |
| 11 | 0.366453 | C | 1 |
| 15 | 0.715924 | F | 0 |
| 4  | 0.255116 | C | 1 |
| 5  | 0.578367 | C | 1 |
| 6  | 0.391922 | C | 1 |
| 6  | 0.382164 | C | 1 |
| 12 | 0.442772 | C | 1 |
| 5  | 0.255056 | C | 1 |
| 14 | 0.445308 | C | 1 |
| 8  | 0.339487 | C | 1 |
| 6  | 0.391922 | C | 1 |
| 13 | 0.299625 | I | 0 |
| 5  | 0.578367 | C | 1 |
| 12 | 0.689439 | E | 1 |
| 5  | 0.469012 | C | 1 |
| 1  | 0.117156 | C | 1 |
| 7  | 0.429182 | C | 1 |
| 19 | 0.193429 | C | 1 |
| 5  | 0.255056 | C | 1 |
| 4  | 0.538082 | Q | 0 |
| 6  | 0.391922 | C | 1 |
| 11 | 0.366453 | C | 1 |
| 4  | 0.311223 | C | 1 |
| 21 | 0.640637 | C | 1 |
| 5  | 0.566388 | C | 1 |
| 6  | 0.391922 | C | 1 |

|    |          |   |   |
|----|----------|---|---|
| 6  | 0.409916 | I | 0 |
| 5  | 0.566388 | C | 1 |
| 11 | 0.231966 | C | 1 |
| 5  | 0.507713 | C | 1 |
| 12 | 0.689439 | E | 1 |
| 5  | 0.578367 | C | 1 |
| 7  | 0.397482 | C | 1 |
| 6  | 0.409916 | I | 0 |
| 4  | 0.373216 | N | 0 |
| 12 | 0.442772 | C | 1 |
| 4  | 0.40496  | C | 1 |
| 5  | 0.566388 | C | 1 |
| 1  | 0.332594 | C | 1 |
| 21 | 0.640637 | C | 1 |
| 6  | 0.409916 | I | 0 |
| 21 | 0.640637 | C | 1 |
| 16 | 0.715811 | C | 1 |
| 15 | 0.715924 | F | 0 |
| 5  | 0.219062 | I | 0 |
| 16 | 0.715811 | C | 1 |
| 5  | 0.566388 | C | 1 |
| 5  | 0.578367 | C | 1 |
| 5  | 0.564477 | C | 1 |
| 4  | 0.142781 | I | 0 |
| 12 | 0.442772 | C | 1 |
| 16 | 0.715811 | C | 1 |
| 5  | 0.363466 | C | 1 |
| 19 | 0.697306 | F | 0 |
| 12 | 0.689439 | E | 1 |
| 12 | 0.689439 | E | 1 |
| 5  | 0.578367 | C | 1 |
| 4  | 0.40496  | C | 1 |
| 3  | 0.068284 | C | 1 |
| 4  | 0.311223 | C | 1 |
| 8  | 0.531029 | C | 1 |
| 8  | 0.339487 | C | 1 |
| 4  | 0.373216 | N | 0 |
| 8  | 0.339487 | C | 1 |
| 19 | 0.697306 | F | 0 |
| 6  | 0.391922 | C | 1 |
| 9  | 0.141569 | I | 0 |
| 3  | 0.068284 | C | 1 |
| 21 | 0.640637 | C | 1 |
| 6  | 0.391922 | C | 1 |
| 6  | 0.402175 | I | 0 |
| 11 | 0.366453 | C | 1 |
| 12 | 0.442772 | C | 1 |
| 5  | 0.243313 | C | 1 |
| 21 | 0.640637 | C | 1 |
| 5  | 0.371644 | D | 1 |
| 12 | 0.689439 | E | 1 |
| 12 | 0.689439 | E | 1 |
| 5  | 0.322853 | C | 1 |
| 5  | 0.322853 | C | 1 |

|    |          |   |   |
|----|----------|---|---|
| 5  | 0.507713 | C | 1 |
| 22 | 0.581709 | F | 0 |
| 11 | 0.366453 | C | 1 |
| 22 | 0.581709 | F | 0 |
| 5  | 0.578367 | C | 1 |
| 5  | 0.656219 | C | 1 |
| 19 | 0.697306 | F | 0 |
| 21 | 0.640637 | C | 1 |
| 4  | 0.142781 | I | 0 |
| 18 | 0.496751 | I | 0 |
| 4  | 0.40496  | C | 1 |
| 5  | 0.507713 | C | 1 |
| 12 | 0.442772 | C | 1 |
| 22 | 0.581709 | F | 0 |
| 21 | 0.640637 | C | 1 |
| 4  | 0.40496  | C | 1 |
| 12 | 0.442772 | C | 1 |
| 4  | 0.142781 | I | 0 |
| 4  | 0.40496  | C | 1 |
| 1  | 0.332594 | C | 1 |
| 11 | 0.366453 | C | 1 |
| 5  | 0.566388 | C | 1 |
| 8  | 0.531029 | C | 1 |
| 11 | 0.445928 | C | 1 |
| 22 | 0.563075 | C | 1 |
| 22 | 0.563075 | C | 1 |
| 12 | 0.835623 | C | 1 |
| 11 | 0.445928 | C | 1 |
| 12 | 0.835623 | C | 1 |
| 22 | 0.563075 | C | 1 |
| 11 | 0.445928 | C | 1 |
| 22 | 0.563075 | C | 1 |
| 22 | 0.563075 | C | 1 |
| 8  | 0.803847 | C | 1 |
| 12 | 0.835623 | C | 1 |
| 22 | 0.563075 | C | 1 |
| 22 | 0.563075 | C | 1 |
| 11 | 0.445928 | C | 1 |
| 22 | 0.563075 | C | 1 |
| 11 | 0.445928 | C | 1 |
| 8  | 0.803847 | C | 1 |
| 22 | 0.563075 | C | 1 |
| 8  | 0.803847 | C | 1 |
| 22 | 0.563075 | C | 1 |
| 11 | 0.445928 | C | 1 |
| 22 | 0.563075 | C | 1 |
| 12 | 0.835623 | C | 1 |
| 22 | 0.563075 | C | 1 |
| 11 | 0.445928 | C | 1 |
| 22 | 0.563075 | C | 1 |
| 11 | 0.445928 | C | 1 |
| 22 | 0.563075 | C | 1 |
| 11 | 0.445928 | C | 1 |
| 12 | 0.835623 | C | 1 |

|    |          |   |   |
|----|----------|---|---|
| 22 | 0.563075 | C | 1 |
| 4  | 0.322432 | C | 1 |
| 13 | 0.637757 | C | 1 |
| 13 | 0.637757 | C | 1 |
| 13 | 0.637757 | C | 1 |
| 11 | 0.284033 | C | 1 |
| 11 | 0.923242 | C | 1 |
| 13 | 0.637757 | C | 1 |
| 4  | 0.322432 | C | 1 |
| 13 | 0.637757 | C | 1 |
| 4  | 0.588478 | C | 1 |
| 11 | 0.284033 | C | 1 |
| 4  | 0.588478 | C | 1 |
| 4  | 0.588478 | C | 1 |
| 5  | 0.347866 | C | 1 |
| 5  | 0.347866 | C | 1 |
| 13 | 0.637757 | C | 1 |
| 5  | 0.347866 | C | 1 |
| 13 | 0.637757 | C | 1 |
| 11 | 0.284033 | C | 1 |
| 4  | 0.322432 | C | 1 |
| 4  | 0.322432 | C | 1 |
| 4  | 0.588478 | C | 1 |
| 5  | 0.347866 | C | 1 |
| 11 | 0.284033 | C | 1 |
| 4  | 0.588478 | C | 1 |
| 5  | 0.347866 | C | 1 |
| 4  | 0.588478 | C | 1 |
| 4  | 0.588478 | C | 1 |
| 11 | 0.284033 | C | 1 |
| 11 | 0.284033 | C | 1 |
| 13 | 0.637757 | C | 1 |
| 4  | 0.322432 | C | 1 |
| 11 | 0.923242 | C | 1 |
| 4  | 0.588478 | C | 1 |
| 4  | 0.588478 | C | 1 |
| 5  | 0.347866 | C | 1 |
| 13 | 0.637757 | C | 1 |
| 4  | 0.322432 | C | 1 |
| 5  | 0.347866 | C | 1 |
| 11 | 0.284033 | C | 1 |
| 5  | 0.347866 | C | 1 |
| 5  | 0.347866 | C | 1 |
| 11 | 0.923242 | C | 1 |
| 4  | 0.322432 | C | 1 |
| 11 | 0.284033 | C | 1 |
| 11 | 0.923242 | C | 1 |
| 8  | 0.547272 | I | 0 |
| 6  | 0.150954 | C | 1 |
| 6  | 0.150954 | C | 1 |
| 1  | 0.435197 | C | 1 |
| 8  | 0.547272 | I | 0 |
| 1  | 0.435197 | C | 1 |
| 1  | 0.435197 | C | 1 |

|               |   |
|---------------|---|
| 6 0.150954 C  | 1 |
| 8 0.607898 C  | 1 |
| 8 0.547272 I  | 0 |
| 6 0.150954 C  | 1 |
| 1 0.435197 C  | 1 |
| 8 0.547272 I  | 0 |
| 1 0.435197 C  | 1 |
| 1 0.435197 C  | 1 |
| 1 0.435197 C  | 1 |
| 6 0.150954 C  | 1 |
| 8 0.607898 C  | 1 |
| 6 0.150954 C  | 1 |
| 6 0.150954 C  | 1 |
| 8 0.607898 C  | 1 |
| 8 0.547272 I  | 0 |
| 6 0.150954 C  | 1 |
| 6 0.150954 C  | 1 |
| 1 0.435197 C  | 1 |
| 8 0.112879 C  | 1 |
| 7 0.274122 C  | 1 |
| 7 0.274122 C  | 1 |
| 6 0.35803 C   | 1 |
| 6 0.35803 C   | 1 |
| 7 0.274122 C  | 1 |
| 7 0.274122 C  | 1 |
| 6 0.35803 C   | 1 |
| 6 0.35803 C   | 1 |
| 8 0.112879 C  | 1 |
| 8 0.112879 C  | 1 |
| 8 0.112879 C  | 1 |
| 6 0.35803 C   | 1 |
| 6 0.35803 C   | 1 |
| 6 0.35803 C   | 1 |
| 6 0.35803 C   | 1 |
| 7 0.274122 C  | 1 |
| 8 0.112879 C  | 1 |
| 15 0.191736 C | 1 |
| 19 0.159466 I | 0 |
| 19 0.159466 I | 0 |
| 19 0.159466 I | 0 |
| 15 0.191736 C | 1 |
| 19 0.159466 I | 0 |
| 15 0.191736 C | 1 |
| 19 0.159466 I | 0 |
| 15 0.191736 C | 1 |
| 15 0.397927 C | 1 |
| 18 0.779825 E | 1 |
| 18 0.494157 C | 1 |
| 17 0.883032 E | 1 |
| 4 0.335976 C  | 1 |
| 18 0.779825 E | 1 |
| 6 0.094254 C  | 1 |
| 15 0.397927 C | 1 |
| 20 0.468577 C | 1 |



|    |          |   |   |
|----|----------|---|---|
| 11 | 0.37746  | F | 0 |
| 4  | 0.275404 | C | 1 |
| 4  | 0.335976 | C | 1 |
| 19 | 0.275603 | C | 1 |
| 18 | 0.494157 | C | 1 |
| 5  | 0.502206 | K | 1 |
| 15 | 0.397927 | C | 1 |
| 4  | 0.275404 | C | 1 |
| 17 | 0.637231 | C | 1 |
| 8  | 0.181807 | C | 1 |
| 15 | 0.146801 | C | 1 |
| 18 | 0.494157 | C | 1 |
| 4  | 0.376116 | C | 1 |
| 11 | 0.217154 | F | 0 |
| 17 | 0.637231 | C | 1 |
| 19 | 0.275603 | C | 1 |
| 17 | 0.637231 | C | 1 |
| 4  | 0.315341 | F | 0 |
| 4  | 0.376116 | C | 1 |
| 18 | 0.494157 | C | 1 |
| 4  | 0.335976 | C | 1 |
| 15 | 0.146801 | C | 1 |
| 17 | 0.637231 | C | 1 |
| 4  | 0.376116 | C | 1 |
| 3  | 0.603959 | C | 1 |
| 20 | 0.468577 | C | 1 |
| 18 | 0.494157 | C | 1 |
| 15 | 0.397927 | C | 1 |
| 15 | 0.397927 | C | 1 |
| 20 | 0.468577 | C | 1 |
| 18 | 0.494157 | C | 1 |
| 18 | 0.779825 | E | 1 |
| 6  | 0.094254 | C | 1 |
| 17 | 0.637231 | C | 1 |
| 11 | 0.217154 | F | 0 |
| 19 | 0.275603 | C | 1 |
| 4  | 0.376116 | C | 1 |
| 5  | 0.697847 | F | 0 |
| 5  | 0.502206 | K | 1 |
| 15 | 0.397927 | C | 1 |
| 14 | 0.593657 | C | 1 |
| 4  | 0.315341 | F | 0 |
| 11 | 0.37746  | F | 0 |
| 18 | 0.779825 | E | 1 |
| 5  | 0.168216 | C | 1 |
| 6  | 0.370404 | C | 1 |
| 5  | 0.697847 | F | 0 |
| 8  | 0.181807 | C | 1 |
| 18 | 0.494157 | C | 1 |
| 15 | 0.397927 | C | 1 |
| 18 | 0.494157 | C | 1 |
| 15 | 0.397927 | C | 1 |
| 11 | 0.217154 | F | 0 |
| 5  | 0.254698 | C | 1 |

|               |   |
|---------------|---|
| 18 0.779825 E | 1 |
| 15 0.146801 C | 1 |
| 16 0.758733 D | 1 |
| 18 0.779825 E | 1 |
| 18 0.494157 C | 1 |
| 6 0.094254 C  | 1 |
| 15 0.397927 C | 1 |
| 18 0.779825 E | 1 |
| 19 0.275603 C | 1 |
| 15 0.146801 C | 1 |
| 18 0.779825 E | 1 |
| 11 0.37746 F  | 0 |
| 17 0.883032 E | 1 |
| 6 0.094254 C  | 1 |
| 6 0.370404 C  | 1 |
| 18 0.494157 C | 1 |
| 13 0.323402 C | 1 |
| 15 0.397927 C | 1 |
| 19 0.275603 C | 1 |
| 15 0.146801 C | 1 |
| 17 0.637231 C | 1 |
| 5 0.502206 K  | 1 |
| 18 0.494157 C | 1 |
| 18 0.494157 C | 1 |
| 5 0.502206 K  | 1 |
| 18 0.494157 C | 1 |
| 19 0.275603 C | 1 |
| 5 0.697847 F  | 0 |
| 11 0.217154 F | 0 |
| 4 0.376116 C  | 1 |
| 4 0.376116 C  | 1 |
| 4 0.335976 C  | 1 |
| 11 0.217154 F | 0 |
| 4 0.315341 F  | 0 |
| 11 0.37746 F  | 0 |
| 14 0.593657 C | 1 |
| 4 0.315341 F  | 0 |
| 15 0.146801 C | 1 |
| 18 0.779825 E | 1 |
| 5 0.168216 C  | 1 |
| 18 0.494157 C | 1 |
| 18 0.494157 C | 1 |
| 17 0.883032 E | 1 |
| 5 0.697847 F  | 0 |
| 13 0.323402 C | 1 |
| 5 0.168216 C  | 1 |
| 8 0.181807 C  | 1 |
| 5 0.697847 F  | 0 |
| 18 0.779825 E | 1 |
| 16 0.758733 D | 1 |
| 19 0.275603 C | 1 |
| 19 0.275603 C | 1 |
| 6 0.094254 C  | 1 |
| 11 0.217154 F | 0 |

|                |   |
|----------------|---|
| 18 0. 779825 E | 1 |
| 4 0. 315341 F  | 0 |
| 8 0. 181807 C  | 1 |
| 16 0. 758733 D | 1 |
| 16 0. 758733 D | 1 |
| 14 0. 593657 C | 1 |
| 18 0. 494157 C | 1 |
| 16 0. 758733 D | 1 |
| 3 0. 603959 C  | 1 |
| 14 0. 593657 C | 1 |
| 18 0. 494157 C | 1 |
| 18 0. 494157 C | 1 |
| 15 0. 146801 C | 1 |
| 15 0. 397927 C | 1 |
| 6 0. 094254 C  | 1 |
| 15 0. 146801 C | 1 |
| 4 0. 315341 F  | 0 |
| 4 0. 275404 C  | 1 |
| 13 0. 323402 C | 1 |
| 18 0. 494157 C | 1 |
| 19 0. 275603 C | 1 |
| 16 0. 758733 D | 1 |
| 17 0. 883032 E | 1 |
| 5 0. 168216 C  | 1 |
| 18 0. 779825 E | 1 |
| 5 0. 697847 F  | 0 |
| 17 0. 883032 E | 1 |
| 6 0. 370404 C  | 1 |
| 3 0. 603959 C  | 1 |
| 18 0. 779825 E | 1 |
| 6 0. 370404 C  | 1 |
| 4 0. 376116 C  | 1 |
| 15 0. 146801 C | 1 |
| 18 0. 779825 E | 1 |
| 17 0. 883032 E | 1 |
| 11 0. 217154 F | 0 |
| 15 0. 146801 C | 1 |
| 6 0. 094254 C  | 1 |
| 18 0. 494157 C | 1 |
| 15 0. 397927 C | 1 |
| 18 0. 494157 C | 1 |
| 4 0. 376116 C  | 1 |
| 14 0. 593657 C | 1 |
| 5 0. 254698 C  | 1 |
| 14 0. 593657 C | 1 |
| 14 0. 593657 C | 1 |
| 20 0. 468577 C | 1 |
| 5 0. 697847 F  | 0 |
| 5 0. 254698 C  | 1 |
| 14 0. 593657 C | 1 |
| 20 0. 468577 C | 1 |
| 19 0. 275603 C | 1 |
| 15 0. 146801 C | 1 |
| 5 0. 502206 K  | 1 |

|    |          |   |   |
|----|----------|---|---|
| 5  | 0.254698 | C | 1 |
| 13 | 0.323402 | C | 1 |
| 4  | 0.335976 | C | 1 |
| 11 | 0.37746  | F | 0 |
| 14 | 0.593657 | C | 1 |
| 20 | 0.468577 | C | 1 |
| 18 | 0.494157 | C | 1 |
| 18 | 0.494157 | C | 1 |
| 5  | 0.697847 | F | 0 |
| 17 | 0.637231 | C | 1 |
| 5  | 0.697847 | F | 0 |
| 5  | 0.697847 | F | 0 |
| 4  | 0.275404 | C | 1 |
| 13 | 0.323402 | C | 1 |
| 14 | 0.593657 | C | 1 |
| 20 | 0.468577 | C | 1 |
| 5  | 0.697847 | F | 0 |
| 11 | 0.217154 | F | 0 |
| 15 | 0.146801 | C | 1 |
| 5  | 0.697847 | F | 0 |
| 14 | 0.593657 | C | 1 |
| 18 | 0.494157 | C | 1 |
| 20 | 0.468577 | C | 1 |
| 14 | 0.593657 | C | 1 |
| 4  | 0.376116 | C | 1 |
| 15 | 0.397927 | C | 1 |
| 5  | 0.254698 | C | 1 |
| 14 | 0.593657 | C | 1 |
| 8  | 0.181807 | C | 1 |
| 20 | 0.468577 | C | 1 |
| 15 | 0.397927 | C | 1 |
| 15 | 0.397927 | C | 1 |
| 14 | 0.593657 | C | 1 |
| 11 | 0.37746  | F | 0 |
| 19 | 0.275603 | C | 1 |
| 4  | 0.376116 | C | 1 |
| 15 | 0.146801 | C | 1 |
| 17 | 0.637231 | C | 1 |
| 5  | 0.254698 | C | 1 |
| 19 | 0.275603 | C | 1 |
| 15 | 0.397927 | C | 1 |
| 18 | 0.779825 | E | 1 |
| 20 | 0.468577 | C | 1 |
| 4  | 0.315341 | F | 0 |
| 20 | 0.468577 | C | 1 |
| 18 | 0.494157 | C | 1 |
| 6  | 0.094254 | C | 1 |
| 14 | 0.593657 | C | 1 |
| 16 | 0.758733 | D | 1 |
| 17 | 0.637231 | C | 1 |
| 13 | 0.323402 | C | 1 |
| 17 | 0.883032 | E | 1 |
| 18 | 0.779825 | E | 1 |
| 15 | 0.397927 | C | 1 |



|    |          |   |   |
|----|----------|---|---|
| 9  | 0.35334  | C | 1 |
| 9  | 0.35334  | C | 1 |
| 9  | 0.35334  | C | 1 |
| 5  | 0.252276 | C | 1 |
| 5  | 0.252276 | C | 1 |
| 5  | 0.252276 | C | 1 |
| 5  | 0.252276 | C | 1 |
| 5  | 0.252276 | C | 1 |
| 5  | 0.252276 | C | 1 |
| 5  | 0.252276 | C | 1 |
| 5  | 0.252276 | C | 1 |
| 5  | 0.252276 | C | 1 |
| 5  | 0.252276 | C | 1 |
| 18 | 0.312977 | C | 1 |
| 11 | 0.461471 | C | 1 |
| 5  | 0.36619  | I | 0 |
| 5  | 0.462497 | C | 1 |
| 5  | 0.412786 | C | 1 |
| 6  | 0.358148 | C | 1 |
| 3  | 0.162197 | C | 1 |
| 18 | 0.312977 | C | 1 |
| 5  | 0.36619  | I | 0 |
| 4  | 0.24828  | C | 1 |
| 3  | 0.162197 | C | 1 |
| 4  | 0.29374  | C | 1 |
| 18 | 0.312977 | C | 1 |
| 7  | 0.430142 | C | 1 |
| 4  | 0.24828  | C | 1 |
| 7  | 0.430142 | C | 1 |
| 5  | 0.412786 | C | 1 |
| 5  | 0.200623 | I | 0 |
| 6  | 0.358148 | C | 1 |
| 5  | 0.068284 | R | 0 |
| 5  | 0.36619  | I | 0 |
| 5  | 0.411538 | C | 1 |
| 5  | 0.36619  | I | 0 |
| 3  | 0.162197 | C | 1 |
| 3  | 0.162197 | C | 1 |
| 5  | 0.200623 | I | 0 |
| 4  | 0.29374  | C | 1 |
| 5  | 0.411538 | C | 1 |
| 3  | 0.162197 | C | 1 |
| 3  | 0.162197 | C | 1 |
| 4  | 0.24828  | C | 1 |
| 5  | 0.462497 | C | 1 |
| 11 | 0.461471 | C | 1 |
| 18 | 0.312977 | C | 1 |
| 11 | 0.461471 | C | 1 |
| 5  | 0.068284 | R | 0 |
| 18 | 0.312977 | C | 1 |
| 4  | 0.29374  | C | 1 |
| 11 | 0.461471 | C | 1 |
| 5  | 0.411538 | C | 1 |
| 7  | 0.430142 | C | 1 |
| 3  | 0.162197 | C | 1 |

|    |          |   |   |
|----|----------|---|---|
| 4  | 0.24828  | C | 1 |
| 5  | 0.36619  | I | 0 |
| 18 | 0.312977 | C | 1 |
| 6  | 0.358148 | C | 1 |
| 5  | 0.068284 | R | 0 |
| 11 | 0.461471 | C | 1 |
| 5  | 0.462497 | C | 1 |
| 4  | 0.29374  | C | 1 |
| 6  | 0.358148 | C | 1 |
| 18 | 0.312977 | C | 1 |
| 3  | 0.162197 | C | 1 |
| 5  | 0.411538 | C | 1 |
| 5  | 0.411538 | C | 1 |
| 18 | 0.312977 | C | 1 |
| 5  | 0.36619  | I | 0 |
| 3  | 0.162197 | C | 1 |
| 6  | 0.358148 | C | 1 |
| 3  | 0.162197 | C | 1 |
| 6  | 0.358148 | C | 1 |
| 6  | 0.358148 | C | 1 |
| 5  | 0.068284 | R | 0 |
| 3  | 0.162197 | C | 1 |
| 5  | 0.200623 | I | 0 |
| 4  | 0.24828  | C | 1 |
| 6  | 0.358148 | C | 1 |
| 3  | 0.162197 | C | 1 |
| 18 | 0.312977 | C | 1 |
| 4  | 0.24828  | C | 1 |
| 5  | 0.411538 | C | 1 |
| 4  | 0.069712 | C | 1 |
| 7  | 0.430142 | C | 1 |
| 5  | 0.412786 | C | 1 |
| 5  | 0.462497 | C | 1 |
| 11 | 0.461471 | C | 1 |
| 5  | 0.462497 | C | 1 |
| 4  | 0.069712 | C | 1 |
| 4  | 0.29374  | C | 1 |
| 11 | 0.461471 | C | 1 |
| 4  | 0.24828  | C | 1 |
| 18 | 0.312977 | C | 1 |
| 7  | 0.430142 | C | 1 |
| 11 | 0.461471 | C | 1 |
| 18 | 0.312977 | C | 1 |
| 5  | 0.411538 | C | 1 |
| 6  | 0.358148 | C | 1 |
| 5  | 0.36619  | I | 0 |
| 6  | 0.358148 | C | 1 |
| 5  | 0.068284 | R | 0 |
| 4  | 0.069712 | C | 1 |
| 4  | 0.24828  | C | 1 |
| 4  | 0.29374  | C | 1 |
| 5  | 0.36619  | I | 0 |
| 5  | 0.36619  | I | 0 |
| 7  | 0.430142 | C | 1 |

|    |          |   |   |
|----|----------|---|---|
| 19 | 0.472275 | I | 0 |
| 3  | 0.625987 | C | 1 |
| 1  | 0.288974 | C | 1 |
| 3  | 0.182558 | I | 0 |
| 19 | 0.472275 | I | 0 |
| 6  | 0.195765 | C | 1 |
| 19 | 0.89864  | C | 1 |
| 19 | 0.89864  | C | 1 |
| 19 | 0.472275 | I | 0 |
| 23 | 0.923242 | C | 1 |
| 19 | 0.723788 | C | 1 |
| 3  | 0.182558 | I | 0 |
| 3  | 0.47433  | C | 1 |
| 18 | 0.597846 | C | 1 |
| 6  | 0.195765 | C | 1 |
| 3  | 0.182558 | I | 0 |
| 6  | 0.195765 | C | 1 |
| 19 | 0.89864  | C | 1 |
| 19 | 0.723788 | C | 1 |
| 19 | 0.472275 | I | 0 |
| 6  | 0.195765 | C | 1 |
| 19 | 0.472275 | I | 0 |
| 6  | 0.195765 | C | 1 |
| 19 | 0.89864  | C | 1 |
| 18 | 0.597846 | C | 1 |
| 6  | 0.195765 | C | 1 |
| 3  | 0.182558 | I | 0 |
| 19 | 0.472275 | I | 0 |
| 19 | 0.472275 | I | 0 |
| 23 | 0.923242 | C | 1 |
| 19 | 0.89864  | C | 1 |
| 19 | 0.89864  | C | 1 |
| 6  | 0.195765 | C | 1 |
| 19 | 0.723788 | C | 1 |
| 18 | 0.597846 | C | 1 |
| 19 | 0.723788 | C | 1 |
| 3  | 0.47433  | C | 1 |
| 18 | 0.597846 | C | 1 |
| 3  | 0.625987 | C | 1 |
| 3  | 0.182558 | I | 0 |
| 19 | 0.472275 | I | 0 |
| 3  | 0.47433  | C | 1 |
| 7  | 0.220653 | C | 1 |
| 19 | 0.723788 | C | 1 |
| 19 | 0.723788 | C | 1 |
| 7  | 0.220653 | C | 1 |
| 6  | 0.195765 | C | 1 |
| 1  | 0.288974 | C | 1 |
| 1  | 0.288974 | C | 1 |
| 23 | 0.923242 | C | 1 |
| 19 | 0.472275 | I | 0 |
| 19 | 0.723788 | C | 1 |
| 19 | 0.472275 | I | 0 |
| 1  | 0.288974 | C | 1 |



|    |          |   |   |
|----|----------|---|---|
| 3  | 0.47433  | C | 1 |
| 18 | 0.597846 | C | 1 |
| 6  | 0.195765 | C | 1 |
| 1  | 0.288974 | C | 1 |
| 6  | 0.195765 | C | 1 |
| 1  | 0.288974 | C | 1 |
| 23 | 0.923242 | C | 1 |
| 23 | 0.923242 | C | 1 |
| 1  | 0.288974 | C | 1 |
| 6  | 0.195765 | C | 1 |
| 19 | 0.723788 | C | 1 |
| 19 | 0.89864  | C | 1 |
| 18 | 0.597846 | C | 1 |
| 19 | 0.723788 | C | 1 |
| 19 | 0.472275 | I | 0 |
| 1  | 0.288974 | C | 1 |
| 23 | 0.923242 | C | 1 |
| 1  | 0.288974 | C | 1 |
| 19 | 0.472275 | I | 0 |
| 23 | 0.923242 | C | 1 |
| 19 | 0.472275 | I | 0 |
| 7  | 0.220653 | C | 1 |
| 19 | 0.89864  | C | 1 |
| 1  | 0.288974 | C | 1 |
| 19 | 0.723788 | C | 1 |
| 23 | 0.923242 | C | 1 |
| 23 | 0.923242 | C | 1 |
| 7  | 0.220653 | C | 1 |
| 1  | 0.288974 | C | 1 |
| 19 | 0.472275 | I | 0 |
| 3  | 0.47433  | C | 1 |
| 7  | 0.220653 | C | 1 |
| 3  | 0.625987 | C | 1 |
| 15 | 0.692515 | C | 1 |
| 15 | 0.692515 | C | 1 |
| 5  | 0.383494 | C | 1 |
| 15 | 0.692515 | C | 1 |
| 5  | 0.383494 | C | 1 |
| 8  | 0.264277 | C | 1 |
| 8  | 0.264277 | C | 1 |
| 15 | 0.692515 | C | 1 |
| 8  | 0.264277 | C | 1 |
| 5  | 0.383494 | C | 1 |
| 8  | 0.264277 | C | 1 |
| 15 | 0.692515 | C | 1 |
| 8  | 0.264277 | C | 1 |
| 5  | 0.383494 | C | 1 |
| 5  | 0.196114 | C | 1 |
| 11 | 0.314665 | C | 1 |
| 3  | 0.376356 | C | 1 |
| 12 | 0.068284 | C | 1 |
| 12 | 0.068284 | C | 1 |
| 4  | 0.229672 | C | 1 |
| 4  | 0.406123 | C | 1 |

|    |          |   |   |
|----|----------|---|---|
| 8  | 0.25189  | I | 0 |
| 11 | 0.314665 | C | 1 |
| 8  | 0.25189  | I | 0 |
| 11 | 0.314665 | C | 1 |
| 1  | 0.50604  | C | 1 |
| 9  | 0.294807 | C | 1 |
| 4  | 0.406123 | C | 1 |
| 5  | 0.196114 | C | 1 |
| 9  | 0.294807 | C | 1 |
| 4  | 0.229672 | C | 1 |
| 8  | 0.25189  | I | 0 |
| 11 | 0.359944 | C | 1 |
| 1  | 0.50604  | C | 1 |
| 3  | 0.376356 | C | 1 |
| 3  | 0.376356 | C | 1 |
| 5  | 0.196114 | C | 1 |
| 12 | 0.068284 | C | 1 |
| 5  | 0.196114 | C | 1 |
| 8  | 0.25189  | I | 0 |
| 4  | 0.406123 | C | 1 |
| 5  | 0.196114 | C | 1 |
| 5  | 0.196114 | C | 1 |
| 4  | 0.229672 | C | 1 |
| 1  | 0.50604  | C | 1 |
| 1  | 0.292099 | I | 0 |
| 1  | 0.292099 | I | 0 |
| 12 | 0.068284 | C | 1 |
| 4  | 0.406123 | C | 1 |
| 9  | 0.294807 | C | 1 |
| 12 | 0.068284 | C | 1 |
| 8  | 0.25189  | I | 0 |
| 9  | 0.294807 | C | 1 |
| 1  | 0.292099 | I | 0 |
| 1  | 0.292099 | I | 0 |
| 11 | 0.359944 | C | 1 |
| 1  | 0.292099 | I | 0 |
| 9  | 0.294807 | C | 1 |
| 8  | 0.25189  | I | 0 |
| 5  | 0.196114 | C | 1 |
| 4  | 0.406123 | C | 1 |
| 4  | 0.406123 | C | 1 |
| 11 | 0.359944 | C | 1 |
| 5  | 0.196114 | C | 1 |
| 5  | 0.196114 | C | 1 |
| 19 | 0.468232 | I | 0 |
| 19 | 0.468232 | I | 0 |
| 19 | 0.468232 | I | 0 |
| 19 | 0.468232 | I | 0 |
| 5  | 0.087626 | C | 1 |
| 19 | 0.468232 | I | 0 |
| 19 | 0.468232 | I | 0 |
| 5  | 0.087626 | C | 1 |
| 5  | 0.087626 | C | 1 |
| 5  | 0.087626 | C | 1 |

|    |          |   |   |
|----|----------|---|---|
| 5  | 0.087626 | C | 1 |
| 5  | 0.087626 | C | 1 |
| 19 | 0.468232 | I | 0 |
| 21 | 0.213882 | C | 1 |
| 7  | 0.246862 | C | 1 |
| 21 | 0.213882 | C | 1 |
| 7  | 0.246862 | C | 1 |
| 21 | 0.213882 | C | 1 |
| 7  | 0.246862 | C | 1 |
| 21 | 0.213882 | C | 1 |
| 7  | 0.246862 | C | 1 |
| 21 | 0.213882 | C | 1 |
| 7  | 0.246862 | C | 1 |
| 7  | 0.246862 | C | 1 |
| 4  | 0.172629 | C | 1 |
| 8  | 0.483099 | C | 1 |
| 3  | 0.593249 | C | 1 |
| 4  | 0.172629 | C | 1 |
| 3  | 0.593249 | C | 1 |
| 10 | 0.456492 | C | 1 |
| 4  | 0.172629 | C | 1 |
| 4  | 0.32678  | C | 1 |
| 10 | 0.456492 | C | 1 |
| 10 | 0.456492 | C | 1 |
| 3  | 0.593249 | C | 1 |
| 3  | 0.593249 | C | 1 |
| 4  | 0.172629 | C | 1 |
| 3  | 0.593249 | C | 1 |
| 8  | 0.483099 | C | 1 |
| 4  | 0.32678  | C | 1 |
| 3  | 0.593249 | C | 1 |
| 10 | 0.456492 | C | 1 |
| 20 | 0.788175 | C | 1 |
| 4  | 0.172629 | C | 1 |
| 20 | 0.788175 | C | 1 |
| 4  | 0.293239 | C | 1 |
| 4  | 0.32678  | C | 1 |
| 8  | 0.483099 | C | 1 |
| 8  | 0.483099 | C | 1 |
| 4  | 0.172629 | C | 1 |
| 3  | 0.576799 | C | 1 |
| 3  | 0.576799 | C | 1 |
| 3  | 0.576799 | C | 1 |
| 4  | 0.32678  | C | 1 |
| 3  | 0.593249 | C | 1 |
| 4  | 0.32678  | C | 1 |
| 3  | 0.593249 | C | 1 |
| 3  | 0.423044 | B | 1 |
| 20 | 0.788175 | C | 1 |
| 10 | 0.456492 | C | 1 |
| 3  | 0.423044 | B | 1 |
| 4  | 0.172629 | C | 1 |
| 8  | 0.483099 | C | 1 |
| 3  | 0.423044 | B | 1 |

|    |          |   |   |
|----|----------|---|---|
| 3  | 0.423044 | B | 1 |
| 4  | 0.172629 | C | 1 |
| 8  | 0.483099 | C | 1 |
| 4  | 0.293239 | C | 1 |
| 4  | 0.293239 | C | 1 |
| 8  | 0.483099 | C | 1 |
| 4  | 0.32678  | C | 1 |
| 3  | 0.423044 | B | 1 |
| 4  | 0.32678  | C | 1 |
| 4  | 0.172629 | C | 1 |
| 8  | 0.483099 | C | 1 |
| 3  | 0.576799 | C | 1 |
| 8  | 0.483099 | C | 1 |
| 3  | 0.576799 | C | 1 |
| 3  | 0.423044 | B | 1 |
| 3  | 0.423044 | B | 1 |
| 8  | 0.483099 | C | 1 |
| 8  | 0.483099 | C | 1 |
| 20 | 0.788175 | C | 1 |
| 3  | 0.423044 | B | 1 |
| 4  | 0.32678  | C | 1 |
| 20 | 0.788175 | C | 1 |
| 8  | 0.483099 | C | 1 |
| 3  | 0.576799 | C | 1 |
| 8  | 0.265473 | C | 1 |
| 15 | 0.636561 | C | 1 |
| 12 | 0.546382 | B | 1 |
| 12 | 0.546382 | B | 1 |
| 11 | 0.566167 | C | 1 |
| 18 | 0.708156 | E | 1 |
| 5  | 0.329363 | C | 1 |
| 4  | 0.228148 | C | 1 |
| 5  | 0.329363 | C | 1 |
| 15 | 0.636561 | C | 1 |
| 8  | 0.265473 | C | 1 |
| 13 | 0.455592 | G | 0 |
| 8  | 0.265473 | C | 1 |
| 7  | 0.429839 | C | 1 |
| 7  | 0.429839 | C | 1 |
| 11 | 0.566167 | C | 1 |
| 15 | 0.636561 | C | 1 |
| 7  | 0.173641 | C | 1 |
| 8  | 0.265473 | C | 1 |
| 15 | 0.636561 | C | 1 |
| 8  | 0.265473 | C | 1 |
| 13 | 0.455592 | G | 0 |
| 7  | 0.429839 | C | 1 |
| 18 | 0.708156 | E | 1 |
| 7  | 0.429839 | C | 1 |
| 11 | 0.566167 | C | 1 |
| 12 | 0.546382 | B | 1 |
| 7  | 0.173641 | C | 1 |
| 15 | 0.636561 | C | 1 |
| 7  | 0.429839 | C | 1 |

|    |          |   |   |
|----|----------|---|---|
| 13 | 0.455592 | G | 0 |
| 7  | 0.429839 | C | 1 |
| 5  | 0.329363 | C | 1 |
| 13 | 0.455592 | G | 0 |
| 8  | 0.265473 | C | 1 |
| 7  | 0.173641 | C | 1 |
| 4  | 0.228148 | C | 1 |
| 11 | 0.566167 | C | 1 |
| 7  | 0.429839 | C | 1 |
| 7  | 0.429839 | C | 1 |
| 18 | 0.708156 | E | 1 |
| 13 | 0.455592 | G | 0 |
| 13 | 0.455592 | G | 0 |
| 7  | 0.173641 | C | 1 |
| 8  | 0.265473 | C | 1 |
| 7  | 0.429839 | C | 1 |
| 5  | 0.329363 | C | 1 |
| 8  | 0.265473 | C | 1 |
| 11 | 0.566167 | C | 1 |
| 8  | 0.265473 | C | 1 |
| 5  | 0.329363 | C | 1 |
| 4  | 0.228148 | C | 1 |
| 11 | 0.566167 | C | 1 |
| 11 | 0.566167 | C | 1 |
| 5  | 0.329363 | C | 1 |
| 4  | 0.228148 | C | 1 |
| 7  | 0.173641 | C | 1 |
| 12 | 0.546382 | B | 1 |
| 12 | 0.546382 | B | 1 |
| 8  | 0.265473 | C | 1 |
| 12 | 0.546382 | B | 1 |
| 13 | 0.455592 | G | 0 |
| 5  | 0.329363 | C | 1 |
| 8  | 0.265473 | C | 1 |
| 4  | 0.228148 | C | 1 |
| 8  | 0.265473 | C | 1 |
| 15 | 0.636561 | C | 1 |
| 7  | 0.429839 | C | 1 |
| 7  | 0.429839 | C | 1 |
| 12 | 0.546382 | B | 1 |
| 11 | 0.566167 | C | 1 |
| 13 | 0.455592 | G | 0 |
| 7  | 0.429839 | C | 1 |
| 8  | 0.265473 | C | 1 |
| 18 | 0.708156 | E | 1 |
| 7  | 0.173641 | C | 1 |
| 15 | 0.636561 | C | 1 |
| 11 | 0.566167 | C | 1 |
| 4  | 0.373051 | C | 1 |
| 9  | 0.625026 | C | 1 |
| 8  | 0.642223 | C | 1 |
| 9  | 0.625026 | C | 1 |
| 4  | 0.373051 | C | 1 |
| 18 | 0.525846 | C | 1 |

|    |          |   |   |
|----|----------|---|---|
| 9  | 0.625026 | C | 1 |
| 18 | 0.628449 | C | 1 |
| 18 | 0.525846 | C | 1 |
| 9  | 0.625026 | C | 1 |
| 18 | 0.525846 | C | 1 |
| 9  | 0.625026 | C | 1 |
| 9  | 0.625026 | C | 1 |
| 18 | 0.628449 | C | 1 |
| 18 | 0.628449 | C | 1 |
| 18 | 0.525846 | C | 1 |
| 18 | 0.525846 | C | 1 |
| 8  | 0.642223 | C | 1 |
| 8  | 0.642223 | C | 1 |
| 9  | 0.625026 | C | 1 |
| 18 | 0.628449 | C | 1 |
| 18 | 0.525846 | C | 1 |
| 18 | 0.525846 | C | 1 |
| 18 | 0.628449 | C | 1 |
| 18 | 0.525846 | C | 1 |
| 18 | 0.628449 | C | 1 |
| 4  | 0.373051 | C | 1 |
| 9  | 0.625026 | C | 1 |
| 18 | 0.628449 | C | 1 |
| 9  | 0.625026 | C | 1 |
| 18 | 0.525846 | C | 1 |
| 8  | 0.642223 | C | 1 |
| 9  | 0.625026 | C | 1 |
| 8  | 0.642223 | C | 1 |
| 5  | 0.118786 | C | 1 |
| 15 | 0.77835  | B | 1 |
| 15 | 0.323629 | C | 1 |
| 15 | 0.77835  | B | 1 |
| 5  | 0.118786 | C | 1 |
| 5  | 0.118786 | C | 1 |
| 5  | 0.118786 | C | 1 |
| 21 | 0.44184  | C | 1 |
| 21 | 0.44184  | C | 1 |
| 18 | 0.263074 | R | 0 |
| 5  | 0.118786 | C | 1 |
| 18 | 0.263074 | R | 0 |
| 19 | 0.49342  | C | 1 |
| 19 | 0.49342  | C | 1 |
| 3  | 0.401607 | C | 1 |
| 19 | 0.49342  | C | 1 |
| 21 | 0.480438 | C | 1 |
| 3  | 0.401607 | C | 1 |
| 21 | 0.44184  | C | 1 |
| 18 | 0.263074 | R | 0 |
| 4  | 0.100483 | A | 0 |
| 19 | 0.49342  | C | 1 |
| 4  | 0.100483 | A | 0 |
| 3  | 0.401607 | C | 1 |
| 15 | 0.323629 | C | 1 |
| 15 | 0.77835  | B | 1 |

|    |          |   |   |
|----|----------|---|---|
| 15 | 0.77835  | B | 1 |
| 15 | 0.77835  | B | 1 |
| 15 | 0.77835  | B | 1 |
| 21 | 0.44184  | C | 1 |
| 18 | 0.263074 | R | 0 |
| 18 | 0.263074 | R | 0 |
| 21 | 0.480438 | C | 1 |
| 21 | 0.44184  | C | 1 |
| 21 | 0.480438 | C | 1 |
| 21 | 0.44184  | C | 1 |
| 3  | 0.401607 | C | 1 |
| 19 | 0.49342  | C | 1 |
| 21 | 0.480438 | C | 1 |
| 21 | 0.44184  | C | 1 |
| 21 | 0.480438 | C | 1 |
| 15 | 0.323629 | C | 1 |
| 21 | 0.480438 | C | 1 |
| 5  | 0.118786 | C | 1 |
| 19 | 0.49342  | C | 1 |
| 21 | 0.480438 | C | 1 |
| 18 | 0.263074 | R | 0 |
| 21 | 0.44184  | C | 1 |
| 21 | 0.44184  | C | 1 |
| 4  | 0.100483 | A | 0 |
| 19 | 0.49342  | C | 1 |
| 21 | 0.44184  | C | 1 |
| 15 | 0.323629 | C | 1 |
| 18 | 0.263074 | R | 0 |
| 5  | 0.118786 | C | 1 |
| 15 | 0.323629 | C | 1 |
| 19 | 0.49342  | C | 1 |
| 19 | 0.49342  | C | 1 |
| 19 | 0.49342  | C | 1 |
| 21 | 0.480438 | C | 1 |
| 19 | 0.49342  | C | 1 |
| 3  | 0.401607 | C | 1 |
| 21 | 0.480438 | C | 1 |
| 15 | 0.77835  | B | 1 |
| 21 | 0.480438 | C | 1 |
| 21 | 0.480438 | C | 1 |
| 21 | 0.480438 | C | 1 |
| 19 | 0.49342  | C | 1 |
| 15 | 0.77835  | B | 1 |
| 19 | 0.327779 | S | 0 |
| 19 | 0.327779 | S | 0 |
| 19 | 0.327779 | S | 0 |
| 5  | 0.209375 | C | 1 |
| 5  | 0.304066 | C | 1 |
| 19 | 0.327779 | S | 0 |
| 15 | 0.199597 | C | 1 |
| 5  | 0.182096 | C | 1 |
| 15 | 0.199597 | C | 1 |
| 13 | 0.57967  | C | 1 |
| 4  | 0.34361  | C | 1 |

|    |          |   |   |
|----|----------|---|---|
| 5  | 0.172854 | M | 0 |
| 4  | 0.34361  | C | 1 |
| 5  | 0.182096 | C | 1 |
| 4  | 0.34361  | C | 1 |
| 4  | 0.112561 | C | 1 |
| 13 | 0.596122 | C | 1 |
| 5  | 0.172854 | M | 0 |
| 9  | 0.237406 | C | 1 |
| 5  | 0.172854 | M | 0 |
| 13 | 0.596122 | C | 1 |
| 19 | 0.327779 | S | 0 |
| 13 | 0.596122 | C | 1 |
| 5  | 0.304066 | C | 1 |
| 5  | 0.209375 | C | 1 |
| 5  | 0.172854 | M | 0 |
| 13 | 0.596122 | C | 1 |
| 13 | 0.596122 | C | 1 |
| 9  | 0.237406 | C | 1 |
| 4  | 0.112561 | C | 1 |
| 3  | 0.314205 | I | 0 |
| 3  | 0.314205 | I | 0 |
| 19 | 0.327779 | S | 0 |
| 13 | 0.596122 | C | 1 |
| 13 | 0.57967  | C | 1 |
| 13 | 0.596122 | C | 1 |
| 19 | 0.327779 | S | 0 |
| 19 | 0.327779 | S | 0 |
| 13 | 0.596122 | C | 1 |
| 13 | 0.596122 | C | 1 |
| 5  | 0.172854 | M | 0 |
| 19 | 0.327779 | S | 0 |
| 19 | 0.327779 | S | 0 |
| 19 | 0.327779 | S | 0 |
| 19 | 0.327779 | S | 0 |
| 13 | 0.596122 | C | 1 |
| 13 | 0.596122 | C | 1 |
| 13 | 0.57967  | C | 1 |
| 4  | 0.34361  | C | 1 |
| 5  | 0.182096 | C | 1 |
| 5  | 0.209375 | C | 1 |
| 13 | 0.57967  | C | 1 |
| 19 | 0.327779 | S | 0 |
| 3  | 0.403752 | C | 1 |
| 5  | 0.209375 | C | 1 |
| 5  | 0.209375 | C | 1 |
| 13 | 0.596122 | C | 1 |
| 15 | 0.199597 | C | 1 |
| 5  | 0.304066 | C | 1 |
| 13 | 0.57967  | C | 1 |
| 9  | 0.237406 | C | 1 |
| 4  | 0.112561 | C | 1 |
| 4  | 0.34361  | C | 1 |
| 3  | 0.403752 | C | 1 |
| 13 | 0.596122 | C | 1 |



|    |          |   |   |
|----|----------|---|---|
| 19 | 0.327779 | S | 0 |
| 15 | 0.199597 | C | 1 |
| 13 | 0.596122 | C | 1 |
| 19 | 0.327779 | S | 0 |
| 5  | 0.304066 | C | 1 |
| 4  | 0.112561 | C | 1 |
| 19 | 0.327779 | S | 0 |
| 19 | 0.327779 | S | 0 |
| 19 | 0.327779 | S | 0 |
| 13 | 0.57967  | C | 1 |
| 19 | 0.327779 | S | 0 |
| 13 | 0.596122 | C | 1 |
| 4  | 0.34361  | C | 1 |
| 5  | 0.172854 | M | 0 |
| 13 | 0.57967  | C | 1 |
| 4  | 0.112561 | C | 1 |
| 19 | 0.327779 | S | 0 |
| 19 | 0.327779 | S | 0 |
| 19 | 0.327779 | S | 0 |
| 19 | 0.327779 | S | 0 |
| 19 | 0.327779 | S | 0 |
| 5  | 0.209375 | C | 1 |
| 3  | 0.314205 | I | 0 |
| 5  | 0.209375 | C | 1 |
| 13 | 0.57967  | C | 1 |
| 5  | 0.182096 | C | 1 |
| 5  | 0.304066 | C | 1 |
| 4  | 0.34361  | C | 1 |
| 5  | 0.304066 | C | 1 |
| 13 | 0.596122 | C | 1 |
| 13 | 0.596122 | C | 1 |
| 4  | 0.34361  | C | 1 |
| 4  | 0.34361  | C | 1 |
| 3  | 0.314205 | I | 0 |
| 9  | 0.237406 | C | 1 |
| 13 | 0.596122 | C | 1 |
| 19 | 0.327779 | S | 0 |
| 19 | 0.327779 | S | 0 |
| 19 | 0.327779 | S | 0 |
| 19 | 0.327779 | S | 0 |
| 13 | 0.596122 | C | 1 |
| 4  | 0.112561 | C | 1 |
| 5  | 0.172854 | M | 0 |
| 5  | 0.182096 | C | 1 |
| 13 | 0.596122 | C | 1 |
| 19 | 0.327779 | S | 0 |
| 5  | 0.209375 | C | 1 |
| 19 | 0.327779 | S | 0 |
| 19 | 0.327779 | S | 0 |
| 9  | 0.237406 | C | 1 |
| 13 | 0.596122 | C | 1 |
| 13 | 0.596122 | C | 1 |
| 15 | 0.199597 | C | 1 |
| 4  | 0.112561 | C | 1 |

|    |          |   |   |
|----|----------|---|---|
| 3  | 0.403752 | C | 1 |
| 4  | 0.34361  | C | 1 |
| 5  | 0.172854 | M | 0 |
| 13 | 0.596122 | C | 1 |
| 10 | 0.601403 | C | 1 |
| 10 | 0.601403 | C | 1 |
| 10 | 0.601403 | C | 1 |
| 1  | 0.254725 | C | 1 |
| 1  | 0.254725 | C | 1 |
| 1  | 0.254725 | C | 1 |
| 5  | 0.41285  | C | 1 |
| 3  | 0.330812 | C | 1 |
| 6  | 0.454352 | C | 1 |
| 6  | 0.454352 | C | 1 |
| 3  | 0.243275 | C | 1 |
| 15 | 0.42384  | C | 1 |
| 1  | 0.343679 | C | 1 |
| 8  | 0.383003 | C | 1 |
| 15 | 0.42384  | C | 1 |
| 6  | 0.454352 | C | 1 |
| 5  | 0.41285  | C | 1 |
| 6  | 0.454352 | C | 1 |
| 8  | 0.383003 | C | 1 |
| 3  | 0.205168 | I | 0 |
| 1  | 0.343679 | C | 1 |
| 15 | 0.42384  | C | 1 |
| 8  | 0.383003 | C | 1 |
| 1  | 0.262975 | C | 1 |
| 1  | 0.262975 | C | 1 |
| 6  | 0.454352 | C | 1 |
| 6  | 0.454352 | C | 1 |
| 3  | 0.330812 | C | 1 |
| 3  | 0.243275 | C | 1 |
| 5  | 0.41285  | C | 1 |
| 3  | 0.243275 | C | 1 |
| 8  | 0.383003 | C | 1 |
| 3  | 0.205168 | I | 0 |
| 3  | 0.205168 | I | 0 |
| 4  | 0.199829 | B | 1 |
| 6  | 0.454352 | C | 1 |
| 8  | 0.383003 | C | 1 |
| 15 | 0.42384  | C | 1 |
| 8  | 0.383003 | C | 1 |
| 8  | 0.383003 | C | 1 |
| 8  | 0.383003 | C | 1 |
| 5  | 0.41285  | C | 1 |
| 15 | 0.42384  | C | 1 |
| 15 | 0.42384  | C | 1 |
| 1  | 0.343679 | C | 1 |
| 3  | 0.243275 | C | 1 |
| 5  | 0.41285  | C | 1 |
| 8  | 0.383003 | C | 1 |
| 5  | 0.41285  | C | 1 |
| 6  | 0.454352 | C | 1 |

|    |          |   |   |
|----|----------|---|---|
| 1  | 0.343679 | C | 1 |
| 3  | 0.205168 | I | 0 |
| 3  | 0.205168 | I | 0 |
| 15 | 0.42384  | C | 1 |
| 6  | 0.454352 | C | 1 |
| 9  | 0.377156 | C | 1 |
| 4  | 0.205422 | C | 1 |
| 5  | 0.41285  | C | 1 |
| 6  | 0.454352 | C | 1 |
| 1  | 0.262975 | C | 1 |
| 1  | 0.343679 | C | 1 |
| 9  | 0.377156 | C | 1 |
| 5  | 0.41285  | C | 1 |
| 15 | 0.42384  | C | 1 |
| 3  | 0.275893 | C | 1 |
| 5  | 0.41285  | C | 1 |
| 15 | 0.42384  | C | 1 |
| 3  | 0.243275 | C | 1 |
| 4  | 0.199829 | B | 1 |
| 1  | 0.262975 | C | 1 |
| 3  | 0.243275 | C | 1 |
| 5  | 0.41285  | C | 1 |
| 5  | 0.41285  | C | 1 |
| 4  | 0.199829 | B | 1 |
| 4  | 0.199829 | B | 1 |
| 1  | 0.343679 | C | 1 |
| 5  | 0.41285  | C | 1 |
| 15 | 0.42384  | C | 1 |
| 3  | 0.205168 | I | 0 |
| 1  | 0.262975 | C | 1 |
| 3  | 0.275893 | C | 1 |
| 3  | 0.275893 | C | 1 |
| 1  | 0.343679 | C | 1 |
| 6  | 0.454352 | C | 1 |
| 5  | 0.41285  | C | 1 |
| 4  | 0.199829 | B | 1 |
| 9  | 0.377156 | C | 1 |
| 4  | 0.199829 | B | 1 |
| 4  | 0.205422 | C | 1 |
| 3  | 0.330812 | C | 1 |
| 4  | 0.205422 | C | 1 |
| 4  | 0.199829 | B | 1 |
| 1  | 0.262975 | C | 1 |
| 10 | 0.213184 | C | 1 |
| 5  | 0.23129  | C | 1 |
| 5  | 0.297506 | C | 1 |
| 6  | 0.301311 | C | 1 |
| 5  | 0.297506 | C | 1 |
| 11 | 0.380993 | N | 0 |
| 16 | 0.365219 | C | 1 |
| 16 | 0.365219 | C | 1 |
| 6  | 0.301311 | C | 1 |
| 6  | 0.301311 | C | 1 |
| 11 | 0.380993 | N | 0 |

|    |          |   |   |
|----|----------|---|---|
| 16 | 0.365219 | C | 1 |
| 5  | 0.23129  | C | 1 |
| 9  | 0.167122 | C | 1 |
| 5  | 0.23129  | C | 1 |
| 10 | 0.213184 | C | 1 |
| 5  | 0.23129  | C | 1 |
| 10 | 0.213184 | C | 1 |
| 6  | 0.301311 | C | 1 |
| 9  | 0.167122 | C | 1 |
| 9  | 0.167122 | C | 1 |
| 11 | 0.380993 | N | 0 |
| 16 | 0.365219 | C | 1 |
| 16 | 0.365219 | C | 1 |
| 9  | 0.167122 | C | 1 |
| 16 | 0.365219 | C | 1 |
| 10 | 0.213184 | C | 1 |
| 16 | 0.365219 | C | 1 |
| 11 | 0.380993 | N | 0 |
| 5  | 0.297506 | C | 1 |
| 11 | 0.380993 | N | 0 |
| 5  | 0.23129  | C | 1 |
| 11 | 0.380993 | N | 0 |
| 5  | 0.23129  | C | 1 |
| 6  | 0.301311 | C | 1 |
| 9  | 0.167122 | C | 1 |
| 5  | 0.23129  | C | 1 |
| 16 | 0.365219 | C | 1 |
| 16 | 0.365219 | C | 1 |
| 6  | 0.301311 | C | 1 |
| 5  | 0.297506 | C | 1 |
| 6  | 0.301311 | C | 1 |
| 5  | 0.297506 | C | 1 |
| 10 | 0.213184 | C | 1 |
| 6  | 0.301311 | C | 1 |
| 16 | 0.365219 | C | 1 |
| 11 | 0.380993 | N | 0 |
| 12 | 0.385811 | C | 1 |
| 12 | 0.385811 | C | 1 |
| 12 | 0.385811 | C | 1 |
| 12 | 0.385811 | C | 1 |
| 12 | 0.385811 | C | 1 |
| 17 | 0.396347 | C | 1 |
| 4  | 0.3964   | C | 1 |
| 4  | 0.3964   | C | 1 |
| 17 | 0.396347 | C | 1 |
| 4  | 0.3964   | C | 1 |
| 17 | 0.396347 | C | 1 |
| 4  | 0.317962 | C | 1 |
| 17 | 0.396347 | C | 1 |
| 17 | 0.396347 | C | 1 |
| 4  | 0.3964   | C | 1 |
| 17 | 0.396347 | C | 1 |
| 4  | 0.317962 | C | 1 |
| 4  | 0.317962 | C | 1 |

|    |          |   |   |
|----|----------|---|---|
| 17 | 0.396347 | C | 1 |
| 4  | 0.3964   | C | 1 |
| 14 | 0.655139 | C | 1 |
| 19 | 0.219564 | C | 1 |
| 5  | 0.338174 | C | 1 |
| 14 | 0.655139 | C | 1 |
| 11 | 0.304522 | C | 1 |
| 5  | 0.338174 | C | 1 |
| 5  | 0.338174 | C | 1 |
| 11 | 0.304522 | C | 1 |
| 19 | 0.219564 | C | 1 |
| 11 | 0.304522 | C | 1 |
| 5  | 0.338174 | C | 1 |
| 5  | 0.338174 | C | 1 |
| 14 | 0.655139 | C | 1 |
| 19 | 0.219564 | C | 1 |
| 5  | 0.338174 | C | 1 |
| 5  | 0.338174 | C | 1 |
| 14 | 0.655139 | C | 1 |
| 11 | 0.304522 | C | 1 |
| 5  | 0.338174 | C | 1 |
| 11 | 0.304522 | C | 1 |
| 14 | 0.655139 | C | 1 |
| 17 | 0.227137 | C | 1 |
| 17 | 0.227137 | C | 1 |
| 17 | 0.227137 | C | 1 |
| 17 | 0.227137 | C | 1 |
| 17 | 0.227137 | C | 1 |
| 17 | 0.227137 | C | 1 |
| 17 | 0.227137 | C | 1 |
| 17 | 0.227137 | C | 1 |
| 17 | 0.227137 | C | 1 |
| 17 | 0.227137 | C | 1 |
| 12 | 0.185354 | C | 1 |
| 13 | 0.251747 | C | 1 |
| 13 | 0.251747 | C | 1 |
| 12 | 0.185354 | C | 1 |
| 13 | 0.251747 | C | 1 |
| 12 | 0.185354 | C | 1 |
| 12 | 0.185354 | C | 1 |
| 13 | 0.251747 | C | 1 |
| 12 | 0.185354 | C | 1 |
| 12 | 0.185354 | C | 1 |
| 12 | 0.185354 | C | 1 |
| 12 | 0.185354 | C | 1 |
| 13 | 0.251747 | C | 1 |
| 12 | 0.185354 | C | 1 |
| 13 | 0.251747 | C | 1 |
| 13 | 0.251747 | C | 1 |
| 5  | 0.069407 | C | 1 |
| 14 | 0.38371  | C | 1 |
| 5  | 0.069407 | C | 1 |
| 5  | 0.069407 | C | 1 |
| 14 | 0.38371  | C | 1 |
| 14 | 0.38371  | C | 1 |

|    |          |   |   |
|----|----------|---|---|
| 14 | 0.38371  | C | 1 |
| 5  | 0.069407 | C | 1 |
| 14 | 0.38371  | C | 1 |
| 5  | 0.069407 | C | 1 |
| 14 | 0.38371  | C | 1 |
| 5  | 0.327874 | C | 1 |
| 1  | 0.137428 | C | 1 |
| 1  | 0.137428 | C | 1 |
| 1  | 0.137428 | C | 1 |
| 1  | 0.137428 | C | 1 |
| 5  | 0.327874 | C | 1 |
| 5  | 0.327874 | C | 1 |
| 1  | 0.137428 | C | 1 |
| 5  | 0.327874 | C | 1 |
| 5  | 0.327874 | C | 1 |
| 7  | 0.488975 | C | 1 |
| 7  | 0.488975 | C | 1 |
| 7  | 0.488975 | C | 1 |
| 7  | 0.488975 | C | 1 |
| 7  | 0.488975 | C | 1 |
| 7  | 0.488975 | C | 1 |
| 7  | 0.488975 | C | 1 |
| 7  | 0.488975 | C | 1 |
| 7  | 0.488975 | C | 1 |
| 7  | 0.488975 | C | 1 |
| 7  | 0.488975 | C | 1 |
| 7  | 0.488975 | C | 1 |
| 7  | 0.488975 | C | 1 |
| 7  | 0.488975 | C | 1 |
| 5  | 0.248274 | C | 1 |
| 5  | 0.248274 | C | 1 |
| 17 | 0.528854 | C | 1 |
| 3  | 0.122431 | C | 1 |
| 7  | 0.176163 | C | 1 |
| 4  | 0.138963 | C | 1 |
| 7  | 0.176163 | C | 1 |
| 16 | 0.266583 | C | 1 |
| 5  | 0.227837 | C | 1 |
| 5  | 0.248274 | C | 1 |
| 3  | 0.145178 | C | 1 |
| 14 | 0.689919 | C | 1 |
| 4  | 0.138963 | C | 1 |
| 7  | 0.688583 | C | 1 |
| 3  | 0.122431 | C | 1 |
| 14 | 0.689919 | C | 1 |
| 4  | 0.286113 | C | 1 |
| 5  | 0.227837 | C | 1 |
| 7  | 0.176163 | C | 1 |
| 17 | 0.528854 | C | 1 |
| 14 | 0.689919 | C | 1 |
| 7  | 0.176163 | C | 1 |
| 4  | 0.286113 | C | 1 |
| 5  | 0.227837 | C | 1 |
| 5  | 0.372048 | C | 1 |
| 18 | 0.419911 | C | 1 |
| 7  | 0.176163 | C | 1 |
| 4  | 0.286113 | C | 1 |

|    |          |   |   |
|----|----------|---|---|
| 5  | 0.227837 | C | 1 |
| 7  | 0.688583 | C | 1 |
| 4  | 0.286113 | C | 1 |
| 17 | 0.528854 | C | 1 |
| 4  | 0.138963 | C | 1 |
| 3  | 0.122431 | C | 1 |
| 5  | 0.372048 | C | 1 |
| 18 | 0.419911 | C | 1 |
| 16 | 0.266583 | C | 1 |
| 14 | 0.689919 | C | 1 |
| 5  | 0.248274 | C | 1 |
| 7  | 0.176163 | C | 1 |
| 18 | 0.419911 | C | 1 |
| 5  | 0.227837 | C | 1 |
| 5  | 0.347157 | C | 1 |
| 18 | 0.419911 | C | 1 |
| 16 | 0.266583 | C | 1 |
| 7  | 0.688583 | C | 1 |
| 5  | 0.470239 | E | 1 |
| 4  | 0.138963 | C | 1 |
| 14 | 0.689919 | C | 1 |
| 14 | 0.689919 | C | 1 |
| 18 | 0.419911 | C | 1 |
| 17 | 0.528854 | C | 1 |
| 16 | 0.266583 | C | 1 |
| 14 | 0.689919 | C | 1 |
| 5  | 0.227837 | C | 1 |
| 5  | 0.372048 | C | 1 |
| 17 | 0.528854 | C | 1 |
| 18 | 0.419911 | C | 1 |
| 5  | 0.227837 | C | 1 |
| 7  | 0.176163 | C | 1 |
| 17 | 0.528854 | C | 1 |
| 5  | 0.372048 | C | 1 |
| 16 | 0.266583 | C | 1 |
| 5  | 0.470239 | E | 1 |
| 3  | 0.122431 | C | 1 |
| 18 | 0.419911 | C | 1 |
| 4  | 0.286113 | C | 1 |
| 17 | 0.528854 | C | 1 |
| 14 | 0.689919 | C | 1 |
| 16 | 0.266583 | C | 1 |
| 5  | 0.227837 | C | 1 |
| 18 | 0.419911 | C | 1 |
| 7  | 0.176163 | C | 1 |
| 14 | 0.689919 | C | 1 |
| 4  | 0.138963 | C | 1 |
| 5  | 0.227837 | C | 1 |
| 17 | 0.528854 | C | 1 |
| 5  | 0.248274 | C | 1 |
| 18 | 0.419911 | C | 1 |
| 4  | 0.138963 | C | 1 |
| 3  | 0.122431 | C | 1 |
| 5  | 0.470239 | E | 1 |

|    |          |   |   |
|----|----------|---|---|
| 5  | 0.227837 | C | 1 |
| 7  | 0.176163 | C | 1 |
| 5  | 0.227837 | C | 1 |
| 5  | 0.227837 | C | 1 |
| 7  | 0.176163 | C | 1 |
| 3  | 0.145178 | C | 1 |
| 16 | 0.266583 | C | 1 |
| 5  | 0.227837 | C | 1 |
| 7  | 0.688583 | C | 1 |
| 17 | 0.528854 | C | 1 |
| 4  | 0.138963 | C | 1 |
| 14 | 0.689919 | C | 1 |
| 5  | 0.347157 | C | 1 |
| 18 | 0.419911 | C | 1 |
| 3  | 0.122431 | C | 1 |
| 5  | 0.347157 | C | 1 |
| 5  | 0.248274 | C | 1 |
| 4  | 0.138963 | C | 1 |
| 17 | 0.528854 | C | 1 |
| 4  | 0.138963 | C | 1 |
| 18 | 0.419911 | C | 1 |
| 3  | 0.145178 | C | 1 |
| 5  | 0.470239 | E | 1 |
| 5  | 0.470239 | E | 1 |
| 5  | 0.470239 | E | 1 |
| 7  | 0.688583 | C | 1 |
| 4  | 0.286113 | C | 1 |
| 5  | 0.372048 | C | 1 |
| 5  | 0.385601 | C | 1 |
| 5  | 0.385601 | C | 1 |
| 13 | 0.806738 | C | 1 |
| 5  | 0.068284 | C | 1 |
| 5  | 0.207593 | C | 1 |
| 5  | 0.207593 | C | 1 |
| 5  | 0.385601 | C | 1 |
| 4  | 0.590709 | C | 1 |
| 12 | 0.567825 | C | 1 |
| 13 | 0.806738 | C | 1 |
| 5  | 0.068284 | C | 1 |
| 5  | 0.207593 | C | 1 |
| 13 | 0.806738 | C | 1 |
| 12 | 0.567825 | C | 1 |
| 5  | 0.068284 | C | 1 |
| 5  | 0.385601 | C | 1 |
| 5  | 0.476693 | G | 0 |
| 13 | 0.806738 | C | 1 |
| 5  | 0.385601 | C | 1 |
| 5  | 0.207593 | C | 1 |
| 13 | 0.806738 | C | 1 |
| 12 | 0.567825 | C | 1 |
| 19 | 0.447863 | C | 1 |
| 19 | 0.447863 | C | 1 |
| 5  | 0.385601 | C | 1 |
| 5  | 0.207593 | C | 1 |



|    |          |   |   |
|----|----------|---|---|
| 5  | 0.068284 | C | 1 |
| 5  | 0.385601 | C | 1 |
| 19 | 0.447863 | C | 1 |
| 5  | 0.385601 | C | 1 |
| 19 | 0.447863 | C | 1 |
| 5  | 0.476693 | G | 0 |
| 13 | 0.806738 | C | 1 |
| 5  | 0.207593 | C | 1 |
| 5  | 0.476693 | G | 0 |
| 5  | 0.476693 | G | 0 |
| 5  | 0.068284 | C | 1 |
| 5  | 0.068284 | C | 1 |
| 5  | 0.476693 | G | 0 |
| 5  | 0.385601 | C | 1 |
| 4  | 0.590709 | C | 1 |
| 4  | 0.590709 | C | 1 |
| 4  | 0.590709 | C | 1 |
| 5  | 0.068284 | C | 1 |
| 5  | 0.476693 | G | 0 |
| 19 | 0.447863 | C | 1 |
| 5  | 0.207593 | C | 1 |
| 5  | 0.476693 | G | 0 |
| 5  | 0.068284 | C | 1 |
| 5  | 0.207593 | C | 1 |
| 16 | 0.338999 | C | 1 |
| 16 | 0.338999 | C | 1 |
| 14 | 0.262571 | C | 1 |
| 14 | 0.262571 | C | 1 |
| 16 | 0.338999 | C | 1 |
| 14 | 0.262571 | C | 1 |
| 5  | 0.071666 | C | 1 |
| 8  | 0.410424 | C | 1 |
| 8  | 0.375347 | C | 1 |
| 22 | 0.404534 | C | 1 |
| 5  | 0.1624   | C | 1 |
| 5  | 0.1624   | C | 1 |
| 5  | 0.071666 | C | 1 |
| 4  | 0.206283 | C | 1 |
| 8  | 0.375347 | C | 1 |
| 4  | 0.206283 | C | 1 |
| 8  | 0.375347 | C | 1 |
| 8  | 0.410424 | C | 1 |
| 21 | 0.36587  | S | 0 |
| 5  | 0.071666 | C | 1 |
| 22 | 0.404534 | C | 1 |
| 22 | 0.404534 | C | 1 |
| 1  | 0.422738 | C | 1 |
| 8  | 0.410424 | C | 1 |
| 4  | 0.206283 | C | 1 |
| 5  | 0.071666 | C | 1 |
| 22 | 0.404534 | C | 1 |
| 4  | 0.206283 | C | 1 |
| 21 | 0.36587  | S | 0 |
| 4  | 0.354848 | C | 1 |

|    |          |   |   |
|----|----------|---|---|
| 4  | 0.354848 | C | 1 |
| 8  | 0.375347 | C | 1 |
| 22 | 0.404534 | C | 1 |
| 8  | 0.375347 | C | 1 |
| 21 | 0.36587  | S | 0 |
| 5  | 0.150037 | I | 0 |
| 22 | 0.404534 | C | 1 |
| 9  | 0.156541 | I | 0 |
| 5  | 0.150037 | I | 0 |
| 22 | 0.404534 | C | 1 |
| 4  | 0.354848 | C | 1 |
| 1  | 0.422738 | C | 1 |
| 21 | 0.36587  | S | 0 |
| 11 | 0.466703 | C | 1 |
| 22 | 0.404534 | C | 1 |
| 5  | 0.1624   | C | 1 |
| 9  | 0.156541 | I | 0 |
| 21 | 0.36587  | S | 0 |
| 9  | 0.156541 | I | 0 |
| 5  | 0.1624   | C | 1 |
| 5  | 0.150037 | I | 0 |
| 1  | 0.422738 | C | 1 |
| 8  | 0.375347 | C | 1 |
| 4  | 0.354848 | C | 1 |
| 21 | 0.36587  | S | 0 |
| 9  | 0.156541 | I | 0 |
| 4  | 0.206283 | C | 1 |
| 8  | 0.410424 | C | 1 |
| 1  | 0.422738 | C | 1 |
| 4  | 0.354848 | C | 1 |
| 5  | 0.1624   | C | 1 |
| 8  | 0.410424 | C | 1 |
| 1  | 0.422738 | C | 1 |
| 5  | 0.150037 | I | 0 |
| 1  | 0.422738 | C | 1 |
| 22 | 0.404534 | C | 1 |
| 8  | 0.410424 | C | 1 |
| 8  | 0.410424 | C | 1 |
| 22 | 0.404534 | C | 1 |
| 11 | 0.466703 | C | 1 |
| 1  | 0.422738 | C | 1 |
| 5  | 0.071666 | C | 1 |
| 11 | 0.466703 | C | 1 |
| 22 | 0.404534 | C | 1 |
| 11 | 0.466703 | C | 1 |
| 22 | 0.404534 | C | 1 |
| 5  | 0.071666 | C | 1 |
| 1  | 0.422738 | C | 1 |
| 4  | 0.206283 | C | 1 |
| 22 | 0.404534 | C | 1 |
| 4  | 0.354848 | C | 1 |
| 22 | 0.404534 | C | 1 |
| 4  | 0.206283 | C | 1 |
| 1  | 0.422738 | C | 1 |

|    |          |   |   |
|----|----------|---|---|
| 22 | 0.404534 | C | 1 |
| 9  | 0.156541 | I | 0 |
| 4  | 0.354848 | C | 1 |
| 5  | 0.150037 | I | 0 |
| 5  | 0.1624   | C | 1 |
| 21 | 0.36587  | S | 0 |
| 4  | 0.354848 | C | 1 |
| 5  | 0.071666 | C | 1 |
| 9  | 0.156541 | I | 0 |
| 5  | 0.071666 | C | 1 |
| 8  | 0.375347 | C | 1 |
| 1  | 0.422738 | C | 1 |
| 5  | 0.150037 | I | 0 |
| 8  | 0.375347 | C | 1 |
| 5  | 0.071666 | C | 1 |
| 4  | 0.206283 | C | 1 |
| 5  | 0.150037 | I | 0 |
| 5  | 0.235169 | I | 0 |
| 21 | 0.331881 | S | 0 |
| 6  | 0.472676 | E | 1 |
| 21 | 0.331881 | S | 0 |
| 21 | 0.331881 | S | 0 |
| 5  | 0.235169 | I | 0 |
| 21 | 0.331881 | S | 0 |
| 6  | 0.472676 | E | 1 |
| 5  | 0.414277 | C | 1 |
| 18 | 0.432806 | C | 1 |
| 21 | 0.331881 | S | 0 |
| 5  | 0.414277 | C | 1 |
| 5  | 0.414277 | C | 1 |
| 5  | 0.235169 | I | 0 |
| 21 | 0.331881 | S | 0 |
| 18 | 0.432806 | C | 1 |
| 6  | 0.472676 | E | 1 |
| 6  | 0.472676 | E | 1 |
| 5  | 0.414277 | C | 1 |
| 5  | 0.414277 | C | 1 |
| 5  | 0.414277 | C | 1 |
| 5  | 0.414277 | C | 1 |
| 21 | 0.331881 | S | 0 |
| 5  | 0.414277 | C | 1 |
| 21 | 0.331881 | S | 0 |
| 18 | 0.432806 | C | 1 |
| 21 | 0.331881 | S | 0 |
| 5  | 0.235169 | I | 0 |
| 21 | 0.331881 | S | 0 |
| 5  | 0.235169 | I | 0 |
| 21 | 0.331881 | S | 0 |
| 5  | 0.235169 | I | 0 |
| 18 | 0.432806 | C | 1 |
| 5  | 0.235169 | I | 0 |
| 5  | 0.414277 | C | 1 |
| 18 | 0.432806 | C | 1 |
| 6  | 0.472676 | E | 1 |

|    |          |   |   |
|----|----------|---|---|
| 5  | 0.235169 | I | 0 |
| 18 | 0.432806 | C | 1 |
| 6  | 0.472676 | E | 1 |
| 5  | 0.414277 | C | 1 |
| 5  | 0.414277 | C | 1 |
| 21 | 0.331881 | S | 0 |
| 21 | 0.331881 | S | 0 |
| 18 | 0.691936 | C | 1 |
| 18 | 0.691936 | C | 1 |
| 18 | 0.691936 | C | 1 |
| 15 | 0.54062  | C | 1 |
| 15 | 0.54062  | C | 1 |
| 17 | 0.736858 | C | 1 |
| 15 | 0.54062  | C | 1 |
| 17 | 0.736858 | C | 1 |
| 15 | 0.54062  | C | 1 |
| 17 | 0.736858 | C | 1 |
| 17 | 0.736858 | C | 1 |
| 17 | 0.736858 | C | 1 |
| 15 | 0.54062  | C | 1 |
| 17 | 0.736858 | C | 1 |
| 15 | 0.54062  | C | 1 |
| 17 | 0.736858 | C | 1 |
| 15 | 0.54062  | C | 1 |
| 21 | 0.670585 | C | 1 |
| 5  | 0.137745 | C | 1 |
| 1  | 0.184682 | C | 1 |
| 21 | 0.670585 | C | 1 |
| 18 | 0.745003 | C | 1 |
| 4  | 0.15412  | C | 1 |
| 1  | 0.184682 | C | 1 |
| 21 | 0.670585 | C | 1 |
| 19 | 0.49437  | C | 1 |
| 4  | 0.15412  | C | 1 |
| 18 | 0.745003 | C | 1 |
| 18 | 0.745003 | C | 1 |
| 21 | 0.567267 | C | 1 |
| 1  | 0.184682 | C | 1 |
| 3  | 0.156932 | C | 1 |
| 1  | 0.184682 | C | 1 |
| 5  | 0.137745 | C | 1 |
| 3  | 0.156932 | C | 1 |
| 18 | 0.745003 | C | 1 |
| 5  | 0.137745 | C | 1 |
| 15 | 0.503495 | C | 1 |
| 5  | 0.137745 | C | 1 |
| 21 | 0.567267 | C | 1 |
| 19 | 0.49437  | C | 1 |
| 3  | 0.156932 | C | 1 |
| 1  | 0.184682 | C | 1 |
| 19 | 0.49437  | C | 1 |
| 15 | 0.503495 | C | 1 |
| 3  | 0.156932 | C | 1 |
| 19 | 0.49437  | C | 1 |

|    |          |   |   |
|----|----------|---|---|
| 18 | 0.745003 | C | 1 |
| 5  | 0.137745 | C | 1 |
| 4  | 0.15412  | C | 1 |
| 21 | 0.670585 | C | 1 |
| 21 | 0.567267 | C | 1 |
| 6  | 0.245289 | C | 1 |
| 19 | 0.49437  | C | 1 |
| 1  | 0.184682 | C | 1 |
| 15 | 0.503495 | C | 1 |
| 21 | 0.670585 | C | 1 |
| 21 | 0.567267 | C | 1 |
| 6  | 0.245289 | C | 1 |
| 18 | 0.745003 | C | 1 |
| 21 | 0.567267 | C | 1 |
| 15 | 0.503495 | C | 1 |
| 1  | 0.184682 | C | 1 |
| 21 | 0.670585 | C | 1 |
| 4  | 0.15412  | C | 1 |
| 3  | 0.156932 | C | 1 |
| 18 | 0.745003 | C | 1 |
| 21 | 0.670585 | C | 1 |
| 6  | 0.245289 | C | 1 |
| 1  | 0.184682 | C | 1 |
| 21 | 0.567267 | C | 1 |
| 1  | 0.184682 | C | 1 |
| 4  | 0.15412  | C | 1 |
| 21 | 0.567267 | C | 1 |
| 5  | 0.137745 | C | 1 |
| 18 | 0.745003 | C | 1 |
| 18 | 0.745003 | C | 1 |
| 19 | 0.49437  | C | 1 |
| 21 | 0.567267 | C | 1 |
| 19 | 0.49437  | C | 1 |
| 21 | 0.670585 | C | 1 |
| 21 | 0.670585 | C | 1 |
| 21 | 0.670585 | C | 1 |
| 3  | 0.156932 | C | 1 |
| 21 | 0.670585 | C | 1 |
| 21 | 0.670585 | C | 1 |
| 5  | 0.137745 | C | 1 |
| 21 | 0.567267 | C | 1 |
| 15 | 0.503495 | C | 1 |
| 5  | 0.137745 | C | 1 |
| 1  | 0.184682 | C | 1 |
| 5  | 0.137745 | C | 1 |
| 18 | 0.745003 | C | 1 |
| 19 | 0.49437  | C | 1 |
| 21 | 0.670585 | C | 1 |
| 6  | 0.245289 | C | 1 |
| 19 | 0.49437  | C | 1 |
| 4  | 0.15412  | C | 1 |
| 21 | 0.567267 | C | 1 |
| 21 | 0.567267 | C | 1 |
| 6  | 0.245289 | C | 1 |

|    |          |   |   |
|----|----------|---|---|
| 18 | 0.745003 | C | 1 |
| 21 | 0.670585 | C | 1 |
| 21 | 0.567267 | C | 1 |
| 19 | 0.49437  | C | 1 |
| 4  | 0.15412  | C | 1 |
| 21 | 0.670585 | C | 1 |
| 21 | 0.670585 | C | 1 |
| 21 | 0.567267 | C | 1 |
| 3  | 0.22365  | C | 1 |
| 18 | 0.561085 | K | 1 |
| 5  | 0.433609 | C | 1 |
| 18 | 0.623156 | C | 1 |
| 5  | 0.433609 | C | 1 |
| 4  | 0.3384   | C | 1 |
| 22 | 0.189144 | C | 1 |
| 7  | 0.48782  | C | 1 |
| 5  | 0.181649 | C | 1 |
| 5  | 0.433609 | C | 1 |
| 4  | 0.3384   | C | 1 |
| 22 | 0.338821 | C | 1 |
| 18 | 0.623156 | C | 1 |
| 5  | 0.275122 | I | 0 |
| 22 | 0.189144 | C | 1 |
| 22 | 0.338821 | C | 1 |
| 22 | 0.338821 | C | 1 |
| 22 | 0.189144 | C | 1 |
| 3  | 0.22365  | C | 1 |
| 22 | 0.189144 | C | 1 |
| 5  | 0.368538 | C | 1 |
| 5  | 0.578102 | C | 1 |
| 22 | 0.338821 | C | 1 |
| 22 | 0.663016 | C | 1 |
| 5  | 0.578102 | C | 1 |
| 7  | 0.095476 | C | 1 |
| 5  | 0.368538 | C | 1 |
| 22 | 0.338821 | C | 1 |
| 15 | 0.517954 | I | 0 |
| 22 | 0.338821 | C | 1 |
| 15 | 0.517954 | I | 0 |
| 7  | 0.48782  | C | 1 |
| 16 | 0.620035 | F | 0 |
| 15 | 0.517954 | I | 0 |
| 7  | 0.095476 | C | 1 |
| 22 | 0.663016 | C | 1 |
| 3  | 0.177656 | I | 0 |
| 3  | 0.22365  | C | 1 |
| 5  | 0.181649 | C | 1 |
| 7  | 0.095476 | C | 1 |
| 3  | 0.22365  | C | 1 |
| 5  | 0.368538 | C | 1 |
| 3  | 0.177656 | I | 0 |
| 5  | 0.433609 | C | 1 |
| 19 | 0.098014 | A | 0 |
| 5  | 0.368538 | C | 1 |

|    |          |   |   |
|----|----------|---|---|
| 5  | 0.433609 | C | 1 |
| 3  | 0.177656 | I | 0 |
| 7  | 0.095476 | C | 1 |
| 22 | 0.189144 | C | 1 |
| 18 | 0.623156 | C | 1 |
| 22 | 0.338821 | C | 1 |
| 22 | 0.663016 | C | 1 |
| 22 | 0.663016 | C | 1 |
| 5  | 0.181649 | C | 1 |
| 22 | 0.663016 | C | 1 |
| 5  | 0.181649 | C | 1 |
| 5  | 0.433609 | C | 1 |
| 9  | 0.526065 | I | 0 |
| 3  | 0.22365  | C | 1 |
| 5  | 0.275122 | I | 0 |
| 7  | 0.48782  | C | 1 |
| 5  | 0.578102 | C | 1 |
| 5  | 0.368538 | C | 1 |
| 7  | 0.48782  | C | 1 |
| 7  | 0.095476 | C | 1 |
| 9  | 0.526065 | I | 0 |
| 18 | 0.623156 | C | 1 |
| 16 | 0.620035 | F | 0 |
| 7  | 0.095476 | C | 1 |
| 22 | 0.338821 | C | 1 |
| 9  | 0.526065 | I | 0 |
| 22 | 0.663016 | C | 1 |
| 22 | 0.338821 | C | 1 |
| 15 | 0.517954 | I | 0 |
| 5  | 0.275122 | I | 0 |
| 5  | 0.368538 | C | 1 |
| 5  | 0.368538 | C | 1 |
| 5  | 0.368538 | C | 1 |
| 7  | 0.48782  | C | 1 |
| 22 | 0.338821 | C | 1 |
| 9  | 0.526065 | I | 0 |
| 5  | 0.275122 | I | 0 |
| 19 | 0.098014 | A | 0 |
| 7  | 0.48782  | C | 1 |
| 5  | 0.368538 | C | 1 |
| 4  | 0.3384   | C | 1 |
| 5  | 0.181649 | C | 1 |
| 5  | 0.433609 | C | 1 |
| 19 | 0.098014 | A | 0 |
| 5  | 0.578102 | C | 1 |
| 5  | 0.578102 | C | 1 |
| 16 | 0.620035 | F | 0 |
| 5  | 0.578102 | C | 1 |
| 16 | 0.620035 | F | 0 |
| 7  | 0.095476 | C | 1 |
| 22 | 0.338821 | C | 1 |
| 16 | 0.620035 | F | 0 |
| 5  | 0.368538 | C | 1 |
| 18 | 0.561085 | K | 1 |

|    |          |   |   |
|----|----------|---|---|
| 15 | 0.517954 | I | 0 |
| 9  | 0.526065 | I | 0 |
| 9  | 0.526065 | I | 0 |
| 4  | 0.3384   | C | 1 |
| 5  | 0.433609 | C | 1 |
| 22 | 0.338821 | C | 1 |
| 5  | 0.181649 | C | 1 |
| 22 | 0.189144 | C | 1 |
| 5  | 0.433609 | C | 1 |
| 22 | 0.338821 | C | 1 |
| 15 | 0.517954 | I | 0 |
| 3  | 0.177656 | I | 0 |
| 22 | 0.663016 | C | 1 |
| 5  | 0.578102 | C | 1 |
| 5  | 0.275122 | I | 0 |
| 18 | 0.561085 | K | 1 |
| 5  | 0.433609 | C | 1 |
| 18 | 0.561085 | K | 1 |
| 3  | 0.177656 | I | 0 |
| 22 | 0.338821 | C | 1 |
| 5  | 0.275122 | I | 0 |
| 15 | 0.517954 | I | 0 |
| 4  | 0.3384   | C | 1 |
| 22 | 0.338821 | C | 1 |
| 16 | 0.620035 | F | 0 |
| 22 | 0.189144 | C | 1 |
| 7  | 0.48782  | C | 1 |
| 15 | 0.517954 | I | 0 |
| 22 | 0.338821 | C | 1 |
| 3  | 0.22365  | C | 1 |
| 22 | 0.189144 | C | 1 |
| 22 | 0.338821 | C | 1 |
| 18 | 0.623156 | C | 1 |
| 16 | 0.620035 | F | 0 |
| 5  | 0.181649 | C | 1 |
| 5  | 0.275122 | I | 0 |
| 5  | 0.578102 | C | 1 |
| 5  | 0.275122 | I | 0 |
| 15 | 0.517954 | I | 0 |
| 16 | 0.620035 | F | 0 |
| 5  | 0.578102 | C | 1 |
| 22 | 0.338821 | C | 1 |
| 16 | 0.620035 | F | 0 |
| 18 | 0.561085 | K | 1 |
| 22 | 0.338821 | C | 1 |
| 5  | 0.368538 | C | 1 |
| 3  | 0.22365  | C | 1 |
| 5  | 0.368538 | C | 1 |
| 22 | 0.663016 | C | 1 |
| 5  | 0.368538 | C | 1 |
| 15 | 0.517954 | I | 0 |
| 16 | 0.620035 | F | 0 |
| 22 | 0.663016 | C | 1 |
| 5  | 0.10217  | C | 1 |



|    |          |   |   |
|----|----------|---|---|
| 5  | 0.10217  | C | 1 |
| 5  | 0.10217  | C | 1 |
| 5  | 0.10217  | C | 1 |
| 5  | 0.10217  | C | 1 |
| 5  | 0.10217  | C | 1 |
| 17 | 0.762628 | C | 1 |
| 4  | 0.303444 | C | 1 |
| 17 | 0.517891 | C | 1 |
| 21 | 0.679914 | C | 1 |
| 21 | 0.679914 | C | 1 |
| 21 | 0.679914 | C | 1 |
| 7  | 0.393174 | C | 1 |
| 17 | 0.762628 | C | 1 |
| 21 | 0.679914 | C | 1 |
| 21 | 0.679914 | C | 1 |
| 7  | 0.393174 | C | 1 |
| 17 | 0.314649 | C | 1 |
| 21 | 0.679914 | C | 1 |
| 17 | 0.314649 | C | 1 |
| 17 | 0.517891 | C | 1 |
| 21 | 0.679914 | C | 1 |
| 7  | 0.393174 | C | 1 |
| 17 | 0.314649 | C | 1 |
| 4  | 0.303444 | C | 1 |
| 17 | 0.762628 | C | 1 |
| 4  | 0.303444 | C | 1 |
| 21 | 0.679914 | C | 1 |
| 17 | 0.314649 | C | 1 |
| 17 | 0.517891 | C | 1 |
| 17 | 0.762628 | C | 1 |
| 4  | 0.303444 | C | 1 |
| 4  | 0.303444 | C | 1 |
| 4  | 0.303444 | C | 1 |
| 21 | 0.679914 | C | 1 |
| 21 | 0.679914 | C | 1 |
| 7  | 0.393174 | C | 1 |
| 4  | 0.303444 | C | 1 |
| 21 | 0.679914 | C | 1 |
| 17 | 0.517891 | C | 1 |
| 17 | 0.314649 | C | 1 |
| 17 | 0.517891 | C | 1 |
| 21 | 0.679914 | C | 1 |
| 4  | 0.303444 | C | 1 |
| 17 | 0.517891 | C | 1 |
| 21 | 0.679914 | C | 1 |
| 21 | 0.679914 | C | 1 |
| 21 | 0.679914 | C | 1 |
| 4  | 0.303444 | C | 1 |
| 21 | 0.679914 | C | 1 |
| 17 | 0.314649 | C | 1 |
| 17 | 0.314649 | C | 1 |
| 17 | 0.314649 | C | 1 |
| 17 | 0.314649 | C | 1 |
| 17 | 0.314649 | C | 1 |

|    |          |   |   |
|----|----------|---|---|
| 21 | 0.679914 | C | 1 |
| 17 | 0.517891 | C | 1 |
| 21 | 0.679914 | C | 1 |
| 17 | 0.314649 | C | 1 |
| 17 | 0.517891 | C | 1 |
| 17 | 0.517891 | C | 1 |
| 21 | 0.679914 | C | 1 |
| 21 | 0.679914 | C | 1 |
| 17 | 0.762628 | C | 1 |
| 21 | 0.679914 | C | 1 |
| 21 | 0.679914 | C | 1 |
| 21 | 0.679914 | C | 1 |
| 21 | 0.679914 | C | 1 |
| 21 | 0.679914 | C | 1 |
| 17 | 0.762628 | C | 1 |
| 17 | 0.517891 | C | 1 |
| 21 | 0.679914 | C | 1 |
| 7  | 0.393174 | C | 1 |
| 17 | 0.314649 | C | 1 |
| 17 | 0.517891 | C | 1 |
| 21 | 0.679914 | C | 1 |
| 17 | 0.643975 | C | 1 |
| 17 | 0.643975 | C | 1 |
| 17 | 0.643975 | C | 1 |
| 5  | 0.597947 | C | 1 |
| 19 | 0.177256 | C | 1 |
| 15 | 0.696445 | C | 1 |
| 19 | 0.177256 | C | 1 |
| 19 | 0.177256 | C | 1 |
| 17 | 0.643975 | C | 1 |
| 19 | 0.177256 | C | 1 |
| 19 | 0.177256 | C | 1 |
| 5  | 0.597947 | C | 1 |
| 17 | 0.643975 | C | 1 |
| 17 | 0.643975 | C | 1 |
| 15 | 0.696445 | C | 1 |
| 15 | 0.696445 | C | 1 |
| 17 | 0.643975 | C | 1 |
| 15 | 0.696445 | C | 1 |
| 17 | 0.643975 | C | 1 |
| 17 | 0.643975 | C | 1 |
| 17 | 0.643975 | C | 1 |
| 17 | 0.643975 | C | 1 |
| 15 | 0.696445 | C | 1 |
| 19 | 0.177256 | C | 1 |
| 15 | 0.696445 | C | 1 |
| 17 | 0.643975 | C | 1 |
| 17 | 0.643975 | C | 1 |
| 5  | 0.597947 | C | 1 |
| 17 | 0.643975 | C | 1 |
| 17 | 0.643975 | C | 1 |
| 19 | 0.177256 | C | 1 |
| 17 | 0.643975 | C | 1 |
| 17 | 0.643975 | C | 1 |
| 19 | 0.177256 | C | 1 |

|    |          |   |   |
|----|----------|---|---|
| 19 | 0.177256 | C | 1 |
| 19 | 0.177256 | C | 1 |
| 19 | 0.177256 | C | 1 |
| 5  | 0.597947 | C | 1 |
| 5  | 0.597947 | C | 1 |
| 17 | 0.643975 | C | 1 |
| 17 | 0.643975 | C | 1 |
| 17 | 0.643975 | C | 1 |
| 1  | 0.381927 | C | 1 |
| 5  | 0.362873 | L | 0 |
| 21 | 0.431609 | C | 1 |
| 5  | 0.362873 | L | 0 |
| 1  | 0.381927 | C | 1 |
| 4  | 0.70563  | C | 1 |
| 21 | 0.431609 | C | 1 |
| 5  | 0.362873 | L | 0 |
| 1  | 0.381927 | C | 1 |
| 19 | 0.273827 | C | 1 |
| 19 | 0.273827 | C | 1 |
| 19 | 0.273827 | C | 1 |
| 19 | 0.273827 | C | 1 |
| 5  | 0.362873 | L | 0 |
| 21 | 0.431609 | C | 1 |
| 5  | 0.362873 | L | 0 |
| 19 | 0.273827 | C | 1 |
| 19 | 0.273827 | C | 1 |
| 9  | 0.472599 | C | 1 |
| 5  | 0.362873 | L | 0 |
| 19 | 0.273827 | C | 1 |
| 4  | 0.70563  | C | 1 |
| 9  | 0.472599 | C | 1 |
| 9  | 0.472599 | C | 1 |
| 9  | 0.472599 | C | 1 |
| 19 | 0.273827 | C | 1 |
| 19 | 0.273827 | C | 1 |
| 19 | 0.273827 | C | 1 |
| 4  | 0.70563  | C | 1 |
| 4  | 0.70563  | C | 1 |
| 5  | 0.362873 | L | 0 |
| 4  | 0.70563  | C | 1 |
| 9  | 0.472599 | C | 1 |
| 5  | 0.362873 | L | 0 |
| 7  | 0.336598 | C | 1 |
| 14 | 0.236368 | C | 1 |
| 4  | 0.679679 | C | 1 |
| 4  | 0.679679 | C | 1 |
| 7  | 0.336598 | C | 1 |
| 14 | 0.236368 | C | 1 |
| 7  | 0.336598 | C | 1 |
| 14 | 0.236368 | C | 1 |
| 4  | 0.679679 | C | 1 |
| 4  | 0.679679 | C | 1 |
| 14 | 0.236368 | C | 1 |
| 7  | 0.336598 | C | 1 |

|    |          |   |   |
|----|----------|---|---|
| 4  | 0.679679 | C | 1 |
| 7  | 0.336598 | C | 1 |
| 7  | 0.336598 | C | 1 |
| 4  | 0.679679 | C | 1 |
| 14 | 0.236368 | C | 1 |
| 14 | 0.236368 | C | 1 |
| 14 | 0.236368 | C | 1 |
| 4  | 0.679679 | C | 1 |
| 4  | 0.679679 | C | 1 |
| 7  | 0.336598 | C | 1 |
| 15 | 0.279639 | C | 1 |
| 15 | 0.279639 | C | 1 |
| 15 | 0.279639 | C | 1 |
| 15 | 0.279639 | C | 1 |
| 15 | 0.279639 | C | 1 |
| 15 | 0.279639 | C | 1 |
| 15 | 0.486291 | C | 1 |
| 6  | 0.38898  | I | 0 |
| 8  | 0.397262 | C | 1 |
| 8  | 0.397262 | C | 1 |
| 8  | 0.397262 | C | 1 |
| 5  | 0.259656 | C | 1 |
| 19 | 0.321319 | C | 1 |
| 5  | 0.259656 | C | 1 |
| 19 | 0.321319 | C | 1 |
| 8  | 0.397262 | C | 1 |
| 5  | 0.259656 | C | 1 |
| 15 | 0.486291 | C | 1 |
| 15 | 0.486291 | C | 1 |
| 5  | 0.265851 | C | 1 |
| 19 | 0.321319 | C | 1 |
| 5  | 0.259656 | C | 1 |
| 6  | 0.38898  | I | 0 |
| 15 | 0.486291 | C | 1 |
| 5  | 0.265851 | C | 1 |
| 4  | 0.197345 | I | 0 |
| 6  | 0.38898  | I | 0 |
| 5  | 0.265851 | C | 1 |
| 8  | 0.397262 | C | 1 |
| 8  | 0.397262 | C | 1 |
| 5  | 0.259656 | C | 1 |
| 6  | 0.38898  | I | 0 |
| 5  | 0.259656 | C | 1 |
| 19 | 0.321319 | C | 1 |
| 8  | 0.397262 | C | 1 |
| 15 | 0.486291 | C | 1 |
| 5  | 0.265851 | C | 1 |
| 19 | 0.321319 | C | 1 |
| 6  | 0.38898  | I | 0 |
| 6  | 0.38898  | I | 0 |
| 5  | 0.265851 | C | 1 |
| 15 | 0.329338 | C | 1 |
| 19 | 0.321319 | C | 1 |
| 15 | 0.486291 | C | 1 |

|    |          |   |   |
|----|----------|---|---|
| 15 | 0.329338 | C | 1 |
| 5  | 0.265851 | C | 1 |
| 8  | 0.397262 | C | 1 |
| 15 | 0.329338 | C | 1 |
| 5  | 0.265851 | C | 1 |
| 19 | 0.321319 | C | 1 |
| 15 | 0.329338 | C | 1 |
| 6  | 0.38898  | I | 0 |
| 5  | 0.259656 | C | 1 |
| 6  | 0.38898  | I | 0 |
| 8  | 0.397262 | C | 1 |
| 6  | 0.38898  | I | 0 |
| 4  | 0.197345 | I | 0 |
| 6  | 0.38898  | I | 0 |
| 6  | 0.38898  | I | 0 |
| 15 | 0.486291 | C | 1 |
| 4  | 0.197345 | I | 0 |
| 8  | 0.397262 | C | 1 |
| 6  | 0.38898  | I | 0 |
| 15 | 0.329338 | C | 1 |
| 5  | 0.606763 | C | 1 |
| 8  | 0.678906 | C | 1 |
| 9  | 0.647395 | E | 1 |
| 5  | 0.527403 | C | 1 |
| 16 | 0.598815 | S | 0 |
| 1  | 0.155342 | C | 1 |
| 3  | 0.150612 | C | 1 |
| 18 | 0.329449 | C | 1 |
| 7  | 0.358462 | C | 1 |
| 3  | 0.602222 | C | 1 |
| 3  | 0.602222 | C | 1 |
| 8  | 0.499312 | C | 1 |
| 5  | 0.502664 | C | 1 |
| 5  | 0.415285 | C | 1 |
| 7  | 0.230669 | G | 0 |
| 5  | 0.277708 | C | 1 |
| 4  | 0.463842 | C | 1 |
| 4  | 0.287897 | C | 1 |
| 4  | 0.162471 | C | 1 |
| 9  | 0.132333 | C | 1 |
| 8  | 0.294559 | C | 1 |
| 6  | 0.373743 | C | 1 |
| 6  | 0.373743 | C | 1 |
| 5  | 0.49833  | C | 1 |
| 4  | 0.519865 | C | 1 |
| 5  | 0.095869 | C | 1 |
| 5  | 0.452165 | C | 1 |
| 1  | 0.155342 | C | 1 |
| 8  | 0.678906 | C | 1 |
| 5  | 0.415285 | C | 1 |
| 1  | 0.371599 | C | 1 |
| 6  | 0.304001 | G | 0 |
| 12 | 0.068284 | C | 1 |
| 18 | 0.382072 | C | 1 |

|    |          |   |   |
|----|----------|---|---|
| 9  | 0.499791 | F | 0 |
| 4  | 0.642423 | M | 0 |
| 6  | 0.734534 | C | 1 |
| 16 | 0.598815 | S | 0 |
| 6  | 0.734534 | C | 1 |
| 9  | 0.499791 | F | 0 |
| 5  | 0.527403 | C | 1 |
| 9  | 0.589945 | C | 1 |
| 4  | 0.463842 | C | 1 |
| 1  | 0.447383 | C | 1 |
| 1  | 0.559798 | M | 0 |
| 18 | 0.382072 | C | 1 |
| 9  | 0.647395 | E | 1 |
| 21 | 0.482095 | S | 0 |
| 6  | 0.734534 | C | 1 |
| 4  | 0.521142 | C | 1 |
| 4  | 0.463842 | C | 1 |
| 5  | 0.480619 | C | 1 |
| 21 | 0.482095 | S | 0 |
| 21 | 0.482095 | S | 0 |
| 3  | 0.602222 | C | 1 |
| 18 | 0.329449 | C | 1 |
| 4  | 0.472703 | C | 1 |
| 9  | 0.589945 | C | 1 |
| 1  | 0.371599 | C | 1 |
| 1  | 0.155342 | C | 1 |
| 12 | 0.657225 | C | 1 |
| 12 | 0.657225 | C | 1 |
| 12 | 0.657225 | C | 1 |
| 12 | 0.657225 | C | 1 |
| 12 | 0.657225 | C | 1 |
| 4  | 0.463842 | C | 1 |
| 12 | 0.657225 | C | 1 |
| 3  | 0.620309 | C | 1 |
| 4  | 0.519865 | C | 1 |
| 5  | 0.606763 | C | 1 |
| 21 | 0.482095 | S | 0 |
| 7  | 0.230669 | G | 0 |
| 21 | 0.482095 | S | 0 |
| 12 | 0.657225 | C | 1 |
| 7  | 0.230669 | G | 0 |
| 5  | 0.40617  | C | 1 |
| 1  | 0.200022 | C | 1 |
| 12 | 0.657225 | C | 1 |
| 5  | 0.480619 | C | 1 |
| 1  | 0.200022 | C | 1 |
| 12 | 0.657225 | C | 1 |
| 7  | 0.358462 | C | 1 |
| 12 | 0.657225 | C | 1 |
| 7  | 0.358462 | C | 1 |
| 18 | 0.329449 | C | 1 |
| 1  | 0.447383 | C | 1 |
| 7  | 0.230669 | G | 0 |
| 3  | 0.217259 | I | 0 |

|    |          |   |   |
|----|----------|---|---|
| 3  | 0.602222 | C | 1 |
| 5  | 0.307491 | C | 1 |
| 4  | 0.472703 | C | 1 |
| 3  | 0.150612 | C | 1 |
| 4  | 0.472703 | C | 1 |
| 8  | 0.499312 | C | 1 |
| 9  | 0.132333 | C | 1 |
| 9  | 0.499791 | F | 0 |
| 21 | 0.482095 | S | 0 |
| 8  | 0.499312 | C | 1 |
| 5  | 0.415285 | C | 1 |
| 5  | 0.095869 | C | 1 |
| 5  | 0.452165 | C | 1 |
| 7  | 0.230669 | G | 0 |
| 6  | 0.304001 | G | 0 |
| 5  | 0.415285 | C | 1 |
| 6  | 0.373743 | C | 1 |
| 18 | 0.382072 | C | 1 |
| 18 | 0.329449 | C | 1 |
| 18 | 0.329449 | C | 1 |
| 3  | 0.068284 | C | 1 |
| 1  | 0.447383 | C | 1 |
| 5  | 0.415285 | C | 1 |
| 1  | 0.371599 | C | 1 |
| 9  | 0.647395 | E | 1 |
| 5  | 0.606763 | C | 1 |
| 6  | 0.734534 | C | 1 |
| 4  | 0.519865 | C | 1 |
| 9  | 0.381069 | C | 1 |
| 5  | 0.527403 | C | 1 |
| 6  | 0.373743 | C | 1 |
| 5  | 0.49833  | C | 1 |
| 6  | 0.734534 | C | 1 |
| 8  | 0.499312 | C | 1 |
| 5  | 0.49833  | C | 1 |
| 5  | 0.480619 | C | 1 |
| 4  | 0.287897 | C | 1 |
| 21 | 0.482095 | S | 0 |
| 1  | 0.200022 | C | 1 |
| 5  | 0.49833  | C | 1 |
| 16 | 0.598815 | S | 0 |
| 12 | 0.657225 | C | 1 |
| 3  | 0.217259 | I | 0 |
| 9  | 0.647395 | E | 1 |
| 9  | 0.499791 | F | 0 |
| 4  | 0.114211 | C | 1 |
| 5  | 0.277708 | C | 1 |
| 7  | 0.230669 | G | 0 |
| 5  | 0.407236 | C | 1 |
| 3  | 0.068284 | C | 1 |
| 8  | 0.294559 | C | 1 |
| 12 | 0.657225 | C | 1 |
| 5  | 0.407236 | C | 1 |
| 1  | 0.447383 | C | 1 |

|    |          |   |   |
|----|----------|---|---|
| 3  | 0.620309 | C | 1 |
| 4  | 0.519865 | C | 1 |
| 5  | 0.606763 | C | 1 |
| 4  | 0.243597 | C | 1 |
| 4  | 0.463842 | C | 1 |
| 5  | 0.307491 | C | 1 |
| 5  | 0.307491 | C | 1 |
| 4  | 0.114211 | C | 1 |
| 6  | 0.304001 | G | 0 |
| 4  | 0.287897 | C | 1 |
| 5  | 0.527403 | C | 1 |
| 12 | 0.657225 | C | 1 |
| 18 | 0.329449 | C | 1 |
| 4  | 0.350985 | C | 1 |
| 5  | 0.527403 | C | 1 |
| 5  | 0.527403 | C | 1 |
| 4  | 0.243597 | C | 1 |
| 3  | 0.217259 | I | 0 |
| 4  | 0.642423 | M | 0 |
| 1  | 0.559798 | M | 0 |
| 6  | 0.373743 | C | 1 |
| 6  | 0.734534 | C | 1 |
| 4  | 0.642423 | M | 0 |
| 21 | 0.482095 | S | 0 |
| 6  | 0.734534 | C | 1 |
| 7  | 0.230669 | G | 0 |
| 9  | 0.132333 | C | 1 |
| 9  | 0.647395 | E | 1 |
| 5  | 0.272648 | D | 1 |
| 5  | 0.49833  | C | 1 |
| 6  | 0.304001 | G | 0 |
| 4  | 0.126559 | C | 1 |
| 3  | 0.217259 | I | 0 |
| 5  | 0.272648 | D | 1 |
| 12 | 0.657225 | C | 1 |
| 5  | 0.480619 | C | 1 |
| 5  | 0.480619 | C | 1 |
| 7  | 0.358462 | C | 1 |
| 8  | 0.294559 | C | 1 |
| 9  | 0.381069 | C | 1 |
| 3  | 0.284378 | C | 1 |
| 5  | 0.606763 | C | 1 |
| 5  | 0.415285 | C | 1 |
| 1  | 0.155342 | C | 1 |
| 5  | 0.272648 | D | 1 |
| 5  | 0.452165 | C | 1 |
| 8  | 0.499312 | C | 1 |
| 4  | 0.243597 | C | 1 |
| 5  | 0.277708 | C | 1 |
| 4  | 0.642423 | M | 0 |
| 5  | 0.452165 | C | 1 |
| 4  | 0.472703 | C | 1 |
| 9  | 0.647395 | E | 1 |
| 5  | 0.277708 | C | 1 |



|    |          |   |   |
|----|----------|---|---|
| 5  | 0.527403 | C | 1 |
| 5  | 0.502664 | C | 1 |
| 5  | 0.502664 | C | 1 |
| 4  | 0.350985 | C | 1 |
| 18 | 0.382072 | C | 1 |
| 5  | 0.480619 | C | 1 |
| 5  | 0.38065  | C | 1 |
| 5  | 0.480619 | C | 1 |
| 8  | 0.294559 | C | 1 |
| 1  | 0.175459 | C | 1 |
| 5  | 0.527403 | C | 1 |
| 4  | 0.463842 | C | 1 |
| 8  | 0.294559 | C | 1 |
| 6  | 0.304001 | G | 0 |
| 4  | 0.463842 | C | 1 |
| 4  | 0.463842 | C | 1 |
| 5  | 0.49833  | C | 1 |
| 1  | 0.559798 | M | 0 |
| 4  | 0.463842 | C | 1 |
| 18 | 0.382072 | C | 1 |
| 12 | 0.657225 | C | 1 |
| 4  | 0.243597 | C | 1 |
| 3  | 0.620309 | C | 1 |
| 4  | 0.575148 | M | 0 |
| 6  | 0.734534 | C | 1 |
| 5  | 0.49833  | C | 1 |
| 9  | 0.132333 | C | 1 |
| 5  | 0.415285 | C | 1 |
| 18 | 0.382072 | C | 1 |
| 5  | 0.527403 | C | 1 |
| 4  | 0.575148 | M | 0 |
| 5  | 0.307491 | C | 1 |
| 5  | 0.606763 | C | 1 |
| 12 | 0.657225 | C | 1 |
| 5  | 0.40617  | C | 1 |
| 8  | 0.294559 | C | 1 |
| 18 | 0.382072 | C | 1 |
| 1  | 0.200022 | C | 1 |
| 7  | 0.230669 | G | 0 |
| 5  | 0.606763 | C | 1 |
| 5  | 0.502664 | C | 1 |
| 12 | 0.657225 | C | 1 |
| 1  | 0.371599 | C | 1 |
| 3  | 0.068284 | C | 1 |
| 6  | 0.734534 | C | 1 |
| 4  | 0.114211 | C | 1 |
| 5  | 0.277708 | C | 1 |
| 6  | 0.304001 | G | 0 |
| 1  | 0.559798 | M | 0 |
| 12 | 0.657225 | C | 1 |
| 4  | 0.287897 | C | 1 |
| 7  | 0.358462 | C | 1 |
| 5  | 0.527403 | C | 1 |
| 21 | 0.482095 | S | 0 |

|    |          |   |   |
|----|----------|---|---|
| 5  | 0.480619 | C | 1 |
| 18 | 0.329449 | C | 1 |
| 9  | 0.132333 | C | 1 |
| 9  | 0.589945 | C | 1 |
| 4  | 0.575148 | M | 0 |
| 12 | 0.068284 | C | 1 |
| 6  | 0.734534 | C | 1 |
| 5  | 0.272648 | D | 1 |
| 5  | 0.184592 | C | 1 |
| 5  | 0.407236 | C | 1 |
| 1  | 0.200022 | C | 1 |
| 6  | 0.304001 | G | 0 |
| 4  | 0.287897 | C | 1 |
| 5  | 0.307491 | C | 1 |
| 3  | 0.284378 | C | 1 |
| 6  | 0.734534 | C | 1 |
| 12 | 0.068284 | C | 1 |
| 9  | 0.589945 | C | 1 |
| 9  | 0.381069 | C | 1 |
| 4  | 0.521142 | C | 1 |
| 5  | 0.307491 | C | 1 |
| 5  | 0.38065  | C | 1 |
| 6  | 0.734534 | C | 1 |
| 21 | 0.482095 | S | 0 |
| 7  | 0.230669 | G | 0 |
| 4  | 0.463842 | C | 1 |
| 4  | 0.575148 | M | 0 |
| 8  | 0.294559 | C | 1 |
| 5  | 0.415285 | C | 1 |
| 4  | 0.114211 | C | 1 |
| 4  | 0.642423 | M | 0 |
| 6  | 0.304001 | G | 0 |
| 4  | 0.162471 | C | 1 |
| 6  | 0.304001 | G | 0 |
| 3  | 0.284378 | C | 1 |
| 4  | 0.642423 | M | 0 |
| 5  | 0.307491 | C | 1 |
| 3  | 0.284378 | C | 1 |
| 9  | 0.647395 | E | 1 |
| 21 | 0.482095 | S | 0 |
| 5  | 0.415285 | C | 1 |
| 4  | 0.519865 | C | 1 |
| 4  | 0.114211 | C | 1 |
| 5  | 0.452165 | C | 1 |
| 3  | 0.602222 | C | 1 |
| 3  | 0.217259 | I | 0 |
| 7  | 0.358462 | C | 1 |
| 5  | 0.606763 | C | 1 |
| 5  | 0.606763 | C | 1 |
| 5  | 0.49833  | C | 1 |
| 5  | 0.527403 | C | 1 |
| 6  | 0.734534 | C | 1 |
| 12 | 0.657225 | C | 1 |
| 12 | 0.657225 | C | 1 |

|    |          |   |   |
|----|----------|---|---|
| 1  | 0.175459 | C | 1 |
| 4  | 0.350985 | C | 1 |
| 7  | 0.358462 | C | 1 |
| 21 | 0.482095 | S | 0 |
| 5  | 0.527403 | C | 1 |
| 21 | 0.482095 | S | 0 |
| 5  | 0.184592 | C | 1 |
| 5  | 0.184592 | C | 1 |
| 4  | 0.114211 | C | 1 |
| 4  | 0.154718 | C | 1 |
| 4  | 0.521142 | C | 1 |
| 9  | 0.132333 | C | 1 |
| 21 | 0.482095 | S | 0 |
| 4  | 0.575148 | M | 0 |
| 3  | 0.217259 | I | 0 |
| 12 | 0.657225 | C | 1 |
| 3  | 0.068284 | C | 1 |
| 18 | 0.329449 | C | 1 |
| 9  | 0.381069 | C | 1 |
| 4  | 0.472703 | C | 1 |
| 5  | 0.307491 | C | 1 |
| 4  | 0.472703 | C | 1 |
| 12 | 0.657225 | C | 1 |
| 5  | 0.502664 | C | 1 |
| 1  | 0.155342 | C | 1 |
| 4  | 0.126559 | C | 1 |
| 6  | 0.304001 | G | 0 |
| 9  | 0.132333 | C | 1 |
| 4  | 0.154718 | C | 1 |
| 4  | 0.521142 | C | 1 |
| 16 | 0.598815 | S | 0 |
| 3  | 0.068284 | C | 1 |
| 4  | 0.243597 | C | 1 |
| 5  | 0.480619 | C | 1 |
| 5  | 0.527403 | C | 1 |
| 4  | 0.472703 | C | 1 |
| 21 | 0.482095 | S | 0 |
| 1  | 0.155342 | C | 1 |
| 4  | 0.350985 | C | 1 |
| 5  | 0.184592 | C | 1 |
| 5  | 0.49833  | C | 1 |
| 3  | 0.284378 | C | 1 |
| 21 | 0.482095 | S | 0 |
| 12 | 0.657225 | C | 1 |
| 12 | 0.657225 | C | 1 |
| 18 | 0.329449 | C | 1 |
| 12 | 0.657225 | C | 1 |
| 5  | 0.40617  | C | 1 |
| 9  | 0.381069 | C | 1 |
| 9  | 0.499791 | F | 0 |
| 5  | 0.095869 | C | 1 |
| 4  | 0.154718 | C | 1 |
| 5  | 0.452165 | C | 1 |
| 4  | 0.575148 | M | 0 |

|    |          |   |   |
|----|----------|---|---|
| 5  | 0.49833  | C | 1 |
| 18 | 0.329449 | C | 1 |
| 9  | 0.381069 | C | 1 |
| 5  | 0.407236 | C | 1 |
| 1  | 0.371599 | C | 1 |
| 12 | 0.657225 | C | 1 |
| 18 | 0.382072 | C | 1 |
| 1  | 0.200022 | C | 1 |
| 9  | 0.132333 | C | 1 |
| 4  | 0.114211 | C | 1 |
| 4  | 0.472703 | C | 1 |
| 5  | 0.095869 | C | 1 |
| 9  | 0.381069 | C | 1 |
| 5  | 0.307491 | C | 1 |
| 5  | 0.277708 | C | 1 |
| 5  | 0.527403 | C | 1 |
| 5  | 0.452165 | C | 1 |
| 1  | 0.175459 | C | 1 |
| 4  | 0.126559 | C | 1 |
| 4  | 0.126559 | C | 1 |
| 9  | 0.132333 | C | 1 |
| 9  | 0.132333 | C | 1 |
| 5  | 0.38065  | C | 1 |
| 16 | 0.598815 | S | 0 |
| 4  | 0.521142 | C | 1 |
| 7  | 0.358462 | C | 1 |
| 5  | 0.606763 | C | 1 |
| 12 | 0.657225 | C | 1 |
| 21 | 0.482095 | S | 0 |
| 6  | 0.734534 | C | 1 |
| 7  | 0.358462 | C | 1 |
| 4  | 0.521142 | C | 1 |
| 21 | 0.482095 | S | 0 |
| 4  | 0.243597 | C | 1 |
| 9  | 0.589945 | C | 1 |
| 5  | 0.606763 | C | 1 |
| 5  | 0.095869 | C | 1 |
| 5  | 0.502664 | C | 1 |
| 4  | 0.521142 | C | 1 |
| 3  | 0.620309 | C | 1 |
| 8  | 0.499312 | C | 1 |
| 5  | 0.272648 | D | 1 |
| 21 | 0.482095 | S | 0 |
| 4  | 0.350985 | C | 1 |
| 5  | 0.480619 | C | 1 |
| 5  | 0.527403 | C | 1 |
| 12 | 0.657225 | C | 1 |
| 5  | 0.606763 | C | 1 |
| 8  | 0.678906 | C | 1 |
| 4  | 0.162471 | C | 1 |
| 3  | 0.150612 | C | 1 |
| 5  | 0.307491 | C | 1 |
| 5  | 0.407236 | C | 1 |
| 9  | 0.647395 | E | 1 |



|    |          |   |   |
|----|----------|---|---|
| 14 | 0.243372 | C | 1 |
| 19 | 0.213904 | C | 1 |
| 14 | 0.243372 | C | 1 |
| 14 | 0.243372 | C | 1 |
| 18 | 0.178559 | C | 1 |
| 19 | 0.231038 | C | 1 |
| 14 | 0.243372 | C | 1 |
| 19 | 0.213904 | C | 1 |
| 19 | 0.231038 | C | 1 |
| 19 | 0.213904 | C | 1 |
| 19 | 0.231038 | C | 1 |
| 19 | 0.231038 | C | 1 |
| 19 | 0.231038 | C | 1 |
| 18 | 0.178559 | C | 1 |
| 1  | 0.170315 | C | 1 |
| 19 | 0.231038 | C | 1 |
| 19 | 0.231038 | C | 1 |
| 19 | 0.231038 | C | 1 |
| 18 | 0.178559 | C | 1 |
| 1  | 0.170315 | C | 1 |
| 19 | 0.231038 | C | 1 |
| 14 | 0.243372 | C | 1 |
| 14 | 0.243372 | C | 1 |
| 22 | 0.295535 | C | 1 |
| 19 | 0.213904 | C | 1 |
| 19 | 0.231038 | C | 1 |
| 1  | 0.170315 | C | 1 |
| 14 | 0.243372 | C | 1 |
| 22 | 0.295535 | C | 1 |
| 19 | 0.231038 | C | 1 |
| 22 | 0.295535 | C | 1 |
| 19 | 0.231038 | C | 1 |
| 7  | 0.395618 | C | 1 |
| 7  | 0.395618 | C | 1 |
| 7  | 0.395618 | C | 1 |
| 7  | 0.395618 | C | 1 |
| 7  | 0.395618 | C | 1 |
| 7  | 0.395618 | C | 1 |
| 7  | 0.395618 | C | 1 |
| 7  | 0.395618 | C | 1 |
| 7  | 0.395618 | C | 1 |
| 18 | 0.44906  | C | 1 |
| 18 | 0.44906  | C | 1 |
| 18 | 0.44906  | C | 1 |
| 11 | 0.553921 | C | 1 |
| 13 | 0.485816 | C | 1 |
| 11 | 0.553921 | C | 1 |
| 11 | 0.553921 | C | 1 |
| 13 | 0.485816 | C | 1 |
| 13 | 0.485816 | C | 1 |
| 13 | 0.485816 | C | 1 |
| 13 | 0.485816 | C | 1 |
| 16 | 0.721373 | C | 1 |
| 13 | 0.485816 | C | 1 |
| 11 | 0.553921 | C | 1 |
| 12 | 0.78774  | E | 1 |

|    |          |   |   |
|----|----------|---|---|
| 11 | 0.553921 | C | 1 |
| 11 | 0.553921 | C | 1 |
| 13 | 0.485816 | C | 1 |
| 16 | 0.721373 | C | 1 |
| 12 | 0.78774  | E | 1 |
| 11 | 0.553921 | C | 1 |
| 11 | 0.553921 | C | 1 |
| 13 | 0.485816 | C | 1 |
| 13 | 0.485816 | C | 1 |
| 11 | 0.553921 | C | 1 |
| 11 | 0.553921 | C | 1 |
| 16 | 0.721373 | C | 1 |
| 16 | 0.721373 | C | 1 |
| 11 | 0.553921 | C | 1 |
| 16 | 0.721373 | C | 1 |
| 11 | 0.553921 | C | 1 |
| 16 | 0.721373 | C | 1 |
| 12 | 0.78774  | E | 1 |
| 16 | 0.721373 | C | 1 |
| 11 | 0.553921 | C | 1 |
| 11 | 0.553921 | C | 1 |
| 11 | 0.553921 | C | 1 |
| 16 | 0.721373 | C | 1 |
| 13 | 0.485816 | C | 1 |
| 12 | 0.78774  | E | 1 |
| 12 | 0.78774  | E | 1 |
| 11 | 0.553921 | C | 1 |
| 13 | 0.485816 | C | 1 |
| 13 | 0.485816 | C | 1 |
| 11 | 0.553921 | C | 1 |
| 11 | 0.553921 | C | 1 |
| 13 | 0.44949  | C | 1 |
| 13 | 0.44949  | C | 1 |
| 13 | 0.44949  | C | 1 |
| 17 | 0.207618 | C | 1 |
| 17 | 0.207618 | C | 1 |
| 9  | 0.651132 | E | 1 |
| 9  | 0.651132 | E | 1 |
| 9  | 0.651132 | E | 1 |
| 4  | 0.205003 | C | 1 |
| 9  | 0.651132 | E | 1 |
| 4  | 0.205003 | C | 1 |
| 17 | 0.207618 | C | 1 |
| 4  | 0.205003 | C | 1 |
| 4  | 0.205003 | C | 1 |
| 17 | 0.207618 | C | 1 |
| 17 | 0.207618 | C | 1 |
| 4  | 0.205003 | C | 1 |
| 17 | 0.207618 | C | 1 |
| 17 | 0.207618 | C | 1 |
| 4  | 0.205003 | C | 1 |
| 4  | 0.205003 | C | 1 |
| 17 | 0.207618 | C | 1 |
| 17 | 0.207618 | C | 1 |

|    |          |   |   |
|----|----------|---|---|
| 4  | 0.205003 | C | 1 |
| 17 | 0.207618 | C | 1 |
| 17 | 0.207618 | C | 1 |
| 17 | 0.207618 | C | 1 |
| 17 | 0.207618 | C | 1 |
| 9  | 0.651132 | E | 1 |
| 4  | 0.205003 | C | 1 |
| 17 | 0.207618 | C | 1 |
| 17 | 0.207618 | C | 1 |
| 12 | 0.34387  | C | 1 |
| 4  | 0.208347 | B | 1 |
| 8  | 0.656657 | C | 1 |
| 4  | 0.208347 | B | 1 |
| 12 | 0.34387  | C | 1 |
| 12 | 0.34387  | C | 1 |
| 4  | 0.208347 | B | 1 |
| 5  | 0.560583 | C | 1 |
| 19 | 0.617266 | C | 1 |
| 19 | 0.617266 | C | 1 |
| 15 | 0.636907 | E | 1 |
| 19 | 0.617266 | C | 1 |
| 5  | 0.338803 | C | 1 |
| 8  | 0.656657 | C | 1 |
| 5  | 0.338803 | C | 1 |
| 7  | 0.494265 | D | 1 |
| 5  | 0.407457 | C | 1 |
| 3  | 0.446186 | C | 1 |
| 3  | 0.446186 | C | 1 |
| 19 | 0.617266 | C | 1 |
| 8  | 0.656657 | C | 1 |
| 19 | 0.617266 | C | 1 |
| 19 | 0.617266 | C | 1 |
| 19 | 0.617266 | C | 1 |
| 5  | 0.338803 | C | 1 |
| 5  | 0.338803 | C | 1 |
| 4  | 0.208347 | B | 1 |
| 5  | 0.407457 | C | 1 |
| 6  | 0.770145 | L | 0 |
| 12 | 0.34387  | C | 1 |
| 19 | 0.719848 | C | 1 |
| 1  | 0.231842 | C | 1 |
| 15 | 0.240316 | C | 1 |
| 5  | 0.201129 | C | 1 |
| 3  | 0.446186 | C | 1 |
| 15 | 0.240316 | C | 1 |
| 5  | 0.201129 | C | 1 |
| 8  | 0.656657 | C | 1 |
| 8  | 0.656657 | C | 1 |
| 11 | 0.731102 | S | 0 |
| 5  | 0.17031  | C | 1 |
| 11 | 0.394079 | C | 1 |
| 19 | 0.719848 | C | 1 |
| 1  | 0.231842 | C | 1 |
| 5  | 0.407457 | C | 1 |



|    |          |   |   |
|----|----------|---|---|
| 5  | 0.407457 | C | 1 |
| 7  | 0.494265 | D | 1 |
| 3  | 0.446186 | C | 1 |
| 12 | 0.34387  | C | 1 |
| 1  | 0.231842 | C | 1 |
| 3  | 0.446186 | C | 1 |
| 19 | 0.617266 | C | 1 |
| 19 | 0.617266 | C | 1 |
| 18 | 0.547784 | C | 1 |
| 5  | 0.560583 | C | 1 |
| 3  | 0.446186 | C | 1 |
| 18 | 0.547784 | C | 1 |
| 5  | 0.560583 | C | 1 |
| 5  | 0.560583 | C | 1 |
| 19 | 0.617266 | C | 1 |
| 15 | 0.636907 | E | 1 |
| 18 | 0.547784 | C | 1 |
| 5  | 0.407457 | C | 1 |
| 12 | 0.34387  | C | 1 |
| 6  | 0.770145 | L | 0 |
| 11 | 0.394079 | C | 1 |
| 5  | 0.407457 | C | 1 |
| 11 | 0.394079 | C | 1 |
| 5  | 0.201129 | C | 1 |
| 19 | 0.617266 | C | 1 |
| 5  | 0.407457 | C | 1 |
| 5  | 0.17031  | C | 1 |
| 19 | 0.617266 | C | 1 |
| 18 | 0.547784 | C | 1 |
| 11 | 0.394079 | C | 1 |
| 5  | 0.407457 | C | 1 |
| 5  | 0.407457 | C | 1 |
| 19 | 0.719848 | C | 1 |
| 19 | 0.617266 | C | 1 |
| 15 | 0.240316 | C | 1 |
| 19 | 0.617266 | C | 1 |
| 5  | 0.407457 | C | 1 |
| 5  | 0.407457 | C | 1 |
| 6  | 0.770145 | L | 0 |
| 4  | 0.208347 | B | 1 |
| 8  | 0.656657 | C | 1 |
| 19 | 0.719848 | C | 1 |
| 5  | 0.201129 | C | 1 |
| 15 | 0.636907 | E | 1 |
| 5  | 0.338803 | C | 1 |
| 15 | 0.636907 | E | 1 |
| 11 | 0.394079 | C | 1 |
| 11 | 0.394079 | C | 1 |
| 5  | 0.338803 | C | 1 |
| 1  | 0.231842 | C | 1 |
| 11 | 0.394079 | C | 1 |
| 11 | 0.394079 | C | 1 |
| 12 | 0.34387  | C | 1 |
| 11 | 0.731102 | S | 0 |

|    |          |   |   |
|----|----------|---|---|
| 8  | 0.656657 | C | 1 |
| 19 | 0.617266 | C | 1 |
| 6  | 0.770145 | L | 0 |
| 5  | 0.201129 | C | 1 |
| 19 | 0.617266 | C | 1 |
| 19 | 0.617266 | C | 1 |
| 4  | 0.208347 | B | 1 |
| 5  | 0.407457 | C | 1 |
| 5  | 0.560583 | C | 1 |
| 5  | 0.407457 | C | 1 |
| 19 | 0.617266 | C | 1 |
| 5  | 0.407457 | C | 1 |
| 5  | 0.407457 | C | 1 |
| 5  | 0.560583 | C | 1 |
| 5  | 0.560583 | C | 1 |
| 6  | 0.770145 | L | 0 |
| 7  | 0.494265 | D | 1 |
| 11 | 0.394079 | C | 1 |
| 5  | 0.201129 | C | 1 |
| 19 | 0.617266 | C | 1 |
| 1  | 0.231842 | C | 1 |
| 12 | 0.34387  | C | 1 |
| 19 | 0.617266 | C | 1 |
| 5  | 0.407457 | C | 1 |
| 5  | 0.407457 | C | 1 |
| 12 | 0.34387  | C | 1 |
| 7  | 0.494265 | D | 1 |
| 3  | 0.446186 | C | 1 |
| 19 | 0.617266 | C | 1 |
| 8  | 0.656657 | C | 1 |
| 11 | 0.394079 | C | 1 |
| 19 | 0.617266 | C | 1 |
| 1  | 0.231842 | C | 1 |
| 11 | 0.394079 | C | 1 |
| 11 | 0.394079 | C | 1 |
| 18 | 0.547784 | C | 1 |
| 15 | 0.240316 | C | 1 |
| 11 | 0.394079 | C | 1 |
| 5  | 0.407457 | C | 1 |
| 11 | 0.394079 | C | 1 |
| 5  | 0.17031  | C | 1 |
| 7  | 0.494265 | D | 1 |
| 3  | 0.446186 | C | 1 |
| 19 | 0.617266 | C | 1 |
| 11 | 0.394079 | C | 1 |
| 12 | 0.34387  | C | 1 |
| 15 | 0.240316 | C | 1 |
| 11 | 0.731102 | S | 0 |
| 3  | 0.446186 | C | 1 |
| 8  | 0.656657 | C | 1 |
| 5  | 0.407457 | C | 1 |
| 15 | 0.240316 | C | 1 |
| 18 | 0.547784 | C | 1 |
| 11 | 0.394079 | C | 1 |

|    |          |   |   |
|----|----------|---|---|
| 7  | 0.494265 | D | 1 |
| 3  | 0.446186 | C | 1 |
| 19 | 0.719848 | C | 1 |
| 4  | 0.208347 | B | 1 |
| 17 | 0.225619 | C | 1 |
| 17 | 0.225619 | C | 1 |
| 17 | 0.225619 | C | 1 |
| 17 | 0.225619 | C | 1 |
| 17 | 0.225619 | C | 1 |
| 5  | 0.390272 | C | 1 |
| 5  | 0.390272 | C | 1 |
| 5  | 0.390272 | C | 1 |
| 18 | 0.793929 | F | 0 |
| 5  | 0.390272 | C | 1 |
| 18 | 0.793929 | F | 0 |
| 5  | 0.390272 | C | 1 |
| 18 | 0.793929 | F | 0 |
| 18 | 0.793929 | F | 0 |
| 18 | 0.793929 | F | 0 |
| 5  | 0.390272 | C | 1 |
| 5  | 0.390272 | C | 1 |
| 11 | 0.361832 | B | 1 |
| 11 | 0.361832 | B | 1 |
| 11 | 0.361832 | B | 1 |
| 11 | 0.361832 | B | 1 |
| 18 | 0.923242 | C | 1 |
| 18 | 0.923242 | C | 1 |
| 13 | 0.370148 | C | 1 |
| 18 | 0.923242 | C | 1 |
| 18 | 0.923242 | C | 1 |
| 13 | 0.370148 | C | 1 |
| 13 | 0.370148 | C | 1 |
| 18 | 0.923242 | C | 1 |
| 13 | 0.370148 | C | 1 |
| 13 | 0.370148 | C | 1 |
| 13 | 0.370148 | C | 1 |
| 13 | 0.370148 | C | 1 |
| 18 | 0.923242 | C | 1 |
| 13 | 0.370148 | C | 1 |
| 18 | 0.923242 | C | 1 |
| 15 | 0.099066 | C | 1 |
| 3  | 0.232563 | C | 1 |
| 3  | 0.232563 | C | 1 |
| 3  | 0.232563 | C | 1 |
| 1  | 0.068284 | C | 1 |
| 13 | 0.333083 | C | 1 |
| 15 | 0.099066 | C | 1 |
| 3  | 0.232563 | C | 1 |
| 3  | 0.232563 | C | 1 |
| 15 | 0.099066 | C | 1 |
| 13 | 0.333083 | C | 1 |
| 15 | 0.099066 | C | 1 |
| 3  | 0.232563 | C | 1 |
| 1  | 0.068284 | C | 1 |

|    |          |   |   |
|----|----------|---|---|
| 1  | 0.068284 | C | 1 |
| 15 | 0.099066 | C | 1 |
| 1  | 0.068284 | C | 1 |
| 1  | 0.068284 | C | 1 |
| 3  | 0.232563 | C | 1 |
| 3  | 0.232563 | C | 1 |
| 15 | 0.099066 | C | 1 |
| 3  | 0.232563 | C | 1 |
| 3  | 0.232563 | C | 1 |
| 3  | 0.232563 | C | 1 |
| 3  | 0.232563 | C | 1 |
| 3  | 0.232563 | C | 1 |
| 3  | 0.232563 | C | 1 |
| 13 | 0.333083 | C | 1 |
| 8  | 0.596811 | C | 1 |
| 18 | 0.459446 | C | 1 |
| 18 | 0.459446 | C | 1 |
| 21 | 0.345582 | C | 1 |
| 8  | 0.596811 | C | 1 |
| 8  | 0.596811 | C | 1 |
| 8  | 0.596811 | C | 1 |
| 8  | 0.596811 | C | 1 |
| 18 | 0.459446 | C | 1 |
| 8  | 0.596811 | C | 1 |
| 21 | 0.345582 | C | 1 |
| 21 | 0.345582 | C | 1 |
| 8  | 0.596811 | C | 1 |
| 18 | 0.459446 | C | 1 |
| 18 | 0.459446 | C | 1 |
| 8  | 0.596811 | C | 1 |
| 21 | 0.345582 | C | 1 |
| 21 | 0.345582 | C | 1 |
| 21 | 0.345582 | C | 1 |
| 8  | 0.596811 | C | 1 |
| 21 | 0.345582 | C | 1 |
| 18 | 0.459446 | C | 1 |
| 19 | 0.402914 | C | 1 |
| 5  | 0.458231 | C | 1 |
| 5  | 0.458231 | C | 1 |
| 5  | 0.458231 | C | 1 |
| 5  | 0.458231 | C | 1 |
| 5  | 0.458231 | C | 1 |
| 19 | 0.402914 | C | 1 |
| 5  | 0.458231 | C | 1 |
| 5  | 0.458231 | C | 1 |
| 17 | 0.553312 | C | 1 |
| 5  | 0.458231 | C | 1 |
| 19 | 0.402914 | C | 1 |
| 5  | 0.458231 | C | 1 |
| 17 | 0.553312 | C | 1 |
| 5  | 0.458231 | C | 1 |
| 17 | 0.553312 | C | 1 |
| 18 | 0.443723 | C | 1 |
| 19 | 0.402914 | C | 1 |
| 19 | 0.402914 | C | 1 |

|    |          |   |   |
|----|----------|---|---|
| 18 | 0.443723 | C | 1 |
| 17 | 0.553312 | C | 1 |
| 19 | 0.402914 | C | 1 |
| 17 | 0.553312 | C | 1 |
| 17 | 0.553312 | C | 1 |
| 18 | 0.443723 | C | 1 |
| 17 | 0.553312 | C | 1 |
| 18 | 0.443723 | C | 1 |
| 19 | 0.402914 | C | 1 |
| 18 | 0.443723 | C | 1 |
| 16 | 0.509582 | B | 1 |
| 16 | 0.509582 | B | 1 |
| 5  | 0.627509 | C | 1 |
| 5  | 0.627509 | C | 1 |
| 5  | 0.627509 | C | 1 |
| 16 | 0.509582 | B | 1 |
| 5  | 0.627509 | C | 1 |
| 5  | 0.627509 | C | 1 |
| 16 | 0.509582 | B | 1 |
| 5  | 0.283296 | C | 1 |
| 18 | 0.640095 | C | 1 |
| 18 | 0.640095 | C | 1 |
| 5  | 0.283296 | C | 1 |
| 18 | 0.640095 | C | 1 |
| 5  | 0.283296 | C | 1 |
| 5  | 0.283296 | C | 1 |
| 18 | 0.640095 | C | 1 |
| 18 | 0.640095 | C | 1 |
| 18 | 0.640095 | C | 1 |
| 18 | 0.640095 | C | 1 |
| 5  | 0.283296 | C | 1 |
| 5  | 0.283296 | C | 1 |
| 18 | 0.640095 | C | 1 |
| 5  | 0.283296 | C | 1 |
| 18 | 0.640095 | C | 1 |
| 18 | 0.640095 | C | 1 |
| 18 | 0.640095 | C | 1 |
| 18 | 0.640095 | C | 1 |
| 5  | 0.283296 | C | 1 |
| 5  | 0.283296 | C | 1 |
| 5  | 0.283296 | C | 1 |
| 5  | 0.283296 | C | 1 |
| 18 | 0.640095 | C | 1 |
| 18 | 0.640095 | C | 1 |
| 5  | 0.283296 | C | 1 |
| 18 | 0.640095 | C | 1 |
| 18 | 0.640095 | C | 1 |
| 8  | 0.338064 | C | 1 |
| 6  | 0.465863 | C | 1 |
| 4  | 0.418692 | C | 1 |
| 6  | 0.322661 | C | 1 |
| 4  | 0.38734  | I | 0 |
| 13 | 0.772128 | C | 1 |

|    |          |   |   |
|----|----------|---|---|
| 6  | 0.465863 | C | 1 |
| 6  | 0.322661 | C | 1 |
| 19 | 0.534206 | I | 0 |
| 4  | 0.130473 | C | 1 |
| 13 | 0.772128 | C | 1 |
| 5  | 0.394611 | C | 1 |
| 16 | 0.431951 | C | 1 |
| 6  | 0.465863 | C | 1 |
| 16 | 0.431951 | C | 1 |
| 7  | 0.509265 | C | 1 |
| 6  | 0.465863 | C | 1 |
| 4  | 0.319717 | C | 1 |
| 5  | 0.201764 | C | 1 |
| 4  | 0.143916 | C | 1 |
| 5  | 0.394611 | C | 1 |
| 5  | 0.201764 | C | 1 |
| 7  | 0.509265 | C | 1 |
| 7  | 0.509265 | C | 1 |
| 19 | 0.534206 | I | 0 |
| 5  | 0.64776  | E | 1 |
| 19 | 0.534206 | I | 0 |
| 18 | 0.570678 | C | 1 |
| 4  | 0.143916 | C | 1 |
| 13 | 0.772128 | C | 1 |
| 8  | 0.338064 | C | 1 |
| 6  | 0.322661 | C | 1 |
| 16 | 0.431951 | C | 1 |
| 16 | 0.431951 | C | 1 |
| 6  | 0.465863 | C | 1 |
| 4  | 0.319717 | C | 1 |
| 5  | 0.201764 | C | 1 |
| 4  | 0.38734  | I | 0 |
| 19 | 0.534206 | I | 0 |
| 4  | 0.143916 | C | 1 |
| 4  | 0.143916 | C | 1 |
| 5  | 0.394611 | C | 1 |
| 4  | 0.319717 | C | 1 |
| 4  | 0.319717 | C | 1 |
| 13 | 0.772128 | C | 1 |
| 6  | 0.465863 | C | 1 |
| 6  | 0.322661 | C | 1 |
| 16 | 0.431951 | C | 1 |
| 5  | 0.201764 | C | 1 |
| 18 | 0.570678 | C | 1 |
| 16 | 0.431951 | C | 1 |
| 6  | 0.465863 | C | 1 |
| 16 | 0.431951 | C | 1 |
| 8  | 0.338064 | C | 1 |
| 5  | 0.201764 | C | 1 |
| 13 | 0.772128 | C | 1 |
| 19 | 0.534206 | I | 0 |
| 5  | 0.394611 | C | 1 |
| 5  | 0.64776  | E | 1 |
| 6  | 0.322661 | C | 1 |

|    |          |   |   |
|----|----------|---|---|
| 6  | 0.322661 | C | 1 |
| 5  | 0.394611 | C | 1 |
| 4  | 0.130473 | C | 1 |
| 4  | 0.319717 | C | 1 |
| 5  | 0.64776  | E | 1 |
| 4  | 0.130473 | C | 1 |
| 5  | 0.394611 | C | 1 |
| 6  | 0.322661 | C | 1 |
| 5  | 0.64776  | E | 1 |
| 18 | 0.570678 | C | 1 |
| 4  | 0.418692 | C | 1 |
| 5  | 0.64776  | E | 1 |
| 4  | 0.130473 | C | 1 |
| 13 | 0.772128 | C | 1 |
| 6  | 0.465863 | C | 1 |
| 6  | 0.465863 | C | 1 |
| 4  | 0.143916 | C | 1 |
| 7  | 0.509265 | C | 1 |
| 6  | 0.465863 | C | 1 |
| 8  | 0.338064 | C | 1 |
| 4  | 0.143916 | C | 1 |
| 4  | 0.38734  | I | 0 |
| 4  | 0.130473 | C | 1 |
| 6  | 0.465863 | C | 1 |
| 4  | 0.38734  | I | 0 |
| 18 | 0.570678 | C | 1 |
| 5  | 0.394611 | C | 1 |
| 5  | 0.201764 | C | 1 |
| 5  | 0.201764 | C | 1 |
| 4  | 0.143916 | C | 1 |
| 19 | 0.534206 | I | 0 |
| 5  | 0.201764 | C | 1 |
| 5  | 0.201764 | C | 1 |
| 6  | 0.322661 | C | 1 |
| 18 | 0.570678 | C | 1 |
| 6  | 0.465863 | C | 1 |
| 8  | 0.338064 | C | 1 |
| 6  | 0.322661 | C | 1 |
| 5  | 0.64776  | E | 1 |
| 5  | 0.64776  | E | 1 |
| 4  | 0.143916 | C | 1 |
| 19 | 0.534206 | I | 0 |
| 4  | 0.418692 | C | 1 |
| 13 | 0.772128 | C | 1 |
| 5  | 0.394611 | C | 1 |
| 8  | 0.338064 | C | 1 |
| 5  | 0.201764 | C | 1 |
| 18 | 0.570678 | C | 1 |
| 5  | 0.394611 | C | 1 |
| 16 | 0.431951 | C | 1 |
| 1  | 0.682012 | C | 1 |
| 1  | 0.682012 | C | 1 |
| 1  | 0.682012 | C | 1 |
| 18 | 0.57365  | C | 1 |

|    |          |   |   |
|----|----------|---|---|
| 18 | 0.57365  | C | 1 |
| 14 | 0.697933 | C | 1 |
| 15 | 0.509472 | C | 1 |
| 18 | 0.57365  | C | 1 |
| 15 | 0.509472 | C | 1 |
| 15 | 0.509472 | C | 1 |
| 15 | 0.509472 | C | 1 |
| 15 | 0.509472 | C | 1 |
| 15 | 0.509472 | C | 1 |
| 14 | 0.697933 | C | 1 |
| 18 | 0.57365  | C | 1 |
| 14 | 0.697933 | C | 1 |
| 15 | 0.509472 | C | 1 |
| 18 | 0.57365  | C | 1 |
| 18 | 0.57365  | C | 1 |
| 14 | 0.697933 | C | 1 |
| 18 | 0.57365  | C | 1 |
| 14 | 0.697933 | C | 1 |
| 3  | 0.565426 | C | 1 |
| 3  | 0.565426 | C | 1 |
| 3  | 0.565426 | C | 1 |
| 3  | 0.565426 | C | 1 |
| 3  | 0.565426 | C | 1 |
| 3  | 0.565426 | C | 1 |
| 3  | 0.565426 | C | 1 |
| 3  | 0.565426 | C | 1 |
| 3  | 0.565426 | C | 1 |
| 6  | 0.679858 | C | 1 |
| 11 | 0.51511  | A | 0 |
| 11 | 0.51511  | A | 0 |
| 6  | 0.679858 | C | 1 |
| 6  | 0.679858 | C | 1 |
| 11 | 0.51511  | A | 0 |
| 6  | 0.679858 | C | 1 |
| 6  | 0.679858 | C | 1 |
| 6  | 0.679858 | C | 1 |
| 6  | 0.679858 | C | 1 |
| 6  | 0.679858 | C | 1 |
| 6  | 0.679858 | C | 1 |
| 11 | 0.51511  | A | 0 |
| 11 | 0.51511  | A | 0 |
| 11 | 0.51511  | A | 0 |
| 6  | 0.679858 | C | 1 |
| 11 | 0.51511  | A | 0 |
| 6  | 0.679858 | C | 1 |
| 6  | 0.679858 | C | 1 |
| 11 | 0.51511  | A | 0 |
| 5  | 0.292985 | C | 1 |
| 22 | 0.360075 | C | 1 |
| 4  | 0.330891 | C | 1 |
| 15 | 0.387732 | C | 1 |
| 1  | 0.096229 | C | 1 |
| 4  | 0.330891 | C | 1 |
| 4  | 0.360082 | C | 1 |



|    |          |   |   |
|----|----------|---|---|
| 4  | 0.09474  | C | 1 |
| 22 | 0.360075 | C | 1 |
| 11 | 0.522894 | C | 1 |
| 18 | 0.552026 | C | 1 |
| 18 | 0.552026 | C | 1 |
| 3  | 0.224488 | C | 1 |
| 5  | 0.602377 | C | 1 |
| 6  | 0.400345 | R | 0 |
| 5  | 0.292985 | C | 1 |
| 6  | 0.400345 | R | 0 |
| 11 | 0.522894 | C | 1 |
| 11 | 0.522894 | C | 1 |
| 15 | 0.387732 | C | 1 |
| 18 | 0.552026 | C | 1 |
| 22 | 0.360075 | C | 1 |
| 4  | 0.279428 | C | 1 |
| 22 | 0.360075 | C | 1 |
| 4  | 0.330891 | C | 1 |
| 3  | 0.224488 | C | 1 |
| 5  | 0.292985 | C | 1 |
| 18 | 0.552026 | C | 1 |
| 18 | 0.552026 | C | 1 |
| 18 | 0.552026 | C | 1 |
| 4  | 0.279428 | C | 1 |
| 4  | 0.360082 | C | 1 |
| 11 | 0.522894 | C | 1 |
| 18 | 0.552026 | C | 1 |
| 18 | 0.552026 | C | 1 |
| 5  | 0.602377 | C | 1 |
| 4  | 0.09474  | C | 1 |
| 4  | 0.09474  | C | 1 |
| 4  | 0.129431 | I | 0 |
| 9  | 0.310909 | C | 1 |
| 18 | 0.552026 | C | 1 |
| 5  | 0.602377 | C | 1 |
| 5  | 0.602377 | C | 1 |
| 15 | 0.387732 | C | 1 |
| 11 | 0.522894 | C | 1 |
| 8  | 0.663167 | C | 1 |
| 4  | 0.09474  | C | 1 |
| 4  | 0.09474  | C | 1 |
| 8  | 0.663167 | C | 1 |
| 4  | 0.09474  | C | 1 |
| 15 | 0.387732 | C | 1 |
| 8  | 0.663167 | C | 1 |
| 5  | 0.602377 | C | 1 |
| 4  | 0.330891 | C | 1 |
| 8  | 0.663167 | C | 1 |
| 22 | 0.360075 | C | 1 |
| 11 | 0.522894 | C | 1 |
| 3  | 0.224488 | C | 1 |
| 5  | 0.602377 | C | 1 |
| 1  | 0.096229 | C | 1 |
| 18 | 0.552026 | C | 1 |

|    |          |   |   |
|----|----------|---|---|
| 11 | 0.522894 | C | 1 |
| 18 | 0.552026 | C | 1 |
| 5  | 0.602377 | C | 1 |
| 22 | 0.360075 | C | 1 |
| 9  | 0.310909 | C | 1 |
| 18 | 0.552026 | C | 1 |
| 3  | 0.224488 | C | 1 |
| 1  | 0.096229 | C | 1 |
| 4  | 0.129431 | I | 0 |
| 4  | 0.129431 | I | 0 |
| 8  | 0.663167 | C | 1 |
| 4  | 0.129431 | I | 0 |
| 4  | 0.279428 | C | 1 |
| 22 | 0.360075 | C | 1 |
| 9  | 0.310909 | C | 1 |
| 22 | 0.360075 | C | 1 |
| 4  | 0.09474  | C | 1 |
| 4  | 0.09474  | C | 1 |
| 6  | 0.400345 | R | 0 |
| 8  | 0.663167 | C | 1 |
| 4  | 0.129431 | I | 0 |
| 18 | 0.552026 | C | 1 |
| 11 | 0.522894 | C | 1 |
| 6  | 0.400345 | R | 0 |
| 11 | 0.522894 | C | 1 |
| 15 | 0.387732 | C | 1 |
| 1  | 0.096229 | C | 1 |
| 11 | 0.522894 | C | 1 |
| 11 | 0.522894 | C | 1 |
| 4  | 0.279428 | C | 1 |
| 5  | 0.292985 | C | 1 |
| 11 | 0.522894 | C | 1 |
| 22 | 0.360075 | C | 1 |
| 4  | 0.330891 | C | 1 |
| 22 | 0.360075 | C | 1 |
| 11 | 0.522894 | C | 1 |
| 5  | 0.602377 | C | 1 |
| 11 | 0.522894 | C | 1 |
| 9  | 0.310909 | C | 1 |
| 11 | 0.522894 | C | 1 |
| 11 | 0.522894 | C | 1 |
| 8  | 0.663167 | C | 1 |
| 15 | 0.387732 | C | 1 |
| 4  | 0.09474  | C | 1 |
| 11 | 0.522894 | C | 1 |
| 4  | 0.279428 | C | 1 |
| 5  | 0.602377 | C | 1 |
| 22 | 0.360075 | C | 1 |
| 4  | 0.09474  | C | 1 |
| 4  | 0.360082 | C | 1 |
| 3  | 0.224488 | C | 1 |
| 3  | 0.224488 | C | 1 |
| 11 | 0.522894 | C | 1 |
| 1  | 0.096229 | C | 1 |

|    |          |   |   |
|----|----------|---|---|
| 18 | 0.552026 | C | 1 |
| 11 | 0.522894 | C | 1 |
| 18 | 0.552026 | C | 1 |
| 5  | 0.292985 | C | 1 |
| 9  | 0.310909 | C | 1 |
| 3  | 0.224488 | C | 1 |
| 11 | 0.650217 | C | 1 |
| 13 | 0.304458 | C | 1 |
| 8  | 0.511169 | C | 1 |
| 13 | 0.304458 | C | 1 |
| 11 | 0.650217 | C | 1 |
| 13 | 0.304458 | C | 1 |
| 13 | 0.304458 | C | 1 |
| 15 | 0.408114 | C | 1 |
| 19 | 0.66883  | C | 1 |
| 15 | 0.408114 | C | 1 |
| 19 | 0.66883  | C | 1 |
| 19 | 0.66883  | C | 1 |
| 19 | 0.66883  | C | 1 |
| 19 | 0.66883  | C | 1 |
| 8  | 0.511169 | C | 1 |
| 19 | 0.66883  | C | 1 |
| 19 | 0.66883  | C | 1 |
| 19 | 0.66883  | C | 1 |
| 11 | 0.650217 | C | 1 |
| 15 | 0.408114 | C | 1 |
| 19 | 0.66883  | C | 1 |
| 8  | 0.511169 | C | 1 |
| 15 | 0.408114 | C | 1 |
| 11 | 0.650217 | C | 1 |
| 19 | 0.66883  | C | 1 |
| 19 | 0.66883  | C | 1 |
| 15 | 0.408114 | C | 1 |
| 13 | 0.304458 | C | 1 |
| 13 | 0.304458 | C | 1 |
| 19 | 0.66883  | C | 1 |
| 19 | 0.66883  | C | 1 |
| 11 | 0.650217 | C | 1 |
| 19 | 0.66883  | C | 1 |
| 11 | 0.650217 | C | 1 |
| 19 | 0.66883  | C | 1 |
| 13 | 0.304458 | C | 1 |
| 19 | 0.66883  | C | 1 |
| 15 | 0.408114 | C | 1 |
| 11 | 0.650217 | C | 1 |
| 13 | 0.304458 | C | 1 |
| 13 | 0.304458 | C | 1 |
| 15 | 0.408114 | C | 1 |
| 19 | 0.382771 | C | 1 |
| 17 | 0.815679 | D | 1 |
| 17 | 0.815679 | D | 1 |
| 19 | 0.382771 | C | 1 |
| 17 | 0.815679 | D | 1 |
| 17 | 0.815679 | D | 1 |

|    |          |   |   |
|----|----------|---|---|
| 17 | 0.815679 | D | 1 |
| 17 | 0.815679 | D | 1 |
| 19 | 0.382771 | C | 1 |
| 19 | 0.382771 | C | 1 |
| 17 | 0.815679 | D | 1 |
| 17 | 0.815679 | D | 1 |
| 17 | 0.815679 | D | 1 |
| 3  | 0.398485 | C | 1 |
| 3  | 0.398485 | C | 1 |
| 3  | 0.398485 | C | 1 |
| 16 | 0.625825 | C | 1 |
| 16 | 0.625825 | C | 1 |
| 7  | 0.271255 | C | 1 |
| 4  | 0.198743 | C | 1 |
| 9  | 0.658112 | K | 1 |
| 8  | 0.183717 | C | 1 |
| 7  | 0.271255 | C | 1 |
| 21 | 0.495069 | C | 1 |
| 4  | 0.198743 | C | 1 |
| 8  | 0.183717 | C | 1 |
| 16 | 0.625825 | C | 1 |
| 9  | 0.658112 | K | 1 |
| 14 | 0.311769 | C | 1 |
| 7  | 0.271255 | C | 1 |
| 14 | 0.311769 | C | 1 |
| 16 | 0.625825 | C | 1 |
| 21 | 0.495069 | C | 1 |
| 9  | 0.658112 | K | 1 |
| 4  | 0.198743 | C | 1 |
| 8  | 0.183717 | C | 1 |
| 14 | 0.311769 | C | 1 |
| 16 | 0.625825 | C | 1 |
| 16 | 0.625825 | C | 1 |
| 8  | 0.183717 | C | 1 |
| 21 | 0.495069 | C | 1 |
| 7  | 0.271255 | C | 1 |
| 4  | 0.198743 | C | 1 |
| 14 | 0.311769 | C | 1 |
| 16 | 0.625825 | C | 1 |
| 16 | 0.625825 | C | 1 |
| 16 | 0.625825 | C | 1 |
| 16 | 0.625825 | C | 1 |
| 14 | 0.311769 | C | 1 |
| 14 | 0.311769 | C | 1 |
| 7  | 0.271255 | C | 1 |
| 16 | 0.625825 | C | 1 |
| 9  | 0.658112 | K | 1 |
| 19 | 0.191004 | C | 1 |
| 7  | 0.271255 | C | 1 |
| 7  | 0.271255 | C | 1 |
| 21 | 0.495069 | C | 1 |
| 16 | 0.625825 | C | 1 |
| 14 | 0.311769 | C | 1 |
| 16 | 0.625825 | C | 1 |

|    |          |   |   |
|----|----------|---|---|
| 19 | 0.191004 | C | 1 |
| 16 | 0.625825 | C | 1 |
| 16 | 0.625825 | C | 1 |
| 4  | 0.198743 | C | 1 |
| 16 | 0.625825 | C | 1 |
| 9  | 0.658112 | K | 1 |
| 16 | 0.625825 | C | 1 |
| 7  | 0.271255 | C | 1 |
| 8  | 0.183717 | C | 1 |
| 21 | 0.495069 | C | 1 |
| 14 | 0.311769 | C | 1 |
| 8  | 0.183717 | C | 1 |
| 8  | 0.183717 | C | 1 |
| 14 | 0.311769 | C | 1 |
| 16 | 0.625825 | C | 1 |
| 16 | 0.625825 | C | 1 |
| 9  | 0.658112 | K | 1 |
| 4  | 0.198743 | C | 1 |
| 16 | 0.625825 | C | 1 |
| 19 | 0.191004 | C | 1 |
| 14 | 0.311769 | C | 1 |
| 7  | 0.271255 | C | 1 |
| 20 | 0.732729 | C | 1 |
| 18 | 0.669672 | C | 1 |
| 17 | 0.498417 | C | 1 |
| 5  | 0.149377 | C | 1 |
| 17 | 0.498417 | C | 1 |
| 1  | 0.272218 | C | 1 |
| 19 | 0.367581 | C | 1 |
| 22 | 0.343888 | C | 1 |
| 19 | 0.367581 | C | 1 |
| 18 | 0.669672 | C | 1 |
| 5  | 0.149377 | C | 1 |
| 15 | 0.663472 | D | 1 |
| 17 | 0.686285 | C | 1 |
| 19 | 0.367581 | C | 1 |
| 19 | 0.367581 | C | 1 |
| 22 | 0.343888 | C | 1 |
| 22 | 0.343888 | C | 1 |
| 5  | 0.149377 | C | 1 |
| 7  | 0.356432 | I | 0 |
| 20 | 0.732729 | C | 1 |
| 20 | 0.732729 | C | 1 |
| 22 | 0.343888 | C | 1 |
| 22 | 0.343888 | C | 1 |
| 19 | 0.367581 | C | 1 |
| 15 | 0.663472 | D | 1 |
| 19 | 0.361767 | C | 1 |
| 22 | 0.343888 | C | 1 |
| 19 | 0.367581 | C | 1 |
| 18 | 0.669672 | C | 1 |
| 22 | 0.343888 | C | 1 |
| 1  | 0.272218 | C | 1 |
| 22 | 0.343888 | C | 1 |

|    |          |   |   |
|----|----------|---|---|
| 18 | 0.669672 | C | 1 |
| 17 | 0.686285 | C | 1 |
| 18 | 0.669672 | C | 1 |
| 7  | 0.356432 | I | 0 |
| 17 | 0.498417 | C | 1 |
| 19 | 0.361767 | C | 1 |
| 1  | 0.272218 | C | 1 |
| 7  | 0.356432 | I | 0 |
| 17 | 0.498417 | C | 1 |
| 7  | 0.356432 | I | 0 |
| 19 | 0.361767 | C | 1 |
| 19 | 0.361767 | C | 1 |
| 20 | 0.732729 | C | 1 |
| 17 | 0.498417 | C | 1 |
| 18 | 0.669672 | C | 1 |
| 22 | 0.343888 | C | 1 |
| 22 | 0.343888 | C | 1 |
| 22 | 0.343888 | C | 1 |
| 18 | 0.669672 | C | 1 |
| 19 | 0.361767 | C | 1 |
| 19 | 0.367581 | C | 1 |
| 19 | 0.367581 | C | 1 |
| 20 | 0.732729 | C | 1 |
| 5  | 0.149377 | C | 1 |
| 20 | 0.732729 | C | 1 |
| 1  | 0.272218 | C | 1 |
| 19 | 0.361767 | C | 1 |
| 22 | 0.343888 | C | 1 |
| 20 | 0.732729 | C | 1 |
| 22 | 0.343888 | C | 1 |
| 19 | 0.367581 | C | 1 |
| 20 | 0.732729 | C | 1 |
| 1  | 0.272218 | C | 1 |
| 18 | 0.669672 | C | 1 |
| 18 | 0.669672 | C | 1 |
| 22 | 0.343888 | C | 1 |
| 20 | 0.732729 | C | 1 |
| 17 | 0.686285 | C | 1 |
| 19 | 0.361767 | C | 1 |
| 19 | 0.367581 | C | 1 |
| 19 | 0.367581 | C | 1 |
| 5  | 0.149377 | C | 1 |
| 5  | 0.149377 | C | 1 |
| 22 | 0.343888 | C | 1 |
| 17 | 0.686285 | C | 1 |
| 19 | 0.367581 | C | 1 |
| 20 | 0.732729 | C | 1 |
| 17 | 0.686285 | C | 1 |
| 5  | 0.149377 | C | 1 |
| 20 | 0.732729 | C | 1 |
| 5  | 0.149377 | C | 1 |
| 1  | 0.272218 | C | 1 |
| 18 | 0.669672 | C | 1 |
| 22 | 0.343888 | C | 1 |

|    |          |   |   |
|----|----------|---|---|
| 5  | 0.149377 | C | 1 |
| 7  | 0.356432 | I | 0 |
| 20 | 0.732729 | C | 1 |
| 19 | 0.361767 | C | 1 |
| 7  | 0.356432 | I | 0 |
| 15 | 0.663472 | D | 1 |
| 1  | 0.272218 | C | 1 |
| 18 | 0.669672 | C | 1 |
| 19 | 0.367581 | C | 1 |
| 22 | 0.343888 | C | 1 |
| 18 | 0.669672 | C | 1 |
| 7  | 0.356432 | I | 0 |
| 5  | 0.293547 | C | 1 |
| 15 | 0.511517 | A | 0 |
| 1  | 0.126508 | C | 1 |
| 4  | 0.113698 | C | 1 |
| 7  | 0.175296 | I | 0 |
| 9  | 0.61638  | C | 1 |
| 4  | 0.423356 | N | 0 |
| 19 | 0.563511 | C | 1 |
| 4  | 0.113698 | C | 1 |
| 6  | 0.232578 | Q | 0 |
| 4  | 0.113698 | C | 1 |
| 1  | 0.126508 | C | 1 |
| 19 | 0.563511 | C | 1 |
| 16 | 0.860471 | C | 1 |
| 5  | 0.212631 | C | 1 |
| 5  | 0.212631 | C | 1 |
| 14 | 0.452653 | G | 0 |
| 14 | 0.452653 | G | 0 |
| 5  | 0.323951 | C | 1 |
| 12 | 0.44153  | C | 1 |
| 14 | 0.452653 | G | 0 |
| 16 | 0.860471 | C | 1 |
| 3  | 0.183792 |   | 0 |
| 3  | 0.070383 | C | 1 |
| 3  | 0.315925 | C | 1 |
| 12 | 0.44153  | C | 1 |
| 3  | 0.183792 |   | 0 |
| 16 | 0.622191 | G | 0 |
| 5  | 0.323951 | C | 1 |
| 4  | 0.113698 | C | 1 |
| 5  | 0.281726 | R | 0 |
| 15 | 0.566712 | C | 1 |
| 5  | 0.212631 | C | 1 |
| 12 | 0.434742 | I | 0 |
| 19 | 0.80338  | D | 1 |
| 15 | 0.152761 | C | 1 |
| 15 | 0.566712 | C | 1 |
| 6  | 0.402616 | C | 1 |
| 14 | 0.452653 | G | 0 |
| 12 | 0.44153  | C | 1 |
| 19 | 0.80338  | D | 1 |
| 5  | 0.323951 | C | 1 |

|    |          |   |   |
|----|----------|---|---|
| 12 | 0.44153  | C | 1 |
| 3  | 0.183792 |   | 0 |
| 9  | 0.61638  | C | 1 |
| 15 | 0.566712 | C | 1 |
| 5  | 0.323951 | C | 1 |
| 15 | 0.152761 | C | 1 |
| 7  | 0.175296 | I | 0 |
| 16 | 0.622191 | G | 0 |
| 4  | 0.113698 | C | 1 |
| 15 | 0.566712 | C | 1 |
| 4  | 0.423356 | N | 0 |
| 5  | 0.212631 | C | 1 |
| 15 | 0.566712 | C | 1 |
| 5  | 0.293547 | C | 1 |
| 15 | 0.152761 | C | 1 |
| 15 | 0.566712 | C | 1 |
| 19 | 0.80338  | D | 1 |
| 7  | 0.175296 | I | 0 |
| 7  | 0.175296 | I | 0 |
| 7  | 0.175296 | I | 0 |
| 16 | 0.860471 | C | 1 |
| 5  | 0.281726 | R | 0 |
| 9  | 0.61638  | C | 1 |
| 9  | 0.61638  | C | 1 |
| 12 | 0.44153  | C | 1 |
| 1  | 0.363301 | C | 1 |
| 3  | 0.070383 | C | 1 |
| 19 | 0.80338  | D | 1 |
| 3  | 0.183792 |   | 0 |
| 4  | 0.423356 | N | 0 |
| 9  | 0.61638  | C | 1 |
| 9  | 0.61638  | C | 1 |
| 15 | 0.152761 | C | 1 |
| 6  | 0.402616 | C | 1 |
| 15 | 0.566712 | C | 1 |
| 16 | 0.622191 | G | 0 |
| 15 | 0.511517 | A | 0 |
| 6  | 0.232578 | Q | 0 |
| 1  | 0.363301 | C | 1 |
| 1  | 0.126508 | C | 1 |
| 19 | 0.80338  | D | 1 |
| 16 | 0.622191 | G | 0 |
| 7  | 0.175296 | I | 0 |
| 15 | 0.511517 | A | 0 |
| 5  | 0.212631 | C | 1 |
| 5  | 0.212631 | C | 1 |
| 5  | 0.293547 | C | 1 |
| 16 | 0.860471 | C | 1 |
| 19 | 0.80338  | D | 1 |
| 15 | 0.566712 | C | 1 |
| 15 | 0.566712 | C | 1 |
| 15 | 0.152761 | C | 1 |
| 5  | 0.281726 | R | 0 |
| 9  | 0.61638  | C | 1 |



|    |          |   |   |
|----|----------|---|---|
| 3  | 0.214447 | C | 1 |
| 16 | 0.860471 | C | 1 |
| 3  | 0.183792 |   | 0 |
| 7  | 0.175296 | I | 0 |
| 15 | 0.566712 | C | 1 |
| 4  | 0.113698 | C | 1 |
| 3  | 0.183792 |   | 0 |
| 5  | 0.281726 | R | 0 |
| 3  | 0.183792 |   | 0 |
| 4  | 0.113698 | C | 1 |
| 5  | 0.281726 | R | 0 |
| 1  | 0.126508 | C | 1 |
| 15 | 0.566712 | C | 1 |
| 15 | 0.566712 | C | 1 |
| 6  | 0.402616 | C | 1 |
| 15 | 0.152761 | C | 1 |
| 3  | 0.070383 | C | 1 |
| 4  | 0.113698 | C | 1 |
| 14 | 0.452653 | G | 0 |
| 19 | 0.80338  | D | 1 |
| 9  | 0.61638  | C | 1 |
| 15 | 0.566712 | C | 1 |
| 1  | 0.126508 | C | 1 |
| 4  | 0.423356 | N | 0 |
| 15 | 0.511517 | A | 0 |
| 12 | 0.44153  | C | 1 |
| 19 | 0.80338  | D | 1 |
| 12 | 0.44153  | C | 1 |
| 16 | 0.860471 | C | 1 |
| 15 | 0.152761 | C | 1 |
| 5  | 0.293547 | C | 1 |
| 6  | 0.402616 | C | 1 |
| 3  | 0.315925 | C | 1 |
| 16 | 0.622191 | G | 0 |
| 15 | 0.511517 | A | 0 |
| 5  | 0.323951 | C | 1 |
| 6  | 0.402616 | C | 1 |
| 19 | 0.563511 | C | 1 |
| 6  | 0.232578 | Q | 0 |
| 3  | 0.315925 | C | 1 |
| 15 | 0.566712 | C | 1 |
| 19 | 0.80338  | D | 1 |
| 3  | 0.214447 | C | 1 |
| 6  | 0.232578 | Q | 0 |
| 6  | 0.232578 | Q | 0 |
| 3  | 0.315925 | C | 1 |
| 16 | 0.860471 | C | 1 |
| 19 | 0.80338  | D | 1 |
| 19 | 0.80338  | D | 1 |
| 15 | 0.152761 | C | 1 |
| 12 | 0.44153  | C | 1 |
| 7  | 0.175296 | I | 0 |
| 15 | 0.152761 | C | 1 |
| 12 | 0.434742 | I | 0 |

|    |          |   |   |
|----|----------|---|---|
| 9  | 0.61638  | C | 1 |
| 6  | 0.232578 | Q | 0 |
| 12 | 0.44153  | C | 1 |
| 1  | 0.126508 | C | 1 |
| 19 | 0.80338  | D | 1 |
| 15 | 0.566712 | C | 1 |
| 3  | 0.183792 |   | 0 |
| 4  | 0.113698 | C | 1 |
| 19 | 0.80338  | D | 1 |
| 14 | 0.452653 | G | 0 |
| 15 | 0.566712 | C | 1 |
| 19 | 0.80338  | D | 1 |
| 4  | 0.113698 | C | 1 |
| 5  | 0.212631 | C | 1 |
| 12 | 0.44153  | C | 1 |
| 15 | 0.152761 | C | 1 |
| 12 | 0.44153  | C | 1 |
| 9  | 0.61638  | C | 1 |
| 5  | 0.323951 | C | 1 |
| 15 | 0.152761 | C | 1 |
| 1  | 0.363301 | C | 1 |
| 19 | 0.563511 | C | 1 |
| 7  | 0.175296 | I | 0 |
| 7  | 0.175296 | I | 0 |
| 6  | 0.402616 | C | 1 |
| 12 | 0.434742 | I | 0 |
| 3  | 0.183792 |   | 0 |
| 19 | 0.80338  | D | 1 |
| 9  | 0.61638  | C | 1 |
| 19 | 0.563511 | C | 1 |
| 19 | 0.563511 | C | 1 |
| 19 | 0.563511 | C | 1 |
| 19 | 0.563511 | C | 1 |
| 5  | 0.281726 | R | 0 |
| 15 | 0.511517 | A | 0 |
| 15 | 0.566712 | C | 1 |
| 12 | 0.44153  | C | 1 |
| 4  | 0.423356 | N | 0 |
| 19 | 0.563511 | C | 1 |
| 6  | 0.402616 | C | 1 |
| 3  | 0.214447 | C | 1 |
| 19 | 0.563511 | C | 1 |
| 5  | 0.293547 | C | 1 |
| 3  | 0.315925 | C | 1 |
| 3  | 0.070383 | C | 1 |
| 4  | 0.501177 | C | 1 |
| 9  | 0.65298  | B | 1 |
| 9  | 0.65298  | B | 1 |
| 4  | 0.501177 | C | 1 |
| 9  | 0.65298  | B | 1 |
| 4  | 0.501177 | C | 1 |
| 4  | 0.501177 | C | 1 |
| 4  | 0.501177 | C | 1 |
| 9  | 0.65298  | B | 1 |

|    |          |   |   |
|----|----------|---|---|
| 9  | 0.65298  | B | 1 |
| 9  | 0.65298  | B | 1 |
| 4  | 0.501177 | C | 1 |
| 4  | 0.501177 | C | 1 |
| 4  | 0.501177 | C | 1 |
| 4  | 0.501177 | C | 1 |
| 4  | 0.501177 | C | 1 |
| 9  | 0.65298  | B | 1 |
| 4  | 0.501177 | C | 1 |
| 9  | 0.65298  | B | 1 |
| 5  | 0.32005  | C | 1 |
| 5  | 0.32005  | C | 1 |
| 5  | 0.32005  | C | 1 |
| 5  | 0.32005  | C | 1 |
| 5  | 0.32005  | C | 1 |
| 15 | 0.804554 | C | 1 |
| 15 | 0.804554 | C | 1 |
| 15 | 0.804554 | C | 1 |
| 15 | 0.804554 | C | 1 |
| 15 | 0.804554 | C | 1 |
| 5  | 0.172517 | C | 1 |
| 5  | 0.172517 | C | 1 |
| 5  | 0.172517 | C | 1 |
| 5  | 0.172517 | C | 1 |
| 5  | 0.172517 | C | 1 |
| 5  | 0.172517 | C | 1 |
| 5  | 0.172517 | C | 1 |
| 5  | 0.172517 | C | 1 |
| 5  | 0.172517 | C | 1 |
| 5  | 0.172517 | C | 1 |
| 5  | 0.172517 | C | 1 |
| 5  | 0.172517 | C | 1 |
| 5  | 0.172517 | C | 1 |
| 5  | 0.172517 | C | 1 |
| 5  | 0.172517 | C | 1 |
| 5  | 0.172517 | C | 1 |
| 5  | 0.172517 | C | 1 |
| 5  | 0.172517 | C | 1 |
| 5  | 0.172517 | C | 1 |
| 15 | 0.624095 | C | 1 |
| 9  | 0.44668  | C | 1 |
| 4  | 0.377158 | C | 1 |
| 5  | 0.334025 | C | 1 |
| 22 | 0.432783 | C | 1 |
| 6  | 0.582114 | C | 1 |
| 18 | 0.415614 | C | 1 |
| 9  | 0.44668  | C | 1 |
| 22 | 0.573434 | C | 1 |
| 9  | 0.44668  | C | 1 |
| 4  | 0.458394 | C | 1 |
| 4  | 0.362649 | C | 1 |
| 6  | 0.582114 | C | 1 |
| 9  | 0.44668  | C | 1 |
| 6  | 0.582114 | C | 1 |
| 4  | 0.66316  | C | 1 |
| 9  | 0.580814 | C | 1 |
| 19 | 0.560562 | C | 1 |

|    |          |   |   |
|----|----------|---|---|
| 13 | 0.487361 | C | 1 |
| 4  | 0.377158 | C | 1 |
| 4  | 0.377158 | C | 1 |
| 4  | 0.377158 | C | 1 |
| 4  | 0.458394 | C | 1 |
| 9  | 0.580814 | C | 1 |
| 15 | 0.624095 | C | 1 |
| 18 | 0.415614 | C | 1 |
| 4  | 0.080968 | I | 0 |
| 18 | 0.415614 | C | 1 |
| 19 | 0.560562 | C | 1 |
| 4  | 0.362649 | C | 1 |
| 19 | 0.560562 | C | 1 |
| 22 | 0.432783 | C | 1 |
| 22 | 0.573434 | C | 1 |
| 9  | 0.44668  | C | 1 |
| 22 | 0.573434 | C | 1 |
| 19 | 0.560562 | C | 1 |
| 22 | 0.573434 | C | 1 |
| 4  | 0.080968 | I | 0 |
| 22 | 0.573434 | C | 1 |
| 18 | 0.415614 | C | 1 |
| 5  | 0.476141 | C | 1 |
| 5  | 0.476141 | C | 1 |
| 22 | 0.573434 | C | 1 |
| 18 | 0.415614 | C | 1 |
| 6  | 0.582114 | C | 1 |
| 4  | 0.377158 | C | 1 |
| 4  | 0.458394 | C | 1 |
| 22 | 0.573434 | C | 1 |
| 22 | 0.432783 | C | 1 |
| 13 | 0.487361 | C | 1 |
| 22 | 0.573434 | C | 1 |
| 6  | 0.582114 | C | 1 |
| 6  | 0.582114 | C | 1 |
| 22 | 0.573434 | C | 1 |
| 15 | 0.624095 | C | 1 |
| 18 | 0.415614 | C | 1 |
| 15 | 0.624095 | C | 1 |
| 5  | 0.476141 | C | 1 |
| 6  | 0.582114 | C | 1 |
| 4  | 0.377158 | C | 1 |
| 22 | 0.573434 | C | 1 |
| 19 | 0.560562 | C | 1 |
| 19 | 0.560562 | C | 1 |
| 22 | 0.573434 | C | 1 |
| 15 | 0.624095 | C | 1 |
| 15 | 0.624095 | C | 1 |
| 22 | 0.432783 | C | 1 |
| 4  | 0.377158 | C | 1 |
| 22 | 0.432783 | C | 1 |
| 22 | 0.432783 | C | 1 |
| 4  | 0.66316  | C | 1 |
| 4  | 0.458394 | C | 1 |

|    |          |   |   |
|----|----------|---|---|
| 5  | 0.476141 | C | 1 |
| 9  | 0.580814 | C | 1 |
| 13 | 0.487361 | C | 1 |
| 18 | 0.415614 | C | 1 |
| 22 | 0.573434 | C | 1 |
| 6  | 0.582114 | C | 1 |
| 4  | 0.66316  | C | 1 |
| 4  | 0.362649 | C | 1 |
| 15 | 0.624095 | C | 1 |
| 13 | 0.487361 | C | 1 |
| 22 | 0.573434 | C | 1 |
| 5  | 0.476141 | C | 1 |
| 4  | 0.080968 | I | 0 |
| 9  | 0.580814 | C | 1 |
| 22 | 0.573434 | C | 1 |
| 22 | 0.573434 | C | 1 |
| 22 | 0.573434 | C | 1 |
| 22 | 0.573434 | C | 1 |
| 22 | 0.573434 | C | 1 |
| 22 | 0.573434 | C | 1 |
| 22 | 0.573434 | C | 1 |
| 4  | 0.080968 | I | 0 |
| 22 | 0.573434 | C | 1 |
| 22 | 0.573434 | C | 1 |
| 5  | 0.476141 | C | 1 |
| 22 | 0.573434 | C | 1 |
| 5  | 0.476141 | C | 1 |
| 15 | 0.624095 | C | 1 |
| 15 | 0.624095 | C | 1 |
| 18 | 0.415614 | C | 1 |
| 9  | 0.44668  | C | 1 |
| 5  | 0.334025 | C | 1 |
| 4  | 0.377158 | C | 1 |
| 18 | 0.415614 | C | 1 |
| 22 | 0.573434 | C | 1 |
| 22 | 0.573434 | C | 1 |
| 4  | 0.458394 | C | 1 |
| 22 | 0.573434 | C | 1 |
| 6  | 0.582114 | C | 1 |
| 22 | 0.573434 | C | 1 |
| 22 | 0.573434 | C | 1 |
| 5  | 0.476141 | C | 1 |
| 4  | 0.377158 | C | 1 |
| 13 | 0.487361 | C | 1 |
| 22 | 0.573434 | C | 1 |
| 5  | 0.334025 | C | 1 |
| 9  | 0.44668  | C | 1 |
| 18 | 0.415614 | C | 1 |
| 22 | 0.573434 | C | 1 |
| 15 | 0.624095 | C | 1 |
| 4  | 0.080968 | I | 0 |
| 4  | 0.377158 | C | 1 |
| 18 | 0.415614 | C | 1 |
| 4  | 0.362649 | C | 1 |
| 19 | 0.560562 | C | 1 |

|    |          |   |   |
|----|----------|---|---|
| 15 | 0.624095 | C | 1 |
| 5  | 0.334025 | C | 1 |
| 15 | 0.624095 | C | 1 |
| 18 | 0.415614 | C | 1 |
| 6  | 0.582114 | C | 1 |
| 18 | 0.415614 | C | 1 |
| 4  | 0.66316  | C | 1 |
| 5  | 0.334025 | C | 1 |
| 9  | 0.44668  | C | 1 |
| 9  | 0.44668  | C | 1 |
| 4  | 0.66316  | C | 1 |
| 9  | 0.44668  | C | 1 |
| 5  | 0.334025 | C | 1 |
| 22 | 0.573434 | C | 1 |
| 22 | 0.573434 | C | 1 |
| 4  | 0.66316  | C | 1 |
| 9  | 0.580814 | C | 1 |
| 4  | 0.377158 | C | 1 |
| 22 | 0.573434 | C | 1 |
| 6  | 0.582114 | C | 1 |
| 4  | 0.362649 | C | 1 |
| 5  | 0.334025 | C | 1 |
| 22 | 0.573434 | C | 1 |
| 9  | 0.44668  | C | 1 |
| 4  | 0.66316  | C | 1 |
| 22 | 0.573434 | C | 1 |
| 5  | 0.334025 | C | 1 |
| 4  | 0.458394 | C | 1 |
| 13 | 0.487361 | C | 1 |
| 4  | 0.362649 | C | 1 |
| 22 | 0.573434 | C | 1 |
| 4  | 0.66316  | C | 1 |
| 22 | 0.573434 | C | 1 |
| 19 | 0.560562 | C | 1 |
| 4  | 0.080968 | I | 0 |
| 6  | 0.582114 | C | 1 |
| 19 | 0.560562 | C | 1 |
| 6  | 0.582114 | C | 1 |
| 15 | 0.624095 | C | 1 |
| 4  | 0.362649 | C | 1 |
| 8  | 0.338397 | I | 0 |
| 4  | 0.325032 | C | 1 |
| 8  | 0.338397 | I | 0 |
| 18 | 0.506964 | C | 1 |
| 4  | 0.325032 | C | 1 |
| 8  | 0.338397 | I | 0 |
| 8  | 0.338397 | I | 0 |
| 4  | 0.1286   | C | 1 |
| 8  | 0.338397 | I | 0 |
| 8  | 0.338397 | I | 0 |
| 3  | 0.106055 | C | 1 |
| 8  | 0.338397 | I | 0 |
| 4  | 0.325032 | C | 1 |
| 4  | 0.1286   | C | 1 |

|               |   |
|---------------|---|
| 8 0.338397 I  | 0 |
| 4 0.325032 C  | 1 |
| 8 0.338397 I  | 0 |
| 18 0.506964 C | 1 |
| 8 0.338397 I  | 0 |
| 4 0.1286 C    | 1 |
| 18 0.506964 C | 1 |
| 4 0.325032 C  | 1 |
| 18 0.506964 C | 1 |
| 4 0.1286 C    | 1 |
| 4 0.1286 C    | 1 |
| 3 0.106055 C  | 1 |
| 18 0.506964 C | 1 |
| 8 0.338397 I  | 0 |
| 18 0.506964 C | 1 |
| 3 0.106055 C  | 1 |
| 8 0.338397 I  | 0 |
| 18 0.506964 C | 1 |
| 8 0.338397 I  | 0 |
| 4 0.1286 C    | 1 |
| 8 0.338397 I  | 0 |
| 8 0.338397 I  | 0 |
| 18 0.506964 C | 1 |
| 8 0.338397 I  | 0 |
| 8 0.338397 I  | 0 |
| 8 0.338397 I  | 0 |
| 8 0.338397 I  | 0 |
| 22 0.617474 S | 0 |
| 22 0.617474 S | 0 |
| 22 0.617474 S | 0 |
| 22 0.617474 S | 0 |
| 19 0.506576 D | 1 |
| 19 0.506576 D | 1 |
| 19 0.506576 D | 1 |
| 22 0.617474 S | 0 |
| 22 0.617474 S | 0 |
| 19 0.506576 D | 1 |
| 22 0.617474 S | 0 |
| 18 0.923242 C | 1 |
| 18 0.923242 C | 1 |
| 22 0.617474 S | 0 |
| 22 0.617474 S | 0 |
| 22 0.617474 S | 0 |
| 18 0.923242 C | 1 |
| 22 0.617474 S | 0 |
| 22 0.617474 S | 0 |
| 22 0.617474 S | 0 |
| 22 0.617474 S | 0 |
| 12 0.692709 C | 1 |
| 14 0.664666 C | 1 |
| 21 0.667892 C | 1 |
| 12 0.692709 C | 1 |
| 5 0.300083 C  | 1 |
| 8 0.278171 K  | 1 |

|    |          |   |   |
|----|----------|---|---|
| 21 | 0.667892 | C | 1 |
| 21 | 0.667892 | C | 1 |
| 14 | 0.664666 | C | 1 |
| 21 | 0.667892 | C | 1 |
| 5  | 0.300083 | C | 1 |
| 21 | 0.667892 | C | 1 |
| 9  | 0.151364 | C | 1 |
| 14 | 0.664666 | C | 1 |
| 12 | 0.692709 | C | 1 |
| 12 | 0.692709 | C | 1 |
| 12 | 0.692709 | C | 1 |
| 12 | 0.692709 | C | 1 |
| 14 | 0.664666 | C | 1 |
| 12 | 0.692709 | C | 1 |
| 8  | 0.278171 | K | 1 |
| 12 | 0.692709 | C | 1 |
| 9  | 0.151364 | C | 1 |
| 21 | 0.667892 | C | 1 |
| 5  | 0.300083 | C | 1 |
| 12 | 0.692709 | C | 1 |
| 8  | 0.278171 | K | 1 |
| 14 | 0.664666 | C | 1 |
| 8  | 0.278171 | K | 1 |
| 12 | 0.692709 | C | 1 |
| 14 | 0.664666 | C | 1 |
| 12 | 0.692709 | C | 1 |
| 9  | 0.151364 | C | 1 |
| 5  | 0.300083 | C | 1 |
| 8  | 0.278171 | K | 1 |
| 8  | 0.278171 | K | 1 |
| 8  | 0.278171 | K | 1 |
| 9  | 0.151364 | C | 1 |
| 5  | 0.300083 | C | 1 |
| 9  | 0.151364 | C | 1 |
| 12 | 0.692709 | C | 1 |
| 5  | 0.300083 | C | 1 |
| 8  | 0.278171 | K | 1 |
| 21 | 0.667892 | C | 1 |
| 8  | 0.278171 | K | 1 |
| 5  | 0.300083 | C | 1 |
| 8  | 0.278171 | K | 1 |
| 5  | 0.300083 | C | 1 |
| 12 | 0.692709 | C | 1 |
| 21 | 0.667892 | C | 1 |
| 5  | 0.090979 | C | 1 |
| 13 | 0.467067 | C | 1 |
| 13 | 0.467067 | C | 1 |
| 13 | 0.467067 | C | 1 |
| 5  | 0.090979 | C | 1 |
| 13 | 0.467067 | C | 1 |
| 13 | 0.467067 | C | 1 |
| 5  | 0.090979 | C | 1 |
| 13 | 0.467067 | C | 1 |
| 5  | 0.090979 | C | 1 |



|    |          |   |   |
|----|----------|---|---|
| 13 | 0.467067 | C | 1 |
| 5  | 0.090979 | C | 1 |
| 5  | 0.090979 | C | 1 |
| 16 | 0.682942 | C | 1 |
| 16 | 0.682942 | C | 1 |
| 16 | 0.682942 | C | 1 |
| 16 | 0.682942 | C | 1 |
| 16 | 0.682942 | C | 1 |
| 16 | 0.682942 | C | 1 |
| 16 | 0.682942 | C | 1 |
| 16 | 0.682942 | C | 1 |
| 11 | 0.214431 | C | 1 |
| 11 | 0.214431 | C | 1 |
| 11 | 0.214431 | C | 1 |
| 11 | 0.214431 | C | 1 |
| 11 | 0.214431 | C | 1 |
| 11 | 0.214431 | C | 1 |
| 11 | 0.214431 | C | 1 |
| 11 | 0.214431 | C | 1 |
| 11 | 0.214431 | C | 1 |
| 18 | 0.319129 | C | 1 |
| 18 | 0.319129 | C | 1 |
| 18 | 0.319129 | C | 1 |
| 17 | 0.334242 | D | 1 |
| 17 | 0.334242 | D | 1 |
| 5  | 0.603737 | C | 1 |
| 5  | 0.603737 | C | 1 |
| 5  | 0.603737 | C | 1 |
| 5  | 0.603737 | C | 1 |
| 5  | 0.603737 | C | 1 |
| 5  | 0.603737 | C | 1 |
| 5  | 0.603737 | C | 1 |
| 5  | 0.603737 | C | 1 |
| 5  | 0.603737 | C | 1 |
| 5  | 0.603737 | C | 1 |
| 17 | 0.334242 | D | 1 |
| 17 | 0.334242 | D | 1 |
| 5  | 0.603737 | C | 1 |
| 17 | 0.334242 | D | 1 |
| 17 | 0.334242 | D | 1 |
| 15 | 0.72889  | C | 1 |
| 7  | 0.619512 | B | 1 |
| 15 | 0.72889  | C | 1 |
| 7  | 0.619512 | B | 1 |
| 15 | 0.72889  | C | 1 |
| 15 | 0.72889  | C | 1 |
| 15 | 0.72889  | C | 1 |
| 7  | 0.619512 | B | 1 |
| 15 | 0.72889  | C | 1 |
| 15 | 0.72889  | C | 1 |
| 7  | 0.619512 | B | 1 |
| 15 | 0.72889  | C | 1 |
| 7  | 0.619512 | B | 1 |
| 7  | 0.619512 | B | 1 |
| 7  | 0.619512 | B | 1 |
| 7  | 0.619512 | B | 1 |
| 7  | 0.619512 | B | 1 |
| 15 | 0.72889  | C | 1 |

|    |          |   |   |
|----|----------|---|---|
| 15 | 0.72889  | C | 1 |
| 15 | 0.72889  | C | 1 |
| 15 | 0.72889  | C | 1 |
| 15 | 0.72889  | C | 1 |
| 7  | 0.619512 | B | 1 |
| 7  | 0.619512 | B | 1 |
| 7  | 0.619512 | B | 1 |
| 15 | 0.72889  | C | 1 |
| 15 | 0.72889  | C | 1 |
| 5  | 0.436261 | C | 1 |
| 5  | 0.436261 | C | 1 |
| 5  | 0.436261 | C | 1 |
| 5  | 0.436261 | C | 1 |
| 5  | 0.436261 | C | 1 |
| 5  | 0.436261 | C | 1 |
| 5  | 0.436261 | C | 1 |
| 5  | 0.436261 | C | 1 |
| 5  | 0.448054 | C | 1 |
| 20 | 0.381157 | Q | 0 |
| 20 | 0.381157 | Q | 0 |
| 5  | 0.448054 | C | 1 |
| 20 | 0.381157 | Q | 0 |
| 5  | 0.448054 | C | 1 |
| 5  | 0.448054 | C | 1 |
| 5  | 0.448054 | C | 1 |
| 4  | 0.726163 | C | 1 |
| 13 | 0.544134 | B | 1 |
| 4  | 0.726163 | C | 1 |
| 13 | 0.544134 | B | 1 |
| 13 | 0.544134 | B | 1 |
| 4  | 0.726163 | C | 1 |
| 4  | 0.726163 | C | 1 |
| 4  | 0.726163 | C | 1 |
| 4  | 0.726163 | C | 1 |
| 4  | 0.726163 | C | 1 |
| 4  | 0.726163 | C | 1 |
| 4  | 0.726163 | C | 1 |
| 4  | 0.726163 | C | 1 |
| 13 | 0.544134 | B | 1 |
| 4  | 0.726163 | C | 1 |
| 4  | 0.726163 | C | 1 |
| 13 | 0.544134 | B | 1 |
| 4  | 0.726163 | C | 1 |
| 4  | 0.726163 | C | 1 |
| 4  | 0.726163 | C | 1 |
| 4  | 0.726163 | C | 1 |
| 4  | 0.726163 | C | 1 |
| 4  | 0.726163 | C | 1 |
| 4  | 0.726163 | C | 1 |
| 4  | 0.726163 | C | 1 |
| 4  | 0.726163 | C | 1 |
| 14 | 0.40541  | R | 0 |
| 14 | 0.40541  | R | 0 |
| 14 | 0.40541  | R | 0 |
| 19 | 0.487941 | C | 1 |
| 19 | 0.487941 | C | 1 |
| 19 | 0.487941 | C | 1 |

|    |          |   |   |
|----|----------|---|---|
| 19 | 0.487941 | C | 1 |
| 14 | 0.40541  | R | 0 |
| 14 | 0.40541  | R | 0 |
| 19 | 0.487941 | C | 1 |
| 14 | 0.40541  | R | 0 |
| 19 | 0.487941 | C | 1 |
| 19 | 0.487941 | C | 1 |
| 19 | 0.487941 | C | 1 |
| 19 | 0.487941 | C | 1 |
| 2  | 0.595094 | C | 1 |
| 18 | 0.443599 | C | 1 |
| 6  | 0.468883 | C | 1 |
| 5  | 0.286437 | C | 1 |
| 5  | 0.286437 | C | 1 |
| 18 | 0.443599 | C | 1 |
| 7  | 0.189622 | C | 1 |
| 6  | 0.468883 | C | 1 |
| 2  | 0.257639 | C | 1 |
| 2  | 0.501204 | N | 0 |
| 6  | 0.468883 | C | 1 |
| 18 | 0.443599 | C | 1 |
| 2  | 0.501204 | N | 0 |
| 7  | 0.189622 | C | 1 |
| 7  | 0.189622 | C | 1 |
| 7  | 0.189622 | C | 1 |
| 6  | 0.468883 | C | 1 |
| 2  | 0.257639 | C | 1 |
| 6  | 0.468883 | C | 1 |
| 2  | 0.501204 | N | 0 |
| 2  | 0.501204 | N | 0 |
| 5  | 0.426415 | C | 1 |
| 4  | 0.317989 | C | 1 |
| 18 | 0.443599 | C | 1 |
| 2  | 0.257639 | C | 1 |
| 5  | 0.426415 | C | 1 |
| 2  | 0.595094 | C | 1 |
| 5  | 0.286437 | C | 1 |
| 18 | 0.443599 | C | 1 |
| 5  | 0.426415 | C | 1 |
| 6  | 0.468883 | C | 1 |
| 2  | 0.501204 | N | 0 |
| 18 | 0.443599 | C | 1 |
| 2  | 0.595094 | C | 1 |
| 4  | 0.317989 | C | 1 |
| 2  | 0.257639 | C | 1 |
| 2  | 0.595094 | C | 1 |
| 5  | 0.426415 | C | 1 |
| 7  | 0.189622 | C | 1 |
| 4  | 0.317989 | C | 1 |
| 6  | 0.468883 | C | 1 |
| 2  | 0.501204 | N | 0 |
| 5  | 0.286437 | C | 1 |
| 2  | 0.257639 | C | 1 |
| 6  | 0.468883 | C | 1 |

|    |          |   |   |
|----|----------|---|---|
| 4  | 0.317989 | C | 1 |
| 4  | 0.317989 | C | 1 |
| 5  | 0.426415 | C | 1 |
| 2  | 0.595094 | C | 1 |
| 5  | 0.286437 | C | 1 |
| 5  | 0.286437 | C | 1 |
| 5  | 0.286437 | C | 1 |
| 5  | 0.426415 | C | 1 |
| 18 | 0.443599 | C | 1 |
| 1  | 0.19958  | C | 1 |
| 6  | 0.468883 | C | 1 |
| 2  | 0.501204 | N | 0 |
| 18 | 0.443599 | C | 1 |
| 7  | 0.189622 | C | 1 |
| 5  | 0.426415 | C | 1 |
| 1  | 0.19958  | C | 1 |
| 5  | 0.426415 | C | 1 |
| 5  | 0.286437 | C | 1 |
| 2  | 0.595094 | C | 1 |
| 5  | 0.426415 | C | 1 |
| 6  | 0.274047 | C | 1 |
| 2  | 0.595094 | C | 1 |
| 4  | 0.317989 | C | 1 |
| 2  | 0.501204 | N | 0 |
| 6  | 0.468883 | C | 1 |
| 1  | 0.236751 | C | 1 |
| 6  | 0.274047 | C | 1 |
| 2  | 0.595094 | C | 1 |
| 5  | 0.426415 | C | 1 |
| 6  | 0.468883 | C | 1 |
| 4  | 0.317989 | C | 1 |
| 6  | 0.468883 | C | 1 |
| 18 | 0.443599 | C | 1 |
| 1  | 0.236751 | C | 1 |
| 6  | 0.274047 | C | 1 |
| 4  | 0.317989 | C | 1 |
| 2  | 0.257639 | C | 1 |
| 1  | 0.19958  | C | 1 |
| 6  | 0.468883 | C | 1 |
| 2  | 0.257639 | C | 1 |
| 2  | 0.257639 | C | 1 |
| 4  | 0.317989 | C | 1 |
| 1  | 0.236751 | C | 1 |
| 2  | 0.257639 | C | 1 |
| 4  | 0.317989 | C | 1 |
| 1  | 0.19958  | C | 1 |
| 6  | 0.468883 | C | 1 |
| 16 | 0.548808 | C | 1 |
| 16 | 0.548808 | C | 1 |
| 1  | 0.275184 | C | 1 |
| 1  | 0.275184 | C | 1 |
| 6  | 0.28573  | C | 1 |
| 6  | 0.28573  | C | 1 |
| 6  | 0.28573  | C | 1 |

|    |          |   |   |
|----|----------|---|---|
| 16 | 0.548808 | C | 1 |
| 4  | 0.210058 | C | 1 |
| 4  | 0.210058 | C | 1 |
| 16 | 0.548808 | C | 1 |
| 12 | 0.479715 | I | 0 |
| 12 | 0.479715 | I | 0 |
| 4  | 0.210058 | C | 1 |
| 16 | 0.548808 | C | 1 |
| 16 | 0.548808 | C | 1 |
| 16 | 0.548808 | C | 1 |
| 4  | 0.210058 | C | 1 |
| 4  | 0.210058 | C | 1 |
| 6  | 0.28573  | C | 1 |
| 1  | 0.275184 | C | 1 |
| 4  | 0.210058 | C | 1 |
| 1  | 0.275184 | C | 1 |
| 6  | 0.28573  | C | 1 |
| 16 | 0.548808 | C | 1 |
| 16 | 0.548808 | C | 1 |
| 1  | 0.275184 | C | 1 |
| 6  | 0.28573  | C | 1 |
| 12 | 0.479715 | I | 0 |
| 1  | 0.275184 | C | 1 |
| 1  | 0.275184 | C | 1 |
| 4  | 0.210058 | C | 1 |
| 12 | 0.479715 | I | 0 |
| 6  | 0.28573  | C | 1 |
| 4  | 0.210058 | C | 1 |
| 12 | 0.479715 | I | 0 |
| 16 | 0.548808 | C | 1 |
| 12 | 0.500541 | C | 1 |
| 12 | 0.500541 | C | 1 |
| 6  | 0.402458 | C | 1 |
| 21 | 0.370965 | C | 1 |
| 8  | 0.387147 | C | 1 |
| 21 | 0.370965 | C | 1 |
| 12 | 0.500541 | C | 1 |
| 8  | 0.387147 | C | 1 |
| 12 | 0.500541 | C | 1 |
| 8  | 0.387147 | C | 1 |
| 4  | 0.583264 | C | 1 |
| 12 | 0.500541 | C | 1 |
| 1  | 0.613931 | C | 1 |
| 21 | 0.370965 | C | 1 |
| 8  | 0.387147 | C | 1 |
| 1  | 0.613931 | C | 1 |
| 5  | 0.392125 | C | 1 |
| 8  | 0.387147 | C | 1 |
| 12 | 0.500541 | C | 1 |
| 8  | 0.387147 | C | 1 |
| 5  | 0.392125 | C | 1 |
| 1  | 0.613931 | C | 1 |
| 8  | 0.387147 | C | 1 |
| 2  | 0.176376 | I | 0 |

|    |          |   |   |
|----|----------|---|---|
| 1  | 0.613931 | C | 1 |
| 1  | 0.613931 | C | 1 |
| 8  | 0.387147 | C | 1 |
| 8  | 0.387147 | C | 1 |
| 8  | 0.387147 | C | 1 |
| 2  | 0.176376 | I | 0 |
| 8  | 0.387147 | C | 1 |
| 8  | 0.387147 | C | 1 |
| 12 | 0.500541 | C | 1 |
| 8  | 0.387147 | C | 1 |
| 1  | 0.613931 | C | 1 |
| 8  | 0.387147 | C | 1 |
| 12 | 0.500541 | C | 1 |
| 8  | 0.387147 | C | 1 |
| 8  | 0.387147 | C | 1 |
| 8  | 0.387147 | C | 1 |
| 1  | 0.613931 | C | 1 |
| 21 | 0.370965 | C | 1 |
| 6  | 0.402458 | C | 1 |
| 5  | 0.392125 | C | 1 |
| 4  | 0.583264 | C | 1 |
| 12 | 0.500541 | C | 1 |
| 6  | 0.402458 | C | 1 |
| 1  | 0.613931 | C | 1 |
| 8  | 0.387147 | C | 1 |
| 8  | 0.387147 | C | 1 |
| 1  | 0.613931 | C | 1 |
| 5  | 0.392125 | C | 1 |
| 4  | 0.583264 | C | 1 |
| 1  | 0.613931 | C | 1 |
| 4  | 0.583264 | C | 1 |
| 6  | 0.402458 | C | 1 |
| 21 | 0.370965 | C | 1 |
| 2  | 0.176376 | I | 0 |
| 4  | 0.583264 | C | 1 |
| 21 | 0.370965 | C | 1 |
| 4  | 0.583264 | C | 1 |
| 1  | 0.613931 | C | 1 |
| 8  | 0.387147 | C | 1 |
| 2  | 0.176376 | I | 0 |
| 6  | 0.402458 | C | 1 |
| 1  | 0.613931 | C | 1 |
| 8  | 0.387147 | C | 1 |
| 6  | 0.402458 | C | 1 |
| 8  | 0.387147 | C | 1 |
| 21 | 0.370965 | C | 1 |
| 5  | 0.392125 | C | 1 |
| 6  | 0.354179 | C | 1 |
| 17 | 0.214685 | C | 1 |
| 17 | 0.214685 | C | 1 |
| 6  | 0.354179 | C | 1 |
| 5  | 0.380996 | C | 1 |
| 5  | 0.380996 | C | 1 |
| 6  | 0.354179 | C | 1 |

|    |          |   |   |
|----|----------|---|---|
| 6  | 0.354179 | C | 1 |
| 5  | 0.380996 | C | 1 |
| 5  | 0.380996 | C | 1 |
| 5  | 0.380996 | C | 1 |
| 6  | 0.354179 | C | 1 |
| 5  | 0.380996 | C | 1 |
| 5  | 0.380996 | C | 1 |
| 5  | 0.380996 | C | 1 |
| 17 | 0.214685 | C | 1 |
| 5  | 0.380996 | C | 1 |
| 6  | 0.354179 | C | 1 |
| 5  | 0.380996 | C | 1 |
| 17 | 0.214685 | C | 1 |
| 17 | 0.214685 | C | 1 |
| 5  | 0.380996 | C | 1 |
| 6  | 0.354179 | C | 1 |
| 17 | 0.214685 | C | 1 |
| 5  | 0.380996 | C | 1 |
| 5  | 0.380996 | C | 1 |
| 6  | 0.354179 | C | 1 |
| 5  | 0.380996 | C | 1 |
| 17 | 0.214685 | C | 1 |
| 6  | 0.354179 | C | 1 |
| 6  | 0.354179 | C | 1 |
| 5  | 0.380996 | C | 1 |
| 17 | 0.214685 | C | 1 |
| 16 | 0.681431 | C | 1 |
| 16 | 0.681431 | C | 1 |
| 16 | 0.681431 | C | 1 |
| 16 | 0.681431 | C | 1 |
| 16 | 0.681431 | C | 1 |
| 16 | 0.681431 | C | 1 |
| 16 | 0.681431 | C | 1 |
| 16 | 0.681431 | C | 1 |
| 16 | 0.681431 | C | 1 |
| 5  | 0.241513 | C | 1 |
| 5  | 0.241513 | C | 1 |
| 5  | 0.241513 | C | 1 |
| 5  | 0.241513 | C | 1 |
| 5  | 0.241513 | C | 1 |
| 5  | 0.241513 | C | 1 |
| 16 | 0.911642 | G | 0 |
| 16 | 0.911642 | G | 0 |
| 5  | 0.241513 | C | 1 |
| 5  | 0.241513 | C | 1 |
| 16 | 0.911642 | G | 0 |
| 4  | 0.159785 | C | 1 |
| 4  | 0.159785 | C | 1 |
| 4  | 0.159785 | C | 1 |
| 4  | 0.159785 | C | 1 |
| 4  | 0.159785 | C | 1 |
| 1  | 0.242742 | A | 0 |
| 1  | 0.242742 | A | 0 |
| 1  | 0.242742 | A | 0 |
| 1  | 0.242742 | A | 0 |

|    |          |   |   |
|----|----------|---|---|
| 1  | 0.242742 | A | 0 |
| 1  | 0.242742 | A | 0 |
| 1  | 0.242742 | A | 0 |
| 1  | 0.242742 | A | 0 |
| 1  | 0.242742 | A | 0 |
| 1  | 0.242742 | A | 0 |
| 1  | 0.242742 | A | 0 |
| 1  | 0.242742 | A | 0 |
| 1  | 0.242742 | A | 0 |
| 1  | 0.242742 | A | 0 |
| 1  | 0.242742 | A | 0 |
| 1  | 0.242742 | A | 0 |
| 1  | 0.242742 | A | 0 |
| 1  | 0.242742 | A | 0 |
| 1  | 0.242742 | A | 0 |
| 1  | 0.242742 | A | 0 |
| 20 | 0.319987 | C | 1 |
| 20 | 0.319987 | C | 1 |
| 20 | 0.319987 | C | 1 |
| 20 | 0.319987 | C | 1 |
| 20 | 0.319987 | C | 1 |
| 20 | 0.319987 | C | 1 |
| 20 | 0.319987 | C | 1 |
| 20 | 0.319987 | C | 1 |
| 20 | 0.319987 | C | 1 |
| 20 | 0.319987 | C | 1 |
| 20 | 0.319987 | C | 1 |
| 5  | 0.442447 | C | 1 |
| 3  | 0.595683 | C | 1 |
| 14 | 0.505501 | C | 1 |
| 3  | 0.595683 | C | 1 |
| 3  | 0.595683 | C | 1 |
| 23 | 0.179453 | C | 1 |
| 3  | 0.595683 | C | 1 |
| 1  | 0.523338 | C | 1 |
| 7  | 0.185856 | C | 1 |
| 17 | 0.720627 | C | 1 |
| 5  | 0.329898 | C | 1 |
| 5  | 0.425766 | C | 1 |
| 14 | 0.505501 | C | 1 |
| 16 | 0.497365 | C | 1 |
| 10 | 0.306174 | C | 1 |
| 4  | 0.380419 | C | 1 |
| 10 | 0.306174 | C | 1 |
| 7  | 0.304001 | C | 1 |
| 14 | 0.505501 | C | 1 |
| 14 | 0.505501 | C | 1 |
| 3  | 0.595683 | C | 1 |
| 4  | 0.380419 | C | 1 |
| 10 | 0.306174 | C | 1 |
| 17 | 0.720627 | C | 1 |
| 16 | 0.429389 | N | 0 |
| 3  | 0.595683 | C | 1 |
| 4  | 0.553697 | G | 0 |
| 3  | 0.595683 | C | 1 |
| 3  | 0.595683 | C | 1 |
| 14 | 0.505501 | C | 1 |
| 10 | 0.390069 | C | 1 |



|    |          |   |   |
|----|----------|---|---|
| 5  | 0.425766 | C | 1 |
| 10 | 0.306174 | C | 1 |
| 17 | 0.720627 | C | 1 |
| 3  | 0.595683 | C | 1 |
| 6  | 0.485358 | C | 1 |
| 10 | 0.306174 | C | 1 |
| 3  | 0.595683 | C | 1 |
| 16 | 0.429389 | N | 0 |
| 16 | 0.497365 | C | 1 |
| 16 | 0.497365 | C | 1 |
| 17 | 0.720627 | C | 1 |
| 6  | 0.249812 | C | 1 |
| 2  | 0.256234 | C | 1 |
| 22 | 0.367516 | C | 1 |
| 7  | 0.185856 | C | 1 |
| 4  | 0.380419 | C | 1 |
| 2  | 0.50967  | C | 1 |
| 4  | 0.186871 | C | 1 |
| 2  | 0.256234 | C | 1 |
| 3  | 0.595683 | C | 1 |
| 10 | 0.306174 | C | 1 |
| 14 | 0.505501 | C | 1 |
| 5  | 0.329898 | C | 1 |
| 5  | 0.425766 | C | 1 |
| 14 | 0.505501 | C | 1 |
| 22 | 0.367516 | C | 1 |
| 14 | 0.505501 | C | 1 |
| 5  | 0.425766 | C | 1 |
| 17 | 0.720627 | C | 1 |
| 3  | 0.595683 | C | 1 |
| 14 | 0.505501 | C | 1 |
| 3  | 0.595683 | C | 1 |
| 4  | 0.380419 | C | 1 |
| 7  | 0.185856 | C | 1 |
| 5  | 0.425766 | C | 1 |
| 3  | 0.595683 | C | 1 |
| 3  | 0.595683 | C | 1 |
| 5  | 0.329898 | C | 1 |
| 8  | 0.654337 | C | 1 |
| 10 | 0.390069 | C | 1 |
| 17 | 0.720627 | C | 1 |
| 17 | 0.720627 | C | 1 |
| 1  | 0.390178 | F | 0 |
| 7  | 0.304001 | C | 1 |
| 1  | 0.090214 | C | 1 |
| 1  | 0.523338 | C | 1 |
| 8  | 0.654337 | C | 1 |
| 7  | 0.304001 | C | 1 |
| 7  | 0.185856 | C | 1 |
| 1  | 0.390178 | F | 0 |
| 6  | 0.485358 | C | 1 |
| 10 | 0.390069 | C | 1 |
| 5  | 0.425766 | C | 1 |
| 3  | 0.595683 | C | 1 |

|    |          |   |   |
|----|----------|---|---|
| 2  | 0.471046 | G | 0 |
| 23 | 0.179453 | C | 1 |
| 1  | 0.523338 | C | 1 |
| 1  | 0.523338 | C | 1 |
| 3  | 0.595683 | C | 1 |
| 14 | 0.505501 | C | 1 |
| 3  | 0.595683 | C | 1 |
| 17 | 0.720627 | C | 1 |
| 17 | 0.720627 | C | 1 |
| 8  | 0.654337 | C | 1 |
| 14 | 0.505501 | C | 1 |
| 16 | 0.429389 | N | 0 |
| 1  | 0.523338 | C | 1 |
| 3  | 0.595683 | C | 1 |
| 16 | 0.497365 | C | 1 |
| 3  | 0.595683 | C | 1 |
| 2  | 0.50967  | C | 1 |
| 4  | 0.186871 | C | 1 |
| 14 | 0.505501 | C | 1 |
| 3  | 0.595683 | C | 1 |
| 2  | 0.50967  | C | 1 |
| 10 | 0.306174 | C | 1 |
| 16 | 0.429389 | N | 0 |
| 17 | 0.720627 | C | 1 |
| 16 | 0.497365 | C | 1 |
| 22 | 0.367516 | C | 1 |
| 1  | 0.523338 | C | 1 |
| 5  | 0.329898 | C | 1 |
| 1  | 0.090214 | C | 1 |
| 14 | 0.505501 | C | 1 |
| 10 | 0.390069 | C | 1 |
| 2  | 0.256234 | C | 1 |
| 2  | 0.256234 | C | 1 |
| 5  | 0.425766 | C | 1 |
| 2  | 0.50967  | C | 1 |
| 2  | 0.50967  | C | 1 |
| 23 | 0.179453 | C | 1 |
| 23 | 0.179453 | C | 1 |
| 7  | 0.304001 | C | 1 |
| 2  | 0.256234 | C | 1 |
| 10 | 0.306174 | C | 1 |
| 10 | 0.306174 | C | 1 |
| 1  | 0.523338 | C | 1 |
| 16 | 0.429389 | N | 0 |
| 14 | 0.505501 | C | 1 |
| 17 | 0.720627 | C | 1 |
| 2  | 0.50967  | C | 1 |
| 2  | 0.471046 | G | 0 |
| 5  | 0.442447 | C | 1 |
| 16 | 0.497365 | C | 1 |
| 6  | 0.249812 | C | 1 |
| 22 | 0.367516 | C | 1 |
| 3  | 0.595683 | C | 1 |
| 8  | 0.654337 | C | 1 |

|    |          |   |   |
|----|----------|---|---|
| 4  | 0.186871 | C | 1 |
| 1  | 0.090214 | C | 1 |
| 22 | 0.367516 | C | 1 |
| 6  | 0.485358 | C | 1 |
| 1  | 0.523338 | C | 1 |
| 22 | 0.367516 | C | 1 |
| 3  | 0.595683 | C | 1 |
| 1  | 0.090214 | C | 1 |
| 3  | 0.595683 | C | 1 |
| 4  | 0.380419 | C | 1 |
| 6  | 0.249812 | C | 1 |
| 7  | 0.185856 | C | 1 |
| 3  | 0.595683 | C | 1 |
| 10 | 0.306174 | C | 1 |
| 4  | 0.380419 | C | 1 |
| 4  | 0.380419 | C | 1 |
| 5  | 0.329898 | C | 1 |
| 3  | 0.595683 | C | 1 |
| 5  | 0.442447 | C | 1 |
| 7  | 0.185856 | C | 1 |
| 3  | 0.595683 | C | 1 |
| 4  | 0.553697 | G | 0 |
| 10 | 0.390069 | C | 1 |
| 17 | 0.720627 | C | 1 |
| 23 | 0.179453 | C | 1 |
| 3  | 0.595683 | C | 1 |
| 5  | 0.442447 | C | 1 |
| 6  | 0.485358 | C | 1 |
| 16 | 0.429389 | N | 0 |
| 2  | 0.50967  | C | 1 |
| 3  | 0.595683 | C | 1 |
| 4  | 0.186871 | C | 1 |
| 1  | 0.390178 | F | 0 |
| 3  | 0.595683 | C | 1 |
| 16 | 0.497365 | C | 1 |
| 4  | 0.553697 | G | 0 |
| 4  | 0.553697 | G | 0 |
| 6  | 0.249812 | C | 1 |
| 16 | 0.429389 | N | 0 |
| 3  | 0.595683 | C | 1 |
| 7  | 0.185856 | C | 1 |
| 3  | 0.595683 | C | 1 |
| 10 | 0.306174 | C | 1 |
| 10 | 0.390069 | C | 1 |
| 14 | 0.505501 | C | 1 |
| 16 | 0.497365 | C | 1 |
| 16 | 0.497365 | C | 1 |
| 16 | 0.497365 | C | 1 |
| 4  | 0.380419 | C | 1 |
| 16 | 0.497365 | C | 1 |
| 4  | 0.553697 | G | 0 |
| 4  | 0.186871 | C | 1 |
| 17 | 0.720627 | C | 1 |
| 7  | 0.304001 | C | 1 |

|    |          |   |   |
|----|----------|---|---|
| 5  | 0.442447 | C | 1 |
| 16 | 0.429389 | N | 0 |
| 10 | 0.306174 | C | 1 |
| 17 | 0.720627 | C | 1 |
| 6  | 0.249812 | C | 1 |
| 4  | 0.380419 | C | 1 |
| 5  | 0.329898 | C | 1 |
| 6  | 0.249812 | C | 1 |
| 3  | 0.595683 | C | 1 |
| 14 | 0.505501 | C | 1 |
| 8  | 0.654337 | C | 1 |
| 5  | 0.329898 | C | 1 |
| 10 | 0.390069 | C | 1 |
| 6  | 0.249812 | C | 1 |
| 5  | 0.329898 | C | 1 |
| 10 | 0.306174 | C | 1 |
| 3  | 0.595683 | C | 1 |
| 5  | 0.329898 | C | 1 |
| 14 | 0.505501 | C | 1 |
| 5  | 0.442447 | C | 1 |
| 23 | 0.179453 | C | 1 |
| 16 | 0.497365 | C | 1 |
| 3  | 0.595683 | C | 1 |
| 7  | 0.185856 | C | 1 |
| 8  | 0.654337 | C | 1 |
| 17 | 0.720627 | C | 1 |
| 3  | 0.595683 | C | 1 |
| 2  | 0.50967  | C | 1 |
| 14 | 0.505501 | C | 1 |
| 3  | 0.595683 | C | 1 |
| 3  | 0.595683 | C | 1 |
| 10 | 0.390069 | C | 1 |
| 17 | 0.720627 | C | 1 |
| 4  | 0.186871 | C | 1 |
| 4  | 0.186871 | C | 1 |
| 3  | 0.595683 | C | 1 |
| 3  | 0.595683 | C | 1 |
| 7  | 0.304001 | C | 1 |
| 6  | 0.485358 | C | 1 |
| 5  | 0.442447 | C | 1 |
| 2  | 0.50967  | C | 1 |
| 17 | 0.720627 | C | 1 |
| 3  | 0.595683 | C | 1 |
| 2  | 0.471046 | G | 0 |
| 10 | 0.390069 | C | 1 |
| 17 | 0.720627 | C | 1 |
| 4  | 0.186871 | C | 1 |
| 16 | 0.497365 | C | 1 |
| 14 | 0.505501 | C | 1 |
| 16 | 0.429389 | N | 0 |
| 3  | 0.595683 | C | 1 |
| 2  | 0.256234 | C | 1 |
| 23 | 0.179453 | C | 1 |
| 3  | 0.595683 | C | 1 |

|    |          |   |   |
|----|----------|---|---|
| 3  | 0.595683 | C | 1 |
| 10 | 0.306174 | C | 1 |
| 2  | 0.50967  | C | 1 |
| 10 | 0.390069 | C | 1 |
| 3  | 0.595683 | C | 1 |
| 3  | 0.595683 | C | 1 |
| 16 | 0.497365 | C | 1 |
| 2  | 0.256234 | C | 1 |
| 5  | 0.329898 | C | 1 |
| 7  | 0.304001 | C | 1 |
| 1  | 0.090214 | C | 1 |
| 3  | 0.595683 | C | 1 |
| 4  | 0.380419 | C | 1 |
| 3  | 0.595683 | C | 1 |
| 1  | 0.390178 | F | 0 |
| 10 | 0.306174 | C | 1 |
| 7  | 0.185856 | C | 1 |
| 16 | 0.429389 | N | 0 |
| 5  | 0.442447 | C | 1 |
| 22 | 0.367516 | C | 1 |
| 17 | 0.720627 | C | 1 |
| 16 | 0.429389 | N | 0 |
| 5  | 0.425766 | C | 1 |
| 4  | 0.553697 | G | 0 |
| 5  | 0.442447 | C | 1 |
| 10 | 0.306174 | C | 1 |
| 1  | 0.390178 | F | 0 |
| 3  | 0.595683 | C | 1 |
| 5  | 0.329898 | C | 1 |
| 17 | 0.489227 | C | 1 |
| 17 | 0.489227 | C | 1 |
| 17 | 0.489227 | C | 1 |
| 17 | 0.489227 | C | 1 |
| 13 | 0.519146 | C | 1 |
| 13 | 0.519146 | C | 1 |
| 13 | 0.519146 | C | 1 |
| 12 | 0.326248 | C | 1 |
| 18 | 0.194944 | C | 1 |
| 19 | 0.651362 | C | 1 |
| 13 | 0.519146 | C | 1 |
| 13 | 0.519146 | C | 1 |
| 18 | 0.194944 | C | 1 |
| 12 | 0.326248 | C | 1 |
| 12 | 0.326248 | C | 1 |
| 18 | 0.194944 | C | 1 |
| 12 | 0.326248 | C | 1 |
| 12 | 0.326248 | C | 1 |
| 13 | 0.519146 | C | 1 |
| 13 | 0.519146 | C | 1 |
| 15 | 0.923242 | C | 1 |
| 5  | 0.48701  | C | 1 |
| 5  | 0.48701  | C | 1 |
| 5  | 0.48701  | C | 1 |
| 13 | 0.519146 | C | 1 |

|    |          |   |   |
|----|----------|---|---|
| 13 | 0.519146 | C | 1 |
| 1  | 0.144105 | C | 1 |
| 15 | 0.923242 | C | 1 |
| 13 | 0.519146 | C | 1 |
| 12 | 0.326248 | C | 1 |
| 13 | 0.519146 | C | 1 |
| 12 | 0.326248 | C | 1 |
| 13 | 0.519146 | C | 1 |
| 13 | 0.519146 | C | 1 |
| 6  | 0.530712 | N | 0 |
| 5  | 0.48701  | C | 1 |
| 13 | 0.519146 | C | 1 |
| 6  | 0.405616 | C | 1 |
| 5  | 0.48701  | C | 1 |
| 1  | 0.084208 | C | 1 |
| 6  | 0.405616 | C | 1 |
| 13 | 0.519146 | C | 1 |
| 13 | 0.519146 | C | 1 |
| 15 | 0.923242 | C | 1 |
| 12 | 0.326248 | C | 1 |
| 1  | 0.084208 | C | 1 |
| 12 | 0.326248 | C | 1 |
| 15 | 0.923242 | C | 1 |
| 13 | 0.519146 | C | 1 |
| 12 | 0.326248 | C | 1 |
| 1  | 0.144105 | C | 1 |
| 5  | 0.48701  | C | 1 |
| 6  | 0.530712 | N | 0 |
| 12 | 0.326248 | C | 1 |
| 12 | 0.326248 | C | 1 |
| 15 | 0.923242 | C | 1 |
| 13 | 0.519146 | C | 1 |
| 12 | 0.326248 | C | 1 |
| 13 | 0.519146 | C | 1 |
| 6  | 0.405616 | C | 1 |
| 12 | 0.326248 | C | 1 |
| 12 | 0.326248 | C | 1 |
| 6  | 0.530712 | N | 0 |
| 15 | 0.923242 | C | 1 |
| 12 | 0.326248 | C | 1 |
| 15 | 0.923242 | C | 1 |
| 5  | 0.48701  | C | 1 |
| 5  | 0.48701  | C | 1 |
| 19 | 0.651362 | C | 1 |
| 6  | 0.530712 | N | 0 |
| 15 | 0.923242 | C | 1 |
| 12 | 0.326248 | C | 1 |
| 13 | 0.519146 | C | 1 |
| 15 | 0.923242 | C | 1 |
| 12 | 0.326248 | C | 1 |
| 13 | 0.519146 | C | 1 |
| 6  | 0.530712 | N | 0 |
| 15 | 0.923242 | C | 1 |
| 6  | 0.530712 | N | 0 |

|    |          |   |   |
|----|----------|---|---|
| 15 | 0.923242 | C | 1 |
| 13 | 0.519146 | C | 1 |
| 13 | 0.519146 | C | 1 |
| 5  | 0.48701  | C | 1 |
| 6  | 0.405616 | C | 1 |
| 18 | 0.194944 | C | 1 |
| 6  | 0.530712 | N | 0 |
| 19 | 0.651362 | C | 1 |
| 15 | 0.923242 | C | 1 |
| 12 | 0.326248 | C | 1 |
| 6  | 0.405616 | C | 1 |
| 15 | 0.923242 | C | 1 |
| 13 | 0.519146 | C | 1 |
| 13 | 0.519146 | C | 1 |
| 13 | 0.519146 | C | 1 |
| 15 | 0.923242 | C | 1 |
| 12 | 0.326248 | C | 1 |
| 12 | 0.326248 | C | 1 |
| 12 | 0.326248 | C | 1 |
| 13 | 0.519146 | C | 1 |
| 13 | 0.519146 | C | 1 |
| 12 | 0.326248 | C | 1 |
| 19 | 0.651362 | C | 1 |
| 12 | 0.326248 | C | 1 |
| 6  | 0.530712 | N | 0 |
| 5  | 0.48701  | C | 1 |
| 1  | 0.084208 | C | 1 |
| 18 | 0.194944 | C | 1 |
| 12 | 0.326248 | C | 1 |
| 15 | 0.923242 | C | 1 |
| 12 | 0.326248 | C | 1 |
| 13 | 0.519146 | C | 1 |
| 12 | 0.326248 | C | 1 |
| 1  | 0.144105 | C | 1 |
| 12 | 0.326248 | C | 1 |
| 19 | 0.651362 | C | 1 |
| 19 | 0.651362 | C | 1 |
| 12 | 0.326248 | C | 1 |
| 12 | 0.326248 | C | 1 |
| 12 | 0.326248 | C | 1 |
| 12 | 0.326248 | C | 1 |
| 18 | 0.194944 | C | 1 |
| 12 | 0.326248 | C | 1 |
| 13 | 0.519146 | C | 1 |
| 12 | 0.326248 | C | 1 |
| 15 | 0.923242 | C | 1 |
| 13 | 0.519146 | C | 1 |
| 15 | 0.923242 | C | 1 |
| 13 | 0.519146 | C | 1 |
| 19 | 0.651362 | C | 1 |
| 19 | 0.651362 | C | 1 |
| 12 | 0.326248 | C | 1 |
| 6  | 0.530712 | N | 0 |
| 14 | 0.64597  | E | 1 |

|    |          |   |   |
|----|----------|---|---|
| 14 | 0.64597  | E | 1 |
| 1  | 0.303236 | C | 1 |
| 14 | 0.64597  | E | 1 |
| 1  | 0.303236 | C | 1 |
| 14 | 0.64597  | E | 1 |
| 14 | 0.64597  | E | 1 |
| 14 | 0.64597  | E | 1 |
| 1  | 0.303236 | C | 1 |
| 14 | 0.64597  | E | 1 |
| 14 | 0.64597  | E | 1 |
| 14 | 0.64597  | E | 1 |
| 1  | 0.303236 | C | 1 |
| 14 | 0.64597  | E | 1 |
| 14 | 0.64597  | E | 1 |
| 14 | 0.64597  | E | 1 |
| 14 | 0.64597  | E | 1 |
| 14 | 0.64597  | E | 1 |
| 14 | 0.64597  | E | 1 |
| 1  | 0.303236 | C | 1 |
| 14 | 0.64597  | E | 1 |
| 1  | 0.303236 | C | 1 |
| 15 | 0.438631 | B | 1 |
| 15 | 0.438631 | B | 1 |
| 15 | 0.438631 | B | 1 |
| 15 | 0.438631 | B | 1 |
| 15 | 0.438631 | B | 1 |
| 18 | 0.551894 | C | 1 |
| 5  | 0.408347 | C | 1 |
| 1  | 0.124609 | R | 0 |
| 1  | 0.124609 | R | 0 |
| 6  | 0.237951 | B | 1 |
| 17 | 0.241178 | C | 1 |
| 18 | 0.551894 | C | 1 |
| 14 | 0.248714 | C | 1 |
| 2  | 0.60224  | C | 1 |
| 5  | 0.408347 | C | 1 |
| 14 | 0.248714 | C | 1 |
| 18 | 0.551894 | C | 1 |
| 5  | 0.408347 | C | 1 |
| 6  | 0.237951 | B | 1 |
| 2  | 0.60224  | C | 1 |
| 14 | 0.248714 | C | 1 |
| 14 | 0.248714 | C | 1 |
| 14 | 0.248714 | C | 1 |
| 19 | 0.392324 | A | 0 |
| 2  | 0.60224  | C | 1 |
| 2  | 0.60224  | C | 1 |
| 17 | 0.241178 | C | 1 |
| 2  | 0.60224  | C | 1 |
| 18 | 0.551894 | C | 1 |
| 5  | 0.408347 | C | 1 |



|    |          |   |   |
|----|----------|---|---|
| 14 | 0.248714 | C | 1 |
| 2  | 0.60224  | C | 1 |
| 5  | 0.366341 | C | 1 |
| 19 | 0.392324 | A | 0 |
| 5  | 0.408347 | C | 1 |
| 17 | 0.241178 | C | 1 |
| 18 | 0.551894 | C | 1 |
| 18 | 0.551894 | C | 1 |
| 18 | 0.551894 | C | 1 |
| 18 | 0.551894 | C | 1 |
| 18 | 0.551894 | C | 1 |
| 6  | 0.237951 | B | 1 |
| 18 | 0.551894 | C | 1 |
| 14 | 0.248714 | C | 1 |
| 6  | 0.237951 | B | 1 |
| 6  | 0.237951 | B | 1 |
| 6  | 0.237951 | B | 1 |
| 5  | 0.366341 | C | 1 |
| 14 | 0.248714 | C | 1 |
| 5  | 0.366341 | C | 1 |
| 2  | 0.60224  | C | 1 |
| 18 | 0.551894 | C | 1 |
| 5  | 0.408347 | C | 1 |
| 18 | 0.551894 | C | 1 |
| 6  | 0.237951 | B | 1 |
| 1  | 0.124609 | R | 0 |
| 2  | 0.60224  | C | 1 |
| 5  | 0.408347 | C | 1 |
| 18 | 0.551894 | C | 1 |
| 6  | 0.237951 | B | 1 |
| 2  | 0.60224  | C | 1 |
| 19 | 0.392324 | A | 0 |
| 5  | 0.408347 | C | 1 |
| 5  | 0.408347 | C | 1 |
| 6  | 0.237951 | B | 1 |
| 19 | 0.372757 | C | 1 |
| 19 | 0.372757 | C | 1 |
| 19 | 0.372757 | C | 1 |
| 15 | 0.664584 | C | 1 |
| 19 | 0.372757 | C | 1 |
| 19 | 0.372757 | C | 1 |
| 19 | 0.372757 | C | 1 |
| 19 | 0.372757 | C | 1 |
| 19 | 0.372757 | C | 1 |
| 5  | 0.13716  | C | 1 |
| 19 | 0.372757 | C | 1 |
| 19 | 0.372757 | C | 1 |
| 19 | 0.372757 | C | 1 |
| 19 | 0.372757 | C | 1 |
| 19 | 0.372757 | C | 1 |
| 19 | 0.372757 | C | 1 |
| 15 | 0.664584 | C | 1 |
| 19 | 0.372757 | C | 1 |
| 12 | 0.481088 | C | 1 |
| 19 | 0.372757 | C | 1 |

|    |          |   |   |
|----|----------|---|---|
| 15 | 0.664584 | C | 1 |
| 5  | 0.13716  | C | 1 |
| 19 | 0.372757 | C | 1 |
| 12 | 0.481088 | C | 1 |
| 12 | 0.481088 | C | 1 |
| 12 | 0.481088 | C | 1 |
| 19 | 0.372757 | C | 1 |
| 15 | 0.664584 | C | 1 |
| 19 | 0.372757 | C | 1 |
| 12 | 0.481088 | C | 1 |
| 19 | 0.372757 | C | 1 |
| 12 | 0.481088 | C | 1 |
| 5  | 0.13716  | C | 1 |
| 19 | 0.372757 | C | 1 |
| 19 | 0.372757 | C | 1 |
| 19 | 0.372757 | C | 1 |
| 15 | 0.664584 | C | 1 |
| 19 | 0.372757 | C | 1 |
| 18 | 0.268357 | C | 1 |
| 18 | 0.268357 | C | 1 |
| 18 | 0.268357 | C | 1 |
| 18 | 0.268357 | C | 1 |
| 18 | 0.268357 | C | 1 |
| 18 | 0.268357 | C | 1 |
| 13 | 0.2808   | F | 0 |
| 18 | 0.268357 | C | 1 |
| 13 | 0.2808   | F | 0 |
| 13 | 0.2808   | F | 0 |
| 18 | 0.268357 | C | 1 |
| 18 | 0.268357 | C | 1 |
| 18 | 0.268357 | C | 1 |
| 18 | 0.268357 | C | 1 |
| 5  | 0.640136 | C | 1 |
| 5  | 0.640136 | C | 1 |
| 5  | 0.640136 | C | 1 |
| 5  | 0.640136 | C | 1 |
| 5  | 0.640136 | C | 1 |
| 5  | 0.640136 | C | 1 |
| 5  | 0.640136 | C | 1 |
| 5  | 0.640136 | C | 1 |
| 5  | 0.640136 | C | 1 |
| 5  | 0.640136 | C | 1 |
| 5  | 0.640136 | C | 1 |
| 5  | 0.640136 | C | 1 |
| 5  | 0.640136 | C | 1 |
| 6  | 0.120763 | C | 1 |
| 10 | 0.644611 | C | 1 |
| 17 | 0.765948 | C | 1 |
| 13 | 0.489473 | I | 0 |
| 4  | 0.332651 | C | 1 |
| 16 | 0.801873 | C | 1 |
| 20 | 0.330073 | C | 1 |
| 10 | 0.597378 | C | 1 |
| 9  | 0.36394  | C | 1 |
| 11 | 0.740283 | E | 1 |
| 15 | 0.490986 | C | 1 |

|    |          |   |   |
|----|----------|---|---|
| 10 | 0.597378 | C | 1 |
| 12 | 0.490243 | F | 0 |
| 17 | 0.765948 | C | 1 |
| 9  | 0.589437 | C | 1 |
| 5  | 0.098126 | C | 1 |
| 2  | 0.48385  | C | 1 |
| 5  | 0.177922 | I | 0 |
| 19 | 0.502315 | C | 1 |
| 11 | 0.740283 | E | 1 |
| 7  | 0.211823 | I | 0 |
| 9  | 0.589437 | C | 1 |
| 1  | 0.328816 | C | 1 |
| 2  | 0.556368 | M | 0 |
| 4  | 0.638577 | M | 0 |
| 10 | 0.644611 | C | 1 |
| 2  | 0.556368 | M | 0 |
| 20 | 0.331475 | C | 1 |
| 17 | 0.765948 | C | 1 |
| 5  | 0.098126 | C | 1 |
| 15 | 0.490986 | C | 1 |
| 15 | 0.490986 | C | 1 |
| 15 | 0.490986 | C | 1 |
| 4  | 0.638577 | M | 0 |
| 4  | 0.638577 | M | 0 |
| 4  | 0.638577 | M | 0 |
| 4  | 0.638577 | M | 0 |
| 5  | 0.336518 | N | 0 |
| 2  | 0.48385  | C | 1 |
| 23 | 0.541315 | C | 1 |
| 10 | 0.644611 | C | 1 |
| 1  | 0.313568 | I | 0 |
| 20 | 0.330073 | C | 1 |
| 10 | 0.597378 | C | 1 |
| 5  | 0.098126 | C | 1 |
| 10 | 0.597378 | C | 1 |
| 13 | 0.309774 | C | 1 |
| 7  | 0.211823 | I | 0 |
| 5  | 0.177922 | I | 0 |
| 11 | 0.740283 | E | 1 |
| 13 | 0.489473 | I | 0 |
| 20 | 0.331475 | C | 1 |
| 2  | 0.48385  | C | 1 |
| 1  | 0.213318 | G | 0 |
| 1  | 0.218592 | C | 1 |
| 10 | 0.644611 | C | 1 |
| 12 | 0.490243 | F | 0 |
| 16 | 0.801873 | C | 1 |
| 2  | 0.085939 | C | 1 |
| 1  | 0.213318 | G | 0 |
| 5  | 0.098126 | C | 1 |
| 1  | 0.313568 | I | 0 |
| 20 | 0.330073 | C | 1 |
| 7  | 0.211823 | I | 0 |
| 19 | 0.502315 | C | 1 |

|    |          |   |   |
|----|----------|---|---|
| 10 | 0.644611 | C | 1 |
| 2  | 0.085939 | C | 1 |
| 17 | 0.765948 | C | 1 |
| 20 | 0.330073 | C | 1 |
| 2  | 0.48385  | C | 1 |
| 11 | 0.740283 | E | 1 |
| 13 | 0.489473 | I | 0 |
| 16 | 0.801873 | C | 1 |
| 2  | 0.551891 | C | 1 |
| 17 | 0.765948 | C | 1 |
| 5  | 0.336518 | N | 0 |
| 6  | 0.120763 | C | 1 |
| 7  | 0.211823 | I | 0 |
| 16 | 0.801873 | C | 1 |
| 1  | 0.213318 | G | 0 |
| 4  | 0.305641 | I | 0 |
| 17 | 0.765948 | C | 1 |
| 1  | 0.313568 | I | 0 |
| 2  | 0.085939 | C | 1 |
| 17 | 0.765948 | C | 1 |
| 6  | 0.120763 | C | 1 |
| 1  | 0.213318 | G | 0 |
| 11 | 0.740283 | E | 1 |
| 20 | 0.330073 | C | 1 |
| 23 | 0.541315 | C | 1 |
| 20 | 0.331475 | C | 1 |
| 16 | 0.801873 | C | 1 |
| 16 | 0.801873 | C | 1 |
| 9  | 0.36394  | C | 1 |
| 13 | 0.309774 | C | 1 |
| 13 | 0.489473 | I | 0 |
| 13 | 0.489473 | I | 0 |
| 10 | 0.597378 | C | 1 |
| 4  | 0.638577 | M | 0 |
| 10 | 0.597378 | C | 1 |
| 2  | 0.551891 | C | 1 |
| 4  | 0.638577 | M | 0 |
| 19 | 0.458285 | C | 1 |
| 19 | 0.502315 | C | 1 |
| 23 | 0.541315 | C | 1 |
| 13 | 0.489473 | I | 0 |
| 6  | 0.120763 | C | 1 |
| 2  | 0.48385  | C | 1 |
| 1  | 0.313568 | I | 0 |
| 9  | 0.36394  | C | 1 |
| 12 | 0.490243 | F | 0 |
| 17 | 0.765948 | C | 1 |
| 15 | 0.490986 | C | 1 |
| 10 | 0.597378 | C | 1 |
| 13 | 0.309774 | C | 1 |
| 11 | 0.740283 | E | 1 |
| 4  | 0.638577 | M | 0 |
| 10 | 0.597378 | C | 1 |
| 2  | 0.556368 | M | 0 |

|    |          |   |   |
|----|----------|---|---|
| 1  | 0.313568 | I | 0 |
| 5  | 0.336518 | N | 0 |
| 17 | 0.765948 | C | 1 |
| 1  | 0.218592 | C | 1 |
| 15 | 0.490986 | C | 1 |
| 7  | 0.211823 | I | 0 |
| 1  | 0.328816 | C | 1 |
| 11 | 0.740283 | E | 1 |
| 4  | 0.638577 | M | 0 |
| 19 | 0.58424  | K | 1 |
| 2  | 0.556368 | M | 0 |
| 5  | 0.177922 | I | 0 |
| 5  | 0.336518 | N | 0 |
| 1  | 0.328816 | C | 1 |
| 17 | 0.765948 | C | 1 |
| 4  | 0.638577 | M | 0 |
| 4  | 0.305641 | I | 0 |
| 17 | 0.765948 | C | 1 |
| 5  | 0.336518 | N | 0 |
| 11 | 0.740283 | E | 1 |
| 5  | 0.098126 | C | 1 |
| 5  | 0.336518 | N | 0 |
| 17 | 0.765948 | C | 1 |
| 20 | 0.780163 | F | 0 |
| 19 | 0.458285 | C | 1 |
| 4  | 0.305641 | I | 0 |
| 19 | 0.58424  | K | 1 |
| 4  | 0.332651 | C | 1 |
| 17 | 0.765948 | C | 1 |
| 17 | 0.765948 | C | 1 |
| 9  | 0.589437 | C | 1 |
| 16 | 0.801873 | C | 1 |
| 17 | 0.765948 | C | 1 |
| 9  | 0.36394  | C | 1 |
| 2  | 0.48385  | C | 1 |
| 13 | 0.489473 | I | 0 |
| 20 | 0.330073 | C | 1 |
| 10 | 0.597378 | C | 1 |
| 23 | 0.541315 | C | 1 |
| 15 | 0.490986 | C | 1 |
| 10 | 0.644611 | C | 1 |
| 19 | 0.458285 | C | 1 |
| 19 | 0.458285 | C | 1 |
| 15 | 0.490986 | C | 1 |
| 17 | 0.765948 | C | 1 |
| 2  | 0.48385  | C | 1 |
| 17 | 0.765948 | C | 1 |
| 16 | 0.801873 | C | 1 |
| 2  | 0.085939 | C | 1 |
| 16 | 0.801873 | C | 1 |
| 4  | 0.332651 | C | 1 |
| 2  | 0.085939 | C | 1 |
| 2  | 0.48385  | C | 1 |
| 12 | 0.490243 | F | 0 |

|    |          |   |   |
|----|----------|---|---|
| 19 | 0.58424  | K | 1 |
| 4  | 0.638577 | M | 0 |
| 5  | 0.336518 | N | 0 |
| 2  | 0.48385  | C | 1 |
| 5  | 0.336518 | N | 0 |
| 11 | 0.740283 | E | 1 |
| 5  | 0.098126 | C | 1 |
| 4  | 0.332651 | C | 1 |
| 15 | 0.490986 | C | 1 |
| 13 | 0.489473 | I | 0 |
| 13 | 0.489473 | I | 0 |
| 12 | 0.490243 | F | 0 |
| 20 | 0.330073 | C | 1 |
| 17 | 0.765948 | C | 1 |
| 5  | 0.177922 | I | 0 |
| 19 | 0.458285 | C | 1 |
| 13 | 0.489473 | I | 0 |
| 20 | 0.330073 | C | 1 |
| 2  | 0.556368 | M | 0 |
| 9  | 0.589437 | C | 1 |
| 1  | 0.328816 | C | 1 |
| 7  | 0.211823 | I | 0 |
| 13 | 0.489473 | I | 0 |
| 20 | 0.331475 | C | 1 |
| 1  | 0.213318 | G | 0 |
| 13 | 0.489473 | I | 0 |
| 4  | 0.638577 | M | 0 |
| 4  | 0.638577 | M | 0 |
| 1  | 0.218592 | C | 1 |
| 20 | 0.330073 | C | 1 |
| 1  | 0.213318 | G | 0 |
| 11 | 0.740283 | E | 1 |
| 17 | 0.765948 | C | 1 |
| 10 | 0.597378 | C | 1 |
| 5  | 0.177922 | I | 0 |
| 5  | 0.177922 | I | 0 |
| 19 | 0.502315 | C | 1 |
| 17 | 0.765948 | C | 1 |
| 17 | 0.765948 | C | 1 |
| 5  | 0.336518 | N | 0 |
| 23 | 0.541315 | C | 1 |
| 20 | 0.331475 | C | 1 |
| 5  | 0.098126 | C | 1 |
| 5  | 0.336518 | N | 0 |
| 13 | 0.489473 | I | 0 |
| 19 | 0.458285 | C | 1 |
| 5  | 0.098126 | C | 1 |
| 11 | 0.740283 | E | 1 |
| 23 | 0.541315 | C | 1 |
| 9  | 0.36394  | C | 1 |
| 15 | 0.490986 | C | 1 |
| 2  | 0.556368 | M | 0 |
| 10 | 0.644611 | C | 1 |
| 10 | 0.597378 | C | 1 |

|    |          |   |   |
|----|----------|---|---|
| 11 | 0.740283 | E | 1 |
| 11 | 0.740283 | E | 1 |
| 5  | 0.098126 | C | 1 |
| 17 | 0.765948 | C | 1 |
| 10 | 0.597378 | C | 1 |
| 1  | 0.218592 | C | 1 |
| 5  | 0.177922 | I | 0 |
| 5  | 0.336518 | N | 0 |
| 5  | 0.098126 | C | 1 |
| 23 | 0.541315 | C | 1 |
| 9  | 0.36394  | C | 1 |
| 2  | 0.48385  | C | 1 |
| 19 | 0.502315 | C | 1 |
| 1  | 0.218592 | C | 1 |
| 13 | 0.489473 | I | 0 |
| 11 | 0.740283 | E | 1 |
| 15 | 0.490986 | C | 1 |
| 2  | 0.551891 | C | 1 |
| 19 | 0.458285 | C | 1 |
| 15 | 0.490986 | C | 1 |
| 2  | 0.551891 | C | 1 |
| 6  | 0.120763 | C | 1 |
| 15 | 0.490986 | C | 1 |
| 17 | 0.765948 | C | 1 |
| 2  | 0.48385  | C | 1 |
| 10 | 0.644611 | C | 1 |
| 11 | 0.740283 | E | 1 |
| 10 | 0.644611 | C | 1 |
| 17 | 0.765948 | C | 1 |
| 2  | 0.556368 | M | 0 |
| 5  | 0.336518 | N | 0 |
| 19 | 0.502315 | C | 1 |
| 23 | 0.541315 | C | 1 |
| 23 | 0.541315 | C | 1 |
| 20 | 0.330073 | C | 1 |
| 6  | 0.120763 | C | 1 |
| 6  | 0.120763 | C | 1 |
| 20 | 0.330073 | C | 1 |
| 5  | 0.177922 | I | 0 |
| 20 | 0.780163 | F | 0 |
| 11 | 0.740283 | E | 1 |
| 19 | 0.502315 | C | 1 |
| 1  | 0.218592 | C | 1 |
| 9  | 0.589437 | C | 1 |
| 9  | 0.589437 | C | 1 |
| 10 | 0.644611 | C | 1 |
| 2  | 0.551891 | C | 1 |
| 19 | 0.502315 | C | 1 |
| 10 | 0.597378 | C | 1 |
| 4  | 0.305641 | I | 0 |
| 19 | 0.458285 | C | 1 |
| 5  | 0.098126 | C | 1 |
| 2  | 0.556368 | M | 0 |
| 1  | 0.218592 | C | 1 |

|    |          |   |   |
|----|----------|---|---|
| 13 | 0.309774 | C | 1 |
| 5  | 0.336518 | N | 0 |
| 19 | 0.502315 | C | 1 |
| 1  | 0.218592 | C | 1 |
| 9  | 0.589437 | C | 1 |
| 10 | 0.644611 | C | 1 |
| 4  | 0.638577 | M | 0 |
| 4  | 0.638577 | M | 0 |
| 4  | 0.638577 | M | 0 |
| 2  | 0.085939 | C | 1 |
| 19 | 0.458285 | C | 1 |
| 1  | 0.218592 | C | 1 |
| 19 | 0.502315 | C | 1 |
| 10 | 0.644611 | C | 1 |
| 1  | 0.313568 | I | 0 |
| 4  | 0.305641 | I | 0 |
| 15 | 0.490986 | C | 1 |
| 1  | 0.218592 | C | 1 |
| 5  | 0.098126 | C | 1 |
| 19 | 0.502315 | C | 1 |
| 10 | 0.644611 | C | 1 |
| 2  | 0.556368 | M | 0 |
| 13 | 0.309774 | C | 1 |
| 11 | 0.740283 | E | 1 |
| 9  | 0.589437 | C | 1 |
| 5  | 0.098126 | C | 1 |
| 1  | 0.218592 | C | 1 |
| 5  | 0.177922 | I | 0 |
| 1  | 0.328816 | C | 1 |
| 19 | 0.502315 | C | 1 |
| 4  | 0.332651 | C | 1 |
| 10 | 0.597378 | C | 1 |
| 9  | 0.589437 | C | 1 |
| 12 | 0.490243 | F | 0 |
| 13 | 0.309774 | C | 1 |
| 20 | 0.780163 | F | 0 |
| 19 | 0.458285 | C | 1 |
| 5  | 0.177922 | I | 0 |
| 19 | 0.458285 | C | 1 |
| 9  | 0.589437 | C | 1 |
| 13 | 0.309774 | C | 1 |
| 11 | 0.740283 | E | 1 |
| 4  | 0.332651 | C | 1 |
| 4  | 0.638577 | M | 0 |
| 2  | 0.556368 | M | 0 |
| 9  | 0.589437 | C | 1 |
| 6  | 0.442624 | C | 1 |
| 5  | 0.161903 | C | 1 |
| 4  | 0.414065 | A | 0 |
| 6  | 0.442624 | C | 1 |
| 4  | 0.414065 | A | 0 |
| 1  | 0.556462 | N | 0 |
| 16 | 0.617322 | D | 1 |
| 17 | 0.759495 | C | 1 |



|    |          |   |   |
|----|----------|---|---|
| 5  | 0.161903 | C | 1 |
| 6  | 0.442624 | C | 1 |
| 16 | 0.617322 | D | 1 |
| 16 | 0.617322 | D | 1 |
| 19 | 0.415167 | C | 1 |
| 5  | 0.161903 | C | 1 |
| 5  | 0.161903 | C | 1 |
| 5  | 0.161903 | C | 1 |
| 6  | 0.442624 | C | 1 |
| 4  | 0.414065 | A | 0 |
| 4  | 0.414065 | A | 0 |
| 16 | 0.617322 | D | 1 |
| 6  | 0.442624 | C | 1 |
| 17 | 0.759495 | C | 1 |
| 17 | 0.759495 | C | 1 |
| 16 | 0.617322 | D | 1 |
| 1  | 0.556462 | N | 0 |
| 16 | 0.617322 | D | 1 |
| 6  | 0.442624 | C | 1 |
| 4  | 0.414065 | A | 0 |
| 5  | 0.161903 | C | 1 |
| 17 | 0.759495 | C | 1 |
| 16 | 0.617322 | D | 1 |
| 6  | 0.442624 | C | 1 |
| 19 | 0.415167 | C | 1 |
| 6  | 0.442624 | C | 1 |
| 17 | 0.759495 | C | 1 |
| 16 | 0.617322 | D | 1 |
| 16 | 0.617322 | D | 1 |
| 1  | 0.556462 | N | 0 |
| 19 | 0.415167 | C | 1 |
| 17 | 0.759495 | C | 1 |
| 4  | 0.414065 | A | 0 |
| 6  | 0.442624 | C | 1 |
| 4  | 0.414065 | A | 0 |
| 19 | 0.415167 | C | 1 |
| 1  | 0.556462 | N | 0 |
| 19 | 0.415167 | C | 1 |
| 1  | 0.556462 | N | 0 |
| 16 | 0.617322 | D | 1 |
| 19 | 0.415167 | C | 1 |
| 17 | 0.759495 | C | 1 |
| 6  | 0.442624 | C | 1 |
| 16 | 0.617322 | D | 1 |
| 1  | 0.556462 | N | 0 |
| 16 | 0.617322 | D | 1 |
| 4  | 0.414065 | A | 0 |
| 16 | 0.617322 | D | 1 |
| 5  | 0.406202 | C | 1 |
| 12 | 0.411403 | D | 1 |
| 5  | 0.406202 | C | 1 |
| 12 | 0.411403 | D | 1 |
| 7  | 0.544419 | C | 1 |
| 7  | 0.544419 | C | 1 |

|    |          |   |   |
|----|----------|---|---|
| 6  | 0.112883 | C | 1 |
| 7  | 0.544419 | C | 1 |
| 12 | 0.411403 | D | 1 |
| 5  | 0.406202 | C | 1 |
| 12 | 0.411403 | D | 1 |
| 6  | 0.112883 | C | 1 |
| 7  | 0.544419 | C | 1 |
| 7  | 0.544419 | C | 1 |
| 5  | 0.406202 | C | 1 |
| 12 | 0.411403 | D | 1 |
| 6  | 0.112883 | C | 1 |
| 5  | 0.406202 | C | 1 |
| 7  | 0.544419 | C | 1 |
| 12 | 0.411403 | D | 1 |
| 5  | 0.406202 | C | 1 |
| 12 | 0.411403 | D | 1 |
| 5  | 0.406202 | C | 1 |
| 14 | 0.542442 | C | 1 |
| 5  | 0.180784 | C | 1 |
| 5  | 0.180784 | C | 1 |
| 16 | 0.22986  | C | 1 |
| 15 | 0.400904 | C | 1 |
| 5  | 0.180784 | C | 1 |
| 20 | 0.146772 | C | 1 |
| 14 | 0.542442 | C | 1 |
| 12 | 0.538277 | C | 1 |
| 13 | 0.654595 | C | 1 |
| 13 | 0.654595 | C | 1 |
| 14 | 0.542442 | C | 1 |
| 12 | 0.538277 | C | 1 |
| 18 | 0.393602 | C | 1 |
| 14 | 0.542442 | C | 1 |
| 9  | 0.492688 | C | 1 |
| 1  | 0.116188 | C | 1 |
| 14 | 0.542442 | C | 1 |
| 20 | 0.146772 | C | 1 |
| 20 | 0.170875 | C | 1 |
| 14 | 0.542442 | C | 1 |
| 18 | 0.393602 | C | 1 |
| 23 | 0.493372 | C | 1 |
| 14 | 0.542442 | C | 1 |
| 15 | 0.400904 | C | 1 |
| 13 | 0.654595 | C | 1 |
| 9  | 0.492688 | C | 1 |
| 20 | 0.170875 | C | 1 |
| 16 | 0.22986  | C | 1 |
| 12 | 0.538277 | C | 1 |
| 9  | 0.492688 | C | 1 |
| 23 | 0.493372 | C | 1 |
| 16 | 0.22986  | C | 1 |
| 13 | 0.654595 | C | 1 |
| 13 | 0.654595 | C | 1 |
| 9  | 0.492688 | C | 1 |
| 4  | 0.157595 | C | 1 |

|    |          |   |   |
|----|----------|---|---|
| 23 | 0.493372 | C | 1 |
| 18 | 0.393602 | C | 1 |
| 16 | 0.522279 | C | 1 |
| 15 | 0.400904 | C | 1 |
| 9  | 0.492688 | C | 1 |
| 15 | 0.400904 | C | 1 |
| 15 | 0.400904 | C | 1 |
| 1  | 0.116188 | C | 1 |
| 1  | 0.116188 | C | 1 |
| 5  | 0.180784 | C | 1 |
| 5  | 0.180784 | C | 1 |
| 15 | 0.400904 | C | 1 |
| 16 | 0.522279 | C | 1 |
| 14 | 0.542442 | C | 1 |
| 15 | 0.400904 | C | 1 |
| 13 | 0.654595 | C | 1 |
| 20 | 0.146772 | C | 1 |
| 5  | 0.180784 | C | 1 |
| 15 | 0.400904 | C | 1 |
| 16 | 0.22986  | C | 1 |
| 23 | 0.493372 | C | 1 |
| 13 | 0.654595 | C | 1 |
| 14 | 0.542442 | C | 1 |
| 16 | 0.522279 | C | 1 |
| 13 | 0.654595 | C | 1 |
| 14 | 0.542442 | C | 1 |
| 16 | 0.22986  | C | 1 |
| 14 | 0.542442 | C | 1 |
| 5  | 0.180784 | C | 1 |
| 12 | 0.538277 | C | 1 |
| 15 | 0.400904 | C | 1 |
| 9  | 0.492688 | C | 1 |
| 16 | 0.522279 | C | 1 |
| 20 | 0.146772 | C | 1 |
| 14 | 0.542442 | C | 1 |
| 4  | 0.157595 | C | 1 |
| 9  | 0.492688 | C | 1 |
| 12 | 0.538277 | C | 1 |
| 4  | 0.157595 | C | 1 |
| 1  | 0.116188 | C | 1 |
| 9  | 0.492688 | C | 1 |
| 15 | 0.400904 | C | 1 |
| 20 | 0.146772 | C | 1 |
| 14 | 0.542442 | C | 1 |
| 20 | 0.170875 | C | 1 |
| 15 | 0.400904 | C | 1 |
| 15 | 0.400904 | C | 1 |
| 15 | 0.400904 | C | 1 |
| 14 | 0.542442 | C | 1 |
| 1  | 0.116188 | C | 1 |
| 14 | 0.542442 | C | 1 |
| 20 | 0.146772 | C | 1 |
| 15 | 0.400904 | C | 1 |
| 13 | 0.654595 | C | 1 |

|    |          |   |   |
|----|----------|---|---|
| 14 | 0.542442 | C | 1 |
| 20 | 0.170875 | C | 1 |
| 12 | 0.538277 | C | 1 |
| 15 | 0.400904 | C | 1 |
| 20 | 0.146772 | C | 1 |
| 12 | 0.538277 | C | 1 |
| 16 | 0.22986  | C | 1 |
| 20 | 0.146772 | C | 1 |
| 23 | 0.493372 | C | 1 |
| 9  | 0.492688 | C | 1 |
| 20 | 0.146772 | C | 1 |
| 12 | 0.538277 | C | 1 |
| 4  | 0.157595 | C | 1 |
| 13 | 0.654595 | C | 1 |
| 14 | 0.542442 | C | 1 |
| 9  | 0.492688 | C | 1 |
| 14 | 0.542442 | C | 1 |
| 14 | 0.542442 | C | 1 |
| 20 | 0.146772 | C | 1 |
| 14 | 0.542442 | C | 1 |
| 9  | 0.492688 | C | 1 |
| 15 | 0.400904 | C | 1 |
| 9  | 0.492688 | C | 1 |
| 16 | 0.22986  | C | 1 |
| 5  | 0.180784 | C | 1 |
| 4  | 0.157595 | C | 1 |
| 16 | 0.522279 | C | 1 |
| 16 | 0.22986  | C | 1 |
| 15 | 0.400904 | C | 1 |
| 8  | 0.41283  | C | 1 |
| 1  | 0.093929 | C | 1 |
| 2  | 0.288805 | C | 1 |
| 5  | 0.538366 | C | 1 |
| 6  | 0.114889 | C | 1 |
| 6  | 0.374316 | C | 1 |
| 6  | 0.392913 | C | 1 |
| 8  | 0.41283  | C | 1 |
| 8  | 0.41283  | C | 1 |
| 5  | 0.345916 | C | 1 |
| 6  | 0.09005  | C | 1 |
| 20 | 0.251649 | S | 0 |
| 5  | 0.232108 | C | 1 |
| 6  | 0.392913 | C | 1 |
| 9  | 0.451782 | C | 1 |
| 7  | 0.315575 | C | 1 |
| 20 | 0.251649 | S | 0 |
| 6  | 0.392913 | C | 1 |
| 6  | 0.114889 | C | 1 |
| 20 | 0.251649 | S | 0 |
| 6  | 0.114889 | C | 1 |
| 10 | 0.612323 | C | 1 |
| 14 | 0.408727 | C | 1 |
| 5  | 0.232108 | C | 1 |
| 15 | 0.577638 | C | 1 |

|    |          |   |   |
|----|----------|---|---|
| 5  | 0.345916 | C | 1 |
| 5  | 0.232108 | C | 1 |
| 6  | 0.390043 | C | 1 |
| 22 | 0.65617  | N | 0 |
| 6  | 0.390043 | C | 1 |
| 6  | 0.390043 | C | 1 |
| 6  | 0.64626  | C | 1 |
| 5  | 0.538366 | C | 1 |
| 2  | 0.288805 | C | 1 |
| 14 | 0.408727 | C | 1 |
| 11 | 0.401644 | Q | 0 |
| 15 | 0.577638 | C | 1 |
| 2  | 0.288805 | C | 1 |
| 10 | 0.612323 | C | 1 |
| 22 | 0.596319 | C | 1 |
| 22 | 0.596319 | C | 1 |
| 8  | 0.41283  | C | 1 |
| 20 | 0.251649 | S | 0 |
| 5  | 0.538366 | C | 1 |
| 22 | 0.65617  | N | 0 |
| 20 | 0.251649 | S | 0 |
| 11 | 0.401644 | Q | 0 |
| 15 | 0.577638 | C | 1 |
| 6  | 0.114889 | C | 1 |
| 6  | 0.374316 | C | 1 |
| 22 | 0.596319 | C | 1 |
| 22 | 0.596319 | C | 1 |
| 1  | 0.275797 | C | 1 |
| 22 | 0.65617  | N | 0 |
| 5  | 0.345916 | C | 1 |
| 8  | 0.41283  | C | 1 |
| 14 | 0.408727 | C | 1 |
| 6  | 0.374316 | C | 1 |
| 6  | 0.390043 | C | 1 |
| 15 | 0.577638 | C | 1 |
| 2  | 0.288805 | C | 1 |
| 9  | 0.451782 | C | 1 |
| 2  | 0.288805 | C | 1 |
| 5  | 0.538366 | C | 1 |
| 5  | 0.345916 | C | 1 |
| 10 | 0.612323 | C | 1 |
| 6  | 0.392913 | C | 1 |
| 6  | 0.64626  | C | 1 |
| 9  | 0.451782 | C | 1 |
| 20 | 0.251649 | S | 0 |
| 9  | 0.451782 | C | 1 |
| 10 | 0.612323 | C | 1 |
| 5  | 0.345916 | C | 1 |
| 14 | 0.408727 | C | 1 |
| 6  | 0.09005  | C | 1 |
| 14 | 0.408727 | C | 1 |
| 6  | 0.392913 | C | 1 |
| 6  | 0.114889 | C | 1 |
| 5  | 0.345916 | C | 1 |

|    |          |   |   |
|----|----------|---|---|
| 14 | 0.408727 | C | 1 |
| 15 | 0.577638 | C | 1 |
| 6  | 0.390043 | C | 1 |
| 8  | 0.41283  | C | 1 |
| 5  | 0.538366 | C | 1 |
| 22 | 0.596319 | C | 1 |
| 1  | 0.093929 | C | 1 |
| 6  | 0.392913 | C | 1 |
| 5  | 0.129744 | C | 1 |
| 14 | 0.408727 | C | 1 |
| 6  | 0.114889 | C | 1 |
| 6  | 0.09005  | C | 1 |
| 14 | 0.408727 | C | 1 |
| 10 | 0.612323 | C | 1 |
| 6  | 0.64626  | C | 1 |
| 6  | 0.64626  | C | 1 |
| 22 | 0.596319 | C | 1 |
| 22 | 0.65617  | N | 0 |
| 7  | 0.315575 | C | 1 |
| 9  | 0.635863 | C | 1 |
| 14 | 0.408727 | C | 1 |
| 8  | 0.41283  | C | 1 |
| 6  | 0.390043 | C | 1 |
| 5  | 0.232108 | C | 1 |
| 5  | 0.345916 | C | 1 |
| 6  | 0.114889 | C | 1 |
| 20 | 0.251649 | S | 0 |
| 14 | 0.408727 | C | 1 |
| 5  | 0.345916 | C | 1 |
| 6  | 0.09005  | C | 1 |
| 6  | 0.64626  | C | 1 |
| 5  | 0.129744 | C | 1 |
| 5  | 0.538366 | C | 1 |
| 5  | 0.129744 | C | 1 |
| 14 | 0.408727 | C | 1 |
| 6  | 0.114889 | C | 1 |
| 7  | 0.315575 | C | 1 |
| 9  | 0.451782 | C | 1 |
| 6  | 0.09005  | C | 1 |
| 9  | 0.451782 | C | 1 |
| 1  | 0.093929 | C | 1 |
| 5  | 0.129744 | C | 1 |
| 14 | 0.408727 | C | 1 |
| 6  | 0.374316 | C | 1 |
| 10 | 0.612323 | C | 1 |
| 5  | 0.345916 | C | 1 |
| 8  | 0.41283  | C | 1 |
| 7  | 0.315575 | C | 1 |
| 9  | 0.635863 | C | 1 |
| 8  | 0.41283  | C | 1 |
| 14 | 0.408727 | C | 1 |
| 5  | 0.345916 | C | 1 |
| 7  | 0.315575 | C | 1 |
| 8  | 0.41283  | C | 1 |

|    |          |   |   |
|----|----------|---|---|
| 7  | 0.315575 | C | 1 |
| 7  | 0.315575 | C | 1 |
| 9  | 0.451782 | C | 1 |
| 5  | 0.345916 | C | 1 |
| 6  | 0.392913 | C | 1 |
| 10 | 0.612323 | C | 1 |
| 6  | 0.392913 | C | 1 |
| 9  | 0.451782 | C | 1 |
| 14 | 0.408727 | C | 1 |
| 5  | 0.129744 | C | 1 |
| 6  | 0.09005  | C | 1 |
| 6  | 0.09005  | C | 1 |
| 2  | 0.288805 | C | 1 |
| 6  | 0.390043 | C | 1 |
| 5  | 0.129744 | C | 1 |
| 5  | 0.345916 | C | 1 |
| 22 | 0.596319 | C | 1 |
| 5  | 0.232108 | C | 1 |
| 6  | 0.392913 | C | 1 |
| 9  | 0.451782 | C | 1 |
| 11 | 0.401644 | Q | 0 |
| 6  | 0.392913 | C | 1 |
| 5  | 0.538366 | C | 1 |
| 6  | 0.390043 | C | 1 |
| 20 | 0.251649 | S | 0 |
| 14 | 0.408727 | C | 1 |
| 10 | 0.612323 | C | 1 |
| 10 | 0.612323 | C | 1 |
| 5  | 0.345916 | C | 1 |
| 10 | 0.612323 | C | 1 |
| 5  | 0.538366 | C | 1 |
| 9  | 0.635863 | C | 1 |
| 6  | 0.64626  | C | 1 |
| 20 | 0.251649 | S | 0 |
| 6  | 0.374316 | C | 1 |
| 10 | 0.612323 | C | 1 |
| 14 | 0.408727 | C | 1 |
| 15 | 0.577638 | C | 1 |
| 14 | 0.408727 | C | 1 |
| 14 | 0.408727 | C | 1 |
| 22 | 0.65617  | N | 0 |
| 10 | 0.612323 | C | 1 |
| 6  | 0.374316 | C | 1 |
| 5  | 0.538366 | C | 1 |
| 6  | 0.64626  | C | 1 |
| 14 | 0.408727 | C | 1 |
| 14 | 0.408727 | C | 1 |
| 8  | 0.41283  | C | 1 |
| 6  | 0.09005  | C | 1 |
| 14 | 0.408727 | C | 1 |
| 6  | 0.114889 | C | 1 |
| 14 | 0.408727 | C | 1 |
| 2  | 0.288805 | C | 1 |
| 1  | 0.275797 | C | 1 |

|    |          |   |   |
|----|----------|---|---|
| 1  | 0.275797 | C | 1 |
| 14 | 0.408727 | C | 1 |
| 5  | 0.345916 | C | 1 |
| 2  | 0.288805 | C | 1 |
| 5  | 0.129744 | C | 1 |
| 5  | 0.129744 | C | 1 |
| 6  | 0.09005  | C | 1 |
| 6  | 0.09005  | C | 1 |
| 8  | 0.41283  | C | 1 |
| 5  | 0.129744 | C | 1 |
| 2  | 0.288805 | C | 1 |
| 22 | 0.65617  | N | 0 |
| 20 | 0.251649 | S | 0 |
| 15 | 0.577638 | C | 1 |
| 7  | 0.315575 | C | 1 |
| 10 | 0.612323 | C | 1 |
| 5  | 0.538366 | C | 1 |
| 14 | 0.408727 | C | 1 |
| 15 | 0.577638 | C | 1 |
| 5  | 0.232108 | C | 1 |
| 22 | 0.596319 | C | 1 |
| 22 | 0.596319 | C | 1 |
| 10 | 0.612323 | C | 1 |
| 6  | 0.64626  | C | 1 |
| 5  | 0.354532 | C | 1 |
| 5  | 0.354532 | C | 1 |
| 5  | 0.354532 | C | 1 |
| 5  | 0.354532 | C | 1 |
| 10 | 0.628088 | C | 1 |
| 5  | 0.354532 | C | 1 |
| 2  | 0.562191 | A | 0 |
| 5  | 0.354532 | C | 1 |
| 5  | 0.354532 | C | 1 |
| 10 | 0.628088 | C | 1 |
| 5  | 0.354532 | C | 1 |
| 10 | 0.628088 | C | 1 |
| 9  | 0.317918 | C | 1 |
| 2  | 0.562191 | A | 0 |
| 9  | 0.317918 | C | 1 |
| 9  | 0.317918 | C | 1 |
| 9  | 0.317918 | C | 1 |
| 9  | 0.317918 | C | 1 |
| 2  | 0.562191 | A | 0 |
| 5  | 0.354532 | C | 1 |
| 19 | 0.657712 | F | 0 |
| 2  | 0.068284 | C | 1 |
| 6  | 0.475142 | I | 0 |
| 6  | 0.475142 | I | 0 |
| 5  | 0.296992 | C | 1 |
| 6  | 0.241706 | C | 1 |
| 8  | 0.624875 | C | 1 |
| 23 | 0.823454 | C | 1 |
| 5  | 0.480659 | C | 1 |
| 4  | 0.120665 | C | 1 |



|    |          |   |   |
|----|----------|---|---|
| 14 | 0.476281 | C | 1 |
| 6  | 0.241706 | C | 1 |
| 14 | 0.476281 | C | 1 |
| 2  | 0.068284 | C | 1 |
| 5  | 0.480659 | C | 1 |
| 6  | 0.356599 | C | 1 |
| 22 | 0.923242 | C | 1 |
| 8  | 0.624875 | C | 1 |
| 5  | 0.480659 | C | 1 |
| 6  | 0.180817 | M | 0 |
| 4  | 0.120665 | C | 1 |
| 1  | 0.22827  | C | 1 |
| 5  | 0.480659 | C | 1 |
| 14 | 0.476281 | C | 1 |
| 14 | 0.476281 | C | 1 |
| 5  | 0.418534 | C | 1 |
| 5  | 0.296992 | C | 1 |
| 5  | 0.418534 | C | 1 |
| 19 | 0.657712 | F | 0 |
| 5  | 0.296992 | C | 1 |
| 14 | 0.476281 | C | 1 |
| 6  | 0.180817 | M | 0 |
| 8  | 0.624875 | C | 1 |
| 6  | 0.475142 | I | 0 |
| 5  | 0.418534 | C | 1 |
| 6  | 0.577905 | C | 1 |
| 22 | 0.923242 | C | 1 |
| 14 | 0.476281 | C | 1 |
| 5  | 0.279485 | I | 0 |
| 8  | 0.624875 | C | 1 |
| 6  | 0.577905 | C | 1 |
| 5  | 0.418534 | C | 1 |
| 5  | 0.296992 | C | 1 |
| 14 | 0.476281 | C | 1 |
| 14 | 0.476281 | C | 1 |
| 8  | 0.624875 | C | 1 |
| 5  | 0.296992 | C | 1 |
| 6  | 0.356599 | C | 1 |
| 14 | 0.476281 | C | 1 |
| 6  | 0.356599 | C | 1 |
| 1  | 0.22827  | C | 1 |
| 6  | 0.180817 | M | 0 |
| 23 | 0.823454 | C | 1 |
| 5  | 0.296992 | C | 1 |
| 6  | 0.180817 | M | 0 |
| 5  | 0.480659 | C | 1 |
| 6  | 0.577905 | C | 1 |
| 5  | 0.418534 | C | 1 |
| 5  | 0.279485 | I | 0 |
| 23 | 0.823454 | C | 1 |
| 2  | 0.17297  | C | 1 |
| 14 | 0.476281 | C | 1 |
| 5  | 0.279485 | I | 0 |
| 14 | 0.476281 | C | 1 |

|    |          |   |   |
|----|----------|---|---|
| 5  | 0.480659 | C | 1 |
| 5  | 0.480659 | C | 1 |
| 2  | 0.068284 | C | 1 |
| 4  | 0.120665 | C | 1 |
| 19 | 0.657712 | F | 0 |
| 5  | 0.480659 | C | 1 |
| 19 | 0.657712 | F | 0 |
| 6  | 0.577905 | C | 1 |
| 5  | 0.418534 | C | 1 |
| 19 | 0.657712 | F | 0 |
| 14 | 0.476281 | C | 1 |
| 23 | 0.823454 | C | 1 |
| 5  | 0.279485 | I | 0 |
| 14 | 0.476281 | C | 1 |
| 5  | 0.296992 | C | 1 |
| 5  | 0.418534 | C | 1 |
| 22 | 0.923242 | C | 1 |
| 5  | 0.480659 | C | 1 |
| 6  | 0.356599 | C | 1 |
| 6  | 0.356599 | C | 1 |
| 23 | 0.823454 | C | 1 |
| 5  | 0.279485 | I | 0 |
| 19 | 0.657712 | F | 0 |
| 22 | 0.923242 | C | 1 |
| 5  | 0.480659 | C | 1 |
| 22 | 0.923242 | C | 1 |
| 23 | 0.823454 | C | 1 |
| 4  | 0.120665 | C | 1 |
| 6  | 0.180817 | M | 0 |
| 6  | 0.241706 | C | 1 |
| 6  | 0.241706 | C | 1 |
| 6  | 0.475142 | I | 0 |
| 5  | 0.418534 | C | 1 |
| 8  | 0.624875 | C | 1 |
| 2  | 0.17297  | C | 1 |
| 6  | 0.180817 | M | 0 |
| 4  | 0.120665 | C | 1 |
| 14 | 0.476281 | C | 1 |
| 5  | 0.418534 | C | 1 |
| 22 | 0.923242 | C | 1 |
| 6  | 0.241706 | C | 1 |
| 6  | 0.356599 | C | 1 |
| 5  | 0.418534 | C | 1 |
| 6  | 0.356599 | C | 1 |
| 19 | 0.657712 | F | 0 |
| 6  | 0.577905 | C | 1 |
| 5  | 0.279485 | I | 0 |
| 19 | 0.657712 | F | 0 |
| 22 | 0.923242 | C | 1 |
| 6  | 0.356599 | C | 1 |
| 6  | 0.241706 | C | 1 |
| 6  | 0.180817 | M | 0 |
| 4  | 0.120665 | C | 1 |
| 8  | 0.624875 | C | 1 |

|    |          |   |   |
|----|----------|---|---|
| 5  | 0.279485 | I | 0 |
| 23 | 0.823454 | C | 1 |
| 23 | 0.823454 | C | 1 |
| 4  | 0.120665 | C | 1 |
| 22 | 0.923242 | C | 1 |
| 6  | 0.180817 | M | 0 |
| 22 | 0.923242 | C | 1 |
| 8  | 0.624875 | C | 1 |
| 22 | 0.923242 | C | 1 |
| 22 | 0.923242 | C | 1 |
| 14 | 0.476281 | C | 1 |
| 14 | 0.476281 | C | 1 |
| 22 | 0.923242 | C | 1 |
| 6  | 0.356599 | C | 1 |
| 6  | 0.577905 | C | 1 |
| 2  | 0.068284 | C | 1 |
| 8  | 0.624875 | C | 1 |
| 6  | 0.577905 | C | 1 |
| 6  | 0.241706 | C | 1 |
| 1  | 0.22827  | C | 1 |
| 6  | 0.356599 | C | 1 |
| 6  | 0.180817 | M | 0 |
| 23 | 0.823454 | C | 1 |
| 6  | 0.356599 | C | 1 |
| 4  | 0.120665 | C | 1 |
| 6  | 0.180817 | M | 0 |
| 6  | 0.577905 | C | 1 |
| 5  | 0.279485 | I | 0 |
| 1  | 0.22827  | C | 1 |
| 8  | 0.624875 | C | 1 |
| 5  | 0.296992 | C | 1 |
| 5  | 0.418534 | C | 1 |
| 6  | 0.475142 | I | 0 |
| 2  | 0.17297  | C | 1 |
| 1  | 0.22827  | C | 1 |
| 5  | 0.279485 | I | 0 |
| 6  | 0.180817 | M | 0 |
| 2  | 0.068284 | C | 1 |
| 6  | 0.180817 | M | 0 |
| 6  | 0.475142 | I | 0 |
| 6  | 0.180817 | M | 0 |
| 5  | 0.418534 | C | 1 |
| 5  | 0.480659 | C | 1 |
| 23 | 0.823454 | C | 1 |
| 6  | 0.180817 | M | 0 |
| 6  | 0.180817 | M | 0 |
| 6  | 0.241706 | C | 1 |
| 23 | 0.823454 | C | 1 |
| 23 | 0.823454 | C | 1 |
| 9  | 0.337273 | I | 0 |
| 6  | 0.401952 | C | 1 |
| 6  | 0.251721 | C | 1 |
| 4  | 0.131746 | C | 1 |
| 17 | 0.341601 | C | 1 |

|    |          |   |   |
|----|----------|---|---|
| 5  | 0.571387 | C | 1 |
| 5  | 0.571387 | C | 1 |
| 5  | 0.415596 | C | 1 |
| 6  | 0.251721 | C | 1 |
| 6  | 0.382167 | C | 1 |
| 2  | 0.144061 | C | 1 |
| 13 | 0.319422 | C | 1 |
| 7  | 0.519081 | C | 1 |
| 9  | 0.466098 | C | 1 |
| 4  | 0.131746 | C | 1 |
| 6  | 0.382167 | C | 1 |
| 1  | 0.153551 | C | 1 |
| 9  | 0.337273 | I | 0 |
| 2  | 0.144061 | C | 1 |
| 4  | 0.328319 | C | 1 |
| 8  | 0.267792 | C | 1 |
| 12 | 0.155509 | C | 1 |
| 2  | 0.250388 | C | 1 |
| 4  | 0.333559 | C | 1 |
| 2  | 0.144061 | C | 1 |
| 6  | 0.401952 | C | 1 |
| 2  | 0.124187 | C | 1 |
| 1  | 0.12303  | C | 1 |
| 10 | 0.309207 | C | 1 |
| 17 | 0.341601 | C | 1 |
| 12 | 0.404719 | C | 1 |
| 9  | 0.466098 | C | 1 |
| 6  | 0.382167 | C | 1 |
| 4  | 0.328319 | C | 1 |
| 2  | 0.144061 | C | 1 |
| 6  | 0.228187 | C | 1 |
| 17 | 0.341601 | C | 1 |
| 16 | 0.612722 | C | 1 |
| 6  | 0.401952 | C | 1 |
| 6  | 0.401952 | C | 1 |
| 2  | 0.250388 | C | 1 |
| 8  | 0.138659 | C | 1 |
| 6  | 0.228187 | C | 1 |
| 12 | 0.155509 | C | 1 |
| 5  | 0.415596 | C | 1 |
| 13 | 0.319422 | C | 1 |
| 1  | 0.550007 | C | 1 |
| 9  | 0.337273 | I | 0 |
| 2  | 0.250388 | C | 1 |
| 1  | 0.12303  | C | 1 |
| 5  | 0.571387 | C | 1 |
| 2  | 0.144061 | C | 1 |
| 10 | 0.309207 | C | 1 |
| 7  | 0.519081 | C | 1 |
| 8  | 0.138659 | C | 1 |
| 12 | 0.419643 | C | 1 |
| 2  | 0.144061 | C | 1 |
| 4  | 0.328319 | C | 1 |
| 8  | 0.267792 | C | 1 |

|    |          |   |   |
|----|----------|---|---|
| 4  | 0.131746 | C | 1 |
| 17 | 0.341601 | C | 1 |
| 6  | 0.117225 | C | 1 |
| 16 | 0.612722 | C | 1 |
| 2  | 0.144061 | C | 1 |
| 12 | 0.404719 | C | 1 |
| 9  | 0.466098 | C | 1 |
| 4  | 0.131746 | C | 1 |
| 2  | 0.144061 | C | 1 |
| 4  | 0.131746 | C | 1 |
| 12 | 0.419643 | C | 1 |
| 4  | 0.328319 | C | 1 |
| 10 | 0.309207 | C | 1 |
| 6  | 0.382167 | C | 1 |
| 6  | 0.380318 | C | 1 |
| 4  | 0.131746 | C | 1 |
| 6  | 0.401952 | C | 1 |
| 6  | 0.251721 | C | 1 |
| 5  | 0.415596 | C | 1 |
| 6  | 0.382167 | C | 1 |
| 4  | 0.328319 | C | 1 |
| 5  | 0.415596 | C | 1 |
| 12 | 0.419643 | C | 1 |
| 6  | 0.401952 | C | 1 |
| 8  | 0.267792 | C | 1 |
| 4  | 0.131746 | C | 1 |
| 6  | 0.401952 | C | 1 |
| 5  | 0.415596 | C | 1 |
| 1  | 0.550007 | C | 1 |
| 2  | 0.124187 | C | 1 |
| 16 | 0.612722 | C | 1 |
| 6  | 0.482801 | C | 1 |
| 6  | 0.228187 | C | 1 |
| 7  | 0.519081 | C | 1 |
| 7  | 0.519081 | C | 1 |
| 10 | 0.309207 | C | 1 |
| 6  | 0.117225 | C | 1 |
| 6  | 0.382167 | C | 1 |
| 6  | 0.382167 | C | 1 |
| 6  | 0.117225 | C | 1 |
| 6  | 0.380318 | C | 1 |
| 16 | 0.612722 | C | 1 |
| 9  | 0.466098 | C | 1 |
| 1  | 0.550007 | C | 1 |
| 16 | 0.612722 | C | 1 |
| 6  | 0.482801 | C | 1 |
| 12 | 0.155509 | C | 1 |
| 6  | 0.401952 | C | 1 |
| 1  | 0.153551 | C | 1 |
| 12 | 0.419643 | C | 1 |
| 6  | 0.228187 | C | 1 |
| 17 | 0.341601 | C | 1 |
| 9  | 0.337273 | I | 0 |
| 6  | 0.117225 | C | 1 |

|    |          |   |   |
|----|----------|---|---|
| 1  | 0.12303  | C | 1 |
| 13 | 0.319422 | C | 1 |
| 5  | 0.571387 | C | 1 |
| 6  | 0.380318 | C | 1 |
| 10 | 0.309207 | C | 1 |
| 6  | 0.482801 | C | 1 |
| 6  | 0.251721 | C | 1 |
| 1  | 0.12303  | C | 1 |
| 2  | 0.250388 | C | 1 |
| 8  | 0.267792 | C | 1 |
| 10 | 0.309207 | C | 1 |
| 9  | 0.466098 | C | 1 |
| 6  | 0.382167 | C | 1 |
| 9  | 0.466098 | C | 1 |
| 6  | 0.380318 | C | 1 |
| 17 | 0.341601 | C | 1 |
| 7  | 0.519081 | C | 1 |
| 6  | 0.380318 | C | 1 |
| 6  | 0.251721 | C | 1 |
| 6  | 0.382167 | C | 1 |
| 13 | 0.319422 | C | 1 |
| 9  | 0.337273 | I | 0 |
| 13 | 0.319422 | C | 1 |
| 6  | 0.380318 | C | 1 |
| 9  | 0.466098 | C | 1 |
| 4  | 0.328319 | C | 1 |
| 6  | 0.380318 | C | 1 |
| 13 | 0.319422 | C | 1 |
| 4  | 0.333559 | C | 1 |
| 12 | 0.155509 | C | 1 |
| 1  | 0.550007 | C | 1 |
| 1  | 0.550007 | C | 1 |
| 6  | 0.482801 | C | 1 |
| 8  | 0.138659 | C | 1 |
| 6  | 0.380318 | C | 1 |
| 12 | 0.419643 | C | 1 |
| 8  | 0.267792 | C | 1 |
| 9  | 0.466098 | C | 1 |
| 5  | 0.571387 | C | 1 |
| 8  | 0.138659 | C | 1 |
| 4  | 0.333559 | C | 1 |
| 6  | 0.117225 | C | 1 |
| 12 | 0.404719 | C | 1 |
| 16 | 0.612722 | C | 1 |
| 5  | 0.571387 | C | 1 |
| 12 | 0.155509 | C | 1 |
| 9  | 0.337273 | I | 0 |
| 12 | 0.155509 | C | 1 |
| 8  | 0.138659 | C | 1 |
| 13 | 0.319422 | C | 1 |
| 5  | 0.571387 | C | 1 |
| 8  | 0.138659 | C | 1 |
| 6  | 0.228187 | C | 1 |
| 9  | 0.466098 | C | 1 |

|    |          |   |   |
|----|----------|---|---|
| 10 | 0.309207 | C | 1 |
| 2  | 0.124187 | C | 1 |
| 9  | 0.466098 | C | 1 |
| 4  | 0.333559 | C | 1 |
| 12 | 0.419643 | C | 1 |
| 12 | 0.419643 | C | 1 |
| 10 | 0.309207 | C | 1 |
| 9  | 0.337273 | I | 0 |
| 4  | 0.131746 | C | 1 |
| 4  | 0.333559 | C | 1 |
| 6  | 0.380318 | C | 1 |
| 4  | 0.131746 | C | 1 |
| 4  | 0.131746 | C | 1 |
| 9  | 0.466098 | C | 1 |
| 4  | 0.333559 | C | 1 |
| 8  | 0.267792 | C | 1 |
| 12 | 0.404719 | C | 1 |
| 6  | 0.382167 | C | 1 |
| 4  | 0.131746 | C | 1 |
| 8  | 0.138659 | C | 1 |
| 4  | 0.328319 | C | 1 |
| 1  | 0.153551 | C | 1 |
| 6  | 0.117225 | C | 1 |
| 12 | 0.419643 | C | 1 |
| 5  | 0.415596 | C | 1 |
| 5  | 0.415596 | C | 1 |
| 5  | 0.415596 | C | 1 |
| 5  | 0.415596 | C | 1 |
| 4  | 0.131746 | C | 1 |
| 6  | 0.117225 | C | 1 |
| 12 | 0.419643 | C | 1 |
| 8  | 0.138659 | C | 1 |
| 6  | 0.482801 | C | 1 |
| 8  | 0.267792 | C | 1 |
| 17 | 0.341601 | C | 1 |
| 10 | 0.309207 | C | 1 |
| 16 | 0.612722 | C | 1 |
| 8  | 0.267792 | C | 1 |
| 4  | 0.333559 | C | 1 |
| 5  | 0.415596 | C | 1 |
| 12 | 0.404719 | C | 1 |
| 4  | 0.131746 | C | 1 |
| 8  | 0.267792 | C | 1 |
| 8  | 0.267792 | C | 1 |
| 2  | 0.144061 | C | 1 |
| 6  | 0.251721 | C | 1 |
| 5  | 0.415596 | C | 1 |
| 7  | 0.519081 | C | 1 |
| 16 | 0.612722 | C | 1 |
| 7  | 0.519081 | C | 1 |
| 9  | 0.466098 | C | 1 |
| 12 | 0.404719 | C | 1 |
| 12 | 0.419643 | C | 1 |
| 12 | 0.404719 | C | 1 |

|    |          |   |   |
|----|----------|---|---|
| 7  | 0.519081 | C | 1 |
| 7  | 0.519081 | C | 1 |
| 5  | 0.415596 | C | 1 |
| 8  | 0.267792 | C | 1 |
| 13 | 0.319422 | C | 1 |
| 12 | 0.419643 | C | 1 |
| 5  | 0.415596 | C | 1 |
| 12 | 0.404719 | C | 1 |
| 8  | 0.267792 | C | 1 |
| 1  | 0.12303  | C | 1 |
| 10 | 0.309207 | C | 1 |
| 12 | 0.419643 | C | 1 |
| 6  | 0.251721 | C | 1 |
| 4  | 0.328319 | C | 1 |
| 9  | 0.466098 | C | 1 |
| 4  | 0.328319 | C | 1 |
| 6  | 0.117225 | C | 1 |
| 4  | 0.328319 | C | 1 |
| 4  | 0.333559 | C | 1 |
| 6  | 0.401952 | C | 1 |
| 9  | 0.466098 | C | 1 |
| 6  | 0.401952 | C | 1 |
| 5  | 0.571387 | C | 1 |
| 2  | 0.250388 | C | 1 |
| 6  | 0.290476 | I | 0 |
| 14 | 0.316436 | R | 0 |
| 2  | 0.167517 | C | 1 |
| 2  | 0.167517 | C | 1 |
| 23 | 0.586964 | C | 1 |
| 19 | 0.329399 | A | 0 |
| 5  | 0.185809 | C | 1 |
| 18 | 0.294365 | C | 1 |
| 19 | 0.329399 | A | 0 |
| 20 | 0.294238 | C | 1 |
| 5  | 0.185809 | C | 1 |
| 7  | 0.274289 | C | 1 |
| 8  | 0.306817 | I | 0 |
| 2  | 0.695716 | N | 0 |
| 8  | 0.306817 | I | 0 |
| 19 | 0.581855 | C | 1 |
| 6  | 0.388341 | A | 0 |
| 15 | 0.685693 | C | 1 |
| 19 | 0.581855 | C | 1 |
| 7  | 0.274289 | C | 1 |
| 8  | 0.306817 | I | 0 |
| 8  | 0.306817 | I | 0 |
| 15 | 0.685693 | C | 1 |
| 20 | 0.294238 | C | 1 |
| 8  | 0.306817 | I | 0 |
| 15 | 0.685693 | C | 1 |
| 7  | 0.274289 | C | 1 |
| 7  | 0.274289 | C | 1 |
| 5  | 0.499997 | C | 1 |
| 2  | 0.695716 | N | 0 |



|    |          |   |   |
|----|----------|---|---|
| 15 | 0.685693 | C | 1 |
| 14 | 0.316436 | R | 0 |
| 5  | 0.488396 | C | 1 |
| 8  | 0.306817 | I | 0 |
| 1  | 0.643391 | C | 1 |
| 5  | 0.488396 | C | 1 |
| 18 | 0.294365 | C | 1 |
| 14 | 0.316436 | R | 0 |
| 5  | 0.446166 | C | 1 |
| 15 | 0.685693 | C | 1 |
| 8  | 0.306817 | I | 0 |
| 8  | 0.306817 | I | 0 |
| 8  | 0.306817 | I | 0 |
| 15 | 0.685693 | C | 1 |
| 15 | 0.685693 | C | 1 |
| 6  | 0.388341 | A | 0 |
| 1  | 0.643391 | C | 1 |
| 19 | 0.581855 | C | 1 |
| 12 | 0.653489 | C | 1 |
| 19 | 0.837881 | C | 1 |
| 15 | 0.685693 | C | 1 |
| 2  | 0.167517 | C | 1 |
| 5  | 0.446166 | C | 1 |
| 5  | 0.499997 | C | 1 |
| 7  | 0.274289 | C | 1 |
| 19 | 0.581855 | C | 1 |
| 5  | 0.185809 | C | 1 |
| 15 | 0.685693 | C | 1 |
| 19 | 0.837881 | C | 1 |
| 19 | 0.837881 | C | 1 |
| 5  | 0.488396 | C | 1 |
| 1  | 0.643391 | C | 1 |
| 19 | 0.329399 | A | 0 |
| 12 | 0.653489 | C | 1 |
| 12 | 0.546751 | C | 1 |
| 5  | 0.185809 | C | 1 |
| 8  | 0.306817 | I | 0 |
| 19 | 0.329399 | A | 0 |
| 5  | 0.488396 | C | 1 |
| 15 | 0.685693 | C | 1 |
| 23 | 0.586964 | C | 1 |
| 5  | 0.499997 | C | 1 |
| 8  | 0.306817 | I | 0 |
| 15 | 0.685693 | C | 1 |
| 5  | 0.281663 | C | 1 |
| 5  | 0.446166 | C | 1 |
| 6  | 0.290476 | I | 0 |
| 1  | 0.643391 | C | 1 |
| 15 | 0.685693 | C | 1 |
| 7  | 0.274289 | C | 1 |
| 12 | 0.683987 | C | 1 |
| 18 | 0.294365 | C | 1 |
| 8  | 0.306817 | I | 0 |
| 2  | 0.695716 | N | 0 |

|    |          |   |   |
|----|----------|---|---|
| 12 | 0.683987 | C | 1 |
| 5  | 0.185809 | C | 1 |
| 15 | 0.685693 | C | 1 |
| 7  | 0.274289 | C | 1 |
| 2  | 0.695716 | N | 0 |
| 9  | 0.648752 | E | 1 |
| 15 | 0.685693 | C | 1 |
| 5  | 0.281663 | C | 1 |
| 14 | 0.316436 | R | 0 |
| 14 | 0.316436 | R | 0 |
| 14 | 0.316436 | R | 0 |
| 6  | 0.290476 | I | 0 |
| 5  | 0.488396 | C | 1 |
| 14 | 0.316436 | R | 0 |
| 4  | 0.128298 | C | 1 |
| 8  | 0.306817 | I | 0 |
| 5  | 0.488396 | C | 1 |
| 19 | 0.581855 | C | 1 |
| 2  | 0.167517 | C | 1 |
| 15 | 0.685693 | C | 1 |
| 5  | 0.499997 | C | 1 |
| 5  | 0.281663 | C | 1 |
| 5  | 0.185809 | C | 1 |
| 6  | 0.388341 | A | 0 |
| 5  | 0.185809 | C | 1 |
| 6  | 0.388341 | A | 0 |
| 19 | 0.329399 | A | 0 |
| 5  | 0.446166 | C | 1 |
| 5  | 0.185809 | C | 1 |
| 23 | 0.586964 | C | 1 |
| 2  | 0.555545 | C | 1 |
| 15 | 0.685693 | C | 1 |
| 19 | 0.837881 | C | 1 |
| 12 | 0.653489 | C | 1 |
| 4  | 0.128298 | C | 1 |
| 5  | 0.499997 | C | 1 |
| 8  | 0.306817 | I | 0 |
| 5  | 0.446166 | C | 1 |
| 15 | 0.685693 | C | 1 |
| 15 | 0.685693 | C | 1 |
| 18 | 0.294365 | C | 1 |
| 1  | 0.643391 | C | 1 |
| 2  | 0.695716 | N | 0 |
| 5  | 0.446166 | C | 1 |
| 14 | 0.316436 | R | 0 |
| 19 | 0.581855 | C | 1 |
| 23 | 0.586964 | C | 1 |
| 18 | 0.294365 | C | 1 |
| 8  | 0.306817 | I | 0 |
| 15 | 0.685693 | C | 1 |
| 19 | 0.581855 | C | 1 |
| 12 | 0.683987 | C | 1 |
| 14 | 0.316436 | R | 0 |
| 2  | 0.555545 | C | 1 |

|    |          |   |   |
|----|----------|---|---|
| 9  | 0.648752 | E | 1 |
| 12 | 0.683987 | C | 1 |
| 8  | 0.306817 | I | 0 |
| 4  | 0.128298 | C | 1 |
| 8  | 0.306817 | I | 0 |
| 2  | 0.555545 | C | 1 |
| 2  | 0.555545 | C | 1 |
| 19 | 0.329399 | A | 0 |
| 5  | 0.185809 | C | 1 |
| 2  | 0.695716 | N | 0 |
| 15 | 0.685693 | C | 1 |
| 5  | 0.281663 | C | 1 |
| 12 | 0.683987 | C | 1 |
| 20 | 0.294238 | C | 1 |
| 23 | 0.586964 | C | 1 |
| 5  | 0.281663 | C | 1 |
| 19 | 0.837881 | C | 1 |
| 23 | 0.586964 | C | 1 |
| 6  | 0.290476 | I | 0 |
| 15 | 0.685693 | C | 1 |
| 9  | 0.648752 | E | 1 |
| 9  | 0.648752 | E | 1 |
| 6  | 0.388341 | A | 0 |
| 15 | 0.685693 | C | 1 |
| 7  | 0.274289 | C | 1 |
| 5  | 0.185809 | C | 1 |
| 2  | 0.695716 | N | 0 |
| 12 | 0.683987 | C | 1 |
| 2  | 0.695716 | N | 0 |
| 12 | 0.653489 | C | 1 |
| 8  | 0.306817 | I | 0 |
| 8  | 0.306817 | I | 0 |
| 12 | 0.546751 | C | 1 |
| 5  | 0.185809 | C | 1 |
| 7  | 0.274289 | C | 1 |
| 15 | 0.685693 | C | 1 |
| 15 | 0.685693 | C | 1 |
| 23 | 0.586964 | C | 1 |
| 8  | 0.306817 | I | 0 |
| 8  | 0.306817 | I | 0 |
| 9  | 0.648752 | E | 1 |
| 23 | 0.586964 | C | 1 |
| 5  | 0.499997 | C | 1 |
| 12 | 0.653489 | C | 1 |
| 2  | 0.555545 | C | 1 |
| 1  | 0.643391 | C | 1 |
| 9  | 0.648752 | E | 1 |
| 7  | 0.274289 | C | 1 |
| 18 | 0.294365 | C | 1 |
| 14 | 0.316436 | R | 0 |
| 15 | 0.685693 | C | 1 |
| 12 | 0.683987 | C | 1 |
| 19 | 0.837881 | C | 1 |
| 2  | 0.695716 | N | 0 |

|               |   |
|---------------|---|
| 8 0.306817 I  | 0 |
| 15 0.685693 C | 1 |
| 7 0.274289 C  | 1 |
| 20 0.294238 C | 1 |
| 12 0.546751 C | 1 |
| 8 0.306817 I  | 0 |
| 18 0.294365 C | 1 |
| 23 0.586964 C | 1 |
| 6 0.388341 A  | 0 |
| 2 0.167517 C  | 1 |
| 14 0.316436 R | 0 |
| 19 0.581855 C | 1 |
| 12 0.546751 C | 1 |
| 15 0.685693 C | 1 |
| 6 0.290476 I  | 0 |
| 5 0.185809 C  | 1 |
| 15 0.685693 C | 1 |
| 19 0.837881 C | 1 |
| 15 0.685693 C | 1 |
| 7 0.274289 C  | 1 |
| 7 0.274289 C  | 1 |
| 7 0.274289 C  | 1 |
| 2 0.555545 C  | 1 |
| 7 0.274289 C  | 1 |
| 6 0.290476 I  | 0 |
| 6 0.290476 I  | 0 |
| 15 0.685693 C | 1 |
| 20 0.294238 C | 1 |
| 20 0.294238 C | 1 |
| 20 0.294238 C | 1 |
| 7 0.274289 C  | 1 |
| 23 0.294113 C | 1 |
| 15 0.453801 C | 1 |
| 15 0.453801 C | 1 |
| 15 0.453801 C | 1 |
| 15 0.453801 C | 1 |
| 15 0.453801 C | 1 |
| 15 0.453801 C | 1 |
| 23 0.294113 C | 1 |
| 23 0.294113 C | 1 |
| 22 0.347812 C | 1 |
| 22 0.347812 C | 1 |
| 22 0.347812 C | 1 |
| 4 0.561903 N  | 0 |
| 4 0.561903 N  | 0 |
| 20 0.408188 C | 1 |
| 17 0.136864 C | 1 |
| 4 0.561903 N  | 0 |
| 4 0.404985 C  | 1 |
| 20 0.408188 C | 1 |
| 20 0.408188 C | 1 |
| 4 0.561903 N  | 0 |
| 17 0.136864 C | 1 |
| 4 0.404985 C  | 1 |

|    |          |   |   |
|----|----------|---|---|
| 4  | 0.404985 | C | 1 |
| 4  | 0.404985 | C | 1 |
| 4  | 0.404985 | C | 1 |
| 4  | 0.404985 | C | 1 |
| 20 | 0.408188 | C | 1 |
| 4  | 0.404985 | C | 1 |
| 4  | 0.561903 | N | 0 |
| 20 | 0.408188 | C | 1 |
| 4  | 0.561903 | N | 0 |
| 17 | 0.136864 | C | 1 |
| 4  | 0.561903 | N | 0 |
| 20 | 0.408188 | C | 1 |
| 4  | 0.561903 | N | 0 |
| 17 | 0.136864 | C | 1 |
| 22 | 0.911725 | E | 1 |
| 22 | 0.911725 | E | 1 |
| 19 | 0.267287 | E | 1 |
| 23 | 0.448732 | C | 1 |
| 23 | 0.63935  | C | 1 |
| 19 | 0.267287 | E | 1 |
| 2  | 0.336016 | C | 1 |
| 6  | 0.370047 | C | 1 |
| 18 | 0.58033  | C | 1 |
| 16 | 0.221702 | I | 0 |
| 16 | 0.221702 | I | 0 |
| 17 | 0.351316 | C | 1 |
| 6  | 0.533074 | C | 1 |
| 22 | 0.911725 | E | 1 |
| 20 | 0.838967 | D | 1 |
| 19 | 0.267287 | E | 1 |
| 4  | 0.152067 | C | 1 |
| 14 | 0.261601 | A | 0 |
| 20 | 0.404805 | I | 0 |
| 22 | 0.911725 | E | 1 |
| 22 | 0.911725 | E | 1 |
| 16 | 0.221702 | I | 0 |
| 17 | 0.351316 | C | 1 |
| 20 | 0.838967 | D | 1 |
| 6  | 0.533074 | C | 1 |
| 17 | 0.351316 | C | 1 |
| 17 | 0.351316 | C | 1 |
| 16 | 0.643193 | C | 1 |
| 19 | 0.267287 | E | 1 |
| 2  | 0.336016 | C | 1 |
| 4  | 0.152067 | C | 1 |
| 20 | 0.838967 | D | 1 |
| 20 | 0.838967 | D | 1 |
| 6  | 0.370047 | C | 1 |
| 16 | 0.643193 | C | 1 |
| 22 | 0.911725 | E | 1 |
| 1  | 0.09109  | C | 1 |
| 23 | 0.63935  | C | 1 |
| 1  | 0.09109  | C | 1 |
| 20 | 0.838967 | D | 1 |

|    |          |   |   |
|----|----------|---|---|
| 19 | 0.267287 | E | 1 |
| 23 | 0.448732 | C | 1 |
| 4  | 0.152067 | C | 1 |
| 4  | 0.152067 | C | 1 |
| 23 | 0.448732 | C | 1 |
| 1  | 0.270594 | C | 1 |
| 22 | 0.585464 | F | 0 |
| 1  | 0.270594 | C | 1 |
| 23 | 0.63935  | C | 1 |
| 20 | 0.838967 | D | 1 |
| 2  | 0.336016 | C | 1 |
| 17 | 0.643211 | C | 1 |
| 16 | 0.221702 | I | 0 |
| 23 | 0.448732 | C | 1 |
| 1  | 0.09109  | C | 1 |
| 17 | 0.351316 | C | 1 |
| 2  | 0.336016 | C | 1 |
| 6  | 0.533074 | C | 1 |
| 4  | 0.152067 | C | 1 |
| 22 | 0.911725 | E | 1 |
| 14 | 0.261601 | A | 0 |
| 2  | 0.336016 | C | 1 |
| 16 | 0.221702 | I | 0 |
| 23 | 0.63935  | C | 1 |
| 18 | 0.58033  | C | 1 |
| 6  | 0.370047 | C | 1 |
| 17 | 0.643211 | C | 1 |
| 17 | 0.351316 | C | 1 |
| 6  | 0.533074 | C | 1 |
| 6  | 0.533074 | C | 1 |
| 6  | 0.370047 | C | 1 |
| 16 | 0.643193 | C | 1 |
| 14 | 0.261601 | A | 0 |
| 23 | 0.63935  | C | 1 |
| 22 | 0.585464 | F | 0 |
| 17 | 0.643211 | C | 1 |
| 23 | 0.63935  | C | 1 |
| 6  | 0.533074 | C | 1 |
| 22 | 0.585464 | F | 0 |
| 23 | 0.63935  | C | 1 |
| 16 | 0.221702 | I | 0 |
| 2  | 0.336016 | C | 1 |
| 22 | 0.585464 | F | 0 |
| 2  | 0.336016 | C | 1 |
| 18 | 0.58033  | C | 1 |
| 4  | 0.152067 | C | 1 |
| 22 | 0.585464 | F | 0 |
| 20 | 0.838967 | D | 1 |
| 23 | 0.63935  | C | 1 |
| 18 | 0.58033  | C | 1 |
| 17 | 0.351316 | C | 1 |
| 17 | 0.351316 | C | 1 |
| 18 | 0.58033  | C | 1 |
| 20 | 0.404805 | I | 0 |

|    |          |   |   |
|----|----------|---|---|
| 2  | 0.336016 | C | 1 |
| 4  | 0.152067 | C | 1 |
| 6  | 0.533074 | C | 1 |
| 22 | 0.911725 | E | 1 |
| 18 | 0.58033  | C | 1 |
| 17 | 0.643211 | C | 1 |
| 6  | 0.533074 | C | 1 |
| 1  | 0.270594 | C | 1 |
| 4  | 0.152067 | C | 1 |
| 17 | 0.351316 | C | 1 |
| 23 | 0.448732 | C | 1 |
| 22 | 0.911725 | E | 1 |
| 16 | 0.221702 | I | 0 |
| 20 | 0.838967 | D | 1 |
| 22 | 0.911725 | E | 1 |
| 23 | 0.63935  | C | 1 |
| 6  | 0.370047 | C | 1 |
| 6  | 0.370047 | C | 1 |
| 20 | 0.404805 | I | 0 |
| 22 | 0.911725 | E | 1 |
| 20 | 0.404805 | I | 0 |
| 17 | 0.351316 | C | 1 |
| 20 | 0.838967 | D | 1 |
| 16 | 0.643193 | C | 1 |
| 17 | 0.643211 | C | 1 |
| 6  | 0.533074 | C | 1 |
| 4  | 0.152067 | C | 1 |
| 19 | 0.267287 | E | 1 |
| 2  | 0.336016 | C | 1 |
| 16 | 0.643193 | C | 1 |
| 6  | 0.533074 | C | 1 |
| 22 | 0.585464 | F | 0 |
| 23 | 0.448732 | C | 1 |
| 6  | 0.533074 | C | 1 |
| 6  | 0.533074 | C | 1 |
| 4  | 0.152067 | C | 1 |
| 6  | 0.533074 | C | 1 |
| 22 | 0.911725 | E | 1 |
| 19 | 0.267287 | E | 1 |
| 20 | 0.838967 | D | 1 |
| 23 | 0.448732 | C | 1 |
| 2  | 0.336016 | C | 1 |
| 17 | 0.351316 | C | 1 |
| 22 | 0.911725 | E | 1 |
| 2  | 0.336016 | C | 1 |
| 20 | 0.838967 | D | 1 |
| 2  | 0.336016 | C | 1 |
| 20 | 0.838967 | D | 1 |
| 18 | 0.787845 | C | 1 |
| 13 | 0.644968 | C | 1 |
| 11 | 0.266595 | C | 1 |
| 11 | 0.266595 | C | 1 |
| 11 | 0.266595 | C | 1 |
| 11 | 0.266595 | C | 1 |

|    |          |   |   |
|----|----------|---|---|
| 13 | 0.644968 | C | 1 |
| 12 | 0.569464 | C | 1 |
| 12 | 0.569464 | C | 1 |
| 11 | 0.266595 | C | 1 |
| 13 | 0.644968 | C | 1 |
| 20 | 0.730765 | C | 1 |
| 13 | 0.644968 | C | 1 |
| 2  | 0.091307 | C | 1 |
| 12 | 0.569464 | C | 1 |
| 11 | 0.266595 | C | 1 |
| 2  | 0.091307 | C | 1 |
| 18 | 0.787845 | C | 1 |
| 2  | 0.091307 | C | 1 |
| 20 | 0.730765 | C | 1 |
| 20 | 0.730765 | C | 1 |
| 20 | 0.730765 | C | 1 |
| 20 | 0.730765 | C | 1 |
| 12 | 0.569464 | C | 1 |
| 11 | 0.266595 | C | 1 |
| 13 | 0.644968 | C | 1 |
| 11 | 0.266595 | C | 1 |
| 13 | 0.644968 | C | 1 |
| 18 | 0.787845 | C | 1 |
| 12 | 0.569464 | C | 1 |
| 18 | 0.787845 | C | 1 |
| 13 | 0.644968 | C | 1 |
| 11 | 0.266595 | C | 1 |
| 18 | 0.787845 | C | 1 |
| 2  | 0.091307 | C | 1 |
| 13 | 0.644968 | C | 1 |
| 18 | 0.787845 | C | 1 |
| 13 | 0.644968 | C | 1 |
| 11 | 0.266595 | C | 1 |
| 12 | 0.569464 | C | 1 |
| 11 | 0.266595 | C | 1 |
| 11 | 0.266595 | C | 1 |
| 11 | 0.266595 | C | 1 |
| 11 | 0.266595 | C | 1 |
| 12 | 0.569464 | C | 1 |
| 13 | 0.644968 | C | 1 |
| 17 | 0.852143 | C | 1 |
| 17 | 0.852143 | C | 1 |
| 17 | 0.852143 | C | 1 |
| 17 | 0.852143 | C | 1 |
| 17 | 0.852143 | C | 1 |
| 17 | 0.852143 | C | 1 |
| 15 | 0.243402 | C | 1 |
| 6  | 0.265439 | C | 1 |
| 13 | 0.415307 | C | 1 |
| 15 | 0.243402 | C | 1 |
| 19 | 0.382717 | C | 1 |
| 6  | 0.402741 | C | 1 |
| 2  | 0.270324 | C | 1 |
| 9  | 0.111341 | L | 0 |



|    |          |   |   |
|----|----------|---|---|
| 17 | 0.538364 | C | 1 |
| 5  | 0.259398 | C | 1 |
| 1  | 0.615627 | C | 1 |
| 6  | 0.402741 | C | 1 |
| 6  | 0.237475 | C | 1 |
| 9  | 0.111341 | L | 0 |
| 5  | 0.420099 | C | 1 |
| 5  | 0.420099 | C | 1 |
| 9  | 0.111341 | L | 0 |
| 1  | 0.068284 | C | 1 |
| 6  | 0.237475 | C | 1 |
| 6  | 0.237475 | C | 1 |
| 2  | 0.107669 | C | 1 |
| 5  | 0.420099 | C | 1 |
| 5  | 0.54556  | C | 1 |
| 4  | 0.176424 | C | 1 |
| 15 | 0.243402 | C | 1 |
| 17 | 0.538364 | C | 1 |
| 4  | 0.176424 | C | 1 |
| 6  | 0.402741 | C | 1 |
| 1  | 0.615627 | C | 1 |
| 5  | 0.54556  | C | 1 |
| 4  | 0.176424 | C | 1 |
| 5  | 0.420099 | C | 1 |
| 17 | 0.538364 | C | 1 |
| 15 | 0.243402 | C | 1 |
| 1  | 0.068284 | C | 1 |
| 15 | 0.243402 | C | 1 |
| 1  | 0.587711 | C | 1 |
| 5  | 0.259398 | C | 1 |
| 9  | 0.402198 | C | 1 |
| 4  | 0.176424 | C | 1 |
| 9  | 0.402198 | C | 1 |
| 9  | 0.173494 | C | 1 |
| 5  | 0.54556  | C | 1 |
| 5  | 0.54556  | C | 1 |
| 5  | 0.259398 | C | 1 |
| 5  | 0.420099 | C | 1 |
| 19 | 0.382717 | C | 1 |
| 17 | 0.538364 | C | 1 |
| 10 | 0.410205 | C | 1 |
| 15 | 0.243402 | C | 1 |
| 5  | 0.420099 | C | 1 |
| 9  | 0.173494 | C | 1 |
| 1  | 0.587711 | C | 1 |
| 9  | 0.402198 | C | 1 |
| 4  | 0.176424 | C | 1 |
| 1  | 0.587711 | C | 1 |
| 9  | 0.173494 | C | 1 |
| 17 | 0.538364 | C | 1 |
| 5  | 0.420099 | C | 1 |
| 1  | 0.587711 | C | 1 |
| 6  | 0.237475 | C | 1 |
| 17 | 0.732025 | K | 1 |

|    |          |   |   |
|----|----------|---|---|
| 13 | 0.415307 | C | 1 |
| 16 | 0.44265  | C | 1 |
| 6  | 0.402741 | C | 1 |
| 19 | 0.382717 | C | 1 |
| 17 | 0.538364 | C | 1 |
| 5  | 0.420099 | C | 1 |
| 2  | 0.107669 | C | 1 |
| 6  | 0.402741 | C | 1 |
| 1  | 0.615627 | C | 1 |
| 15 | 0.243402 | C | 1 |
| 5  | 0.54556  | C | 1 |
| 8  | 0.334701 | C | 1 |
| 2  | 0.270324 | C | 1 |
| 15 | 0.243402 | C | 1 |
| 15 | 0.243402 | C | 1 |
| 2  | 0.270324 | C | 1 |
| 5  | 0.259398 | C | 1 |
| 6  | 0.265439 | C | 1 |
| 10 | 0.410205 | C | 1 |
| 15 | 0.243402 | C | 1 |
| 17 | 0.732025 | K | 1 |
| 17 | 0.732025 | K | 1 |
| 16 | 0.44265  | C | 1 |
| 1  | 0.615627 | C | 1 |
| 6  | 0.402741 | C | 1 |
| 19 | 0.382717 | C | 1 |
| 1  | 0.587711 | C | 1 |
| 9  | 0.111341 | L | 0 |
| 10 | 0.410205 | C | 1 |
| 15 | 0.243402 | C | 1 |
| 6  | 0.237475 | C | 1 |
| 5  | 0.259398 | C | 1 |
| 2  | 0.270324 | C | 1 |
| 5  | 0.54556  | C | 1 |
| 2  | 0.107669 | C | 1 |
| 16 | 0.44265  | C | 1 |
| 16 | 0.44265  | C | 1 |
| 15 | 0.243402 | C | 1 |
| 17 | 0.538364 | C | 1 |
| 8  | 0.334701 | C | 1 |
| 6  | 0.237475 | C | 1 |
| 1  | 0.615627 | C | 1 |
| 8  | 0.334701 | C | 1 |
| 6  | 0.265439 | C | 1 |
| 5  | 0.420099 | C | 1 |
| 1  | 0.068284 | C | 1 |
| 8  | 0.334701 | C | 1 |
| 5  | 0.54556  | C | 1 |
| 17 | 0.538364 | C | 1 |
| 5  | 0.420099 | C | 1 |
| 9  | 0.402198 | C | 1 |
| 6  | 0.265439 | C | 1 |
| 8  | 0.334701 | C | 1 |
| 5  | 0.54556  | C | 1 |

|    |          |   |   |
|----|----------|---|---|
| 6  | 0.265439 | C | 1 |
| 5  | 0.420099 | C | 1 |
| 9  | 0.111341 | L | 0 |
| 6  | 0.237475 | C | 1 |
| 16 | 0.44265  | C | 1 |
| 5  | 0.54556  | C | 1 |
| 9  | 0.402198 | C | 1 |
| 6  | 0.402741 | C | 1 |
| 9  | 0.111341 | L | 0 |
| 6  | 0.402741 | C | 1 |
| 16 | 0.44265  | C | 1 |
| 1  | 0.587711 | C | 1 |
| 10 | 0.410205 | C | 1 |
| 6  | 0.265439 | C | 1 |
| 9  | 0.173494 | C | 1 |
| 9  | 0.402198 | C | 1 |
| 9  | 0.173494 | C | 1 |
| 2  | 0.270324 | C | 1 |
| 15 | 0.243402 | C | 1 |
| 6  | 0.402741 | C | 1 |
| 16 | 0.44265  | C | 1 |
| 10 | 0.410205 | C | 1 |
| 5  | 0.420099 | C | 1 |
| 13 | 0.415307 | C | 1 |
| 19 | 0.382717 | C | 1 |
| 15 | 0.243402 | C | 1 |
| 9  | 0.402198 | C | 1 |
| 10 | 0.410205 | C | 1 |
| 9  | 0.402198 | C | 1 |
| 5  | 0.420099 | C | 1 |
| 15 | 0.243402 | C | 1 |
| 16 | 0.757306 | C | 1 |
| 16 | 0.757306 | C | 1 |
| 16 | 0.757306 | C | 1 |
| 16 | 0.757306 | C | 1 |
| 9  | 0.509407 | C | 1 |
| 9  | 0.509407 | C | 1 |
| 16 | 0.757306 | C | 1 |
| 9  | 0.509407 | C | 1 |
| 9  | 0.509407 | C | 1 |
| 9  | 0.509407 | C | 1 |
| 5  | 0.33348  | C | 1 |
| 5  | 0.33348  | C | 1 |
| 5  | 0.33348  | C | 1 |
| 5  | 0.33348  | C | 1 |
| 5  | 0.33348  | C | 1 |
| 5  | 0.33348  | C | 1 |
| 5  | 0.33348  | C | 1 |
| 5  | 0.33348  | C | 1 |
| 5  | 0.33348  | C | 1 |
| 5  | 0.33348  | C | 1 |
| 5  | 0.33348  | C | 1 |
| 16 | 0.217935 | C | 1 |
| 16 | 0.217935 | C | 1 |
| 16 | 0.217935 | C | 1 |

|    |          |   |   |
|----|----------|---|---|
| 9  | 0.282894 | C | 1 |
| 9  | 0.282894 | C | 1 |
| 1  | 0.286855 | A | 0 |
| 9  | 0.282894 | C | 1 |
| 9  | 0.282894 | C | 1 |
| 9  | 0.282894 | C | 1 |
| 9  | 0.282894 | C | 1 |
| 1  | 0.286855 | A | 0 |
| 9  | 0.282894 | C | 1 |
| 1  | 0.286855 | A | 0 |
| 9  | 0.282894 | C | 1 |
| 9  | 0.282894 | C | 1 |
| 1  | 0.286855 | A | 0 |
| 1  | 0.286855 | A | 0 |
| 1  | 0.286855 | A | 0 |
| 9  | 0.282894 | C | 1 |
| 1  | 0.286855 | A | 0 |
| 19 | 0.20797  | C | 1 |
| 16 | 0.732405 | C | 1 |
| 5  | 0.402231 | F | 0 |
| 18 | 0.85854  | C | 1 |
| 19 | 0.20797  | C | 1 |
| 18 | 0.681353 | C | 1 |
| 13 | 0.834187 | F | 0 |
| 16 | 0.640298 | B | 1 |
| 18 | 0.681353 | C | 1 |
| 12 | 0.156899 | C | 1 |
| 16 | 0.640298 | B | 1 |
| 12 | 0.156899 | C | 1 |
| 16 | 0.761326 | B | 1 |
| 19 | 0.20797  | C | 1 |
| 19 | 0.20797  | C | 1 |
| 16 | 0.732405 | C | 1 |
| 18 | 0.85854  | C | 1 |
| 13 | 0.834187 | F | 0 |
| 12 | 0.156899 | C | 1 |
| 16 | 0.761326 | B | 1 |
| 16 | 0.761326 | B | 1 |
| 20 | 0.588208 | C | 1 |
| 19 | 0.20797  | C | 1 |
| 13 | 0.834187 | F | 0 |
| 20 | 0.588208 | C | 1 |
| 13 | 0.834187 | F | 0 |
| 5  | 0.402231 | F | 0 |
| 16 | 0.761326 | B | 1 |
| 13 | 0.834187 | F | 0 |
| 19 | 0.20797  | C | 1 |
| 13 | 0.834187 | F | 0 |
| 18 | 0.681353 | C | 1 |
| 5  | 0.402231 | F | 0 |
| 19 | 0.20797  | C | 1 |
| 18 | 0.681353 | C | 1 |
| 5  | 0.402231 | F | 0 |
| 19 | 0.20797  | C | 1 |

|    |          |   |   |
|----|----------|---|---|
| 19 | 0.20797  | C | 1 |
| 18 | 0.85854  | C | 1 |
| 13 | 0.834187 | F | 0 |
| 20 | 0.588208 | C | 1 |
| 13 | 0.834187 | F | 0 |
| 16 | 0.732405 | C | 1 |
| 12 | 0.156899 | C | 1 |
| 16 | 0.761326 | B | 1 |
| 1  | 0.400671 | C | 1 |
| 12 | 0.156899 | C | 1 |
| 19 | 0.20797  | C | 1 |
| 12 | 0.156899 | C | 1 |
| 18 | 0.85854  | C | 1 |
| 18 | 0.85854  | C | 1 |
| 13 | 0.834187 | F | 0 |
| 19 | 0.20797  | C | 1 |
| 13 | 0.834187 | F | 0 |
| 13 | 0.834187 | F | 0 |
| 16 | 0.640298 | B | 1 |
| 20 | 0.588208 | C | 1 |
| 19 | 0.20797  | C | 1 |
| 18 | 0.85854  | C | 1 |
| 5  | 0.402231 | F | 0 |
| 13 | 0.834187 | F | 0 |
| 18 | 0.85854  | C | 1 |
| 16 | 0.640298 | B | 1 |
| 16 | 0.640298 | B | 1 |
| 19 | 0.20797  | C | 1 |
| 1  | 0.400671 | C | 1 |
| 18 | 0.85854  | C | 1 |
| 1  | 0.400671 | C | 1 |
| 16 | 0.732405 | C | 1 |
| 13 | 0.834187 | F | 0 |
| 16 | 0.732405 | C | 1 |
| 19 | 0.20797  | C | 1 |
| 18 | 0.681353 | C | 1 |
| 12 | 0.156899 | C | 1 |
| 2  | 0.396658 | C | 1 |
| 2  | 0.396658 | C | 1 |
| 19 | 0.911002 | C | 1 |
| 2  | 0.396658 | C | 1 |
| 19 | 0.911002 | C | 1 |
| 19 | 0.911002 | C | 1 |
| 2  | 0.396658 | C | 1 |
| 19 | 0.911002 | C | 1 |
| 2  | 0.396658 | C | 1 |
| 19 | 0.911002 | C | 1 |
| 2  | 0.396658 | C | 1 |
| 19 | 0.911002 | C | 1 |
| 1  | 0.211663 | C | 1 |
| 1  | 0.211663 | C | 1 |
| 1  | 0.211663 | C | 1 |
| 2  | 0.281934 | C | 1 |
| 9  | 0.346927 | L | 0 |

|    |          |   |   |
|----|----------|---|---|
| 6  | 0.369649 | G | 0 |
| 9  | 0.427965 | C | 1 |
| 18 | 0.641826 | K | 1 |
| 1  | 0.313397 | C | 1 |
| 1  | 0.244024 | C | 1 |
| 5  | 0.804224 | E | 1 |
| 9  | 0.364907 | L | 0 |
| 5  | 0.804224 | E | 1 |
| 9  | 0.364907 | L | 0 |
| 20 | 0.407386 | C | 1 |
| 6  | 0.529447 | C | 1 |
| 18 | 0.46437  | C | 1 |
| 4  | 0.367695 | C | 1 |
| 1  | 0.465143 | C | 1 |
| 4  | 0.107844 | C | 1 |
| 12 | 0.799793 | E | 1 |
| 9  | 0.427965 | C | 1 |
| 9  | 0.364907 | L | 0 |
| 9  | 0.427965 | C | 1 |
| 9  | 0.427965 | C | 1 |
| 9  | 0.440437 | G | 0 |
| 11 | 0.547936 | C | 1 |
| 16 | 0.192427 | C | 1 |
| 9  | 0.440437 | G | 0 |
| 5  | 0.694355 | E | 1 |
| 16 | 0.192427 | C | 1 |
| 2  | 0.281934 | C | 1 |
| 5  | 0.694355 | E | 1 |
| 6  | 0.529447 | C | 1 |
| 16 | 0.192427 | C | 1 |
| 1  | 0.313397 | C | 1 |
| 10 | 0.790311 | E | 1 |
| 11 | 0.547936 | C | 1 |
| 9  | 0.346927 | L | 0 |
| 9  | 0.427965 | C | 1 |
| 7  | 0.087932 | I | 0 |
| 1  | 0.244024 | C | 1 |
| 13 | 0.572383 | C | 1 |
| 18 | 0.46437  | C | 1 |
| 1  | 0.244024 | C | 1 |
| 5  | 0.380796 | C | 1 |
| 12 | 0.148709 | C | 1 |
| 16 | 0.192427 | C | 1 |
| 2  | 0.281934 | C | 1 |
| 23 | 0.628155 | C | 1 |
| 5  | 0.694355 | E | 1 |
| 23 | 0.628155 | C | 1 |
| 5  | 0.404999 | C | 1 |
| 9  | 0.427965 | C | 1 |
| 13 | 0.572383 | C | 1 |
| 13 | 0.572383 | C | 1 |
| 9  | 0.440437 | G | 0 |
| 5  | 0.694355 | E | 1 |
| 6  | 0.60289  | C | 1 |

|    |          |   |   |
|----|----------|---|---|
| 23 | 0.628155 | C | 1 |
| 6  | 0.529447 | C | 1 |
| 6  | 0.068284 | C | 1 |
| 4  | 0.180105 | C | 1 |
| 6  | 0.529447 | C | 1 |
| 1  | 0.313397 | C | 1 |
| 1  | 0.184008 | C | 1 |
| 9  | 0.427965 | C | 1 |
| 4  | 0.180105 | C | 1 |
| 1  | 0.313397 | C | 1 |
| 16 | 0.304882 | C | 1 |
| 9  | 0.364907 | L | 0 |
| 1  | 0.465143 | C | 1 |
| 5  | 0.384826 | C | 1 |
| 1  | 0.465143 | C | 1 |
| 5  | 0.404999 | C | 1 |
| 23 | 0.628155 | C | 1 |
| 12 | 0.799793 | E | 1 |
| 11 | 0.547936 | C | 1 |
| 6  | 0.369649 | G | 0 |
| 5  | 0.384826 | C | 1 |
| 10 | 0.790311 | E | 1 |
| 6  | 0.224913 | C | 1 |
| 12 | 0.148709 | C | 1 |
| 12 | 0.799793 | E | 1 |
| 5  | 0.384826 | C | 1 |
| 6  | 0.369649 | G | 0 |
| 5  | 0.404999 | C | 1 |
| 1  | 0.184008 | C | 1 |
| 20 | 0.407386 | C | 1 |
| 6  | 0.60289  | C | 1 |
| 5  | 0.694355 | E | 1 |
| 5  | 0.404999 | C | 1 |
| 4  | 0.180105 | C | 1 |
| 5  | 0.384826 | C | 1 |
| 23 | 0.628155 | C | 1 |
| 4  | 0.180105 | C | 1 |
| 13 | 0.572383 | C | 1 |
| 7  | 0.087932 | I | 0 |
| 10 | 0.790311 | E | 1 |
| 1  | 0.244024 | C | 1 |
| 11 | 0.547936 | C | 1 |
| 18 | 0.641826 | K | 1 |
| 1  | 0.184008 | C | 1 |
| 1  | 0.244024 | C | 1 |
| 6  | 0.60289  | C | 1 |
| 9  | 0.346927 | L | 0 |
| 11 | 0.547936 | C | 1 |
| 5  | 0.694355 | E | 1 |
| 5  | 0.384826 | C | 1 |
| 7  | 0.087932 | I | 0 |
| 12 | 0.799793 | E | 1 |
| 6  | 0.529447 | C | 1 |
| 7  | 0.087932 | I | 0 |

|    |          |   |   |
|----|----------|---|---|
| 11 | 0.547936 | C | 1 |
| 12 | 0.148709 | C | 1 |
| 4  | 0.367695 | C | 1 |
| 6  | 0.068284 | C | 1 |
| 2  | 0.585123 | C | 1 |
| 4  | 0.107844 | C | 1 |
| 4  | 0.107844 | C | 1 |
| 11 | 0.547936 | C | 1 |
| 5  | 0.804224 | E | 1 |
| 9  | 0.524986 | C | 1 |
| 9  | 0.346927 | L | 0 |
| 6  | 0.60289  | C | 1 |
| 1  | 0.313397 | C | 1 |
| 5  | 0.804224 | E | 1 |
| 10 | 0.790311 | E | 1 |
| 1  | 0.465143 | C | 1 |
| 5  | 0.404999 | C | 1 |
| 23 | 0.628155 | C | 1 |
| 9  | 0.440437 | G | 0 |
| 11 | 0.547936 | C | 1 |
| 6  | 0.068284 | C | 1 |
| 16 | 0.192427 | C | 1 |
| 16 | 0.192427 | C | 1 |
| 16 | 0.192427 | C | 1 |
| 18 | 0.641826 | K | 1 |
| 12 | 0.799793 | E | 1 |
| 23 | 0.628155 | C | 1 |
| 6  | 0.60289  | C | 1 |
| 11 | 0.547936 | C | 1 |
| 2  | 0.585123 | C | 1 |
| 1  | 0.282483 | C | 1 |
| 9  | 0.524986 | C | 1 |
| 1  | 0.244024 | C | 1 |
| 7  | 0.087932 | I | 0 |
| 1  | 0.184008 | C | 1 |
| 4  | 0.180105 | C | 1 |
| 6  | 0.369649 | G | 0 |
| 5  | 0.380796 | C | 1 |
| 1  | 0.313397 | C | 1 |
| 1  | 0.465143 | C | 1 |
| 1  | 0.313397 | C | 1 |
| 2  | 0.281934 | C | 1 |
| 20 | 0.407386 | C | 1 |
| 4  | 0.180105 | C | 1 |
| 5  | 0.694355 | E | 1 |
| 9  | 0.364907 | L | 0 |
| 20 | 0.407386 | C | 1 |
| 18 | 0.641826 | K | 1 |
| 5  | 0.804224 | E | 1 |
| 6  | 0.529447 | C | 1 |
| 6  | 0.529447 | C | 1 |
| 5  | 0.694355 | E | 1 |
| 6  | 0.529447 | C | 1 |
| 9  | 0.524986 | C | 1 |



|    |          |   |   |
|----|----------|---|---|
| 11 | 0.547936 | C | 1 |
| 6  | 0.529447 | C | 1 |
| 6  | 0.369649 | G | 0 |
| 4  | 0.180105 | C | 1 |
| 1  | 0.313397 | C | 1 |
| 1  | 0.184008 | C | 1 |
| 1  | 0.313397 | C | 1 |
| 9  | 0.427965 | C | 1 |
| 20 | 0.407386 | C | 1 |
| 4  | 0.180105 | C | 1 |
| 13 | 0.572383 | C | 1 |
| 4  | 0.180105 | C | 1 |
| 12 | 0.148709 | C | 1 |
| 6  | 0.529447 | C | 1 |
| 4  | 0.107844 | C | 1 |
| 5  | 0.804224 | E | 1 |
| 16 | 0.304882 | C | 1 |
| 16 | 0.192427 | C | 1 |
| 1  | 0.313397 | C | 1 |
| 5  | 0.804224 | E | 1 |
| 12 | 0.799793 | E | 1 |
| 1  | 0.184008 | C | 1 |
| 18 | 0.641826 | K | 1 |
| 9  | 0.524986 | C | 1 |
| 9  | 0.427965 | C | 1 |
| 4  | 0.367695 | C | 1 |
| 16 | 0.192427 | C | 1 |
| 5  | 0.804224 | E | 1 |
| 6  | 0.068284 | C | 1 |
| 16 | 0.192427 | C | 1 |
| 5  | 0.694355 | E | 1 |
| 16 | 0.192427 | C | 1 |
| 5  | 0.380796 | C | 1 |
| 11 | 0.547936 | C | 1 |
| 4  | 0.367695 | C | 1 |
| 1  | 0.184008 | C | 1 |
| 12 | 0.148709 | C | 1 |
| 5  | 0.380796 | C | 1 |
| 13 | 0.572383 | C | 1 |
| 1  | 0.465143 | C | 1 |
| 9  | 0.440437 | G | 0 |
| 12 | 0.148709 | C | 1 |
| 1  | 0.282483 | C | 1 |
| 4  | 0.180105 | C | 1 |
| 5  | 0.804224 | E | 1 |
| 18 | 0.46437  | C | 1 |
| 18 | 0.641826 | K | 1 |
| 1  | 0.244024 | C | 1 |
| 1  | 0.244024 | C | 1 |
| 1  | 0.465143 | C | 1 |
| 18 | 0.46437  | C | 1 |
| 10 | 0.790311 | E | 1 |
| 1  | 0.20114  | C | 1 |
| 11 | 0.547936 | C | 1 |

|    |          |   |   |
|----|----------|---|---|
| 12 | 0.799793 | E | 1 |
| 1  | 0.313397 | C | 1 |
| 9  | 0.440437 | G | 0 |
| 5  | 0.384826 | C | 1 |
| 9  | 0.427965 | C | 1 |
| 5  | 0.804224 | E | 1 |
| 16 | 0.192427 | C | 1 |
| 1  | 0.465143 | C | 1 |
| 5  | 0.380796 | C | 1 |
| 6  | 0.529447 | C | 1 |
| 4  | 0.107844 | C | 1 |
| 20 | 0.407386 | C | 1 |
| 4  | 0.107844 | C | 1 |
| 4  | 0.367695 | C | 1 |
| 6  | 0.224913 | C | 1 |
| 16 | 0.192427 | C | 1 |
| 20 | 0.407386 | C | 1 |
| 9  | 0.524986 | C | 1 |
| 20 | 0.407386 | C | 1 |
| 9  | 0.524986 | C | 1 |
| 1  | 0.20114  | C | 1 |
| 9  | 0.440437 | G | 0 |
| 9  | 0.440437 | G | 0 |
| 16 | 0.192427 | C | 1 |
| 11 | 0.547936 | C | 1 |
| 20 | 0.407386 | C | 1 |
| 9  | 0.346927 | L | 0 |
| 5  | 0.694355 | E | 1 |
| 6  | 0.529447 | C | 1 |
| 5  | 0.804224 | E | 1 |
| 16 | 0.192427 | C | 1 |
| 11 | 0.547936 | C | 1 |
| 9  | 0.524986 | C | 1 |
| 4  | 0.367695 | C | 1 |
| 23 | 0.628155 | C | 1 |
| 1  | 0.465143 | C | 1 |
| 1  | 0.20114  | C | 1 |
| 6  | 0.224913 | C | 1 |
| 11 | 0.547936 | C | 1 |
| 20 | 0.407386 | C | 1 |
| 1  | 0.313397 | C | 1 |
| 4  | 0.107844 | C | 1 |
| 1  | 0.184008 | C | 1 |
| 6  | 0.369649 | G | 0 |
| 16 | 0.192427 | C | 1 |
| 1  | 0.184008 | C | 1 |
| 6  | 0.068284 | C | 1 |
| 2  | 0.585123 | C | 1 |
| 18 | 0.641826 | K | 1 |
| 12 | 0.799793 | E | 1 |
| 6  | 0.529447 | C | 1 |
| 6  | 0.224913 | C | 1 |
| 6  | 0.224913 | C | 1 |
| 6  | 0.529447 | C | 1 |

|    |          |   |   |
|----|----------|---|---|
| 12 | 0.148709 | C | 1 |
| 16 | 0.192427 | C | 1 |
| 9  | 0.346927 | L | 0 |
| 12 | 0.148709 | C | 1 |
| 18 | 0.46437  | C | 1 |
| 18 | 0.46437  | C | 1 |
| 18 | 0.46437  | C | 1 |
| 20 | 0.407386 | C | 1 |
| 2  | 0.585123 | C | 1 |
| 18 | 0.641826 | K | 1 |
| 4  | 0.367695 | C | 1 |
| 23 | 0.628155 | C | 1 |
| 18 | 0.641826 | K | 1 |
| 1  | 0.465143 | C | 1 |
| 1  | 0.282483 | C | 1 |
| 2  | 0.585123 | C | 1 |
| 16 | 0.192427 | C | 1 |
| 5  | 0.404999 | C | 1 |
| 20 | 0.407386 | C | 1 |
| 16 | 0.304882 | C | 1 |
| 6  | 0.068284 | C | 1 |
| 16 | 0.192427 | C | 1 |
| 9  | 0.364907 | L | 0 |
| 12 | 0.148709 | C | 1 |
| 5  | 0.404999 | C | 1 |
| 16 | 0.304882 | C | 1 |
| 1  | 0.184008 | C | 1 |
| 9  | 0.364907 | L | 0 |
| 16 | 0.192427 | C | 1 |
| 2  | 0.281934 | C | 1 |
| 7  | 0.087932 | I | 0 |
| 7  | 0.087932 | I | 0 |
| 20 | 0.407386 | C | 1 |
| 16 | 0.304882 | C | 1 |
| 16 | 0.304882 | C | 1 |
| 16 | 0.304882 | C | 1 |
| 20 | 0.407386 | C | 1 |
| 1  | 0.184008 | C | 1 |
| 12 | 0.148709 | C | 1 |
| 16 | 0.192427 | C | 1 |
| 5  | 0.694355 | E | 1 |
| 12 | 0.148709 | C | 1 |
| 6  | 0.56643  | C | 1 |
| 18 | 0.389474 | C | 1 |
| 18 | 0.389474 | C | 1 |
| 18 | 0.389474 | C | 1 |
| 6  | 0.56643  | C | 1 |
| 18 | 0.389474 | C | 1 |
| 6  | 0.56643  | C | 1 |
| 6  | 0.56643  | C | 1 |
| 18 | 0.389474 | C | 1 |
| 6  | 0.56643  | C | 1 |
| 6  | 0.56643  | C | 1 |
| 6  | 0.56643  | C | 1 |

|    |          |   |   |
|----|----------|---|---|
| 6  | 0.56643  | C | 1 |
| 6  | 0.56643  | C | 1 |
| 18 | 0.389474 | C | 1 |
| 18 | 0.389474 | C | 1 |
| 18 | 0.389474 | C | 1 |
| 18 | 0.389474 | C | 1 |
| 6  | 0.56643  | C | 1 |
| 15 | 0.829338 | C | 1 |
| 17 | 0.18921  | D | 1 |
| 5  | 0.553429 | C | 1 |
| 17 | 0.18921  | D | 1 |
| 17 | 0.18921  | D | 1 |
| 15 | 0.829338 | C | 1 |
| 17 | 0.18921  | D | 1 |
| 17 | 0.18921  | D | 1 |
| 17 | 0.18921  | D | 1 |
| 15 | 0.829338 | C | 1 |
| 5  | 0.553429 | C | 1 |
| 17 | 0.18921  | D | 1 |
| 5  | 0.553429 | C | 1 |
| 5  | 0.553429 | C | 1 |
| 5  | 0.553429 | C | 1 |
| 5  | 0.553429 | C | 1 |
| 5  | 0.553429 | C | 1 |
| 5  | 0.553429 | C | 1 |
| 5  | 0.553429 | C | 1 |
| 18 | 0.635131 | N | 0 |
| 17 | 0.689035 | C | 1 |
| 16 | 0.483932 | C | 1 |
| 20 | 0.828879 | C | 1 |
| 17 | 0.689035 | C | 1 |
| 20 | 0.828879 | C | 1 |
| 17 | 0.689035 | C | 1 |
| 16 | 0.483932 | C | 1 |
| 18 | 0.635131 | N | 0 |
| 18 | 0.635131 | N | 0 |
| 18 | 0.635131 | N | 0 |
| 17 | 0.689035 | C | 1 |
| 20 | 0.828879 | C | 1 |
| 17 | 0.689035 | C | 1 |
| 18 | 0.635131 | N | 0 |
| 16 | 0.483932 | C | 1 |
| 16 | 0.483932 | C | 1 |
| 16 | 0.483932 | C | 1 |
| 16 | 0.483932 | C | 1 |
| 17 | 0.689035 | C | 1 |
| 17 | 0.689035 | C | 1 |
| 17 | 0.689035 | C | 1 |
| 17 | 0.689035 | C | 1 |
| 16 | 0.483932 | C | 1 |
| 18 | 0.635131 | N | 0 |
| 17 | 0.689035 | C | 1 |
| 16 | 0.483932 | C | 1 |

|    |          |   |   |
|----|----------|---|---|
| 20 | 0.828879 | C | 1 |
| 20 | 0.828879 | C | 1 |
| 18 | 0.635131 | N | 0 |
| 20 | 0.828879 | C | 1 |
| 20 | 0.828879 | C | 1 |
| 17 | 0.689035 | C | 1 |
| 16 | 0.483932 | C | 1 |
| 18 | 0.635131 | N | 0 |
| 18 | 0.635131 | N | 0 |
| 18 | 0.635131 | N | 0 |
| 20 | 0.828879 | C | 1 |
| 20 | 0.828879 | C | 1 |
| 20 | 0.828879 | C | 1 |
| 17 | 0.689035 | C | 1 |
| 18 | 0.635131 | N | 0 |
| 20 | 0.828879 | C | 1 |
| 18 | 0.635131 | N | 0 |
| 17 | 0.689035 | C | 1 |
| 16 | 0.483932 | C | 1 |
| 18 | 0.635131 | N | 0 |
| 9  | 0.507545 | C | 1 |
| 6  | 0.382908 | C | 1 |
| 6  | 0.382908 | C | 1 |
| 9  | 0.507545 | C | 1 |
| 6  | 0.382908 | C | 1 |
| 6  | 0.382908 | C | 1 |
| 6  | 0.382908 | C | 1 |
| 6  | 0.382908 | C | 1 |
| 6  | 0.382908 | C | 1 |
| 9  | 0.507545 | C | 1 |
| 9  | 0.507545 | C | 1 |
| 9  | 0.507545 | C | 1 |
| 6  | 0.382908 | C | 1 |
| 9  | 0.507545 | C | 1 |
| 9  | 0.507545 | C | 1 |
| 9  | 0.507545 | C | 1 |
| 6  | 0.382908 | C | 1 |
| 9  | 0.507545 | C | 1 |
| 6  | 0.382908 | C | 1 |
| 9  | 0.507545 | C | 1 |
| 22 | 0.457936 | C | 1 |
| 18 | 0.551825 | C | 1 |
| 22 | 0.457936 | C | 1 |
| 22 | 0.457936 | C | 1 |
| 22 | 0.457936 | C | 1 |
| 18 | 0.551825 | C | 1 |
| 18 | 0.551825 | C | 1 |
| 14 | 0.323942 | C | 1 |
| 14 | 0.461661 | C | 1 |
| 18 | 0.551825 | C | 1 |
| 14 | 0.461661 | C | 1 |
| 18 | 0.551825 | C | 1 |
| 14 | 0.323942 | C | 1 |
| 14 | 0.323942 | C | 1 |

|    |          |   |   |
|----|----------|---|---|
| 18 | 0.551825 | C | 1 |
| 18 | 0.551825 | C | 1 |
| 14 | 0.461661 | C | 1 |
| 18 | 0.551825 | C | 1 |
| 22 | 0.457936 | C | 1 |
| 22 | 0.457936 | C | 1 |
| 18 | 0.551825 | C | 1 |
| 22 | 0.457936 | C | 1 |
| 18 | 0.551825 | C | 1 |
| 14 | 0.323942 | C | 1 |
| 14 | 0.323942 | C | 1 |
| 22 | 0.457936 | C | 1 |
| 14 | 0.461661 | C | 1 |
| 14 | 0.461661 | C | 1 |
| 18 | 0.551825 | C | 1 |
| 14 | 0.461661 | C | 1 |
| 14 | 0.461661 | C | 1 |
| 18 | 0.551825 | C | 1 |
| 22 | 0.457936 | C | 1 |
| 18 | 0.441631 | C | 1 |
| 18 | 0.441631 | C | 1 |
| 1  | 0.212217 | C | 1 |
| 8  | 0.187203 | C | 1 |
| 1  | 0.288775 | C | 1 |
| 18 | 0.441631 | C | 1 |
| 1  | 0.466234 | C | 1 |
| 8  | 0.187203 | C | 1 |
| 8  | 0.187203 | C | 1 |
| 1  | 0.466234 | C | 1 |
| 1  | 0.288775 | C | 1 |
| 1  | 0.288775 | C | 1 |
| 8  | 0.187203 | C | 1 |
| 8  | 0.187203 | C | 1 |
| 1  | 0.288775 | C | 1 |
| 18 | 0.441631 | C | 1 |
| 1  | 0.288775 | C | 1 |
| 8  | 0.187203 | C | 1 |
| 8  | 0.187203 | C | 1 |
| 1  | 0.212217 | C | 1 |
| 1  | 0.466234 | C | 1 |
| 18 | 0.441631 | C | 1 |
| 18 | 0.441631 | C | 1 |
| 8  | 0.187203 | C | 1 |
| 8  | 0.187203 | C | 1 |
| 1  | 0.288775 | C | 1 |
| 8  | 0.187203 | C | 1 |
| 18 | 0.441631 | C | 1 |
| 8  | 0.187203 | C | 1 |
| 8  | 0.187203 | C | 1 |
| 18 | 0.441631 | C | 1 |
| 1  | 0.212217 | C | 1 |
| 8  | 0.187203 | C | 1 |
| 1  | 0.212217 | C | 1 |
| 8  | 0.187203 | C | 1 |

|               |   |
|---------------|---|
| 8 0.187203 C  | 1 |
| 8 0.187203 C  | 1 |
| 1 0.212217 C  | 1 |
| 18 0.441631 C | 1 |
| 18 0.441631 C | 1 |
| 18 0.441631 C | 1 |
| 18 0.441631 C | 1 |
| 18 0.441631 C | 1 |
| 8 0.187203 C  | 1 |
| 1 0.212217 C  | 1 |
| 18 0.441631 C | 1 |
| 5 0.200516 C  | 1 |
| 5 0.285469 C  | 1 |
| 7 0.329014 C  | 1 |
| 5 0.200516 C  | 1 |
| 7 0.329014 C  | 1 |
| 5 0.200516 C  | 1 |
| 5 0.285469 C  | 1 |
| 7 0.329014 C  | 1 |
| 5 0.200516 C  | 1 |
| 5 0.285469 C  | 1 |
| 5 0.200516 C  | 1 |
| 7 0.329014 C  | 1 |
| 7 0.329014 C  | 1 |
| 7 0.159663 C  | 1 |
| 19 0.286479 C | 1 |
| 17 0.491163 C | 1 |
| 5 0.222453 N  | 0 |
| 17 0.491163 C | 1 |
| 12 0.630813 C | 1 |
| 17 0.491163 C | 1 |
| 5 0.222453 N  | 0 |
| 17 0.491163 C | 1 |
| 5 0.222453 N  | 0 |
| 5 0.222453 N  | 0 |
| 12 0.630813 C | 1 |
| 17 0.491163 C | 1 |
| 5 0.222453 N  | 0 |
| 19 0.286479 C | 1 |
| 12 0.630813 C | 1 |
| 7 0.159663 C  | 1 |
| 17 0.491163 C | 1 |
| 12 0.630813 C | 1 |
| 17 0.491163 C | 1 |
| 7 0.159663 C  | 1 |
| 17 0.491163 C | 1 |
| 17 0.491163 C | 1 |
| 12 0.630813 C | 1 |
| 17 0.491163 C | 1 |
| 17 0.491163 C | 1 |
| 12 0.630813 C | 1 |
| 17 0.491163 C | 1 |
| 17 0.491163 C | 1 |
| 12 0.630813 C | 1 |
| 12 0.630813 C | 1 |
| 5 0.222453 N  | 0 |
| 19 0.286479 C | 1 |

|    |          |   |   |
|----|----------|---|---|
| 5  | 0.384454 | C | 1 |
| 2  | 0.365928 | C | 1 |
| 7  | 0.676863 | C | 1 |
| 7  | 0.676863 | C | 1 |
| 5  | 0.367879 | N | 0 |
| 1  | 0.266387 | C | 1 |
| 1  | 0.266387 | C | 1 |
| 5  | 0.367879 | N | 0 |
| 5  | 0.493956 | C | 1 |
| 5  | 0.079651 | C | 1 |
| 6  | 0.198424 | C | 1 |
| 14 | 0.584758 | K | 1 |
| 5  | 0.320145 | C | 1 |
| 7  | 0.676863 | C | 1 |
| 5  | 0.367879 | N | 0 |
| 4  | 0.068284 | C | 1 |
| 20 | 0.823054 | F | 0 |
| 5  | 0.234999 | C | 1 |
| 2  | 0.166475 | C | 1 |
| 1  | 0.118165 | C | 1 |
| 2  | 0.166475 | C | 1 |
| 20 | 0.823054 | F | 0 |
| 7  | 0.676863 | C | 1 |
| 1  | 0.266387 | C | 1 |
| 5  | 0.384454 | C | 1 |
| 20 | 0.823054 | F | 0 |
| 5  | 0.079651 | C | 1 |
| 6  | 0.198424 | C | 1 |
| 2  | 0.166475 | C | 1 |
| 1  | 0.266387 | C | 1 |
| 6  | 0.198424 | C | 1 |
| 5  | 0.234999 | C | 1 |
| 1  | 0.266387 | C | 1 |
| 5  | 0.301065 | C | 1 |
| 14 | 0.584758 | K | 1 |
| 20 | 0.823054 | F | 0 |
| 5  | 0.384454 | C | 1 |
| 6  | 0.068284 | C | 1 |
| 6  | 0.068284 | C | 1 |
| 6  | 0.198424 | C | 1 |
| 1  | 0.266387 | C | 1 |
| 20 | 0.823054 | F | 0 |
| 4  | 0.068284 | C | 1 |
| 1  | 0.118165 | C | 1 |
| 20 | 0.823054 | F | 0 |
| 5  | 0.384454 | C | 1 |
| 5  | 0.384454 | C | 1 |
| 2  | 0.365928 | C | 1 |
| 5  | 0.200844 | C | 1 |
| 5  | 0.079651 | C | 1 |
| 14 | 0.584758 | K | 1 |
| 4  | 0.068284 | C | 1 |
| 2  | 0.365928 | C | 1 |
| 5  | 0.367879 | N | 0 |



|    |          |   |   |
|----|----------|---|---|
| 5  | 0.320145 | C | 1 |
| 5  | 0.320145 | C | 1 |
| 2  | 0.166475 | C | 1 |
| 5  | 0.301065 | C | 1 |
| 2  | 0.166475 | C | 1 |
| 14 | 0.584758 | K | 1 |
| 6  | 0.471674 | C | 1 |
| 20 | 0.823054 | F | 0 |
| 5  | 0.384454 | C | 1 |
| 4  | 0.068284 | C | 1 |
| 2  | 0.365928 | C | 1 |
| 5  | 0.320145 | C | 1 |
| 1  | 0.266387 | C | 1 |
| 20 | 0.823054 | F | 0 |
| 7  | 0.676863 | C | 1 |
| 5  | 0.200844 | C | 1 |
| 22 | 0.371122 | C | 1 |
| 14 | 0.584758 | K | 1 |
| 6  | 0.471674 | C | 1 |
| 20 | 0.823054 | F | 0 |
| 5  | 0.234999 | C | 1 |
| 1  | 0.118165 | C | 1 |
| 1  | 0.266387 | C | 1 |
| 20 | 0.823054 | F | 0 |
| 5  | 0.234999 | C | 1 |
| 5  | 0.234999 | C | 1 |
| 6  | 0.471674 | C | 1 |
| 1  | 0.266387 | C | 1 |
| 20 | 0.823054 | F | 0 |
| 20 | 0.823054 | F | 0 |
| 14 | 0.584758 | K | 1 |
| 22 | 0.371122 | C | 1 |
| 6  | 0.471674 | C | 1 |
| 5  | 0.493956 | C | 1 |
| 5  | 0.200844 | C | 1 |
| 20 | 0.823054 | F | 0 |
| 20 | 0.823054 | F | 0 |
| 22 | 0.371122 | C | 1 |
| 2  | 0.166475 | C | 1 |
| 6  | 0.471674 | C | 1 |
| 5  | 0.384454 | C | 1 |
| 1  | 0.118165 | C | 1 |
| 6  | 0.068284 | C | 1 |
| 5  | 0.200844 | C | 1 |
| 14 | 0.584758 | K | 1 |
| 2  | 0.166475 | C | 1 |
| 6  | 0.471674 | C | 1 |
| 20 | 0.823054 | F | 0 |
| 5  | 0.493956 | C | 1 |
| 1  | 0.118165 | C | 1 |
| 5  | 0.301065 | C | 1 |
| 5  | 0.234999 | C | 1 |
| 20 | 0.823054 | F | 0 |
| 20 | 0.823054 | F | 0 |



|    |          |   |   |
|----|----------|---|---|
| 15 | 0.472313 | C | 1 |
| 15 | 0.472313 | C | 1 |
| 22 | 0.712048 | C | 1 |
| 22 | 0.712048 | C | 1 |
| 15 | 0.472313 | C | 1 |
| 15 | 0.472313 | C | 1 |
| 15 | 0.472313 | C | 1 |
| 1  | 0.150133 | C | 1 |
| 5  | 0.207192 | C | 1 |
| 7  | 0.435442 | C | 1 |
| 6  | 0.459453 | C | 1 |
| 11 | 0.529116 | C | 1 |
| 1  | 0.150133 | C | 1 |
| 7  | 0.435442 | C | 1 |
| 9  | 0.134035 | C | 1 |
| 2  | 0.300252 | C | 1 |
| 4  | 0.273704 | I | 0 |
| 4  | 0.525385 | D | 1 |
| 6  | 0.595786 | C | 1 |
| 5  | 0.18654  | C | 1 |
| 6  | 0.217624 | I | 0 |
| 10 | 0.82398  | E | 1 |
| 4  | 0.319325 | C | 1 |
| 5  | 0.123126 | C | 1 |
| 15 | 0.318312 | C | 1 |
| 4  | 0.273704 | I | 0 |
| 4  | 0.453792 | C | 1 |
| 1  | 0.220693 | I | 0 |
| 9  | 0.226635 | C | 1 |
| 4  | 0.364113 | C | 1 |
| 5  | 0.123126 | C | 1 |
| 15 | 0.318312 | C | 1 |
| 10 | 0.331693 | C | 1 |
| 4  | 0.453792 | C | 1 |
| 20 | 0.440197 | I | 0 |
| 4  | 0.428096 | I | 0 |
| 5  | 0.429386 | C | 1 |
| 4  | 0.449324 | B | 1 |
| 9  | 0.255045 | C | 1 |
| 12 | 0.519946 | C | 1 |
| 20 | 0.259251 | C | 1 |
| 15 | 0.318312 | C | 1 |
| 12 | 0.383239 | C | 1 |
| 4  | 0.364113 | C | 1 |
| 6  | 0.339573 | C | 1 |
| 4  | 0.428096 | I | 0 |
| 5  | 0.18654  | C | 1 |
| 7  | 0.435442 | C | 1 |
| 4  | 0.449324 | B | 1 |
| 23 | 0.571952 | C | 1 |
| 12 | 0.327764 | L | 0 |
| 9  | 0.212443 | C | 1 |
| 20 | 0.259251 | C | 1 |
| 1  | 0.498408 | C | 1 |

|    |          |   |   |
|----|----------|---|---|
| 5  | 0.18654  | C | 1 |
| 4  | 0.449324 | B | 1 |
| 9  | 0.190285 | L | 0 |
| 9  | 0.212443 | C | 1 |
| 20 | 0.259251 | C | 1 |
| 4  | 0.319325 | C | 1 |
| 15 | 0.318312 | C | 1 |
| 1  | 0.498408 | C | 1 |
| 5  | 0.252202 | C | 1 |
| 8  | 0.626063 | C | 1 |
| 6  | 0.339573 | C | 1 |
| 1  | 0.220693 | I | 0 |
| 4  | 0.453792 | C | 1 |
| 9  | 0.134035 | C | 1 |
| 23 | 0.774992 | C | 1 |
| 7  | 0.435442 | C | 1 |
| 4  | 0.525385 | D | 1 |
| 18 | 0.679972 | L | 0 |
| 4  | 0.299793 | C | 1 |
| 18 | 0.449772 | G | 0 |
| 2  | 0.247371 | C | 1 |
| 19 | 0.477519 | D | 1 |
| 5  | 0.207192 | C | 1 |
| 6  | 0.217624 | I | 0 |
| 12 | 0.519946 | C | 1 |
| 12 | 0.519946 | C | 1 |
| 7  | 0.350845 | C | 1 |
| 15 | 0.318312 | C | 1 |
| 11 | 0.529116 | C | 1 |
| 1  | 0.212017 | C | 1 |
| 6  | 0.595786 | C | 1 |
| 6  | 0.538806 | C | 1 |
| 12 | 0.327764 | L | 0 |
| 4  | 0.449324 | B | 1 |
| 5  | 0.123126 | C | 1 |
| 12 | 0.327764 | L | 0 |
| 4  | 0.453792 | C | 1 |
| 12 | 0.327764 | L | 0 |
| 5  | 0.18654  | C | 1 |
| 11 | 0.529116 | C | 1 |
| 1  | 0.498408 | C | 1 |
| 9  | 0.190285 | L | 0 |
| 6  | 0.595786 | C | 1 |
| 4  | 0.453792 | C | 1 |
| 9  | 0.255045 | C | 1 |
| 12 | 0.383239 | C | 1 |
| 7  | 0.435442 | C | 1 |
| 4  | 0.428096 | I | 0 |
| 9  | 0.190285 | L | 0 |
| 6  | 0.595786 | C | 1 |
| 6  | 0.339573 | C | 1 |
| 4  | 0.449324 | B | 1 |
| 2  | 0.300252 | C | 1 |
| 12 | 0.383239 | C | 1 |

|    |          |   |   |
|----|----------|---|---|
| 4  | 0.453792 | C | 1 |
| 9  | 0.255045 | C | 1 |
| 1  | 0.498408 | C | 1 |
| 5  | 0.18654  | C | 1 |
| 20 | 0.440197 | I | 0 |
| 7  | 0.435442 | C | 1 |
| 12 | 0.383239 | C | 1 |
| 7  | 0.435442 | C | 1 |
| 7  | 0.435442 | C | 1 |
| 10 | 0.331693 | C | 1 |
| 19 | 0.477519 | D | 1 |
| 12 | 0.383239 | C | 1 |
| 20 | 0.440197 | I | 0 |
| 1  | 0.150133 | C | 1 |
| 10 | 0.331693 | C | 1 |
| 5  | 0.207192 | C | 1 |
| 9  | 0.226635 | C | 1 |
| 4  | 0.453792 | C | 1 |
| 9  | 0.226635 | C | 1 |
| 13 | 0.727089 | G | 0 |
| 7  | 0.435442 | C | 1 |
| 7  | 0.435442 | C | 1 |
| 4  | 0.416488 | E | 1 |
| 13 | 0.727089 | G | 0 |
| 7  | 0.435442 | C | 1 |
| 7  | 0.435442 | C | 1 |
| 5  | 0.18654  | C | 1 |
| 19 | 0.477519 | D | 1 |
| 5  | 0.123126 | C | 1 |
| 5  | 0.429386 | C | 1 |
| 5  | 0.252202 | C | 1 |
| 4  | 0.364113 | C | 1 |
| 13 | 0.727089 | G | 0 |
| 4  | 0.299793 | C | 1 |
| 5  | 0.429386 | C | 1 |
| 4  | 0.428096 | I | 0 |
| 4  | 0.453792 | C | 1 |
| 4  | 0.299793 | C | 1 |
| 19 | 0.477519 | D | 1 |
| 10 | 0.331693 | C | 1 |
| 12 | 0.519946 | C | 1 |
| 4  | 0.364113 | C | 1 |
| 2  | 0.247371 | C | 1 |
| 15 | 0.318312 | C | 1 |
| 5  | 0.18654  | C | 1 |
| 5  | 0.18654  | C | 1 |
| 5  | 0.18654  | C | 1 |
| 12 | 0.383239 | C | 1 |
| 9  | 0.212443 | C | 1 |
| 12 | 0.327764 | L | 0 |
| 4  | 0.453792 | C | 1 |
| 4  | 0.416488 | E | 1 |
| 1  | 0.220693 | I | 0 |
| 6  | 0.459453 | C | 1 |

|    |          |   |   |
|----|----------|---|---|
| 12 | 0.519946 | C | 1 |
| 6  | 0.217624 | I | 0 |
| 6  | 0.459453 | C | 1 |
| 12 | 0.327764 | L | 0 |
| 6  | 0.339573 | C | 1 |
| 5  | 0.18654  | C | 1 |
| 12 | 0.519946 | C | 1 |
| 2  | 0.300252 | C | 1 |
| 6  | 0.339573 | C | 1 |
| 4  | 0.453792 | C | 1 |
| 6  | 0.538806 | C | 1 |
| 6  | 0.538806 | C | 1 |
| 19 | 0.477519 | D | 1 |
| 23 | 0.774992 | C | 1 |
| 7  | 0.350845 | C | 1 |
| 4  | 0.449324 | B | 1 |
| 12 | 0.383239 | C | 1 |
| 6  | 0.339573 | C | 1 |
| 9  | 0.212443 | C | 1 |
| 7  | 0.435442 | C | 1 |
| 6  | 0.595786 | C | 1 |
| 7  | 0.435442 | C | 1 |
| 4  | 0.428096 | I | 0 |
| 15 | 0.318312 | C | 1 |
| 6  | 0.339573 | C | 1 |
| 4  | 0.428096 | I | 0 |
| 5  | 0.651003 | I | 0 |
| 6  | 0.217624 | I | 0 |
| 5  | 0.252202 | C | 1 |
| 5  | 0.429386 | C | 1 |
| 20 | 0.259251 | C | 1 |
| 1  | 0.212017 | C | 1 |
| 4  | 0.319325 | C | 1 |
| 6  | 0.217624 | I | 0 |
| 6  | 0.217624 | I | 0 |
| 12 | 0.519946 | C | 1 |
| 4  | 0.449324 | B | 1 |
| 12 | 0.327764 | L | 0 |
| 4  | 0.449324 | B | 1 |
| 2  | 0.247371 | C | 1 |
| 23 | 0.774992 | C | 1 |
| 18 | 0.679972 | L | 0 |
| 4  | 0.299793 | C | 1 |
| 9  | 0.255045 | C | 1 |
| 7  | 0.435442 | C | 1 |
| 23 | 0.571952 | C | 1 |
| 5  | 0.207192 | C | 1 |
| 23 | 0.774992 | C | 1 |
| 5  | 0.18654  | C | 1 |
| 4  | 0.525385 | D | 1 |
| 12 | 0.519946 | C | 1 |
| 9  | 0.190285 | L | 0 |
| 9  | 0.134035 | C | 1 |
| 7  | 0.350845 | C | 1 |

|    |          |   |   |
|----|----------|---|---|
| 9  | 0.134035 | C | 1 |
| 12 | 0.519946 | C | 1 |
| 23 | 0.571952 | C | 1 |
| 6  | 0.339573 | C | 1 |
| 6  | 0.217624 | I | 0 |
| 4  | 0.449324 | B | 1 |
| 9  | 0.255045 | C | 1 |
| 7  | 0.350845 | C | 1 |
| 9  | 0.212443 | C | 1 |
| 20 | 0.440197 | I | 0 |
| 7  | 0.350845 | C | 1 |
| 7  | 0.350845 | C | 1 |
| 5  | 0.207192 | C | 1 |
| 23 | 0.774992 | C | 1 |
| 6  | 0.339573 | C | 1 |
| 4  | 0.416488 | E | 1 |
| 1  | 0.212017 | C | 1 |
| 4  | 0.299793 | C | 1 |
| 20 | 0.440197 | I | 0 |
| 6  | 0.538806 | C | 1 |
| 4  | 0.525385 | D | 1 |
| 10 | 0.82398  | E | 1 |
| 4  | 0.273704 | I | 0 |
| 20 | 0.259251 | C | 1 |
| 4  | 0.319325 | C | 1 |
| 5  | 0.207192 | C | 1 |
| 12 | 0.519946 | C | 1 |
| 4  | 0.428096 | I | 0 |
| 6  | 0.339573 | C | 1 |
| 7  | 0.350845 | C | 1 |
| 9  | 0.255045 | C | 1 |
| 4  | 0.453792 | C | 1 |
| 10 | 0.331693 | C | 1 |
| 5  | 0.429386 | C | 1 |
| 12 | 0.519946 | C | 1 |
| 7  | 0.435442 | C | 1 |
| 2  | 0.300252 | C | 1 |
| 20 | 0.440197 | I | 0 |
| 19 | 0.477519 | D | 1 |
| 12 | 0.383239 | C | 1 |
| 23 | 0.774992 | C | 1 |
| 9  | 0.255045 | C | 1 |
| 12 | 0.519946 | C | 1 |
| 6  | 0.459453 | C | 1 |
| 5  | 0.123126 | C | 1 |
| 6  | 0.595786 | C | 1 |
| 7  | 0.435442 | C | 1 |
| 5  | 0.252202 | C | 1 |
| 6  | 0.217624 | I | 0 |
| 2  | 0.300252 | C | 1 |
| 2  | 0.300252 | C | 1 |
| 2  | 0.300252 | C | 1 |
| 5  | 0.252202 | C | 1 |
| 7  | 0.246789 | C | 1 |

|    |          |   |   |
|----|----------|---|---|
| 13 | 0.727089 | G | 0 |
| 4  | 0.453792 | C | 1 |
| 5  | 0.429386 | C | 1 |
| 11 | 0.529116 | C | 1 |
| 7  | 0.435442 | C | 1 |
| 7  | 0.435442 | C | 1 |
| 6  | 0.538806 | C | 1 |
| 12 | 0.519946 | C | 1 |
| 4  | 0.453792 | C | 1 |
| 7  | 0.246789 | C | 1 |
| 15 | 0.318312 | C | 1 |
| 19 | 0.477519 | D | 1 |
| 4  | 0.453792 | C | 1 |
| 20 | 0.259251 | C | 1 |
| 12 | 0.327764 | L | 0 |
| 6  | 0.538806 | C | 1 |
| 4  | 0.273704 | I | 0 |
| 4  | 0.273704 | I | 0 |
| 12 | 0.383239 | C | 1 |
| 1  | 0.150133 | C | 1 |
| 5  | 0.429386 | C | 1 |
| 7  | 0.435442 | C | 1 |
| 12 | 0.383239 | C | 1 |
| 7  | 0.435442 | C | 1 |
| 15 | 0.318312 | C | 1 |
| 23 | 0.571952 | C | 1 |
| 7  | 0.350845 | C | 1 |
| 6  | 0.538806 | C | 1 |
| 10 | 0.331693 | C | 1 |
| 20 | 0.259251 | C | 1 |
| 6  | 0.595786 | C | 1 |
| 6  | 0.339573 | C | 1 |
| 5  | 0.18654  | C | 1 |
| 10 | 0.82398  | E | 1 |
| 4  | 0.453792 | C | 1 |
| 4  | 0.525385 | D | 1 |
| 6  | 0.595786 | C | 1 |
| 23 | 0.774992 | C | 1 |
| 7  | 0.435442 | C | 1 |
| 15 | 0.318312 | C | 1 |
| 10 | 0.331693 | C | 1 |
| 4  | 0.525385 | D | 1 |
| 19 | 0.477519 | D | 1 |
| 1  | 0.498408 | C | 1 |
| 12 | 0.519946 | C | 1 |
| 20 | 0.259251 | C | 1 |
| 7  | 0.435442 | C | 1 |
| 7  | 0.246789 | C | 1 |
| 4  | 0.453792 | C | 1 |
| 4  | 0.453792 | C | 1 |
| 4  | 0.453792 | C | 1 |
| 4  | 0.453792 | C | 1 |
| 4  | 0.453792 | C | 1 |
| 1  | 0.212017 | C | 1 |



|    |          |   |   |
|----|----------|---|---|
| 11 | 0.529116 | C | 1 |
| 1  | 0.212017 | C | 1 |
| 4  | 0.428096 | I | 0 |
| 12 | 0.519946 | C | 1 |
| 4  | 0.453792 | C | 1 |
| 5  | 0.252202 | C | 1 |
| 18 | 0.449772 | G | 0 |
| 15 | 0.318312 | C | 1 |
| 1  | 0.112444 | C | 1 |
| 11 | 0.529116 | C | 1 |
| 4  | 0.453792 | C | 1 |
| 6  | 0.538806 | C | 1 |
| 12 | 0.383239 | C | 1 |
| 6  | 0.595786 | C | 1 |
| 6  | 0.339573 | C | 1 |
| 10 | 0.331693 | C | 1 |
| 4  | 0.453792 | C | 1 |
| 15 | 0.318312 | C | 1 |
| 5  | 0.429386 | C | 1 |
| 5  | 0.123126 | C | 1 |
| 6  | 0.339573 | C | 1 |
| 4  | 0.449324 | B | 1 |
| 1  | 0.112444 | C | 1 |
| 4  | 0.525385 | D | 1 |
| 7  | 0.435442 | C | 1 |
| 6  | 0.459453 | C | 1 |
| 15 | 0.318312 | C | 1 |
| 10 | 0.331693 | C | 1 |
| 20 | 0.259251 | C | 1 |
| 13 | 0.727089 | G | 0 |
| 5  | 0.18654  | C | 1 |
| 8  | 0.626063 | C | 1 |
| 23 | 0.571952 | C | 1 |
| 9  | 0.255045 | C | 1 |
| 9  | 0.212443 | C | 1 |
| 20 | 0.259251 | C | 1 |
| 7  | 0.246789 | C | 1 |
| 6  | 0.595786 | C | 1 |
| 4  | 0.273704 | I | 0 |
| 7  | 0.435442 | C | 1 |
| 5  | 0.18654  | C | 1 |
| 9  | 0.255045 | C | 1 |
| 6  | 0.459453 | C | 1 |
| 9  | 0.255045 | C | 1 |
| 7  | 0.435442 | C | 1 |
| 7  | 0.435442 | C | 1 |
| 6  | 0.459453 | C | 1 |
| 11 | 0.529116 | C | 1 |
| 13 | 0.727089 | G | 0 |
| 10 | 0.331693 | C | 1 |
| 5  | 0.123126 | C | 1 |
| 4  | 0.525385 | D | 1 |
| 9  | 0.226635 | C | 1 |
| 4  | 0.416488 | E | 1 |

|    |          |   |   |
|----|----------|---|---|
| 4  | 0.299793 | C | 1 |
| 4  | 0.453792 | C | 1 |
| 10 | 0.82398  | E | 1 |
| 6  | 0.217624 | I | 0 |
| 6  | 0.538806 | C | 1 |
| 10 | 0.82398  | E | 1 |
| 10 | 0.82398  | E | 1 |
| 2  | 0.300252 | C | 1 |
| 1  | 0.220693 | I | 0 |
| 15 | 0.318312 | C | 1 |
| 5  | 0.18654  | C | 1 |
| 20 | 0.259251 | C | 1 |
| 4  | 0.453792 | C | 1 |
| 1  | 0.150133 | C | 1 |
| 5  | 0.429386 | C | 1 |
| 15 | 0.318312 | C | 1 |
| 6  | 0.217624 | I | 0 |
| 4  | 0.449324 | B | 1 |
| 4  | 0.449324 | B | 1 |
| 10 | 0.82398  | E | 1 |
| 7  | 0.246789 | C | 1 |
| 1  | 0.498408 | C | 1 |
| 20 | 0.259251 | C | 1 |
| 19 | 0.477519 | D | 1 |
| 12 | 0.327764 | L | 0 |
| 5  | 0.18654  | C | 1 |
| 6  | 0.538806 | C | 1 |
| 12 | 0.519946 | C | 1 |
| 9  | 0.212443 | C | 1 |
| 4  | 0.453792 | C | 1 |
| 18 | 0.679972 | L | 0 |
| 4  | 0.453792 | C | 1 |
| 9  | 0.226635 | C | 1 |
| 1  | 0.220693 | I | 0 |
| 4  | 0.453792 | C | 1 |
| 23 | 0.571952 | C | 1 |
| 8  | 0.626063 | C | 1 |
| 4  | 0.453792 | C | 1 |
| 4  | 0.273704 | I | 0 |
| 9  | 0.190285 | L | 0 |
| 9  | 0.226635 | C | 1 |
| 9  | 0.255045 | C | 1 |
| 4  | 0.416488 | E | 1 |
| 12 | 0.519946 | C | 1 |
| 19 | 0.477519 | D | 1 |
| 6  | 0.339573 | C | 1 |
| 19 | 0.477519 | D | 1 |
| 19 | 0.477519 | D | 1 |
| 9  | 0.134035 | C | 1 |
| 1  | 0.112444 | C | 1 |
| 1  | 0.112444 | C | 1 |
| 12 | 0.519946 | C | 1 |
| 18 | 0.449772 | G | 0 |
| 1  | 0.150133 | C | 1 |

|    |          |   |   |
|----|----------|---|---|
| 5  | 0.18654  | C | 1 |
| 15 | 0.318312 | C | 1 |
| 15 | 0.318312 | C | 1 |
| 12 | 0.383239 | C | 1 |
| 5  | 0.429386 | C | 1 |
| 12 | 0.383239 | C | 1 |
| 5  | 0.18654  | C | 1 |
| 6  | 0.217624 | I | 0 |
| 20 | 0.259251 | C | 1 |
| 7  | 0.435442 | C | 1 |
| 6  | 0.538806 | C | 1 |
| 1  | 0.212017 | C | 1 |
| 4  | 0.453792 | C | 1 |
| 12 | 0.327764 | L | 0 |
| 4  | 0.453792 | C | 1 |
| 4  | 0.453792 | C | 1 |
| 19 | 0.477519 | D | 1 |
| 1  | 0.498408 | C | 1 |
| 19 | 0.477519 | D | 1 |
| 4  | 0.525385 | D | 1 |
| 15 | 0.318312 | C | 1 |
| 4  | 0.453792 | C | 1 |
| 18 | 0.449772 | G | 0 |
| 4  | 0.299793 | C | 1 |
| 7  | 0.350845 | C | 1 |
| 7  | 0.435442 | C | 1 |
| 6  | 0.595786 | C | 1 |
| 9  | 0.212443 | C | 1 |
| 1  | 0.150133 | C | 1 |
| 11 | 0.529116 | C | 1 |
| 15 | 0.318312 | C | 1 |
| 13 | 0.727089 | G | 0 |
| 15 | 0.318312 | C | 1 |
| 7  | 0.246789 | C | 1 |
| 15 | 0.318312 | C | 1 |
| 15 | 0.318312 | C | 1 |
| 6  | 0.459453 | C | 1 |
| 4  | 0.453792 | C | 1 |
| 12 | 0.383239 | C | 1 |
| 20 | 0.440197 | I | 0 |
| 6  | 0.339573 | C | 1 |
| 6  | 0.339573 | C | 1 |
| 6  | 0.595786 | C | 1 |
| 5  | 0.429386 | C | 1 |
| 12 | 0.383239 | C | 1 |
| 5  | 0.18654  | C | 1 |
| 12 | 0.383239 | C | 1 |
| 4  | 0.299793 | C | 1 |
| 5  | 0.651003 | I | 0 |
| 4  | 0.453792 | C | 1 |
| 4  | 0.453792 | C | 1 |
| 4  | 0.416488 | E | 1 |
| 5  | 0.651003 | I | 0 |
| 5  | 0.651003 | I | 0 |

|    |          |   |   |
|----|----------|---|---|
| 7  | 0.435442 | C | 1 |
| 9  | 0.134035 | C | 1 |
| 9  | 0.212443 | C | 1 |
| 19 | 0.477519 | D | 1 |
| 1  | 0.112444 | C | 1 |
| 6  | 0.339573 | C | 1 |
| 12 | 0.327764 | L | 0 |
| 4  | 0.364113 | C | 1 |
| 2  | 0.300252 | C | 1 |
| 9  | 0.255045 | C | 1 |
| 4  | 0.273704 | I | 0 |
| 5  | 0.429386 | C | 1 |
| 6  | 0.339573 | C | 1 |
| 13 | 0.727089 | G | 0 |
| 6  | 0.459453 | C | 1 |
| 4  | 0.364113 | C | 1 |
| 1  | 0.150133 | C | 1 |
| 19 | 0.477519 | D | 1 |
| 19 | 0.477519 | D | 1 |
| 6  | 0.595786 | C | 1 |
| 5  | 0.429386 | C | 1 |
| 6  | 0.595786 | C | 1 |
| 23 | 0.571952 | C | 1 |
| 4  | 0.453792 | C | 1 |
| 20 | 0.440197 | I | 0 |
| 5  | 0.18654  | C | 1 |
| 9  | 0.212443 | C | 1 |
| 12 | 0.383239 | C | 1 |
| 7  | 0.350845 | C | 1 |
| 5  | 0.651003 | I | 0 |
| 7  | 0.435442 | C | 1 |
| 15 | 0.318312 | C | 1 |
| 12 | 0.519946 | C | 1 |
| 10 | 0.331693 | C | 1 |
| 23 | 0.774992 | C | 1 |
| 9  | 0.226635 | C | 1 |
| 5  | 0.207192 | C | 1 |
| 6  | 0.595786 | C | 1 |
| 2  | 0.300252 | C | 1 |
| 2  | 0.300252 | C | 1 |
| 8  | 0.626063 | C | 1 |
| 1  | 0.220693 | I | 0 |
| 4  | 0.525385 | D | 1 |
| 1  | 0.212017 | C | 1 |
| 9  | 0.134035 | C | 1 |
| 12 | 0.383239 | C | 1 |
| 4  | 0.525385 | D | 1 |
| 11 | 0.529116 | C | 1 |
| 11 | 0.529116 | C | 1 |
| 8  | 0.626063 | C | 1 |
| 4  | 0.319325 | C | 1 |
| 5  | 0.252202 | C | 1 |
| 1  | 0.220693 | I | 0 |
| 11 | 0.529116 | C | 1 |

|    |          |   |   |
|----|----------|---|---|
| 2  | 0.300252 | C | 1 |
| 15 | 0.318312 | C | 1 |
| 5  | 0.123126 | C | 1 |
| 7  | 0.435442 | C | 1 |
| 7  | 0.350845 | C | 1 |
| 4  | 0.428096 | I | 0 |
| 6  | 0.531434 | C | 1 |
| 6  | 0.531434 | C | 1 |
| 6  | 0.531434 | C | 1 |
| 6  | 0.531434 | C | 1 |
| 6  | 0.531434 | C | 1 |
| 6  | 0.531434 | C | 1 |
| 6  | 0.531434 | C | 1 |
| 6  | 0.531434 | C | 1 |
| 6  | 0.531434 | C | 1 |
| 6  | 0.531434 | C | 1 |
| 6  | 0.531434 | C | 1 |
| 17 | 0.710503 | B | 1 |
| 17 | 0.710503 | B | 1 |
| 17 | 0.710503 | B | 1 |
| 23 | 0.35885  | C | 1 |
| 15 | 0.470834 | C | 1 |
| 23 | 0.35885  | C | 1 |
| 23 | 0.35885  | C | 1 |
| 15 | 0.470834 | C | 1 |
| 23 | 0.35885  | C | 1 |
| 23 | 0.35885  | C | 1 |
| 23 | 0.35885  | C | 1 |
| 15 | 0.470834 | C | 1 |
| 15 | 0.470834 | C | 1 |
| 23 | 0.35885  | C | 1 |
| 23 | 0.35885  | C | 1 |
| 15 | 0.470834 | C | 1 |
| 6  | 0.263377 | C | 1 |
| 23 | 0.35885  | C | 1 |
| 6  | 0.263377 | C | 1 |
| 15 | 0.470834 | C | 1 |
| 6  | 0.263377 | C | 1 |
| 9  | 0.327508 | B | 1 |
| 9  | 0.327508 | B | 1 |
| 9  | 0.327508 | B | 1 |
| 9  | 0.327508 | B | 1 |
| 9  | 0.327508 | B | 1 |
| 9  | 0.327508 | B | 1 |
| 9  | 0.327508 | B | 1 |
| 9  | 0.327508 | B | 1 |
| 9  | 0.327508 | B | 1 |
| 9  | 0.327508 | B | 1 |
| 9  | 0.327508 | B | 1 |
| 9  | 0.327508 | B | 1 |
| 9  | 0.327508 | B | 1 |
| 5  | 0.37947  | C | 1 |
| 12 | 0.689087 | C | 1 |
| 12 | 0.689087 | C | 1 |
| 7  | 0.522712 | C | 1 |
| 7  | 0.522712 | C | 1 |

|    |          |   |   |
|----|----------|---|---|
| 12 | 0.689087 | C | 1 |
| 7  | 0.522712 | C | 1 |
| 12 | 0.689087 | C | 1 |
| 12 | 0.689087 | C | 1 |
| 12 | 0.689087 | C | 1 |
| 12 | 0.689087 | C | 1 |
| 12 | 0.689087 | C | 1 |
| 12 | 0.689087 | C | 1 |
| 12 | 0.689087 | C | 1 |
| 12 | 0.689087 | C | 1 |
| 12 | 0.689087 | C | 1 |
| 12 | 0.689087 | C | 1 |
| 4  | 0.705385 | C | 1 |
| 12 | 0.689087 | C | 1 |
| 12 | 0.689087 | C | 1 |
| 1  | 0.387022 | C | 1 |
| 4  | 0.705385 | C | 1 |
| 12 | 0.689087 | C | 1 |
| 12 | 0.689087 | C | 1 |
| 12 | 0.689087 | C | 1 |
| 5  | 0.37947  | C | 1 |
| 1  | 0.387022 | C | 1 |
| 12 | 0.689087 | C | 1 |
| 12 | 0.689087 | C | 1 |
| 1  | 0.387022 | C | 1 |
| 4  | 0.705385 | C | 1 |
| 12 | 0.689087 | C | 1 |
| 7  | 0.522712 | C | 1 |
| 12 | 0.689087 | C | 1 |
| 12 | 0.689087 | C | 1 |
| 12 | 0.689087 | C | 1 |
| 4  | 0.705385 | C | 1 |
| 5  | 0.37947  | C | 1 |
| 5  | 0.37947  | C | 1 |
| 4  | 0.705385 | C | 1 |
| 12 | 0.689087 | C | 1 |
| 12 | 0.689087 | C | 1 |
| 7  | 0.522712 | C | 1 |
| 12 | 0.689087 | C | 1 |
| 5  | 0.37947  | C | 1 |
| 12 | 0.689087 | C | 1 |
| 12 | 0.689087 | C | 1 |
| 12 | 0.689087 | C | 1 |
| 4  | 0.705385 | C | 1 |
| 4  | 0.705385 | C | 1 |
| 5  | 0.37947  | C | 1 |
| 12 | 0.689087 | C | 1 |
| 4  | 0.705385 | C | 1 |
| 12 | 0.689087 | C | 1 |
| 7  | 0.522712 | C | 1 |
| 12 | 0.689087 | C | 1 |
| 7  | 0.522712 | C | 1 |
| 7  | 0.522712 | C | 1 |

|    |          |   |   |
|----|----------|---|---|
| 12 | 0.689087 | C | 1 |
| 12 | 0.689087 | C | 1 |
| 12 | 0.689087 | C | 1 |
| 12 | 0.689087 | C | 1 |
| 7  | 0.522712 | C | 1 |
| 5  | 0.37947  | C | 1 |
| 7  | 0.522712 | C | 1 |
| 12 | 0.689087 | C | 1 |
| 12 | 0.689087 | C | 1 |
| 7  | 0.522712 | C | 1 |
| 1  | 0.153801 | C | 1 |
| 6  | 0.204444 | C | 1 |
| 1  | 0.536716 | I | 0 |
| 1  | 0.292836 | I | 0 |
| 1  | 0.153801 | C | 1 |
| 9  | 0.497673 | C | 1 |
| 5  | 0.649958 | C | 1 |
| 1  | 0.292836 | I | 0 |
| 12 | 0.448494 | C | 1 |
| 12 | 0.448494 | C | 1 |
| 6  | 0.4913   | C | 1 |
| 15 | 0.645374 | C | 1 |
| 15 | 0.645374 | C | 1 |
| 2  | 0.25255  | I | 0 |
| 5  | 0.577098 | I | 0 |
| 7  | 0.353508 | C | 1 |
| 21 | 0.739255 | C | 1 |
| 1  | 0.227045 | C | 1 |
| 12 | 0.302335 | C | 1 |
| 21 | 0.527149 | C | 1 |
| 4  | 0.234461 | C | 1 |
| 9  | 0.497673 | C | 1 |
| 21 | 0.739255 | C | 1 |
| 15 | 0.645374 | C | 1 |
| 1  | 0.285893 | C | 1 |
| 1  | 0.289164 | C | 1 |
| 6  | 0.510192 | C | 1 |
| 21 | 0.527149 | C | 1 |
| 15 | 0.809038 | K | 1 |
| 8  | 0.569013 | I | 0 |
| 7  | 0.209311 | C | 1 |
| 12 | 0.448494 | C | 1 |
| 6  | 0.204444 | C | 1 |
| 21 | 0.739255 | C | 1 |
| 6  | 0.204444 | C | 1 |
| 22 | 0.68853  | I | 0 |
| 1  | 0.137406 | C | 1 |
| 23 | 0.220494 | D | 1 |
| 9  | 0.497673 | C | 1 |
| 8  | 0.134268 | I | 0 |
| 15 | 0.809038 | K | 1 |
| 5  | 0.649958 | C | 1 |
| 12 | 0.448494 | C | 1 |
| 1  | 0.218771 | C | 1 |

|    |          |   |   |
|----|----------|---|---|
| 2  | 0.578754 | C | 1 |
| 6  | 0.204444 | C | 1 |
| 13 | 0.44623  | C | 1 |
| 12 | 0.302335 | C | 1 |
| 8  | 0.569013 | I | 0 |
| 12 | 0.448494 | C | 1 |
| 12 | 0.448494 | C | 1 |
| 21 | 0.115135 | R | 0 |
| 8  | 0.134268 | I | 0 |
| 14 | 0.239994 | C | 1 |
| 1  | 0.227045 | C | 1 |
| 12 | 0.448494 | C | 1 |
| 1  | 0.218771 | C | 1 |
| 23 | 0.220494 | D | 1 |
| 22 | 0.68853  | I | 0 |
| 1  | 0.285893 | C | 1 |
| 12 | 0.448494 | C | 1 |
| 1  | 0.285893 | C | 1 |
| 7  | 0.209311 | C | 1 |
| 9  | 0.497673 | C | 1 |
| 12 | 0.302335 | C | 1 |
| 12 | 0.302335 | C | 1 |
| 21 | 0.739255 | C | 1 |
| 1  | 0.268691 | I | 0 |
| 5  | 0.649958 | C | 1 |
| 21 | 0.739255 | C | 1 |
| 18 | 0.38971  | C | 1 |
| 1  | 0.268691 | I | 0 |
| 1  | 0.289164 | C | 1 |
| 12 | 0.302335 | C | 1 |
| 17 | 0.923242 | C | 1 |
| 9  | 0.497673 | C | 1 |
| 12 | 0.302335 | C | 1 |
| 2  | 0.578754 | C | 1 |
| 12 | 0.448494 | C | 1 |
| 18 | 0.38971  | C | 1 |
| 8  | 0.569013 | I | 0 |
| 6  | 0.510192 | C | 1 |
| 5  | 0.577098 | I | 0 |
| 7  | 0.353508 | C | 1 |
| 21 | 0.739255 | C | 1 |
| 14 | 0.239994 | C | 1 |
| 9  | 0.497673 | C | 1 |
| 15 | 0.809038 | K | 1 |
| 15 | 0.245764 | C | 1 |
| 21 | 0.527149 | C | 1 |
| 12 | 0.448494 | C | 1 |
| 15 | 0.245764 | C | 1 |
| 6  | 0.510192 | C | 1 |
| 6  | 0.510192 | C | 1 |
| 7  | 0.209311 | C | 1 |
| 1  | 0.227045 | C | 1 |
| 2  | 0.25255  | I | 0 |
| 8  | 0.134268 | I | 0 |



|    |          |   |   |
|----|----------|---|---|
| 6  | 0.4913   | C | 1 |
| 23 | 0.220494 | D | 1 |
| 23 | 0.220494 | D | 1 |
| 6  | 0.510192 | C | 1 |
| 13 | 0.44623  | C | 1 |
| 1  | 0.285893 | C | 1 |
| 1  | 0.218771 | C | 1 |
| 21 | 0.115135 | R | 0 |
| 8  | 0.569013 | I | 0 |
| 5  | 0.649958 | C | 1 |
| 12 | 0.448494 | C | 1 |
| 21 | 0.739255 | C | 1 |
| 21 | 0.739255 | C | 1 |
| 21 | 0.739255 | C | 1 |
| 21 | 0.739255 | C | 1 |
| 17 | 0.923242 | C | 1 |
| 8  | 0.569013 | I | 0 |
| 12 | 0.448494 | C | 1 |
| 7  | 0.353508 | C | 1 |
| 6  | 0.510192 | C | 1 |
| 6  | 0.4913   | C | 1 |
| 1  | 0.166868 | C | 1 |
| 17 | 0.923242 | C | 1 |
| 2  | 0.25255  | I | 0 |
| 7  | 0.353508 | C | 1 |
| 5  | 0.649958 | C | 1 |
| 21 | 0.739255 | C | 1 |
| 2  | 0.25255  | I | 0 |
| 5  | 0.649958 | C | 1 |
| 8  | 0.569013 | I | 0 |
| 7  | 0.353508 | C | 1 |
| 12 | 0.448494 | C | 1 |
| 9  | 0.497673 | C | 1 |
| 5  | 0.649958 | C | 1 |
| 1  | 0.536716 | I | 0 |
| 1  | 0.289164 | C | 1 |
| 1  | 0.153801 | C | 1 |
| 12 | 0.302335 | C | 1 |
| 7  | 0.271834 | C | 1 |
| 1  | 0.536716 | I | 0 |
| 7  | 0.353508 | C | 1 |
| 21 | 0.739255 | C | 1 |
| 6  | 0.510192 | C | 1 |
| 6  | 0.510192 | C | 1 |
| 1  | 0.137406 | C | 1 |
| 1  | 0.289164 | C | 1 |
| 1  | 0.289164 | C | 1 |
| 1  | 0.289164 | C | 1 |
| 1  | 0.289164 | C | 1 |
| 1  | 0.289164 | C | 1 |
| 7  | 0.353508 | C | 1 |
| 15 | 0.809038 | K | 1 |
| 1  | 0.289164 | C | 1 |
| 22 | 0.68853  | I | 0 |

|    |          |   |   |
|----|----------|---|---|
| 21 | 0.527149 | C | 1 |
| 4  | 0.234461 | C | 1 |
| 1  | 0.268691 | I | 0 |
| 21 | 0.739255 | C | 1 |
| 18 | 0.38971  | C | 1 |
| 6  | 0.510192 | C | 1 |
| 1  | 0.166868 | C | 1 |
| 6  | 0.4913   | C | 1 |
| 1  | 0.285893 | C | 1 |
| 6  | 0.510192 | C | 1 |
| 1  | 0.285893 | C | 1 |
| 4  | 0.234461 | C | 1 |
| 12 | 0.448494 | C | 1 |
| 8  | 0.134268 | I | 0 |
| 12 | 0.302335 | C | 1 |
| 1  | 0.153801 | C | 1 |
| 18 | 0.38971  | C | 1 |
| 12 | 0.448494 | C | 1 |
| 15 | 0.809038 | K | 1 |
| 13 | 0.44623  | C | 1 |
| 1  | 0.289164 | C | 1 |
| 8  | 0.569013 | I | 0 |
| 8  | 0.134268 | I | 0 |
| 7  | 0.209311 | C | 1 |
| 5  | 0.577098 | I | 0 |
| 1  | 0.285893 | C | 1 |
| 5  | 0.649958 | C | 1 |
| 9  | 0.497673 | C | 1 |
| 1  | 0.166868 | C | 1 |
| 1  | 0.268691 | I | 0 |
| 18 | 0.38971  | C | 1 |
| 12 | 0.448494 | C | 1 |
| 9  | 0.497673 | C | 1 |
| 21 | 0.115135 | R | 0 |
| 21 | 0.527149 | C | 1 |
| 6  | 0.510192 | C | 1 |
| 6  | 0.510192 | C | 1 |
| 15 | 0.645374 | C | 1 |
| 9  | 0.497673 | C | 1 |
| 6  | 0.510192 | C | 1 |
| 21 | 0.115135 | R | 0 |
| 6  | 0.510192 | C | 1 |
| 1  | 0.285893 | C | 1 |
| 7  | 0.209311 | C | 1 |
| 21 | 0.739255 | C | 1 |
| 8  | 0.569013 | I | 0 |
| 12 | 0.302335 | C | 1 |
| 13 | 0.44623  | C | 1 |
| 1  | 0.153801 | C | 1 |
| 12 | 0.448494 | C | 1 |
| 9  | 0.497673 | C | 1 |
| 1  | 0.227045 | C | 1 |
| 21 | 0.527149 | C | 1 |
| 17 | 0.923242 | C | 1 |

|    |          |   |   |
|----|----------|---|---|
| 1  | 0.285893 | C | 1 |
| 8  | 0.569013 | I | 0 |
| 8  | 0.569013 | I | 0 |
| 8  | 0.134268 | I | 0 |
| 1  | 0.227045 | C | 1 |
| 13 | 0.44623  | C | 1 |
| 6  | 0.204444 | C | 1 |
| 7  | 0.271834 | C | 1 |
| 6  | 0.510192 | C | 1 |
| 13 | 0.44623  | C | 1 |
| 21 | 0.739255 | C | 1 |
| 21 | 0.739255 | C | 1 |
| 6  | 0.204444 | C | 1 |
| 21 | 0.527149 | C | 1 |
| 21 | 0.739255 | C | 1 |
| 15 | 0.645374 | C | 1 |
| 12 | 0.448494 | C | 1 |
| 4  | 0.234461 | C | 1 |
| 6  | 0.4913   | C | 1 |
| 6  | 0.4913   | C | 1 |
| 6  | 0.4913   | C | 1 |
| 6  | 0.4913   | C | 1 |
| 6  | 0.4913   | C | 1 |
| 18 | 0.38971  | C | 1 |
| 4  | 0.234461 | C | 1 |
| 1  | 0.268691 | I | 0 |
| 12 | 0.448494 | C | 1 |
| 6  | 0.510192 | C | 1 |
| 21 | 0.527149 | C | 1 |
| 5  | 0.649958 | C | 1 |
| 5  | 0.577098 | I | 0 |
| 2  | 0.25255  | I | 0 |
| 2  | 0.578754 | C | 1 |
| 1  | 0.153801 | C | 1 |
| 1  | 0.153801 | C | 1 |
| 8  | 0.569013 | I | 0 |
| 21 | 0.739255 | C | 1 |
| 7  | 0.271834 | C | 1 |
| 13 | 0.44623  | C | 1 |
| 6  | 0.510192 | C | 1 |
| 5  | 0.577098 | I | 0 |
| 12 | 0.448494 | C | 1 |
| 5  | 0.649958 | C | 1 |
| 7  | 0.209311 | C | 1 |
| 6  | 0.510192 | C | 1 |
| 7  | 0.271834 | C | 1 |
| 5  | 0.649958 | C | 1 |
| 5  | 0.649958 | C | 1 |
| 8  | 0.134268 | I | 0 |
| 8  | 0.134268 | I | 0 |
| 5  | 0.577098 | I | 0 |
| 5  | 0.649958 | C | 1 |
| 6  | 0.204444 | C | 1 |
| 1  | 0.536716 | I | 0 |

|    |          |   |   |
|----|----------|---|---|
| 1  | 0.227045 | C | 1 |
| 6  | 0.510192 | C | 1 |
| 1  | 0.099333 | C | 1 |
| 7  | 0.271834 | C | 1 |
| 1  | 0.227045 | C | 1 |
| 5  | 0.649958 | C | 1 |
| 14 | 0.239994 | C | 1 |
| 2  | 0.578754 | C | 1 |
| 1  | 0.536716 | I | 0 |
| 5  | 0.577098 | I | 0 |
| 15 | 0.245764 | C | 1 |
| 18 | 0.38971  | C | 1 |
| 5  | 0.577098 | I | 0 |
| 2  | 0.578754 | C | 1 |
| 1  | 0.289164 | C | 1 |
| 7  | 0.353508 | C | 1 |
| 15 | 0.809038 | K | 1 |
| 22 | 0.68853  | I | 0 |
| 12 | 0.302335 | C | 1 |
| 12 | 0.448494 | C | 1 |
| 6  | 0.204444 | C | 1 |
| 15 | 0.809038 | K | 1 |
| 5  | 0.649958 | C | 1 |
| 13 | 0.44623  | C | 1 |
| 21 | 0.115135 | R | 0 |
| 5  | 0.649958 | C | 1 |
| 6  | 0.510192 | C | 1 |
| 4  | 0.234461 | C | 1 |
| 21 | 0.739255 | C | 1 |
| 22 | 0.68853  | I | 0 |
| 23 | 0.220494 | D | 1 |
| 8  | 0.134268 | I | 0 |
| 1  | 0.292836 | I | 0 |
| 2  | 0.25255  | I | 0 |
| 6  | 0.204444 | C | 1 |
| 6  | 0.510192 | C | 1 |
| 2  | 0.25255  | I | 0 |
| 1  | 0.137406 | C | 1 |
| 14 | 0.239994 | C | 1 |
| 17 | 0.923242 | C | 1 |
| 5  | 0.577098 | I | 0 |
| 15 | 0.645374 | C | 1 |
| 1  | 0.153801 | C | 1 |
| 1  | 0.227045 | C | 1 |
| 1  | 0.289164 | C | 1 |
| 1  | 0.099333 | C | 1 |
| 1  | 0.099333 | C | 1 |
| 7  | 0.271834 | C | 1 |
| 21 | 0.739255 | C | 1 |
| 5  | 0.649958 | C | 1 |
| 14 | 0.239994 | C | 1 |
| 19 | 0.351975 | C | 1 |
| 19 | 0.351975 | C | 1 |
| 19 | 0.351975 | C | 1 |

|    |          |   |   |
|----|----------|---|---|
| 4  | 0.118743 | C | 1 |
| 1  | 0.369188 | C | 1 |
| 1  | 0.369188 | C | 1 |
| 1  | 0.369188 | C | 1 |
| 4  | 0.118743 | C | 1 |
| 1  | 0.369188 | C | 1 |
| 1  | 0.369188 | C | 1 |
| 1  | 0.369188 | C | 1 |
| 4  | 0.118743 | C | 1 |
| 4  | 0.118743 | C | 1 |
| 4  | 0.118743 | C | 1 |
| 4  | 0.118743 | C | 1 |
| 1  | 0.369188 | C | 1 |
| 17 | 0.712666 | C | 1 |
| 21 | 0.452581 | C | 1 |
| 17 | 0.712666 | C | 1 |
| 21 | 0.452581 | C | 1 |
| 21 | 0.452581 | C | 1 |
| 21 | 0.452581 | C | 1 |
| 21 | 0.452581 | C | 1 |
| 21 | 0.452581 | C | 1 |
| 21 | 0.452581 | C | 1 |
| 21 | 0.452581 | C | 1 |
| 21 | 0.452581 | C | 1 |
| 21 | 0.452581 | C | 1 |
| 17 | 0.712666 | C | 1 |
| 17 | 0.712666 | C | 1 |
| 21 | 0.452581 | C | 1 |
| 17 | 0.712666 | C | 1 |
| 17 | 0.712666 | C | 1 |
| 12 | 0.354222 | C | 1 |
| 12 | 0.354222 | C | 1 |
| 1  | 0.080271 | M | 0 |
| 15 | 0.464045 | C | 1 |
| 6  | 0.068284 | C | 1 |
| 15 | 0.409932 | C | 1 |
| 15 | 0.464045 | C | 1 |
| 15 | 0.464045 | C | 1 |
| 1  | 0.080271 | M | 0 |
| 6  | 0.068284 | C | 1 |
| 12 | 0.354222 | C | 1 |
| 6  | 0.068284 | C | 1 |
| 15 | 0.409932 | C | 1 |
| 15 | 0.464045 | C | 1 |
| 15 | 0.464045 | C | 1 |
| 12 | 0.354222 | C | 1 |
| 12 | 0.354222 | C | 1 |
| 15 | 0.409932 | C | 1 |
| 15 | 0.464045 | C | 1 |
| 1  | 0.080271 | M | 0 |
| 15 | 0.464045 | C | 1 |
| 15 | 0.464045 | C | 1 |
| 12 | 0.354222 | C | 1 |
| 6  | 0.068284 | C | 1 |
| 15 | 0.464045 | C | 1 |

|    |          |   |   |
|----|----------|---|---|
| 15 | 0.464045 | C | 1 |
| 12 | 0.354222 | C | 1 |
| 15 | 0.464045 | C | 1 |
| 15 | 0.464045 | C | 1 |
| 15 | 0.464045 | C | 1 |
| 6  | 0.068284 | C | 1 |
| 15 | 0.464045 | C | 1 |
| 6  | 0.068284 | C | 1 |
| 20 | 0.625044 | C | 1 |
| 20 | 0.625044 | C | 1 |
| 20 | 0.625044 | C | 1 |
| 20 | 0.625044 | C | 1 |
| 20 | 0.625044 | C | 1 |
| 20 | 0.625044 | C | 1 |
| 20 | 0.625044 | C | 1 |
| 20 | 0.625044 | C | 1 |
| 20 | 0.625044 | C | 1 |
| 20 | 0.625044 | C | 1 |
| 17 | 0.372869 | C | 1 |
| 12 | 0.068284 | C | 1 |
| 12 | 0.068284 | C | 1 |
| 17 | 0.372869 | C | 1 |
| 17 | 0.372869 | C | 1 |
| 12 | 0.068284 | C | 1 |
| 12 | 0.068284 | C | 1 |
| 12 | 0.068284 | C | 1 |
| 12 | 0.068284 | C | 1 |
| 12 | 0.068284 | C | 1 |
| 12 | 0.068284 | C | 1 |
| 17 | 0.372869 | C | 1 |
| 17 | 0.372869 | C | 1 |
| 6  | 0.17246  | C | 1 |
| 7  | 0.137412 | I | 0 |
| 19 | 0.477059 | C | 1 |
| 16 | 0.585301 | C | 1 |
| 5  | 0.650102 | C | 1 |
| 4  | 0.297453 | C | 1 |
| 18 | 0.223899 | C | 1 |
| 13 | 0.508463 | C | 1 |
| 6  | 0.247092 | C | 1 |
| 7  | 0.137412 | I | 0 |
| 13 | 0.648745 | C | 1 |
| 5  | 0.650102 | C | 1 |
| 23 | 0.677975 | C | 1 |
| 17 | 0.430175 | C | 1 |
| 5  | 0.650102 | C | 1 |
| 18 | 0.223899 | C | 1 |
| 18 | 0.223899 | C | 1 |
| 19 | 0.477059 | C | 1 |
| 5  | 0.099894 | C | 1 |
| 13 | 0.775489 | C | 1 |
| 18 | 0.223899 | C | 1 |
| 6  | 0.662605 | C | 1 |
| 6  | 0.662605 | C | 1 |
| 4  | 0.471203 | C | 1 |

|    |          |   |   |
|----|----------|---|---|
| 1  | 0.609201 | C | 1 |
| 16 | 0.585301 | C | 1 |
| 13 | 0.775489 | C | 1 |
| 6  | 0.17246  | C | 1 |
| 6  | 0.662605 | C | 1 |
| 23 | 0.677975 | C | 1 |
| 19 | 0.477059 | C | 1 |
| 13 | 0.126399 | C | 1 |
| 6  | 0.565095 | C | 1 |
| 5  | 0.650102 | C | 1 |
| 6  | 0.662605 | C | 1 |
| 1  | 0.461856 | N | 0 |
| 6  | 0.662605 | C | 1 |
| 6  | 0.565095 | C | 1 |
| 17 | 0.430175 | C | 1 |
| 17 | 0.89653  | C | 1 |
| 6  | 0.662605 | C | 1 |
| 18 | 0.223899 | C | 1 |
| 5  | 0.398235 | C | 1 |
| 19 | 0.477059 | C | 1 |
| 4  | 0.471203 | C | 1 |
| 16 | 0.585301 | C | 1 |
| 23 | 0.677975 | C | 1 |
| 16 | 0.585301 | C | 1 |
| 5  | 0.146409 | C | 1 |
| 23 | 0.677975 | C | 1 |
| 4  | 0.471203 | C | 1 |
| 19 | 0.23758  | C | 1 |
| 1  | 0.461856 | N | 0 |
| 6  | 0.590858 | C | 1 |
| 16 | 0.585301 | C | 1 |
| 1  | 0.461856 | N | 0 |
| 17 | 0.430175 | C | 1 |
| 5  | 0.650102 | C | 1 |
| 6  | 0.590858 | C | 1 |
| 6  | 0.662605 | C | 1 |
| 13 | 0.508463 | C | 1 |
| 13 | 0.508463 | C | 1 |
| 19 | 0.23758  | C | 1 |
| 13 | 0.648745 | C | 1 |
| 2  | 0.2271   | C | 1 |
| 13 | 0.126399 | C | 1 |
| 19 | 0.23758  | C | 1 |
| 19 | 0.23758  | C | 1 |
| 13 | 0.648745 | C | 1 |
| 13 | 0.508463 | C | 1 |
| 13 | 0.508463 | C | 1 |
| 13 | 0.126399 | C | 1 |
| 18 | 0.223899 | C | 1 |
| 4  | 0.399647 | C | 1 |
| 4  | 0.471203 | C | 1 |
| 12 | 0.550989 | C | 1 |
| 13 | 0.775489 | C | 1 |
| 6  | 0.590858 | C | 1 |

|    |          |   |   |
|----|----------|---|---|
| 19 | 0.477059 | C | 1 |
| 12 | 0.550989 | C | 1 |
| 2  | 0.478913 | C | 1 |
| 18 | 0.223899 | C | 1 |
| 6  | 0.416665 | R | 0 |
| 4  | 0.399647 | C | 1 |
| 12 | 0.550989 | C | 1 |
| 12 | 0.550989 | C | 1 |
| 4  | 0.399647 | C | 1 |
| 4  | 0.399647 | C | 1 |
| 15 | 0.54585  | C | 1 |
| 17 | 0.89653  | C | 1 |
| 18 | 0.223899 | C | 1 |
| 16 | 0.585301 | C | 1 |
| 6  | 0.662605 | C | 1 |
| 6  | 0.416665 | R | 0 |
| 5  | 0.650102 | C | 1 |
| 17 | 0.89653  | C | 1 |
| 13 | 0.775489 | C | 1 |
| 13 | 0.775489 | C | 1 |
| 13 | 0.775489 | C | 1 |
| 13 | 0.775489 | C | 1 |
| 5  | 0.099894 | C | 1 |
| 18 | 0.223899 | C | 1 |
| 12 | 0.550989 | C | 1 |
| 6  | 0.416665 | R | 0 |
| 13 | 0.648745 | C | 1 |
| 6  | 0.565095 | C | 1 |
| 13 | 0.508463 | C | 1 |
| 12 | 0.550989 | C | 1 |
| 18 | 0.223899 | C | 1 |
| 2  | 0.478913 | C | 1 |
| 23 | 0.677975 | C | 1 |
| 6  | 0.247092 | C | 1 |
| 12 | 0.550989 | C | 1 |
| 23 | 0.677975 | C | 1 |
| 6  | 0.590858 | C | 1 |
| 5  | 0.398235 | C | 1 |
| 12 | 0.550989 | C | 1 |
| 5  | 0.650102 | C | 1 |
| 12 | 0.550989 | C | 1 |
| 5  | 0.650102 | C | 1 |
| 16 | 0.585301 | C | 1 |
| 6  | 0.17246  | C | 1 |
| 6  | 0.17246  | C | 1 |
| 17 | 0.510574 | C | 1 |
| 6  | 0.590858 | C | 1 |
| 4  | 0.297453 | C | 1 |
| 12 | 0.550989 | C | 1 |
| 6  | 0.662605 | C | 1 |
| 17 | 0.510574 | C | 1 |
| 6  | 0.590858 | C | 1 |
| 6  | 0.590858 | C | 1 |
| 5  | 0.146409 | C | 1 |



|    |          |   |   |
|----|----------|---|---|
| 17 | 0.430175 | C | 1 |
| 6  | 0.662605 | C | 1 |
| 16 | 0.585301 | C | 1 |
| 5  | 0.099894 | C | 1 |
| 13 | 0.648745 | C | 1 |
| 1  | 0.461856 | N | 0 |
| 6  | 0.17246  | C | 1 |
| 6  | 0.247092 | C | 1 |
| 5  | 0.398235 | C | 1 |
| 17 | 0.430175 | C | 1 |
| 13 | 0.508463 | C | 1 |
| 13 | 0.648745 | C | 1 |
| 17 | 0.89653  | C | 1 |
| 6  | 0.17246  | C | 1 |
| 4  | 0.471203 | C | 1 |
| 5  | 0.650102 | C | 1 |
| 19 | 0.477059 | C | 1 |
| 13 | 0.508463 | C | 1 |
| 1  | 0.461856 | N | 0 |
| 18 | 0.223899 | C | 1 |
| 4  | 0.471203 | C | 1 |
| 2  | 0.2271   | C | 1 |
| 1  | 0.461856 | N | 0 |
| 4  | 0.471203 | C | 1 |
| 6  | 0.662605 | C | 1 |
| 7  | 0.137412 | I | 0 |
| 1  | 0.609201 | C | 1 |
| 1  | 0.609201 | C | 1 |
| 6  | 0.662605 | C | 1 |
| 23 | 0.677975 | C | 1 |
| 5  | 0.146409 | C | 1 |
| 17 | 0.89653  | C | 1 |
| 19 | 0.477059 | C | 1 |
| 12 | 0.550989 | C | 1 |
| 12 | 0.550989 | C | 1 |
| 5  | 0.398235 | C | 1 |
| 19 | 0.477059 | C | 1 |
| 19 | 0.23758  | C | 1 |
| 5  | 0.146409 | C | 1 |
| 13 | 0.508463 | C | 1 |
| 19 | 0.477059 | C | 1 |
| 19 | 0.23758  | C | 1 |
| 18 | 0.223899 | C | 1 |
| 6  | 0.565095 | C | 1 |
| 13 | 0.648745 | C | 1 |
| 5  | 0.398235 | C | 1 |
| 13 | 0.648745 | C | 1 |
| 5  | 0.650102 | C | 1 |
| 6  | 0.416665 | R | 0 |
| 18 | 0.223899 | C | 1 |
| 1  | 0.609201 | C | 1 |
| 13 | 0.775489 | C | 1 |
| 4  | 0.399647 | C | 1 |
| 2  | 0.478913 | C | 1 |

|    |          |   |   |
|----|----------|---|---|
| 2  | 0.478913 | C | 1 |
| 2  | 0.478913 | C | 1 |
| 5  | 0.099894 | C | 1 |
| 13 | 0.508463 | C | 1 |
| 23 | 0.677975 | C | 1 |
| 15 | 0.54585  | C | 1 |
| 7  | 0.137412 | I | 0 |
| 5  | 0.398235 | C | 1 |
| 6  | 0.590858 | C | 1 |
| 12 | 0.550989 | C | 1 |
| 6  | 0.247092 | C | 1 |
| 23 | 0.677975 | C | 1 |
| 6  | 0.662605 | C | 1 |
| 5  | 0.099894 | C | 1 |
| 5  | 0.650102 | C | 1 |
| 12 | 0.550989 | C | 1 |
| 2  | 0.2271   | C | 1 |
| 17 | 0.510574 | C | 1 |
| 5  | 0.146409 | C | 1 |
| 7  | 0.137412 | I | 0 |
| 12 | 0.550989 | C | 1 |
| 6  | 0.662605 | C | 1 |
| 5  | 0.099894 | C | 1 |
| 13 | 0.648745 | C | 1 |
| 13 | 0.648745 | C | 1 |
| 13 | 0.775489 | C | 1 |
| 17 | 0.89653  | C | 1 |
| 18 | 0.223899 | C | 1 |
| 5  | 0.398235 | C | 1 |
| 13 | 0.126399 | C | 1 |
| 1  | 0.461856 | N | 0 |
| 19 | 0.477059 | C | 1 |
| 13 | 0.648745 | C | 1 |
| 6  | 0.662605 | C | 1 |
| 6  | 0.565095 | C | 1 |
| 12 | 0.550989 | C | 1 |
| 6  | 0.590858 | C | 1 |
| 17 | 0.89653  | C | 1 |
| 6  | 0.247092 | C | 1 |
| 6  | 0.17246  | C | 1 |
| 23 | 0.677975 | C | 1 |
| 7  | 0.137412 | I | 0 |
| 13 | 0.126399 | C | 1 |
| 18 | 0.223899 | C | 1 |
| 13 | 0.775489 | C | 1 |
| 15 | 0.54585  | C | 1 |
| 4  | 0.471203 | C | 1 |
| 7  | 0.137412 | I | 0 |
| 6  | 0.416665 | R | 0 |
| 12 | 0.550989 | C | 1 |
| 13 | 0.775489 | C | 1 |
| 13 | 0.648745 | C | 1 |
| 19 | 0.23758  | C | 1 |
| 6  | 0.662605 | C | 1 |

|    |          |   |   |
|----|----------|---|---|
| 17 | 0.89653  | C | 1 |
| 4  | 0.297453 | C | 1 |
| 18 | 0.223899 | C | 1 |
| 5  | 0.099894 | C | 1 |
| 13 | 0.775489 | C | 1 |
| 5  | 0.099894 | C | 1 |
| 19 | 0.923242 | C | 1 |
| 23 | 0.355604 | C | 1 |
| 18 | 0.690959 | C | 1 |
| 19 | 0.526341 | C | 1 |
| 17 | 0.44657  | I | 0 |
| 19 | 0.526341 | C | 1 |
| 18 | 0.712887 | C | 1 |
| 19 | 0.526341 | C | 1 |
| 23 | 0.355604 | C | 1 |
| 18 | 0.690959 | C | 1 |
| 19 | 0.923242 | C | 1 |
| 16 | 0.33139  | C | 1 |
| 17 | 0.44657  | I | 0 |
| 16 | 0.33139  | C | 1 |
| 6  | 0.442816 | C | 1 |
| 18 | 0.712887 | C | 1 |
| 16 | 0.684747 | C | 1 |
| 16 | 0.684747 | C | 1 |
| 6  | 0.442816 | C | 1 |
| 19 | 0.923242 | C | 1 |
| 18 | 0.712887 | C | 1 |
| 19 | 0.923242 | C | 1 |
| 23 | 0.355604 | C | 1 |
| 17 | 0.44657  | I | 0 |
| 18 | 0.690959 | C | 1 |
| 17 | 0.44657  | I | 0 |
| 1  | 0.11745  | C | 1 |
| 18 | 0.690959 | C | 1 |
| 13 | 0.434034 | C | 1 |
| 6  | 0.442816 | C | 1 |
| 13 | 0.434034 | C | 1 |
| 19 | 0.923242 | C | 1 |
| 17 | 0.44657  | I | 0 |
| 19 | 0.923242 | C | 1 |
| 16 | 0.684747 | C | 1 |
| 18 | 0.712887 | C | 1 |
| 18 | 0.712887 | C | 1 |
| 16 | 0.684747 | C | 1 |
| 19 | 0.923242 | C | 1 |
| 18 | 0.712887 | C | 1 |
| 6  | 0.442816 | C | 1 |
| 8  | 0.371283 | C | 1 |
| 19 | 0.923242 | C | 1 |
| 6  | 0.442816 | C | 1 |
| 16 | 0.33139  | C | 1 |
| 6  | 0.442816 | C | 1 |
| 18 | 0.690959 | C | 1 |
| 16 | 0.33139  | C | 1 |

|    |          |   |   |
|----|----------|---|---|
| 18 | 0.712887 | C | 1 |
| 16 | 0.33139  | C | 1 |
| 13 | 0.434034 | C | 1 |
| 18 | 0.712887 | C | 1 |
| 18 | 0.690959 | C | 1 |
| 10 | 0.278553 | C | 1 |
| 23 | 0.355604 | C | 1 |
| 23 | 0.355604 | C | 1 |
| 19 | 0.923242 | C | 1 |
| 17 | 0.44657  | I | 0 |
| 10 | 0.53424  | N | 0 |
| 16 | 0.33139  | C | 1 |
| 10 | 0.53424  | N | 0 |
| 19 | 0.923242 | C | 1 |
| 1  | 0.11745  | C | 1 |
| 23 | 0.355604 | C | 1 |
| 18 | 0.712887 | C | 1 |
| 18 | 0.690959 | C | 1 |
| 18 | 0.690959 | C | 1 |
| 16 | 0.684747 | C | 1 |
| 18 | 0.712887 | C | 1 |
| 23 | 0.355604 | C | 1 |
| 6  | 0.442816 | C | 1 |
| 23 | 0.355604 | C | 1 |
| 19 | 0.526341 | C | 1 |
| 18 | 0.712887 | C | 1 |
| 23 | 0.355604 | C | 1 |
| 10 | 0.53424  | N | 0 |
| 16 | 0.33139  | C | 1 |
| 18 | 0.712887 | C | 1 |
| 17 | 0.483135 | C | 1 |
| 13 | 0.434034 | C | 1 |
| 16 | 0.33139  | C | 1 |
| 17 | 0.44657  | I | 0 |
| 19 | 0.526341 | C | 1 |
| 6  | 0.442816 | C | 1 |
| 10 | 0.278553 | C | 1 |
| 13 | 0.434034 | C | 1 |
| 17 | 0.483135 | C | 1 |
| 17 | 0.483135 | C | 1 |
| 16 | 0.33139  | C | 1 |
| 8  | 0.371283 | C | 1 |
| 17 | 0.483135 | C | 1 |
| 8  | 0.371283 | C | 1 |
| 18 | 0.712887 | C | 1 |
| 16 | 0.684747 | C | 1 |
| 16 | 0.684747 | C | 1 |
| 16 | 0.684747 | C | 1 |
| 16 | 0.684747 | C | 1 |
| 18 | 0.690959 | C | 1 |
| 17 | 0.44657  | I | 0 |
| 17 | 0.483135 | C | 1 |
| 17 | 0.44657  | I | 0 |
| 19 | 0.526341 | C | 1 |

|    |          |   |   |
|----|----------|---|---|
| 16 | 0.33139  | C | 1 |
| 10 | 0.278553 | C | 1 |
| 16 | 0.684747 | C | 1 |
| 19 | 0.923242 | C | 1 |
| 18 | 0.712887 | C | 1 |
| 18 | 0.690959 | C | 1 |
| 17 | 0.44657  | I | 0 |
| 13 | 0.434034 | C | 1 |
| 23 | 0.355604 | C | 1 |
| 16 | 0.33139  | C | 1 |
| 6  | 0.442816 | C | 1 |
| 18 | 0.712887 | C | 1 |
| 18 | 0.690959 | C | 1 |
| 19 | 0.526341 | C | 1 |
| 17 | 0.44657  | I | 0 |
| 6  | 0.442816 | C | 1 |
| 10 | 0.278553 | C | 1 |
| 16 | 0.33139  | C | 1 |
| 18 | 0.690959 | C | 1 |
| 19 | 0.923242 | C | 1 |
| 19 | 0.526341 | C | 1 |
| 1  | 0.11745  | C | 1 |
| 23 | 0.355604 | C | 1 |
| 19 | 0.923242 | C | 1 |
| 13 | 0.434034 | C | 1 |
| 6  | 0.442816 | C | 1 |
| 16 | 0.33139  | C | 1 |
| 1  | 0.11745  | C | 1 |
| 17 | 0.44657  | I | 0 |
| 19 | 0.923242 | C | 1 |
| 1  | 0.11745  | C | 1 |
| 16 | 0.684747 | C | 1 |
| 19 | 0.526341 | C | 1 |
| 18 | 0.609202 | B | 1 |
| 18 | 0.609202 | B | 1 |
| 18 | 0.609202 | B | 1 |
| 20 | 0.598875 | C | 1 |
| 20 | 0.598875 | C | 1 |
| 10 | 0.645206 | C | 1 |
| 10 | 0.645206 | C | 1 |
| 10 | 0.645206 | C | 1 |
| 20 | 0.598875 | C | 1 |
| 20 | 0.598875 | C | 1 |
| 20 | 0.598875 | C | 1 |
| 1  | 0.439224 | C | 1 |
| 1  | 0.439224 | C | 1 |
| 20 | 0.598875 | C | 1 |
| 1  | 0.439224 | C | 1 |
| 10 | 0.645206 | C | 1 |
| 1  | 0.439224 | C | 1 |
| 20 | 0.598875 | C | 1 |
| 10 | 0.645206 | C | 1 |
| 10 | 0.645206 | C | 1 |
| 10 | 0.645206 | C | 1 |

|    |          |   |   |
|----|----------|---|---|
| 20 | 0.598875 | C | 1 |
| 10 | 0.645206 | C | 1 |
| 1  | 0.439224 | C | 1 |
| 10 | 0.645206 | C | 1 |
| 10 | 0.645206 | C | 1 |
| 10 | 0.645206 | C | 1 |
| 12 | 0.656966 | B | 1 |
| 12 | 0.656966 | B | 1 |
| 12 | 0.656966 | B | 1 |
| 12 | 0.656966 | B | 1 |
| 12 | 0.656966 | B | 1 |
| 12 | 0.656966 | B | 1 |
| 12 | 0.656966 | B | 1 |
| 12 | 0.656966 | B | 1 |
| 12 | 0.656966 | B | 1 |
| 12 | 0.656966 | B | 1 |
| 12 | 0.656966 | B | 1 |
| 9  | 0.519974 | C | 1 |
| 9  | 0.519974 | C | 1 |
| 9  | 0.519974 | C | 1 |
| 12 | 0.656966 | B | 1 |
| 12 | 0.656966 | B | 1 |
| 12 | 0.656966 | B | 1 |
| 18 | 0.754481 | C | 1 |
| 18 | 0.754481 | C | 1 |
| 18 | 0.754481 | C | 1 |
| 18 | 0.754481 | C | 1 |
| 18 | 0.754481 | C | 1 |
| 6  | 0.132925 | R | 0 |
| 6  | 0.190723 | C | 1 |
| 6  | 0.190723 | C | 1 |
| 6  | 0.190723 | C | 1 |
| 9  | 0.621308 | C | 1 |
| 17 | 0.717116 | C | 1 |
| 6  | 0.190723 | C | 1 |
| 12 | 0.441462 | C | 1 |
| 6  | 0.190723 | C | 1 |
| 4  | 0.1892   | C | 1 |
| 6  | 0.190723 | C | 1 |
| 20 | 0.215051 | C | 1 |
| 5  | 0.098137 | I | 0 |
| 6  | 0.303042 | C | 1 |
| 6  | 0.6234   | C | 1 |
| 12 | 0.178007 | C | 1 |
| 4  | 0.229677 | Q | 0 |
| 6  | 0.432867 | C | 1 |
| 18 | 0.413445 | C | 1 |
| 22 | 0.589862 | C | 1 |
| 7  | 0.4493   | C | 1 |
| 20 | 0.215051 | C | 1 |
| 6  | 0.432867 | C | 1 |
| 6  | 0.376705 | D | 1 |
| 13 | 0.391831 | C | 1 |
| 8  | 0.451675 | C | 1 |

|    |          |   |   |
|----|----------|---|---|
| 12 | 0.178007 | C | 1 |
| 7  | 0.429727 | I | 0 |
| 6  | 0.407662 | C | 1 |
| 6  | 0.698482 | C | 1 |
| 13 | 0.446517 | I | 0 |
| 6  | 0.245498 | I | 0 |
| 20 | 0.301239 | Q | 0 |
| 9  | 0.621308 | C | 1 |
| 6  | 0.6234   | C | 1 |
| 17 | 0.739025 | S | 0 |
| 7  | 0.387094 | C | 1 |
| 17 | 0.739025 | S | 0 |
| 8  | 0.481028 | C | 1 |
| 7  | 0.230386 | I | 0 |
| 6  | 0.432867 | C | 1 |
| 5  | 0.439043 | C | 1 |
| 6  | 0.407662 | C | 1 |
| 2  | 0.119178 | C | 1 |
| 18 | 0.413445 | C | 1 |
| 7  | 0.387094 | C | 1 |
| 6  | 0.636332 | C | 1 |
| 5  | 0.504552 | N | 0 |
| 7  | 0.4493   | C | 1 |
| 5  | 0.305732 | C | 1 |
| 5  | 0.554717 | Q | 0 |
| 12 | 0.178007 | C | 1 |
| 1  | 0.068284 | C | 1 |
| 5  | 0.098137 | I | 0 |
| 7  | 0.680052 | I | 0 |
| 6  | 0.636332 | C | 1 |
| 12 | 0.311301 | L | 0 |
| 13 | 0.636584 | E | 1 |
| 6  | 0.6234   | C | 1 |
| 12 | 0.311301 | L | 0 |
| 7  | 0.230386 | I | 0 |
| 7  | 0.4493   | C | 1 |
| 12 | 0.311301 | L | 0 |
| 5  | 0.305732 | C | 1 |
| 22 | 0.589862 | C | 1 |
| 7  | 0.429727 | I | 0 |
| 5  | 0.378899 | C | 1 |
| 6  | 0.661655 | C | 1 |
| 12 | 0.441462 | C | 1 |
| 13 | 0.391831 | C | 1 |
| 4  | 0.378595 | I | 0 |
| 6  | 0.309037 | C | 1 |
| 14 | 0.283405 | I | 0 |
| 6  | 0.190723 | C | 1 |
| 19 | 0.414545 | I | 0 |
| 4  | 0.229677 | Q | 0 |
| 4  | 0.378595 | I | 0 |
| 16 | 0.279278 | R | 0 |
| 7  | 0.387094 | C | 1 |
| 5  | 0.305732 | C | 1 |

|    |          |   |   |
|----|----------|---|---|
| 6  | 0.407662 | C | 1 |
| 8  | 0.080775 | I | 0 |
| 5  | 0.439043 | C | 1 |
| 7  | 0.230386 | I | 0 |
| 6  | 0.190723 | C | 1 |
| 10 | 0.110975 | I | 0 |
| 9  | 0.71378  | E | 1 |
| 7  | 0.429727 | I | 0 |
| 17 | 0.717116 | C | 1 |
| 23 | 0.685171 | F | 0 |
| 22 | 0.589862 | C | 1 |
| 5  | 0.098137 | I | 0 |
| 7  | 0.387094 | C | 1 |
| 23 | 0.685171 | F | 0 |
| 9  | 0.71378  | E | 1 |
| 17 | 0.739025 | S | 0 |
| 1  | 0.47383  | C | 1 |
| 1  | 0.134932 | C | 1 |
| 6  | 0.376705 | D | 1 |
| 22 | 0.589862 | C | 1 |
| 8  | 0.451675 | C | 1 |
| 6  | 0.6234   | C | 1 |
| 6  | 0.432867 | C | 1 |
| 6  | 0.6234   | C | 1 |
| 6  | 0.432867 | C | 1 |
| 6  | 0.6234   | C | 1 |
| 6  | 0.309037 | C | 1 |
| 6  | 0.636332 | C | 1 |
| 12 | 0.441462 | C | 1 |
| 23 | 0.685171 | F | 0 |
| 12 | 0.441462 | C | 1 |
| 4  | 0.378595 | I | 0 |
| 1  | 0.250928 | C | 1 |
| 6  | 0.698482 | C | 1 |
| 6  | 0.245498 | I | 0 |
| 9  | 0.296187 | C | 1 |
| 19 | 0.414545 | I | 0 |
| 4  | 0.378595 | I | 0 |
| 6  | 0.661655 | C | 1 |
| 5  | 0.098137 | I | 0 |
| 5  | 0.439043 | C | 1 |
| 6  | 0.407662 | C | 1 |
| 15 | 0.445078 | C | 1 |
| 8  | 0.217654 | C | 1 |
| 19 | 0.414545 | I | 0 |
| 5  | 0.439043 | C | 1 |
| 23 | 0.685171 | F | 0 |
| 6  | 0.407662 | C | 1 |
| 12 | 0.441462 | C | 1 |
| 5  | 0.439043 | C | 1 |
| 4  | 0.1892   | C | 1 |
| 7  | 0.387094 | C | 1 |
| 6  | 0.661655 | C | 1 |
| 6  | 0.551447 | C | 1 |



|    |          |   |   |
|----|----------|---|---|
| 6  | 0.376705 | D | 1 |
| 14 | 0.283405 | I | 0 |
| 6  | 0.432867 | C | 1 |
| 9  | 0.621308 | C | 1 |
| 18 | 0.413445 | C | 1 |
| 6  | 0.551447 | C | 1 |
| 7  | 0.429727 | I | 0 |
| 5  | 0.439043 | C | 1 |
| 2  | 0.119178 | C | 1 |
| 20 | 0.326604 | R | 0 |
| 6  | 0.097375 | C | 1 |
| 8  | 0.451675 | C | 1 |
| 5  | 0.473077 | C | 1 |
| 4  | 0.1892   | C | 1 |
| 5  | 0.504552 | N | 0 |
| 7  | 0.230386 | I | 0 |
| 20 | 0.326604 | R | 0 |
| 5  | 0.504552 | N | 0 |
| 1  | 0.068284 | C | 1 |
| 6  | 0.432867 | C | 1 |
| 14 | 0.283405 | I | 0 |
| 7  | 0.429727 | I | 0 |
| 5  | 0.098137 | I | 0 |
| 8  | 0.080775 | I | 0 |
| 6  | 0.097375 | C | 1 |
| 20 | 0.326604 | R | 0 |
| 19 | 0.414545 | I | 0 |
| 5  | 0.473077 | C | 1 |
| 6  | 0.6234   | C | 1 |
| 20 | 0.215051 | C | 1 |
| 6  | 0.551447 | C | 1 |
| 6  | 0.661655 | C | 1 |
| 13 | 0.391831 | C | 1 |
| 4  | 0.229677 | Q | 0 |
| 6  | 0.097375 | C | 1 |
| 7  | 0.4493   | C | 1 |
| 6  | 0.432867 | C | 1 |
| 8  | 0.080775 | I | 0 |
| 6  | 0.097375 | C | 1 |
| 6  | 0.097375 | C | 1 |
| 5  | 0.378899 | C | 1 |
| 13 | 0.446517 | I | 0 |
| 13 | 0.636584 | E | 1 |
| 17 | 0.717116 | C | 1 |
| 23 | 0.685171 | F | 0 |
| 7  | 0.4493   | C | 1 |
| 6  | 0.551447 | C | 1 |
| 12 | 0.441462 | C | 1 |
| 13 | 0.391831 | C | 1 |
| 23 | 0.685171 | F | 0 |
| 19 | 0.414545 | I | 0 |
| 19 | 0.414545 | I | 0 |
| 6  | 0.356958 | C | 1 |
| 5  | 0.098137 | I | 0 |

|    |          |   |   |
|----|----------|---|---|
| 5  | 0.185389 | C | 1 |
| 1  | 0.250928 | C | 1 |
| 6  | 0.303042 | C | 1 |
| 12 | 0.178007 | C | 1 |
| 1  | 0.25161  | L | 0 |
| 12 | 0.441462 | C | 1 |
| 6  | 0.636332 | C | 1 |
| 6  | 0.407662 | C | 1 |
| 6  | 0.097375 | C | 1 |
| 6  | 0.190723 | C | 1 |
| 1  | 0.47383  | C | 1 |
| 6  | 0.432867 | C | 1 |
| 6  | 0.6234   | C | 1 |
| 6  | 0.636332 | C | 1 |
| 20 | 0.326604 | R | 0 |
| 5  | 0.504552 | N | 0 |
| 6  | 0.190723 | C | 1 |
| 6  | 0.698482 | C | 1 |
| 6  | 0.551447 | C | 1 |
| 13 | 0.636584 | E | 1 |
| 6  | 0.407662 | C | 1 |
| 12 | 0.311301 | L | 0 |
| 9  | 0.296187 | C | 1 |
| 5  | 0.504552 | N | 0 |
| 1  | 0.068284 | C | 1 |
| 1  | 0.314236 | C | 1 |
| 6  | 0.190723 | C | 1 |
| 12 | 0.178007 | C | 1 |
| 6  | 0.376705 | D | 1 |
| 22 | 0.589862 | C | 1 |
| 6  | 0.309037 | C | 1 |
| 8  | 0.481028 | C | 1 |
| 13 | 0.636584 | E | 1 |
| 14 | 0.283405 | I | 0 |
| 5  | 0.608029 | C | 1 |
| 9  | 0.71378  | E | 1 |
| 5  | 0.439043 | C | 1 |
| 6  | 0.303042 | C | 1 |
| 4  | 0.1892   | C | 1 |
| 5  | 0.554717 | Q | 0 |
| 5  | 0.554717 | Q | 0 |
| 5  | 0.608029 | C | 1 |
| 6  | 0.636332 | C | 1 |
| 5  | 0.439043 | C | 1 |
| 6  | 0.132925 | R | 0 |
| 1  | 0.068284 | C | 1 |
| 22 | 0.589862 | C | 1 |
| 6  | 0.303042 | C | 1 |
| 7  | 0.429727 | I | 0 |
| 23 | 0.685171 | F | 0 |
| 12 | 0.441462 | C | 1 |
| 6  | 0.097375 | C | 1 |
| 8  | 0.217654 | C | 1 |
| 6  | 0.190723 | C | 1 |

|    |          |   |   |
|----|----------|---|---|
| 7  | 0.230386 | I | 0 |
| 16 | 0.471388 | F | 0 |
| 17 | 0.717116 | C | 1 |
| 7  | 0.429727 | I | 0 |
| 1  | 0.47383  | C | 1 |
| 22 | 0.589862 | C | 1 |
| 6  | 0.551447 | C | 1 |
| 20 | 0.215051 | C | 1 |
| 5  | 0.516049 | C | 1 |
| 1  | 0.47383  | C | 1 |
| 1  | 0.47383  | C | 1 |
| 6  | 0.190723 | C | 1 |
| 5  | 0.504552 | N | 0 |
| 20 | 0.301239 | Q | 0 |
| 5  | 0.378899 | C | 1 |
| 1  | 0.250928 | C | 1 |
| 6  | 0.6234   | C | 1 |
| 9  | 0.621308 | C | 1 |
| 6  | 0.309037 | C | 1 |
| 20 | 0.215051 | C | 1 |
| 5  | 0.504552 | N | 0 |
| 20 | 0.215051 | C | 1 |
| 12 | 0.178007 | C | 1 |
| 9  | 0.71378  | E | 1 |
| 5  | 0.516049 | C | 1 |
| 5  | 0.516049 | C | 1 |
| 5  | 0.516049 | C | 1 |
| 13 | 0.391831 | C | 1 |
| 16 | 0.279278 | R | 0 |
| 9  | 0.621308 | C | 1 |
| 13 | 0.391831 | C | 1 |
| 8  | 0.451675 | C | 1 |
| 5  | 0.608029 | C | 1 |
| 5  | 0.098137 | I | 0 |
| 16 | 0.471388 | F | 0 |
| 6  | 0.6234   | C | 1 |
| 1  | 0.068284 | C | 1 |
| 6  | 0.303042 | C | 1 |
| 5  | 0.473077 | C | 1 |
| 6  | 0.6234   | C | 1 |
| 19 | 0.414545 | I | 0 |
| 7  | 0.680052 | I | 0 |
| 6  | 0.303042 | C | 1 |
| 13 | 0.391831 | C | 1 |
| 5  | 0.608029 | C | 1 |
| 8  | 0.481028 | C | 1 |
| 6  | 0.6234   | C | 1 |
| 5  | 0.098137 | I | 0 |
| 16 | 0.279278 | R | 0 |
| 5  | 0.554717 | Q | 0 |
| 4  | 0.378595 | I | 0 |
| 12 | 0.311301 | L | 0 |
| 17 | 0.739025 | S | 0 |
| 6  | 0.245498 | I | 0 |

|    |          |   |   |
|----|----------|---|---|
| 7  | 0.429727 | I | 0 |
| 2  | 0.271409 | C | 1 |
| 2  | 0.271409 | C | 1 |
| 1  | 0.332519 | I | 0 |
| 9  | 0.296187 | C | 1 |
| 8  | 0.481028 | C | 1 |
| 9  | 0.621308 | C | 1 |
| 19 | 0.414545 | I | 0 |
| 8  | 0.080775 | I | 0 |
| 22 | 0.589862 | C | 1 |
| 6  | 0.376705 | D | 1 |
| 20 | 0.215051 | C | 1 |
| 2  | 0.271409 | C | 1 |
| 17 | 0.717116 | C | 1 |
| 6  | 0.432867 | C | 1 |
| 7  | 0.4493   | C | 1 |
| 18 | 0.413445 | C | 1 |
| 6  | 0.432867 | C | 1 |
| 22 | 0.589862 | C | 1 |
| 6  | 0.309037 | C | 1 |
| 5  | 0.185389 | C | 1 |
| 8  | 0.451675 | C | 1 |
| 6  | 0.432867 | C | 1 |
| 6  | 0.376705 | D | 1 |
| 8  | 0.451675 | C | 1 |
| 4  | 0.1892   | C | 1 |
| 5  | 0.473077 | C | 1 |
| 6  | 0.190723 | C | 1 |
| 6  | 0.097375 | C | 1 |
| 6  | 0.303042 | C | 1 |
| 7  | 0.429727 | I | 0 |
| 12 | 0.178007 | C | 1 |
| 13 | 0.446517 | I | 0 |
| 16 | 0.471388 | F | 0 |
| 15 | 0.445078 | C | 1 |
| 5  | 0.608029 | C | 1 |
| 5  | 0.185389 | C | 1 |
| 9  | 0.621308 | C | 1 |
| 7  | 0.429727 | I | 0 |
| 6  | 0.432867 | C | 1 |
| 6  | 0.432867 | C | 1 |
| 1  | 0.068284 | C | 1 |
| 5  | 0.504552 | N | 0 |
| 9  | 0.621308 | C | 1 |
| 13 | 0.391831 | C | 1 |
| 5  | 0.554717 | Q | 0 |
| 4  | 0.378595 | I | 0 |
| 6  | 0.407662 | C | 1 |
| 9  | 0.71378  | E | 1 |
| 15 | 0.445078 | C | 1 |
| 7  | 0.387094 | C | 1 |
| 10 | 0.110975 | I | 0 |
| 23 | 0.685171 | F | 0 |
| 6  | 0.698482 | C | 1 |

|    |          |   |   |
|----|----------|---|---|
| 1  | 0.134932 | C | 1 |
| 8  | 0.451675 | C | 1 |
| 20 | 0.326604 | R | 0 |
| 5  | 0.504552 | N | 0 |
| 12 | 0.441462 | C | 1 |
| 1  | 0.167436 | C | 1 |
| 8  | 0.451675 | C | 1 |
| 6  | 0.245498 | I | 0 |
| 15 | 0.445078 | C | 1 |
| 1  | 0.47383  | C | 1 |
| 2  | 0.271409 | C | 1 |
| 18 | 0.413445 | C | 1 |
| 6  | 0.407662 | C | 1 |
| 6  | 0.432867 | C | 1 |
| 13 | 0.636584 | E | 1 |
| 6  | 0.432867 | C | 1 |
| 12 | 0.178007 | C | 1 |
| 6  | 0.303042 | C | 1 |
| 5  | 0.608029 | C | 1 |
| 7  | 0.429727 | I | 0 |
| 5  | 0.554717 | Q | 0 |
| 6  | 0.376705 | D | 1 |
| 22 | 0.589862 | C | 1 |
| 5  | 0.516049 | C | 1 |
| 5  | 0.098137 | I | 0 |
| 6  | 0.303042 | C | 1 |
| 5  | 0.608029 | C | 1 |
| 5  | 0.098137 | I | 0 |
| 1  | 0.167436 | C | 1 |
| 6  | 0.245498 | I | 0 |
| 7  | 0.429727 | I | 0 |
| 5  | 0.378899 | C | 1 |
| 6  | 0.190723 | C | 1 |
| 22 | 0.589862 | C | 1 |
| 22 | 0.589862 | C | 1 |
| 5  | 0.554717 | Q | 0 |
| 5  | 0.554717 | Q | 0 |
| 23 | 0.685171 | F | 0 |
| 22 | 0.589862 | C | 1 |
| 6  | 0.356958 | C | 1 |
| 9  | 0.296187 | C | 1 |
| 7  | 0.387094 | C | 1 |
| 5  | 0.608029 | C | 1 |
| 8  | 0.451675 | C | 1 |
| 1  | 0.134932 | C | 1 |
| 15 | 0.445078 | C | 1 |
| 7  | 0.387094 | C | 1 |
| 12 | 0.311301 | L | 0 |
| 12 | 0.311301 | L | 0 |
| 5  | 0.504552 | N | 0 |
| 4  | 0.1892   | C | 1 |
| 6  | 0.303042 | C | 1 |
| 9  | 0.296187 | C | 1 |
| 1  | 0.332519 | I | 0 |

|    |          |   |   |
|----|----------|---|---|
| 6  | 0.356958 | C | 1 |
| 15 | 0.445078 | C | 1 |
| 18 | 0.413445 | C | 1 |
| 9  | 0.621308 | C | 1 |
| 6  | 0.245498 | I | 0 |
| 7  | 0.230386 | I | 0 |
| 2  | 0.119178 | C | 1 |
| 13 | 0.391831 | C | 1 |
| 7  | 0.680052 | I | 0 |
| 1  | 0.332519 | I | 0 |
| 6  | 0.432867 | C | 1 |
| 5  | 0.439043 | C | 1 |
| 6  | 0.636332 | C | 1 |
| 5  | 0.439043 | C | 1 |
| 5  | 0.378899 | C | 1 |
| 14 | 0.283405 | I | 0 |
| 23 | 0.685171 | F | 0 |
| 9  | 0.296187 | C | 1 |
| 8  | 0.451675 | C | 1 |
| 5  | 0.504552 | N | 0 |
| 6  | 0.6234   | C | 1 |
| 9  | 0.71378  | E | 1 |
| 4  | 0.378595 | I | 0 |
| 7  | 0.429727 | I | 0 |
| 6  | 0.6234   | C | 1 |
| 5  | 0.554717 | Q | 0 |
| 23 | 0.685171 | F | 0 |
| 6  | 0.698482 | C | 1 |
| 1  | 0.134932 | C | 1 |
| 6  | 0.551447 | C | 1 |
| 17 | 0.717116 | C | 1 |
| 6  | 0.432867 | C | 1 |
| 6  | 0.661655 | C | 1 |
| 22 | 0.589862 | C | 1 |
| 6  | 0.309037 | C | 1 |
| 5  | 0.554717 | Q | 0 |
| 5  | 0.504552 | N | 0 |
| 8  | 0.451675 | C | 1 |
| 6  | 0.636332 | C | 1 |
| 13 | 0.391831 | C | 1 |
| 13 | 0.391831 | C | 1 |
| 1  | 0.134932 | C | 1 |
| 23 | 0.685171 | F | 0 |
| 17 | 0.717116 | C | 1 |
| 10 | 0.110975 | I | 0 |
| 5  | 0.554717 | Q | 0 |
| 5  | 0.439043 | C | 1 |
| 2  | 0.271409 | C | 1 |
| 5  | 0.608029 | C | 1 |
| 4  | 0.1892   | C | 1 |
| 5  | 0.439043 | C | 1 |
| 6  | 0.190723 | C | 1 |
| 6  | 0.245498 | I | 0 |
| 8  | 0.451675 | C | 1 |

|    |          |   |   |
|----|----------|---|---|
| 12 | 0.311301 | L | 0 |
| 12 | 0.441462 | C | 1 |
| 5  | 0.378899 | C | 1 |
| 18 | 0.413445 | C | 1 |
| 8  | 0.080775 | I | 0 |
| 12 | 0.311301 | L | 0 |
| 6  | 0.698482 | C | 1 |
| 7  | 0.429727 | I | 0 |
| 16 | 0.471388 | F | 0 |
| 14 | 0.283405 | I | 0 |
| 7  | 0.429727 | I | 0 |
| 8  | 0.481028 | C | 1 |
| 12 | 0.311301 | L | 0 |
| 22 | 0.589862 | C | 1 |
| 12 | 0.311301 | L | 0 |
| 13 | 0.636584 | E | 1 |
| 15 | 0.445078 | C | 1 |
| 18 | 0.413445 | C | 1 |
| 7  | 0.429727 | I | 0 |
| 1  | 0.068284 | C | 1 |
| 7  | 0.429727 | I | 0 |
| 6  | 0.132925 | R | 0 |
| 2  | 0.119178 | C | 1 |
| 6  | 0.407662 | C | 1 |
| 2  | 0.119178 | C | 1 |
| 6  | 0.245498 | I | 0 |
| 6  | 0.245498 | I | 0 |
| 6  | 0.245498 | I | 0 |
| 7  | 0.680052 | I | 0 |
| 7  | 0.680052 | I | 0 |
| 4  | 0.1892   | C | 1 |
| 22 | 0.589862 | C | 1 |
| 22 | 0.589862 | C | 1 |
| 12 | 0.311301 | L | 0 |
| 22 | 0.589862 | C | 1 |
| 5  | 0.504552 | N | 0 |
| 5  | 0.473077 | C | 1 |
| 13 | 0.446517 | I | 0 |
| 8  | 0.451675 | C | 1 |
| 23 | 0.685171 | F | 0 |
| 17 | 0.717116 | C | 1 |
| 6  | 0.309037 | C | 1 |
| 5  | 0.516049 | C | 1 |
| 6  | 0.097375 | C | 1 |
| 16 | 0.471388 | F | 0 |
| 22 | 0.589862 | C | 1 |
| 16 | 0.471388 | F | 0 |
| 1  | 0.25161  | L | 0 |
| 7  | 0.429727 | I | 0 |
| 16 | 0.279278 | R | 0 |
| 17 | 0.739025 | S | 0 |
| 9  | 0.71378  | E | 1 |
| 5  | 0.439043 | C | 1 |
| 6  | 0.698482 | C | 1 |

|    |          |   |   |
|----|----------|---|---|
| 6  | 0.303042 | C | 1 |
| 7  | 0.230386 | I | 0 |
| 6  | 0.303042 | C | 1 |
| 6  | 0.303042 | C | 1 |
| 6  | 0.097375 | C | 1 |
| 7  | 0.4493   | C | 1 |
| 6  | 0.309037 | C | 1 |
| 6  | 0.309037 | C | 1 |
| 13 | 0.391831 | C | 1 |
| 2  | 0.119178 | C | 1 |
| 15 | 0.445078 | C | 1 |
| 6  | 0.303042 | C | 1 |
| 1  | 0.332519 | I | 0 |
| 7  | 0.230386 | I | 0 |
| 5  | 0.439043 | C | 1 |
| 5  | 0.439043 | C | 1 |
| 13 | 0.446517 | I | 0 |
| 9  | 0.296187 | C | 1 |
| 8  | 0.080775 | I | 0 |
| 13 | 0.446517 | I | 0 |
| 4  | 0.1892   | C | 1 |
| 8  | 0.217654 | C | 1 |
| 8  | 0.080775 | I | 0 |
| 20 | 0.301239 | Q | 0 |
| 13 | 0.446517 | I | 0 |
| 20 | 0.215051 | C | 1 |
| 14 | 0.283405 | I | 0 |
| 14 | 0.283405 | I | 0 |
| 5  | 0.185389 | C | 1 |
| 5  | 0.378899 | C | 1 |
| 2  | 0.271409 | C | 1 |
| 8  | 0.481028 | C | 1 |
| 6  | 0.636332 | C | 1 |
| 20 | 0.301239 | Q | 0 |
| 4  | 0.229677 | Q | 0 |
| 16 | 0.471388 | F | 0 |
| 1  | 0.167436 | C | 1 |
| 6  | 0.309037 | C | 1 |
| 15 | 0.445078 | C | 1 |
| 17 | 0.717116 | C | 1 |
| 5  | 0.516049 | C | 1 |
| 12 | 0.441462 | C | 1 |
| 7  | 0.230386 | I | 0 |
| 17 | 0.717116 | C | 1 |
| 1  | 0.314236 | C | 1 |
| 16 | 0.279278 | R | 0 |
| 6  | 0.097375 | C | 1 |
| 6  | 0.551447 | C | 1 |
| 5  | 0.473077 | C | 1 |
| 1  | 0.250928 | C | 1 |
| 8  | 0.481028 | C | 1 |
| 5  | 0.378899 | C | 1 |
| 6  | 0.551447 | C | 1 |
| 6  | 0.190723 | C | 1 |



|    |          |   |   |
|----|----------|---|---|
| 14 | 0.283405 | I | 0 |
| 5  | 0.473077 | C | 1 |
| 16 | 0.279278 | R | 0 |
| 12 | 0.178007 | C | 1 |
| 12 | 0.441462 | C | 1 |
| 6  | 0.6234   | C | 1 |
| 9  | 0.296187 | C | 1 |
| 13 | 0.636584 | E | 1 |
| 2  | 0.271409 | C | 1 |
| 13 | 0.391831 | C | 1 |
| 5  | 0.554717 | Q | 0 |
| 6  | 0.551447 | C | 1 |
| 7  | 0.387094 | C | 1 |
| 6  | 0.551447 | C | 1 |
| 5  | 0.504552 | N | 0 |
| 6  | 0.551447 | C | 1 |
| 14 | 0.283405 | I | 0 |
| 7  | 0.230386 | I | 0 |
| 6  | 0.6234   | C | 1 |
| 8  | 0.217654 | C | 1 |
| 7  | 0.387094 | C | 1 |
| 7  | 0.387094 | C | 1 |
| 1  | 0.250928 | C | 1 |
| 7  | 0.4493   | C | 1 |
| 8  | 0.481028 | C | 1 |
| 12 | 0.311301 | L | 0 |
| 5  | 0.554717 | Q | 0 |
| 1  | 0.314236 | C | 1 |
| 1  | 0.332519 | I | 0 |
| 7  | 0.429727 | I | 0 |
| 6  | 0.303042 | C | 1 |
| 5  | 0.439043 | C | 1 |
| 19 | 0.414545 | I | 0 |
| 6  | 0.432867 | C | 1 |
| 12 | 0.441462 | C | 1 |
| 6  | 0.407662 | C | 1 |
| 7  | 0.429727 | I | 0 |
| 6  | 0.6234   | C | 1 |
| 6  | 0.376705 | D | 1 |
| 1  | 0.250928 | C | 1 |
| 13 | 0.446517 | I | 0 |
| 20 | 0.215051 | C | 1 |
| 7  | 0.387094 | C | 1 |
| 8  | 0.481028 | C | 1 |
| 1  | 0.068284 | C | 1 |
| 16 | 0.471388 | F | 0 |
| 8  | 0.451675 | C | 1 |
| 15 | 0.445078 | C | 1 |
| 15 | 0.445078 | C | 1 |
| 1  | 0.134932 | C | 1 |
| 1  | 0.068284 | C | 1 |
| 12 | 0.311301 | L | 0 |
| 23 | 0.685171 | F | 0 |
| 15 | 0.445078 | C | 1 |

|    |          |   |   |
|----|----------|---|---|
| 6  | 0.698482 | C | 1 |
| 8  | 0.481028 | C | 1 |
| 6  | 0.6234   | C | 1 |
| 7  | 0.4493   | C | 1 |
| 5  | 0.098137 | I | 0 |
| 6  | 0.407662 | C | 1 |
| 14 | 0.283405 | I | 0 |
| 5  | 0.185389 | C | 1 |
| 9  | 0.296187 | C | 1 |
| 9  | 0.621308 | C | 1 |
| 5  | 0.516049 | C | 1 |
| 4  | 0.1892   | C | 1 |
| 2  | 0.119178 | C | 1 |
| 7  | 0.230386 | I | 0 |
| 6  | 0.432867 | C | 1 |
| 23 | 0.685171 | F | 0 |
| 8  | 0.217654 | C | 1 |
| 6  | 0.6234   | C | 1 |
| 4  | 0.229677 | Q | 0 |
| 1  | 0.25161  | L | 0 |
| 13 | 0.636584 | E | 1 |
| 6  | 0.698482 | C | 1 |
| 23 | 0.685171 | F | 0 |
| 7  | 0.387094 | C | 1 |
| 23 | 0.570183 | C | 1 |
| 12 | 0.385937 | C | 1 |
| 23 | 0.570183 | C | 1 |
| 23 | 0.570183 | C | 1 |
| 9  | 0.777295 | C | 1 |
| 23 | 0.570183 | C | 1 |
| 9  | 0.777295 | C | 1 |
| 23 | 0.570183 | C | 1 |
| 12 | 0.385937 | C | 1 |
| 23 | 0.570183 | C | 1 |
| 12 | 0.385937 | C | 1 |
| 12 | 0.385937 | C | 1 |
| 12 | 0.385937 | C | 1 |
| 12 | 0.385937 | C | 1 |
| 12 | 0.385937 | C | 1 |
| 23 | 0.570183 | C | 1 |
| 23 | 0.570183 | C | 1 |
| 23 | 0.570183 | C | 1 |
| 23 | 0.570183 | C | 1 |
| 23 | 0.570183 | C | 1 |
| 23 | 0.570183 | C | 1 |
| 9  | 0.777295 | C | 1 |
| 12 | 0.385937 | C | 1 |
| 23 | 0.570183 | C | 1 |
| 23 | 0.570183 | C | 1 |
| 23 | 0.570183 | C | 1 |
| 23 | 0.570183 | C | 1 |
| 12 | 0.385937 | C | 1 |
| 5  | 0.512811 | C | 1 |
| 5  | 0.370483 | C | 1 |

|    |          |   |   |
|----|----------|---|---|
| 12 | 0.923242 | C | 1 |
| 5  | 0.512811 | C | 1 |
| 12 | 0.312725 | C | 1 |
| 12 | 0.923242 | C | 1 |
| 14 | 0.634399 | C | 1 |
| 12 | 0.312725 | C | 1 |
| 5  | 0.512811 | C | 1 |
| 12 | 0.312725 | C | 1 |
| 12 | 0.312725 | C | 1 |
| 12 | 0.312725 | C | 1 |
| 6  | 0.358757 | C | 1 |
| 5  | 0.370483 | C | 1 |
| 5  | 0.512811 | C | 1 |
| 14 | 0.634399 | C | 1 |
| 12 | 0.312725 | C | 1 |
| 5  | 0.512811 | C | 1 |
| 14 | 0.634399 | C | 1 |
| 5  | 0.512811 | C | 1 |
| 5  | 0.512811 | C | 1 |
| 5  | 0.370483 | C | 1 |
| 5  | 0.370483 | C | 1 |
| 6  | 0.358757 | C | 1 |
| 14 | 0.634399 | C | 1 |
| 6  | 0.358757 | C | 1 |
| 6  | 0.358757 | C | 1 |
| 5  | 0.370483 | C | 1 |
| 12 | 0.312725 | C | 1 |
| 5  | 0.512811 | C | 1 |
| 5  | 0.370483 | C | 1 |
| 14 | 0.634399 | C | 1 |
| 12 | 0.312725 | C | 1 |
| 5  | 0.370483 | C | 1 |
| 12 | 0.923242 | C | 1 |
| 5  | 0.370483 | C | 1 |
| 6  | 0.358757 | C | 1 |
| 6  | 0.358757 | C | 1 |
| 14 | 0.634399 | C | 1 |
| 6  | 0.358757 | C | 1 |
| 12 | 0.312725 | C | 1 |
| 6  | 0.358757 | C | 1 |
| 5  | 0.512811 | C | 1 |
| 14 | 0.634399 | C | 1 |
| 12 | 0.312725 | C | 1 |
| 12 | 0.312725 | C | 1 |
| 9  | 0.652109 | C | 1 |
| 2  | 0.409972 | C | 1 |
| 9  | 0.424385 | I | 0 |
| 2  | 0.409972 | C | 1 |
| 9  | 0.424385 | I | 0 |
| 2  | 0.409972 | C | 1 |
| 9  | 0.652109 | C | 1 |
| 7  | 0.154802 | C | 1 |
| 7  | 0.154802 | C | 1 |
| 9  | 0.424385 | I | 0 |

|               |   |
|---------------|---|
| 2 0.409972 C  | 1 |
| 9 0.424385 I  | 0 |
| 7 0.154802 C  | 1 |
| 9 0.652109 C  | 1 |
| 7 0.154802 C  | 1 |
| 7 0.154802 C  | 1 |
| 7 0.154802 C  | 1 |
| 2 0.409972 C  | 1 |
| 2 0.409972 C  | 1 |
| 2 0.409972 C  | 1 |
| 9 0.424385 I  | 0 |
| 9 0.424385 I  | 0 |
| 7 0.154802 C  | 1 |
| 7 0.154802 C  | 1 |
| 7 0.154802 C  | 1 |
| 2 0.409972 C  | 1 |
| 7 0.154802 C  | 1 |
| 7 0.353374 C  | 1 |
| 7 0.353374 C  | 1 |
| 7 0.353374 C  | 1 |
| 8 0.304332 C  | 1 |
| 9 0.104054 C  | 1 |
| 8 0.304332 C  | 1 |
| 9 0.104054 C  | 1 |
| 1 0.514088 C  | 1 |
| 9 0.104054 C  | 1 |
| 8 0.304332 C  | 1 |
| 7 0.353374 C  | 1 |
| 1 0.514088 C  | 1 |
| 1 0.514088 C  | 1 |
| 1 0.514088 C  | 1 |
| 7 0.353374 C  | 1 |
| 9 0.104054 C  | 1 |
| 8 0.304332 C  | 1 |
| 9 0.104054 C  | 1 |
| 9 0.104054 C  | 1 |
| 1 0.514088 C  | 1 |
| 7 0.353374 C  | 1 |
| 7 0.353374 C  | 1 |
| 9 0.104054 C  | 1 |
| 1 0.514088 C  | 1 |
| 8 0.304332 C  | 1 |
| 8 0.304332 C  | 1 |
| 7 0.353374 C  | 1 |
| 16 0.179372 C | 1 |
| 20 0.132475 I | 0 |
| 16 0.179372 C | 1 |
| 16 0.179372 C | 1 |
| 20 0.132475 I | 0 |
| 20 0.132475 I | 0 |
| 20 0.132475 I | 0 |
| 16 0.179372 C | 1 |
| 20 0.132475 I | 0 |
| 7 0.395116 C  | 1 |

|    |          |   |   |
|----|----------|---|---|
| 15 | 0.673274 | C | 1 |
| 12 | 0.192202 | F | 0 |
| 5  | 0.250858 | F | 0 |
| 6  | 0.689883 | F | 0 |
| 6  | 0.199447 | C | 1 |
| 6  | 0.404958 | K | 1 |
| 21 | 0.549664 | C | 1 |
| 16 | 0.146613 | C | 1 |
| 16 | 0.146613 | C | 1 |
| 19 | 0.676414 | E | 1 |
| 5  | 0.420669 | C | 1 |
| 7  | 0.395116 | C | 1 |
| 19 | 0.54659  | C | 1 |
| 19 | 0.54659  | C | 1 |
| 16 | 0.146613 | C | 1 |
| 19 | 0.676414 | E | 1 |
| 7  | 0.078578 | C | 1 |
| 6  | 0.199447 | C | 1 |
| 7  | 0.078578 | C | 1 |
| 20 | 0.301956 | C | 1 |
| 18 | 0.718388 | C | 1 |
| 9  | 0.216754 | C | 1 |
| 19 | 0.54659  | C | 1 |
| 19 | 0.676414 | E | 1 |
| 19 | 0.676414 | E | 1 |
| 17 | 0.68962  | D | 1 |
| 6  | 0.689883 | F | 0 |
| 18 | 0.892738 | E | 1 |
| 15 | 0.673274 | C | 1 |
| 19 | 0.54659  | C | 1 |
| 17 | 0.68962  | D | 1 |
| 15 | 0.673274 | C | 1 |
| 21 | 0.549664 | C | 1 |
| 4  | 0.497851 | C | 1 |
| 6  | 0.689883 | F | 0 |
| 18 | 0.718388 | C | 1 |
| 16 | 0.417369 | C | 1 |
| 6  | 0.175585 | C | 1 |
| 19 | 0.54659  | C | 1 |
| 12 | 0.429502 | F | 0 |
| 12 | 0.192202 | F | 0 |
| 17 | 0.68962  | D | 1 |
| 15 | 0.673274 | C | 1 |
| 5  | 0.335395 | C | 1 |
| 5  | 0.420669 | C | 1 |
| 7  | 0.078578 | C | 1 |
| 19 | 0.54659  | C | 1 |
| 18 | 0.718388 | C | 1 |
| 16 | 0.146613 | C | 1 |
| 12 | 0.192202 | F | 0 |
| 5  | 0.250858 | F | 0 |
| 21 | 0.549664 | C | 1 |
| 19 | 0.54659  | C | 1 |
| 16 | 0.146613 | C | 1 |

|    |          |   |   |
|----|----------|---|---|
| 21 | 0.549664 | C | 1 |
| 19 | 0.54659  | C | 1 |
| 14 | 0.292886 | C | 1 |
| 15 | 0.673274 | C | 1 |
| 5  | 0.420669 | C | 1 |
| 19 | 0.676414 | E | 1 |
| 16 | 0.417369 | C | 1 |
| 19 | 0.676414 | E | 1 |
| 14 | 0.292886 | C | 1 |
| 16 | 0.146613 | C | 1 |
| 14 | 0.292886 | C | 1 |
| 23 | 0.374951 | D | 1 |
| 16 | 0.146613 | C | 1 |
| 6  | 0.175585 | C | 1 |
| 16 | 0.417369 | C | 1 |
| 7  | 0.395116 | C | 1 |
| 14 | 0.292886 | C | 1 |
| 21 | 0.549664 | C | 1 |
| 19 | 0.54659  | C | 1 |
| 21 | 0.549664 | C | 1 |
| 20 | 0.301956 | C | 1 |
| 5  | 0.250858 | F | 0 |
| 12 | 0.429502 | F | 0 |
| 16 | 0.417369 | C | 1 |
| 6  | 0.175585 | C | 1 |
| 19 | 0.54659  | C | 1 |
| 5  | 0.264359 | C | 1 |
| 5  | 0.420669 | C | 1 |
| 5  | 0.335395 | C | 1 |
| 9  | 0.216754 | C | 1 |
| 9  | 0.216754 | C | 1 |
| 16 | 0.146613 | C | 1 |
| 19 | 0.54659  | C | 1 |
| 18 | 0.892738 | E | 1 |
| 16 | 0.417369 | C | 1 |
| 18 | 0.892738 | E | 1 |
| 23 | 0.374951 | D | 1 |
| 5  | 0.264359 | C | 1 |
| 19 | 0.54659  | C | 1 |
| 6  | 0.175585 | C | 1 |
| 19 | 0.54659  | C | 1 |
| 6  | 0.175585 | C | 1 |
| 21 | 0.549664 | C | 1 |
| 12 | 0.429502 | F | 0 |
| 19 | 0.54659  | C | 1 |
| 19 | 0.54659  | C | 1 |
| 6  | 0.175585 | C | 1 |
| 19 | 0.676414 | E | 1 |
| 15 | 0.673274 | C | 1 |
| 19 | 0.54659  | C | 1 |
| 16 | 0.417369 | C | 1 |
| 21 | 0.549664 | C | 1 |
| 20 | 0.286639 | R | 0 |
| 16 | 0.146613 | C | 1 |

|    |          |   |   |
|----|----------|---|---|
| 19 | 0.676414 | E | 1 |
| 21 | 0.549664 | C | 1 |
| 19 | 0.676414 | E | 1 |
| 19 | 0.54659  | C | 1 |
| 15 | 0.673274 | C | 1 |
| 6  | 0.689883 | F | 0 |
| 20 | 0.301956 | C | 1 |
| 19 | 0.676414 | E | 1 |
| 21 | 0.549664 | C | 1 |
| 15 | 0.673274 | C | 1 |
| 19 | 0.676414 | E | 1 |
| 18 | 0.892738 | E | 1 |
| 4  | 0.497851 | C | 1 |
| 20 | 0.301956 | C | 1 |
| 21 | 0.549664 | C | 1 |
| 19 | 0.54659  | C | 1 |
| 7  | 0.395116 | C | 1 |
| 16 | 0.417369 | C | 1 |
| 14 | 0.292886 | C | 1 |
| 19 | 0.54659  | C | 1 |
| 20 | 0.301956 | C | 1 |
| 18 | 0.892738 | E | 1 |
| 18 | 0.718388 | C | 1 |
| 18 | 0.718388 | C | 1 |
| 18 | 0.892738 | E | 1 |
| 16 | 0.417369 | C | 1 |
| 5  | 0.420669 | C | 1 |
| 16 | 0.146613 | C | 1 |
| 7  | 0.395116 | C | 1 |
| 6  | 0.689883 | F | 0 |
| 19 | 0.54659  | C | 1 |
| 18 | 0.310028 | R | 0 |
| 18 | 0.892738 | E | 1 |
| 14 | 0.292886 | C | 1 |
| 21 | 0.549664 | C | 1 |
| 5  | 0.250858 | F | 0 |
| 18 | 0.718388 | C | 1 |
| 16 | 0.146613 | C | 1 |
| 19 | 0.54659  | C | 1 |
| 6  | 0.689883 | F | 0 |
| 7  | 0.395116 | C | 1 |
| 16 | 0.417369 | C | 1 |
| 7  | 0.078578 | C | 1 |
| 15 | 0.673274 | C | 1 |
| 12 | 0.429502 | F | 0 |
| 16 | 0.146613 | C | 1 |
| 16 | 0.417369 | C | 1 |
| 20 | 0.301956 | C | 1 |
| 19 | 0.676414 | E | 1 |
| 14 | 0.292886 | C | 1 |
| 7  | 0.078578 | C | 1 |
| 9  | 0.216754 | C | 1 |
| 4  | 0.497851 | C | 1 |
| 20 | 0.301956 | C | 1 |

|    |          |   |   |
|----|----------|---|---|
| 15 | 0.673274 | C | 1 |
| 18 | 0.892738 | E | 1 |
| 17 | 0.68962  | D | 1 |
| 5  | 0.420669 | C | 1 |
| 5  | 0.420669 | C | 1 |
| 5  | 0.264359 | C | 1 |
| 5  | 0.420669 | C | 1 |
| 6  | 0.689883 | F | 0 |
| 15 | 0.673274 | C | 1 |
| 6  | 0.199447 | C | 1 |
| 15 | 0.673274 | C | 1 |
| 20 | 0.301956 | C | 1 |
| 15 | 0.673274 | C | 1 |
| 20 | 0.286639 | R | 0 |
| 20 | 0.301956 | C | 1 |
| 5  | 0.264359 | C | 1 |
| 9  | 0.216754 | C | 1 |
| 18 | 0.718388 | C | 1 |
| 5  | 0.264359 | C | 1 |
| 4  | 0.497851 | C | 1 |
| 21 | 0.549664 | C | 1 |
| 5  | 0.264359 | C | 1 |
| 6  | 0.689883 | F | 0 |
| 12 | 0.192202 | F | 0 |
| 19 | 0.54659  | C | 1 |
| 19 | 0.676414 | E | 1 |
| 4  | 0.497851 | C | 1 |
| 12 | 0.192202 | F | 0 |
| 20 | 0.301956 | C | 1 |
| 19 | 0.676414 | E | 1 |
| 19 | 0.54659  | C | 1 |
| 19 | 0.54659  | C | 1 |
| 16 | 0.417369 | C | 1 |
| 5  | 0.264359 | C | 1 |
| 20 | 0.301956 | C | 1 |
| 15 | 0.673274 | C | 1 |
| 6  | 0.404958 | K | 1 |
| 20 | 0.286639 | R | 0 |
| 4  | 0.497851 | C | 1 |
| 12 | 0.429502 | F | 0 |
| 5  | 0.420669 | C | 1 |
| 6  | 0.689883 | F | 0 |
| 20 | 0.301956 | C | 1 |
| 6  | 0.404958 | K | 1 |
| 19 | 0.54659  | C | 1 |
| 5  | 0.250858 | F | 0 |
| 5  | 0.420669 | C | 1 |
| 5  | 0.420669 | C | 1 |
| 19 | 0.676414 | E | 1 |
| 21 | 0.549664 | C | 1 |
| 6  | 0.689883 | F | 0 |
| 12 | 0.192202 | F | 0 |
| 7  | 0.078578 | C | 1 |
| 6  | 0.199447 | C | 1 |



|    |          |   |   |
|----|----------|---|---|
| 18 | 0.892738 | E | 1 |
| 17 | 0.68962  | D | 1 |
| 6  | 0.689883 | F | 0 |
| 19 | 0.676414 | E | 1 |
| 18 | 0.310028 | R | 0 |
| 19 | 0.54659  | C | 1 |
| 6  | 0.199447 | C | 1 |
| 6  | 0.689883 | F | 0 |
| 6  | 0.689883 | F | 0 |
| 21 | 0.549664 | C | 1 |
| 6  | 0.175585 | C | 1 |
| 20 | 0.301956 | C | 1 |
| 20 | 0.301956 | C | 1 |
| 20 | 0.301956 | C | 1 |
| 6  | 0.404958 | K | 1 |
| 19 | 0.676414 | E | 1 |
| 6  | 0.175585 | C | 1 |
| 15 | 0.673274 | C | 1 |
| 6  | 0.404958 | K | 1 |
| 6  | 0.689883 | F | 0 |
| 15 | 0.673274 | C | 1 |
| 12 | 0.429502 | F | 0 |
| 21 | 0.549664 | C | 1 |
| 19 | 0.676414 | E | 1 |
| 14 | 0.292886 | C | 1 |
| 12 | 0.192202 | F | 0 |
| 16 | 0.417369 | C | 1 |
| 20 | 0.301956 | C | 1 |
| 19 | 0.54659  | C | 1 |
| 5  | 0.250858 | F | 0 |
| 17 | 0.68962  | D | 1 |
| 7  | 0.078578 | C | 1 |
| 5  | 0.250858 | F | 0 |
| 17 | 0.68962  | D | 1 |
| 6  | 0.689883 | F | 0 |
| 19 | 0.54659  | C | 1 |
| 21 | 0.549664 | C | 1 |
| 9  | 0.216754 | C | 1 |
| 20 | 0.301956 | C | 1 |
| 20 | 0.301956 | C | 1 |
| 19 | 0.54659  | C | 1 |
| 7  | 0.395116 | C | 1 |
| 16 | 0.146613 | C | 1 |
| 6  | 0.689883 | F | 0 |
| 16 | 0.417369 | C | 1 |
| 19 | 0.676414 | E | 1 |
| 18 | 0.718388 | C | 1 |
| 4  | 0.497851 | C | 1 |
| 7  | 0.078578 | C | 1 |
| 9  | 0.216754 | C | 1 |
| 18 | 0.718388 | C | 1 |
| 4  | 0.497851 | C | 1 |
| 6  | 0.689883 | F | 0 |
| 12 | 0.192202 | F | 0 |



|    |          |   |   |
|----|----------|---|---|
| 7  | 0.415478 | C | 1 |
| 16 | 0.65133  | Q | 0 |
| 6  | 0.399675 | C | 1 |
| 6  | 0.529919 | I | 0 |
| 8  | 0.382184 | C | 1 |
| 7  | 0.415478 | C | 1 |
| 8  | 0.382184 | C | 1 |
| 1  | 0.068284 | C | 1 |
| 6  | 0.529919 | I | 0 |
| 12 | 0.535645 | C | 1 |
| 5  | 0.338537 | C | 1 |
| 7  | 0.415478 | C | 1 |
| 12 | 0.535645 | C | 1 |
| 16 | 0.65133  | Q | 0 |
| 6  | 0.123189 | R | 0 |
| 6  | 0.399675 | C | 1 |
| 6  | 0.310655 | C | 1 |
| 5  | 0.338537 | C | 1 |
| 6  | 0.123189 | R | 0 |
| 5  | 0.236896 | C | 1 |
| 5  | 0.236896 | C | 1 |
| 12 | 0.535645 | C | 1 |
| 6  | 0.310655 | C | 1 |
| 19 | 0.292314 | C | 1 |
| 6  | 0.317496 | C | 1 |
| 19 | 0.292314 | C | 1 |
| 1  | 0.068284 | C | 1 |
| 6  | 0.317496 | C | 1 |
| 4  | 0.371171 | C | 1 |
| 6  | 0.399675 | C | 1 |
| 4  | 0.371171 | C | 1 |
| 4  | 0.371171 | C | 1 |
| 6  | 0.310655 | C | 1 |
| 5  | 0.068284 | C | 1 |
| 7  | 0.415478 | C | 1 |
| 22 | 0.403374 | C | 1 |
| 6  | 0.529919 | I | 0 |
| 19 | 0.292314 | C | 1 |
| 7  | 0.415478 | C | 1 |
| 5  | 0.236896 | C | 1 |
| 16 | 0.65133  | Q | 0 |
| 4  | 0.371171 | C | 1 |
| 6  | 0.123189 | R | 0 |
| 1  | 0.068284 | C | 1 |
| 4  | 0.371171 | C | 1 |
| 19 | 0.292314 | C | 1 |
| 6  | 0.399675 | C | 1 |
| 6  | 0.123189 | R | 0 |
| 4  | 0.371171 | C | 1 |
| 7  | 0.415478 | C | 1 |
| 4  | 0.371171 | C | 1 |
| 12 | 0.535645 | C | 1 |
| 22 | 0.403374 | C | 1 |
| 5  | 0.068284 | C | 1 |

|    |          |   |   |
|----|----------|---|---|
| 19 | 0.292314 | C | 1 |
| 6  | 0.399675 | C | 1 |
| 6  | 0.239696 | F | 0 |
| 12 | 0.535645 | C | 1 |
| 5  | 0.068284 | C | 1 |
| 4  | 0.371171 | C | 1 |
| 5  | 0.236896 | C | 1 |
| 1  | 0.204325 | C | 1 |
| 1  | 0.068284 | C | 1 |
| 6  | 0.310655 | C | 1 |
| 1  | 0.204325 | C | 1 |
| 6  | 0.399675 | C | 1 |
| 5  | 0.236896 | C | 1 |
| 8  | 0.382184 | C | 1 |
| 8  | 0.382184 | C | 1 |
| 1  | 0.204325 | C | 1 |
| 12 | 0.535645 | C | 1 |
| 6  | 0.404389 | C | 1 |
| 7  | 0.415478 | C | 1 |
| 6  | 0.123189 | R | 0 |
| 6  | 0.404389 | C | 1 |
| 4  | 0.371171 | C | 1 |
| 6  | 0.529919 | I | 0 |
| 5  | 0.338537 | C | 1 |
| 7  | 0.415478 | C | 1 |
| 6  | 0.529919 | I | 0 |
| 8  | 0.382184 | C | 1 |
| 6  | 0.529919 | I | 0 |
| 7  | 0.415478 | C | 1 |
| 8  | 0.382184 | C | 1 |
| 6  | 0.310655 | C | 1 |
| 1  | 0.204325 | C | 1 |
| 12 | 0.535645 | C | 1 |
| 6  | 0.529919 | I | 0 |
| 5  | 0.236896 | C | 1 |
| 8  | 0.382184 | C | 1 |
| 1  | 0.204325 | C | 1 |
| 6  | 0.123189 | R | 0 |
| 6  | 0.239696 | F | 0 |
| 22 | 0.403374 | C | 1 |
| 6  | 0.310655 | C | 1 |
| 12 | 0.535645 | C | 1 |
| 16 | 0.65133  | Q | 0 |
| 8  | 0.382184 | C | 1 |
| 1  | 0.068284 | C | 1 |
| 6  | 0.239696 | F | 0 |
| 5  | 0.236896 | C | 1 |
| 16 | 0.65133  | Q | 0 |
| 19 | 0.292314 | C | 1 |
| 1  | 0.068284 | C | 1 |
| 6  | 0.529919 | I | 0 |
| 19 | 0.292314 | C | 1 |
| 19 | 0.292314 | C | 1 |
| 19 | 0.292314 | C | 1 |

|    |          |   |   |
|----|----------|---|---|
| 12 | 0.535645 | C | 1 |
| 6  | 0.399675 | C | 1 |
| 6  | 0.317496 | C | 1 |
| 1  | 0.204325 | C | 1 |
| 6  | 0.317496 | C | 1 |
| 5  | 0.236896 | C | 1 |
| 4  | 0.371171 | C | 1 |
| 1  | 0.068284 | C | 1 |
| 5  | 0.338537 | C | 1 |
| 7  | 0.415478 | C | 1 |
| 6  | 0.317496 | C | 1 |
| 12 | 0.535645 | C | 1 |
| 8  | 0.382184 | C | 1 |
| 6  | 0.529919 | I | 0 |
| 7  | 0.415478 | C | 1 |
| 7  | 0.415478 | C | 1 |
| 4  | 0.371171 | C | 1 |
| 1  | 0.068284 | C | 1 |
| 7  | 0.415478 | C | 1 |
| 6  | 0.404389 | C | 1 |
| 19 | 0.292314 | C | 1 |
| 6  | 0.399675 | C | 1 |
| 4  | 0.371171 | C | 1 |
| 5  | 0.338537 | C | 1 |
| 5  | 0.236896 | C | 1 |
| 19 | 0.292314 | C | 1 |
| 19 | 0.292314 | C | 1 |
| 6  | 0.239696 | F | 0 |
| 5  | 0.577755 | C | 1 |
| 4  | 0.405144 | C | 1 |
| 5  | 0.577755 | C | 1 |
| 5  | 0.577755 | C | 1 |
| 5  | 0.577755 | C | 1 |
| 2  | 0.0978   | C | 1 |
| 5  | 0.577755 | C | 1 |
| 4  | 0.405144 | C | 1 |
| 19 | 0.524044 | C | 1 |
| 2  | 0.0978   | C | 1 |
| 2  | 0.331969 | C | 1 |
| 2  | 0.0978   | C | 1 |
| 4  | 0.405144 | C | 1 |
| 16 | 0.207553 | C | 1 |
| 4  | 0.405144 | C | 1 |
| 2  | 0.331969 | C | 1 |
| 16 | 0.207553 | C | 1 |
| 5  | 0.577755 | C | 1 |
| 5  | 0.577755 | C | 1 |
| 2  | 0.0978   | C | 1 |
| 2  | 0.331969 | C | 1 |
| 19 | 0.524044 | C | 1 |
| 19 | 0.524044 | C | 1 |
| 5  | 0.577755 | C | 1 |
| 5  | 0.577755 | C | 1 |
| 4  | 0.405144 | C | 1 |

|    |          |   |   |
|----|----------|---|---|
| 19 | 0.524044 | C | 1 |
| 2  | 0.0978   | C | 1 |
| 5  | 0.577755 | C | 1 |
| 19 | 0.524044 | C | 1 |
| 2  | 0.331969 | C | 1 |
| 4  | 0.405144 | C | 1 |
| 2  | 0.0978   | C | 1 |
| 5  | 0.577755 | C | 1 |
| 2  | 0.0978   | C | 1 |
| 4  | 0.405144 | C | 1 |
| 2  | 0.38849  | C | 1 |
| 5  | 0.577755 | C | 1 |
| 2  | 0.0978   | C | 1 |
| 5  | 0.577755 | C | 1 |
| 22 | 0.170435 | C | 1 |
| 2  | 0.331969 | C | 1 |
| 22 | 0.170435 | C | 1 |
| 19 | 0.524044 | C | 1 |
| 5  | 0.577755 | C | 1 |
| 5  | 0.577755 | C | 1 |
| 2  | 0.38849  | C | 1 |
| 2  | 0.331969 | C | 1 |
| 5  | 0.577755 | C | 1 |
| 22 | 0.170435 | C | 1 |
| 16 | 0.207553 | C | 1 |
| 4  | 0.405144 | C | 1 |
| 5  | 0.577755 | C | 1 |
| 5  | 0.577755 | C | 1 |
| 16 | 0.207553 | C | 1 |
| 22 | 0.170435 | C | 1 |
| 4  | 0.405144 | C | 1 |
| 2  | 0.38849  | C | 1 |
| 5  | 0.577755 | C | 1 |
| 20 | 0.314513 | I | 0 |
| 4  | 0.186777 | I | 0 |
| 8  | 0.224911 | C | 1 |
| 19 | 0.602551 | C | 1 |
| 8  | 0.224911 | C | 1 |
| 7  | 0.204001 | C | 1 |
| 20 | 0.751378 | C | 1 |
| 19 | 0.602551 | C | 1 |
| 17 | 0.613164 | D | 1 |
| 24 | 0.923242 | C | 1 |
| 2  | 0.357544 | C | 1 |
| 7  | 0.204001 | C | 1 |
| 4  | 0.444733 | C | 1 |
| 20 | 0.751378 | C | 1 |
| 20 | 0.751378 | C | 1 |
| 2  | 0.562413 | C | 1 |
| 17 | 0.613164 | D | 1 |
| 24 | 0.923242 | C | 1 |
| 7  | 0.204001 | C | 1 |
| 20 | 0.314513 | I | 0 |
| 7  | 0.204001 | C | 1 |

|    |          |   |   |
|----|----------|---|---|
| 24 | 0.923242 | C | 1 |
| 7  | 0.204001 | C | 1 |
| 4  | 0.444733 | C | 1 |
| 4  | 0.428301 | C | 1 |
| 2  | 0.562413 | C | 1 |
| 7  | 0.204001 | C | 1 |
| 2  | 0.562413 | C | 1 |
| 20 | 0.751378 | C | 1 |
| 2  | 0.562413 | C | 1 |
| 4  | 0.428301 | C | 1 |
| 2  | 0.357544 | C | 1 |
| 2  | 0.357544 | C | 1 |
| 24 | 0.923242 | C | 1 |
| 4  | 0.428301 | C | 1 |
| 4  | 0.186777 | I | 0 |
| 2  | 0.357544 | C | 1 |
| 20 | 0.314513 | I | 0 |
| 20 | 0.314513 | I | 0 |
| 20 | 0.751378 | C | 1 |
| 20 | 0.314513 | I | 0 |
| 24 | 0.923242 | C | 1 |
| 2  | 0.357544 | C | 1 |
| 4  | 0.186777 | I | 0 |
| 20 | 0.751378 | C | 1 |
| 2  | 0.357544 | C | 1 |
| 4  | 0.186777 | I | 0 |
| 2  | 0.357544 | C | 1 |
| 20 | 0.751378 | C | 1 |
| 20 | 0.923242 | C | 1 |
| 20 | 0.314513 | I | 0 |
| 17 | 0.613164 | D | 1 |
| 24 | 0.923242 | C | 1 |
| 20 | 0.314513 | I | 0 |
| 7  | 0.204001 | C | 1 |
| 2  | 0.562413 | C | 1 |
| 20 | 0.923242 | C | 1 |
| 7  | 0.204001 | C | 1 |
| 20 | 0.314513 | I | 0 |
| 20 | 0.751378 | C | 1 |
| 7  | 0.204001 | C | 1 |
| 20 | 0.923242 | C | 1 |
| 24 | 0.923242 | C | 1 |
| 19 | 0.602551 | C | 1 |
| 20 | 0.380408 | R | 0 |
| 20 | 0.314513 | I | 0 |
| 7  | 0.204001 | C | 1 |
| 4  | 0.428301 | C | 1 |
| 24 | 0.923242 | C | 1 |
| 20 | 0.923242 | C | 1 |
| 20 | 0.923242 | C | 1 |
| 7  | 0.204001 | C | 1 |
| 20 | 0.923242 | C | 1 |
| 20 | 0.923242 | C | 1 |
| 2  | 0.357544 | C | 1 |

|    |          |   |   |
|----|----------|---|---|
| 17 | 0.613164 | D | 1 |
| 20 | 0.923242 | C | 1 |
| 2  | 0.357544 | C | 1 |
| 2  | 0.357544 | C | 1 |
| 2  | 0.357544 | C | 1 |
| 20 | 0.380408 | R | 0 |
| 2  | 0.357544 | C | 1 |
| 4  | 0.444733 | C | 1 |
| 19 | 0.602551 | C | 1 |
| 20 | 0.380408 | R | 0 |
| 2  | 0.357544 | C | 1 |
| 4  | 0.428301 | C | 1 |
| 8  | 0.224911 | C | 1 |
| 2  | 0.562413 | C | 1 |
| 4  | 0.428301 | C | 1 |
| 4  | 0.428301 | C | 1 |
| 20 | 0.751378 | C | 1 |
| 24 | 0.923242 | C | 1 |
| 19 | 0.602551 | C | 1 |
| 4  | 0.186777 | I | 0 |
| 19 | 0.602551 | C | 1 |
| 6  | 0.208337 | C | 1 |
| 6  | 0.068284 | C | 1 |
| 9  | 0.23657  | C | 1 |
| 9  | 0.23657  | C | 1 |
| 6  | 0.068284 | C | 1 |
| 9  | 0.23657  | C | 1 |
| 16 | 0.561154 | C | 1 |
| 9  | 0.23657  | C | 1 |
| 6  | 0.068284 | C | 1 |
| 6  | 0.208337 | C | 1 |
| 16 | 0.561154 | C | 1 |
| 9  | 0.23657  | C | 1 |
| 16 | 0.561154 | C | 1 |
| 9  | 0.23657  | C | 1 |
| 16 | 0.561154 | C | 1 |
| 9  | 0.23657  | C | 1 |
| 6  | 0.208337 | C | 1 |
| 6  | 0.208337 | C | 1 |
| 16 | 0.561154 | C | 1 |
| 5  | 0.30038  | C | 1 |
| 13 | 0.071136 | C | 1 |
| 5  | 0.30038  | C | 1 |
| 2  | 0.311262 | I | 0 |
| 10 | 0.355812 | C | 1 |
| 5  | 0.191848 | C | 1 |
| 10 | 0.227111 | C | 1 |
| 6  | 0.392277 | C | 1 |
| 4  | 0.124678 | C | 1 |
| 5  | 0.30038  | C | 1 |
| 13 | 0.071136 | C | 1 |
| 5  | 0.30038  | C | 1 |
| 1  | 0.196429 | C | 1 |
| 2  | 0.606162 | C | 1 |



|    |          |   |   |
|----|----------|---|---|
| 5  | 0.30038  | C | 1 |
| 2  | 0.606162 | C | 1 |
| 5  | 0.141215 | C | 1 |
| 4  | 0.124678 | C | 1 |
| 6  | 0.392277 | C | 1 |
| 6  | 0.392277 | C | 1 |
| 4  | 0.124678 | C | 1 |
| 2  | 0.311262 | I | 0 |
| 10 | 0.355812 | C | 1 |
| 10 | 0.227111 | C | 1 |
| 9  | 0.421656 | I | 0 |
| 10 | 0.227111 | C | 1 |
| 2  | 0.311262 | I | 0 |
| 12 | 0.31752  | C | 1 |
| 10 | 0.355812 | C | 1 |
| 1  | 0.196429 | C | 1 |
| 2  | 0.311262 | I | 0 |
| 9  | 0.421656 | I | 0 |
| 1  | 0.196429 | C | 1 |
| 12 | 0.31752  | C | 1 |
| 13 | 0.071136 | C | 1 |
| 6  | 0.392277 | C | 1 |
| 5  | 0.191848 | C | 1 |
| 10 | 0.355812 | C | 1 |
| 6  | 0.392277 | C | 1 |
| 5  | 0.141215 | C | 1 |
| 1  | 0.196429 | C | 1 |
| 5  | 0.30038  | C | 1 |
| 5  | 0.30038  | C | 1 |
| 5  | 0.191848 | C | 1 |
| 10 | 0.227111 | C | 1 |
| 12 | 0.336339 | C | 1 |
| 10 | 0.227111 | C | 1 |
| 6  | 0.392277 | C | 1 |
| 2  | 0.606162 | C | 1 |
| 6  | 0.392277 | C | 1 |
| 2  | 0.311262 | I | 0 |
| 5  | 0.30038  | C | 1 |
| 10 | 0.355812 | C | 1 |
| 9  | 0.421656 | I | 0 |
| 12 | 0.336339 | C | 1 |
| 6  | 0.392277 | C | 1 |
| 6  | 0.392277 | C | 1 |
| 10 | 0.227111 | C | 1 |
| 5  | 0.141215 | C | 1 |
| 9  | 0.421656 | I | 0 |
| 9  | 0.421656 | I | 0 |
| 2  | 0.311262 | I | 0 |
| 6  | 0.392277 | C | 1 |
| 12 | 0.336339 | C | 1 |
| 4  | 0.124678 | C | 1 |
| 6  | 0.392277 | C | 1 |
| 2  | 0.311262 | I | 0 |
| 5  | 0.30038  | C | 1 |

|    |          |   |   |
|----|----------|---|---|
| 13 | 0.071136 | C | 1 |
| 4  | 0.124678 | C | 1 |
| 4  | 0.124678 | C | 1 |
| 1  | 0.196429 | C | 1 |
| 9  | 0.421656 | I | 0 |
| 12 | 0.31752  | C | 1 |
| 13 | 0.071136 | C | 1 |
| 20 | 0.338405 | I | 0 |
| 20 | 0.338405 | I | 0 |
| 20 | 0.338405 | I | 0 |
| 6  | 0.068284 | C | 1 |
| 6  | 0.068284 | C | 1 |
| 20 | 0.338405 | I | 0 |
| 6  | 0.068284 | C | 1 |
| 20 | 0.338405 | I | 0 |
| 20 | 0.338405 | I | 0 |
| 6  | 0.068284 | C | 1 |
| 20 | 0.338405 | I | 0 |
| 6  | 0.068284 | C | 1 |
| 6  | 0.068284 | C | 1 |
| 6  | 0.068284 | C | 1 |
| 22 | 0.176469 | C | 1 |
| 22 | 0.176469 | C | 1 |
| 5  | 0.288954 | C | 1 |
| 22 | 0.176469 | C | 1 |
| 6  | 0.199425 | C | 1 |
| 5  | 0.288954 | C | 1 |
| 19 | 0.197143 | C | 1 |
| 22 | 0.176469 | C | 1 |
| 19 | 0.197143 | C | 1 |
| 5  | 0.288954 | C | 1 |
| 5  | 0.288954 | C | 1 |
| 22 | 0.176469 | C | 1 |
| 19 | 0.197143 | C | 1 |
| 22 | 0.176469 | C | 1 |
| 6  | 0.199425 | C | 1 |
| 6  | 0.199425 | C | 1 |
| 5  | 0.288954 | C | 1 |
| 6  | 0.199425 | C | 1 |
| 19 | 0.197143 | C | 1 |
| 22 | 0.176469 | C | 1 |
| 6  | 0.199425 | C | 1 |
| 6  | 0.199425 | C | 1 |
| 6  | 0.199425 | C | 1 |
| 19 | 0.197143 | C | 1 |
| 22 | 0.176469 | C | 1 |
| 8  | 0.350099 | C | 1 |
| 8  | 0.350099 | C | 1 |
| 8  | 0.350099 | C | 1 |
| 22 | 0.186441 | C | 1 |
| 22 | 0.186441 | C | 1 |
| 22 | 0.186441 | C | 1 |
| 8  | 0.350099 | C | 1 |
| 8  | 0.350099 | C | 1 |

|    |          |   |   |
|----|----------|---|---|
| 22 | 0.186441 | C | 1 |
| 8  | 0.350099 | C | 1 |
| 22 | 0.186441 | C | 1 |
| 9  | 0.458    | C | 1 |
| 5  | 0.329748 | C | 1 |
| 5  | 0.173227 | C | 1 |
| 9  | 0.458    | C | 1 |
| 4  | 0.634999 | C | 1 |
| 4  | 0.58339  | C | 1 |
| 4  | 0.58339  | C | 1 |
| 5  | 0.257089 | C | 1 |
| 5  | 0.173227 | C | 1 |
| 4  | 0.58339  | C | 1 |
| 1  | 0.147341 | C | 1 |
| 4  | 0.634999 | C | 1 |
| 5  | 0.257089 | C | 1 |
| 4  | 0.58339  | C | 1 |
| 5  | 0.257089 | C | 1 |
| 4  | 0.634999 | C | 1 |
| 5  | 0.257089 | C | 1 |
| 4  | 0.610458 | B | 1 |
| 21 | 0.614369 | C | 1 |
| 1  | 0.147341 | C | 1 |
| 4  | 0.634999 | C | 1 |
| 5  | 0.173227 | C | 1 |
| 1  | 0.147341 | C | 1 |
| 9  | 0.458    | C | 1 |
| 1  | 0.147341 | C | 1 |
| 4  | 0.58339  | C | 1 |
| 1  | 0.147341 | C | 1 |
| 5  | 0.173227 | C | 1 |
| 5  | 0.173227 | C | 1 |
| 11 | 0.414484 | C | 1 |
| 4  | 0.634999 | C | 1 |
| 9  | 0.458    | C | 1 |
| 11 | 0.414484 | C | 1 |
| 9  | 0.458    | C | 1 |
| 21 | 0.614369 | C | 1 |
| 4  | 0.610458 | B | 1 |
| 4  | 0.634999 | C | 1 |
| 5  | 0.257089 | C | 1 |
| 5  | 0.329748 | C | 1 |
| 4  | 0.58339  | C | 1 |
| 4  | 0.58339  | C | 1 |
| 4  | 0.610458 | B | 1 |
| 21 | 0.614369 | C | 1 |
| 4  | 0.610458 | B | 1 |
| 4  | 0.634999 | C | 1 |
| 5  | 0.173227 | C | 1 |
| 5  | 0.257089 | C | 1 |
| 5  | 0.173227 | C | 1 |
| 1  | 0.147341 | C | 1 |
| 4  | 0.634999 | C | 1 |
| 11 | 0.414484 | C | 1 |

|    |          |   |   |
|----|----------|---|---|
| 1  | 0.147341 | C | 1 |
| 21 | 0.614369 | C | 1 |
| 4  | 0.634999 | C | 1 |
| 5  | 0.257089 | C | 1 |
| 9  | 0.458    | C | 1 |
| 9  | 0.458    | C | 1 |
| 5  | 0.329748 | C | 1 |
| 4  | 0.634999 | C | 1 |
| 4  | 0.634999 | C | 1 |
| 1  | 0.147341 | C | 1 |
| 5  | 0.329748 | C | 1 |
| 5  | 0.329748 | C | 1 |
| 5  | 0.257089 | C | 1 |
| 9  | 0.458    | C | 1 |
| 4  | 0.610458 | B | 1 |
| 9  | 0.458    | C | 1 |
| 5  | 0.173227 | C | 1 |
| 4  | 0.610458 | B | 1 |
| 4  | 0.610458 | B | 1 |
| 5  | 0.173227 | C | 1 |
| 9  | 0.458    | C | 1 |
| 4  | 0.58339  | C | 1 |
| 9  | 0.458    | C | 1 |
| 5  | 0.257089 | C | 1 |
| 9  | 0.458    | C | 1 |
| 11 | 0.414484 | C | 1 |
| 4  | 0.634999 | C | 1 |
| 4  | 0.58339  | C | 1 |
| 1  | 0.147341 | C | 1 |
| 11 | 0.414484 | C | 1 |
| 9  | 0.458    | C | 1 |
| 4  | 0.610458 | B | 1 |
| 5  | 0.173227 | C | 1 |
| 9  | 0.458    | C | 1 |
| 21 | 0.614369 | C | 1 |
| 16 | 0.564932 | C | 1 |
| 13 | 0.423609 | B | 1 |
| 8  | 0.174362 | C | 1 |
| 5  | 0.270509 | C | 1 |
| 8  | 0.371685 | C | 1 |
| 12 | 0.584135 | C | 1 |
| 12 | 0.584135 | C | 1 |
| 5  | 0.270509 | C | 1 |
| 1  | 0.200288 | C | 1 |
| 6  | 0.434432 | C | 1 |
| 8  | 0.174362 | C | 1 |
| 9  | 0.279218 | C | 1 |
| 6  | 0.434432 | C | 1 |
| 8  | 0.371685 | C | 1 |
| 6  | 0.434432 | C | 1 |
| 1  | 0.200288 | C | 1 |
| 8  | 0.174362 | C | 1 |
| 1  | 0.12503  | C | 1 |
| 1  | 0.12503  | C | 1 |

|    |          |   |   |
|----|----------|---|---|
| 14 | 0.4456   | G | 0 |
| 19 | 0.769289 | E | 1 |
| 13 | 0.423609 | B | 1 |
| 8  | 0.371685 | C | 1 |
| 6  | 0.434432 | C | 1 |
| 8  | 0.371685 | C | 1 |
| 9  | 0.279218 | C | 1 |
| 8  | 0.174362 | C | 1 |
| 13 | 0.423609 | B | 1 |
| 9  | 0.279218 | C | 1 |
| 13 | 0.423609 | B | 1 |
| 19 | 0.769289 | E | 1 |
| 9  | 0.279218 | C | 1 |
| 5  | 0.270509 | C | 1 |
| 8  | 0.371685 | C | 1 |
| 6  | 0.434432 | C | 1 |
| 9  | 0.279218 | C | 1 |
| 8  | 0.174362 | C | 1 |
| 13 | 0.423609 | B | 1 |
| 13 | 0.423609 | B | 1 |
| 6  | 0.434432 | C | 1 |
| 19 | 0.769289 | E | 1 |
| 12 | 0.584135 | C | 1 |
| 16 | 0.564932 | C | 1 |
| 14 | 0.4456   | G | 0 |
| 8  | 0.371685 | C | 1 |
| 9  | 0.279218 | C | 1 |
| 14 | 0.4456   | G | 0 |
| 14 | 0.4456   | G | 0 |
| 8  | 0.371685 | C | 1 |
| 12 | 0.584135 | C | 1 |
| 9  | 0.279218 | C | 1 |
| 1  | 0.200288 | C | 1 |
| 8  | 0.174362 | C | 1 |
| 9  | 0.279218 | C | 1 |
| 13 | 0.423609 | B | 1 |
| 8  | 0.174362 | C | 1 |
| 6  | 0.434432 | C | 1 |
| 8  | 0.371685 | C | 1 |
| 8  | 0.371685 | C | 1 |
| 1  | 0.200288 | C | 1 |
| 6  | 0.434432 | C | 1 |
| 19 | 0.769289 | E | 1 |
| 14 | 0.4456   | G | 0 |
| 8  | 0.371685 | C | 1 |
| 8  | 0.371685 | C | 1 |
| 16 | 0.564932 | C | 1 |
| 14 | 0.4456   | G | 0 |
| 12 | 0.584135 | C | 1 |
| 14 | 0.4456   | G | 0 |
| 13 | 0.423609 | B | 1 |
| 16 | 0.564932 | C | 1 |
| 9  | 0.279218 | C | 1 |
| 19 | 0.769289 | E | 1 |

|    |          |   |   |
|----|----------|---|---|
| 16 | 0.564932 | C | 1 |
| 1  | 0.200288 | C | 1 |
| 12 | 0.584135 | C | 1 |
| 12 | 0.584135 | C | 1 |
| 5  | 0.270509 | C | 1 |
| 9  | 0.279218 | C | 1 |
| 9  | 0.279218 | C | 1 |
| 6  | 0.434432 | C | 1 |
| 16 | 0.564932 | C | 1 |
| 16 | 0.564932 | C | 1 |
| 14 | 0.4456   | G | 0 |
| 16 | 0.564932 | C | 1 |
| 1  | 0.12503  | C | 1 |
| 9  | 0.279218 | C | 1 |
| 14 | 0.4456   | G | 0 |
| 16 | 0.564932 | C | 1 |
| 9  | 0.279218 | C | 1 |
| 5  | 0.270509 | C | 1 |
| 1  | 0.200288 | C | 1 |
| 12 | 0.584135 | C | 1 |
| 16 | 0.564932 | C | 1 |
| 13 | 0.423609 | B | 1 |
| 9  | 0.279218 | C | 1 |
| 9  | 0.279218 | C | 1 |
| 13 | 0.423609 | B | 1 |
| 10 | 0.587013 | C | 1 |
| 19 | 0.620766 | C | 1 |
| 9  | 0.438528 | C | 1 |
| 5  | 0.415966 | C | 1 |
| 19 | 0.525618 | C | 1 |
| 9  | 0.438528 | C | 1 |
| 19 | 0.525618 | C | 1 |
| 9  | 0.438528 | C | 1 |
| 5  | 0.415966 | C | 1 |
| 19 | 0.620766 | C | 1 |
| 10 | 0.587013 | C | 1 |
| 19 | 0.525618 | C | 1 |
| 10 | 0.587013 | C | 1 |
| 19 | 0.525618 | C | 1 |
| 19 | 0.525618 | C | 1 |
| 19 | 0.620766 | C | 1 |
| 9  | 0.438528 | C | 1 |
| 19 | 0.620766 | C | 1 |
| 10 | 0.587013 | C | 1 |
| 10 | 0.587013 | C | 1 |
| 9  | 0.438528 | C | 1 |
| 19 | 0.620766 | C | 1 |
| 19 | 0.620766 | C | 1 |
| 19 | 0.620766 | C | 1 |
| 10 | 0.587013 | C | 1 |
| 19 | 0.525618 | C | 1 |
| 10 | 0.587013 | C | 1 |
| 9  | 0.438528 | C | 1 |
| 9  | 0.438528 | C | 1 |

|    |          |   |   |
|----|----------|---|---|
| 5  | 0.415966 | C | 1 |
| 9  | 0.438528 | C | 1 |
| 10 | 0.587013 | C | 1 |
| 10 | 0.587013 | C | 1 |
| 19 | 0.525618 | C | 1 |
| 19 | 0.525618 | C | 1 |
| 1  | 0.210512 | C | 1 |
| 1  | 0.210512 | C | 1 |
| 1  | 0.210512 | C | 1 |
| 1  | 0.210512 | C | 1 |
| 1  | 0.210512 | C | 1 |
| 1  | 0.210512 | C | 1 |
| 1  | 0.210512 | C | 1 |
| 1  | 0.210512 | C | 1 |
| 20 | 0.314813 | S | 0 |
| 10 | 0.204654 | C | 1 |
| 20 | 0.314813 | S | 0 |
| 20 | 0.314813 | S | 0 |
| 20 | 0.314813 | S | 0 |
| 20 | 0.314813 | S | 0 |
| 20 | 0.314813 | S | 0 |
| 14 | 0.564083 | C | 1 |
| 20 | 0.314813 | S | 0 |
| 16 | 0.211971 | C | 1 |
| 20 | 0.314813 | S | 0 |
| 6  | 0.180833 | C | 1 |
| 14 | 0.564083 | C | 1 |
| 20 | 0.314813 | S | 0 |
| 6  | 0.168596 | M | 0 |
| 4  | 0.398107 | C | 1 |
| 5  | 0.333504 | C | 1 |
| 14 | 0.646548 | C | 1 |
| 6  | 0.193883 | C | 1 |
| 5  | 0.333504 | C | 1 |
| 14 | 0.646548 | C | 1 |
| 6  | 0.180833 | C | 1 |
| 5  | 0.333504 | C | 1 |
| 20 | 0.314813 | S | 0 |
| 20 | 0.314813 | S | 0 |
| 14 | 0.564083 | C | 1 |
| 6  | 0.168596 | M | 0 |
| 14 | 0.564083 | C | 1 |
| 14 | 0.646548 | C | 1 |
| 6  | 0.308421 | C | 1 |
| 5  | 0.333504 | C | 1 |
| 6  | 0.308421 | C | 1 |
| 14 | 0.646548 | C | 1 |
| 16 | 0.211971 | C | 1 |
| 14 | 0.646548 | C | 1 |
| 14 | 0.646548 | C | 1 |
| 14 | 0.646548 | C | 1 |
| 20 | 0.314813 | S | 0 |
| 6  | 0.308421 | C | 1 |
| 14 | 0.646548 | C | 1 |
| 6  | 0.168596 | M | 0 |
| 16 | 0.211971 | C | 1 |

|    |          |   |   |
|----|----------|---|---|
| 5  | 0.068284 | C | 1 |
| 4  | 0.398107 | C | 1 |
| 10 | 0.204654 | C | 1 |
| 6  | 0.168596 | M | 0 |
| 14 | 0.646548 | C | 1 |
| 14 | 0.646548 | C | 1 |
| 4  | 0.398107 | C | 1 |
| 14 | 0.646548 | C | 1 |
| 5  | 0.333504 | C | 1 |
| 14 | 0.646548 | C | 1 |
| 6  | 0.168596 | M | 0 |
| 6  | 0.180833 | C | 1 |
| 6  | 0.308421 | C | 1 |
| 20 | 0.314813 | S | 0 |
| 10 | 0.204654 | C | 1 |
| 20 | 0.314813 | S | 0 |
| 5  | 0.333504 | C | 1 |
| 14 | 0.646548 | C | 1 |
| 10 | 0.204654 | C | 1 |
| 6  | 0.180833 | C | 1 |
| 5  | 0.068284 | C | 1 |
| 5  | 0.068284 | C | 1 |
| 6  | 0.180833 | C | 1 |
| 6  | 0.180833 | C | 1 |
| 4  | 0.398107 | C | 1 |
| 5  | 0.333504 | C | 1 |
| 5  | 0.333504 | C | 1 |
| 5  | 0.068284 | C | 1 |
| 20 | 0.314813 | S | 0 |
| 20 | 0.314813 | S | 0 |
| 5  | 0.333504 | C | 1 |
| 14 | 0.564083 | C | 1 |
| 10 | 0.204654 | C | 1 |
| 14 | 0.564083 | C | 1 |
| 6  | 0.180833 | C | 1 |
| 14 | 0.220434 | C | 1 |
| 20 | 0.314813 | S | 0 |
| 5  | 0.068284 | C | 1 |
| 14 | 0.564083 | C | 1 |
| 4  | 0.398107 | C | 1 |
| 20 | 0.314813 | S | 0 |
| 6  | 0.193883 | C | 1 |
| 20 | 0.314813 | S | 0 |
| 14 | 0.646548 | C | 1 |
| 20 | 0.314813 | S | 0 |
| 14 | 0.564083 | C | 1 |
| 14 | 0.220434 | C | 1 |
| 20 | 0.314813 | S | 0 |
| 6  | 0.308421 | C | 1 |
| 10 | 0.204654 | C | 1 |
| 5  | 0.068284 | C | 1 |
| 5  | 0.333504 | C | 1 |
| 16 | 0.211971 | C | 1 |
| 6  | 0.180833 | C | 1 |



|    |          |   |   |
|----|----------|---|---|
| 6  | 0.193883 | C | 1 |
| 20 | 0.314813 | S | 0 |
| 14 | 0.646548 | C | 1 |
| 20 | 0.314813 | S | 0 |
| 14 | 0.646548 | C | 1 |
| 6  | 0.168596 | M | 0 |
| 6  | 0.168596 | M | 0 |
| 20 | 0.314813 | S | 0 |
| 20 | 0.314813 | S | 0 |
| 14 | 0.646548 | C | 1 |
| 14 | 0.220434 | C | 1 |
| 5  | 0.333504 | C | 1 |
| 6  | 0.193883 | C | 1 |
| 14 | 0.646548 | C | 1 |
| 6  | 0.308421 | C | 1 |
| 5  | 0.068284 | C | 1 |
| 6  | 0.180833 | C | 1 |
| 20 | 0.314813 | S | 0 |
| 10 | 0.204654 | C | 1 |
| 14 | 0.646548 | C | 1 |
| 16 | 0.211971 | C | 1 |
| 14 | 0.220434 | C | 1 |
| 14 | 0.646548 | C | 1 |
| 6  | 0.193883 | C | 1 |
| 20 | 0.314813 | S | 0 |
| 5  | 0.068284 | C | 1 |
| 14 | 0.646548 | C | 1 |
| 14 | 0.220434 | C | 1 |
| 14 | 0.646548 | C | 1 |
| 20 | 0.314813 | S | 0 |
| 1  | 0.214771 | C | 1 |
| 1  | 0.214771 | C | 1 |
| 1  | 0.214771 | C | 1 |
| 2  | 0.252115 | C | 1 |
| 1  | 0.561132 | C | 1 |
| 2  | 0.252115 | C | 1 |
| 2  | 0.252115 | C | 1 |
| 2  | 0.252115 | C | 1 |
| 1  | 0.561132 | C | 1 |
| 1  | 0.561132 | C | 1 |
| 1  | 0.561132 | C | 1 |
| 2  | 0.252115 | C | 1 |
| 1  | 0.561132 | C | 1 |
| 1  | 0.561132 | C | 1 |
| 1  | 0.561132 | C | 1 |
| 5  | 0.707056 | C | 1 |
| 9  | 0.340463 | C | 1 |
| 6  | 0.487858 | C | 1 |
| 22 | 0.685954 | C | 1 |
| 22 | 0.685954 | C | 1 |
| 15 | 0.419181 | C | 1 |
| 1  | 0.6422   | C | 1 |
| 22 | 0.685954 | C | 1 |
| 10 | 0.752087 | C | 1 |

|    |          |   |   |
|----|----------|---|---|
| 6  | 0.622371 | C | 1 |
| 19 | 0.390353 | C | 1 |
| 24 | 0.623791 | S | 0 |
| 4  | 0.284344 | C | 1 |
| 4  | 0.527949 | C | 1 |
| 9  | 0.771515 | C | 1 |
| 6  | 0.528441 | C | 1 |
| 19 | 0.711347 | C | 1 |
| 19 | 0.390353 | C | 1 |
| 6  | 0.375173 | C | 1 |
| 9  | 0.32204  | C | 1 |
| 6  | 0.246138 | C | 1 |
| 6  | 0.100288 | C | 1 |
| 6  | 0.375173 | C | 1 |
| 6  | 0.383992 | I | 0 |
| 6  | 0.487858 | C | 1 |
| 6  | 0.375173 | C | 1 |
| 15 | 0.419181 | C | 1 |
| 16 | 0.356441 | C | 1 |
| 19 | 0.390353 | C | 1 |
| 16 | 0.594942 | C | 1 |
| 9  | 0.336846 | C | 1 |
| 9  | 0.503462 | C | 1 |
| 6  | 0.20094  | C | 1 |
| 7  | 0.164378 | C | 1 |
| 6  | 0.487858 | C | 1 |
| 1  | 0.452568 | C | 1 |
| 22 | 0.547908 | C | 1 |
| 24 | 0.807546 | C | 1 |
| 6  | 0.487858 | C | 1 |
| 24 | 0.109292 | F | 0 |
| 22 | 0.547908 | C | 1 |
| 23 | 0.581754 | F | 0 |
| 6  | 0.20094  | C | 1 |
| 5  | 0.458569 | C | 1 |
| 5  | 0.296087 | C | 1 |
| 24 | 0.623791 | S | 0 |
| 9  | 0.279758 | C | 1 |
| 1  | 0.296023 | C | 1 |
| 6  | 0.116416 | I | 0 |
| 5  | 0.164701 | C | 1 |
| 2  | 0.301934 | C | 1 |
| 19 | 0.390353 | C | 1 |
| 12 | 0.464944 | C | 1 |
| 6  | 0.42114  | C | 1 |
| 6  | 0.375173 | C | 1 |
| 5  | 0.465051 | C | 1 |
| 7  | 0.212056 | M | 0 |
| 9  | 0.823031 | E | 1 |
| 6  | 0.333555 | I | 0 |
| 16 | 0.356441 | C | 1 |
| 21 | 0.365342 | C | 1 |
| 6  | 0.20094  | C | 1 |
| 8  | 0.266338 | I | 0 |

|    |          |   |   |
|----|----------|---|---|
| 1  | 0.162806 | C | 1 |
| 5  | 0.148224 | I | 0 |
| 9  | 0.823031 | E | 1 |
| 9  | 0.279758 | C | 1 |
| 5  | 0.238085 | C | 1 |
| 5  | 0.415422 | C | 1 |
| 23 | 0.20752  | F | 0 |
| 21 | 0.365342 | C | 1 |
| 6  | 0.528441 | C | 1 |
| 6  | 0.36006  | I | 0 |
| 22 | 0.685954 | C | 1 |
| 2  | 0.196197 | C | 1 |
| 5  | 0.442676 | C | 1 |
| 5  | 0.143519 | C | 1 |
| 9  | 0.199965 | C | 1 |
| 22 | 0.685954 | C | 1 |
| 9  | 0.505921 | C | 1 |
| 5  | 0.442676 | C | 1 |
| 19 | 0.390353 | C | 1 |
| 5  | 0.465051 | C | 1 |
| 6  | 0.246138 | C | 1 |
| 5  | 0.540682 | N | 0 |
| 7  | 0.164378 | C | 1 |
| 12 | 0.464944 | C | 1 |
| 6  | 0.246138 | C | 1 |
| 1  | 0.658169 | C | 1 |
| 19 | 0.515829 | C | 1 |
| 24 | 0.807546 | C | 1 |
| 6  | 0.656888 | C | 1 |
| 9  | 0.823031 | E | 1 |
| 4  | 0.357037 | C | 1 |
| 4  | 0.330314 | C | 1 |
| 6  | 0.42114  | C | 1 |
| 6  | 0.383111 | C | 1 |
| 6  | 0.528441 | C | 1 |
| 1  | 0.381617 | C | 1 |
| 6  | 0.602219 | E | 1 |
| 23 | 0.581754 | F | 0 |
| 6  | 0.383111 | C | 1 |
| 1  | 0.381617 | C | 1 |
| 4  | 0.314932 | C | 1 |
| 22 | 0.685954 | C | 1 |
| 16 | 0.356441 | C | 1 |
| 5  | 0.426089 | C | 1 |
| 8  | 0.15697  | C | 1 |
| 15 | 0.419181 | C | 1 |
| 16 | 0.356441 | C | 1 |
| 1  | 0.210181 | C | 1 |
| 5  | 0.191254 | C | 1 |
| 5  | 0.707056 | C | 1 |
| 22 | 0.685954 | C | 1 |
| 10 | 0.519453 | C | 1 |
| 9  | 0.141365 | I | 0 |
| 22 | 0.685954 | C | 1 |

|    |          |   |   |
|----|----------|---|---|
| 6  | 0.473441 | C | 1 |
| 7  | 0.670547 | C | 1 |
| 4  | 0.544033 | C | 1 |
| 6  | 0.17402  | C | 1 |
| 6  | 0.17402  | C | 1 |
| 12 | 0.464944 | C | 1 |
| 7  | 0.160251 | C | 1 |
| 5  | 0.114533 | C | 1 |
| 7  | 0.212056 | M | 0 |
| 4  | 0.314932 | C | 1 |
| 15 | 0.419181 | C | 1 |
| 22 | 0.685954 | C | 1 |
| 5  | 0.415422 | C | 1 |
| 10 | 0.752087 | C | 1 |
| 22 | 0.685954 | C | 1 |
| 5  | 0.298363 | I | 0 |
| 19 | 0.767378 | C | 1 |
| 6  | 0.383992 | I | 0 |
| 5  | 0.458569 | C | 1 |
| 20 | 0.660779 | C | 1 |
| 14 | 0.521816 | C | 1 |
| 20 | 0.660779 | C | 1 |
| 5  | 0.238085 | C | 1 |
| 7  | 0.212056 | M | 0 |
| 7  | 0.670547 | C | 1 |
| 5  | 0.42834  | C | 1 |
| 8  | 0.437158 | C | 1 |
| 6  | 0.368738 | C | 1 |
| 5  | 0.540682 | N | 0 |
| 9  | 0.771515 | C | 1 |
| 5  | 0.42834  | C | 1 |
| 5  | 0.42834  | C | 1 |
| 22 | 0.685954 | C | 1 |
| 6  | 0.461008 | F | 0 |
| 5  | 0.402436 | I | 0 |
| 19 | 0.515829 | C | 1 |
| 6  | 0.563653 | I | 0 |
| 5  | 0.114533 | C | 1 |
| 5  | 0.42834  | C | 1 |
| 6  | 0.375173 | C | 1 |
| 6  | 0.333555 | I | 0 |
| 6  | 0.291393 | C | 1 |
| 22 | 0.164936 | C | 1 |
| 7  | 0.212056 | M | 0 |
| 7  | 0.558888 | K | 1 |
| 8  | 0.15697  | C | 1 |
| 16 | 0.356441 | C | 1 |
| 9  | 0.232685 | C | 1 |
| 6  | 0.368738 | C | 1 |
| 11 | 0.661481 | E | 1 |
| 6  | 0.602219 | E | 1 |
| 6  | 0.622371 | C | 1 |
| 9  | 0.505921 | C | 1 |
| 6  | 0.100288 | C | 1 |

|    |          |   |   |
|----|----------|---|---|
| 9  | 0.141365 | I | 0 |
| 22 | 0.685954 | C | 1 |
| 2  | 0.134513 | C | 1 |
| 8  | 0.330931 | C | 1 |
| 8  | 0.446729 | C | 1 |
| 19 | 0.711347 | C | 1 |
| 22 | 0.685954 | C | 1 |
| 22 | 0.685954 | C | 1 |
| 6  | 0.622371 | C | 1 |
| 2  | 0.403488 | C | 1 |
| 4  | 0.288384 | I | 0 |
| 9  | 0.340463 | C | 1 |
| 9  | 0.279758 | C | 1 |
| 15 | 0.419181 | C | 1 |
| 1  | 0.689606 | K | 1 |
| 12 | 0.464944 | C | 1 |
| 22 | 0.685954 | C | 1 |
| 9  | 0.771515 | C | 1 |
| 14 | 0.521816 | C | 1 |
| 5  | 0.143519 | C | 1 |
| 1  | 0.689606 | K | 1 |
| 7  | 0.428155 | C | 1 |
| 9  | 0.199965 | C | 1 |
| 6  | 0.472131 | C | 1 |
| 6  | 0.338957 | C | 1 |
| 5  | 0.540682 | N | 0 |
| 23 | 0.406989 | F | 0 |
| 8  | 0.446729 | C | 1 |
| 16 | 0.356441 | C | 1 |
| 9  | 0.32204  | C | 1 |
| 6  | 0.20094  | C | 1 |
| 19 | 0.515829 | C | 1 |
| 9  | 0.141365 | I | 0 |
| 5  | 0.191254 | C | 1 |
| 22 | 0.685954 | C | 1 |
| 22 | 0.685954 | C | 1 |
| 23 | 0.592068 | D | 1 |
| 9  | 0.279758 | C | 1 |
| 11 | 0.661481 | E | 1 |
| 5  | 0.458569 | C | 1 |
| 2  | 0.249563 | C | 1 |
| 6  | 0.327384 | C | 1 |
| 14 | 0.521816 | C | 1 |
| 5  | 0.164701 | C | 1 |
| 6  | 0.292435 | C | 1 |
| 6  | 0.333555 | I | 0 |
| 19 | 0.767378 | C | 1 |
| 16 | 0.594942 | C | 1 |
| 5  | 0.707056 | C | 1 |
| 17 | 0.671569 | E | 1 |
| 2  | 0.196197 | C | 1 |
| 13 | 0.46225  | I | 0 |
| 5  | 0.279065 | L | 0 |
| 6  | 0.210507 | C | 1 |

|    |          |   |   |
|----|----------|---|---|
| 6  | 0.423144 | C | 1 |
| 24 | 0.525907 | C | 1 |
| 9  | 0.279758 | C | 1 |
| 6  | 0.20094  | C | 1 |
| 5  | 0.42834  | C | 1 |
| 21 | 0.708479 | C | 1 |
| 22 | 0.164936 | C | 1 |
| 5  | 0.298363 | I | 0 |
| 5  | 0.279065 | L | 0 |
| 6  | 0.375173 | C | 1 |
| 16 | 0.594942 | C | 1 |
| 24 | 0.807546 | C | 1 |
| 6  | 0.383111 | C | 1 |
| 23 | 0.581754 | F | 0 |
| 8  | 0.205041 | C | 1 |
| 24 | 0.623791 | S | 0 |
| 5  | 0.238085 | C | 1 |
| 9  | 0.340463 | C | 1 |
| 1  | 0.6422   | C | 1 |
| 6  | 0.622371 | C | 1 |
| 5  | 0.415422 | C | 1 |
| 7  | 0.212056 | M | 0 |
| 6  | 0.487858 | C | 1 |
| 7  | 0.212056 | M | 0 |
| 5  | 0.42834  | C | 1 |
| 14 | 0.521816 | C | 1 |
| 24 | 0.807546 | C | 1 |
| 6  | 0.602219 | E | 1 |
| 6  | 0.487858 | C | 1 |
| 2  | 0.196197 | C | 1 |
| 6  | 0.534231 | G | 0 |
| 4  | 0.527949 | C | 1 |
| 5  | 0.618053 | C | 1 |
| 6  | 0.602636 | F | 0 |
| 23 | 0.581754 | F | 0 |
| 9  | 0.232685 | C | 1 |
| 5  | 0.143519 | C | 1 |
| 1  | 0.381617 | C | 1 |
| 6  | 0.246138 | C | 1 |
| 13 | 0.46225  | I | 0 |
| 15 | 0.419181 | C | 1 |
| 9  | 0.618203 | C | 1 |
| 9  | 0.32204  | C | 1 |
| 6  | 0.472131 | C | 1 |
| 6  | 0.383111 | C | 1 |
| 6  | 0.622371 | C | 1 |
| 21 | 0.365342 | C | 1 |
| 6  | 0.246138 | C | 1 |
| 4  | 0.378781 | C | 1 |
| 6  | 0.292435 | C | 1 |
| 4  | 0.378781 | C | 1 |
| 4  | 0.378781 | C | 1 |
| 5  | 0.279065 | L | 0 |
| 6  | 0.246138 | C | 1 |

|    |          |   |   |
|----|----------|---|---|
| 24 | 0.807546 | C | 1 |
| 1  | 0.381617 | C | 1 |
| 5  | 0.301581 | C | 1 |
| 2  | 0.249563 | C | 1 |
| 4  | 0.527949 | C | 1 |
| 6  | 0.42114  | C | 1 |
| 7  | 0.164378 | C | 1 |
| 19 | 0.515829 | C | 1 |
| 12 | 0.464944 | C | 1 |
| 19 | 0.767378 | C | 1 |
| 2  | 0.301934 | C | 1 |
| 14 | 0.521816 | C | 1 |
| 7  | 0.164378 | C | 1 |
| 8  | 0.205041 | C | 1 |
| 23 | 0.592068 | D | 1 |
| 2  | 0.134513 | C | 1 |
| 5  | 0.442676 | C | 1 |
| 5  | 0.238085 | C | 1 |
| 4  | 0.496088 | C | 1 |
| 24 | 0.525907 | C | 1 |
| 20 | 0.660779 | C | 1 |
| 4  | 0.496088 | C | 1 |
| 22 | 0.685954 | C | 1 |
| 4  | 0.284344 | C | 1 |
| 6  | 0.473441 | C | 1 |
| 9  | 0.279758 | C | 1 |
| 6  | 0.42114  | C | 1 |
| 5  | 0.148224 | I | 0 |
| 23 | 0.406989 | F | 0 |
| 5  | 0.618053 | C | 1 |
| 14 | 0.521816 | C | 1 |
| 4  | 0.068284 | I | 0 |
| 1  | 0.296023 | C | 1 |
| 22 | 0.685954 | C | 1 |
| 1  | 0.210181 | C | 1 |
| 14 | 0.521816 | C | 1 |
| 7  | 0.160251 | C | 1 |
| 9  | 0.771515 | C | 1 |
| 1  | 0.452568 | C | 1 |
| 9  | 0.199965 | C | 1 |
| 21 | 0.708479 | C | 1 |
| 5  | 0.415422 | C | 1 |
| 24 | 0.807546 | C | 1 |
| 6  | 0.42114  | C | 1 |
| 8  | 0.15697  | C | 1 |
| 9  | 0.279758 | C | 1 |
| 22 | 0.507574 | I | 0 |
| 6  | 0.246138 | C | 1 |
| 6  | 0.461008 | F | 0 |
| 1  | 0.439887 | E | 1 |
| 22 | 0.547908 | C | 1 |
| 24 | 0.807546 | C | 1 |
| 6  | 0.17402  | C | 1 |
| 1  | 0.439887 | E | 1 |

|    |          |   |   |
|----|----------|---|---|
| 18 | 0.647212 | F | 0 |
| 14 | 0.521816 | C | 1 |
| 6  | 0.42114  | C | 1 |
| 23 | 0.20752  | F | 0 |
| 6  | 0.602636 | F | 0 |
| 8  | 0.15697  | C | 1 |
| 16 | 0.594942 | C | 1 |
| 6  | 0.383992 | I | 0 |
| 1  | 0.689606 | K | 1 |
| 6  | 0.487858 | C | 1 |
| 9  | 0.416065 | C | 1 |
| 6  | 0.246138 | C | 1 |
| 4  | 0.378781 | C | 1 |
| 2  | 0.403488 | C | 1 |
| 2  | 0.403488 | C | 1 |
| 15 | 0.419181 | C | 1 |
| 9  | 0.340463 | C | 1 |
| 9  | 0.618203 | C | 1 |
| 22 | 0.547908 | C | 1 |
| 5  | 0.540682 | N | 0 |
| 1  | 0.658169 | C | 1 |
| 24 | 0.623791 | S | 0 |
| 12 | 0.464944 | C | 1 |
| 7  | 0.212056 | M | 0 |
| 16 | 0.356441 | C | 1 |
| 9  | 0.505921 | C | 1 |
| 2  | 0.249563 | C | 1 |
| 9  | 0.823031 | E | 1 |
| 24 | 0.807546 | C | 1 |
| 22 | 0.685954 | C | 1 |
| 4  | 0.357037 | C | 1 |
| 14 | 0.521816 | C | 1 |
| 5  | 0.413305 | E | 1 |
| 4  | 0.314932 | C | 1 |
| 5  | 0.114533 | C | 1 |
| 10 | 0.519453 | C | 1 |
| 1  | 0.210181 | C | 1 |
| 4  | 0.378781 | C | 1 |
| 6  | 0.423144 | C | 1 |
| 6  | 0.292435 | C | 1 |
| 24 | 0.807546 | C | 1 |
| 6  | 0.126791 | C | 1 |
| 9  | 0.141365 | I | 0 |
| 5  | 0.442676 | C | 1 |
| 5  | 0.164701 | C | 1 |
| 14 | 0.521816 | C | 1 |
| 24 | 0.109292 | F | 0 |
| 6  | 0.423144 | C | 1 |
| 6  | 0.291393 | C | 1 |
| 22 | 0.685954 | C | 1 |
| 5  | 0.068284 | I | 0 |
| 6  | 0.368738 | C | 1 |
| 6  | 0.42114  | C | 1 |
| 1  | 0.755722 | C | 1 |



|    |          |   |   |
|----|----------|---|---|
| 4  | 0.496088 | C | 1 |
| 6  | 0.246138 | C | 1 |
| 9  | 0.823031 | E | 1 |
| 5  | 0.707056 | C | 1 |
| 9  | 0.336846 | C | 1 |
| 6  | 0.622371 | C | 1 |
| 6  | 0.126791 | C | 1 |
| 5  | 0.279065 | L | 0 |
| 7  | 0.160251 | C | 1 |
| 4  | 0.330314 | C | 1 |
| 7  | 0.428155 | C | 1 |
| 9  | 0.141365 | I | 0 |
| 4  | 0.527949 | C | 1 |
| 6  | 0.563653 | I | 0 |
| 6  | 0.17402  | C | 1 |
| 5  | 0.442676 | C | 1 |
| 6  | 0.622371 | C | 1 |
| 1  | 0.6422   | C | 1 |
| 8  | 0.330931 | C | 1 |
| 9  | 0.505921 | C | 1 |
| 4  | 0.314932 | C | 1 |
| 22 | 0.507574 | I | 0 |
| 24 | 0.623791 | S | 0 |
| 6  | 0.086373 | C | 1 |
| 4  | 0.527949 | C | 1 |
| 14 | 0.521816 | C | 1 |
| 6  | 0.246138 | C | 1 |
| 19 | 0.515829 | C | 1 |
| 1  | 0.6422   | C | 1 |
| 18 | 0.647212 | F | 0 |
| 19 | 0.711347 | C | 1 |
| 6  | 0.42114  | C | 1 |
| 6  | 0.473441 | C | 1 |
| 22 | 0.507574 | I | 0 |
| 1  | 0.689606 | K | 1 |
| 6  | 0.563653 | I | 0 |
| 9  | 0.505921 | C | 1 |
| 9  | 0.279758 | C | 1 |
| 9  | 0.503462 | C | 1 |
| 6  | 0.563653 | I | 0 |
| 6  | 0.602219 | E | 1 |
| 23 | 0.20752  | F | 0 |
| 6  | 0.36006  | I | 0 |
| 6  | 0.534231 | G | 0 |
| 9  | 0.279758 | C | 1 |
| 4  | 0.527949 | C | 1 |
| 7  | 0.563987 | C | 1 |
| 5  | 0.458569 | C | 1 |
| 5  | 0.143519 | C | 1 |
| 5  | 0.238085 | C | 1 |
| 5  | 0.707056 | C | 1 |
| 4  | 0.068284 | I | 0 |
| 9  | 0.279758 | C | 1 |
| 1  | 0.6422   | C | 1 |

|    |          |   |   |
|----|----------|---|---|
| 6  | 0.461008 | F | 0 |
| 6  | 0.472131 | C | 1 |
| 4  | 0.288384 | I | 0 |
| 6  | 0.20094  | C | 1 |
| 19 | 0.767378 | C | 1 |
| 6  | 0.338957 | C | 1 |
| 19 | 0.711347 | C | 1 |
| 5  | 0.426089 | C | 1 |
| 6  | 0.487858 | C | 1 |
| 4  | 0.288384 | I | 0 |
| 22 | 0.685954 | C | 1 |
| 5  | 0.426089 | C | 1 |
| 22 | 0.685954 | C | 1 |
| 23 | 0.592068 | D | 1 |
| 16 | 0.356441 | C | 1 |
| 23 | 0.20752  | F | 0 |
| 11 | 0.661481 | E | 1 |
| 5  | 0.618053 | C | 1 |
| 22 | 0.507574 | I | 0 |
| 9  | 0.416065 | C | 1 |
| 9  | 0.199965 | C | 1 |
| 7  | 0.428155 | C | 1 |
| 6  | 0.602636 | F | 0 |
| 6  | 0.338957 | C | 1 |
| 5  | 0.458569 | C | 1 |
| 7  | 0.670547 | C | 1 |
| 22 | 0.685954 | C | 1 |
| 6  | 0.42114  | C | 1 |
| 4  | 0.068284 | I | 0 |
| 5  | 0.287857 | C | 1 |
| 24 | 0.525907 | C | 1 |
| 8  | 0.446729 | C | 1 |
| 2  | 0.134513 | C | 1 |
| 6  | 0.338957 | C | 1 |
| 6  | 0.383111 | C | 1 |
| 5  | 0.458569 | C | 1 |
| 9  | 0.505921 | C | 1 |
| 6  | 0.423144 | C | 1 |
| 6  | 0.528441 | C | 1 |
| 9  | 0.279758 | C | 1 |
| 14 | 0.521816 | C | 1 |
| 9  | 0.32204  | C | 1 |
| 1  | 0.658169 | C | 1 |
| 6  | 0.563653 | I | 0 |
| 6  | 0.068284 | C | 1 |
| 6  | 0.338957 | C | 1 |
| 2  | 0.74903  | G | 0 |
| 5  | 0.143519 | C | 1 |
| 5  | 0.191254 | C | 1 |
| 6  | 0.656888 | C | 1 |
| 5  | 0.707056 | C | 1 |
| 7  | 0.160251 | C | 1 |
| 7  | 0.164378 | C | 1 |
| 4  | 0.544033 | C | 1 |

|    |          |   |   |
|----|----------|---|---|
| 9  | 0.503462 | C | 1 |
| 6  | 0.375173 | C | 1 |
| 14 | 0.521816 | C | 1 |
| 15 | 0.419181 | C | 1 |
| 14 | 0.521816 | C | 1 |
| 19 | 0.671215 | K | 1 |
| 14 | 0.521816 | C | 1 |
| 7  | 0.670547 | C | 1 |
| 8  | 0.437158 | C | 1 |
| 23 | 0.20752  | F | 0 |
| 10 | 0.519453 | C | 1 |
| 19 | 0.767378 | C | 1 |
| 6  | 0.506119 | I | 0 |
| 9  | 0.771515 | C | 1 |
| 9  | 0.279758 | C | 1 |
| 9  | 0.232685 | C | 1 |
| 10 | 0.752087 | C | 1 |
| 9  | 0.199965 | C | 1 |
| 6  | 0.602636 | F | 0 |
| 10 | 0.752087 | C | 1 |
| 7  | 0.558888 | K | 1 |
| 22 | 0.547908 | C | 1 |
| 1  | 0.6422   | C | 1 |
| 4  | 0.357037 | C | 1 |
| 22 | 0.547908 | C | 1 |
| 7  | 0.160251 | C | 1 |
| 22 | 0.685954 | C | 1 |
| 5  | 0.191254 | C | 1 |
| 6  | 0.338957 | C | 1 |
| 9  | 0.505921 | C | 1 |
| 9  | 0.823031 | E | 1 |
| 4  | 0.284344 | C | 1 |
| 24 | 0.525907 | C | 1 |
| 19 | 0.390353 | C | 1 |
| 6  | 0.327384 | C | 1 |
| 6  | 0.17402  | C | 1 |
| 22 | 0.685954 | C | 1 |
| 5  | 0.287857 | C | 1 |
| 6  | 0.210507 | C | 1 |
| 14 | 0.521816 | C | 1 |
| 21 | 0.708479 | C | 1 |
| 9  | 0.279758 | C | 1 |
| 6  | 0.473441 | C | 1 |
| 5  | 0.413305 | E | 1 |
| 4  | 0.330314 | C | 1 |
| 6  | 0.327384 | C | 1 |
| 16 | 0.594942 | C | 1 |
| 2  | 0.301934 | C | 1 |
| 8  | 0.446729 | C | 1 |
| 14 | 0.521816 | C | 1 |
| 9  | 0.771515 | C | 1 |
| 6  | 0.472131 | C | 1 |
| 20 | 0.660779 | C | 1 |
| 22 | 0.685954 | C | 1 |

|    |          |   |   |
|----|----------|---|---|
| 24 | 0.807546 | C | 1 |
| 6  | 0.473441 | C | 1 |
| 5  | 0.238085 | C | 1 |
| 8  | 0.446729 | C | 1 |
| 6  | 0.622371 | C | 1 |
| 5  | 0.279065 | L | 0 |
| 6  | 0.622371 | C | 1 |
| 19 | 0.671215 | K | 1 |
| 24 | 0.203456 | C | 1 |
| 19 | 0.671215 | K | 1 |
| 6  | 0.528441 | C | 1 |
| 9  | 0.141365 | I | 0 |
| 6  | 0.487858 | C | 1 |
| 7  | 0.563987 | C | 1 |
| 24 | 0.623791 | S | 0 |
| 19 | 0.711347 | C | 1 |
| 2  | 0.134513 | C | 1 |
| 9  | 0.32204  | C | 1 |
| 12 | 0.464944 | C | 1 |
| 6  | 0.534231 | G | 0 |
| 1  | 0.452568 | C | 1 |
| 8  | 0.446729 | C | 1 |
| 4  | 0.527949 | C | 1 |
| 21 | 0.365342 | C | 1 |
| 5  | 0.618053 | C | 1 |
| 8  | 0.205041 | C | 1 |
| 4  | 0.544033 | C | 1 |
| 5  | 0.618053 | C | 1 |
| 9  | 0.503462 | C | 1 |
| 14 | 0.521816 | C | 1 |
| 9  | 0.232685 | C | 1 |
| 5  | 0.191254 | C | 1 |
| 21 | 0.708479 | C | 1 |
| 12 | 0.464944 | C | 1 |
| 24 | 0.525907 | C | 1 |
| 22 | 0.685954 | C | 1 |
| 9  | 0.503462 | C | 1 |
| 1  | 0.545652 | E | 1 |
| 5  | 0.143519 | C | 1 |
| 8  | 0.15697  | C | 1 |
| 9  | 0.503462 | C | 1 |
| 15 | 0.419181 | C | 1 |
| 8  | 0.446729 | C | 1 |
| 6  | 0.563653 | I | 0 |
| 5  | 0.114533 | C | 1 |
| 6  | 0.487858 | C | 1 |
| 5  | 0.465051 | C | 1 |
| 16 | 0.594942 | C | 1 |
| 16 | 0.594942 | C | 1 |
| 14 | 0.521816 | C | 1 |
| 6  | 0.17402  | C | 1 |
| 21 | 0.365342 | C | 1 |
| 6  | 0.487858 | C | 1 |
| 8  | 0.446729 | C | 1 |

|    |          |   |   |
|----|----------|---|---|
| 19 | 0.410328 | F | 0 |
| 6  | 0.534231 | G | 0 |
| 4  | 0.314932 | C | 1 |
| 5  | 0.298363 | I | 0 |
| 20 | 0.660779 | C | 1 |
| 5  | 0.164701 | C | 1 |
| 6  | 0.461008 | F | 0 |
| 6  | 0.246138 | C | 1 |
| 5  | 0.415422 | C | 1 |
| 22 | 0.685954 | C | 1 |
| 6  | 0.528441 | C | 1 |
| 12 | 0.464944 | C | 1 |
| 5  | 0.458569 | C | 1 |
| 5  | 0.068284 | I | 0 |
| 5  | 0.287857 | C | 1 |
| 6  | 0.423144 | C | 1 |
| 9  | 0.279758 | C | 1 |
| 8  | 0.437158 | C | 1 |
| 10 | 0.752087 | C | 1 |
| 5  | 0.618053 | C | 1 |
| 5  | 0.301581 | C | 1 |
| 6  | 0.338957 | C | 1 |
| 2  | 0.196197 | C | 1 |
| 23 | 0.406989 | F | 0 |
| 8  | 0.446729 | C | 1 |
| 12 | 0.464944 | C | 1 |
| 9  | 0.32204  | C | 1 |
| 1  | 0.381617 | C | 1 |
| 14 | 0.521816 | C | 1 |
| 22 | 0.507574 | I | 0 |
| 5  | 0.540682 | N | 0 |
| 5  | 0.540682 | N | 0 |
| 22 | 0.507574 | I | 0 |
| 6  | 0.528441 | C | 1 |
| 9  | 0.32204  | C | 1 |
| 6  | 0.506119 | I | 0 |
| 9  | 0.771515 | C | 1 |
| 6  | 0.42114  | C | 1 |
| 6  | 0.506119 | I | 0 |
| 1  | 0.6422   | C | 1 |
| 5  | 0.465051 | C | 1 |
| 4  | 0.544033 | C | 1 |
| 6  | 0.472131 | C | 1 |
| 6  | 0.20094  | C | 1 |
| 5  | 0.402436 | I | 0 |
| 5  | 0.301581 | C | 1 |
| 23 | 0.592068 | D | 1 |
| 5  | 0.458569 | C | 1 |
| 6  | 0.375173 | C | 1 |
| 6  | 0.42114  | C | 1 |
| 5  | 0.238085 | C | 1 |
| 6  | 0.338957 | C | 1 |
| 22 | 0.547908 | C | 1 |
| 12 | 0.464944 | C | 1 |

|    |          |   |   |
|----|----------|---|---|
| 1  | 0.381617 | C | 1 |
| 19 | 0.711347 | C | 1 |
| 5  | 0.415422 | C | 1 |
| 5  | 0.426089 | C | 1 |
| 6  | 0.375173 | C | 1 |
| 19 | 0.767378 | C | 1 |
| 16 | 0.356441 | C | 1 |
| 16 | 0.356441 | C | 1 |
| 6  | 0.473441 | C | 1 |
| 12 | 0.464944 | C | 1 |
| 23 | 0.20752  | F | 0 |
| 6  | 0.472131 | C | 1 |
| 6  | 0.473441 | C | 1 |
| 23 | 0.581754 | F | 0 |
| 9  | 0.232685 | C | 1 |
| 9  | 0.416065 | C | 1 |
| 22 | 0.685954 | C | 1 |
| 6  | 0.473441 | C | 1 |
| 6  | 0.292435 | C | 1 |
| 10 | 0.752087 | C | 1 |
| 24 | 0.203456 | C | 1 |
| 15 | 0.419181 | C | 1 |
| 6  | 0.292435 | C | 1 |
| 6  | 0.116416 | I | 0 |
| 5  | 0.164701 | C | 1 |
| 5  | 0.618053 | C | 1 |
| 6  | 0.602636 | F | 0 |
| 20 | 0.660779 | C | 1 |
| 24 | 0.807546 | C | 1 |
| 5  | 0.707056 | C | 1 |
| 5  | 0.42834  | C | 1 |
| 8  | 0.266338 | I | 0 |
| 12 | 0.464944 | C | 1 |
| 9  | 0.771515 | C | 1 |
| 15 | 0.419181 | C | 1 |
| 4  | 0.330314 | C | 1 |
| 9  | 0.232685 | C | 1 |
| 1  | 0.210181 | C | 1 |
| 19 | 0.390353 | C | 1 |
| 22 | 0.685954 | C | 1 |
| 23 | 0.592068 | D | 1 |
| 6  | 0.506119 | I | 0 |
| 2  | 0.301934 | C | 1 |
| 1  | 0.452568 | C | 1 |
| 14 | 0.521816 | C | 1 |
| 14 | 0.521816 | C | 1 |
| 23 | 0.406989 | F | 0 |
| 6  | 0.116416 | I | 0 |
| 7  | 0.164378 | C | 1 |
| 7  | 0.160251 | C | 1 |
| 22 | 0.547908 | C | 1 |
| 6  | 0.338957 | C | 1 |
| 7  | 0.160251 | C | 1 |
| 1  | 0.658169 | C | 1 |

|    |          |   |   |
|----|----------|---|---|
| 4  | 0.314932 | C | 1 |
| 6  | 0.656888 | C | 1 |
| 6  | 0.528441 | C | 1 |
| 8  | 0.15697  | C | 1 |
| 13 | 0.46225  | I | 0 |
| 7  | 0.558888 | K | 1 |
| 6  | 0.292435 | C | 1 |
| 10 | 0.519453 | C | 1 |
| 1  | 0.452568 | C | 1 |
| 7  | 0.592966 | I | 0 |
| 10 | 0.752087 | C | 1 |
| 9  | 0.823031 | E | 1 |
| 4  | 0.496088 | C | 1 |
| 5  | 0.148224 | I | 0 |
| 19 | 0.515829 | C | 1 |
| 16 | 0.356441 | C | 1 |
| 10 | 0.752087 | C | 1 |
| 5  | 0.465051 | C | 1 |
| 2  | 0.196197 | C | 1 |
| 12 | 0.464944 | C | 1 |
| 6  | 0.126791 | C | 1 |
| 6  | 0.246138 | C | 1 |
| 6  | 0.506119 | I | 0 |
| 5  | 0.42834  | C | 1 |
| 5  | 0.426089 | C | 1 |
| 14 | 0.521816 | C | 1 |
| 8  | 0.446729 | C | 1 |
| 6  | 0.20094  | C | 1 |
| 24 | 0.109292 | F | 0 |
| 6  | 0.368738 | C | 1 |
| 5  | 0.442676 | C | 1 |
| 12 | 0.464944 | C | 1 |
| 12 | 0.464944 | C | 1 |
| 7  | 0.558888 | K | 1 |
| 19 | 0.711347 | C | 1 |
| 5  | 0.540682 | N | 0 |
| 22 | 0.685954 | C | 1 |
| 6  | 0.291393 | C | 1 |
| 6  | 0.473441 | C | 1 |
| 9  | 0.416065 | C | 1 |
| 15 | 0.419181 | C | 1 |
| 9  | 0.340463 | C | 1 |
| 5  | 0.540682 | N | 0 |
| 14 | 0.521816 | C | 1 |
| 7  | 0.592966 | I | 0 |
| 6  | 0.246138 | C | 1 |
| 4  | 0.527949 | C | 1 |
| 6  | 0.506119 | I | 0 |
| 4  | 0.288384 | I | 0 |
| 5  | 0.42834  | C | 1 |
| 6  | 0.116416 | I | 0 |
| 6  | 0.461008 | F | 0 |
| 5  | 0.618053 | C | 1 |
| 22 | 0.164936 | C | 1 |

|    |          |   |   |
|----|----------|---|---|
| 5  | 0.618053 | C | 1 |
| 19 | 0.767378 | C | 1 |
| 5  | 0.707056 | C | 1 |
| 4  | 0.330314 | C | 1 |
| 5  | 0.279065 | L | 0 |
| 7  | 0.160251 | C | 1 |
| 6  | 0.17402  | C | 1 |
| 5  | 0.618053 | C | 1 |
| 4  | 0.527949 | C | 1 |
| 24 | 0.623791 | S | 0 |
| 18 | 0.647212 | F | 0 |
| 9  | 0.618203 | C | 1 |
| 7  | 0.212056 | M | 0 |
| 1  | 0.689606 | K | 1 |
| 5  | 0.279065 | L | 0 |
| 6  | 0.42114  | C | 1 |
| 5  | 0.164701 | C | 1 |
| 6  | 0.48683  | C | 1 |
| 6  | 0.602636 | F | 0 |
| 4  | 0.544033 | C | 1 |
| 6  | 0.375173 | C | 1 |
| 2  | 0.403488 | C | 1 |
| 6  | 0.656888 | C | 1 |
| 14 | 0.521816 | C | 1 |
| 4  | 0.330314 | C | 1 |
| 22 | 0.685954 | C | 1 |
| 1  | 0.755722 | C | 1 |
| 5  | 0.402436 | I | 0 |
| 6  | 0.291393 | C | 1 |
| 23 | 0.406989 | F | 0 |
| 17 | 0.671569 | E | 1 |
| 5  | 0.413305 | E | 1 |
| 6  | 0.327384 | C | 1 |
| 6  | 0.368738 | C | 1 |
| 12 | 0.464944 | C | 1 |
| 4  | 0.284344 | C | 1 |
| 24 | 0.807546 | C | 1 |
| 6  | 0.333555 | I | 0 |
| 9  | 0.279758 | C | 1 |
| 23 | 0.20752  | F | 0 |
| 8  | 0.330931 | C | 1 |
| 5  | 0.42834  | C | 1 |
| 6  | 0.373642 | C | 1 |
| 6  | 0.375173 | C | 1 |
| 24 | 0.525907 | C | 1 |
| 8  | 0.205041 | C | 1 |
| 8  | 0.437158 | C | 1 |
| 18 | 0.647212 | F | 0 |
| 6  | 0.338957 | C | 1 |
| 14 | 0.521816 | C | 1 |
| 5  | 0.618053 | C | 1 |
| 6  | 0.622371 | C | 1 |
| 23 | 0.581754 | F | 0 |
| 14 | 0.521816 | C | 1 |



|    |          |   |   |
|----|----------|---|---|
| 6  | 0.36006  | I | 0 |
| 5  | 0.279065 | L | 0 |
| 8  | 0.446729 | C | 1 |
| 24 | 0.623791 | S | 0 |
| 9  | 0.503462 | C | 1 |
| 14 | 0.521816 | C | 1 |
| 14 | 0.521816 | C | 1 |
| 5  | 0.191254 | C | 1 |
| 14 | 0.521816 | C | 1 |
| 14 | 0.521816 | C | 1 |
| 14 | 0.521816 | C | 1 |
| 24 | 0.525907 | C | 1 |
| 8  | 0.205041 | C | 1 |
| 5  | 0.287857 | C | 1 |
| 9  | 0.823031 | E | 1 |
| 6  | 0.42114  | C | 1 |
| 4  | 0.527949 | C | 1 |
| 6  | 0.602636 | F | 0 |
| 4  | 0.527949 | C | 1 |
| 4  | 0.314932 | C | 1 |
| 5  | 0.442676 | C | 1 |
| 4  | 0.527949 | C | 1 |
| 4  | 0.527949 | C | 1 |
| 6  | 0.17402  | C | 1 |
| 19 | 0.410328 | F | 0 |
| 1  | 0.6422   | C | 1 |
| 1  | 0.689606 | K | 1 |
| 4  | 0.496088 | C | 1 |
| 6  | 0.36006  | I | 0 |
| 4  | 0.544033 | C | 1 |
| 4  | 0.544033 | C | 1 |
| 13 | 0.46225  | I | 0 |
| 9  | 0.771515 | C | 1 |
| 4  | 0.068284 | I | 0 |
| 4  | 0.330314 | C | 1 |
| 24 | 0.623791 | S | 0 |
| 5  | 0.301581 | C | 1 |
| 16 | 0.594942 | C | 1 |
| 9  | 0.505921 | C | 1 |
| 6  | 0.48683  | C | 1 |
| 6  | 0.291393 | C | 1 |
| 9  | 0.279758 | C | 1 |
| 2  | 0.196197 | C | 1 |
| 5  | 0.707056 | C | 1 |
| 17 | 0.671569 | E | 1 |
| 22 | 0.685954 | C | 1 |
| 7  | 0.428155 | C | 1 |
| 22 | 0.685954 | C | 1 |
| 4  | 0.527949 | C | 1 |
| 16 | 0.356441 | C | 1 |
| 5  | 0.42834  | C | 1 |
| 7  | 0.670547 | C | 1 |
| 5  | 0.540682 | N | 0 |
| 5  | 0.143519 | C | 1 |

|    |          |   |   |
|----|----------|---|---|
| 5  | 0.296087 | C | 1 |
| 22 | 0.685954 | C | 1 |
| 4  | 0.544033 | C | 1 |
| 8  | 0.437158 | C | 1 |
| 6  | 0.656888 | C | 1 |
| 6  | 0.20094  | C | 1 |
| 5  | 0.279065 | L | 0 |
| 22 | 0.685954 | C | 1 |
| 5  | 0.148224 | I | 0 |
| 16 | 0.356441 | C | 1 |
| 14 | 0.521816 | C | 1 |
| 16 | 0.356441 | C | 1 |
| 2  | 0.301934 | C | 1 |
| 5  | 0.618053 | C | 1 |
| 5  | 0.618053 | C | 1 |
| 16 | 0.356441 | C | 1 |
| 5  | 0.618053 | C | 1 |
| 5  | 0.618053 | C | 1 |
| 4  | 0.314932 | C | 1 |
| 7  | 0.212056 | M | 0 |
| 16 | 0.356441 | C | 1 |
| 11 | 0.661481 | E | 1 |
| 1  | 0.658169 | C | 1 |
| 10 | 0.519453 | C | 1 |
| 9  | 0.505921 | C | 1 |
| 9  | 0.340463 | C | 1 |
| 6  | 0.602636 | F | 0 |
| 12 | 0.464944 | C | 1 |
| 6  | 0.472131 | C | 1 |
| 4  | 0.378781 | C | 1 |
| 18 | 0.647212 | F | 0 |
| 5  | 0.148224 | I | 0 |
| 5  | 0.296087 | C | 1 |
| 6  | 0.338957 | C | 1 |
| 5  | 0.426089 | C | 1 |
| 9  | 0.618203 | C | 1 |
| 6  | 0.42114  | C | 1 |
| 5  | 0.540682 | N | 0 |
| 16 | 0.594942 | C | 1 |
| 23 | 0.581754 | F | 0 |
| 24 | 0.623791 | S | 0 |
| 22 | 0.685954 | C | 1 |
| 9  | 0.823031 | E | 1 |
| 6  | 0.338957 | C | 1 |
| 5  | 0.114533 | C | 1 |
| 24 | 0.623791 | S | 0 |
| 7  | 0.164378 | C | 1 |
| 22 | 0.685954 | C | 1 |
| 4  | 0.068284 | I | 0 |
| 5  | 0.191254 | C | 1 |
| 12 | 0.464944 | C | 1 |
| 12 | 0.464944 | C | 1 |
| 12 | 0.464944 | C | 1 |
| 6  | 0.461008 | F | 0 |

|    |          |   |   |
|----|----------|---|---|
| 24 | 0.525907 | C | 1 |
| 9  | 0.279758 | C | 1 |
| 9  | 0.505921 | C | 1 |
| 8  | 0.330931 | C | 1 |
| 6  | 0.563653 | I | 0 |
| 5  | 0.540682 | N | 0 |
| 10 | 0.519453 | C | 1 |
| 6  | 0.622371 | C | 1 |
| 8  | 0.330931 | C | 1 |
| 5  | 0.465051 | C | 1 |
| 6  | 0.36006  | I | 0 |
| 2  | 0.134513 | C | 1 |
| 2  | 0.249563 | C | 1 |
| 16 | 0.356441 | C | 1 |
| 6  | 0.246138 | C | 1 |
| 5  | 0.426089 | C | 1 |
| 12 | 0.464944 | C | 1 |
| 21 | 0.365342 | C | 1 |
| 12 | 0.464944 | C | 1 |
| 5  | 0.442676 | C | 1 |
| 17 | 0.671569 | E | 1 |
| 12 | 0.464944 | C | 1 |
| 2  | 0.301934 | C | 1 |
| 1  | 0.162806 | C | 1 |
| 9  | 0.232685 | C | 1 |
| 12 | 0.464944 | C | 1 |
| 19 | 0.711347 | C | 1 |
| 5  | 0.301581 | C | 1 |
| 6  | 0.246138 | C | 1 |
| 24 | 0.525907 | C | 1 |
| 6  | 0.20094  | C | 1 |
| 6  | 0.246138 | C | 1 |
| 6  | 0.534231 | G | 0 |
| 6  | 0.656888 | C | 1 |
| 5  | 0.458569 | C | 1 |
| 24 | 0.525907 | C | 1 |
| 6  | 0.622371 | C | 1 |
| 22 | 0.685954 | C | 1 |
| 22 | 0.507574 | I | 0 |
| 6  | 0.487858 | C | 1 |
| 5  | 0.114533 | C | 1 |
| 24 | 0.623791 | S | 0 |
| 7  | 0.164378 | C | 1 |
| 23 | 0.592068 | D | 1 |
| 6  | 0.327384 | C | 1 |
| 6  | 0.622371 | C | 1 |
| 6  | 0.126791 | C | 1 |
| 22 | 0.685954 | C | 1 |
| 11 | 0.661481 | E | 1 |
| 7  | 0.563987 | C | 1 |
| 8  | 0.15697  | C | 1 |
| 5  | 0.402436 | I | 0 |
| 22 | 0.685954 | C | 1 |
| 1  | 0.545652 | E | 1 |

|    |          |   |   |
|----|----------|---|---|
| 24 | 0.109292 | F | 0 |
| 6  | 0.210507 | C | 1 |
| 15 | 0.419181 | C | 1 |
| 6  | 0.656888 | C | 1 |
| 5  | 0.540682 | N | 0 |
| 5  | 0.707056 | C | 1 |
| 9  | 0.232685 | C | 1 |
| 22 | 0.685954 | C | 1 |
| 4  | 0.378781 | C | 1 |
| 6  | 0.42114  | C | 1 |
| 6  | 0.563653 | I | 0 |
| 6  | 0.602219 | E | 1 |
| 6  | 0.602219 | E | 1 |
| 6  | 0.602219 | E | 1 |
| 6  | 0.602219 | E | 1 |
| 6  | 0.602219 | E | 1 |
| 22 | 0.685954 | C | 1 |
| 1  | 0.381617 | C | 1 |
| 7  | 0.212056 | M | 0 |
| 6  | 0.42114  | C | 1 |
| 6  | 0.42114  | C | 1 |
| 6  | 0.461008 | F | 0 |
| 23 | 0.406989 | F | 0 |
| 9  | 0.340463 | C | 1 |
| 6  | 0.42114  | C | 1 |
| 6  | 0.48683  | C | 1 |
| 4  | 0.496088 | C | 1 |
| 9  | 0.199965 | C | 1 |
| 6  | 0.338957 | C | 1 |
| 6  | 0.563653 | I | 0 |
| 7  | 0.592966 | I | 0 |
| 8  | 0.266338 | I | 0 |
| 19 | 0.767378 | C | 1 |
| 22 | 0.685954 | C | 1 |
| 12 | 0.464944 | C | 1 |
| 4  | 0.288384 | I | 0 |
| 6  | 0.656888 | C | 1 |
| 4  | 0.357037 | C | 1 |
| 5  | 0.402436 | I | 0 |
| 6  | 0.656888 | C | 1 |
| 6  | 0.622371 | C | 1 |
| 22 | 0.685954 | C | 1 |
| 7  | 0.428155 | C | 1 |
| 22 | 0.685954 | C | 1 |
| 6  | 0.473441 | C | 1 |
| 7  | 0.670547 | C | 1 |
| 6  | 0.100288 | C | 1 |
| 22 | 0.685954 | C | 1 |
| 24 | 0.203456 | C | 1 |
| 24 | 0.525907 | C | 1 |
| 24 | 0.623791 | S | 0 |
| 6  | 0.656888 | C | 1 |
| 22 | 0.685954 | C | 1 |
| 22 | 0.685954 | C | 1 |

|    |          |   |   |
|----|----------|---|---|
| 7  | 0.428155 | C | 1 |
| 6  | 0.622371 | C | 1 |
| 19 | 0.671215 | K | 1 |
| 6  | 0.338957 | C | 1 |
| 9  | 0.279758 | C | 1 |
| 22 | 0.507574 | I | 0 |
| 22 | 0.685954 | C | 1 |
| 4  | 0.284344 | C | 1 |
| 22 | 0.685954 | C | 1 |
| 6  | 0.423144 | C | 1 |
| 24 | 0.807546 | C | 1 |
| 22 | 0.685954 | C | 1 |
| 6  | 0.473441 | C | 1 |
| 19 | 0.515829 | C | 1 |
| 6  | 0.423144 | C | 1 |
| 6  | 0.375173 | C | 1 |
| 1  | 0.689606 | K | 1 |
| 4  | 0.330314 | C | 1 |
| 6  | 0.423144 | C | 1 |
| 7  | 0.558888 | K | 1 |
| 6  | 0.327384 | C | 1 |
| 6  | 0.116416 | I | 0 |
| 5  | 0.415422 | C | 1 |
| 6  | 0.423144 | C | 1 |
| 4  | 0.288384 | I | 0 |
| 1  | 0.162806 | C | 1 |
| 4  | 0.527949 | C | 1 |
| 4  | 0.527949 | C | 1 |
| 21 | 0.365342 | C | 1 |
| 19 | 0.671215 | K | 1 |
| 24 | 0.623791 | S | 0 |
| 6  | 0.622371 | C | 1 |
| 5  | 0.618053 | C | 1 |
| 2  | 0.403488 | C | 1 |
| 9  | 0.771515 | C | 1 |
| 22 | 0.547908 | C | 1 |
| 21 | 0.708479 | C | 1 |
| 22 | 0.685954 | C | 1 |
| 6  | 0.086373 | C | 1 |
| 6  | 0.563653 | I | 0 |
| 6  | 0.42114  | C | 1 |
| 5  | 0.415422 | C | 1 |
| 6  | 0.656888 | C | 1 |
| 2  | 0.301934 | C | 1 |
| 14 | 0.521816 | C | 1 |
| 17 | 0.671569 | E | 1 |
| 6  | 0.327384 | C | 1 |
| 6  | 0.327384 | C | 1 |
| 5  | 0.402436 | I | 0 |
| 6  | 0.373642 | C | 1 |
| 6  | 0.373642 | C | 1 |
| 1  | 0.381617 | C | 1 |
| 6  | 0.086373 | C | 1 |
| 8  | 0.15697  | C | 1 |

|    |          |   |   |
|----|----------|---|---|
| 5  | 0.296087 | C | 1 |
| 2  | 0.74903  | G | 0 |
| 24 | 0.109292 | F | 0 |
| 2  | 0.74903  | G | 0 |
| 22 | 0.547908 | C | 1 |
| 9  | 0.32204  | C | 1 |
| 5  | 0.465051 | C | 1 |
| 6  | 0.528441 | C | 1 |
| 1  | 0.658169 | C | 1 |
| 8  | 0.446729 | C | 1 |
| 22 | 0.164936 | C | 1 |
| 12 | 0.464944 | C | 1 |
| 6  | 0.528441 | C | 1 |
| 24 | 0.807546 | C | 1 |
| 6  | 0.42114  | C | 1 |
| 19 | 0.711347 | C | 1 |
| 6  | 0.48683  | C | 1 |
| 6  | 0.48683  | C | 1 |
| 6  | 0.48683  | C | 1 |
| 22 | 0.547908 | C | 1 |
| 5  | 0.707056 | C | 1 |
| 6  | 0.291393 | C | 1 |
| 5  | 0.298363 | I | 0 |
| 22 | 0.685954 | C | 1 |
| 22 | 0.507574 | I | 0 |
| 6  | 0.375173 | C | 1 |
| 6  | 0.375173 | C | 1 |
| 6  | 0.622371 | C | 1 |
| 12 | 0.464944 | C | 1 |
| 6  | 0.20094  | C | 1 |
| 4  | 0.544033 | C | 1 |
| 5  | 0.279065 | L | 0 |
| 16 | 0.594942 | C | 1 |
| 6  | 0.473441 | C | 1 |
| 5  | 0.114533 | C | 1 |
| 22 | 0.685954 | C | 1 |
| 6  | 0.327384 | C | 1 |
| 6  | 0.656888 | C | 1 |
| 6  | 0.534231 | G | 0 |
| 6  | 0.534231 | G | 0 |
| 6  | 0.534231 | G | 0 |
| 21 | 0.365342 | C | 1 |
| 23 | 0.20752  | F | 0 |
| 6  | 0.383992 | I | 0 |
| 15 | 0.419181 | C | 1 |
| 6  | 0.473441 | C | 1 |
| 6  | 0.068284 | C | 1 |
| 6  | 0.423144 | C | 1 |
| 24 | 0.623791 | S | 0 |
| 5  | 0.164701 | C | 1 |
| 6  | 0.622371 | C | 1 |
| 19 | 0.767378 | C | 1 |
| 6  | 0.622371 | C | 1 |
| 1  | 0.162806 | C | 1 |

|    |          |   |   |
|----|----------|---|---|
| 6  | 0.368738 | C | 1 |
| 19 | 0.410328 | F | 0 |
| 10 | 0.752087 | C | 1 |
| 6  | 0.210507 | C | 1 |
| 7  | 0.563987 | C | 1 |
| 6  | 0.338957 | C | 1 |
| 6  | 0.338957 | C | 1 |
| 6  | 0.338957 | C | 1 |
| 5  | 0.618053 | C | 1 |
| 4  | 0.527949 | C | 1 |
| 24 | 0.807546 | C | 1 |
| 6  | 0.246138 | C | 1 |
| 24 | 0.807546 | C | 1 |
| 6  | 0.602636 | F | 0 |
| 9  | 0.771515 | C | 1 |
| 19 | 0.767378 | C | 1 |
| 5  | 0.301581 | C | 1 |
| 24 | 0.623791 | S | 0 |
| 1  | 0.452568 | C | 1 |
| 1  | 0.452568 | C | 1 |
| 1  | 0.452568 | C | 1 |
| 1  | 0.452568 | C | 1 |
| 16 | 0.356441 | C | 1 |
| 5  | 0.426089 | C | 1 |
| 9  | 0.503462 | C | 1 |
| 6  | 0.42114  | C | 1 |
| 6  | 0.622371 | C | 1 |
| 24 | 0.623791 | S | 0 |
| 7  | 0.428155 | C | 1 |
| 4  | 0.544033 | C | 1 |
| 6  | 0.126791 | C | 1 |
| 9  | 0.505921 | C | 1 |
| 8  | 0.205041 | C | 1 |
| 7  | 0.558888 | K | 1 |
| 5  | 0.540682 | N | 0 |
| 23 | 0.592068 | D | 1 |
| 5  | 0.287857 | C | 1 |
| 24 | 0.807546 | C | 1 |
| 8  | 0.437158 | C | 1 |
| 7  | 0.428155 | C | 1 |
| 23 | 0.592068 | D | 1 |
| 24 | 0.807546 | C | 1 |
| 22 | 0.685954 | C | 1 |
| 5  | 0.426089 | C | 1 |
| 1  | 0.545652 | E | 1 |
| 4  | 0.284344 | C | 1 |
| 1  | 0.210181 | C | 1 |
| 24 | 0.623791 | S | 0 |
| 4  | 0.527949 | C | 1 |
| 5  | 0.426089 | C | 1 |
| 19 | 0.711347 | C | 1 |
| 6  | 0.086373 | C | 1 |
| 6  | 0.100288 | C | 1 |
| 1  | 0.162806 | C | 1 |

|    |          |   |   |
|----|----------|---|---|
| 5  | 0.287857 | C | 1 |
| 8  | 0.437158 | C | 1 |
| 22 | 0.685954 | C | 1 |
| 7  | 0.670547 | C | 1 |
| 22 | 0.685954 | C | 1 |
| 4  | 0.527949 | C | 1 |
| 2  | 0.403488 | C | 1 |
| 19 | 0.711347 | C | 1 |
| 8  | 0.446729 | C | 1 |
| 19 | 0.390353 | C | 1 |
| 19 | 0.711347 | C | 1 |
| 9  | 0.771515 | C | 1 |
| 9  | 0.232685 | C | 1 |
| 6  | 0.116416 | I | 0 |
| 9  | 0.32204  | C | 1 |
| 12 | 0.464944 | C | 1 |
| 7  | 0.428155 | C | 1 |
| 21 | 0.365342 | C | 1 |
| 6  | 0.327384 | C | 1 |
| 15 | 0.419181 | C | 1 |
| 19 | 0.515829 | C | 1 |
| 5  | 0.148224 | I | 0 |
| 24 | 0.623791 | S | 0 |
| 19 | 0.515829 | C | 1 |
| 19 | 0.515829 | C | 1 |
| 4  | 0.288384 | I | 0 |
| 6  | 0.36006  | I | 0 |
| 6  | 0.36006  | I | 0 |
| 19 | 0.711347 | C | 1 |
| 20 | 0.660779 | C | 1 |
| 6  | 0.563653 | I | 0 |
| 6  | 0.068284 | C | 1 |
| 21 | 0.365342 | C | 1 |
| 23 | 0.406989 | F | 0 |
| 9  | 0.279758 | C | 1 |
| 22 | 0.685954 | C | 1 |
| 6  | 0.338957 | C | 1 |
| 6  | 0.338957 | C | 1 |
| 21 | 0.708479 | C | 1 |
| 19 | 0.711347 | C | 1 |
| 2  | 0.134513 | C | 1 |
| 21 | 0.708479 | C | 1 |
| 10 | 0.752087 | C | 1 |
| 4  | 0.284344 | C | 1 |
| 24 | 0.623791 | S | 0 |
| 6  | 0.42114  | C | 1 |
| 7  | 0.558888 | K | 1 |
| 19 | 0.671215 | K | 1 |
| 6  | 0.373642 | C | 1 |
| 18 | 0.647212 | F | 0 |
| 9  | 0.771515 | C | 1 |
| 4  | 0.496088 | C | 1 |
| 9  | 0.771515 | C | 1 |
| 22 | 0.685954 | C | 1 |



|    |          |   |   |
|----|----------|---|---|
| 6  | 0.210507 | C | 1 |
| 19 | 0.671215 | K | 1 |
| 22 | 0.685954 | C | 1 |
| 6  | 0.487858 | C | 1 |
| 9  | 0.503462 | C | 1 |
| 5  | 0.540682 | N | 0 |
| 22 | 0.685954 | C | 1 |
| 8  | 0.446729 | C | 1 |
| 5  | 0.618053 | C | 1 |
| 24 | 0.109292 | F | 0 |
| 6  | 0.383992 | I | 0 |
| 6  | 0.373642 | C | 1 |
| 21 | 0.365342 | C | 1 |
| 9  | 0.141365 | I | 0 |
| 19 | 0.515829 | C | 1 |
| 22 | 0.685954 | C | 1 |
| 5  | 0.296087 | C | 1 |
| 6  | 0.086373 | C | 1 |
| 9  | 0.505921 | C | 1 |
| 22 | 0.685954 | C | 1 |
| 9  | 0.505921 | C | 1 |
| 9  | 0.505921 | C | 1 |
| 6  | 0.383111 | C | 1 |
| 9  | 0.279758 | C | 1 |
| 6  | 0.602219 | E | 1 |
| 4  | 0.284344 | C | 1 |
| 5  | 0.143519 | C | 1 |
| 19 | 0.515829 | C | 1 |
| 22 | 0.507574 | I | 0 |
| 6  | 0.383111 | C | 1 |
| 22 | 0.685954 | C | 1 |
| 5  | 0.707056 | C | 1 |
| 24 | 0.623791 | S | 0 |
| 6  | 0.622371 | C | 1 |
| 9  | 0.32204  | C | 1 |
| 19 | 0.515829 | C | 1 |
| 9  | 0.32204  | C | 1 |
| 19 | 0.767378 | C | 1 |
| 19 | 0.767378 | C | 1 |
| 19 | 0.515829 | C | 1 |
| 23 | 0.20752  | F | 0 |
| 19 | 0.711347 | C | 1 |
| 6  | 0.373642 | C | 1 |
| 6  | 0.086373 | C | 1 |
| 20 | 0.660779 | C | 1 |
| 24 | 0.623791 | S | 0 |
| 10 | 0.752087 | C | 1 |
| 24 | 0.623791 | S | 0 |
| 10 | 0.519453 | C | 1 |
| 10 | 0.519453 | C | 1 |
| 23 | 0.581754 | F | 0 |
| 1  | 0.658169 | C | 1 |
| 23 | 0.581754 | F | 0 |
| 5  | 0.707056 | C | 1 |

|    |          |   |   |
|----|----------|---|---|
| 19 | 0.671215 | K | 1 |
| 16 | 0.356441 | C | 1 |
| 22 | 0.685954 | C | 1 |
| 8  | 0.446729 | C | 1 |
| 23 | 0.581754 | F | 0 |
| 5  | 0.618053 | C | 1 |
| 5  | 0.068284 | I | 0 |
| 24 | 0.109292 | F | 0 |
| 11 | 0.661481 | E | 1 |
| 7  | 0.428155 | C | 1 |
| 23 | 0.592068 | D | 1 |
| 23 | 0.592068 | D | 1 |
| 9  | 0.823031 | E | 1 |
| 6  | 0.534231 | G | 0 |
| 9  | 0.232685 | C | 1 |
| 9  | 0.232685 | C | 1 |
| 22 | 0.685954 | C | 1 |
| 9  | 0.823031 | E | 1 |
| 9  | 0.505921 | C | 1 |
| 7  | 0.212056 | M | 0 |
| 5  | 0.618053 | C | 1 |
| 6  | 0.100288 | C | 1 |
| 24 | 0.109292 | F | 0 |
| 5  | 0.114533 | C | 1 |
| 9  | 0.618203 | C | 1 |
| 9  | 0.336846 | C | 1 |
| 24 | 0.623791 | S | 0 |
| 19 | 0.410328 | F | 0 |
| 24 | 0.525907 | C | 1 |
| 9  | 0.503462 | C | 1 |
| 6  | 0.292435 | C | 1 |
| 6  | 0.116416 | I | 0 |
| 15 | 0.419181 | C | 1 |
| 6  | 0.602636 | F | 0 |
| 9  | 0.503462 | C | 1 |
| 9  | 0.503462 | C | 1 |
| 9  | 0.771515 | C | 1 |
| 6  | 0.656888 | C | 1 |
| 6  | 0.622371 | C | 1 |
| 6  | 0.622371 | C | 1 |
| 4  | 0.544033 | C | 1 |
| 9  | 0.505921 | C | 1 |
| 22 | 0.685954 | C | 1 |
| 6  | 0.327384 | C | 1 |
| 9  | 0.823031 | E | 1 |
| 6  | 0.375173 | C | 1 |
| 5  | 0.415422 | C | 1 |
| 23 | 0.581754 | F | 0 |
| 24 | 0.525907 | C | 1 |
| 8  | 0.446729 | C | 1 |
| 8  | 0.446729 | C | 1 |
| 5  | 0.238085 | C | 1 |
| 24 | 0.525907 | C | 1 |
| 19 | 0.671215 | K | 1 |

|    |          |   |   |
|----|----------|---|---|
| 23 | 0.406989 | F | 0 |
| 7  | 0.558888 | K | 1 |
| 24 | 0.623791 | S | 0 |
| 6  | 0.327384 | C | 1 |
| 9  | 0.279758 | C | 1 |
| 20 | 0.660779 | C | 1 |
| 6  | 0.472131 | C | 1 |
| 5  | 0.287857 | C | 1 |
| 9  | 0.771515 | C | 1 |
| 23 | 0.406989 | F | 0 |
| 6  | 0.126791 | C | 1 |
| 18 | 0.647212 | F | 0 |
| 24 | 0.525907 | C | 1 |
| 19 | 0.767378 | C | 1 |
| 6  | 0.472131 | C | 1 |
| 18 | 0.647212 | F | 0 |
| 6  | 0.333555 | I | 0 |
| 2  | 0.249563 | C | 1 |
| 17 | 0.671569 | E | 1 |
| 24 | 0.525907 | C | 1 |
| 6  | 0.534231 | G | 0 |
| 6  | 0.210507 | C | 1 |
| 4  | 0.544033 | C | 1 |
| 8  | 0.266338 | I | 0 |
| 6  | 0.506119 | I | 0 |
| 6  | 0.327384 | C | 1 |
| 6  | 0.368738 | C | 1 |
| 1  | 0.439887 | E | 1 |
| 6  | 0.383992 | I | 0 |
| 4  | 0.314932 | C | 1 |
| 19 | 0.711347 | C | 1 |
| 19 | 0.767378 | C | 1 |
| 24 | 0.623791 | S | 0 |
| 6  | 0.656888 | C | 1 |
| 24 | 0.623791 | S | 0 |
| 4  | 0.357037 | C | 1 |
| 15 | 0.419181 | C | 1 |
| 8  | 0.446729 | C | 1 |
| 22 | 0.685954 | C | 1 |
| 8  | 0.15697  | C | 1 |
| 8  | 0.15697  | C | 1 |
| 5  | 0.442676 | C | 1 |
| 6  | 0.383111 | C | 1 |
| 6  | 0.20094  | C | 1 |
| 7  | 0.160251 | C | 1 |
| 19 | 0.711347 | C | 1 |
| 5  | 0.402436 | I | 0 |
| 1  | 0.755722 | C | 1 |
| 7  | 0.563987 | C | 1 |
| 6  | 0.20094  | C | 1 |
| 24 | 0.525907 | C | 1 |
| 4  | 0.357037 | C | 1 |
| 14 | 0.521816 | C | 1 |
| 5  | 0.148224 | I | 0 |

|    |          |   |   |
|----|----------|---|---|
| 9  | 0.505921 | C | 1 |
| 7  | 0.563987 | C | 1 |
| 16 | 0.594942 | C | 1 |
| 7  | 0.212056 | M | 0 |
| 6  | 0.423144 | C | 1 |
| 1  | 0.210181 | C | 1 |
| 18 | 0.647212 | F | 0 |
| 19 | 0.711347 | C | 1 |
| 14 | 0.521816 | C | 1 |
| 2  | 0.301934 | C | 1 |
| 5  | 0.191254 | C | 1 |
| 4  | 0.527949 | C | 1 |
| 5  | 0.465051 | C | 1 |
| 6  | 0.656888 | C | 1 |
| 6  | 0.292435 | C | 1 |
| 5  | 0.415422 | C | 1 |
| 6  | 0.42114  | C | 1 |
| 8  | 0.446729 | C | 1 |
| 6  | 0.42114  | C | 1 |
| 5  | 0.298363 | I | 0 |
| 24 | 0.623791 | S | 0 |
| 22 | 0.685954 | C | 1 |
| 7  | 0.164378 | C | 1 |
| 8  | 0.330931 | C | 1 |
| 8  | 0.266338 | I | 0 |
| 13 | 0.46225  | I | 0 |
| 5  | 0.458569 | C | 1 |
| 24 | 0.623791 | S | 0 |
| 7  | 0.164378 | C | 1 |
| 24 | 0.623791 | S | 0 |
| 6  | 0.622371 | C | 1 |
| 1  | 0.439887 | E | 1 |
| 6  | 0.210507 | C | 1 |
| 22 | 0.685954 | C | 1 |
| 11 | 0.661481 | E | 1 |
| 5  | 0.238085 | C | 1 |
| 7  | 0.164378 | C | 1 |
| 21 | 0.708479 | C | 1 |
| 6  | 0.126791 | C | 1 |
| 6  | 0.383992 | I | 0 |
| 5  | 0.287857 | C | 1 |
| 1  | 0.658169 | C | 1 |
| 11 | 0.661481 | E | 1 |
| 8  | 0.446729 | C | 1 |
| 6  | 0.423144 | C | 1 |
| 1  | 0.452568 | C | 1 |
| 1  | 0.6422   | C | 1 |
| 8  | 0.446729 | C | 1 |
| 6  | 0.602219 | E | 1 |
| 5  | 0.143519 | C | 1 |
| 14 | 0.521816 | C | 1 |
| 6  | 0.368738 | C | 1 |
| 6  | 0.534231 | G | 0 |
| 9  | 0.416065 | C | 1 |

|    |          |   |   |
|----|----------|---|---|
| 9  | 0.416065 | C | 1 |
| 4  | 0.527949 | C | 1 |
| 1  | 0.439887 | E | 1 |
| 9  | 0.823031 | E | 1 |
| 7  | 0.160251 | C | 1 |
| 9  | 0.279758 | C | 1 |
| 5  | 0.301581 | C | 1 |
| 19 | 0.671215 | K | 1 |
| 4  | 0.527949 | C | 1 |
| 6  | 0.086373 | C | 1 |
| 6  | 0.210507 | C | 1 |
| 14 | 0.521816 | C | 1 |
| 6  | 0.375173 | C | 1 |
| 22 | 0.685954 | C | 1 |
| 1  | 0.689606 | K | 1 |
| 9  | 0.416065 | C | 1 |
| 4  | 0.288384 | I | 0 |
| 22 | 0.685954 | C | 1 |
| 6  | 0.42114  | C | 1 |
| 1  | 0.296023 | C | 1 |
| 6  | 0.534231 | G | 0 |
| 1  | 0.381617 | C | 1 |
| 6  | 0.48683  | C | 1 |
| 4  | 0.165735 | I | 0 |
| 9  | 0.423662 | C | 1 |
| 9  | 0.423662 | C | 1 |
| 2  | 0.243246 | C | 1 |
| 4  | 0.240662 | C | 1 |
| 6  | 0.602485 | C | 1 |
| 6  | 0.602485 | C | 1 |
| 6  | 0.602485 | C | 1 |
| 4  | 0.240662 | C | 1 |
| 4  | 0.530022 | C | 1 |
| 7  | 0.275168 | C | 1 |
| 4  | 0.165735 | I | 0 |
| 2  | 0.371255 | C | 1 |
| 4  | 0.530022 | C | 1 |
| 4  | 0.240662 | C | 1 |
| 4  | 0.261398 | C | 1 |
| 4  | 0.240662 | C | 1 |
| 4  | 0.240662 | C | 1 |
| 4  | 0.165735 | I | 0 |
| 7  | 0.275168 | C | 1 |
| 16 | 0.404609 | C | 1 |
| 5  | 0.227771 | C | 1 |
| 5  | 0.109748 | B | 1 |
| 7  | 0.275168 | C | 1 |
| 16 | 0.404609 | C | 1 |
| 2  | 0.243246 | C | 1 |
| 10 | 0.440223 | C | 1 |
| 6  | 0.602485 | C | 1 |
| 9  | 0.423662 | C | 1 |
| 5  | 0.227771 | C | 1 |
| 1  | 0.429711 | N | 0 |

|    |          |   |   |
|----|----------|---|---|
| 4  | 0.261398 | C | 1 |
| 4  | 0.165735 | I | 0 |
| 1  | 0.271588 | C | 1 |
| 1  | 0.271588 | C | 1 |
| 1  | 0.271588 | C | 1 |
| 1  | 0.271588 | C | 1 |
| 2  | 0.371255 | C | 1 |
| 6  | 0.602485 | C | 1 |
| 16 | 0.404609 | C | 1 |
| 6  | 0.602485 | C | 1 |
| 7  | 0.275168 | C | 1 |
| 1  | 0.429711 | N | 0 |
| 2  | 0.371255 | C | 1 |
| 7  | 0.275168 | C | 1 |
| 6  | 0.602485 | C | 1 |
| 1  | 0.429711 | N | 0 |
| 9  | 0.423662 | C | 1 |
| 2  | 0.371255 | C | 1 |
| 6  | 0.602485 | C | 1 |
| 6  | 0.602485 | C | 1 |
| 6  | 0.602485 | C | 1 |
| 16 | 0.404609 | C | 1 |
| 6  | 0.602485 | C | 1 |
| 5  | 0.109748 | B | 1 |
| 16 | 0.404609 | C | 1 |
| 10 | 0.440223 | C | 1 |
| 9  | 0.423662 | C | 1 |
| 5  | 0.109748 | B | 1 |
| 7  | 0.275168 | C | 1 |
| 2  | 0.243246 | C | 1 |
| 6  | 0.602485 | C | 1 |
| 2  | 0.243246 | C | 1 |
| 4  | 0.165735 | I | 0 |
| 16 | 0.404609 | C | 1 |
| 6  | 0.602485 | C | 1 |
| 5  | 0.109748 | B | 1 |
| 4  | 0.165735 | I | 0 |
| 9  | 0.423662 | C | 1 |
| 6  | 0.602485 | C | 1 |
| 4  | 0.530022 | C | 1 |
| 16 | 0.404609 | C | 1 |
| 1  | 0.429711 | N | 0 |
| 9  | 0.423662 | C | 1 |
| 2  | 0.371255 | C | 1 |
| 7  | 0.275168 | C | 1 |
| 4  | 0.530022 | C | 1 |
| 2  | 0.371255 | C | 1 |
| 6  | 0.602485 | C | 1 |
| 5  | 0.227771 | C | 1 |
| 5  | 0.109748 | B | 1 |
| 10 | 0.440223 | C | 1 |
| 4  | 0.530022 | C | 1 |
| 10 | 0.440223 | C | 1 |
| 4  | 0.261398 | C | 1 |

|    |          |   |   |
|----|----------|---|---|
| 1  | 0.429711 | N | 0 |
| 16 | 0.404609 | C | 1 |
| 7  | 0.275168 | C | 1 |
| 4  | 0.240662 | C | 1 |
| 16 | 0.404609 | C | 1 |
| 7  | 0.275168 | C | 1 |
| 6  | 0.602485 | C | 1 |
| 10 | 0.440223 | C | 1 |
| 2  | 0.243246 | C | 1 |
| 9  | 0.423662 | C | 1 |
| 7  | 0.275168 | C | 1 |
| 1  | 0.271588 | C | 1 |
| 6  | 0.602485 | C | 1 |
| 9  | 0.423662 | C | 1 |
| 2  | 0.243246 | C | 1 |
| 16 | 0.404609 | C | 1 |
| 5  | 0.109748 | B | 1 |
| 2  | 0.371255 | C | 1 |
| 7  | 0.275168 | C | 1 |
| 5  | 0.109748 | B | 1 |
| 4  | 0.240662 | C | 1 |
| 7  | 0.275168 | C | 1 |
| 6  | 0.602485 | C | 1 |
| 1  | 0.271588 | C | 1 |
| 16 | 0.404609 | C | 1 |
| 7  | 0.275168 | C | 1 |
| 4  | 0.165735 | I | 0 |
| 1  | 0.208188 | C | 1 |
| 6  | 0.351621 | C | 1 |
| 12 | 0.222927 | N | 0 |
| 1  | 0.331506 | C | 1 |
| 6  | 0.577767 | C | 1 |
| 6  | 0.351621 | C | 1 |
| 6  | 0.351621 | C | 1 |
| 1  | 0.467704 | C | 1 |
| 1  | 0.467704 | C | 1 |
| 6  | 0.577767 | C | 1 |
| 17 | 0.493238 | C | 1 |
| 7  | 0.309633 | C | 1 |
| 10 | 0.15789  | C | 1 |
| 1  | 0.284978 | C | 1 |
| 6  | 0.577767 | C | 1 |
| 12 | 0.222927 | N | 0 |
| 10 | 0.15789  | C | 1 |
| 6  | 0.351621 | C | 1 |
| 6  | 0.351621 | C | 1 |
| 11 | 0.191915 | C | 1 |
| 17 | 0.493238 | C | 1 |
| 1  | 0.114198 | C | 1 |
| 1  | 0.114198 | C | 1 |
| 1  | 0.467704 | C | 1 |
| 1  | 0.284978 | C | 1 |
| 12 | 0.222927 | N | 0 |
| 7  | 0.309633 | C | 1 |

|    |          |   |   |
|----|----------|---|---|
| 1  | 0.331506 | C | 1 |
| 1  | 0.284978 | C | 1 |
| 17 | 0.493238 | C | 1 |
| 7  | 0.309633 | C | 1 |
| 1  | 0.467704 | C | 1 |
| 1  | 0.114198 | C | 1 |
| 6  | 0.577767 | C | 1 |
| 7  | 0.309633 | C | 1 |
| 17 | 0.493238 | C | 1 |
| 1  | 0.284978 | C | 1 |
| 7  | 0.309633 | C | 1 |
| 12 | 0.222927 | N | 0 |
| 7  | 0.309633 | C | 1 |
| 1  | 0.331506 | C | 1 |
| 7  | 0.309633 | C | 1 |
| 11 | 0.191915 | C | 1 |
| 11 | 0.191915 | C | 1 |
| 17 | 0.493238 | C | 1 |
| 17 | 0.493238 | C | 1 |
| 1  | 0.331506 | C | 1 |
| 6  | 0.351621 | C | 1 |
| 1  | 0.114198 | C | 1 |
| 1  | 0.208188 | C | 1 |
| 17 | 0.493238 | C | 1 |
| 1  | 0.331506 | C | 1 |
| 17 | 0.493238 | C | 1 |
| 11 | 0.191915 | C | 1 |
| 1  | 0.467704 | C | 1 |
| 1  | 0.208188 | C | 1 |
| 1  | 0.114198 | C | 1 |
| 17 | 0.493238 | C | 1 |
| 6  | 0.577767 | C | 1 |
| 1  | 0.467704 | C | 1 |
| 1  | 0.467704 | C | 1 |
| 6  | 0.351621 | C | 1 |
| 12 | 0.222927 | N | 0 |
| 1  | 0.467704 | C | 1 |
| 6  | 0.577767 | C | 1 |
| 11 | 0.191915 | C | 1 |
| 12 | 0.222927 | N | 0 |
| 6  | 0.351621 | C | 1 |
| 7  | 0.309633 | C | 1 |
| 17 | 0.493238 | C | 1 |
| 1  | 0.331506 | C | 1 |
| 1  | 0.284978 | C | 1 |
| 10 | 0.15789  | C | 1 |
| 10 | 0.15789  | C | 1 |
| 12 | 0.222927 | N | 0 |
| 10 | 0.15789  | C | 1 |
| 23 | 0.282296 | C | 1 |
| 14 | 0.669667 | C | 1 |
| 14 | 0.669667 | C | 1 |
| 23 | 0.282296 | C | 1 |
| 23 | 0.282296 | C | 1 |



|    |          |   |   |
|----|----------|---|---|
| 23 | 0.282296 | C | 1 |
| 14 | 0.669667 | C | 1 |
| 14 | 0.669667 | C | 1 |
| 23 | 0.282296 | C | 1 |
| 14 | 0.669667 | C | 1 |
| 23 | 0.282296 | C | 1 |
| 23 | 0.282296 | C | 1 |
| 23 | 0.282296 | C | 1 |
| 23 | 0.282296 | C | 1 |
| 14 | 0.669667 | C | 1 |
| 23 | 0.282296 | C | 1 |
| 23 | 0.282296 | C | 1 |
| 14 | 0.669667 | C | 1 |
| 23 | 0.282296 | C | 1 |
| 14 | 0.669667 | C | 1 |
| 13 | 0.391326 | C | 1 |
| 6  | 0.412487 | A | 0 |
| 6  | 0.412487 | A | 0 |
| 6  | 0.412487 | A | 0 |
| 13 | 0.391326 | C | 1 |
| 6  | 0.412487 | A | 0 |
| 13 | 0.391326 | C | 1 |
| 13 | 0.391326 | C | 1 |
| 13 | 0.391326 | C | 1 |
| 6  | 0.412487 | A | 0 |
| 6  | 0.412487 | A | 0 |
| 18 | 0.441028 | C | 1 |
| 5  | 0.382996 | C | 1 |
| 18 | 0.441028 | C | 1 |
| 5  | 0.382996 | C | 1 |
| 5  | 0.267432 | C | 1 |
| 5  | 0.267432 | C | 1 |
| 5  | 0.382996 | C | 1 |
| 18 | 0.441028 | C | 1 |
| 18 | 0.441028 | C | 1 |
| 18 | 0.441028 | C | 1 |
| 18 | 0.441028 | C | 1 |
| 18 | 0.441028 | C | 1 |
| 5  | 0.382996 | C | 1 |
| 5  | 0.267432 | C | 1 |
| 5  | 0.267432 | C | 1 |
| 5  | 0.267432 | C | 1 |
| 5  | 0.382996 | C | 1 |
| 5  | 0.382996 | C | 1 |
| 12 | 0.350598 | C | 1 |
| 12 | 0.350598 | C | 1 |
| 12 | 0.350598 | C | 1 |
| 20 | 0.695448 | C | 1 |
| 12 | 0.350598 | C | 1 |
| 12 | 0.350598 | C | 1 |
| 12 | 0.350598 | C | 1 |
| 12 | 0.350598 | C | 1 |
| 15 | 0.68896  | C | 1 |
| 15 | 0.68896  | C | 1 |
| 12 | 0.350598 | C | 1 |

|    |          |   |   |
|----|----------|---|---|
| 15 | 0.68896  | C | 1 |
| 15 | 0.68896  | C | 1 |
| 12 | 0.350598 | C | 1 |
| 20 | 0.695448 | C | 1 |
| 20 | 0.695448 | C | 1 |
| 15 | 0.68896  | C | 1 |
| 19 | 0.577563 | C | 1 |
| 18 | 0.294267 | C | 1 |
| 18 | 0.294267 | C | 1 |
| 19 | 0.577563 | C | 1 |
| 18 | 0.294267 | C | 1 |
| 18 | 0.294267 | C | 1 |
| 18 | 0.294267 | C | 1 |
| 19 | 0.577563 | C | 1 |
| 19 | 0.577563 | C | 1 |
| 19 | 0.577563 | C | 1 |
| 18 | 0.294267 | C | 1 |
| 18 | 0.294267 | C | 1 |
| 19 | 0.577563 | C | 1 |
| 18 | 0.294267 | C | 1 |
| 18 | 0.294267 | C | 1 |
| 18 | 0.294267 | C | 1 |
| 13 | 0.255482 | C | 1 |
| 14 | 0.265493 | C | 1 |
| 13 | 0.255482 | C | 1 |
| 13 | 0.255482 | C | 1 |
| 13 | 0.255482 | C | 1 |
| 14 | 0.265493 | C | 1 |
| 14 | 0.265493 | C | 1 |
| 14 | 0.265493 | C | 1 |
| 13 | 0.255482 | C | 1 |
| 13 | 0.255482 | C | 1 |
| 13 | 0.255482 | C | 1 |
| 13 | 0.255482 | C | 1 |
| 13 | 0.255482 | C | 1 |
| 14 | 0.265493 | C | 1 |
| 14 | 0.265493 | C | 1 |
| 14 | 0.265493 | C | 1 |
| 13 | 0.255482 | C | 1 |
| 15 | 0.157622 | C | 1 |
| 6  | 0.075564 | C | 1 |
| 15 | 0.157622 | C | 1 |
| 6  | 0.075564 | C | 1 |
| 6  | 0.075564 | C | 1 |
| 15 | 0.157622 | C | 1 |
| 15 | 0.157622 | C | 1 |
| 15 | 0.157622 | C | 1 |
| 15 | 0.157622 | C | 1 |
| 6  | 0.075564 | C | 1 |
| 6  | 0.075564 | C | 1 |
| 15 | 0.157622 | C | 1 |
| 1  | 0.148349 | C | 1 |
| 2  | 0.125705 | C | 1 |
| 1  | 0.148349 | C | 1 |
| 1  | 0.313495 | C | 1 |

|    |          |   |   |
|----|----------|---|---|
| 1  | 0.313495 | C | 1 |
| 6  | 0.28352  | C | 1 |
| 2  | 0.125705 | C | 1 |
| 2  | 0.125705 | C | 1 |
| 1  | 0.313495 | C | 1 |
| 6  | 0.28352  | C | 1 |
| 1  | 0.148349 | C | 1 |
| 1  | 0.148349 | C | 1 |
| 1  | 0.313495 | C | 1 |
| 6  | 0.28352  | C | 1 |
| 2  | 0.125705 | C | 1 |
| 2  | 0.125705 | C | 1 |
| 6  | 0.28352  | C | 1 |
| 6  | 0.28352  | C | 1 |
| 1  | 0.313495 | C | 1 |
| 1  | 0.313495 | C | 1 |
| 6  | 0.28352  | C | 1 |
| 1  | 0.148349 | C | 1 |
| 6  | 0.28352  | C | 1 |
| 6  | 0.28352  | C | 1 |
| 8  | 0.48117  | C | 1 |
| 8  | 0.48117  | C | 1 |
| 8  | 0.48117  | C | 1 |
| 8  | 0.48117  | C | 1 |
| 8  | 0.48117  | C | 1 |
| 8  | 0.48117  | C | 1 |
| 8  | 0.48117  | C | 1 |
| 8  | 0.48117  | C | 1 |
| 8  | 0.48117  | C | 1 |
| 8  | 0.48117  | C | 1 |
| 8  | 0.48117  | C | 1 |
| 8  | 0.48117  | C | 1 |
| 18 | 0.545409 | C | 1 |
| 4  | 0.120811 | C | 1 |
| 6  | 0.41392  | C | 1 |
| 6  | 0.198216 | C | 1 |
| 5  | 0.102846 | C | 1 |
| 5  | 0.272676 | C | 1 |
| 15 | 0.638847 | C | 1 |
| 6  | 0.198216 | C | 1 |
| 6  | 0.198216 | C | 1 |
| 19 | 0.405371 | C | 1 |
| 19 | 0.405371 | C | 1 |
| 6  | 0.284221 | C | 1 |
| 18 | 0.545409 | C | 1 |
| 5  | 0.335094 | C | 1 |
| 6  | 0.467796 | C | 1 |
| 5  | 0.335094 | C | 1 |
| 6  | 0.404183 | E | 1 |
| 1  | 0.260314 | C | 1 |
| 19 | 0.405371 | C | 1 |
| 17 | 0.214637 | C | 1 |
| 15 | 0.638847 | C | 1 |
| 4  | 0.120811 | C | 1 |
| 2  | 0.196462 | C | 1 |

|    |          |   |   |
|----|----------|---|---|
| 6  | 0.198216 | C | 1 |
| 6  | 0.198216 | C | 1 |
| 5  | 0.272676 | C | 1 |
| 6  | 0.467796 | C | 1 |
| 17 | 0.214637 | C | 1 |
| 8  | 0.168818 | C | 1 |
| 6  | 0.467796 | C | 1 |
| 6  | 0.23883  | A | 0 |
| 6  | 0.198216 | C | 1 |
| 6  | 0.246477 | C | 1 |
| 4  | 0.120811 | C | 1 |
| 6  | 0.467796 | C | 1 |
| 17 | 0.214637 | C | 1 |
| 1  | 0.260314 | C | 1 |
| 17 | 0.214637 | C | 1 |
| 6  | 0.467796 | C | 1 |
| 6  | 0.198216 | C | 1 |
| 17 | 0.214637 | C | 1 |
| 8  | 0.711783 | C | 1 |
| 18 | 0.545409 | C | 1 |
| 6  | 0.198216 | C | 1 |
| 2  | 0.196462 | C | 1 |
| 8  | 0.168818 | C | 1 |
| 6  | 0.198216 | C | 1 |
| 5  | 0.272676 | C | 1 |
| 18 | 0.545409 | C | 1 |
| 1  | 0.260314 | C | 1 |
| 6  | 0.23883  | A | 0 |
| 2  | 0.196462 | C | 1 |
| 8  | 0.168818 | C | 1 |
| 6  | 0.246477 | C | 1 |
| 6  | 0.404183 | E | 1 |
| 5  | 0.102846 | C | 1 |
| 6  | 0.198216 | C | 1 |
| 6  | 0.198216 | C | 1 |
| 5  | 0.272676 | C | 1 |
| 8  | 0.711783 | C | 1 |
| 6  | 0.23883  | A | 0 |
| 6  | 0.198216 | C | 1 |
| 4  | 0.120811 | C | 1 |
| 1  | 0.23917  | G | 0 |
| 6  | 0.404183 | E | 1 |
| 19 | 0.405371 | C | 1 |
| 19 | 0.405371 | C | 1 |
| 5  | 0.335094 | C | 1 |
| 18 | 0.545409 | C | 1 |
| 5  | 0.272676 | C | 1 |
| 19 | 0.405371 | C | 1 |
| 6  | 0.246477 | C | 1 |
| 18 | 0.545409 | C | 1 |
| 6  | 0.404183 | E | 1 |
| 6  | 0.246477 | C | 1 |
| 6  | 0.246477 | C | 1 |
| 8  | 0.168818 | C | 1 |

|    |          |   |   |
|----|----------|---|---|
| 19 | 0.405371 | C | 1 |
| 8  | 0.168818 | C | 1 |
| 15 | 0.638847 | C | 1 |
| 19 | 0.405371 | C | 1 |
| 6  | 0.246477 | C | 1 |
| 6  | 0.467796 | C | 1 |
| 4  | 0.277405 | C | 1 |
| 18 | 0.545409 | C | 1 |
| 6  | 0.467796 | C | 1 |
| 6  | 0.41392  | C | 1 |
| 4  | 0.277405 | C | 1 |
| 15 | 0.638847 | C | 1 |
| 6  | 0.467796 | C | 1 |
| 19 | 0.405371 | C | 1 |
| 8  | 0.168818 | C | 1 |
| 5  | 0.102846 | C | 1 |
| 15 | 0.638847 | C | 1 |
| 4  | 0.277405 | C | 1 |
| 8  | 0.711783 | C | 1 |
| 8  | 0.168818 | C | 1 |
| 11 | 0.18047  | A | 0 |
| 11 | 0.18047  | A | 0 |
| 15 | 0.638847 | C | 1 |
| 8  | 0.711783 | C | 1 |
| 18 | 0.545409 | C | 1 |
| 6  | 0.284221 | C | 1 |
| 18 | 0.545409 | C | 1 |
| 18 | 0.545409 | C | 1 |
| 6  | 0.198216 | C | 1 |
| 5  | 0.102846 | C | 1 |
| 6  | 0.284221 | C | 1 |
| 18 | 0.545409 | C | 1 |
| 5  | 0.272676 | C | 1 |
| 19 | 0.405371 | C | 1 |
| 4  | 0.277405 | C | 1 |
| 2  | 0.196462 | C | 1 |
| 11 | 0.18047  | A | 0 |
| 11 | 0.18047  | A | 0 |
| 15 | 0.638847 | C | 1 |
| 6  | 0.404183 | E | 1 |
| 8  | 0.711783 | C | 1 |
| 8  | 0.168818 | C | 1 |
| 6  | 0.404183 | E | 1 |
| 6  | 0.198216 | C | 1 |
| 5  | 0.272676 | C | 1 |
| 6  | 0.467796 | C | 1 |
| 6  | 0.41392  | C | 1 |
| 8  | 0.168818 | C | 1 |
| 1  | 0.23917  | G | 0 |
| 5  | 0.102846 | C | 1 |
| 15 | 0.638847 | C | 1 |
| 2  | 0.196462 | C | 1 |
| 11 | 0.18047  | A | 0 |
| 5  | 0.102846 | C | 1 |

|    |          |   |   |
|----|----------|---|---|
| 1  | 0.23917  | G | 0 |
| 4  | 0.120811 | C | 1 |
| 5  | 0.102846 | C | 1 |
| 17 | 0.214637 | C | 1 |
| 5  | 0.102846 | C | 1 |
| 15 | 0.638847 | C | 1 |
| 4  | 0.277405 | C | 1 |
| 18 | 0.545409 | C | 1 |
| 5  | 0.102846 | C | 1 |
| 6  | 0.404183 | E | 1 |
| 4  | 0.277405 | C | 1 |
| 18 | 0.545409 | C | 1 |
| 15 | 0.638847 | C | 1 |
| 17 | 0.214637 | C | 1 |
| 4  | 0.120811 | C | 1 |
| 8  | 0.168818 | C | 1 |
| 19 | 0.405371 | C | 1 |
| 4  | 0.277405 | C | 1 |
| 6  | 0.191519 | C | 1 |
| 6  | 0.51519  | G | 0 |
| 6  | 0.452753 | C | 1 |
| 6  | 0.068284 | C | 1 |
| 13 | 0.68279  | C | 1 |
| 14 | 0.725495 | C | 1 |
| 5  | 0.294027 | C | 1 |
| 13 | 0.68279  | C | 1 |
| 6  | 0.452753 | C | 1 |
| 6  | 0.191519 | C | 1 |
| 6  | 0.191519 | C | 1 |
| 6  | 0.068284 | C | 1 |
| 14 | 0.725495 | C | 1 |
| 6  | 0.452753 | C | 1 |
| 6  | 0.068284 | C | 1 |
| 5  | 0.294027 | C | 1 |
| 13 | 0.68279  | C | 1 |
| 14 | 0.725495 | C | 1 |
| 6  | 0.452753 | C | 1 |
| 6  | 0.452753 | C | 1 |
| 5  | 0.294027 | C | 1 |
| 13 | 0.68279  | C | 1 |
| 6  | 0.452753 | C | 1 |
| 6  | 0.51519  | G | 0 |
| 6  | 0.068284 | C | 1 |
| 5  | 0.294027 | C | 1 |
| 6  | 0.068284 | C | 1 |
| 6  | 0.191519 | C | 1 |
| 5  | 0.294027 | C | 1 |
| 13 | 0.68279  | C | 1 |
| 5  | 0.294027 | C | 1 |
| 6  | 0.51519  | G | 0 |
| 6  | 0.452753 | C | 1 |
| 6  | 0.191519 | C | 1 |
| 6  | 0.191519 | C | 1 |
| 6  | 0.452753 | C | 1 |

|    |          |   |   |
|----|----------|---|---|
| 14 | 0.725495 | C | 1 |
| 14 | 0.725495 | C | 1 |
| 14 | 0.725495 | C | 1 |
| 5  | 0.294027 | C | 1 |
| 6  | 0.452753 | C | 1 |
| 6  | 0.068284 | C | 1 |
| 5  | 0.294027 | C | 1 |
| 13 | 0.68279  | C | 1 |
| 6  | 0.452753 | C | 1 |
| 5  | 0.294027 | C | 1 |
| 6  | 0.51519  | G | 0 |
| 5  | 0.294027 | C | 1 |
| 6  | 0.191519 | C | 1 |
| 14 | 0.725495 | C | 1 |
| 6  | 0.51519  | G | 0 |
| 5  | 0.294027 | C | 1 |
| 6  | 0.191519 | C | 1 |
| 15 | 0.255182 | C | 1 |
| 15 | 0.255182 | C | 1 |
| 15 | 0.255182 | C | 1 |
| 22 | 0.582156 | S | 0 |
| 5  | 0.458804 | C | 1 |
| 9  | 0.915508 | C | 1 |
| 22 | 0.582156 | S | 0 |
| 10 | 0.196583 | I | 0 |
| 9  | 0.094881 | C | 1 |
| 5  | 0.265513 | C | 1 |
| 9  | 0.915508 | C | 1 |
| 9  | 0.094881 | C | 1 |
| 2  | 0.359892 | C | 1 |
| 23 | 0.325153 | C | 1 |
| 23 | 0.325153 | C | 1 |
| 2  | 0.359892 | C | 1 |
| 9  | 0.094881 | C | 1 |
| 6  | 0.225691 | C | 1 |
| 6  | 0.117233 | C | 1 |
| 23 | 0.325153 | C | 1 |
| 6  | 0.225691 | C | 1 |
| 12 | 0.421909 | C | 1 |
| 5  | 0.265513 | C | 1 |
| 9  | 0.915508 | C | 1 |
| 5  | 0.265513 | C | 1 |
| 6  | 0.225691 | C | 1 |
| 22 | 0.582156 | S | 0 |
| 1  | 0.144835 | C | 1 |
| 10 | 0.196583 | I | 0 |
| 2  | 0.359892 | C | 1 |
| 23 | 0.325153 | C | 1 |
| 6  | 0.117233 | C | 1 |
| 2  | 0.359892 | C | 1 |
| 2  | 0.359892 | C | 1 |
| 9  | 0.915508 | C | 1 |
| 6  | 0.117233 | C | 1 |
| 23 | 0.325153 | C | 1 |

|    |          |   |   |
|----|----------|---|---|
| 6  | 0.131382 | I | 0 |
| 6  | 0.225691 | C | 1 |
| 10 | 0.196583 | I | 0 |
| 1  | 0.144835 | C | 1 |
| 23 | 0.325153 | C | 1 |
| 6  | 0.225691 | C | 1 |
| 23 | 0.325153 | C | 1 |
| 23 | 0.325153 | C | 1 |
| 5  | 0.458804 | C | 1 |
| 5  | 0.458804 | C | 1 |
| 23 | 0.325153 | C | 1 |
| 22 | 0.582156 | S | 0 |
| 5  | 0.265513 | C | 1 |
| 5  | 0.265513 | C | 1 |
| 10 | 0.196583 | I | 0 |
| 5  | 0.265513 | C | 1 |
| 9  | 0.915508 | C | 1 |
| 1  | 0.144835 | C | 1 |
| 23 | 0.325153 | C | 1 |
| 23 | 0.325153 | C | 1 |
| 5  | 0.265513 | C | 1 |
| 9  | 0.094881 | C | 1 |
| 9  | 0.094881 | C | 1 |
| 1  | 0.144835 | C | 1 |
| 10 | 0.196583 | I | 0 |
| 23 | 0.325153 | C | 1 |
| 12 | 0.421909 | C | 1 |
| 2  | 0.359892 | C | 1 |
| 1  | 0.144835 | C | 1 |
| 2  | 0.359892 | C | 1 |
| 6  | 0.131382 | I | 0 |
| 22 | 0.582156 | S | 0 |
| 6  | 0.117233 | C | 1 |
| 6  | 0.131382 | I | 0 |
| 6  | 0.117233 | C | 1 |
| 9  | 0.915508 | C | 1 |
| 1  | 0.144835 | C | 1 |
| 6  | 0.225691 | C | 1 |
| 5  | 0.265513 | C | 1 |
| 6  | 0.225691 | C | 1 |
| 5  | 0.458804 | C | 1 |
| 6  | 0.131382 | I | 0 |
| 6  | 0.117233 | C | 1 |
| 2  | 0.359892 | C | 1 |
| 6  | 0.117233 | C | 1 |
| 5  | 0.458804 | C | 1 |
| 5  | 0.458804 | C | 1 |
| 23 | 0.325153 | C | 1 |
| 6  | 0.131382 | I | 0 |
| 23 | 0.325153 | C | 1 |
| 12 | 0.421909 | C | 1 |
| 9  | 0.094881 | C | 1 |
| 6  | 0.225691 | C | 1 |
| 5  | 0.458804 | C | 1 |



|    |          |   |   |
|----|----------|---|---|
| 22 | 0.582156 | S | 0 |
| 23 | 0.325153 | C | 1 |
| 23 | 0.325153 | C | 1 |
| 23 | 0.325153 | C | 1 |
| 5  | 0.458804 | C | 1 |
| 6  | 0.131382 | I | 0 |
| 12 | 0.421909 | C | 1 |
| 5  | 0.265513 | C | 1 |
| 6  | 0.117233 | C | 1 |
| 6  | 0.117233 | C | 1 |
| 5  | 0.458804 | C | 1 |
| 9  | 0.094881 | C | 1 |
| 6  | 0.117233 | C | 1 |
| 9  | 0.915508 | C | 1 |
| 10 | 0.196583 | I | 0 |
| 6  | 0.131382 | I | 0 |
| 5  | 0.458804 | C | 1 |
| 2  | 0.359892 | C | 1 |
| 6  | 0.117233 | C | 1 |
| 2  | 0.359892 | C | 1 |
| 2  | 0.359892 | C | 1 |
| 9  | 0.915508 | C | 1 |
| 7  | 0.693846 | E | 1 |
| 6  | 0.117952 | I | 0 |
| 22 | 0.280758 | S | 0 |
| 6  | 0.117952 | I | 0 |
| 6  | 0.117952 | I | 0 |
| 7  | 0.693846 | E | 1 |
| 22 | 0.280758 | S | 0 |
| 19 | 0.425401 | C | 1 |
| 19 | 0.425401 | C | 1 |
| 22 | 0.280758 | S | 0 |
| 6  | 0.483285 | C | 1 |
| 22 | 0.280758 | S | 0 |
| 6  | 0.483285 | C | 1 |
| 6  | 0.117952 | I | 0 |
| 6  | 0.117952 | I | 0 |
| 22 | 0.280758 | S | 0 |
| 6  | 0.483285 | C | 1 |
| 7  | 0.693846 | E | 1 |
| 19 | 0.425401 | C | 1 |
| 6  | 0.483285 | C | 1 |
| 6  | 0.117952 | I | 0 |
| 6  | 0.483285 | C | 1 |
| 19 | 0.425401 | C | 1 |
| 22 | 0.280758 | S | 0 |
| 22 | 0.280758 | S | 0 |
| 19 | 0.425401 | C | 1 |
| 6  | 0.117952 | I | 0 |
| 22 | 0.280758 | S | 0 |
| 6  | 0.117952 | I | 0 |
| 22 | 0.280758 | S | 0 |
| 19 | 0.425401 | C | 1 |
| 22 | 0.280758 | S | 0 |

|    |          |   |   |
|----|----------|---|---|
| 22 | 0.280758 | S | 0 |
| 7  | 0.693846 | E | 1 |
| 6  | 0.117952 | I | 0 |
| 6  | 0.483285 | C | 1 |
| 6  | 0.117952 | I | 0 |
| 6  | 0.483285 | C | 1 |
| 7  | 0.693846 | E | 1 |
| 22 | 0.280758 | S | 0 |
| 19 | 0.425401 | C | 1 |
| 22 | 0.280758 | S | 0 |
| 7  | 0.693846 | E | 1 |
| 6  | 0.483285 | C | 1 |
| 6  | 0.483285 | C | 1 |
| 6  | 0.117952 | I | 0 |
| 6  | 0.483285 | C | 1 |
| 6  | 0.117952 | I | 0 |
| 19 | 0.646672 | C | 1 |
| 19 | 0.646672 | C | 1 |
| 19 | 0.646672 | C | 1 |
| 6  | 0.615236 | C | 1 |
| 6  | 0.615236 | C | 1 |
| 6  | 0.615236 | C | 1 |
| 6  | 0.615236 | C | 1 |
| 6  | 0.615236 | C | 1 |
| 6  | 0.615236 | C | 1 |
| 18 | 0.730221 | C | 1 |
| 18 | 0.730221 | C | 1 |
| 16 | 0.472265 | C | 1 |
| 18 | 0.730221 | C | 1 |
| 16 | 0.472265 | C | 1 |
| 16 | 0.472265 | C | 1 |
| 16 | 0.472265 | C | 1 |
| 18 | 0.730221 | C | 1 |
| 18 | 0.730221 | C | 1 |
| 18 | 0.730221 | C | 1 |
| 16 | 0.472265 | C | 1 |
| 16 | 0.472265 | C | 1 |
| 16 | 0.472265 | C | 1 |
| 18 | 0.730221 | C | 1 |
| 19 | 0.749285 | C | 1 |
| 2  | 0.254856 | C | 1 |
| 2  | 0.254856 | C | 1 |
| 22 | 0.678854 | C | 1 |
| 19 | 0.749285 | C | 1 |
| 20 | 0.507345 | C | 1 |
| 4  | 0.073211 | C | 1 |
| 22 | 0.713722 | C | 1 |
| 22 | 0.713722 | C | 1 |
| 6  | 0.162212 | C | 1 |
| 22 | 0.713722 | C | 1 |
| 2  | 0.254856 | C | 1 |
| 5  | 0.269029 | C | 1 |
| 5  | 0.269029 | C | 1 |
| 20 | 0.507345 | C | 1 |

|    |          |   |   |
|----|----------|---|---|
| 20 | 0.507345 | C | 1 |
| 7  | 0.221763 | C | 1 |
| 22 | 0.678854 | C | 1 |
| 6  | 0.162212 | C | 1 |
| 20 | 0.507345 | C | 1 |
| 7  | 0.221763 | C | 1 |
| 5  | 0.269029 | C | 1 |
| 22 | 0.678854 | C | 1 |
| 2  | 0.254856 | C | 1 |
| 16 | 0.551411 | C | 1 |
| 20 | 0.507345 | C | 1 |
| 19 | 0.749285 | C | 1 |
| 20 | 0.507345 | C | 1 |
| 20 | 0.507345 | C | 1 |
| 19 | 0.749285 | C | 1 |
| 16 | 0.551411 | C | 1 |
| 22 | 0.713722 | C | 1 |
| 4  | 0.073211 | C | 1 |
| 22 | 0.678854 | C | 1 |
| 7  | 0.221763 | C | 1 |
| 1  | 0.267081 | C | 1 |
| 16 | 0.551411 | C | 1 |
| 22 | 0.678854 | C | 1 |
| 5  | 0.269029 | C | 1 |
| 5  | 0.146842 | C | 1 |
| 6  | 0.162212 | C | 1 |
| 20 | 0.507345 | C | 1 |
| 6  | 0.162212 | C | 1 |
| 1  | 0.267081 | C | 1 |
| 5  | 0.146842 | C | 1 |
| 16 | 0.551411 | C | 1 |
| 22 | 0.678854 | C | 1 |
| 20 | 0.507345 | C | 1 |
| 4  | 0.073211 | C | 1 |
| 5  | 0.269029 | C | 1 |
| 6  | 0.162212 | C | 1 |
| 2  | 0.254856 | C | 1 |
| 22 | 0.713722 | C | 1 |
| 22 | 0.678854 | C | 1 |
| 20 | 0.507345 | C | 1 |
| 22 | 0.678854 | C | 1 |
| 22 | 0.678854 | C | 1 |
| 22 | 0.678854 | C | 1 |
| 19 | 0.749285 | C | 1 |
| 22 | 0.713722 | C | 1 |
| 22 | 0.678854 | C | 1 |
| 5  | 0.146842 | C | 1 |
| 5  | 0.146842 | C | 1 |
| 19 | 0.749285 | C | 1 |
| 22 | 0.713722 | C | 1 |
| 22 | 0.713722 | C | 1 |
| 4  | 0.073211 | C | 1 |
| 5  | 0.146842 | C | 1 |
| 6  | 0.162212 | C | 1 |

|    |          |   |   |
|----|----------|---|---|
| 22 | 0.678854 | C | 1 |
| 5  | 0.146842 | C | 1 |
| 2  | 0.254856 | C | 1 |
| 2  | 0.254856 | C | 1 |
| 2  | 0.254856 | C | 1 |
| 7  | 0.221763 | C | 1 |
| 22 | 0.713722 | C | 1 |
| 19 | 0.749285 | C | 1 |
| 20 | 0.507345 | C | 1 |
| 6  | 0.162212 | C | 1 |
| 20 | 0.507345 | C | 1 |
| 22 | 0.678854 | C | 1 |
| 19 | 0.749285 | C | 1 |
| 1  | 0.267081 | C | 1 |
| 4  | 0.073211 | C | 1 |
| 22 | 0.678854 | C | 1 |
| 19 | 0.749285 | C | 1 |
| 20 | 0.507345 | C | 1 |
| 2  | 0.254856 | C | 1 |
| 22 | 0.678854 | C | 1 |
| 5  | 0.269029 | C | 1 |
| 4  | 0.073211 | C | 1 |
| 19 | 0.749285 | C | 1 |
| 19 | 0.749285 | C | 1 |
| 22 | 0.713722 | C | 1 |
| 5  | 0.146842 | C | 1 |
| 19 | 0.749285 | C | 1 |
| 22 | 0.713722 | C | 1 |
| 7  | 0.221763 | C | 1 |
| 16 | 0.551411 | C | 1 |
| 6  | 0.162212 | C | 1 |
| 16 | 0.551411 | C | 1 |
| 22 | 0.678854 | C | 1 |
| 6  | 0.162212 | C | 1 |
| 6  | 0.162212 | C | 1 |
| 6  | 0.162212 | C | 1 |
| 16 | 0.551411 | C | 1 |
| 19 | 0.178959 | I | 0 |
| 6  | 0.078775 | C | 1 |
| 6  | 0.078775 | C | 1 |
| 19 | 0.178959 | I | 0 |
| 19 | 0.178959 | I | 0 |
| 6  | 0.078775 | C | 1 |
| 6  | 0.078775 | C | 1 |
| 6  | 0.078775 | C | 1 |
| 6  | 0.078775 | C | 1 |
| 6  | 0.171056 | C | 1 |
| 5  | 0.200676 | C | 1 |
| 19 | 0.418729 | L | 0 |
| 6  | 0.601325 | E | 1 |
| 12 | 0.615795 | C | 1 |
| 19 | 0.350887 | C | 1 |
| 14 | 0.653374 | C | 1 |
| 11 | 0.361035 | C | 1 |

|    |          |   |   |
|----|----------|---|---|
| 6  | 0.265839 | C | 1 |
| 6  | 0.601325 | E | 1 |
| 12 | 0.615795 | C | 1 |
| 4  | 0.165921 | C | 1 |
| 14 | 0.675121 | C | 1 |
| 17 | 0.206764 | C | 1 |
| 19 | 0.140569 | C | 1 |
| 6  | 0.601325 | E | 1 |
| 4  | 0.44775  | C | 1 |
| 10 | 0.380349 | C | 1 |
| 2  | 0.209527 | C | 1 |
| 14 | 0.675121 | C | 1 |
| 12 | 0.262634 | C | 1 |
| 12 | 0.290971 | C | 1 |
| 14 | 0.675121 | C | 1 |
| 5  | 0.375877 | C | 1 |
| 6  | 0.171056 | C | 1 |
| 17 | 0.206764 | C | 1 |
| 8  | 0.085926 | C | 1 |
| 12 | 0.290971 | C | 1 |
| 13 | 0.565124 | C | 1 |
| 8  | 0.297207 | C | 1 |
| 19 | 0.350887 | C | 1 |
| 6  | 0.171056 | C | 1 |
| 14 | 0.675121 | C | 1 |
| 2  | 0.209527 | C | 1 |
| 14 | 0.653374 | C | 1 |
| 5  | 0.200676 | C | 1 |
| 12 | 0.615795 | C | 1 |
| 14 | 0.675121 | C | 1 |
| 5  | 0.200676 | C | 1 |
| 12 | 0.419551 | C | 1 |
| 11 | 0.361035 | C | 1 |
| 2  | 0.340437 | C | 1 |
| 5  | 0.200676 | C | 1 |
| 11 | 0.361035 | C | 1 |
| 14 | 0.653374 | C | 1 |
| 12 | 0.262634 | C | 1 |
| 19 | 0.350887 | C | 1 |
| 12 | 0.262634 | C | 1 |
| 11 | 0.361035 | C | 1 |
| 12 | 0.262634 | C | 1 |
| 12 | 0.290971 | C | 1 |
| 4  | 0.068284 | R | 0 |
| 12 | 0.615795 | C | 1 |
| 4  | 0.165921 | C | 1 |
| 12 | 0.290971 | C | 1 |
| 14 | 0.675121 | C | 1 |
| 12 | 0.615795 | C | 1 |
| 14 | 0.653374 | C | 1 |
| 4  | 0.068284 | R | 0 |
| 14 | 0.675121 | C | 1 |
| 8  | 0.297207 | C | 1 |
| 6  | 0.171056 | C | 1 |

|    |          |   |   |
|----|----------|---|---|
| 4  | 0.165921 | C | 1 |
| 6  | 0.601325 | E | 1 |
| 5  | 0.151213 | C | 1 |
| 19 | 0.140569 | C | 1 |
| 14 | 0.653374 | C | 1 |
| 8  | 0.085926 | C | 1 |
| 12 | 0.262634 | C | 1 |
| 12 | 0.615795 | C | 1 |
| 14 | 0.653374 | C | 1 |
| 12 | 0.262634 | C | 1 |
| 16 | 0.41415  | C | 1 |
| 14 | 0.653374 | C | 1 |
| 10 | 0.380349 | C | 1 |
| 8  | 0.297207 | C | 1 |
| 12 | 0.262634 | C | 1 |
| 8  | 0.297207 | C | 1 |
| 12 | 0.419551 | C | 1 |
| 5  | 0.307085 | C | 1 |
| 12 | 0.615795 | C | 1 |
| 8  | 0.635792 | C | 1 |
| 4  | 0.44775  | C | 1 |
| 4  | 0.068284 | R | 0 |
| 4  | 0.44775  | C | 1 |
| 16 | 0.41415  | C | 1 |
| 13 | 0.565124 | C | 1 |
| 19 | 0.140569 | C | 1 |
| 14 | 0.675121 | C | 1 |
| 12 | 0.290971 | C | 1 |
| 12 | 0.262634 | C | 1 |
| 12 | 0.811585 | F | 0 |
| 12 | 0.615795 | C | 1 |
| 5  | 0.151213 | C | 1 |
| 12 | 0.615795 | C | 1 |
| 5  | 0.307085 | C | 1 |
| 12 | 0.290971 | C | 1 |
| 19 | 0.418729 | L | 0 |
| 12 | 0.615795 | C | 1 |
| 8  | 0.085926 | C | 1 |
| 14 | 0.675121 | C | 1 |
| 13 | 0.565124 | C | 1 |
| 13 | 0.565124 | C | 1 |
| 6  | 0.265839 | C | 1 |
| 10 | 0.380349 | C | 1 |
| 4  | 0.068284 | R | 0 |
| 12 | 0.290971 | C | 1 |
| 2  | 0.340437 | C | 1 |
| 19 | 0.350887 | C | 1 |
| 10 | 0.380349 | C | 1 |
| 10 | 0.380349 | C | 1 |
| 12 | 0.419551 | C | 1 |
| 12 | 0.615795 | C | 1 |
| 12 | 0.615795 | C | 1 |
| 5  | 0.375877 | C | 1 |
| 13 | 0.565124 | C | 1 |

|    |          |   |   |
|----|----------|---|---|
| 8  | 0.297207 | C | 1 |
| 14 | 0.653374 | C | 1 |
| 13 | 0.565124 | C | 1 |
| 5  | 0.44551  | C | 1 |
| 8  | 0.635792 | C | 1 |
| 12 | 0.811585 | F | 0 |
| 16 | 0.41415  | C | 1 |
| 12 | 0.615795 | C | 1 |
| 14 | 0.653374 | C | 1 |
| 10 | 0.380349 | C | 1 |
| 12 | 0.615795 | C | 1 |
| 10 | 0.380349 | C | 1 |
| 13 | 0.565124 | C | 1 |
| 6  | 0.11161  | C | 1 |
| 16 | 0.41415  | C | 1 |
| 5  | 0.44551  | C | 1 |
| 10 | 0.380349 | C | 1 |
| 5  | 0.307085 | C | 1 |
| 4  | 0.44775  | C | 1 |
| 14 | 0.653374 | C | 1 |
| 16 | 0.41415  | C | 1 |
| 4  | 0.165921 | C | 1 |
| 17 | 0.206764 | C | 1 |
| 14 | 0.653374 | C | 1 |
| 1  | 0.184821 | C | 1 |
| 12 | 0.290971 | C | 1 |
| 12 | 0.615795 | C | 1 |
| 17 | 0.206764 | C | 1 |
| 10 | 0.380349 | C | 1 |
| 13 | 0.565124 | C | 1 |
| 11 | 0.361035 | C | 1 |
| 13 | 0.565124 | C | 1 |
| 14 | 0.653374 | C | 1 |
| 14 | 0.675121 | C | 1 |
| 6  | 0.265839 | C | 1 |
| 12 | 0.615795 | C | 1 |
| 13 | 0.565124 | C | 1 |
| 1  | 0.184821 | C | 1 |
| 6  | 0.601325 | E | 1 |
| 10 | 0.380349 | C | 1 |
| 8  | 0.635792 | C | 1 |
| 13 | 0.565124 | C | 1 |
| 14 | 0.675121 | C | 1 |
| 12 | 0.262634 | C | 1 |
| 4  | 0.44775  | C | 1 |
| 6  | 0.601325 | E | 1 |
| 12 | 0.615795 | C | 1 |
| 19 | 0.350887 | C | 1 |
| 16 | 0.41415  | C | 1 |
| 8  | 0.297207 | C | 1 |
| 13 | 0.565124 | C | 1 |
| 16 | 0.41415  | C | 1 |
| 2  | 0.209527 | C | 1 |
| 5  | 0.307085 | C | 1 |

|    |          |   |   |
|----|----------|---|---|
| 12 | 0.290971 | C | 1 |
| 4  | 0.068284 | R | 0 |
| 11 | 0.361035 | C | 1 |
| 5  | 0.307085 | C | 1 |
| 19 | 0.350887 | C | 1 |
| 13 | 0.565124 | C | 1 |
| 12 | 0.419551 | C | 1 |
| 16 | 0.41415  | C | 1 |
| 2  | 0.340437 | C | 1 |
| 8  | 0.635792 | C | 1 |
| 12 | 0.290971 | C | 1 |
| 8  | 0.635792 | C | 1 |
| 12 | 0.615795 | C | 1 |
| 6  | 0.171056 | C | 1 |
| 12 | 0.811585 | F | 0 |
| 19 | 0.418729 | L | 0 |
| 5  | 0.307085 | C | 1 |
| 6  | 0.265839 | C | 1 |
| 5  | 0.307085 | C | 1 |
| 2  | 0.209527 | C | 1 |
| 5  | 0.307085 | C | 1 |
| 12 | 0.811585 | F | 0 |
| 19 | 0.350887 | C | 1 |
| 8  | 0.635792 | C | 1 |
| 4  | 0.068284 | R | 0 |
| 14 | 0.653374 | C | 1 |
| 8  | 0.635792 | C | 1 |
| 16 | 0.41415  | C | 1 |
| 12 | 0.615795 | C | 1 |
| 1  | 0.184821 | C | 1 |
| 14 | 0.653374 | C | 1 |
| 19 | 0.350887 | C | 1 |
| 5  | 0.200676 | C | 1 |
| 19 | 0.140569 | C | 1 |
| 19 | 0.418729 | L | 0 |
| 6  | 0.601325 | E | 1 |
| 5  | 0.44551  | C | 1 |
| 19 | 0.140569 | C | 1 |
| 10 | 0.380349 | C | 1 |
| 1  | 0.184821 | C | 1 |
| 19 | 0.140569 | C | 1 |
| 4  | 0.44775  | C | 1 |
| 5  | 0.44551  | C | 1 |
| 8  | 0.635792 | C | 1 |
| 10 | 0.380349 | C | 1 |
| 6  | 0.171056 | C | 1 |
| 19 | 0.140569 | C | 1 |
| 4  | 0.44775  | C | 1 |
| 12 | 0.419551 | C | 1 |
| 14 | 0.653374 | C | 1 |
| 5  | 0.44551  | C | 1 |
| 8  | 0.085926 | C | 1 |
| 4  | 0.44775  | C | 1 |
| 8  | 0.297207 | C | 1 |



|    |          |   |   |
|----|----------|---|---|
| 5  | 0.151213 | C | 1 |
| 14 | 0.653374 | C | 1 |
| 6  | 0.265839 | C | 1 |
| 14 | 0.675121 | C | 1 |
| 5  | 0.200676 | C | 1 |
| 13 | 0.565124 | C | 1 |
| 8  | 0.085926 | C | 1 |
| 12 | 0.615795 | C | 1 |
| 6  | 0.11161  | C | 1 |
| 12 | 0.615795 | C | 1 |
| 14 | 0.675121 | C | 1 |
| 4  | 0.068284 | R | 0 |
| 13 | 0.565124 | C | 1 |
| 10 | 0.380349 | C | 1 |
| 6  | 0.601325 | E | 1 |
| 5  | 0.44551  | C | 1 |
| 8  | 0.635792 | C | 1 |
| 12 | 0.615795 | C | 1 |
| 6  | 0.11161  | C | 1 |
| 12 | 0.262634 | C | 1 |
| 13 | 0.565124 | C | 1 |
| 12 | 0.615795 | C | 1 |
| 10 | 0.380349 | C | 1 |
| 12 | 0.615795 | C | 1 |
| 5  | 0.375877 | C | 1 |
| 2  | 0.209527 | C | 1 |
| 17 | 0.206764 | C | 1 |
| 5  | 0.375877 | C | 1 |
| 5  | 0.44551  | C | 1 |
| 6  | 0.171056 | C | 1 |
| 11 | 0.361035 | C | 1 |
| 6  | 0.171056 | C | 1 |
| 4  | 0.165921 | C | 1 |
| 5  | 0.44551  | C | 1 |
| 13 | 0.565124 | C | 1 |
| 2  | 0.209527 | C | 1 |
| 5  | 0.44551  | C | 1 |
| 12 | 0.419551 | C | 1 |
| 1  | 0.184821 | C | 1 |
| 4  | 0.165921 | C | 1 |
| 6  | 0.265839 | C | 1 |
| 14 | 0.653374 | C | 1 |
| 5  | 0.375877 | C | 1 |
| 6  | 0.171056 | C | 1 |
| 11 | 0.361035 | C | 1 |
| 12 | 0.290971 | C | 1 |
| 4  | 0.165921 | C | 1 |
| 16 | 0.41415  | C | 1 |
| 14 | 0.653374 | C | 1 |
| 8  | 0.085926 | C | 1 |
| 12 | 0.419551 | C | 1 |
| 12 | 0.615795 | C | 1 |
| 12 | 0.811585 | F | 0 |
| 13 | 0.565124 | C | 1 |

|    |          |   |   |
|----|----------|---|---|
| 5  | 0.44551  | C | 1 |
| 10 | 0.380349 | C | 1 |
| 6  | 0.171056 | C | 1 |
| 5  | 0.44551  | C | 1 |
| 12 | 0.615795 | C | 1 |
| 17 | 0.206764 | C | 1 |
| 6  | 0.171056 | C | 1 |
| 8  | 0.635792 | C | 1 |
| 12 | 0.615795 | C | 1 |
| 10 | 0.380349 | C | 1 |
| 12 | 0.262634 | C | 1 |
| 12 | 0.290971 | C | 1 |
| 19 | 0.140569 | C | 1 |
| 18 | 0.316596 | C | 1 |
| 22 | 0.665423 | C | 1 |
| 18 | 0.316596 | C | 1 |
| 1  | 0.219397 | C | 1 |
| 5  | 0.228447 | C | 1 |
| 1  | 0.219397 | C | 1 |
| 18 | 0.532696 | C | 1 |
| 18 | 0.316596 | C | 1 |
| 22 | 0.665423 | C | 1 |
| 22 | 0.665423 | C | 1 |
| 22 | 0.665423 | C | 1 |
| 8  | 0.263237 | C | 1 |
| 1  | 0.219397 | C | 1 |
| 5  | 0.228447 | C | 1 |
| 22 | 0.665423 | C | 1 |
| 1  | 0.219397 | C | 1 |
| 22 | 0.665423 | C | 1 |
| 6  | 0.608926 | G | 0 |
| 22 | 0.665423 | C | 1 |
| 18 | 0.73579  | C | 1 |
| 22 | 0.665423 | C | 1 |
| 5  | 0.228447 | C | 1 |
| 5  | 0.228447 | C | 1 |
| 8  | 0.263237 | C | 1 |
| 8  | 0.263237 | C | 1 |
| 22 | 0.665423 | C | 1 |
| 18 | 0.532696 | C | 1 |
| 18 | 0.532696 | C | 1 |
| 18 | 0.532696 | C | 1 |
| 5  | 0.228447 | C | 1 |
| 8  | 0.263237 | C | 1 |
| 22 | 0.665423 | C | 1 |
| 22 | 0.665423 | C | 1 |
| 8  | 0.263237 | C | 1 |
| 8  | 0.263237 | C | 1 |
| 18 | 0.316596 | C | 1 |
| 22 | 0.665423 | C | 1 |
| 18 | 0.316596 | C | 1 |
| 22 | 0.665423 | C | 1 |
| 18 | 0.316596 | C | 1 |
| 18 | 0.532696 | C | 1 |

|    |          |   |   |
|----|----------|---|---|
| 18 | 0.316596 | C | 1 |
| 8  | 0.263237 | C | 1 |
| 5  | 0.228447 | C | 1 |
| 5  | 0.228447 | C | 1 |
| 18 | 0.532696 | C | 1 |
| 22 | 0.665423 | C | 1 |
| 22 | 0.665423 | C | 1 |
| 5  | 0.228447 | C | 1 |
| 18 | 0.73579  | C | 1 |
| 18 | 0.73579  | C | 1 |
| 22 | 0.665423 | C | 1 |
| 1  | 0.219397 | C | 1 |
| 22 | 0.665423 | C | 1 |
| 22 | 0.665423 | C | 1 |
| 1  | 0.219397 | C | 1 |
| 18 | 0.532696 | C | 1 |
| 5  | 0.228447 | C | 1 |
| 18 | 0.532696 | C | 1 |
| 6  | 0.608926 | G | 0 |
| 22 | 0.665423 | C | 1 |
| 22 | 0.665423 | C | 1 |
| 5  | 0.228447 | C | 1 |
| 22 | 0.665423 | C | 1 |
| 18 | 0.532696 | C | 1 |
| 18 | 0.532696 | C | 1 |
| 1  | 0.219397 | C | 1 |
| 1  | 0.219397 | C | 1 |
| 18 | 0.316596 | C | 1 |
| 18 | 0.73579  | C | 1 |
| 18 | 0.316596 | C | 1 |
| 22 | 0.665423 | C | 1 |
| 22 | 0.665423 | C | 1 |
| 6  | 0.608926 | G | 0 |
| 22 | 0.665423 | C | 1 |
| 18 | 0.316596 | C | 1 |
| 18 | 0.532696 | C | 1 |
| 22 | 0.665423 | C | 1 |
| 22 | 0.665423 | C | 1 |
| 5  | 0.228447 | C | 1 |
| 16 | 0.680101 | C | 1 |
| 18 | 0.655232 | C | 1 |
| 16 | 0.680101 | C | 1 |
| 6  | 0.537662 | C | 1 |
| 18 | 0.655232 | C | 1 |
| 18 | 0.655232 | C | 1 |
| 18 | 0.655232 | C | 1 |
| 16 | 0.680101 | C | 1 |
| 20 | 0.157136 | C | 1 |
| 16 | 0.680101 | C | 1 |
| 16 | 0.680101 | C | 1 |
| 6  | 0.537662 | C | 1 |
| 18 | 0.655232 | C | 1 |
| 20 | 0.157136 | C | 1 |
| 18 | 0.655232 | C | 1 |

|               |   |
|---------------|---|
| 18 0.655232 C | 1 |
| 18 0.655232 C | 1 |
| 18 0.655232 C | 1 |
| 18 0.655232 C | 1 |
| 18 0.655232 C | 1 |
| 18 0.655232 C | 1 |
| 18 0.655232 C | 1 |
| 16 0.680101 C | 1 |
| 18 0.655232 C | 1 |
| 20 0.157136 C | 1 |
| 6 0.537662 C  | 1 |
| 18 0.655232 C | 1 |
| 18 0.655232 C | 1 |
| 18 0.655232 C | 1 |
| 18 0.655232 C | 1 |
| 20 0.157136 C | 1 |
| 20 0.157136 C | 1 |
| 20 0.157136 C | 1 |
| 18 0.655232 C | 1 |
| 18 0.655232 C | 1 |
| 18 0.655232 C | 1 |
| 6 0.537662 C  | 1 |
| 6 0.537662 C  | 1 |
| 20 0.319639 C | 1 |
| 20 0.319639 C | 1 |
| 10 0.427817 C | 1 |
| 20 0.319639 C | 1 |
| 5 0.647774 C  | 1 |
| 2 0.33355 C   | 1 |
| 10 0.427817 C | 1 |
| 22 0.372975 C | 1 |
| 10 0.427817 C | 1 |
| 6 0.375132 L  | 0 |
| 10 0.427817 C | 1 |
| 6 0.375132 L  | 0 |
| 5 0.647774 C  | 1 |
| 10 0.427817 C | 1 |
| 22 0.372975 C | 1 |
| 5 0.647774 C  | 1 |
| 20 0.319639 C | 1 |
| 2 0.33355 C   | 1 |
| 2 0.33355 C   | 1 |
| 20 0.319639 C | 1 |
| 20 0.319639 C | 1 |
| 6 0.375132 L  | 0 |
| 6 0.375132 L  | 0 |
| 20 0.319639 C | 1 |
| 20 0.319639 C | 1 |
| 20 0.319639 C | 1 |
| 20 0.319639 C | 1 |
| 6 0.375132 L  | 0 |
| 6 0.375132 L  | 0 |
| 6 0.375132 L  | 0 |
| 5 0.647774 C  | 1 |

|    |          |   |   |
|----|----------|---|---|
| 22 | 0.372975 | C | 1 |
| 22 | 0.372975 | C | 1 |
| 10 | 0.427817 | C | 1 |
| 22 | 0.372975 | C | 1 |
| 10 | 0.427817 | C | 1 |
| 20 | 0.319639 | C | 1 |
| 20 | 0.319639 | C | 1 |
| 20 | 0.319639 | C | 1 |
| 6  | 0.375132 | L | 0 |
| 20 | 0.319639 | C | 1 |
| 5  | 0.647774 | C | 1 |
| 5  | 0.704284 | C | 1 |
| 8  | 0.287577 | C | 1 |
| 8  | 0.287577 | C | 1 |
| 8  | 0.287577 | C | 1 |
| 15 | 0.236639 | C | 1 |
| 15 | 0.236639 | C | 1 |
| 15 | 0.236639 | C | 1 |
| 15 | 0.236639 | C | 1 |
| 15 | 0.236639 | C | 1 |
| 5  | 0.704284 | C | 1 |
| 5  | 0.704284 | C | 1 |
| 8  | 0.287577 | C | 1 |
| 15 | 0.236639 | C | 1 |
| 5  | 0.704284 | C | 1 |
| 5  | 0.704284 | C | 1 |
| 15 | 0.236639 | C | 1 |
| 15 | 0.236639 | C | 1 |
| 8  | 0.287577 | C | 1 |
| 5  | 0.704284 | C | 1 |
| 8  | 0.287577 | C | 1 |
| 5  | 0.704284 | C | 1 |
| 5  | 0.704284 | C | 1 |
| 8  | 0.287577 | C | 1 |
| 6  | 0.139709 | C | 1 |
| 6  | 0.139709 | C | 1 |
| 10 | 0.138774 | C | 1 |
| 22 | 0.486747 | S | 0 |
| 8  | 0.46355  | G | 0 |
| 5  | 0.445098 | C | 1 |
| 6  | 0.818564 | C | 1 |
| 6  | 0.367903 | C | 1 |
| 6  | 0.476965 | C | 1 |
| 5  | 0.489065 | M | 0 |
| 6  | 0.114523 | C | 1 |
| 4  | 0.241179 | I | 0 |
| 6  | 0.553161 | C | 1 |
| 6  | 0.44468  | C | 1 |
| 5  | 0.34152  | C | 1 |
| 22 | 0.486747 | S | 0 |
| 6  | 0.476965 | C | 1 |
| 1  | 0.214322 | C | 1 |
| 1  | 0.647133 | E | 1 |
| 19 | 0.310614 | C | 1 |

|    |          |   |   |
|----|----------|---|---|
| 6  | 0.139709 | C | 1 |
| 6  | 0.476965 | C | 1 |
| 2  | 0.382671 | M | 0 |
| 6  | 0.114523 | C | 1 |
| 6  | 0.324042 | C | 1 |
| 13 | 0.656001 | C | 1 |
| 8  | 0.339084 | C | 1 |
| 2  | 0.712472 | C | 1 |
| 5  | 0.227195 | C | 1 |
| 1  | 0.072193 | C | 1 |
| 6  | 0.248776 | C | 1 |
| 5  | 0.83648  | M | 0 |
| 6  | 0.250558 | C | 1 |
| 1  | 0.415907 | C | 1 |
| 2  | 0.134659 | C | 1 |
| 6  | 0.818564 | C | 1 |
| 6  | 0.818564 | C | 1 |
| 8  | 0.46355  | G | 0 |
| 9  | 0.675708 | C | 1 |
| 5  | 0.54466  | C | 1 |
| 2  | 0.198674 | C | 1 |
| 17 | 0.433458 | S | 0 |
| 10 | 0.63653  | F | 0 |
| 5  | 0.445098 | C | 1 |
| 6  | 0.818564 | C | 1 |
| 6  | 0.433496 | C | 1 |
| 6  | 0.476965 | C | 1 |
| 19 | 0.310614 | C | 1 |
| 13 | 0.656001 | C | 1 |
| 6  | 0.409561 | C | 1 |
| 6  | 0.433496 | C | 1 |
| 6  | 0.412607 | C | 1 |
| 7  | 0.383229 | C | 1 |
| 10 | 0.62116  | C | 1 |
| 7  | 0.324208 | G | 0 |
| 6  | 0.476965 | C | 1 |
| 10 | 0.62116  | C | 1 |
| 7  | 0.764072 | C | 1 |
| 6  | 0.324042 | C | 1 |
| 1  | 0.309924 | C | 1 |
| 6  | 0.248776 | C | 1 |
| 6  | 0.324042 | C | 1 |
| 7  | 0.383229 | C | 1 |
| 7  | 0.764072 | C | 1 |
| 6  | 0.324042 | C | 1 |
| 5  | 0.267474 | C | 1 |
| 6  | 0.44468  | C | 1 |
| 6  | 0.409561 | C | 1 |
| 19 | 0.310614 | C | 1 |
| 5  | 0.83648  | M | 0 |
| 1  | 0.259525 | C | 1 |
| 1  | 0.415907 | C | 1 |
| 5  | 0.227195 | C | 1 |
| 6  | 0.285985 | D | 1 |

|    |          |   |   |
|----|----------|---|---|
| 6  | 0.324042 | C | 1 |
| 1  | 0.072193 | C | 1 |
| 19 | 0.310614 | C | 1 |
| 5  | 0.201834 | C | 1 |
| 7  | 0.324208 | G | 0 |
| 6  | 0.324042 | C | 1 |
| 9  | 0.215407 | C | 1 |
| 9  | 0.44153  | C | 1 |
| 1  | 0.259525 | C | 1 |
| 2  | 0.134169 | C | 1 |
| 6  | 0.476965 | C | 1 |
| 5  | 0.83648  | M | 0 |
| 6  | 0.818564 | C | 1 |
| 5  | 0.83648  | M | 0 |
| 7  | 0.764072 | C | 1 |
| 6  | 0.818564 | C | 1 |
| 6  | 0.412607 | C | 1 |
| 9  | 0.44153  | C | 1 |
| 10 | 0.621891 | E | 1 |
| 10 | 0.138774 | C | 1 |
| 8  | 0.339084 | C | 1 |
| 6  | 0.139709 | C | 1 |
| 10 | 0.62116  | C | 1 |
| 10 | 0.63653  | F | 0 |
| 6  | 0.250558 | C | 1 |
| 4  | 0.624865 | C | 1 |
| 5  | 0.590877 | C | 1 |
| 8  | 0.46355  | G | 0 |
| 13 | 0.656001 | C | 1 |
| 7  | 0.324208 | G | 0 |
| 8  | 0.46355  | G | 0 |
| 5  | 0.445098 | C | 1 |
| 5  | 0.227195 | C | 1 |
| 2  | 0.198674 | C | 1 |
| 7  | 0.324208 | G | 0 |
| 7  | 0.764072 | C | 1 |
| 6  | 0.818564 | C | 1 |
| 6  | 0.367903 | C | 1 |
| 6  | 0.553161 | C | 1 |
| 5  | 0.83648  | M | 0 |
| 5  | 0.227195 | C | 1 |
| 10 | 0.63653  | F | 0 |
| 1  | 0.309924 | C | 1 |
| 6  | 0.412607 | C | 1 |
| 4  | 0.266981 | C | 1 |
| 6  | 0.818564 | C | 1 |
| 5  | 0.54466  | C | 1 |
| 2  | 0.712472 | C | 1 |
| 6  | 0.476965 | C | 1 |
| 5  | 0.227195 | C | 1 |
| 6  | 0.409561 | C | 1 |
| 10 | 0.63653  | F | 0 |
| 2  | 0.375285 | C | 1 |
| 6  | 0.818564 | C | 1 |

|    |          |   |   |
|----|----------|---|---|
| 6  | 0.44468  | C | 1 |
| 6  | 0.44468  | C | 1 |
| 6  | 0.250558 | C | 1 |
| 5  | 0.227195 | C | 1 |
| 2  | 0.382671 | M | 0 |
| 10 | 0.138774 | C | 1 |
| 5  | 0.445098 | C | 1 |
| 1  | 0.259525 | C | 1 |
| 13 | 0.656001 | C | 1 |
| 19 | 0.310614 | C | 1 |
| 6  | 0.553161 | C | 1 |
| 5  | 0.83648  | M | 0 |
| 6  | 0.818564 | C | 1 |
| 6  | 0.476965 | C | 1 |
| 13 | 0.656001 | C | 1 |
| 6  | 0.285985 | D | 1 |
| 19 | 0.310614 | C | 1 |
| 5  | 0.267474 | C | 1 |
| 5  | 0.489065 | M | 0 |
| 4  | 0.068284 | C | 1 |
| 6  | 0.409561 | C | 1 |
| 22 | 0.486747 | S | 0 |
| 22 | 0.486747 | S | 0 |
| 13 | 0.656001 | C | 1 |
| 6  | 0.553161 | C | 1 |
| 4  | 0.241179 | I | 0 |
| 13 | 0.656001 | C | 1 |
| 7  | 0.764072 | C | 1 |
| 13 | 0.656001 | C | 1 |
| 7  | 0.764072 | C | 1 |
| 8  | 0.339084 | C | 1 |
| 5  | 0.590877 | C | 1 |
| 19 | 0.310614 | C | 1 |
| 5  | 0.445098 | C | 1 |
| 5  | 0.445098 | C | 1 |
| 6  | 0.415655 | C | 1 |
| 13 | 0.656001 | C | 1 |
| 4  | 0.241179 | I | 0 |
| 6  | 0.250558 | C | 1 |
| 10 | 0.63653  | F | 0 |
| 6  | 0.324042 | C | 1 |
| 10 | 0.384815 | C | 1 |
| 7  | 0.764072 | C | 1 |
| 2  | 0.712472 | C | 1 |
| 1  | 0.259525 | C | 1 |
| 6  | 0.324042 | C | 1 |
| 1  | 0.214322 | C | 1 |
| 6  | 0.367903 | C | 1 |
| 7  | 0.764072 | C | 1 |
| 19 | 0.330283 | C | 1 |
| 1  | 0.647133 | E | 1 |
| 5  | 0.83648  | M | 0 |
| 5  | 0.144293 | C | 1 |
| 9  | 0.215407 | C | 1 |



|    |          |   |   |
|----|----------|---|---|
| 1  | 0.309924 | C | 1 |
| 6  | 0.415655 | C | 1 |
| 8  | 0.46355  | G | 0 |
| 6  | 0.409561 | C | 1 |
| 5  | 0.83648  | M | 0 |
| 2  | 0.198674 | C | 1 |
| 6  | 0.114523 | C | 1 |
| 9  | 0.215407 | C | 1 |
| 6  | 0.553161 | C | 1 |
| 6  | 0.324042 | C | 1 |
| 6  | 0.391624 | C | 1 |
| 4  | 0.533158 | C | 1 |
| 6  | 0.409561 | C | 1 |
| 7  | 0.764072 | C | 1 |
| 9  | 0.44153  | C | 1 |
| 5  | 0.201834 | C | 1 |
| 1  | 0.214322 | C | 1 |
| 5  | 0.227195 | C | 1 |
| 1  | 0.309924 | C | 1 |
| 6  | 0.476965 | C | 1 |
| 6  | 0.476965 | C | 1 |
| 6  | 0.415655 | C | 1 |
| 5  | 0.267474 | C | 1 |
| 19 | 0.330283 | C | 1 |
| 5  | 0.227195 | C | 1 |
| 10 | 0.384815 | C | 1 |
| 9  | 0.215407 | C | 1 |
| 5  | 0.590877 | C | 1 |
| 5  | 0.590877 | C | 1 |
| 6  | 0.250558 | C | 1 |
| 6  | 0.415655 | C | 1 |
| 10 | 0.138774 | C | 1 |
| 7  | 0.764072 | C | 1 |
| 5  | 0.590877 | C | 1 |
| 13 | 0.656001 | C | 1 |
| 10 | 0.63653  | F | 0 |
| 6  | 0.433496 | C | 1 |
| 13 | 0.656001 | C | 1 |
| 4  | 0.533158 | C | 1 |
| 10 | 0.384815 | C | 1 |
| 5  | 0.267474 | C | 1 |
| 2  | 0.712472 | C | 1 |
| 10 | 0.621891 | E | 1 |
| 2  | 0.134659 | C | 1 |
| 10 | 0.138774 | C | 1 |
| 10 | 0.62116  | C | 1 |
| 6  | 0.476965 | C | 1 |
| 5  | 0.590877 | C | 1 |
| 2  | 0.382671 | M | 0 |
| 5  | 0.54466  | C | 1 |
| 5  | 0.267474 | C | 1 |
| 9  | 0.675708 | C | 1 |
| 9  | 0.215407 | C | 1 |
| 6  | 0.409561 | C | 1 |

|    |          |   |   |
|----|----------|---|---|
| 10 | 0.384815 | C | 1 |
| 6  | 0.324042 | C | 1 |
| 6  | 0.248776 | C | 1 |
| 6  | 0.433496 | C | 1 |
| 5  | 0.54466  | C | 1 |
| 10 | 0.384815 | C | 1 |
| 7  | 0.764072 | C | 1 |
| 17 | 0.433458 | S | 0 |
| 1  | 0.415907 | C | 1 |
| 6  | 0.324042 | C | 1 |
| 13 | 0.656001 | C | 1 |
| 5  | 0.34152  | C | 1 |
| 5  | 0.54466  | C | 1 |
| 6  | 0.433496 | C | 1 |
| 1  | 0.415907 | C | 1 |
| 6  | 0.285985 | D | 1 |
| 2  | 0.198674 | C | 1 |
| 6  | 0.409561 | C | 1 |
| 5  | 0.54466  | C | 1 |
| 22 | 0.486747 | S | 0 |
| 5  | 0.227195 | C | 1 |
| 6  | 0.415655 | C | 1 |
| 4  | 0.266981 | C | 1 |
| 5  | 0.227195 | C | 1 |
| 6  | 0.391624 | C | 1 |
| 6  | 0.415655 | C | 1 |
| 6  | 0.367903 | C | 1 |
| 1  | 0.072193 | C | 1 |
| 2  | 0.134659 | C | 1 |
| 6  | 0.114523 | C | 1 |
| 7  | 0.764072 | C | 1 |
| 6  | 0.415655 | C | 1 |
| 8  | 0.46355  | G | 0 |
| 6  | 0.415655 | C | 1 |
| 2  | 0.198674 | C | 1 |
| 10 | 0.621891 | E | 1 |
| 1  | 0.259525 | C | 1 |
| 1  | 0.647133 | E | 1 |
| 6  | 0.409561 | C | 1 |
| 6  | 0.415655 | C | 1 |
| 4  | 0.266981 | C | 1 |
| 8  | 0.339084 | C | 1 |
| 6  | 0.415655 | C | 1 |
| 1  | 0.214322 | C | 1 |
| 4  | 0.160225 | C | 1 |
| 5  | 0.201834 | C | 1 |
| 10 | 0.621891 | E | 1 |
| 4  | 0.266981 | C | 1 |
| 13 | 0.656001 | C | 1 |
| 5  | 0.445098 | C | 1 |
| 5  | 0.54466  | C | 1 |
| 4  | 0.624865 | C | 1 |
| 5  | 0.34152  | C | 1 |
| 5  | 0.445098 | C | 1 |

|    |          |   |   |
|----|----------|---|---|
| 8  | 0.339084 | C | 1 |
| 6  | 0.391624 | C | 1 |
| 6  | 0.433496 | C | 1 |
| 6  | 0.412607 | C | 1 |
| 19 | 0.330283 | C | 1 |
| 6  | 0.412607 | C | 1 |
| 19 | 0.330283 | C | 1 |
| 6  | 0.285985 | D | 1 |
| 6  | 0.412607 | C | 1 |
| 5  | 0.201834 | C | 1 |
| 6  | 0.553161 | C | 1 |
| 7  | 0.324208 | G | 0 |
| 7  | 0.324208 | G | 0 |
| 5  | 0.83648  | M | 0 |
| 6  | 0.391624 | C | 1 |
| 6  | 0.139709 | C | 1 |
| 4  | 0.624865 | C | 1 |
| 10 | 0.62116  | C | 1 |
| 6  | 0.476965 | C | 1 |
| 4  | 0.624865 | C | 1 |
| 13 | 0.656001 | C | 1 |
| 1  | 0.309924 | C | 1 |
| 2  | 0.375285 | C | 1 |
| 8  | 0.46355  | G | 0 |
| 6  | 0.250558 | C | 1 |
| 6  | 0.553161 | C | 1 |
| 8  | 0.339084 | C | 1 |
| 5  | 0.590877 | C | 1 |
| 22 | 0.486747 | S | 0 |
| 5  | 0.590877 | C | 1 |
| 7  | 0.764072 | C | 1 |
| 6  | 0.391624 | C | 1 |
| 19 | 0.310614 | C | 1 |
| 22 | 0.486747 | S | 0 |
| 7  | 0.764072 | C | 1 |
| 22 | 0.486747 | S | 0 |
| 6  | 0.391624 | C | 1 |
| 9  | 0.215407 | C | 1 |
| 10 | 0.138774 | C | 1 |
| 6  | 0.553161 | C | 1 |
| 2  | 0.134169 | C | 1 |
| 7  | 0.324208 | G | 0 |
| 4  | 0.266981 | C | 1 |
| 6  | 0.409561 | C | 1 |
| 5  | 0.384125 | C | 1 |
| 7  | 0.764072 | C | 1 |
| 5  | 0.445098 | C | 1 |
| 5  | 0.34152  | C | 1 |
| 5  | 0.384125 | C | 1 |
| 13 | 0.656001 | C | 1 |
| 17 | 0.433458 | S | 0 |
| 10 | 0.62116  | C | 1 |
| 4  | 0.533158 | C | 1 |
| 10 | 0.62116  | C | 1 |

|    |          |   |   |
|----|----------|---|---|
| 13 | 0.656001 | C | 1 |
| 2  | 0.134169 | C | 1 |
| 6  | 0.114523 | C | 1 |
| 7  | 0.324208 | G | 0 |
| 2  | 0.198674 | C | 1 |
| 1  | 0.647133 | E | 1 |
| 22 | 0.486747 | S | 0 |
| 13 | 0.656001 | C | 1 |
| 5  | 0.489065 | M | 0 |
| 10 | 0.621891 | E | 1 |
| 10 | 0.621891 | E | 1 |
| 5  | 0.267474 | C | 1 |
| 10 | 0.138774 | C | 1 |
| 8  | 0.46355  | G | 0 |
| 5  | 0.227195 | C | 1 |
| 2  | 0.712472 | C | 1 |
| 13 | 0.656001 | C | 1 |
| 5  | 0.34152  | C | 1 |
| 7  | 0.324208 | G | 0 |
| 4  | 0.068284 | C | 1 |
| 7  | 0.764072 | C | 1 |
| 22 | 0.486747 | S | 0 |
| 6  | 0.391624 | C | 1 |
| 6  | 0.409561 | C | 1 |
| 4  | 0.068284 | C | 1 |
| 6  | 0.415655 | C | 1 |
| 7  | 0.383229 | C | 1 |
| 4  | 0.160225 | C | 1 |
| 7  | 0.324208 | G | 0 |
| 5  | 0.54466  | C | 1 |
| 6  | 0.553161 | C | 1 |
| 5  | 0.54466  | C | 1 |
| 6  | 0.250558 | C | 1 |
| 6  | 0.412607 | C | 1 |
| 8  | 0.46355  | G | 0 |
| 6  | 0.250558 | C | 1 |
| 7  | 0.383229 | C | 1 |
| 13 | 0.656001 | C | 1 |
| 10 | 0.63653  | F | 0 |
| 6  | 0.285985 | D | 1 |
| 6  | 0.285985 | D | 1 |
| 10 | 0.138774 | C | 1 |
| 13 | 0.656001 | C | 1 |
| 6  | 0.433496 | C | 1 |
| 9  | 0.235742 | L | 0 |
| 6  | 0.412607 | C | 1 |
| 13 | 0.656001 | C | 1 |
| 6  | 0.367903 | C | 1 |
| 2  | 0.134169 | C | 1 |
| 5  | 0.54466  | C | 1 |
| 1  | 0.309924 | C | 1 |
| 6  | 0.250558 | C | 1 |
| 5  | 0.201834 | C | 1 |
| 1  | 0.309924 | C | 1 |

|    |          |   |   |
|----|----------|---|---|
| 2  | 0.375285 | C | 1 |
| 4  | 0.068284 | C | 1 |
| 13 | 0.656001 | C | 1 |
| 2  | 0.134169 | C | 1 |
| 8  | 0.46355  | G | 0 |
| 1  | 0.214322 | C | 1 |
| 19 | 0.310614 | C | 1 |
| 5  | 0.34152  | C | 1 |
| 5  | 0.489065 | M | 0 |
| 6  | 0.248776 | C | 1 |
| 5  | 0.384125 | C | 1 |
| 8  | 0.46355  | G | 0 |
| 6  | 0.433496 | C | 1 |
| 4  | 0.068284 | C | 1 |
| 1  | 0.214322 | C | 1 |
| 4  | 0.624865 | C | 1 |
| 10 | 0.621891 | E | 1 |
| 6  | 0.818564 | C | 1 |
| 9  | 0.44153  | C | 1 |
| 13 | 0.656001 | C | 1 |
| 6  | 0.248776 | C | 1 |
| 6  | 0.409561 | C | 1 |
| 7  | 0.324208 | G | 0 |
| 22 | 0.486747 | S | 0 |
| 5  | 0.590877 | C | 1 |
| 10 | 0.63653  | F | 0 |
| 5  | 0.590877 | C | 1 |
| 5  | 0.54466  | C | 1 |
| 8  | 0.339084 | C | 1 |
| 10 | 0.62116  | C | 1 |
| 9  | 0.44153  | C | 1 |
| 4  | 0.068284 | C | 1 |
| 1  | 0.259525 | C | 1 |
| 1  | 0.415907 | C | 1 |
| 6  | 0.433496 | C | 1 |
| 7  | 0.324208 | G | 0 |
| 2  | 0.134169 | C | 1 |
| 7  | 0.383229 | C | 1 |
| 4  | 0.533158 | C | 1 |
| 5  | 0.34152  | C | 1 |
| 6  | 0.553161 | C | 1 |
| 6  | 0.553161 | C | 1 |
| 5  | 0.590877 | C | 1 |
| 6  | 0.553161 | C | 1 |
| 22 | 0.486747 | S | 0 |
| 4  | 0.241179 | I | 0 |
| 1  | 0.647133 | E | 1 |
| 19 | 0.330283 | C | 1 |
| 6  | 0.367903 | C | 1 |
| 8  | 0.339084 | C | 1 |
| 4  | 0.241179 | I | 0 |
| 19 | 0.310614 | C | 1 |
| 17 | 0.433458 | S | 0 |
| 6  | 0.44468  | C | 1 |

|    |          |   |   |
|----|----------|---|---|
| 6  | 0.248776 | C | 1 |
| 2  | 0.375285 | C | 1 |
| 10 | 0.138774 | C | 1 |
| 5  | 0.227195 | C | 1 |
| 2  | 0.198674 | C | 1 |
| 9  | 0.44153  | C | 1 |
| 5  | 0.83648  | M | 0 |
| 9  | 0.235742 | L | 0 |
| 5  | 0.83648  | M | 0 |
| 6  | 0.391624 | C | 1 |
| 19 | 0.310614 | C | 1 |
| 5  | 0.201834 | C | 1 |
| 4  | 0.241179 | I | 0 |
| 1  | 0.072193 | C | 1 |
| 5  | 0.201834 | C | 1 |
| 4  | 0.160225 | C | 1 |
| 22 | 0.486747 | S | 0 |
| 9  | 0.44153  | C | 1 |
| 19 | 0.330283 | C | 1 |
| 9  | 0.675708 | C | 1 |
| 7  | 0.324208 | G | 0 |
| 6  | 0.818564 | C | 1 |
| 8  | 0.46355  | G | 0 |
| 10 | 0.621891 | E | 1 |
| 2  | 0.382671 | M | 0 |
| 2  | 0.375285 | C | 1 |
| 1  | 0.309924 | C | 1 |
| 1  | 0.309924 | C | 1 |
| 4  | 0.068284 | C | 1 |
| 8  | 0.339084 | C | 1 |
| 13 | 0.656001 | C | 1 |
| 17 | 0.433458 | S | 0 |
| 2  | 0.375285 | C | 1 |
| 17 | 0.433458 | S | 0 |
| 4  | 0.266981 | C | 1 |
| 1  | 0.415907 | C | 1 |
| 10 | 0.138774 | C | 1 |
| 2  | 0.382671 | M | 0 |
| 13 | 0.656001 | C | 1 |
| 6  | 0.433496 | C | 1 |
| 4  | 0.160225 | C | 1 |
| 5  | 0.54466  | C | 1 |
| 10 | 0.63653  | F | 0 |
| 4  | 0.241179 | I | 0 |
| 1  | 0.415907 | C | 1 |
| 9  | 0.235742 | L | 0 |
| 6  | 0.553161 | C | 1 |
| 9  | 0.235742 | L | 0 |
| 13 | 0.656001 | C | 1 |
| 10 | 0.138774 | C | 1 |
| 17 | 0.433458 | S | 0 |
| 1  | 0.214322 | C | 1 |
| 5  | 0.144293 | C | 1 |
| 4  | 0.241179 | I | 0 |

|    |          |   |   |
|----|----------|---|---|
| 5  | 0.590877 | C | 1 |
| 22 | 0.486747 | S | 0 |
| 6  | 0.476965 | C | 1 |
| 2  | 0.198674 | C | 1 |
| 1  | 0.214322 | C | 1 |
| 6  | 0.139709 | C | 1 |
| 5  | 0.267474 | C | 1 |
| 5  | 0.384125 | C | 1 |
| 10 | 0.62116  | C | 1 |
| 5  | 0.384125 | C | 1 |
| 1  | 0.415907 | C | 1 |
| 6  | 0.818564 | C | 1 |
| 5  | 0.489065 | M | 0 |
| 4  | 0.241179 | I | 0 |
| 6  | 0.324042 | C | 1 |
| 1  | 0.214322 | C | 1 |
| 4  | 0.266981 | C | 1 |
| 1  | 0.309924 | C | 1 |
| 9  | 0.215407 | C | 1 |
| 5  | 0.267474 | C | 1 |
| 6  | 0.553161 | C | 1 |
| 22 | 0.486747 | S | 0 |
| 5  | 0.489065 | M | 0 |
| 13 | 0.656001 | C | 1 |
| 6  | 0.415655 | C | 1 |
| 10 | 0.62116  | C | 1 |
| 9  | 0.44153  | C | 1 |
| 13 | 0.656001 | C | 1 |
| 2  | 0.712472 | C | 1 |
| 2  | 0.712472 | C | 1 |
| 5  | 0.267474 | C | 1 |
| 22 | 0.486747 | S | 0 |
| 6  | 0.324042 | C | 1 |
| 1  | 0.647133 | E | 1 |
| 7  | 0.383229 | C | 1 |
| 9  | 0.44153  | C | 1 |
| 8  | 0.339084 | C | 1 |
| 7  | 0.324208 | G | 0 |
| 13 | 0.656001 | C | 1 |
| 8  | 0.46355  | G | 0 |
| 9  | 0.235742 | L | 0 |
| 1  | 0.072193 | C | 1 |
| 5  | 0.144293 | C | 1 |
| 4  | 0.533158 | C | 1 |
| 10 | 0.63653  | F | 0 |
| 4  | 0.241179 | I | 0 |
| 8  | 0.339084 | C | 1 |
| 13 | 0.656001 | C | 1 |
| 4  | 0.160225 | C | 1 |
| 10 | 0.621891 | E | 1 |
| 20 | 0.26409  | C | 1 |
| 20 | 0.26409  | C | 1 |
| 20 | 0.26409  | C | 1 |
| 20 | 0.26409  | C | 1 |

|    |          |   |   |
|----|----------|---|---|
| 20 | 0.26409  | C | 1 |
| 20 | 0.26409  | C | 1 |
| 2  | 0.211318 | C | 1 |
| 16 | 0.758494 | C | 1 |
| 15 | 0.260667 | C | 1 |
| 20 | 0.260356 | C | 1 |
| 15 | 0.260667 | C | 1 |
| 15 | 0.260667 | C | 1 |
| 2  | 0.211318 | C | 1 |
| 16 | 0.758494 | C | 1 |
| 15 | 0.260667 | C | 1 |
| 20 | 0.260356 | C | 1 |
| 15 | 0.260667 | C | 1 |
| 20 | 0.260356 | C | 1 |
| 2  | 0.211318 | C | 1 |
| 16 | 0.758494 | C | 1 |
| 2  | 0.211318 | C | 1 |
| 20 | 0.260356 | C | 1 |
| 15 | 0.260667 | C | 1 |
| 20 | 0.114798 | C | 1 |
| 20 | 0.114798 | C | 1 |
| 20 | 0.114798 | C | 1 |
| 23 | 0.328263 | C | 1 |
| 20 | 0.260356 | C | 1 |
| 20 | 0.260356 | C | 1 |
| 20 | 0.260356 | C | 1 |
| 20 | 0.260356 | C | 1 |
| 16 | 0.758494 | C | 1 |
| 15 | 0.260667 | C | 1 |
| 20 | 0.260356 | C | 1 |
| 15 | 0.260667 | C | 1 |
| 16 | 0.758494 | C | 1 |
| 15 | 0.260667 | C | 1 |
| 23 | 0.328263 | C | 1 |
| 2  | 0.211318 | C | 1 |
| 16 | 0.758494 | C | 1 |
| 16 | 0.758494 | C | 1 |
| 16 | 0.758494 | C | 1 |
| 20 | 0.260356 | C | 1 |
| 20 | 0.260356 | C | 1 |
| 16 | 0.758494 | C | 1 |
| 16 | 0.758494 | C | 1 |
| 20 | 0.114798 | C | 1 |
| 19 | 0.301028 | C | 1 |
| 19 | 0.301028 | C | 1 |
| 23 | 0.328263 | C | 1 |
| 19 | 0.301028 | C | 1 |
| 20 | 0.260356 | C | 1 |
| 2  | 0.211318 | C | 1 |
| 15 | 0.260667 | C | 1 |
| 20 | 0.260356 | C | 1 |
| 1  | 0.178365 | C | 1 |
| 1  | 0.178365 | C | 1 |
| 20 | 0.826959 | G | 0 |



|    |          |   |   |
|----|----------|---|---|
| 18 | 0.366865 | C | 1 |
| 1  | 0.178365 | C | 1 |
| 17 | 0.323197 | C | 1 |
| 1  | 0.178365 | C | 1 |
| 18 | 0.366865 | C | 1 |
| 20 | 0.826959 | G | 0 |
| 1  | 0.178365 | C | 1 |
| 1  | 0.178365 | C | 1 |
| 18 | 0.366865 | C | 1 |
| 17 | 0.323197 | C | 1 |
| 18 | 0.366865 | C | 1 |
| 20 | 0.826959 | G | 0 |
| 20 | 0.826959 | G | 0 |
| 20 | 0.826959 | G | 0 |
| 18 | 0.366865 | C | 1 |
| 1  | 0.178365 | C | 1 |
| 17 | 0.323197 | C | 1 |
| 18 | 0.366865 | C | 1 |
| 18 | 0.366865 | C | 1 |
| 17 | 0.323197 | C | 1 |
| 17 | 0.323197 | C | 1 |
| 17 | 0.323197 | C | 1 |
| 18 | 0.366865 | C | 1 |
| 18 | 0.366865 | C | 1 |
| 1  | 0.178365 | C | 1 |
| 20 | 0.826959 | G | 0 |
| 20 | 0.826959 | G | 0 |
| 19 | 0.129885 | C | 1 |
| 19 | 0.129885 | C | 1 |
| 19 | 0.129885 | C | 1 |
| 19 | 0.129885 | C | 1 |
| 19 | 0.129885 | C | 1 |
| 19 | 0.129885 | C | 1 |
| 19 | 0.483367 | C | 1 |
| 19 | 0.483367 | C | 1 |
| 19 | 0.483367 | C | 1 |
| 14 | 0.493218 | C | 1 |
| 13 | 0.754612 | E | 1 |
| 14 | 0.493218 | C | 1 |
| 12 | 0.569605 | C | 1 |
| 12 | 0.569605 | C | 1 |
| 17 | 0.686142 | C | 1 |
| 14 | 0.493218 | C | 1 |
| 12 | 0.569605 | C | 1 |
| 12 | 0.569605 | C | 1 |
| 12 | 0.569605 | C | 1 |
| 13 | 0.754612 | E | 1 |
| 14 | 0.493218 | C | 1 |
| 12 | 0.569605 | C | 1 |
| 14 | 0.493218 | C | 1 |
| 13 | 0.754612 | E | 1 |
| 14 | 0.493218 | C | 1 |
| 13 | 0.754612 | E | 1 |
| 12 | 0.569605 | C | 1 |

|    |          |   |   |
|----|----------|---|---|
| 13 | 0.754612 | E | 1 |
| 14 | 0.493218 | C | 1 |
| 17 | 0.686142 | C | 1 |
| 12 | 0.569605 | C | 1 |
| 14 | 0.493218 | C | 1 |
| 12 | 0.569605 | C | 1 |
| 12 | 0.569605 | C | 1 |
| 12 | 0.569605 | C | 1 |
| 13 | 0.754612 | E | 1 |
| 14 | 0.493218 | C | 1 |
| 12 | 0.569605 | C | 1 |
| 17 | 0.686142 | C | 1 |
| 14 | 0.493218 | C | 1 |
| 14 | 0.493218 | C | 1 |
| 17 | 0.686142 | C | 1 |
| 12 | 0.569605 | C | 1 |
| 12 | 0.569605 | C | 1 |
| 17 | 0.686142 | C | 1 |
| 17 | 0.686142 | C | 1 |
| 17 | 0.686142 | C | 1 |
| 12 | 0.569605 | C | 1 |
| 12 | 0.569605 | C | 1 |
| 17 | 0.686142 | C | 1 |
| 12 | 0.569605 | C | 1 |
| 13 | 0.754612 | E | 1 |
| 14 | 0.498418 | C | 1 |
| 14 | 0.498418 | C | 1 |
| 14 | 0.498418 | C | 1 |
| 10 | 0.657295 | E | 1 |
| 5  | 0.306406 | C | 1 |
| 5  | 0.306406 | C | 1 |
| 10 | 0.657295 | E | 1 |
| 18 | 0.119875 | C | 1 |
| 18 | 0.119875 | C | 1 |
| 10 | 0.657295 | E | 1 |
| 5  | 0.306406 | C | 1 |
| 18 | 0.119875 | C | 1 |
| 18 | 0.119875 | C | 1 |
| 18 | 0.119875 | C | 1 |
| 18 | 0.119875 | C | 1 |
| 18 | 0.119875 | C | 1 |
| 18 | 0.119875 | C | 1 |
| 5  | 0.306406 | C | 1 |
| 10 | 0.657295 | E | 1 |
| 5  | 0.306406 | C | 1 |
| 18 | 0.119875 | C | 1 |
| 5  | 0.306406 | C | 1 |
| 10 | 0.657295 | E | 1 |
| 18 | 0.119875 | C | 1 |
| 5  | 0.306406 | C | 1 |
| 18 | 0.119875 | C | 1 |
| 10 | 0.657295 | E | 1 |
| 18 | 0.119875 | C | 1 |
| 18 | 0.119875 | C | 1 |

|    |          |   |   |
|----|----------|---|---|
| 10 | 0.657295 | E | 1 |
| 18 | 0.119875 | C | 1 |
| 5  | 0.306406 | C | 1 |
| 18 | 0.119875 | C | 1 |
| 5  | 0.306406 | C | 1 |
| 10 | 0.657295 | E | 1 |
| 18 | 0.119875 | C | 1 |
| 12 | 0.740785 | S | 0 |
| 9  | 0.419957 | C | 1 |
| 12 | 0.421812 | C | 1 |
| 12 | 0.421812 | C | 1 |
| 6  | 0.568925 | C | 1 |
| 13 | 0.39091  | C | 1 |
| 20 | 0.617369 | C | 1 |
| 12 | 0.421812 | C | 1 |
| 6  | 0.551893 | C | 1 |
| 19 | 0.548585 | C | 1 |
| 20 | 0.617369 | C | 1 |
| 6  | 0.568925 | C | 1 |
| 12 | 0.740785 | S | 0 |
| 9  | 0.419957 | C | 1 |
| 4  | 0.473534 | C | 1 |
| 13 | 0.39091  | C | 1 |
| 20 | 0.617369 | C | 1 |
| 6  | 0.420089 | C | 1 |
| 18 | 0.368412 | C | 1 |
| 12 | 0.421812 | C | 1 |
| 18 | 0.368412 | C | 1 |
| 12 | 0.421812 | C | 1 |
| 6  | 0.568925 | C | 1 |
| 6  | 0.143736 | C | 1 |
| 2  | 0.258871 | C | 1 |
| 12 | 0.421812 | C | 1 |
| 6  | 0.624154 | C | 1 |
| 4  | 0.473534 | C | 1 |
| 13 | 0.39091  | C | 1 |
| 2  | 0.258871 | C | 1 |
| 6  | 0.420089 | C | 1 |
| 5  | 0.218481 | B | 1 |
| 13 | 0.39091  | C | 1 |
| 13 | 0.39091  | C | 1 |
| 16 | 0.645059 | E | 1 |
| 6  | 0.551893 | C | 1 |
| 6  | 0.420089 | C | 1 |
| 20 | 0.792135 | C | 1 |
| 5  | 0.218481 | B | 1 |
| 12 | 0.421812 | C | 1 |
| 13 | 0.39091  | C | 1 |
| 4  | 0.473534 | C | 1 |
| 18 | 0.368412 | C | 1 |
| 6  | 0.551893 | C | 1 |
| 6  | 0.568925 | C | 1 |
| 6  | 0.568925 | C | 1 |
| 12 | 0.421812 | C | 1 |

|    |          |   |   |
|----|----------|---|---|
| 6  | 0.420089 | C | 1 |
| 16 | 0.217548 | C | 1 |
| 16 | 0.217548 | C | 1 |
| 9  | 0.419957 | C | 1 |
| 5  | 0.218481 | B | 1 |
| 8  | 0.18133  | B | 1 |
| 12 | 0.421812 | C | 1 |
| 4  | 0.473534 | C | 1 |
| 12 | 0.421812 | C | 1 |
| 4  | 0.473534 | C | 1 |
| 6  | 0.420089 | C | 1 |
| 20 | 0.617369 | C | 1 |
| 6  | 0.420089 | C | 1 |
| 12 | 0.740785 | S | 0 |
| 8  | 0.18133  | B | 1 |
| 13 | 0.39091  | C | 1 |
| 6  | 0.551893 | C | 1 |
| 6  | 0.420089 | C | 1 |
| 16 | 0.645059 | E | 1 |
| 6  | 0.624154 | C | 1 |
| 13 | 0.39091  | C | 1 |
| 5  | 0.218481 | B | 1 |
| 12 | 0.421812 | C | 1 |
| 6  | 0.420089 | C | 1 |
| 19 | 0.548585 | C | 1 |
| 6  | 0.551893 | C | 1 |
| 8  | 0.471542 | D | 1 |
| 6  | 0.624154 | C | 1 |
| 6  | 0.551893 | C | 1 |
| 12 | 0.421812 | C | 1 |
| 6  | 0.568925 | C | 1 |
| 19 | 0.548585 | C | 1 |
| 6  | 0.420089 | C | 1 |
| 9  | 0.419957 | C | 1 |
| 6  | 0.420089 | C | 1 |
| 7  | 0.82568  | L | 0 |
| 16 | 0.217548 | C | 1 |
| 4  | 0.473534 | C | 1 |
| 19 | 0.548585 | C | 1 |
| 20 | 0.617369 | C | 1 |
| 9  | 0.419957 | C | 1 |
| 20 | 0.617369 | C | 1 |
| 4  | 0.473534 | C | 1 |
| 6  | 0.420089 | C | 1 |
| 16 | 0.217548 | C | 1 |
| 4  | 0.473534 | C | 1 |
| 20 | 0.617369 | C | 1 |
| 8  | 0.471542 | D | 1 |
| 20 | 0.792135 | C | 1 |
| 20 | 0.617369 | C | 1 |
| 6  | 0.568925 | C | 1 |
| 12 | 0.421812 | C | 1 |
| 6  | 0.143736 | C | 1 |
| 8  | 0.471542 | D | 1 |

|    |          |   |   |
|----|----------|---|---|
| 18 | 0.368412 | C | 1 |
| 20 | 0.617369 | C | 1 |
| 7  | 0.82568  | L | 0 |
| 5  | 0.218481 | B | 1 |
| 19 | 0.548585 | C | 1 |
| 20 | 0.792135 | C | 1 |
| 6  | 0.624154 | C | 1 |
| 20 | 0.617369 | C | 1 |
| 20 | 0.792135 | C | 1 |
| 8  | 0.471542 | D | 1 |
| 20 | 0.617369 | C | 1 |
| 4  | 0.473534 | C | 1 |
| 5  | 0.218481 | B | 1 |
| 5  | 0.218481 | B | 1 |
| 5  | 0.218481 | B | 1 |
| 4  | 0.473534 | C | 1 |
| 6  | 0.551893 | C | 1 |
| 6  | 0.624154 | C | 1 |
| 6  | 0.624154 | C | 1 |
| 20 | 0.617369 | C | 1 |
| 6  | 0.420089 | C | 1 |
| 2  | 0.258871 | C | 1 |
| 16 | 0.645059 | E | 1 |
| 19 | 0.256365 | C | 1 |
| 12 | 0.740785 | S | 0 |
| 4  | 0.473534 | C | 1 |
| 8  | 0.471542 | D | 1 |
| 9  | 0.419957 | C | 1 |
| 18 | 0.368412 | C | 1 |
| 12 | 0.421812 | C | 1 |
| 20 | 0.617369 | C | 1 |
| 20 | 0.617369 | C | 1 |
| 20 | 0.617369 | C | 1 |
| 6  | 0.624154 | C | 1 |
| 4  | 0.473534 | C | 1 |
| 20 | 0.617369 | C | 1 |
| 8  | 0.471542 | D | 1 |
| 12 | 0.421812 | C | 1 |
| 2  | 0.258871 | C | 1 |
| 6  | 0.420089 | C | 1 |
| 6  | 0.551893 | C | 1 |
| 13 | 0.39091  | C | 1 |
| 2  | 0.258871 | C | 1 |
| 12 | 0.421812 | C | 1 |
| 6  | 0.420089 | C | 1 |
| 6  | 0.568925 | C | 1 |
| 12 | 0.421812 | C | 1 |
| 16 | 0.217548 | C | 1 |
| 7  | 0.82568  | L | 0 |
| 9  | 0.419957 | C | 1 |
| 16 | 0.645059 | E | 1 |
| 20 | 0.617369 | C | 1 |
| 6  | 0.624154 | C | 1 |
| 2  | 0.258871 | C | 1 |



|    |          |   |   |
|----|----------|---|---|
| 6  | 0.392812 | C | 1 |
| 6  | 0.10995  | C | 1 |
| 18 | 0.444142 | C | 1 |
| 13 | 0.451476 | C | 1 |
| 6  | 0.392812 | C | 1 |
| 6  | 0.10995  | C | 1 |
| 19 | 0.472021 | C | 1 |
| 6  | 0.392812 | C | 1 |
| 18 | 0.444142 | C | 1 |
| 18 | 0.444142 | C | 1 |
| 19 | 0.472021 | C | 1 |
| 18 | 0.444142 | C | 1 |
| 6  | 0.10995  | C | 1 |
| 6  | 0.10995  | C | 1 |
| 13 | 0.451476 | C | 1 |
| 6  | 0.10995  | C | 1 |
| 6  | 0.392812 | C | 1 |
| 13 | 0.451476 | C | 1 |
| 18 | 0.444142 | C | 1 |
| 13 | 0.451476 | C | 1 |
| 18 | 0.230165 | C | 1 |
| 18 | 0.230165 | C | 1 |
| 18 | 0.230165 | C | 1 |
| 18 | 0.230165 | C | 1 |
| 18 | 0.230165 | C | 1 |
| 18 | 0.581809 | F | 0 |
| 20 | 0.656792 | C | 1 |
| 19 | 0.505207 | C | 1 |
| 15 | 0.384845 | C | 1 |
| 20 | 0.710387 | C | 1 |
| 17 | 0.4953   | C | 1 |
| 19 | 0.505207 | C | 1 |
| 18 | 0.581809 | F | 0 |
| 19 | 0.505207 | C | 1 |
| 12 | 0.356482 | C | 1 |
| 15 | 0.384845 | C | 1 |
| 19 | 0.505207 | C | 1 |
| 15 | 0.384845 | C | 1 |
| 15 | 0.384845 | C | 1 |
| 20 | 0.710387 | C | 1 |
| 19 | 0.505207 | C | 1 |
| 12 | 0.356482 | C | 1 |
| 20 | 0.710387 | C | 1 |
| 19 | 0.505207 | C | 1 |
| 18 | 0.581809 | F | 0 |
| 12 | 0.676997 | C | 1 |
| 18 | 0.581809 | F | 0 |
| 19 | 0.505207 | C | 1 |
| 19 | 0.505207 | C | 1 |
| 18 | 0.581809 | F | 0 |
| 12 | 0.356482 | C | 1 |
| 12 | 0.356482 | C | 1 |
| 15 | 0.384845 | C | 1 |
| 12 | 0.303638 | C | 1 |

|    |          |   |   |
|----|----------|---|---|
| 12 | 0.303638 | C | 1 |
| 12 | 0.303638 | C | 1 |
| 20 | 0.710387 | C | 1 |
| 12 | 0.676997 | C | 1 |
| 12 | 0.303638 | C | 1 |
| 4  | 0.128732 | I | 0 |
| 12 | 0.356482 | C | 1 |
| 19 | 0.505207 | C | 1 |
| 12 | 0.303638 | C | 1 |
| 20 | 0.710387 | C | 1 |
| 20 | 0.656792 | C | 1 |
| 19 | 0.505207 | C | 1 |
| 12 | 0.356482 | C | 1 |
| 17 | 0.4953   | C | 1 |
| 15 | 0.384845 | C | 1 |
| 18 | 0.581809 | F | 0 |
| 19 | 0.505207 | C | 1 |
| 20 | 0.710387 | C | 1 |
| 15 | 0.384845 | C | 1 |
| 18 | 0.581809 | F | 0 |
| 12 | 0.303638 | C | 1 |
| 12 | 0.303638 | C | 1 |
| 4  | 0.128732 | I | 0 |
| 15 | 0.384845 | C | 1 |
| 16 | 0.923242 | C | 1 |
| 19 | 0.505207 | C | 1 |
| 16 | 0.923242 | C | 1 |
| 16 | 0.923242 | C | 1 |
| 20 | 0.710387 | C | 1 |
| 15 | 0.384845 | C | 1 |
| 20 | 0.710387 | C | 1 |
| 15 | 0.384845 | C | 1 |
| 12 | 0.303638 | C | 1 |
| 15 | 0.384845 | C | 1 |
| 4  | 0.128732 | I | 0 |
| 20 | 0.710387 | C | 1 |
| 20 | 0.656792 | C | 1 |
| 12 | 0.676997 | C | 1 |
| 19 | 0.505207 | C | 1 |
| 12 | 0.356482 | C | 1 |
| 15 | 0.384845 | C | 1 |
| 4  | 0.128732 | I | 0 |
| 4  | 0.128732 | I | 0 |
| 17 | 0.4953   | C | 1 |
| 16 | 0.923242 | C | 1 |
| 12 | 0.303638 | C | 1 |
| 20 | 0.710387 | C | 1 |
| 20 | 0.710387 | C | 1 |
| 12 | 0.676997 | C | 1 |
| 20 | 0.710387 | C | 1 |
| 19 | 0.505207 | C | 1 |
| 12 | 0.676997 | C | 1 |
| 20 | 0.710387 | C | 1 |
| 16 | 0.923242 | C | 1 |



|    |          |   |   |
|----|----------|---|---|
| 12 | 0.303638 | C | 1 |
| 12 | 0.303638 | C | 1 |
| 17 | 0.4953   | C | 1 |
| 15 | 0.384845 | C | 1 |
| 16 | 0.923242 | C | 1 |
| 20 | 0.656792 | C | 1 |
| 4  | 0.128732 | I | 0 |
| 15 | 0.384845 | C | 1 |
| 17 | 0.4953   | C | 1 |
| 20 | 0.710387 | C | 1 |
| 20 | 0.710387 | C | 1 |
| 17 | 0.4953   | C | 1 |
| 19 | 0.505207 | C | 1 |
| 15 | 0.384845 | C | 1 |
| 19 | 0.505207 | C | 1 |
| 12 | 0.303638 | C | 1 |
| 15 | 0.384845 | C | 1 |
| 12 | 0.676997 | C | 1 |
| 20 | 0.656792 | C | 1 |
| 12 | 0.676997 | C | 1 |
| 19 | 0.505207 | C | 1 |
| 17 | 0.773331 | C | 1 |
| 19 | 0.778553 | F | 0 |
| 17 | 0.773331 | C | 1 |
| 19 | 0.778553 | F | 0 |
| 17 | 0.773331 | C | 1 |
| 6  | 0.410944 | C | 1 |
| 6  | 0.410944 | C | 1 |
| 6  | 0.410944 | C | 1 |
| 6  | 0.410944 | C | 1 |
| 6  | 0.410944 | C | 1 |
| 19 | 0.778553 | F | 0 |
| 17 | 0.773331 | C | 1 |
| 19 | 0.778553 | F | 0 |
| 6  | 0.410944 | C | 1 |
| 6  | 0.410944 | C | 1 |
| 17 | 0.773331 | C | 1 |
| 12 | 0.343576 | B | 1 |
| 12 | 0.343576 | B | 1 |
| 12 | 0.343576 | B | 1 |
| 12 | 0.343576 | B | 1 |
| 12 | 0.343576 | B | 1 |
| 6  | 0.622357 | C | 1 |
| 6  | 0.622357 | C | 1 |
| 6  | 0.622357 | C | 1 |
| 6  | 0.622357 | C | 1 |
| 6  | 0.622357 | C | 1 |
| 2  | 0.447386 | C | 1 |
| 6  | 0.462255 | C | 1 |
| 6  | 0.462255 | C | 1 |
| 6  | 0.462255 | C | 1 |
| 6  | 0.462255 | C | 1 |
| 2  | 0.447386 | C | 1 |

|    |          |   |   |
|----|----------|---|---|
| 6  | 0.462255 | C | 1 |
| 2  | 0.447386 | C | 1 |
| 6  | 0.462255 | C | 1 |
| 2  | 0.447386 | C | 1 |
| 6  | 0.462255 | C | 1 |
| 6  | 0.462255 | C | 1 |
| 6  | 0.462255 | C | 1 |
| 2  | 0.447386 | C | 1 |
| 2  | 0.447386 | C | 1 |
| 6  | 0.462255 | C | 1 |
| 14 | 0.350768 | C | 1 |
| 1  | 0.149477 | C | 1 |
| 14 | 0.350768 | C | 1 |
| 18 | 0.068284 | C | 1 |
| 18 | 0.068284 | C | 1 |
| 19 | 0.923242 | C | 1 |
| 14 | 0.350768 | C | 1 |
| 1  | 0.149477 | C | 1 |
| 18 | 0.068284 | C | 1 |
| 14 | 0.350768 | C | 1 |
| 14 | 0.350768 | C | 1 |
| 19 | 0.923242 | C | 1 |
| 19 | 0.923242 | C | 1 |
| 14 | 0.350768 | C | 1 |
| 18 | 0.068284 | C | 1 |
| 19 | 0.923242 | C | 1 |
| 14 | 0.350768 | C | 1 |
| 19 | 0.923242 | C | 1 |
| 18 | 0.068284 | C | 1 |
| 14 | 0.350768 | C | 1 |
| 19 | 0.923242 | C | 1 |
| 19 | 0.923242 | C | 1 |
| 18 | 0.068284 | C | 1 |
| 14 | 0.350768 | C | 1 |
| 19 | 0.923242 | C | 1 |
| 1  | 0.149477 | C | 1 |
| 14 | 0.350768 | C | 1 |
| 2  | 0.068284 | C | 1 |
| 2  | 0.068284 | C | 1 |
| 4  | 0.275464 | C | 1 |
| 2  | 0.068284 | C | 1 |
| 14 | 0.322252 | C | 1 |
| 14 | 0.322252 | C | 1 |
| 16 | 0.101581 | C | 1 |
| 4  | 0.275464 | C | 1 |
| 4  | 0.275464 | C | 1 |
| 4  | 0.275464 | C | 1 |
| 14 | 0.322252 | C | 1 |
| 4  | 0.275464 | C | 1 |
| 14 | 0.322252 | C | 1 |
| 2  | 0.068284 | C | 1 |
| 2  | 0.068284 | C | 1 |
| 16 | 0.101581 | C | 1 |
| 4  | 0.275464 | C | 1 |

|    |          |   |   |
|----|----------|---|---|
| 4  | 0.275464 | C | 1 |
| 4  | 0.275464 | C | 1 |
| 4  | 0.275464 | C | 1 |
| 16 | 0.101581 | C | 1 |
| 14 | 0.322252 | C | 1 |
| 2  | 0.068284 | C | 1 |
| 2  | 0.068284 | C | 1 |
| 16 | 0.101581 | C | 1 |
| 4  | 0.275464 | C | 1 |
| 16 | 0.101581 | C | 1 |
| 4  | 0.275464 | C | 1 |
| 4  | 0.275464 | C | 1 |
| 16 | 0.101581 | C | 1 |
| 16 | 0.101581 | C | 1 |
| 4  | 0.275464 | C | 1 |
| 4  | 0.275464 | C | 1 |
| 18 | 0.586625 | C | 1 |
| 18 | 0.586625 | C | 1 |
| 19 | 0.458739 | C | 1 |
| 19 | 0.458739 | C | 1 |
| 18 | 0.586625 | C | 1 |
| 19 | 0.458739 | C | 1 |
| 6  | 0.482906 | C | 1 |
| 19 | 0.458739 | C | 1 |
| 6  | 0.482906 | C | 1 |
| 20 | 0.413552 | C | 1 |
| 6  | 0.482906 | C | 1 |
| 20 | 0.413552 | C | 1 |
| 20 | 0.413552 | C | 1 |
| 20 | 0.413552 | C | 1 |
| 20 | 0.413552 | C | 1 |
| 6  | 0.482906 | C | 1 |
| 20 | 0.413552 | C | 1 |
| 19 | 0.458739 | C | 1 |
| 18 | 0.586625 | C | 1 |
| 6  | 0.482906 | C | 1 |
| 6  | 0.482906 | C | 1 |
| 20 | 0.413552 | C | 1 |
| 18 | 0.586625 | C | 1 |
| 18 | 0.586625 | C | 1 |
| 6  | 0.482906 | C | 1 |
| 18 | 0.586625 | C | 1 |
| 18 | 0.586625 | C | 1 |
| 19 | 0.568694 | C | 1 |
| 19 | 0.568694 | C | 1 |
| 19 | 0.568694 | C | 1 |
| 19 | 0.568694 | C | 1 |
| 15 | 0.327942 | C | 1 |
| 19 | 0.568694 | C | 1 |
| 12 | 0.376061 | C | 1 |
| 15 | 0.327942 | C | 1 |
| 15 | 0.327942 | C | 1 |
| 19 | 0.568694 | C | 1 |
| 19 | 0.568694 | C | 1 |

|               |   |
|---------------|---|
| 12 0.376061 C | 1 |
| 12 0.376061 C | 1 |
| 19 0.568694 C | 1 |
| 6 0.575604 C  | 1 |
| 17 0.538275 B | 1 |
| 17 0.538275 B | 1 |
| 17 0.538275 B | 1 |
| 6 0.575604 C  | 1 |
| 17 0.538275 B | 1 |
| 6 0.575604 C  | 1 |
| 6 0.575604 C  | 1 |
| 17 0.538275 B | 1 |
| 6 0.575604 C  | 1 |
| 17 0.538275 B | 1 |
| 17 0.538275 B | 1 |
| 6 0.388163 C  | 1 |
| 6 0.388163 C  | 1 |
| 19 0.625549 C | 1 |
| 6 0.388163 C  | 1 |
| 6 0.388163 C  | 1 |
| 19 0.625549 C | 1 |
| 19 0.625549 C | 1 |
| 19 0.625549 C | 1 |
| 19 0.625549 C | 1 |
| 6 0.388163 C  | 1 |
| 6 0.388163 C  | 1 |
| 19 0.625549 C | 1 |
| 6 0.388163 C  | 1 |
| 6 0.388163 C  | 1 |
| 19 0.625549 C | 1 |
| 19 0.625549 C | 1 |
| 19 0.625549 C | 1 |
| 19 0.625549 C | 1 |
| 6 0.388163 C  | 1 |
| 19 0.625549 C | 1 |
| 19 0.625549 C | 1 |
| 19 0.625549 C | 1 |
| 19 0.625549 C | 1 |
| 6 0.388163 C  | 1 |
| 7 0.30994 C   | 1 |
| 17 0.541192 G | 0 |
| 17 0.434151 C | 1 |
| 19 0.610878 C | 1 |
| 5 0.13196 C   | 1 |
| 19 0.610878 C | 1 |
| 14 0.777575 C | 1 |
| 6 0.169338 C  | 1 |
| 1 0.134309 C  | 1 |
| 17 0.434151 C | 1 |
| 1 0.072781 C  | 1 |
| 5 0.130257 C  | 1 |
| 7 0.525594 C  | 1 |

|    |          |   |   |
|----|----------|---|---|
| 5  | 0.130257 | C | 1 |
| 17 | 0.434151 | C | 1 |
| 17 | 0.541192 | G | 0 |
| 5  | 0.368271 | C | 1 |
| 17 | 0.541192 | G | 0 |
| 1  | 0.072781 | C | 1 |
| 19 | 0.610878 | C | 1 |
| 14 | 0.777575 | C | 1 |
| 6  | 0.237778 | C | 1 |
| 6  | 0.169338 | C | 1 |
| 6  | 0.169338 | C | 1 |
| 6  | 0.237778 | C | 1 |
| 6  | 0.66727  | E | 1 |
| 5  | 0.130257 | C | 1 |
| 1  | 0.134309 | C | 1 |
| 5  | 0.13196  | C | 1 |
| 5  | 0.315097 | C | 1 |
| 6  | 0.66727  | E | 1 |
| 7  | 0.525594 | C | 1 |
| 20 | 0.289852 | I | 0 |
| 1  | 0.072781 | C | 1 |
| 7  | 0.30994  | C | 1 |
| 5  | 0.368271 | C | 1 |
| 20 | 0.289852 | I | 0 |
| 5  | 0.315097 | C | 1 |
| 5  | 0.130257 | C | 1 |
| 6  | 0.237778 | C | 1 |
| 14 | 0.777575 | C | 1 |
| 7  | 0.30994  | C | 1 |
| 6  | 0.237778 | C | 1 |
| 5  | 0.130257 | C | 1 |
| 17 | 0.434151 | C | 1 |
| 17 | 0.541192 | G | 0 |
| 17 | 0.541192 | G | 0 |
| 6  | 0.66727  | E | 1 |
| 9  | 0.330903 | C | 1 |
| 6  | 0.237778 | C | 1 |
| 1  | 0.134309 | C | 1 |
| 5  | 0.130257 | C | 1 |
| 5  | 0.329077 | I | 0 |
| 17 | 0.434151 | C | 1 |
| 14 | 0.777575 | C | 1 |
| 7  | 0.525594 | C | 1 |
| 1  | 0.072781 | C | 1 |
| 5  | 0.368271 | C | 1 |
| 5  | 0.130257 | C | 1 |
| 5  | 0.130257 | C | 1 |
| 17 | 0.434151 | C | 1 |
| 8  | 0.538707 | C | 1 |
| 1  | 0.072781 | C | 1 |
| 6  | 0.66727  | E | 1 |
| 6  | 0.237778 | C | 1 |
| 7  | 0.525594 | C | 1 |
| 7  | 0.525594 | C | 1 |

|    |          |   |   |
|----|----------|---|---|
| 5  | 0.315097 | C | 1 |
| 8  | 0.538707 | C | 1 |
| 1  | 0.072781 | C | 1 |
| 20 | 0.289852 | I | 0 |
| 14 | 0.777575 | C | 1 |
| 7  | 0.525594 | C | 1 |
| 8  | 0.538707 | C | 1 |
| 5  | 0.329077 | I | 0 |
| 6  | 0.66727  | E | 1 |
| 20 | 0.289852 | I | 0 |
| 7  | 0.30994  | C | 1 |
| 1  | 0.072781 | C | 1 |
| 7  | 0.525594 | C | 1 |
| 9  | 0.330903 | C | 1 |
| 7  | 0.30994  | C | 1 |
| 9  | 0.330903 | C | 1 |
| 7  | 0.30994  | C | 1 |
| 5  | 0.130257 | C | 1 |
| 20 | 0.289852 | I | 0 |
| 5  | 0.315097 | C | 1 |
| 20 | 0.289852 | I | 0 |
| 19 | 0.610878 | C | 1 |
| 5  | 0.130257 | C | 1 |
| 6  | 0.169338 | C | 1 |
| 5  | 0.368271 | C | 1 |
| 5  | 0.315097 | C | 1 |
| 7  | 0.30994  | C | 1 |
| 7  | 0.525594 | C | 1 |
| 1  | 0.134309 | C | 1 |
| 14 | 0.777575 | C | 1 |
| 7  | 0.525594 | C | 1 |
| 5  | 0.130257 | C | 1 |
| 14 | 0.777575 | C | 1 |
| 7  | 0.525594 | C | 1 |
| 5  | 0.368271 | C | 1 |
| 7  | 0.525594 | C | 1 |
| 9  | 0.330903 | C | 1 |
| 5  | 0.368271 | C | 1 |
| 5  | 0.13196  | C | 1 |
| 6  | 0.237778 | C | 1 |
| 6  | 0.169338 | C | 1 |
| 6  | 0.169338 | C | 1 |
| 5  | 0.13196  | C | 1 |
| 6  | 0.169338 | C | 1 |
| 14 | 0.777575 | C | 1 |
| 9  | 0.330903 | C | 1 |
| 6  | 0.237778 | C | 1 |
| 5  | 0.13196  | C | 1 |
| 7  | 0.525594 | C | 1 |
| 7  | 0.525594 | C | 1 |
| 7  | 0.30994  | C | 1 |
| 5  | 0.329077 | I | 0 |
| 17 | 0.434151 | C | 1 |
| 20 | 0.289852 | I | 0 |



|    |          |   |   |
|----|----------|---|---|
| 7  | 0.44609  | C | 1 |
| 7  | 0.44609  | C | 1 |
| 7  | 0.44609  | C | 1 |
| 7  | 0.44609  | C | 1 |
| 12 | 0.539441 | A | 0 |
| 12 | 0.539441 | A | 0 |
| 7  | 0.44609  | C | 1 |
| 7  | 0.44609  | C | 1 |
| 12 | 0.539441 | A | 0 |
| 7  | 0.44609  | C | 1 |
| 12 | 0.539441 | A | 0 |
| 7  | 0.44609  | C | 1 |
| 12 | 0.539441 | A | 0 |
| 12 | 0.539441 | A | 0 |
| 7  | 0.44609  | C | 1 |
| 7  | 0.44609  | C | 1 |
| 12 | 0.539441 | A | 0 |
| 12 | 0.539441 | A | 0 |
| 7  | 0.44609  | C | 1 |
| 7  | 0.44609  | C | 1 |
| 7  | 0.44609  | C | 1 |
| 7  | 0.44609  | C | 1 |
| 16 | 0.473969 | C | 1 |
| 9  | 0.305062 | C | 1 |
| 5  | 0.095412 | C | 1 |
| 5  | 0.180117 | C | 1 |
| 12 | 0.471677 | C | 1 |
| 12 | 0.471677 | C | 1 |
| 12 | 0.471677 | C | 1 |
| 5  | 0.180117 | C | 1 |
| 5  | 0.095412 | C | 1 |
| 19 | 0.534345 | C | 1 |
| 10 | 0.318608 | C | 1 |
| 9  | 0.305062 | C | 1 |
| 4  | 0.279974 | C | 1 |
| 6  | 0.428432 | C | 1 |
| 5  | 0.48343  | C | 1 |
| 5  | 0.095412 | C | 1 |
| 16 | 0.473969 | C | 1 |
| 16 | 0.473969 | C | 1 |
| 19 | 0.534345 | C | 1 |
| 5  | 0.118043 | I | 0 |
| 6  | 0.428432 | C | 1 |
| 9  | 0.305062 | C | 1 |
| 12 | 0.471677 | C | 1 |
| 23 | 0.361142 | C | 1 |
| 4  | 0.279974 | C | 1 |
| 7  | 0.503823 | R | 0 |
| 6  | 0.428432 | C | 1 |
| 9  | 0.305062 | C | 1 |
| 12 | 0.471677 | C | 1 |
| 12 | 0.471677 | C | 1 |
| 10 | 0.318608 | C | 1 |
| 7  | 0.503823 | R | 0 |



|    |          |   |   |
|----|----------|---|---|
| 12 | 0.471677 | C | 1 |
| 19 | 0.534345 | C | 1 |
| 5  | 0.365342 | C | 1 |
| 19 | 0.534345 | C | 1 |
| 6  | 0.428432 | C | 1 |
| 19 | 0.534345 | C | 1 |
| 1  | 0.195618 | C | 1 |
| 10 | 0.318608 | C | 1 |
| 5  | 0.365342 | C | 1 |
| 19 | 0.534345 | C | 1 |
| 12 | 0.471677 | C | 1 |
| 5  | 0.147575 | C | 1 |
| 6  | 0.428432 | C | 1 |
| 5  | 0.48343  | C | 1 |
| 12 | 0.471677 | C | 1 |
| 16 | 0.473969 | C | 1 |
| 7  | 0.503823 | R | 0 |
| 4  | 0.279974 | C | 1 |
| 5  | 0.118043 | I | 0 |
| 12 | 0.471677 | C | 1 |
| 12 | 0.471677 | C | 1 |
| 19 | 0.534345 | C | 1 |
| 7  | 0.503823 | R | 0 |
| 19 | 0.534345 | C | 1 |
| 6  | 0.428432 | C | 1 |
| 1  | 0.195618 | C | 1 |
| 5  | 0.48343  | C | 1 |
| 23 | 0.361142 | C | 1 |
| 12 | 0.471677 | C | 1 |
| 12 | 0.471677 | C | 1 |
| 5  | 0.48343  | C | 1 |
| 5  | 0.147575 | C | 1 |
| 19 | 0.534345 | C | 1 |
| 19 | 0.534345 | C | 1 |
| 5  | 0.095412 | C | 1 |
| 5  | 0.147575 | C | 1 |
| 5  | 0.365342 | C | 1 |
| 7  | 0.503823 | R | 0 |
| 5  | 0.095412 | C | 1 |
| 5  | 0.365342 | C | 1 |
| 23 | 0.361142 | C | 1 |
| 16 | 0.473969 | C | 1 |
| 12 | 0.471677 | C | 1 |
| 19 | 0.534345 | C | 1 |
| 23 | 0.361142 | C | 1 |
| 12 | 0.471677 | C | 1 |
| 23 | 0.361142 | C | 1 |
| 12 | 0.471677 | C | 1 |
| 12 | 0.471677 | C | 1 |
| 12 | 0.471677 | C | 1 |
| 19 | 0.534345 | C | 1 |
| 23 | 0.361142 | C | 1 |
| 4  | 0.279974 | C | 1 |
| 12 | 0.471677 | C | 1 |

|    |          |   |   |
|----|----------|---|---|
| 5  | 0.365342 | C | 1 |
| 5  | 0.48343  | C | 1 |
| 6  | 0.428432 | C | 1 |
| 9  | 0.305062 | C | 1 |
| 10 | 0.318608 | C | 1 |
| 23 | 0.361142 | C | 1 |
| 19 | 0.534345 | C | 1 |
| 19 | 0.534345 | C | 1 |
| 6  | 0.428432 | C | 1 |
| 5  | 0.095412 | C | 1 |
| 23 | 0.361142 | C | 1 |
| 23 | 0.361142 | C | 1 |
| 5  | 0.147575 | C | 1 |
| 16 | 0.473969 | C | 1 |
| 5  | 0.48343  | C | 1 |
| 23 | 0.361142 | C | 1 |
| 23 | 0.361142 | C | 1 |
| 5  | 0.095412 | C | 1 |
| 19 | 0.534345 | C | 1 |
| 5  | 0.095412 | C | 1 |
| 19 | 0.534345 | C | 1 |
| 4  | 0.279974 | C | 1 |
| 9  | 0.305062 | C | 1 |
| 5  | 0.095412 | C | 1 |
| 10 | 0.318608 | C | 1 |
| 7  | 0.503823 | R | 0 |
| 5  | 0.365342 | C | 1 |
| 5  | 0.118043 | I | 0 |
| 5  | 0.48343  | C | 1 |
| 5  | 0.48343  | C | 1 |
| 5  | 0.095412 | C | 1 |
| 4  | 0.279974 | C | 1 |
| 19 | 0.534345 | C | 1 |
| 1  | 0.195618 | C | 1 |
| 5  | 0.180117 | C | 1 |
| 5  | 0.147575 | C | 1 |
| 12 | 0.671191 | C | 1 |
| 14 | 0.32833  | C | 1 |
| 16 | 0.417542 | C | 1 |
| 20 | 0.60694  | C | 1 |
| 12 | 0.671191 | C | 1 |
| 14 | 0.32833  | C | 1 |
| 9  | 0.464449 | C | 1 |
| 16 | 0.417542 | C | 1 |
| 14 | 0.32833  | C | 1 |
| 20 | 0.60694  | C | 1 |
| 20 | 0.60694  | C | 1 |
| 12 | 0.671191 | C | 1 |
| 16 | 0.417542 | C | 1 |
| 16 | 0.417542 | C | 1 |
| 20 | 0.60694  | C | 1 |
| 9  | 0.464449 | C | 1 |
| 20 | 0.60694  | C | 1 |
| 14 | 0.32833  | C | 1 |

|    |          |   |   |
|----|----------|---|---|
| 9  | 0.464449 | C | 1 |
| 9  | 0.464449 | C | 1 |
| 9  | 0.464449 | C | 1 |
| 12 | 0.671191 | C | 1 |
| 14 | 0.32833  | C | 1 |
| 20 | 0.60694  | C | 1 |
| 16 | 0.417542 | C | 1 |
| 20 | 0.60694  | C | 1 |
| 14 | 0.32833  | C | 1 |
| 16 | 0.417542 | C | 1 |
| 20 | 0.60694  | C | 1 |
| 14 | 0.32833  | C | 1 |
| 20 | 0.60694  | C | 1 |
| 14 | 0.32833  | C | 1 |
| 20 | 0.60694  | C | 1 |
| 14 | 0.32833  | C | 1 |
| 12 | 0.671191 | C | 1 |
| 20 | 0.60694  | C | 1 |
| 14 | 0.32833  | C | 1 |
| 14 | 0.32833  | C | 1 |
| 20 | 0.60694  | C | 1 |
| 12 | 0.671191 | C | 1 |
| 20 | 0.60694  | C | 1 |
| 14 | 0.32833  | C | 1 |
| 18 | 0.70695  | D | 1 |
| 18 | 0.70695  | D | 1 |
| 18 | 0.70695  | D | 1 |
| 18 | 0.70695  | D | 1 |
| 20 | 0.448156 | C | 1 |
| 20 | 0.448156 | C | 1 |
| 20 | 0.448156 | C | 1 |
| 20 | 0.448156 | C | 1 |
| 18 | 0.70695  | D | 1 |
| 18 | 0.70695  | D | 1 |
| 18 | 0.70695  | D | 1 |
| 18 | 0.70695  | D | 1 |
| 18 | 0.70695  | D | 1 |
| 20 | 0.448156 | C | 1 |
| 20 | 0.448156 | C | 1 |
| 20 | 0.448156 | C | 1 |
| 4  | 0.387844 | C | 1 |
| 4  | 0.387844 | C | 1 |
| 4  | 0.387844 | C | 1 |
| 4  | 0.387844 | C | 1 |
| 4  | 0.387844 | C | 1 |
| 17 | 0.489455 | C | 1 |
| 8  | 0.150889 | C | 1 |
| 10 | 0.440527 | K | 1 |
| 10 | 0.440527 | K | 1 |
| 17 | 0.489455 | C | 1 |
| 8  | 0.150889 | C | 1 |
| 8  | 0.150889 | C | 1 |
| 15 | 0.268339 | C | 1 |
| 17 | 0.489455 | C | 1 |

|    |          |   |   |
|----|----------|---|---|
| 9  | 0.181932 | C | 1 |
| 17 | 0.489455 | C | 1 |
| 5  | 0.258778 | C | 1 |
| 17 | 0.489455 | C | 1 |
| 8  | 0.150889 | C | 1 |
| 22 | 0.277618 | C | 1 |
| 17 | 0.489455 | C | 1 |
| 17 | 0.489455 | C | 1 |
| 9  | 0.181932 | C | 1 |
| 15 | 0.268339 | C | 1 |
| 22 | 0.277618 | C | 1 |
| 17 | 0.489455 | C | 1 |
| 8  | 0.150889 | C | 1 |
| 22 | 0.277618 | C | 1 |
| 20 | 0.310828 | C | 1 |
| 15 | 0.268339 | C | 1 |
| 9  | 0.181932 | C | 1 |
| 8  | 0.150889 | C | 1 |
| 17 | 0.489455 | C | 1 |
| 17 | 0.489455 | C | 1 |
| 8  | 0.150889 | C | 1 |
| 10 | 0.440527 | K | 1 |
| 22 | 0.277618 | C | 1 |
| 15 | 0.268339 | C | 1 |
| 9  | 0.181932 | C | 1 |
| 5  | 0.258778 | C | 1 |
| 17 | 0.489455 | C | 1 |
| 5  | 0.258778 | C | 1 |
| 8  | 0.150889 | C | 1 |
| 17 | 0.489455 | C | 1 |
| 5  | 0.258778 | C | 1 |
| 17 | 0.489455 | C | 1 |
| 17 | 0.489455 | C | 1 |
| 5  | 0.258778 | C | 1 |
| 17 | 0.489455 | C | 1 |
| 5  | 0.258778 | C | 1 |
| 20 | 0.310828 | C | 1 |
| 8  | 0.150889 | C | 1 |
| 15 | 0.268339 | C | 1 |
| 10 | 0.440527 | K | 1 |
| 22 | 0.277618 | C | 1 |
| 15 | 0.268339 | C | 1 |
| 10 | 0.440527 | K | 1 |
| 10 | 0.440527 | K | 1 |
| 17 | 0.489455 | C | 1 |
| 9  | 0.181932 | C | 1 |
| 8  | 0.150889 | C | 1 |
| 8  | 0.150889 | C | 1 |
| 8  | 0.150889 | C | 1 |
| 17 | 0.489455 | C | 1 |
| 15 | 0.268339 | C | 1 |
| 15 | 0.268339 | C | 1 |
| 15 | 0.268339 | C | 1 |
| 8  | 0.150889 | C | 1 |

|    |          |   |   |
|----|----------|---|---|
| 5  | 0.258778 | C | 1 |
| 20 | 0.310828 | C | 1 |
| 17 | 0.489455 | C | 1 |
| 15 | 0.268339 | C | 1 |
| 8  | 0.150889 | C | 1 |
| 17 | 0.489455 | C | 1 |
| 17 | 0.489455 | C | 1 |
| 9  | 0.181932 | C | 1 |
| 8  | 0.150889 | C | 1 |
| 15 | 0.268339 | C | 1 |
| 10 | 0.440527 | K | 1 |
| 19 | 0.622761 | C | 1 |
| 6  | 0.120836 | C | 1 |
| 8  | 0.342281 | I | 0 |
| 2  | 0.259531 | C | 1 |
| 19 | 0.622761 | C | 1 |
| 8  | 0.342281 | I | 0 |
| 23 | 0.3635   | C | 1 |
| 21 | 0.7244   | C | 1 |
| 8  | 0.342281 | I | 0 |
| 20 | 0.282593 | C | 1 |
| 8  | 0.342281 | I | 0 |
| 23 | 0.3635   | C | 1 |
| 20 | 0.282593 | C | 1 |
| 18 | 0.536309 | C | 1 |
| 14 | 0.714043 | D | 1 |
| 21 | 0.7244   | C | 1 |
| 8  | 0.342281 | I | 0 |
| 6  | 0.120836 | C | 1 |
| 20 | 0.282593 | C | 1 |
| 20 | 0.282593 | C | 1 |
| 19 | 0.622761 | C | 1 |
| 16 | 0.681533 | D | 1 |
| 23 | 0.3635   | C | 1 |
| 19 | 0.622761 | C | 1 |
| 2  | 0.259531 | C | 1 |
| 21 | 0.7244   | C | 1 |
| 21 | 0.7244   | C | 1 |
| 16 | 0.681533 | D | 1 |
| 19 | 0.622761 | C | 1 |
| 2  | 0.259531 | C | 1 |
| 23 | 0.3635   | C | 1 |
| 8  | 0.342281 | I | 0 |
| 20 | 0.282593 | C | 1 |
| 2  | 0.259531 | C | 1 |
| 6  | 0.120836 | C | 1 |
| 23 | 0.3635   | C | 1 |
| 18 | 0.642276 | C | 1 |
| 19 | 0.622761 | C | 1 |
| 18 | 0.642276 | C | 1 |
| 21 | 0.7244   | C | 1 |
| 14 | 0.714043 | D | 1 |
| 18 | 0.536309 | C | 1 |
| 6  | 0.120836 | C | 1 |

|    |          |   |   |
|----|----------|---|---|
| 18 | 0.536309 | C | 1 |
| 19 | 0.622761 | C | 1 |
| 18 | 0.536309 | C | 1 |
| 18 | 0.536309 | C | 1 |
| 20 | 0.282593 | C | 1 |
| 21 | 0.7244   | C | 1 |
| 21 | 0.7244   | C | 1 |
| 23 | 0.3635   | C | 1 |
| 21 | 0.7244   | C | 1 |
| 21 | 0.7244   | C | 1 |
| 20 | 0.282593 | C | 1 |
| 18 | 0.642276 | C | 1 |
| 21 | 0.7244   | C | 1 |
| 6  | 0.120836 | C | 1 |
| 23 | 0.3635   | C | 1 |
| 21 | 0.7244   | C | 1 |
| 6  | 0.120836 | C | 1 |
| 6  | 0.120836 | C | 1 |
| 23 | 0.3635   | C | 1 |
| 21 | 0.7244   | C | 1 |
| 2  | 0.259531 | C | 1 |
| 23 | 0.3635   | C | 1 |
| 23 | 0.3635   | C | 1 |
| 14 | 0.714043 | D | 1 |
| 18 | 0.642276 | C | 1 |
| 23 | 0.3635   | C | 1 |
| 23 | 0.3635   | C | 1 |
| 2  | 0.259531 | C | 1 |
| 23 | 0.3635   | C | 1 |
| 23 | 0.3635   | C | 1 |
| 16 | 0.681533 | D | 1 |
| 19 | 0.622761 | C | 1 |
| 23 | 0.3635   | C | 1 |
| 18 | 0.642276 | C | 1 |
| 19 | 0.622761 | C | 1 |
| 20 | 0.282593 | C | 1 |
| 23 | 0.3635   | C | 1 |
| 6  | 0.120836 | C | 1 |
| 8  | 0.342281 | I | 0 |
| 6  | 0.120836 | C | 1 |
| 21 | 0.7244   | C | 1 |
| 20 | 0.282593 | C | 1 |
| 6  | 0.120836 | C | 1 |
| 21 | 0.7244   | C | 1 |
| 21 | 0.7244   | C | 1 |
| 1  | 0.408701 | C | 1 |
| 5  | 0.077297 | C | 1 |
| 18 | 0.345985 | C | 1 |
| 18 | 0.345985 | C | 1 |
| 4  | 0.132799 | C | 1 |
| 20 | 0.788814 | D | 1 |
| 2  | 0.229196 | C | 1 |
| 6  | 0.534003 | C | 1 |
| 2  | 0.229196 | C | 1 |

|    |          |   |   |
|----|----------|---|---|
| 2  | 0.229196 | C | 1 |
| 2  | 0.229196 | C | 1 |
| 5  | 0.077297 | C | 1 |
| 16 | 0.272909 | A | 0 |
| 6  | 0.534003 | C | 1 |
| 2  | 0.229196 | C | 1 |
| 4  | 0.315597 | C | 1 |
| 6  | 0.388483 | C | 1 |
| 1  | 0.339245 | C | 1 |
| 16 | 0.576009 | C | 1 |
| 6  | 0.388483 | C | 1 |
| 1  | 0.408701 | C | 1 |
| 16 | 0.137648 | C | 1 |
| 15 | 0.52534  | G | 0 |
| 16 | 0.137648 | C | 1 |
| 17 | 0.86896  | C | 1 |
| 13 | 0.439822 | I | 0 |
| 15 | 0.52534  | G | 0 |
| 13 | 0.439822 | I | 0 |
| 5  | 0.486124 | N | 0 |
| 18 | 0.345985 | C | 1 |
| 16 | 0.576009 | C | 1 |
| 1  | 0.408701 | C | 1 |
| 6  | 0.388483 | C | 1 |
| 6  | 0.534003 | C | 1 |
| 20 | 0.788814 | D | 1 |
| 2  | 0.433965 | C | 1 |
| 10 | 0.690726 | C | 1 |
| 6  | 0.534003 | C | 1 |
| 20 | 0.788814 | D | 1 |
| 5  | 0.077297 | C | 1 |
| 20 | 0.539386 | C | 1 |
| 17 | 0.639346 | G | 0 |
| 4  | 0.315597 | C | 1 |
| 6  | 0.534003 | C | 1 |
| 1  | 0.408701 | C | 1 |
| 16 | 0.137648 | C | 1 |
| 6  | 0.534003 | C | 1 |
| 10 | 0.690726 | C | 1 |
| 4  | 0.209192 |   | 0 |
| 16 | 0.137648 | C | 1 |
| 2  | 0.229196 | C | 1 |
| 15 | 0.52534  | G | 0 |
| 18 | 0.345985 | C | 1 |
| 20 | 0.788814 | D | 1 |
| 4  | 0.209192 |   | 0 |
| 5  | 0.077297 | C | 1 |
| 13 | 0.575834 | C | 1 |
| 4  | 0.132799 | C | 1 |
| 6  | 0.221811 | C | 1 |
| 16 | 0.576009 | C | 1 |
| 4  | 0.132799 | C | 1 |
| 1  | 0.408701 | C | 1 |
| 12 | 0.322412 | A | 0 |

|    |          |   |   |
|----|----------|---|---|
| 16 | 0.137648 | C | 1 |
| 17 | 0.86896  | C | 1 |
| 5  | 0.486124 | N | 0 |
| 6  | 0.388483 | C | 1 |
| 6  | 0.221811 | C | 1 |
| 1  | 0.408701 | C | 1 |
| 10 | 0.690726 | C | 1 |
| 13 | 0.575834 | C | 1 |
| 5  | 0.486124 | N | 0 |
| 6  | 0.388483 | C | 1 |
| 17 | 0.639346 | G | 0 |
| 17 | 0.86896  | C | 1 |
| 4  | 0.209192 |   | 0 |
| 6  | 0.388483 | C | 1 |
| 6  | 0.221811 | C | 1 |
| 16 | 0.272909 | A | 0 |
| 13 | 0.575834 | C | 1 |
| 17 | 0.86896  | C | 1 |
| 4  | 0.231723 | C | 1 |
| 6  | 0.534003 | C | 1 |
| 6  | 0.534003 | C | 1 |
| 20 | 0.788814 | D | 1 |
| 6  | 0.534003 | C | 1 |
| 1  | 0.339245 | C | 1 |
| 5  | 0.077297 | C | 1 |
| 7  | 0.307227 | C | 1 |
| 20 | 0.539386 | C | 1 |
| 13 | 0.439822 | I | 0 |
| 20 | 0.788814 | D | 1 |
| 20 | 0.788814 | D | 1 |
| 4  | 0.315597 | C | 1 |
| 10 | 0.690726 | C | 1 |
| 4  | 0.209192 |   | 0 |
| 15 | 0.52534  | G | 0 |
| 16 | 0.137648 | C | 1 |
| 7  | 0.307227 | C | 1 |
| 2  | 0.433965 | C | 1 |
| 20 | 0.539386 | C | 1 |
| 15 | 0.52534  | G | 0 |
| 17 | 0.86896  | C | 1 |
| 17 | 0.86896  | C | 1 |
| 4  | 0.231723 | C | 1 |
| 17 | 0.86896  | C | 1 |
| 5  | 0.077297 | C | 1 |
| 2  | 0.433965 | C | 1 |
| 16 | 0.576009 | C | 1 |
| 6  | 0.221811 | C | 1 |
| 5  | 0.077297 | C | 1 |
| 12 | 0.322412 | A | 0 |
| 6  | 0.221811 | C | 1 |
| 5  | 0.077297 | C | 1 |
| 16 | 0.576009 | C | 1 |
| 20 | 0.788814 | D | 1 |
| 13 | 0.575834 | C | 1 |



|    |          |   |   |
|----|----------|---|---|
| 16 | 0.272909 | A | 0 |
| 4  | 0.209192 |   | 0 |
| 16 | 0.272909 | A | 0 |
| 18 | 0.345985 | C | 1 |
| 18 | 0.345985 | C | 1 |
| 16 | 0.272909 | A | 0 |
| 4  | 0.132799 | C | 1 |
| 18 | 0.345985 | C | 1 |
| 5  | 0.486124 | N | 0 |
| 16 | 0.272909 | A | 0 |
| 16 | 0.576009 | C | 1 |
| 16 | 0.576009 | C | 1 |
| 16 | 0.137648 | C | 1 |
| 6  | 0.221811 | C | 1 |
| 20 | 0.539386 | C | 1 |
| 4  | 0.231723 | C | 1 |
| 7  | 0.307227 | C | 1 |
| 16 | 0.576009 | C | 1 |
| 13 | 0.575834 | C | 1 |
| 10 | 0.690726 | C | 1 |
| 5  | 0.486124 | N | 0 |
| 2  | 0.229196 | C | 1 |
| 13 | 0.575834 | C | 1 |
| 16 | 0.576009 | C | 1 |
| 16 | 0.576009 | C | 1 |
| 20 | 0.788814 | D | 1 |
| 16 | 0.576009 | C | 1 |
| 13 | 0.575834 | C | 1 |
| 20 | 0.539386 | C | 1 |
| 20 | 0.539386 | C | 1 |
| 4  | 0.209192 |   | 0 |
| 20 | 0.788814 | D | 1 |
| 6  | 0.221811 | C | 1 |
| 12 | 0.322412 | A | 0 |
| 2  | 0.229196 | C | 1 |
| 13 | 0.575834 | C | 1 |
| 7  | 0.307227 | C | 1 |
| 20 | 0.539386 | C | 1 |
| 16 | 0.576009 | C | 1 |
| 13 | 0.575834 | C | 1 |
| 16 | 0.576009 | C | 1 |
| 6  | 0.221811 | C | 1 |
| 5  | 0.077297 | C | 1 |
| 17 | 0.86896  | C | 1 |
| 2  | 0.433965 | C | 1 |
| 20 | 0.788814 | D | 1 |
| 7  | 0.307227 | C | 1 |
| 16 | 0.137648 | C | 1 |
| 17 | 0.639346 | G | 0 |
| 4  | 0.315597 | C | 1 |
| 16 | 0.137648 | C | 1 |
| 1  | 0.408701 | C | 1 |
| 4  | 0.315597 | C | 1 |
| 20 | 0.788814 | D | 1 |

|    |          |   |   |
|----|----------|---|---|
| 10 | 0.690726 | C | 1 |
| 20 | 0.539386 | C | 1 |
| 4  | 0.209192 |   | 0 |
| 16 | 0.576009 | C | 1 |
| 10 | 0.690726 | C | 1 |
| 7  | 0.307227 | C | 1 |
| 7  | 0.307227 | C | 1 |
| 16 | 0.272909 | A | 0 |
| 10 | 0.690726 | C | 1 |
| 16 | 0.272909 | A | 0 |
| 20 | 0.788814 | D | 1 |
| 16 | 0.137648 | C | 1 |
| 6  | 0.534003 | C | 1 |
| 6  | 0.221811 | C | 1 |
| 20 | 0.539386 | C | 1 |
| 17 | 0.639346 | G | 0 |
| 6  | 0.534003 | C | 1 |
| 6  | 0.534003 | C | 1 |
| 1  | 0.408701 | C | 1 |
| 15 | 0.52534  | G | 0 |
| 20 | 0.539386 | C | 1 |
| 10 | 0.690726 | C | 1 |
| 1  | 0.339245 | C | 1 |
| 12 | 0.322412 | A | 0 |
| 16 | 0.576009 | C | 1 |
| 7  | 0.307227 | C | 1 |
| 16 | 0.576009 | C | 1 |
| 2  | 0.433965 | C | 1 |
| 4  | 0.231723 | C | 1 |
| 20 | 0.788814 | D | 1 |
| 10 | 0.690726 | C | 1 |
| 20 | 0.539386 | C | 1 |
| 16 | 0.576009 | C | 1 |
| 10 | 0.690726 | C | 1 |
| 4  | 0.231723 | C | 1 |
| 17 | 0.639346 | G | 0 |
| 13 | 0.575834 | C | 1 |
| 20 | 0.788814 | D | 1 |
| 12 | 0.322412 | A | 0 |
| 4  | 0.209192 |   | 0 |
| 5  | 0.486124 | N | 0 |
| 10 | 0.689065 | B | 1 |
| 10 | 0.689065 | B | 1 |
| 5  | 0.233178 | C | 1 |
| 10 | 0.689065 | B | 1 |
| 5  | 0.233178 | C | 1 |
| 5  | 0.233178 | C | 1 |
| 10 | 0.689065 | B | 1 |
| 5  | 0.233178 | C | 1 |
| 5  | 0.233178 | C | 1 |
| 5  | 0.233178 | C | 1 |
| 5  | 0.233178 | C | 1 |
| 10 | 0.689065 | B | 1 |
| 10 | 0.689065 | B | 1 |



|    |          |   |   |
|----|----------|---|---|
| 19 | 0.400186 | C | 1 |
| 5  | 0.526422 | C | 1 |
| 5  | 0.093002 | I | 0 |
| 5  | 0.093002 | I | 0 |
| 19 | 0.400186 | C | 1 |
| 5  | 0.093002 | I | 0 |
| 14 | 0.248869 | C | 1 |
| 1  | 0.463371 | C | 1 |
| 23 | 0.713685 | C | 1 |
| 10 | 0.332997 | C | 1 |
| 6  | 0.310281 | C | 1 |
| 14 | 0.248869 | C | 1 |
| 7  | 0.748315 | C | 1 |
| 23 | 0.713685 | C | 1 |
| 23 | 0.713685 | C | 1 |
| 5  | 0.526422 | C | 1 |
| 23 | 0.713685 | C | 1 |
| 20 | 0.627498 | C | 1 |
| 16 | 0.551604 | C | 1 |
| 23 | 0.713685 | C | 1 |
| 20 | 0.627498 | C | 1 |
| 23 | 0.713685 | C | 1 |
| 23 | 0.713685 | C | 1 |
| 6  | 0.310281 | C | 1 |
| 10 | 0.410282 | C | 1 |
| 5  | 0.093002 | I | 0 |
| 5  | 0.64741  | C | 1 |
| 23 | 0.713685 | C | 1 |
| 6  | 0.440019 | C | 1 |
| 6  | 0.310281 | C | 1 |
| 5  | 0.526422 | C | 1 |
| 23 | 0.438805 | C | 1 |
| 7  | 0.748315 | C | 1 |
| 23 | 0.713685 | C | 1 |
| 6  | 0.440019 | C | 1 |
| 23 | 0.713685 | C | 1 |
| 5  | 0.093002 | I | 0 |
| 19 | 0.400186 | C | 1 |
| 20 | 0.627498 | C | 1 |
| 16 | 0.551604 | C | 1 |
| 5  | 0.526422 | C | 1 |
| 23 | 0.713685 | C | 1 |
| 16 | 0.551604 | C | 1 |
| 7  | 0.748315 | C | 1 |
| 1  | 0.463371 | C | 1 |
| 10 | 0.410282 | C | 1 |
| 23 | 0.713685 | C | 1 |
| 16 | 0.551604 | C | 1 |
| 6  | 0.440019 | C | 1 |
| 5  | 0.526422 | C | 1 |
| 6  | 0.440019 | C | 1 |
| 10 | 0.332997 | C | 1 |
| 23 | 0.713685 | C | 1 |
| 7  | 0.748315 | C | 1 |

|    |          |   |   |
|----|----------|---|---|
| 23 | 0.713685 | C | 1 |
| 14 | 0.248869 | C | 1 |
| 23 | 0.713685 | C | 1 |
| 5  | 0.362719 | C | 1 |
| 23 | 0.713685 | C | 1 |
| 23 | 0.713685 | C | 1 |
| 10 | 0.332997 | C | 1 |
| 7  | 0.748315 | C | 1 |
| 7  | 0.748315 | C | 1 |
| 6  | 0.310281 | C | 1 |
| 5  | 0.362719 | C | 1 |
| 20 | 0.627498 | C | 1 |
| 10 | 0.332997 | C | 1 |
| 19 | 0.400186 | C | 1 |
| 16 | 0.551604 | C | 1 |
| 10 | 0.410282 | C | 1 |
| 6  | 0.310281 | C | 1 |
| 10 | 0.410282 | C | 1 |
| 5  | 0.64741  | C | 1 |
| 5  | 0.362719 | C | 1 |
| 10 | 0.410282 | C | 1 |
| 23 | 0.713685 | C | 1 |
| 5  | 0.093002 | I | 0 |
| 5  | 0.093002 | I | 0 |
| 5  | 0.64741  | C | 1 |
| 16 | 0.551604 | C | 1 |
| 23 | 0.713685 | C | 1 |
| 10 | 0.410282 | C | 1 |
| 5  | 0.362719 | C | 1 |
| 5  | 0.526422 | C | 1 |
| 10 | 0.410282 | C | 1 |
| 14 | 0.248869 | C | 1 |
| 19 | 0.400186 | C | 1 |
| 7  | 0.748315 | C | 1 |
| 23 | 0.713685 | C | 1 |
| 10 | 0.410282 | C | 1 |
| 20 | 0.627498 | C | 1 |
| 7  | 0.748315 | C | 1 |
| 19 | 0.400186 | C | 1 |
| 16 | 0.551604 | C | 1 |
| 16 | 0.551604 | C | 1 |
| 23 | 0.713685 | C | 1 |
| 10 | 0.332997 | C | 1 |
| 5  | 0.526422 | C | 1 |
| 23 | 0.438805 | C | 1 |
| 7  | 0.748315 | C | 1 |
| 6  | 0.440019 | C | 1 |
| 5  | 0.64741  | C | 1 |
| 16 | 0.551604 | C | 1 |
| 6  | 0.310281 | C | 1 |
| 23 | 0.438805 | C | 1 |
| 23 | 0.438805 | C | 1 |
| 5  | 0.093002 | I | 0 |
| 5  | 0.362719 | C | 1 |

|    |          |   |   |
|----|----------|---|---|
| 23 | 0.713685 | C | 1 |
| 20 | 0.627498 | C | 1 |
| 6  | 0.310281 | C | 1 |
| 16 | 0.551604 | C | 1 |
| 16 | 0.551604 | C | 1 |
| 19 | 0.400186 | C | 1 |
| 5  | 0.362719 | C | 1 |
| 23 | 0.713685 | C | 1 |
| 23 | 0.713685 | C | 1 |
| 23 | 0.438805 | C | 1 |
| 1  | 0.463371 | C | 1 |
| 23 | 0.713685 | C | 1 |
| 23 | 0.713685 | C | 1 |
| 23 | 0.713685 | C | 1 |
| 23 | 0.713685 | C | 1 |
| 23 | 0.713685 | C | 1 |
| 23 | 0.713685 | C | 1 |
| 23 | 0.713685 | C | 1 |
| 16 | 0.551604 | C | 1 |
| 23 | 0.713685 | C | 1 |
| 16 | 0.551604 | C | 1 |
| 5  | 0.526422 | C | 1 |
| 19 | 0.400186 | C | 1 |
| 20 | 0.627498 | C | 1 |
| 19 | 0.400186 | C | 1 |
| 16 | 0.551604 | C | 1 |
| 7  | 0.748315 | C | 1 |
| 10 | 0.332997 | C | 1 |
| 23 | 0.713685 | C | 1 |
| 23 | 0.713685 | C | 1 |
| 1  | 0.463371 | C | 1 |
| 6  | 0.440019 | C | 1 |
| 20 | 0.627498 | C | 1 |
| 14 | 0.248869 | C | 1 |
| 23 | 0.713685 | C | 1 |
| 23 | 0.713685 | C | 1 |
| 23 | 0.713685 | C | 1 |
| 23 | 0.438805 | C | 1 |
| 6  | 0.310281 | C | 1 |
| 23 | 0.713685 | C | 1 |
| 10 | 0.410282 | C | 1 |
| 5  | 0.64741  | C | 1 |
| 16 | 0.551604 | C | 1 |
| 19 | 0.400186 | C | 1 |
| 6  | 0.440019 | C | 1 |
| 5  | 0.362719 | C | 1 |
| 23 | 0.713685 | C | 1 |
| 5  | 0.64741  | C | 1 |
| 23 | 0.713685 | C | 1 |
| 7  | 0.748315 | C | 1 |
| 10 | 0.410282 | C | 1 |
| 7  | 0.748315 | C | 1 |
| 20 | 0.627498 | C | 1 |
| 5  | 0.526422 | C | 1 |

|    |          |   |   |
|----|----------|---|---|
| 5  | 0.64741  | C | 1 |
| 10 | 0.332997 | C | 1 |
| 10 | 0.410282 | C | 1 |
| 1  | 0.463371 | C | 1 |
| 7  | 0.748315 | C | 1 |
| 23 | 0.713685 | C | 1 |
| 16 | 0.551604 | C | 1 |
| 14 | 0.248869 | C | 1 |
| 6  | 0.310281 | C | 1 |
| 23 | 0.713685 | C | 1 |
| 7  | 0.748315 | C | 1 |
| 14 | 0.248869 | C | 1 |
| 5  | 0.64741  | C | 1 |
| 10 | 0.410282 | C | 1 |
| 6  | 0.440019 | C | 1 |
| 23 | 0.713685 | C | 1 |
| 10 | 0.410282 | C | 1 |
| 5  | 0.526422 | C | 1 |
| 5  | 0.291012 | C | 1 |
| 19 | 0.485767 | C | 1 |
| 4  | 0.119848 | C | 1 |
| 5  | 0.398304 | C | 1 |
| 19 | 0.485767 | C | 1 |
| 9  | 0.262196 | I | 0 |
| 5  | 0.398304 | C | 1 |
| 5  | 0.398304 | C | 1 |
| 9  | 0.262196 | I | 0 |
| 5  | 0.398304 | C | 1 |
| 5  | 0.398304 | C | 1 |
| 5  | 0.398304 | C | 1 |
| 9  | 0.262196 | I | 0 |
| 9  | 0.262196 | I | 0 |
| 5  | 0.398304 | C | 1 |
| 9  | 0.262196 | I | 0 |
| 5  | 0.291012 | C | 1 |
| 19 | 0.485767 | C | 1 |
| 5  | 0.291012 | C | 1 |
| 9  | 0.262196 | I | 0 |
| 5  | 0.291012 | C | 1 |
| 5  | 0.291012 | C | 1 |
| 5  | 0.398304 | C | 1 |
| 19 | 0.485767 | C | 1 |
| 19 | 0.485767 | C | 1 |
| 5  | 0.291012 | C | 1 |
| 4  | 0.119848 | C | 1 |
| 19 | 0.485767 | C | 1 |
| 9  | 0.262196 | I | 0 |
| 19 | 0.485767 | C | 1 |
| 9  | 0.262196 | I | 0 |
| 19 | 0.485767 | C | 1 |
| 5  | 0.291012 | C | 1 |
| 9  | 0.262196 | I | 0 |
| 4  | 0.119848 | C | 1 |
| 5  | 0.398304 | C | 1 |

|    |          |   |   |
|----|----------|---|---|
| 9  | 0.262196 | I | 0 |
| 9  | 0.262196 | I | 0 |
| 9  | 0.262196 | I | 0 |
| 19 | 0.923242 | C | 1 |
| 23 | 0.623736 | S | 0 |
| 19 | 0.923242 | C | 1 |
| 23 | 0.623736 | S | 0 |
| 23 | 0.623736 | S | 0 |
| 19 | 0.923242 | C | 1 |
| 19 | 0.923242 | C | 1 |
| 23 | 0.623736 | S | 0 |
| 23 | 0.623736 | S | 0 |
| 23 | 0.623736 | S | 0 |
| 20 | 0.490746 | D | 1 |
| 23 | 0.623736 | S | 0 |
| 20 | 0.490746 | D | 1 |
| 19 | 0.923242 | C | 1 |
| 23 | 0.623736 | S | 0 |
| 23 | 0.623736 | S | 0 |
| 23 | 0.623736 | S | 0 |
| 20 | 0.490746 | D | 1 |
| 20 | 0.490746 | D | 1 |
| 15 | 0.579662 | C | 1 |
| 22 | 0.666687 | C | 1 |
| 22 | 0.666687 | C | 1 |
| 13 | 0.717159 | C | 1 |
| 15 | 0.579662 | C | 1 |
| 9  | 0.51871  | K | 1 |
| 13 | 0.717159 | C | 1 |
| 10 | 0.208604 | C | 1 |
| 6  | 0.321056 | C | 1 |
| 6  | 0.321056 | C | 1 |
| 9  | 0.51871  | K | 1 |
| 15 | 0.579662 | C | 1 |
| 9  | 0.51871  | K | 1 |
| 22 | 0.666687 | C | 1 |
| 10 | 0.208604 | C | 1 |
| 22 | 0.666687 | C | 1 |
| 15 | 0.579662 | C | 1 |
| 10 | 0.208604 | C | 1 |
| 10 | 0.208604 | C | 1 |
| 9  | 0.51871  | K | 1 |
| 9  | 0.51871  | K | 1 |
| 22 | 0.666687 | C | 1 |
| 13 | 0.717159 | C | 1 |
| 9  | 0.51871  | K | 1 |
| 22 | 0.666687 | C | 1 |
| 13 | 0.717159 | C | 1 |
| 6  | 0.321056 | C | 1 |
| 9  | 0.51871  | K | 1 |
| 13 | 0.717159 | C | 1 |
| 22 | 0.666687 | C | 1 |
| 15 | 0.579662 | C | 1 |
| 9  | 0.51871  | K | 1 |



|    |          |   |   |
|----|----------|---|---|
| 13 | 0.717159 | C | 1 |
| 6  | 0.321056 | C | 1 |
| 9  | 0.51871  | K | 1 |
| 15 | 0.579662 | C | 1 |
| 15 | 0.579662 | C | 1 |
| 6  | 0.321056 | C | 1 |
| 13 | 0.717159 | C | 1 |
| 9  | 0.51871  | K | 1 |
| 13 | 0.717159 | C | 1 |
| 10 | 0.208604 | C | 1 |
| 13 | 0.717159 | C | 1 |
| 10 | 0.208604 | C | 1 |
| 15 | 0.579662 | C | 1 |
| 6  | 0.321056 | C | 1 |
| 9  | 0.51871  | K | 1 |
| 13 | 0.717159 | C | 1 |
| 10 | 0.208604 | C | 1 |
| 13 | 0.717159 | C | 1 |
| 6  | 0.321056 | C | 1 |
| 6  | 0.321056 | C | 1 |
| 13 | 0.717159 | C | 1 |
| 9  | 0.51871  | K | 1 |
| 15 | 0.579662 | C | 1 |
| 13 | 0.717159 | C | 1 |
| 13 | 0.717159 | C | 1 |
| 1  | 0.32908  | C | 1 |
| 1  | 0.32908  | C | 1 |
| 1  | 0.32908  | C | 1 |
| 1  | 0.32908  | C | 1 |
| 1  | 0.32908  | C | 1 |
| 14 | 0.441284 | C | 1 |
| 6  | 0.118178 | C | 1 |
| 6  | 0.118178 | C | 1 |
| 14 | 0.441284 | C | 1 |
| 14 | 0.441284 | C | 1 |
| 14 | 0.441284 | C | 1 |
| 14 | 0.441284 | C | 1 |
| 14 | 0.441284 | C | 1 |
| 14 | 0.441284 | C | 1 |
| 6  | 0.118178 | C | 1 |
| 6  | 0.118178 | C | 1 |
| 14 | 0.441284 | C | 1 |
| 14 | 0.441284 | C | 1 |
| 6  | 0.118178 | C | 1 |
| 6  | 0.118178 | C | 1 |
| 6  | 0.118178 | C | 1 |
| 17 | 0.596556 | C | 1 |
| 17 | 0.596556 | C | 1 |
| 17 | 0.596556 | C | 1 |
| 17 | 0.596556 | C | 1 |
| 17 | 0.596556 | C | 1 |
| 17 | 0.596556 | C | 1 |
| 17 | 0.596556 | C | 1 |
| 17 | 0.596556 | C | 1 |
| 12 | 0.228892 | C | 1 |

|    |          |   |   |
|----|----------|---|---|
| 12 | 0.228892 | C | 1 |
| 12 | 0.228892 | C | 1 |
| 12 | 0.228892 | C | 1 |
| 12 | 0.228892 | C | 1 |
| 12 | 0.228892 | C | 1 |
| 12 | 0.228892 | C | 1 |
| 12 | 0.228892 | C | 1 |
| 20 | 0.603509 | C | 1 |
| 20 | 0.603509 | C | 1 |
| 5  | 0.362183 | C | 1 |
| 5  | 0.362183 | C | 1 |
| 5  | 0.362183 | C | 1 |
| 5  | 0.362183 | C | 1 |
| 20 | 0.603509 | C | 1 |
| 19 | 0.363229 | C | 1 |
| 19 | 0.363229 | C | 1 |
| 5  | 0.362183 | C | 1 |
| 5  | 0.362183 | C | 1 |
| 19 | 0.363229 | C | 1 |
| 5  | 0.362183 | C | 1 |
| 20 | 0.603509 | C | 1 |
| 20 | 0.603509 | C | 1 |
| 6  | 0.694593 | C | 1 |
| 6  | 0.694593 | C | 1 |
| 18 | 0.345215 | D | 1 |
| 18 | 0.345215 | D | 1 |
| 6  | 0.694593 | C | 1 |
| 18 | 0.345215 | D | 1 |
| 18 | 0.345215 | D | 1 |
| 6  | 0.694593 | C | 1 |
| 6  | 0.694593 | C | 1 |
| 6  | 0.694593 | C | 1 |
| 6  | 0.694593 | C | 1 |
| 6  | 0.694593 | C | 1 |
| 6  | 0.694593 | C | 1 |
| 6  | 0.694593 | C | 1 |
| 18 | 0.345215 | D | 1 |
| 6  | 0.694593 | C | 1 |
| 18 | 0.345215 | D | 1 |
| 6  | 0.694593 | C | 1 |
| 6  | 0.694593 | C | 1 |
| 6  | 0.694593 | C | 1 |
| 1  | 0.272823 | C | 1 |
| 8  | 0.651229 | B | 1 |
| 8  | 0.651229 | B | 1 |
| 16 | 0.722267 | C | 1 |
| 4  | 0.621545 | G | 0 |
| 1  | 0.272823 | C | 1 |
| 16 | 0.722267 | C | 1 |
| 4  | 0.621545 | G | 0 |
| 8  | 0.651229 | B | 1 |
| 1  | 0.523042 | C | 1 |
| 1  | 0.523042 | C | 1 |
| 1  | 0.523042 | C | 1 |
| 8  | 0.651229 | B | 1 |

|    |          |   |   |
|----|----------|---|---|
| 1  | 0.523042 | C | 1 |
| 1  | 0.272823 | C | 1 |
| 16 | 0.722267 | C | 1 |
| 16 | 0.722267 | C | 1 |
| 8  | 0.651229 | B | 1 |
| 1  | 0.523042 | C | 1 |
| 16 | 0.722267 | C | 1 |
| 16 | 0.722267 | C | 1 |
| 8  | 0.651229 | B | 1 |
| 16 | 0.722267 | C | 1 |
| 4  | 0.621545 | G | 0 |
| 16 | 0.722267 | C | 1 |
| 16 | 0.722267 | C | 1 |
| 16 | 0.722267 | C | 1 |
| 16 | 0.722267 | C | 1 |
| 4  | 0.621545 | G | 0 |
| 8  | 0.651229 | B | 1 |
| 4  | 0.621545 | G | 0 |
| 8  | 0.651229 | B | 1 |
| 16 | 0.722267 | C | 1 |
| 8  | 0.651229 | B | 1 |
| 8  | 0.651229 | B | 1 |
| 8  | 0.651229 | B | 1 |
| 4  | 0.621545 | G | 0 |
| 16 | 0.722267 | C | 1 |
| 16 | 0.722267 | C | 1 |
| 8  | 0.651229 | B | 1 |
| 8  | 0.651229 | B | 1 |
| 16 | 0.722267 | C | 1 |
| 6  | 0.373742 | C | 1 |
| 6  | 0.373742 | C | 1 |
| 6  | 0.373742 | C | 1 |
| 6  | 0.373742 | C | 1 |
| 6  | 0.373742 | C | 1 |
| 6  | 0.373742 | C | 1 |
| 6  | 0.373742 | C | 1 |
| 6  | 0.373742 | C | 1 |
| 6  | 0.53297  | C | 1 |
| 6  | 0.53297  | C | 1 |
| 6  | 0.53297  | C | 1 |
| 6  | 0.53297  | C | 1 |
| 6  | 0.53297  | C | 1 |
| 6  | 0.53297  | C | 1 |
| 6  | 0.53297  | C | 1 |
| 5  | 0.748216 | C | 1 |
| 5  | 0.748216 | C | 1 |
| 14 | 0.574269 | B | 1 |
| 5  | 0.748216 | C | 1 |
| 5  | 0.748216 | C | 1 |
| 5  | 0.748216 | C | 1 |
| 5  | 0.748216 | C | 1 |
| 5  | 0.748216 | C | 1 |
| 14 | 0.574269 | B | 1 |
| 5  | 0.748216 | C | 1 |
| 5  | 0.748216 | C | 1 |

|    |          |   |   |
|----|----------|---|---|
| 5  | 0.748216 | C | 1 |
| 5  | 0.748216 | C | 1 |
| 5  | 0.748216 | C | 1 |
| 5  | 0.748216 | C | 1 |
| 14 | 0.574269 | B | 1 |
| 5  | 0.748216 | C | 1 |
| 5  | 0.748216 | C | 1 |
| 5  | 0.748216 | C | 1 |
| 14 | 0.574269 | B | 1 |
| 5  | 0.748216 | C | 1 |
| 5  | 0.748216 | C | 1 |
| 5  | 0.748216 | C | 1 |
| 5  | 0.748216 | C | 1 |
| 5  | 0.748216 | C | 1 |
| 5  | 0.748216 | C | 1 |
| 5  | 0.748216 | C | 1 |
| 5  | 0.748216 | C | 1 |
| 14 | 0.574269 | B | 1 |
| 5  | 0.748216 | C | 1 |
| 5  | 0.748216 | C | 1 |
| 5  | 0.748216 | C | 1 |
| 14 | 0.574269 | B | 1 |
| 5  | 0.748216 | C | 1 |
| 5  | 0.748216 | C | 1 |
| 5  | 0.748216 | C | 1 |
| 5  | 0.748216 | C | 1 |
| 5  | 0.748216 | C | 1 |
| 5  | 0.748216 | C | 1 |
| 5  | 0.748216 | C | 1 |
| 14 | 0.574269 | B | 1 |
| 5  | 0.748216 | C | 1 |
| 20 | 0.48053  | C | 1 |
| 20 | 0.48053  | C | 1 |
| 20 | 0.48053  | C | 1 |
| 20 | 0.48053  | C | 1 |
| 20 | 0.48053  | C | 1 |
| 20 | 0.48053  | C | 1 |
| 20 | 0.48053  | C | 1 |
| 20 | 0.48053  | C | 1 |
| 20 | 0.48053  | C | 1 |
| 20 | 0.48053  | C | 1 |
| 20 | 0.48053  | C | 1 |
| 20 | 0.48053  | C | 1 |
| 5  | 0.345713 | C | 1 |
| 17 | 0.484243 | C | 1 |
| 17 | 0.484243 | C | 1 |
| 13 | 0.421524 | I | 0 |
| 2  | 0.367971 | C | 1 |
| 7  | 0.225235 | C | 1 |
| 5  | 0.345713 | C | 1 |
| 17 | 0.484243 | C | 1 |
| 2  | 0.367971 | C | 1 |
| 7  | 0.225235 | C | 1 |
| 7  | 0.225235 | C | 1 |
| 5  | 0.345713 | C | 1 |
| 17 | 0.484243 | C | 1 |
| 5  | 0.345713 | C | 1 |

|               |   |
|---------------|---|
| 5 0.345713 C  | 1 |
| 17 0.484243 C | 1 |
| 7 0.225235 C  | 1 |
| 7 0.225235 C  | 1 |
| 17 0.484243 C | 1 |
| 17 0.484243 C | 1 |
| 13 0.421524 I | 0 |
| 5 0.345713 C  | 1 |
| 17 0.484243 C | 1 |
| 5 0.345713 C  | 1 |
| 5 0.345713 C  | 1 |
| 2 0.367971 C  | 1 |
| 5 0.345713 C  | 1 |
| 5 0.345713 C  | 1 |
| 5 0.345713 C  | 1 |
| 5 0.345713 C  | 1 |
| 17 0.484243 C | 1 |
| 17 0.484243 C | 1 |
| 5 0.345713 C  | 1 |
| 2 0.367971 C  | 1 |
| 2 0.367971 C  | 1 |
| 2 0.367971 C  | 1 |
| 5 0.345713 C  | 1 |
| 13 0.421524 I | 0 |
| 2 0.367971 C  | 1 |
| 2 0.367971 C  | 1 |
| 13 0.421524 I | 0 |
| 7 0.225235 C  | 1 |
| 7 0.225235 C  | 1 |
| 13 0.421524 I | 0 |
| 9 0.433955 C  | 1 |
| 13 0.462793 C | 1 |
| 9 0.433955 C  | 1 |
| 9 0.433955 C  | 1 |
| 9 0.433955 C  | 1 |
| 3 0.166499 C  | 1 |
| 6 0.490672 C  | 1 |
| 22 0.349612 C | 1 |
| 13 0.462793 C | 1 |
| 9 0.433955 C  | 1 |
| 9 0.433955 C  | 1 |
| 2 0.686379 C  | 1 |
| 9 0.433955 C  | 1 |
| 22 0.349612 C | 1 |
| 6 0.490672 C  | 1 |
| 1 0.318746 C  | 1 |
| 9 0.433955 C  | 1 |
| 22 0.349612 C | 1 |
| 5 0.667481 C  | 1 |
| 1 0.318746 C  | 1 |
| 1 0.338886 C  | 1 |
| 7 0.474443 C  | 1 |
| 5 0.667481 C  | 1 |
| 2 0.686379 C  | 1 |

|    |          |   |   |
|----|----------|---|---|
| 1  | 0.318746 | C | 1 |
| 13 | 0.462793 | C | 1 |
| 7  | 0.474443 | C | 1 |
| 22 | 0.349612 | C | 1 |
| 1  | 0.318746 | C | 1 |
| 1  | 0.318746 | C | 1 |
| 7  | 0.474443 | C | 1 |
| 9  | 0.433955 | C | 1 |
| 1  | 0.338886 | C | 1 |
| 2  | 0.686379 | C | 1 |
| 13 | 0.462793 | C | 1 |
| 7  | 0.474443 | C | 1 |
| 9  | 0.433955 | C | 1 |
| 3  | 0.222787 | I | 0 |
| 2  | 0.686379 | C | 1 |
| 1  | 0.338886 | C | 1 |
| 3  | 0.222787 | I | 0 |
| 9  | 0.433955 | C | 1 |
| 9  | 0.433955 | C | 1 |
| 9  | 0.433955 | C | 1 |
| 1  | 0.318746 | C | 1 |
| 1  | 0.318746 | C | 1 |
| 2  | 0.686379 | C | 1 |
| 9  | 0.433955 | C | 1 |
| 13 | 0.462793 | C | 1 |
| 9  | 0.433955 | C | 1 |
| 6  | 0.490672 | C | 1 |
| 3  | 0.222787 | I | 0 |
| 5  | 0.667481 | C | 1 |
| 13 | 0.462793 | C | 1 |
| 1  | 0.338886 | C | 1 |
| 2  | 0.686379 | C | 1 |
| 2  | 0.686379 | C | 1 |
| 22 | 0.349612 | C | 1 |
| 2  | 0.686379 | C | 1 |
| 3  | 0.222787 | I | 0 |
| 9  | 0.433955 | C | 1 |
| 13 | 0.462793 | C | 1 |
| 13 | 0.462793 | C | 1 |
| 22 | 0.349612 | C | 1 |
| 2  | 0.686379 | C | 1 |
| 7  | 0.474443 | C | 1 |
| 9  | 0.433955 | C | 1 |
| 1  | 0.318746 | C | 1 |
| 13 | 0.462793 | C | 1 |
| 2  | 0.686379 | C | 1 |
| 13 | 0.462793 | C | 1 |
| 5  | 0.667481 | C | 1 |
| 6  | 0.490672 | C | 1 |
| 7  | 0.474443 | C | 1 |
| 3  | 0.166499 | C | 1 |
| 1  | 0.318746 | C | 1 |
| 9  | 0.433955 | C | 1 |
| 5  | 0.667481 | C | 1 |

|    |          |   |   |
|----|----------|---|---|
| 3  | 0.222787 | I | 0 |
| 9  | 0.433955 | C | 1 |
| 5  | 0.667481 | C | 1 |
| 9  | 0.433955 | C | 1 |
| 6  | 0.490672 | C | 1 |
| 22 | 0.349612 | C | 1 |
| 9  | 0.433955 | C | 1 |
| 13 | 0.462793 | C | 1 |
| 1  | 0.338886 | C | 1 |
| 1  | 0.338886 | C | 1 |
| 3  | 0.166499 | C | 1 |
| 21 | 0.756078 | C | 1 |
| 21 | 0.756078 | C | 1 |
| 21 | 0.756078 | C | 1 |
| 7  | 0.402747 | C | 1 |
| 18 | 0.200491 | C | 1 |
| 7  | 0.402747 | C | 1 |
| 7  | 0.402747 | C | 1 |
| 6  | 0.412814 | C | 1 |
| 6  | 0.412814 | C | 1 |
| 7  | 0.402747 | C | 1 |
| 7  | 0.402747 | C | 1 |
| 18 | 0.200491 | C | 1 |
| 6  | 0.412814 | C | 1 |
| 6  | 0.412814 | C | 1 |
| 6  | 0.412814 | C | 1 |
| 6  | 0.412814 | C | 1 |
| 7  | 0.402747 | C | 1 |
| 7  | 0.402747 | C | 1 |
| 18 | 0.200491 | C | 1 |
| 7  | 0.402747 | C | 1 |
| 6  | 0.412814 | C | 1 |
| 7  | 0.402747 | C | 1 |
| 6  | 0.412814 | C | 1 |
| 6  | 0.412814 | C | 1 |
| 18 | 0.200491 | C | 1 |
| 18 | 0.200491 | C | 1 |
| 7  | 0.402747 | C | 1 |
| 6  | 0.412814 | C | 1 |
| 6  | 0.412814 | C | 1 |
| 6  | 0.412814 | C | 1 |
| 6  | 0.412814 | C | 1 |
| 18 | 0.200491 | C | 1 |
| 7  | 0.402747 | C | 1 |
| 18 | 0.200491 | C | 1 |
| 6  | 0.412814 | C | 1 |
| 18 | 0.200491 | C | 1 |
| 6  | 0.412814 | C | 1 |
| 7  | 0.402747 | C | 1 |
| 18 | 0.200491 | C | 1 |
| 6  | 0.412814 | C | 1 |
| 7  | 0.221809 | C | 1 |
| 7  | 0.221809 | C | 1 |
| 7  | 0.221809 | C | 1 |

|    |          |   |   |
|----|----------|---|---|
| 7  | 0.221809 | C | 1 |
| 7  | 0.221809 | C | 1 |
| 7  | 0.221809 | C | 1 |
| 7  | 0.221809 | C | 1 |
| 7  | 0.221809 | C | 1 |
| 7  | 0.221809 | C | 1 |
| 17 | 0.578814 | C | 1 |
| 17 | 0.578814 | C | 1 |
| 17 | 0.578814 | C | 1 |
| 17 | 0.578814 | C | 1 |
| 17 | 0.578814 | C | 1 |
| 17 | 0.578814 | C | 1 |
| 17 | 0.578814 | C | 1 |
| 17 | 0.578814 | C | 1 |
| 17 | 0.874337 | G | 0 |
| 17 | 0.874337 | G | 0 |
| 6  | 0.28939  | C | 1 |
| 6  | 0.28939  | C | 1 |
| 6  | 0.28939  | C | 1 |
| 6  | 0.28939  | C | 1 |
| 17 | 0.874337 | G | 0 |
| 6  | 0.28939  | C | 1 |
| 6  | 0.28939  | C | 1 |
| 6  | 0.28939  | C | 1 |
| 17 | 0.874337 | G | 0 |
| 9  | 0.55395  | C | 1 |
| 8  | 0.631751 | C | 1 |
| 10 | 0.677487 | C | 1 |
| 19 | 0.115503 | C | 1 |
| 11 | 0.655794 | C | 1 |
| 8  | 0.631751 | C | 1 |
| 10 | 0.677487 | C | 1 |
| 10 | 0.677487 | C | 1 |
| 2  | 0.320766 | B | 1 |
| 10 | 0.677487 | C | 1 |
| 6  | 0.293811 | C | 1 |
| 11 | 0.655794 | C | 1 |
| 10 | 0.677487 | C | 1 |
| 8  | 0.631751 | C | 1 |
| 10 | 0.677487 | C | 1 |
| 11 | 0.479779 | C | 1 |
| 11 | 0.655794 | C | 1 |
| 17 | 0.676845 | B | 1 |
| 11 | 0.479779 | C | 1 |
| 8  | 0.631751 | C | 1 |
| 10 | 0.677487 | C | 1 |
| 8  | 0.631751 | C | 1 |
| 15 | 0.820402 | C | 1 |
| 8  | 0.631751 | C | 1 |
| 14 | 0.552335 | C | 1 |
| 17 | 0.287802 | F | 0 |
| 17 | 0.287802 | F | 0 |
| 15 | 0.820402 | C | 1 |
| 19 | 0.115503 | C | 1 |



|                |   |
|----------------|---|
| 17 0. 676845 B | 1 |
| 19 0. 115503 C | 1 |
| 10 0. 677487 C | 1 |
| 16 0. 346556 C | 1 |
| 17 0. 676845 B | 1 |
| 8 0. 631751 C  | 1 |
| 21 0. 660171 C | 1 |
| 17 0. 676845 B | 1 |
| 15 0. 820402 C | 1 |
| 16 0. 346556 C | 1 |
| 8 0. 834191 E  | 1 |
| 8 0. 834191 E  | 1 |
| 11 0. 479779 C | 1 |
| 21 0. 660171 C | 1 |
| 8 0. 631751 C  | 1 |
| 6 0. 293811 C  | 1 |
| 11 0. 479779 C | 1 |
| 9 0. 55395 C   | 1 |
| 8 0. 834191 E  | 1 |
| 10 0. 677487 C | 1 |
| 9 0. 55395 C   | 1 |
| 10 0. 677487 C | 1 |
| 11 0. 655794 C | 1 |
| 9 0. 55395 C   | 1 |
| 11 0. 479779 C | 1 |
| 6 0. 293811 C  | 1 |
| 19 0. 115503 C | 1 |
| 19 0. 115503 C | 1 |
| 11 0. 655794 C | 1 |
| 14 0. 552335 C | 1 |
| 11 0. 655794 C | 1 |
| 9 0. 55395 C   | 1 |
| 21 0. 660171 C | 1 |
| 10 0. 677487 C | 1 |
| 6 0. 293811 C  | 1 |
| 10 0. 677487 C | 1 |
| 6 0. 293811 C  | 1 |
| 8 0. 631751 C  | 1 |
| 8 0. 834191 E  | 1 |
| 8 0. 834191 E  | 1 |
| 8 0. 631751 C  | 1 |
| 19 0. 115503 C | 1 |
| 11 0. 655794 C | 1 |
| 10 0. 677487 C | 1 |
| 6 0. 293811 C  | 1 |
| 8 0. 631751 C  | 1 |
| 6 0. 293811 C  | 1 |
| 17 0. 287802 F | 0 |
| 10 0. 677487 C | 1 |
| 11 0. 655794 C | 1 |
| 11 0. 479779 C | 1 |
| 17 0. 676845 B | 1 |
| 17 0. 676845 B | 1 |
| 10 0. 677487 C | 1 |

|    |          |   |   |
|----|----------|---|---|
| 9  | 0.55395  | C | 1 |
| 6  | 0.293811 | C | 1 |
| 14 | 0.552335 | C | 1 |
| 21 | 0.660171 | C | 1 |
| 8  | 0.631751 | C | 1 |
| 21 | 0.660171 | C | 1 |
| 17 | 0.287802 | F | 0 |
| 8  | 0.631751 | C | 1 |
| 17 | 0.287802 | F | 0 |
| 17 | 0.676845 | B | 1 |
| 17 | 0.287802 | F | 0 |
| 10 | 0.677487 | C | 1 |
| 21 | 0.660171 | C | 1 |
| 16 | 0.346556 | C | 1 |
| 8  | 0.631751 | C | 1 |
| 8  | 0.834191 | E | 1 |
| 17 | 0.287802 | F | 0 |
| 8  | 0.631751 | C | 1 |
| 2  | 0.320766 | B | 1 |
| 17 | 0.676845 | B | 1 |
| 8  | 0.834191 | E | 1 |
| 11 | 0.479779 | C | 1 |
| 8  | 0.631751 | C | 1 |
| 14 | 0.552335 | C | 1 |
| 2  | 0.320766 | B | 1 |
| 11 | 0.655794 | C | 1 |
| 9  | 0.55395  | C | 1 |
| 9  | 0.55395  | C | 1 |
| 11 | 0.655794 | C | 1 |
| 8  | 0.834191 | E | 1 |
| 6  | 0.293811 | C | 1 |
| 8  | 0.631751 | C | 1 |
| 14 | 0.552335 | C | 1 |
| 9  | 0.55395  | C | 1 |
| 10 | 0.677487 | C | 1 |
| 14 | 0.552335 | C | 1 |
| 10 | 0.677487 | C | 1 |
| 9  | 0.55395  | C | 1 |
| 21 | 0.660171 | C | 1 |
| 8  | 0.631751 | C | 1 |
| 11 | 0.479779 | C | 1 |
| 11 | 0.479779 | C | 1 |
| 11 | 0.655794 | C | 1 |
| 21 | 0.660171 | C | 1 |
| 8  | 0.631751 | C | 1 |
| 9  | 0.55395  | C | 1 |
| 17 | 0.676845 | B | 1 |
| 5  | 0.215676 | C | 1 |
| 5  | 0.215676 | C | 1 |
| 5  | 0.215676 | C | 1 |
| 5  | 0.215676 | C | 1 |
| 5  | 0.215676 | C | 1 |
| 2  | 0.319545 | A | 0 |
| 2  | 0.319545 | A | 0 |

|    |          |   |   |
|----|----------|---|---|
| 2  | 0.319545 | A | 0 |
| 2  | 0.319545 | A | 0 |
| 2  | 0.319545 | A | 0 |
| 2  | 0.319545 | A | 0 |
| 2  | 0.319545 | A | 0 |
| 2  | 0.319545 | A | 0 |
| 2  | 0.319545 | A | 0 |
| 2  | 0.319545 | A | 0 |
| 2  | 0.319545 | A | 0 |
| 2  | 0.319545 | A | 0 |
| 2  | 0.319545 | A | 0 |
| 2  | 0.319545 | A | 0 |
| 2  | 0.319545 | A | 0 |
| 2  | 0.319545 | A | 0 |
| 2  | 0.319545 | A | 0 |
| 2  | 0.319545 | A | 0 |
| 21 | 0.326182 | C | 1 |
| 21 | 0.326182 | C | 1 |
| 21 | 0.326182 | C | 1 |
| 21 | 0.326182 | C | 1 |
| 21 | 0.326182 | C | 1 |
| 21 | 0.326182 | C | 1 |
| 21 | 0.326182 | C | 1 |
| 21 | 0.326182 | C | 1 |
| 21 | 0.326182 | C | 1 |
| 21 | 0.326182 | C | 1 |
| 21 | 0.725332 | C | 1 |
| 21 | 0.725332 | C | 1 |
| 21 | 0.725332 | C | 1 |
| 11 | 0.335918 | C | 1 |
| 4  | 0.665768 | C | 1 |
| 11 | 0.525038 | C | 1 |
| 6  | 0.379893 | C | 1 |
| 5  | 0.539346 | G | 0 |
| 5  | 0.493699 | C | 1 |
| 4  | 0.665768 | C | 1 |
| 5  | 0.493699 | C | 1 |
| 17 | 0.414211 | N | 0 |
| 7  | 0.494003 | C | 1 |
| 2  | 0.505474 | F | 0 |
| 6  | 0.512199 | C | 1 |
| 11 | 0.525038 | C | 1 |
| 8  | 0.185745 | C | 1 |
| 6  | 0.379893 | C | 1 |
| 3  | 0.279863 | C | 1 |
| 17 | 0.414211 | N | 0 |
| 15 | 0.537253 | C | 1 |
| 17 | 0.563213 | C | 1 |
| 3  | 0.437724 | C | 1 |
| 8  | 0.185745 | C | 1 |
| 8  | 0.185745 | C | 1 |
| 17 | 0.414211 | N | 0 |
| 23 | 0.500873 | C | 1 |
| 2  | 0.505474 | F | 0 |

|    |          |   |   |
|----|----------|---|---|
| 3  | 0.437724 | C | 1 |
| 7  | 0.25676  | C | 1 |
| 11 | 0.335918 | C | 1 |
| 2  | 0.505474 | F | 0 |
| 8  | 0.350601 | C | 1 |
| 4  | 0.665768 | C | 1 |
| 4  | 0.665768 | C | 1 |
| 6  | 0.379893 | C | 1 |
| 5  | 0.188792 | C | 1 |
| 11 | 0.335918 | C | 1 |
| 15 | 0.537253 | C | 1 |
| 3  | 0.279863 | C | 1 |
| 15 | 0.537253 | C | 1 |
| 11 | 0.335918 | C | 1 |
| 8  | 0.350601 | C | 1 |
| 17 | 0.414211 | N | 0 |
| 4  | 0.665768 | C | 1 |
| 17 | 0.414211 | N | 0 |
| 7  | 0.25676  | C | 1 |
| 18 | 0.672004 | C | 1 |
| 17 | 0.563213 | C | 1 |
| 15 | 0.537253 | C | 1 |
| 2  | 0.537062 | C | 1 |
| 17 | 0.563213 | C | 1 |
| 6  | 0.512199 | C | 1 |
| 2  | 0.537062 | C | 1 |
| 17 | 0.414211 | N | 0 |
| 15 | 0.537253 | C | 1 |
| 5  | 0.493699 | C | 1 |
| 11 | 0.335918 | C | 1 |
| 18 | 0.672004 | C | 1 |
| 18 | 0.672004 | C | 1 |
| 8  | 0.350601 | C | 1 |
| 6  | 0.379893 | C | 1 |
| 11 | 0.525038 | C | 1 |
| 6  | 0.355672 | C | 1 |
| 18 | 0.672004 | C | 1 |
| 2  | 0.537062 | C | 1 |
| 17 | 0.567912 | D | 1 |
| 6  | 0.512199 | C | 1 |
| 6  | 0.355672 | C | 1 |
| 7  | 0.25676  | C | 1 |
| 2  | 0.086439 | C | 1 |
| 17 | 0.567912 | D | 1 |
| 8  | 0.185745 | C | 1 |
| 8  | 0.525435 | C | 1 |
| 8  | 0.350601 | C | 1 |
| 15 | 0.537253 | C | 1 |
| 4  | 0.665768 | C | 1 |
| 3  | 0.506464 | G | 0 |
| 2  | 0.505474 | F | 0 |
| 4  | 0.665768 | C | 1 |
| 6  | 0.512199 | C | 1 |
| 6  | 0.512199 | C | 1 |

|    |          |   |   |
|----|----------|---|---|
| 6  | 0.512199 | C | 1 |
| 6  | 0.512199 | C | 1 |
| 4  | 0.665768 | C | 1 |
| 6  | 0.379893 | C | 1 |
| 7  | 0.25676  | C | 1 |
| 4  | 0.665768 | C | 1 |
| 5  | 0.188792 | C | 1 |
| 17 | 0.414211 | N | 0 |
| 18 | 0.672004 | C | 1 |
| 6  | 0.379893 | C | 1 |
| 4  | 0.665768 | C | 1 |
| 7  | 0.25676  | C | 1 |
| 2  | 0.537062 | C | 1 |
| 4  | 0.665768 | C | 1 |
| 2  | 0.537062 | C | 1 |
| 5  | 0.493699 | C | 1 |
| 11 | 0.525038 | C | 1 |
| 4  | 0.665768 | C | 1 |
| 7  | 0.494003 | C | 1 |
| 5  | 0.188792 | C | 1 |
| 5  | 0.493699 | C | 1 |
| 7  | 0.25676  | C | 1 |
| 5  | 0.539346 | G | 0 |
| 7  | 0.494003 | C | 1 |
| 5  | 0.493699 | C | 1 |
| 4  | 0.665768 | C | 1 |
| 7  | 0.25676  | C | 1 |
| 6  | 0.355672 | C | 1 |
| 4  | 0.665768 | C | 1 |
| 3  | 0.279863 | C | 1 |
| 8  | 0.185745 | C | 1 |
| 17 | 0.563213 | C | 1 |
| 8  | 0.185745 | C | 1 |
| 24 | 0.15437  | C | 1 |
| 4  | 0.665768 | C | 1 |
| 5  | 0.493699 | C | 1 |
| 3  | 0.437724 | C | 1 |
| 15 | 0.537253 | C | 1 |
| 17 | 0.563213 | C | 1 |
| 4  | 0.665768 | C | 1 |
| 4  | 0.665768 | C | 1 |
| 5  | 0.188792 | C | 1 |
| 8  | 0.525435 | C | 1 |
| 6  | 0.512199 | C | 1 |
| 18 | 0.672004 | C | 1 |
| 15 | 0.537253 | C | 1 |
| 8  | 0.525435 | C | 1 |
| 24 | 0.15437  | C | 1 |
| 5  | 0.188792 | C | 1 |
| 2  | 0.505474 | F | 0 |
| 4  | 0.665768 | C | 1 |
| 3  | 0.506464 | G | 0 |
| 6  | 0.355672 | C | 1 |
| 4  | 0.665768 | C | 1 |

|    |          |   |   |
|----|----------|---|---|
| 5  | 0.539346 | G | 0 |
| 4  | 0.665768 | C | 1 |
| 5  | 0.188792 | C | 1 |
| 17 | 0.414211 | N | 0 |
| 5  | 0.188792 | C | 1 |
| 6  | 0.355672 | C | 1 |
| 3  | 0.506464 | G | 0 |
| 17 | 0.567912 | D | 1 |
| 2  | 0.086439 | C | 1 |
| 18 | 0.672004 | C | 1 |
| 18 | 0.672004 | C | 1 |
| 18 | 0.672004 | C | 1 |
| 2  | 0.086439 | C | 1 |
| 18 | 0.672004 | C | 1 |
| 7  | 0.494003 | C | 1 |
| 15 | 0.537253 | C | 1 |
| 3  | 0.437724 | C | 1 |
| 5  | 0.493699 | C | 1 |
| 17 | 0.414211 | N | 0 |
| 17 | 0.563213 | C | 1 |
| 18 | 0.672004 | C | 1 |
| 17 | 0.563213 | C | 1 |
| 17 | 0.563213 | C | 1 |
| 7  | 0.25676  | C | 1 |
| 11 | 0.335918 | C | 1 |
| 17 | 0.563213 | C | 1 |
| 18 | 0.672004 | C | 1 |
| 4  | 0.665768 | C | 1 |
| 7  | 0.25676  | C | 1 |
| 23 | 0.500873 | C | 1 |
| 5  | 0.493699 | C | 1 |
| 15 | 0.537253 | C | 1 |
| 15 | 0.537253 | C | 1 |
| 11 | 0.335918 | C | 1 |
| 15 | 0.537253 | C | 1 |
| 2  | 0.505474 | F | 0 |
| 6  | 0.355672 | C | 1 |
| 3  | 0.279863 | C | 1 |
| 6  | 0.512199 | C | 1 |
| 15 | 0.537253 | C | 1 |
| 4  | 0.665768 | C | 1 |
| 4  | 0.665768 | C | 1 |
| 6  | 0.379893 | C | 1 |
| 6  | 0.379893 | C | 1 |
| 2  | 0.505474 | F | 0 |
| 8  | 0.350601 | C | 1 |
| 17 | 0.567912 | D | 1 |
| 7  | 0.494003 | C | 1 |
| 3  | 0.437724 | C | 1 |
| 11 | 0.525038 | C | 1 |
| 24 | 0.15437  | C | 1 |
| 2  | 0.537062 | C | 1 |
| 4  | 0.665768 | C | 1 |
| 2  | 0.537062 | C | 1 |

|    |          |   |   |
|----|----------|---|---|
| 2  | 0.505474 | F | 0 |
| 3  | 0.437724 | C | 1 |
| 11 | 0.335918 | C | 1 |
| 11 | 0.335918 | C | 1 |
| 11 | 0.335918 | C | 1 |
| 11 | 0.335918 | C | 1 |
| 3  | 0.279863 | C | 1 |
| 11 | 0.335918 | C | 1 |
| 11 | 0.335918 | C | 1 |
| 17 | 0.567912 | D | 1 |
| 5  | 0.539346 | G | 0 |
| 5  | 0.539346 | G | 0 |
| 17 | 0.563213 | C | 1 |
| 11 | 0.525038 | C | 1 |
| 2  | 0.086439 | C | 1 |
| 3  | 0.437724 | C | 1 |
| 4  | 0.665768 | C | 1 |
| 3  | 0.279863 | C | 1 |
| 23 | 0.500873 | C | 1 |
| 23 | 0.500873 | C | 1 |
| 2  | 0.537062 | C | 1 |
| 3  | 0.437724 | C | 1 |
| 6  | 0.355672 | C | 1 |
| 17 | 0.567912 | D | 1 |
| 4  | 0.665768 | C | 1 |
| 11 | 0.335918 | C | 1 |
| 15 | 0.537253 | C | 1 |
| 6  | 0.355672 | C | 1 |
| 11 | 0.335918 | C | 1 |
| 11 | 0.525038 | C | 1 |
| 6  | 0.355672 | C | 1 |
| 4  | 0.665768 | C | 1 |
| 15 | 0.537253 | C | 1 |
| 5  | 0.188792 | C | 1 |
| 17 | 0.567912 | D | 1 |
| 24 | 0.15437  | C | 1 |
| 4  | 0.665768 | C | 1 |
| 18 | 0.672004 | C | 1 |
| 18 | 0.672004 | C | 1 |
| 18 | 0.672004 | C | 1 |
| 4  | 0.665768 | C | 1 |
| 4  | 0.665768 | C | 1 |
| 4  | 0.665768 | C | 1 |
| 4  | 0.665768 | C | 1 |
| 23 | 0.500873 | C | 1 |
| 3  | 0.437724 | C | 1 |
| 3  | 0.437724 | C | 1 |
| 17 | 0.563213 | C | 1 |
| 8  | 0.525435 | C | 1 |
| 6  | 0.379893 | C | 1 |
| 11 | 0.335918 | C | 1 |
| 8  | 0.185745 | C | 1 |
| 5  | 0.188792 | C | 1 |
| 2  | 0.086439 | C | 1 |

|    |          |   |   |
|----|----------|---|---|
| 5  | 0.188792 | C | 1 |
| 3  | 0.506464 | G | 0 |
| 6  | 0.355672 | C | 1 |
| 4  | 0.665768 | C | 1 |
| 17 | 0.414211 | N | 0 |
| 17 | 0.563213 | C | 1 |
| 4  | 0.665768 | C | 1 |
| 4  | 0.665768 | C | 1 |
| 8  | 0.525435 | C | 1 |
| 6  | 0.355672 | C | 1 |
| 6  | 0.379893 | C | 1 |
| 4  | 0.665768 | C | 1 |
| 11 | 0.525038 | C | 1 |
| 4  | 0.665768 | C | 1 |
| 5  | 0.493699 | C | 1 |
| 17 | 0.567912 | D | 1 |
| 23 | 0.500873 | C | 1 |
| 8  | 0.185745 | C | 1 |
| 7  | 0.25676  | C | 1 |
| 11 | 0.525038 | C | 1 |
| 4  | 0.665768 | C | 1 |
| 24 | 0.15437  | C | 1 |
| 4  | 0.665768 | C | 1 |
| 4  | 0.665768 | C | 1 |
| 2  | 0.537062 | C | 1 |
| 4  | 0.665768 | C | 1 |
| 4  | 0.665768 | C | 1 |
| 18 | 0.672004 | C | 1 |
| 18 | 0.672004 | C | 1 |
| 8  | 0.185745 | C | 1 |
| 3  | 0.437724 | C | 1 |
| 18 | 0.672004 | C | 1 |
| 6  | 0.512199 | C | 1 |
| 17 | 0.414211 | N | 0 |
| 24 | 0.15437  | C | 1 |
| 5  | 0.493699 | C | 1 |
| 17 | 0.563213 | C | 1 |
| 17 | 0.563213 | C | 1 |
| 3  | 0.279863 | C | 1 |
| 24 | 0.15437  | C | 1 |
| 11 | 0.335918 | C | 1 |
| 11 | 0.335918 | C | 1 |
| 4  | 0.665768 | C | 1 |
| 11 | 0.525038 | C | 1 |
| 18 | 0.672004 | C | 1 |
| 4  | 0.665768 | C | 1 |
| 23 | 0.500873 | C | 1 |
| 4  | 0.665768 | C | 1 |
| 4  | 0.665768 | C | 1 |
| 6  | 0.355672 | C | 1 |
| 6  | 0.512199 | C | 1 |
| 4  | 0.665768 | C | 1 |
| 4  | 0.665768 | C | 1 |
| 5  | 0.493699 | C | 1 |



|    |          |   |   |
|----|----------|---|---|
| 4  | 0.665768 | C | 1 |
| 3  | 0.437724 | C | 1 |
| 3  | 0.279863 | C | 1 |
| 18 | 0.434551 | C | 1 |
| 18 | 0.434551 | C | 1 |
| 18 | 0.434551 | C | 1 |
| 18 | 0.434551 | C | 1 |
| 2  | 0.299499 | C | 1 |
| 15 | 0.656418 | E | 1 |
| 15 | 0.656418 | E | 1 |
| 15 | 0.656418 | E | 1 |
| 15 | 0.656418 | E | 1 |
| 15 | 0.656418 | E | 1 |
| 15 | 0.656418 | E | 1 |
| 15 | 0.656418 | E | 1 |
| 15 | 0.656418 | E | 1 |
| 15 | 0.656418 | E | 1 |
| 15 | 0.656418 | E | 1 |
| 2  | 0.299499 | C | 1 |
| 15 | 0.656418 | E | 1 |
| 15 | 0.656418 | E | 1 |
| 15 | 0.656418 | E | 1 |
| 2  | 0.299499 | C | 1 |
| 15 | 0.656418 | E | 1 |
| 15 | 0.656418 | E | 1 |
| 2  | 0.299499 | C | 1 |
| 2  | 0.299499 | C | 1 |
| 15 | 0.656418 | E | 1 |
| 15 | 0.656418 | E | 1 |
| 2  | 0.299499 | C | 1 |
| 2  | 0.299499 | C | 1 |
| 16 | 0.448381 | B | 1 |
| 16 | 0.448381 | B | 1 |
| 16 | 0.448381 | B | 1 |
| 16 | 0.448381 | B | 1 |
| 16 | 0.448381 | B | 1 |
| 20 | 0.444176 | C | 1 |
| 20 | 0.444176 | C | 1 |
| 20 | 0.444176 | C | 1 |
| 6  | 0.248864 | C | 1 |
| 20 | 0.483106 | C | 1 |
| 20 | 0.483106 | C | 1 |
| 17 | 0.533256 | C | 1 |
| 6  | 0.248864 | C | 1 |
| 17 | 0.533256 | C | 1 |
| 17 | 0.533256 | C | 1 |
| 16 | 0.662191 | C | 1 |
| 20 | 0.483106 | C | 1 |
| 13 | 0.567094 | C | 1 |
| 20 | 0.483106 | C | 1 |
| 20 | 0.483106 | C | 1 |
| 20 | 0.483106 | C | 1 |
| 13 | 0.567094 | C | 1 |

|    |          |   |   |
|----|----------|---|---|
| 20 | 0.483106 | C | 1 |
| 20 | 0.483106 | C | 1 |
| 20 | 0.483106 | C | 1 |
| 13 | 0.567094 | C | 1 |
| 20 | 0.483106 | C | 1 |
| 16 | 0.662191 | C | 1 |
| 20 | 0.483106 | C | 1 |
| 20 | 0.483106 | C | 1 |
| 20 | 0.483106 | C | 1 |
| 20 | 0.483106 | C | 1 |
| 20 | 0.483106 | C | 1 |
| 16 | 0.662191 | C | 1 |
| 6  | 0.248864 | C | 1 |
| 20 | 0.483106 | C | 1 |
| 20 | 0.483106 | C | 1 |
| 20 | 0.483106 | C | 1 |
| 13 | 0.567094 | C | 1 |
| 20 | 0.483106 | C | 1 |
| 13 | 0.567094 | C | 1 |
| 16 | 0.662191 | C | 1 |
| 20 | 0.483106 | C | 1 |
| 20 | 0.483106 | C | 1 |
| 20 | 0.483106 | C | 1 |
| 20 | 0.483106 | C | 1 |
| 16 | 0.662191 | C | 1 |
| 13 | 0.567094 | C | 1 |
| 20 | 0.483106 | C | 1 |
| 20 | 0.483106 | C | 1 |
| 14 | 0.151366 | F | 0 |
| 19 | 0.352813 | C | 1 |
| 2  | 0.38499  | I | 0 |
| 14 | 0.151366 | F | 0 |
| 14 | 0.151366 | F | 0 |
| 19 | 0.352813 | C | 1 |
| 2  | 0.38499  | I | 0 |
| 19 | 0.352813 | C | 1 |
| 2  | 0.38499  | I | 0 |
| 19 | 0.352813 | C | 1 |
| 2  | 0.38499  | I | 0 |
| 19 | 0.352813 | C | 1 |
| 19 | 0.352813 | C | 1 |
| 19 | 0.352813 | C | 1 |
| 2  | 0.38499  | I | 0 |
| 2  | 0.38499  | I | 0 |
| 19 | 0.352813 | C | 1 |
| 2  | 0.38499  | I | 0 |
| 19 | 0.352813 | C | 1 |
| 19 | 0.352813 | C | 1 |
| 2  | 0.38499  | I | 0 |
| 6  | 0.641447 | C | 1 |
| 6  | 0.641447 | C | 1 |
| 6  | 0.641447 | C | 1 |
| 6  | 0.641447 | C | 1 |

|    |          |   |   |
|----|----------|---|---|
| 6  | 0.641447 | C | 1 |
| 6  | 0.641447 | C | 1 |
| 6  | 0.641447 | C | 1 |
| 6  | 0.641447 | C | 1 |
| 6  | 0.641447 | C | 1 |
| 6  | 0.641447 | C | 1 |
| 6  | 0.641447 | C | 1 |
| 6  | 0.641447 | C | 1 |
| 14 | 0.540143 | I | 0 |
| 3  | 0.529768 | C | 1 |
| 11 | 0.593373 | C | 1 |
| 11 | 0.593373 | C | 1 |
| 5  | 0.314349 | I | 0 |
| 10 | 0.582907 | C | 1 |
| 8  | 0.247986 | I | 0 |
| 21 | 0.799907 | F | 0 |
| 3  | 0.457231 | C | 1 |
| 5  | 0.432909 | C | 1 |
| 3  | 0.457231 | C | 1 |
| 24 | 0.642512 | C | 1 |
| 24 | 0.642512 | C | 1 |
| 8  | 0.247986 | I | 0 |
| 7  | 0.142944 | C | 1 |
| 12 | 0.732624 | E | 1 |
| 24 | 0.667929 | F | 0 |
| 18 | 0.701738 | C | 1 |
| 3  | 0.719698 | C | 1 |
| 6  | 0.227716 | I | 0 |
| 11 | 0.593373 | C | 1 |
| 18 | 0.701738 | C | 1 |
| 21 | 0.799907 | F | 0 |
| 18 | 0.701738 | C | 1 |
| 18 | 0.208222 | C | 1 |
| 24 | 0.667929 | F | 0 |
| 1  | 0.328956 | C | 1 |
| 21 | 0.377062 | C | 1 |
| 12 | 0.732624 | E | 1 |
| 12 | 0.732624 | E | 1 |
| 2  | 0.495562 | C | 1 |
| 24 | 0.642512 | C | 1 |
| 11 | 0.677757 | C | 1 |
| 16 | 0.488209 | C | 1 |
| 6  | 0.119053 | C | 1 |
| 21 | 0.369581 | C | 1 |
| 24 | 0.642512 | C | 1 |
| 3  | 0.719698 | C | 1 |
| 5  | 0.432909 | C | 1 |
| 11 | 0.677757 | C | 1 |
| 2  | 0.14292  | C | 1 |
| 21 | 0.369581 | C | 1 |
| 20 | 0.456457 | C | 1 |
| 2  | 0.14292  | C | 1 |
| 16 | 0.488209 | C | 1 |
| 11 | 0.593373 | C | 1 |

|    |          |   |   |
|----|----------|---|---|
| 10 | 0.457836 | C | 1 |
| 14 | 0.540143 | I | 0 |
| 2  | 0.495562 | C | 1 |
| 21 | 0.369581 | C | 1 |
| 3  | 0.457231 | C | 1 |
| 11 | 0.593373 | C | 1 |
| 7  | 0.142944 | C | 1 |
| 18 | 0.701738 | C | 1 |
| 5  | 0.314349 | I | 0 |
| 11 | 0.593373 | C | 1 |
| 5  | 0.635307 | M | 0 |
| 11 | 0.677757 | C | 1 |
| 6  | 0.384173 | N | 0 |
| 5  | 0.635307 | M | 0 |
| 12 | 0.732624 | E | 1 |
| 2  | 0.317539 | I | 0 |
| 6  | 0.119053 | C | 1 |
| 1  | 0.288731 | C | 1 |
| 6  | 0.119053 | C | 1 |
| 8  | 0.247986 | I | 0 |
| 6  | 0.384173 | N | 0 |
| 16 | 0.488209 | C | 1 |
| 12 | 0.732624 | E | 1 |
| 5  | 0.314349 | I | 0 |
| 18 | 0.701738 | C | 1 |
| 18 | 0.701738 | C | 1 |
| 11 | 0.677757 | C | 1 |
| 1  | 0.414295 | C | 1 |
| 3  | 0.457231 | C | 1 |
| 11 | 0.593373 | C | 1 |
| 11 | 0.677757 | C | 1 |
| 11 | 0.677757 | C | 1 |
| 5  | 0.635307 | M | 0 |
| 1  | 0.328956 | C | 1 |
| 20 | 0.456457 | C | 1 |
| 21 | 0.369581 | C | 1 |
| 10 | 0.457836 | C | 1 |
| 18 | 0.701738 | C | 1 |
| 6  | 0.384173 | N | 0 |
| 12 | 0.732624 | E | 1 |
| 11 | 0.593373 | C | 1 |
| 13 | 0.468277 | F | 0 |
| 5  | 0.635307 | M | 0 |
| 2  | 0.258595 | G | 0 |
| 5  | 0.635307 | M | 0 |
| 20 | 0.456457 | C | 1 |
| 14 | 0.540143 | I | 0 |
| 6  | 0.227716 | I | 0 |
| 7  | 0.142944 | C | 1 |
| 20 | 0.456457 | C | 1 |
| 14 | 0.334505 | C | 1 |
| 14 | 0.540143 | I | 0 |
| 1  | 0.288731 | C | 1 |
| 2  | 0.495562 | C | 1 |

|    |          |   |   |
|----|----------|---|---|
| 11 | 0.677757 | C | 1 |
| 6  | 0.227716 | I | 0 |
| 1  | 0.414295 | C | 1 |
| 21 | 0.377062 | C | 1 |
| 18 | 0.701738 | C | 1 |
| 10 | 0.582907 | C | 1 |
| 1  | 0.288731 | C | 1 |
| 11 | 0.677757 | C | 1 |
| 16 | 0.488209 | C | 1 |
| 6  | 0.384173 | N | 0 |
| 2  | 0.258595 | G | 0 |
| 3  | 0.457231 | C | 1 |
| 2  | 0.495562 | C | 1 |
| 11 | 0.677757 | C | 1 |
| 2  | 0.495562 | C | 1 |
| 12 | 0.732624 | E | 1 |
| 3  | 0.586505 | M | 0 |
| 14 | 0.540143 | I | 0 |
| 2  | 0.14292  | C | 1 |
| 12 | 0.732624 | E | 1 |
| 5  | 0.635307 | M | 0 |
| 14 | 0.540143 | I | 0 |
| 5  | 0.314349 | I | 0 |
| 24 | 0.642512 | C | 1 |
| 10 | 0.582907 | C | 1 |
| 3  | 0.586505 | M | 0 |
| 18 | 0.208222 | C | 1 |
| 5  | 0.432909 | C | 1 |
| 1  | 0.288731 | C | 1 |
| 21 | 0.799907 | F | 0 |
| 11 | 0.593373 | C | 1 |
| 7  | 0.142944 | C | 1 |
| 20 | 0.456457 | C | 1 |
| 13 | 0.468277 | F | 0 |
| 2  | 0.14292  | C | 1 |
| 5  | 0.314349 | I | 0 |
| 18 | 0.208222 | C | 1 |
| 7  | 0.767775 | G | 0 |
| 10 | 0.582907 | C | 1 |
| 14 | 0.334505 | C | 1 |
| 10 | 0.582907 | C | 1 |
| 18 | 0.208222 | C | 1 |
| 14 | 0.334505 | C | 1 |
| 7  | 0.142944 | C | 1 |
| 6  | 0.384173 | N | 0 |
| 8  | 0.247986 | I | 0 |
| 5  | 0.635307 | M | 0 |
| 21 | 0.369581 | C | 1 |
| 3  | 0.457231 | C | 1 |
| 7  | 0.142944 | C | 1 |
| 24 | 0.642512 | C | 1 |
| 5  | 0.314349 | I | 0 |
| 1  | 0.328956 | C | 1 |
| 11 | 0.593373 | C | 1 |

|    |          |   |   |
|----|----------|---|---|
| 18 | 0.701738 | C | 1 |
| 10 | 0.582907 | C | 1 |
| 24 | 0.642512 | C | 1 |
| 14 | 0.334505 | C | 1 |
| 12 | 0.732624 | E | 1 |
| 2  | 0.14292  | C | 1 |
| 11 | 0.593373 | C | 1 |
| 18 | 0.701738 | C | 1 |
| 12 | 0.732624 | E | 1 |
| 3  | 0.457231 | C | 1 |
| 3  | 0.457231 | C | 1 |
| 14 | 0.540143 | I | 0 |
| 21 | 0.377062 | C | 1 |
| 1  | 0.192447 | F | 0 |
| 10 | 0.457836 | C | 1 |
| 2  | 0.258595 | G | 0 |
| 14 | 0.334505 | C | 1 |
| 3  | 0.586505 | M | 0 |
| 18 | 0.701738 | C | 1 |
| 16 | 0.488209 | C | 1 |
| 3  | 0.586505 | M | 0 |
| 24 | 0.667929 | F | 0 |
| 12 | 0.732624 | E | 1 |
| 5  | 0.635307 | M | 0 |
| 6  | 0.119053 | C | 1 |
| 3  | 0.457231 | C | 1 |
| 10 | 0.457836 | C | 1 |
| 14 | 0.540143 | I | 0 |
| 10 | 0.582907 | C | 1 |
| 8  | 0.247986 | I | 0 |
| 6  | 0.384173 | N | 0 |
| 20 | 0.456457 | C | 1 |
| 3  | 0.586505 | M | 0 |
| 3  | 0.529768 | C | 1 |
| 3  | 0.586505 | M | 0 |
| 18 | 0.701738 | C | 1 |
| 18 | 0.701738 | C | 1 |
| 5  | 0.432909 | C | 1 |
| 2  | 0.495562 | C | 1 |
| 6  | 0.119053 | C | 1 |
| 20 | 0.456457 | C | 1 |
| 2  | 0.495562 | C | 1 |
| 16 | 0.488209 | C | 1 |
| 14 | 0.540143 | I | 0 |
| 11 | 0.677757 | C | 1 |
| 16 | 0.488209 | C | 1 |
| 16 | 0.488209 | C | 1 |
| 16 | 0.488209 | C | 1 |
| 13 | 0.468277 | F | 0 |
| 1  | 0.288731 | C | 1 |
| 18 | 0.701738 | C | 1 |
| 10 | 0.582907 | C | 1 |
| 12 | 0.732624 | E | 1 |
| 2  | 0.495562 | C | 1 |

|    |          |   |   |
|----|----------|---|---|
| 1  | 0.288731 | C | 1 |
| 5  | 0.314349 | I | 0 |
| 21 | 0.369581 | C | 1 |
| 5  | 0.635307 | M | 0 |
| 11 | 0.677757 | C | 1 |
| 2  | 0.258595 | G | 0 |
| 18 | 0.701738 | C | 1 |
| 11 | 0.593373 | C | 1 |
| 21 | 0.369581 | C | 1 |
| 3  | 0.586505 | M | 0 |
| 5  | 0.635307 | M | 0 |
| 16 | 0.488209 | C | 1 |
| 6  | 0.384173 | N | 0 |
| 16 | 0.488209 | C | 1 |
| 3  | 0.719698 | C | 1 |
| 10 | 0.457836 | C | 1 |
| 14 | 0.540143 | I | 0 |
| 21 | 0.377062 | C | 1 |
| 2  | 0.317539 | I | 0 |
| 12 | 0.732624 | E | 1 |
| 12 | 0.732624 | E | 1 |
| 21 | 0.369581 | C | 1 |
| 3  | 0.457231 | C | 1 |
| 21 | 0.369581 | C | 1 |
| 7  | 0.767775 | G | 0 |
| 3  | 0.457231 | C | 1 |
| 10 | 0.582907 | C | 1 |
| 6  | 0.227716 | I | 0 |
| 2  | 0.495562 | C | 1 |
| 8  | 0.247986 | I | 0 |
| 20 | 0.456457 | C | 1 |
| 11 | 0.677757 | C | 1 |
| 1  | 0.192447 | F | 0 |
| 20 | 0.456457 | C | 1 |
| 5  | 0.314349 | I | 0 |
| 20 | 0.456457 | C | 1 |
| 3  | 0.457231 | C | 1 |
| 3  | 0.586505 | M | 0 |
| 3  | 0.457231 | C | 1 |
| 11 | 0.677757 | C | 1 |
| 3  | 0.457231 | C | 1 |
| 20 | 0.456457 | C | 1 |
| 21 | 0.799907 | F | 0 |
| 5  | 0.635307 | M | 0 |
| 21 | 0.799907 | F | 0 |
| 5  | 0.635307 | M | 0 |
| 10 | 0.457836 | C | 1 |
| 2  | 0.317539 | I | 0 |
| 7  | 0.767775 | G | 0 |
| 2  | 0.495562 | C | 1 |
| 14 | 0.540143 | I | 0 |
| 18 | 0.701738 | C | 1 |
| 6  | 0.227716 | I | 0 |
| 21 | 0.369581 | C | 1 |

|    |          |   |   |
|----|----------|---|---|
| 6  | 0.227716 | I | 0 |
| 2  | 0.317539 | I | 0 |
| 11 | 0.677757 | C | 1 |
| 1  | 0.288731 | C | 1 |
| 14 | 0.540143 | I | 0 |
| 13 | 0.468277 | F | 0 |
| 6  | 0.227716 | I | 0 |
| 6  | 0.227716 | I | 0 |
| 20 | 0.456457 | C | 1 |
| 14 | 0.540143 | I | 0 |
| 6  | 0.227716 | I | 0 |
| 18 | 0.701738 | C | 1 |
| 2  | 0.317539 | I | 0 |
| 2  | 0.14292  | C | 1 |
| 18 | 0.701738 | C | 1 |
| 5  | 0.635307 | M | 0 |
| 20 | 0.456457 | C | 1 |
| 6  | 0.119053 | C | 1 |
| 6  | 0.119053 | C | 1 |
| 6  | 0.384173 | N | 0 |
| 6  | 0.119053 | C | 1 |
| 18 | 0.701738 | C | 1 |
| 2  | 0.258595 | G | 0 |
| 6  | 0.119053 | C | 1 |
| 6  | 0.119053 | C | 1 |
| 21 | 0.369581 | C | 1 |
| 14 | 0.540143 | I | 0 |
| 6  | 0.119053 | C | 1 |
| 6  | 0.119053 | C | 1 |
| 20 | 0.456457 | C | 1 |
| 12 | 0.732624 | E | 1 |
| 24 | 0.642512 | C | 1 |
| 14 | 0.540143 | I | 0 |
| 11 | 0.593373 | C | 1 |
| 10 | 0.582907 | C | 1 |
| 14 | 0.540143 | I | 0 |
| 1  | 0.192447 | F | 0 |
| 14 | 0.540143 | I | 0 |
| 14 | 0.540143 | I | 0 |
| 10 | 0.457836 | C | 1 |
| 5  | 0.635307 | M | 0 |
| 8  | 0.247986 | I | 0 |
| 18 | 0.701738 | C | 1 |
| 2  | 0.495562 | C | 1 |
| 5  | 0.432909 | C | 1 |
| 3  | 0.586505 | M | 0 |
| 16 | 0.488209 | C | 1 |
| 11 | 0.593373 | C | 1 |
| 14 | 0.540143 | I | 0 |
| 3  | 0.586505 | M | 0 |
| 5  | 0.635307 | M | 0 |
| 13 | 0.468277 | F | 0 |
| 1  | 0.414295 | C | 1 |
| 13 | 0.468277 | F | 0 |



|    |          |   |   |
|----|----------|---|---|
| 10 | 0.582907 | C | 1 |
| 8  | 0.247986 | I | 0 |
| 6  | 0.384173 | N | 0 |
| 1  | 0.192447 | F | 0 |
| 6  | 0.384173 | N | 0 |
| 6  | 0.384173 | N | 0 |
| 11 | 0.677757 | C | 1 |
| 3  | 0.586505 | M | 0 |
| 11 | 0.593373 | C | 1 |
| 3  | 0.529768 | C | 1 |
| 18 | 0.701738 | C | 1 |
| 12 | 0.732624 | E | 1 |
| 18 | 0.701738 | C | 1 |
| 12 | 0.732624 | E | 1 |
| 14 | 0.540143 | I | 0 |
| 14 | 0.540143 | I | 0 |
| 6  | 0.119053 | C | 1 |
| 6  | 0.227716 | I | 0 |
| 1  | 0.192447 | F | 0 |
| 11 | 0.593373 | C | 1 |
| 12 | 0.732624 | E | 1 |
| 18 | 0.208222 | C | 1 |
| 5  | 0.432909 | C | 1 |
| 12 | 0.732624 | E | 1 |
| 16 | 0.488209 | C | 1 |
| 20 | 0.456457 | C | 1 |
| 12 | 0.732624 | E | 1 |
| 5  | 0.635307 | M | 0 |
| 12 | 0.732624 | E | 1 |
| 18 | 0.701738 | C | 1 |
| 18 | 0.701738 | C | 1 |
| 3  | 0.457231 | C | 1 |
| 2  | 0.14292  | C | 1 |
| 6  | 0.384173 | N | 0 |
| 1  | 0.288731 | C | 1 |
| 1  | 0.414295 | C | 1 |
| 24 | 0.642512 | C | 1 |
| 3  | 0.719698 | C | 1 |
| 11 | 0.593373 | C | 1 |
| 1  | 0.414295 | C | 1 |
| 5  | 0.635307 | M | 0 |
| 10 | 0.457836 | C | 1 |
| 3  | 0.719698 | C | 1 |
| 20 | 0.456457 | C | 1 |
| 8  | 0.247986 | I | 0 |
| 16 | 0.488209 | C | 1 |
| 14 | 0.334505 | C | 1 |
| 5  | 0.635307 | M | 0 |
| 11 | 0.677757 | C | 1 |
| 2  | 0.317539 | I | 0 |
| 14 | 0.540143 | I | 0 |
| 6  | 0.119053 | C | 1 |
| 20 | 0.456457 | C | 1 |
| 2  | 0.317539 | I | 0 |

|    |          |   |   |
|----|----------|---|---|
| 24 | 0.642512 | C | 1 |
| 21 | 0.377062 | C | 1 |
| 12 | 0.732624 | E | 1 |
| 5  | 0.635307 | M | 0 |
| 14 | 0.334505 | C | 1 |
| 5  | 0.432909 | C | 1 |
| 24 | 0.642512 | C | 1 |
| 5  | 0.635307 | M | 0 |
| 1  | 0.328956 | C | 1 |
| 18 | 0.701738 | C | 1 |
| 5  | 0.432909 | C | 1 |
| 14 | 0.540143 | I | 0 |
| 2  | 0.669972 | N | 0 |
| 6  | 0.178595 | C | 1 |
| 7  | 0.47622  | C | 1 |
| 17 | 0.592619 | D | 1 |
| 6  | 0.178595 | C | 1 |
| 2  | 0.669972 | N | 0 |
| 7  | 0.47622  | C | 1 |
| 6  | 0.170245 | C | 1 |
| 2  | 0.669972 | N | 0 |
| 17 | 0.592619 | D | 1 |
| 18 | 0.808403 | C | 1 |
| 1  | 0.504876 | I | 0 |
| 1  | 0.504876 | I | 0 |
| 2  | 0.669972 | N | 0 |
| 7  | 0.47622  | C | 1 |
| 6  | 0.178595 | C | 1 |
| 5  | 0.357314 | A | 0 |
| 17 | 0.592619 | D | 1 |
| 7  | 0.47622  | C | 1 |
| 5  | 0.357314 | A | 0 |
| 2  | 0.669972 | N | 0 |
| 2  | 0.669972 | N | 0 |
| 5  | 0.357314 | A | 0 |
| 5  | 0.357314 | A | 0 |
| 7  | 0.47622  | C | 1 |
| 7  | 0.47622  | C | 1 |
| 7  | 0.47622  | C | 1 |
| 2  | 0.669972 | N | 0 |
| 18 | 0.808403 | C | 1 |
| 6  | 0.170245 | C | 1 |
| 17 | 0.592619 | D | 1 |
| 1  | 0.504876 | I | 0 |
| 6  | 0.170245 | C | 1 |
| 7  | 0.47622  | C | 1 |
| 17 | 0.592619 | D | 1 |
| 7  | 0.47622  | C | 1 |
| 7  | 0.47622  | C | 1 |
| 5  | 0.357314 | A | 0 |
| 7  | 0.47622  | C | 1 |
| 2  | 0.669972 | N | 0 |
| 17 | 0.592619 | D | 1 |
| 5  | 0.357314 | A | 0 |

|               |   |
|---------------|---|
| 6 0.178595 C  | 1 |
| 6 0.170245 C  | 1 |
| 17 0.592619 D | 1 |
| 18 0.808403 C | 1 |
| 6 0.178595 C  | 1 |
| 18 0.808403 C | 1 |
| 6 0.170245 C  | 1 |
| 6 0.178595 C  | 1 |
| 5 0.357314 A  | 0 |
| 17 0.592619 D | 1 |
| 5 0.357314 A  | 0 |
| 6 0.170245 C  | 1 |
| 18 0.808403 C | 1 |
| 17 0.592619 D | 1 |
| 17 0.592619 D | 1 |
| 17 0.592619 D | 1 |
| 7 0.47622 C   | 1 |
| 17 0.592619 D | 1 |
| 18 0.808403 C | 1 |
| 17 0.592619 D | 1 |
| 6 0.497505 C  | 1 |
| 13 0.437651 D | 1 |
| 13 0.437651 D | 1 |
| 6 0.497505 C  | 1 |
| 8 0.569374 C  | 1 |
| 8 0.504493 A  | 0 |
| 8 0.504493 A  | 0 |
| 13 0.437651 D | 1 |
| 7 0.234788 C  | 1 |
| 7 0.234788 C  | 1 |
| 6 0.497505 C  | 1 |
| 8 0.504493 A  | 0 |
| 8 0.569374 C  | 1 |
| 6 0.497505 C  | 1 |
| 8 0.569374 C  | 1 |
| 8 0.569374 C  | 1 |
| 13 0.437651 D | 1 |
| 6 0.497505 C  | 1 |
| 8 0.569374 C  | 1 |
| 6 0.497505 C  | 1 |
| 6 0.497505 C  | 1 |
| 13 0.437651 D | 1 |
| 8 0.504493 A  | 0 |
| 6 0.497505 C  | 1 |
| 8 0.569374 C  | 1 |
| 8 0.504493 A  | 0 |
| 13 0.437651 D | 1 |
| 6 0.497505 C  | 1 |
| 13 0.437651 D | 1 |
| 13 0.437651 D | 1 |
| 8 0.569374 C  | 1 |
| 7 0.234788 C  | 1 |
| 13 0.437651 D | 1 |
| 8 0.504493 A  | 0 |

|    |          |   |   |
|----|----------|---|---|
| 15 | 0.630888 | C | 1 |
| 19 | 0.66705  | C | 1 |
| 21 | 0.166758 | C | 1 |
| 24 | 0.52348  | C | 1 |
| 16 | 0.409554 | C | 1 |
| 21 | 0.166758 | C | 1 |
| 10 | 0.596666 | C | 1 |
| 10 | 0.596666 | C | 1 |
| 16 | 0.409554 | C | 1 |
| 15 | 0.630888 | C | 1 |
| 21 | 0.13339  | C | 1 |
| 21 | 0.13339  | C | 1 |
| 17 | 0.235712 | C | 1 |
| 10 | 0.596666 | C | 1 |
| 17 | 0.235712 | C | 1 |
| 15 | 0.630888 | C | 1 |
| 13 | 0.575749 | C | 1 |
| 15 | 0.630888 | C | 1 |
| 17 | 0.484372 | C | 1 |
| 13 | 0.575749 | C | 1 |
| 24 | 0.52348  | C | 1 |
| 6  | 0.130321 | C | 1 |
| 17 | 0.529835 | G | 0 |
| 13 | 0.575749 | C | 1 |
| 21 | 0.13339  | C | 1 |
| 17 | 0.235712 | C | 1 |
| 6  | 0.130321 | C | 1 |
| 1  | 0.256616 | C | 1 |
| 13 | 0.575749 | C | 1 |
| 13 | 0.575749 | C | 1 |
| 17 | 0.529835 | G | 0 |
| 21 | 0.166758 | C | 1 |
| 15 | 0.630888 | C | 1 |
| 17 | 0.235712 | C | 1 |
| 15 | 0.630888 | C | 1 |
| 1  | 0.256616 | C | 1 |
| 17 | 0.484372 | C | 1 |
| 15 | 0.630888 | C | 1 |
| 15 | 0.630888 | C | 1 |
| 15 | 0.630888 | C | 1 |
| 16 | 0.409554 | C | 1 |
| 1  | 0.256616 | C | 1 |
| 10 | 0.596666 | C | 1 |
| 1  | 0.256616 | C | 1 |
| 15 | 0.630888 | C | 1 |
| 13 | 0.578831 | D | 1 |
| 17 | 0.529835 | G | 0 |
| 13 | 0.575749 | C | 1 |
| 10 | 0.596666 | C | 1 |
| 17 | 0.484372 | C | 1 |
| 16 | 0.409554 | C | 1 |
| 17 | 0.235712 | C | 1 |
| 10 | 0.596666 | C | 1 |
| 13 | 0.578831 | D | 1 |

|    |          |   |   |
|----|----------|---|---|
| 15 | 0.630888 | C | 1 |
| 15 | 0.630888 | C | 1 |
| 19 | 0.66705  | C | 1 |
| 15 | 0.630888 | C | 1 |
| 6  | 0.130321 | C | 1 |
| 13 | 0.575749 | C | 1 |
| 15 | 0.630888 | C | 1 |
| 10 | 0.596666 | C | 1 |
| 15 | 0.630888 | C | 1 |
| 15 | 0.630888 | C | 1 |
| 17 | 0.484372 | C | 1 |
| 13 | 0.575749 | C | 1 |
| 16 | 0.409554 | C | 1 |
| 6  | 0.130321 | C | 1 |
| 1  | 0.256616 | C | 1 |
| 1  | 0.256616 | C | 1 |
| 10 | 0.596666 | C | 1 |
| 16 | 0.409554 | C | 1 |
| 13 | 0.578831 | D | 1 |
| 21 | 0.166758 | C | 1 |
| 16 | 0.409554 | C | 1 |
| 16 | 0.409554 | C | 1 |
| 10 | 0.596666 | C | 1 |
| 16 | 0.409554 | C | 1 |
| 21 | 0.166758 | C | 1 |
| 1  | 0.256616 | C | 1 |
| 13 | 0.575749 | C | 1 |
| 21 | 0.13339  | C | 1 |
| 16 | 0.409554 | C | 1 |
| 21 | 0.13339  | C | 1 |
| 16 | 0.409554 | C | 1 |
| 2  | 0.132322 | C | 1 |
| 24 | 0.52348  | C | 1 |
| 19 | 0.66705  | C | 1 |
| 6  | 0.130321 | C | 1 |
| 6  | 0.130321 | C | 1 |
| 10 | 0.596666 | C | 1 |
| 15 | 0.630888 | C | 1 |
| 15 | 0.630888 | C | 1 |
| 6  | 0.130321 | C | 1 |
| 16 | 0.409554 | C | 1 |
| 17 | 0.484372 | C | 1 |
| 15 | 0.630888 | C | 1 |
| 1  | 0.256616 | C | 1 |
| 17 | 0.235712 | C | 1 |
| 21 | 0.13339  | C | 1 |
| 10 | 0.596666 | C | 1 |
| 21 | 0.13339  | C | 1 |
| 15 | 0.630888 | C | 1 |
| 10 | 0.596666 | C | 1 |
| 17 | 0.235712 | C | 1 |
| 17 | 0.235712 | C | 1 |
| 13 | 0.578831 | D | 1 |
| 13 | 0.575749 | C | 1 |

|    |          |   |   |
|----|----------|---|---|
| 2  | 0.132322 | C | 1 |
| 16 | 0.409554 | C | 1 |
| 1  | 0.256616 | C | 1 |
| 15 | 0.630888 | C | 1 |
| 1  | 0.256616 | C | 1 |
| 16 | 0.409554 | C | 1 |
| 10 | 0.596666 | C | 1 |
| 16 | 0.409554 | C | 1 |
| 21 | 0.13339  | C | 1 |
| 21 | 0.13339  | C | 1 |
| 17 | 0.529835 | G | 0 |
| 15 | 0.630888 | C | 1 |
| 16 | 0.409554 | C | 1 |
| 6  | 0.130321 | C | 1 |
| 21 | 0.166758 | C | 1 |
| 17 | 0.235712 | C | 1 |
| 16 | 0.409554 | C | 1 |
| 24 | 0.52348  | C | 1 |
| 17 | 0.529835 | G | 0 |
| 17 | 0.529835 | G | 0 |
| 16 | 0.409554 | C | 1 |
| 24 | 0.52348  | C | 1 |
| 15 | 0.630888 | C | 1 |
| 2  | 0.132322 | C | 1 |
| 21 | 0.13339  | C | 1 |
| 16 | 0.409554 | C | 1 |
| 13 | 0.578831 | D | 1 |
| 13 | 0.575749 | C | 1 |
| 13 | 0.578831 | D | 1 |
| 21 | 0.166758 | C | 1 |
| 15 | 0.337321 | C | 1 |
| 7  | 0.104481 | C | 1 |
| 15 | 0.337321 | C | 1 |
| 15 | 0.337321 | C | 1 |
| 11 | 0.517157 | C | 1 |
| 12 | 0.446862 | Q | 0 |
| 15 | 0.337321 | C | 1 |
| 21 | 0.237458 | S | 0 |
| 23 | 0.504782 | C | 1 |
| 7  | 0.266104 | C | 1 |
| 7  | 0.589594 | C | 1 |
| 6  | 0.435749 | C | 1 |
| 21 | 0.237458 | S | 0 |
| 23 | 0.504782 | C | 1 |
| 2  | 0.263681 | C | 1 |
| 15 | 0.337321 | C | 1 |
| 7  | 0.160756 | C | 1 |
| 7  | 0.183387 | C | 1 |
| 11 | 0.517157 | C | 1 |
| 7  | 0.160756 | C | 1 |
| 21 | 0.237458 | S | 0 |
| 15 | 0.337321 | C | 1 |
| 7  | 0.183387 | C | 1 |
| 6  | 0.531813 | C | 1 |

|    |          |   |   |
|----|----------|---|---|
| 7  | 0.407882 | C | 1 |
| 6  | 0.435749 | C | 1 |
| 10 | 0.484765 | C | 1 |
| 7  | 0.104481 | C | 1 |
| 6  | 0.531813 | C | 1 |
| 3  | 0.319906 | C | 1 |
| 1  | 0.191009 | C | 1 |
| 11 | 0.517157 | C | 1 |
| 6  | 0.190055 | C | 1 |
| 1  | 0.078749 | C | 1 |
| 11 | 0.517157 | C | 1 |
| 8  | 0.312857 | C | 1 |
| 15 | 0.337321 | C | 1 |
| 7  | 0.183387 | C | 1 |
| 15 | 0.337321 | C | 1 |
| 7  | 0.160756 | C | 1 |
| 6  | 0.435749 | C | 1 |
| 1  | 0.191009 | C | 1 |
| 7  | 0.160756 | C | 1 |
| 15 | 0.337321 | C | 1 |
| 10 | 0.484765 | C | 1 |
| 7  | 0.589594 | C | 1 |
| 1  | 0.174724 | C | 1 |
| 1  | 0.330847 | C | 1 |
| 10 | 0.484765 | C | 1 |
| 1  | 0.330847 | C | 1 |
| 1  | 0.330847 | C | 1 |
| 3  | 0.319906 | C | 1 |
| 1  | 0.078749 | C | 1 |
| 9  | 0.400609 | C | 1 |
| 23 | 0.504782 | C | 1 |
| 1  | 0.078749 | C | 1 |
| 9  | 0.400609 | C | 1 |
| 2  | 0.263681 | C | 1 |
| 6  | 0.435749 | C | 1 |
| 1  | 0.330847 | C | 1 |
| 7  | 0.340175 | C | 1 |
| 8  | 0.312857 | C | 1 |
| 21 | 0.237458 | S | 0 |
| 23 | 0.504782 | C | 1 |
| 23 | 0.504782 | C | 1 |
| 1  | 0.330847 | C | 1 |
| 1  | 0.330847 | C | 1 |
| 7  | 0.183387 | C | 1 |
| 6  | 0.531813 | C | 1 |
| 6  | 0.190055 | C | 1 |
| 16 | 0.469731 | C | 1 |
| 21 | 0.237458 | S | 0 |
| 7  | 0.266104 | C | 1 |
| 2  | 0.228119 | C | 1 |
| 1  | 0.078749 | C | 1 |
| 15 | 0.337321 | C | 1 |
| 11 | 0.517157 | C | 1 |
| 1  | 0.174724 | C | 1 |

|    |          |   |   |
|----|----------|---|---|
| 11 | 0.517157 | C | 1 |
| 21 | 0.237458 | S | 0 |
| 23 | 0.625057 | N | 0 |
| 21 | 0.237458 | S | 0 |
| 1  | 0.174724 | C | 1 |
| 1  | 0.174724 | C | 1 |
| 7  | 0.183387 | C | 1 |
| 8  | 0.312857 | C | 1 |
| 6  | 0.404757 | C | 1 |
| 6  | 0.435749 | C | 1 |
| 6  | 0.435749 | C | 1 |
| 23 | 0.504782 | C | 1 |
| 6  | 0.404757 | C | 1 |
| 15 | 0.337321 | C | 1 |
| 7  | 0.589594 | C | 1 |
| 7  | 0.183387 | C | 1 |
| 16 | 0.469731 | C | 1 |
| 23 | 0.504782 | C | 1 |
| 8  | 0.312857 | C | 1 |
| 1  | 0.078749 | C | 1 |
| 8  | 0.312857 | C | 1 |
| 7  | 0.104481 | C | 1 |
| 1  | 0.191009 | C | 1 |
| 23 | 0.504782 | C | 1 |
| 15 | 0.337321 | C | 1 |
| 7  | 0.407882 | C | 1 |
| 1  | 0.191009 | C | 1 |
| 7  | 0.340175 | C | 1 |
| 21 | 0.237458 | S | 0 |
| 6  | 0.531813 | C | 1 |
| 7  | 0.407882 | C | 1 |
| 7  | 0.589594 | C | 1 |
| 7  | 0.407882 | C | 1 |
| 10 | 0.484765 | C | 1 |
| 15 | 0.337321 | C | 1 |
| 8  | 0.312857 | C | 1 |
| 11 | 0.517157 | C | 1 |
| 7  | 0.183387 | C | 1 |
| 7  | 0.589594 | C | 1 |
| 23 | 0.625057 | N | 0 |
| 11 | 0.517157 | C | 1 |
| 2  | 0.263681 | C | 1 |
| 7  | 0.160756 | C | 1 |
| 6  | 0.435749 | C | 1 |
| 1  | 0.191009 | C | 1 |
| 1  | 0.330847 | C | 1 |
| 7  | 0.160756 | C | 1 |
| 6  | 0.531813 | C | 1 |
| 10 | 0.678898 | C | 1 |
| 10 | 0.484765 | C | 1 |
| 6  | 0.190055 | C | 1 |
| 21 | 0.237458 | S | 0 |
| 9  | 0.400609 | C | 1 |
| 15 | 0.337321 | C | 1 |



|    |          |   |   |
|----|----------|---|---|
| 8  | 0.312857 | C | 1 |
| 23 | 0.504782 | C | 1 |
| 6  | 0.435749 | C | 1 |
| 7  | 0.340175 | C | 1 |
| 6  | 0.404757 | C | 1 |
| 15 | 0.337321 | C | 1 |
| 7  | 0.104481 | C | 1 |
| 16 | 0.469731 | C | 1 |
| 2  | 0.263681 | C | 1 |
| 10 | 0.484765 | C | 1 |
| 7  | 0.589594 | C | 1 |
| 7  | 0.340175 | C | 1 |
| 9  | 0.400609 | C | 1 |
| 7  | 0.160756 | C | 1 |
| 9  | 0.400609 | C | 1 |
| 8  | 0.312857 | C | 1 |
| 9  | 0.400609 | C | 1 |
| 15 | 0.337321 | C | 1 |
| 7  | 0.183387 | C | 1 |
| 7  | 0.266104 | C | 1 |
| 15 | 0.337321 | C | 1 |
| 3  | 0.319906 | C | 1 |
| 6  | 0.190055 | C | 1 |
| 7  | 0.104481 | C | 1 |
| 6  | 0.190055 | C | 1 |
| 7  | 0.266104 | C | 1 |
| 6  | 0.190055 | C | 1 |
| 3  | 0.319906 | C | 1 |
| 6  | 0.435749 | C | 1 |
| 6  | 0.531813 | C | 1 |
| 6  | 0.190055 | C | 1 |
| 9  | 0.400609 | C | 1 |
| 6  | 0.404757 | C | 1 |
| 23 | 0.504782 | C | 1 |
| 10 | 0.678898 | C | 1 |
| 15 | 0.337321 | C | 1 |
| 7  | 0.266104 | C | 1 |
| 11 | 0.517157 | C | 1 |
| 6  | 0.435749 | C | 1 |
| 6  | 0.435749 | C | 1 |
| 11 | 0.517157 | C | 1 |
| 16 | 0.469731 | C | 1 |
| 1  | 0.174724 | C | 1 |
| 7  | 0.183387 | C | 1 |
| 6  | 0.190055 | C | 1 |
| 1  | 0.330847 | C | 1 |
| 10 | 0.678898 | C | 1 |
| 10 | 0.678898 | C | 1 |
| 7  | 0.589594 | C | 1 |
| 7  | 0.266104 | C | 1 |
| 6  | 0.531813 | C | 1 |
| 16 | 0.469731 | C | 1 |
| 7  | 0.407882 | C | 1 |
| 11 | 0.517157 | C | 1 |

|    |          |   |   |
|----|----------|---|---|
| 15 | 0.337321 | C | 1 |
| 23 | 0.625057 | N | 0 |
| 3  | 0.319906 | C | 1 |
| 2  | 0.228119 | C | 1 |
| 7  | 0.589594 | C | 1 |
| 9  | 0.400609 | C | 1 |
| 7  | 0.160756 | C | 1 |
| 10 | 0.484765 | C | 1 |
| 7  | 0.183387 | C | 1 |
| 11 | 0.517157 | C | 1 |
| 23 | 0.625057 | N | 0 |
| 9  | 0.400609 | C | 1 |
| 11 | 0.517157 | C | 1 |
| 7  | 0.183387 | C | 1 |
| 15 | 0.337321 | C | 1 |
| 15 | 0.337321 | C | 1 |
| 3  | 0.319906 | C | 1 |
| 6  | 0.404757 | C | 1 |
| 6  | 0.190055 | C | 1 |
| 8  | 0.312857 | C | 1 |
| 7  | 0.589594 | C | 1 |
| 7  | 0.266104 | C | 1 |
| 11 | 0.517157 | C | 1 |
| 3  | 0.319906 | C | 1 |
| 16 | 0.469731 | C | 1 |
| 1  | 0.078749 | C | 1 |
| 15 | 0.337321 | C | 1 |
| 16 | 0.469731 | C | 1 |
| 7  | 0.160756 | C | 1 |
| 2  | 0.263681 | C | 1 |
| 7  | 0.340175 | C | 1 |
| 7  | 0.589594 | C | 1 |
| 7  | 0.340175 | C | 1 |
| 7  | 0.340175 | C | 1 |
| 7  | 0.340175 | C | 1 |
| 11 | 0.517157 | C | 1 |
| 7  | 0.266104 | C | 1 |
| 7  | 0.160756 | C | 1 |
| 7  | 0.160756 | C | 1 |
| 6  | 0.435749 | C | 1 |
| 2  | 0.263681 | C | 1 |
| 9  | 0.400609 | C | 1 |
| 6  | 0.404757 | C | 1 |
| 9  | 0.400609 | C | 1 |
| 23 | 0.625057 | N | 0 |
| 6  | 0.435749 | C | 1 |
| 3  | 0.319906 | C | 1 |
| 7  | 0.340175 | C | 1 |
| 7  | 0.340175 | C | 1 |
| 7  | 0.340175 | C | 1 |
| 23 | 0.625057 | N | 0 |
| 9  | 0.400609 | C | 1 |
| 1  | 0.174724 | C | 1 |
| 10 | 0.484765 | C | 1 |

|    |          |   |   |
|----|----------|---|---|
| 3  | 0.319906 | C | 1 |
| 12 | 0.446862 | Q | 0 |
| 6  | 0.531813 | C | 1 |
| 15 | 0.337321 | C | 1 |
| 16 | 0.469731 | C | 1 |
| 21 | 0.237458 | S | 0 |
| 6  | 0.531813 | C | 1 |
| 3  | 0.319906 | C | 1 |
| 3  | 0.319906 | C | 1 |
| 10 | 0.484765 | C | 1 |
| 6  | 0.190055 | C | 1 |
| 10 | 0.678898 | C | 1 |
| 2  | 0.228119 | C | 1 |
| 6  | 0.531813 | C | 1 |
| 7  | 0.407882 | C | 1 |
| 1  | 0.174724 | C | 1 |
| 7  | 0.340175 | C | 1 |
| 6  | 0.531813 | C | 1 |
| 6  | 0.435749 | C | 1 |
| 12 | 0.446862 | Q | 0 |
| 9  | 0.400609 | C | 1 |
| 7  | 0.407882 | C | 1 |
| 10 | 0.484765 | C | 1 |
| 11 | 0.517157 | C | 1 |
| 6  | 0.435749 | C | 1 |
| 7  | 0.183387 | C | 1 |
| 11 | 0.517157 | C | 1 |
| 6  | 0.351052 | C | 1 |
| 3  | 0.470293 | A | 0 |
| 11 | 0.640856 | C | 1 |
| 3  | 0.470293 | A | 0 |
| 6  | 0.351052 | C | 1 |
| 11 | 0.640856 | C | 1 |
| 6  | 0.351052 | C | 1 |
| 6  | 0.351052 | C | 1 |
| 11 | 0.640856 | C | 1 |
| 6  | 0.351052 | C | 1 |
| 3  | 0.470293 | A | 0 |
| 6  | 0.351052 | C | 1 |
| 10 | 0.33751  | C | 1 |
| 10 | 0.33751  | C | 1 |
| 10 | 0.33751  | C | 1 |
| 10 | 0.33751  | C | 1 |
| 6  | 0.351052 | C | 1 |
| 6  | 0.351052 | C | 1 |
| 6  | 0.351052 | C | 1 |
| 10 | 0.33751  | C | 1 |
| 2  | 0.36725  | C | 1 |
| 15 | 0.535944 | C | 1 |
| 15 | 0.535944 | C | 1 |
| 20 | 0.647848 | L | 0 |
| 2  | 0.36725  | C | 1 |
| 6  | 0.395796 | C | 1 |
| 7  | 0.408321 | C | 1 |

|    |          |   |   |
|----|----------|---|---|
| 7  | 0.408321 | C | 1 |
| 3  | 0.10984  | C | 1 |
| 23 | 0.888768 | C | 1 |
| 20 | 0.646789 | F | 0 |
| 24 | 0.788877 | C | 1 |
| 7  | 0.260838 | M | 0 |
| 9  | 0.57134  | C | 1 |
| 6  | 0.244715 | I | 0 |
| 7  | 0.260838 | M | 0 |
| 20 | 0.647848 | L | 0 |
| 7  | 0.260838 | M | 0 |
| 7  | 0.408321 | C | 1 |
| 24 | 0.788877 | C | 1 |
| 6  | 0.511173 | C | 1 |
| 7  | 0.597947 | I | 0 |
| 6  | 0.244715 | I | 0 |
| 6  | 0.511173 | C | 1 |
| 1  | 0.694811 | F | 0 |
| 15 | 0.535944 | C | 1 |
| 23 | 0.888768 | C | 1 |
| 6  | 0.244715 | I | 0 |
| 6  | 0.511173 | C | 1 |
| 6  | 0.250737 | C | 1 |
| 6  | 0.395796 | C | 1 |
| 23 | 0.888768 | C | 1 |
| 3  | 0.10984  | C | 1 |
| 15 | 0.535944 | C | 1 |
| 1  | 0.138128 | M | 0 |
| 6  | 0.511173 | C | 1 |
| 6  | 0.244715 | I | 0 |
| 6  | 0.244715 | I | 0 |
| 20 | 0.646789 | F | 0 |
| 7  | 0.260838 | M | 0 |
| 9  | 0.57134  | C | 1 |
| 20 | 0.647848 | L | 0 |
| 6  | 0.250737 | C | 1 |
| 7  | 0.483364 | C | 1 |
| 1  | 0.098197 | C | 1 |
| 7  | 0.260838 | M | 0 |
| 6  | 0.395796 | C | 1 |
| 7  | 0.483364 | C | 1 |
| 6  | 0.395796 | C | 1 |
| 5  | 0.14175  | C | 1 |
| 3  | 0.075642 | C | 1 |
| 15 | 0.129001 | C | 1 |
| 6  | 0.244715 | I | 0 |
| 23 | 0.888768 | C | 1 |
| 7  | 0.260838 | M | 0 |
| 7  | 0.260838 | M | 0 |
| 2  | 0.36725  | C | 1 |
| 6  | 0.395796 | C | 1 |
| 15 | 0.535944 | C | 1 |
| 7  | 0.597947 | I | 0 |
| 20 | 0.646789 | F | 0 |

|    |          |   |   |
|----|----------|---|---|
| 7  | 0.487162 | C | 1 |
| 24 | 0.788877 | C | 1 |
| 7  | 0.260838 | M | 0 |
| 7  | 0.260838 | M | 0 |
| 5  | 0.14175  | C | 1 |
| 5  | 0.14175  | C | 1 |
| 7  | 0.408321 | C | 1 |
| 20 | 0.646789 | F | 0 |
| 20 | 0.647848 | L | 0 |
| 23 | 0.888768 | C | 1 |
| 9  | 0.57134  | C | 1 |
| 15 | 0.129001 | C | 1 |
| 6  | 0.244715 | I | 0 |
| 23 | 0.888768 | C | 1 |
| 7  | 0.483364 | C | 1 |
| 3  | 0.075642 | C | 1 |
| 15 | 0.535944 | C | 1 |
| 6  | 0.395796 | C | 1 |
| 5  | 0.14175  | C | 1 |
| 6  | 0.250737 | C | 1 |
| 7  | 0.260838 | M | 0 |
| 15 | 0.535944 | C | 1 |
| 7  | 0.483364 | C | 1 |
| 7  | 0.483364 | C | 1 |
| 6  | 0.244715 | I | 0 |
| 6  | 0.511173 | C | 1 |
| 1  | 0.138128 | M | 0 |
| 6  | 0.395796 | C | 1 |
| 7  | 0.408321 | C | 1 |
| 9  | 0.57134  | C | 1 |
| 7  | 0.408321 | C | 1 |
| 20 | 0.647848 | L | 0 |
| 7  | 0.487162 | C | 1 |
| 7  | 0.487162 | C | 1 |
| 2  | 0.36725  | C | 1 |
| 24 | 0.788877 | C | 1 |
| 9  | 0.57134  | C | 1 |
| 6  | 0.511173 | C | 1 |
| 6  | 0.244715 | I | 0 |
| 15 | 0.535944 | C | 1 |
| 6  | 0.511173 | C | 1 |
| 23 | 0.888768 | C | 1 |
| 15 | 0.535944 | C | 1 |
| 7  | 0.260838 | M | 0 |
| 7  | 0.408321 | C | 1 |
| 5  | 0.14175  | C | 1 |
| 7  | 0.597947 | I | 0 |
| 6  | 0.395796 | C | 1 |
| 20 | 0.646789 | F | 0 |
| 1  | 0.138128 | M | 0 |
| 7  | 0.260838 | M | 0 |
| 23 | 0.888768 | C | 1 |
| 15 | 0.535944 | C | 1 |
| 2  | 0.36725  | C | 1 |

|    |          |   |   |
|----|----------|---|---|
| 20 | 0.647848 | L | 0 |
| 6  | 0.244715 | I | 0 |
| 15 | 0.535944 | C | 1 |
| 15 | 0.535944 | C | 1 |
| 20 | 0.646789 | F | 0 |
| 7  | 0.260838 | M | 0 |
| 5  | 0.14175  | C | 1 |
| 1  | 0.098197 | C | 1 |
| 7  | 0.597947 | I | 0 |
| 7  | 0.260838 | M | 0 |
| 7  | 0.483364 | C | 1 |
| 7  | 0.597947 | I | 0 |
| 7  | 0.408321 | C | 1 |
| 7  | 0.260838 | M | 0 |
| 5  | 0.14175  | C | 1 |
| 24 | 0.788877 | C | 1 |
| 7  | 0.483364 | C | 1 |
| 6  | 0.244715 | I | 0 |
| 6  | 0.250737 | C | 1 |
| 6  | 0.395796 | C | 1 |
| 7  | 0.260838 | M | 0 |
| 9  | 0.57134  | C | 1 |
| 15 | 0.129001 | C | 1 |
| 1  | 0.098197 | C | 1 |
| 15 | 0.535944 | C | 1 |
| 6  | 0.395796 | C | 1 |
| 6  | 0.244715 | I | 0 |
| 3  | 0.075642 | C | 1 |
| 15 | 0.535944 | C | 1 |
| 15 | 0.535944 | C | 1 |
| 15 | 0.535944 | C | 1 |
| 15 | 0.535944 | C | 1 |
| 2  | 0.36725  | C | 1 |
| 24 | 0.788877 | C | 1 |
| 23 | 0.888768 | C | 1 |
| 7  | 0.408321 | C | 1 |
| 24 | 0.788877 | C | 1 |
| 1  | 0.138128 | M | 0 |
| 6  | 0.244715 | I | 0 |
| 20 | 0.646789 | F | 0 |
| 23 | 0.888768 | C | 1 |
| 15 | 0.129001 | C | 1 |
| 15 | 0.129001 | C | 1 |
| 6  | 0.395796 | C | 1 |
| 15 | 0.535944 | C | 1 |
| 6  | 0.395796 | C | 1 |
| 7  | 0.487162 | C | 1 |
| 20 | 0.647848 | L | 0 |
| 6  | 0.511173 | C | 1 |
| 20 | 0.646789 | F | 0 |
| 20 | 0.646789 | F | 0 |
| 24 | 0.788877 | C | 1 |
| 15 | 0.535944 | C | 1 |
| 7  | 0.483364 | C | 1 |

|    |          |   |   |
|----|----------|---|---|
| 7  | 0.408321 | C | 1 |
| 24 | 0.788877 | C | 1 |
| 6  | 0.250737 | C | 1 |
| 7  | 0.408321 | C | 1 |
| 7  | 0.408321 | C | 1 |
| 7  | 0.597947 | I | 0 |
| 24 | 0.788877 | C | 1 |
| 24 | 0.788877 | C | 1 |
| 7  | 0.487162 | C | 1 |
| 6  | 0.250737 | C | 1 |
| 6  | 0.250737 | C | 1 |
| 7  | 0.408321 | C | 1 |
| 24 | 0.788877 | C | 1 |
| 15 | 0.535944 | C | 1 |
| 9  | 0.57134  | C | 1 |
| 7  | 0.260838 | M | 0 |
| 24 | 0.788877 | C | 1 |
| 6  | 0.244715 | I | 0 |
| 9  | 0.57134  | C | 1 |
| 3  | 0.10984  | C | 1 |
| 1  | 0.694811 | F | 0 |
| 2  | 0.36725  | C | 1 |
| 1  | 0.138128 | M | 0 |
| 7  | 0.597947 | I | 0 |
| 1  | 0.138128 | M | 0 |
| 15 | 0.535944 | C | 1 |
| 7  | 0.487162 | C | 1 |
| 7  | 0.487162 | C | 1 |
| 20 | 0.647848 | L | 0 |
| 7  | 0.260838 | M | 0 |
| 20 | 0.647848 | L | 0 |
| 6  | 0.395796 | C | 1 |
| 7  | 0.408321 | C | 1 |
| 6  | 0.511173 | C | 1 |
| 5  | 0.14175  | C | 1 |
| 7  | 0.487162 | C | 1 |
| 6  | 0.395796 | C | 1 |
| 3  | 0.075642 | C | 1 |
| 1  | 0.138128 | M | 0 |
| 20 | 0.646789 | F | 0 |
| 9  | 0.57134  | C | 1 |
| 1  | 0.138128 | M | 0 |
| 7  | 0.487162 | C | 1 |
| 6  | 0.511173 | C | 1 |
| 15 | 0.535944 | C | 1 |
| 9  | 0.57134  | C | 1 |
| 20 | 0.646789 | F | 0 |
| 9  | 0.57134  | C | 1 |
| 6  | 0.511173 | C | 1 |
| 3  | 0.075642 | C | 1 |
| 1  | 0.694811 | F | 0 |
| 9  | 0.57134  | C | 1 |
| 15 | 0.535944 | C | 1 |
| 20 | 0.646789 | F | 0 |

|    |          |   |   |
|----|----------|---|---|
| 6  | 0.395796 | C | 1 |
| 6  | 0.395796 | C | 1 |
| 6  | 0.250737 | C | 1 |
| 7  | 0.597947 | I | 0 |
| 9  | 0.57134  | C | 1 |
| 7  | 0.597947 | I | 0 |
| 7  | 0.483364 | C | 1 |
| 10 | 0.425832 | I | 0 |
| 6  | 0.419266 | C | 1 |
| 10 | 0.447673 | C | 1 |
| 10 | 0.447673 | C | 1 |
| 10 | 0.447673 | C | 1 |
| 17 | 0.636017 | C | 1 |
| 7  | 0.235213 | C | 1 |
| 5  | 0.138212 | C | 1 |
| 10 | 0.447673 | C | 1 |
| 1  | 0.189347 | C | 1 |
| 10 | 0.447673 | C | 1 |
| 11 | 0.311362 | C | 1 |
| 10 | 0.447673 | C | 1 |
| 9  | 0.348399 | C | 1 |
| 3  | 0.146943 | C | 1 |
| 13 | 0.433202 | C | 1 |
| 7  | 0.48297  | C | 1 |
| 9  | 0.348399 | C | 1 |
| 13 | 0.178572 | C | 1 |
| 13 | 0.178572 | C | 1 |
| 5  | 0.138212 | C | 1 |
| 14 | 0.388553 | C | 1 |
| 8  | 0.523884 | C | 1 |
| 5  | 0.413087 | C | 1 |
| 3  | 0.146943 | C | 1 |
| 3  | 0.146943 | C | 1 |
| 5  | 0.349275 | C | 1 |
| 7  | 0.186967 | C | 1 |
| 10 | 0.425832 | I | 0 |
| 15 | 0.546566 | E | 1 |
| 1  | 0.174923 | C | 1 |
| 7  | 0.48297  | C | 1 |
| 5  | 0.138212 | C | 1 |
| 5  | 0.413087 | C | 1 |
| 9  | 0.311571 | C | 1 |
| 7  | 0.48297  | C | 1 |
| 1  | 0.174923 | C | 1 |
| 3  | 0.391944 | C | 1 |
| 6  | 0.419266 | C | 1 |
| 3  | 0.391944 | C | 1 |
| 7  | 0.186967 | C | 1 |
| 10 | 0.425832 | I | 0 |
| 10 | 0.447673 | C | 1 |
| 5  | 0.349275 | C | 1 |
| 9  | 0.311571 | C | 1 |
| 5  | 0.349275 | C | 1 |
| 1  | 0.169044 | C | 1 |



|    |          |   |   |
|----|----------|---|---|
| 9  | 0.311571 | C | 1 |
| 8  | 0.523884 | C | 1 |
| 7  | 0.605005 | C | 1 |
| 7  | 0.186967 | C | 1 |
| 5  | 0.413087 | C | 1 |
| 7  | 0.544335 | C | 1 |
| 6  | 0.419266 | C | 1 |
| 13 | 0.178572 | C | 1 |
| 13 | 0.433202 | C | 1 |
| 7  | 0.535317 | C | 1 |
| 10 | 0.425832 | I | 0 |
| 13 | 0.433202 | C | 1 |
| 1  | 0.169044 | C | 1 |
| 18 | 0.355843 | C | 1 |
| 11 | 0.311362 | C | 1 |
| 9  | 0.311571 | C | 1 |
| 2  | 0.677122 | C | 1 |
| 3  | 0.187302 | C | 1 |
| 14 | 0.388553 | C | 1 |
| 3  | 0.146943 | C | 1 |
| 7  | 0.535317 | C | 1 |
| 9  | 0.348399 | C | 1 |
| 6  | 0.616837 | C | 1 |
| 5  | 0.413087 | C | 1 |
| 6  | 0.616837 | C | 1 |
| 6  | 0.616837 | C | 1 |
| 5  | 0.413087 | C | 1 |
| 7  | 0.544335 | C | 1 |
| 5  | 0.349275 | C | 1 |
| 14 | 0.388553 | C | 1 |
| 3  | 0.187302 | C | 1 |
| 9  | 0.311571 | C | 1 |
| 1  | 0.566677 | C | 1 |
| 13 | 0.178572 | C | 1 |
| 9  | 0.311571 | C | 1 |
| 18 | 0.355843 | C | 1 |
| 6  | 0.419266 | C | 1 |
| 18 | 0.355843 | C | 1 |
| 3  | 0.146943 | C | 1 |
| 14 | 0.388553 | C | 1 |
| 7  | 0.48297  | C | 1 |
| 3  | 0.146943 | C | 1 |
| 10 | 0.676349 | C | 1 |
| 3  | 0.391944 | C | 1 |
| 13 | 0.433202 | C | 1 |
| 11 | 0.311362 | C | 1 |
| 7  | 0.544335 | C | 1 |
| 1  | 0.169044 | C | 1 |
| 5  | 0.138212 | C | 1 |
| 7  | 0.266842 | C | 1 |
| 5  | 0.138212 | C | 1 |
| 5  | 0.138212 | C | 1 |
| 5  | 0.138212 | C | 1 |
| 5  | 0.138212 | C | 1 |

|    |          |   |   |
|----|----------|---|---|
| 1  | 0.161016 | C | 1 |
| 7  | 0.48297  | C | 1 |
| 17 | 0.636017 | C | 1 |
| 9  | 0.348399 | C | 1 |
| 14 | 0.388553 | C | 1 |
| 5  | 0.138212 | C | 1 |
| 13 | 0.4623   | C | 1 |
| 7  | 0.186967 | C | 1 |
| 17 | 0.636017 | C | 1 |
| 7  | 0.544335 | C | 1 |
| 7  | 0.535317 | C | 1 |
| 6  | 0.616837 | C | 1 |
| 1  | 0.174923 | C | 1 |
| 10 | 0.425832 | I | 0 |
| 5  | 0.413087 | C | 1 |
| 2  | 0.41058  | C | 1 |
| 2  | 0.677122 | C | 1 |
| 11 | 0.311362 | C | 1 |
| 7  | 0.605005 | C | 1 |
| 7  | 0.48297  | C | 1 |
| 14 | 0.388553 | C | 1 |
| 7  | 0.535317 | C | 1 |
| 7  | 0.535317 | C | 1 |
| 10 | 0.425832 | I | 0 |
| 2  | 0.35676  | C | 1 |
| 6  | 0.616837 | C | 1 |
| 7  | 0.266842 | C | 1 |
| 5  | 0.349275 | C | 1 |
| 2  | 0.677122 | C | 1 |
| 7  | 0.186967 | C | 1 |
| 10 | 0.447673 | C | 1 |
| 14 | 0.388553 | C | 1 |
| 5  | 0.138212 | C | 1 |
| 3  | 0.391944 | C | 1 |
| 13 | 0.433202 | C | 1 |
| 17 | 0.636017 | C | 1 |
| 18 | 0.355843 | C | 1 |
| 7  | 0.535317 | C | 1 |
| 8  | 0.523884 | C | 1 |
| 7  | 0.605005 | C | 1 |
| 1  | 0.161016 | C | 1 |
| 6  | 0.616837 | C | 1 |
| 13 | 0.178572 | C | 1 |
| 7  | 0.544335 | C | 1 |
| 6  | 0.419266 | C | 1 |
| 6  | 0.616837 | C | 1 |
| 3  | 0.146943 | C | 1 |
| 6  | 0.616837 | C | 1 |
| 13 | 0.433202 | C | 1 |
| 9  | 0.311571 | C | 1 |
| 7  | 0.605005 | C | 1 |
| 2  | 0.41058  | C | 1 |
| 11 | 0.311362 | C | 1 |
| 1  | 0.566677 | C | 1 |

|    |          |   |   |
|----|----------|---|---|
| 13 | 0.433202 | C | 1 |
| 3  | 0.391944 | C | 1 |
| 7  | 0.266842 | C | 1 |
| 9  | 0.348399 | C | 1 |
| 9  | 0.348399 | C | 1 |
| 17 | 0.636017 | C | 1 |
| 5  | 0.349275 | C | 1 |
| 7  | 0.235213 | C | 1 |
| 7  | 0.235213 | C | 1 |
| 6  | 0.419266 | C | 1 |
| 7  | 0.605005 | C | 1 |
| 7  | 0.535317 | C | 1 |
| 1  | 0.566677 | C | 1 |
| 14 | 0.388553 | C | 1 |
| 6  | 0.419266 | C | 1 |
| 10 | 0.447673 | C | 1 |
| 9  | 0.348399 | C | 1 |
| 11 | 0.311362 | C | 1 |
| 14 | 0.388553 | C | 1 |
| 7  | 0.266842 | C | 1 |
| 5  | 0.349275 | C | 1 |
| 2  | 0.41058  | C | 1 |
| 7  | 0.186967 | C | 1 |
| 5  | 0.349275 | C | 1 |
| 6  | 0.419266 | C | 1 |
| 10 | 0.447673 | C | 1 |
| 5  | 0.138212 | C | 1 |
| 7  | 0.266842 | C | 1 |
| 2  | 0.35676  | C | 1 |
| 5  | 0.349275 | C | 1 |
| 3  | 0.146943 | C | 1 |
| 8  | 0.523884 | C | 1 |
| 10 | 0.425832 | I | 0 |
| 18 | 0.355843 | C | 1 |
| 7  | 0.266842 | C | 1 |
| 8  | 0.523884 | C | 1 |
| 10 | 0.425832 | I | 0 |
| 11 | 0.311362 | C | 1 |
| 13 | 0.4623   | C | 1 |
| 9  | 0.311571 | C | 1 |
| 7  | 0.544335 | C | 1 |
| 7  | 0.535317 | C | 1 |
| 7  | 0.48297  | C | 1 |
| 14 | 0.388553 | C | 1 |
| 14 | 0.388553 | C | 1 |
| 14 | 0.388553 | C | 1 |
| 17 | 0.636017 | C | 1 |
| 17 | 0.636017 | C | 1 |
| 10 | 0.425832 | I | 0 |
| 10 | 0.425832 | I | 0 |
| 9  | 0.311571 | C | 1 |
| 10 | 0.425832 | I | 0 |
| 10 | 0.425832 | I | 0 |
| 10 | 0.447673 | C | 1 |

|    |          |   |   |
|----|----------|---|---|
| 7  | 0.48297  | C | 1 |
| 10 | 0.447673 | C | 1 |
| 10 | 0.447673 | C | 1 |
| 10 | 0.447673 | C | 1 |
| 10 | 0.447673 | C | 1 |
| 7  | 0.48297  | C | 1 |
| 7  | 0.605005 | C | 1 |
| 13 | 0.433202 | C | 1 |
| 17 | 0.636017 | C | 1 |
| 18 | 0.355843 | C | 1 |
| 13 | 0.4623   | C | 1 |
| 2  | 0.41058  | C | 1 |
| 13 | 0.178572 | C | 1 |
| 10 | 0.676349 | C | 1 |
| 11 | 0.311362 | C | 1 |
| 11 | 0.311362 | C | 1 |
| 5  | 0.413087 | C | 1 |
| 1  | 0.189347 | C | 1 |
| 5  | 0.413087 | C | 1 |
| 7  | 0.235213 | C | 1 |
| 7  | 0.186967 | C | 1 |
| 5  | 0.138212 | C | 1 |
| 5  | 0.138212 | C | 1 |
| 10 | 0.676349 | C | 1 |
| 13 | 0.4623   | C | 1 |
| 13 | 0.4623   | C | 1 |
| 13 | 0.4623   | C | 1 |
| 5  | 0.138212 | C | 1 |
| 17 | 0.636017 | C | 1 |
| 7  | 0.266842 | C | 1 |
| 9  | 0.348399 | C | 1 |
| 7  | 0.235213 | C | 1 |
| 3  | 0.146943 | C | 1 |
| 7  | 0.186967 | C | 1 |
| 15 | 0.546566 | E | 1 |
| 13 | 0.433202 | C | 1 |
| 18 | 0.355843 | C | 1 |
| 7  | 0.186967 | C | 1 |
| 13 | 0.433202 | C | 1 |
| 11 | 0.311362 | C | 1 |
| 14 | 0.388553 | C | 1 |
| 2  | 0.677122 | C | 1 |
| 13 | 0.433202 | C | 1 |
| 13 | 0.178572 | C | 1 |
| 7  | 0.605005 | C | 1 |
| 7  | 0.235213 | C | 1 |
| 9  | 0.348399 | C | 1 |
| 7  | 0.544335 | C | 1 |
| 5  | 0.349275 | C | 1 |
| 1  | 0.189347 | C | 1 |
| 7  | 0.544335 | C | 1 |
| 2  | 0.35676  | C | 1 |
| 8  | 0.523884 | C | 1 |
| 7  | 0.266842 | C | 1 |

|    |          |   |   |
|----|----------|---|---|
| 7  | 0.266842 | C | 1 |
| 9  | 0.311571 | C | 1 |
| 9  | 0.348399 | C | 1 |
| 6  | 0.419266 | C | 1 |
| 7  | 0.535317 | C | 1 |
| 13 | 0.433202 | C | 1 |
| 18 | 0.355843 | C | 1 |
| 7  | 0.266842 | C | 1 |
| 8  | 0.523884 | C | 1 |
| 2  | 0.677122 | C | 1 |
| 13 | 0.4623   | C | 1 |
| 2  | 0.41058  | C | 1 |
| 13 | 0.178572 | C | 1 |
| 9  | 0.348399 | C | 1 |
| 1  | 0.161016 | C | 1 |
| 11 | 0.311362 | C | 1 |
| 6  | 0.419266 | C | 1 |
| 7  | 0.235213 | C | 1 |
| 13 | 0.178572 | C | 1 |
| 6  | 0.419266 | C | 1 |
| 11 | 0.311362 | C | 1 |
| 5  | 0.349275 | C | 1 |
| 1  | 0.189347 | C | 1 |
| 8  | 0.523884 | C | 1 |
| 10 | 0.447673 | C | 1 |
| 13 | 0.4623   | C | 1 |
| 9  | 0.348399 | C | 1 |
| 15 | 0.546566 | E | 1 |
| 3  | 0.146943 | C | 1 |
| 1  | 0.566677 | C | 1 |
| 6  | 0.419266 | C | 1 |
| 13 | 0.178572 | C | 1 |
| 7  | 0.535317 | C | 1 |
| 7  | 0.535317 | C | 1 |
| 1  | 0.566677 | C | 1 |
| 1  | 0.189347 | C | 1 |
| 3  | 0.187302 | C | 1 |
| 7  | 0.48297  | C | 1 |
| 7  | 0.48297  | C | 1 |
| 8  | 0.523884 | C | 1 |
| 6  | 0.419266 | C | 1 |
| 8  | 0.523884 | C | 1 |
| 18 | 0.355843 | C | 1 |
| 16 | 0.657399 | C | 1 |
| 21 | 0.324039 | C | 1 |
| 6  | 0.567755 | C | 1 |
| 16 | 0.657399 | C | 1 |
| 6  | 0.681079 | F | 0 |
| 16 | 0.657399 | C | 1 |
| 3  | 0.573741 | C | 1 |
| 16 | 0.657399 | C | 1 |
| 20 | 0.857071 | C | 1 |
| 2  | 0.662143 | C | 1 |
| 6  | 0.46527  | C | 1 |

|    |          |   |   |
|----|----------|---|---|
| 16 | 0.657399 | C | 1 |
| 3  | 0.228423 | C | 1 |
| 10 | 0.678613 | E | 1 |
| 20 | 0.371378 | A | 0 |
| 24 | 0.676899 | C | 1 |
| 9  | 0.403875 | I | 0 |
| 16 | 0.657399 | C | 1 |
| 6  | 0.567755 | C | 1 |
| 6  | 0.567755 | C | 1 |
| 3  | 0.573741 | C | 1 |
| 15 | 0.282717 | R | 0 |
| 24 | 0.676899 | C | 1 |
| 9  | 0.403875 | I | 0 |
| 15 | 0.282717 | R | 0 |
| 3  | 0.228423 | C | 1 |
| 8  | 0.219034 | C | 1 |
| 8  | 0.219034 | C | 1 |
| 15 | 0.282717 | R | 0 |
| 3  | 0.726086 | N | 0 |
| 8  | 0.219034 | C | 1 |
| 6  | 0.32996  | C | 1 |
| 16 | 0.657399 | C | 1 |
| 20 | 0.455623 | C | 1 |
| 1  | 0.551514 | I | 0 |
| 6  | 0.46527  | C | 1 |
| 9  | 0.403875 | I | 0 |
| 19 | 0.2971   | C | 1 |
| 7  | 0.294111 | I | 0 |
| 3  | 0.726086 | N | 0 |
| 16 | 0.657399 | C | 1 |
| 9  | 0.403875 | I | 0 |
| 13 | 0.540884 | C | 1 |
| 8  | 0.219034 | C | 1 |
| 8  | 0.219034 | C | 1 |
| 20 | 0.857071 | C | 1 |
| 8  | 0.219034 | C | 1 |
| 8  | 0.219034 | C | 1 |
| 8  | 0.219034 | C | 1 |
| 20 | 0.455623 | C | 1 |
| 5  | 0.199147 | C | 1 |
| 9  | 0.403875 | I | 0 |
| 19 | 0.2971   | C | 1 |
| 3  | 0.726086 | N | 0 |
| 6  | 0.681079 | F | 0 |
| 9  | 0.403875 | I | 0 |
| 6  | 0.681079 | F | 0 |
| 16 | 0.657399 | C | 1 |
| 13 | 0.383706 | C | 1 |
| 3  | 0.726086 | N | 0 |
| 16 | 0.657399 | C | 1 |
| 5  | 0.199147 | C | 1 |
| 7  | 0.3873   | A | 0 |
| 6  | 0.205747 | C | 1 |
| 6  | 0.205747 | C | 1 |

|    |          |   |   |
|----|----------|---|---|
| 6  | 0.205747 | C | 1 |
| 9  | 0.403875 | I | 0 |
| 13 | 0.383706 | C | 1 |
| 6  | 0.205747 | C | 1 |
| 16 | 0.657399 | C | 1 |
| 13 | 0.66352  | C | 1 |
| 10 | 0.678613 | E | 1 |
| 6  | 0.681079 | F | 0 |
| 13 | 0.383706 | C | 1 |
| 24 | 0.676899 | C | 1 |
| 8  | 0.219034 | C | 1 |
| 5  | 0.199147 | C | 1 |
| 3  | 0.573741 | C | 1 |
| 15 | 0.282717 | R | 0 |
| 6  | 0.32996  | C | 1 |
| 16 | 0.657399 | C | 1 |
| 1  | 0.551514 | I | 0 |
| 16 | 0.657399 | C | 1 |
| 16 | 0.657399 | C | 1 |
| 9  | 0.403875 | I | 0 |
| 6  | 0.46527  | C | 1 |
| 20 | 0.371378 | A | 0 |
| 20 | 0.455623 | C | 1 |
| 6  | 0.205747 | C | 1 |
| 6  | 0.32996  | C | 1 |
| 20 | 0.857071 | C | 1 |
| 6  | 0.527367 | C | 1 |
| 15 | 0.282717 | R | 0 |
| 6  | 0.205747 | C | 1 |
| 13 | 0.540884 | C | 1 |
| 6  | 0.527367 | C | 1 |
| 19 | 0.2971   | C | 1 |
| 9  | 0.403875 | I | 0 |
| 2  | 0.662143 | C | 1 |
| 20 | 0.455623 | C | 1 |
| 7  | 0.3873   | A | 0 |
| 6  | 0.567755 | C | 1 |
| 16 | 0.657399 | C | 1 |
| 16 | 0.657399 | C | 1 |
| 3  | 0.726086 | N | 0 |
| 2  | 0.662143 | C | 1 |
| 9  | 0.403875 | I | 0 |
| 16 | 0.657399 | C | 1 |
| 10 | 0.678613 | E | 1 |
| 9  | 0.403875 | I | 0 |
| 9  | 0.403875 | I | 0 |
| 20 | 0.455623 | C | 1 |
| 16 | 0.657399 | C | 1 |
| 13 | 0.66352  | C | 1 |
| 8  | 0.219034 | C | 1 |
| 13 | 0.66352  | C | 1 |
| 6  | 0.205747 | C | 1 |
| 3  | 0.726086 | N | 0 |
| 8  | 0.219034 | C | 1 |

|    |          |   |   |
|----|----------|---|---|
| 8  | 0.219034 | C | 1 |
| 7  | 0.3873   | A | 0 |
| 7  | 0.294111 | I | 0 |
| 21 | 0.324039 | C | 1 |
| 21 | 0.324039 | C | 1 |
| 3  | 0.228423 | C | 1 |
| 9  | 0.403875 | I | 0 |
| 15 | 0.282717 | R | 0 |
| 24 | 0.676899 | C | 1 |
| 8  | 0.219034 | C | 1 |
| 16 | 0.657399 | C | 1 |
| 7  | 0.294111 | I | 0 |
| 2  | 0.662143 | C | 1 |
| 6  | 0.205747 | C | 1 |
| 20 | 0.371378 | A | 0 |
| 9  | 0.403875 | I | 0 |
| 8  | 0.219034 | C | 1 |
| 9  | 0.403875 | I | 0 |
| 19 | 0.2971   | C | 1 |
| 20 | 0.371378 | A | 0 |
| 6  | 0.681079 | F | 0 |
| 16 | 0.657399 | C | 1 |
| 24 | 0.676899 | C | 1 |
| 6  | 0.46527  | C | 1 |
| 7  | 0.294111 | I | 0 |
| 7  | 0.3873   | A | 0 |
| 16 | 0.657399 | C | 1 |
| 20 | 0.371378 | A | 0 |
| 20 | 0.857071 | C | 1 |
| 6  | 0.46527  | C | 1 |
| 16 | 0.657399 | C | 1 |
| 16 | 0.657399 | C | 1 |
| 7  | 0.3873   | A | 0 |
| 3  | 0.573741 | C | 1 |
| 1  | 0.551514 | I | 0 |
| 24 | 0.676899 | C | 1 |
| 7  | 0.3873   | A | 0 |
| 13 | 0.66352  | C | 1 |
| 10 | 0.678613 | E | 1 |
| 9  | 0.403875 | I | 0 |
| 13 | 0.540884 | C | 1 |
| 21 | 0.324039 | C | 1 |
| 13 | 0.66352  | C | 1 |
| 6  | 0.205747 | C | 1 |
| 16 | 0.657399 | C | 1 |
| 15 | 0.282717 | R | 0 |
| 6  | 0.527367 | C | 1 |
| 20 | 0.371378 | A | 0 |
| 3  | 0.573741 | C | 1 |
| 16 | 0.657399 | C | 1 |
| 7  | 0.294111 | I | 0 |
| 16 | 0.657399 | C | 1 |
| 6  | 0.205747 | C | 1 |
| 3  | 0.726086 | N | 0 |



|    |          |   |   |
|----|----------|---|---|
| 19 | 0.2971   | C | 1 |
| 19 | 0.2971   | C | 1 |
| 24 | 0.676899 | C | 1 |
| 6  | 0.205747 | C | 1 |
| 20 | 0.857071 | C | 1 |
| 19 | 0.2971   | C | 1 |
| 3  | 0.573741 | C | 1 |
| 20 | 0.857071 | C | 1 |
| 6  | 0.527367 | C | 1 |
| 16 | 0.657399 | C | 1 |
| 20 | 0.455623 | C | 1 |
| 9  | 0.403875 | I | 0 |
| 6  | 0.32996  | C | 1 |
| 21 | 0.324039 | C | 1 |
| 8  | 0.219034 | C | 1 |
| 16 | 0.657399 | C | 1 |
| 6  | 0.205747 | C | 1 |
| 6  | 0.527367 | C | 1 |
| 7  | 0.3873   | A | 0 |
| 9  | 0.403875 | I | 0 |
| 1  | 0.551514 | I | 0 |
| 6  | 0.46527  | C | 1 |
| 7  | 0.294111 | I | 0 |
| 20 | 0.455623 | C | 1 |
| 16 | 0.657399 | C | 1 |
| 3  | 0.228423 | C | 1 |
| 15 | 0.282717 | R | 0 |
| 20 | 0.857071 | C | 1 |
| 3  | 0.726086 | N | 0 |
| 6  | 0.32996  | C | 1 |
| 9  | 0.403875 | I | 0 |
| 16 | 0.657399 | C | 1 |
| 2  | 0.662143 | C | 1 |
| 8  | 0.219034 | C | 1 |
| 24 | 0.676899 | C | 1 |
| 7  | 0.294111 | I | 0 |
| 3  | 0.726086 | N | 0 |
| 3  | 0.726086 | N | 0 |
| 6  | 0.567755 | C | 1 |
| 20 | 0.857071 | C | 1 |
| 9  | 0.403875 | I | 0 |
| 3  | 0.228423 | C | 1 |
| 6  | 0.527367 | C | 1 |
| 21 | 0.324039 | C | 1 |
| 7  | 0.3873   | A | 0 |
| 1  | 0.551514 | I | 0 |
| 16 | 0.657399 | C | 1 |
| 2  | 0.662143 | C | 1 |
| 20 | 0.455623 | C | 1 |
| 24 | 0.676899 | C | 1 |
| 16 | 0.657399 | C | 1 |
| 6  | 0.567755 | C | 1 |
| 6  | 0.681079 | F | 0 |
| 16 | 0.657399 | C | 1 |

|    |          |   |   |
|----|----------|---|---|
| 16 | 0.657399 | C | 1 |
| 13 | 0.383706 | C | 1 |
| 3  | 0.228423 | C | 1 |
| 3  | 0.726086 | N | 0 |
| 9  | 0.403875 | I | 0 |
| 21 | 0.324039 | C | 1 |
| 10 | 0.678613 | E | 1 |
| 8  | 0.219034 | C | 1 |
| 13 | 0.66352  | C | 1 |
| 13 | 0.383706 | C | 1 |
| 7  | 0.294111 | I | 0 |
| 24 | 0.676899 | C | 1 |
| 9  | 0.403875 | I | 0 |
| 13 | 0.540884 | C | 1 |
| 9  | 0.403875 | I | 0 |
| 3  | 0.573741 | C | 1 |
| 9  | 0.403875 | I | 0 |
| 3  | 0.573741 | C | 1 |
| 16 | 0.657399 | C | 1 |
| 13 | 0.383706 | C | 1 |
| 10 | 0.678613 | E | 1 |
| 9  | 0.403875 | I | 0 |
| 9  | 0.403875 | I | 0 |
| 6  | 0.205747 | C | 1 |
| 3  | 0.726086 | N | 0 |
| 13 | 0.66352  | C | 1 |
| 6  | 0.527367 | C | 1 |
| 24 | 0.271909 | C | 1 |
| 24 | 0.271909 | C | 1 |
| 24 | 0.271909 | C | 1 |
| 24 | 0.271909 | C | 1 |
| 23 | 0.402814 | C | 1 |
| 23 | 0.402814 | C | 1 |
| 23 | 0.402814 | C | 1 |
| 7  | 0.342816 | C | 1 |
| 7  | 0.342816 | C | 1 |
| 7  | 0.342816 | C | 1 |
| 7  | 0.342816 | C | 1 |
| 7  | 0.342816 | C | 1 |
| 7  | 0.342816 | C | 1 |
| 7  | 0.342816 | C | 1 |
| 7  | 0.342816 | C | 1 |
| 7  | 0.342816 | C | 1 |
| 7  | 0.342816 | C | 1 |
| 21 | 0.528252 | C | 1 |
| 21 | 0.528252 | C | 1 |
| 21 | 0.528252 | C | 1 |
| 21 | 0.528252 | C | 1 |
| 21 | 0.528252 | C | 1 |
| 21 | 0.528252 | C | 1 |
| 21 | 0.48804  | C | 1 |
| 5  | 0.685528 | N | 0 |
| 21 | 0.48804  | C | 1 |
| 5  | 0.685528 | N | 0 |

|    |          |   |   |
|----|----------|---|---|
| 18 | 0.212127 | C | 1 |
| 21 | 0.48804  | C | 1 |
| 5  | 0.685528 | N | 0 |
| 5  | 0.446835 | C | 1 |
| 5  | 0.685528 | N | 0 |
| 21 | 0.48804  | C | 1 |
| 5  | 0.685528 | N | 0 |
| 5  | 0.446835 | C | 1 |
| 5  | 0.685528 | N | 0 |
| 5  | 0.446835 | C | 1 |
| 21 | 0.48804  | C | 1 |
| 21 | 0.48804  | C | 1 |
| 5  | 0.685528 | N | 0 |
| 18 | 0.212127 | C | 1 |
| 21 | 0.48804  | C | 1 |
| 5  | 0.685528 | N | 0 |
| 18 | 0.212127 | C | 1 |
| 21 | 0.48804  | C | 1 |
| 5  | 0.446835 | C | 1 |
| 18 | 0.212127 | C | 1 |
| 21 | 0.48804  | C | 1 |
| 21 | 0.48804  | C | 1 |
| 5  | 0.446835 | C | 1 |
| 5  | 0.685528 | N | 0 |
| 5  | 0.446835 | C | 1 |
| 7  | 0.53084  | C | 1 |
| 3  | 0.292736 | C | 1 |
| 18 | 0.364904 | C | 1 |
| 23 | 0.574916 | F | 0 |
| 5  | 0.240849 | C | 1 |
| 18 | 0.639299 | C | 1 |
| 19 | 0.507963 | C | 1 |
| 23 | 0.922168 | E | 1 |
| 20 | 0.500426 | E | 1 |
| 20 | 0.500426 | E | 1 |
| 23 | 0.922168 | E | 1 |
| 24 | 0.660512 | C | 1 |
| 23 | 0.574916 | F | 0 |
| 21 | 0.892699 | D | 1 |
| 7  | 0.53084  | C | 1 |
| 5  | 0.240849 | C | 1 |
| 23 | 0.922168 | E | 1 |
| 2  | 0.295309 | C | 1 |
| 18 | 0.639299 | C | 1 |
| 5  | 0.240849 | C | 1 |
| 19 | 0.507963 | C | 1 |
| 21 | 0.892699 | D | 1 |
| 5  | 0.240849 | C | 1 |
| 15 | 0.332032 | A | 0 |
| 7  | 0.53084  | C | 1 |
| 3  | 0.292736 | C | 1 |
| 24 | 0.660512 | C | 1 |
| 18 | 0.364904 | C | 1 |
| 7  | 0.53084  | C | 1 |

|    |          |   |   |
|----|----------|---|---|
| 21 | 0.892699 | D | 1 |
| 5  | 0.240849 | C | 1 |
| 23 | 0.922168 | E | 1 |
| 7  | 0.506835 | C | 1 |
| 20 | 0.500426 | E | 1 |
| 7  | 0.53084  | C | 1 |
| 19 | 0.507963 | C | 1 |
| 24 | 0.660512 | C | 1 |
| 24 | 0.660512 | C | 1 |
| 5  | 0.240849 | C | 1 |
| 7  | 0.506835 | C | 1 |
| 20 | 0.500426 | E | 1 |
| 20 | 0.500426 | E | 1 |
| 21 | 0.892699 | D | 1 |
| 23 | 0.922168 | E | 1 |
| 20 | 0.500426 | E | 1 |
| 7  | 0.506835 | C | 1 |
| 21 | 0.622812 | I | 0 |
| 20 | 0.302206 | C | 1 |
| 20 | 0.302206 | C | 1 |
| 17 | 0.763417 | I | 0 |
| 7  | 0.53084  | C | 1 |
| 3  | 0.292736 | C | 1 |
| 2  | 0.088917 | C | 1 |
| 21 | 0.892699 | D | 1 |
| 2  | 0.088917 | C | 1 |
| 24 | 0.660512 | C | 1 |
| 17 | 0.665838 | C | 1 |
| 7  | 0.53084  | C | 1 |
| 23 | 0.922168 | E | 1 |
| 20 | 0.500426 | E | 1 |
| 18 | 0.364904 | C | 1 |
| 7  | 0.506835 | C | 1 |
| 18 | 0.364904 | C | 1 |
| 18 | 0.364904 | C | 1 |
| 17 | 0.763417 | I | 0 |
| 17 | 0.665838 | C | 1 |
| 21 | 0.892699 | D | 1 |
| 7  | 0.53084  | C | 1 |
| 20 | 0.302206 | C | 1 |
| 23 | 0.574916 | F | 0 |
| 15 | 0.231636 | A | 0 |
| 18 | 0.364904 | C | 1 |
| 21 | 0.892699 | D | 1 |
| 18 | 0.364904 | C | 1 |
| 20 | 0.302206 | C | 1 |
| 3  | 0.292736 | C | 1 |
| 17 | 0.763417 | I | 0 |
| 21 | 0.622812 | I | 0 |
| 21 | 0.892699 | D | 1 |
| 18 | 0.639299 | C | 1 |
| 7  | 0.53084  | C | 1 |
| 3  | 0.292736 | C | 1 |
| 15 | 0.332032 | A | 0 |

|    |          |   |   |
|----|----------|---|---|
| 21 | 0.892699 | D | 1 |
| 18 | 0.364904 | C | 1 |
| 5  | 0.240849 | C | 1 |
| 3  | 0.292736 | C | 1 |
| 23 | 0.922168 | E | 1 |
| 24 | 0.660512 | C | 1 |
| 24 | 0.660512 | C | 1 |
| 5  | 0.240849 | C | 1 |
| 3  | 0.292736 | C | 1 |
| 18 | 0.364904 | C | 1 |
| 17 | 0.665838 | C | 1 |
| 23 | 0.922168 | E | 1 |
| 23 | 0.574916 | F | 0 |
| 20 | 0.500426 | E | 1 |
| 7  | 0.53084  | C | 1 |
| 21 | 0.622812 | I | 0 |
| 5  | 0.240849 | C | 1 |
| 2  | 0.295309 | C | 1 |
| 18 | 0.364904 | C | 1 |
| 5  | 0.240849 | C | 1 |
| 21 | 0.892699 | D | 1 |
| 17 | 0.763417 | I | 0 |
| 23 | 0.922168 | E | 1 |
| 17 | 0.763417 | I | 0 |
| 21 | 0.892699 | D | 1 |
| 3  | 0.292736 | C | 1 |
| 17 | 0.665838 | C | 1 |
| 2  | 0.088917 | C | 1 |
| 7  | 0.53084  | C | 1 |
| 7  | 0.53084  | C | 1 |
| 21 | 0.622812 | I | 0 |
| 15 | 0.231636 | A | 0 |
| 7  | 0.506835 | C | 1 |
| 20 | 0.500426 | E | 1 |
| 7  | 0.53084  | C | 1 |
| 15 | 0.231636 | A | 0 |
| 19 | 0.507963 | C | 1 |
| 21 | 0.622812 | I | 0 |
| 20 | 0.302206 | C | 1 |
| 20 | 0.302206 | C | 1 |
| 20 | 0.500426 | E | 1 |
| 19 | 0.507963 | C | 1 |
| 21 | 0.892699 | D | 1 |
| 17 | 0.665838 | C | 1 |
| 3  | 0.292736 | C | 1 |
| 3  | 0.292736 | C | 1 |
| 18 | 0.364904 | C | 1 |
| 17 | 0.665838 | C | 1 |
| 15 | 0.332032 | A | 0 |
| 17 | 0.763417 | I | 0 |
| 24 | 0.660512 | C | 1 |
| 7  | 0.53084  | C | 1 |
| 7  | 0.506835 | C | 1 |
| 3  | 0.292736 | C | 1 |

|    |          |   |   |
|----|----------|---|---|
| 3  | 0.292736 | C | 1 |
| 23 | 0.922168 | E | 1 |
| 17 | 0.763417 | I | 0 |
| 19 | 0.507963 | C | 1 |
| 18 | 0.639299 | C | 1 |
| 7  | 0.53084  | C | 1 |
| 7  | 0.53084  | C | 1 |
| 20 | 0.500426 | E | 1 |
| 3  | 0.292736 | C | 1 |
| 18 | 0.364904 | C | 1 |
| 23 | 0.922168 | E | 1 |
| 20 | 0.500426 | E | 1 |
| 23 | 0.574916 | F | 0 |
| 20 | 0.500426 | E | 1 |
| 24 | 0.660512 | C | 1 |
| 2  | 0.295309 | C | 1 |
| 18 | 0.639299 | C | 1 |
| 20 | 0.500426 | E | 1 |
| 23 | 0.574916 | F | 0 |
| 23 | 0.922168 | E | 1 |
| 21 | 0.622812 | I | 0 |
| 18 | 0.854719 | C | 1 |
| 18 | 0.854719 | C | 1 |
| 18 | 0.854719 | C | 1 |
| 18 | 0.854719 | C | 1 |
| 18 | 0.854719 | C | 1 |
| 18 | 0.854719 | C | 1 |
| 18 | 0.854719 | C | 1 |
| 18 | 0.854719 | C | 1 |
| 17 | 0.760496 | C | 1 |
| 10 | 0.474157 | C | 1 |
| 10 | 0.474157 | C | 1 |
| 10 | 0.474157 | C | 1 |
| 17 | 0.760496 | C | 1 |
| 17 | 0.760496 | C | 1 |
| 10 | 0.474157 | C | 1 |
| 17 | 0.760496 | C | 1 |
| 17 | 0.760496 | C | 1 |
| 17 | 0.760496 | C | 1 |
| 10 | 0.474157 | C | 1 |
| 6  | 0.360478 | C | 1 |
| 6  | 0.360478 | C | 1 |
| 6  | 0.360478 | C | 1 |
| 6  | 0.360478 | C | 1 |
| 6  | 0.360478 | C | 1 |
| 6  | 0.360478 | C | 1 |
| 6  | 0.360478 | C | 1 |
| 6  | 0.360478 | C | 1 |
| 6  | 0.360478 | C | 1 |
| 6  | 0.360478 | C | 1 |
| 10 | 0.359891 | C | 1 |
| 2  | 0.356056 | A | 0 |
| 10 | 0.359891 | C | 1 |
| 10 | 0.359891 | C | 1 |

|                |   |
|----------------|---|
| 10 0. 359891 C | 1 |
| 10 0. 359891 C | 1 |
| 10 0. 359891 C | 1 |
| 2 0. 356056 A  | 0 |
| 2 0. 356056 A  | 0 |
| 10 0. 359891 C | 1 |
| 2 0. 356056 A  | 0 |
| 2 0. 356056 A  | 0 |
| 2 0. 356056 A  | 0 |
| 2 0. 356056 A  | 0 |
| 10 0. 359891 C | 1 |
| 10 0. 359891 C | 1 |
| 10 0. 359891 C | 1 |
| 10 0. 359891 C | 1 |
| 10 0. 359891 C | 1 |
| 10 0. 359891 C | 1 |
| 20 0. 199601 C | 1 |
| 13 0. 186877 C | 1 |
| 20 0. 199601 C | 1 |
| 6 0. 428064 F  | 0 |
| 19 0. 633015 C | 1 |
| 19 0. 863053 C | 1 |
| 19 0. 863053 C | 1 |
| 19 0. 863053 C | 1 |
| 17 0. 633695 B | 1 |
| 14 0. 805696 F | 0 |
| 19 0. 863053 C | 1 |
| 19 0. 863053 C | 1 |
| 14 0. 805696 F | 0 |
| 14 0. 805696 F | 0 |
| 20 0. 199601 C | 1 |
| 20 0. 199601 C | 1 |
| 14 0. 805696 F | 0 |
| 19 0. 863053 C | 1 |
| 6 0. 428064 F  | 0 |
| 20 0. 199601 C | 1 |
| 17 0. 556514 B | 1 |
| 17 0. 633695 B | 1 |
| 20 0. 199601 C | 1 |
| 17 0. 633695 B | 1 |
| 20 0. 199601 C | 1 |
| 17 0. 556514 B | 1 |
| 21 0. 589444 C | 1 |
| 13 0. 186877 C | 1 |
| 13 0. 186877 C | 1 |
| 19 0. 863053 C | 1 |
| 2 0. 425666 C  | 1 |
| 17 0. 633695 B | 1 |
| 14 0. 805696 F | 0 |
| 2 0. 425666 C  | 1 |
| 19 0. 633015 C | 1 |
| 20 0. 199601 C | 1 |
| 20 0. 199601 C | 1 |
| 14 0. 805696 F | 0 |

|    |          |   |   |
|----|----------|---|---|
| 19 | 0.633015 | C | 1 |
| 13 | 0.186877 | C | 1 |
| 20 | 0.199601 | C | 1 |
| 20 | 0.199601 | C | 1 |
| 21 | 0.589444 | C | 1 |
| 20 | 0.199601 | C | 1 |
| 20 | 0.199601 | C | 1 |
| 2  | 0.425666 | C | 1 |
| 21 | 0.589444 | C | 1 |
| 14 | 0.805696 | F | 0 |
| 19 | 0.633015 | C | 1 |
| 13 | 0.186877 | C | 1 |
| 17 | 0.556514 | B | 1 |
| 14 | 0.805696 | F | 0 |
| 17 | 0.556514 | B | 1 |
| 20 | 0.199601 | C | 1 |
| 14 | 0.805696 | F | 0 |
| 13 | 0.186877 | C | 1 |
| 19 | 0.633015 | C | 1 |
| 17 | 0.556514 | B | 1 |
| 14 | 0.805696 | F | 0 |
| 14 | 0.805696 | F | 0 |
| 13 | 0.186877 | C | 1 |
| 6  | 0.428064 | F | 0 |
| 14 | 0.805696 | F | 0 |
| 19 | 0.863053 | C | 1 |
| 21 | 0.589444 | C | 1 |
| 20 | 0.923242 | C | 1 |
| 3  | 0.331773 | C | 1 |
| 20 | 0.923242 | C | 1 |
| 20 | 0.923242 | C | 1 |
| 20 | 0.923242 | C | 1 |
| 3  | 0.331773 | C | 1 |
| 20 | 0.923242 | C | 1 |
| 3  | 0.331773 | C | 1 |
| 3  | 0.331773 | C | 1 |
| 3  | 0.331773 | C | 1 |
| 1  | 0.18483  | C | 1 |
| 2  | 0.250413 | C | 1 |
| 1  | 0.18483  | C | 1 |
| 1  | 0.18483  | C | 1 |
| 2  | 0.250413 | C | 1 |
| 1  | 0.18483  | C | 1 |
| 2  | 0.250413 | C | 1 |
| 1  | 0.18483  | C | 1 |
| 19 | 0.406967 | C | 1 |
| 19 | 0.406967 | C | 1 |
| 19 | 0.406967 | C | 1 |
| 19 | 0.406967 | C | 1 |
| 7  | 0.714011 | C | 1 |
| 7  | 0.714011 | C | 1 |
| 7  | 0.714011 | C | 1 |



|                |   |
|----------------|---|
| 7 0. 714011 C  | 1 |
| 19 0. 406967 C | 1 |
| 7 0. 714011 C  | 1 |
| 7 0. 714011 C  | 1 |
| 19 0. 406967 C | 1 |
| 7 0. 714011 C  | 1 |
| 7 0. 714011 C  | 1 |
| 19 0. 406967 C | 1 |
| 7 0. 714011 C  | 1 |
| 7 0. 714011 C  | 1 |
| 19 0. 406967 C | 1 |
| 19 0. 406967 C | 1 |
| 19 0. 406967 C | 1 |
| 7 0. 714011 C  | 1 |
| 16 0. 796261 C | 1 |
| 6 0. 619278 C  | 1 |
| 6 0. 619278 C  | 1 |
| 16 0. 796261 C | 1 |
| 18 0. 166925 D | 1 |
| 18 0. 166925 D | 1 |
| 18 0. 166925 D | 1 |
| 6 0. 619278 C  | 1 |
| 6 0. 619278 C  | 1 |
| 16 0. 796261 C | 1 |
| 6 0. 619278 C  | 1 |
| 6 0. 619278 C  | 1 |
| 18 0. 166925 D | 1 |
| 6 0. 619278 C  | 1 |
| 18 0. 166925 D | 1 |
| 6 0. 619278 C  | 1 |
| 6 0. 619278 C  | 1 |
| 6 0. 619278 C  | 1 |
| 18 0. 166925 D | 1 |
| 6 0. 619278 C  | 1 |
| 18 0. 166925 D | 1 |
| 19 0. 547686 N | 0 |
| 18 0. 672695 C | 1 |
| 17 0. 490054 C | 1 |
| 18 0. 672695 C | 1 |
| 19 0. 547686 N | 0 |
| 21 0. 923242 C | 1 |
| 21 0. 923242 C | 1 |
| 18 0. 672695 C | 1 |
| 21 0. 923242 C | 1 |
| 18 0. 672695 C | 1 |
| 19 0. 547686 N | 0 |
| 18 0. 672695 C | 1 |
| 17 0. 490054 C | 1 |
| 21 0. 923242 C | 1 |
| 19 0. 547686 N | 0 |
| 19 0. 547686 N | 0 |
| 18 0. 672695 C | 1 |
| 18 0. 672695 C | 1 |
| 18 0. 672695 C | 1 |

|                |   |
|----------------|---|
| 19 0. 547686 N | 0 |
| 18 0. 672695 C | 1 |
| 19 0. 547686 N | 0 |
| 19 0. 547686 N | 0 |
| 19 0. 547686 N | 0 |
| 17 0. 490054 C | 1 |
| 19 0. 547686 N | 0 |
| 17 0. 490054 C | 1 |
| 21 0. 923242 C | 1 |
| 21 0. 923242 C | 1 |
| 17 0. 490054 C | 1 |
| 17 0. 490054 C | 1 |
| 19 0. 547686 N | 0 |
| 19 0. 547686 N | 0 |
| 21 0. 923242 C | 1 |
| 21 0. 923242 C | 1 |
| 21 0. 923242 C | 1 |
| 18 0. 672695 C | 1 |
| 17 0. 490054 C | 1 |
| 18 0. 672695 C | 1 |
| 18 0. 672695 C | 1 |
| 19 0. 547686 N | 0 |
| 18 0. 672695 C | 1 |
| 17 0. 490054 C | 1 |
| 21 0. 923242 C | 1 |
| 21 0. 923242 C | 1 |
| 21 0. 923242 C | 1 |
| 21 0. 923242 C | 1 |
| 21 0. 923242 C | 1 |
| 17 0. 490054 C | 1 |
| 17 0. 490054 C | 1 |
| 18 0. 672695 C | 1 |
| 19 0. 547686 N | 0 |
| 19 0. 547686 N | 0 |
| 7 0. 474965 C  | 1 |
| 7 0. 474965 C  | 1 |
| 7 0. 474965 C  | 1 |
| 10 0. 542348 C | 1 |
| 7 0. 474965 C  | 1 |
| 10 0. 542348 C | 1 |
| 10 0. 542348 C | 1 |
| 10 0. 542348 C | 1 |
| 7 0. 474965 C  | 1 |
| 10 0. 542348 C | 1 |
| 10 0. 542348 C | 1 |
| 7 0. 474965 C  | 1 |
| 7 0. 474965 C  | 1 |
| 10 0. 542348 C | 1 |
| 7 0. 474965 C  | 1 |
| 7 0. 474965 C  | 1 |
| 10 0. 542348 C | 1 |
| 7 0. 474965 C  | 1 |
| 10 0. 542348 C | 1 |
| 10 0. 542348 C | 1 |

|    |          |   |   |
|----|----------|---|---|
| 10 | 0.542348 | C | 1 |
| 10 | 0.542348 | C | 1 |
| 7  | 0.474965 | C | 1 |
| 23 | 0.495297 | C | 1 |
| 19 | 0.58679  | C | 1 |
| 15 | 0.459165 | C | 1 |
| 15 | 0.299062 | C | 1 |
| 23 | 0.495297 | C | 1 |
| 19 | 0.58679  | C | 1 |
| 19 | 0.58679  | C | 1 |
| 19 | 0.58679  | C | 1 |
| 19 | 0.58679  | C | 1 |
| 19 | 0.58679  | C | 1 |
| 15 | 0.299062 | C | 1 |
| 23 | 0.495297 | C | 1 |
| 23 | 0.495297 | C | 1 |
| 23 | 0.495297 | C | 1 |
| 19 | 0.58679  | C | 1 |
| 15 | 0.299062 | C | 1 |
| 15 | 0.299062 | C | 1 |
| 15 | 0.459165 | C | 1 |
| 15 | 0.459165 | C | 1 |
| 23 | 0.495297 | C | 1 |
| 19 | 0.58679  | C | 1 |
| 19 | 0.58679  | C | 1 |
| 23 | 0.495297 | C | 1 |
| 19 | 0.58679  | C | 1 |
| 19 | 0.58679  | C | 1 |
| 19 | 0.58679  | C | 1 |
| 15 | 0.459165 | C | 1 |
| 19 | 0.58679  | C | 1 |
| 19 | 0.58679  | C | 1 |
| 15 | 0.299062 | C | 1 |
| 15 | 0.459165 | C | 1 |
| 19 | 0.58679  | C | 1 |
| 19 | 0.58679  | C | 1 |
| 23 | 0.495297 | C | 1 |
| 23 | 0.495297 | C | 1 |
| 15 | 0.459165 | C | 1 |
| 19 | 0.58679  | C | 1 |
| 1  | 0.098316 | C | 1 |
| 9  | 0.206544 | C | 1 |
| 2  | 0.202541 | C | 1 |
| 19 | 0.494019 | C | 1 |
| 2  | 0.248336 | C | 1 |
| 9  | 0.206544 | C | 1 |
| 19 | 0.494019 | C | 1 |
| 9  | 0.206544 | C | 1 |
| 19 | 0.494019 | C | 1 |
| 1  | 0.098316 | C | 1 |
| 9  | 0.206544 | C | 1 |
| 9  | 0.206544 | C | 1 |
| 2  | 0.248336 | C | 1 |
| 9  | 0.206544 | C | 1 |

|    |          |   |   |
|----|----------|---|---|
| 19 | 0.494019 | C | 1 |
| 9  | 0.206544 | C | 1 |
| 2  | 0.202541 | C | 1 |
| 2  | 0.202541 | C | 1 |
| 2  | 0.202541 | C | 1 |
| 19 | 0.494019 | C | 1 |
| 9  | 0.206544 | C | 1 |
| 19 | 0.494019 | C | 1 |
| 19 | 0.494019 | C | 1 |
| 9  | 0.206544 | C | 1 |
| 19 | 0.494019 | C | 1 |
| 1  | 0.098316 | C | 1 |
| 9  | 0.206544 | C | 1 |
| 2  | 0.202541 | C | 1 |
| 9  | 0.206544 | C | 1 |
| 9  | 0.206544 | C | 1 |
| 9  | 0.206544 | C | 1 |
| 2  | 0.473569 | C | 1 |
| 19 | 0.494019 | C | 1 |
| 9  | 0.206544 | C | 1 |
| 19 | 0.494019 | C | 1 |
| 19 | 0.494019 | C | 1 |
| 19 | 0.494019 | C | 1 |
| 19 | 0.494019 | C | 1 |
| 1  | 0.098316 | C | 1 |
| 2  | 0.248336 | C | 1 |
| 9  | 0.206544 | C | 1 |
| 2  | 0.473569 | C | 1 |
| 2  | 0.248336 | C | 1 |
| 9  | 0.206544 | C | 1 |
| 19 | 0.494019 | C | 1 |
| 9  | 0.206544 | C | 1 |
| 9  | 0.206544 | C | 1 |
| 2  | 0.248336 | C | 1 |
| 9  | 0.206544 | C | 1 |
| 2  | 0.473569 | C | 1 |
| 2  | 0.202541 | C | 1 |
| 19 | 0.494019 | C | 1 |
| 1  | 0.098316 | C | 1 |
| 8  | 0.318166 | C | 1 |
| 6  | 0.38475  | C | 1 |
| 8  | 0.318166 | C | 1 |
| 8  | 0.318166 | C | 1 |
| 6  | 0.38475  | C | 1 |
| 8  | 0.318166 | C | 1 |
| 6  | 0.183289 | C | 1 |
| 8  | 0.318166 | C | 1 |
| 6  | 0.38475  | C | 1 |
| 6  | 0.183289 | C | 1 |
| 8  | 0.318166 | C | 1 |
| 6  | 0.183289 | C | 1 |
| 6  | 0.183289 | C | 1 |
| 6  | 0.183289 | C | 1 |
| 8  | 0.248902 | C | 1 |

|               |   |
|---------------|---|
| 6 0.254444 N  | 0 |
| 8 0.248902 C  | 1 |
| 6 0.254444 N  | 0 |
| 20 0.328778 C | 1 |
| 20 0.328778 C | 1 |
| 18 0.466004 C | 1 |
| 8 0.248902 C  | 1 |
| 20 0.163197 C | 1 |
| 8 0.248902 C  | 1 |
| 1 0.570718 M  | 0 |
| 6 0.254444 N  | 0 |
| 20 0.328778 C | 1 |
| 13 0.491252 C | 1 |
| 13 0.491252 C | 1 |
| 20 0.163197 C | 1 |
| 6 0.254444 N  | 0 |
| 6 0.254444 N  | 0 |
| 20 0.163197 C | 1 |
| 18 0.466004 C | 1 |
| 18 0.466004 C | 1 |
| 18 0.466004 C | 1 |
| 18 0.466004 C | 1 |
| 20 0.163197 C | 1 |
| 18 0.466004 C | 1 |
| 18 0.466004 C | 1 |
| 8 0.248902 C  | 1 |
| 1 0.570718 M  | 0 |
| 1 0.570718 M  | 0 |
| 18 0.466004 C | 1 |
| 8 0.248902 C  | 1 |
| 13 0.491252 C | 1 |
| 18 0.466004 C | 1 |
| 13 0.491252 C | 1 |
| 18 0.466004 C | 1 |
| 13 0.491252 C | 1 |
| 6 0.254444 N  | 0 |
| 18 0.466004 C | 1 |
| 1 0.570718 M  | 0 |
| 20 0.163197 C | 1 |
| 6 0.254444 N  | 0 |
| 1 0.570718 M  | 0 |
| 13 0.491252 C | 1 |
| 18 0.466004 C | 1 |
| 8 0.248902 C  | 1 |
| 18 0.466004 C | 1 |
| 2 0.310163 C  | 1 |
| 1 0.188643 C  | 1 |
| 21 0.829161 F | 0 |
| 21 0.829161 F | 0 |
| 6 0.102736 C  | 1 |
| 6 0.376736 C  | 1 |
| 6 0.370841 C  | 1 |
| 3 0.357031 C  | 1 |
| 6 0.194266 C  | 1 |

|    |          |   |   |
|----|----------|---|---|
| 7  | 0.165389 | C | 1 |
| 6  | 0.194266 | C | 1 |
| 15 | 0.630048 | K | 1 |
| 7  | 0.101475 | C | 1 |
| 6  | 0.209759 | C | 1 |
| 6  | 0.428501 | C | 1 |
| 2  | 0.310163 | C | 1 |
| 15 | 0.630048 | K | 1 |
| 21 | 0.829161 | F | 0 |
| 21 | 0.829161 | F | 0 |
| 7  | 0.101475 | C | 1 |
| 2  | 0.310163 | C | 1 |
| 6  | 0.209759 | C | 1 |
| 3  | 0.357031 | C | 1 |
| 20 | 0.364926 | R | 0 |
| 21 | 0.829161 | F | 0 |
| 7  | 0.101475 | C | 1 |
| 6  | 0.370841 | C | 1 |
| 15 | 0.630048 | K | 1 |
| 15 | 0.630048 | K | 1 |
| 2  | 0.12968  | C | 1 |
| 15 | 0.630048 | K | 1 |
| 6  | 0.209759 | C | 1 |
| 6  | 0.209759 | C | 1 |
| 7  | 0.101475 | C | 1 |
| 6  | 0.428501 | C | 1 |
| 2  | 0.310163 | C | 1 |
| 21 | 0.829161 | F | 0 |
| 21 | 0.829161 | F | 0 |
| 3  | 0.161437 | C | 1 |
| 2  | 0.310163 | C | 1 |
| 6  | 0.102736 | C | 1 |
| 23 | 0.391236 | C | 1 |
| 3  | 0.161437 | C | 1 |
| 7  | 0.302576 | C | 1 |
| 5  | 0.086892 | C | 1 |
| 1  | 0.188643 | C | 1 |
| 6  | 0.194266 | C | 1 |
| 5  | 0.086892 | C | 1 |
| 5  | 0.086892 | C | 1 |
| 2  | 0.310163 | C | 1 |
| 21 | 0.829161 | F | 0 |
| 21 | 0.829161 | F | 0 |
| 3  | 0.161437 | C | 1 |
| 2  | 0.310163 | C | 1 |
| 6  | 0.370841 | C | 1 |
| 2  | 0.12968  | C | 1 |
| 1  | 0.175066 | C | 1 |
| 23 | 0.391236 | C | 1 |
| 6  | 0.549448 | C | 1 |
| 6  | 0.390372 | N | 0 |
| 21 | 0.829161 | F | 0 |
| 6  | 0.209759 | C | 1 |
| 7  | 0.302576 | C | 1 |

|    |          |   |   |
|----|----------|---|---|
| 21 | 0.829161 | F | 0 |
| 21 | 0.829161 | F | 0 |
| 6  | 0.370841 | C | 1 |
| 21 | 0.829161 | F | 0 |
| 6  | 0.194266 | C | 1 |
| 7  | 0.101475 | C | 1 |
| 7  | 0.165389 | C | 1 |
| 6  | 0.390372 | N | 0 |
| 7  | 0.165389 | C | 1 |
| 1  | 0.209737 | C | 1 |
| 6  | 0.549448 | C | 1 |
| 21 | 0.829161 | F | 0 |
| 6  | 0.428501 | C | 1 |
| 6  | 0.390372 | N | 0 |
| 23 | 0.391236 | C | 1 |
| 1  | 0.175066 | C | 1 |
| 6  | 0.390372 | N | 0 |
| 21 | 0.829161 | F | 0 |
| 6  | 0.390372 | N | 0 |
| 21 | 0.829161 | F | 0 |
| 1  | 0.175066 | C | 1 |
| 20 | 0.364926 | R | 0 |
| 3  | 0.161437 | C | 1 |
| 2  | 0.12968  | C | 1 |
| 1  | 0.188643 | C | 1 |
| 21 | 0.829161 | F | 0 |
| 21 | 0.829161 | F | 0 |
| 3  | 0.161437 | C | 1 |
| 7  | 0.101475 | C | 1 |
| 6  | 0.428501 | C | 1 |
| 7  | 0.302576 | C | 1 |
| 3  | 0.357031 | C | 1 |
| 6  | 0.194266 | C | 1 |
| 6  | 0.194266 | C | 1 |
| 7  | 0.165389 | C | 1 |
| 6  | 0.428501 | C | 1 |
| 6  | 0.370841 | C | 1 |
| 7  | 0.101475 | C | 1 |
| 7  | 0.165389 | C | 1 |
| 2  | 0.310163 | C | 1 |
| 2  | 0.310163 | C | 1 |
| 7  | 0.165389 | C | 1 |
| 21 | 0.829161 | F | 0 |
| 2  | 0.12968  | C | 1 |
| 6  | 0.390372 | N | 0 |
| 6  | 0.428501 | C | 1 |
| 6  | 0.209759 | C | 1 |
| 21 | 0.829161 | F | 0 |
| 6  | 0.209759 | C | 1 |
| 6  | 0.194266 | C | 1 |
| 5  | 0.086892 | C | 1 |
| 6  | 0.102736 | C | 1 |
| 23 | 0.391236 | C | 1 |
| 20 | 0.364926 | R | 0 |

|    |          |   |   |
|----|----------|---|---|
| 6  | 0.390372 | N | 0 |
| 6  | 0.370841 | C | 1 |
| 3  | 0.357031 | C | 1 |
| 21 | 0.829161 | F | 0 |
| 6  | 0.390372 | N | 0 |
| 1  | 0.209737 | C | 1 |
| 7  | 0.165389 | C | 1 |
| 6  | 0.376736 | C | 1 |
| 6  | 0.102736 | C | 1 |
| 6  | 0.549448 | C | 1 |
| 6  | 0.549448 | C | 1 |
| 21 | 0.829161 | F | 0 |
| 2  | 0.310163 | C | 1 |
| 6  | 0.428501 | C | 1 |
| 21 | 0.829161 | F | 0 |
| 5  | 0.086892 | C | 1 |
| 7  | 0.165389 | C | 1 |
| 6  | 0.370841 | C | 1 |
| 20 | 0.364926 | R | 0 |
| 15 | 0.630048 | K | 1 |
| 7  | 0.302576 | C | 1 |
| 6  | 0.390372 | N | 0 |
| 6  | 0.376736 | C | 1 |
| 20 | 0.364926 | R | 0 |
| 21 | 0.829161 | F | 0 |
| 3  | 0.161437 | C | 1 |
| 3  | 0.357031 | C | 1 |
| 7  | 0.302576 | C | 1 |
| 2  | 0.12968  | C | 1 |
| 7  | 0.302576 | C | 1 |
| 21 | 0.829161 | F | 0 |
| 7  | 0.101475 | C | 1 |
| 15 | 0.630048 | K | 1 |
| 6  | 0.390372 | N | 0 |
| 6  | 0.102736 | C | 1 |
| 6  | 0.370841 | C | 1 |
| 7  | 0.165389 | C | 1 |
| 2  | 0.310163 | C | 1 |
| 6  | 0.194266 | C | 1 |
| 23 | 0.391236 | C | 1 |
| 1  | 0.188643 | C | 1 |
| 3  | 0.161437 | C | 1 |
| 2  | 0.310163 | C | 1 |
| 2  | 0.12968  | C | 1 |
| 15 | 0.630048 | K | 1 |
| 2  | 0.12968  | C | 1 |
| 3  | 0.161437 | C | 1 |
| 21 | 0.829161 | F | 0 |
| 1  | 0.209737 | C | 1 |
| 6  | 0.549448 | C | 1 |
| 19 | 0.609715 | C | 1 |
| 19 | 0.609715 | C | 1 |
| 19 | 0.609715 | C | 1 |
| 19 | 0.609715 | C | 1 |



|    |          |   |   |
|----|----------|---|---|
| 19 | 0.609715 | C | 1 |
| 19 | 0.609715 | C | 1 |
| 19 | 0.609715 | C | 1 |
| 19 | 0.609715 | C | 1 |
| 19 | 0.609715 | C | 1 |
| 23 | 0.699373 | C | 1 |
| 23 | 0.699373 | C | 1 |
| 16 | 0.522785 | C | 1 |
| 16 | 0.522785 | C | 1 |
| 16 | 0.522785 | C | 1 |
| 16 | 0.522785 | C | 1 |
| 23 | 0.699373 | C | 1 |
| 23 | 0.699373 | C | 1 |
| 16 | 0.522785 | C | 1 |
| 23 | 0.699373 | C | 1 |
| 16 | 0.522785 | C | 1 |
| 16 | 0.522785 | C | 1 |
| 16 | 0.522785 | C | 1 |
| 16 | 0.522785 | C | 1 |
| 23 | 0.699373 | C | 1 |
| 16 | 0.522785 | C | 1 |
| 23 | 0.699373 | C | 1 |
| 23 | 0.699373 | C | 1 |
| 16 | 0.522785 | C | 1 |
| 23 | 0.699373 | C | 1 |
| 23 | 0.699373 | C | 1 |
| 6  | 0.654542 | I | 0 |
| 5  | 0.411266 | C | 1 |
| 10 | 0.180306 | C | 1 |
| 6  | 0.225057 | C | 1 |
| 6  | 0.437886 | C | 1 |
| 8  | 0.193606 | C | 1 |
| 5  | 0.482796 | B | 1 |
| 6  | 0.318276 | C | 1 |
| 8  | 0.193606 | C | 1 |
| 14 | 0.715269 | G | 0 |
| 7  | 0.579714 | C | 1 |
| 2  | 0.279042 | M | 0 |
| 1  | 0.285403 | C | 1 |
| 2  | 0.264621 | C | 1 |
| 5  | 0.411266 | C | 1 |
| 8  | 0.480495 | C | 1 |
| 8  | 0.480495 | C | 1 |
| 6  | 0.318276 | C | 1 |
| 14 | 0.715269 | G | 0 |
| 5  | 0.411266 | C | 1 |
| 16 | 0.319677 | C | 1 |
| 12 | 0.64045  | C | 1 |
| 7  | 0.710228 | C | 1 |
| 6  | 0.318276 | C | 1 |
| 13 | 0.430893 | C | 1 |
| 11 | 0.833217 | E | 1 |
| 6  | 0.232952 | C | 1 |
| 5  | 0.552434 | D | 1 |

|    |          |   |   |
|----|----------|---|---|
| 12 | 0.64045  | C | 1 |
| 12 | 0.64045  | C | 1 |
| 5  | 0.552434 | D | 1 |
| 20 | 0.500616 | D | 1 |
| 24 | 0.729466 | C | 1 |
| 7  | 0.293008 | C | 1 |
| 6  | 0.232952 | C | 1 |
| 2  | 0.264621 | C | 1 |
| 6  | 0.437886 | C | 1 |
| 2  | 0.279042 | M | 0 |
| 19 | 0.427832 | G | 0 |
| 8  | 0.480495 | C | 1 |
| 5  | 0.411266 | C | 1 |
| 20 | 0.500616 | D | 1 |
| 10 | 0.282222 | C | 1 |
| 8  | 0.480495 | C | 1 |
| 24 | 0.419242 | H | 0 |
| 1  | 0.285403 | C | 1 |
| 7  | 0.275228 | C | 1 |
| 1  | 0.3277   | C | 1 |
| 13 | 0.430893 | C | 1 |
| 1  | 0.159203 | C | 1 |
| 20 | 0.500616 | D | 1 |
| 6  | 0.303852 | C | 1 |
| 7  | 0.275228 | C | 1 |
| 13 | 0.515825 | C | 1 |
| 24 | 0.617673 | C | 1 |
| 21 | 0.235875 | C | 1 |
| 6  | 0.437886 | C | 1 |
| 7  | 0.710228 | C | 1 |
| 10 | 0.180306 | C | 1 |
| 5  | 0.218209 | I | 0 |
| 2  | 0.109461 | C | 1 |
| 1  | 0.087352 | C | 1 |
| 8  | 0.480495 | C | 1 |
| 10 | 0.252693 | C | 1 |
| 8  | 0.480495 | C | 1 |
| 5  | 0.411266 | C | 1 |
| 10 | 0.222205 | C | 1 |
| 8  | 0.448001 | C | 1 |
| 6  | 0.437886 | C | 1 |
| 5  | 0.225204 | C | 1 |
| 8  | 0.448001 | C | 1 |
| 10 | 0.282222 | C | 1 |
| 8  | 0.448001 | C | 1 |
| 10 | 0.282222 | C | 1 |
| 7  | 0.710228 | C | 1 |
| 10 | 0.282222 | C | 1 |
| 5  | 0.411266 | C | 1 |
| 8  | 0.480495 | C | 1 |
| 7  | 0.469524 | L | 0 |
| 11 | 0.31334  | C | 1 |
| 10 | 0.282222 | C | 1 |
| 10 | 0.282222 | C | 1 |

|    |          |   |   |
|----|----------|---|---|
| 21 | 0.235875 | C | 1 |
| 2  | 0.136388 | I | 0 |
| 11 | 0.31334  | C | 1 |
| 5  | 0.411266 | C | 1 |
| 13 | 0.430893 | C | 1 |
| 7  | 0.710228 | C | 1 |
| 1  | 0.087352 | C | 1 |
| 8  | 0.480495 | C | 1 |
| 10 | 0.282222 | C | 1 |
| 6  | 0.232952 | C | 1 |
| 20 | 0.500616 | D | 1 |
| 6  | 0.318276 | C | 1 |
| 13 | 0.515825 | C | 1 |
| 7  | 0.315676 | I | 0 |
| 12 | 0.64045  | C | 1 |
| 2  | 0.279042 | M | 0 |
| 2  | 0.45151  | C | 1 |
| 2  | 0.45151  | C | 1 |
| 10 | 0.252693 | C | 1 |
| 1  | 0.425134 | C | 1 |
| 7  | 0.275228 | C | 1 |
| 6  | 0.654542 | I | 0 |
| 7  | 0.315676 | I | 0 |
| 7  | 0.710228 | C | 1 |
| 20 | 0.500616 | D | 1 |
| 5  | 0.411266 | C | 1 |
| 11 | 0.31334  | C | 1 |
| 13 | 0.515825 | C | 1 |
| 6  | 0.303852 | C | 1 |
| 13 | 0.430893 | C | 1 |
| 6  | 0.232952 | C | 1 |
| 8  | 0.448001 | C | 1 |
| 21 | 0.235875 | C | 1 |
| 24 | 0.729466 | C | 1 |
| 10 | 0.252693 | C | 1 |
| 5  | 0.506672 | I | 0 |
| 10 | 0.222205 | C | 1 |
| 7  | 0.275228 | C | 1 |
| 14 | 0.715269 | G | 0 |
| 11 | 0.833217 | E | 1 |
| 10 | 0.252693 | C | 1 |
| 6  | 0.654542 | I | 0 |
| 24 | 0.581694 | D | 1 |
| 5  | 0.270498 | C | 1 |
| 13 | 0.430893 | C | 1 |
| 10 | 0.252693 | C | 1 |
| 7  | 0.293008 | C | 1 |
| 13 | 0.321237 | L | 0 |
| 10 | 0.180306 | C | 1 |
| 20 | 0.500616 | D | 1 |
| 10 | 0.252693 | C | 1 |
| 7  | 0.293008 | C | 1 |
| 7  | 0.293008 | C | 1 |
| 21 | 0.235875 | C | 1 |

|    |          |   |   |
|----|----------|---|---|
| 2  | 0.136388 | I | 0 |
| 1  | 0.425134 | C | 1 |
| 8  | 0.480495 | C | 1 |
| 5  | 0.482796 | B | 1 |
| 8  | 0.448001 | C | 1 |
| 13 | 0.515825 | C | 1 |
| 13 | 0.321237 | L | 0 |
| 5  | 0.411266 | C | 1 |
| 21 | 0.475888 | I | 0 |
| 13 | 0.515825 | C | 1 |
| 5  | 0.411266 | C | 1 |
| 1  | 0.159203 | C | 1 |
| 9  | 0.617293 | C | 1 |
| 10 | 0.252693 | C | 1 |
| 11 | 0.833217 | E | 1 |
| 8  | 0.480495 | C | 1 |
| 10 | 0.252693 | C | 1 |
| 16 | 0.319677 | C | 1 |
| 19 | 0.427832 | G | 0 |
| 7  | 0.275228 | C | 1 |
| 8  | 0.448001 | C | 1 |
| 2  | 0.45151  | C | 1 |
| 16 | 0.319677 | C | 1 |
| 6  | 0.437886 | C | 1 |
| 7  | 0.710228 | C | 1 |
| 7  | 0.710228 | C | 1 |
| 7  | 0.275228 | C | 1 |
| 7  | 0.579714 | C | 1 |
| 13 | 0.515825 | C | 1 |
| 13 | 0.430893 | C | 1 |
| 1  | 0.087352 | C | 1 |
| 24 | 0.729466 | C | 1 |
| 3  | 0.283487 | C | 1 |
| 20 | 0.500616 | D | 1 |
| 7  | 0.710228 | C | 1 |
| 6  | 0.303852 | C | 1 |
| 6  | 0.303852 | C | 1 |
| 6  | 0.303852 | C | 1 |
| 7  | 0.315676 | I | 0 |
| 11 | 0.31334  | C | 1 |
| 2  | 0.45151  | C | 1 |
| 5  | 0.218209 | I | 0 |
| 24 | 0.729466 | C | 1 |
| 6  | 0.318276 | C | 1 |
| 2  | 0.45151  | C | 1 |
| 7  | 0.315676 | I | 0 |
| 13 | 0.515825 | C | 1 |
| 16 | 0.319677 | C | 1 |
| 5  | 0.218209 | I | 0 |
| 21 | 0.475888 | I | 0 |
| 24 | 0.581694 | D | 1 |
| 16 | 0.319677 | C | 1 |
| 2  | 0.136388 | I | 0 |
| 7  | 0.293008 | C | 1 |

|    |          |   |   |
|----|----------|---|---|
| 7  | 0.710228 | C | 1 |
| 5  | 0.334985 | C | 1 |
| 11 | 0.833217 | E | 1 |
| 13 | 0.515825 | C | 1 |
| 8  | 0.480495 | C | 1 |
| 7  | 0.315676 | I | 0 |
| 10 | 0.252693 | C | 1 |
| 7  | 0.579714 | C | 1 |
| 11 | 0.833217 | E | 1 |
| 3  | 0.283487 | C | 1 |
| 6  | 0.437886 | C | 1 |
| 8  | 0.193606 | C | 1 |
| 5  | 0.411266 | C | 1 |
| 5  | 0.225204 | C | 1 |
| 24 | 0.581694 | D | 1 |
| 24 | 0.581694 | D | 1 |
| 6  | 0.654542 | I | 0 |
| 7  | 0.710228 | C | 1 |
| 7  | 0.579714 | C | 1 |
| 6  | 0.437886 | C | 1 |
| 5  | 0.411266 | C | 1 |
| 1  | 0.285403 | C | 1 |
| 6  | 0.232952 | C | 1 |
| 24 | 0.617673 | C | 1 |
| 3  | 0.283487 | C | 1 |
| 7  | 0.579714 | C | 1 |
| 5  | 0.411266 | C | 1 |
| 10 | 0.282222 | C | 1 |
| 8  | 0.480495 | C | 1 |
| 16 | 0.319677 | C | 1 |
| 7  | 0.275228 | C | 1 |
| 20 | 0.500616 | D | 1 |
| 8  | 0.480495 | C | 1 |
| 7  | 0.275228 | C | 1 |
| 6  | 0.437886 | C | 1 |
| 24 | 0.729466 | C | 1 |
| 7  | 0.315676 | I | 0 |
| 5  | 0.218209 | I | 0 |
| 1  | 0.095098 | C | 1 |
| 10 | 0.222205 | C | 1 |
| 5  | 0.552434 | D | 1 |
| 2  | 0.45151  | C | 1 |
| 5  | 0.506672 | I | 0 |
| 5  | 0.270498 | C | 1 |
| 16 | 0.319677 | C | 1 |
| 20 | 0.500616 | D | 1 |
| 16 | 0.319677 | C | 1 |
| 7  | 0.710228 | C | 1 |
| 5  | 0.411266 | C | 1 |
| 10 | 0.180306 | C | 1 |
| 16 | 0.319677 | C | 1 |
| 12 | 0.64045  | C | 1 |
| 3  | 0.283487 | C | 1 |
| 5  | 0.411266 | C | 1 |

|    |          |   |   |
|----|----------|---|---|
| 5  | 0.482796 | B | 1 |
| 2  | 0.264621 | C | 1 |
| 16 | 0.319677 | C | 1 |
| 6  | 0.232952 | C | 1 |
| 5  | 0.506672 | I | 0 |
| 21 | 0.235875 | C | 1 |
| 7  | 0.275228 | C | 1 |
| 10 | 0.222205 | C | 1 |
| 21 | 0.475888 | I | 0 |
| 10 | 0.252693 | C | 1 |
| 10 | 0.222205 | C | 1 |
| 1  | 0.285403 | C | 1 |
| 24 | 0.581694 | D | 1 |
| 7  | 0.293008 | C | 1 |
| 20 | 0.500616 | D | 1 |
| 5  | 0.411266 | C | 1 |
| 7  | 0.579714 | C | 1 |
| 1  | 0.087352 | C | 1 |
| 24 | 0.729466 | C | 1 |
| 3  | 0.283487 | C | 1 |
| 3  | 0.283487 | C | 1 |
| 20 | 0.500616 | D | 1 |
| 3  | 0.283487 | C | 1 |
| 21 | 0.235875 | C | 1 |
| 6  | 0.318276 | C | 1 |
| 2  | 0.297867 | C | 1 |
| 7  | 0.293008 | C | 1 |
| 21 | 0.475888 | I | 0 |
| 6  | 0.654542 | I | 0 |
| 13 | 0.321237 | L | 0 |
| 6  | 0.303852 | C | 1 |
| 11 | 0.833217 | E | 1 |
| 12 | 0.64045  | C | 1 |
| 6  | 0.232952 | C | 1 |
| 13 | 0.515825 | C | 1 |
| 13 | 0.321237 | L | 0 |
| 7  | 0.710228 | C | 1 |
| 7  | 0.315676 | I | 0 |
| 20 | 0.500616 | D | 1 |
| 8  | 0.480495 | C | 1 |
| 2  | 0.279042 | M | 0 |
| 1  | 0.159203 | C | 1 |
| 21 | 0.235875 | C | 1 |
| 13 | 0.430893 | C | 1 |
| 8  | 0.480495 | C | 1 |
| 10 | 0.282222 | C | 1 |
| 10 | 0.252693 | C | 1 |
| 5  | 0.506672 | I | 0 |
| 13 | 0.430893 | C | 1 |
| 20 | 0.500616 | D | 1 |
| 21 | 0.475888 | I | 0 |
| 24 | 0.419242 | H | 0 |
| 13 | 0.430893 | C | 1 |
| 6  | 0.232952 | C | 1 |

|    |          |   |   |
|----|----------|---|---|
| 5  | 0.482796 | B | 1 |
| 5  | 0.479203 | E | 1 |
| 5  | 0.482796 | B | 1 |
| 8  | 0.480495 | C | 1 |
| 7  | 0.579714 | C | 1 |
| 5  | 0.482796 | B | 1 |
| 24 | 0.729466 | C | 1 |
| 5  | 0.482796 | B | 1 |
| 5  | 0.482796 | B | 1 |
| 8  | 0.480495 | C | 1 |
| 20 | 0.500616 | D | 1 |
| 1  | 0.425134 | C | 1 |
| 6  | 0.232952 | C | 1 |
| 20 | 0.500616 | D | 1 |
| 13 | 0.430893 | C | 1 |
| 8  | 0.193606 | C | 1 |
| 2  | 0.279042 | M | 0 |
| 5  | 0.334985 | C | 1 |
| 1  | 0.095098 | C | 1 |
| 5  | 0.225204 | C | 1 |
| 11 | 0.833217 | E | 1 |
| 13 | 0.321237 | L | 0 |
| 10 | 0.180306 | C | 1 |
| 20 | 0.500616 | D | 1 |
| 1  | 0.3277   | C | 1 |
| 6  | 0.232952 | C | 1 |
| 21 | 0.475888 | I | 0 |
| 13 | 0.515825 | C | 1 |
| 24 | 0.729466 | C | 1 |
| 11 | 0.833217 | E | 1 |
| 13 | 0.321237 | L | 0 |
| 6  | 0.654542 | I | 0 |
| 24 | 0.581694 | D | 1 |
| 20 | 0.500616 | D | 1 |
| 13 | 0.430893 | C | 1 |
| 20 | 0.500616 | D | 1 |
| 5  | 0.552434 | D | 1 |
| 5  | 0.411266 | C | 1 |
| 2  | 0.109461 | C | 1 |
| 6  | 0.232952 | C | 1 |
| 7  | 0.275228 | C | 1 |
| 5  | 0.552434 | D | 1 |
| 3  | 0.283487 | C | 1 |
| 2  | 0.297867 | C | 1 |
| 5  | 0.506672 | I | 0 |
| 21 | 0.235875 | C | 1 |
| 1  | 0.3277   | C | 1 |
| 3  | 0.283487 | C | 1 |
| 1  | 0.3277   | C | 1 |
| 21 | 0.475888 | I | 0 |
| 7  | 0.293008 | C | 1 |
| 20 | 0.500616 | D | 1 |
| 20 | 0.500616 | D | 1 |
| 10 | 0.252693 | C | 1 |

|    |          |   |   |
|----|----------|---|---|
| 21 | 0.475888 | I | 0 |
| 21 | 0.235875 | C | 1 |
| 1  | 0.425134 | C | 1 |
| 1  | 0.425134 | C | 1 |
| 6  | 0.437886 | C | 1 |
| 20 | 0.500616 | D | 1 |
| 14 | 0.715269 | G | 0 |
| 5  | 0.270498 | C | 1 |
| 12 | 0.64045  | C | 1 |
| 1  | 0.397388 | C | 1 |
| 10 | 0.282222 | C | 1 |
| 20 | 0.500616 | D | 1 |
| 5  | 0.411266 | C | 1 |
| 7  | 0.275228 | C | 1 |
| 1  | 0.095098 | C | 1 |
| 3  | 0.283487 | C | 1 |
| 16 | 0.319677 | C | 1 |
| 6  | 0.303852 | C | 1 |
| 8  | 0.480495 | C | 1 |
| 7  | 0.710228 | C | 1 |
| 8  | 0.480495 | C | 1 |
| 2  | 0.297867 | C | 1 |
| 6  | 0.654542 | I | 0 |
| 5  | 0.482796 | B | 1 |
| 7  | 0.710228 | C | 1 |
| 5  | 0.218209 | I | 0 |
| 5  | 0.218209 | I | 0 |
| 12 | 0.64045  | C | 1 |
| 1  | 0.087352 | C | 1 |
| 1  | 0.087352 | C | 1 |
| 6  | 0.232952 | C | 1 |
| 6  | 0.437886 | C | 1 |
| 19 | 0.427832 | G | 0 |
| 3  | 0.283487 | C | 1 |
| 10 | 0.180306 | C | 1 |
| 13 | 0.430893 | C | 1 |
| 5  | 0.411266 | C | 1 |
| 3  | 0.276133 | C | 1 |
| 6  | 0.318276 | C | 1 |
| 16 | 0.319677 | C | 1 |
| 10 | 0.252693 | C | 1 |
| 24 | 0.617673 | C | 1 |
| 5  | 0.411266 | C | 1 |
| 8  | 0.480495 | C | 1 |
| 20 | 0.500616 | D | 1 |
| 11 | 0.31334  | C | 1 |
| 13 | 0.515825 | C | 1 |
| 8  | 0.480495 | C | 1 |
| 16 | 0.319677 | C | 1 |
| 24 | 0.617673 | C | 1 |
| 5  | 0.411266 | C | 1 |
| 5  | 0.482796 | B | 1 |
| 16 | 0.319677 | C | 1 |
| 5  | 0.552434 | D | 1 |



|    |          |   |   |
|----|----------|---|---|
| 16 | 0.319677 | C | 1 |
| 21 | 0.235875 | C | 1 |
| 5  | 0.411266 | C | 1 |
| 5  | 0.506672 | I | 0 |
| 13 | 0.430893 | C | 1 |
| 7  | 0.275228 | C | 1 |
| 2  | 0.297867 | C | 1 |
| 5  | 0.479203 | E | 1 |
| 3  | 0.276133 | C | 1 |
| 7  | 0.579714 | C | 1 |
| 6  | 0.318276 | C | 1 |
| 10 | 0.282222 | C | 1 |
| 8  | 0.193606 | C | 1 |
| 8  | 0.448001 | C | 1 |
| 5  | 0.506672 | I | 0 |
| 10 | 0.282222 | C | 1 |
| 1  | 0.159203 | C | 1 |
| 21 | 0.475888 | I | 0 |
| 5  | 0.411266 | C | 1 |
| 6  | 0.232952 | C | 1 |
| 7  | 0.275228 | C | 1 |
| 1  | 0.285403 | C | 1 |
| 21 | 0.235875 | C | 1 |
| 21 | 0.235875 | C | 1 |
| 5  | 0.225204 | C | 1 |
| 20 | 0.500616 | D | 1 |
| 1  | 0.3277   | C | 1 |
| 13 | 0.430893 | C | 1 |
| 5  | 0.334985 | C | 1 |
| 20 | 0.500616 | D | 1 |
| 24 | 0.617673 | C | 1 |
| 5  | 0.225204 | C | 1 |
| 24 | 0.581694 | D | 1 |
| 21 | 0.475888 | I | 0 |
| 1  | 0.095098 | C | 1 |
| 8  | 0.448001 | C | 1 |
| 3  | 0.283487 | C | 1 |
| 7  | 0.710228 | C | 1 |
| 24 | 0.581694 | D | 1 |
| 9  | 0.617293 | C | 1 |
| 7  | 0.275228 | C | 1 |
| 2  | 0.279042 | M | 0 |
| 5  | 0.479203 | E | 1 |
| 6  | 0.232952 | C | 1 |
| 3  | 0.276133 | C | 1 |
| 5  | 0.270498 | C | 1 |
| 7  | 0.275228 | C | 1 |
| 13 | 0.515825 | C | 1 |
| 8  | 0.480495 | C | 1 |
| 21 | 0.235875 | C | 1 |
| 5  | 0.411266 | C | 1 |
| 20 | 0.500616 | D | 1 |
| 24 | 0.617673 | C | 1 |
| 5  | 0.225204 | C | 1 |

|    |          |   |   |
|----|----------|---|---|
| 8  | 0.448001 | C | 1 |
| 6  | 0.437886 | C | 1 |
| 7  | 0.579714 | C | 1 |
| 13 | 0.515825 | C | 1 |
| 8  | 0.480495 | C | 1 |
| 8  | 0.480495 | C | 1 |
| 6  | 0.225057 | C | 1 |
| 2  | 0.109461 | C | 1 |
| 10 | 0.252693 | C | 1 |
| 5  | 0.411266 | C | 1 |
| 7  | 0.275228 | C | 1 |
| 5  | 0.411266 | C | 1 |
| 5  | 0.552434 | D | 1 |
| 9  | 0.617293 | C | 1 |
| 24 | 0.581694 | D | 1 |
| 6  | 0.303852 | C | 1 |
| 24 | 0.581694 | D | 1 |
| 5  | 0.506672 | I | 0 |
| 5  | 0.411266 | C | 1 |
| 24 | 0.581694 | D | 1 |
| 16 | 0.319677 | C | 1 |
| 2  | 0.181212 | C | 1 |
| 13 | 0.430893 | C | 1 |
| 8  | 0.480495 | C | 1 |
| 5  | 0.411266 | C | 1 |
| 12 | 0.64045  | C | 1 |
| 13 | 0.430893 | C | 1 |
| 24 | 0.617673 | C | 1 |
| 20 | 0.500616 | D | 1 |
| 1  | 0.087352 | C | 1 |
| 1  | 0.397388 | C | 1 |
| 6  | 0.225057 | C | 1 |
| 16 | 0.319677 | C | 1 |
| 1  | 0.285403 | C | 1 |
| 5  | 0.218209 | I | 0 |
| 5  | 0.552434 | D | 1 |
| 5  | 0.552434 | D | 1 |
| 7  | 0.275228 | C | 1 |
| 13 | 0.515825 | C | 1 |
| 5  | 0.411266 | C | 1 |
| 10 | 0.252693 | C | 1 |
| 13 | 0.430893 | C | 1 |
| 20 | 0.500616 | D | 1 |
| 20 | 0.500616 | D | 1 |
| 24 | 0.419242 | H | 0 |
| 5  | 0.411266 | C | 1 |
| 13 | 0.430893 | C | 1 |
| 10 | 0.222205 | C | 1 |
| 8  | 0.480495 | C | 1 |
| 7  | 0.710228 | C | 1 |
| 2  | 0.109461 | C | 1 |
| 20 | 0.500616 | D | 1 |
| 5  | 0.482796 | B | 1 |
| 7  | 0.315676 | I | 0 |

|    |          |   |   |
|----|----------|---|---|
| 6  | 0.654542 | I | 0 |
| 14 | 0.715269 | G | 0 |
| 8  | 0.193606 | C | 1 |
| 7  | 0.469524 | L | 0 |
| 10 | 0.252693 | C | 1 |
| 1  | 0.397388 | C | 1 |
| 24 | 0.729466 | C | 1 |
| 8  | 0.480495 | C | 1 |
| 7  | 0.315676 | I | 0 |
| 24 | 0.581694 | D | 1 |
| 21 | 0.235875 | C | 1 |
| 2  | 0.297867 | C | 1 |
| 7  | 0.579714 | C | 1 |
| 6  | 0.318276 | C | 1 |
| 13 | 0.430893 | C | 1 |
| 11 | 0.31334  | C | 1 |
| 2  | 0.181212 | C | 1 |
| 13 | 0.515825 | C | 1 |
| 8  | 0.480495 | C | 1 |
| 5  | 0.411266 | C | 1 |
| 24 | 0.581694 | D | 1 |
| 2  | 0.109461 | C | 1 |
| 24 | 0.729466 | C | 1 |
| 5  | 0.411266 | C | 1 |
| 13 | 0.515825 | C | 1 |
| 6  | 0.232952 | C | 1 |
| 14 | 0.715269 | G | 0 |
| 5  | 0.411266 | C | 1 |
| 7  | 0.315676 | I | 0 |
| 5  | 0.552434 | D | 1 |
| 16 | 0.319677 | C | 1 |
| 13 | 0.515825 | C | 1 |
| 16 | 0.319677 | C | 1 |
| 2  | 0.136388 | I | 0 |
| 7  | 0.315676 | I | 0 |
| 11 | 0.31334  | C | 1 |
| 2  | 0.264621 | C | 1 |
| 20 | 0.500616 | D | 1 |
| 11 | 0.31334  | C | 1 |
| 6  | 0.654542 | I | 0 |
| 19 | 0.427832 | G | 0 |
| 6  | 0.437886 | C | 1 |
| 6  | 0.437886 | C | 1 |
| 13 | 0.515825 | C | 1 |
| 21 | 0.235875 | C | 1 |
| 8  | 0.480495 | C | 1 |
| 7  | 0.469524 | L | 0 |
| 5  | 0.218209 | I | 0 |
| 20 | 0.500616 | D | 1 |
| 2  | 0.297867 | C | 1 |
| 2  | 0.181212 | C | 1 |
| 10 | 0.222205 | C | 1 |
| 10 | 0.222205 | C | 1 |
| 5  | 0.506672 | I | 0 |

|    |          |   |   |
|----|----------|---|---|
| 21 | 0.475888 | I | 0 |
| 8  | 0.193606 | C | 1 |
| 16 | 0.319677 | C | 1 |
| 8  | 0.480495 | C | 1 |
| 21 | 0.475888 | I | 0 |
| 6  | 0.225057 | C | 1 |
| 13 | 0.430893 | C | 1 |
| 6  | 0.232952 | C | 1 |
| 6  | 0.654542 | I | 0 |
| 19 | 0.427832 | G | 0 |
| 5  | 0.482796 | B | 1 |
| 7  | 0.315676 | I | 0 |
| 2  | 0.264621 | C | 1 |
| 6  | 0.318276 | C | 1 |
| 5  | 0.270498 | C | 1 |
| 7  | 0.275228 | C | 1 |
| 7  | 0.275228 | C | 1 |
| 5  | 0.479203 | E | 1 |
| 11 | 0.31334  | C | 1 |
| 8  | 0.448001 | C | 1 |
| 24 | 0.581694 | D | 1 |
| 1  | 0.159203 | C | 1 |
| 2  | 0.297867 | C | 1 |
| 13 | 0.321237 | L | 0 |
| 5  | 0.552434 | D | 1 |
| 8  | 0.480495 | C | 1 |
| 1  | 0.095098 | C | 1 |
| 2  | 0.264621 | C | 1 |
| 6  | 0.232952 | C | 1 |
| 1  | 0.397388 | C | 1 |
| 13 | 0.430893 | C | 1 |
| 8  | 0.480495 | C | 1 |
| 8  | 0.480495 | C | 1 |
| 5  | 0.411266 | C | 1 |
| 8  | 0.448001 | C | 1 |
| 5  | 0.411266 | C | 1 |
| 1  | 0.095098 | C | 1 |
| 11 | 0.31334  | C | 1 |
| 3  | 0.283487 | C | 1 |
| 21 | 0.235875 | C | 1 |
| 24 | 0.617673 | C | 1 |
| 5  | 0.411266 | C | 1 |
| 5  | 0.411266 | C | 1 |
| 2  | 0.279042 | M | 0 |
| 1  | 0.425134 | C | 1 |
| 1  | 0.397388 | C | 1 |
| 5  | 0.479203 | E | 1 |
| 5  | 0.218209 | I | 0 |
| 5  | 0.479203 | E | 1 |
| 9  | 0.617293 | C | 1 |
| 2  | 0.136388 | I | 0 |
| 2  | 0.136388 | I | 0 |
| 7  | 0.275228 | C | 1 |
| 6  | 0.232952 | C | 1 |

|    |          |   |   |
|----|----------|---|---|
| 13 | 0.430893 | C | 1 |
| 7  | 0.579714 | C | 1 |
| 20 | 0.500616 | D | 1 |
| 5  | 0.552434 | D | 1 |
| 5  | 0.411266 | C | 1 |
| 6  | 0.654542 | I | 0 |
| 19 | 0.427832 | G | 0 |
| 5  | 0.218209 | I | 0 |
| 6  | 0.232952 | C | 1 |
| 8  | 0.448001 | C | 1 |
| 13 | 0.321237 | L | 0 |
| 7  | 0.579714 | C | 1 |
| 1  | 0.3277   | C | 1 |
| 5  | 0.482796 | B | 1 |
| 5  | 0.411266 | C | 1 |
| 7  | 0.275228 | C | 1 |
| 5  | 0.411266 | C | 1 |
| 16 | 0.319677 | C | 1 |
| 13 | 0.321237 | L | 0 |
| 13 | 0.321237 | L | 0 |
| 11 | 0.833217 | E | 1 |
| 7  | 0.275228 | C | 1 |
| 5  | 0.334985 | C | 1 |
| 2  | 0.181212 | C | 1 |
| 6  | 0.318276 | C | 1 |
| 21 | 0.235875 | C | 1 |
| 16 | 0.319677 | C | 1 |
| 13 | 0.515825 | C | 1 |
| 5  | 0.225204 | C | 1 |
| 2  | 0.297867 | C | 1 |
| 1  | 0.285403 | C | 1 |
| 10 | 0.252693 | C | 1 |
| 1  | 0.397388 | C | 1 |
| 7  | 0.275228 | C | 1 |
| 2  | 0.264621 | C | 1 |
| 16 | 0.319677 | C | 1 |
| 10 | 0.180306 | C | 1 |
| 5  | 0.334985 | C | 1 |
| 5  | 0.411266 | C | 1 |
| 1  | 0.285403 | C | 1 |
| 13 | 0.515825 | C | 1 |
| 7  | 0.710228 | C | 1 |
| 2  | 0.181212 | C | 1 |
| 6  | 0.225057 | C | 1 |
| 5  | 0.225204 | C | 1 |
| 7  | 0.275228 | C | 1 |
| 7  | 0.579714 | C | 1 |
| 5  | 0.506672 | I | 0 |
| 12 | 0.64045  | C | 1 |
| 5  | 0.411266 | C | 1 |
| 1  | 0.095098 | C | 1 |
| 10 | 0.180306 | C | 1 |
| 20 | 0.500616 | D | 1 |
| 14 | 0.715269 | G | 0 |



|    |          |   |   |
|----|----------|---|---|
| 7  | 0.532355 | C | 1 |
| 7  | 0.532355 | C | 1 |
| 7  | 0.532355 | C | 1 |
| 7  | 0.532355 | C | 1 |
| 21 | 0.068284 | C | 1 |
| 21 | 0.068284 | C | 1 |
| 21 | 0.068284 | C | 1 |
| 21 | 0.068284 | C | 1 |
| 21 | 0.068284 | C | 1 |
| 21 | 0.068284 | C | 1 |
| 21 | 0.068284 | C | 1 |
| 21 | 0.068284 | C | 1 |
| 21 | 0.068284 | C | 1 |
| 21 | 0.068284 | C | 1 |
| 21 | 0.068284 | C | 1 |
| 21 | 0.068284 | C | 1 |
| 7  | 0.615398 | C | 1 |
| 7  | 0.615398 | C | 1 |
| 7  | 0.615398 | C | 1 |
| 7  | 0.615398 | C | 1 |
| 7  | 0.615398 | C | 1 |
| 7  | 0.615398 | C | 1 |
| 7  | 0.615398 | C | 1 |
| 7  | 0.615398 | C | 1 |
| 7  | 0.615398 | C | 1 |
| 7  | 0.615398 | C | 1 |
| 7  | 0.615398 | C | 1 |
| 7  | 0.615398 | C | 1 |
| 7  | 0.615398 | C | 1 |
| 7  | 0.615398 | C | 1 |
| 7  | 0.615398 | C | 1 |
| 7  | 0.615398 | C | 1 |
| 7  | 0.615398 | C | 1 |
| 7  | 0.615398 | C | 1 |
| 7  | 0.615398 | C | 1 |
| 24 | 0.416092 | C | 1 |
| 7  | 0.217453 | C | 1 |
| 24 | 0.416092 | C | 1 |
| 7  | 0.217453 | C | 1 |
| 24 | 0.416092 | C | 1 |
| 16 | 0.391103 | C | 1 |
| 24 | 0.416092 | C | 1 |
| 16 | 0.391103 | C | 1 |
| 16 | 0.391103 | C | 1 |
| 16 | 0.391103 | C | 1 |
| 24 | 0.416092 | C | 1 |
| 24 | 0.416092 | C | 1 |
| 7  | 0.217453 | C | 1 |
| 24 | 0.416092 | C | 1 |
| 24 | 0.416092 | C | 1 |
| 16 | 0.391103 | C | 1 |
| 16 | 0.391103 | C | 1 |
| 16 | 0.391103 | C | 1 |
| 24 | 0.416092 | C | 1 |
| 7  | 0.26806  | C | 1 |
| 7  | 0.26806  | C | 1 |
| 7  | 0.26806  | C | 1 |
| 10 | 0.326739 | B | 1 |
| 10 | 0.326739 | B | 1 |
| 10 | 0.326739 | B | 1 |
| 10 | 0.326739 | B | 1 |





|    |          |   |   |
|----|----------|---|---|
| 5  | 0.646626 | C | 1 |
| 13 | 0.662227 | C | 1 |
| 13 | 0.662227 | C | 1 |
| 5  | 0.646626 | C | 1 |
| 8  | 0.571455 | C | 1 |
| 5  | 0.646626 | C | 1 |
| 13 | 0.662227 | C | 1 |
| 8  | 0.571455 | C | 1 |
| 13 | 0.662227 | C | 1 |
| 13 | 0.662227 | C | 1 |
| 1  | 0.236068 | C | 1 |
| 13 | 0.662227 | C | 1 |
| 13 | 0.662227 | C | 1 |
| 13 | 0.662227 | C | 1 |
| 13 | 0.662227 | C | 1 |
| 5  | 0.646626 | C | 1 |
| 13 | 0.662227 | C | 1 |
| 5  | 0.646626 | C | 1 |
| 13 | 0.662227 | C | 1 |
| 13 | 0.662227 | C | 1 |
| 8  | 0.571455 | C | 1 |
| 6  | 0.409047 | C | 1 |
| 13 | 0.662227 | C | 1 |
| 1  | 0.236068 | C | 1 |
| 13 | 0.662227 | C | 1 |
| 5  | 0.646626 | C | 1 |
| 13 | 0.662227 | C | 1 |
| 13 | 0.662227 | C | 1 |
| 13 | 0.662227 | C | 1 |
| 13 | 0.662227 | C | 1 |
| 1  | 0.384593 | C | 1 |
| 1  | 0.384593 | C | 1 |
| 13 | 0.662227 | C | 1 |
| 13 | 0.662227 | C | 1 |
| 13 | 0.662227 | C | 1 |
| 13 | 0.662227 | C | 1 |
| 8  | 0.571455 | C | 1 |
| 13 | 0.662227 | C | 1 |
| 6  | 0.409047 | C | 1 |
| 6  | 0.409047 | C | 1 |
| 13 | 0.662227 | C | 1 |
| 13 | 0.662227 | C | 1 |
| 13 | 0.662227 | C | 1 |
| 13 | 0.662227 | C | 1 |
| 8  | 0.571455 | C | 1 |
| 13 | 0.662227 | C | 1 |
| 13 | 0.662227 | C | 1 |
| 7  | 0.571874 | C | 1 |
| 10 | 0.550726 | C | 1 |
| 3  | 0.642095 | C | 1 |
| 2  | 0.166887 | C | 1 |
| 1  | 0.101367 | I | 0 |
| 2  | 0.399215 | C | 1 |

|    |          |   |   |
|----|----------|---|---|
| 7  | 0.068284 | C | 1 |
| 2  | 0.18377  | C | 1 |
| 22 | 0.711508 | C | 1 |
| 14 | 0.378494 | C | 1 |
| 6  | 0.660054 | C | 1 |
| 10 | 0.550726 | C | 1 |
| 7  | 0.254125 | C | 1 |
| 19 | 0.367401 | C | 1 |
| 2  | 0.387461 | C | 1 |
| 24 | 0.210867 | D | 1 |
| 15 | 0.290933 | C | 1 |
| 13 | 0.463569 | C | 1 |
| 2  | 0.387461 | C | 1 |
| 13 | 0.364858 | C | 1 |
| 13 | 0.463569 | C | 1 |
| 2  | 0.399215 | C | 1 |
| 22 | 0.711508 | C | 1 |
| 21 | 0.456978 | D | 1 |
| 13 | 0.463569 | C | 1 |
| 2  | 0.160319 | I | 0 |
| 7  | 0.571874 | C | 1 |
| 9  | 0.112842 | I | 0 |
| 21 | 0.433365 | C | 1 |
| 16 | 0.643117 | C | 1 |
| 13 | 0.463569 | C | 1 |
| 1  | 0.315809 | C | 1 |
| 2  | 0.270744 | C | 1 |
| 13 | 0.463569 | C | 1 |
| 14 | 0.378494 | C | 1 |
| 1  | 0.086102 | C | 1 |
| 7  | 0.571874 | C | 1 |
| 2  | 0.399215 | C | 1 |
| 7  | 0.571874 | C | 1 |
| 13 | 0.463569 | C | 1 |
| 13 | 0.463569 | C | 1 |
| 6  | 0.61637  | I | 0 |
| 1  | 0.352404 | R | 0 |
| 22 | 0.711508 | C | 1 |
| 15 | 0.290933 | C | 1 |
| 13 | 0.463569 | C | 1 |
| 22 | 0.711508 | C | 1 |
| 2  | 0.387461 | C | 1 |
| 9  | 0.237379 | I | 0 |
| 1  | 0.352404 | R | 0 |
| 6  | 0.660054 | C | 1 |
| 7  | 0.561303 | C | 1 |
| 14 | 0.378494 | C | 1 |
| 22 | 0.711508 | C | 1 |
| 6  | 0.660054 | C | 1 |
| 16 | 0.800021 | K | 1 |
| 2  | 0.399215 | C | 1 |
| 21 | 0.433365 | C | 1 |
| 8  | 0.23454  | C | 1 |
| 8  | 0.23454  | C | 1 |

|    |          |   |   |
|----|----------|---|---|
| 2  | 0.160319 | I | 0 |
| 1  | 0.22437  | C | 1 |
| 16 | 0.643117 | C | 1 |
| 3  | 0.199655 | I | 0 |
| 22 | 0.711508 | C | 1 |
| 8  | 0.23454  | C | 1 |
| 2  | 0.166887 | C | 1 |
| 5  | 0.196859 | C | 1 |
| 16 | 0.643117 | C | 1 |
| 7  | 0.571874 | C | 1 |
| 22 | 0.711508 | C | 1 |
| 9  | 0.237379 | I | 0 |
| 22 | 0.711508 | C | 1 |
| 6  | 0.61637  | I | 0 |
| 2  | 0.288189 | I | 0 |
| 2  | 0.18071  | C | 1 |
| 2  | 0.22736  | C | 1 |
| 2  | 0.18377  | C | 1 |
| 8  | 0.441759 | C | 1 |
| 13 | 0.463569 | C | 1 |
| 10 | 0.550726 | C | 1 |
| 9  | 0.237379 | I | 0 |
| 16 | 0.247747 | C | 1 |
| 1  | 0.22437  | C | 1 |
| 16 | 0.800021 | K | 1 |
| 2  | 0.160319 | I | 0 |
| 7  | 0.571874 | C | 1 |
| 7  | 0.571874 | C | 1 |
| 16 | 0.800021 | K | 1 |
| 8  | 0.441759 | C | 1 |
| 7  | 0.571874 | C | 1 |
| 3  | 0.199655 | I | 0 |
| 21 | 0.456978 | D | 1 |
| 2  | 0.399215 | C | 1 |
| 6  | 0.660054 | C | 1 |
| 3  | 0.642095 | C | 1 |
| 15 | 0.290933 | C | 1 |
| 1  | 0.086102 | C | 1 |
| 16 | 0.800021 | K | 1 |
| 2  | 0.55466  | I | 0 |
| 7  | 0.561303 | C | 1 |
| 21 | 0.456978 | D | 1 |
| 7  | 0.571874 | C | 1 |
| 2  | 0.270744 | C | 1 |
| 22 | 0.711508 | C | 1 |
| 13 | 0.463569 | C | 1 |
| 2  | 0.387461 | C | 1 |
| 13 | 0.463569 | C | 1 |
| 6  | 0.660054 | C | 1 |
| 9  | 0.112842 | I | 0 |
| 9  | 0.237379 | I | 0 |
| 13 | 0.364858 | C | 1 |
| 22 | 0.531551 | C | 1 |
| 7  | 0.571874 | C | 1 |

|    |          |   |   |
|----|----------|---|---|
| 22 | 0.711508 | C | 1 |
| 2  | 0.18071  | C | 1 |
| 2  | 0.22736  | C | 1 |
| 16 | 0.247747 | C | 1 |
| 14 | 0.378494 | C | 1 |
| 6  | 0.61637  | I | 0 |
| 3  | 0.642095 | C | 1 |
| 7  | 0.561303 | C | 1 |
| 6  | 0.61637  | I | 0 |
| 2  | 0.160319 | I | 0 |
| 6  | 0.660054 | C | 1 |
| 2  | 0.399215 | C | 1 |
| 6  | 0.61637  | I | 0 |
| 8  | 0.441759 | C | 1 |
| 13 | 0.364858 | C | 1 |
| 16 | 0.800021 | K | 1 |
| 7  | 0.254125 | C | 1 |
| 13 | 0.364858 | C | 1 |
| 14 | 0.378494 | C | 1 |
| 22 | 0.711508 | C | 1 |
| 1  | 0.101367 | I | 0 |
| 6  | 0.61637  | I | 0 |
| 24 | 0.210867 | D | 1 |
| 19 | 0.367401 | C | 1 |
| 2  | 0.18071  | C | 1 |
| 7  | 0.561303 | C | 1 |
| 2  | 0.18071  | C | 1 |
| 2  | 0.387461 | C | 1 |
| 13 | 0.463569 | C | 1 |
| 13 | 0.364858 | C | 1 |
| 14 | 0.378494 | C | 1 |
| 7  | 0.561303 | C | 1 |
| 14 | 0.378494 | C | 1 |
| 16 | 0.800021 | K | 1 |
| 7  | 0.561303 | C | 1 |
| 2  | 0.387461 | C | 1 |
| 2  | 0.288189 | I | 0 |
| 13 | 0.463569 | C | 1 |
| 9  | 0.112842 | I | 0 |
| 2  | 0.399215 | C | 1 |
| 2  | 0.387461 | C | 1 |
| 7  | 0.571874 | C | 1 |
| 6  | 0.660054 | C | 1 |
| 13 | 0.364858 | C | 1 |
| 2  | 0.288189 | I | 0 |
| 22 | 0.711508 | C | 1 |
| 2  | 0.270744 | C | 1 |
| 8  | 0.23454  | C | 1 |
| 6  | 0.660054 | C | 1 |
| 6  | 0.660054 | C | 1 |
| 6  | 0.660054 | C | 1 |
| 6  | 0.660054 | C | 1 |
| 22 | 0.711508 | C | 1 |
| 2  | 0.160319 | I | 0 |

|    |          |   |   |
|----|----------|---|---|
| 7  | 0.571874 | C | 1 |
| 3  | 0.642095 | C | 1 |
| 6  | 0.61637  | I | 0 |
| 1  | 0.315809 | C | 1 |
| 6  | 0.660054 | C | 1 |
| 1  | 0.315809 | C | 1 |
| 13 | 0.364858 | C | 1 |
| 8  | 0.23454  | C | 1 |
| 13 | 0.463569 | C | 1 |
| 14 | 0.378494 | C | 1 |
| 10 | 0.550726 | C | 1 |
| 22 | 0.711508 | C | 1 |
| 3  | 0.199655 | I | 0 |
| 7  | 0.571874 | C | 1 |
| 22 | 0.711508 | C | 1 |
| 1  | 0.315809 | C | 1 |
| 13 | 0.463569 | C | 1 |
| 16 | 0.800021 | K | 1 |
| 6  | 0.660054 | C | 1 |
| 16 | 0.643117 | C | 1 |
| 7  | 0.254125 | C | 1 |
| 7  | 0.571874 | C | 1 |
| 8  | 0.23454  | C | 1 |
| 9  | 0.237379 | I | 0 |
| 16 | 0.247747 | C | 1 |
| 6  | 0.61637  | I | 0 |
| 2  | 0.166887 | C | 1 |
| 5  | 0.196859 | C | 1 |
| 2  | 0.166887 | C | 1 |
| 7  | 0.254125 | C | 1 |
| 5  | 0.196859 | C | 1 |
| 19 | 0.367401 | C | 1 |
| 9  | 0.112842 | I | 0 |
| 1  | 0.352404 | R | 0 |
| 3  | 0.199655 | I | 0 |
| 10 | 0.550726 | C | 1 |
| 16 | 0.643117 | C | 1 |
| 2  | 0.18377  | C | 1 |
| 2  | 0.18377  | C | 1 |
| 9  | 0.112842 | I | 0 |
| 1  | 0.352404 | R | 0 |
| 9  | 0.237379 | I | 0 |
| 7  | 0.571874 | C | 1 |
| 9  | 0.112842 | I | 0 |
| 9  | 0.237379 | I | 0 |
| 1  | 0.086102 | C | 1 |
| 1  | 0.352404 | R | 0 |
| 2  | 0.288189 | I | 0 |
| 2  | 0.270744 | C | 1 |
| 2  | 0.55466  | I | 0 |
| 15 | 0.290933 | C | 1 |
| 24 | 0.210867 | D | 1 |
| 1  | 0.086102 | C | 1 |
| 16 | 0.800021 | K | 1 |

|    |          |   |   |
|----|----------|---|---|
| 7  | 0.561303 | C | 1 |
| 13 | 0.463569 | C | 1 |
| 2  | 0.18071  | C | 1 |
| 5  | 0.196859 | C | 1 |
| 2  | 0.270744 | C | 1 |
| 22 | 0.711508 | C | 1 |
| 22 | 0.711508 | C | 1 |
| 7  | 0.254125 | C | 1 |
| 2  | 0.270744 | C | 1 |
| 13 | 0.463569 | C | 1 |
| 2  | 0.270744 | C | 1 |
| 21 | 0.456978 | D | 1 |
| 1  | 0.352404 | R | 0 |
| 2  | 0.166887 | C | 1 |
| 6  | 0.61637  | I | 0 |
| 2  | 0.399215 | C | 1 |
| 2  | 0.288189 | I | 0 |
| 21 | 0.456978 | D | 1 |
| 2  | 0.399215 | C | 1 |
| 6  | 0.61637  | I | 0 |
| 2  | 0.18377  | C | 1 |
| 2  | 0.18377  | C | 1 |
| 1  | 0.22437  | C | 1 |
| 2  | 0.387461 | C | 1 |
| 2  | 0.387461 | C | 1 |
| 2  | 0.387461 | C | 1 |
| 6  | 0.660054 | C | 1 |
| 6  | 0.660054 | C | 1 |
| 7  | 0.561303 | C | 1 |
| 7  | 0.571874 | C | 1 |
| 7  | 0.561303 | C | 1 |
| 6  | 0.61637  | I | 0 |
| 22 | 0.531551 | C | 1 |
| 13 | 0.463569 | C | 1 |
| 10 | 0.550726 | C | 1 |
| 14 | 0.378494 | C | 1 |
| 9  | 0.112842 | I | 0 |
| 2  | 0.399215 | C | 1 |
| 2  | 0.18377  | C | 1 |
| 2  | 0.55466  | I | 0 |
| 10 | 0.550726 | C | 1 |
| 6  | 0.660054 | C | 1 |
| 13 | 0.364858 | C | 1 |
| 9  | 0.237379 | I | 0 |
| 8  | 0.441759 | C | 1 |
| 22 | 0.531551 | C | 1 |
| 3  | 0.199655 | I | 0 |
| 3  | 0.642095 | C | 1 |
| 2  | 0.22736  | C | 1 |
| 3  | 0.642095 | C | 1 |
| 7  | 0.254125 | C | 1 |
| 13 | 0.364858 | C | 1 |
| 14 | 0.378494 | C | 1 |
| 2  | 0.22736  | C | 1 |

|    |          |   |   |
|----|----------|---|---|
| 2  | 0.22736  | C | 1 |
| 7  | 0.571874 | C | 1 |
| 13 | 0.463569 | C | 1 |
| 2  | 0.399215 | C | 1 |
| 21 | 0.456978 | D | 1 |
| 14 | 0.378494 | C | 1 |
| 1  | 0.086102 | C | 1 |
| 22 | 0.531551 | C | 1 |
| 2  | 0.22736  | C | 1 |
| 7  | 0.068284 | C | 1 |
| 1  | 0.22437  | C | 1 |
| 2  | 0.22736  | C | 1 |
| 10 | 0.550726 | C | 1 |
| 2  | 0.131201 | C | 1 |
| 1  | 0.086102 | C | 1 |
| 2  | 0.131201 | C | 1 |
| 10 | 0.550726 | C | 1 |
| 1  | 0.352404 | R | 0 |
| 21 | 0.456978 | D | 1 |
| 13 | 0.463569 | C | 1 |
| 1  | 0.352404 | R | 0 |
| 1  | 0.22437  | C | 1 |
| 3  | 0.199655 | I | 0 |
| 5  | 0.196859 | C | 1 |
| 7  | 0.561303 | C | 1 |
| 14 | 0.378494 | C | 1 |
| 3  | 0.199655 | I | 0 |
| 7  | 0.571874 | C | 1 |
| 16 | 0.643117 | C | 1 |
| 21 | 0.433365 | C | 1 |
| 5  | 0.196859 | C | 1 |
| 2  | 0.288189 | I | 0 |
| 13 | 0.364858 | C | 1 |
| 24 | 0.210867 | D | 1 |
| 22 | 0.531551 | C | 1 |
| 2  | 0.288189 | I | 0 |
| 2  | 0.18377  | C | 1 |
| 24 | 0.210867 | D | 1 |
| 7  | 0.254125 | C | 1 |
| 2  | 0.288189 | I | 0 |
| 2  | 0.387461 | C | 1 |
| 7  | 0.571874 | C | 1 |
| 8  | 0.441759 | C | 1 |
| 14 | 0.378494 | C | 1 |
| 6  | 0.660054 | C | 1 |
| 1  | 0.101367 | I | 0 |
| 7  | 0.254125 | C | 1 |
| 2  | 0.166887 | C | 1 |
| 1  | 0.315809 | C | 1 |
| 7  | 0.571874 | C | 1 |
| 19 | 0.367401 | C | 1 |
| 19 | 0.367401 | C | 1 |
| 19 | 0.367401 | C | 1 |
| 9  | 0.237379 | I | 0 |

|    |          |   |   |
|----|----------|---|---|
| 6  | 0.660054 | C | 1 |
| 2  | 0.131201 | C | 1 |
| 21 | 0.433365 | C | 1 |
| 13 | 0.364858 | C | 1 |
| 2  | 0.55466  | I | 0 |
| 13 | 0.463569 | C | 1 |
| 16 | 0.800021 | K | 1 |
| 9  | 0.237379 | I | 0 |
| 13 | 0.463569 | C | 1 |
| 1  | 0.101367 | I | 0 |
| 7  | 0.068284 | C | 1 |
| 22 | 0.531551 | C | 1 |
| 2  | 0.22736  | C | 1 |
| 22 | 0.711508 | C | 1 |
| 2  | 0.55466  | I | 0 |
| 9  | 0.112842 | I | 0 |
| 10 | 0.550726 | C | 1 |
| 22 | 0.711508 | C | 1 |
| 16 | 0.800021 | K | 1 |
| 15 | 0.290933 | C | 1 |
| 22 | 0.711508 | C | 1 |
| 1  | 0.315809 | C | 1 |
| 8  | 0.441759 | C | 1 |
| 1  | 0.101367 | I | 0 |
| 2  | 0.399215 | C | 1 |
| 13 | 0.463569 | C | 1 |
| 13 | 0.463569 | C | 1 |
| 13 | 0.463569 | C | 1 |
| 13 | 0.463569 | C | 1 |
| 9  | 0.237379 | I | 0 |
| 14 | 0.378494 | C | 1 |
| 19 | 0.367401 | C | 1 |
| 7  | 0.254125 | C | 1 |
| 2  | 0.399215 | C | 1 |
| 13 | 0.463569 | C | 1 |
| 16 | 0.56327  | C | 1 |
| 7  | 0.072823 | C | 1 |
| 2  | 0.176167 | M | 0 |
| 13 | 0.516495 | C | 1 |
| 7  | 0.19919  | C | 1 |
| 13 | 0.516495 | C | 1 |
| 16 | 0.56327  | C | 1 |
| 7  | 0.19919  | C | 1 |
| 16 | 0.56327  | C | 1 |
| 16 | 0.56327  | C | 1 |
| 16 | 0.56327  | C | 1 |
| 16 | 0.56327  | C | 1 |
| 2  | 0.176167 | M | 0 |
| 13 | 0.516495 | C | 1 |
| 16 | 0.56327  | C | 1 |
| 7  | 0.19919  | C | 1 |
| 16 | 0.56327  | C | 1 |
| 2  | 0.176167 | M | 0 |
| 16 | 0.56327  | C | 1 |



|    |          |   |   |
|----|----------|---|---|
| 13 | 0.516495 | C | 1 |
| 13 | 0.516495 | C | 1 |
| 7  | 0.19919  | C | 1 |
| 7  | 0.19919  | C | 1 |
| 7  | 0.072823 | C | 1 |
| 16 | 0.56327  | C | 1 |
| 16 | 0.56327  | C | 1 |
| 13 | 0.516495 | C | 1 |
| 16 | 0.56327  | C | 1 |
| 13 | 0.516495 | C | 1 |
| 16 | 0.56327  | C | 1 |
| 16 | 0.56327  | C | 1 |
| 16 | 0.56327  | C | 1 |
| 7  | 0.072823 | C | 1 |
| 13 | 0.516495 | C | 1 |
| 21 | 0.566641 | C | 1 |
| 21 | 0.566641 | C | 1 |
| 21 | 0.566641 | C | 1 |
| 21 | 0.566641 | C | 1 |
| 21 | 0.566641 | C | 1 |
| 21 | 0.566641 | C | 1 |
| 21 | 0.566641 | C | 1 |
| 21 | 0.566641 | C | 1 |
| 21 | 0.566641 | C | 1 |
| 21 | 0.566641 | C | 1 |
| 18 | 0.449672 | C | 1 |
| 13 | 0.072278 | C | 1 |
| 13 | 0.072278 | C | 1 |
| 18 | 0.449672 | C | 1 |
| 13 | 0.072278 | C | 1 |
| 13 | 0.072278 | C | 1 |
| 18 | 0.449672 | C | 1 |
| 13 | 0.072278 | C | 1 |
| 13 | 0.072278 | C | 1 |
| 18 | 0.449672 | C | 1 |
| 13 | 0.072278 | C | 1 |
| 13 | 0.072278 | C | 1 |
| 18 | 0.449672 | C | 1 |
| 14 | 0.688009 | C | 1 |
| 6  | 0.069774 | C | 1 |
| 6  | 0.462146 | C | 1 |
| 1  | 0.225713 | C | 1 |
| 8  | 0.266561 | I | 0 |
| 6  | 0.462146 | C | 1 |
| 13 | 0.58271  | C | 1 |
| 5  | 0.518984 | C | 1 |
| 1  | 0.225713 | C | 1 |
| 7  | 0.607442 | C | 1 |
| 1  | 0.220033 | C | 1 |
| 14 | 0.51904  | C | 1 |
| 1  | 0.157259 | C | 1 |
| 7  | 0.687385 | C | 1 |
| 2  | 0.235983 | C | 1 |

|    |          |   |   |
|----|----------|---|---|
| 13 | 0.58271  | C | 1 |
| 7  | 0.492606 | C | 1 |
| 24 | 0.567309 | C | 1 |
| 19 | 0.241196 | C | 1 |
| 2  | 0.581662 | C | 1 |
| 6  | 0.661202 | C | 1 |
| 7  | 0.687385 | C | 1 |
| 6  | 0.069774 | C | 1 |
| 3  | 0.458569 | C | 1 |
| 7  | 0.607442 | C | 1 |
| 17 | 0.554658 | C | 1 |
| 1  | 0.157259 | C | 1 |
| 7  | 0.607442 | C | 1 |
| 7  | 0.607442 | C | 1 |
| 18 | 0.902418 | C | 1 |
| 1  | 0.352332 | C | 1 |
| 20 | 0.24138  | C | 1 |
| 14 | 0.688009 | C | 1 |
| 3  | 0.458569 | C | 1 |
| 5  | 0.518984 | C | 1 |
| 14 | 0.688009 | C | 1 |
| 8  | 0.266561 | I | 0 |
| 14 | 0.51904  | C | 1 |
| 24 | 0.567309 | C | 1 |
| 1  | 0.121559 | C | 1 |
| 1  | 0.121559 | C | 1 |
| 1  | 0.209511 | C | 1 |
| 6  | 0.369783 | C | 1 |
| 18 | 0.902418 | C | 1 |
| 1  | 0.284192 | C | 1 |
| 7  | 0.607442 | C | 1 |
| 7  | 0.440507 | R | 0 |
| 1  | 0.225713 | C | 1 |
| 1  | 0.174231 | C | 1 |
| 20 | 0.24138  | C | 1 |
| 2  | 0.235983 | C | 1 |
| 13 | 0.58271  | C | 1 |
| 1  | 0.121559 | C | 1 |
| 1  | 0.209511 | C | 1 |
| 14 | 0.458716 | C | 1 |
| 7  | 0.687385 | C | 1 |
| 14 | 0.145664 | C | 1 |
| 14 | 0.688009 | C | 1 |
| 20 | 0.64302  | C | 1 |
| 14 | 0.458716 | C | 1 |
| 7  | 0.26026  | C | 1 |
| 20 | 0.24138  | C | 1 |
| 1  | 0.352332 | C | 1 |
| 1  | 0.077227 | C | 1 |
| 13 | 0.58271  | C | 1 |
| 1  | 0.121559 | C | 1 |
| 6  | 0.069774 | C | 1 |
| 8  | 0.266561 | I | 0 |
| 5  | 0.518984 | C | 1 |

|    |          |   |   |
|----|----------|---|---|
| 6  | 0.661202 | C | 1 |
| 1  | 0.073589 | C | 1 |
| 6  | 0.069774 | C | 1 |
| 13 | 0.58271  | C | 1 |
| 7  | 0.440507 | R | 0 |
| 7  | 0.687385 | C | 1 |
| 6  | 0.462146 | C | 1 |
| 8  | 0.266561 | I | 0 |
| 1  | 0.352332 | C | 1 |
| 14 | 0.145664 | C | 1 |
| 7  | 0.607442 | C | 1 |
| 5  | 0.518984 | C | 1 |
| 6  | 0.069774 | C | 1 |
| 18 | 0.578474 | C | 1 |
| 5  | 0.428907 | C | 1 |
| 5  | 0.428907 | C | 1 |
| 6  | 0.245061 | C | 1 |
| 1  | 0.077227 | C | 1 |
| 20 | 0.64302  | C | 1 |
| 7  | 0.440507 | R | 0 |
| 6  | 0.462146 | C | 1 |
| 6  | 0.369783 | C | 1 |
| 18 | 0.578474 | C | 1 |
| 19 | 0.241196 | C | 1 |
| 14 | 0.458716 | C | 1 |
| 6  | 0.369783 | C | 1 |
| 18 | 0.902418 | C | 1 |
| 6  | 0.069774 | C | 1 |
| 24 | 0.567309 | C | 1 |
| 7  | 0.440507 | R | 0 |
| 20 | 0.64302  | C | 1 |
| 5  | 0.428907 | C | 1 |
| 5  | 0.249002 | C | 1 |
| 2  | 0.581662 | C | 1 |
| 17 | 0.554658 | C | 1 |
| 20 | 0.64302  | C | 1 |
| 13 | 0.58271  | C | 1 |
| 13 | 0.58271  | C | 1 |
| 13 | 0.58271  | C | 1 |
| 6  | 0.245061 | C | 1 |
| 7  | 0.687385 | C | 1 |
| 6  | 0.245061 | C | 1 |
| 18 | 0.902418 | C | 1 |
| 8  | 0.266561 | I | 0 |
| 1  | 0.209511 | C | 1 |
| 7  | 0.607442 | C | 1 |
| 1  | 0.077227 | C | 1 |
| 1  | 0.220033 | C | 1 |
| 1  | 0.284192 | C | 1 |
| 19 | 0.241196 | C | 1 |
| 14 | 0.458716 | C | 1 |
| 5  | 0.518984 | C | 1 |
| 5  | 0.428907 | C | 1 |
| 1  | 0.209511 | C | 1 |

|    |          |   |   |
|----|----------|---|---|
| 7  | 0.492606 | C | 1 |
| 14 | 0.688009 | C | 1 |
| 17 | 0.554658 | C | 1 |
| 7  | 0.26026  | C | 1 |
| 1  | 0.284192 | C | 1 |
| 1  | 0.174231 | C | 1 |
| 6  | 0.661202 | C | 1 |
| 6  | 0.661202 | C | 1 |
| 6  | 0.661202 | C | 1 |
| 6  | 0.661202 | C | 1 |
| 6  | 0.661202 | C | 1 |
| 1  | 0.121559 | C | 1 |
| 3  | 0.458569 | C | 1 |
| 18 | 0.902418 | C | 1 |
| 5  | 0.518984 | C | 1 |
| 3  | 0.458569 | C | 1 |
| 6  | 0.245061 | C | 1 |
| 14 | 0.51904  | C | 1 |
| 17 | 0.554658 | C | 1 |
| 7  | 0.440507 | R | 0 |
| 22 | 0.54165  | C | 1 |
| 7  | 0.687385 | C | 1 |
| 14 | 0.51904  | C | 1 |
| 1  | 0.209511 | C | 1 |
| 1  | 0.209511 | C | 1 |
| 18 | 0.902418 | C | 1 |
| 1  | 0.077227 | C | 1 |
| 8  | 0.266561 | I | 0 |
| 13 | 0.58271  | C | 1 |
| 19 | 0.241196 | C | 1 |
| 7  | 0.687385 | C | 1 |
| 6  | 0.245061 | C | 1 |
| 20 | 0.24138  | C | 1 |
| 19 | 0.241196 | C | 1 |
| 6  | 0.462146 | C | 1 |
| 19 | 0.241196 | C | 1 |
| 18 | 0.902418 | C | 1 |
| 1  | 0.073589 | C | 1 |
| 6  | 0.661202 | C | 1 |
| 7  | 0.492606 | C | 1 |
| 17 | 0.554658 | C | 1 |
| 1  | 0.209511 | C | 1 |
| 14 | 0.688009 | C | 1 |
| 14 | 0.688009 | C | 1 |
| 14 | 0.688009 | C | 1 |
| 20 | 0.24138  | C | 1 |
| 14 | 0.688009 | C | 1 |
| 6  | 0.069774 | C | 1 |
| 24 | 0.567309 | C | 1 |
| 18 | 0.578474 | C | 1 |
| 5  | 0.249002 | C | 1 |
| 3  | 0.458569 | C | 1 |
| 22 | 0.54165  | C | 1 |
| 14 | 0.688009 | C | 1 |

|    |          |   |   |
|----|----------|---|---|
| 24 | 0.567309 | C | 1 |
| 17 | 0.554658 | C | 1 |
| 20 | 0.64302  | C | 1 |
| 6  | 0.369783 | C | 1 |
| 13 | 0.58271  | C | 1 |
| 2  | 0.581662 | C | 1 |
| 20 | 0.64302  | C | 1 |
| 16 | 0.155767 | C | 1 |
| 14 | 0.51904  | C | 1 |
| 14 | 0.51904  | C | 1 |
| 19 | 0.241196 | C | 1 |
| 24 | 0.567309 | C | 1 |
| 20 | 0.64302  | C | 1 |
| 6  | 0.661202 | C | 1 |
| 1  | 0.225713 | C | 1 |
| 3  | 0.458569 | C | 1 |
| 1  | 0.157259 | C | 1 |
| 5  | 0.249002 | C | 1 |
| 17 | 0.554658 | C | 1 |
| 24 | 0.567309 | C | 1 |
| 7  | 0.26026  | C | 1 |
| 14 | 0.688009 | C | 1 |
| 24 | 0.567309 | C | 1 |
| 7  | 0.687385 | C | 1 |
| 7  | 0.687385 | C | 1 |
| 7  | 0.687385 | C | 1 |
| 14 | 0.145664 | C | 1 |
| 7  | 0.687385 | C | 1 |
| 7  | 0.687385 | C | 1 |
| 7  | 0.492606 | C | 1 |
| 7  | 0.440507 | R | 0 |
| 5  | 0.428907 | C | 1 |
| 1  | 0.077227 | C | 1 |
| 20 | 0.64302  | C | 1 |
| 7  | 0.492606 | C | 1 |
| 14 | 0.51904  | C | 1 |
| 7  | 0.26026  | C | 1 |
| 19 | 0.241196 | C | 1 |
| 19 | 0.241196 | C | 1 |
| 3  | 0.458569 | C | 1 |
| 22 | 0.54165  | C | 1 |
| 1  | 0.220033 | C | 1 |
| 2  | 0.581662 | C | 1 |
| 14 | 0.458716 | C | 1 |
| 6  | 0.661202 | C | 1 |
| 14 | 0.688009 | C | 1 |
| 22 | 0.54165  | C | 1 |
| 6  | 0.462146 | C | 1 |
| 18 | 0.578474 | C | 1 |
| 14 | 0.51904  | C | 1 |
| 14 | 0.51904  | C | 1 |
| 14 | 0.145664 | C | 1 |
| 1  | 0.284192 | C | 1 |
| 24 | 0.567309 | C | 1 |

|    |          |   |   |
|----|----------|---|---|
| 5  | 0.249002 | C | 1 |
| 1  | 0.220033 | C | 1 |
| 18 | 0.50906  | C | 1 |
| 24 | 0.567309 | C | 1 |
| 19 | 0.241196 | C | 1 |
| 1  | 0.220033 | C | 1 |
| 18 | 0.902418 | C | 1 |
| 13 | 0.58271  | C | 1 |
| 17 | 0.554658 | C | 1 |
| 17 | 0.554658 | C | 1 |
| 16 | 0.155767 | C | 1 |
| 5  | 0.518984 | C | 1 |
| 13 | 0.58271  | C | 1 |
| 5  | 0.428907 | C | 1 |
| 7  | 0.607442 | C | 1 |
| 7  | 0.687385 | C | 1 |
| 6  | 0.245061 | C | 1 |
| 1  | 0.174231 | C | 1 |
| 1  | 0.073589 | C | 1 |
| 14 | 0.51904  | C | 1 |
| 19 | 0.241196 | C | 1 |
| 1  | 0.209511 | C | 1 |
| 6  | 0.462146 | C | 1 |
| 13 | 0.58271  | C | 1 |
| 7  | 0.492606 | C | 1 |
| 18 | 0.902418 | C | 1 |
| 7  | 0.687385 | C | 1 |
| 14 | 0.458716 | C | 1 |
| 7  | 0.26026  | C | 1 |
| 2  | 0.581662 | C | 1 |
| 5  | 0.249002 | C | 1 |
| 2  | 0.581662 | C | 1 |
| 20 | 0.64302  | C | 1 |
| 13 | 0.58271  | C | 1 |
| 14 | 0.458716 | C | 1 |
| 13 | 0.58271  | C | 1 |
| 18 | 0.578474 | C | 1 |
| 5  | 0.428907 | C | 1 |
| 24 | 0.567309 | C | 1 |
| 14 | 0.51904  | C | 1 |
| 5  | 0.428907 | C | 1 |
| 7  | 0.492606 | C | 1 |
| 14 | 0.51904  | C | 1 |
| 3  | 0.458569 | C | 1 |
| 7  | 0.607442 | C | 1 |
| 7  | 0.492606 | C | 1 |
| 20 | 0.24138  | C | 1 |
| 7  | 0.687385 | C | 1 |
| 14 | 0.145664 | C | 1 |
| 13 | 0.58271  | C | 1 |
| 16 | 0.155767 | C | 1 |
| 14 | 0.51904  | C | 1 |
| 19 | 0.241196 | C | 1 |
| 6  | 0.069774 | C | 1 |

|    |          |   |   |
|----|----------|---|---|
| 14 | 0.688009 | C | 1 |
| 5  | 0.518984 | C | 1 |
| 19 | 0.241196 | C | 1 |
| 19 | 0.241196 | C | 1 |
| 7  | 0.607442 | C | 1 |
| 13 | 0.58271  | C | 1 |
| 19 | 0.241196 | C | 1 |
| 6  | 0.661202 | C | 1 |
| 6  | 0.369783 | C | 1 |
| 1  | 0.225713 | C | 1 |
| 18 | 0.50906  | C | 1 |
| 18 | 0.50906  | C | 1 |
| 6  | 0.462146 | C | 1 |
| 13 | 0.58271  | C | 1 |
| 2  | 0.235983 | C | 1 |
| 14 | 0.51904  | C | 1 |
| 1  | 0.077227 | C | 1 |
| 24 | 0.567309 | C | 1 |
| 6  | 0.661202 | C | 1 |
| 1  | 0.225713 | C | 1 |
| 24 | 0.567309 | C | 1 |
| 14 | 0.458716 | C | 1 |
| 7  | 0.492606 | C | 1 |
| 6  | 0.069774 | C | 1 |
| 18 | 0.902418 | C | 1 |
| 19 | 0.241196 | C | 1 |
| 8  | 0.266561 | I | 0 |
| 6  | 0.462146 | C | 1 |
| 7  | 0.687385 | C | 1 |
| 18 | 0.902418 | C | 1 |
| 22 | 0.54165  | C | 1 |
| 22 | 0.54165  | C | 1 |
| 1  | 0.284192 | C | 1 |
| 20 | 0.64302  | C | 1 |
| 1  | 0.077227 | C | 1 |
| 6  | 0.462146 | C | 1 |
| 20 | 0.64302  | C | 1 |
| 20 | 0.64302  | C | 1 |
| 7  | 0.607442 | C | 1 |
| 17 | 0.404608 | C | 1 |
| 17 | 0.59961  | C | 1 |
| 17 | 0.59961  | C | 1 |
| 19 | 0.702741 | C | 1 |
| 19 | 0.702741 | C | 1 |
| 17 | 0.59961  | C | 1 |
| 11 | 0.332827 | C | 1 |
| 20 | 0.92085  | C | 1 |
| 17 | 0.404608 | C | 1 |
| 18 | 0.474206 | I | 0 |
| 17 | 0.404608 | C | 1 |
| 18 | 0.49529  | C | 1 |
| 17 | 0.59961  | C | 1 |
| 17 | 0.404608 | C | 1 |
| 19 | 0.702741 | C | 1 |

|    |          |   |   |
|----|----------|---|---|
| 20 | 0.92085  | C | 1 |
| 1  | 0.250903 | C | 1 |
| 17 | 0.404608 | C | 1 |
| 17 | 0.59961  | C | 1 |
| 19 | 0.702741 | C | 1 |
| 17 | 0.404608 | C | 1 |
| 19 | 0.702741 | C | 1 |
| 18 | 0.474206 | I | 0 |
| 19 | 0.702741 | C | 1 |
| 14 | 0.607481 | C | 1 |
| 14 | 0.607481 | C | 1 |
| 24 | 0.345081 | C | 1 |
| 19 | 0.702741 | C | 1 |
| 20 | 0.433856 | C | 1 |
| 20 | 0.92085  | C | 1 |
| 20 | 0.92085  | C | 1 |
| 9  | 0.33603  | C | 1 |
| 19 | 0.695278 | C | 1 |
| 11 | 0.332827 | C | 1 |
| 20 | 0.92085  | C | 1 |
| 2  | 0.177896 | C | 1 |
| 20 | 0.433856 | C | 1 |
| 20 | 0.92085  | C | 1 |
| 17 | 0.404608 | C | 1 |
| 20 | 0.92085  | C | 1 |
| 24 | 0.345081 | C | 1 |
| 14 | 0.607481 | C | 1 |
| 24 | 0.345081 | C | 1 |
| 18 | 0.474206 | I | 0 |
| 24 | 0.345081 | C | 1 |
| 19 | 0.702741 | C | 1 |
| 7  | 0.39457  | C | 1 |
| 19 | 0.702741 | C | 1 |
| 9  | 0.33603  | C | 1 |
| 17 | 0.404608 | C | 1 |
| 19 | 0.695278 | C | 1 |
| 19 | 0.695278 | C | 1 |
| 18 | 0.49529  | C | 1 |
| 19 | 0.695278 | C | 1 |
| 19 | 0.695278 | C | 1 |
| 20 | 0.92085  | C | 1 |
| 17 | 0.404608 | C | 1 |
| 19 | 0.695278 | C | 1 |
| 17 | 0.59961  | C | 1 |
| 20 | 0.433856 | C | 1 |
| 11 | 0.332827 | C | 1 |
| 17 | 0.404608 | C | 1 |
| 20 | 0.433856 | C | 1 |
| 2  | 0.177896 | C | 1 |
| 9  | 0.33603  | C | 1 |
| 18 | 0.474206 | I | 0 |
| 24 | 0.345081 | C | 1 |
| 17 | 0.404608 | C | 1 |
| 20 | 0.433856 | C | 1 |



|    |          |   |   |
|----|----------|---|---|
| 14 | 0.607481 | C | 1 |
| 18 | 0.474206 | I | 0 |
| 24 | 0.345081 | C | 1 |
| 19 | 0.695278 | C | 1 |
| 18 | 0.474206 | I | 0 |
| 2  | 0.177896 | C | 1 |
| 14 | 0.607481 | C | 1 |
| 9  | 0.33603  | C | 1 |
| 19 | 0.702741 | C | 1 |
| 20 | 0.92085  | C | 1 |
| 18 | 0.49529  | C | 1 |
| 17 | 0.59961  | C | 1 |
| 24 | 0.345081 | C | 1 |
| 17 | 0.404608 | C | 1 |
| 17 | 0.404608 | C | 1 |
| 9  | 0.33603  | C | 1 |
| 18 | 0.474206 | I | 0 |
| 24 | 0.345081 | C | 1 |
| 14 | 0.607481 | C | 1 |
| 11 | 0.332827 | C | 1 |
| 19 | 0.695278 | C | 1 |
| 20 | 0.92085  | C | 1 |
| 7  | 0.39457  | C | 1 |
| 19 | 0.695278 | C | 1 |
| 17 | 0.59961  | C | 1 |
| 17 | 0.404608 | C | 1 |
| 24 | 0.345081 | C | 1 |
| 7  | 0.39457  | C | 1 |
| 19 | 0.695278 | C | 1 |
| 17 | 0.404608 | C | 1 |
| 7  | 0.39457  | C | 1 |
| 19 | 0.695278 | C | 1 |
| 24 | 0.345081 | C | 1 |
| 7  | 0.39457  | C | 1 |
| 18 | 0.49529  | C | 1 |
| 20 | 0.433856 | C | 1 |
| 18 | 0.474206 | I | 0 |
| 17 | 0.404608 | C | 1 |
| 17 | 0.59961  | C | 1 |
| 18 | 0.474206 | I | 0 |
| 7  | 0.39457  | C | 1 |
| 24 | 0.345081 | C | 1 |
| 18 | 0.474206 | I | 0 |
| 19 | 0.695278 | C | 1 |
| 19 | 0.702741 | C | 1 |
| 7  | 0.39457  | C | 1 |
| 20 | 0.92085  | C | 1 |
| 14 | 0.607481 | C | 1 |
| 19 | 0.702741 | C | 1 |
| 19 | 0.695278 | C | 1 |
| 19 | 0.702741 | C | 1 |
| 19 | 0.695278 | C | 1 |
| 17 | 0.59961  | C | 1 |
| 17 | 0.59961  | C | 1 |

|    |          |   |   |
|----|----------|---|---|
| 19 | 0.695278 | C | 1 |
| 17 | 0.59961  | C | 1 |
| 20 | 0.92085  | C | 1 |
| 7  | 0.39457  | C | 1 |
| 19 | 0.702741 | C | 1 |
| 18 | 0.474206 | I | 0 |
| 19 | 0.702741 | C | 1 |
| 18 | 0.49529  | C | 1 |
| 20 | 0.433856 | C | 1 |
| 24 | 0.345081 | C | 1 |
| 11 | 0.332827 | C | 1 |
| 20 | 0.92085  | C | 1 |
| 7  | 0.39457  | C | 1 |
| 19 | 0.695278 | C | 1 |
| 2  | 0.177896 | C | 1 |
| 18 | 0.49529  | C | 1 |
| 18 | 0.474206 | I | 0 |
| 1  | 0.250903 | C | 1 |
| 19 | 0.702741 | C | 1 |
| 24 | 0.345081 | C | 1 |
| 1  | 0.250903 | C | 1 |
| 2  | 0.177896 | C | 1 |
| 21 | 0.572642 | C | 1 |
| 21 | 0.572642 | C | 1 |
| 20 | 0.593054 | C | 1 |
| 20 | 0.593054 | C | 1 |
| 20 | 0.593054 | C | 1 |
| 20 | 0.593054 | C | 1 |
| 20 | 0.593054 | C | 1 |
| 20 | 0.593054 | C | 1 |
| 20 | 0.593054 | C | 1 |
| 20 | 0.593054 | C | 1 |
| 5  | 0.475341 | L | 0 |
| 21 | 0.572642 | C | 1 |
| 20 | 0.593054 | C | 1 |
| 21 | 0.572642 | C | 1 |
| 21 | 0.572642 | C | 1 |
| 5  | 0.475341 | L | 0 |
| 20 | 0.593054 | C | 1 |
| 5  | 0.475341 | L | 0 |
| 20 | 0.593054 | C | 1 |
| 20 | 0.593054 | C | 1 |
| 5  | 0.475341 | L | 0 |
| 20 | 0.593054 | C | 1 |
| 5  | 0.475341 | L | 0 |
| 20 | 0.593054 | C | 1 |
| 20 | 0.593054 | C | 1 |
| 21 | 0.572642 | C | 1 |
| 20 | 0.593054 | C | 1 |
| 20 | 0.593054 | C | 1 |
| 20 | 0.593054 | C | 1 |
| 19 | 0.731377 | B | 1 |
| 19 | 0.731377 | B | 1 |
| 19 | 0.731377 | B | 1 |

|               |   |
|---------------|---|
| 19 0.731377 B | 1 |
| 19 0.573641 B | 1 |
| 19 0.573641 B | 1 |
| 19 0.573641 B | 1 |
| 21 0.602868 C | 1 |
| 11 0.552103 C | 1 |
| 11 0.552103 C | 1 |
| 11 0.552103 C | 1 |
| 2 0.459762 C  | 1 |
| 21 0.602868 C | 1 |
| 11 0.552103 C | 1 |
| 11 0.552103 C | 1 |
| 21 0.602868 C | 1 |
| 21 0.602868 C | 1 |
| 2 0.459762 C  | 1 |
| 21 0.602868 C | 1 |
| 21 0.602868 C | 1 |
| 21 0.602868 C | 1 |
| 11 0.552103 C | 1 |
| 2 0.459762 C  | 1 |
| 21 0.602868 C | 1 |
| 11 0.552103 C | 1 |
| 21 0.602868 C | 1 |
| 11 0.552103 C | 1 |
| 11 0.552103 C | 1 |
| 21 0.602868 C | 1 |
| 11 0.552103 C | 1 |
| 11 0.552103 C | 1 |
| 2 0.459762 C  | 1 |
| 2 0.459762 C  | 1 |
| 11 0.552103 C | 1 |
| 11 0.552103 C | 1 |
| 21 0.602868 C | 1 |
| 10 0.231485 C | 1 |
| 10 0.231485 C | 1 |
| 13 0.505737 B | 1 |
| 13 0.505737 B | 1 |
| 13 0.505737 B | 1 |
| 13 0.505737 B | 1 |
| 10 0.231485 C | 1 |
| 13 0.505737 B | 1 |
| 13 0.505737 B | 1 |
| 13 0.505737 B | 1 |
| 13 0.505737 B | 1 |
| 13 0.505737 B | 1 |
| 13 0.505737 B | 1 |
| 13 0.505737 B | 1 |
| 10 0.231485 C | 1 |
| 10 0.231485 C | 1 |
| 13 0.505737 B | 1 |
| 13 0.505737 B | 1 |
| 19 0.764294 C | 1 |

|    |          |   |   |
|----|----------|---|---|
| 19 | 0.764294 | C | 1 |
| 19 | 0.764294 | C | 1 |
| 19 | 0.764294 | C | 1 |
| 19 | 0.764294 | C | 1 |
| 14 | 0.438533 | I | 0 |
| 14 | 0.49213  | C | 1 |
| 6  | 0.455516 | C | 1 |
| 1  | 0.315621 | C | 1 |
| 7  | 0.522116 | C | 1 |
| 17 | 0.449002 | F | 0 |
| 7  | 0.406563 | C | 1 |
| 7  | 0.541837 | C | 1 |
| 23 | 0.532298 | C | 1 |
| 7  | 0.541837 | C | 1 |
| 8  | 0.445596 | I | 0 |
| 8  | 0.433951 | C | 1 |
| 1  | 0.371391 | C | 1 |
| 18 | 0.601057 | C | 1 |
| 6  | 0.586155 | N | 0 |
| 9  | 0.480939 | C | 1 |
| 10 | 0.611543 | E | 1 |
| 7  | 0.272123 | C | 1 |
| 7  | 0.522116 | C | 1 |
| 1  | 0.262508 | C | 1 |
| 7  | 0.272123 | C | 1 |
| 2  | 0.14772  | C | 1 |
| 8  | 0.448249 | I | 0 |
| 1  | 0.386344 | C | 1 |
| 18 | 0.601057 | C | 1 |
| 7  | 0.585103 | C | 1 |
| 8  | 0.433951 | C | 1 |
| 6  | 0.601226 | Q | 0 |
| 14 | 0.438533 | I | 0 |
| 1  | 0.371391 | C | 1 |
| 7  | 0.374684 | D | 1 |
| 2  | 0.589158 | C | 1 |
| 8  | 0.433951 | C | 1 |
| 7  | 0.42267  | C | 1 |
| 9  | 0.503446 | C | 1 |
| 1  | 0.386344 | C | 1 |
| 8  | 0.448249 | I | 0 |
| 9  | 0.503446 | C | 1 |
| 8  | 0.448249 | I | 0 |
| 9  | 0.480939 | C | 1 |
| 1  | 0.315621 | C | 1 |
| 7  | 0.145854 | R | 0 |
| 21 | 0.373694 | R | 0 |
| 6  | 0.601268 | C | 1 |
| 24 | 0.709999 | F | 0 |
| 6  | 0.62758  | C | 1 |
| 7  | 0.585103 | C | 1 |
| 8  | 0.734056 | I | 0 |
| 9  | 0.480939 | C | 1 |
| 18 | 0.601057 | C | 1 |

|    |          |   |   |
|----|----------|---|---|
| 6  | 0.62758  | C | 1 |
| 10 | 0.563235 | C | 1 |
| 19 | 0.315513 | C | 1 |
| 7  | 0.272123 | C | 1 |
| 6  | 0.334951 | C | 1 |
| 6  | 0.089364 | I | 0 |
| 8  | 0.433951 | C | 1 |
| 7  | 0.272123 | C | 1 |
| 15 | 0.256547 | I | 0 |
| 14 | 0.438533 | I | 0 |
| 8  | 0.445596 | I | 0 |
| 7  | 0.585103 | C | 1 |
| 9  | 0.480939 | C | 1 |
| 7  | 0.230729 | C | 1 |
| 6  | 0.57168  | C | 1 |
| 10 | 0.563235 | C | 1 |
| 9  | 0.503446 | C | 1 |
| 7  | 0.434132 | C | 1 |
| 8  | 0.247445 | I | 0 |
| 6  | 0.601226 | Q | 0 |
| 9  | 0.503446 | C | 1 |
| 21 | 0.187781 | C | 1 |
| 14 | 0.49213  | C | 1 |
| 1  | 0.262508 | C | 1 |
| 14 | 0.56525  | E | 1 |
| 6  | 0.455516 | C | 1 |
| 8  | 0.433951 | C | 1 |
| 6  | 0.455516 | C | 1 |
| 21 | 0.187781 | C | 1 |
| 10 | 0.563235 | C | 1 |
| 17 | 0.280398 | R | 0 |
| 8  | 0.433951 | C | 1 |
| 23 | 0.532298 | C | 1 |
| 8  | 0.448249 | I | 0 |
| 7  | 0.272123 | C | 1 |
| 18 | 0.601057 | C | 1 |
| 1  | 0.315621 | C | 1 |
| 7  | 0.522116 | C | 1 |
| 9  | 0.214214 | I | 0 |
| 10 | 0.611543 | E | 1 |
| 6  | 0.334951 | C | 1 |
| 6  | 0.601226 | Q | 0 |
| 14 | 0.56525  | E | 1 |
| 9  | 0.503446 | C | 1 |
| 8  | 0.433951 | C | 1 |
| 17 | 0.449002 | F | 0 |
| 1  | 0.386344 | C | 1 |
| 7  | 0.406563 | C | 1 |
| 7  | 0.748514 | C | 1 |
| 21 | 0.187781 | C | 1 |
| 6  | 0.62758  | C | 1 |
| 9  | 0.302099 | C | 1 |
| 8  | 0.448249 | I | 0 |
| 7  | 0.197784 | I | 0 |

|    |          |   |   |
|----|----------|---|---|
| 9  | 0.302099 | C | 1 |
| 7  | 0.748514 | C | 1 |
| 7  | 0.548074 | C | 1 |
| 8  | 0.734056 | I | 0 |
| 7  | 0.541837 | C | 1 |
| 6  | 0.601268 | C | 1 |
| 13 | 0.179841 | C | 1 |
| 13 | 0.226451 | C | 1 |
| 10 | 0.563235 | C | 1 |
| 8  | 0.448249 | I | 0 |
| 6  | 0.389478 | C | 1 |
| 24 | 0.774624 | C | 1 |
| 24 | 0.709999 | F | 0 |
| 1  | 0.332968 | C | 1 |
| 5  | 0.367306 | I | 0 |
| 7  | 0.42267  | C | 1 |
| 10 | 0.611543 | E | 1 |
| 6  | 0.455516 | C | 1 |
| 1  | 0.257455 | I | 0 |
| 8  | 0.445596 | I | 0 |
| 6  | 0.601226 | Q | 0 |
| 14 | 0.56525  | E | 1 |
| 21 | 0.387428 | Q | 0 |
| 8  | 0.535273 | C | 1 |
| 10 | 0.563235 | C | 1 |
| 7  | 0.434132 | C | 1 |
| 18 | 0.601057 | C | 1 |
| 5  | 0.213268 | Q | 0 |
| 7  | 0.272123 | C | 1 |
| 2  | 0.590765 | C | 1 |
| 14 | 0.438533 | I | 0 |
| 9  | 0.503446 | C | 1 |
| 14 | 0.49213  | C | 1 |
| 24 | 0.709999 | F | 0 |
| 24 | 0.709999 | F | 0 |
| 2  | 0.155071 | C | 1 |
| 10 | 0.529779 | C | 1 |
| 15 | 0.256547 | I | 0 |
| 7  | 0.522116 | C | 1 |
| 24 | 0.709999 | F | 0 |
| 6  | 0.089364 | I | 0 |
| 21 | 0.187781 | C | 1 |
| 6  | 0.455516 | C | 1 |
| 6  | 0.601226 | Q | 0 |
| 9  | 0.480939 | C | 1 |
| 1  | 0.386344 | C | 1 |
| 8  | 0.433951 | C | 1 |
| 7  | 0.406563 | C | 1 |
| 7  | 0.441192 | R | 0 |
| 13 | 0.480685 | L | 0 |
| 6  | 0.601226 | Q | 0 |
| 21 | 0.373694 | R | 0 |
| 10 | 0.529779 | C | 1 |
| 7  | 0.145854 | R | 0 |

|    |          |   |   |
|----|----------|---|---|
| 21 | 0.387428 | Q | 0 |
| 14 | 0.56525  | E | 1 |
| 2  | 0.110476 | C | 1 |
| 8  | 0.247445 | I | 0 |
| 10 | 0.563235 | C | 1 |
| 13 | 0.226451 | C | 1 |
| 7  | 0.272123 | C | 1 |
| 7  | 0.434132 | C | 1 |
| 24 | 0.709999 | F | 0 |
| 7  | 0.112749 | C | 1 |
| 13 | 0.226451 | C | 1 |
| 7  | 0.548074 | C | 1 |
| 1  | 0.262508 | C | 1 |
| 1  | 0.274455 | C | 1 |
| 7  | 0.145854 | R | 0 |
| 8  | 0.445596 | I | 0 |
| 7  | 0.112749 | C | 1 |
| 1  | 0.143578 | C | 1 |
| 13 | 0.226451 | C | 1 |
| 7  | 0.522116 | C | 1 |
| 7  | 0.522116 | C | 1 |
| 7  | 0.522116 | C | 1 |
| 23 | 0.532298 | C | 1 |
| 15 | 0.256547 | I | 0 |
| 8  | 0.445596 | I | 0 |
| 13 | 0.480685 | L | 0 |
| 2  | 0.589158 | C | 1 |
| 2  | 0.155071 | C | 1 |
| 18 | 0.601057 | C | 1 |
| 8  | 0.445596 | I | 0 |
| 24 | 0.709999 | F | 0 |
| 18 | 0.601057 | C | 1 |
| 7  | 0.522116 | C | 1 |
| 6  | 0.601226 | Q | 0 |
| 5  | 0.213268 | Q | 0 |
| 7  | 0.197784 | I | 0 |
| 7  | 0.112749 | C | 1 |
| 10 | 0.611543 | E | 1 |
| 23 | 0.532298 | C | 1 |
| 16 | 0.458494 | C | 1 |
| 6  | 0.601268 | C | 1 |
| 7  | 0.748514 | C | 1 |
| 14 | 0.49213  | C | 1 |
| 10 | 0.563235 | C | 1 |
| 21 | 0.387428 | Q | 0 |
| 24 | 0.709999 | F | 0 |
| 20 | 0.28326  | I | 0 |
| 6  | 0.586155 | N | 0 |
| 6  | 0.586155 | N | 0 |
| 7  | 0.522116 | C | 1 |
| 6  | 0.089364 | I | 0 |
| 20 | 0.28326  | I | 0 |
| 6  | 0.601268 | C | 1 |
| 17 | 0.449002 | F | 0 |

|    |          |   |   |
|----|----------|---|---|
| 21 | 0.187781 | C | 1 |
| 20 | 0.28326  | I | 0 |
| 8  | 0.535273 | C | 1 |
| 13 | 0.179841 | C | 1 |
| 9  | 0.480939 | C | 1 |
| 6  | 0.601268 | C | 1 |
| 8  | 0.448249 | I | 0 |
| 6  | 0.334951 | C | 1 |
| 6  | 0.089364 | I | 0 |
| 8  | 0.535273 | C | 1 |
| 2  | 0.590765 | C | 1 |
| 14 | 0.49213  | C | 1 |
| 1  | 0.274455 | C | 1 |
| 7  | 0.230729 | C | 1 |
| 14 | 0.099193 | R | 0 |
| 16 | 0.458494 | C | 1 |
| 8  | 0.445596 | I | 0 |
| 9  | 0.503446 | C | 1 |
| 18 | 0.601057 | C | 1 |
| 6  | 0.601226 | Q | 0 |
| 7  | 0.548074 | C | 1 |
| 18 | 0.601057 | C | 1 |
| 5  | 0.104296 | C | 1 |
| 7  | 0.112749 | C | 1 |
| 7  | 0.748514 | C | 1 |
| 15 | 0.256547 | I | 0 |
| 6  | 0.57168  | C | 1 |
| 8  | 0.734056 | I | 0 |
| 5  | 0.104296 | C | 1 |
| 23 | 0.532298 | C | 1 |
| 7  | 0.145854 | R | 0 |
| 6  | 0.57168  | C | 1 |
| 5  | 0.104296 | C | 1 |
| 13 | 0.226451 | C | 1 |
| 8  | 0.445596 | I | 0 |
| 14 | 0.56525  | E | 1 |
| 5  | 0.104296 | C | 1 |
| 7  | 0.42267  | C | 1 |
| 6  | 0.09284  | C | 1 |
| 7  | 0.522116 | C | 1 |
| 6  | 0.586155 | N | 0 |
| 8  | 0.445596 | I | 0 |
| 8  | 0.445596 | I | 0 |
| 9  | 0.503446 | C | 1 |
| 10 | 0.563235 | C | 1 |
| 7  | 0.230729 | C | 1 |
| 24 | 0.774624 | C | 1 |
| 7  | 0.230729 | C | 1 |
| 14 | 0.49213  | C | 1 |
| 3  | 0.118268 | C | 1 |
| 1  | 0.087082 | C | 1 |
| 7  | 0.230729 | C | 1 |
| 6  | 0.601268 | C | 1 |
| 7  | 0.406563 | C | 1 |



|    |          |   |   |
|----|----------|---|---|
| 7  | 0.522116 | C | 1 |
| 2  | 0.590765 | C | 1 |
| 8  | 0.448249 | I | 0 |
| 7  | 0.272123 | C | 1 |
| 7  | 0.230729 | C | 1 |
| 7  | 0.406563 | C | 1 |
| 6  | 0.455516 | C | 1 |
| 21 | 0.69325  | F | 0 |
| 14 | 0.438533 | I | 0 |
| 7  | 0.230729 | C | 1 |
| 5  | 0.104296 | C | 1 |
| 1  | 0.386344 | C | 1 |
| 17 | 0.280398 | R | 0 |
| 14 | 0.49213  | C | 1 |
| 7  | 0.230729 | C | 1 |
| 5  | 0.367306 | I | 0 |
| 8  | 0.445596 | I | 0 |
| 16 | 0.458494 | C | 1 |
| 14 | 0.49213  | C | 1 |
| 7  | 0.112749 | C | 1 |
| 6  | 0.334951 | C | 1 |
| 13 | 0.226451 | C | 1 |
| 9  | 0.480939 | C | 1 |
| 1  | 0.262508 | C | 1 |
| 1  | 0.262508 | C | 1 |
| 24 | 0.709999 | F | 0 |
| 24 | 0.709999 | F | 0 |
| 7  | 0.374684 | D | 1 |
| 5  | 0.104296 | C | 1 |
| 6  | 0.09284  | C | 1 |
| 8  | 0.535273 | C | 1 |
| 13 | 0.480685 | L | 0 |
| 2  | 0.415714 | C | 1 |
| 13 | 0.480685 | L | 0 |
| 9  | 0.214214 | I | 0 |
| 6  | 0.455516 | C | 1 |
| 7  | 0.272123 | C | 1 |
| 6  | 0.09284  | C | 1 |
| 7  | 0.112749 | C | 1 |
| 13 | 0.226451 | C | 1 |
| 7  | 0.197784 | I | 0 |
| 13 | 0.480685 | L | 0 |
| 24 | 0.709999 | F | 0 |
| 1  | 0.262508 | C | 1 |
| 6  | 0.09284  | C | 1 |
| 7  | 0.406563 | C | 1 |
| 3  | 0.193995 | C | 1 |
| 13 | 0.480685 | L | 0 |
| 13 | 0.480685 | L | 0 |
| 7  | 0.42267  | C | 1 |
| 7  | 0.585103 | C | 1 |
| 13 | 0.480685 | L | 0 |
| 7  | 0.585103 | C | 1 |
| 7  | 0.585103 | C | 1 |

|    |          |   |   |
|----|----------|---|---|
| 13 | 0.179841 | C | 1 |
| 6  | 0.57168  | C | 1 |
| 7  | 0.197784 | I | 0 |
| 13 | 0.179841 | C | 1 |
| 6  | 0.334951 | C | 1 |
| 7  | 0.112749 | C | 1 |
| 13 | 0.179841 | C | 1 |
| 8  | 0.433951 | C | 1 |
| 7  | 0.548074 | C | 1 |
| 1  | 0.386344 | C | 1 |
| 23 | 0.532298 | C | 1 |
| 10 | 0.529779 | C | 1 |
| 21 | 0.69325  | F | 0 |
| 20 | 0.28326  | I | 0 |
| 7  | 0.374684 | D | 1 |
| 6  | 0.586155 | N | 0 |
| 1  | 0.371391 | C | 1 |
| 1  | 0.274455 | C | 1 |
| 8  | 0.445596 | I | 0 |
| 13 | 0.480685 | L | 0 |
| 14 | 0.099193 | R | 0 |
| 7  | 0.272123 | C | 1 |
| 21 | 0.69325  | F | 0 |
| 7  | 0.441192 | R | 0 |
| 7  | 0.112749 | C | 1 |
| 8  | 0.445596 | I | 0 |
| 24 | 0.123523 | I | 0 |
| 14 | 0.438533 | I | 0 |
| 7  | 0.406563 | C | 1 |
| 3  | 0.118268 | C | 1 |
| 2  | 0.14772  | C | 1 |
| 7  | 0.406563 | C | 1 |
| 1  | 0.386344 | C | 1 |
| 7  | 0.406563 | C | 1 |
| 7  | 0.197784 | I | 0 |
| 7  | 0.272123 | C | 1 |
| 14 | 0.56525  | E | 1 |
| 2  | 0.590765 | C | 1 |
| 7  | 0.748514 | C | 1 |
| 7  | 0.748514 | C | 1 |
| 7  | 0.748514 | C | 1 |
| 7  | 0.272123 | C | 1 |
| 7  | 0.42267  | C | 1 |
| 7  | 0.272123 | C | 1 |
| 7  | 0.272123 | C | 1 |
| 15 | 0.256547 | I | 0 |
| 8  | 0.433951 | C | 1 |
| 2  | 0.590765 | C | 1 |
| 20 | 0.28326  | I | 0 |
| 1  | 0.262508 | C | 1 |
| 6  | 0.62758  | C | 1 |
| 3  | 0.118268 | C | 1 |
| 3  | 0.118268 | C | 1 |
| 15 | 0.256547 | I | 0 |

|    |          |   |   |
|----|----------|---|---|
| 13 | 0.226451 | C | 1 |
| 1  | 0.262508 | C | 1 |
| 16 | 0.458494 | C | 1 |
| 8  | 0.445596 | I | 0 |
| 7  | 0.548074 | C | 1 |
| 7  | 0.42267  | C | 1 |
| 5  | 0.104296 | C | 1 |
| 19 | 0.315513 | C | 1 |
| 16 | 0.458494 | C | 1 |
| 13 | 0.226451 | C | 1 |
| 6  | 0.62758  | C | 1 |
| 9  | 0.302099 | C | 1 |
| 9  | 0.503446 | C | 1 |
| 13 | 0.226451 | C | 1 |
| 8  | 0.433951 | C | 1 |
| 21 | 0.187781 | C | 1 |
| 6  | 0.601268 | C | 1 |
| 6  | 0.389478 | C | 1 |
| 18 | 0.601057 | C | 1 |
| 6  | 0.601226 | Q | 0 |
| 16 | 0.458494 | C | 1 |
| 21 | 0.373694 | R | 0 |
| 16 | 0.458494 | C | 1 |
| 19 | 0.315513 | C | 1 |
| 21 | 0.69325  | F | 0 |
| 7  | 0.548074 | C | 1 |
| 1  | 0.371391 | C | 1 |
| 7  | 0.548074 | C | 1 |
| 7  | 0.548074 | C | 1 |
| 7  | 0.548074 | C | 1 |
| 6  | 0.09284  | C | 1 |
| 7  | 0.548074 | C | 1 |
| 18 | 0.747388 | F | 0 |
| 6  | 0.455516 | C | 1 |
| 7  | 0.548074 | C | 1 |
| 7  | 0.548074 | C | 1 |
| 7  | 0.112749 | C | 1 |
| 20 | 0.28326  | I | 0 |
| 7  | 0.522116 | C | 1 |
| 7  | 0.434132 | C | 1 |
| 6  | 0.57168  | C | 1 |
| 7  | 0.548074 | C | 1 |
| 9  | 0.214214 | I | 0 |
| 6  | 0.62758  | C | 1 |
| 24 | 0.774624 | C | 1 |
| 7  | 0.112749 | C | 1 |
| 7  | 0.374684 | D | 1 |
| 23 | 0.532298 | C | 1 |
| 21 | 0.187781 | C | 1 |
| 1  | 0.533317 | I | 0 |
| 7  | 0.336732 | C | 1 |
| 7  | 0.434132 | C | 1 |
| 7  | 0.748514 | C | 1 |
| 7  | 0.230729 | C | 1 |

|    |          |   |   |
|----|----------|---|---|
| 23 | 0.532298 | C | 1 |
| 20 | 0.28326  | I | 0 |
| 2  | 0.415714 | C | 1 |
| 23 | 0.532298 | C | 1 |
| 6  | 0.601226 | Q | 0 |
| 5  | 0.104296 | C | 1 |
| 13 | 0.480685 | L | 0 |
| 7  | 0.197784 | I | 0 |
| 15 | 0.256547 | I | 0 |
| 2  | 0.14772  | C | 1 |
| 6  | 0.09284  | C | 1 |
| 13 | 0.226451 | C | 1 |
| 6  | 0.601268 | C | 1 |
| 7  | 0.548074 | C | 1 |
| 2  | 0.415714 | C | 1 |
| 7  | 0.374684 | D | 1 |
| 14 | 0.56525  | E | 1 |
| 2  | 0.155071 | C | 1 |
| 7  | 0.230729 | C | 1 |
| 21 | 0.187781 | C | 1 |
| 6  | 0.601226 | Q | 0 |
| 6  | 0.57168  | C | 1 |
| 13 | 0.179841 | C | 1 |
| 13 | 0.226451 | C | 1 |
| 18 | 0.681074 | S | 0 |
| 2  | 0.590765 | C | 1 |
| 14 | 0.49213  | C | 1 |
| 2  | 0.110476 | C | 1 |
| 2  | 0.110476 | C | 1 |
| 9  | 0.214214 | I | 0 |
| 20 | 0.28326  | I | 0 |
| 7  | 0.406563 | C | 1 |
| 6  | 0.334951 | C | 1 |
| 7  | 0.230729 | C | 1 |
| 13 | 0.226451 | C | 1 |
| 7  | 0.272123 | C | 1 |
| 6  | 0.601268 | C | 1 |
| 6  | 0.601268 | C | 1 |
| 2  | 0.110476 | C | 1 |
| 23 | 0.532298 | C | 1 |
| 6  | 0.455516 | C | 1 |
| 2  | 0.110476 | C | 1 |
| 7  | 0.541837 | C | 1 |
| 7  | 0.522116 | C | 1 |
| 21 | 0.373694 | R | 0 |
| 6  | 0.601268 | C | 1 |
| 14 | 0.438533 | I | 0 |
| 14 | 0.438533 | I | 0 |
| 14 | 0.438533 | I | 0 |
| 7  | 0.406563 | C | 1 |
| 1  | 0.386344 | C | 1 |
| 8  | 0.535273 | C | 1 |
| 7  | 0.541837 | C | 1 |
| 13 | 0.480685 | L | 0 |

|    |          |   |   |
|----|----------|---|---|
| 14 | 0.438533 | I | 0 |
| 15 | 0.256547 | I | 0 |
| 6  | 0.57168  | C | 1 |
| 6  | 0.601226 | Q | 0 |
| 7  | 0.406563 | C | 1 |
| 24 | 0.774624 | C | 1 |
| 24 | 0.709999 | F | 0 |
| 13 | 0.179841 | C | 1 |
| 6  | 0.586155 | N | 0 |
| 6  | 0.57168  | C | 1 |
| 18 | 0.681074 | S | 0 |
| 2  | 0.590765 | C | 1 |
| 9  | 0.503446 | C | 1 |
| 6  | 0.57168  | C | 1 |
| 6  | 0.62758  | C | 1 |
| 5  | 0.213268 | Q | 0 |
| 19 | 0.315513 | C | 1 |
| 7  | 0.548074 | C | 1 |
| 17 | 0.449002 | F | 0 |
| 7  | 0.112749 | C | 1 |
| 14 | 0.099193 | R | 0 |
| 7  | 0.374684 | D | 1 |
| 7  | 0.522116 | C | 1 |
| 6  | 0.57168  | C | 1 |
| 2  | 0.589158 | C | 1 |
| 14 | 0.438533 | I | 0 |
| 1  | 0.262508 | C | 1 |
| 1  | 0.087082 | C | 1 |
| 9  | 0.480939 | C | 1 |
| 7  | 0.434132 | C | 1 |
| 6  | 0.334951 | C | 1 |
| 7  | 0.434132 | C | 1 |
| 8  | 0.448249 | I | 0 |
| 18 | 0.681074 | S | 0 |
| 13 | 0.480685 | L | 0 |
| 9  | 0.480939 | C | 1 |
| 21 | 0.187781 | C | 1 |
| 24 | 0.123523 | I | 0 |
| 13 | 0.226451 | C | 1 |
| 9  | 0.214214 | I | 0 |
| 1  | 0.257455 | I | 0 |
| 23 | 0.532298 | C | 1 |
| 9  | 0.214214 | I | 0 |
| 17 | 0.449002 | F | 0 |
| 8  | 0.535273 | C | 1 |
| 23 | 0.532298 | C | 1 |
| 9  | 0.503446 | C | 1 |
| 6  | 0.334951 | C | 1 |
| 1  | 0.154843 | I | 0 |
| 9  | 0.503446 | C | 1 |
| 13 | 0.226451 | C | 1 |
| 3  | 0.118268 | C | 1 |
| 10 | 0.563235 | C | 1 |
| 19 | 0.315513 | C | 1 |

|    |          |   |   |
|----|----------|---|---|
| 8  | 0.535273 | C | 1 |
| 6  | 0.601268 | C | 1 |
| 10 | 0.529779 | C | 1 |
| 1  | 0.262508 | C | 1 |
| 18 | 0.601057 | C | 1 |
| 6  | 0.601226 | Q | 0 |
| 9  | 0.302099 | C | 1 |
| 7  | 0.522116 | C | 1 |
| 13 | 0.226451 | C | 1 |
| 1  | 0.386344 | C | 1 |
| 13 | 0.480685 | L | 0 |
| 14 | 0.438533 | I | 0 |
| 6  | 0.089364 | I | 0 |
| 10 | 0.611543 | E | 1 |
| 7  | 0.434132 | C | 1 |
| 7  | 0.585103 | C | 1 |
| 6  | 0.089364 | I | 0 |
| 7  | 0.336732 | C | 1 |
| 15 | 0.256547 | I | 0 |
| 3  | 0.118268 | C | 1 |
| 3  | 0.118268 | C | 1 |
| 9  | 0.503446 | C | 1 |
| 7  | 0.406563 | C | 1 |
| 7  | 0.548074 | C | 1 |
| 6  | 0.089364 | I | 0 |
| 1  | 0.262508 | C | 1 |
| 8  | 0.445596 | I | 0 |
| 6  | 0.62758  | C | 1 |
| 8  | 0.535273 | C | 1 |
| 8  | 0.433951 | C | 1 |
| 14 | 0.49213  | C | 1 |
| 6  | 0.601226 | Q | 0 |
| 1  | 0.262508 | C | 1 |
| 8  | 0.445596 | I | 0 |
| 17 | 0.449002 | F | 0 |
| 6  | 0.455516 | C | 1 |
| 3  | 0.193995 | C | 1 |
| 1  | 0.386344 | C | 1 |
| 10 | 0.611543 | E | 1 |
| 6  | 0.57168  | C | 1 |
| 7  | 0.112749 | C | 1 |
| 5  | 0.367306 | I | 0 |
| 16 | 0.458494 | C | 1 |
| 21 | 0.69325  | F | 0 |
| 9  | 0.480939 | C | 1 |
| 18 | 0.681074 | S | 0 |
| 3  | 0.193995 | C | 1 |
| 5  | 0.104296 | C | 1 |
| 2  | 0.590765 | C | 1 |
| 7  | 0.230729 | C | 1 |
| 1  | 0.315621 | C | 1 |
| 24 | 0.774624 | C | 1 |
| 9  | 0.480939 | C | 1 |
| 2  | 0.590765 | C | 1 |

|    |          |   |   |
|----|----------|---|---|
| 24 | 0.709999 | F | 0 |
| 16 | 0.458494 | C | 1 |
| 8  | 0.433951 | C | 1 |
| 19 | 0.315513 | C | 1 |
| 1  | 0.257455 | I | 0 |
| 17 | 0.280398 | R | 0 |
| 8  | 0.535273 | C | 1 |
| 7  | 0.230729 | C | 1 |
| 7  | 0.272123 | C | 1 |
| 9  | 0.503446 | C | 1 |
| 2  | 0.155071 | C | 1 |
| 17 | 0.449002 | F | 0 |
| 16 | 0.458494 | C | 1 |
| 10 | 0.529779 | C | 1 |
| 14 | 0.49213  | C | 1 |
| 19 | 0.315513 | C | 1 |
| 1  | 0.371391 | C | 1 |
| 8  | 0.445596 | I | 0 |
| 7  | 0.585103 | C | 1 |
| 8  | 0.535273 | C | 1 |
| 19 | 0.315513 | C | 1 |
| 8  | 0.734056 | I | 0 |
| 21 | 0.187781 | C | 1 |
| 24 | 0.123523 | I | 0 |
| 1  | 0.087082 | C | 1 |
| 6  | 0.455516 | C | 1 |
| 6  | 0.089364 | I | 0 |
| 6  | 0.089364 | I | 0 |
| 8  | 0.445596 | I | 0 |
| 6  | 0.09284  | C | 1 |
| 2  | 0.110476 | C | 1 |
| 1  | 0.332968 | C | 1 |
| 13 | 0.226451 | C | 1 |
| 13 | 0.179841 | C | 1 |
| 24 | 0.709999 | F | 0 |
| 6  | 0.389478 | C | 1 |
| 1  | 0.332968 | C | 1 |
| 6  | 0.586155 | N | 0 |
| 24 | 0.709999 | F | 0 |
| 20 | 0.28326  | I | 0 |
| 1  | 0.371391 | C | 1 |
| 14 | 0.438533 | I | 0 |
| 5  | 0.213268 | Q | 0 |
| 1  | 0.371391 | C | 1 |
| 13 | 0.480685 | L | 0 |
| 2  | 0.589158 | C | 1 |
| 14 | 0.56525  | E | 1 |
| 5  | 0.104296 | C | 1 |
| 7  | 0.230729 | C | 1 |
| 6  | 0.089364 | I | 0 |
| 2  | 0.155071 | C | 1 |
| 21 | 0.187781 | C | 1 |
| 5  | 0.367306 | I | 0 |
| 18 | 0.747388 | F | 0 |

|    |          |   |   |
|----|----------|---|---|
| 1  | 0.154843 | I | 0 |
| 7  | 0.230729 | C | 1 |
| 8  | 0.448249 | I | 0 |
| 8  | 0.445596 | I | 0 |
| 13 | 0.480685 | L | 0 |
| 6  | 0.586155 | N | 0 |
| 9  | 0.503446 | C | 1 |
| 18 | 0.601057 | C | 1 |
| 10 | 0.529779 | C | 1 |
| 24 | 0.774624 | C | 1 |
| 6  | 0.601226 | Q | 0 |
| 1  | 0.332968 | C | 1 |
| 1  | 0.143578 | C | 1 |
| 7  | 0.748514 | C | 1 |
| 7  | 0.541837 | C | 1 |
| 7  | 0.272123 | C | 1 |
| 6  | 0.586155 | N | 0 |
| 2  | 0.589158 | C | 1 |
| 7  | 0.434132 | C | 1 |
| 17 | 0.280398 | R | 0 |
| 7  | 0.197784 | I | 0 |
| 6  | 0.586155 | N | 0 |
| 1  | 0.533317 | I | 0 |
| 6  | 0.586155 | N | 0 |
| 3  | 0.193995 | C | 1 |
| 7  | 0.548074 | C | 1 |
| 16 | 0.458494 | C | 1 |
| 8  | 0.448249 | I | 0 |
| 24 | 0.123523 | I | 0 |
| 7  | 0.272123 | C | 1 |
| 1  | 0.262508 | C | 1 |
| 7  | 0.272123 | C | 1 |
| 7  | 0.230729 | C | 1 |
| 17 | 0.449002 | F | 0 |
| 18 | 0.601057 | C | 1 |
| 2  | 0.590765 | C | 1 |
| 23 | 0.532298 | C | 1 |
| 5  | 0.367306 | I | 0 |
| 8  | 0.433951 | C | 1 |
| 7  | 0.522116 | C | 1 |
| 14 | 0.49213  | C | 1 |
| 13 | 0.480685 | L | 0 |
| 1  | 0.274455 | C | 1 |
| 9  | 0.503446 | C | 1 |
| 13 | 0.226451 | C | 1 |
| 23 | 0.532298 | C | 1 |
| 7  | 0.434132 | C | 1 |
| 8  | 0.734056 | I | 0 |
| 7  | 0.522116 | C | 1 |
| 7  | 0.336732 | C | 1 |
| 7  | 0.230729 | C | 1 |
| 13 | 0.480685 | L | 0 |
| 8  | 0.734056 | I | 0 |
| 7  | 0.434132 | C | 1 |



|    |          |   |   |
|----|----------|---|---|
| 9  | 0.302099 | C | 1 |
| 14 | 0.438533 | I | 0 |
| 2  | 0.110476 | C | 1 |
| 7  | 0.522116 | C | 1 |
| 8  | 0.535273 | C | 1 |
| 8  | 0.433951 | C | 1 |
| 13 | 0.480685 | L | 0 |
| 17 | 0.280398 | R | 0 |
| 23 | 0.532298 | C | 1 |
| 1  | 0.274455 | C | 1 |
| 9  | 0.214214 | I | 0 |
| 1  | 0.315621 | C | 1 |
| 1  | 0.143578 | C | 1 |
| 7  | 0.230729 | C | 1 |
| 6  | 0.334951 | C | 1 |
| 7  | 0.374684 | D | 1 |
| 7  | 0.197784 | I | 0 |
| 14 | 0.56525  | E | 1 |
| 1  | 0.315621 | C | 1 |
| 2  | 0.590765 | C | 1 |
| 8  | 0.535273 | C | 1 |
| 23 | 0.532298 | C | 1 |
| 16 | 0.458494 | C | 1 |
| 2  | 0.590765 | C | 1 |
| 2  | 0.590765 | C | 1 |
| 17 | 0.449002 | F | 0 |
| 24 | 0.709999 | F | 0 |
| 23 | 0.532298 | C | 1 |
| 23 | 0.532298 | C | 1 |
| 17 | 0.280398 | R | 0 |
| 24 | 0.123523 | I | 0 |
| 7  | 0.272123 | C | 1 |
| 10 | 0.563235 | C | 1 |
| 24 | 0.709999 | F | 0 |
| 1  | 0.332968 | C | 1 |
| 14 | 0.49213  | C | 1 |
| 7  | 0.748514 | C | 1 |
| 7  | 0.522116 | C | 1 |
| 5  | 0.367306 | I | 0 |
| 5  | 0.104296 | C | 1 |
| 13 | 0.480685 | L | 0 |
| 7  | 0.374684 | D | 1 |
| 2  | 0.14772  | C | 1 |
| 5  | 0.104296 | C | 1 |
| 8  | 0.247445 | I | 0 |
| 7  | 0.541837 | C | 1 |
| 23 | 0.532298 | C | 1 |
| 5  | 0.213268 | Q | 0 |
| 15 | 0.256547 | I | 0 |
| 1  | 0.332968 | C | 1 |
| 5  | 0.367306 | I | 0 |
| 23 | 0.532298 | C | 1 |
| 18 | 0.681074 | S | 0 |
| 9  | 0.480939 | C | 1 |

|    |          |   |   |
|----|----------|---|---|
| 7  | 0.197784 | I | 0 |
| 6  | 0.57168  | C | 1 |
| 10 | 0.563235 | C | 1 |
| 6  | 0.455516 | C | 1 |
| 20 | 0.28326  | I | 0 |
| 1  | 0.533317 | I | 0 |
| 13 | 0.480685 | L | 0 |
| 21 | 0.373694 | R | 0 |
| 6  | 0.09284  | C | 1 |
| 7  | 0.406563 | C | 1 |
| 2  | 0.14772  | C | 1 |
| 2  | 0.415714 | C | 1 |
| 14 | 0.099193 | R | 0 |
| 6  | 0.455516 | C | 1 |
| 10 | 0.611543 | E | 1 |
| 7  | 0.406563 | C | 1 |
| 6  | 0.57168  | C | 1 |
| 6  | 0.586155 | N | 0 |
| 7  | 0.230729 | C | 1 |
| 20 | 0.28326  | I | 0 |
| 20 | 0.28326  | I | 0 |
| 17 | 0.280398 | R | 0 |
| 10 | 0.611543 | E | 1 |
| 15 | 0.256547 | I | 0 |
| 7  | 0.585103 | C | 1 |
| 7  | 0.145854 | R | 0 |
| 21 | 0.387428 | Q | 0 |
| 6  | 0.62758  | C | 1 |
| 13 | 0.179841 | C | 1 |
| 24 | 0.123523 | I | 0 |
| 1  | 0.274455 | C | 1 |
| 6  | 0.455516 | C | 1 |
| 3  | 0.193995 | C | 1 |
| 2  | 0.590765 | C | 1 |
| 9  | 0.214214 | I | 0 |
| 6  | 0.09284  | C | 1 |
| 6  | 0.601268 | C | 1 |
| 1  | 0.262508 | C | 1 |
| 6  | 0.089364 | I | 0 |
| 8  | 0.445596 | I | 0 |
| 2  | 0.110476 | C | 1 |
| 13 | 0.226451 | C | 1 |
| 6  | 0.586155 | N | 0 |
| 6  | 0.62758  | C | 1 |
| 2  | 0.110476 | C | 1 |
| 1  | 0.332968 | C | 1 |
| 1  | 0.154843 | I | 0 |
| 1  | 0.386344 | C | 1 |
| 2  | 0.110476 | C | 1 |
| 16 | 0.458494 | C | 1 |
| 7  | 0.406563 | C | 1 |
| 6  | 0.601226 | Q | 0 |
| 6  | 0.57168  | C | 1 |
| 2  | 0.415714 | C | 1 |



|    |          |   |   |
|----|----------|---|---|
| 15 | 0.649968 | C | 1 |
| 6  | 0.443419 | C | 1 |
| 6  | 0.349967 | C | 1 |
| 6  | 0.443419 | C | 1 |
| 15 | 0.649968 | C | 1 |
| 6  | 0.443419 | C | 1 |
| 7  | 0.356493 | C | 1 |
| 6  | 0.443419 | C | 1 |
| 6  | 0.349967 | C | 1 |
| 6  | 0.443419 | C | 1 |
| 15 | 0.649968 | C | 1 |
| 7  | 0.356493 | C | 1 |
| 6  | 0.443419 | C | 1 |
| 13 | 0.318148 | C | 1 |
| 6  | 0.443419 | C | 1 |
| 15 | 0.649968 | C | 1 |
| 13 | 0.318148 | C | 1 |
| 6  | 0.349967 | C | 1 |
| 6  | 0.443419 | C | 1 |
| 7  | 0.356493 | C | 1 |
| 7  | 0.356493 | C | 1 |
| 13 | 0.318148 | C | 1 |
| 15 | 0.649968 | C | 1 |
| 13 | 0.318148 | C | 1 |
| 13 | 0.318148 | C | 1 |
| 6  | 0.349967 | C | 1 |
| 7  | 0.356493 | C | 1 |
| 6  | 0.349967 | C | 1 |
| 15 | 0.649968 | C | 1 |
| 13 | 0.318148 | C | 1 |
| 13 | 0.318148 | C | 1 |
| 6  | 0.349967 | C | 1 |
| 15 | 0.649968 | C | 1 |
| 6  | 0.349967 | C | 1 |
| 6  | 0.349967 | C | 1 |
| 6  | 0.349967 | C | 1 |
| 15 | 0.649968 | C | 1 |
| 7  | 0.356493 | C | 1 |
| 7  | 0.356493 | C | 1 |
| 15 | 0.649968 | C | 1 |
| 7  | 0.356493 | C | 1 |
| 13 | 0.318148 | C | 1 |
| 6  | 0.349967 | C | 1 |
| 13 | 0.318148 | C | 1 |
| 6  | 0.443419 | C | 1 |
| 15 | 0.649968 | C | 1 |
| 3  | 0.332779 | C | 1 |
| 10 | 0.469745 | I | 0 |
| 10 | 0.469745 | I | 0 |
| 8  | 0.178245 | C | 1 |
| 8  | 0.178245 | C | 1 |
| 10 | 0.469745 | I | 0 |
| 10 | 0.469745 | I | 0 |
| 8  | 0.178245 | C | 1 |

|    |          |   |   |
|----|----------|---|---|
| 3  | 0.332779 | C | 1 |
| 10 | 0.637198 | C | 1 |
| 8  | 0.178245 | C | 1 |
| 10 | 0.637198 | C | 1 |
| 3  | 0.332779 | C | 1 |
| 8  | 0.178245 | C | 1 |
| 8  | 0.178245 | C | 1 |
| 8  | 0.178245 | C | 1 |
| 8  | 0.178245 | C | 1 |
| 10 | 0.469745 | I | 0 |
| 10 | 0.469745 | I | 0 |
| 3  | 0.332779 | C | 1 |
| 3  | 0.332779 | C | 1 |
| 3  | 0.332779 | C | 1 |
| 3  | 0.332779 | C | 1 |
| 8  | 0.178245 | C | 1 |
| 10 | 0.637198 | C | 1 |
| 3  | 0.332779 | C | 1 |
| 2  | 0.58134  | C | 1 |
| 2  | 0.58134  | C | 1 |
| 2  | 0.58134  | C | 1 |
| 2  | 0.58134  | C | 1 |
| 8  | 0.444686 | C | 1 |
| 8  | 0.444686 | C | 1 |
| 2  | 0.58134  | C | 1 |
| 8  | 0.444686 | C | 1 |
| 2  | 0.58134  | C | 1 |
| 8  | 0.444686 | C | 1 |
| 8  | 0.444686 | C | 1 |
| 8  | 0.444686 | C | 1 |
| 8  | 0.444686 | C | 1 |
| 8  | 0.444686 | C | 1 |
| 17 | 0.184579 | C | 1 |
| 17 | 0.184579 | C | 1 |
| 17 | 0.184579 | C | 1 |
| 17 | 0.184579 | C | 1 |
| 16 | 0.645511 | C | 1 |
| 8  | 0.386007 | C | 1 |
| 5  | 0.603633 | C | 1 |
| 19 | 0.728646 | C | 1 |
| 10 | 0.266325 | C | 1 |
| 16 | 0.645511 | C | 1 |
| 17 | 0.379837 | C | 1 |
| 17 | 0.379837 | C | 1 |
| 22 | 0.481574 | C | 1 |
| 21 | 0.309942 | C | 1 |
| 1  | 0.321945 | C | 1 |
| 17 | 0.379837 | C | 1 |
| 6  | 0.287174 | C | 1 |
| 8  | 0.386007 | C | 1 |
| 6  | 0.339964 | C | 1 |
| 19 | 0.728646 | C | 1 |
| 22 | 0.481574 | C | 1 |
| 20 | 0.53097  | C | 1 |

|    |          |   |   |
|----|----------|---|---|
| 15 | 0.329817 | C | 1 |
| 20 | 0.53097  | C | 1 |
| 20 | 0.726651 | E | 1 |
| 21 | 0.352956 | R | 0 |
| 5  | 0.603633 | C | 1 |
| 20 | 0.53097  | C | 1 |
| 13 | 0.433299 | G | 0 |
| 19 | 0.812715 | E | 1 |
| 1  | 0.461522 | E | 1 |
| 7  | 0.255736 | K | 1 |
| 22 | 0.481574 | C | 1 |
| 20 | 0.53097  | C | 1 |
| 20 | 0.53097  | C | 1 |
| 19 | 0.728646 | C | 1 |
| 17 | 0.090146 | C | 1 |
| 20 | 0.53097  | C | 1 |
| 20 | 0.726651 | E | 1 |
| 7  | 0.624627 | F | 0 |
| 17 | 0.379837 | C | 1 |
| 10 | 0.266325 | C | 1 |
| 1  | 0.089073 | C | 1 |
| 7  | 0.069763 | C | 1 |
| 7  | 0.624627 | F | 0 |
| 20 | 0.726651 | E | 1 |
| 13 | 0.424451 | F | 0 |
| 21 | 0.309942 | C | 1 |
| 6  | 0.287174 | C | 1 |
| 5  | 0.603633 | C | 1 |
| 5  | 0.603633 | C | 1 |
| 21 | 0.309942 | C | 1 |
| 6  | 0.339964 | C | 1 |
| 13 | 0.175379 | F | 0 |
| 1  | 0.089073 | C | 1 |
| 15 | 0.329817 | C | 1 |
| 8  | 0.102017 | C | 1 |
| 13 | 0.175379 | F | 0 |
| 6  | 0.287174 | C | 1 |
| 22 | 0.481574 | C | 1 |
| 1  | 0.321945 | C | 1 |
| 16 | 0.645511 | C | 1 |
| 17 | 0.379837 | C | 1 |
| 16 | 0.645511 | C | 1 |
| 5  | 0.603633 | C | 1 |
| 16 | 0.645511 | C | 1 |
| 20 | 0.726651 | E | 1 |
| 21 | 0.309942 | C | 1 |
| 10 | 0.266325 | C | 1 |
| 21 | 0.309942 | C | 1 |
| 7  | 0.200234 | C | 1 |
| 16 | 0.645511 | C | 1 |
| 17 | 0.379837 | C | 1 |
| 13 | 0.424451 | F | 0 |
| 7  | 0.624627 | F | 0 |
| 7  | 0.200234 | C | 1 |

|    |          |   |   |
|----|----------|---|---|
| 21 | 0.352956 | R | 0 |
| 21 | 0.309942 | C | 1 |
| 8  | 0.102017 | C | 1 |
| 7  | 0.624627 | F | 0 |
| 18 | 0.723594 | D | 1 |
| 21 | 0.309942 | C | 1 |
| 21 | 0.309942 | C | 1 |
| 20 | 0.53097  | C | 1 |
| 7  | 0.069763 | C | 1 |
| 20 | 0.726651 | E | 1 |
| 17 | 0.379837 | C | 1 |
| 16 | 0.645511 | C | 1 |
| 13 | 0.175379 | F | 0 |
| 6  | 0.31385  | F | 0 |
| 7  | 0.624627 | F | 0 |
| 17 | 0.379837 | C | 1 |
| 20 | 0.53097  | C | 1 |
| 7  | 0.255736 | K | 1 |
| 18 | 0.723594 | D | 1 |
| 1  | 0.461522 | E | 1 |
| 13 | 0.424451 | F | 0 |
| 16 | 0.645511 | C | 1 |
| 17 | 0.379837 | C | 1 |
| 15 | 0.329817 | C | 1 |
| 16 | 0.645511 | C | 1 |
| 22 | 0.481574 | C | 1 |
| 21 | 0.309942 | C | 1 |
| 17 | 0.379837 | C | 1 |
| 8  | 0.102017 | C | 1 |
| 13 | 0.433299 | G | 0 |
| 22 | 0.481574 | C | 1 |
| 13 | 0.424451 | F | 0 |
| 1  | 0.1642   | C | 1 |
| 17 | 0.090146 | C | 1 |
| 6  | 0.287174 | C | 1 |
| 1  | 0.461522 | E | 1 |
| 20 | 0.53097  | C | 1 |
| 20 | 0.53097  | C | 1 |
| 20 | 0.53097  | C | 1 |
| 7  | 0.624627 | F | 0 |
| 5  | 0.603633 | C | 1 |
| 22 | 0.481574 | C | 1 |
| 15 | 0.329817 | C | 1 |
| 7  | 0.624627 | F | 0 |
| 15 | 0.329817 | C | 1 |
| 20 | 0.726651 | E | 1 |
| 7  | 0.069763 | C | 1 |
| 6  | 0.31385  | F | 0 |
| 17 | 0.090146 | C | 1 |
| 7  | 0.200234 | C | 1 |
| 21 | 0.309942 | C | 1 |
| 20 | 0.53097  | C | 1 |
| 16 | 0.645511 | C | 1 |
| 6  | 0.287174 | C | 1 |

|    |          |   |   |
|----|----------|---|---|
| 20 | 0.53097  | C | 1 |
| 1  | 0.321945 | C | 1 |
| 22 | 0.481574 | C | 1 |
| 22 | 0.481574 | C | 1 |
| 7  | 0.624627 | F | 0 |
| 6  | 0.287174 | C | 1 |
| 20 | 0.53097  | C | 1 |
| 21 | 0.309942 | C | 1 |
| 21 | 0.309942 | C | 1 |
| 20 | 0.726651 | E | 1 |
| 22 | 0.481574 | C | 1 |
| 16 | 0.645511 | C | 1 |
| 6  | 0.339964 | C | 1 |
| 17 | 0.379837 | C | 1 |
| 21 | 0.309942 | C | 1 |
| 7  | 0.624627 | F | 0 |
| 15 | 0.329817 | C | 1 |
| 19 | 0.812715 | E | 1 |
| 7  | 0.624627 | F | 0 |
| 1  | 0.089073 | C | 1 |
| 20 | 0.53097  | C | 1 |
| 16 | 0.645511 | C | 1 |
| 20 | 0.53097  | C | 1 |
| 8  | 0.102017 | C | 1 |
| 7  | 0.069763 | C | 1 |
| 6  | 0.287174 | C | 1 |
| 7  | 0.200234 | C | 1 |
| 13 | 0.175379 | F | 0 |
| 6  | 0.31385  | F | 0 |
| 6  | 0.31385  | F | 0 |
| 17 | 0.379837 | C | 1 |
| 20 | 0.726651 | E | 1 |
| 19 | 0.812715 | E | 1 |
| 1  | 0.321945 | C | 1 |
| 5  | 0.603633 | C | 1 |
| 7  | 0.200234 | C | 1 |
| 21 | 0.309942 | C | 1 |
| 1  | 0.321945 | C | 1 |
| 13 | 0.424451 | F | 0 |
| 7  | 0.624627 | F | 0 |
| 20 | 0.53097  | C | 1 |
| 21 | 0.352956 | R | 0 |
| 16 | 0.645511 | C | 1 |
| 17 | 0.379837 | C | 1 |
| 20 | 0.763438 | G | 0 |
| 19 | 0.728646 | C | 1 |
| 17 | 0.379837 | C | 1 |
| 17 | 0.379837 | C | 1 |
| 21 | 0.309942 | C | 1 |
| 17 | 0.379837 | C | 1 |
| 13 | 0.175379 | F | 0 |
| 1  | 0.370189 | C | 1 |
| 16 | 0.645511 | C | 1 |
| 21 | 0.352956 | R | 0 |



|    |          |   |   |
|----|----------|---|---|
| 19 | 0.812715 | E | 1 |
| 6  | 0.287174 | C | 1 |
| 10 | 0.266325 | C | 1 |
| 20 | 0.53097  | C | 1 |
| 1  | 0.1642   | C | 1 |
| 8  | 0.386007 | C | 1 |
| 17 | 0.090146 | C | 1 |
| 7  | 0.255736 | K | 1 |
| 20 | 0.53097  | C | 1 |
| 20 | 0.53097  | C | 1 |
| 1  | 0.089073 | C | 1 |
| 6  | 0.339964 | C | 1 |
| 20 | 0.726651 | E | 1 |
| 21 | 0.352956 | R | 0 |
| 16 | 0.645511 | C | 1 |
| 17 | 0.379837 | C | 1 |
| 19 | 0.812715 | E | 1 |
| 16 | 0.645511 | C | 1 |
| 7  | 0.624627 | F | 0 |
| 17 | 0.090146 | C | 1 |
| 13 | 0.424451 | F | 0 |
| 1  | 0.370189 | C | 1 |
| 7  | 0.069763 | C | 1 |
| 7  | 0.624627 | F | 0 |
| 7  | 0.255736 | K | 1 |
| 13 | 0.175379 | F | 0 |
| 21 | 0.309942 | C | 1 |
| 22 | 0.481574 | C | 1 |
| 8  | 0.102017 | C | 1 |
| 20 | 0.763438 | G | 0 |
| 7  | 0.624627 | F | 0 |
| 22 | 0.481574 | C | 1 |
| 16 | 0.645511 | C | 1 |
| 6  | 0.339964 | C | 1 |
| 18 | 0.723594 | D | 1 |
| 6  | 0.339964 | C | 1 |
| 17 | 0.379837 | C | 1 |
| 7  | 0.624627 | F | 0 |
| 17 | 0.090146 | C | 1 |
| 7  | 0.624627 | F | 0 |
| 20 | 0.53097  | C | 1 |
| 20 | 0.726651 | E | 1 |
| 17 | 0.379837 | C | 1 |
| 7  | 0.624627 | F | 0 |
| 1  | 0.1642   | C | 1 |
| 1  | 0.321945 | C | 1 |
| 17 | 0.090146 | C | 1 |
| 17 | 0.090146 | C | 1 |
| 20 | 0.53097  | C | 1 |
| 1  | 0.1642   | C | 1 |
| 6  | 0.339964 | C | 1 |
| 21 | 0.309942 | C | 1 |
| 20 | 0.726651 | E | 1 |
| 6  | 0.31385  | F | 0 |

|    |          |   |   |
|----|----------|---|---|
| 20 | 0.726651 | E | 1 |
| 8  | 0.386007 | C | 1 |
| 22 | 0.481574 | C | 1 |
| 21 | 0.309942 | C | 1 |
| 20 | 0.53097  | C | 1 |
| 6  | 0.31385  | F | 0 |
| 15 | 0.329817 | C | 1 |
| 1  | 0.1642   | C | 1 |
| 18 | 0.723594 | D | 1 |
| 17 | 0.379837 | C | 1 |
| 7  | 0.255736 | K | 1 |
| 13 | 0.433299 | G | 0 |
| 19 | 0.728646 | C | 1 |
| 20 | 0.726651 | E | 1 |
| 20 | 0.726651 | E | 1 |
| 22 | 0.481574 | C | 1 |
| 19 | 0.812715 | E | 1 |
| 21 | 0.309942 | C | 1 |
| 20 | 0.53097  | C | 1 |
| 1  | 0.321945 | C | 1 |
| 19 | 0.728646 | C | 1 |
| 7  | 0.200234 | C | 1 |
| 17 | 0.379837 | C | 1 |
| 19 | 0.812715 | E | 1 |
| 8  | 0.102017 | C | 1 |
| 20 | 0.726651 | E | 1 |
| 8  | 0.386007 | C | 1 |
| 22 | 0.481574 | C | 1 |
| 20 | 0.53097  | C | 1 |
| 6  | 0.31385  | F | 0 |
| 16 | 0.645511 | C | 1 |
| 18 | 0.723594 | D | 1 |
| 20 | 0.726651 | E | 1 |
| 15 | 0.329817 | C | 1 |
| 7  | 0.069763 | C | 1 |
| 20 | 0.53097  | C | 1 |
| 10 | 0.266325 | C | 1 |
| 21 | 0.309942 | C | 1 |
| 19 | 0.728646 | C | 1 |
| 19 | 0.728646 | C | 1 |
| 1  | 0.1642   | C | 1 |
| 13 | 0.175379 | F | 0 |
| 8  | 0.386007 | C | 1 |
| 20 | 0.763438 | G | 0 |
| 5  | 0.603633 | C | 1 |
| 20 | 0.726651 | E | 1 |
| 7  | 0.624627 | F | 0 |
| 6  | 0.31385  | F | 0 |
| 22 | 0.481574 | C | 1 |
| 7  | 0.069763 | C | 1 |
| 8  | 0.386007 | C | 1 |
| 13 | 0.175379 | F | 0 |
| 6  | 0.31385  | F | 0 |
| 20 | 0.726651 | E | 1 |

|    |          |   |   |
|----|----------|---|---|
| 20 | 0.53097  | C | 1 |
| 7  | 0.624627 | F | 0 |
| 7  | 0.200234 | C | 1 |
| 20 | 0.53097  | C | 1 |
| 15 | 0.329817 | C | 1 |
| 20 | 0.726651 | E | 1 |
| 20 | 0.53097  | C | 1 |
| 19 | 0.728646 | C | 1 |
| 20 | 0.53097  | C | 1 |
| 2  | 0.068284 | I | 0 |
| 20 | 0.726651 | E | 1 |
| 17 | 0.379837 | C | 1 |
| 21 | 0.309942 | C | 1 |
| 20 | 0.53097  | C | 1 |
| 20 | 0.726651 | E | 1 |
| 20 | 0.53097  | C | 1 |
| 8  | 0.102017 | C | 1 |
| 7  | 0.624627 | F | 0 |
| 13 | 0.433299 | G | 0 |
| 20 | 0.53097  | C | 1 |
| 20 | 0.726651 | E | 1 |
| 6  | 0.287174 | C | 1 |
| 8  | 0.102017 | C | 1 |
| 20 | 0.53097  | C | 1 |
| 13 | 0.433299 | G | 0 |
| 8  | 0.102017 | C | 1 |
| 16 | 0.645511 | C | 1 |
| 7  | 0.069763 | C | 1 |
| 20 | 0.53097  | C | 1 |
| 20 | 0.53097  | C | 1 |
| 18 | 0.723594 | D | 1 |
| 7  | 0.069763 | C | 1 |
| 17 | 0.379837 | C | 1 |
| 8  | 0.102017 | C | 1 |
| 7  | 0.255736 | K | 1 |
| 17 | 0.090146 | C | 1 |
| 1  | 0.321945 | C | 1 |
| 22 | 0.481574 | C | 1 |
| 1  | 0.370189 | C | 1 |
| 7  | 0.200234 | C | 1 |
| 18 | 0.723594 | D | 1 |
| 7  | 0.069763 | C | 1 |
| 16 | 0.645511 | C | 1 |
| 6  | 0.287174 | C | 1 |
| 19 | 0.812715 | E | 1 |
| 1  | 0.089073 | C | 1 |
| 19 | 0.812715 | E | 1 |
| 1  | 0.1642   | C | 1 |
| 15 | 0.329817 | C | 1 |
| 19 | 0.728646 | C | 1 |
| 20 | 0.53097  | C | 1 |
| 2  | 0.068284 | I | 0 |
| 20 | 0.53097  | C | 1 |
| 20 | 0.53097  | C | 1 |

|    |          |   |   |
|----|----------|---|---|
| 22 | 0.481574 | C | 1 |
| 16 | 0.645511 | C | 1 |
| 10 | 0.266325 | C | 1 |
| 18 | 0.723594 | D | 1 |
| 16 | 0.645511 | C | 1 |
| 8  | 0.386007 | C | 1 |
| 20 | 0.726651 | E | 1 |
| 17 | 0.090146 | C | 1 |
| 10 | 0.266325 | C | 1 |
| 13 | 0.175379 | F | 0 |
| 13 | 0.424451 | F | 0 |
| 22 | 0.481574 | C | 1 |
| 2  | 0.068284 | I | 0 |
| 11 | 0.4725   | C | 1 |
| 11 | 0.4725   | C | 1 |
| 11 | 0.4725   | C | 1 |
| 11 | 0.4725   | C | 1 |
| 11 | 0.4725   | C | 1 |
| 11 | 0.4725   | C | 1 |
| 11 | 0.4725   | C | 1 |
| 11 | 0.4725   | C | 1 |
| 11 | 0.4725   | C | 1 |
| 11 | 0.4725   | C | 1 |
| 11 | 0.4725   | C | 1 |
| 11 | 0.4725   | C | 1 |
| 11 | 0.4725   | C | 1 |
| 11 | 0.4725   | C | 1 |
| 11 | 0.4725   | C | 1 |
| 11 | 0.4725   | C | 1 |
| 11 | 0.4725   | C | 1 |
| 11 | 0.4725   | C | 1 |
| 7  | 0.291225 | C | 1 |
| 7  | 0.291225 | C | 1 |
| 7  | 0.291225 | C | 1 |
| 7  | 0.291225 | C | 1 |
| 7  | 0.291225 | C | 1 |
| 7  | 0.291225 | C | 1 |
| 7  | 0.291225 | C | 1 |
| 7  | 0.291225 | C | 1 |
| 7  | 0.291225 | C | 1 |
| 2  | 0.103873 | C | 1 |
| 6  | 0.30631  | C | 1 |
| 7  | 0.4196   | C | 1 |
| 8  | 0.412868 | C | 1 |
| 8  | 0.412868 | C | 1 |
| 2  | 0.128993 | C | 1 |
| 5  | 0.288827 | C | 1 |
| 5  | 0.288827 | C | 1 |
| 5  | 0.288827 | C | 1 |
| 7  | 0.4196   | C | 1 |
| 13 | 0.522411 | C | 1 |
| 13 | 0.522411 | C | 1 |
| 7  | 0.562711 | I | 0 |
| 13 | 0.522411 | C | 1 |
| 13 | 0.522411 | C | 1 |
| 6  | 0.22168  | C | 1 |
| 5  | 0.288827 | C | 1 |
| 6  | 0.30631  | C | 1 |

|    |          |   |   |
|----|----------|---|---|
| 13 | 0.522411 | C | 1 |
| 7  | 0.496998 | C | 1 |
| 2  | 0.103873 | C | 1 |
| 2  | 0.103873 | C | 1 |
| 8  | 0.412868 | C | 1 |
| 2  | 0.291771 | C | 1 |
| 8  | 0.412868 | C | 1 |
| 6  | 0.30631  | C | 1 |
| 2  | 0.103873 | C | 1 |
| 7  | 0.496998 | C | 1 |
| 6  | 0.30631  | C | 1 |
| 9  | 0.16523  | C | 1 |
| 7  | 0.4196   | C | 1 |
| 7  | 0.562711 | I | 0 |
| 6  | 0.22168  | C | 1 |
| 8  | 0.412868 | C | 1 |
| 13 | 0.522411 | C | 1 |
| 9  | 0.16523  | C | 1 |
| 9  | 0.16523  | C | 1 |
| 2  | 0.128993 | C | 1 |
| 7  | 0.562711 | I | 0 |
| 7  | 0.496998 | C | 1 |
| 7  | 0.496998 | C | 1 |
| 8  | 0.412868 | C | 1 |
| 8  | 0.412868 | C | 1 |
| 13 | 0.522411 | C | 1 |
| 5  | 0.288827 | C | 1 |
| 8  | 0.412868 | C | 1 |
| 5  | 0.288827 | C | 1 |
| 5  | 0.288827 | C | 1 |
| 7  | 0.272564 | F | 0 |
| 9  | 0.16523  | C | 1 |
| 7  | 0.383593 | C | 1 |
| 8  | 0.412868 | C | 1 |
| 7  | 0.383593 | C | 1 |
| 8  | 0.412868 | C | 1 |
| 20 | 0.312729 | C | 1 |
| 6  | 0.30631  | C | 1 |
| 7  | 0.383593 | C | 1 |
| 7  | 0.272564 | F | 0 |
| 6  | 0.30631  | C | 1 |
| 9  | 0.16523  | C | 1 |
| 13 | 0.522411 | C | 1 |
| 13 | 0.522411 | C | 1 |
| 17 | 0.68845  | Q | 0 |
| 9  | 0.16523  | C | 1 |
| 6  | 0.22168  | C | 1 |
| 6  | 0.22168  | C | 1 |
| 17 | 0.68845  | Q | 0 |
| 8  | 0.412868 | C | 1 |
| 2  | 0.291771 | C | 1 |
| 23 | 0.358626 | C | 1 |
| 6  | 0.30631  | C | 1 |
| 7  | 0.496998 | C | 1 |

|    |          |   |   |
|----|----------|---|---|
| 7  | 0.359137 | C | 1 |
| 6  | 0.30631  | C | 1 |
| 2  | 0.103873 | C | 1 |
| 7  | 0.562711 | I | 0 |
| 8  | 0.412868 | C | 1 |
| 13 | 0.522411 | C | 1 |
| 20 | 0.312729 | C | 1 |
| 8  | 0.412868 | C | 1 |
| 7  | 0.496998 | C | 1 |
| 5  | 0.288827 | C | 1 |
| 8  | 0.412868 | C | 1 |
| 9  | 0.16523  | C | 1 |
| 7  | 0.272564 | F | 0 |
| 5  | 0.288827 | C | 1 |
| 13 | 0.522411 | C | 1 |
| 7  | 0.359137 | C | 1 |
| 7  | 0.272564 | F | 0 |
| 7  | 0.383593 | C | 1 |
| 8  | 0.412868 | C | 1 |
| 13 | 0.522411 | C | 1 |
| 2  | 0.103873 | C | 1 |
| 7  | 0.562711 | I | 0 |
| 7  | 0.562711 | I | 0 |
| 23 | 0.358626 | C | 1 |
| 17 | 0.68845  | Q | 0 |
| 2  | 0.103873 | C | 1 |
| 20 | 0.312729 | C | 1 |
| 7  | 0.383593 | C | 1 |
| 6  | 0.22168  | C | 1 |
| 7  | 0.562711 | I | 0 |
| 23 | 0.358626 | C | 1 |
| 20 | 0.312729 | C | 1 |
| 8  | 0.412868 | C | 1 |
| 7  | 0.4196   | C | 1 |
| 6  | 0.30631  | C | 1 |
| 23 | 0.358626 | C | 1 |
| 17 | 0.68845  | Q | 0 |
| 2  | 0.119567 | C | 1 |
| 8  | 0.412868 | C | 1 |
| 7  | 0.496998 | C | 1 |
| 5  | 0.288827 | C | 1 |
| 8  | 0.412868 | C | 1 |
| 20 | 0.312729 | C | 1 |
| 9  | 0.16523  | C | 1 |
| 7  | 0.496998 | C | 1 |
| 7  | 0.562711 | I | 0 |
| 20 | 0.312729 | C | 1 |
| 23 | 0.358626 | C | 1 |
| 20 | 0.312729 | C | 1 |
| 7  | 0.383593 | C | 1 |
| 2  | 0.103873 | C | 1 |
| 2  | 0.119567 | C | 1 |
| 5  | 0.288827 | C | 1 |
| 2  | 0.291771 | C | 1 |

|    |          |   |   |
|----|----------|---|---|
| 6  | 0.30631  | C | 1 |
| 2  | 0.128993 | C | 1 |
| 13 | 0.522411 | C | 1 |
| 8  | 0.412868 | C | 1 |
| 17 | 0.68845  | Q | 0 |
| 5  | 0.288827 | C | 1 |
| 7  | 0.4196   | C | 1 |
| 6  | 0.30631  | C | 1 |
| 7  | 0.4196   | C | 1 |
| 17 | 0.68845  | Q | 0 |
| 20 | 0.312729 | C | 1 |
| 9  | 0.16523  | C | 1 |
| 7  | 0.359137 | C | 1 |
| 7  | 0.272564 | F | 0 |
| 20 | 0.312729 | C | 1 |
| 20 | 0.312729 | C | 1 |
| 7  | 0.496998 | C | 1 |
| 13 | 0.522411 | C | 1 |
| 2  | 0.291771 | C | 1 |
| 6  | 0.22168  | C | 1 |
| 5  | 0.288827 | C | 1 |
| 5  | 0.288827 | C | 1 |
| 23 | 0.358626 | C | 1 |
| 9  | 0.16523  | C | 1 |
| 7  | 0.496998 | C | 1 |
| 20 | 0.312729 | C | 1 |
| 2  | 0.119567 | C | 1 |
| 5  | 0.288827 | C | 1 |
| 20 | 0.312729 | C | 1 |
| 2  | 0.291771 | C | 1 |
| 2  | 0.291771 | C | 1 |
| 8  | 0.412868 | C | 1 |
| 8  | 0.412868 | C | 1 |
| 3  | 0.500409 | C | 1 |
| 3  | 0.500409 | C | 1 |
| 20 | 0.530245 | C | 1 |
| 6  | 0.551901 | C | 1 |
| 3  | 0.372515 | C | 1 |
| 23 | 0.15271  | C | 1 |
| 7  | 0.199133 | M | 0 |
| 6  | 0.551901 | C | 1 |
| 17 | 0.175341 | C | 1 |
| 3  | 0.109984 | C | 1 |
| 3  | 0.500409 | C | 1 |
| 3  | 0.109984 | C | 1 |
| 3  | 0.109984 | C | 1 |
| 6  | 0.551901 | C | 1 |
| 3  | 0.372515 | C | 1 |
| 3  | 0.372515 | C | 1 |
| 6  | 0.551901 | C | 1 |
| 6  | 0.551901 | C | 1 |
| 23 | 0.15271  | C | 1 |
| 3  | 0.109984 | C | 1 |
| 7  | 0.199133 | M | 0 |

|    |          |   |   |
|----|----------|---|---|
| 6  | 0.551901 | C | 1 |
| 3  | 0.500409 | C | 1 |
| 20 | 0.530245 | C | 1 |
| 3  | 0.109984 | C | 1 |
| 6  | 0.551901 | C | 1 |
| 7  | 0.199133 | M | 0 |
| 6  | 0.551901 | C | 1 |
| 3  | 0.372515 | C | 1 |
| 5  | 0.588049 | C | 1 |
| 20 | 0.530245 | C | 1 |
| 3  | 0.109984 | C | 1 |
| 6  | 0.551901 | C | 1 |
| 6  | 0.551901 | C | 1 |
| 6  | 0.551901 | C | 1 |
| 5  | 0.588049 | C | 1 |
| 20 | 0.530245 | C | 1 |
| 3  | 0.500409 | C | 1 |
| 3  | 0.500409 | C | 1 |
| 7  | 0.199133 | M | 0 |
| 5  | 0.588049 | C | 1 |
| 5  | 0.588049 | C | 1 |
| 3  | 0.109984 | C | 1 |
| 20 | 0.530245 | C | 1 |
| 5  | 0.588049 | C | 1 |
| 3  | 0.500409 | C | 1 |
| 3  | 0.500409 | C | 1 |
| 6  | 0.551901 | C | 1 |
| 3  | 0.500409 | C | 1 |
| 6  | 0.551901 | C | 1 |
| 6  | 0.551901 | C | 1 |
| 3  | 0.500409 | C | 1 |
| 23 | 0.15271  | C | 1 |
| 5  | 0.588049 | C | 1 |
| 6  | 0.551901 | C | 1 |
| 17 | 0.175341 | C | 1 |
| 7  | 0.199133 | M | 0 |
| 5  | 0.588049 | C | 1 |
| 3  | 0.500409 | C | 1 |
| 6  | 0.551901 | C | 1 |
| 20 | 0.530245 | C | 1 |
| 6  | 0.551901 | C | 1 |
| 3  | 0.109984 | C | 1 |
| 7  | 0.199133 | M | 0 |
| 6  | 0.551901 | C | 1 |
| 7  | 0.199133 | M | 0 |
| 23 | 0.15271  | C | 1 |
| 3  | 0.500409 | C | 1 |
| 17 | 0.175341 | C | 1 |
| 6  | 0.551901 | C | 1 |
| 3  | 0.372515 | C | 1 |
| 6  | 0.551901 | C | 1 |
| 17 | 0.175341 | C | 1 |
| 3  | 0.109984 | C | 1 |
| 5  | 0.588049 | C | 1 |



|    |          |   |   |
|----|----------|---|---|
| 3  | 0.109984 | C | 1 |
| 3  | 0.374148 | C | 1 |
| 5  | 0.326986 | I | 0 |
| 5  | 0.326986 | I | 0 |
| 21 | 0.923242 | C | 1 |
| 5  | 0.641709 | C | 1 |
| 3  | 0.374148 | C | 1 |
| 21 | 0.923242 | C | 1 |
| 5  | 0.326986 | I | 0 |
| 24 | 0.854121 | C | 1 |
| 21 | 0.759463 | C | 1 |
| 3  | 0.374148 | C | 1 |
| 3  | 0.374148 | C | 1 |
| 24 | 0.854121 | C | 1 |
| 8  | 0.28633  | C | 1 |
| 21 | 0.759463 | C | 1 |
| 20 | 0.555087 | C | 1 |
| 21 | 0.297485 | I | 0 |
| 5  | 0.326986 | I | 0 |
| 8  | 0.28633  | C | 1 |
| 21 | 0.759463 | C | 1 |
| 5  | 0.641709 | C | 1 |
| 2  | 0.105109 | C | 1 |
| 5  | 0.41814  | C | 1 |
| 24 | 0.854121 | C | 1 |
| 2  | 0.105109 | C | 1 |
| 24 | 0.854121 | C | 1 |
| 24 | 0.854121 | C | 1 |
| 8  | 0.28633  | C | 1 |
| 21 | 0.312285 | R | 0 |
| 21 | 0.297485 | I | 0 |
| 24 | 0.854121 | C | 1 |
| 3  | 0.558166 | C | 1 |
| 21 | 0.923242 | C | 1 |
| 21 | 0.297485 | I | 0 |
| 24 | 0.854121 | C | 1 |
| 5  | 0.41814  | C | 1 |
| 21 | 0.297485 | I | 0 |
| 8  | 0.28633  | C | 1 |
| 2  | 0.105109 | C | 1 |
| 18 | 0.357134 | D | 1 |
| 3  | 0.374148 | C | 1 |
| 3  | 0.374148 | C | 1 |
| 2  | 0.105109 | C | 1 |
| 3  | 0.374148 | C | 1 |
| 20 | 0.555087 | C | 1 |
| 8  | 0.28633  | C | 1 |
| 1  | 0.181962 | C | 1 |
| 9  | 0.309696 | C | 1 |
| 5  | 0.641709 | C | 1 |
| 20 | 0.555087 | C | 1 |
| 5  | 0.41814  | C | 1 |
| 24 | 0.854121 | C | 1 |
| 3  | 0.558166 | C | 1 |

|    |          |   |   |
|----|----------|---|---|
| 21 | 0.297485 | I | 0 |
| 24 | 0.854121 | C | 1 |
| 8  | 0.28633  | C | 1 |
| 24 | 0.854121 | C | 1 |
| 5  | 0.41814  | C | 1 |
| 20 | 0.555087 | C | 1 |
| 21 | 0.759463 | C | 1 |
| 21 | 0.297485 | I | 0 |
| 18 | 0.357134 | D | 1 |
| 3  | 0.374148 | C | 1 |
| 3  | 0.374148 | C | 1 |
| 21 | 0.759463 | C | 1 |
| 3  | 0.558166 | C | 1 |
| 21 | 0.923242 | C | 1 |
| 21 | 0.923242 | C | 1 |
| 20 | 0.555087 | C | 1 |
| 21 | 0.923242 | C | 1 |
| 18 | 0.357134 | D | 1 |
| 3  | 0.374148 | C | 1 |
| 21 | 0.759463 | C | 1 |
| 21 | 0.312285 | R | 0 |
| 5  | 0.41814  | C | 1 |
| 3  | 0.374148 | C | 1 |
| 9  | 0.309696 | C | 1 |
| 18 | 0.357134 | D | 1 |
| 21 | 0.297485 | I | 0 |
| 5  | 0.326986 | I | 0 |
| 8  | 0.28633  | C | 1 |
| 5  | 0.41814  | C | 1 |
| 5  | 0.41814  | C | 1 |
| 1  | 0.181962 | C | 1 |
| 21 | 0.759463 | C | 1 |
| 8  | 0.28633  | C | 1 |
| 21 | 0.923242 | C | 1 |
| 8  | 0.28633  | C | 1 |
| 3  | 0.558166 | C | 1 |
| 3  | 0.374148 | C | 1 |
| 20 | 0.555087 | C | 1 |
| 3  | 0.558166 | C | 1 |
| 21 | 0.923242 | C | 1 |
| 3  | 0.558166 | C | 1 |
| 8  | 0.28633  | C | 1 |
| 2  | 0.105109 | C | 1 |
| 18 | 0.357134 | D | 1 |
| 24 | 0.854121 | C | 1 |
| 3  | 0.374148 | C | 1 |
| 21 | 0.759463 | C | 1 |
| 8  | 0.28633  | C | 1 |
| 18 | 0.357134 | D | 1 |
| 21 | 0.759463 | C | 1 |
| 21 | 0.297485 | I | 0 |
| 18 | 0.357134 | D | 1 |
| 21 | 0.312285 | R | 0 |
| 8  | 0.28633  | C | 1 |

|    |          |   |   |
|----|----------|---|---|
| 9  | 0.309696 | C | 1 |
| 21 | 0.297485 | I | 0 |
| 8  | 0.28633  | C | 1 |
| 21 | 0.923242 | C | 1 |
| 1  | 0.181962 | C | 1 |
| 6  | 0.428615 | C | 1 |
| 7  | 0.418272 | C | 1 |
| 13 | 0.359973 | C | 1 |
| 3  | 0.65359  | C | 1 |
| 3  | 0.487171 | I | 0 |
| 13 | 0.355939 | C | 1 |
| 11 | 0.564392 | C | 1 |
| 13 | 0.359973 | C | 1 |
| 6  | 0.123543 | C | 1 |
| 6  | 0.428615 | C | 1 |
| 6  | 0.428615 | C | 1 |
| 11 | 0.564392 | C | 1 |
| 10 | 0.38691  | I | 0 |
| 13 | 0.355939 | C | 1 |
| 2  | 0.229235 | C | 1 |
| 7  | 0.169143 | I | 0 |
| 7  | 0.418272 | C | 1 |
| 10 | 0.38691  | I | 0 |
| 2  | 0.229235 | C | 1 |
| 7  | 0.418272 | C | 1 |
| 7  | 0.418272 | C | 1 |
| 3  | 0.487171 | I | 0 |
| 5  | 0.112278 | C | 1 |
| 3  | 0.487171 | I | 0 |
| 10 | 0.38691  | I | 0 |
| 14 | 0.072824 | C | 1 |
| 7  | 0.418272 | C | 1 |
| 3  | 0.487171 | I | 0 |
| 6  | 0.428615 | C | 1 |
| 7  | 0.418272 | C | 1 |
| 11 | 0.564392 | C | 1 |
| 7  | 0.169143 | I | 0 |
| 7  | 0.418272 | C | 1 |
| 6  | 0.428615 | C | 1 |
| 3  | 0.487171 | I | 0 |
| 3  | 0.65359  | C | 1 |
| 7  | 0.169143 | I | 0 |
| 7  | 0.418272 | C | 1 |
| 7  | 0.418272 | C | 1 |
| 7  | 0.169143 | I | 0 |
| 6  | 0.123543 | C | 1 |
| 7  | 0.418272 | C | 1 |
| 13 | 0.359973 | C | 1 |
| 2  | 0.229235 | C | 1 |
| 7  | 0.418272 | C | 1 |
| 2  | 0.229235 | C | 1 |
| 5  | 0.112278 | C | 1 |
| 5  | 0.112278 | C | 1 |
| 10 | 0.38691  | I | 0 |

|    |          |   |   |
|----|----------|---|---|
| 10 | 0.38691  | I | 0 |
| 5  | 0.112278 | C | 1 |
| 5  | 0.112278 | C | 1 |
| 10 | 0.38691  | I | 0 |
| 14 | 0.072824 | C | 1 |
| 7  | 0.418272 | C | 1 |
| 14 | 0.072824 | C | 1 |
| 2  | 0.229235 | C | 1 |
| 3  | 0.487171 | I | 0 |
| 10 | 0.38691  | I | 0 |
| 3  | 0.65359  | C | 1 |
| 11 | 0.564392 | C | 1 |
| 14 | 0.072824 | C | 1 |
| 5  | 0.112278 | C | 1 |
| 7  | 0.418272 | C | 1 |
| 11 | 0.564392 | C | 1 |
| 13 | 0.355939 | C | 1 |
| 11 | 0.564392 | C | 1 |
| 14 | 0.072824 | C | 1 |
| 6  | 0.428615 | C | 1 |
| 6  | 0.123543 | C | 1 |
| 11 | 0.564392 | C | 1 |
| 7  | 0.169143 | I | 0 |
| 21 | 0.256659 | I | 0 |
| 21 | 0.256659 | I | 0 |
| 21 | 0.256659 | I | 0 |
| 7  | 0.079602 | C | 1 |
| 7  | 0.079602 | C | 1 |
| 7  | 0.079602 | C | 1 |
| 21 | 0.256659 | I | 0 |
| 21 | 0.256659 | I | 0 |
| 7  | 0.079602 | C | 1 |
| 7  | 0.079602 | C | 1 |
| 7  | 0.079602 | C | 1 |
| 7  | 0.079602 | C | 1 |
| 21 | 0.256659 | I | 0 |
| 21 | 0.256659 | I | 0 |
| 7  | 0.200979 | C | 1 |
| 7  | 0.200979 | C | 1 |
| 23 | 0.260445 | C | 1 |
| 6  | 0.302796 | C | 1 |
| 6  | 0.302796 | C | 1 |
| 23 | 0.260445 | C | 1 |
| 7  | 0.200979 | C | 1 |
| 6  | 0.302796 | C | 1 |
| 6  | 0.302796 | C | 1 |
| 20 | 0.15336  | C | 1 |
| 20 | 0.15336  | C | 1 |
| 5  | 0.130056 | C | 1 |
| 23 | 0.260445 | C | 1 |
| 6  | 0.302796 | C | 1 |
| 20 | 0.15336  | C | 1 |
| 7  | 0.200979 | C | 1 |
| 5  | 0.130056 | C | 1 |

|    |          |   |   |
|----|----------|---|---|
| 23 | 0.260445 | C | 1 |
| 5  | 0.130056 | C | 1 |
| 23 | 0.260445 | C | 1 |
| 23 | 0.260445 | C | 1 |
| 7  | 0.200979 | C | 1 |
| 5  | 0.130056 | C | 1 |
| 20 | 0.15336  | C | 1 |
| 5  | 0.130056 | C | 1 |
| 23 | 0.260445 | C | 1 |
| 6  | 0.302796 | C | 1 |
| 23 | 0.260445 | C | 1 |
| 5  | 0.130056 | C | 1 |
| 23 | 0.260445 | C | 1 |
| 7  | 0.200979 | C | 1 |
| 7  | 0.200979 | C | 1 |
| 20 | 0.15336  | C | 1 |
| 23 | 0.224905 | C | 1 |
| 23 | 0.224905 | C | 1 |
| 9  | 0.283309 | C | 1 |
| 9  | 0.283309 | C | 1 |
| 9  | 0.283309 | C | 1 |
| 23 | 0.224905 | C | 1 |
| 9  | 0.283309 | C | 1 |
| 23 | 0.224905 | C | 1 |
| 9  | 0.283309 | C | 1 |
| 23 | 0.224905 | C | 1 |
| 9  | 0.283309 | C | 1 |
| 23 | 0.224905 | C | 1 |
| 9  | 0.283309 | C | 1 |
| 23 | 0.224905 | C | 1 |
| 5  | 0.629635 | C | 1 |
| 12 | 0.406625 | C | 1 |
| 5  | 0.614332 | C | 1 |
| 2  | 0.13089  | C | 1 |
| 6  | 0.336095 | C | 1 |
| 12 | 0.406625 | C | 1 |
| 22 | 0.5928   | C | 1 |
| 6  | 0.291168 | C | 1 |
| 6  | 0.291168 | C | 1 |
| 5  | 0.629635 | C | 1 |
| 10 | 0.458813 | C | 1 |
| 6  | 0.238794 | C | 1 |
| 10 | 0.458813 | C | 1 |
| 5  | 0.629635 | C | 1 |
| 5  | 0.614332 | C | 1 |
| 6  | 0.291168 | C | 1 |
| 12 | 0.406625 | C | 1 |
| 5  | 0.629635 | C | 1 |
| 12 | 0.406625 | C | 1 |
| 12 | 0.406625 | C | 1 |
| 6  | 0.336095 | C | 1 |
| 2  | 0.13089  | C | 1 |
| 6  | 0.291168 | C | 1 |
| 10 | 0.458813 | C | 1 |
| 6  | 0.238794 | C | 1 |

|    |          |   |   |
|----|----------|---|---|
| 12 | 0.406625 | C | 1 |
| 12 | 0.406625 | C | 1 |
| 5  | 0.629635 | C | 1 |
| 5  | 0.53076  | B | 1 |
| 5  | 0.53076  | B | 1 |
| 6  | 0.291168 | C | 1 |
| 6  | 0.291168 | C | 1 |
| 10 | 0.458813 | C | 1 |
| 10 | 0.458813 | C | 1 |
| 12 | 0.406625 | C | 1 |
| 5  | 0.53076  | B | 1 |
| 6  | 0.238794 | C | 1 |
| 5  | 0.629635 | C | 1 |
| 2  | 0.13089  | C | 1 |
| 2  | 0.13089  | C | 1 |
| 22 | 0.5928   | C | 1 |
| 5  | 0.629635 | C | 1 |
| 10 | 0.458813 | C | 1 |
| 5  | 0.614332 | C | 1 |
| 5  | 0.629635 | C | 1 |
| 5  | 0.629635 | C | 1 |
| 5  | 0.53076  | B | 1 |
| 6  | 0.291168 | C | 1 |
| 6  | 0.291168 | C | 1 |
| 6  | 0.238794 | C | 1 |
| 10 | 0.458813 | C | 1 |
| 5  | 0.614332 | C | 1 |
| 5  | 0.53076  | B | 1 |
| 2  | 0.13089  | C | 1 |
| 5  | 0.53076  | B | 1 |
| 6  | 0.291168 | C | 1 |
| 6  | 0.291168 | C | 1 |
| 12 | 0.406625 | C | 1 |
| 5  | 0.53076  | B | 1 |
| 6  | 0.336095 | C | 1 |
| 22 | 0.5928   | C | 1 |
| 5  | 0.53076  | B | 1 |
| 6  | 0.238794 | C | 1 |
| 2  | 0.13089  | C | 1 |
| 10 | 0.458813 | C | 1 |
| 5  | 0.614332 | C | 1 |
| 6  | 0.238794 | C | 1 |
| 6  | 0.238794 | C | 1 |
| 5  | 0.614332 | C | 1 |
| 5  | 0.53076  | B | 1 |
| 5  | 0.629635 | C | 1 |
| 22 | 0.5928   | C | 1 |
| 6  | 0.238794 | C | 1 |
| 12 | 0.406625 | C | 1 |
| 10 | 0.458813 | C | 1 |
| 6  | 0.238794 | C | 1 |
| 6  | 0.291168 | C | 1 |
| 5  | 0.614332 | C | 1 |
| 10 | 0.458813 | C | 1 |

|    |          |   |   |
|----|----------|---|---|
| 6  | 0.291168 | C | 1 |
| 5  | 0.53076  | B | 1 |
| 5  | 0.614332 | C | 1 |
| 10 | 0.458813 | C | 1 |
| 6  | 0.238794 | C | 1 |
| 6  | 0.238794 | C | 1 |
| 10 | 0.458813 | C | 1 |
| 6  | 0.336095 | C | 1 |
| 22 | 0.5928   | C | 1 |
| 2  | 0.13089  | C | 1 |
| 5  | 0.629635 | C | 1 |
| 10 | 0.458813 | C | 1 |
| 2  | 0.13089  | C | 1 |
| 10 | 0.458813 | C | 1 |
| 2  | 0.13089  | C | 1 |
| 5  | 0.614332 | C | 1 |
| 5  | 0.629635 | C | 1 |
| 6  | 0.336095 | C | 1 |
| 5  | 0.614332 | C | 1 |
| 6  | 0.291168 | C | 1 |
| 14 | 0.592336 | B | 1 |
| 14 | 0.592336 | B | 1 |
| 2  | 0.225668 | C | 1 |
| 21 | 0.82441  | C | 1 |
| 1  | 0.239741 | C | 1 |
| 9  | 0.33052  | C | 1 |
| 15 | 0.467545 | G | 0 |
| 14 | 0.592336 | B | 1 |
| 1  | 0.239741 | C | 1 |
| 9  | 0.312621 | C | 1 |
| 2  | 0.068284 | C | 1 |
| 9  | 0.33052  | C | 1 |
| 2  | 0.068284 | C | 1 |
| 15 | 0.467545 | G | 0 |
| 15 | 0.467545 | G | 0 |
| 13 | 0.546976 | C | 1 |
| 14 | 0.592336 | B | 1 |
| 15 | 0.467545 | G | 0 |
| 21 | 0.82441  | C | 1 |
| 2  | 0.225668 | C | 1 |
| 15 | 0.467545 | G | 0 |
| 14 | 0.592336 | B | 1 |
| 17 | 0.592783 | C | 1 |
| 17 | 0.592783 | C | 1 |
| 9  | 0.33052  | C | 1 |
| 9  | 0.33052  | C | 1 |
| 14 | 0.592336 | B | 1 |
| 7  | 0.46115  | C | 1 |
| 13 | 0.546976 | C | 1 |
| 9  | 0.33052  | C | 1 |
| 10 | 0.321297 | C | 1 |
| 7  | 0.46115  | C | 1 |
| 17 | 0.592783 | C | 1 |
| 13 | 0.546976 | C | 1 |

|    |          |   |   |
|----|----------|---|---|
| 15 | 0.467545 | G | 0 |
| 9  | 0.33052  | C | 1 |
| 2  | 0.225668 | C | 1 |
| 15 | 0.467545 | G | 0 |
| 21 | 0.82441  | C | 1 |
| 10 | 0.321297 | C | 1 |
| 20 | 0.769372 | E | 1 |
| 9  | 0.312621 | C | 1 |
| 10 | 0.321297 | C | 1 |
| 9  | 0.33052  | C | 1 |
| 10 | 0.321297 | C | 1 |
| 17 | 0.592783 | C | 1 |
| 14 | 0.592336 | B | 1 |
| 13 | 0.546976 | C | 1 |
| 1  | 0.239741 | C | 1 |
| 10 | 0.321297 | C | 1 |
| 1  | 0.239741 | C | 1 |
| 10 | 0.321297 | C | 1 |
| 6  | 0.312971 | C | 1 |
| 9  | 0.33052  | C | 1 |
| 15 | 0.467545 | G | 0 |
| 14 | 0.592336 | B | 1 |
| 13 | 0.546976 | C | 1 |
| 9  | 0.312621 | C | 1 |
| 7  | 0.46115  | C | 1 |
| 9  | 0.33052  | C | 1 |
| 9  | 0.33052  | C | 1 |
| 15 | 0.467545 | G | 0 |
| 10 | 0.321297 | C | 1 |
| 20 | 0.769372 | E | 1 |
| 2  | 0.225668 | C | 1 |
| 10 | 0.321297 | C | 1 |
| 10 | 0.321297 | C | 1 |
| 10 | 0.321297 | C | 1 |
| 6  | 0.312971 | C | 1 |
| 17 | 0.592783 | C | 1 |
| 20 | 0.769372 | E | 1 |
| 9  | 0.312621 | C | 1 |
| 2  | 0.225668 | C | 1 |
| 13 | 0.546976 | C | 1 |
| 10 | 0.321297 | C | 1 |
| 17 | 0.592783 | C | 1 |
| 17 | 0.592783 | C | 1 |
| 6  | 0.312971 | C | 1 |
| 17 | 0.592783 | C | 1 |
| 9  | 0.33052  | C | 1 |
| 13 | 0.546976 | C | 1 |
| 10 | 0.321297 | C | 1 |
| 9  | 0.33052  | C | 1 |
| 2  | 0.225668 | C | 1 |
| 10 | 0.321297 | C | 1 |
| 7  | 0.46115  | C | 1 |
| 14 | 0.592336 | B | 1 |
| 6  | 0.312971 | C | 1 |



|    |          |   |   |
|----|----------|---|---|
| 1  | 0.239741 | C | 1 |
| 9  | 0.312621 | C | 1 |
| 7  | 0.46115  | C | 1 |
| 21 | 0.82441  | C | 1 |
| 10 | 0.321297 | C | 1 |
| 9  | 0.33052  | C | 1 |
| 9  | 0.33052  | C | 1 |
| 9  | 0.33052  | C | 1 |
| 9  | 0.33052  | C | 1 |
| 9  | 0.33052  | C | 1 |
| 6  | 0.312971 | C | 1 |
| 17 | 0.592783 | C | 1 |
| 17 | 0.592783 | C | 1 |
| 7  | 0.46115  | C | 1 |
| 20 | 0.769372 | E | 1 |
| 1  | 0.239741 | C | 1 |
| 6  | 0.312971 | C | 1 |
| 10 | 0.321297 | C | 1 |
| 10 | 0.321297 | C | 1 |
| 9  | 0.33052  | C | 1 |
| 1  | 0.239741 | C | 1 |
| 9  | 0.33052  | C | 1 |
| 7  | 0.46115  | C | 1 |
| 7  | 0.46115  | C | 1 |
| 2  | 0.068284 | C | 1 |
| 9  | 0.33052  | C | 1 |
| 13 | 0.546976 | C | 1 |
| 9  | 0.312621 | C | 1 |
| 14 | 0.592336 | B | 1 |
| 7  | 0.46115  | C | 1 |
| 15 | 0.467545 | G | 0 |
| 20 | 0.769372 | E | 1 |
| 14 | 0.592336 | B | 1 |
| 9  | 0.312621 | C | 1 |
| 7  | 0.46115  | C | 1 |
| 7  | 0.46115  | C | 1 |
| 2  | 0.225668 | C | 1 |
| 13 | 0.546976 | C | 1 |
| 7  | 0.46115  | C | 1 |
| 7  | 0.46115  | C | 1 |
| 2  | 0.548742 | C | 1 |
| 2  | 0.548742 | C | 1 |
| 2  | 0.548742 | C | 1 |
| 2  | 0.548742 | C | 1 |
| 2  | 0.548742 | C | 1 |
| 2  | 0.548742 | C | 1 |
| 2  | 0.548742 | C | 1 |
| 24 | 0.572467 | C | 1 |
| 24 | 0.572467 | C | 1 |
| 17 | 0.606592 | C | 1 |
| 17 | 0.508399 | B | 1 |
| 21 | 0.494335 | C | 1 |
| 5  | 0.446883 | C | 1 |
| 6  | 0.405183 | A | 0 |

|    |          |   |   |
|----|----------|---|---|
| 20 | 0.360029 | R | 0 |
| 23 | 0.476495 | C | 1 |
| 24 | 0.068284 | I | 0 |
| 20 | 0.360029 | R | 0 |
| 23 | 0.476495 | C | 1 |
| 6  | 0.17312  | A | 0 |
| 20 | 0.360029 | R | 0 |
| 23 | 0.518631 | C | 1 |
| 17 | 0.508399 | B | 1 |
| 24 | 0.572467 | C | 1 |
| 6  | 0.405183 | A | 0 |
| 6  | 0.405183 | A | 0 |
| 23 | 0.476495 | C | 1 |
| 21 | 0.494335 | C | 1 |
| 17 | 0.606592 | C | 1 |
| 7  | 0.141016 | C | 1 |
| 23 | 0.518631 | C | 1 |
| 21 | 0.494335 | C | 1 |
| 21 | 0.494335 | C | 1 |
| 17 | 0.606592 | C | 1 |
| 23 | 0.476495 | C | 1 |
| 17 | 0.606592 | C | 1 |
| 24 | 0.068284 | I | 0 |
| 23 | 0.518631 | C | 1 |
| 17 | 0.508399 | B | 1 |
| 17 | 0.508399 | B | 1 |
| 6  | 0.405183 | A | 0 |
| 23 | 0.518631 | C | 1 |
| 17 | 0.508399 | B | 1 |
| 17 | 0.508399 | B | 1 |
| 23 | 0.518631 | C | 1 |
| 23 | 0.518631 | C | 1 |
| 17 | 0.508399 | B | 1 |
| 21 | 0.494335 | C | 1 |
| 20 | 0.405789 | A | 0 |
| 23 | 0.518631 | C | 1 |
| 23 | 0.518631 | C | 1 |
| 21 | 0.494335 | C | 1 |
| 23 | 0.518631 | C | 1 |
| 23 | 0.476495 | C | 1 |
| 23 | 0.476495 | C | 1 |
| 6  | 0.17312  | A | 0 |
| 20 | 0.405789 | A | 0 |
| 20 | 0.360029 | R | 0 |
| 7  | 0.141016 | C | 1 |
| 5  | 0.446883 | C | 1 |
| 17 | 0.508399 | B | 1 |
| 5  | 0.446883 | C | 1 |
| 23 | 0.476495 | C | 1 |
| 23 | 0.518631 | C | 1 |
| 20 | 0.405789 | A | 0 |
| 24 | 0.068284 | I | 0 |
| 24 | 0.572467 | C | 1 |
| 5  | 0.446883 | C | 1 |

|    |          |   |   |
|----|----------|---|---|
| 20 | 0.405789 | A | 0 |
| 6  | 0.405183 | A | 0 |
| 7  | 0.141016 | C | 1 |
| 5  | 0.446883 | C | 1 |
| 7  | 0.141016 | C | 1 |
| 20 | 0.360029 | R | 0 |
| 21 | 0.494335 | C | 1 |
| 7  | 0.141016 | C | 1 |
| 23 | 0.518631 | C | 1 |
| 20 | 0.360029 | R | 0 |
| 23 | 0.518631 | C | 1 |
| 21 | 0.494335 | C | 1 |
| 21 | 0.494335 | C | 1 |
| 21 | 0.494335 | C | 1 |
| 21 | 0.494335 | C | 1 |
| 21 | 0.494335 | C | 1 |
| 6  | 0.17312  | A | 0 |
| 24 | 0.572467 | C | 1 |
| 7  | 0.141016 | C | 1 |
| 23 | 0.518631 | C | 1 |
| 7  | 0.141016 | C | 1 |
| 7  | 0.141016 | C | 1 |
| 23 | 0.476495 | C | 1 |
| 17 | 0.508399 | B | 1 |
| 20 | 0.360029 | R | 0 |
| 20 | 0.405789 | A | 0 |
| 20 | 0.360029 | R | 0 |
| 17 | 0.606592 | C | 1 |
| 17 | 0.606592 | C | 1 |
| 6  | 0.17312  | A | 0 |
| 23 | 0.476495 | C | 1 |
| 6  | 0.17312  | A | 0 |
| 6  | 0.405183 | A | 0 |
| 17 | 0.508399 | B | 1 |
| 5  | 0.270496 | I | 0 |
| 5  | 0.270496 | I | 0 |
| 7  | 0.222493 | C | 1 |
| 21 | 0.348855 | S | 0 |
| 11 | 0.231862 | C | 1 |
| 1  | 0.387322 | C | 1 |
| 21 | 0.348855 | S | 0 |
| 21 | 0.348855 | S | 0 |
| 5  | 0.426996 | C | 1 |
| 15 | 0.667972 | C | 1 |
| 15 | 0.667972 | C | 1 |
| 21 | 0.348855 | S | 0 |
| 15 | 0.553808 | C | 1 |
| 7  | 0.234016 | C | 1 |
| 7  | 0.30842  | C | 1 |
| 6  | 0.197034 | C | 1 |
| 7  | 0.234016 | C | 1 |
| 6  | 0.269819 | C | 1 |
| 15 | 0.667972 | C | 1 |
| 6  | 0.197034 | C | 1 |

|               |   |
|---------------|---|
| 6 0.197034 C  | 1 |
| 21 0.348855 S | 0 |
| 7 0.230262 M  | 0 |
| 7 0.230262 M  | 0 |
| 7 0.230262 M  | 0 |
| 6 0.197034 C  | 1 |
| 1 0.387322 C  | 1 |
| 15 0.667972 C | 1 |
| 15 0.667972 C | 1 |
| 5 0.426996 C  | 1 |
| 7 0.222493 C  | 1 |
| 21 0.348855 S | 0 |
| 6 0.269819 C  | 1 |
| 7 0.30842 C   | 1 |
| 11 0.231862 C | 1 |
| 21 0.348855 S | 0 |
| 17 0.235536 C | 1 |
| 17 0.235536 C | 1 |
| 21 0.348855 S | 0 |
| 15 0.553808 C | 1 |
| 15 0.667972 C | 1 |
| 15 0.667972 C | 1 |
| 15 0.667972 C | 1 |
| 6 0.269819 C  | 1 |
| 6 0.197034 C  | 1 |
| 21 0.348855 S | 0 |
| 6 0.418306 C  | 1 |
| 7 0.230262 M  | 0 |
| 7 0.230262 M  | 0 |
| 5 0.426996 C  | 1 |
| 5 0.426996 C  | 1 |
| 21 0.348855 S | 0 |
| 1 0.387322 C  | 1 |
| 21 0.348855 S | 0 |
| 11 0.231862 C | 1 |
| 15 0.553808 C | 1 |
| 15 0.667972 C | 1 |
| 11 0.231862 C | 1 |
| 21 0.348855 S | 0 |
| 15 0.667972 C | 1 |
| 21 0.348855 S | 0 |
| 6 0.418306 C  | 1 |
| 15 0.667972 C | 1 |
| 5 0.270496 I  | 0 |
| 15 0.667972 C | 1 |
| 6 0.269819 C  | 1 |
| 6 0.197034 C  | 1 |
| 7 0.234016 C  | 1 |
| 11 0.231862 C | 1 |
| 21 0.348855 S | 0 |
| 21 0.348855 S | 0 |
| 21 0.348855 S | 0 |
| 7 0.222493 C  | 1 |
| 21 0.348855 S | 0 |

|    |          |   |   |
|----|----------|---|---|
| 15 | 0.667972 | C | 1 |
| 1  | 0.387322 | C | 1 |
| 5  | 0.426996 | C | 1 |
| 15 | 0.667972 | C | 1 |
| 15 | 0.667972 | C | 1 |
| 7  | 0.30842  | C | 1 |
| 15 | 0.553808 | C | 1 |
| 7  | 0.30842  | C | 1 |
| 21 | 0.348855 | S | 0 |
| 21 | 0.348855 | S | 0 |
| 7  | 0.30842  | C | 1 |
| 21 | 0.348855 | S | 0 |
| 1  | 0.387322 | C | 1 |
| 7  | 0.222493 | C | 1 |
| 7  | 0.230262 | M | 0 |
| 15 | 0.553808 | C | 1 |
| 21 | 0.348855 | S | 0 |
| 17 | 0.235536 | C | 1 |
| 5  | 0.270496 | I | 0 |
| 6  | 0.197034 | C | 1 |
| 6  | 0.418306 | C | 1 |
| 21 | 0.348855 | S | 0 |
| 6  | 0.269819 | C | 1 |
| 6  | 0.197034 | C | 1 |
| 7  | 0.222493 | C | 1 |
| 15 | 0.222442 | C | 1 |
| 11 | 0.231862 | C | 1 |
| 21 | 0.348855 | S | 0 |
| 5  | 0.270496 | I | 0 |
| 17 | 0.235536 | C | 1 |
| 11 | 0.231862 | C | 1 |
| 21 | 0.348855 | S | 0 |
| 6  | 0.197034 | C | 1 |
| 7  | 0.230262 | M | 0 |
| 11 | 0.231862 | C | 1 |
| 6  | 0.197034 | C | 1 |
| 17 | 0.235536 | C | 1 |
| 21 | 0.348855 | S | 0 |
| 21 | 0.348855 | S | 0 |
| 7  | 0.222493 | C | 1 |
| 7  | 0.30842  | C | 1 |
| 7  | 0.234016 | C | 1 |
| 15 | 0.222442 | C | 1 |
| 21 | 0.348855 | S | 0 |
| 15 | 0.553808 | C | 1 |
| 5  | 0.270496 | I | 0 |
| 21 | 0.348855 | S | 0 |
| 21 | 0.348855 | S | 0 |
| 21 | 0.348855 | S | 0 |
| 6  | 0.269819 | C | 1 |
| 11 | 0.231862 | C | 1 |
| 1  | 0.387322 | C | 1 |
| 6  | 0.269819 | C | 1 |
| 21 | 0.348855 | S | 0 |

|    |          |   |   |
|----|----------|---|---|
| 21 | 0.348855 | S | 0 |
| 15 | 0.553808 | C | 1 |
| 15 | 0.222442 | C | 1 |
| 6  | 0.197034 | C | 1 |
| 21 | 0.348855 | S | 0 |
| 6  | 0.197034 | C | 1 |
| 7  | 0.222493 | C | 1 |
| 21 | 0.348855 | S | 0 |
| 21 | 0.348855 | S | 0 |
| 15 | 0.667972 | C | 1 |
| 6  | 0.269819 | C | 1 |
| 15 | 0.553808 | C | 1 |
| 21 | 0.348855 | S | 0 |
| 7  | 0.234016 | C | 1 |
| 6  | 0.269819 | C | 1 |
| 2  | 0.249357 | C | 1 |
| 2  | 0.249357 | C | 1 |
| 2  | 0.249357 | C | 1 |
| 3  | 0.269156 | C | 1 |
| 3  | 0.269156 | C | 1 |
| 2  | 0.525828 | C | 1 |
| 3  | 0.269156 | C | 1 |
| 2  | 0.525828 | C | 1 |
| 2  | 0.525828 | C | 1 |
| 2  | 0.525828 | C | 1 |
| 2  | 0.525828 | C | 1 |
| 2  | 0.525828 | C | 1 |
| 2  | 0.525828 | C | 1 |
| 2  | 0.525828 | C | 1 |
| 3  | 0.269156 | C | 1 |
| 3  | 0.269156 | C | 1 |
| 2  | 0.602604 | C | 1 |
| 6  | 0.763765 | C | 1 |
| 7  | 0.456612 | I | 0 |
| 7  | 0.392225 | C | 1 |
| 9  | 0.505574 | C | 1 |
| 9  | 0.507217 | C | 1 |
| 9  | 0.505574 | C | 1 |
| 7  | 0.702046 | C | 1 |
| 7  | 0.482074 | C | 1 |
| 1  | 0.32559  | C | 1 |
| 1  | 0.490981 | C | 1 |
| 7  | 0.312569 | I | 0 |
| 6  | 0.763765 | C | 1 |
| 7  | 0.131826 | C | 1 |
| 20 | 0.448532 | C | 1 |
| 6  | 0.586834 | L | 0 |
| 10 | 0.684871 | C | 1 |
| 5  | 0.298252 | C | 1 |
| 18 | 0.74455  | E | 1 |
| 7  | 0.482074 | C | 1 |
| 9  | 0.153652 | C | 1 |
| 11 | 0.489289 | C | 1 |
| 7  | 0.478675 | C | 1 |
| 7  | 0.481227 | C | 1 |

|    |          |   |   |
|----|----------|---|---|
| 9  | 0.271907 | I | 0 |
| 1  | 0.441054 | C | 1 |
| 7  | 0.33563  | C | 1 |
| 1  | 0.507279 | E | 1 |
| 24 | 0.633121 | S | 0 |
| 7  | 0.538428 | C | 1 |
| 22 | 0.511848 | C | 1 |
| 7  | 0.243965 | C | 1 |
| 23 | 0.668943 | C | 1 |
| 23 | 0.668943 | C | 1 |
| 6  | 0.330927 | C | 1 |
| 10 | 0.176405 | C | 1 |
| 6  | 0.379824 | C | 1 |
| 6  | 0.586834 | L | 0 |
| 17 | 0.610373 | C | 1 |
| 8  | 0.10283  | C | 1 |
| 6  | 0.175604 | C | 1 |
| 7  | 0.482074 | C | 1 |
| 2  | 0.602604 | C | 1 |
| 24 | 0.55057  | C | 1 |
| 24 | 0.679887 | D | 1 |
| 7  | 0.481227 | C | 1 |
| 10 | 0.472115 | C | 1 |
| 17 | 0.374845 | C | 1 |
| 6  | 0.330927 | C | 1 |
| 20 | 0.502777 | C | 1 |
| 15 | 0.599951 | C | 1 |
| 7  | 0.486291 | C | 1 |
| 10 | 0.684871 | C | 1 |
| 11 | 0.489289 | C | 1 |
| 6  | 0.68682  | N | 0 |
| 20 | 0.448532 | C | 1 |
| 7  | 0.335725 | C | 1 |
| 20 | 0.477586 | F | 0 |
| 8  | 0.278296 | M | 0 |
| 7  | 0.51699  | I | 0 |
| 11 | 0.489289 | C | 1 |
| 1  | 0.39667  | I | 0 |
| 24 | 0.55057  | C | 1 |
| 20 | 0.448532 | C | 1 |
| 10 | 0.353559 | C | 1 |
| 8  | 0.278296 | M | 0 |
| 6  | 0.763765 | C | 1 |
| 22 | 0.761753 | C | 1 |
| 15 | 0.599951 | C | 1 |
| 7  | 0.645108 | C | 1 |
| 23 | 0.668943 | C | 1 |
| 8  | 0.662474 | E | 1 |
| 6  | 0.122899 | C | 1 |
| 6  | 0.68682  | N | 0 |
| 9  | 0.153652 | C | 1 |
| 5  | 0.559303 | C | 1 |
| 23 | 0.642835 | C | 1 |
| 7  | 0.392225 | C | 1 |

|    |          |   |   |
|----|----------|---|---|
| 10 | 0.353559 | C | 1 |
| 6  | 0.663348 | C | 1 |
| 7  | 0.392225 | C | 1 |
| 6  | 0.558815 | C | 1 |
| 9  | 0.24529  | C | 1 |
| 12 | 0.540903 | E | 1 |
| 20 | 0.684777 | C | 1 |
| 8  | 0.10283  | C | 1 |
| 10 | 0.684871 | C | 1 |
| 3  | 0.144589 | C | 1 |
| 11 | 0.705592 | C | 1 |
| 5  | 0.450597 | C | 1 |
| 6  | 0.379824 | C | 1 |
| 7  | 0.51699  | I | 0 |
| 7  | 0.367149 | C | 1 |
| 23 | 0.861665 | F | 0 |
| 19 | 0.790469 | F | 0 |
| 6  | 0.468501 | C | 1 |
| 5  | 0.377    | C | 1 |
| 1  | 0.458864 | C | 1 |
| 7  | 0.441878 | C | 1 |
| 20 | 0.502777 | C | 1 |
| 7  | 0.566398 | E | 1 |
| 6  | 0.266735 | C | 1 |
| 6  | 0.58163  | C | 1 |
| 6  | 0.266735 | C | 1 |
| 6  | 0.58163  | C | 1 |
| 13 | 0.483533 | C | 1 |
| 10 | 0.176405 | C | 1 |
| 7  | 0.392225 | C | 1 |
| 10 | 0.684871 | C | 1 |
| 7  | 0.688024 | F | 0 |
| 23 | 0.668943 | C | 1 |
| 6  | 0.48915  | C | 1 |
| 23 | 0.818492 | C | 1 |
| 23 | 0.642835 | C | 1 |
| 7  | 0.243965 | C | 1 |
| 10 | 0.684871 | C | 1 |
| 6  | 0.68682  | N | 0 |
| 6  | 0.68682  | N | 0 |
| 6  | 0.68682  | N | 0 |
| 6  | 0.68682  | N | 0 |
| 6  | 0.68682  | N | 0 |
| 5  | 0.438549 | I | 0 |
| 7  | 0.702046 | C | 1 |
| 9  | 0.507217 | C | 1 |
| 20 | 0.477586 | F | 0 |
| 7  | 0.482074 | C | 1 |
| 20 | 0.502777 | C | 1 |
| 6  | 0.412065 | L | 0 |
| 9  | 0.507217 | C | 1 |
| 5  | 0.298252 | C | 1 |
| 8  | 0.602263 | K | 1 |
| 23 | 0.642835 | C | 1 |



|    |          |   |   |
|----|----------|---|---|
| 8  | 0.358124 | C | 1 |
| 6  | 0.48915  | C | 1 |
| 9  | 0.183916 | C | 1 |
| 2  | 0.789853 | C | 1 |
| 20 | 0.684777 | C | 1 |
| 1  | 0.679348 | E | 1 |
| 9  | 0.399031 | C | 1 |
| 5  | 0.532275 | C | 1 |
| 20 | 0.502777 | C | 1 |
| 1  | 0.111323 | C | 1 |
| 7  | 0.367149 | C | 1 |
| 2  | 0.446364 | E | 1 |
| 6  | 0.58163  | C | 1 |
| 7  | 0.301164 | C | 1 |
| 3  | 0.417669 | C | 1 |
| 7  | 0.596872 | F | 0 |
| 12 | 0.540903 | E | 1 |
| 1  | 0.59178  | C | 1 |
| 1  | 0.441054 | C | 1 |
| 6  | 0.122899 | C | 1 |
| 7  | 0.538428 | C | 1 |
| 2  | 0.398601 | C | 1 |
| 9  | 0.399031 | C | 1 |
| 7  | 0.243965 | C | 1 |
| 23 | 0.668943 | C | 1 |
| 2  | 0.177339 | C | 1 |
| 10 | 0.353559 | C | 1 |
| 13 | 0.483533 | C | 1 |
| 24 | 0.633121 | S | 0 |
| 7  | 0.482074 | C | 1 |
| 7  | 0.486291 | C | 1 |
| 6  | 0.48915  | C | 1 |
| 8  | 0.10283  | C | 1 |
| 6  | 0.763765 | C | 1 |
| 12 | 0.540903 | E | 1 |
| 10 | 0.472115 | C | 1 |
| 7  | 0.392225 | C | 1 |
| 10 | 0.18813  | C | 1 |
| 7  | 0.401747 | I | 0 |
| 1  | 0.269608 | C | 1 |
| 15 | 0.599951 | C | 1 |
| 22 | 0.761753 | C | 1 |
| 24 | 0.310582 | F | 0 |
| 1  | 0.269608 | C | 1 |
| 13 | 0.483533 | C | 1 |
| 10 | 0.472115 | C | 1 |
| 1  | 0.489218 | C | 1 |
| 6  | 0.594365 | C | 1 |
| 23 | 0.668943 | C | 1 |
| 22 | 0.761753 | C | 1 |
| 10 | 0.167482 | I | 0 |
| 9  | 0.507217 | C | 1 |
| 10 | 0.684871 | C | 1 |
| 5  | 0.441311 | C | 1 |

|    |          |   |   |
|----|----------|---|---|
| 6  | 0.663348 | C | 1 |
| 24 | 0.633121 | S | 0 |
| 7  | 0.195259 | C | 1 |
| 23 | 0.668943 | C | 1 |
| 10 | 0.353559 | C | 1 |
| 15 | 0.599951 | C | 1 |
| 23 | 0.668943 | C | 1 |
| 5  | 0.532275 | C | 1 |
| 20 | 0.684777 | C | 1 |
| 24 | 0.186046 | F | 0 |
| 24 | 0.633121 | S | 0 |
| 23 | 0.861665 | F | 0 |
| 20 | 0.502777 | C | 1 |
| 7  | 0.688024 | F | 0 |
| 24 | 0.633121 | S | 0 |
| 24 | 0.100181 | F | 0 |
| 7  | 0.502719 | C | 1 |
| 6  | 0.103882 | C | 1 |
| 5  | 0.387012 | C | 1 |
| 6  | 0.663348 | C | 1 |
| 5  | 0.532275 | C | 1 |
| 10 | 0.684871 | C | 1 |
| 10 | 0.552854 | C | 1 |
| 24 | 0.633121 | S | 0 |
| 6  | 0.379824 | C | 1 |
| 7  | 0.702046 | C | 1 |
| 24 | 0.100181 | F | 0 |
| 15 | 0.599951 | C | 1 |
| 10 | 0.150496 | C | 1 |
| 7  | 0.441878 | C | 1 |
| 19 | 0.790469 | F | 0 |
| 6  | 0.175604 | C | 1 |
| 6  | 0.175604 | C | 1 |
| 6  | 0.175604 | C | 1 |
| 10 | 0.834541 | E | 1 |
| 20 | 0.502777 | C | 1 |
| 7  | 0.145377 | C | 1 |
| 10 | 0.286771 | C | 1 |
| 11 | 0.489289 | C | 1 |
| 23 | 0.668943 | C | 1 |
| 10 | 0.353559 | C | 1 |
| 9  | 0.24529  | C | 1 |
| 10 | 0.583593 | C | 1 |
| 7  | 0.688024 | F | 0 |
| 9  | 0.399031 | C | 1 |
| 1  | 0.302129 | F | 0 |
| 23 | 0.668943 | C | 1 |
| 8  | 0.602263 | K | 1 |
| 5  | 0.068284 | I | 0 |
| 7  | 0.566398 | E | 1 |
| 2  | 0.579692 | E | 1 |
| 1  | 0.39667  | I | 0 |
| 2  | 0.602604 | C | 1 |
| 11 | 0.705592 | C | 1 |

|    |          |   |   |
|----|----------|---|---|
| 7  | 0.486291 | C | 1 |
| 1  | 0.509687 | C | 1 |
| 7  | 0.145377 | C | 1 |
| 7  | 0.538428 | C | 1 |
| 5  | 0.387012 | C | 1 |
| 16 | 0.386903 | C | 1 |
| 10 | 0.353559 | C | 1 |
| 5  | 0.377    | C | 1 |
| 5  | 0.532275 | C | 1 |
| 2  | 0.602604 | C | 1 |
| 23 | 0.668943 | C | 1 |
| 11 | 0.705592 | C | 1 |
| 23 | 0.600067 | D | 1 |
| 20 | 0.502777 | C | 1 |
| 10 | 0.18813  | C | 1 |
| 2  | 0.43718  | C | 1 |
| 8  | 0.248818 | C | 1 |
| 23 | 0.818492 | C | 1 |
| 7  | 0.360822 | C | 1 |
| 7  | 0.51699  | I | 0 |
| 23 | 0.537705 | I | 0 |
| 1  | 0.32559  | C | 1 |
| 6  | 0.122899 | C | 1 |
| 7  | 0.360822 | C | 1 |
| 17 | 0.374845 | C | 1 |
| 23 | 0.668943 | C | 1 |
| 24 | 0.652011 | C | 1 |
| 7  | 0.243965 | C | 1 |
| 23 | 0.600067 | D | 1 |
| 6  | 0.468501 | C | 1 |
| 10 | 0.150496 | C | 1 |
| 8  | 0.591505 | C | 1 |
| 5  | 0.532275 | C | 1 |
| 5  | 0.351082 | C | 1 |
| 9  | 0.505574 | C | 1 |
| 24 | 0.186046 | F | 0 |
| 6  | 0.558815 | C | 1 |
| 22 | 0.511848 | C | 1 |
| 6  | 0.663348 | C | 1 |
| 5  | 0.298252 | C | 1 |
| 7  | 0.478675 | C | 1 |
| 7  | 0.482074 | C | 1 |
| 7  | 0.478675 | C | 1 |
| 15 | 0.599951 | C | 1 |
| 7  | 0.113059 | C | 1 |
| 7  | 0.478675 | C | 1 |
| 10 | 0.176405 | C | 1 |
| 6  | 0.763765 | C | 1 |
| 9  | 0.183916 | C | 1 |
| 24 | 0.310582 | F | 0 |
| 7  | 0.392225 | C | 1 |
| 3  | 0.144589 | C | 1 |
| 13 | 0.483533 | C | 1 |
| 3  | 0.379041 | C | 1 |

|    |          |   |   |
|----|----------|---|---|
| 16 | 0.386903 | C | 1 |
| 23 | 0.668943 | C | 1 |
| 7  | 0.243965 | C | 1 |
| 17 | 0.610373 | C | 1 |
| 13 | 0.483533 | C | 1 |
| 5  | 0.532275 | C | 1 |
| 7  | 0.243965 | C | 1 |
| 7  | 0.243965 | C | 1 |
| 6  | 0.58163  | C | 1 |
| 22 | 0.511848 | C | 1 |
| 1  | 0.460545 | C | 1 |
| 7  | 0.482074 | C | 1 |
| 10 | 0.684871 | C | 1 |
| 5  | 0.441311 | C | 1 |
| 7  | 0.243965 | C | 1 |
| 20 | 0.610299 | C | 1 |
| 15 | 0.599951 | C | 1 |
| 6  | 0.330927 | C | 1 |
| 6  | 0.346622 | C | 1 |
| 10 | 0.150496 | C | 1 |
| 7  | 0.481227 | C | 1 |
| 7  | 0.645108 | C | 1 |
| 3  | 0.322534 | C | 1 |
| 23 | 0.668943 | C | 1 |
| 7  | 0.481227 | C | 1 |
| 6  | 0.763765 | C | 1 |
| 10 | 0.176405 | C | 1 |
| 6  | 0.137649 | I | 0 |
| 2  | 0.579692 | E | 1 |
| 6  | 0.175604 | C | 1 |
| 22 | 0.761753 | C | 1 |
| 7  | 0.481227 | C | 1 |
| 7  | 0.162803 | C | 1 |
| 7  | 0.482074 | C | 1 |
| 5  | 0.532275 | C | 1 |
| 13 | 0.483533 | C | 1 |
| 2  | 0.721056 | K | 1 |
| 7  | 0.335725 | C | 1 |
| 6  | 0.352464 | C | 1 |
| 8  | 0.602263 | K | 1 |
| 7  | 0.195259 | C | 1 |
| 1  | 0.210999 | C | 1 |
| 7  | 0.538428 | C | 1 |
| 7  | 0.482074 | C | 1 |
| 5  | 0.532275 | C | 1 |
| 7  | 0.367149 | C | 1 |
| 7  | 0.367149 | C | 1 |
| 5  | 0.387012 | C | 1 |
| 7  | 0.367149 | C | 1 |
| 1  | 0.419437 | C | 1 |
| 24 | 0.633121 | S | 0 |
| 1  | 0.271124 | I | 0 |
| 2  | 0.579692 | E | 1 |
| 7  | 0.367149 | C | 1 |

|    |          |   |   |
|----|----------|---|---|
| 7  | 0.162803 | C | 1 |
| 15 | 0.599951 | C | 1 |
| 7  | 0.162803 | C | 1 |
| 23 | 0.861665 | F | 0 |
| 1  | 0.260451 | C | 1 |
| 7  | 0.392225 | C | 1 |
| 7  | 0.645108 | C | 1 |
| 8  | 0.591505 | C | 1 |
| 10 | 0.552854 | C | 1 |
| 7  | 0.243965 | C | 1 |
| 2  | 0.698981 | C | 1 |
| 15 | 0.599951 | C | 1 |
| 20 | 0.502777 | C | 1 |
| 7  | 0.538428 | C | 1 |
| 10 | 0.167482 | I | 0 |
| 24 | 0.186046 | F | 0 |
| 7  | 0.538428 | C | 1 |
| 2  | 0.398601 | C | 1 |
| 24 | 0.652011 | C | 1 |
| 10 | 0.472115 | C | 1 |
| 6  | 0.401945 | I | 0 |
| 7  | 0.478675 | C | 1 |
| 7  | 0.538428 | C | 1 |
| 7  | 0.566398 | E | 1 |
| 6  | 0.663348 | C | 1 |
| 3  | 0.322534 | C | 1 |
| 1  | 0.406321 | C | 1 |
| 11 | 0.705592 | C | 1 |
| 1  | 0.260451 | C | 1 |
| 24 | 0.100181 | F | 0 |
| 7  | 0.145377 | C | 1 |
| 10 | 0.552854 | C | 1 |
| 23 | 0.668943 | C | 1 |
| 6  | 0.412065 | L | 0 |
| 20 | 0.684777 | C | 1 |
| 6  | 0.175604 | C | 1 |
| 17 | 0.374845 | C | 1 |
| 10 | 0.567712 | C | 1 |
| 23 | 0.668943 | C | 1 |
| 1  | 0.460545 | C | 1 |
| 20 | 0.684777 | C | 1 |
| 23 | 0.668943 | C | 1 |
| 10 | 0.583593 | C | 1 |
| 6  | 0.663348 | C | 1 |
| 2  | 0.194379 | I | 0 |
| 23 | 0.668943 | C | 1 |
| 6  | 0.763765 | C | 1 |
| 7  | 0.195259 | C | 1 |
| 7  | 0.195259 | C | 1 |
| 7  | 0.645108 | C | 1 |
| 10 | 0.286771 | C | 1 |
| 9  | 0.399031 | C | 1 |
| 6  | 0.663348 | C | 1 |
| 22 | 0.511848 | C | 1 |

|    |          |   |   |
|----|----------|---|---|
| 24 | 0.55057  | C | 1 |
| 1  | 0.441054 | C | 1 |
| 7  | 0.538428 | C | 1 |
| 8  | 0.647679 | I | 0 |
| 16 | 0.386903 | C | 1 |
| 1  | 0.194007 | C | 1 |
| 8  | 0.278296 | M | 0 |
| 1  | 0.260451 | C | 1 |
| 7  | 0.301164 | C | 1 |
| 10 | 0.552854 | C | 1 |
| 7  | 0.486291 | C | 1 |
| 2  | 0.274189 | C | 1 |
| 7  | 0.145377 | C | 1 |
| 7  | 0.131826 | C | 1 |
| 5  | 0.387012 | C | 1 |
| 7  | 0.367149 | C | 1 |
| 23 | 0.668943 | C | 1 |
| 8  | 0.248818 | C | 1 |
| 8  | 0.591505 | C | 1 |
| 24 | 0.679887 | D | 1 |
| 6  | 0.137649 | I | 0 |
| 23 | 0.668943 | C | 1 |
| 6  | 0.663348 | C | 1 |
| 6  | 0.103882 | C | 1 |
| 9  | 0.505574 | C | 1 |
| 6  | 0.663348 | C | 1 |
| 2  | 0.579692 | E | 1 |
| 1  | 0.509687 | C | 1 |
| 7  | 0.243965 | C | 1 |
| 6  | 0.330927 | C | 1 |
| 7  | 0.51699  | I | 0 |
| 23 | 0.668943 | C | 1 |
| 7  | 0.288565 | I | 0 |
| 10 | 0.552854 | C | 1 |
| 7  | 0.335725 | C | 1 |
| 7  | 0.390658 | I | 0 |
| 7  | 0.456612 | I | 0 |
| 7  | 0.392225 | C | 1 |
| 7  | 0.596872 | F | 0 |
| 16 | 0.386903 | C | 1 |
| 5  | 0.377    | C | 1 |
| 10 | 0.18813  | C | 1 |
| 6  | 0.763765 | C | 1 |
| 7  | 0.405427 | C | 1 |
| 10 | 0.176405 | C | 1 |
| 7  | 0.312569 | I | 0 |
| 2  | 0.43718  | C | 1 |
| 2  | 0.698981 | C | 1 |
| 7  | 0.392225 | C | 1 |
| 15 | 0.599951 | C | 1 |
| 10 | 0.286771 | C | 1 |
| 7  | 0.392225 | C | 1 |
| 7  | 0.392225 | C | 1 |
| 1  | 0.39667  | I | 0 |

|    |          |   |   |
|----|----------|---|---|
| 13 | 0.483533 | C | 1 |
| 6  | 0.266735 | C | 1 |
| 2  | 0.698981 | C | 1 |
| 8  | 0.278296 | M | 0 |
| 7  | 0.538428 | C | 1 |
| 13 | 0.483533 | C | 1 |
| 7  | 0.301164 | C | 1 |
| 13 | 0.483533 | C | 1 |
| 2  | 0.579692 | E | 1 |
| 24 | 0.633121 | S | 0 |
| 24 | 0.633121 | S | 0 |
| 23 | 0.861665 | F | 0 |
| 7  | 0.113059 | C | 1 |
| 7  | 0.441878 | C | 1 |
| 10 | 0.684871 | C | 1 |
| 8  | 0.479993 | C | 1 |
| 5  | 0.532275 | C | 1 |
| 7  | 0.478701 | C | 1 |
| 1  | 0.178546 | C | 1 |
| 5  | 0.438549 | I | 0 |
| 7  | 0.441878 | C | 1 |
| 10 | 0.552854 | C | 1 |
| 10 | 0.606626 | C | 1 |
| 8  | 0.662474 | E | 1 |
| 6  | 0.68682  | N | 0 |
| 7  | 0.131826 | C | 1 |
| 6  | 0.594365 | C | 1 |
| 7  | 0.390658 | I | 0 |
| 10 | 0.552854 | C | 1 |
| 17 | 0.374845 | C | 1 |
| 13 | 0.483533 | C | 1 |
| 6  | 0.58163  | C | 1 |
| 13 | 0.483533 | C | 1 |
| 10 | 0.472115 | C | 1 |
| 23 | 0.668943 | C | 1 |
| 24 | 0.633121 | S | 0 |
| 9  | 0.24529  | C | 1 |
| 6  | 0.137649 | I | 0 |
| 7  | 0.645108 | C | 1 |
| 10 | 0.150496 | C | 1 |
| 13 | 0.483533 | C | 1 |
| 23 | 0.668943 | C | 1 |
| 2  | 0.177339 | C | 1 |
| 5  | 0.351082 | C | 1 |
| 7  | 0.645108 | C | 1 |
| 23 | 0.668943 | C | 1 |
| 8  | 0.358124 | C | 1 |
| 23 | 0.668943 | C | 1 |
| 7  | 0.645108 | C | 1 |
| 6  | 0.137649 | I | 0 |
| 7  | 0.702046 | C | 1 |
| 7  | 0.645108 | C | 1 |
| 16 | 0.386903 | C | 1 |
| 6  | 0.468501 | C | 1 |

|    |          |   |   |
|----|----------|---|---|
| 2  | 0.721056 | K | 1 |
| 7  | 0.645108 | C | 1 |
| 2  | 0.398601 | C | 1 |
| 7  | 0.486291 | C | 1 |
| 5  | 0.559303 | C | 1 |
| 24 | 0.633121 | S | 0 |
| 10 | 0.684871 | C | 1 |
| 7  | 0.596872 | F | 0 |
| 5  | 0.438549 | I | 0 |
| 6  | 0.58163  | C | 1 |
| 8  | 0.10283  | C | 1 |
| 16 | 0.386903 | C | 1 |
| 5  | 0.068284 | I | 0 |
| 3  | 0.144589 | C | 1 |
| 6  | 0.330927 | C | 1 |
| 20 | 0.610299 | C | 1 |
| 22 | 0.761753 | C | 1 |
| 5  | 0.438549 | I | 0 |
| 7  | 0.162803 | C | 1 |
| 13 | 0.483533 | C | 1 |
| 15 | 0.599951 | C | 1 |
| 6  | 0.48915  | C | 1 |
| 5  | 0.559303 | C | 1 |
| 10 | 0.552854 | C | 1 |
| 7  | 0.486291 | C | 1 |
| 6  | 0.48915  | C | 1 |
| 10 | 0.353559 | C | 1 |
| 23 | 0.668943 | C | 1 |
| 7  | 0.538428 | C | 1 |
| 1  | 0.489218 | C | 1 |
| 5  | 0.351082 | C | 1 |
| 8  | 0.248818 | C | 1 |
| 7  | 0.596872 | F | 0 |
| 7  | 0.478675 | C | 1 |
| 7  | 0.243965 | C | 1 |
| 20 | 0.448532 | C | 1 |
| 24 | 0.652011 | C | 1 |
| 3  | 0.417669 | C | 1 |
| 22 | 0.511848 | C | 1 |
| 3  | 0.379041 | C | 1 |
| 15 | 0.599951 | C | 1 |
| 24 | 0.186046 | F | 0 |
| 7  | 0.702046 | C | 1 |
| 23 | 0.642835 | C | 1 |
| 5  | 0.441311 | C | 1 |
| 5  | 0.441311 | C | 1 |
| 23 | 0.668943 | C | 1 |
| 7  | 0.482074 | C | 1 |
| 23 | 0.668943 | C | 1 |
| 5  | 0.298252 | C | 1 |
| 17 | 0.374845 | C | 1 |
| 17 | 0.610373 | C | 1 |
| 23 | 0.668943 | C | 1 |
| 5  | 0.450597 | C | 1 |



|    |          |   |   |
|----|----------|---|---|
| 1  | 0.441054 | C | 1 |
| 7  | 0.456612 | I | 0 |
| 10 | 0.684871 | C | 1 |
| 15 | 0.599951 | C | 1 |
| 7  | 0.688024 | F | 0 |
| 7  | 0.456612 | I | 0 |
| 6  | 0.663348 | C | 1 |
| 7  | 0.131826 | C | 1 |
| 24 | 0.652011 | C | 1 |
| 7  | 0.360822 | C | 1 |
| 10 | 0.552854 | C | 1 |
| 15 | 0.599951 | C | 1 |
| 23 | 0.668943 | C | 1 |
| 7  | 0.312569 | I | 0 |
| 23 | 0.668943 | C | 1 |
| 5  | 0.532275 | C | 1 |
| 10 | 0.583593 | C | 1 |
| 6  | 0.175604 | C | 1 |
| 7  | 0.392225 | C | 1 |
| 7  | 0.596872 | F | 0 |
| 24 | 0.679887 | D | 1 |
| 6  | 0.330927 | C | 1 |
| 8  | 0.479993 | C | 1 |
| 10 | 0.176405 | C | 1 |
| 20 | 0.684777 | C | 1 |
| 6  | 0.122899 | C | 1 |
| 10 | 0.176405 | C | 1 |
| 22 | 0.761753 | C | 1 |
| 9  | 0.183916 | C | 1 |
| 17 | 0.374845 | C | 1 |
| 11 | 0.705592 | C | 1 |
| 24 | 0.652011 | C | 1 |
| 10 | 0.286771 | C | 1 |
| 2  | 0.698981 | C | 1 |
| 1  | 0.507279 | E | 1 |
| 1  | 0.271124 | I | 0 |
| 6  | 0.558815 | C | 1 |
| 10 | 0.286771 | C | 1 |
| 1  | 0.302129 | F | 0 |
| 6  | 0.558815 | C | 1 |
| 7  | 0.243965 | C | 1 |
| 10 | 0.834541 | E | 1 |
| 24 | 0.310582 | F | 0 |
| 1  | 0.271124 | I | 0 |
| 6  | 0.137649 | I | 0 |
| 10 | 0.552854 | C | 1 |
| 2  | 0.398601 | C | 1 |
| 7  | 0.367149 | C | 1 |
| 2  | 0.602604 | C | 1 |
| 3  | 0.322534 | C | 1 |
| 1  | 0.302129 | F | 0 |
| 24 | 0.633121 | S | 0 |
| 1  | 0.271124 | I | 0 |
| 1  | 0.490981 | C | 1 |

|    |          |   |   |
|----|----------|---|---|
| 7  | 0.432318 | G | 0 |
| 3  | 0.379041 | C | 1 |
| 23 | 0.668943 | C | 1 |
| 24 | 0.652011 | C | 1 |
| 24 | 0.310582 | F | 0 |
| 6  | 0.48915  | C | 1 |
| 10 | 0.583593 | C | 1 |
| 7  | 0.367149 | C | 1 |
| 7  | 0.243965 | C | 1 |
| 23 | 0.160336 | C | 1 |
| 10 | 0.583593 | C | 1 |
| 1  | 0.324905 | C | 1 |
| 6  | 0.412065 | L | 0 |
| 20 | 0.502777 | C | 1 |
| 10 | 0.834541 | E | 1 |
| 6  | 0.663348 | C | 1 |
| 24 | 0.652011 | C | 1 |
| 23 | 0.668943 | C | 1 |
| 8  | 0.479993 | C | 1 |
| 24 | 0.55057  | C | 1 |
| 23 | 0.668943 | C | 1 |
| 19 | 0.790469 | F | 0 |
| 7  | 0.481227 | C | 1 |
| 23 | 0.537705 | I | 0 |
| 5  | 0.450597 | C | 1 |
| 20 | 0.684777 | C | 1 |
| 5  | 0.377    | C | 1 |
| 6  | 0.58163  | C | 1 |
| 23 | 0.668943 | C | 1 |
| 24 | 0.633121 | S | 0 |
| 1  | 0.178546 | C | 1 |
| 6  | 0.443207 | E | 1 |
| 24 | 0.633121 | S | 0 |
| 1  | 0.210999 | C | 1 |
| 6  | 0.68682  | N | 0 |
| 24 | 0.633121 | S | 0 |
| 15 | 0.599951 | C | 1 |
| 16 | 0.386903 | C | 1 |
| 5  | 0.450597 | C | 1 |
| 7  | 0.301164 | C | 1 |
| 24 | 0.55057  | C | 1 |
| 11 | 0.705592 | C | 1 |
| 1  | 0.507279 | E | 1 |
| 10 | 0.150496 | C | 1 |
| 6  | 0.468501 | C | 1 |
| 24 | 0.633121 | S | 0 |
| 8  | 0.248818 | C | 1 |
| 2  | 0.398601 | C | 1 |
| 11 | 0.705592 | C | 1 |
| 23 | 0.537705 | I | 0 |
| 7  | 0.566398 | E | 1 |
| 11 | 0.705592 | C | 1 |
| 23 | 0.668943 | C | 1 |
| 7  | 0.432318 | G | 0 |

|    |          |   |   |
|----|----------|---|---|
| 17 | 0.610373 | C | 1 |
| 6  | 0.266735 | C | 1 |
| 18 | 0.74455  | E | 1 |
| 7  | 0.482074 | C | 1 |
| 7  | 0.481227 | C | 1 |
| 12 | 0.540903 | E | 1 |
| 6  | 0.412065 | L | 0 |
| 22 | 0.511848 | C | 1 |
| 23 | 0.668943 | C | 1 |
| 2  | 0.43718  | C | 1 |
| 7  | 0.502719 | C | 1 |
| 7  | 0.131826 | C | 1 |
| 6  | 0.594365 | C | 1 |
| 23 | 0.642835 | C | 1 |
| 24 | 0.652011 | C | 1 |
| 7  | 0.335725 | C | 1 |
| 9  | 0.24529  | C | 1 |
| 2  | 0.602604 | C | 1 |
| 9  | 0.24529  | C | 1 |
| 9  | 0.24529  | C | 1 |
| 9  | 0.505574 | C | 1 |
| 15 | 0.599951 | C | 1 |
| 6  | 0.352464 | C | 1 |
| 20 | 0.502777 | C | 1 |
| 7  | 0.456612 | I | 0 |
| 6  | 0.330927 | C | 1 |
| 13 | 0.483533 | C | 1 |
| 7  | 0.702046 | C | 1 |
| 6  | 0.663348 | C | 1 |
| 23 | 0.861665 | F | 0 |
| 8  | 0.10283  | C | 1 |
| 15 | 0.599951 | C | 1 |
| 5  | 0.387012 | C | 1 |
| 23 | 0.668943 | C | 1 |
| 21 | 0.575245 | C | 1 |
| 13 | 0.483533 | C | 1 |
| 10 | 0.583593 | C | 1 |
| 1  | 0.5435   | E | 1 |
| 7  | 0.335725 | C | 1 |
| 20 | 0.698911 | K | 1 |
| 5  | 0.532275 | C | 1 |
| 23 | 0.668943 | C | 1 |
| 13 | 0.483533 | C | 1 |
| 3  | 0.417669 | C | 1 |
| 10 | 0.606626 | C | 1 |
| 20 | 0.502777 | C | 1 |
| 23 | 0.668943 | C | 1 |
| 5  | 0.298252 | C | 1 |
| 15 | 0.599951 | C | 1 |
| 8  | 0.10283  | C | 1 |
| 5  | 0.441311 | C | 1 |
| 6  | 0.48915  | C | 1 |
| 9  | 0.153652 | C | 1 |
| 2  | 0.177339 | C | 1 |

|    |          |   |   |
|----|----------|---|---|
| 20 | 0.610299 | C | 1 |
| 23 | 0.668943 | C | 1 |
| 15 | 0.599951 | C | 1 |
| 15 | 0.599951 | C | 1 |
| 24 | 0.652011 | C | 1 |
| 6  | 0.412065 | L | 0 |
| 9  | 0.507217 | C | 1 |
| 7  | 0.195259 | C | 1 |
| 10 | 0.472115 | C | 1 |
| 6  | 0.58163  | C | 1 |
| 7  | 0.392225 | C | 1 |
| 20 | 0.448532 | C | 1 |
| 2  | 0.177339 | C | 1 |
| 1  | 0.5435   | E | 1 |
| 7  | 0.243965 | C | 1 |
| 11 | 0.489289 | C | 1 |
| 1  | 0.269608 | C | 1 |
| 10 | 0.606626 | C | 1 |
| 23 | 0.160336 | C | 1 |
| 1  | 0.406321 | C | 1 |
| 7  | 0.702046 | C | 1 |
| 23 | 0.642835 | C | 1 |
| 9  | 0.505574 | C | 1 |
| 17 | 0.610373 | C | 1 |
| 9  | 0.505574 | C | 1 |
| 9  | 0.505574 | C | 1 |
| 9  | 0.505574 | C | 1 |
| 8  | 0.278296 | M | 0 |
| 16 | 0.386903 | C | 1 |
| 20 | 0.502777 | C | 1 |
| 6  | 0.330927 | C | 1 |
| 5  | 0.559303 | C | 1 |
| 23 | 0.600067 | D | 1 |
| 7  | 0.502719 | C | 1 |
| 13 | 0.483533 | C | 1 |
| 6  | 0.663348 | C | 1 |
| 6  | 0.58163  | C | 1 |
| 5  | 0.351082 | C | 1 |
| 20 | 0.698911 | K | 1 |
| 2  | 0.194379 | I | 0 |
| 8  | 0.248818 | C | 1 |
| 7  | 0.482074 | C | 1 |
| 6  | 0.468501 | C | 1 |
| 10 | 0.286771 | C | 1 |
| 7  | 0.51699  | I | 0 |
| 23 | 0.668943 | C | 1 |
| 9  | 0.505574 | C | 1 |
| 6  | 0.352464 | C | 1 |
| 24 | 0.652011 | C | 1 |
| 20 | 0.698911 | K | 1 |
| 2  | 0.274189 | C | 1 |
| 7  | 0.401747 | I | 0 |
| 6  | 0.412065 | L | 0 |
| 6  | 0.48915  | C | 1 |

|    |          |   |   |
|----|----------|---|---|
| 6  | 0.411561 | I | 0 |
| 9  | 0.271907 | I | 0 |
| 10 | 0.167482 | I | 0 |
| 15 | 0.599951 | C | 1 |
| 10 | 0.834541 | E | 1 |
| 6  | 0.763765 | C | 1 |
| 7  | 0.478701 | C | 1 |
| 7  | 0.131826 | C | 1 |
| 8  | 0.278296 | M | 0 |
| 20 | 0.448532 | C | 1 |
| 23 | 0.537705 | I | 0 |
| 15 | 0.599951 | C | 1 |
| 1  | 0.194007 | C | 1 |
| 7  | 0.702046 | C | 1 |
| 2  | 0.194379 | I | 0 |
| 5  | 0.438549 | I | 0 |
| 6  | 0.401945 | I | 0 |
| 5  | 0.532275 | C | 1 |
| 23 | 0.861665 | F | 0 |
| 24 | 0.633121 | S | 0 |
| 2  | 0.398601 | C | 1 |
| 6  | 0.468501 | C | 1 |
| 2  | 0.43718  | C | 1 |
| 1  | 0.59178  | C | 1 |
| 20 | 0.610299 | C | 1 |
| 7  | 0.195259 | C | 1 |
| 8  | 0.278296 | M | 0 |
| 6  | 0.468501 | C | 1 |
| 17 | 0.374845 | C | 1 |
| 23 | 0.668943 | C | 1 |
| 1  | 0.460545 | C | 1 |
| 5  | 0.298252 | C | 1 |
| 16 | 0.386903 | C | 1 |
| 5  | 0.377    | C | 1 |
| 1  | 0.39667  | I | 0 |
| 7  | 0.688024 | F | 0 |
| 6  | 0.594365 | C | 1 |
| 6  | 0.411561 | I | 0 |
| 22 | 0.511848 | C | 1 |
| 24 | 0.100181 | F | 0 |
| 24 | 0.633121 | S | 0 |
| 5  | 0.438549 | I | 0 |
| 23 | 0.668943 | C | 1 |
| 1  | 0.489218 | C | 1 |
| 5  | 0.532275 | C | 1 |
| 10 | 0.606626 | C | 1 |
| 6  | 0.330927 | C | 1 |
| 5  | 0.532275 | C | 1 |
| 17 | 0.610373 | C | 1 |
| 9  | 0.399031 | C | 1 |
| 20 | 0.502777 | C | 1 |
| 20 | 0.684777 | C | 1 |
| 7  | 0.392225 | C | 1 |
| 24 | 0.55057  | C | 1 |

|    |          |   |   |
|----|----------|---|---|
| 11 | 0.489289 | C | 1 |
| 6  | 0.443207 | E | 1 |
| 20 | 0.698911 | K | 1 |
| 24 | 0.633121 | S | 0 |
| 18 | 0.74455  | E | 1 |
| 1  | 0.406321 | C | 1 |
| 6  | 0.330927 | C | 1 |
| 17 | 0.374845 | C | 1 |
| 7  | 0.312569 | I | 0 |
| 5  | 0.532275 | C | 1 |
| 10 | 0.167482 | I | 0 |
| 6  | 0.266735 | C | 1 |
| 24 | 0.633121 | S | 0 |
| 20 | 0.477586 | F | 0 |
| 6  | 0.763765 | C | 1 |
| 7  | 0.688024 | F | 0 |
| 2  | 0.602604 | C | 1 |
| 2  | 0.602604 | C | 1 |
| 23 | 0.668943 | C | 1 |
| 7  | 0.367149 | C | 1 |
| 1  | 0.111323 | C | 1 |
| 1  | 0.5435   | E | 1 |
| 20 | 0.502777 | C | 1 |
| 15 | 0.599951 | C | 1 |
| 6  | 0.266735 | C | 1 |
| 24 | 0.652011 | C | 1 |
| 10 | 0.684871 | C | 1 |
| 23 | 0.668943 | C | 1 |
| 7  | 0.405427 | C | 1 |
| 2  | 0.698981 | C | 1 |
| 7  | 0.456612 | I | 0 |
| 1  | 0.679348 | E | 1 |
| 23 | 0.668943 | C | 1 |
| 19 | 0.790469 | F | 0 |
| 8  | 0.358124 | C | 1 |
| 1  | 0.194007 | C | 1 |
| 15 | 0.599951 | C | 1 |
| 8  | 0.248818 | C | 1 |
| 10 | 0.472115 | C | 1 |
| 24 | 0.55057  | C | 1 |
| 1  | 0.39667  | I | 0 |
| 1  | 0.59178  | C | 1 |
| 10 | 0.176405 | C | 1 |
| 1  | 0.490981 | C | 1 |
| 10 | 0.176405 | C | 1 |
| 5  | 0.532275 | C | 1 |
| 19 | 0.790469 | F | 0 |
| 7  | 0.288565 | I | 0 |
| 20 | 0.502777 | C | 1 |
| 2  | 0.446364 | E | 1 |
| 15 | 0.599951 | C | 1 |
| 10 | 0.176405 | C | 1 |
| 5  | 0.450597 | C | 1 |
| 23 | 0.668943 | C | 1 |

|    |          |   |   |
|----|----------|---|---|
| 10 | 0.167482 | I | 0 |
| 24 | 0.633121 | S | 0 |
| 15 | 0.599951 | C | 1 |
| 7  | 0.688024 | F | 0 |
| 1  | 0.489218 | C | 1 |
| 5  | 0.259266 | I | 0 |
| 3  | 0.322534 | C | 1 |
| 5  | 0.068284 | I | 0 |
| 15 | 0.599951 | C | 1 |
| 20 | 0.698911 | K | 1 |
| 20 | 0.502777 | C | 1 |
| 7  | 0.486291 | C | 1 |
| 18 | 0.74455  | E | 1 |
| 8  | 0.602263 | K | 1 |
| 6  | 0.122899 | C | 1 |
| 2  | 0.43718  | C | 1 |
| 7  | 0.360822 | C | 1 |
| 10 | 0.684871 | C | 1 |
| 24 | 0.633121 | S | 0 |
| 21 | 0.575245 | C | 1 |
| 23 | 0.668943 | C | 1 |
| 20 | 0.448532 | C | 1 |
| 18 | 0.74455  | E | 1 |
| 10 | 0.684871 | C | 1 |
| 7  | 0.441878 | C | 1 |
| 24 | 0.633121 | S | 0 |
| 7  | 0.432318 | G | 0 |
| 6  | 0.330927 | C | 1 |
| 20 | 0.610299 | C | 1 |
| 9  | 0.507217 | C | 1 |
| 9  | 0.505574 | C | 1 |
| 8  | 0.278296 | M | 0 |
| 7  | 0.482074 | C | 1 |
| 24 | 0.652011 | C | 1 |
| 1  | 0.260451 | C | 1 |
| 1  | 0.460545 | C | 1 |
| 7  | 0.502719 | C | 1 |
| 24 | 0.652011 | C | 1 |
| 6  | 0.58163  | C | 1 |
| 6  | 0.663348 | C | 1 |
| 7  | 0.401747 | I | 0 |
| 24 | 0.679887 | D | 1 |
| 7  | 0.645108 | C | 1 |
| 12 | 0.540903 | E | 1 |
| 6  | 0.103882 | C | 1 |
| 7  | 0.566398 | E | 1 |
| 2  | 0.721056 | K | 1 |
| 20 | 0.448532 | C | 1 |
| 9  | 0.153652 | C | 1 |
| 2  | 0.43718  | C | 1 |
| 1  | 0.441054 | C | 1 |
| 10 | 0.18813  | C | 1 |
| 24 | 0.633121 | S | 0 |
| 16 | 0.386903 | C | 1 |

|    |          |   |   |
|----|----------|---|---|
| 10 | 0.353559 | C | 1 |
| 23 | 0.668943 | C | 1 |
| 2  | 0.177339 | C | 1 |
| 1  | 0.406321 | C | 1 |
| 8  | 0.10283  | C | 1 |
| 23 | 0.668943 | C | 1 |
| 7  | 0.243965 | C | 1 |
| 7  | 0.367149 | C | 1 |
| 23 | 0.668943 | C | 1 |
| 6  | 0.763765 | C | 1 |
| 7  | 0.486291 | C | 1 |
| 5  | 0.438549 | I | 0 |
| 6  | 0.763765 | C | 1 |
| 9  | 0.183916 | C | 1 |
| 1  | 0.419437 | C | 1 |
| 6  | 0.68682  | N | 0 |
| 3  | 0.379041 | C | 1 |
| 7  | 0.645108 | C | 1 |
| 1  | 0.111323 | C | 1 |
| 3  | 0.379041 | C | 1 |
| 1  | 0.59178  | C | 1 |
| 6  | 0.411561 | I | 0 |
| 1  | 0.260451 | C | 1 |
| 7  | 0.441878 | C | 1 |
| 23 | 0.668943 | C | 1 |
| 7  | 0.482074 | C | 1 |
| 19 | 0.790469 | F | 0 |
| 15 | 0.599951 | C | 1 |
| 10 | 0.684871 | C | 1 |
| 10 | 0.150496 | C | 1 |
| 5  | 0.438549 | I | 0 |
| 1  | 0.679348 | E | 1 |
| 10 | 0.583593 | C | 1 |
| 10 | 0.684871 | C | 1 |
| 7  | 0.456612 | I | 0 |
| 16 | 0.386903 | C | 1 |
| 20 | 0.684777 | C | 1 |
| 6  | 0.663348 | C | 1 |
| 1  | 0.490981 | C | 1 |
| 8  | 0.278296 | M | 0 |
| 7  | 0.478675 | C | 1 |
| 7  | 0.405427 | C | 1 |
| 9  | 0.271907 | I | 0 |
| 6  | 0.468501 | C | 1 |
| 10 | 0.583593 | C | 1 |
| 10 | 0.167482 | I | 0 |
| 11 | 0.705592 | C | 1 |
| 5  | 0.351082 | C | 1 |
| 11 | 0.705592 | C | 1 |
| 8  | 0.10283  | C | 1 |
| 7  | 0.688024 | F | 0 |
| 2  | 0.721056 | K | 1 |
| 5  | 0.387012 | C | 1 |
| 5  | 0.298252 | C | 1 |



|    |          |   |   |
|----|----------|---|---|
| 7  | 0.702046 | C | 1 |
| 6  | 0.68682  | N | 0 |
| 1  | 0.441054 | C | 1 |
| 7  | 0.335725 | C | 1 |
| 1  | 0.441054 | C | 1 |
| 21 | 0.575245 | C | 1 |
| 7  | 0.478675 | C | 1 |
| 23 | 0.642835 | C | 1 |
| 2  | 0.602604 | C | 1 |
| 7  | 0.566398 | E | 1 |
| 20 | 0.610299 | C | 1 |
| 8  | 0.479993 | C | 1 |
| 10 | 0.834541 | E | 1 |
| 9  | 0.183916 | C | 1 |
| 6  | 0.663348 | C | 1 |
| 8  | 0.358124 | C | 1 |
| 10 | 0.834541 | E | 1 |
| 22 | 0.511848 | C | 1 |
| 8  | 0.278296 | M | 0 |
| 20 | 0.448532 | C | 1 |
| 15 | 0.599951 | C | 1 |
| 10 | 0.286771 | C | 1 |
| 24 | 0.633121 | S | 0 |
| 10 | 0.834541 | E | 1 |
| 5  | 0.532275 | C | 1 |
| 24 | 0.633121 | S | 0 |
| 7  | 0.478701 | C | 1 |
| 8  | 0.358124 | C | 1 |
| 23 | 0.818492 | C | 1 |
| 15 | 0.599951 | C | 1 |
| 17 | 0.374845 | C | 1 |
| 10 | 0.150496 | C | 1 |
| 22 | 0.761753 | C | 1 |
| 7  | 0.502719 | C | 1 |
| 8  | 0.248818 | C | 1 |
| 8  | 0.248818 | C | 1 |
| 6  | 0.411561 | I | 0 |
| 11 | 0.705592 | C | 1 |
| 7  | 0.645108 | C | 1 |
| 2  | 0.274189 | C | 1 |
| 3  | 0.322534 | C | 1 |
| 6  | 0.558815 | C | 1 |
| 6  | 0.594365 | C | 1 |
| 10 | 0.353559 | C | 1 |
| 10 | 0.552854 | C | 1 |
| 7  | 0.401747 | I | 0 |
| 7  | 0.360822 | C | 1 |
| 17 | 0.610373 | C | 1 |
| 2  | 0.721056 | K | 1 |
| 1  | 0.441054 | C | 1 |
| 5  | 0.559303 | C | 1 |
| 7  | 0.113059 | C | 1 |
| 9  | 0.505574 | C | 1 |
| 17 | 0.374845 | C | 1 |

|    |          |   |   |
|----|----------|---|---|
| 1  | 0.59178  | C | 1 |
| 7  | 0.481227 | C | 1 |
| 7  | 0.367149 | C | 1 |
| 16 | 0.386903 | C | 1 |
| 17 | 0.374845 | C | 1 |
| 6  | 0.379824 | C | 1 |
| 7  | 0.131826 | C | 1 |
| 17 | 0.610373 | C | 1 |
| 7  | 0.113059 | C | 1 |
| 6  | 0.763765 | C | 1 |
| 7  | 0.068284 | C | 1 |
| 7  | 0.482074 | C | 1 |
| 6  | 0.558815 | C | 1 |
| 20 | 0.698911 | K | 1 |
| 13 | 0.483533 | C | 1 |
| 7  | 0.392225 | C | 1 |
| 22 | 0.511848 | C | 1 |
| 7  | 0.478701 | C | 1 |
| 24 | 0.186046 | F | 0 |
| 23 | 0.642835 | C | 1 |
| 17 | 0.610373 | C | 1 |
| 1  | 0.32559  | C | 1 |
| 5  | 0.387012 | C | 1 |
| 7  | 0.367149 | C | 1 |
| 6  | 0.586834 | L | 0 |
| 5  | 0.532275 | C | 1 |
| 8  | 0.10283  | C | 1 |
| 24 | 0.652011 | C | 1 |
| 23 | 0.668943 | C | 1 |
| 8  | 0.591505 | C | 1 |
| 9  | 0.24529  | C | 1 |
| 7  | 0.367149 | C | 1 |
| 1  | 0.269608 | C | 1 |
| 6  | 0.468501 | C | 1 |
| 6  | 0.586834 | L | 0 |
| 7  | 0.301164 | C | 1 |
| 20 | 0.448532 | C | 1 |
| 6  | 0.379824 | C | 1 |
| 7  | 0.33563  | C | 1 |
| 23 | 0.668943 | C | 1 |
| 8  | 0.591505 | C | 1 |
| 6  | 0.68682  | N | 0 |
| 23 | 0.537705 | I | 0 |
| 7  | 0.360822 | C | 1 |
| 13 | 0.483533 | C | 1 |
| 3  | 0.417669 | C | 1 |
| 8  | 0.602263 | K | 1 |
| 23 | 0.160336 | C | 1 |
| 6  | 0.352464 | C | 1 |
| 24 | 0.55057  | C | 1 |
| 9  | 0.507217 | C | 1 |
| 1  | 0.260451 | C | 1 |
| 6  | 0.468501 | C | 1 |
| 2  | 0.721056 | K | 1 |

|    |          |   |   |
|----|----------|---|---|
| 20 | 0.684777 | C | 1 |
| 2  | 0.721056 | K | 1 |
| 10 | 0.176405 | C | 1 |
| 23 | 0.160336 | C | 1 |
| 13 | 0.483533 | C | 1 |
| 7  | 0.482074 | C | 1 |
| 22 | 0.511848 | C | 1 |
| 6  | 0.103882 | C | 1 |
| 10 | 0.353559 | C | 1 |
| 6  | 0.558815 | C | 1 |
| 6  | 0.663348 | C | 1 |
| 9  | 0.505574 | C | 1 |
| 10 | 0.583593 | C | 1 |
| 10 | 0.583593 | C | 1 |
| 2  | 0.43718  | C | 1 |
| 7  | 0.502719 | C | 1 |
| 7  | 0.502719 | C | 1 |
| 9  | 0.399031 | C | 1 |
| 7  | 0.645108 | C | 1 |
| 7  | 0.288565 | I | 0 |
| 6  | 0.266735 | C | 1 |
| 5  | 0.259266 | I | 0 |
| 7  | 0.405427 | C | 1 |
| 24 | 0.633121 | S | 0 |
| 6  | 0.401945 | I | 0 |
| 7  | 0.645108 | C | 1 |
| 7  | 0.482074 | C | 1 |
| 8  | 0.248818 | C | 1 |
| 10 | 0.150496 | C | 1 |
| 23 | 0.600067 | D | 1 |
| 7  | 0.441878 | C | 1 |
| 7  | 0.702046 | C | 1 |
| 7  | 0.288565 | I | 0 |
| 5  | 0.559303 | C | 1 |
| 6  | 0.412065 | L | 0 |
| 1  | 0.324905 | C | 1 |
| 23 | 0.668943 | C | 1 |
| 8  | 0.647679 | I | 0 |
| 7  | 0.688024 | F | 0 |
| 23 | 0.668943 | C | 1 |
| 1  | 0.509687 | C | 1 |
| 7  | 0.405427 | C | 1 |
| 6  | 0.58163  | C | 1 |
| 24 | 0.55057  | C | 1 |
| 17 | 0.610373 | C | 1 |
| 23 | 0.537705 | I | 0 |
| 5  | 0.532275 | C | 1 |
| 23 | 0.642835 | C | 1 |
| 23 | 0.668943 | C | 1 |
| 12 | 0.540903 | E | 1 |
| 7  | 0.33563  | C | 1 |
| 5  | 0.298252 | C | 1 |
| 7  | 0.702046 | C | 1 |
| 7  | 0.367149 | C | 1 |

|    |          |   |   |
|----|----------|---|---|
| 24 | 0.633121 | S | 0 |
| 6  | 0.352464 | C | 1 |
| 2  | 0.446364 | E | 1 |
| 17 | 0.374845 | C | 1 |
| 24 | 0.679887 | D | 1 |
| 1  | 0.490981 | C | 1 |
| 6  | 0.48915  | C | 1 |
| 10 | 0.176405 | C | 1 |
| 7  | 0.441878 | C | 1 |
| 24 | 0.100181 | F | 0 |
| 20 | 0.502777 | C | 1 |
| 21 | 0.575245 | C | 1 |
| 13 | 0.483533 | C | 1 |
| 10 | 0.353559 | C | 1 |
| 7  | 0.478675 | C | 1 |
| 17 | 0.610373 | C | 1 |
| 2  | 0.274189 | C | 1 |
| 6  | 0.175604 | C | 1 |
| 24 | 0.100181 | F | 0 |
| 24 | 0.652011 | C | 1 |
| 11 | 0.705592 | C | 1 |
| 6  | 0.352464 | C | 1 |
| 24 | 0.633121 | S | 0 |
| 5  | 0.068284 | I | 0 |
| 5  | 0.377    | C | 1 |
| 23 | 0.861665 | F | 0 |
| 6  | 0.763765 | C | 1 |
| 24 | 0.633121 | S | 0 |
| 1  | 0.5435   | E | 1 |
| 22 | 0.511848 | C | 1 |
| 7  | 0.478701 | C | 1 |
| 17 | 0.374845 | C | 1 |
| 10 | 0.286771 | C | 1 |
| 24 | 0.633121 | S | 0 |
| 23 | 0.668943 | C | 1 |
| 10 | 0.167482 | I | 0 |
| 7  | 0.195259 | C | 1 |
| 7  | 0.441878 | C | 1 |
| 2  | 0.579692 | E | 1 |
| 7  | 0.243965 | C | 1 |
| 10 | 0.176405 | C | 1 |
| 15 | 0.599951 | C | 1 |
| 17 | 0.374845 | C | 1 |
| 24 | 0.633121 | S | 0 |
| 10 | 0.567712 | C | 1 |
| 7  | 0.566398 | E | 1 |
| 7  | 0.538428 | C | 1 |
| 3  | 0.379041 | C | 1 |
| 7  | 0.301164 | C | 1 |
| 24 | 0.679887 | D | 1 |
| 3  | 0.379041 | C | 1 |
| 24 | 0.652011 | C | 1 |
| 7  | 0.702046 | C | 1 |
| 1  | 0.441054 | C | 1 |

|    |          |   |   |
|----|----------|---|---|
| 8  | 0.602263 | K | 1 |
| 13 | 0.483533 | C | 1 |
| 10 | 0.176405 | C | 1 |
| 7  | 0.390658 | I | 0 |
| 7  | 0.288565 | I | 0 |
| 19 | 0.790469 | F | 0 |
| 17 | 0.374845 | C | 1 |
| 15 | 0.599951 | C | 1 |
| 24 | 0.652011 | C | 1 |
| 6  | 0.68682  | N | 0 |
| 24 | 0.633121 | S | 0 |
| 10 | 0.606626 | C | 1 |
| 23 | 0.668943 | C | 1 |
| 9  | 0.505574 | C | 1 |
| 24 | 0.55057  | C | 1 |
| 7  | 0.312569 | I | 0 |
| 7  | 0.702046 | C | 1 |
| 24 | 0.633121 | S | 0 |
| 15 | 0.599951 | C | 1 |
| 7  | 0.555532 | F | 0 |
| 17 | 0.374845 | C | 1 |
| 5  | 0.532275 | C | 1 |
| 3  | 0.144589 | C | 1 |
| 6  | 0.48915  | C | 1 |
| 7  | 0.702046 | C | 1 |
| 7  | 0.360822 | C | 1 |
| 8  | 0.479993 | C | 1 |
| 3  | 0.379041 | C | 1 |
| 6  | 0.379824 | C | 1 |
| 7  | 0.33563  | C | 1 |
| 1  | 0.458864 | C | 1 |
| 24 | 0.633121 | S | 0 |
| 13 | 0.483533 | C | 1 |
| 24 | 0.186046 | F | 0 |
| 10 | 0.176405 | C | 1 |
| 7  | 0.392225 | C | 1 |
| 24 | 0.633121 | S | 0 |
| 5  | 0.559303 | C | 1 |
| 7  | 0.131826 | C | 1 |
| 23 | 0.668943 | C | 1 |
| 7  | 0.482074 | C | 1 |
| 7  | 0.702046 | C | 1 |
| 7  | 0.645108 | C | 1 |
| 13 | 0.483533 | C | 1 |
| 17 | 0.374845 | C | 1 |
| 13 | 0.483533 | C | 1 |
| 23 | 0.668943 | C | 1 |
| 8  | 0.479993 | C | 1 |
| 10 | 0.834541 | E | 1 |
| 7  | 0.243965 | C | 1 |
| 10 | 0.472115 | C | 1 |
| 2  | 0.698981 | C | 1 |
| 5  | 0.532275 | C | 1 |
| 10 | 0.167482 | I | 0 |

|    |          |   |   |
|----|----------|---|---|
| 15 | 0.599951 | C | 1 |
| 24 | 0.100181 | F | 0 |
| 21 | 0.575245 | C | 1 |
| 13 | 0.483533 | C | 1 |
| 10 | 0.552854 | C | 1 |
| 5  | 0.532275 | C | 1 |
| 15 | 0.599951 | C | 1 |
| 6  | 0.412065 | L | 0 |
| 2  | 0.698981 | C | 1 |
| 20 | 0.448532 | C | 1 |
| 7  | 0.367149 | C | 1 |
| 20 | 0.448532 | C | 1 |
| 1  | 0.441054 | C | 1 |
| 10 | 0.834541 | E | 1 |
| 7  | 0.478701 | C | 1 |
| 10 | 0.167482 | I | 0 |
| 2  | 0.721056 | K | 1 |
| 7  | 0.432318 | G | 0 |
| 6  | 0.266735 | C | 1 |
| 6  | 0.412065 | L | 0 |
| 8  | 0.248818 | C | 1 |
| 7  | 0.335725 | C | 1 |
| 5  | 0.532275 | C | 1 |
| 20 | 0.502777 | C | 1 |
| 17 | 0.610373 | C | 1 |
| 7  | 0.360822 | C | 1 |
| 13 | 0.483533 | C | 1 |
| 1  | 0.369881 | C | 1 |
| 7  | 0.301164 | C | 1 |
| 16 | 0.386903 | C | 1 |
| 9  | 0.399031 | C | 1 |
| 7  | 0.502719 | C | 1 |
| 23 | 0.668943 | C | 1 |
| 7  | 0.482074 | C | 1 |
| 6  | 0.558815 | C | 1 |
| 7  | 0.688024 | F | 0 |
| 21 | 0.575245 | C | 1 |
| 13 | 0.483533 | C | 1 |
| 1  | 0.39667  | I | 0 |
| 7  | 0.645108 | C | 1 |
| 13 | 0.483533 | C | 1 |
| 24 | 0.186046 | F | 0 |
| 7  | 0.068284 | C | 1 |
| 7  | 0.195259 | C | 1 |
| 2  | 0.43718  | C | 1 |
| 6  | 0.663348 | C | 1 |
| 6  | 0.58163  | C | 1 |
| 6  | 0.58163  | C | 1 |
| 24 | 0.633121 | S | 0 |
| 8  | 0.591505 | C | 1 |
| 1  | 0.210999 | C | 1 |
| 8  | 0.278296 | M | 0 |
| 19 | 0.790469 | F | 0 |
| 5  | 0.351082 | C | 1 |

|    |          |   |   |
|----|----------|---|---|
| 7  | 0.405427 | C | 1 |
| 6  | 0.663348 | C | 1 |
| 6  | 0.379824 | C | 1 |
| 11 | 0.489289 | C | 1 |
| 7  | 0.335725 | C | 1 |
| 2  | 0.398601 | C | 1 |
| 1  | 0.419437 | C | 1 |
| 23 | 0.668943 | C | 1 |
| 8  | 0.479993 | C | 1 |
| 24 | 0.55057  | C | 1 |
| 1  | 0.269608 | C | 1 |
| 1  | 0.178546 | C | 1 |
| 2  | 0.446364 | E | 1 |
| 6  | 0.68682  | N | 0 |
| 9  | 0.799787 | L | 0 |
| 7  | 0.312569 | I | 0 |
| 23 | 0.537705 | I | 0 |
| 2  | 0.398601 | C | 1 |
| 7  | 0.555532 | F | 0 |
| 24 | 0.55057  | C | 1 |
| 6  | 0.379824 | C | 1 |
| 24 | 0.310582 | F | 0 |
| 15 | 0.599951 | C | 1 |
| 5  | 0.298252 | C | 1 |
| 5  | 0.441311 | C | 1 |
| 10 | 0.167482 | I | 0 |
| 24 | 0.186046 | F | 0 |
| 7  | 0.538428 | C | 1 |
| 6  | 0.468501 | C | 1 |
| 2  | 0.789853 | C | 1 |
| 7  | 0.482074 | C | 1 |
| 2  | 0.579692 | E | 1 |
| 7  | 0.441878 | C | 1 |
| 2  | 0.446364 | E | 1 |
| 10 | 0.176405 | C | 1 |
| 24 | 0.55057  | C | 1 |
| 2  | 0.274189 | C | 1 |
| 17 | 0.610373 | C | 1 |
| 2  | 0.274189 | C | 1 |
| 7  | 0.502719 | C | 1 |
| 21 | 0.575245 | C | 1 |
| 20 | 0.698911 | K | 1 |
| 6  | 0.122899 | C | 1 |
| 7  | 0.596872 | F | 0 |
| 3  | 0.379041 | C | 1 |
| 2  | 0.398601 | C | 1 |
| 6  | 0.379824 | C | 1 |
| 5  | 0.377    | C | 1 |
| 13 | 0.483533 | C | 1 |
| 5  | 0.068284 | I | 0 |
| 7  | 0.243965 | C | 1 |
| 6  | 0.137649 | I | 0 |
| 6  | 0.412065 | L | 0 |
| 7  | 0.360822 | C | 1 |

|    |          |   |   |
|----|----------|---|---|
| 5  | 0.559303 | C | 1 |
| 23 | 0.668943 | C | 1 |
| 13 | 0.483533 | C | 1 |
| 10 | 0.583593 | C | 1 |
| 23 | 0.668943 | C | 1 |
| 2  | 0.698981 | C | 1 |
| 10 | 0.834541 | E | 1 |
| 10 | 0.684871 | C | 1 |
| 1  | 0.59178  | C | 1 |
| 20 | 0.684777 | C | 1 |
| 7  | 0.335725 | C | 1 |
| 8  | 0.278296 | M | 0 |
| 8  | 0.10283  | C | 1 |
| 24 | 0.310582 | F | 0 |
| 5  | 0.532275 | C | 1 |
| 1  | 0.406321 | C | 1 |
| 2  | 0.43718  | C | 1 |
| 5  | 0.559303 | C | 1 |
| 7  | 0.162803 | C | 1 |
| 6  | 0.411561 | I | 0 |
| 24 | 0.55057  | C | 1 |
| 20 | 0.502777 | C | 1 |
| 1  | 0.679348 | E | 1 |
| 1  | 0.419437 | C | 1 |
| 10 | 0.286771 | C | 1 |
| 6  | 0.103882 | C | 1 |
| 10 | 0.834541 | E | 1 |
| 7  | 0.360822 | C | 1 |
| 1  | 0.194007 | C | 1 |
| 5  | 0.559303 | C | 1 |
| 6  | 0.58163  | C | 1 |
| 20 | 0.684777 | C | 1 |
| 15 | 0.599951 | C | 1 |
| 20 | 0.448532 | C | 1 |
| 24 | 0.652011 | C | 1 |
| 1  | 0.271124 | I | 0 |
| 1  | 0.441054 | C | 1 |
| 5  | 0.387012 | C | 1 |
| 23 | 0.668943 | C | 1 |
| 10 | 0.552854 | C | 1 |
| 5  | 0.532275 | C | 1 |
| 7  | 0.645108 | C | 1 |
| 24 | 0.55057  | C | 1 |
| 6  | 0.346622 | C | 1 |
| 6  | 0.558815 | C | 1 |
| 5  | 0.351082 | C | 1 |
| 7  | 0.367149 | C | 1 |
| 24 | 0.55057  | C | 1 |
| 11 | 0.705592 | C | 1 |
| 7  | 0.392225 | C | 1 |
| 7  | 0.113059 | C | 1 |
| 7  | 0.360822 | C | 1 |
| 6  | 0.558815 | C | 1 |
| 9  | 0.183916 | C | 1 |



|    |          |   |   |
|----|----------|---|---|
| 1  | 0.269608 | C | 1 |
| 10 | 0.167482 | I | 0 |
| 16 | 0.386903 | C | 1 |
| 7  | 0.478675 | C | 1 |
| 2  | 0.446364 | E | 1 |
| 20 | 0.684777 | C | 1 |
| 7  | 0.566398 | E | 1 |
| 24 | 0.652011 | C | 1 |
| 24 | 0.652011 | C | 1 |
| 1  | 0.271124 | I | 0 |
| 23 | 0.668943 | C | 1 |
| 7  | 0.482074 | C | 1 |
| 8  | 0.602263 | K | 1 |
| 24 | 0.652011 | C | 1 |
| 10 | 0.583593 | C | 1 |
| 7  | 0.645108 | C | 1 |
| 6  | 0.558815 | C | 1 |
| 6  | 0.558815 | C | 1 |
| 6  | 0.103882 | C | 1 |
| 7  | 0.392225 | C | 1 |
| 8  | 0.602263 | K | 1 |
| 6  | 0.443207 | E | 1 |
| 10 | 0.18813  | C | 1 |
| 24 | 0.679887 | D | 1 |
| 23 | 0.668943 | C | 1 |
| 8  | 0.662474 | E | 1 |
| 10 | 0.286771 | C | 1 |
| 6  | 0.175604 | C | 1 |
| 1  | 0.59178  | C | 1 |
| 7  | 0.335725 | C | 1 |
| 24 | 0.633121 | S | 0 |
| 20 | 0.502777 | C | 1 |
| 1  | 0.59178  | C | 1 |
| 1  | 0.59178  | C | 1 |
| 20 | 0.477586 | F | 0 |
| 8  | 0.248818 | C | 1 |
| 6  | 0.663348 | C | 1 |
| 10 | 0.552854 | C | 1 |
| 7  | 0.195259 | C | 1 |
| 1  | 0.489218 | C | 1 |
| 10 | 0.150496 | C | 1 |
| 1  | 0.489218 | C | 1 |
| 21 | 0.575245 | C | 1 |
| 1  | 0.269608 | C | 1 |
| 6  | 0.379824 | C | 1 |
| 1  | 0.194007 | C | 1 |
| 2  | 0.602604 | C | 1 |
| 6  | 0.330927 | C | 1 |
| 7  | 0.401747 | I | 0 |
| 24 | 0.633121 | S | 0 |
| 23 | 0.861665 | F | 0 |
| 7  | 0.301164 | C | 1 |
| 1  | 0.260451 | C | 1 |
| 7  | 0.195259 | C | 1 |

|    |          |   |   |
|----|----------|---|---|
| 21 | 0.575245 | C | 1 |
| 6  | 0.468501 | C | 1 |
| 20 | 0.448532 | C | 1 |
| 7  | 0.432318 | G | 0 |
| 6  | 0.401945 | I | 0 |
| 24 | 0.310582 | F | 0 |
| 6  | 0.352464 | C | 1 |
| 9  | 0.271907 | I | 0 |
| 6  | 0.352464 | C | 1 |
| 7  | 0.482074 | C | 1 |
| 23 | 0.668943 | C | 1 |
| 23 | 0.642835 | C | 1 |
| 8  | 0.10283  | C | 1 |
| 10 | 0.567712 | C | 1 |
| 1  | 0.460545 | C | 1 |
| 19 | 0.790469 | F | 0 |
| 7  | 0.367149 | C | 1 |
| 23 | 0.668943 | C | 1 |
| 9  | 0.399031 | C | 1 |
| 7  | 0.195259 | C | 1 |
| 1  | 0.679348 | E | 1 |
| 6  | 0.103882 | C | 1 |
| 1  | 0.369881 | C | 1 |
| 23 | 0.668943 | C | 1 |
| 6  | 0.468501 | C | 1 |
| 13 | 0.483533 | C | 1 |
| 23 | 0.668943 | C | 1 |
| 24 | 0.55057  | C | 1 |
| 7  | 0.482074 | C | 1 |
| 11 | 0.705592 | C | 1 |
| 1  | 0.260451 | C | 1 |
| 6  | 0.330927 | C | 1 |
| 6  | 0.468501 | C | 1 |
| 1  | 0.39667  | I | 0 |
| 23 | 0.668943 | C | 1 |
| 7  | 0.367149 | C | 1 |
| 7  | 0.566398 | E | 1 |
| 2  | 0.43718  | C | 1 |
| 20 | 0.477586 | F | 0 |
| 7  | 0.688024 | F | 0 |
| 1  | 0.269608 | C | 1 |
| 15 | 0.599951 | C | 1 |
| 24 | 0.679887 | D | 1 |
| 6  | 0.586834 | L | 0 |
| 7  | 0.486291 | C | 1 |
| 7  | 0.482074 | C | 1 |
| 6  | 0.379824 | C | 1 |
| 6  | 0.411561 | I | 0 |
| 9  | 0.505574 | C | 1 |
| 9  | 0.153652 | C | 1 |
| 1  | 0.59178  | C | 1 |
| 6  | 0.48915  | C | 1 |
| 7  | 0.162803 | C | 1 |
| 7  | 0.243965 | C | 1 |

|    |          |   |   |
|----|----------|---|---|
| 1  | 0.324905 | C | 1 |
| 21 | 0.575245 | C | 1 |
| 7  | 0.243965 | C | 1 |
| 8  | 0.358124 | C | 1 |
| 7  | 0.51699  | I | 0 |
| 23 | 0.642835 | C | 1 |
| 6  | 0.58163  | C | 1 |
| 23 | 0.668943 | C | 1 |
| 2  | 0.43718  | C | 1 |
| 23 | 0.668943 | C | 1 |
| 20 | 0.610299 | C | 1 |
| 2  | 0.398601 | C | 1 |
| 23 | 0.642835 | C | 1 |
| 10 | 0.353559 | C | 1 |
| 17 | 0.374845 | C | 1 |
| 1  | 0.5435   | E | 1 |
| 7  | 0.478701 | C | 1 |
| 2  | 0.602604 | C | 1 |
| 20 | 0.698911 | K | 1 |
| 6  | 0.763765 | C | 1 |
| 8  | 0.647679 | I | 0 |
| 20 | 0.684777 | C | 1 |
| 23 | 0.668943 | C | 1 |
| 20 | 0.502777 | C | 1 |
| 7  | 0.367149 | C | 1 |
| 2  | 0.43718  | C | 1 |
| 7  | 0.688024 | F | 0 |
| 2  | 0.446364 | E | 1 |
| 23 | 0.818492 | C | 1 |
| 13 | 0.483533 | C | 1 |
| 1  | 0.369881 | C | 1 |
| 8  | 0.591505 | C | 1 |
| 17 | 0.374845 | C | 1 |
| 7  | 0.481227 | C | 1 |
| 9  | 0.271907 | I | 0 |
| 6  | 0.330927 | C | 1 |
| 6  | 0.379824 | C | 1 |
| 6  | 0.346622 | C | 1 |
| 9  | 0.505574 | C | 1 |
| 6  | 0.663348 | C | 1 |
| 23 | 0.668943 | C | 1 |
| 6  | 0.411561 | I | 0 |
| 7  | 0.482074 | C | 1 |
| 7  | 0.566398 | E | 1 |
| 7  | 0.441878 | C | 1 |
| 7  | 0.566398 | E | 1 |
| 11 | 0.489289 | C | 1 |
| 7  | 0.312569 | I | 0 |
| 8  | 0.591505 | C | 1 |
| 8  | 0.278296 | M | 0 |
| 23 | 0.668943 | C | 1 |
| 7  | 0.502719 | C | 1 |
| 5  | 0.532275 | C | 1 |
| 24 | 0.310582 | F | 0 |

|    |          |   |   |
|----|----------|---|---|
| 10 | 0.552854 | C | 1 |
| 7  | 0.390658 | I | 0 |
| 9  | 0.183916 | C | 1 |
| 23 | 0.668943 | C | 1 |
| 13 | 0.483533 | C | 1 |
| 13 | 0.483533 | C | 1 |
| 10 | 0.286771 | C | 1 |
| 9  | 0.799787 | L | 0 |
| 2  | 0.789853 | C | 1 |
| 15 | 0.599951 | C | 1 |
| 10 | 0.552854 | C | 1 |
| 7  | 0.162803 | C | 1 |
| 9  | 0.399031 | C | 1 |
| 5  | 0.450597 | C | 1 |
| 23 | 0.668943 | C | 1 |
| 6  | 0.594365 | C | 1 |
| 17 | 0.374845 | C | 1 |
| 23 | 0.642835 | C | 1 |
| 20 | 0.698911 | K | 1 |
| 5  | 0.559303 | C | 1 |
| 10 | 0.18813  | C | 1 |
| 5  | 0.438549 | I | 0 |
| 7  | 0.390658 | I | 0 |
| 7  | 0.33563  | C | 1 |
| 23 | 0.668943 | C | 1 |
| 23 | 0.861665 | F | 0 |
| 8  | 0.358124 | C | 1 |
| 17 | 0.374845 | C | 1 |
| 23 | 0.668943 | C | 1 |
| 11 | 0.705592 | C | 1 |
| 7  | 0.478675 | C | 1 |
| 8  | 0.591505 | C | 1 |
| 10 | 0.176405 | C | 1 |
| 5  | 0.532275 | C | 1 |
| 3  | 0.417669 | C | 1 |
| 6  | 0.468501 | C | 1 |
| 7  | 0.645108 | C | 1 |
| 6  | 0.558815 | C | 1 |
| 16 | 0.386903 | C | 1 |
| 7  | 0.702046 | C | 1 |
| 7  | 0.288565 | I | 0 |
| 10 | 0.286771 | C | 1 |
| 15 | 0.599951 | C | 1 |
| 2  | 0.721056 | K | 1 |
| 9  | 0.183916 | C | 1 |
| 6  | 0.468501 | C | 1 |
| 6  | 0.412065 | L | 0 |
| 7  | 0.131826 | C | 1 |
| 1  | 0.679348 | E | 1 |
| 8  | 0.278296 | M | 0 |
| 16 | 0.386903 | C | 1 |
| 6  | 0.330927 | C | 1 |
| 20 | 0.502777 | C | 1 |
| 6  | 0.68682  | N | 0 |

|    |          |   |   |
|----|----------|---|---|
| 7  | 0.195259 | C | 1 |
| 2  | 0.579692 | E | 1 |
| 3  | 0.144589 | C | 1 |
| 7  | 0.456612 | I | 0 |
| 10 | 0.552854 | C | 1 |
| 10 | 0.176405 | C | 1 |
| 7  | 0.392225 | C | 1 |
| 8  | 0.278296 | M | 0 |
| 3  | 0.417669 | C | 1 |
| 7  | 0.401747 | I | 0 |
| 20 | 0.684777 | C | 1 |
| 7  | 0.478701 | C | 1 |
| 7  | 0.301164 | C | 1 |
| 1  | 0.507279 | E | 1 |
| 24 | 0.55057  | C | 1 |
| 23 | 0.668943 | C | 1 |
| 16 | 0.386903 | C | 1 |
| 5  | 0.377    | C | 1 |
| 7  | 0.301164 | C | 1 |
| 20 | 0.502777 | C | 1 |
| 2  | 0.398601 | C | 1 |
| 6  | 0.763765 | C | 1 |
| 1  | 0.419437 | C | 1 |
| 1  | 0.458864 | C | 1 |
| 7  | 0.645108 | C | 1 |
| 7  | 0.360822 | C | 1 |
| 6  | 0.558815 | C | 1 |
| 6  | 0.594365 | C | 1 |
| 7  | 0.131826 | C | 1 |
| 1  | 0.406321 | C | 1 |
| 7  | 0.566398 | E | 1 |
| 9  | 0.505574 | C | 1 |
| 7  | 0.702046 | C | 1 |
| 1  | 0.507279 | E | 1 |
| 20 | 0.477586 | F | 0 |
| 10 | 0.286771 | C | 1 |
| 7  | 0.482074 | C | 1 |
| 7  | 0.596872 | F | 0 |
| 7  | 0.482074 | C | 1 |
| 9  | 0.799787 | L | 0 |
| 6  | 0.468501 | C | 1 |
| 1  | 0.441054 | C | 1 |
| 8  | 0.591505 | C | 1 |
| 12 | 0.540903 | E | 1 |
| 24 | 0.633121 | S | 0 |
| 23 | 0.668943 | C | 1 |
| 7  | 0.482074 | C | 1 |
| 8  | 0.10283  | C | 1 |
| 10 | 0.176405 | C | 1 |
| 7  | 0.482074 | C | 1 |
| 7  | 0.113059 | C | 1 |
| 6  | 0.122899 | C | 1 |
| 7  | 0.360822 | C | 1 |
| 11 | 0.705592 | C | 1 |

|    |          |   |   |
|----|----------|---|---|
| 7  | 0.645108 | C | 1 |
| 1  | 0.111323 | C | 1 |
| 24 | 0.55057  | C | 1 |
| 7  | 0.482074 | C | 1 |
| 8  | 0.10283  | C | 1 |
| 24 | 0.652011 | C | 1 |
| 10 | 0.552854 | C | 1 |
| 15 | 0.599951 | C | 1 |
| 16 | 0.386903 | C | 1 |
| 1  | 0.679348 | E | 1 |
| 7  | 0.645108 | C | 1 |
| 7  | 0.312569 | I | 0 |
| 23 | 0.537705 | I | 0 |
| 24 | 0.633121 | S | 0 |
| 7  | 0.645108 | C | 1 |
| 1  | 0.458864 | C | 1 |
| 10 | 0.834541 | E | 1 |
| 6  | 0.663348 | C | 1 |
| 7  | 0.113059 | C | 1 |
| 7  | 0.195259 | C | 1 |
| 24 | 0.186046 | F | 0 |
| 1  | 0.458864 | C | 1 |
| 15 | 0.599951 | C | 1 |
| 9  | 0.183916 | C | 1 |
| 7  | 0.068284 | C | 1 |
| 10 | 0.606626 | C | 1 |
| 24 | 0.633121 | S | 0 |
| 9  | 0.183916 | C | 1 |
| 5  | 0.387012 | C | 1 |
| 7  | 0.401747 | I | 0 |
| 1  | 0.39667  | I | 0 |
| 3  | 0.144589 | C | 1 |
| 8  | 0.278296 | M | 0 |
| 8  | 0.591505 | C | 1 |
| 10 | 0.176405 | C | 1 |
| 20 | 0.448532 | C | 1 |
| 22 | 0.761753 | C | 1 |
| 7  | 0.288565 | I | 0 |
| 15 | 0.599951 | C | 1 |
| 7  | 0.478675 | C | 1 |
| 24 | 0.652011 | C | 1 |
| 7  | 0.645108 | C | 1 |
| 6  | 0.346622 | C | 1 |
| 7  | 0.432318 | G | 0 |
| 7  | 0.538428 | C | 1 |
| 9  | 0.505574 | C | 1 |
| 6  | 0.48915  | C | 1 |
| 10 | 0.834541 | E | 1 |
| 8  | 0.278296 | M | 0 |
| 10 | 0.353559 | C | 1 |
| 23 | 0.668943 | C | 1 |
| 15 | 0.599951 | C | 1 |
| 15 | 0.599951 | C | 1 |
| 20 | 0.448532 | C | 1 |

|    |          |   |   |
|----|----------|---|---|
| 24 | 0.679887 | D | 1 |
| 5  | 0.387012 | C | 1 |
| 6  | 0.352464 | C | 1 |
| 7  | 0.482074 | C | 1 |
| 8  | 0.278296 | M | 0 |
| 1  | 0.441054 | C | 1 |
| 6  | 0.763765 | C | 1 |
| 7  | 0.288565 | I | 0 |
| 1  | 0.460545 | C | 1 |
| 23 | 0.668943 | C | 1 |
| 3  | 0.379041 | C | 1 |
| 1  | 0.269608 | C | 1 |
| 20 | 0.684777 | C | 1 |
| 5  | 0.259266 | I | 0 |
| 12 | 0.540903 | E | 1 |
| 7  | 0.392225 | C | 1 |
| 23 | 0.668943 | C | 1 |
| 7  | 0.555532 | F | 0 |
| 7  | 0.145377 | C | 1 |
| 23 | 0.537705 | I | 0 |
| 7  | 0.312569 | I | 0 |
| 2  | 0.398601 | C | 1 |
| 5  | 0.559303 | C | 1 |
| 23 | 0.668943 | C | 1 |
| 7  | 0.113059 | C | 1 |
| 9  | 0.505574 | C | 1 |
| 5  | 0.377    | C | 1 |
| 7  | 0.538428 | C | 1 |
| 24 | 0.633121 | S | 0 |
| 6  | 0.663348 | C | 1 |
| 17 | 0.374845 | C | 1 |
| 24 | 0.100181 | F | 0 |
| 6  | 0.346622 | C | 1 |
| 7  | 0.456612 | I | 0 |
| 24 | 0.310582 | F | 0 |
| 23 | 0.668943 | C | 1 |
| 6  | 0.401945 | I | 0 |
| 7  | 0.478701 | C | 1 |
| 24 | 0.679887 | D | 1 |
| 6  | 0.103882 | C | 1 |
| 10 | 0.176405 | C | 1 |
| 23 | 0.668943 | C | 1 |
| 15 | 0.599951 | C | 1 |
| 10 | 0.684871 | C | 1 |
| 7  | 0.538428 | C | 1 |
| 7  | 0.288565 | I | 0 |
| 7  | 0.335725 | C | 1 |
| 23 | 0.642835 | C | 1 |
| 7  | 0.392225 | C | 1 |
| 6  | 0.103882 | C | 1 |
| 7  | 0.51699  | I | 0 |
| 24 | 0.652011 | C | 1 |
| 23 | 0.668943 | C | 1 |
| 8  | 0.278296 | M | 0 |

|    |          |   |   |
|----|----------|---|---|
| 1  | 0.111323 | C | 1 |
| 6  | 0.763765 | C | 1 |
| 5  | 0.298252 | C | 1 |
| 1  | 0.460545 | C | 1 |
| 1  | 0.441054 | C | 1 |
| 20 | 0.477586 | F | 0 |
| 5  | 0.450597 | C | 1 |
| 1  | 0.489218 | C | 1 |
| 10 | 0.176405 | C | 1 |
| 5  | 0.276161 | C | 1 |
| 5  | 0.245946 | I | 0 |
| 8  | 0.430234 | C | 1 |
| 7  | 0.534136 | C | 1 |
| 10 | 0.406285 | C | 1 |
| 17 | 0.438952 | C | 1 |
| 2  | 0.411799 | N | 0 |
| 8  | 0.430234 | C | 1 |
| 3  | 0.324312 | C | 1 |
| 2  | 0.411799 | N | 0 |
| 8  | 0.430234 | C | 1 |
| 17 | 0.438952 | C | 1 |
| 7  | 0.534136 | C | 1 |
| 5  | 0.245946 | I | 0 |
| 17 | 0.438952 | C | 1 |
| 8  | 0.430234 | C | 1 |
| 17 | 0.438952 | C | 1 |
| 17 | 0.438952 | C | 1 |
| 7  | 0.534136 | C | 1 |
| 10 | 0.406285 | C | 1 |
| 3  | 0.39178  | C | 1 |
| 7  | 0.534136 | C | 1 |
| 8  | 0.430234 | C | 1 |
| 2  | 0.411799 | N | 0 |
| 6  | 0.14804  | B | 1 |
| 5  | 0.604133 | C | 1 |
| 2  | 0.249923 | C | 1 |
| 5  | 0.604133 | C | 1 |
| 8  | 0.430234 | C | 1 |
| 8  | 0.430234 | C | 1 |
| 5  | 0.245946 | I | 0 |
| 5  | 0.245946 | I | 0 |
| 8  | 0.430234 | C | 1 |
| 5  | 0.276161 | C | 1 |
| 2  | 0.249923 | C | 1 |
| 2  | 0.249923 | C | 1 |
| 6  | 0.258427 | C | 1 |
| 5  | 0.235124 | C | 1 |
| 8  | 0.430234 | C | 1 |
| 3  | 0.39178  | C | 1 |
| 2  | 0.249923 | C | 1 |
| 5  | 0.604133 | C | 1 |
| 8  | 0.430234 | C | 1 |
| 7  | 0.534136 | C | 1 |
| 6  | 0.258427 | C | 1 |



|    |          |   |   |
|----|----------|---|---|
| 7  | 0.534136 | C | 1 |
| 7  | 0.534136 | C | 1 |
| 3  | 0.39178  | C | 1 |
| 8  | 0.430234 | C | 1 |
| 5  | 0.276161 | C | 1 |
| 8  | 0.430234 | C | 1 |
| 2  | 0.249923 | C | 1 |
| 5  | 0.235124 | C | 1 |
| 8  | 0.430234 | C | 1 |
| 7  | 0.534136 | C | 1 |
| 10 | 0.406285 | C | 1 |
| 10 | 0.406285 | C | 1 |
| 3  | 0.324312 | C | 1 |
| 5  | 0.276161 | C | 1 |
| 8  | 0.430234 | C | 1 |
| 3  | 0.39178  | C | 1 |
| 11 | 0.388707 | C | 1 |
| 5  | 0.245946 | I | 0 |
| 7  | 0.534136 | C | 1 |
| 7  | 0.534136 | C | 1 |
| 7  | 0.534136 | C | 1 |
| 8  | 0.430234 | C | 1 |
| 5  | 0.245946 | I | 0 |
| 11 | 0.388707 | C | 1 |
| 7  | 0.534136 | C | 1 |
| 17 | 0.438952 | C | 1 |
| 8  | 0.430234 | C | 1 |
| 7  | 0.534136 | C | 1 |
| 8  | 0.430234 | C | 1 |
| 7  | 0.534136 | C | 1 |
| 7  | 0.534136 | C | 1 |
| 10 | 0.406285 | C | 1 |
| 17 | 0.438952 | C | 1 |
| 2  | 0.411799 | N | 0 |
| 3  | 0.324312 | C | 1 |
| 6  | 0.14804  | B | 1 |
| 6  | 0.14804  | B | 1 |
| 7  | 0.534136 | C | 1 |
| 7  | 0.534136 | C | 1 |
| 6  | 0.14804  | B | 1 |
| 3  | 0.324312 | C | 1 |
| 10 | 0.406285 | C | 1 |
| 7  | 0.534136 | C | 1 |
| 3  | 0.324312 | C | 1 |
| 5  | 0.235124 | C | 1 |
| 17 | 0.438952 | C | 1 |
| 5  | 0.276161 | C | 1 |
| 10 | 0.406285 | C | 1 |
| 7  | 0.534136 | C | 1 |
| 6  | 0.14804  | B | 1 |
| 5  | 0.276161 | C | 1 |
| 7  | 0.534136 | C | 1 |
| 7  | 0.534136 | C | 1 |
| 10 | 0.406285 | C | 1 |

|    |          |   |   |
|----|----------|---|---|
| 8  | 0.430234 | C | 1 |
| 7  | 0.534136 | C | 1 |
| 6  | 0.14804  | B | 1 |
| 3  | 0.324312 | C | 1 |
| 17 | 0.438952 | C | 1 |
| 2  | 0.411799 | N | 0 |
| 11 | 0.388707 | C | 1 |
| 6  | 0.258427 | C | 1 |
| 7  | 0.534136 | C | 1 |
| 17 | 0.438952 | C | 1 |
| 7  | 0.534136 | C | 1 |
| 10 | 0.406285 | C | 1 |
| 8  | 0.430234 | C | 1 |
| 3  | 0.39178  | C | 1 |
| 3  | 0.324312 | C | 1 |
| 6  | 0.258427 | C | 1 |
| 11 | 0.388707 | C | 1 |
| 3  | 0.39178  | C | 1 |
| 5  | 0.235124 | C | 1 |
| 6  | 0.14804  | B | 1 |
| 17 | 0.438952 | C | 1 |
| 2  | 0.249923 | C | 1 |
| 5  | 0.235124 | C | 1 |
| 3  | 0.39178  | C | 1 |
| 7  | 0.534136 | C | 1 |
| 11 | 0.388707 | C | 1 |
| 3  | 0.324312 | C | 1 |
| 5  | 0.245946 | I | 0 |
| 6  | 0.258427 | C | 1 |
| 5  | 0.604133 | C | 1 |
| 5  | 0.604133 | C | 1 |
| 7  | 0.534136 | C | 1 |
| 7  | 0.534136 | C | 1 |
| 5  | 0.245946 | I | 0 |
| 10 | 0.406285 | C | 1 |
| 5  | 0.276161 | C | 1 |
| 6  | 0.14804  | B | 1 |
| 5  | 0.245946 | I | 0 |
| 3  | 0.324312 | C | 1 |
| 8  | 0.430234 | C | 1 |
| 7  | 0.534136 | C | 1 |
| 3  | 0.490031 | C | 1 |
| 3  | 0.490031 | C | 1 |
| 3  | 0.490031 | C | 1 |
| 3  | 0.490031 | C | 1 |
| 3  | 0.490031 | C | 1 |
| 3  | 0.490031 | C | 1 |
| 9  | 0.595361 | F | 0 |
| 10 | 0.554594 | C | 1 |
| 15 | 0.678312 | C | 1 |
| 24 | 0.226262 | C | 1 |
| 15 | 0.678312 | C | 1 |
| 24 | 0.226262 | C | 1 |
| 10 | 0.554594 | C | 1 |

|    |          |   |   |
|----|----------|---|---|
| 15 | 0.678312 | C | 1 |
| 15 | 0.678312 | C | 1 |
| 24 | 0.226262 | C | 1 |
| 24 | 0.226262 | C | 1 |
| 15 | 0.678312 | C | 1 |
| 15 | 0.678312 | C | 1 |
| 9  | 0.595361 | F | 0 |
| 15 | 0.678312 | C | 1 |
| 24 | 0.226262 | C | 1 |
| 24 | 0.226262 | C | 1 |
| 24 | 0.226262 | C | 1 |
| 9  | 0.595361 | F | 0 |
| 24 | 0.226262 | C | 1 |
| 24 | 0.226262 | C | 1 |
| 15 | 0.678312 | C | 1 |
| 24 | 0.226262 | C | 1 |
| 15 | 0.678312 | C | 1 |
| 24 | 0.226262 | C | 1 |
| 10 | 0.554594 | C | 1 |
| 15 | 0.678312 | C | 1 |
| 24 | 0.226262 | C | 1 |
| 15 | 0.678312 | C | 1 |
| 15 | 0.678312 | C | 1 |
| 7  | 0.504365 | A | 0 |
| 7  | 0.504365 | A | 0 |
| 14 | 0.336659 | C | 1 |
| 14 | 0.336659 | C | 1 |
| 7  | 0.504365 | A | 0 |
| 7  | 0.504365 | A | 0 |
| 14 | 0.336659 | C | 1 |
| 14 | 0.336659 | C | 1 |
| 7  | 0.504365 | A | 0 |
| 14 | 0.336659 | C | 1 |
| 7  | 0.504365 | A | 0 |
| 7  | 0.504365 | A | 0 |
| 6  | 0.186983 | C | 1 |
| 1  | 0.496093 | C | 1 |
| 6  | 0.392133 | C | 1 |
| 6  | 0.392133 | C | 1 |
| 6  | 0.186983 | C | 1 |
| 19 | 0.477653 | C | 1 |
| 19 | 0.477653 | C | 1 |
| 19 | 0.477653 | C | 1 |
| 1  | 0.496093 | C | 1 |
| 6  | 0.186983 | C | 1 |
| 19 | 0.477653 | C | 1 |
| 19 | 0.477653 | C | 1 |
| 6  | 0.392133 | C | 1 |
| 6  | 0.186983 | C | 1 |
| 6  | 0.186983 | C | 1 |
| 1  | 0.496093 | C | 1 |
| 19 | 0.477653 | C | 1 |
| 1  | 0.496093 | C | 1 |
| 6  | 0.392133 | C | 1 |

|    |          |   |   |
|----|----------|---|---|
| 19 | 0.477653 | C | 1 |
| 19 | 0.477653 | C | 1 |
| 19 | 0.477653 | C | 1 |
| 1  | 0.496093 | C | 1 |
| 1  | 0.496093 | C | 1 |
| 6  | 0.186983 | C | 1 |
| 6  | 0.392133 | C | 1 |
| 1  | 0.496093 | C | 1 |
| 21 | 0.64059  | C | 1 |
| 13 | 0.305504 | C | 1 |
| 16 | 0.580132 | C | 1 |
| 7  | 0.269054 | C | 1 |
| 13 | 0.305504 | C | 1 |
| 21 | 0.64059  | C | 1 |
| 7  | 0.269054 | C | 1 |
| 7  | 0.269054 | C | 1 |
| 13 | 0.305504 | C | 1 |
| 7  | 0.269054 | C | 1 |
| 13 | 0.305504 | C | 1 |
| 16 | 0.580132 | C | 1 |
| 7  | 0.269054 | C | 1 |
| 13 | 0.305504 | C | 1 |
| 16 | 0.580132 | C | 1 |
| 13 | 0.305504 | C | 1 |
| 16 | 0.580132 | C | 1 |
| 13 | 0.305504 | C | 1 |
| 7  | 0.269054 | C | 1 |
| 13 | 0.305504 | C | 1 |
| 13 | 0.305504 | C | 1 |
| 16 | 0.580132 | C | 1 |
| 7  | 0.269054 | C | 1 |
| 21 | 0.64059  | C | 1 |
| 7  | 0.269054 | C | 1 |
| 7  | 0.269054 | C | 1 |
| 20 | 0.495854 | C | 1 |
| 20 | 0.495854 | C | 1 |
| 19 | 0.330102 | C | 1 |
| 19 | 0.330102 | C | 1 |
| 19 | 0.330102 | C | 1 |
| 20 | 0.495854 | C | 1 |
| 20 | 0.495854 | C | 1 |
| 19 | 0.330102 | C | 1 |
| 19 | 0.330102 | C | 1 |
| 19 | 0.330102 | C | 1 |
| 20 | 0.495854 | C | 1 |
| 19 | 0.330102 | C | 1 |
| 20 | 0.495854 | C | 1 |
| 19 | 0.330102 | C | 1 |
| 19 | 0.330102 | C | 1 |
| 19 | 0.330102 | C | 1 |
| 6  | 0.58598  | E | 1 |
| 6  | 0.58598  | E | 1 |
| 17 | 0.713381 | C | 1 |
| 9  | 0.438572 | C | 1 |

|    |          |   |   |
|----|----------|---|---|
| 21 | 0.229517 | C | 1 |
| 6  | 0.152157 | C | 1 |
| 11 | 0.550772 | C | 1 |
| 9  | 0.438572 | C | 1 |
| 7  | 0.23695  | C | 1 |
| 9  | 0.438572 | C | 1 |
| 19 | 0.630787 | C | 1 |
| 9  | 0.438572 | C | 1 |
| 21 | 0.229517 | C | 1 |
| 6  | 0.152157 | C | 1 |
| 21 | 0.229517 | C | 1 |
| 9  | 0.438572 | C | 1 |
| 10 | 0.702829 | C | 1 |
| 9  | 0.438572 | C | 1 |
| 17 | 0.713381 | C | 1 |
| 10 | 0.702829 | C | 1 |
| 7  | 0.23695  | C | 1 |
| 20 | 0.297514 | C | 1 |
| 7  | 0.23695  | C | 1 |
| 7  | 0.689636 | C | 1 |
| 6  | 0.58598  | E | 1 |
| 10 | 0.702829 | C | 1 |
| 10 | 0.233449 | C | 1 |
| 3  | 0.525695 | C | 1 |
| 9  | 0.438572 | C | 1 |
| 10 | 0.702829 | C | 1 |
| 17 | 0.713381 | C | 1 |
| 17 | 0.713381 | C | 1 |
| 21 | 0.229517 | C | 1 |
| 10 | 0.702829 | C | 1 |
| 3  | 0.525695 | C | 1 |
| 10 | 0.233449 | C | 1 |
| 6  | 0.58598  | E | 1 |
| 7  | 0.23695  | C | 1 |
| 10 | 0.702829 | C | 1 |
| 3  | 0.525695 | C | 1 |
| 5  | 0.575187 | C | 1 |
| 11 | 0.550772 | C | 1 |
| 10 | 0.702829 | C | 1 |
| 20 | 0.297514 | C | 1 |
| 3  | 0.525695 | C | 1 |
| 9  | 0.438572 | C | 1 |
| 3  | 0.525695 | C | 1 |
| 3  | 0.525695 | C | 1 |
| 7  | 0.23695  | C | 1 |
| 6  | 0.58598  | E | 1 |
| 9  | 0.438572 | C | 1 |
| 7  | 0.23695  | C | 1 |
| 10 | 0.702829 | C | 1 |
| 9  | 0.438572 | C | 1 |
| 7  | 0.23695  | C | 1 |
| 10 | 0.702829 | C | 1 |
| 17 | 0.713381 | C | 1 |
| 10 | 0.233449 | C | 1 |

|    |          |   |   |
|----|----------|---|---|
| 21 | 0.229517 | C | 1 |
| 10 | 0.702829 | C | 1 |
| 6  | 0.58598  | E | 1 |
| 3  | 0.525695 | C | 1 |
| 5  | 0.575187 | C | 1 |
| 10 | 0.702829 | C | 1 |
| 19 | 0.630787 | C | 1 |
| 10 | 0.702829 | C | 1 |
| 20 | 0.297514 | C | 1 |
| 7  | 0.23695  | C | 1 |
| 9  | 0.438572 | C | 1 |
| 10 | 0.702829 | C | 1 |
| 7  | 0.689636 | C | 1 |
| 5  | 0.575187 | C | 1 |
| 10 | 0.702829 | C | 1 |
| 10 | 0.233449 | C | 1 |
| 20 | 0.297514 | C | 1 |
| 9  | 0.438572 | C | 1 |
| 17 | 0.713381 | C | 1 |
| 17 | 0.713381 | C | 1 |
| 6  | 0.152157 | C | 1 |
| 7  | 0.23695  | C | 1 |
| 17 | 0.713381 | C | 1 |
| 10 | 0.233449 | C | 1 |
| 9  | 0.438572 | C | 1 |
| 10 | 0.702829 | C | 1 |
| 10 | 0.702829 | C | 1 |
| 7  | 0.23695  | C | 1 |
| 6  | 0.58598  | E | 1 |
| 10 | 0.233449 | C | 1 |
| 7  | 0.23695  | C | 1 |
| 7  | 0.689636 | C | 1 |
| 10 | 0.702829 | C | 1 |
| 7  | 0.23695  | C | 1 |
| 17 | 0.713381 | C | 1 |
| 10 | 0.702829 | C | 1 |
| 6  | 0.58598  | E | 1 |
| 10 | 0.702829 | C | 1 |
| 10 | 0.702829 | C | 1 |
| 19 | 0.630787 | C | 1 |
| 10 | 0.702829 | C | 1 |
| 19 | 0.630787 | C | 1 |
| 11 | 0.550772 | C | 1 |
| 6  | 0.58598  | E | 1 |
| 6  | 0.58598  | E | 1 |
| 17 | 0.713381 | C | 1 |
| 9  | 0.438572 | C | 1 |
| 9  | 0.438572 | C | 1 |
| 10 | 0.702829 | C | 1 |
| 16 | 0.154789 | C | 1 |
| 16 | 0.154789 | C | 1 |
| 16 | 0.154789 | C | 1 |
| 16 | 0.154789 | C | 1 |
| 16 | 0.154789 | C | 1 |

|    |          |   |   |
|----|----------|---|---|
| 16 | 0.154789 | C | 1 |
| 16 | 0.154789 | C | 1 |
| 2  | 0.457853 | C | 1 |
| 3  | 0.201615 | C | 1 |
| 2  | 0.457853 | C | 1 |
| 1  | 0.188222 | C | 1 |
| 7  | 0.330389 | C | 1 |
| 2  | 0.123153 | C | 1 |
| 3  | 0.201615 | C | 1 |
| 2  | 0.457853 | C | 1 |
| 7  | 0.330389 | C | 1 |
| 2  | 0.123153 | C | 1 |
| 3  | 0.201615 | C | 1 |
| 7  | 0.330389 | C | 1 |
| 7  | 0.330389 | C | 1 |
| 3  | 0.201615 | C | 1 |
| 2  | 0.457853 | C | 1 |
| 7  | 0.330389 | C | 1 |
| 3  | 0.201615 | C | 1 |
| 1  | 0.188222 | C | 1 |
| 2  | 0.123153 | C | 1 |
| 2  | 0.123153 | C | 1 |
| 2  | 0.123153 | C | 1 |
| 1  | 0.188222 | C | 1 |
| 1  | 0.188222 | C | 1 |
| 2  | 0.457853 | C | 1 |
| 1  | 0.188222 | C | 1 |
| 7  | 0.330389 | C | 1 |
| 2  | 0.457853 | C | 1 |
| 7  | 0.330389 | C | 1 |
| 7  | 0.330389 | C | 1 |
| 9  | 0.483155 | C | 1 |
| 9  | 0.483155 | C | 1 |
| 2  | 0.184991 | C | 1 |
| 9  | 0.483155 | C | 1 |
| 2  | 0.184991 | C | 1 |
| 9  | 0.483155 | C | 1 |
| 9  | 0.483155 | C | 1 |
| 2  | 0.184991 | C | 1 |
| 2  | 0.184991 | C | 1 |
| 9  | 0.483155 | C | 1 |
| 9  | 0.483155 | C | 1 |
| 9  | 0.483155 | C | 1 |
| 9  | 0.483155 | C | 1 |
| 9  | 0.483155 | C | 1 |
| 2  | 0.184991 | C | 1 |
| 9  | 0.483155 | C | 1 |
| 9  | 0.483155 | C | 1 |
| 9  | 0.483155 | C | 1 |
| 9  | 0.483155 | C | 1 |
| 5  | 0.376318 | C | 1 |
| 16 | 0.532809 | C | 1 |
| 1  | 0.262489 | C | 1 |
| 7  | 0.496163 | E | 1 |
| 12 | 0.154428 | A | 0 |
| 6  | 0.105817 | C | 1 |

|    |          |   |   |
|----|----------|---|---|
| 7  | 0.486563 | C | 1 |
| 7  | 0.206504 | C | 1 |
| 7  | 0.206504 | C | 1 |
| 19 | 0.48694  | C | 1 |
| 19 | 0.48694  | C | 1 |
| 19 | 0.48694  | C | 1 |
| 12 | 0.154428 | A | 0 |
| 5  | 0.487087 | C | 1 |
| 6  | 0.217792 | C | 1 |
| 16 | 0.532809 | C | 1 |
| 5  | 0.487087 | C | 1 |
| 16 | 0.532809 | C | 1 |
| 7  | 0.496163 | E | 1 |
| 2  | 0.332007 | C | 1 |
| 6  | 0.105817 | C | 1 |
| 20 | 0.341871 | C | 1 |
| 9  | 0.164134 | C | 1 |
| 1  | 0.550893 | C | 1 |
| 7  | 0.206504 | C | 1 |
| 16 | 0.532809 | C | 1 |
| 16 | 0.532809 | C | 1 |
| 7  | 0.496163 | E | 1 |
| 9  | 0.673905 | C | 1 |
| 9  | 0.164134 | C | 1 |
| 19 | 0.48694  | C | 1 |
| 9  | 0.673905 | C | 1 |
| 7  | 0.496163 | E | 1 |
| 20 | 0.341871 | C | 1 |
| 7  | 0.206504 | C | 1 |
| 19 | 0.48694  | C | 1 |
| 12 | 0.154428 | A | 0 |
| 16 | 0.532809 | C | 1 |
| 7  | 0.206504 | C | 1 |
| 7  | 0.206504 | C | 1 |
| 7  | 0.206504 | C | 1 |
| 7  | 0.189489 | C | 1 |
| 7  | 0.496163 | E | 1 |
| 7  | 0.189489 | C | 1 |
| 3  | 0.201419 | C | 1 |
| 5  | 0.487087 | C | 1 |
| 9  | 0.164134 | C | 1 |
| 6  | 0.105817 | C | 1 |
| 1  | 0.550893 | C | 1 |
| 5  | 0.376318 | C | 1 |
| 7  | 0.189489 | C | 1 |
| 7  | 0.206504 | C | 1 |
| 6  | 0.217792 | C | 1 |
| 7  | 0.486563 | C | 1 |
| 19 | 0.48694  | C | 1 |
| 9  | 0.673905 | C | 1 |
| 19 | 0.48694  | C | 1 |
| 3  | 0.201419 | C | 1 |
| 7  | 0.189489 | C | 1 |
| 5  | 0.487087 | C | 1 |



|    |          |   |   |
|----|----------|---|---|
| 7  | 0.300395 | C | 1 |
| 20 | 0.341871 | C | 1 |
| 20 | 0.341871 | C | 1 |
| 19 | 0.48694  | C | 1 |
| 1  | 0.550893 | C | 1 |
| 9  | 0.164134 | C | 1 |
| 7  | 0.486563 | C | 1 |
| 9  | 0.164134 | C | 1 |
| 9  | 0.164134 | C | 1 |
| 7  | 0.486563 | C | 1 |
| 1  | 0.550893 | C | 1 |
| 6  | 0.217792 | C | 1 |
| 20 | 0.341871 | C | 1 |
| 7  | 0.486563 | C | 1 |
| 7  | 0.206504 | C | 1 |
| 7  | 0.189489 | C | 1 |
| 5  | 0.376318 | C | 1 |
| 20 | 0.341871 | C | 1 |
| 7  | 0.496163 | E | 1 |
| 6  | 0.217792 | C | 1 |
| 9  | 0.164134 | C | 1 |
| 9  | 0.164134 | C | 1 |
| 7  | 0.206504 | C | 1 |
| 7  | 0.486563 | C | 1 |
| 7  | 0.206504 | C | 1 |
| 6  | 0.217792 | C | 1 |
| 9  | 0.164134 | C | 1 |
| 9  | 0.673905 | C | 1 |
| 5  | 0.487087 | C | 1 |
| 7  | 0.300395 | C | 1 |
| 6  | 0.105817 | C | 1 |
| 12 | 0.154428 | A | 0 |
| 7  | 0.206504 | C | 1 |
| 20 | 0.341871 | C | 1 |
| 7  | 0.486563 | C | 1 |
| 20 | 0.341871 | C | 1 |
| 6  | 0.105817 | C | 1 |
| 5  | 0.487087 | C | 1 |
| 6  | 0.105817 | C | 1 |
| 6  | 0.105817 | C | 1 |
| 6  | 0.105817 | C | 1 |
| 1  | 0.550893 | C | 1 |
| 20 | 0.341871 | C | 1 |
| 3  | 0.201419 | C | 1 |
| 3  | 0.201419 | C | 1 |
| 7  | 0.206504 | C | 1 |
| 5  | 0.376318 | C | 1 |
| 3  | 0.201419 | C | 1 |
| 7  | 0.486563 | C | 1 |
| 7  | 0.486563 | C | 1 |
| 19 | 0.48694  | C | 1 |
| 1  | 0.262489 | C | 1 |
| 20 | 0.341871 | C | 1 |
| 1  | 0.550893 | C | 1 |

|    |          |   |   |
|----|----------|---|---|
| 6  | 0.217792 | C | 1 |
| 5  | 0.376318 | C | 1 |
| 7  | 0.206504 | C | 1 |
| 16 | 0.532809 | C | 1 |
| 12 | 0.154428 | A | 0 |
| 20 | 0.341871 | C | 1 |
| 7  | 0.300395 | C | 1 |
| 19 | 0.48694  | C | 1 |
| 7  | 0.189489 | C | 1 |
| 6  | 0.105817 | C | 1 |
| 7  | 0.496163 | E | 1 |
| 5  | 0.376318 | C | 1 |
| 3  | 0.201419 | C | 1 |
| 5  | 0.376318 | C | 1 |
| 19 | 0.48694  | C | 1 |
| 1  | 0.262489 | C | 1 |
| 6  | 0.217792 | C | 1 |
| 2  | 0.332007 | C | 1 |
| 6  | 0.217792 | C | 1 |
| 12 | 0.154428 | A | 0 |
| 20 | 0.341871 | C | 1 |
| 20 | 0.341871 | C | 1 |
| 5  | 0.376318 | C | 1 |
| 16 | 0.532809 | C | 1 |
| 16 | 0.532809 | C | 1 |
| 9  | 0.673905 | C | 1 |
| 16 | 0.532809 | C | 1 |
| 2  | 0.332007 | C | 1 |
| 1  | 0.550893 | C | 1 |
| 5  | 0.376318 | C | 1 |
| 5  | 0.487087 | C | 1 |
| 7  | 0.335041 | C | 1 |
| 7  | 0.541105 | G | 0 |
| 7  | 0.361605 | C | 1 |
| 6  | 0.360358 | C | 1 |
| 6  | 0.360358 | C | 1 |
| 14 | 0.740233 | C | 1 |
| 14 | 0.740233 | C | 1 |
| 7  | 0.361605 | C | 1 |
| 7  | 0.335041 | C | 1 |
| 7  | 0.361605 | C | 1 |
| 7  | 0.361605 | C | 1 |
| 15 | 0.699506 | C | 1 |
| 14 | 0.740233 | C | 1 |
| 7  | 0.54544  | C | 1 |
| 7  | 0.541105 | G | 0 |
| 6  | 0.360358 | C | 1 |
| 6  | 0.360358 | C | 1 |
| 6  | 0.360358 | C | 1 |
| 7  | 0.361605 | C | 1 |
| 6  | 0.360358 | C | 1 |
| 6  | 0.360358 | C | 1 |
| 6  | 0.360358 | C | 1 |
| 7  | 0.541105 | G | 0 |

|    |          |   |   |
|----|----------|---|---|
| 14 | 0.740233 | C | 1 |
| 7  | 0.54544  | C | 1 |
| 7  | 0.361605 | C | 1 |
| 7  | 0.541105 | G | 0 |
| 7  | 0.361605 | C | 1 |
| 7  | 0.54544  | C | 1 |
| 6  | 0.360358 | C | 1 |
| 7  | 0.54544  | C | 1 |
| 7  | 0.361605 | C | 1 |
| 7  | 0.361605 | C | 1 |
| 7  | 0.541105 | G | 0 |
| 15 | 0.699506 | C | 1 |
| 15 | 0.699506 | C | 1 |
| 7  | 0.335041 | C | 1 |
| 7  | 0.335041 | C | 1 |
| 7  | 0.335041 | C | 1 |
| 7  | 0.335041 | C | 1 |
| 15 | 0.699506 | C | 1 |
| 7  | 0.361605 | C | 1 |
| 7  | 0.54544  | C | 1 |
| 15 | 0.699506 | C | 1 |
| 7  | 0.54544  | C | 1 |
| 6  | 0.360358 | C | 1 |
| 7  | 0.361605 | C | 1 |
| 7  | 0.361605 | C | 1 |
| 7  | 0.54544  | C | 1 |
| 14 | 0.740233 | C | 1 |
| 6  | 0.360358 | C | 1 |
| 7  | 0.335041 | C | 1 |
| 7  | 0.361605 | C | 1 |
| 7  | 0.361605 | C | 1 |
| 14 | 0.740233 | C | 1 |
| 6  | 0.360358 | C | 1 |
| 15 | 0.699506 | C | 1 |
| 15 | 0.699506 | C | 1 |
| 7  | 0.335041 | C | 1 |
| 7  | 0.335041 | C | 1 |
| 7  | 0.361605 | C | 1 |
| 7  | 0.54544  | C | 1 |
| 7  | 0.541105 | G | 0 |
| 7  | 0.541105 | G | 0 |
| 7  | 0.54544  | C | 1 |
| 7  | 0.54544  | C | 1 |
| 18 | 0.436057 | C | 1 |
| 18 | 0.436057 | C | 1 |
| 18 | 0.436057 | C | 1 |
| 1  | 0.187911 | C | 1 |
| 1  | 0.187911 | C | 1 |
| 1  | 0.187911 | C | 1 |
| 1  | 0.187911 | C | 1 |
| 1  | 0.187911 | C | 1 |
| 1  | 0.187911 | C | 1 |
| 1  | 0.187911 | C | 1 |
| 1  | 0.187911 | C | 1 |
| 24 | 0.293382 | C | 1 |

|    |          |   |   |
|----|----------|---|---|
| 2  | 0.118804 | C | 1 |
| 21 | 0.689094 | C | 1 |
| 24 | 0.293382 | C | 1 |
| 7  | 0.160568 | C | 1 |
| 6  | 0.543003 | C | 1 |
| 24 | 0.293382 | C | 1 |
| 7  | 0.206383 | I | 0 |
| 24 | 0.293382 | C | 1 |
| 6  | 0.307596 | C | 1 |
| 7  | 0.160568 | C | 1 |
| 23 | 0.628915 | S | 0 |
| 1  | 0.182627 | C | 1 |
| 7  | 0.206383 | I | 0 |
| 24 | 0.293382 | C | 1 |
| 6  | 0.543003 | C | 1 |
| 23 | 0.628915 | S | 0 |
| 24 | 0.293382 | C | 1 |
| 2  | 0.118804 | C | 1 |
| 7  | 0.160568 | C | 1 |
| 6  | 0.307596 | C | 1 |
| 21 | 0.689094 | C | 1 |
| 2  | 0.118804 | C | 1 |
| 3  | 0.456419 | C | 1 |
| 3  | 0.456419 | C | 1 |
| 21 | 0.689094 | C | 1 |
| 10 | 0.79867  | C | 1 |
| 10 | 0.79867  | C | 1 |
| 21 | 0.689094 | C | 1 |
| 6  | 0.543003 | C | 1 |
| 10 | 0.79867  | C | 1 |
| 21 | 0.689094 | C | 1 |
| 21 | 0.689094 | C | 1 |
| 11 | 0.160246 | I | 0 |
| 21 | 0.689094 | C | 1 |
| 24 | 0.293382 | C | 1 |
| 21 | 0.689094 | C | 1 |
| 7  | 0.249985 | C | 1 |
| 7  | 0.206383 | I | 0 |
| 21 | 0.689094 | C | 1 |
| 6  | 0.307596 | C | 1 |
| 10 | 0.79867  | C | 1 |
| 6  | 0.307596 | C | 1 |
| 21 | 0.689094 | C | 1 |
| 6  | 0.307596 | C | 1 |
| 10 | 0.132387 | C | 1 |
| 6  | 0.307596 | C | 1 |
| 21 | 0.689094 | C | 1 |
| 10 | 0.79867  | C | 1 |
| 21 | 0.689094 | C | 1 |
| 23 | 0.628915 | S | 0 |
| 6  | 0.543003 | C | 1 |
| 7  | 0.249985 | C | 1 |
| 7  | 0.22346  | G | 0 |
| 6  | 0.307596 | C | 1 |

|    |          |   |   |
|----|----------|---|---|
| 10 | 0.132387 | C | 1 |
| 21 | 0.689094 | C | 1 |
| 1  | 0.182627 | C | 1 |
| 3  | 0.456419 | C | 1 |
| 11 | 0.160246 | I | 0 |
| 6  | 0.543003 | C | 1 |
| 21 | 0.689094 | C | 1 |
| 6  | 0.543003 | C | 1 |
| 6  | 0.543003 | C | 1 |
| 11 | 0.160246 | I | 0 |
| 21 | 0.689094 | C | 1 |
| 7  | 0.160568 | C | 1 |
| 6  | 0.543003 | C | 1 |
| 10 | 0.132387 | C | 1 |
| 7  | 0.22346  | G | 0 |
| 23 | 0.628915 | S | 0 |
| 1  | 0.112322 | I | 0 |
| 21 | 0.689094 | C | 1 |
| 21 | 0.689094 | C | 1 |
| 21 | 0.689094 | C | 1 |
| 10 | 0.79867  | C | 1 |
| 10 | 0.79867  | C | 1 |
| 7  | 0.206383 | I | 0 |
| 7  | 0.22346  | G | 0 |
| 7  | 0.22346  | G | 0 |
| 3  | 0.456419 | C | 1 |
| 3  | 0.456419 | C | 1 |
| 10 | 0.132387 | C | 1 |
| 21 | 0.689094 | C | 1 |
| 21 | 0.689094 | C | 1 |
| 13 | 0.390939 | C | 1 |
| 21 | 0.689094 | C | 1 |
| 21 | 0.689094 | C | 1 |
| 24 | 0.293382 | C | 1 |
| 21 | 0.689094 | C | 1 |
| 7  | 0.22346  | G | 0 |
| 7  | 0.249985 | C | 1 |
| 7  | 0.160568 | C | 1 |
| 3  | 0.456419 | C | 1 |
| 10 | 0.79867  | C | 1 |
| 21 | 0.689094 | C | 1 |
| 7  | 0.249985 | C | 1 |
| 6  | 0.543003 | C | 1 |
| 1  | 0.182627 | C | 1 |
| 24 | 0.293382 | C | 1 |
| 7  | 0.249985 | C | 1 |
| 7  | 0.206383 | I | 0 |
| 1  | 0.112322 | I | 0 |
| 1  | 0.182627 | C | 1 |
| 1  | 0.182627 | C | 1 |
| 21 | 0.689094 | C | 1 |
| 6  | 0.307596 | C | 1 |
| 2  | 0.118804 | C | 1 |
| 7  | 0.206383 | I | 0 |

|    |          |   |   |
|----|----------|---|---|
| 2  | 0.118804 | C | 1 |
| 10 | 0.132387 | C | 1 |
| 21 | 0.689094 | C | 1 |
| 11 | 0.160246 | I | 0 |
| 21 | 0.689094 | C | 1 |
| 10 | 0.132387 | C | 1 |
| 21 | 0.689094 | C | 1 |
| 2  | 0.118804 | C | 1 |
| 7  | 0.249985 | C | 1 |
| 3  | 0.456419 | C | 1 |
| 10 | 0.79867  | C | 1 |
| 1  | 0.112322 | I | 0 |
| 10 | 0.132387 | C | 1 |
| 23 | 0.628915 | S | 0 |
| 24 | 0.293382 | C | 1 |
| 3  | 0.456419 | C | 1 |
| 21 | 0.689094 | C | 1 |
| 21 | 0.689094 | C | 1 |
| 3  | 0.456419 | C | 1 |
| 24 | 0.293382 | C | 1 |
| 6  | 0.307596 | C | 1 |
| 13 | 0.390939 | C | 1 |
| 7  | 0.249985 | C | 1 |
| 6  | 0.307596 | C | 1 |
| 3  | 0.456419 | C | 1 |
| 10 | 0.132387 | C | 1 |
| 6  | 0.307596 | C | 1 |
| 21 | 0.689094 | C | 1 |
| 7  | 0.206383 | I | 0 |
| 24 | 0.293382 | C | 1 |
| 21 | 0.689094 | C | 1 |
| 7  | 0.160568 | C | 1 |
| 21 | 0.689094 | C | 1 |
| 10 | 0.79867  | C | 1 |
| 24 | 0.293382 | C | 1 |
| 10 | 0.79867  | C | 1 |
| 3  | 0.456419 | C | 1 |
| 21 | 0.689094 | C | 1 |
| 7  | 0.206383 | I | 0 |
| 2  | 0.118804 | C | 1 |
| 21 | 0.689094 | C | 1 |
| 24 | 0.293382 | C | 1 |
| 6  | 0.543003 | C | 1 |
| 7  | 0.160568 | C | 1 |
| 13 | 0.390939 | C | 1 |
| 21 | 0.689094 | C | 1 |
| 23 | 0.628915 | S | 0 |
| 7  | 0.160568 | C | 1 |
| 21 | 0.689094 | C | 1 |
| 11 | 0.160246 | I | 0 |
| 11 | 0.160246 | I | 0 |
| 13 | 0.390939 | C | 1 |
| 24 | 0.293382 | C | 1 |
| 24 | 0.293382 | C | 1 |

|    |          |   |   |
|----|----------|---|---|
| 7  | 0.160568 | C | 1 |
| 21 | 0.689094 | C | 1 |
| 24 | 0.293382 | C | 1 |
| 2  | 0.118804 | C | 1 |
| 7  | 0.206383 | I | 0 |
| 10 | 0.132387 | C | 1 |
| 11 | 0.160246 | I | 0 |
| 5  | 0.279399 | C | 1 |
| 5  | 0.279399 | C | 1 |
| 5  | 0.279399 | C | 1 |
| 7  | 0.28628  | C | 1 |
| 2  | 0.197663 | C | 1 |
| 7  | 0.282978 | C | 1 |
| 7  | 0.28628  | C | 1 |
| 7  | 0.28628  | C | 1 |
| 7  | 0.282978 | C | 1 |
| 7  | 0.28628  | C | 1 |
| 7  | 0.28628  | C | 1 |
| 2  | 0.197663 | C | 1 |
| 7  | 0.282978 | C | 1 |
| 2  | 0.197663 | C | 1 |
| 7  | 0.28628  | C | 1 |
| 7  | 0.282978 | C | 1 |
| 5  | 0.279399 | C | 1 |
| 2  | 0.197663 | C | 1 |
| 7  | 0.282978 | C | 1 |
| 5  | 0.279399 | C | 1 |
| 5  | 0.279399 | C | 1 |
| 7  | 0.28628  | C | 1 |
| 7  | 0.28628  | C | 1 |
| 2  | 0.197663 | C | 1 |
| 2  | 0.197663 | C | 1 |
| 7  | 0.282978 | C | 1 |
| 2  | 0.197663 | C | 1 |
| 7  | 0.28628  | C | 1 |
| 7  | 0.28628  | C | 1 |
| 7  | 0.156917 | I | 0 |
| 20 | 0.44567  | C | 1 |
| 7  | 0.156917 | I | 0 |
| 23 | 0.30809  | S | 0 |
| 20 | 0.44567  | C | 1 |
| 8  | 0.677844 | E | 1 |
| 7  | 0.482456 | C | 1 |
| 23 | 0.30809  | S | 0 |
| 7  | 0.156917 | I | 0 |
| 7  | 0.482456 | C | 1 |
| 7  | 0.482456 | C | 1 |
| 7  | 0.482456 | C | 1 |
| 20 | 0.44567  | C | 1 |
| 23 | 0.30809  | S | 0 |
| 23 | 0.30809  | S | 0 |
| 23 | 0.30809  | S | 0 |
| 23 | 0.30809  | S | 0 |
| 7  | 0.156917 | I | 0 |

|    |          |   |   |
|----|----------|---|---|
| 7  | 0.156917 | I | 0 |
| 7  | 0.156917 | I | 0 |
| 7  | 0.156917 | I | 0 |
| 20 | 0.44567  | C | 1 |
| 23 | 0.30809  | S | 0 |
| 8  | 0.677844 | E | 1 |
| 7  | 0.156917 | I | 0 |
| 7  | 0.156917 | I | 0 |
| 7  | 0.482456 | C | 1 |
| 8  | 0.677844 | E | 1 |
| 23 | 0.30809  | S | 0 |
| 20 | 0.44567  | C | 1 |
| 8  | 0.677844 | E | 1 |
| 8  | 0.677844 | E | 1 |
| 23 | 0.30809  | S | 0 |
| 8  | 0.677844 | E | 1 |
| 7  | 0.482456 | C | 1 |
| 20 | 0.44567  | C | 1 |
| 7  | 0.482456 | C | 1 |
| 7  | 0.482456 | C | 1 |
| 7  | 0.482456 | C | 1 |
| 8  | 0.677844 | E | 1 |
| 20 | 0.44567  | C | 1 |
| 7  | 0.156917 | I | 0 |
| 7  | 0.156917 | I | 0 |
| 7  | 0.156917 | I | 0 |
| 8  | 0.677844 | E | 1 |
| 7  | 0.156917 | I | 0 |
| 7  | 0.156917 | I | 0 |
| 23 | 0.30809  | S | 0 |
| 23 | 0.30809  | S | 0 |
| 7  | 0.482456 | C | 1 |
| 23 | 0.30809  | S | 0 |
| 7  | 0.482456 | C | 1 |
| 20 | 0.591054 | C | 1 |
| 20 | 0.591054 | C | 1 |
| 20 | 0.591054 | C | 1 |
| 20 | 0.591054 | C | 1 |
| 20 | 0.591054 | C | 1 |
| 20 | 0.591054 | C | 1 |
| 7  | 0.58339  | C | 1 |
| 7  | 0.58339  | C | 1 |
| 7  | 0.58339  | C | 1 |
| 7  | 0.58339  | C | 1 |
| 1  | 0.111309 | C | 1 |
| 7  | 0.58339  | C | 1 |
| 1  | 0.111309 | C | 1 |
| 1  | 0.111309 | C | 1 |
| 1  | 0.111309 | C | 1 |
| 1  | 0.111309 | C | 1 |
| 7  | 0.58339  | C | 1 |
| 7  | 0.58339  | C | 1 |
| 17 | 0.456908 | C | 1 |
| 19 | 0.556243 | C | 1 |



|    |          |   |   |
|----|----------|---|---|
| 17 | 0.456908 | C | 1 |
| 19 | 0.556243 | C | 1 |
| 19 | 0.556243 | C | 1 |
| 17 | 0.456908 | C | 1 |
| 17 | 0.456908 | C | 1 |
| 17 | 0.456908 | C | 1 |
| 17 | 0.456908 | C | 1 |
| 17 | 0.456908 | C | 1 |
| 19 | 0.556243 | C | 1 |
| 19 | 0.556243 | C | 1 |
| 19 | 0.556243 | C | 1 |
| 19 | 0.556243 | C | 1 |
| 14 | 0.591677 | C | 1 |
| 17 | 0.46281  | C | 1 |
| 6  | 0.593684 | C | 1 |
| 20 | 0.419293 | L | 0 |
| 13 | 0.731878 | F | 0 |
| 9  | 0.33137  | C | 1 |
| 6  | 0.458477 | C | 1 |
| 13 | 0.230256 | C | 1 |
| 18 | 0.205673 | C | 1 |
| 9  | 0.638635 | C | 1 |
| 7  | 0.19436  | C | 1 |
| 13 | 0.42375  | C | 1 |
| 2  | 0.500013 | C | 1 |
| 7  | 0.318323 | C | 1 |
| 2  | 0.500013 | C | 1 |
| 7  | 0.318323 | C | 1 |
| 7  | 0.19436  | C | 1 |
| 6  | 0.15061  | C | 1 |
| 1  | 0.258096 | C | 1 |
| 5  | 0.232656 | R | 0 |
| 13 | 0.679482 | C | 1 |
| 13 | 0.679482 | C | 1 |
| 14 | 0.591677 | C | 1 |
| 20 | 0.322559 | F | 0 |
| 11 | 0.349837 | C | 1 |
| 17 | 0.46281  | C | 1 |
| 13 | 0.679482 | C | 1 |
| 6  | 0.458477 | C | 1 |
| 15 | 0.715116 | C | 1 |
| 7  | 0.19436  | C | 1 |
| 5  | 0.38503  | C | 1 |
| 5  | 0.38503  | C | 1 |
| 5  | 0.38503  | C | 1 |
| 11 | 0.349837 | C | 1 |
| 14 | 0.591677 | C | 1 |
| 12 | 0.358174 | C | 1 |
| 13 | 0.679482 | C | 1 |
| 13 | 0.42375  | C | 1 |
| 13 | 0.731878 | F | 0 |
| 15 | 0.639548 | C | 1 |
| 7  | 0.19436  | C | 1 |
| 20 | 0.136639 | C | 1 |

|    |          |   |   |
|----|----------|---|---|
| 15 | 0.639548 | C | 1 |
| 1  | 0.258096 | C | 1 |
| 15 | 0.715116 | C | 1 |
| 6  | 0.458477 | C | 1 |
| 17 | 0.46281  | C | 1 |
| 9  | 0.124712 | C | 1 |
| 7  | 0.609442 | E | 1 |
| 3  | 0.236202 | C | 1 |
| 6  | 0.191813 | C | 1 |
| 20 | 0.136639 | C | 1 |
| 18 | 0.205673 | C | 1 |
| 13 | 0.230256 | C | 1 |
| 13 | 0.42375  | C | 1 |
| 20 | 0.136639 | C | 1 |
| 9  | 0.638635 | C | 1 |
| 18 | 0.645625 | K | 1 |
| 15 | 0.639548 | C | 1 |
| 15 | 0.639548 | C | 1 |
| 15 | 0.639548 | C | 1 |
| 20 | 0.419293 | L | 0 |
| 15 | 0.639548 | C | 1 |
| 12 | 0.358174 | C | 1 |
| 15 | 0.639548 | C | 1 |
| 20 | 0.278657 | C | 1 |
| 15 | 0.639548 | C | 1 |
| 13 | 0.191361 | C | 1 |
| 1  | 0.258096 | C | 1 |
| 18 | 0.205673 | C | 1 |
| 5  | 0.38503  | C | 1 |
| 9  | 0.638635 | C | 1 |
| 15 | 0.639548 | C | 1 |
| 18 | 0.205673 | C | 1 |
| 11 | 0.349837 | C | 1 |
| 13 | 0.679482 | C | 1 |
| 18 | 0.645625 | K | 1 |
| 20 | 0.136639 | C | 1 |
| 20 | 0.136639 | C | 1 |
| 13 | 0.731878 | F | 0 |
| 7  | 0.609442 | E | 1 |
| 13 | 0.679482 | C | 1 |
| 14 | 0.591677 | C | 1 |
| 14 | 0.591677 | C | 1 |
| 14 | 0.591677 | C | 1 |
| 14 | 0.591677 | C | 1 |
| 7  | 0.19436  | C | 1 |
| 6  | 0.20528  | C | 1 |
| 14 | 0.591677 | C | 1 |
| 15 | 0.639548 | C | 1 |
| 2  | 0.202486 | C | 1 |
| 13 | 0.191361 | C | 1 |
| 6  | 0.593684 | C | 1 |
| 13 | 0.42375  | C | 1 |
| 11 | 0.349837 | C | 1 |
| 2  | 0.522377 | F | 0 |

|    |          |   |   |
|----|----------|---|---|
| 5  | 0.232656 | R | 0 |
| 7  | 0.609442 | E | 1 |
| 2  | 0.522377 | F | 0 |
| 15 | 0.715116 | C | 1 |
| 12 | 0.358174 | C | 1 |
| 5  | 0.525719 | C | 1 |
| 11 | 0.349837 | C | 1 |
| 17 | 0.46281  | C | 1 |
| 14 | 0.591677 | C | 1 |
| 15 | 0.715116 | C | 1 |
| 5  | 0.38503  | C | 1 |
| 5  | 0.525719 | C | 1 |
| 13 | 0.230256 | C | 1 |
| 7  | 0.19436  | C | 1 |
| 9  | 0.33137  | C | 1 |
| 15 | 0.639548 | C | 1 |
| 7  | 0.318323 | C | 1 |
| 13 | 0.191361 | C | 1 |
| 9  | 0.124712 | C | 1 |
| 14 | 0.591677 | C | 1 |
| 6  | 0.15061  | C | 1 |
| 20 | 0.278657 | C | 1 |
| 5  | 0.525719 | C | 1 |
| 13 | 0.679482 | C | 1 |
| 13 | 0.191361 | C | 1 |
| 17 | 0.46281  | C | 1 |
| 15 | 0.715116 | C | 1 |
| 17 | 0.46281  | C | 1 |
| 17 | 0.46281  | C | 1 |
| 1  | 0.258096 | C | 1 |
| 20 | 0.136639 | C | 1 |
| 12 | 0.358174 | C | 1 |
| 13 | 0.679482 | C | 1 |
| 20 | 0.278657 | C | 1 |
| 6  | 0.191813 | C | 1 |
| 15 | 0.639548 | C | 1 |
| 6  | 0.593684 | C | 1 |
| 13 | 0.731878 | F | 0 |
| 13 | 0.230256 | C | 1 |
| 3  | 0.236202 | C | 1 |
| 15 | 0.715116 | C | 1 |
| 6  | 0.458477 | C | 1 |
| 12 | 0.358174 | C | 1 |
| 18 | 0.205673 | C | 1 |
| 17 | 0.46281  | C | 1 |
| 13 | 0.230256 | C | 1 |
| 20 | 0.136639 | C | 1 |
| 3  | 0.236202 | C | 1 |
| 13 | 0.731878 | F | 0 |
| 13 | 0.230256 | C | 1 |
| 3  | 0.236202 | C | 1 |
| 11 | 0.349837 | C | 1 |
| 6  | 0.458477 | C | 1 |
| 6  | 0.191813 | C | 1 |

|    |          |   |   |
|----|----------|---|---|
| 6  | 0.458477 | C | 1 |
| 20 | 0.278657 | C | 1 |
| 6  | 0.20528  | C | 1 |
| 13 | 0.230256 | C | 1 |
| 5  | 0.38503  | C | 1 |
| 9  | 0.33137  | C | 1 |
| 6  | 0.593684 | C | 1 |
| 9  | 0.638635 | C | 1 |
| 5  | 0.38503  | C | 1 |
| 20 | 0.322559 | F | 0 |
| 6  | 0.15061  | C | 1 |
| 6  | 0.458477 | C | 1 |
| 2  | 0.202486 | C | 1 |
| 15 | 0.715116 | C | 1 |
| 15 | 0.715116 | C | 1 |
| 13 | 0.679482 | C | 1 |
| 14 | 0.591677 | C | 1 |
| 15 | 0.639548 | C | 1 |
| 5  | 0.232656 | R | 0 |
| 7  | 0.609442 | E | 1 |
| 5  | 0.232656 | R | 0 |
| 7  | 0.318323 | C | 1 |
| 6  | 0.20528  | C | 1 |
| 2  | 0.522377 | F | 0 |
| 14 | 0.591677 | C | 1 |
| 14 | 0.591677 | C | 1 |
| 17 | 0.46281  | C | 1 |
| 7  | 0.609442 | E | 1 |
| 11 | 0.349837 | C | 1 |
| 12 | 0.358174 | C | 1 |
| 11 | 0.349837 | C | 1 |
| 6  | 0.20528  | C | 1 |
| 11 | 0.349837 | C | 1 |
| 14 | 0.591677 | C | 1 |
| 9  | 0.124712 | C | 1 |
| 13 | 0.191361 | C | 1 |
| 11 | 0.349837 | C | 1 |
| 14 | 0.591677 | C | 1 |
| 11 | 0.349837 | C | 1 |
| 13 | 0.42375  | C | 1 |
| 9  | 0.33137  | C | 1 |
| 20 | 0.322559 | F | 0 |
| 13 | 0.230256 | C | 1 |
| 7  | 0.609442 | E | 1 |
| 13 | 0.230256 | C | 1 |
| 15 | 0.639548 | C | 1 |
| 20 | 0.278657 | C | 1 |
| 7  | 0.609442 | E | 1 |
| 20 | 0.136639 | C | 1 |
| 5  | 0.232656 | R | 0 |
| 13 | 0.731878 | F | 0 |
| 15 | 0.715116 | C | 1 |
| 6  | 0.593684 | C | 1 |
| 6  | 0.458477 | C | 1 |

|    |          |   |   |
|----|----------|---|---|
| 13 | 0.679482 | C | 1 |
| 13 | 0.679482 | C | 1 |
| 6  | 0.20528  | C | 1 |
| 12 | 0.358174 | C | 1 |
| 5  | 0.232656 | R | 0 |
| 7  | 0.19436  | C | 1 |
| 13 | 0.679482 | C | 1 |
| 3  | 0.106863 | C | 1 |
| 9  | 0.124712 | C | 1 |
| 12 | 0.358174 | C | 1 |
| 12 | 0.358174 | C | 1 |
| 9  | 0.33137  | C | 1 |
| 9  | 0.638635 | C | 1 |
| 1  | 0.258096 | C | 1 |
| 13 | 0.679482 | C | 1 |
| 9  | 0.33137  | C | 1 |
| 5  | 0.525719 | C | 1 |
| 18 | 0.205673 | C | 1 |
| 7  | 0.318323 | C | 1 |
| 20 | 0.278657 | C | 1 |
| 6  | 0.593684 | C | 1 |
| 20 | 0.136639 | C | 1 |
| 14 | 0.591677 | C | 1 |
| 7  | 0.19436  | C | 1 |
| 13 | 0.679482 | C | 1 |
| 12 | 0.358174 | C | 1 |
| 9  | 0.638635 | C | 1 |
| 20 | 0.419293 | L | 0 |
| 11 | 0.349837 | C | 1 |
| 3  | 0.236202 | C | 1 |
| 3  | 0.106863 | C | 1 |
| 12 | 0.358174 | C | 1 |
| 5  | 0.525719 | C | 1 |
| 13 | 0.679482 | C | 1 |
| 13 | 0.230256 | C | 1 |
| 6  | 0.191813 | C | 1 |
| 7  | 0.19436  | C | 1 |
| 13 | 0.191361 | C | 1 |
| 15 | 0.715116 | C | 1 |
| 7  | 0.19436  | C | 1 |
| 9  | 0.638635 | C | 1 |
| 9  | 0.638635 | C | 1 |
| 9  | 0.638635 | C | 1 |
| 7  | 0.19436  | C | 1 |
| 13 | 0.230256 | C | 1 |
| 2  | 0.500013 | C | 1 |
| 5  | 0.38503  | C | 1 |
| 6  | 0.593684 | C | 1 |
| 6  | 0.593684 | C | 1 |
| 13 | 0.679482 | C | 1 |
| 5  | 0.232656 | R | 0 |
| 5  | 0.525719 | C | 1 |
| 5  | 0.525719 | C | 1 |
| 9  | 0.638635 | C | 1 |

|    |          |   |   |
|----|----------|---|---|
| 3  | 0.106863 | C | 1 |
| 15 | 0.639548 | C | 1 |
| 12 | 0.358174 | C | 1 |
| 7  | 0.19436  | C | 1 |
| 13 | 0.679482 | C | 1 |
| 5  | 0.525719 | C | 1 |
| 14 | 0.591677 | C | 1 |
| 3  | 0.106863 | C | 1 |
| 13 | 0.679482 | C | 1 |
| 13 | 0.191361 | C | 1 |
| 13 | 0.679482 | C | 1 |
| 12 | 0.358174 | C | 1 |
| 7  | 0.19436  | C | 1 |
| 7  | 0.19436  | C | 1 |
| 20 | 0.419293 | L | 0 |
| 7  | 0.19436  | C | 1 |
| 13 | 0.679482 | C | 1 |
| 13 | 0.230256 | C | 1 |
| 15 | 0.639548 | C | 1 |
| 1  | 0.258096 | C | 1 |
| 13 | 0.679482 | C | 1 |
| 13 | 0.679482 | C | 1 |
| 13 | 0.42375  | C | 1 |
| 7  | 0.609442 | E | 1 |
| 7  | 0.609442 | E | 1 |
| 5  | 0.525719 | C | 1 |
| 7  | 0.609442 | E | 1 |
| 15 | 0.715116 | C | 1 |
| 13 | 0.679482 | C | 1 |
| 13 | 0.230256 | C | 1 |
| 17 | 0.46281  | C | 1 |
| 15 | 0.715116 | C | 1 |
| 13 | 0.679482 | C | 1 |
| 13 | 0.191361 | C | 1 |
| 6  | 0.593684 | C | 1 |
| 14 | 0.591677 | C | 1 |
| 13 | 0.679482 | C | 1 |
| 9  | 0.124712 | C | 1 |
| 6  | 0.458477 | C | 1 |
| 7  | 0.609442 | E | 1 |
| 15 | 0.639548 | C | 1 |
| 13 | 0.679482 | C | 1 |
| 15 | 0.639548 | C | 1 |
| 13 | 0.191361 | C | 1 |
| 17 | 0.46281  | C | 1 |
| 13 | 0.42375  | C | 1 |
| 18 | 0.645625 | K | 1 |
| 5  | 0.525719 | C | 1 |
| 11 | 0.349837 | C | 1 |
| 9  | 0.124712 | C | 1 |
| 6  | 0.458477 | C | 1 |
| 13 | 0.679482 | C | 1 |
| 5  | 0.38503  | C | 1 |
| 14 | 0.591677 | C | 1 |

|    |          |   |   |
|----|----------|---|---|
| 6  | 0.191813 | C | 1 |
| 20 | 0.278657 | C | 1 |
| 6  | 0.20528  | C | 1 |
| 20 | 0.278657 | C | 1 |
| 3  | 0.106863 | C | 1 |
| 13 | 0.42375  | C | 1 |
| 15 | 0.639548 | C | 1 |
| 6  | 0.593684 | C | 1 |
| 7  | 0.19436  | C | 1 |
| 11 | 0.349837 | C | 1 |
| 15 | 0.715116 | C | 1 |
| 6  | 0.458477 | C | 1 |
| 3  | 0.236202 | C | 1 |
| 5  | 0.525719 | C | 1 |
| 9  | 0.638635 | C | 1 |
| 7  | 0.318323 | C | 1 |
| 18 | 0.205673 | C | 1 |
| 9  | 0.33137  | C | 1 |
| 13 | 0.679482 | C | 1 |
| 6  | 0.458477 | C | 1 |
| 2  | 0.202486 | C | 1 |
| 12 | 0.358174 | C | 1 |
| 3  | 0.106863 | C | 1 |
| 13 | 0.679482 | C | 1 |
| 6  | 0.223054 | C | 1 |
| 23 | 0.681199 | C | 1 |
| 23 | 0.681199 | C | 1 |
| 19 | 0.526438 | C | 1 |
| 9  | 0.38275  | C | 1 |
| 19 | 0.38201  | C | 1 |
| 9  | 0.38275  | C | 1 |
| 2  | 0.267918 | C | 1 |
| 23 | 0.681199 | C | 1 |
| 19 | 0.38201  | C | 1 |
| 23 | 0.681199 | C | 1 |
| 9  | 0.38275  | C | 1 |
| 6  | 0.223054 | C | 1 |
| 23 | 0.681199 | C | 1 |
| 23 | 0.681199 | C | 1 |
| 23 | 0.681199 | C | 1 |
| 2  | 0.267918 | C | 1 |
| 19 | 0.38201  | C | 1 |
| 6  | 0.223054 | C | 1 |
| 19 | 0.526438 | C | 1 |
| 19 | 0.526438 | C | 1 |
| 6  | 0.223054 | C | 1 |
| 19 | 0.526438 | C | 1 |
| 23 | 0.681199 | C | 1 |
| 23 | 0.681199 | C | 1 |
| 23 | 0.681199 | C | 1 |
| 19 | 0.38201  | C | 1 |
| 9  | 0.38275  | C | 1 |
| 19 | 0.526438 | C | 1 |
| 19 | 0.526438 | C | 1 |

|    |          |   |   |
|----|----------|---|---|
| 9  | 0.38275  | C | 1 |
| 2  | 0.267918 | C | 1 |
| 23 | 0.681199 | C | 1 |
| 23 | 0.681199 | C | 1 |
| 23 | 0.681199 | C | 1 |
| 23 | 0.681199 | C | 1 |
| 23 | 0.681199 | C | 1 |
| 23 | 0.681199 | C | 1 |
| 23 | 0.681199 | C | 1 |
| 19 | 0.38201  | C | 1 |
| 19 | 0.38201  | C | 1 |
| 19 | 0.38201  | C | 1 |
| 23 | 0.681199 | C | 1 |
| 6  | 0.223054 | C | 1 |
| 19 | 0.526438 | C | 1 |
| 23 | 0.681199 | C | 1 |
| 9  | 0.38275  | C | 1 |
| 6  | 0.223054 | C | 1 |
| 19 | 0.526438 | C | 1 |
| 23 | 0.681199 | C | 1 |
| 23 | 0.681199 | C | 1 |
| 2  | 0.267918 | C | 1 |
| 23 | 0.681199 | C | 1 |
| 6  | 0.223054 | C | 1 |
| 19 | 0.526438 | C | 1 |
| 23 | 0.681199 | C | 1 |
| 23 | 0.681199 | C | 1 |
| 23 | 0.681199 | C | 1 |
| 6  | 0.223054 | C | 1 |
| 23 | 0.681199 | C | 1 |
| 2  | 0.267918 | C | 1 |
| 19 | 0.38201  | C | 1 |
| 19 | 0.526438 | C | 1 |
| 23 | 0.681199 | C | 1 |
| 23 | 0.681199 | C | 1 |
| 6  | 0.223054 | C | 1 |
| 19 | 0.38201  | C | 1 |
| 2  | 0.267918 | C | 1 |
| 23 | 0.681199 | C | 1 |
| 23 | 0.681199 | C | 1 |
| 19 | 0.38201  | C | 1 |
| 23 | 0.681199 | C | 1 |
| 23 | 0.681199 | C | 1 |
| 19 | 0.526438 | C | 1 |
| 9  | 0.38275  | C | 1 |
| 19 | 0.38201  | C | 1 |
| 19 | 0.526438 | C | 1 |
| 23 | 0.681199 | C | 1 |
| 23 | 0.681199 | C | 1 |
| 23 | 0.681199 | C | 1 |
| 9  | 0.38275  | C | 1 |
| 19 | 0.526438 | C | 1 |
| 23 | 0.681199 | C | 1 |
| 19 | 0.38201  | C | 1 |



|    |          |   |   |
|----|----------|---|---|
| 6  | 0.223054 | C | 1 |
| 23 | 0.681199 | C | 1 |
| 23 | 0.681199 | C | 1 |
| 23 | 0.681199 | C | 1 |
| 23 | 0.681199 | C | 1 |
| 2  | 0.267918 | C | 1 |
| 23 | 0.681199 | C | 1 |
| 19 | 0.38201  | C | 1 |
| 21 | 0.202369 | C | 1 |
| 7  | 0.472991 | C | 1 |
| 7  | 0.472991 | C | 1 |
| 17 | 0.775891 | C | 1 |
| 7  | 0.472991 | C | 1 |
| 19 | 0.622247 | C | 1 |
| 19 | 0.622247 | C | 1 |
| 19 | 0.622247 | C | 1 |
| 19 | 0.622247 | C | 1 |
| 21 | 0.202369 | C | 1 |
| 19 | 0.622247 | C | 1 |
| 21 | 0.202369 | C | 1 |
| 19 | 0.622247 | C | 1 |
| 19 | 0.622247 | C | 1 |
| 21 | 0.202369 | C | 1 |
| 7  | 0.472991 | C | 1 |
| 19 | 0.622247 | C | 1 |
| 21 | 0.202369 | C | 1 |
| 7  | 0.472991 | C | 1 |
| 17 | 0.775891 | C | 1 |
| 19 | 0.622247 | C | 1 |
| 21 | 0.202369 | C | 1 |
| 17 | 0.775891 | C | 1 |
| 21 | 0.202369 | C | 1 |
| 19 | 0.622247 | C | 1 |
| 19 | 0.622247 | C | 1 |
| 21 | 0.202369 | C | 1 |
| 17 | 0.775891 | C | 1 |
| 19 | 0.622247 | C | 1 |
| 19 | 0.622247 | C | 1 |
| 19 | 0.622247 | C | 1 |
| 19 | 0.622247 | C | 1 |
| 17 | 0.775891 | C | 1 |
| 7  | 0.472991 | C | 1 |
| 21 | 0.202369 | C | 1 |
| 19 | 0.622247 | C | 1 |
| 17 | 0.775891 | C | 1 |
| 19 | 0.622247 | C | 1 |
| 19 | 0.622247 | C | 1 |
| 7  | 0.472991 | C | 1 |
| 7  | 0.447143 | L | 0 |
| 3  | 0.317987 | C | 1 |
| 6  | 0.581952 | C | 1 |
| 11 | 0.41861  | C | 1 |
| 21 | 0.276182 | C | 1 |

|    |          |   |   |
|----|----------|---|---|
| 7  | 0.447143 | L | 0 |
| 1  | 0.402444 | C | 1 |
| 7  | 0.447143 | L | 0 |
| 7  | 0.447143 | L | 0 |
| 21 | 0.276182 | C | 1 |
| 23 | 0.368999 | C | 1 |
| 1  | 0.402444 | C | 1 |
| 11 | 0.41861  | C | 1 |
| 23 | 0.368999 | C | 1 |
| 11 | 0.41861  | C | 1 |
| 21 | 0.276182 | C | 1 |
| 11 | 0.41861  | C | 1 |
| 7  | 0.447143 | L | 0 |
| 11 | 0.41861  | C | 1 |
| 7  | 0.447143 | L | 0 |
| 21 | 0.276182 | C | 1 |
| 21 | 0.276182 | C | 1 |
| 21 | 0.276182 | C | 1 |
| 1  | 0.402444 | C | 1 |
| 21 | 0.276182 | C | 1 |
| 21 | 0.276182 | C | 1 |
| 21 | 0.276182 | C | 1 |
| 1  | 0.402444 | C | 1 |
| 11 | 0.41861  | C | 1 |
| 6  | 0.581952 | C | 1 |
| 21 | 0.276182 | C | 1 |
| 3  | 0.317987 | C | 1 |
| 11 | 0.41861  | C | 1 |
| 6  | 0.581952 | C | 1 |
| 11 | 0.41861  | C | 1 |
| 21 | 0.276182 | C | 1 |
| 21 | 0.276182 | C | 1 |
| 1  | 0.402444 | C | 1 |
| 7  | 0.447143 | L | 0 |
| 11 | 0.41861  | C | 1 |
| 23 | 0.368999 | C | 1 |
| 21 | 0.276182 | C | 1 |
| 6  | 0.581952 | C | 1 |
| 7  | 0.447143 | L | 0 |
| 23 | 0.368999 | C | 1 |
| 1  | 0.402444 | C | 1 |
| 11 | 0.41861  | C | 1 |
| 21 | 0.276182 | C | 1 |
| 3  | 0.317987 | C | 1 |
| 6  | 0.581952 | C | 1 |
| 1  | 0.402444 | C | 1 |
| 11 | 0.41861  | C | 1 |
| 7  | 0.447143 | L | 0 |
| 23 | 0.368999 | C | 1 |
| 21 | 0.276182 | C | 1 |
| 11 | 0.41861  | C | 1 |
| 6  | 0.765067 | C | 1 |
| 6  | 0.765067 | C | 1 |
| 16 | 0.274993 | C | 1 |

|    |          |   |   |
|----|----------|---|---|
| 9  | 0.252606 | C | 1 |
| 16 | 0.274993 | C | 1 |
| 6  | 0.765067 | C | 1 |
| 6  | 0.765067 | C | 1 |
| 6  | 0.765067 | C | 1 |
| 16 | 0.274993 | C | 1 |
| 16 | 0.274993 | C | 1 |
| 9  | 0.252606 | C | 1 |
| 9  | 0.252606 | C | 1 |
| 9  | 0.252606 | C | 1 |
| 6  | 0.765067 | C | 1 |
| 6  | 0.765067 | C | 1 |
| 9  | 0.252606 | C | 1 |
| 6  | 0.765067 | C | 1 |
| 9  | 0.252606 | C | 1 |
| 16 | 0.274993 | C | 1 |
| 6  | 0.765067 | C | 1 |
| 16 | 0.274993 | C | 1 |
| 6  | 0.765067 | C | 1 |
| 16 | 0.274993 | C | 1 |
| 16 | 0.274993 | C | 1 |
| 16 | 0.274993 | C | 1 |
| 9  | 0.252606 | C | 1 |
| 6  | 0.765067 | C | 1 |
| 6  | 0.765067 | C | 1 |
| 21 | 0.252183 | C | 1 |
| 7  | 0.413153 | C | 1 |
| 17 | 0.380292 | C | 1 |
| 8  | 0.236733 | I | 0 |
| 8  | 0.236733 | I | 0 |
| 7  | 0.413153 | C | 1 |
| 8  | 0.236733 | I | 0 |
| 10 | 0.274681 | C | 1 |
| 10 | 0.274681 | C | 1 |
| 7  | 0.413153 | C | 1 |
| 10 | 0.274681 | C | 1 |
| 8  | 0.236733 | I | 0 |
| 8  | 0.236733 | I | 0 |
| 17 | 0.380292 | C | 1 |
| 17 | 0.380292 | C | 1 |
| 21 | 0.252183 | C | 1 |
| 7  | 0.38388  | C | 1 |
| 7  | 0.38388  | C | 1 |
| 8  | 0.236733 | I | 0 |
| 21 | 0.252183 | C | 1 |
| 7  | 0.38388  | C | 1 |
| 17 | 0.559038 | C | 1 |
| 7  | 0.38388  | C | 1 |
| 7  | 0.413153 | C | 1 |
| 17 | 0.380292 | C | 1 |
| 7  | 0.38388  | C | 1 |
| 17 | 0.559038 | C | 1 |
| 7  | 0.413153 | C | 1 |
| 7  | 0.413153 | C | 1 |

|    |          |   |   |
|----|----------|---|---|
| 6  | 0.204525 | I | 0 |
| 7  | 0.38388  | C | 1 |
| 17 | 0.559038 | C | 1 |
| 10 | 0.274681 | C | 1 |
| 7  | 0.413153 | C | 1 |
| 6  | 0.204525 | I | 0 |
| 10 | 0.274681 | C | 1 |
| 10 | 0.274681 | C | 1 |
| 7  | 0.38388  | C | 1 |
| 8  | 0.236733 | I | 0 |
| 17 | 0.380292 | C | 1 |
| 7  | 0.38388  | C | 1 |
| 21 | 0.252183 | C | 1 |
| 21 | 0.252183 | C | 1 |
| 7  | 0.413153 | C | 1 |
| 10 | 0.274681 | C | 1 |
| 8  | 0.236733 | I | 0 |
| 7  | 0.413153 | C | 1 |
| 6  | 0.204525 | I | 0 |
| 17 | 0.380292 | C | 1 |
| 17 | 0.559038 | C | 1 |
| 21 | 0.252183 | C | 1 |
| 10 | 0.274681 | C | 1 |
| 8  | 0.236733 | I | 0 |
| 17 | 0.380292 | C | 1 |
| 6  | 0.204525 | I | 0 |
| 7  | 0.413153 | C | 1 |
| 21 | 0.252183 | C | 1 |
| 8  | 0.236733 | I | 0 |
| 7  | 0.413153 | C | 1 |
| 6  | 0.204525 | I | 0 |
| 7  | 0.413153 | C | 1 |
| 10 | 0.274681 | C | 1 |
| 7  | 0.413153 | C | 1 |
| 8  | 0.236733 | I | 0 |
| 7  | 0.413153 | C | 1 |
| 21 | 0.252183 | C | 1 |
| 10 | 0.274681 | C | 1 |
| 17 | 0.559038 | C | 1 |
| 17 | 0.559038 | C | 1 |
| 8  | 0.236733 | I | 0 |
| 8  | 0.236733 | I | 0 |
| 17 | 0.559038 | C | 1 |
| 8  | 0.236733 | I | 0 |
| 6  | 0.560236 | C | 1 |
| 3  | 0.571873 | C | 1 |
| 14 | 0.608106 | C | 1 |
| 14 | 0.608106 | C | 1 |
| 8  | 0.342155 | G | 0 |
| 23 | 0.49669  | S | 0 |
| 7  | 0.461836 | C | 1 |
| 3  | 0.571873 | C | 1 |
| 6  | 0.276898 | C | 1 |
| 7  | 0.647614 | C | 1 |

|    |          |   |   |
|----|----------|---|---|
| 7  | 0.647614 | C | 1 |
| 14 | 0.608106 | C | 1 |
| 10 | 0.196405 | C | 1 |
| 8  | 0.70903  | C | 1 |
| 7  | 0.473785 | C | 1 |
| 8  | 0.70903  | C | 1 |
| 9  | 0.443052 | G | 0 |
| 20 | 0.377156 | C | 1 |
| 23 | 0.49669  | S | 0 |
| 10 | 0.196405 | C | 1 |
| 1  | 0.072387 | C | 1 |
| 7  | 0.473785 | C | 1 |
| 10 | 0.692531 | C | 1 |
| 10 | 0.692531 | C | 1 |
| 7  | 0.473785 | C | 1 |
| 7  | 0.512936 | C | 1 |
| 7  | 0.449545 | C | 1 |
| 2  | 0.428197 | C | 1 |
| 18 | 0.367496 | S | 0 |
| 14 | 0.608106 | C | 1 |
| 7  | 0.473785 | C | 1 |
| 7  | 0.302163 | C | 1 |
| 11 | 0.179011 | C | 1 |
| 9  | 0.443052 | G | 0 |
| 6  | 0.658413 | C | 1 |
| 7  | 0.325331 | C | 1 |
| 8  | 0.70903  | C | 1 |
| 7  | 0.461836 | C | 1 |
| 11 | 0.518546 | F | 0 |
| 5  | 0.646628 | C | 1 |
| 14 | 0.608106 | C | 1 |
| 3  | 0.571873 | C | 1 |
| 7  | 0.461449 | C | 1 |
| 3  | 0.179886 | C | 1 |
| 14 | 0.608106 | C | 1 |
| 7  | 0.512936 | C | 1 |
| 5  | 0.646628 | C | 1 |
| 20 | 0.365988 | C | 1 |
| 2  | 0.343128 | C | 1 |
| 8  | 0.70903  | C | 1 |
| 7  | 0.461836 | C | 1 |
| 11 | 0.518546 | F | 0 |
| 6  | 0.658413 | C | 1 |
| 18 | 0.367496 | S | 0 |
| 8  | 0.70903  | C | 1 |
| 7  | 0.512936 | C | 1 |
| 1  | 0.51501  | C | 1 |
| 9  | 0.486502 | C | 1 |
| 7  | 0.506906 | C | 1 |
| 2  | 0.257214 | C | 1 |
| 3  | 0.221024 | C | 1 |
| 6  | 0.133071 | C | 1 |
| 7  | 0.647614 | C | 1 |
| 7  | 0.417886 | C | 1 |

|    |          |   |   |
|----|----------|---|---|
| 14 | 0.608106 | C | 1 |
| 7  | 0.449545 | C | 1 |
| 7  | 0.647614 | C | 1 |
| 2  | 0.257214 | C | 1 |
| 8  | 0.70903  | C | 1 |
| 7  | 0.461836 | C | 1 |
| 6  | 0.386833 | C | 1 |
| 10 | 0.49702  | C | 1 |
| 8  | 0.70903  | C | 1 |
| 7  | 0.449545 | C | 1 |
| 1  | 0.200205 | C | 1 |
| 3  | 0.389882 | M | 0 |
| 14 | 0.608106 | C | 1 |
| 6  | 0.860102 | M | 0 |
| 1  | 0.400572 | E | 1 |
| 6  | 0.223005 | C | 1 |
| 6  | 0.251469 | C | 1 |
| 7  | 0.571445 | C | 1 |
| 5  | 0.613115 | C | 1 |
| 14 | 0.608106 | C | 1 |
| 1  | 0.072387 | C | 1 |
| 1  | 0.346529 | C | 1 |
| 10 | 0.49702  | C | 1 |
| 7  | 0.216252 | C | 1 |
| 5  | 0.220593 | I | 0 |
| 6  | 0.658413 | C | 1 |
| 2  | 0.372811 | C | 1 |
| 2  | 0.343128 | C | 1 |
| 10 | 0.201666 | L | 0 |
| 7  | 0.449545 | C | 1 |
| 3  | 0.571873 | C | 1 |
| 3  | 0.221024 | C | 1 |
| 6  | 0.223005 | C | 1 |
| 6  | 0.386833 | C | 1 |
| 6  | 0.560236 | C | 1 |
| 7  | 0.449545 | C | 1 |
| 7  | 0.093196 | C | 1 |
| 14 | 0.608106 | C | 1 |
| 6  | 0.133071 | C | 1 |
| 6  | 0.560236 | C | 1 |
| 14 | 0.608106 | C | 1 |
| 11 | 0.587437 | C | 1 |
| 7  | 0.216252 | C | 1 |
| 7  | 0.417886 | C | 1 |
| 9  | 0.486502 | C | 1 |
| 7  | 0.216252 | C | 1 |
| 8  | 0.70903  | C | 1 |
| 7  | 0.449545 | C | 1 |
| 3  | 0.38441  | C | 1 |
| 14 | 0.608106 | C | 1 |
| 7  | 0.571445 | C | 1 |
| 11 | 0.518546 | F | 0 |
| 11 | 0.363175 | C | 1 |
| 6  | 0.276898 | C | 1 |

|    |          |   |   |
|----|----------|---|---|
| 3  | 0.221024 | C | 1 |
| 8  | 0.70903  | C | 1 |
| 3  | 0.571873 | C | 1 |
| 1  | 0.307608 | I | 0 |
| 6  | 0.498347 | C | 1 |
| 6  | 0.223005 | C | 1 |
| 6  | 0.860102 | M | 0 |
| 7  | 0.647614 | C | 1 |
| 3  | 0.15267  | C | 1 |
| 3  | 0.179886 | C | 1 |
| 1  | 0.51501  | C | 1 |
| 6  | 0.276898 | C | 1 |
| 7  | 0.647614 | C | 1 |
| 10 | 0.49702  | C | 1 |
| 14 | 0.608106 | C | 1 |
| 7  | 0.473785 | C | 1 |
| 2  | 0.428197 | C | 1 |
| 8  | 0.342155 | G | 0 |
| 7  | 0.461449 | C | 1 |
| 5  | 0.613115 | C | 1 |
| 5  | 0.080126 | C | 1 |
| 14 | 0.608106 | C | 1 |
| 11 | 0.587437 | C | 1 |
| 14 | 0.608106 | C | 1 |
| 6  | 0.251469 | C | 1 |
| 5  | 0.239195 | C | 1 |
| 7  | 0.093196 | C | 1 |
| 20 | 0.365988 | C | 1 |
| 2  | 0.372811 | C | 1 |
| 7  | 0.512936 | C | 1 |
| 23 | 0.49669  | S | 0 |
| 7  | 0.571445 | C | 1 |
| 7  | 0.571445 | C | 1 |
| 3  | 0.15267  | C | 1 |
| 7  | 0.449545 | C | 1 |
| 5  | 0.646628 | C | 1 |
| 1  | 0.213852 | M | 0 |
| 23 | 0.49669  | S | 0 |
| 1  | 0.400572 | E | 1 |
| 11 | 0.583097 | E | 1 |
| 2  | 0.428197 | C | 1 |
| 7  | 0.4089   | C | 1 |
| 7  | 0.302163 | C | 1 |
| 10 | 0.49702  | C | 1 |
| 7  | 0.093196 | C | 1 |
| 7  | 0.916414 | C | 1 |
| 11 | 0.587437 | C | 1 |
| 8  | 0.342155 | G | 0 |
| 6  | 0.33906  | C | 1 |
| 6  | 0.251469 | C | 1 |
| 1  | 0.131548 | C | 1 |
| 1  | 0.286892 | C | 1 |
| 7  | 0.512936 | C | 1 |
| 9  | 0.443052 | G | 0 |

|    |          |   |   |
|----|----------|---|---|
| 11 | 0.587437 | C | 1 |
| 7  | 0.449545 | C | 1 |
| 7  | 0.506906 | C | 1 |
| 2  | 0.343128 | C | 1 |
| 7  | 0.449545 | C | 1 |
| 7  | 0.449545 | C | 1 |
| 10 | 0.201666 | L | 0 |
| 7  | 0.093196 | C | 1 |
| 6  | 0.473772 | M | 0 |
| 7  | 0.473785 | C | 1 |
| 7  | 0.4089   | C | 1 |
| 3  | 0.571873 | C | 1 |
| 2  | 0.372811 | C | 1 |
| 2  | 0.372811 | C | 1 |
| 11 | 0.363175 | C | 1 |
| 7  | 0.571445 | C | 1 |
| 6  | 0.404454 | C | 1 |
| 3  | 0.389882 | M | 0 |
| 11 | 0.518546 | F | 0 |
| 7  | 0.473785 | C | 1 |
| 1  | 0.213852 | M | 0 |
| 9  | 0.443052 | G | 0 |
| 9  | 0.443052 | G | 0 |
| 14 | 0.608106 | C | 1 |
| 23 | 0.49669  | S | 0 |
| 14 | 0.608106 | C | 1 |
| 14 | 0.608106 | C | 1 |
| 14 | 0.608106 | C | 1 |
| 5  | 0.613115 | C | 1 |
| 6  | 0.404454 | C | 1 |
| 2  | 0.696046 | E | 1 |
| 7  | 0.571445 | C | 1 |
| 1  | 0.213852 | M | 0 |
| 5  | 0.080126 | C | 1 |
| 1  | 0.286892 | C | 1 |
| 2  | 0.257214 | C | 1 |
| 7  | 0.325331 | C | 1 |
| 14 | 0.608106 | C | 1 |
| 11 | 0.518546 | F | 0 |
| 2  | 0.088839 | C | 1 |
| 6  | 0.473772 | M | 0 |
| 10 | 0.692531 | C | 1 |
| 2  | 0.696046 | E | 1 |
| 1  | 0.51501  | C | 1 |
| 8  | 0.626603 | C | 1 |
| 6  | 0.658413 | C | 1 |
| 8  | 0.342155 | G | 0 |
| 1  | 0.131548 | C | 1 |
| 3  | 0.221024 | C | 1 |
| 2  | 0.428197 | C | 1 |
| 20 | 0.365988 | C | 1 |
| 9  | 0.486502 | C | 1 |
| 7  | 0.512936 | C | 1 |
| 8  | 0.342155 | G | 0 |



|    |          |   |   |
|----|----------|---|---|
| 8  | 0.342155 | G | 0 |
| 14 | 0.608106 | C | 1 |
| 7  | 0.571445 | C | 1 |
| 2  | 0.372811 | C | 1 |
| 7  | 0.512936 | C | 1 |
| 6  | 0.658413 | C | 1 |
| 20 | 0.365988 | C | 1 |
| 7  | 0.461449 | C | 1 |
| 23 | 0.49669  | S | 0 |
| 5  | 0.220593 | I | 0 |
| 5  | 0.239195 | C | 1 |
| 6  | 0.473772 | M | 0 |
| 6  | 0.860102 | M | 0 |
| 1  | 0.131548 | C | 1 |
| 7  | 0.571445 | C | 1 |
| 6  | 0.860102 | M | 0 |
| 8  | 0.626603 | C | 1 |
| 7  | 0.461836 | C | 1 |
| 11 | 0.179011 | C | 1 |
| 20 | 0.377156 | C | 1 |
| 7  | 0.461449 | C | 1 |
| 8  | 0.342155 | G | 0 |
| 6  | 0.276898 | C | 1 |
| 23 | 0.49669  | S | 0 |
| 7  | 0.461836 | C | 1 |
| 7  | 0.647614 | C | 1 |
| 11 | 0.583097 | E | 1 |
| 7  | 0.506906 | C | 1 |
| 7  | 0.647614 | C | 1 |
| 7  | 0.512936 | C | 1 |
| 14 | 0.608106 | C | 1 |
| 6  | 0.658413 | C | 1 |
| 11 | 0.583097 | E | 1 |
| 8  | 0.626603 | C | 1 |
| 6  | 0.560236 | C | 1 |
| 6  | 0.251469 | C | 1 |
| 8  | 0.626603 | C | 1 |
| 6  | 0.276898 | C | 1 |
| 8  | 0.626603 | C | 1 |
| 7  | 0.302163 | C | 1 |
| 7  | 0.461836 | C | 1 |
| 7  | 0.449545 | C | 1 |
| 23 | 0.49669  | S | 0 |
| 9  | 0.443052 | G | 0 |
| 6  | 0.386833 | C | 1 |
| 10 | 0.196405 | C | 1 |
| 6  | 0.860102 | M | 0 |
| 1  | 0.307608 | I | 0 |
| 11 | 0.587437 | C | 1 |
| 20 | 0.365988 | C | 1 |
| 2  | 0.088839 | C | 1 |
| 9  | 0.486502 | C | 1 |
| 14 | 0.608106 | C | 1 |
| 7  | 0.473785 | C | 1 |

|    |          |   |   |
|----|----------|---|---|
| 11 | 0.179011 | C | 1 |
| 1  | 0.131548 | C | 1 |
| 11 | 0.587437 | C | 1 |
| 7  | 0.216252 | C | 1 |
| 7  | 0.093196 | C | 1 |
| 7  | 0.473785 | C | 1 |
| 7  | 0.325331 | C | 1 |
| 2  | 0.372811 | C | 1 |
| 2  | 0.696046 | E | 1 |
| 6  | 0.404454 | C | 1 |
| 2  | 0.257214 | C | 1 |
| 11 | 0.179011 | C | 1 |
| 7  | 0.512936 | C | 1 |
| 6  | 0.404454 | C | 1 |
| 6  | 0.658413 | C | 1 |
| 3  | 0.571873 | C | 1 |
| 6  | 0.860102 | M | 0 |
| 2  | 0.088839 | C | 1 |
| 23 | 0.49669  | S | 0 |
| 6  | 0.658413 | C | 1 |
| 3  | 0.38441  | C | 1 |
| 7  | 0.325331 | C | 1 |
| 6  | 0.658413 | C | 1 |
| 14 | 0.608106 | C | 1 |
| 23 | 0.49669  | S | 0 |
| 7  | 0.512936 | C | 1 |
| 10 | 0.49702  | C | 1 |
| 7  | 0.449545 | C | 1 |
| 7  | 0.461836 | C | 1 |
| 7  | 0.461836 | C | 1 |
| 14 | 0.608106 | C | 1 |
| 14 | 0.608106 | C | 1 |
| 7  | 0.302163 | C | 1 |
| 6  | 0.473772 | M | 0 |
| 1  | 0.286892 | C | 1 |
| 2  | 0.257214 | C | 1 |
| 7  | 0.461836 | C | 1 |
| 11 | 0.518546 | F | 0 |
| 11 | 0.587437 | C | 1 |
| 7  | 0.647614 | C | 1 |
| 23 | 0.49669  | S | 0 |
| 7  | 0.302163 | C | 1 |
| 5  | 0.080126 | C | 1 |
| 11 | 0.179011 | C | 1 |
| 7  | 0.325331 | C | 1 |
| 1  | 0.286892 | C | 1 |
| 6  | 0.223005 | C | 1 |
| 5  | 0.239195 | C | 1 |
| 7  | 0.512936 | C | 1 |
| 7  | 0.216252 | C | 1 |
| 1  | 0.131548 | C | 1 |
| 6  | 0.658413 | C | 1 |
| 5  | 0.239195 | C | 1 |
| 21 | 0.640463 | K | 1 |

|    |          |   |   |
|----|----------|---|---|
| 6  | 0.658413 | C | 1 |
| 6  | 0.581548 | C | 1 |
| 3  | 0.571873 | C | 1 |
| 21 | 0.640463 | K | 1 |
| 7  | 0.461449 | C | 1 |
| 5  | 0.239195 | C | 1 |
| 5  | 0.220593 | I | 0 |
| 2  | 0.696046 | E | 1 |
| 7  | 0.647614 | C | 1 |
| 11 | 0.179011 | C | 1 |
| 21 | 0.640463 | K | 1 |
| 2  | 0.257214 | C | 1 |
| 23 | 0.49669  | S | 0 |
| 6  | 0.860102 | M | 0 |
| 7  | 0.512936 | C | 1 |
| 7  | 0.461836 | C | 1 |
| 9  | 0.486502 | C | 1 |
| 7  | 0.512936 | C | 1 |
| 5  | 0.080126 | C | 1 |
| 20 | 0.365988 | C | 1 |
| 1  | 0.131548 | C | 1 |
| 11 | 0.518546 | F | 0 |
| 18 | 0.367496 | S | 0 |
| 6  | 0.33906  | C | 1 |
| 14 | 0.608106 | C | 1 |
| 3  | 0.15267  | C | 1 |
| 1  | 0.213852 | M | 0 |
| 14 | 0.608106 | C | 1 |
| 7  | 0.417886 | C | 1 |
| 6  | 0.473772 | M | 0 |
| 7  | 0.461836 | C | 1 |
| 1  | 0.200205 | C | 1 |
| 11 | 0.587437 | C | 1 |
| 8  | 0.342155 | G | 0 |
| 3  | 0.389882 | M | 0 |
| 1  | 0.213852 | M | 0 |
| 7  | 0.449545 | C | 1 |
| 7  | 0.506906 | C | 1 |
| 9  | 0.486502 | C | 1 |
| 1  | 0.213852 | M | 0 |
| 3  | 0.221024 | C | 1 |
| 1  | 0.072387 | C | 1 |
| 23 | 0.49669  | S | 0 |
| 8  | 0.70903  | C | 1 |
| 2  | 0.257214 | C | 1 |
| 10 | 0.196405 | C | 1 |
| 6  | 0.276898 | C | 1 |
| 8  | 0.342155 | G | 0 |
| 3  | 0.38441  | C | 1 |
| 7  | 0.647614 | C | 1 |
| 11 | 0.518546 | F | 0 |
| 7  | 0.647614 | C | 1 |
| 6  | 0.386833 | C | 1 |
| 6  | 0.33906  | C | 1 |

|    |          |   |   |
|----|----------|---|---|
| 7  | 0.571445 | C | 1 |
| 6  | 0.223005 | C | 1 |
| 20 | 0.377156 | C | 1 |
| 10 | 0.201666 | L | 0 |
| 6  | 0.33906  | C | 1 |
| 5  | 0.220593 | I | 0 |
| 1  | 0.200205 | C | 1 |
| 2  | 0.372811 | C | 1 |
| 6  | 0.658413 | C | 1 |
| 6  | 0.33906  | C | 1 |
| 2  | 0.428197 | C | 1 |
| 1  | 0.286892 | C | 1 |
| 2  | 0.428197 | C | 1 |
| 3  | 0.389882 | M | 0 |
| 9  | 0.443052 | G | 0 |
| 11 | 0.583097 | E | 1 |
| 11 | 0.179011 | C | 1 |
| 8  | 0.70903  | C | 1 |
| 8  | 0.70903  | C | 1 |
| 23 | 0.49669  | S | 0 |
| 8  | 0.626603 | C | 1 |
| 6  | 0.33906  | C | 1 |
| 7  | 0.449545 | C | 1 |
| 9  | 0.486502 | C | 1 |
| 14 | 0.608106 | C | 1 |
| 6  | 0.498347 | C | 1 |
| 20 | 0.365988 | C | 1 |
| 8  | 0.70903  | C | 1 |
| 3  | 0.389882 | M | 0 |
| 7  | 0.325331 | C | 1 |
| 7  | 0.512936 | C | 1 |
| 6  | 0.581548 | C | 1 |
| 20 | 0.365988 | C | 1 |
| 1  | 0.346529 | C | 1 |
| 1  | 0.51501  | C | 1 |
| 7  | 0.216252 | C | 1 |
| 7  | 0.473785 | C | 1 |
| 7  | 0.916414 | C | 1 |
| 6  | 0.560236 | C | 1 |
| 10 | 0.49702  | C | 1 |
| 6  | 0.386833 | C | 1 |
| 6  | 0.386833 | C | 1 |
| 7  | 0.449545 | C | 1 |
| 10 | 0.49702  | C | 1 |
| 6  | 0.386833 | C | 1 |
| 5  | 0.227079 | C | 1 |
| 5  | 0.227079 | C | 1 |
| 6  | 0.404454 | C | 1 |
| 7  | 0.461836 | C | 1 |
| 5  | 0.227079 | C | 1 |
| 14 | 0.608106 | C | 1 |
| 11 | 0.518546 | F | 0 |
| 3  | 0.571873 | C | 1 |
| 18 | 0.367496 | S | 0 |

|    |          |   |   |
|----|----------|---|---|
| 11 | 0.518546 | F | 0 |
| 6  | 0.560236 | C | 1 |
| 23 | 0.49669  | S | 0 |
| 1  | 0.200205 | C | 1 |
| 7  | 0.647614 | C | 1 |
| 20 | 0.377156 | C | 1 |
| 7  | 0.4089   | C | 1 |
| 5  | 0.227079 | C | 1 |
| 3  | 0.38441  | C | 1 |
| 20 | 0.365988 | C | 1 |
| 11 | 0.583097 | E | 1 |
| 21 | 0.640463 | K | 1 |
| 1  | 0.131548 | C | 1 |
| 5  | 0.080126 | C | 1 |
| 5  | 0.080126 | C | 1 |
| 23 | 0.49669  | S | 0 |
| 8  | 0.342155 | G | 0 |
| 5  | 0.220593 | I | 0 |
| 7  | 0.473785 | C | 1 |
| 8  | 0.342155 | G | 0 |
| 6  | 0.658413 | C | 1 |
| 7  | 0.506906 | C | 1 |
| 5  | 0.080126 | C | 1 |
| 9  | 0.486502 | C | 1 |
| 5  | 0.613115 | C | 1 |
| 2  | 0.428197 | C | 1 |
| 5  | 0.239195 | C | 1 |
| 7  | 0.325331 | C | 1 |
| 7  | 0.512936 | C | 1 |
| 5  | 0.239195 | C | 1 |
| 21 | 0.640463 | K | 1 |
| 6  | 0.560236 | C | 1 |
| 6  | 0.223005 | C | 1 |
| 8  | 0.70903  | C | 1 |
| 6  | 0.860102 | M | 0 |
| 7  | 0.4089   | C | 1 |
| 6  | 0.251469 | C | 1 |
| 1  | 0.072387 | C | 1 |
| 7  | 0.512936 | C | 1 |
| 20 | 0.377156 | C | 1 |
| 3  | 0.179886 | C | 1 |
| 8  | 0.342155 | G | 0 |
| 1  | 0.200205 | C | 1 |
| 10 | 0.49702  | C | 1 |
| 23 | 0.49669  | S | 0 |
| 6  | 0.658413 | C | 1 |
| 1  | 0.072387 | C | 1 |
| 7  | 0.417886 | C | 1 |
| 20 | 0.377156 | C | 1 |
| 7  | 0.916414 | C | 1 |
| 18 | 0.367496 | S | 0 |
| 10 | 0.196405 | C | 1 |
| 6  | 0.560236 | C | 1 |
| 14 | 0.608106 | C | 1 |

|    |          |   |   |
|----|----------|---|---|
| 2  | 0.428197 | C | 1 |
| 7  | 0.302163 | C | 1 |
| 6  | 0.276898 | C | 1 |
| 6  | 0.560236 | C | 1 |
| 5  | 0.613115 | C | 1 |
| 7  | 0.302163 | C | 1 |
| 1  | 0.072387 | C | 1 |
| 6  | 0.251469 | C | 1 |
| 7  | 0.417886 | C | 1 |
| 7  | 0.512936 | C | 1 |
| 10 | 0.49702  | C | 1 |
| 3  | 0.38441  | C | 1 |
| 7  | 0.461449 | C | 1 |
| 20 | 0.365988 | C | 1 |
| 21 | 0.640463 | K | 1 |
| 3  | 0.179886 | C | 1 |
| 6  | 0.276898 | C | 1 |
| 3  | 0.221024 | C | 1 |
| 2  | 0.428197 | C | 1 |
| 7  | 0.571445 | C | 1 |
| 18 | 0.367496 | S | 0 |
| 7  | 0.647614 | C | 1 |
| 8  | 0.342155 | G | 0 |
| 3  | 0.179886 | C | 1 |
| 7  | 0.461449 | C | 1 |
| 2  | 0.343128 | C | 1 |
| 6  | 0.658413 | C | 1 |
| 3  | 0.571873 | C | 1 |
| 5  | 0.646628 | C | 1 |
| 6  | 0.133071 | C | 1 |
| 7  | 0.461836 | C | 1 |
| 6  | 0.223005 | C | 1 |
| 14 | 0.608106 | C | 1 |
| 5  | 0.613115 | C | 1 |
| 11 | 0.363175 | C | 1 |
| 5  | 0.220593 | I | 0 |
| 8  | 0.70903  | C | 1 |
| 6  | 0.386833 | C | 1 |
| 6  | 0.860102 | M | 0 |
| 6  | 0.560236 | C | 1 |
| 1  | 0.346529 | C | 1 |
| 2  | 0.088839 | C | 1 |
| 2  | 0.088839 | C | 1 |
| 2  | 0.088839 | C | 1 |
| 6  | 0.581548 | C | 1 |
| 1  | 0.213852 | M | 0 |
| 9  | 0.486502 | C | 1 |
| 6  | 0.498347 | C | 1 |
| 23 | 0.49669  | S | 0 |
| 5  | 0.220593 | I | 0 |
| 6  | 0.386833 | C | 1 |
| 9  | 0.486502 | C | 1 |
| 21 | 0.640463 | K | 1 |
| 2  | 0.343128 | C | 1 |

|    |          |   |   |
|----|----------|---|---|
| 1  | 0.286892 | C | 1 |
| 6  | 0.658413 | C | 1 |
| 10 | 0.196405 | C | 1 |
| 10 | 0.196405 | C | 1 |
| 1  | 0.286892 | C | 1 |
| 7  | 0.571445 | C | 1 |
| 6  | 0.560236 | C | 1 |
| 2  | 0.343128 | C | 1 |
| 5  | 0.220593 | I | 0 |
| 7  | 0.461836 | C | 1 |
| 11 | 0.363175 | C | 1 |
| 8  | 0.342155 | G | 0 |
| 11 | 0.587437 | C | 1 |
| 3  | 0.221024 | C | 1 |
| 11 | 0.583097 | E | 1 |
| 11 | 0.518546 | F | 0 |
| 9  | 0.486502 | C | 1 |
| 6  | 0.581548 | C | 1 |
| 3  | 0.38441  | C | 1 |
| 9  | 0.486502 | C | 1 |
| 3  | 0.389882 | M | 0 |
| 1  | 0.286892 | C | 1 |
| 6  | 0.860102 | M | 0 |
| 7  | 0.4089   | C | 1 |
| 6  | 0.251469 | C | 1 |
| 14 | 0.608106 | C | 1 |
| 5  | 0.239195 | C | 1 |
| 7  | 0.325331 | C | 1 |
| 2  | 0.428197 | C | 1 |
| 7  | 0.325331 | C | 1 |
| 9  | 0.443052 | G | 0 |
| 11 | 0.583097 | E | 1 |
| 6  | 0.223005 | C | 1 |
| 2  | 0.372811 | C | 1 |
| 6  | 0.658413 | C | 1 |
| 11 | 0.179011 | C | 1 |
| 1  | 0.131548 | C | 1 |
| 11 | 0.179011 | C | 1 |
| 6  | 0.473772 | M | 0 |
| 3  | 0.389882 | M | 0 |
| 5  | 0.220593 | I | 0 |
| 8  | 0.70903  | C | 1 |
| 7  | 0.647614 | C | 1 |
| 9  | 0.443052 | G | 0 |
| 1  | 0.286892 | C | 1 |
| 7  | 0.916414 | C | 1 |
| 7  | 0.325331 | C | 1 |
| 5  | 0.227079 | C | 1 |
| 23 | 0.49669  | S | 0 |
| 7  | 0.647614 | C | 1 |
| 5  | 0.613115 | C | 1 |
| 3  | 0.571873 | C | 1 |
| 7  | 0.325331 | C | 1 |
| 7  | 0.647614 | C | 1 |

|    |          |   |   |
|----|----------|---|---|
| 6  | 0.276898 | C | 1 |
| 18 | 0.367496 | S | 0 |
| 10 | 0.692531 | C | 1 |
| 7  | 0.4089   | C | 1 |
| 3  | 0.179886 | C | 1 |
| 20 | 0.377156 | C | 1 |
| 23 | 0.49669  | S | 0 |
| 6  | 0.251469 | C | 1 |
| 8  | 0.70903  | C | 1 |
| 7  | 0.325331 | C | 1 |
| 6  | 0.581548 | C | 1 |
| 6  | 0.223005 | C | 1 |
| 7  | 0.916414 | C | 1 |
| 3  | 0.38441  | C | 1 |
| 8  | 0.342155 | G | 0 |
| 3  | 0.389882 | M | 0 |
| 1  | 0.131548 | C | 1 |
| 6  | 0.33906  | C | 1 |
| 10 | 0.201666 | L | 0 |
| 6  | 0.251469 | C | 1 |
| 10 | 0.49702  | C | 1 |
| 23 | 0.49669  | S | 0 |
| 7  | 0.506906 | C | 1 |
| 3  | 0.179886 | C | 1 |
| 1  | 0.400572 | E | 1 |
| 6  | 0.276898 | C | 1 |
| 6  | 0.404454 | C | 1 |
| 7  | 0.512936 | C | 1 |
| 7  | 0.461836 | C | 1 |
| 1  | 0.072387 | C | 1 |
| 1  | 0.131548 | C | 1 |
| 3  | 0.15267  | C | 1 |
| 2  | 0.088839 | C | 1 |
| 7  | 0.4089   | C | 1 |
| 5  | 0.613115 | C | 1 |
| 6  | 0.860102 | M | 0 |
| 3  | 0.179886 | C | 1 |
| 1  | 0.286892 | C | 1 |
| 23 | 0.49669  | S | 0 |
| 3  | 0.389882 | M | 0 |
| 11 | 0.179011 | C | 1 |
| 9  | 0.486502 | C | 1 |
| 10 | 0.196405 | C | 1 |
| 2  | 0.696046 | E | 1 |
| 2  | 0.088839 | C | 1 |
| 11 | 0.583097 | E | 1 |
| 21 | 0.640463 | K | 1 |
| 7  | 0.506906 | C | 1 |
| 7  | 0.461449 | C | 1 |
| 7  | 0.512936 | C | 1 |
| 6  | 0.404454 | C | 1 |
| 7  | 0.302163 | C | 1 |
| 7  | 0.417886 | C | 1 |
| 1  | 0.51501  | C | 1 |



|    |          |   |   |
|----|----------|---|---|
| 11 | 0.583097 | E | 1 |
| 5  | 0.613115 | C | 1 |
| 7  | 0.512936 | C | 1 |
| 7  | 0.512936 | C | 1 |
| 10 | 0.201666 | L | 0 |
| 14 | 0.608106 | C | 1 |
| 2  | 0.428197 | C | 1 |
| 20 | 0.365988 | C | 1 |
| 14 | 0.608106 | C | 1 |
| 2  | 0.088839 | C | 1 |
| 5  | 0.646628 | C | 1 |
| 3  | 0.15267  | C | 1 |
| 2  | 0.257214 | C | 1 |
| 21 | 0.640463 | K | 1 |
| 6  | 0.560236 | C | 1 |
| 2  | 0.696046 | E | 1 |
| 6  | 0.251469 | C | 1 |
| 8  | 0.626603 | C | 1 |
| 6  | 0.658413 | C | 1 |
| 11 | 0.363175 | C | 1 |
| 6  | 0.560236 | C | 1 |
| 14 | 0.608106 | C | 1 |
| 8  | 0.70903  | C | 1 |
| 6  | 0.860102 | M | 0 |
| 7  | 0.302163 | C | 1 |
| 6  | 0.276898 | C | 1 |
| 11 | 0.587437 | C | 1 |
| 20 | 0.365988 | C | 1 |
| 7  | 0.512936 | C | 1 |
| 11 | 0.179011 | C | 1 |
| 7  | 0.506906 | C | 1 |
| 9  | 0.443052 | G | 0 |
| 10 | 0.201666 | L | 0 |
| 7  | 0.325331 | C | 1 |
| 1  | 0.307608 | I | 0 |
| 7  | 0.916414 | C | 1 |
| 21 | 0.181275 | C | 1 |
| 21 | 0.181275 | C | 1 |
| 21 | 0.181275 | C | 1 |
| 16 | 0.33932  | C | 1 |
| 21 | 0.216523 | C | 1 |
| 16 | 0.33932  | C | 1 |
| 21 | 0.216523 | C | 1 |
| 16 | 0.33932  | C | 1 |
| 21 | 0.216523 | C | 1 |
| 3  | 0.220392 | C | 1 |
| 3  | 0.220392 | C | 1 |
| 17 | 0.725066 | C | 1 |
| 24 | 0.525974 | C | 1 |
| 16 | 0.33932  | C | 1 |
| 16 | 0.33932  | C | 1 |
| 3  | 0.220392 | C | 1 |
| 21 | 0.216523 | C | 1 |
| 17 | 0.725066 | C | 1 |

|    |          |   |   |
|----|----------|---|---|
| 20 | 0.24581  | C | 1 |
| 3  | 0.220392 | C | 1 |
| 21 | 0.216523 | C | 1 |
| 21 | 0.216523 | C | 1 |
| 24 | 0.525974 | C | 1 |
| 20 | 0.24581  | C | 1 |
| 17 | 0.725066 | C | 1 |
| 17 | 0.725066 | C | 1 |
| 21 | 0.216523 | C | 1 |
| 17 | 0.725066 | C | 1 |
| 20 | 0.24581  | C | 1 |
| 21 | 0.216523 | C | 1 |
| 21 | 0.216523 | C | 1 |
| 24 | 0.525974 | C | 1 |
| 17 | 0.725066 | C | 1 |
| 17 | 0.725066 | C | 1 |
| 17 | 0.725066 | C | 1 |
| 17 | 0.725066 | C | 1 |
| 21 | 0.216523 | C | 1 |
| 17 | 0.725066 | C | 1 |
| 16 | 0.33932  | C | 1 |
| 16 | 0.33932  | C | 1 |
| 17 | 0.725066 | C | 1 |
| 16 | 0.33932  | C | 1 |
| 21 | 0.216523 | C | 1 |
| 16 | 0.33932  | C | 1 |
| 21 | 0.216523 | C | 1 |
| 17 | 0.725066 | C | 1 |
| 16 | 0.33932  | C | 1 |
| 21 | 0.216523 | C | 1 |
| 3  | 0.220392 | C | 1 |
| 21 | 0.216523 | C | 1 |
| 3  | 0.220392 | C | 1 |
| 21 | 0.809817 | G | 0 |
| 19 | 0.363028 | C | 1 |
| 2  | 0.307076 | C | 1 |
| 21 | 0.809817 | G | 0 |
| 2  | 0.307076 | C | 1 |
| 18 | 0.332607 | C | 1 |
| 19 | 0.363028 | C | 1 |
| 21 | 0.809817 | G | 0 |
| 19 | 0.363028 | C | 1 |
| 2  | 0.307076 | C | 1 |
| 2  | 0.307076 | C | 1 |
| 2  | 0.307076 | C | 1 |
| 21 | 0.809817 | G | 0 |
| 2  | 0.307076 | C | 1 |
| 19 | 0.363028 | C | 1 |
| 21 | 0.809817 | G | 0 |
| 18 | 0.332607 | C | 1 |
| 18 | 0.332607 | C | 1 |
| 2  | 0.307076 | C | 1 |
| 21 | 0.809817 | G | 0 |
| 2  | 0.307076 | C | 1 |

|                |   |
|----------------|---|
| 18 0. 332607 C | 1 |
| 19 0. 363028 C | 1 |
| 19 0. 363028 C | 1 |
| 21 0. 809817 G | 0 |
| 19 0. 363028 C | 1 |
| 19 0. 363028 C | 1 |
| 18 0. 332607 C | 1 |
| 19 0. 363028 C | 1 |
| 18 0. 332607 C | 1 |
| 19 0. 363028 C | 1 |
| 19 0. 363028 C | 1 |
| 2 0. 307076 C  | 1 |
| 1 0. 464357 C  | 1 |
| 9 0. 526715 C  | 1 |
| 9 0. 526715 C  | 1 |
| 9 0. 526715 C  | 1 |
| 9 0. 526715 C  | 1 |
| 9 0. 526715 C  | 1 |
| 9 0. 526715 C  | 1 |
| 9 0. 526715 C  | 1 |
| 9 0. 526715 C  | 1 |
| 9 0. 526715 C  | 1 |
| 9 0. 526715 C  | 1 |
| 9 0. 526715 C  | 1 |
| 1 0. 464357 C  | 1 |
| 9 0. 526715 C  | 1 |
| 1 0. 464357 C  | 1 |
| 9 0. 526715 C  | 1 |
| 9 0. 526715 C  | 1 |
| 9 0. 526715 C  | 1 |
| 1 0. 464357 C  | 1 |
| 1 0. 464357 C  | 1 |
| 9 0. 526715 C  | 1 |
| 9 0. 526715 C  | 1 |
| 9 0. 526715 C  | 1 |
| 20 0. 314749 C | 1 |
| 20 0. 428925 C | 1 |
| 20 0. 314749 C | 1 |
| 20 0. 428925 C | 1 |
| 20 0. 314749 C | 1 |
| 20 0. 314749 C | 1 |
| 20 0. 314749 C | 1 |
| 20 0. 314749 C | 1 |
| 20 0. 314749 C | 1 |
| 20 0. 314749 C | 1 |
| 20 0. 428925 C | 1 |
| 14 0. 860829 E | 1 |
| 13 0. 537444 C | 1 |
| 15 0. 519717 C | 1 |
| 13 0. 537444 C | 1 |
| 18 0. 670688 C | 1 |
| 13 0. 537444 C | 1 |
| 13 0. 537444 C | 1 |
| 13 0. 537444 C | 1 |
| 13 0. 537444 C | 1 |
| 13 0. 537444 C | 1 |

|    |          |   |   |
|----|----------|---|---|
| 18 | 0.670688 | C | 1 |
| 13 | 0.537444 | C | 1 |
| 13 | 0.537444 | C | 1 |
| 13 | 0.537444 | C | 1 |
| 18 | 0.670688 | C | 1 |
| 13 | 0.537444 | C | 1 |
| 13 | 0.537444 | C | 1 |
| 14 | 0.860829 | E | 1 |
| 18 | 0.670688 | C | 1 |
| 13 | 0.537444 | C | 1 |
| 15 | 0.519717 | C | 1 |
| 15 | 0.519717 | C | 1 |
| 15 | 0.519717 | C | 1 |
| 13 | 0.537444 | C | 1 |
| 14 | 0.860829 | E | 1 |
| 14 | 0.860829 | E | 1 |
| 13 | 0.537444 | C | 1 |
| 14 | 0.860829 | E | 1 |
| 15 | 0.519717 | C | 1 |
| 15 | 0.519717 | C | 1 |
| 13 | 0.537444 | C | 1 |
| 15 | 0.519717 | C | 1 |
| 14 | 0.860829 | E | 1 |
| 13 | 0.537444 | C | 1 |
| 14 | 0.860829 | E | 1 |
| 18 | 0.670688 | C | 1 |
| 14 | 0.860829 | E | 1 |
| 13 | 0.537444 | C | 1 |
| 14 | 0.860829 | E | 1 |
| 13 | 0.537444 | C | 1 |
| 13 | 0.537444 | C | 1 |
| 13 | 0.537444 | C | 1 |
| 15 | 0.519717 | C | 1 |
| 15 | 0.519717 | C | 1 |
| 13 | 0.537444 | C | 1 |
| 13 | 0.537444 | C | 1 |
| 14 | 0.860829 | E | 1 |
| 14 | 0.860829 | E | 1 |
| 18 | 0.670688 | C | 1 |
| 18 | 0.670688 | C | 1 |
| 13 | 0.537444 | C | 1 |
| 14 | 0.860829 | E | 1 |
| 15 | 0.519717 | C | 1 |
| 15 | 0.519717 | C | 1 |
| 18 | 0.670688 | C | 1 |
| 15 | 0.519717 | C | 1 |
| 14 | 0.860829 | E | 1 |
| 14 | 0.860829 | E | 1 |
| 13 | 0.537444 | C | 1 |
| 13 | 0.537444 | C | 1 |
| 14 | 0.860829 | E | 1 |
| 14 | 0.860829 | E | 1 |
| 14 | 0.860829 | E | 1 |
| 13 | 0.537444 | C | 1 |
| 13 | 0.537444 | C | 1 |
| 14 | 0.860829 | E | 1 |
| 14 | 0.860829 | E | 1 |
| 14 | 0.860829 | E | 1 |
| 13 | 0.537444 | C | 1 |

|    |          |   |   |
|----|----------|---|---|
| 13 | 0.537444 | C | 1 |
| 18 | 0.670688 | C | 1 |
| 14 | 0.860829 | E | 1 |
| 6  | 0.434875 | C | 1 |
| 19 | 0.159615 | C | 1 |
| 11 | 0.783422 | E | 1 |
| 11 | 0.783422 | E | 1 |
| 19 | 0.159615 | C | 1 |
| 11 | 0.783422 | E | 1 |
| 11 | 0.783422 | E | 1 |
| 11 | 0.783422 | E | 1 |
| 11 | 0.783422 | E | 1 |
| 11 | 0.783422 | E | 1 |
| 19 | 0.159615 | C | 1 |
| 19 | 0.159615 | C | 1 |
| 19 | 0.159615 | C | 1 |
| 6  | 0.434875 | C | 1 |
| 19 | 0.159615 | C | 1 |
| 6  | 0.434875 | C | 1 |
| 19 | 0.159615 | C | 1 |
| 11 | 0.783422 | E | 1 |
| 11 | 0.783422 | E | 1 |
| 6  | 0.434875 | C | 1 |
| 19 | 0.159615 | C | 1 |
| 11 | 0.783422 | E | 1 |
| 11 | 0.783422 | E | 1 |
| 6  | 0.434875 | C | 1 |
| 6  | 0.434875 | C | 1 |
| 6  | 0.434875 | C | 1 |
| 19 | 0.159615 | C | 1 |
| 6  | 0.434875 | C | 1 |
| 19 | 0.159615 | C | 1 |
| 11 | 0.783422 | E | 1 |
| 6  | 0.434875 | C | 1 |
| 19 | 0.159615 | C | 1 |
| 19 | 0.159615 | C | 1 |
| 19 | 0.159615 | C | 1 |
| 6  | 0.434875 | C | 1 |
| 19 | 0.159615 | C | 1 |
| 21 | 0.236929 | I | 0 |
| 10 | 0.601986 | B | 1 |
| 22 | 0.68151  | C | 1 |
| 17 | 0.363478 | C | 1 |
| 17 | 0.363478 | C | 1 |
| 22 | 0.68151  | C | 1 |
| 17 | 0.363478 | C | 1 |
| 17 | 0.363478 | C | 1 |
| 17 | 0.363478 | C | 1 |

|    |          |   |   |
|----|----------|---|---|
| 21 | 0.236929 | I | 0 |
| 17 | 0.363478 | C | 1 |
| 21 | 0.236929 | I | 0 |
| 17 | 0.363478 | C | 1 |
| 17 | 0.363478 | C | 1 |
| 22 | 0.68151  | C | 1 |
| 21 | 0.077738 | B | 1 |
| 22 | 0.68151  | C | 1 |
| 21 | 0.213492 | C | 1 |
| 10 | 0.601986 | B | 1 |
| 10 | 0.601986 | B | 1 |
| 10 | 0.601986 | B | 1 |
| 22 | 0.68151  | C | 1 |
| 22 | 0.68151  | C | 1 |
| 22 | 0.68151  | C | 1 |
| 22 | 0.68151  | C | 1 |
| 10 | 0.601986 | B | 1 |
| 17 | 0.363478 | C | 1 |
| 21 | 0.236929 | I | 0 |
| 10 | 0.601986 | B | 1 |
| 10 | 0.601986 | B | 1 |
| 21 | 0.213492 | C | 1 |
| 21 | 0.077738 | B | 1 |
| 10 | 0.601986 | B | 1 |
| 21 | 0.236929 | I | 0 |
| 21 | 0.213492 | C | 1 |
| 10 | 0.601986 | B | 1 |
| 22 | 0.68151  | C | 1 |
| 22 | 0.68151  | C | 1 |
| 17 | 0.363478 | C | 1 |
| 22 | 0.68151  | C | 1 |
| 22 | 0.68151  | C | 1 |
| 10 | 0.601986 | B | 1 |
| 10 | 0.601986 | B | 1 |
| 10 | 0.601986 | B | 1 |
| 17 | 0.363478 | C | 1 |
| 22 | 0.68151  | C | 1 |
| 10 | 0.601986 | B | 1 |
| 17 | 0.363478 | C | 1 |
| 21 | 0.077738 | B | 1 |
| 22 | 0.68151  | C | 1 |
| 17 | 0.363478 | C | 1 |
| 21 | 0.213492 | C | 1 |
| 21 | 0.213492 | C | 1 |
| 22 | 0.68151  | C | 1 |
| 17 | 0.363478 | C | 1 |
| 10 | 0.601986 | B | 1 |
| 17 | 0.363478 | C | 1 |
| 14 | 0.400012 | C | 1 |
| 14 | 0.400012 | C | 1 |
| 20 | 0.469273 | C | 1 |
| 20 | 0.469273 | C | 1 |
| 7  | 0.427208 | C | 1 |
| 7  | 0.138731 | C | 1 |

|    |          |   |   |
|----|----------|---|---|
| 20 | 0.469273 | C | 1 |
| 20 | 0.469273 | C | 1 |
| 20 | 0.469273 | C | 1 |
| 7  | 0.138731 | C | 1 |
| 7  | 0.427208 | C | 1 |
| 20 | 0.469273 | C | 1 |
| 20 | 0.469273 | C | 1 |
| 20 | 0.469273 | C | 1 |
| 7  | 0.138731 | C | 1 |
| 7  | 0.138731 | C | 1 |
| 20 | 0.469273 | C | 1 |
| 7  | 0.138731 | C | 1 |
| 7  | 0.427208 | C | 1 |
| 14 | 0.400012 | C | 1 |
| 20 | 0.469273 | C | 1 |
| 20 | 0.469273 | C | 1 |
| 20 | 0.469273 | C | 1 |
| 14 | 0.400012 | C | 1 |
| 20 | 0.469273 | C | 1 |
| 20 | 0.469273 | C | 1 |
| 20 | 0.469273 | C | 1 |
| 7  | 0.427208 | C | 1 |
| 20 | 0.469273 | C | 1 |
| 14 | 0.400012 | C | 1 |
| 14 | 0.400012 | C | 1 |
| 7  | 0.427208 | C | 1 |
| 7  | 0.427208 | C | 1 |
| 7  | 0.138731 | C | 1 |
| 19 | 0.193061 | C | 1 |
| 19 | 0.193061 | C | 1 |
| 19 | 0.193061 | C | 1 |
| 19 | 0.193061 | C | 1 |
| 19 | 0.193061 | C | 1 |
| 1  | 0.501145 | I | 0 |
| 20 | 0.522398 | C | 1 |
| 5  | 0.169213 | I | 0 |
| 16 | 0.327195 | C | 1 |
| 21 | 0.656262 | C | 1 |
| 19 | 0.576465 | F | 0 |
| 21 | 0.684352 | C | 1 |
| 20 | 0.522398 | C | 1 |
| 18 | 0.46697  | C | 1 |
| 20 | 0.522398 | C | 1 |
| 21 | 0.684352 | C | 1 |
| 1  | 0.097093 | C | 1 |
| 13 | 0.355667 | C | 1 |
| 19 | 0.576465 | F | 0 |
| 1  | 0.097093 | C | 1 |
| 18 | 0.46697  | C | 1 |
| 13 | 0.355667 | C | 1 |
| 1  | 0.097093 | C | 1 |
| 1  | 0.097093 | C | 1 |
| 16 | 0.327195 | C | 1 |
| 19 | 0.576465 | F | 0 |

|    |          |   |   |
|----|----------|---|---|
| 13 | 0.692195 | C | 1 |
| 5  | 0.169213 | I | 0 |
| 16 | 0.327195 | C | 1 |
| 21 | 0.684352 | C | 1 |
| 13 | 0.348268 | C | 1 |
| 20 | 0.522398 | C | 1 |
| 21 | 0.684352 | C | 1 |
| 21 | 0.656262 | C | 1 |
| 16 | 0.327195 | C | 1 |
| 20 | 0.522398 | C | 1 |
| 20 | 0.522398 | C | 1 |
| 20 | 0.522398 | C | 1 |
| 20 | 0.522398 | C | 1 |
| 20 | 0.522398 | C | 1 |
| 13 | 0.348268 | C | 1 |
| 17 | 0.329257 | C | 1 |
| 13 | 0.355667 | C | 1 |
| 5  | 0.169213 | I | 0 |
| 18 | 0.46697  | C | 1 |
| 20 | 0.522398 | C | 1 |
| 5  | 0.169213 | I | 0 |
| 16 | 0.327195 | C | 1 |
| 19 | 0.576465 | F | 0 |
| 16 | 0.327195 | C | 1 |
| 18 | 0.46697  | C | 1 |
| 21 | 0.684352 | C | 1 |
| 13 | 0.355667 | C | 1 |
| 13 | 0.355667 | C | 1 |
| 13 | 0.348268 | C | 1 |
| 20 | 0.522398 | C | 1 |
| 20 | 0.522398 | C | 1 |
| 13 | 0.355667 | C | 1 |
| 13 | 0.692195 | C | 1 |
| 1  | 0.097093 | C | 1 |
| 17 | 0.329257 | C | 1 |
| 13 | 0.355667 | C | 1 |
| 16 | 0.327195 | C | 1 |
| 16 | 0.327195 | C | 1 |
| 13 | 0.355667 | C | 1 |
| 13 | 0.355667 | C | 1 |
| 1  | 0.501145 | I | 0 |
| 21 | 0.684352 | C | 1 |
| 13 | 0.355667 | C | 1 |
| 17 | 0.329257 | C | 1 |
| 21 | 0.684352 | C | 1 |
| 16 | 0.327195 | C | 1 |
| 21 | 0.684352 | C | 1 |
| 21 | 0.684352 | C | 1 |
| 17 | 0.329257 | C | 1 |
| 21 | 0.684352 | C | 1 |
| 21 | 0.656262 | C | 1 |
| 20 | 0.522398 | C | 1 |
| 17 | 0.329257 | C | 1 |
| 21 | 0.684352 | C | 1 |



|    |          |   |   |
|----|----------|---|---|
| 13 | 0.355667 | C | 1 |
| 16 | 0.327195 | C | 1 |
| 5  | 0.169213 | I | 0 |
| 21 | 0.684352 | C | 1 |
| 20 | 0.522398 | C | 1 |
| 20 | 0.522398 | C | 1 |
| 18 | 0.46697  | C | 1 |
| 19 | 0.576465 | F | 0 |
| 19 | 0.576465 | F | 0 |
| 13 | 0.355667 | C | 1 |
| 17 | 0.329257 | C | 1 |
| 21 | 0.684352 | C | 1 |
| 13 | 0.692195 | C | 1 |
| 13 | 0.348268 | C | 1 |
| 5  | 0.169213 | I | 0 |
| 13 | 0.692195 | C | 1 |
| 16 | 0.327195 | C | 1 |
| 16 | 0.327195 | C | 1 |
| 21 | 0.656262 | C | 1 |
| 1  | 0.501145 | I | 0 |
| 21 | 0.684352 | C | 1 |
| 20 | 0.522398 | C | 1 |
| 16 | 0.327195 | C | 1 |
| 21 | 0.684352 | C | 1 |
| 19 | 0.576465 | F | 0 |
| 16 | 0.327195 | C | 1 |
| 5  | 0.169213 | I | 0 |
| 16 | 0.327195 | C | 1 |
| 18 | 0.46697  | C | 1 |
| 16 | 0.327195 | C | 1 |
| 20 | 0.522398 | C | 1 |
| 16 | 0.327195 | C | 1 |
| 19 | 0.576465 | F | 0 |
| 1  | 0.097093 | C | 1 |
| 21 | 0.684352 | C | 1 |
| 5  | 0.169213 | I | 0 |
| 13 | 0.692195 | C | 1 |
| 13 | 0.348268 | C | 1 |
| 18 | 0.46697  | C | 1 |
| 13 | 0.692195 | C | 1 |
| 21 | 0.656262 | C | 1 |
| 13 | 0.348268 | C | 1 |
| 13 | 0.692195 | C | 1 |
| 1  | 0.1657   | C | 1 |
| 1  | 0.1657   | C | 1 |
| 1  | 0.1657   | C | 1 |
| 1  | 0.1657   | C | 1 |
| 1  | 0.1657   | C | 1 |
| 13 | 0.419789 | B | 1 |
| 13 | 0.419789 | B | 1 |
| 13 | 0.419789 | B | 1 |
| 13 | 0.419789 | B | 1 |
| 13 | 0.419789 | B | 1 |
| 7  | 0.474955 | C | 1 |

|    |          |   |   |
|----|----------|---|---|
| 7  | 0.474955 | C | 1 |
| 7  | 0.474955 | C | 1 |
| 7  | 0.474955 | C | 1 |
| 7  | 0.474955 | C | 1 |
| 7  | 0.474955 | C | 1 |
| 3  | 0.480793 | C | 1 |
| 7  | 0.501193 | C | 1 |
| 7  | 0.501193 | C | 1 |
| 3  | 0.480793 | C | 1 |
| 7  | 0.501193 | C | 1 |
| 7  | 0.501193 | C | 1 |
| 7  | 0.501193 | C | 1 |
| 7  | 0.501193 | C | 1 |
| 7  | 0.501193 | C | 1 |
| 3  | 0.480793 | C | 1 |
| 7  | 0.501193 | C | 1 |
| 7  | 0.501193 | C | 1 |
| 7  | 0.501193 | C | 1 |
| 3  | 0.480793 | C | 1 |
| 7  | 0.501193 | C | 1 |
| 3  | 0.480793 | C | 1 |
| 7  | 0.501193 | C | 1 |
| 3  | 0.480793 | C | 1 |
| 7  | 0.501193 | C | 1 |
| 3  | 0.480793 | C | 1 |
| 1  | 0.238342 | C | 1 |
| 1  | 0.238342 | C | 1 |
| 1  | 0.238342 | C | 1 |
| 1  | 0.238342 | C | 1 |
| 1  | 0.238342 | C | 1 |
| 15 | 0.332865 | C | 1 |
| 15 | 0.332865 | C | 1 |
| 2  | 0.301607 | C | 1 |
| 15 | 0.332865 | C | 1 |
| 19 | 0.068284 | C | 1 |
| 19 | 0.068284 | C | 1 |
| 15 | 0.332865 | C | 1 |
| 19 | 0.068284 | C | 1 |
| 15 | 0.332865 | C | 1 |
| 19 | 0.068284 | C | 1 |
| 19 | 0.068284 | C | 1 |
| 2  | 0.301607 | C | 1 |
| 2  | 0.301607 | C | 1 |
| 15 | 0.332865 | C | 1 |
| 15 | 0.332865 | C | 1 |
| 15 | 0.332865 | C | 1 |
| 15 | 0.332865 | C | 1 |
| 15 | 0.332865 | C | 1 |
| 15 | 0.33376  | C | 1 |
| 15 | 0.33376  | C | 1 |
| 5  | 0.400729 | C | 1 |
| 17 | 0.1162   | C | 1 |
| 15 | 0.33376  | C | 1 |
| 5  | 0.400729 | C | 1 |
| 5  | 0.400729 | C | 1 |
| 5  | 0.400729 | C | 1 |

|    |          |   |   |
|----|----------|---|---|
| 3  | 0.068284 | C | 1 |
| 5  | 0.400729 | C | 1 |
| 5  | 0.400729 | C | 1 |
| 5  | 0.400729 | C | 1 |
| 5  | 0.400729 | C | 1 |
| 5  | 0.400729 | C | 1 |
| 5  | 0.400729 | C | 1 |
| 3  | 0.068284 | C | 1 |
| 3  | 0.068284 | C | 1 |
| 17 | 0.1162   | C | 1 |
| 5  | 0.400729 | C | 1 |
| 5  | 0.400729 | C | 1 |
| 3  | 0.068284 | C | 1 |
| 3  | 0.068284 | C | 1 |
| 17 | 0.1162   | C | 1 |
| 5  | 0.400729 | C | 1 |
| 15 | 0.33376  | C | 1 |
| 15 | 0.33376  | C | 1 |
| 17 | 0.1162   | C | 1 |
| 5  | 0.400729 | C | 1 |
| 5  | 0.400729 | C | 1 |
| 17 | 0.1162   | C | 1 |
| 5  | 0.400729 | C | 1 |
| 3  | 0.068284 | C | 1 |
| 15 | 0.33376  | C | 1 |
| 3  | 0.068284 | C | 1 |
| 15 | 0.33376  | C | 1 |
| 5  | 0.400729 | C | 1 |
| 17 | 0.1162   | C | 1 |
| 17 | 0.1162   | C | 1 |
| 5  | 0.400729 | C | 1 |
| 19 | 0.635543 | C | 1 |
| 19 | 0.635543 | C | 1 |
| 20 | 0.379162 | C | 1 |
| 7  | 0.403864 | C | 1 |
| 20 | 0.379162 | C | 1 |
| 19 | 0.635543 | C | 1 |
| 7  | 0.403864 | C | 1 |
| 19 | 0.635543 | C | 1 |
| 19 | 0.635543 | C | 1 |
| 7  | 0.403864 | C | 1 |
| 20 | 0.379162 | C | 1 |
| 7  | 0.403864 | C | 1 |
| 7  | 0.403864 | C | 1 |
| 19 | 0.635543 | C | 1 |
| 7  | 0.403864 | C | 1 |
| 7  | 0.403864 | C | 1 |
| 7  | 0.403864 | C | 1 |
| 20 | 0.379162 | C | 1 |
| 7  | 0.403864 | C | 1 |
| 19 | 0.635543 | C | 1 |
| 19 | 0.635543 | C | 1 |
| 7  | 0.403864 | C | 1 |
| 20 | 0.379162 | C | 1 |

|    |          |   |   |
|----|----------|---|---|
| 20 | 0.605158 | C | 1 |
| 20 | 0.605158 | C | 1 |
| 16 | 0.286683 | C | 1 |
| 20 | 0.605158 | C | 1 |
| 20 | 0.605158 | C | 1 |
| 13 | 0.389509 | C | 1 |
| 20 | 0.605158 | C | 1 |
| 20 | 0.605158 | C | 1 |
| 16 | 0.286683 | C | 1 |
| 20 | 0.605158 | C | 1 |
| 20 | 0.605158 | C | 1 |
| 13 | 0.389509 | C | 1 |
| 20 | 0.605158 | C | 1 |
| 16 | 0.286683 | C | 1 |
| 13 | 0.389509 | C | 1 |
| 20 | 0.605158 | C | 1 |
| 6  | 0.364647 | C | 1 |
| 1  | 0.227606 | C | 1 |
| 6  | 0.15644  | C | 1 |
| 1  | 0.227606 | C | 1 |
| 10 | 0.518877 | C | 1 |
| 6  | 0.15644  | C | 1 |
| 6  | 0.361351 | C | 1 |
| 6  | 0.15644  | C | 1 |
| 2  | 0.071777 | C | 1 |
| 1  | 0.227606 | C | 1 |
| 7  | 0.631784 | E | 1 |
| 18 | 0.46291  | C | 1 |
| 6  | 0.179253 | C | 1 |
| 6  | 0.15644  | C | 1 |
| 7  | 0.39569  | C | 1 |
| 1  | 0.227606 | C | 1 |
| 20 | 0.568487 | C | 1 |
| 18 | 0.46291  | C | 1 |
| 24 | 0.175362 | D | 1 |
| 15 | 0.790532 | C | 1 |
| 20 | 0.568487 | C | 1 |
| 7  | 0.242413 | C | 1 |
| 6  | 0.322663 | I | 0 |
| 6  | 0.15644  | C | 1 |
| 8  | 0.554302 | C | 1 |
| 6  | 0.322663 | I | 0 |
| 2  | 0.071777 | C | 1 |
| 10 | 0.518877 | C | 1 |
| 7  | 0.39569  | C | 1 |
| 6  | 0.179253 | C | 1 |
| 2  | 0.071777 | C | 1 |
| 8  | 0.554302 | C | 1 |
| 6  | 0.15644  | C | 1 |
| 1  | 0.227606 | C | 1 |
| 2  | 0.071777 | C | 1 |
| 24 | 0.175362 | D | 1 |
| 6  | 0.322663 | I | 0 |
| 8  | 0.554302 | C | 1 |

|    |          |   |   |
|----|----------|---|---|
| 6  | 0.15644  | C | 1 |
| 18 | 0.46291  | C | 1 |
| 20 | 0.568487 | C | 1 |
| 15 | 0.790532 | C | 1 |
| 7  | 0.39569  | C | 1 |
| 6  | 0.364647 | C | 1 |
| 6  | 0.361351 | C | 1 |
| 10 | 0.518877 | C | 1 |
| 20 | 0.568487 | C | 1 |
| 7  | 0.631784 | E | 1 |
| 6  | 0.322663 | I | 0 |
| 8  | 0.371909 | C | 1 |
| 2  | 0.108939 | C | 1 |
| 2  | 0.108939 | C | 1 |
| 2  | 0.108939 | C | 1 |
| 8  | 0.371909 | C | 1 |
| 10 | 0.518877 | C | 1 |
| 6  | 0.15644  | C | 1 |
| 7  | 0.631784 | E | 1 |
| 2  | 0.071777 | C | 1 |
| 8  | 0.371909 | C | 1 |
| 18 | 0.46291  | C | 1 |
| 24 | 0.175362 | D | 1 |
| 6  | 0.364647 | C | 1 |
| 8  | 0.371909 | C | 1 |
| 7  | 0.39569  | C | 1 |
| 2  | 0.071777 | C | 1 |
| 7  | 0.39569  | C | 1 |
| 8  | 0.554302 | C | 1 |
| 24 | 0.175362 | D | 1 |
| 8  | 0.371909 | C | 1 |
| 8  | 0.554302 | C | 1 |
| 8  | 0.554302 | C | 1 |
| 8  | 0.554302 | C | 1 |
| 18 | 0.46291  | C | 1 |
| 8  | 0.554302 | C | 1 |
| 8  | 0.554302 | C | 1 |
| 7  | 0.631784 | E | 1 |
| 8  | 0.554302 | C | 1 |
| 18 | 0.46291  | C | 1 |
| 20 | 0.568487 | C | 1 |
| 15 | 0.790532 | C | 1 |
| 7  | 0.631784 | E | 1 |
| 6  | 0.364647 | C | 1 |
| 8  | 0.554302 | C | 1 |
| 8  | 0.554302 | C | 1 |
| 8  | 0.554302 | C | 1 |
| 20 | 0.568487 | C | 1 |
| 9  | 0.54072  | C | 1 |
| 9  | 0.54072  | C | 1 |
| 6  | 0.15644  | C | 1 |
| 8  | 0.554302 | C | 1 |
| 7  | 0.39569  | C | 1 |
| 10 | 0.518877 | C | 1 |

|    |          |   |   |
|----|----------|---|---|
| 7  | 0.39569  | C | 1 |
| 7  | 0.631784 | E | 1 |
| 20 | 0.568487 | C | 1 |
| 18 | 0.46291  | C | 1 |
| 6  | 0.361351 | C | 1 |
| 15 | 0.790532 | C | 1 |
| 2  | 0.108939 | C | 1 |
| 7  | 0.631784 | E | 1 |
| 6  | 0.322663 | I | 0 |
| 24 | 0.175362 | D | 1 |
| 15 | 0.790532 | C | 1 |
| 7  | 0.39569  | C | 1 |
| 2  | 0.108939 | C | 1 |
| 6  | 0.15644  | C | 1 |
| 7  | 0.631784 | E | 1 |
| 6  | 0.364647 | C | 1 |
| 7  | 0.242413 | C | 1 |
| 6  | 0.364647 | C | 1 |
| 15 | 0.790532 | C | 1 |
| 6  | 0.15644  | C | 1 |
| 6  | 0.361351 | C | 1 |
| 7  | 0.39569  | C | 1 |
| 8  | 0.554302 | C | 1 |
| 8  | 0.371909 | C | 1 |
| 6  | 0.179253 | C | 1 |
| 8  | 0.371909 | C | 1 |
| 18 | 0.46291  | C | 1 |
| 8  | 0.371909 | C | 1 |
| 1  | 0.227606 | C | 1 |
| 7  | 0.242413 | C | 1 |
| 6  | 0.15644  | C | 1 |
| 6  | 0.322663 | I | 0 |
| 7  | 0.39569  | C | 1 |
| 7  | 0.39569  | C | 1 |
| 15 | 0.790532 | C | 1 |
| 6  | 0.322663 | I | 0 |
| 15 | 0.790532 | C | 1 |
| 8  | 0.371909 | C | 1 |
| 7  | 0.39569  | C | 1 |
| 7  | 0.39569  | C | 1 |
| 7  | 0.631784 | E | 1 |
| 7  | 0.39569  | C | 1 |
| 8  | 0.371909 | C | 1 |
| 7  | 0.39569  | C | 1 |
| 7  | 0.39569  | C | 1 |
| 6  | 0.15644  | C | 1 |
| 8  | 0.371909 | C | 1 |
| 10 | 0.518877 | C | 1 |
| 9  | 0.54072  | C | 1 |
| 6  | 0.179253 | C | 1 |
| 15 | 0.790532 | C | 1 |
| 2  | 0.071777 | C | 1 |
| 6  | 0.179253 | C | 1 |
| 2  | 0.071777 | C | 1 |

|    |          |   |   |
|----|----------|---|---|
| 2  | 0.071777 | C | 1 |
| 10 | 0.518877 | C | 1 |
| 9  | 0.54072  | C | 1 |
| 7  | 0.39569  | C | 1 |
| 6  | 0.361351 | C | 1 |
| 8  | 0.554302 | C | 1 |
| 8  | 0.554302 | C | 1 |
| 6  | 0.15644  | C | 1 |
| 7  | 0.631784 | E | 1 |
| 9  | 0.54072  | C | 1 |
| 8  | 0.554302 | C | 1 |
| 7  | 0.39569  | C | 1 |
| 3  | 0.604593 | C | 1 |
| 3  | 0.604593 | C | 1 |
| 3  | 0.604593 | C | 1 |
| 20 | 0.522167 | C | 1 |
| 20 | 0.522167 | C | 1 |
| 16 | 0.699793 | C | 1 |
| 20 | 0.522167 | C | 1 |
| 20 | 0.522167 | C | 1 |
| 16 | 0.699793 | C | 1 |
| 20 | 0.522167 | C | 1 |
| 16 | 0.699793 | C | 1 |
| 16 | 0.699793 | C | 1 |
| 20 | 0.522167 | C | 1 |
| 20 | 0.522167 | C | 1 |
| 16 | 0.699793 | C | 1 |
| 20 | 0.522167 | C | 1 |
| 16 | 0.699793 | C | 1 |
| 16 | 0.699793 | C | 1 |
| 16 | 0.699793 | C | 1 |
| 20 | 0.741981 | C | 1 |
| 5  | 0.55956  | C | 1 |
| 5  | 0.55956  | C | 1 |
| 5  | 0.55956  | C | 1 |
| 5  | 0.55956  | C | 1 |
| 5  | 0.55956  | C | 1 |
| 5  | 0.55956  | C | 1 |
| 5  | 0.55956  | C | 1 |
| 5  | 0.55956  | C | 1 |
| 20 | 0.741981 | C | 1 |
| 5  | 0.55956  | C | 1 |
| 5  | 0.55956  | C | 1 |
| 20 | 0.741981 | C | 1 |
| 11 | 0.302646 | C | 1 |
| 2  | 0.248791 | C | 1 |
| 6  | 0.162067 | I | 0 |
| 6  | 0.195964 | C | 1 |
| 13 | 0.379669 | C | 1 |
| 6  | 0.510383 | C | 1 |
| 8  | 0.476434 | R | 0 |
| 6  | 0.188886 | C | 1 |
| 6  | 0.188886 | C | 1 |
| 6  | 0.174507 | C | 1 |
| 5  | 0.292436 | C | 1 |

|    |          |   |   |
|----|----------|---|---|
| 6  | 0.188886 | C | 1 |
| 6  | 0.399814 | C | 1 |
| 6  | 0.399814 | C | 1 |
| 6  | 0.174507 | C | 1 |
| 6  | 0.174507 | C | 1 |
| 13 | 0.379669 | C | 1 |
| 8  | 0.476434 | R | 0 |
| 13 | 0.379669 | C | 1 |
| 6  | 0.195964 | C | 1 |
| 6  | 0.188886 | C | 1 |
| 10 | 0.210609 | C | 1 |
| 6  | 0.399814 | C | 1 |
| 7  | 0.323177 | C | 1 |
| 11 | 0.302646 | C | 1 |
| 7  | 0.323177 | C | 1 |
| 13 | 0.379669 | C | 1 |
| 24 | 0.323646 | C | 1 |
| 6  | 0.162067 | I | 0 |
| 2  | 0.248791 | C | 1 |
| 6  | 0.399814 | C | 1 |
| 6  | 0.195964 | C | 1 |
| 24 | 0.323646 | C | 1 |
| 17 | 0.491504 | C | 1 |
| 6  | 0.188886 | C | 1 |
| 17 | 0.491504 | C | 1 |
| 6  | 0.510383 | C | 1 |
| 5  | 0.292436 | C | 1 |
| 13 | 0.379669 | C | 1 |
| 20 | 0.464079 | C | 1 |
| 13 | 0.379669 | C | 1 |
| 20 | 0.464079 | C | 1 |
| 17 | 0.491504 | C | 1 |
| 8  | 0.476434 | R | 0 |
| 13 | 0.379669 | C | 1 |
| 6  | 0.188886 | C | 1 |
| 10 | 0.210609 | C | 1 |
| 20 | 0.464079 | C | 1 |
| 6  | 0.162067 | I | 0 |
| 6  | 0.174507 | C | 1 |
| 10 | 0.210609 | C | 1 |
| 6  | 0.188886 | C | 1 |
| 13 | 0.379669 | C | 1 |
| 6  | 0.510383 | C | 1 |
| 11 | 0.302646 | C | 1 |
| 13 | 0.379669 | C | 1 |
| 6  | 0.195964 | C | 1 |
| 6  | 0.188886 | C | 1 |
| 6  | 0.188886 | C | 1 |
| 5  | 0.292436 | C | 1 |
| 10 | 0.210609 | C | 1 |
| 20 | 0.464079 | C | 1 |
| 13 | 0.379669 | C | 1 |
| 20 | 0.464079 | C | 1 |
| 13 | 0.379669 | C | 1 |



|    |          |   |   |
|----|----------|---|---|
| 5  | 0.292436 | C | 1 |
| 24 | 0.323646 | C | 1 |
| 17 | 0.491504 | C | 1 |
| 8  | 0.476434 | R | 0 |
| 13 | 0.379669 | C | 1 |
| 20 | 0.464079 | C | 1 |
| 24 | 0.323646 | C | 1 |
| 20 | 0.464079 | C | 1 |
| 20 | 0.464079 | C | 1 |
| 11 | 0.302646 | C | 1 |
| 11 | 0.302646 | C | 1 |
| 6  | 0.510383 | C | 1 |
| 2  | 0.248791 | C | 1 |
| 24 | 0.323646 | C | 1 |
| 6  | 0.162067 | I | 0 |
| 13 | 0.379669 | C | 1 |
| 20 | 0.464079 | C | 1 |
| 24 | 0.323646 | C | 1 |
| 13 | 0.379669 | C | 1 |
| 13 | 0.379669 | C | 1 |
| 13 | 0.379669 | C | 1 |
| 5  | 0.292436 | C | 1 |
| 20 | 0.464079 | C | 1 |
| 20 | 0.464079 | C | 1 |
| 20 | 0.464079 | C | 1 |
| 10 | 0.210609 | C | 1 |
| 13 | 0.379669 | C | 1 |
| 7  | 0.323177 | C | 1 |
| 24 | 0.323646 | C | 1 |
| 6  | 0.195964 | C | 1 |
| 6  | 0.188886 | C | 1 |
| 6  | 0.510383 | C | 1 |
| 7  | 0.323177 | C | 1 |
| 7  | 0.323177 | C | 1 |
| 17 | 0.491504 | C | 1 |
| 17 | 0.491504 | C | 1 |
| 20 | 0.464079 | C | 1 |
| 6  | 0.188886 | C | 1 |
| 6  | 0.510383 | C | 1 |
| 20 | 0.464079 | C | 1 |
| 6  | 0.399814 | C | 1 |
| 24 | 0.323646 | C | 1 |
| 13 | 0.379669 | C | 1 |
| 7  | 0.323177 | C | 1 |
| 24 | 0.323646 | C | 1 |
| 20 | 0.464079 | C | 1 |
| 24 | 0.323646 | C | 1 |
| 6  | 0.510383 | C | 1 |
| 7  | 0.323177 | C | 1 |
| 13 | 0.379669 | C | 1 |
| 24 | 0.323646 | C | 1 |
| 8  | 0.476434 | R | 0 |
| 7  | 0.323177 | C | 1 |
| 8  | 0.476434 | R | 0 |

|    |          |   |   |
|----|----------|---|---|
| 5  | 0.292436 | C | 1 |
| 7  | 0.323177 | C | 1 |
| 20 | 0.464079 | C | 1 |
| 5  | 0.292436 | C | 1 |
| 6  | 0.399814 | C | 1 |
| 6  | 0.174507 | C | 1 |
| 6  | 0.188886 | C | 1 |
| 13 | 0.379669 | C | 1 |
| 13 | 0.379669 | C | 1 |
| 10 | 0.210609 | C | 1 |
| 6  | 0.162067 | I | 0 |
| 7  | 0.323177 | C | 1 |
| 6  | 0.510383 | C | 1 |
| 13 | 0.646484 | C | 1 |
| 21 | 0.611346 | C | 1 |
| 21 | 0.611346 | C | 1 |
| 21 | 0.611346 | C | 1 |
| 15 | 0.406845 | C | 1 |
| 21 | 0.611346 | C | 1 |
| 21 | 0.611346 | C | 1 |
| 21 | 0.611346 | C | 1 |
| 13 | 0.646484 | C | 1 |
| 21 | 0.611346 | C | 1 |
| 17 | 0.368889 | C | 1 |
| 10 | 0.304874 | C | 1 |
| 10 | 0.304874 | C | 1 |
| 13 | 0.646484 | C | 1 |
| 21 | 0.611346 | C | 1 |
| 13 | 0.646484 | C | 1 |
| 21 | 0.611346 | C | 1 |
| 15 | 0.406845 | C | 1 |
| 13 | 0.646484 | C | 1 |
| 10 | 0.304874 | C | 1 |
| 15 | 0.406845 | C | 1 |
| 10 | 0.304874 | C | 1 |
| 15 | 0.406845 | C | 1 |
| 15 | 0.406845 | C | 1 |
| 15 | 0.406845 | C | 1 |
| 13 | 0.646484 | C | 1 |
| 21 | 0.611346 | C | 1 |
| 10 | 0.304874 | C | 1 |
| 13 | 0.646484 | C | 1 |
| 21 | 0.611346 | C | 1 |
| 13 | 0.646484 | C | 1 |
| 15 | 0.406845 | C | 1 |
| 21 | 0.611346 | C | 1 |
| 17 | 0.368889 | C | 1 |
| 21 | 0.611346 | C | 1 |
| 21 | 0.611346 | C | 1 |
| 13 | 0.646484 | C | 1 |
| 15 | 0.406845 | C | 1 |
| 17 | 0.368889 | C | 1 |
| 15 | 0.406845 | C | 1 |
| 15 | 0.406845 | C | 1 |

|    |          |   |   |
|----|----------|---|---|
| 21 | 0.611346 | C | 1 |
| 13 | 0.646484 | C | 1 |
| 15 | 0.406845 | C | 1 |
| 17 | 0.368889 | C | 1 |
| 17 | 0.368889 | C | 1 |
| 21 | 0.611346 | C | 1 |
| 17 | 0.368889 | C | 1 |
| 21 | 0.611346 | C | 1 |
| 21 | 0.590115 | C | 1 |
| 21 | 0.590115 | C | 1 |
| 21 | 0.590115 | C | 1 |
| 19 | 0.702639 | D | 1 |
| 21 | 0.590115 | C | 1 |
| 19 | 0.702639 | D | 1 |
| 19 | 0.702639 | D | 1 |
| 19 | 0.277529 | C | 1 |
| 19 | 0.702639 | D | 1 |
| 21 | 0.590115 | C | 1 |
| 19 | 0.702639 | D | 1 |
| 19 | 0.277529 | C | 1 |
| 19 | 0.702639 | D | 1 |
| 19 | 0.277529 | C | 1 |
| 19 | 0.702639 | D | 1 |
| 19 | 0.277529 | C | 1 |
| 19 | 0.702639 | D | 1 |
| 19 | 0.277529 | C | 1 |
| 19 | 0.702639 | D | 1 |
| 19 | 0.277529 | C | 1 |
| 21 | 0.590115 | C | 1 |
| 5  | 0.52558  | C | 1 |
| 5  | 0.52558  | C | 1 |
| 5  | 0.52558  | C | 1 |
| 5  | 0.52558  | C | 1 |
| 5  | 0.52558  | C | 1 |
| 16 | 0.269066 | C | 1 |
| 11 | 0.467709 | K | 1 |
| 18 | 0.42134  | C | 1 |
| 10 | 0.139858 | C | 1 |
| 9  | 0.159571 | C | 1 |
| 23 | 0.278642 | C | 1 |
| 18 | 0.42134  | C | 1 |
| 18 | 0.42134  | C | 1 |
| 9  | 0.159571 | C | 1 |
| 9  | 0.159571 | C | 1 |
| 6  | 0.302913 | C | 1 |
| 9  | 0.159571 | C | 1 |
| 9  | 0.159571 | C | 1 |
| 18 | 0.42134  | C | 1 |
| 10 | 0.139858 | C | 1 |
| 9  | 0.159571 | C | 1 |
| 1  | 0.59131  | E | 1 |
| 23 | 0.278642 | C | 1 |
| 23 | 0.278642 | C | 1 |
| 11 | 0.467709 | K | 1 |
| 6  | 0.302913 | C | 1 |

|    |          |   |   |
|----|----------|---|---|
| 23 | 0.278642 | C | 1 |
| 11 | 0.467709 | K | 1 |
| 16 | 0.269066 | C | 1 |
| 11 | 0.467709 | K | 1 |
| 23 | 0.278642 | C | 1 |
| 16 | 0.269066 | C | 1 |
| 18 | 0.42134  | C | 1 |
| 21 | 0.224892 | C | 1 |
| 9  | 0.159571 | C | 1 |
| 9  | 0.159571 | C | 1 |
| 9  | 0.159571 | C | 1 |
| 1  | 0.59131  | E | 1 |
| 10 | 0.139858 | C | 1 |
| 10 | 0.139858 | C | 1 |
| 9  | 0.159571 | C | 1 |
| 9  | 0.159571 | C | 1 |
| 11 | 0.467709 | K | 1 |
| 9  | 0.159571 | C | 1 |
| 1  | 0.59131  | E | 1 |
| 1  | 0.59131  | E | 1 |
| 1  | 0.59131  | E | 1 |
| 1  | 0.59131  | E | 1 |
| 6  | 0.302913 | C | 1 |
| 18 | 0.42134  | C | 1 |
| 18 | 0.42134  | C | 1 |
| 16 | 0.269066 | C | 1 |
| 6  | 0.302913 | C | 1 |
| 9  | 0.159571 | C | 1 |
| 6  | 0.302913 | C | 1 |
| 18 | 0.42134  | C | 1 |
| 9  | 0.159571 | C | 1 |
| 18 | 0.42134  | C | 1 |
| 9  | 0.159571 | C | 1 |
| 18 | 0.42134  | C | 1 |
| 16 | 0.269066 | C | 1 |
| 18 | 0.42134  | C | 1 |
| 11 | 0.467709 | K | 1 |
| 16 | 0.269066 | C | 1 |
| 21 | 0.224892 | C | 1 |
| 16 | 0.269066 | C | 1 |
| 9  | 0.159571 | C | 1 |
| 16 | 0.269066 | C | 1 |
| 21 | 0.224892 | C | 1 |
| 18 | 0.42134  | C | 1 |
| 1  | 0.59131  | E | 1 |
| 18 | 0.42134  | C | 1 |
| 1  | 0.59131  | E | 1 |
| 16 | 0.269066 | C | 1 |
| 10 | 0.139858 | C | 1 |
| 18 | 0.42134  | C | 1 |
| 18 | 0.42134  | C | 1 |
| 18 | 0.42134  | C | 1 |
| 9  | 0.159571 | C | 1 |
| 16 | 0.269066 | C | 1 |

|    |          |   |   |
|----|----------|---|---|
| 11 | 0.467709 | K | 1 |
| 18 | 0.42134  | C | 1 |
| 6  | 0.302913 | C | 1 |
| 16 | 0.269066 | C | 1 |
| 6  | 0.302913 | C | 1 |
| 11 | 0.467709 | K | 1 |
| 10 | 0.139858 | C | 1 |
| 18 | 0.42134  | C | 1 |
| 9  | 0.159571 | C | 1 |
| 10 | 0.139858 | C | 1 |
| 18 | 0.42134  | C | 1 |
| 18 | 0.42134  | C | 1 |
| 16 | 0.269066 | C | 1 |
| 1  | 0.225431 | C | 1 |
| 19 | 0.534626 | C | 1 |
| 24 | 0.389791 | C | 1 |
| 24 | 0.389791 | C | 1 |
| 7  | 0.107918 | C | 1 |
| 24 | 0.389791 | C | 1 |
| 22 | 0.671283 | C | 1 |
| 22 | 0.671283 | C | 1 |
| 19 | 0.534626 | C | 1 |
| 21 | 0.415224 | C | 1 |
| 1  | 0.225431 | C | 1 |
| 20 | 0.620305 | C | 1 |
| 22 | 0.671283 | C | 1 |
| 21 | 0.29261  | C | 1 |
| 21 | 0.29261  | C | 1 |
| 7  | 0.107918 | C | 1 |
| 20 | 0.620305 | C | 1 |
| 3  | 0.235907 | C | 1 |
| 22 | 0.671283 | C | 1 |
| 22 | 0.671283 | C | 1 |
| 21 | 0.29261  | C | 1 |
| 22 | 0.671283 | C | 1 |
| 20 | 0.620305 | C | 1 |
| 15 | 0.759198 | D | 1 |
| 21 | 0.415224 | C | 1 |
| 1  | 0.225431 | C | 1 |
| 7  | 0.107918 | C | 1 |
| 24 | 0.516107 | N | 0 |
| 15 | 0.759198 | D | 1 |
| 21 | 0.415224 | C | 1 |
| 24 | 0.389791 | C | 1 |
| 21 | 0.29261  | C | 1 |
| 20 | 0.620305 | C | 1 |
| 1  | 0.225431 | C | 1 |
| 24 | 0.389791 | C | 1 |
| 3  | 0.235907 | C | 1 |
| 24 | 0.389791 | C | 1 |
| 21 | 0.415224 | C | 1 |
| 24 | 0.389791 | C | 1 |
| 22 | 0.671283 | C | 1 |
| 7  | 0.107918 | C | 1 |

|    |          |   |   |
|----|----------|---|---|
| 1  | 0.225431 | C | 1 |
| 15 | 0.759198 | D | 1 |
| 24 | 0.516107 | N | 0 |
| 24 | 0.389791 | C | 1 |
| 21 | 0.29261  | C | 1 |
| 15 | 0.759198 | D | 1 |
| 20 | 0.620305 | C | 1 |
| 24 | 0.389791 | C | 1 |
| 3  | 0.235907 | C | 1 |
| 20 | 0.620305 | C | 1 |
| 20 | 0.620305 | C | 1 |
| 21 | 0.29261  | C | 1 |
| 21 | 0.29261  | C | 1 |
| 19 | 0.573626 | C | 1 |
| 24 | 0.389791 | C | 1 |
| 24 | 0.389791 | C | 1 |
| 7  | 0.107918 | C | 1 |
| 19 | 0.534626 | C | 1 |
| 1  | 0.225431 | C | 1 |
| 3  | 0.235907 | C | 1 |
| 24 | 0.389791 | C | 1 |
| 22 | 0.671283 | C | 1 |
| 20 | 0.620305 | C | 1 |
| 19 | 0.573626 | C | 1 |
| 24 | 0.516107 | N | 0 |
| 21 | 0.415224 | C | 1 |
| 20 | 0.620305 | C | 1 |
| 7  | 0.107918 | C | 1 |
| 21 | 0.415224 | C | 1 |
| 24 | 0.516107 | N | 0 |
| 22 | 0.671283 | C | 1 |
| 21 | 0.415224 | C | 1 |
| 1  | 0.225431 | C | 1 |
| 24 | 0.516107 | N | 0 |
| 21 | 0.415224 | C | 1 |
| 22 | 0.671283 | C | 1 |
| 21 | 0.415224 | C | 1 |
| 24 | 0.389791 | C | 1 |
| 21 | 0.415224 | C | 1 |
| 7  | 0.107918 | C | 1 |
| 20 | 0.620305 | C | 1 |
| 19 | 0.573626 | C | 1 |
| 7  | 0.107918 | C | 1 |
| 22 | 0.671283 | C | 1 |
| 21 | 0.29261  | C | 1 |
| 24 | 0.516107 | N | 0 |
| 3  | 0.235907 | C | 1 |
| 24 | 0.389791 | C | 1 |
| 24 | 0.516107 | N | 0 |
| 20 | 0.620305 | C | 1 |
| 24 | 0.389791 | C | 1 |
| 24 | 0.389791 | C | 1 |
| 7  | 0.107918 | C | 1 |
| 22 | 0.671283 | C | 1 |

|    |          |   |   |
|----|----------|---|---|
| 22 | 0.671283 | C | 1 |
| 3  | 0.235907 | C | 1 |
| 24 | 0.389791 | C | 1 |
| 19 | 0.534626 | C | 1 |
| 19 | 0.573626 | C | 1 |
| 7  | 0.107918 | C | 1 |
| 19 | 0.534626 | C | 1 |
| 21 | 0.415224 | C | 1 |
| 22 | 0.671283 | C | 1 |
| 24 | 0.389791 | C | 1 |
| 15 | 0.759198 | D | 1 |
| 22 | 0.671283 | C | 1 |
| 21 | 0.29261  | C | 1 |
| 7  | 0.107918 | C | 1 |
| 22 | 0.671283 | C | 1 |
| 14 | 0.489586 | C | 1 |
| 18 | 0.527426 | I | 0 |
| 7  | 0.291878 | R | 0 |
| 6  | 0.068284 | C | 1 |
| 2  | 0.529807 | C | 1 |
| 18 | 0.805407 | C | 1 |
| 19 | 0.370568 | C | 1 |
| 18 | 0.805407 | C | 1 |
| 6  | 0.068284 | C | 1 |
| 24 | 0.682708 | M | 0 |
| 17 | 0.540256 | C | 1 |
| 7  | 0.282247 | C | 1 |
| 1  | 0.174087 | C | 1 |
| 17 | 0.504093 | A | 0 |
| 18 | 0.527426 | I | 0 |
| 17 | 0.232193 | C | 1 |
| 8  | 0.412418 | Q | 0 |
| 5  | 0.291087 |   | 0 |
| 18 | 0.527426 | I | 0 |
| 24 | 0.682708 | M | 0 |
| 5  | 0.236107 | C | 1 |
| 2  | 0.284951 | C | 1 |
| 7  | 0.291878 | R | 0 |
| 7  | 0.363411 | C | 1 |
| 7  | 0.282247 | C | 1 |
| 21 | 0.525087 | C | 1 |
| 17 | 0.540256 | C | 1 |
| 11 | 0.6121   | C | 1 |
| 9  | 0.114822 | I | 0 |
| 21 | 0.847565 | D | 1 |
| 5  | 0.236107 | C | 1 |
| 3  | 0.244282 | C | 1 |
| 2  | 0.529807 | C | 1 |
| 17 | 0.540256 | C | 1 |
| 5  | 0.291087 |   | 0 |
| 2  | 0.457243 | C | 1 |
| 6  | 0.068284 | C | 1 |
| 17 | 0.232193 | C | 1 |
| 2  | 0.457243 | C | 1 |

|    |          |   |   |
|----|----------|---|---|
| 17 | 0.540256 | C | 1 |
| 8  | 0.299715 | C | 1 |
| 9  | 0.114822 | I | 0 |
| 7  | 0.363411 | C | 1 |
| 21 | 0.847565 | D | 1 |
| 17 | 0.540256 | C | 1 |
| 19 | 0.370568 | C | 1 |
| 7  | 0.291878 | R | 0 |
| 14 | 0.510727 | I | 0 |
| 7  | 0.517493 | C | 1 |
| 2  | 0.457243 | C | 1 |
| 8  | 0.299715 | C | 1 |
| 8  | 0.412418 | Q | 0 |
| 17 | 0.504093 | A | 0 |
| 21 | 0.847565 | D | 1 |
| 7  | 0.282247 | C | 1 |
| 11 | 0.6121   | C | 1 |
| 5  | 0.291087 |   | 0 |
| 6  | 0.068284 | C | 1 |
| 18 | 0.805407 | C | 1 |
| 2  | 0.457243 | C | 1 |
| 8  | 0.299715 | C | 1 |
| 2  | 0.457243 | C | 1 |
| 5  | 0.291087 |   | 0 |
| 8  | 0.412418 | Q | 0 |
| 5  | 0.236107 | C | 1 |
| 6  | 0.068284 | C | 1 |
| 3  | 0.413795 | C | 1 |
| 17 | 0.540256 | C | 1 |
| 18 | 0.805407 | C | 1 |
| 6  | 0.471144 | N | 0 |
| 11 | 0.6121   | C | 1 |
| 14 | 0.489586 | C | 1 |
| 6  | 0.471144 | N | 0 |
| 14 | 0.489586 | C | 1 |
| 21 | 0.847565 | D | 1 |
| 19 | 0.370568 | C | 1 |
| 11 | 0.6121   | C | 1 |
| 5  | 0.164293 | C | 1 |
| 18 | 0.614974 | G | 0 |
| 2  | 0.284951 | C | 1 |
| 5  | 0.164293 | C | 1 |
| 18 | 0.805407 | C | 1 |
| 3  | 0.413795 | C | 1 |
| 6  | 0.068284 | C | 1 |
| 7  | 0.517493 | C | 1 |
| 18 | 0.614974 | G | 0 |
| 21 | 0.847565 | D | 1 |
| 11 | 0.6121   | C | 1 |
| 7  | 0.282247 | C | 1 |
| 21 | 0.847565 | D | 1 |
| 17 | 0.504093 | A | 0 |
| 18 | 0.805407 | C | 1 |
| 7  | 0.363411 | C | 1 |



|    |          |   |   |
|----|----------|---|---|
| 5  | 0.164293 | C | 1 |
| 3  | 0.244282 | C | 1 |
| 11 | 0.6121   | C | 1 |
| 13 | 0.285833 | A | 0 |
| 9  | 0.114822 | I | 0 |
| 7  | 0.517493 | C | 1 |
| 2  | 0.529807 | C | 1 |
| 1  | 0.174087 | C | 1 |
| 9  | 0.114822 | I | 0 |
| 7  | 0.517493 | C | 1 |
| 7  | 0.517493 | C | 1 |
| 5  | 0.236107 | C | 1 |
| 7  | 0.517493 | C | 1 |
| 1  | 0.174087 | C | 1 |
| 7  | 0.517493 | C | 1 |
| 7  | 0.517493 | C | 1 |
| 19 | 0.370568 | C | 1 |
| 18 | 0.527426 | I | 0 |
| 24 | 0.682708 | M | 0 |
| 7  | 0.517493 | C | 1 |
| 7  | 0.517493 | C | 1 |
| 2  | 0.284951 | C | 1 |
| 8  | 0.412418 | Q | 0 |
| 14 | 0.489586 | C | 1 |
| 2  | 0.529807 | C | 1 |
| 14 | 0.489586 | C | 1 |
| 14 | 0.489586 | C | 1 |
| 8  | 0.412418 | Q | 0 |
| 13 | 0.285833 | A | 0 |
| 2  | 0.284951 | C | 1 |
| 6  | 0.068284 | C | 1 |
| 8  | 0.299715 | C | 1 |
| 17 | 0.504093 | A | 0 |
| 3  | 0.413795 | C | 1 |
| 21 | 0.525087 | C | 1 |
| 6  | 0.068284 | C | 1 |
| 9  | 0.114822 | I | 0 |
| 5  | 0.236107 | C | 1 |
| 1  | 0.174087 | C | 1 |
| 7  | 0.282247 | C | 1 |
| 17 | 0.540256 | C | 1 |
| 21 | 0.525087 | C | 1 |
| 11 | 0.6121   | C | 1 |
| 18 | 0.527426 | I | 0 |
| 6  | 0.471144 | N | 0 |
| 14 | 0.489586 | C | 1 |
| 5  | 0.284171 | C | 1 |
| 11 | 0.6121   | C | 1 |
| 7  | 0.517493 | C | 1 |
| 9  | 0.114822 | I | 0 |
| 21 | 0.847565 | D | 1 |
| 17 | 0.504093 | A | 0 |
| 17 | 0.232193 | C | 1 |
| 6  | 0.471144 | N | 0 |

|    |          |   |   |
|----|----------|---|---|
| 6  | 0.068284 | C | 1 |
| 18 | 0.805407 | C | 1 |
| 21 | 0.525087 | C | 1 |
| 17 | 0.504093 | A | 0 |
| 7  | 0.291878 | R | 0 |
| 13 | 0.285833 | A | 0 |
| 17 | 0.232193 | C | 1 |
| 2  | 0.529807 | C | 1 |
| 18 | 0.527426 | I | 0 |
| 11 | 0.6121   | C | 1 |
| 14 | 0.489586 | C | 1 |
| 14 | 0.489586 | C | 1 |
| 5  | 0.164293 | C | 1 |
| 3  | 0.413795 | C | 1 |
| 21 | 0.847565 | D | 1 |
| 3  | 0.413795 | C | 1 |
| 21 | 0.525087 | C | 1 |
| 21 | 0.525087 | C | 1 |
| 3  | 0.244282 | C | 1 |
| 17 | 0.540256 | C | 1 |
| 14 | 0.489586 | C | 1 |
| 2  | 0.529807 | C | 1 |
| 2  | 0.529807 | C | 1 |
| 21 | 0.847565 | D | 1 |
| 21 | 0.525087 | C | 1 |
| 2  | 0.284951 | C | 1 |
| 7  | 0.363411 | C | 1 |
| 21 | 0.525087 | C | 1 |
| 7  | 0.517493 | C | 1 |
| 2  | 0.457243 | C | 1 |
| 18 | 0.805407 | C | 1 |
| 13 | 0.285833 | A | 0 |
| 2  | 0.457243 | C | 1 |
| 9  | 0.114822 | I | 0 |
| 13 | 0.285833 | A | 0 |
| 14 | 0.489586 | C | 1 |
| 17 | 0.540256 | C | 1 |
| 5  | 0.284171 | C | 1 |
| 5  | 0.284171 | C | 1 |
| 7  | 0.282247 | C | 1 |
| 5  | 0.291087 |   | 0 |
| 17 | 0.504093 | A | 0 |
| 7  | 0.291878 | R | 0 |
| 17 | 0.540256 | C | 1 |
| 8  | 0.299715 | C | 1 |
| 14 | 0.489586 | C | 1 |
| 7  | 0.363411 | C | 1 |
| 5  | 0.284171 | C | 1 |
| 18 | 0.614974 | G | 0 |
| 17 | 0.232193 | C | 1 |
| 24 | 0.682708 | M | 0 |
| 6  | 0.471144 | N | 0 |
| 14 | 0.510727 | I | 0 |
| 17 | 0.540256 | C | 1 |

|               |   |
|---------------|---|
| 8 0.299715 C  | 1 |
| 6 0.471144 N  | 0 |
| 21 0.847565 D | 1 |
| 17 0.232193 C | 1 |
| 3 0.244282 C  | 1 |
| 24 0.682708 M | 0 |
| 7 0.291878 R  | 0 |
| 21 0.525087 C | 1 |
| 11 0.6121 C   | 1 |
| 17 0.232193 C | 1 |
| 21 0.525087 C | 1 |
| 21 0.847565 D | 1 |
| 3 0.244282 C  | 1 |
| 9 0.114822 I  | 0 |
| 14 0.489586 C | 1 |
| 21 0.525087 C | 1 |
| 14 0.489586 C | 1 |
| 8 0.412418 Q  | 0 |
| 8 0.299715 C  | 1 |
| 19 0.370568 C | 1 |
| 17 0.232193 C | 1 |
| 18 0.614974 G | 0 |
| 17 0.540256 C | 1 |
| 17 0.540256 C | 1 |
| 5 0.291087    | 0 |
| 17 0.504093 A | 0 |
| 17 0.540256 C | 1 |
| 7 0.291878 R  | 0 |
| 3 0.244282 C  | 1 |
| 8 0.299715 C  | 1 |
| 14 0.489586 C | 1 |
| 2 0.457243 C  | 1 |
| 7 0.517493 C  | 1 |
| 18 0.614974 G | 0 |
| 3 0.244282 C  | 1 |
| 17 0.504093 A | 0 |
| 17 0.232193 C | 1 |
| 7 0.282247 C  | 1 |
| 5 0.291087    | 0 |
| 18 0.527426 I | 0 |
| 21 0.847565 D | 1 |
| 14 0.489586 C | 1 |
| 21 0.847565 D | 1 |
| 18 0.527426 I | 0 |
| 17 0.540256 C | 1 |
| 21 0.847565 D | 1 |
| 2 0.529807 C  | 1 |
| 5 0.284171 C  | 1 |
| 7 0.282247 C  | 1 |
| 9 0.114822 I  | 0 |
| 3 0.244282 C  | 1 |
| 7 0.282247 C  | 1 |
| 17 0.540256 C | 1 |
| 7 0.291878 R  | 0 |

|    |          |   |   |
|----|----------|---|---|
| 17 | 0.504093 | A | 0 |
| 17 | 0.540256 | C | 1 |
| 17 | 0.504093 | A | 0 |
| 17 | 0.232193 | C | 1 |
| 19 | 0.370568 | C | 1 |
| 17 | 0.232193 | C | 1 |
| 8  | 0.412418 | Q | 0 |
| 6  | 0.068284 | C | 1 |
| 5  | 0.291087 |   | 0 |
| 2  | 0.284951 | C | 1 |
| 7  | 0.363411 | C | 1 |
| 3  | 0.413795 | C | 1 |
| 8  | 0.412418 | Q | 0 |
| 2  | 0.529807 | C | 1 |
| 7  | 0.363411 | C | 1 |
| 14 | 0.510727 | I | 0 |
| 18 | 0.527426 | I | 0 |
| 21 | 0.847565 | D | 1 |
| 17 | 0.504093 | A | 0 |
| 11 | 0.6121   | C | 1 |
| 1  | 0.174087 | C | 1 |
| 6  | 0.27001  | C | 1 |
| 6  | 0.27001  | C | 1 |
| 6  | 0.27001  | C | 1 |
| 6  | 0.27001  | C | 1 |
| 6  | 0.27001  | C | 1 |
| 6  | 0.27001  | C | 1 |
| 6  | 0.27001  | C | 1 |
| 6  | 0.27001  | C | 1 |
| 6  | 0.27001  | C | 1 |
| 6  | 0.27001  | C | 1 |
| 6  | 0.27001  | C | 1 |
| 6  | 0.27001  | C | 1 |
| 6  | 0.27001  | C | 1 |
| 6  | 0.27001  | C | 1 |
| 2  | 0.607782 | C | 1 |
| 2  | 0.607782 | C | 1 |
| 7  | 0.36902  | C | 1 |
| 2  | 0.607782 | C | 1 |
| 7  | 0.36902  | C | 1 |
| 2  | 0.607782 | C | 1 |
| 2  | 0.607782 | C | 1 |
| 2  | 0.607782 | C | 1 |
| 2  | 0.607782 | C | 1 |
| 7  | 0.36902  | C | 1 |
| 7  | 0.36902  | C | 1 |
| 7  | 0.36902  | C | 1 |
| 2  | 0.607782 | C | 1 |
| 19 | 0.281294 | C | 1 |
| 19 | 0.281294 | C | 1 |
| 19 | 0.281294 | C | 1 |
| 19 | 0.281294 | C | 1 |
| 19 | 0.281294 | C | 1 |
| 17 | 0.620642 | C | 1 |
| 17 | 0.620642 | C | 1 |
| 17 | 0.620642 | C | 1 |
| 17 | 0.620642 | C | 1 |

|    |          |   |   |
|----|----------|---|---|
| 17 | 0.620642 | C | 1 |
| 17 | 0.620642 | C | 1 |
| 17 | 0.620642 | C | 1 |
| 17 | 0.620642 | C | 1 |
| 1  | 0.447909 | C | 1 |
| 1  | 0.447909 | C | 1 |
| 1  | 0.447909 | C | 1 |
| 1  | 0.447909 | C | 1 |
| 1  | 0.447909 | C | 1 |
| 1  | 0.447909 | C | 1 |
| 1  | 0.447909 | C | 1 |
| 1  | 0.447909 | C | 1 |
| 1  | 0.447909 | C | 1 |
| 1  | 0.447909 | C | 1 |
| 1  | 0.447909 | C | 1 |
| 7  | 0.348269 | C | 1 |
| 7  | 0.348269 | C | 1 |
| 7  | 0.348269 | C | 1 |
| 7  | 0.348269 | C | 1 |
| 7  | 0.348269 | C | 1 |
| 7  | 0.348269 | C | 1 |
| 7  | 0.348269 | C | 1 |
| 7  | 0.348269 | C | 1 |
| 7  | 0.348269 | C | 1 |
| 7  | 0.348269 | C | 1 |
| 7  | 0.348269 | C | 1 |
| 7  | 0.348269 | C | 1 |
| 7  | 0.348269 | C | 1 |
| 7  | 0.348269 | C | 1 |
| 7  | 0.348269 | C | 1 |
| 7  | 0.348269 | C | 1 |
| 7  | 0.348269 | C | 1 |
| 7  | 0.348269 | C | 1 |
| 7  | 0.348269 | C | 1 |
| 7  | 0.348269 | C | 1 |
| 7  | 0.348269 | C | 1 |
| 15 | 0.276869 | C | 1 |
| 11 | 0.421511 | C | 1 |
| 8  | 0.731466 | C | 1 |
| 11 | 0.421511 | C | 1 |
| 8  | 0.731466 | C | 1 |
| 1  | 0.218814 | I | 0 |
| 20 | 0.420942 | C | 1 |
| 17 | 0.601672 | C | 1 |
| 8  | 0.731466 | C | 1 |
| 1  | 0.308501 | C | 1 |
| 6  | 0.630634 | C | 1 |
| 24 | 0.691344 | C | 1 |
| 24 | 0.426161 | C | 1 |
| 1  | 0.18329  | C | 1 |
| 24 | 0.691344 | C | 1 |
| 11 | 0.421511 | C | 1 |
| 21 | 0.665051 | C | 1 |
| 17 | 0.601672 | C | 1 |
| 2  | 0.510548 | C | 1 |
| 11 | 0.38494  | C | 1 |
| 24 | 0.691344 | C | 1 |
| 6  | 0.117548 | I | 0 |
| 24 | 0.691344 | C | 1 |

|    |          |   |   |
|----|----------|---|---|
| 11 | 0.421511 | C | 1 |
| 7  | 0.463756 | C | 1 |
| 17 | 0.601672 | C | 1 |
| 17 | 0.601672 | C | 1 |
| 6  | 0.117548 | I | 0 |
| 8  | 0.731466 | C | 1 |
| 24 | 0.691344 | C | 1 |
| 24 | 0.691344 | C | 1 |
| 24 | 0.691344 | C | 1 |
| 24 | 0.691344 | C | 1 |
| 17 | 0.601672 | C | 1 |
| 17 | 0.601672 | C | 1 |
| 24 | 0.691344 | C | 1 |
| 21 | 0.665051 | C | 1 |
| 11 | 0.421511 | C | 1 |
| 7  | 0.463756 | C | 1 |
| 24 | 0.691344 | C | 1 |
| 7  | 0.463756 | C | 1 |
| 1  | 0.218814 | I | 0 |
| 24 | 0.691344 | C | 1 |
| 6  | 0.630634 | C | 1 |
| 11 | 0.421511 | C | 1 |
| 24 | 0.691344 | C | 1 |
| 24 | 0.691344 | C | 1 |
| 24 | 0.691344 | C | 1 |
| 7  | 0.255354 | C | 1 |
| 6  | 0.357233 | C | 1 |
| 17 | 0.601672 | C | 1 |
| 6  | 0.117548 | I | 0 |
| 6  | 0.630634 | C | 1 |
| 15 | 0.276869 | C | 1 |
| 24 | 0.691344 | C | 1 |
| 6  | 0.357233 | C | 1 |
| 24 | 0.426161 | C | 1 |
| 21 | 0.665051 | C | 1 |
| 15 | 0.276869 | C | 1 |
| 6  | 0.357233 | C | 1 |
| 15 | 0.276869 | C | 1 |
| 20 | 0.420942 | C | 1 |
| 8  | 0.731466 | C | 1 |
| 11 | 0.421511 | C | 1 |
| 20 | 0.420942 | C | 1 |
| 6  | 0.630634 | C | 1 |
| 24 | 0.426161 | C | 1 |
| 17 | 0.601672 | C | 1 |
| 7  | 0.463756 | C | 1 |
| 24 | 0.691344 | C | 1 |
| 17 | 0.601672 | C | 1 |
| 1  | 0.218814 | I | 0 |
| 24 | 0.426161 | C | 1 |
| 6  | 0.117548 | I | 0 |
| 1  | 0.44465  | C | 1 |
| 24 | 0.691344 | C | 1 |
| 15 | 0.276869 | C | 1 |

|    |          |   |   |
|----|----------|---|---|
| 24 | 0.691344 | C | 1 |
| 24 | 0.691344 | C | 1 |
| 24 | 0.691344 | C | 1 |
| 17 | 0.601672 | C | 1 |
| 15 | 0.276869 | C | 1 |
| 24 | 0.691344 | C | 1 |
| 2  | 0.510548 | C | 1 |
| 7  | 0.255354 | C | 1 |
| 24 | 0.691344 | C | 1 |
| 11 | 0.421511 | C | 1 |
| 11 | 0.421511 | C | 1 |
| 2  | 0.510548 | C | 1 |
| 17 | 0.601672 | C | 1 |
| 8  | 0.731466 | C | 1 |
| 11 | 0.421511 | C | 1 |
| 24 | 0.691344 | C | 1 |
| 11 | 0.421511 | C | 1 |
| 1  | 0.218814 | I | 0 |
| 24 | 0.691344 | C | 1 |
| 8  | 0.731466 | C | 1 |
| 21 | 0.665051 | C | 1 |
| 11 | 0.38494  | C | 1 |
| 6  | 0.357233 | C | 1 |
| 17 | 0.601672 | C | 1 |
| 24 | 0.691344 | C | 1 |
| 8  | 0.731466 | C | 1 |
| 6  | 0.630634 | C | 1 |
| 1  | 0.44465  | C | 1 |
| 24 | 0.691344 | C | 1 |
| 24 | 0.691344 | C | 1 |
| 6  | 0.630634 | C | 1 |
| 24 | 0.691344 | C | 1 |
| 6  | 0.630634 | C | 1 |
| 7  | 0.255354 | C | 1 |
| 6  | 0.603264 | C | 1 |
| 24 | 0.691344 | C | 1 |
| 6  | 0.603264 | C | 1 |
| 6  | 0.603264 | C | 1 |
| 8  | 0.731466 | C | 1 |
| 6  | 0.357233 | C | 1 |
| 21 | 0.665051 | C | 1 |
| 1  | 0.218814 | I | 0 |
| 20 | 0.420942 | C | 1 |
| 20 | 0.420942 | C | 1 |
| 24 | 0.691344 | C | 1 |
| 6  | 0.357233 | C | 1 |
| 20 | 0.420942 | C | 1 |
| 7  | 0.463756 | C | 1 |
| 11 | 0.38494  | C | 1 |
| 7  | 0.255354 | C | 1 |
| 24 | 0.691344 | C | 1 |
| 20 | 0.420942 | C | 1 |
| 6  | 0.630634 | C | 1 |
| 17 | 0.601672 | C | 1 |

|    |          |   |   |
|----|----------|---|---|
| 1  | 0.218814 | I | 0 |
| 11 | 0.421511 | C | 1 |
| 1  | 0.308501 | C | 1 |
| 24 | 0.426161 | C | 1 |
| 6  | 0.603264 | C | 1 |
| 1  | 0.308501 | C | 1 |
| 24 | 0.691344 | C | 1 |
| 8  | 0.731466 | C | 1 |
| 1  | 0.18329  | C | 1 |
| 21 | 0.665051 | C | 1 |
| 24 | 0.426161 | C | 1 |
| 8  | 0.731466 | C | 1 |
| 1  | 0.308501 | C | 1 |
| 24 | 0.691344 | C | 1 |
| 6  | 0.117548 | I | 0 |
| 11 | 0.421511 | C | 1 |
| 11 | 0.38494  | C | 1 |
| 2  | 0.510548 | C | 1 |
| 11 | 0.421511 | C | 1 |
| 6  | 0.603264 | C | 1 |
| 6  | 0.630634 | C | 1 |
| 8  | 0.731466 | C | 1 |
| 6  | 0.117548 | I | 0 |
| 6  | 0.630634 | C | 1 |
| 6  | 0.117548 | I | 0 |
| 21 | 0.665051 | C | 1 |
| 24 | 0.691344 | C | 1 |
| 8  | 0.731466 | C | 1 |
| 1  | 0.44465  | C | 1 |
| 20 | 0.420942 | C | 1 |
| 17 | 0.601672 | C | 1 |
| 11 | 0.421511 | C | 1 |
| 7  | 0.255354 | C | 1 |
| 6  | 0.630634 | C | 1 |
| 1  | 0.308501 | C | 1 |
| 15 | 0.276869 | C | 1 |
| 24 | 0.691344 | C | 1 |
| 1  | 0.308501 | C | 1 |
| 6  | 0.357233 | C | 1 |
| 6  | 0.603264 | C | 1 |
| 11 | 0.421511 | C | 1 |
| 8  | 0.731466 | C | 1 |
| 24 | 0.691344 | C | 1 |
| 8  | 0.731466 | C | 1 |
| 17 | 0.601672 | C | 1 |
| 1  | 0.18329  | C | 1 |
| 24 | 0.691344 | C | 1 |
| 6  | 0.357233 | C | 1 |
| 7  | 0.255354 | C | 1 |
| 24 | 0.691344 | C | 1 |
| 24 | 0.691344 | C | 1 |
| 20 | 0.420942 | C | 1 |
| 6  | 0.603264 | C | 1 |
| 24 | 0.691344 | C | 1 |



|    |          |   |   |
|----|----------|---|---|
| 7  | 0.463756 | C | 1 |
| 7  | 0.255354 | C | 1 |
| 11 | 0.421511 | C | 1 |
| 7  | 0.255354 | C | 1 |
| 2  | 0.510548 | C | 1 |
| 6  | 0.117548 | I | 0 |
| 24 | 0.691344 | C | 1 |
| 11 | 0.38494  | C | 1 |
| 6  | 0.117548 | I | 0 |
| 24 | 0.691344 | C | 1 |
| 7  | 0.255354 | C | 1 |
| 8  | 0.731466 | C | 1 |
| 6  | 0.603264 | C | 1 |
| 1  | 0.44465  | C | 1 |
| 1  | 0.44465  | C | 1 |
| 20 | 0.420942 | C | 1 |
| 24 | 0.691344 | C | 1 |
| 20 | 0.420942 | C | 1 |
| 21 | 0.665051 | C | 1 |
| 24 | 0.691344 | C | 1 |
| 24 | 0.426161 | C | 1 |
| 6  | 0.630634 | C | 1 |
| 7  | 0.255354 | C | 1 |
| 21 | 0.665051 | C | 1 |
| 20 | 0.420942 | C | 1 |
| 11 | 0.421511 | C | 1 |
| 17 | 0.601672 | C | 1 |
| 24 | 0.691344 | C | 1 |
| 20 | 0.420942 | C | 1 |
| 7  | 0.463756 | C | 1 |
| 6  | 0.117548 | I | 0 |
| 21 | 0.665051 | C | 1 |
| 7  | 0.255354 | C | 1 |
| 11 | 0.421511 | C | 1 |
| 11 | 0.38494  | C | 1 |
| 24 | 0.691344 | C | 1 |
| 6  | 0.357233 | C | 1 |
| 11 | 0.38494  | C | 1 |
| 24 | 0.691344 | C | 1 |
| 6  | 0.447016 | C | 1 |
| 10 | 0.272144 | I | 0 |
| 6  | 0.447016 | C | 1 |
| 5  | 0.13673  | C | 1 |
| 20 | 0.43516  | C | 1 |
| 2  | 0.288933 | C | 1 |
| 10 | 0.272144 | I | 0 |
| 10 | 0.272144 | I | 0 |
| 20 | 0.43516  | C | 1 |
| 6  | 0.312909 | C | 1 |
| 10 | 0.272144 | I | 0 |
| 2  | 0.288933 | C | 1 |
| 10 | 0.272144 | I | 0 |
| 10 | 0.272144 | I | 0 |
| 10 | 0.272144 | I | 0 |

|    |          |   |   |
|----|----------|---|---|
| 6  | 0.447016 | C | 1 |
| 6  | 0.312909 | C | 1 |
| 10 | 0.272144 | I | 0 |
| 5  | 0.13673  | C | 1 |
| 6  | 0.312909 | C | 1 |
| 2  | 0.288933 | C | 1 |
| 6  | 0.447016 | C | 1 |
| 6  | 0.447016 | C | 1 |
| 6  | 0.447016 | C | 1 |
| 6  | 0.447016 | C | 1 |
| 6  | 0.312909 | C | 1 |
| 6  | 0.312909 | C | 1 |
| 10 | 0.272144 | I | 0 |
| 6  | 0.312909 | C | 1 |
| 6  | 0.447016 | C | 1 |
| 10 | 0.272144 | I | 0 |
| 20 | 0.43516  | C | 1 |
| 6  | 0.447016 | C | 1 |
| 10 | 0.272144 | I | 0 |
| 20 | 0.43516  | C | 1 |
| 6  | 0.312909 | C | 1 |
| 20 | 0.43516  | C | 1 |
| 10 | 0.272144 | I | 0 |
| 6  | 0.312909 | C | 1 |
| 6  | 0.312909 | C | 1 |
| 5  | 0.13673  | C | 1 |
| 20 | 0.43516  | C | 1 |
| 16 | 0.612141 | C | 1 |
| 10 | 0.494556 | K | 1 |
| 16 | 0.612141 | C | 1 |
| 7  | 0.431908 | C | 1 |
| 10 | 0.494556 | K | 1 |
| 11 | 0.240273 | C | 1 |
| 14 | 0.734101 | C | 1 |
| 7  | 0.431908 | C | 1 |
| 10 | 0.494556 | K | 1 |
| 14 | 0.734101 | C | 1 |
| 23 | 0.622709 | C | 1 |
| 23 | 0.622709 | C | 1 |
| 23 | 0.622709 | C | 1 |
| 23 | 0.622709 | C | 1 |
| 14 | 0.734101 | C | 1 |
| 14 | 0.734101 | C | 1 |
| 7  | 0.431908 | C | 1 |
| 7  | 0.431908 | C | 1 |
| 7  | 0.431908 | C | 1 |
| 14 | 0.734101 | C | 1 |
| 14 | 0.734101 | C | 1 |
| 14 | 0.734101 | C | 1 |
| 10 | 0.494556 | K | 1 |
| 10 | 0.494556 | K | 1 |
| 10 | 0.494556 | K | 1 |
| 14 | 0.734101 | C | 1 |
| 7  | 0.431908 | C | 1 |

|    |          |   |   |
|----|----------|---|---|
| 11 | 0.240273 | C | 1 |
| 14 | 0.734101 | C | 1 |
| 16 | 0.612141 | C | 1 |
| 11 | 0.240273 | C | 1 |
| 11 | 0.240273 | C | 1 |
| 16 | 0.612141 | C | 1 |
| 10 | 0.494556 | K | 1 |
| 23 | 0.622709 | C | 1 |
| 7  | 0.431908 | C | 1 |
| 10 | 0.494556 | K | 1 |
| 16 | 0.612141 | C | 1 |
| 23 | 0.622709 | C | 1 |
| 23 | 0.622709 | C | 1 |
| 7  | 0.431908 | C | 1 |
| 11 | 0.240273 | C | 1 |
| 11 | 0.240273 | C | 1 |
| 11 | 0.240273 | C | 1 |
| 10 | 0.494556 | K | 1 |
| 10 | 0.494556 | K | 1 |
| 16 | 0.612141 | C | 1 |
| 14 | 0.734101 | C | 1 |
| 7  | 0.431908 | C | 1 |
| 16 | 0.612141 | C | 1 |
| 14 | 0.734101 | C | 1 |
| 10 | 0.494556 | K | 1 |
| 23 | 0.622709 | C | 1 |
| 11 | 0.240273 | C | 1 |
| 14 | 0.734101 | C | 1 |
| 23 | 0.622709 | C | 1 |
| 23 | 0.622709 | C | 1 |
| 7  | 0.431908 | C | 1 |
| 11 | 0.240273 | C | 1 |
| 23 | 0.622709 | C | 1 |
| 16 | 0.612141 | C | 1 |
| 14 | 0.734101 | C | 1 |
| 14 | 0.734101 | C | 1 |
| 23 | 0.622709 | C | 1 |
| 16 | 0.612141 | C | 1 |
| 23 | 0.622709 | C | 1 |
| 11 | 0.240273 | C | 1 |
| 2  | 0.320489 | C | 1 |
| 2  | 0.320489 | C | 1 |
| 2  | 0.320489 | C | 1 |
| 2  | 0.320489 | C | 1 |
| 2  | 0.320489 | C | 1 |
| 2  | 0.320489 | C | 1 |
| 2  | 0.320489 | C | 1 |
| 15 | 0.487187 | C | 1 |
| 15 | 0.487187 | C | 1 |
| 15 | 0.487187 | C | 1 |
| 15 | 0.487187 | C | 1 |
| 7  | 0.104109 | C | 1 |
| 15 | 0.487187 | C | 1 |
| 7  | 0.104109 | C | 1 |

|    |          |   |   |
|----|----------|---|---|
| 15 | 0.487187 | C | 1 |
| 15 | 0.487187 | C | 1 |
| 7  | 0.104109 | C | 1 |
| 7  | 0.104109 | C | 1 |
| 7  | 0.104109 | C | 1 |
| 15 | 0.487187 | C | 1 |
| 15 | 0.487187 | C | 1 |
| 15 | 0.487187 | C | 1 |
| 15 | 0.487187 | C | 1 |
| 7  | 0.104109 | C | 1 |
| 7  | 0.104109 | C | 1 |
| 15 | 0.487187 | C | 1 |
| 18 | 0.533928 | C | 1 |
| 18 | 0.533928 | C | 1 |
| 18 | 0.533928 | C | 1 |
| 18 | 0.533928 | C | 1 |
| 18 | 0.533928 | C | 1 |
| 18 | 0.533928 | C | 1 |
| 18 | 0.533928 | C | 1 |
| 18 | 0.533928 | C | 1 |
| 13 | 0.25191  | C | 1 |
| 13 | 0.25191  | C | 1 |
| 13 | 0.25191  | C | 1 |
| 13 | 0.25191  | C | 1 |
| 13 | 0.25191  | C | 1 |
| 13 | 0.25191  | C | 1 |
| 13 | 0.25191  | C | 1 |
| 13 | 0.25191  | C | 1 |
| 1  | 0.087193 | C | 1 |
| 6  | 0.469006 | C | 1 |
| 6  | 0.469006 | C | 1 |
| 6  | 0.469006 | C | 1 |
| 21 | 0.664157 | C | 1 |
| 6  | 0.469006 | C | 1 |
| 21 | 0.664157 | C | 1 |
| 6  | 0.469006 | C | 1 |
| 21 | 0.664157 | C | 1 |
| 20 | 0.387679 | C | 1 |
| 21 | 0.664157 | C | 1 |
| 20 | 0.387679 | C | 1 |
| 20 | 0.387679 | C | 1 |
| 6  | 0.469006 | C | 1 |
| 21 | 0.664157 | C | 1 |
| 6  | 0.469006 | C | 1 |
| 1  | 0.087193 | C | 1 |
| 6  | 0.469006 | C | 1 |
| 1  | 0.087193 | C | 1 |
| 6  | 0.469006 | C | 1 |
| 21 | 0.664157 | C | 1 |
| 21 | 0.664157 | C | 1 |
| 21 | 0.664157 | C | 1 |
| 7  | 0.434657 | C | 1 |
| 7  | 0.434657 | C | 1 |
| 7  | 0.434657 | C | 1 |
| 7  | 0.434657 | C | 1 |

|    |          |   |   |
|----|----------|---|---|
| 7  | 0.434657 | C | 1 |
| 7  | 0.434657 | C | 1 |
| 7  | 0.434657 | C | 1 |
| 7  | 0.434657 | C | 1 |
| 7  | 0.434657 | C | 1 |
| 19 | 0.203317 | D | 1 |
| 19 | 0.203317 | D | 1 |
| 7  | 0.672984 | C | 1 |
| 7  | 0.672984 | C | 1 |
| 19 | 0.203317 | D | 1 |
| 7  | 0.672984 | C | 1 |
| 7  | 0.672984 | C | 1 |
| 19 | 0.203317 | D | 1 |
| 7  | 0.672984 | C | 1 |
| 19 | 0.203317 | D | 1 |
| 7  | 0.672984 | C | 1 |
| 7  | 0.672984 | C | 1 |
| 7  | 0.672984 | C | 1 |
| 7  | 0.672984 | C | 1 |
| 7  | 0.672984 | C | 1 |
| 7  | 0.672984 | C | 1 |
| 19 | 0.203317 | D | 1 |
| 9  | 0.57854  | B | 1 |
| 17 | 0.6871   | C | 1 |
| 17 | 0.6871   | C | 1 |
| 2  | 0.39845  | C | 1 |
| 9  | 0.57854  | B | 1 |
| 17 | 0.6871   | C | 1 |
| 17 | 0.6871   | C | 1 |
| 2  | 0.415291 | C | 1 |
| 9  | 0.57854  | B | 1 |
| 2  | 0.39845  | C | 1 |
| 5  | 0.564146 | G | 0 |
| 2  | 0.415291 | C | 1 |
| 17 | 0.6871   | C | 1 |
| 9  | 0.57854  | B | 1 |
| 9  | 0.57854  | B | 1 |
| 5  | 0.564146 | G | 0 |
| 2  | 0.39845  | C | 1 |
| 9  | 0.57854  | B | 1 |
| 9  | 0.57854  | B | 1 |
| 9  | 0.57854  | B | 1 |
| 17 | 0.6871   | C | 1 |
| 2  | 0.39845  | C | 1 |
| 17 | 0.6871   | C | 1 |
| 9  | 0.57854  | B | 1 |
| 17 | 0.6871   | C | 1 |
| 9  | 0.57854  | B | 1 |
| 9  | 0.57854  | B | 1 |
| 2  | 0.415291 | C | 1 |
| 17 | 0.6871   | C | 1 |
| 9  | 0.57854  | B | 1 |
| 9  | 0.57854  | B | 1 |

|    |          |   |   |
|----|----------|---|---|
| 9  | 0.57854  | B | 1 |
| 17 | 0.6871   | C | 1 |
| 17 | 0.6871   | C | 1 |
| 9  | 0.57854  | B | 1 |
| 17 | 0.6871   | C | 1 |
| 17 | 0.6871   | C | 1 |
| 9  | 0.57854  | B | 1 |
| 5  | 0.564146 | G | 0 |
| 17 | 0.6871   | C | 1 |
| 9  | 0.57854  | B | 1 |
| 9  | 0.57854  | B | 1 |
| 2  | 0.39845  | C | 1 |
| 17 | 0.6871   | C | 1 |
| 17 | 0.6871   | C | 1 |
| 5  | 0.564146 | G | 0 |
| 9  | 0.57854  | B | 1 |
| 5  | 0.564146 | G | 0 |
| 2  | 0.415291 | C | 1 |
| 9  | 0.57854  | B | 1 |
| 9  | 0.57854  | B | 1 |
| 5  | 0.564146 | G | 0 |
| 5  | 0.564146 | G | 0 |
| 17 | 0.6871   | C | 1 |
| 2  | 0.415291 | C | 1 |
| 17 | 0.6871   | C | 1 |
| 5  | 0.564146 | G | 0 |
